# Supplementary material for: Identification by array comparative genomic hybridization of a new amplicon on chromosome 17q highly recurrent in BRCA1 mutated triple negative breast cancer
Source: PubMed Central journal article supplement (PMC4303204; doi:10.1186/s13058-014-0466-y), 2014-11-22
Supplement: 13058_2014_466_MOESM1_ESM.pdf [file 13058_2014_466_MOESM1_ESM.pdf]

| Chr Name | Start    | Stop     | Size   | No of Probes | Num Gains in Mutated | Num Losses in Mutated | -log10(PVal) Gain in Mutated | -log10(PVal) Loss in Mutated | Num Gains in Non Mutated | Num Losses in Non Mutated | -log10(PVal) Gain in Non Mutated | -log10(PVal) Loss in Non Mutated |
|----------|----------|----------|--------|--------------|----------------------|-----------------------|------------------------------|------------------------------|--------------------------|---------------------------|----------------------------------|----------------------------------|
| chr1     | 759762   | 890945   | 131184 | 3            | 1                    | 2                     | 0.30102999                   | 0.1575501                    | 0                        | 2                         | 0                                | 0.1575501                        |
| chr1     | 890945   | 891004   | 60     | 1            | 2                    | 2                     | 0.30102999                   | 0.1575501                    | 1                        | 2                         | 0.05404976                       | 0.1575501                        |
| chr1     | 891004   | 1084501  | 193498 | 4            | 0                    | 2                     | 0.61140001                   | 0.1575501                    | 0                        | 2                         | 0                                | 0.1575501                        |
| chr1     | 1084501  | 1110607  | 26107  | 2            | 2                    | 2                     | 0.61140001                   | 0.0429175                    | 0                        | 4                         | 0                                | 0.47744371                       |
| chr1     | 1110607  | 1189360  | 78754  | 2            | 2                    | 2                     | 0.61140001                   | 0.08289318                   | 0                        | 3                         | 0                                | 0.30102999                       |
| chr1     | 1189360  | 1249207  | 59848  | 3            | 2                    | 2                     | 0.61140001                   | 0.0429175                    | 0                        | 4                         | 0                                | 0.47744371                       |
| chr1     | 1249207  | 1446819  | 197613 | 1            | 1                    | 2                     | 0.30102999                   | 0.0429175                    | 0                        | 4                         | 0                                | 0.47744371                       |
| chr1     | 1446819  | 1786789  | 339971 | 7            | 1                    | 2                     | 0.30102999                   | 0.02162467                   | 0                        | 5                         | 0                                | 0.68214471                       |
| chr1     | 1786789  | 1786848  | 60     | 1            | 2                    | 2                     | 0.30102999                   | 0.02162467                   | 1                        | 5                         | 0.05404976                       | 0.68214471                       |
| chr1     | 1786848  | 1860942  | 74095  | 1            | 2                    | 2                     | 0.61140001                   | 0.02162467                   | 0                        | 5                         | 0                                | 0.68214471                       |
| chr1     | 1860942  | 1861001  | 60     | 1            | 2                    | 3                     | 0.61140001                   | 0.05670724                   | 0                        | 5                         | 0                                | 0.45545077                       |
| chr1     | 1861001  | 2013419  | 152419 | 3            | 1                    | 2                     | 0.30102999                   | 0.02162467                   | 0                        | 5                         | 0                                | 0.68214471                       |
| chr1     | 2013419  | 2080309  | 66891  | 2            | 1                    | 3                     | 0.30102999                   | 0.05670724                   | 0                        | 5                         | 0                                | 0.45545077                       |
| chr1     | 2080309  | 2186829  | 106521 | 3            | 1                    | 3                     | 0.30102999                   | 0.03070643                   | 0                        | 6                         | 0                                | 0.63695542                       |
| chr1     | 2186829  | 2239438  | 52610  | 1            | 1                    | 2                     | 0.30102999                   | 0.01053319                   | 0                        | 6                         | 0                                | 0.91219088                       |
| chr1     | 2239438  | 2281699  | 42262  | 2            | 2                    | 3                     | 0.61140001                   | 0.03070643                   | 0                        | 6                         | 0                                | 0.63695542                       |
| chr1     | 2281699  | 2335155  | 53457  | 1            | 1                    | 3                     | 0.30102999                   | 0.03070643                   | 0                        | 6                         | 0                                | 0.63695542                       |
| chr1     | 2335155  | 2455937  | 120783 | 1            | 1                    | 2                     | 0.30102999                   | 0.01053319                   | 0                        | 6                         | 0                                | 0.91219088                       |
| chr1     | 2455937  | 2495194  | 39258  | 2            | 2                    | 4                     | 0.30102999                   | 0.06713722                   | 1                        | 6                         | 0.05404976                       | 0.4441547                        |
| chr1     | 2495194  | 2723244  | 228151 | 2            | 2                    | 4                     | 0.61140001                   | 0.03070643                   | 0                        | 6                         | 0                                | 0.63695542                       |
| chr1     | 2723244  | 2785042  | 61699  | 2            | 2                    | 4                     | 0.61140001                   | 0.03812622                   | 0                        | 6                         | 0                                | 0.60763643                       |
| chr1     | 2785042  | 2850650  | 65609  | 2            | 2                    | 2                     | 0.1575501                    | 0.07511598                   | 2                        | 7                         | 0.1575501                        | 0.43181735                       |
| chr1     | 2850650  | 2996775  | 146126 | 3            | 2                    | 4                     | 0.61140001                   | 0.03812622                   | 0                        | 7                         | 0                                | 0.60763643                       |
| chr1     | 2996775  | 3138506  | 141732 | 2            | 1                    | 4                     | 0.30102999                   | 0.03812622                   | 0                        | 7                         | 0                                | 0.60763643                       |
| chr1     | 3138506  | 3197921  | 59416  | 2            | 1                    | 4                     | 0.05404976                   | 0.03812622                   | 2                        | 7                         | 0.30102999                       | 0.60763643                       |
| chr1     | 3197921  | 3197980  | 60     | 1            | 1                    | 4                     | 0.02438986                   | 0.03812622                   | 3                        | 7                         | 0.51676182                       | 0.60763643                       |
| chr1     | 3197980  | 3314899  | 116920 | 2            | 1                    | 3                     | 0.02438986                   | 0.01598258                   | 3                        | 7                         | 0.51676182                       | 0.84395715                       |
| chr1     | 3314899  | 3314958  | 60     | 1            | 2                    | 3                     | 0.08289318                   | 0.01598258                   | 3                        | 7                         | 0.30102999                       | 0.84395715                       |
| chr1     | 3314958  | 3354713  | 39756  | 1            | 2                    | 2                     | 0.08289318                   | 0.00493743                   | 3                        | 7                         | 0.30102999                       | 1.16581773                       |
| chr1     | 3354713  | 3354772  | 60     | 1            | 2                    | 2                     | 0.0429175                    | 0.00493743                   | 4                        | 7                         | 0.47744371                       | 1.16581773                       |
| chr1     | 3354772  | 3472908  | 118137 | 3            | 1                    | 2                     | 0.01091641                   | 0.00493743                   | 4                        | 7                         | 0.76005302                       | 1.16581773                       |
| chr1     | 3472908  | 3493063  | 20156  | 2            | 2                    | 2                     | 0.02162467                   | 0.00493743                   | 5                        | 7                         | 0.68214471                       | 1.16581773                       |
| chr1     | 3493063  | 3531051  | 37989  | 1            | 2                    | 2                     | 0.01091641                   | 0.00493743                   | 4                        | 7                         | 0.76005302                       | 1.16581773                       |
| chr1     | 3531051  | 3660051  | 129001 | 2            | 0                    | 2                     | 0                            | 0.00493743                   | 3                        | 7                         | 0.93173516                       | 1.16581773                       |
| chr1     | 3660051  | 3753484  | 93434  | 3            | 0                    | 3                     | 0                            | 0.01598258                   | 4                        | 7                         | 1.26272838                       | 0.84395715                       |
| chr1     | 3753484  | 3753543  | 60     | 1            | 2                    | 3                     | 0.0429175                    | 0.01598258                   | 4                        | 7                         | 0.47744371                       | 0.84395715                       |
| chr1     | 3753543  | 3800088  | 46546  | 1            | 1                    | 3                     | 0.01091641                   | 0.01598258                   | 3                        | 7                         | 0.76005302                       | 0.84395715                       |
| chr1     | 3800088  | 4028587  | 228500 | 1            | 0                    | 1                     | 0                            | 0.03070643                   | 1                        | 6                         | 0.30102999                       | 0.63695542                       |
| chr1     | 4028587  | 4087443  | 58857  | 1            | 0                    | 3                     | 0                            | 0.03070643                   | 0                        | 6                         | 0.63695542                       | 0.63695542                       |
| chr1     | 4087443  | 4271025  | 183583 | 2            | 0                    | 2                     | 0                            | 0.01053319                   | 0                        | 6                         | 0                                | 0.91219088                       |
| chr1     | 4271025  | 4316908  | 45884  | 2            | 0                    | 3                     | 0                            | 0.03070643                   | 0                        | 6                         | 0.63695542                       | 0.63695542                       |
| chr1     | 4316908  | 4401750  | 84843  | 2            | 1                    | 3                     | 0.30102999                   | 0.03070643                   | 0                        | 6                         | 0.63695542                       | 0.63695542                       |
| chr1     | 4401750  | 4458182  | 56433  | 1            | 1                    | 3                     | 0.30102999                   | 0.05670724                   | 0                        | 5                         | 0                                | 0.45545077                       |
| chr1     | 4458182  | 4629201  | 171020 | 2            | 0                    | 2                     | 0                            | 0.0429175                    | 0                        | 4                         | 0                                | 0.47744371                       |
| chr1     | 4629201  | 4725355  | 96155  | 2            | 1                    | 2                     | 0.30102999                   | 0.0429175                    | 0                        | 4                         | 0                                | 0.47744371                       |
| chr1     | 4725355  | 4958499  | 233145 | 4            | 0                    | 4                     | 0                            | 0.0429175                    | 0                        | 4                         | 0                                | 0.47744371                       |
| chr1     | 4958499  | 4958558  | 60     | 1            | 1                    | 3                     | 0.30102999                   | 0.10122019                   | 0                        | 4                         | 0                                | 0.30102999                       |
| chr1     | 4958558  | 5252926  | 294369 | 2            | 0                    | 2                     | 0                            | 0.0429175                    | 0                        | 4                         | 0                                | 0.47744371                       |
| chr1     | 5252926  | 5491640  | 238715 | 2            | 1                    | 2                     | 0.30102999                   | 0.02162467                   | 0                        | 5                         | 0                                | 0.68214471                       |
| chr1     | 5491640  | 5491699  | 60     | 1            | 1                    | 3                     | 0.30102999                   | 0.05670724                   | 0                        | 5                         | 0                                | 0.45545077                       |
| chr1     | 5491699  | 5578149  | 86451  | 1            | 1                    | 2                     | 0.30102999                   | 0.0429175                    | 0                        | 4                         | 0                                | 0.47744371                       |
| chr1     | 5578149  | 6130376  | 552228 | 7            | 1                    | 0                     | 0.30102999                   | 0                            | 0                        | 4                         | 0                                | 1.26272838                       |
| chr1     | 6130376  | 6282504  | 152129 | 4            | 1                    | 0                     | 0.30102999                   | 0                            | 0                        | 5                         | 0                                | 1.60515106                       |
| chr1     | 6282504  | 6411511  | 129008 | 3            | 1                    | 1                     | 0.30102999                   | 0.00478973                   | 0                        | 5                         | 0                                | 1.02643191                       |
| chr1     | 6411511  | 6457775  | 46265  | 2            | 1                    | 1                     | 0.1218695                    | 0.00478973                   | 1                        | 5                         | 0.1218695                        | 1.02643191                       |
| chr1     | 6457775  | 6524138  | 66364  | 1            | 1                    | 0                     | 0.30102999                   | 0                            | 0                        | 5                         | 0                                | 1.60515106                       |
| chr1     | 6524138  | 6524197  | 60     | 1            | 1                    | 1                     | 0.30102999                   | 0.00478973                   | 0                        | 5                         | 0                                | 1.02643191                       |
| chr1     | 6524197  | 6642305  | 118109 | 2            | 1                    | 0                     | 0.30102999                   | 0                            | 0                        | 5                         | 0                                | 1.60515106                       |
| chr1     | 6642305  | 6823203  | 180899 | 4            | 1                    | 1                     | 0.30102999                   | 0.00478973                   | 0                        | 5                         | 0                                | 1.02643191                       |
| chr1     | 6823203  | 6939147  | 115945 | 3            | 1                    | 2                     | 0.30102999                   | 0.02162467                   | 0                        | 5                         | 0                                | 0.68214471                       |
| chr1     | 6939147  | 7156165  | 217019 | 5            | 0                    | 3                     | 0.30102999                   | 0.05670724                   | 0                        | 5                         | 0                                | 0.45545077                       |
| chr1     | 7156165  | 7156224  | 60     | 1            | 1                    | 4                     | 0.30102999                   | 0.11390336                   | 0                        | 5                         | 0                                | 0.30102999                       |
| chr1     | 7156224  | 7251615  | 95392  | 2            | 0                    | 4                     | 0                            | 0.11390336                   | 0                        | 5                         | 0                                | 0.30102999                       |
| chr1     | 7251615  | 7350829  | 99215  | 2            | 0                    | 2                     | 0                            | 0.05670724                   | 0                        | 6                         | 0                                | 0.45545077                       |
| chr1     | 7350829  | 7469863  | 119035 | 3            | 0                    | 3                     | 0                            | 0.03070643                   | 0                        | 6                         | 0                                | 0.63695542                       |
| chr1     | 7469863  | 7527447  | 57585  | 1            | 0                    | 2                     | 0                            | 0.01053319                   | 0                        | 6                         | 0                                | 0.91219088                       |
| chr1     | 7527447  | 7630342  | 102896 | 3            | 0                    | 0                     | 0.03070643                   | 0                            | 0                        | 6                         | 0                                | 0.63695542                       |
| chr1     | 7630342  | 7630401  | 60     | 1            | 0                    | 4                     | 0                            | 0.06713722                   | 0                        | 6                         | 0                                | 0.4441547                        |
| chr1     | 7630401  | 7836835  | 206435 | 4            | 0                    | 3                     | 0.03070643                   | 0                            | 0                        | 6                         | 0                                | 0.63695542                       |
| chr1     | 7836835  | 7912091  | 75257  | 1            | 0                    | 2                     | 0                            | 0.02162467                   | 0                        | 5                         | 0                                | 0.68214471                       |
| chr1     | 7912091  | 7995264  | 83174  | 1            | 0                    | 2                     | 0                            | 0.0429175                    | 0                        | 4                         | 0                                | 0.47744371                       |
| chr1     | 7995264  | 8032149  | 36886  | 2            | 0                    | 2                     | 0                            | 0.02162467                   | 0                        | 5                         | 0                                | 0.68214471                       |
| chr1     | 8032149  | 8181042  | 148894 | 2            | 0                    | 1                     | 0                            | 0.01091641                   | 0                        | 4                         | 0                                | 0.76005302                       |
| chr1     | 8181042  | 8343754  | 162713 | 2            | 0                    | 0                     | 0                            | 0                            | 0                        | 4                         | 0                                | 1.26272838                       |
| chr1     | 8343754  | 8343813  | 60     | 1            | 0                    | 0                     | 0                            | 0                            | 1                        | 4                         | 0.30102999                       | 1.26272838                       |
| chr1     | 8343813  | 8380210  | 36398  | 1            | 0                    | 0                     | 0                            | 0                            | 1                        | 3                         | 0.30102999                       | 0.93173516                       |
| chr1     | 8380210  | 8427574  | 47365  | 1            | 0                    | 0                     | 0                            | 0                            | 1                        | 2                         | 0.30102999                       | 0.61140001                       |
| chr1     | 8427574  | 8427633  | 60     | 1            | 0                    | 1                     | 0                            | 0.05404976                   | 1                        | 2                         | 0.30102999                       | 0.30102999                       |
| chr1     | 8427633  | 8518072  | 90440  | 2            | 1                    | 0                     | 0                            | 0.1218695                    | 1                        | 1                         | 0.30102999                       | 0.1218695                        |
| chr1     | 8518072  | 8586452  | 68381  | 2            | 0                    | 1                     | 0                            | 0.1218695                    | 2                        | 1                         | 0.61140001                       | 0.1218695                        |
| chr1     | 8586452  | 8653009  | 66558  | 1            | 0                    | 1                     | 0                            | 0.1218695                    | 1                        | 1                         | 0.30102999                       | 0.1218695                        |
| chr1     | 8653009  | 8852383  | 199375 | 4            | 1                    | 1                     | 0.05404976                   | 0.1218695                    | 2                        | 1                         | 0.30102999                       | 0.1218695                        |
| chr1     | 8852383  | 8971819  | 119437 | 4            | 1                    | 1                     | 0.01091641                   | 0.1218695                    | 4                        | 1                         | 0.76005302                       | 0.1218695                        |
| chr1     | 8971819  | 9087907  | 116089 | 2            | 1                    | 1                     | 0.02438986                   | 0.1218695                    | 3                        | 1                         | 0.51676182                       | 0.1218695                        |
| chr1     | 9087907  | 9389926  | 302020 | 8            | 1                    | 1                     | 0.01091641                   | 0.1218695                    | 4                        | 1                         | 0.76005302                       | 0.1218695                        |
| chr1     | 9389926  | 9604625  | 214700 | 4            | 1                    | 1                     | 0.01091641                   | 0.05404976                   | 4                        | 2                         | 0.76005302                       | 0.30102999                       |
| chr1     | 9604625  | 9816708  | 212084 | 5            | 1                    | 1                     | 0.01091641                   | 0.02438986                   | 4                        | 3                         | 0.76005302                       | 0.51676182                       |
| chr1     | 9816708  | 9910349  | 93642  | 3            | 1                    | 1                     | 0.01091641                   | 0.00478973                   | 4                        | 5                         | 0.76005302                       | 1.02643191                       |
| chr1     | 9910349  | 9910408  | 60     | 1            | 1                    | 2                     | 0.01091641                   | 0.02162467                   | 4                        | 5                         | 0.76005302                       | 0.68214471                       |
| chr1     | 9910408  | 9953030  | 42623  | 1            | 1                    | 2                     | 0.01091641                   | 0.0429175                    | 4                        | 4                         | 0.76005302                       | 0.47744371                       |
| chr1     | 9953030  | 9990357  | 37328  | 1            | 1                    | 4                     | 0.01091641                   | 0.01091641                   | 4                        | 4                         | 0.76005302                       | 0.76005302                       |
| chr1     | 9990357  | 10059707 | 69351  | 2            | 1                    | 1                     | 0.01091641                   | 0.00478973                   | 0                        | 6                         | 0.76005302                       | 1.02643191                       |
| chr1     | 10059707 | 10059761 | 55     | 1            | 1                    | 2                     | 0.01091641                   | 0.01053319                   | 4                        | 6                         | 0.76005302                       | 0.91219088                       |
| chr1     | 10059761 | 10115173 | 55413  | 1            | 1                    | 2                     | 0.05404976                   | 0.01053319                   | 2                        | 6                         | 0.30102999                       | 0.91219088                       |
| chr1     | 10115173 | 10162949 | 47777  | 2            | 1                    | 2                     | 0.05404976                   | 0.00493743                   | 2                        | 7                         | 0.30102999                       | 1.16581773                       |
| chr1     | 10162949 | 10163008 | 60     | 1            | 2                    | 2                     | 0.02438986                   | 0.00221948                   | 3                        |                           |                                  |                                  |

|      |          |          |        |   |   |   |            |            |   |    |            |            |
|------|----------|----------|--------|---|---|---|------------|------------|---|----|------------|------------|
| chr1 | 11565652 | 11688767 | 123116 | 1 | 0 | 6 | 0          | 0.01518174 | 0 | 11 | 0          | 0.9449689  |
| chr1 | 11688767 | 11688826 | 60     | 1 | 0 | 6 | 0          | 0.00778066 | 0 | 12 | 0          | 1.17038931 |
| chr1 | 11688826 | 11854429 | 165604 | 7 | 0 | 6 | 0          | 0.02793176 | 0 | 10 | 0          | 0.74627054 |
| chr1 | 11854429 | 11865157 | 10729  | 2 | 0 | 6 | 0          | 0.01518174 | 0 | 11 | 0          | 0.9449689  |
| chr1 | 11865157 | 11900997 | 35841  | 1 | 0 | 6 | 0          | 0.02793176 | 0 | 10 | 0          | 0.74627054 |
| chr1 | 11900997 | 11917526 | 16530  | 2 | 0 | 6 | 0          | 0.04875589 | 0 | 9  | 0          | 0.5732208  |
| chr1 | 11917526 | 11917585 | 60     | 1 | 0 | 6 | 0          | 0.02793176 | 0 | 10 | 0          | 0.74627054 |
| chr1 | 11917585 | 11980367 | 62783  | 2 | 0 | 6 | 0          | 0.04875589 | 0 | 9  | 0          | 0.5732208  |
| chr1 | 11980367 | 12080379 | 100013 | 5 | 0 | 6 | 0          | 0.02793176 | 0 | 10 | 0          | 0.74627054 |
| chr1 | 12080379 | 12244030 | 163652 | 3 | 0 | 4 | 0          | 0.01077081 | 0 | 9  | 0          | 1.01542894 |
| chr1 | 12244030 | 12677466 | 433437 | 7 | 0 | 3 | 0          | 0.00378107 | 0 | 9  | 0          | 1.33111237 |
| chr1 | 12677466 | 12710136 | 32671  | 1 | 0 | 3 | 0          | 0.01598258 | 0 | 7  | 0          | 0.84395715 |
| chr1 | 12710136 | 12710195 | 60     | 1 | 0 | 3 | 0          | 0.01598258 | 1 | 7  | 0.30102999 | 0.84395715 |
| chr1 | 12710195 | 12743178 | 32984  | 1 | 0 | 3 | 0          | 0.03070643 | 1 | 6  | 0.30102999 | 0.63695542 |
| chr1 | 12743178 | 12839470 | 96293  | 2 | 0 | 3 | 0          | 0.03070643 | 0 | 6  | 0          | 0.63695542 |
| chr1 | 12839470 | 13804405 | 964936 | 1 | 0 | 1 | 0          | 0.00478973 | 0 | 5  | 0          | 1.02643191 |
| chr1 | 13804405 | 13804464 | 60     | 1 | 0 | 2 | 0          | 0.01053199 | 0 | 6  | 0          | 0.91219088 |
| chr1 | 13804464 | 13940920 | 136457 | 3 | 0 | 0 | 0          | 0          | 0 | 4  | 0          | 1.26272838 |
| chr1 | 13940920 | 13940976 | 57     | 1 | 0 | 1 | 0          | 0          | 0 | 5  | 0.30102999 | 1.02643191 |
| chr1 | 13940976 | 14112991 | 172016 | 3 | 0 | 1 | 0          | 0.00478973 | 1 | 5  | 0          | 1.02643191 |
| chr1 | 14112991 | 14124977 | 11987  | 2 | 0 | 4 | 0          | 0.11390336 | 0 | 5  | 0          | 0.30102999 |
| chr1 | 14124977 | 14303202 | 178226 | 3 | 0 | 1 | 0          | 0.00478973 | 0 | 5  | 0          | 1.02643191 |
| chr1 | 14303202 | 14303261 | 60     | 1 | 0 | 3 | 0          | 0.0079614  | 1 | 1  | 0.30102999 | 1.07548421 |
| chr1 | 14303261 | 14408766 | 105506 | 2 | 0 | 3 | 0          | 0.0079614  | 0 | 8  | 0          | 1.07548421 |
| chr1 | 14408766 | 14408825 | 60     | 1 | 0 | 5 | 0          | 0.04407651 | 0 | 6  | 0          | 0.58747015 |
| chr1 | 14408825 | 14466937 | 58113  | 1 | 0 | 2 | 0          | 0.01053199 | 0 | 6  | 0          | 0.91219088 |
| chr1 | 14466937 | 14524312 | 57376  | 2 | 0 | 2 | 0          | 0.01053199 | 1 | 6  | 0.30102999 | 0.91219088 |
| chr1 | 14524312 | 14524371 | 60     | 1 | 0 | 5 | 0          | 0.04407651 | 1 | 6  | 0.30102999 | 0.58747015 |
| chr1 | 14524371 | 14609757 | 85387  | 1 | 0 | 4 | 0          | 0.02074938 | 1 | 8  | 0.30102999 | 0.79906872 |
| chr1 | 14609757 | 14609816 | 60     | 1 | 0 | 5 | 0          | 0.04407651 | 1 | 8  | 0.30102999 | 0.58747015 |
| chr1 | 14609816 | 14808786 | 198971 | 1 | 0 | 3 | 0          | 0.0079614  | 1 | 8  | 0.30102999 | 1.07548421 |
| chr1 | 14808786 | 14808845 | 60     | 1 | 1 | 4 | 0.1218695  | 0.01077081 | 1 | 9  | 0.1218695  | 1.01542894 |
| chr1 | 14808845 | 14933994 | 125150 | 1 | 1 | 3 | 0.1218695  | 0.0079614  | 1 | 8  | 0.1218695  | 1.07548421 |
| chr1 | 14933994 | 14960403 | 26410  | 2 | 1 | 4 | 0.1218695  | 0.02074938 | 1 | 8  | 0.1218695  | 0.79906872 |
| chr1 | 14960403 | 15017526 | 57124  | 2 | 1 | 4 | 0.1218695  | 0.01077081 | 1 | 9  | 0.1218695  | 1.01542894 |
| chr1 | 15017526 | 15017585 | 60     | 1 | 1 | 5 | 0.1218695  | 0.01320236 | 1 | 10 | 0.1218695  | 0.97390707 |
| chr1 | 15017585 | 15150914 | 133330 | 2 | 1 | 5 | 0.30102999 | 0.02473314 | 0 | 9  | 0          | 0.76806864 |
| chr1 | 15150914 | 15150973 | 60     | 1 | 1 | 6 | 0.1218695  | 0.04875589 | 1 | 9  | 0.1218695  | 0.5732208  |
| chr1 | 15150973 | 15388857 | 237885 | 4 | 0 | 6 | 0          | 0.04875589 | 0 | 9  | 0          | 0.5732208  |
| chr1 | 15388857 | 15388916 | 60     | 1 | 0 | 6 | 0          | 0.04875589 | 2 | 9  | 0.61140001 | 0.5732208  |
| chr1 | 15388916 | 15443521 | 54606  | 1 | 0 | 5 | 0          | 0.04407651 | 2 | 8  | 0.61140001 | 0.58747015 |
| chr1 | 15443521 | 15536961 | 93441  | 4 | 0 | 5 | 0          | 0.02473314 | 2 | 8  | 0.61140001 | 0.76806864 |
| chr1 | 15536961 | 15692335 | 155375 | 5 | 0 | 5 | 0          | 0.01320236 | 2 | 10 | 0.61140001 | 0.97390707 |
| chr1 | 15692335 | 15794610 | 102276 | 4 | 0 | 5 | 0          | 0.01320236 | 1 | 10 | 0.30102999 | 0.97390707 |
| chr1 | 15794610 | 15808532 | 13923  | 2 | 0 | 6 | 0          | 0.01518174 | 3 | 11 | 0.93173516 | 0.9449689  |
| chr1 | 15808532 | 15849390 | 40859  | 3 | 0 | 5 | 0          | 0.00666883 | 3 | 11 | 0.30102999 | 1.20557689 |
| chr1 | 15849390 | 15900109 | 50720  | 2 | 0 | 6 | 0          | 0.01518174 | 3 | 11 | 0.93173516 | 0.9449689  |
| chr1 | 15900109 | 15955529 | 55421  | 1 | 0 | 5 | 0          | 0.01320236 | 2 | 10 | 0.61140001 | 0.97390707 |
| chr1 | 15955529 | 15987184 | 31656  | 1 | 0 | 4 | 0          | 0.00530919 | 2 | 10 | 0.61140001 | 1.2568129  |
| chr1 | 15987184 | 16023360 | 36177  | 2 | 0 | 4 | 0          | 0.00530919 | 3 | 10 | 0.61140001 | 1.2568129  |
| chr1 | 16023360 | 16023419 | 60     | 1 | 1 | 4 | 0.02438896 | 0.00530919 | 3 | 10 | 0.51676182 | 1.2568129  |
| chr1 | 16023419 | 16135436 | 112018 | 3 | 1 | 4 | 0.02438896 | 0.01077081 | 3 | 9  | 0.51676182 | 1.01542894 |
| chr1 | 16135436 | 16331428 | 195993 | 4 | 1 | 4 | 0.05404976 | 0.01077081 | 2 | 9  | 0.30102999 | 1.01542894 |
| chr1 | 16331428 | 16331487 | 60     | 1 | 1 | 5 | 0.02438896 | 0.02473314 | 3 | 9  | 0.51676182 | 0.76806864 |
| chr1 | 16331487 | 16343658 | 12172  | 1 | 0 | 5 | 0          | 0.02473314 | 3 | 9  | 0.93173516 | 0.76806864 |
| chr1 | 16343658 | 16392682 | 49025  | 5 | 0 | 5 | 0          | 0.02473314 | 2 | 9  | 0.61140001 | 0.76806864 |
| chr1 | 16392682 | 16397917 | 5236   | 2 | 0 | 5 | 0          | 0.01320236 | 2 | 10 | 0.61140001 | 0.97390707 |
| chr1 | 16397917 | 16479679 | 81763  | 5 | 1 | 5 | 0.05404976 | 0.01320236 | 2 | 10 | 0.30102999 | 0.97390707 |
| chr1 | 16479679 | 16561578 | 81900  | 2 | 0 | 5 | 0          | 0.01320236 | 0 | 10 | 0          | 0.97390707 |
| chr1 | 16561578 | 16620956 | 59379  | 2 | 0 | 5 | 0          | 0.02473314 | 0 | 9  | 0          | 0.76806864 |
| chr1 | 16620956 | 16786493 | 165538 | 6 | 0 | 5 | 0          | 0.01320236 | 1 | 10 | 0.30102999 | 0.97390707 |
| chr1 | 16786493 | 16840542 | 54050  | 1 | 0 | 5 | 0          | 0.02473314 | 1 | 9  | 0.30102999 | 0.76806864 |
| chr1 | 16840542 | 16963573 | 123032 | 1 | 0 | 5 | 0          | 0.04407651 | 1 | 8  | 0.30102999 | 0.58747015 |
| chr1 | 16963573 | 17048732 | 85160  | 2 | 0 | 5 | 0          | 0.02473314 | 1 | 9  | 0.30102999 | 0.76806864 |
| chr1 | 17048732 | 17231758 | 183027 | 2 | 0 | 5 | 0          | 0.01320236 | 1 | 10 | 0.30102999 | 0.97390707 |
| chr1 | 17231758 | 17303445 | 71688  | 2 | 1 | 5 | 0.01518174 | 0.00666883 | 1 | 11 | 0.30102999 | 0.9449689  |
| chr1 | 17303445 | 17336192 | 32748  | 2 | 0 | 6 | 0          | 0.00666883 | 1 | 11 | 0.30102999 | 1.20557689 |
| chr1 | 17336192 | 17336249 | 58     | 1 | 0 | 6 | 0          | 0.01518174 | 1 | 11 | 0.30102999 | 0.9449689  |
| chr1 | 17336249 | 17359608 | 23360  | 2 | 0 | 4 | 0          | 0.00247414 | 0 | 11 | 0          | 1.52371709 |
| chr1 | 17359608 | 17371292 | 11685  | 2 | 0 | 5 | 0          | 0.00666883 | 0 | 11 | 0          | 1.20557689 |
| chr1 | 17371292 | 17393588 | 22297  | 2 | 0 | 4 | 0          | 0.00247414 | 0 | 11 | 0          | 1.52371709 |
| chr1 | 17393588 | 17393647 | 60     | 1 | 0 | 5 | 0          | 0.00666883 | 0 | 11 | 0          | 1.20557689 |
| chr1 | 17393647 | 17535628 | 141982 | 3 | 0 | 5 | 0          | 0.01320236 | 0 | 10 | 0          | 0.97390707 |
| chr1 | 17535628 | 17584968 | 49341  | 3 | 0 | 6 | 0          | 0.02793176 | 0 | 10 | 0          | 0.74627054 |
| chr1 | 17584968 | 17610746 | 25779  | 2 | 0 | 6 | 0          | 0.01518174 | 0 | 11 | 0          | 0.9449689  |
| chr1 | 17610746 | 17721082 | 110337 | 3 | 0 | 6 | 0          | 0.04875589 | 0 | 9  | 0          | 0.5732208  |
| chr1 | 17721082 | 17721141 | 60     | 1 | 0 | 6 | 0          | 0.02793176 | 0 | 10 | 0          | 0.74627054 |
| chr1 | 17721141 | 17874116 | 152976 | 4 | 0 | 5 | 0          | 0.04407651 | 0 | 8  | 0          | 0.58747015 |
| chr1 | 17874116 | 17874175 | 60     | 1 | 0 | 6 | 0          | 0.04875589 | 0 | 9  | 0          | 0.5732208  |
| chr1 | 17874175 | 17904529 | 30355  | 1 | 0 | 5 | 0          | 0.02473314 | 0 | 9  | 0          | 0.76806864 |
| chr1 | 17904529 | 18041667 | 137139 | 4 | 0 | 6 | 0          | 0.01518174 | 0 | 11 | 0          | 0.9449689  |
| chr1 | 18041667 | 18083707 | 42041  | 2 | 0 | 6 | 0          | 0.00778066 | 0 | 12 | 0          | 1.17038931 |
| chr1 | 18083707 | 18219116 | 135410 | 4 | 0 | 6 | 0          | 0.01518174 | 0 | 11 | 0          | 0.9449689  |
| chr1 | 18219116 | 18307240 | 88125  | 1 | 0 | 6 | 0          | 0.02793176 | 0 | 10 | 0          | 0.74627054 |
| chr1 | 18307240 | 18400121 | 92882  | 1 | 0 | 5 | 0          | 0.01320236 | 0 | 10 | 0          | 0.97390707 |
| chr1 | 18400121 | 18528695 | 128575 | 3 | 0 | 3 | 0          | 0.00378107 | 0 | 9  | 0          | 1.33111237 |
| chr1 | 18528695 | 18563494 | 34800  | 2 | 0 | 4 | 0          | 0.00530919 | 0 | 10 | 0          | 1.2568129  |
| chr1 | 18563494 | 18563553 | 60     | 1 | 0 | 6 | 0          | 0.02793176 | 0 | 10 | 0          | 0.74627054 |
| chr1 | 18563553 | 18632233 | 68681  | 1 | 0 | 3 | 0          | 0.00378107 | 0 | 9  | 0          | 1.33111237 |
| chr1 | 18632233 | 18704902 | 72670  | 1 | 0 | 3 | 0          | 0.0079614  | 0 | 8  | 0          | 1.07548421 |
| chr1 | 18704902 | 18704961 | 60     | 1 | 0 | 4 | 0          | 0.01077081 | 0 | 8  | 0          | 1.01542894 |
| chr1 | 18704961 | 18900374 | 195414 | 3 | 0 | 3 | 0          | 0.00378107 | 0 | 9  | 0          | 1.33111237 |
| chr1 | 18900374 | 18900433 | 60     | 1 | 0 | 4 | 0          | 0.01077081 | 0 | 9  | 0          | 1.01542894 |
| chr1 | 18900433 | 18945458 | 45026  | 1 | 0 | 2 | 0          | 9.54E-04   | 0 | 9  | 0          | 1.74076927 |
| chr1 | 18945458 | 18957624 | 12167  | 2 | 0 | 2 | 0          | 9.54E-04   | 1 | 9  | 0.30102999 | 1.74076927 |
| chr1 | 18957624 | 18981595 | 23972  | 1 | 0 | 2 | 0          | 0.00221948 | 1 | 8  | 0.30102999 | 1.44210395 |
| chr1 | 18981595 | 18981654 | 60     | 1 | 0 | 3 | 0          | 0.0079614  | 2 | 8  | 0.61140001 | 1.07548421 |
| chr1 | 18981654 | 19086642 | 104989 | 4 | 0 | 3 | 0          | 0.01598258 | 2 | 7  | 0.61140001 | 0.84395715 |
| chr1 | 19086642 | 19179851 | 93210  | 1 | 0 | 3 | 0          | 0.03070643 | 2 | 6  | 0.61140001 | 0.6        |

|      |          |          |        |    |   |    |            |            |   |    |            |            |
|------|----------|----------|--------|----|---|----|------------|------------|---|----|------------|------------|
| chr1 | 20810221 | 20830940 | 20720  | 1  | 0 | 6  | 0          | 0.08122616 | 1 | 8  | 0.30102999 | 0.4250187  |
| chr1 | 20830940 | 20865498 | 34559  | 2  | 0 | 6  | 0          | 0.04875589 | 1 | 9  | 0.30102999 | 0.5732208  |
| chr1 | 20865498 | 20916440 | 50943  | 2  | 1 | 7  | 0          | 0.08584816 | 1 | 9  | 0.30102999 | 0.42015402 |
| chr1 | 20916440 | 20934057 | 17618  | 3  | 0 | 7  | 0          | 0.05232577 | 1 | 10 | 0.30102999 | 0.56314362 |
| chr1 | 20934057 | 20934116 | 60     | 1  | 0 | 8  | 0          | 0.08923391 | 1 | 10 | 0.61140001 | 0.4167287  |
| chr1 | 20934116 | 20972425 | 38310  | 1  | 0 | 8  | 0          | 0.08923391 | 1 | 10 | 0.30102999 | 0.4167287  |
| chr1 | 20972425 | 20984262 | 11838  | 1  | 0 | 7  | 0          | 0.05232577 | 1 | 10 | 0.30102999 | 0.56314362 |
| chr1 | 20984262 | 21034428 | 50167  | 2  | 0 | 8  | 0          | 0.08923391 | 1 | 10 | 0.30102999 | 0.4167287  |
| chr1 | 21034428 | 21103137 | 68710  | 3  | 0 | 10 | 0          | 0.21118145 | 1 | 10 | 0.30102999 | 0.21118145 |
| chr1 | 21103137 | 21186986 | 83850  | 2  | 0 | 7  | 0          | 0.05232577 | 1 | 10 | 0.30102999 | 0.56314362 |
| chr1 | 21186986 | 21268359 | 81374  | 2  | 0 | 5  | 0          | 0.01320236 | 1 | 10 | 0.30102999 | 0.97390707 |
| chr1 | 21268359 | 21427403 | 159045 | 5  | 1 | 5  | 0.1218695  | 0.01320236 | 1 | 10 | 0.1218695  | 0.97390707 |
| chr1 | 21427403 | 21449730 | 22328  | 1  | 1 | 5  | 0.1218695  | 0.02473314 | 1 | 9  | 0.1218695  | 0.76806864 |
| chr1 | 21449730 | 21573743 | 124014 | 3  | 1 | 4  | 0.1218695  | 0.01077081 | 1 | 9  | 0.1218695  | 1.01542894 |
| chr1 | 21573743 | 21598433 | 24691  | 2  | 1 | 5  | 0.1218695  | 0.02473314 | 1 | 9  | 0.1218695  | 0.76806864 |
| chr1 | 21598433 | 21658422 | 59990  | 2  | 1 | 6  | 0.1218695  | 0.04875589 | 1 | 9  | 0.1218695  | 0.5732208  |
| chr1 | 21658422 | 21938583 | 280162 | 7  | 1 | 5  | 0.1218695  | 0.02473314 | 1 | 9  | 0.1218695  | 0.76806864 |
| chr1 | 21938583 | 22021600 | 83018  | 2  | 1 | 4  | 0.1218695  | 0.02074938 | 1 | 8  | 0.1218695  | 0.79906872 |
| chr1 | 22021600 | 22050635 | 29036  | 1  | 0 | 3  | 0          | 0.01598258 | 1 | 7  | 0.30102999 | 0.84395715 |
| chr1 | 22050635 | 22078993 | 28359  | 2  | 0 | 3  | 0          | 0.00790714 | 1 | 8  | 0.30102999 | 1.07548421 |
| chr1 | 22078993 | 22100818 | 21826  | 2  | 0 | 3  | 0          | 0.00378107 | 1 | 9  | 0.30102999 | 1.33111237 |
| chr1 | 22100818 | 22164082 | 63265  | 1  | 0 | 3  | 0          | 0.00493743 | 1 | 7  | 0          | 1.16581773 |
| chr1 | 22164082 | 22223053 | 58972  | 2  | 0 | 3  | 0          | 0.01598258 | 1 | 7  | 0          | 0.84395715 |
| chr1 | 22223053 | 22250468 | 27416  | 2  | 0 | 3  | 0          | 0.01598258 | 1 | 7  | 0.30102999 | 0.84395715 |
| chr1 | 22250468 | 22308663 | 58196  | 1  | 1 | 1  | 0          | 0.00493743 | 1 | 7  | 0.30102999 | 1.16581773 |
| chr1 | 22308663 | 22416798 | 108136 | 4  | 1 | 0  | 0          | 8.47E-04   | 1 | 7  | 0.30102999 | 1.62048027 |
| chr1 | 22416798 | 22416857 | 60     | 1  | 0 | 4  | 0          | 0.03812622 | 1 | 7  | 0.30102999 | 0.60763643 |
| chr1 | 22416857 | 22461773 | 4497   | 1  | 0 | 2  | 0          | 0.02162467 | 1 | 5  | 0.30102999 | 0.68214471 |
| chr1 | 22461773 | 22580233 | 118461 | 1  | 0 | 0  | 0          | 0          | 1 | 5  | 0.30102999 | 1.60515106 |
| chr1 | 22580233 | 22713848 | 133616 | 2  | 0 | 2  | 0          | 0.02162467 | 1 | 5  | 0.30102999 | 0.68214471 |
| chr1 | 22713848 | 22713907 | 60     | 1  | 0 | 3  | 0          | 0.03070643 | 1 | 6  | 0.30102999 | 0.63695542 |
| chr1 | 22713907 | 22828159 | 114253 | 2  | 0 | 2  | 0          | 0.02162467 | 1 | 5  | 0.30102999 | 0.68214471 |
| chr1 | 22828159 | 22891616 | 63458  | 2  | 0 | 1  | 0          | 0.00478973 | 1 | 5  | 0.30102999 | 1.02643191 |
| chr1 | 22891616 | 22891675 | 60     | 1  | 0 | 2  | 0          | 0.01053319 | 1 | 6  | 0.30102999 | 0.91219088 |
| chr1 | 22891675 | 22964515 | 72841  | 1  | 0 | 2  | 0          | 0.02162467 | 1 | 5  | 0.30102999 | 0.68214471 |
| chr1 | 22964515 | 22964564 | 50     | 1  | 0 | 2  | 0          | 0.02162467 | 2 | 5  | 0.61140001 | 0.68214471 |
| chr1 | 22964564 | 23040846 | 76283  | 5  | 0 | 2  | 0          | 0.02162467 | 1 | 5  | 0.30102999 | 0.68214471 |
| chr1 | 23040846 | 23040905 | 60     | 1  | 0 | 2  | 0          | 0.00493743 | 1 | 7  | 0.61140001 | 1.16581773 |
| chr1 | 23040905 | 23104094 | 63190  | 1  | 0 | 2  | 0          | 0.01053319 | 1 | 6  | 0.61140001 | 0.91219088 |
| chr1 | 23104094 | 23172454 | 68361  | 1  | 0 | 0  | 0          | 0.00204627 | 2 | 6  | 0.61140001 | 1.31360226 |
| chr1 | 23172454 | 23199546 | 27093  | 1  | 0 | 1  | 0          | 0.00204627 | 1 | 6  | 0.30102999 | 1.31360226 |
| chr1 | 23199546 | 23241030 | 41485  | 2  | 0 | 2  | 0          | 0.01053319 | 1 | 6  | 0.30102999 | 0.91219088 |
| chr1 | 23241030 | 23241089 | 60     | 1  | 0 | 3  | 0          | 0.03070643 | 1 | 6  | 0.30102999 | 0.63695542 |
| chr1 | 23241089 | 23356988 | 115900 | 2  | 0 | 1  | 0          | 0.00478973 | 1 | 5  | 0.30102999 | 1.02643191 |
| chr1 | 23356988 | 23419852 | 62865  | 4  | 0 | 1  | 0          | 0.00204627 | 1 | 6  | 0.30102999 | 1.31360226 |
| chr1 | 23419852 | 23455790 | 35939  | 2  | 0 | 1  | 0          | 0.00204627 | 2 | 6  | 0.61140001 | 1.31360226 |
| chr1 | 23455790 | 23481411 | 25622  | 1  | 0 | 1  | 0          | 0.00204627 | 1 | 6  | 0.30102999 | 1.31360226 |
| chr1 | 23481411 | 23481470 | 60     | 1  | 0 | 2  | 0          | 0.01053319 | 1 | 6  | 0.30102999 | 0.91219088 |
| chr1 | 23481470 | 23519807 | 38338  | 1  | 0 | 1  | 0          | 0.00478973 | 1 | 5  | 0.30102999 | 1.02643191 |
| chr1 | 23519807 | 23607991 | 88185  | 2  | 0 | 1  | 0          | 0.00478973 | 2 | 5  | 0.61140001 | 1.02643191 |
| chr1 | 23607991 | 23660159 | 52169  | 4  | 0 | 1  | 0          | 0.00204627 | 2 | 6  | 0.61140001 | 1.31360226 |
| chr1 | 23660159 | 23689659 | 29501  | 2  | 0 | 0  | 0          | 0.03070643 | 2 | 6  | 0.61140001 | 0.63695542 |
| chr1 | 23689659 | 23689715 | 57     | 1  | 0 | 4  | 0          | 0.06713722 | 2 | 6  | 0.61140001 | 0.44141547 |
| chr1 | 23689715 | 23852626 | 162912 | 4  | 0 | 4  | 0          | 0.06713722 | 1 | 6  | 0.30102999 | 0.44141547 |
| chr1 | 23852626 | 23852685 | 60     | 1  | 0 | 4  | 0          | 0.06713722 | 2 | 6  | 0.61140001 | 0.44141547 |
| chr1 | 23852685 | 23885141 | 32457  | 2  | 0 | 3  | 0          | 0.03070643 | 1 | 6  | 0.30102999 | 0.63695542 |
| chr1 | 23885141 | 23886267 | 1127   | 2  | 0 | 3  | 0          | 0.03070643 | 2 | 6  | 0.61140001 | 0.63695542 |
| chr1 | 23886267 | 23929208 | 42942  | 1  | 0 | 3  | 0          | 0.05670724 | 1 | 5  | 0.30102999 | 0.45545077 |
| chr1 | 23929208 | 23966799 | 37592  | 1  | 0 | 3  | 0          | 0.10122019 | 1 | 4  | 0.30102999 | 0.30102999 |
| chr1 | 23966799 | 23966858 | 60     | 1  | 0 | 3  | 0          | 0.10122019 | 2 | 4  | 0.61140001 | 0.30102999 |
| chr1 | 23966858 | 24020118 | 53261  | 4  | 0 | 3  | 0          | 0.17593012 | 1 | 3  | 0.61140001 | 0.17593012 |
| chr1 | 24020118 | 24082303 | 62186  | 1  | 0 | 3  | 0          | 0.17593012 | 3 | 3  | 0.17593012 | 0.93173516 |
| chr1 | 24082303 | 24108598 | 26296  | 2  | 1 | 4  | 0.02438896 | 0.18734596 | 3 | 4  | 0.51676182 | 0.18734596 |
| chr1 | 24108598 | 24233533 | 124936 | 3  | 1 | 3  | 0.02438896 | 0.10122019 | 3 | 4  | 0.51676182 | 0.30102999 |
| chr1 | 24233533 | 24384595 | 151063 | 1  | 1 | 3  | 0          | 0.10122019 | 3 | 4  | 0.30102999 | 0.30102999 |
| chr1 | 24384595 | 24411975 | 27381  | 3  | 1 | 3  | 0.02438896 | 0.05670724 | 2 | 5  | 0.51676182 | 0.45545077 |
| chr1 | 24411975 | 24454660 | 44486  | 1  | 1 | 3  | 0.05404976 | 0.10122019 | 2 | 4  | 0.30102999 | 0.30102999 |
| chr1 | 24454660 | 24509558 | 53099  | 3  | 1 | 3  | 0.05404976 | 0.05670724 | 2 | 2  | 0.30102999 | 0.45545077 |
| chr1 | 24509558 | 24641638 | 132081 | 2  | 0 | 3  | 0.30102999 | 0.05670724 | 2 | 5  | 0          | 0.45545077 |
| chr1 | 24641638 | 24641697 | 60     | 1  | 1 | 4  | 0.30102999 | 0.11390336 | 1 | 5  | 0          | 0.30102999 |
| chr1 | 24641697 | 24684396 | 42700  | 3  | 0 | 3  | 0.30102999 | 0.10122019 | 1 | 4  | 0          | 0.30102999 |
| chr1 | 24684396 | 24684451 | 56     | 1  | 1 | 4  | 0.1218695  | 0.18734596 | 1 | 4  | 0.1218695  | 0.18734596 |
| chr1 | 24684451 | 24740328 | 55878  | 2  | 0 | 3  | 0.30102999 | 0.10122019 | 1 | 4  | 0          | 0.30102999 |
| chr1 | 24740328 | 24771675 | 31348  | 1  | 2 | 2  | 0.30102999 | 0.0429175  | 1 | 4  | 0          | 0.47744371 |
| chr1 | 24771675 | 24785922 | 14248  | 2  | 0 | 3  | 0.30102999 | 0.05670724 | 1 | 5  | 0          | 0.45545077 |
| chr1 | 24785922 | 24840969 | 55048  | 2  | 1 | 4  | 0.1218695  | 0.06713722 | 1 | 6  | 0.1218695  | 0.44141547 |
| chr1 | 24840969 | 24859795 | 18827  | 1  | 4 | 0  | 0.30102999 | 0.06713722 | 1 | 6  | 0          | 0.44141547 |
| chr1 | 24859795 | 24936357 | 76563  | 1  | 1 | 3  | 0.30102999 | 0.05670724 | 1 | 5  | 0          | 0.45545077 |
| chr1 | 24936357 | 24996383 | 60027  | 2  | 1 | 3  | 0.30102999 | 0.10122019 | 1 | 4  | 0          | 0.30102999 |
| chr1 | 24996383 | 24996442 | 60     | 1  | 1 | 3  | 0.30102999 | 0.03070643 | 1 | 6  | 0          | 0.63695542 |
| chr1 | 24996442 | 25119735 | 123294 | 2  | 1 | 3  | 0.30102999 | 0.00478973 | 1 | 5  | 0          | 1.02643191 |
| chr1 | 25119735 | 25235732 | 115998 | 3  | 1 | 2  | 0.30102999 | 0.02162467 | 1 | 5  | 0          | 0.68214471 |
| chr1 | 25235732 | 25235791 | 60     | 1  | 1 | 3  | 0.30102999 | 0.0079614  | 1 | 8  | 0          | 1.07548421 |
| chr1 | 25235791 | 25557914 | 321224 | 4  | 1 | 3  | 0.30102999 | 0.01598258 | 1 | 7  | 0          | 0.84395715 |
| chr1 | 25557914 | 26211420 | 653507 | 19 | 1 | 3  | 0.30102999 | 0.0079614  | 1 | 8  | 0          | 1.07548421 |
| chr1 | 26211420 | 26211479 | 60     | 1  | 1 | 4  | 0.30102999 | 0.02074938 | 1 | 8  | 0          | 0.79906872 |
| chr1 | 26211479 | 26226749 | 15271  | 1  | 1 | 3  | 0.30102999 | 0.0079614  | 1 | 8  | 0          | 1.07548421 |
| chr1 | 26226749 | 26259826 | 33078  | 4  | 1 | 4  | 0.30102999 | 0.02074938 | 1 | 8  | 0          | 0.79906872 |
| chr1 | 26259826 | 26259885 | 60     | 1  | 1 | 5  | 0.30102999 | 0.04407651 | 1 | 8  | 0          | 0.58747015 |
| chr1 | 26259885 | 26358405 | 98521  | 2  | 1 | 4  | 0.30102999 | 0.03812622 | 1 | 7  | 0          | 0.60763643 |
| chr1 | 26358405 | 26367040 | 8636   | 2  | 1 | 4  | 0.30102999 | 0.02074938 | 1 | 8  | 0          | 0.79906872 |
| chr1 | 26367040 | 26656547 | 289508 | 10 | 1 | 5  | 0.30102999 | 0.04407651 | 1 | 8  | 0          | 0.58747015 |
| chr1 | 26656547 | 26690641 | 34095  | 2  | 1 | 5  | 0.30102999 | 0.02473314 | 1 | 9  | 0          | 0.76806864 |
| chr1 | 26690641 | 26750642 | 60002  | 1  | 1 | 5  | 0.30102999 | 0.04407651 | 1 | 9  | 0          | 0.58747015 |
| chr1 | 26750642 | 26750701 | 60     | 1  | 1 | 5  | 0.30102999 | 0.02473314 | 1 | 9  | 0          | 0.76806864 |
| chr1 | 26750701 | 26759521 | 8821   | 1  |   |    |            |            |   |    |            |            |

|      |          |          |        |    |   |   |            |            |   |    |            |            |
|------|----------|----------|--------|----|---|---|------------|------------|---|----|------------|------------|
| chr1 | 28597020 | 28655666 | 58647  | 1  | 1 | 6 | 0.30102999 | 0.08122616 | 0 | 8  | 0          | 0.42501817 |
| chr1 | 28655666 | 28662408 | 6743   | 2  | 1 | 7 | 0.30102999 | 0.05232577 | 0 | 10 | 0          | 0.56314362 |
| chr1 | 28662408 | 28713293 | 50886  | 1  | 1 | 6 | 0.30102999 | 0.04875589 | 0 | 9  | 0          | 0.5732208  |
| chr1 | 28713293 | 28815665 | 102373 | 2  | 1 | 5 | 0.30102999 | 0.02473314 | 0 | 9  | 0          | 0.76806864 |
| chr1 | 28815665 | 28865136 | 49472  | 4  | 1 | 5 | 0.30102999 | 0.01320236 | 0 | 10 | 0          | 0.97390707 |
| chr1 | 28865136 | 28947613 | 82478  | 4  | 1 | 4 | 0.30102999 | 0.00530919 | 0 | 10 | 0          | 1.2568129  |
| chr1 | 28947613 | 28968884 | 21272  | 2  | 1 | 5 | 0.30102999 | 0.01320236 | 0 | 10 | 0          | 0.97390707 |
| chr1 | 28968884 | 29089758 | 120875 | 4  | 1 | 5 | 0.30102999 | 0.02473314 | 0 | 9  | 0          | 0.76806864 |
| chr1 | 29089758 | 29205448 | 115691 | 2  | 1 | 3 | 0.30102999 | 0.00378107 | 0 | 9  | 0          | 1.33111237 |
| chr1 | 29205448 | 29205507 | 60     | 1  | 1 | 4 | 0.30102999 | 0.01077081 | 0 | 9  | 0          | 1.01542894 |
| chr1 | 29205507 | 29277297 | 71791  | 2  | 1 | 3 | 0.30102999 | 0.00378107 | 0 | 9  | 0          | 1.33111237 |
| chr1 | 29277297 | 29361225 | 83929  | 2  | 1 | 2 | 0.30102999 | 0.00221948 | 0 | 8  | 0          | 1.44210395 |
| chr1 | 29361225 | 29386909 | 25685  | 1  | 1 | 1 | 0.30102999 | 3.39E-04   | 0 | 8  | 0          | 1.94674965 |
| chr1 | 29386909 | 29386968 | 60     | 1  | 1 | 2 | 0.30102999 | 0.00221948 | 0 | 8  | 0          | 1.44210395 |
| chr1 | 29386968 | 29443550 | 56583  | 2  | 1 | 2 | 0.30102999 | 0.00493743 | 0 | 7  | 0          | 1.16581773 |
| chr1 | 29443550 | 29527822 | 84273  | 3  | 1 | 2 | 0.30102999 | 9.54E-04   | 0 | 9  | 0          | 1.74076927 |
| chr1 | 29527822 | 29653134 | 125313 | 4  | 1 | 2 | 0.30102999 | 3.39E-04   | 0 | 9  | 0          | 1.94674965 |
| chr1 | 29653134 | 29859635 | 206502 | 2  | 1 | 1 | 0.30102999 | 8.47E-04   | 0 | 7  | 0          | 1.62048027 |
| chr1 | 29859635 | 30447087 | 587453 | 3  | 1 | 0 | 0.30102999 | 0          | 0 | 5  | 0          | 1.60515106 |
| chr1 | 30447087 | 30630199 | 183113 | 2  | 1 | 1 | 0.30102999 | 0.00204627 | 0 | 6  | 0          | 1.31360226 |
| chr1 | 30630199 | 30630258 | 60     | 1  | 1 | 1 | 0.30102999 | 8.47E-04   | 0 | 7  | 0          | 1.62048027 |
| chr1 | 30630258 | 30717129 | 86872  | 2  | 1 | 1 | 0.30102999 | 0.00204627 | 0 | 6  | 0          | 1.31360226 |
| chr1 | 30717129 | 31047671 | 330543 | 2  | 1 | 1 | 0.30102999 | 0.00478973 | 0 | 5  | 0          | 1.02643191 |
| chr1 | 31047671 | 31184216 | 136546 | 2  | 1 | 1 | 0.30102999 | 0.00204627 | 0 | 6  | 0          | 1.31360226 |
| chr1 | 31184216 | 31226876 | 42661  | 3  | 1 | 1 | 0.1218695  | 0.00204627 | 1 | 6  | 0.1218695  | 1.31360226 |
| chr1 | 31226876 | 31315434 | 88559  | 2  | 1 | 1 | 0.05404976 | 8.47E-04   | 2 | 7  | 0.30102999 | 1.62048027 |
| chr1 | 31315434 | 31350724 | 35291  | 2  | 1 | 1 | 0.05404976 | 3.39E-04   | 2 | 8  | 0.30102999 | 1.94674965 |
| chr1 | 31350724 | 31467875 | 117152 | 2  | 1 | 1 | 0.1218695  | 3.39E-04   | 1 | 8  | 0.1218695  | 1.94674965 |
| chr1 | 31467875 | 31660110 | 192236 | 6  | 1 | 1 | 0.1218695  | 1.30E-04   | 1 | 9  | 0.1218695  | 2.29264207 |
| chr1 | 31660110 | 31710763 | 50654  | 1  | 1 | 1 | 0.1218695  | 3.39E-04   | 1 | 8  | 0.1218695  | 1.94674965 |
| chr1 | 31710763 | 31710822 | 60     | 1  | 1 | 1 | 0.05404976 | 3.39E-04   | 2 | 8  | 0.30102999 | 1.94674965 |
| chr1 | 31710822 | 31827548 | 116727 | 2  | 1 | 1 | 0.1218695  | 3.39E-04   | 1 | 8  | 0.1218695  | 1.94674965 |
| chr1 | 31827548 | 31897250 | 69703  | 2  | 1 | 1 | 0.05404976 | 3.39E-04   | 2 | 2  | 0.30102999 | 1.94674965 |
| chr1 | 31897250 | 31966338 | 69089  | 5  | 1 | 2 | 0.05404976 | 0.00221948 | 2 | 8  | 0.30102999 | 1.44210395 |
| chr1 | 31966338 | 31966397 | 60     | 1  | 1 | 3 | 0.05404976 | 0.0079614  | 2 | 8  | 0.30102999 | 1.07548421 |
| chr1 | 31966397 | 32200305 | 233909 | 7  | 1 | 2 | 0.05404976 | 0.00221948 | 2 | 8  | 0.30102999 | 1.44210395 |
| chr1 | 32200305 | 32263127 | 62823  | 2  | 1 | 2 | 0.02438896 | 0.00221948 | 3 | 8  | 0.51676182 | 1.44210395 |
| chr1 | 32263127 | 32263184 | 58     | 1  | 1 | 2 | 0.01091641 | 0.00221948 | 4 | 4  | 0.76005302 | 1.44210395 |
| chr1 | 32263184 | 32278079 | 14896  | 1  | 1 | 2 | 0.05404976 | 0.00221948 | 2 | 8  | 0.30102999 | 1.44210395 |
| chr1 | 32278079 | 32362921 | 84843  | 2  | 1 | 3 | 0.05404976 | 0.0079614  | 2 | 8  | 0.30102999 | 1.07548421 |
| chr1 | 32362921 | 32489401 | 126481 | 5  | 1 | 4 | 0.02438896 | 0.02074938 | 3 | 8  | 0.51676182 | 0.79906872 |
| chr1 | 32489401 | 32504134 | 14734  | 1  | 1 | 4 | 0.05404976 | 0.02074938 | 2 | 8  | 0.30102999 | 0.79906872 |
| chr1 | 32504134 | 32697316 | 193183 | 14 | 1 | 4 | 0.02438896 | 0.02074938 | 3 | 8  | 0.51676182 | 0.79906872 |
| chr1 | 32697316 | 32713551 | 16236  | 2  | 1 | 4 | 0.02438896 | 0.03812622 | 3 | 7  | 0.51676182 | 0.60763643 |
| chr1 | 32713551 | 32936586 | 223036 | 10 | 1 | 4 | 0.02438896 | 0.02074938 | 3 | 8  | 0.51676182 | 0.79906872 |
| chr1 | 32936586 | 32985991 | 49406  | 1  | 1 | 4 | 0.02438896 | 0.03812622 | 3 | 7  | 0.51676182 | 0.60763643 |
| chr1 | 32985991 | 33065896 | 79906  | 4  | 1 | 4 | 0.02438896 | 0.02074938 | 3 | 8  | 0.51676182 | 0.79906872 |
| chr1 | 33065896 | 33093081 | 27186  | 1  | 1 | 4 | 0.02438896 | 0.03812622 | 3 | 7  | 0.51676182 | 0.60763643 |
| chr1 | 33093081 | 33146307 | 53227  | 4  | 1 | 4 | 0.01091641 | 0.03812622 | 4 | 7  | 0.76005302 | 0.60763643 |
| chr1 | 33146307 | 33276552 | 130246 | 3  | 1 | 4 | 0.02438896 | 0.03812622 | 3 | 7  | 0.51676182 | 0.60763643 |
| chr1 | 33276552 | 33364705 | 88154  | 6  | 1 | 3 | 0.02438896 | 0.01598258 | 3 | 7  | 0.51676182 | 0.84395715 |
| chr1 | 33364705 | 33478678 | 113974 | 3  | 1 | 2 | 0.02438896 | 0.00493743 | 3 | 7  | 0.51676182 | 1.16581773 |
| chr1 | 33478678 | 33499598 | 21281  | 1  | 1 | 2 | 0.05404976 | 0.00493743 | 2 | 7  | 0.30102999 | 1.16581773 |
| chr1 | 33499598 | 33550093 | 50136  | 1  | 1 | 2 | 0.05404976 | 0.01053319 | 2 | 6  | 0.30102999 | 0.91219088 |
| chr1 | 33550093 | 33550151 | 59     | 1  | 1 | 2 | 0.01091641 | 0.01053319 | 4 | 6  | 0.76005302 | 0.91219088 |
| chr1 | 33550151 | 33576903 | 26753  | 1  | 1 | 2 | 0.02438896 | 0.01053319 | 3 | 6  | 0.51676182 | 0.91219088 |
| chr1 | 33576903 | 33576962 | 60     | 1  | 1 | 2 | 0.02438896 | 0.00493743 | 3 | 7  | 0.51676182 | 1.16581773 |
| chr1 | 33576962 | 33607663 | 30702  | 1  | 1 | 2 | 0.02438896 | 0.01053319 | 3 | 6  | 0.51676182 | 0.91219088 |
| chr1 | 33607663 | 33637215 | 29553  | 1  | 1 | 2 | 0.05404976 | 0.01053319 | 2 | 6  | 0.30102999 | 0.91219088 |
| chr1 | 33637215 | 33637274 | 60     | 1  | 1 | 2 | 0.05404976 | 0.00493743 | 2 | 7  | 0.30102999 | 1.16581773 |
| chr1 | 33637274 | 34024160 | 386887 | 10 | 1 | 2 | 0.05404976 | 0.01053319 | 2 | 6  | 0.30102999 | 0.91219088 |
| chr1 | 34024160 | 34227784 | 203625 | 5  | 1 | 2 | 0.05404976 | 0.01262467 | 2 | 5  | 0.30102999 | 0.68214471 |
| chr1 | 34227784 | 34239841 | 102058 | 2  | 1 | 1 | 0.05404976 | 0.01091641 | 2 | 4  | 0.30102999 | 0.76005302 |
| chr1 | 34239841 | 34330945 | 205    | 2  | 1 | 1 | 0.05404976 | 0.01091641 | 2 | 4  | 0.1575501  | 0.76005302 |
| chr1 | 34330945 | 34330948 | 3      | 1  | 1 | 1 | 0.1575501  | 0          | 2 | 3  | 0.1575501  | 0.51676182 |
| chr1 | 34330948 | 34580598 | 208651 | 5  | 1 | 2 | 0.08289318 | 0.02438896 | 3 | 3  | 0.30102999 | 0.51676182 |
| chr1 | 34580598 | 34635582 | 44985  | 2  | 1 | 1 | 0.1575501  | 0.02438896 | 2 | 3  | 0.1575501  | 0.51676182 |
| chr1 | 34635582 | 34693419 | 57838  | 3  | 1 | 2 | 0.08289318 | 0.02438896 | 3 | 3  | 0.30102999 | 0.51676182 |
| chr1 | 34693419 | 34833515 | 140097 | 1  | 1 | 3 | 0.02438896 | 0.02438896 | 3 | 3  | 0.51676182 | 0.51676182 |
| chr1 | 34833515 | 34966903 | 133389 | 1  | 1 | 1 | 0.05404976 | 0.02438896 | 2 | 3  | 0.30102999 | 0.51676182 |
| chr1 | 34966903 | 35055063 | 88161  | 2  | 1 | 2 | 0.1575501  | 0.02438896 | 2 | 2  | 0.1575501  | 0.51676182 |
| chr1 | 35055063 | 35132942 | 77880  | 2  | 1 | 1 | 0.08289318 | 0.02438896 | 3 | 3  | 0.30102999 | 0.51676182 |
| chr1 | 35132942 | 35133001 | 60     | 1  | 1 | 1 | 0.08289318 | 0.01091641 | 3 | 4  | 0.30102999 | 0.76005302 |
| chr1 | 35133001 | 35191472 | 58472  | 2  | 1 | 0 | 0.08289318 | 0          | 3 | 4  | 0.30102999 | 1.26272838 |
| chr1 | 35191472 | 35397728 | 206257 | 5  | 1 | 2 | 0.0429175  | 0          | 4 | 4  | 0.47744371 | 1.26272838 |
| chr1 | 35397728 | 35397787 | 60     | 1  | 1 | 1 | 0.02162467 | 0.01091641 | 5 | 4  | 0.68214471 | 0.76005302 |
| chr1 | 35397787 | 35496289 | 98503  | 3  | 1 | 2 | 0.0429175  | 0.01091641 | 4 | 4  | 0.47744371 | 0.76005302 |
| chr1 | 35496289 | 35570289 | 74001  | 2  | 1 | 1 | 0.01091641 | 0.02438896 | 4 | 3  | 0.76005302 | 0.51676182 |
| chr1 | 35570289 | 35582023 | 11735  | 2  | 1 | 1 | 0.02162467 | 0.01091641 | 5 | 4  | 0.68214471 | 0.76005302 |
| chr1 | 35582023 | 35652402 | 70380  | 1  | 1 | 2 | 0.02162467 | 0          | 3 | 3  | 0.68214471 | 0.93173516 |
| chr1 | 35652402 | 35741534 | 89133  | 3  | 1 | 2 | 0.02162467 | 0          | 5 | 4  | 0.68214471 | 1.26272838 |
| chr1 | 35741534 | 35806757 | 65224  | 1  | 1 | 2 | 0.0429175  | 0          | 4 | 4  | 0.47744371 | 1.26272838 |
| chr1 | 35806757 | 35836194 | 29438  | 2  | 1 | 0 | 0.0429175  | 0          | 4 | 5  | 0.47744371 | 1.60515106 |
| chr1 | 35836194 | 35836253 | 60     | 1  | 1 | 2 | 0.02162467 | 0          | 5 | 5  | 0.68214471 | 1.60515106 |
| chr1 | 35836253 | 35881147 | 44895  | 1  | 1 | 0 | 0.0429175  | 0          | 4 | 5  | 0.47744371 | 1.60515106 |
| chr1 | 35881147 | 35925920 | 44774  | 2  | 1 | 1 | 0.0429175  | 0.00478973 | 4 | 5  | 0.47744371 | 1.02643191 |
| chr1 | 35925920 | 35972436 | 46517  | 2  | 1 | 2 | 0.02162467 | 0.02162467 | 5 | 5  | 0.68214471 | 0.68214471 |
| chr1 | 35972436 | 36067956 | 95521  | 6  | 1 | 2 | 0.01053319 | 0.02162467 | 6 | 5  | 0.91219088 | 0.68214471 |
| chr1 | 36067956 | 36154746 | 86791  | 3  | 1 | 2 | 0.00493743 | 0.02162467 | 7 | 5  | 1.16581773 | 0.68214471 |
| chr1 | 36154746 | 36205014 | 50269  | 3  | 1 | 2 | 0.01053319 | 0.02162467 | 6 | 5  | 0.91219088 | 0.68214471 |
| chr1 | 36205014 | 36234382 | 29969  | 2  | 1 | 2 | 0.00493743 | 0.02162467 | 7 | 5  | 1.16581773 | 0.68214471 |
| chr1 | 36234382 | 36375539 | 141158 | 4  | 1 | 2 | 0.02162467 | 0.02162467 | 5 | 5  | 0.68214471 | 0.68214471 |
| chr1 | 36375539 |          |        |    |   |   |            |            |   |    |            |            |

|      |          |          |        |    |   |   |            |            |   |   |            |            |
|------|----------|----------|--------|----|---|---|------------|------------|---|---|------------|------------|
| chr1 | 39898787 | 40033403 | 134617 | 2  | 2 | 2 | 0.01053319 | 0.0429175  | 6 | 4 | 0.91219088 | 0.47744371 |
| chr1 | 40033403 | 40033462 | 60     | 1  | 2 | 2 | 0.00493743 | 0.0429175  | 7 | 4 | 1.16581773 | 0.47744371 |
| chr1 | 40033462 | 40128786 | 95325  | 2  | 2 | 2 | 0.01053319 | 0.0429175  | 6 | 4 | 0.91219088 | 0.47744371 |
| chr1 | 40128786 | 40224348 | 95563  | 5  | 2 | 2 | 0.00493743 | 0.0429175  | 7 | 4 | 1.16581773 | 0.47744371 |
| chr1 | 40224348 | 40256963 | 32616  | 2  | 2 | 2 | 0.00493743 | 0.08289318 | 7 | 3 | 1.16581773 | 0.30102999 |
| chr1 | 40256963 | 40313633 | 56671  | 2  | 2 | 1 | 0.00493743 | 0.02438896 | 7 | 3 | 1.16581773 | 0.51676182 |
| chr1 | 40313633 | 40313692 | 60     | 1  | 2 | 2 | 0.00493743 | 0.08289318 | 7 | 3 | 1.16581773 | 0.30102999 |
| chr1 | 40313692 | 40421743 | 108052 | 4  | 2 | 1 | 0.01053319 | 0.02438896 | 6 | 3 | 0.91219088 | 0.51676182 |
| chr1 | 40421743 | 40509662 | 87920  | 3  | 2 | 1 | 0.01053319 | 0.01091641 | 6 | 4 | 0.91219088 | 0.76005302 |
| chr1 | 40509662 | 40538616 | 28955  | 3  | 2 | 1 | 0.00221948 | 0.01091641 | 8 | 4 | 1.44210395 | 0.76005302 |
| chr1 | 40538616 | 40831159 | 292544 | 7  | 2 | 1 | 0.01053319 | 0.01091641 | 6 | 4 | 0.91219088 | 0.76005302 |
| chr1 | 40831159 | 41013737 | 182579 | 4  | 2 | 1 | 0.01053319 | 0.02438896 | 6 | 3 | 0.91219088 | 0.51676182 |
| chr1 | 41013737 | 41013796 | 60     | 1  | 2 | 1 | 0.01053319 | 0.01091641 | 6 | 4 | 0.91219088 | 0.76005302 |
| chr1 | 41013796 | 41088145 | 74350  | 2  | 2 | 1 | 0.01053319 | 0.02438896 | 6 | 3 | 0.91219088 | 0.51676182 |
| chr1 | 41088145 | 41126424 | 38280  | 2  | 2 | 1 | 0.01053319 | 0.01091641 | 6 | 4 | 0.91219088 | 0.76005302 |
| chr1 | 41126424 | 41234054 | 107631 | 4  | 2 | 1 | 0.01053319 | 0.02438896 | 6 | 3 | 0.91219088 | 0.51676182 |
| chr1 | 41234054 | 41234113 | 60     | 1  | 2 | 2 | 0.01053319 | 0.08289318 | 6 | 3 | 0.91219088 | 0.30102999 |
| chr1 | 41234113 | 41292272 | 58160  | 1  | 2 | 1 | 0.02162467 | 0.02438896 | 5 | 3 | 0.68214471 | 0.51676182 |
| chr1 | 41292272 | 41292331 | 60     | 1  | 2 | 1 | 0.02162467 | 0.01091641 | 5 | 4 | 0.68214471 | 0.76005302 |
| chr1 | 41292331 | 41326707 | 34377  | 1  | 2 | 1 | 0.02162467 | 0.02438896 | 5 | 3 | 0.68214471 | 0.51676182 |
| chr1 | 41326707 | 41366489 | 39783  | 2  | 2 | 1 | 0.01053319 | 0.02438896 | 6 | 3 | 0.91219088 | 0.51676182 |
| chr1 | 41366489 | 41484999 | 118511 | 4  | 2 | 0 | 0.01053319 | 0          | 6 | 3 | 0.91219088 | 0.93173516 |
| chr1 | 41484999 | 41485058 | 60     | 1  | 2 | 1 | 0.01053319 | 0          | 6 | 3 | 0.91219088 | 0.51676182 |
| chr1 | 41485058 | 41623469 | 138412 | 3  | 2 | 0 | 0.02162467 | 0          | 5 | 3 | 0.68214471 | 0.93173516 |
| chr1 | 41623469 | 41706567 | 83099  | 3  | 2 | 0 | 0.00493743 | 0          | 7 | 3 | 1.16581773 | 0.93173516 |
| chr1 | 41706567 | 41944420 | 237854 | 3  | 2 | 0 | 0.00204627 | 0          | 6 | 3 | 1.31360226 | 0.93173516 |
| chr1 | 41944420 | 41975850 | 31431  | 3  | 1 | 0 | 8.47E-04   | 0          | 7 | 3 | 1.62048027 | 0.93173516 |
| chr1 | 41975850 | 41975909 | 60     | 1  | 2 | 0 | 0.00221948 | 0          | 8 | 3 | 1.44210395 | 0.93173516 |
| chr1 | 41975909 | 42007004 | 31096  | 1  | 2 | 0 | 0.00493743 | 0          | 7 | 3 | 1.16581773 | 0.93173516 |
| chr1 | 42007004 | 42105619 | 98616  | 2  | 1 | 0 | 8.47E-04   | 0          | 7 | 3 | 1.62048027 | 0.93173516 |
| chr1 | 42105619 | 42146021 | 40403  | 2  | 1 | 1 | 8.47E-04   | 0.02438896 | 7 | 3 | 1.62048027 | 0.51676182 |
| chr1 | 42146021 | 42185100 | 39080  | 1  | 1 | 0 | 8.47E-04   | 0          | 7 | 2 | 1.62048027 | 0.61140001 |
| chr1 | 42185100 | 42217798 | 32699  | 1  | 1 | 0 | 0.00478973 | 0          | 5 | 2 | 1.02643191 | 0.61140001 |
| chr1 | 42217798 | 42629541 | 411744 | 8  | 1 | 1 | 0.00478973 | 0.05404976 | 2 | 2 | 1.02643191 | 0.30102999 |
| chr1 | 42629541 | 42653193 | 23653  | 2  | 1 | 1 | 0.00478973 | 0.02438896 | 5 | 3 | 1.02643191 | 0.51676182 |
| chr1 | 42653193 | 42744110 | 90918  | 2  | 1 | 1 | 0.01091641 | 0.05404976 | 4 | 2 | 0.76005302 | 0.30102999 |
| chr1 | 42744110 | 42836786 | 92677  | 3  | 1 | 1 | 0.01091641 | 0.01091641 | 4 | 4 | 0.76005302 | 0.76005302 |
| chr1 | 42836786 | 42865223 | 28438  | 2  | 1 | 2 | 0.01091641 | 0.0429175  | 4 | 4 | 0.76005302 | 0.47744371 |
| chr1 | 42865223 | 42865275 | 53     | 1  | 2 | 2 | 0.00478973 | 0.0429175  | 5 | 4 | 1.02643191 | 0.47744371 |
| chr1 | 42865275 | 42925635 | 60361  | 2  | 1 | 2 | 0.01091641 | 0.08289318 | 4 | 3 | 0.76005302 | 0.30102999 |
| chr1 | 42925635 | 43200719 | 275085 | 9  | 1 | 2 | 8.47E-04   | 0.08289318 | 7 | 3 | 1.62048027 | 0.30102999 |
| chr1 | 43200719 | 43295738 | 95020  | 4  | 1 | 2 | 0.00204627 | 0.02438896 | 6 | 3 | 1.31360226 | 0.51676182 |
| chr1 | 43295738 | 43302859 | 7122   | 2  | 1 | 2 | 0.00204627 | 0.08289318 | 6 | 3 | 1.31360226 | 0.30102999 |
| chr1 | 43302859 | 43530613 | 227755 | 3  | 1 | 1 | 0.00204627 | 0.02438896 | 6 | 3 | 1.31360226 | 0.51676182 |
| chr1 | 43530613 | 43530672 | 60     | 1  | 1 | 1 | 0.00204627 | 0.01091641 | 6 | 4 | 1.31360226 | 0.76005302 |
| chr1 | 43530672 | 43647378 | 116707 | 2  | 1 | 1 | 0.00478973 | 0.01091641 | 5 | 4 | 1.02643191 | 0.76005302 |
| chr1 | 43647378 | 43708213 | 60836  | 1  | 1 | 1 | 0.00478973 | 0.02438896 | 5 | 3 | 1.02643191 | 0.51676182 |
| chr1 | 43708213 | 43998723 | 290511 | 18 | 1 | 1 | 0.00204627 | 0.02438896 | 6 | 3 | 1.31360226 | 0.51676182 |
| chr1 | 43998723 | 44201881 | 203159 | 5  | 1 | 1 | 0.01091641 | 0.02438896 | 4 | 3 | 0.76005302 | 0.51676182 |
| chr1 | 44201881 | 44201940 | 60     | 1  | 1 | 1 | 0.00478973 | 0.02438896 | 5 | 3 | 1.02643191 | 0.51676182 |
| chr1 | 44201940 | 44361728 | 159789 | 4  | 1 | 1 | 0.01091641 | 0.02438896 | 4 | 3 | 0.76005302 | 0.51676182 |
| chr1 | 44361728 | 44615487 | 253760 | 9  | 1 | 1 | 0.01091641 | 0.01091641 | 4 | 4 | 0.76005302 | 0.76005302 |
| chr1 | 44615487 | 44784377 | 168891 | 4  | 1 | 1 | 0.00478973 | 0.01091641 | 5 | 4 | 1.02643191 | 0.76005302 |
| chr1 | 44784377 | 44784436 | 60     | 1  | 1 | 1 | 8.47E-04   | 0.01091641 | 4 | 4 | 1.62048027 | 0.76005302 |
| chr1 | 44784436 | 44859759 | 75324  | 1  | 1 | 1 | 0.00204627 | 0.02438896 | 6 | 3 | 1.31360226 | 0.51676182 |
| chr1 | 44859759 | 44859818 | 60     | 1  | 1 | 1 | 8.47E-04   | 0.02438896 | 7 | 3 | 1.62048027 | 0.51676182 |
| chr1 | 44859818 | 44952254 | 92437  | 3  | 1 | 2 | 0.00204627 | 0.02438896 | 6 | 3 | 1.31360226 | 0.51676182 |
| chr1 | 44952254 | 45050029 | 97776  | 3  | 1 | 2 | 0.00204627 | 0.08289318 | 6 | 3 | 1.31360226 | 0.30102999 |
| chr1 | 45050029 | 45050088 | 60     | 1  | 2 | 2 | 8.47E-04   | 0.08289318 | 7 | 3 | 1.62048027 | 0.30102999 |
| chr1 | 45050088 | 45179509 | 129422 | 4  | 1 | 2 | 0.00204627 | 0.08289318 | 6 | 3 | 1.31360226 | 0.30102999 |
| chr1 | 45179509 | 45242144 | 62636  | 4  | 1 | 2 | 8.47E-04   | 0.08289318 | 7 | 3 | 1.62048027 | 0.30102999 |
| chr1 | 45242144 | 45269860 | 27717  | 2  | 1 | 2 | 0.00204627 | 0.08289318 | 6 | 3 | 1.31360226 | 0.30102999 |
| chr1 | 45269860 | 45297640 | 27781  | 1  | 2 | 2 | 8.47E-04   | 0.08289318 | 7 | 3 | 1.62048027 | 0.30102999 |
| chr1 | 45297640 | 45303862 | 6223   | 2  | 2 | 2 | 0.00493743 | 0.08289318 | 7 | 3 | 1.16581773 | 0.30102999 |
| chr1 | 45303862 | 45376102 | 72241  | 3  | 2 | 2 | 0.00493743 | 0.1575501  | 7 | 2 | 1.16581773 | 0.1575501  |
| chr1 | 45376102 | 45376161 | 60     | 1  | 2 | 2 | 0.00493743 | 0.08289318 | 7 | 3 | 1.16581773 | 0.30102999 |
| chr1 | 45376161 | 45444945 | 68785  | 2  | 2 | 2 | 0.00493743 | 0.1575501  | 7 | 2 | 1.16581773 | 0.1575501  |
| chr1 | 45444945 | 45481223 | 36279  | 5  | 2 | 2 | 0.00221948 | 0.1575501  | 7 | 2 | 1.44210395 | 0.1575501  |
| chr1 | 45481223 | 45481282 | 60     | 1  | 2 | 2 | 0.00221948 | 0.08289318 | 8 | 3 | 1.44210395 | 0.30102999 |
| chr1 | 45481282 | 45562014 | 80733  | 2  | 2 | 2 | 0.00221948 | 0.1575501  | 8 | 2 | 1.44210395 | 0.1575501  |
| chr1 | 45562014 | 45562073 | 60     | 1  | 2 | 2 | 9.54E-04   | 0.1575501  | 9 | 2 | 1.74076927 | 0.1575501  |
| chr1 | 45562073 | 45793780 | 231708 | 1  | 2 | 2 | 1.30E-04   | 0.1575501  | 9 | 2 | 2.29264207 | 0.1575501  |
| chr1 | 45793780 | 45923445 | 129666 | 8  | 1 | 2 | 1.30E-04   | 0.08289318 | 9 | 3 | 2.29264207 | 0.30102999 |
| chr1 | 45923445 | 46017520 | 94076  | 4  | 2 | 2 | 9.54E-04   | 0.08289318 | 9 | 3 | 1.74076927 | 0.30102999 |
| chr1 | 46017520 | 46106046 | 88527  | 2  | 2 | 2 | 0.00221948 | 0.08289318 | 8 | 3 | 1.44210395 | 0.30102999 |
| chr1 | 46106046 | 46165590 | 59545  | 1  | 2 | 2 | 0.00493743 | 0.08289318 | 7 | 3 | 1.16581773 | 0.30102999 |
| chr1 | 46165590 | 46165889 | 300    | 2  | 2 | 2 | 0.00493743 | 0.0429175  | 7 | 4 | 1.16581773 | 0.47744371 |
| chr1 | 46165889 | 46322426 | 156538 | 1  | 2 | 2 | 8.47E-04   | 0.0429175  | 7 | 4 | 1.62048027 | 0.47744371 |
| chr1 | 46322426 | 46650642 | 328217 | 8  | 1 | 2 | 8.47E-04   | 0.08289318 | 7 | 4 | 1.62048027 | 0.30102999 |
| chr1 | 46650642 | 46671143 | 20502  | 3  | 2 | 2 | 8.47E-04   | 0.0429175  | 7 | 4 | 1.62048027 | 0.47744371 |
| chr1 | 46671143 | 46764022 | 92880  | 5  | 1 | 2 | 8.47E-04   | 0.08289318 | 7 | 3 | 1.62048027 | 0.30102999 |
| chr1 | 46764022 | 46811413 | 47392  | 2  | 1 | 1 | 8.47E-04   | 0.02438896 | 7 | 3 | 1.62048027 | 0.51676182 |
| chr1 | 46811413 | 46864607 | 53195  | 2  | 1 | 2 | 8.47E-04   | 0.08289318 | 7 | 3 | 1.62048027 | 0.30102999 |
| chr1 | 46864607 | 46910640 | 46034  | 1  | 1 | 1 | 8.47E-04   | 0.02438896 | 7 | 3 | 1.62048027 | 0.51676182 |
| chr1 | 46910640 | 47119471 | 208832 | 9  | 1 | 1 | 8.47E-04   | 0          | 7 | 3 | 1.62048027 | 0.93173516 |
| chr1 | 47119471 | 47143878 | 24408  | 2  | 1 | 1 | 8.47E-04   | 0.02438896 | 7 | 3 | 1.62048027 | 0.51676182 |
| chr1 | 47143878 | 47224171 | 80294  | 2  | 1 | 1 | 0.00204627 | 0.02438896 | 6 | 3 | 1.31360226 | 0.51676182 |
| chr1 | 47224171 | 47326538 | 102368 | 3  | 1 | 1 | 0.00478973 | 0.02438896 | 5 | 3 | 1.02643191 | 0.51676182 |
| chr1 | 47326538 | 47630162 | 303625 | 6  | 1 | 1 | 0.01091641 | 0.02438896 | 4 | 4 | 0.76005302 | 0.51676182 |
| chr1 | 47630162 | 47653590 | 23429  | 2  | 1 | 1 | 0.00478973 | 0.02438896 | 5 | 3 | 1.02643191 | 0.51676182 |
| chr1 | 47653590 | 47728629 | 75040  | 4  | 1 | 0 | 0.01091641 | 0          | 4 | 3 | 0.76005302 | 0.93173516 |

|      |          |          |        |   |   |   |            |            |   |   |            |            |
|------|----------|----------|--------|---|---|---|------------|------------|---|---|------------|------------|
| chr1 | 50087773 | 50193502 | 105730 | 2 | 1 | 1 | 0.02438896 | 0.05404976 | 3 | 2 | 0.51676182 | 0.30102999 |
| chr1 | 50193502 | 50251479 | 57978  | 1 | 1 | 0 | 0.05404976 | 0          | 2 | 1 | 0.30102999 | 0.30102999 |
| chr1 | 50251479 | 50304991 | 53513  | 2 | 1 | 0 | 0.01091641 | 0          | 4 | 1 | 0.76005302 | 0.30102999 |
| chr1 | 50304991 | 50305050 | 60     | 1 | 1 | 0 | 0.00478973 | 0          | 5 | 1 | 1.02643191 | 0.30102999 |
| chr1 | 50305050 | 50419450 | 114401 | 2 | 1 | 0 | 0.02438896 | 0          | 3 | 1 | 0.51676182 | 0.30102999 |
| chr1 | 50419450 | 50484358 | 64909  | 2 | 1 | 0 | 0.01091641 | 0          | 4 | 1 | 0.76005302 | 0.30102999 |
| chr1 | 50484358 | 50607503 | 123146 | 4 | 1 | 0 | 0.00478973 | 0          | 5 | 1 | 1.02643191 | 0.30102999 |
| chr1 | 50607503 | 50610664 | 3162   | 2 | 1 | 0 | 0.00204627 | 0          | 6 | 1 | 1.31360226 | 0.30102999 |
| chr1 | 50610664 | 50666998 | 56335  | 1 | 1 | 0 | 0.00478973 | 0          | 5 | 1 | 1.02643191 | 0.30102999 |
| chr1 | 50666998 | 50732062 | 65065  | 1 | 1 | 0 | 0.00478973 | 0          | 5 | 0 | 1.02643191 | 0          |
| chr1 | 50732062 | 50817322 | 85261  | 2 | 1 | 0 | 0.00204627 | 0          | 6 | 0 | 1.31360226 | 0          |
| chr1 | 50817322 | 51073201 | 255880 | 6 | 1 | 0 | 0.00204627 | 0          | 6 | 1 | 1.31360226 | 0.30102999 |
| chr1 | 51073201 | 51134787 | 61587  | 1 | 1 | 0 | 0.00478973 | 0          | 5 | 1 | 1.02643191 | 0.30102999 |
| chr1 | 51134787 | 51204584 | 69798  | 1 | 1 | 0 | 0.00478973 | 0          | 5 | 0 | 1.02643191 | 0          |
| chr1 | 51204584 | 51267338 | 62755  | 2 | 1 | 0 | 0.00204627 | 0          | 6 | 0 | 1.31360226 | 0          |
| chr1 | 51267338 | 51295690 | 28353  | 1 | 1 | 0 | 0.00478973 | 0          | 5 | 0 | 1.02643191 | 0          |
| chr1 | 51295690 | 51295749 | 60     | 1 | 1 | 0 | 0.00204627 | 0          | 6 | 0 | 1.31360226 | 0          |
| chr1 | 51295749 | 51368914 | 73166  | 1 | 1 | 0 | 0.01091641 | 0          | 4 | 0 | 0.76005302 | 0          |
| chr1 | 51368914 | 51421960 | 53047  | 2 | 1 | 0 | 0.00478973 | 0          | 5 | 0 | 1.02643191 | 0          |
| chr1 | 51421960 | 51437689 | 15730  | 1 | 1 | 0 | 8.47E-04   | 0          | 7 | 0 | 1.62048027 | 0          |
| chr1 | 51437689 | 51639403 | 201715 | 3 | 1 | 0 | 0.00204627 | 0          | 6 | 0 | 1.31360226 | 0          |
| chr1 | 51639403 | 51703676 | 64274  | 2 | 1 | 0 | 0.00204627 | 0          | 6 | 2 | 1.31360226 | 0.61140001 |
| chr1 | 51703676 | 51826867 | 123192 | 2 | 1 | 0 | 0.00204627 | 0          | 6 | 1 | 1.31360226 | 0.30102999 |
| chr1 | 51826867 | 51972508 | 145642 | 5 | 1 | 0 | 0.00204627 | 0          | 6 | 2 | 1.31360226 | 0.61140001 |
| chr1 | 51972508 | 52135114 | 162607 | 4 | 1 | 1 | 0.00204627 | 0.05404976 | 6 | 2 | 1.31360226 | 0.30102999 |
| chr1 | 52135114 | 52135169 | 56     | 1 | 1 | 0 | 0.01053319 | 0.05404976 | 6 | 2 | 0.91219088 | 0.30102999 |
| chr1 | 52135169 | 52179686 | 44518  | 1 | 1 | 1 | 0.00204627 | 0.05404976 | 6 | 2 | 1.31360226 | 0.30102999 |
| chr1 | 52179686 | 52542215 | 74530  | 2 | 1 | 1 | 8.47E-04   | 0.05404976 | 7 | 2 | 1.62048027 | 0.30102999 |
| chr1 | 52542215 | 52385262 | 131048 | 5 | 2 | 1 | 0.00493743 | 0.05404976 | 7 | 2 | 1.16581773 | 0.30102999 |
| chr1 | 52385262 | 52385321 | 60     | 1 | 3 | 1 | 0.01598258 | 0.05404976 | 7 | 2 | 0.84395715 | 0.30102999 |
| chr1 | 52385321 | 52467725 | 82405  | 2 | 2 | 1 | 0.00493743 | 0.1218695  | 7 | 1 | 1.16581773 | 0.1218695  |
| chr1 | 52467725 | 52564775 | 97051  | 3 | 1 | 1 | 8.47E-04   | 0.1218695  | 7 | 1 | 1.62048027 | 0.1218695  |
| chr1 | 52564775 | 52564834 | 60     | 1 | 2 | 1 | 0.00493743 | 0.1218695  | 7 | 1 | 1.16581773 | 0.1218695  |
| chr1 | 52564834 | 52632041 | 67208  | 1 | 2 | 1 | 0.01053319 | 0.1218695  | 6 | 1 | 0.91219088 | 0.1218695  |
| chr1 | 52632041 | 52682108 | 50068  | 2 | 2 | 1 | 0.01053319 | 0.05404976 | 6 | 2 | 0.91219088 | 0.30102999 |
| chr1 | 52682108 | 52703591 | 21484  | 2 | 2 | 1 | 0.00493743 | 0.05404976 | 7 | 2 | 1.16581773 | 0.30102999 |
| chr1 | 52703591 | 53104025 | 400435 | 8 | 2 | 1 | 0.01053319 | 0.05404976 | 6 | 2 | 0.91219088 | 0.30102999 |
| chr1 | 53104025 | 53162174 | 58150  | 3 | 3 | 1 | 0.03070643 | 0.05404976 | 6 | 2 | 0.63695542 | 0.30102999 |
| chr1 | 53162174 | 53162233 | 60     | 1 | 3 | 1 | 0.01598258 | 0.05404976 | 7 | 2 | 0.84395715 | 0.30102999 |
| chr1 | 53162233 | 53246226 | 83994  | 2 | 2 | 1 | 0.01053319 | 0.05404976 | 6 | 2 | 0.91219088 | 0.30102999 |
| chr1 | 53246226 | 53246285 | 60     | 1 | 3 | 1 | 0.01598258 | 0.05404976 | 7 | 2 | 0.84395715 | 0.30102999 |
| chr1 | 53246285 | 53293068 | 46784  | 1 | 3 | 1 | 0.00204627 | 0.05404976 | 6 | 2 | 1.31360226 | 0.30102999 |
| chr1 | 53293068 | 53366252 | 73185  | 2 | 2 | 2 | 0.00204627 | 0.1575501  | 6 | 2 | 1.31360226 | 0.1575501  |
| chr1 | 53366252 | 53371432 | 5181   | 3 | 2 | 2 | 0.00493743 | 0.1575501  | 7 | 2 | 1.16581773 | 0.1575501  |
| chr1 | 53371432 | 53395707 | 24276  | 1 | 2 | 2 | 8.47E-04   | 0.1575501  | 7 | 2 | 1.62048027 | 0.1575501  |
| chr1 | 53395707 | 53427174 | 31468  | 2 | 2 | 2 | 0.00493743 | 0.1575501  | 7 | 2 | 1.16581773 | 0.1575501  |
| chr1 | 53427174 | 53427232 | 59     | 1 | 3 | 2 | 0.01598258 | 0.1575501  | 7 | 2 | 0.84395715 | 0.1575501  |
| chr1 | 53427232 | 53493769 | 66538  | 1 | 2 | 2 | 8.47E-04   | 0.1575501  | 7 | 2 | 1.62048027 | 0.1575501  |
| chr1 | 53493769 | 53643189 | 149421 | 6 | 2 | 2 | 0.00204627 | 0.1575501  | 6 | 2 | 1.31360226 | 0.1575501  |
| chr1 | 53643189 | 53701905 | 58717  | 5 | 2 | 2 | 0.01053319 | 0.1575501  | 6 | 2 | 0.91219088 | 0.1575501  |
| chr1 | 53701905 | 53763468 | 61564  | 2 | 2 | 2 | 0.00204627 | 0.1575501  | 6 | 2 | 1.31360226 | 0.1575501  |
| chr1 | 53763468 | 53897468 | 134001 | 3 | 1 | 2 | 0.00204627 | 0.0828918  | 6 | 3 | 1.31360226 | 0.30102999 |
| chr1 | 53897468 | 54108906 | 211439 | 7 | 1 | 3 | 0.00204627 | 0.17593012 | 6 | 3 | 1.31360226 | 0.17593012 |
| chr1 | 54108906 | 54199792 | 90887  | 2 | 1 | 3 | 0.00478973 | 0.17593012 | 5 | 3 | 1.02643191 | 0.17593012 |
| chr1 | 54199792 | 54199845 | 54     | 1 | 3 | 3 | 0.00204627 | 0.17593012 | 6 | 3 | 1.31360226 | 0.17593012 |
| chr1 | 54199845 | 54252893 | 53049  | 3 | 1 | 3 | 0.00478973 | 0.17593012 | 5 | 3 | 1.02643191 | 0.17593012 |
| chr1 | 54252893 | 54324951 | 72059  | 3 | 1 | 3 | 0.00478973 | 0.10122019 | 5 | 4 | 1.02643191 | 0.30102999 |
| chr1 | 54324951 | 54376677 | 51727  | 3 | 1 | 3 | 0.00204627 | 0.10122019 | 6 | 4 | 1.31360226 | 0.30102999 |
| chr1 | 54376677 | 54421881 | 45205  | 4 | 1 | 3 | 0.00204627 | 0.05670724 | 5 | 5 | 1.31360226 | 0.45545077 |
| chr1 | 54421881 | 54505441 | 83561  | 2 | 1 | 3 | 0.00478973 | 0.05670724 | 5 | 5 | 1.02643191 | 0.45545077 |
| chr1 | 54505441 | 54512973 | 7533   | 2 | 1 | 3 | 0.00204627 | 0.05670724 | 6 | 5 | 1.31360226 | 0.45545077 |
| chr1 | 54512973 | 54534566 | 21594  | 1 | 1 | 3 | 0.00478973 | 0.05670724 | 5 | 5 | 1.02643191 | 0.45545077 |
| chr1 | 54534566 | 54577664 | 43099  | 1 | 2 | 2 | 0.01091641 | 0.02162467 | 4 | 5 | 0.76005302 | 0.68214471 |
| chr1 | 54577664 | 54577723 | 60     | 1 | 2 | 2 | 0.00478973 | 0.02162467 | 5 | 5 | 1.02643191 | 0.68214471 |
| chr1 | 54577723 | 54673152 | 95430  | 2 | 1 | 2 | 0.00478973 | 0.0429175  | 5 | 4 | 1.02643191 | 0.47744371 |
| chr1 | 54673152 | 54748969 | 75818  | 1 | 2 | 3 | 0.00478973 | 0.01091641 | 4 | 4 | 1.02643191 | 0.76005302 |
| chr1 | 54748969 | 54749038 | 60     | 1 | 1 | 1 | 0.00204627 | 0.01091641 | 6 | 1 | 1.31360226 | 0.76005302 |
| chr1 | 54749038 | 54832143 | 83116  | 2 | 1 | 1 | 0.00478973 | 0.01091641 | 5 | 4 | 1.02643191 | 0.76005302 |
| chr1 | 54832143 | 54832202 | 60     | 1 | 2 | 5 | 0.00478973 | 0.0429175  | 5 | 4 | 1.02643191 | 0.47744371 |
| chr1 | 54832202 | 54869282 | 37081  | 1 | 1 | 1 | 0.00478973 | 0.01091641 | 5 | 4 | 1.02643191 | 0.76005302 |
| chr1 | 54869282 | 55134060 | 264779 | 6 | 1 | 2 | 0.01091641 | 0.01091641 | 4 | 4 | 0.76005302 | 0.76005302 |
| chr1 | 55134060 | 55134119 | 60     | 1 | 1 | 1 | 0.01091641 | 0.00478973 | 4 | 5 | 0.76005302 | 1.02643191 |
| chr1 | 55134119 | 55183468 | 49350  | 1 | 1 | 1 | 0.01091641 | 0.01091641 | 4 | 4 | 0.76005302 | 0.76005302 |
| chr1 | 55183468 | 55252418 | 68951  | 5 | 1 | 1 | 0.00478973 | 0.01091641 | 5 | 4 | 1.02643191 | 0.76005302 |
| chr1 | 55252418 | 5538790  | 86373  | 3 | 1 | 1 | 0.01091641 | 0.01091641 | 4 | 4 | 0.76005302 | 0.76005302 |
| chr1 | 5538790  | 55465890 | 127101 | 3 | 0 | 1 | 0          | 0.01091641 | 4 | 4 | 1.26272838 | 0.76005302 |
| chr1 | 55465890 | 55636899 | 171010 | 4 | 1 | 0 | 0          | 0.05404976 | 4 | 2 | 1.26272838 | 0.30102999 |
| chr1 | 55636899 | 55709778 | 72880  | 3 | 0 | 1 | 0          | 0.02438896 | 4 | 3 | 1.26272838 | 0.51676182 |
| chr1 | 55709778 | 55848004 | 138227 | 3 | 0 | 1 | 0          | 0.02438896 | 3 | 3 | 0.93173516 | 0.51676182 |
| chr1 | 55848004 | 56001939 | 153936 | 2 | 0 | 1 | 0          | 0.05404976 | 3 | 2 | 0.93173516 | 0.30102999 |
| chr1 | 56001939 | 56001998 | 60     | 1 | 0 | 1 | 0          | 0.02438896 | 3 | 3 | 0.93173516 | 0.51676182 |
| chr1 | 56001998 | 56084805 | 82808  | 1 | 0 | 1 | 0          | 0.05404976 | 3 | 2 | 0.93173516 | 0.30102999 |
| chr1 | 56084805 | 56137547 | 52743  | 2 | 0 | 1 | 0          | 0.05404976 | 2 | 2 | 1.26272838 | 0.30102999 |
| chr1 | 56137547 | 56193319 | 55773  | 2 | 1 | 1 | 0.01091641 | 0.05404976 | 4 | 2 | 0.76005302 | 0.30102999 |
| chr1 | 56193319 | 56299437 | 106119 | 1 | 1 | 1 | 0.01091641 | 0.1218695  | 4 | 1 | 0.76005302 | 0.1218695  |
| chr1 | 56299437 | 56429654 | 130218 | 1 | 1 | 1 | 0.05404976 | 0.1218695  | 2 | 1 | 0.30102999 | 0.1218695  |
| chr1 | 56429654 | 56591530 | 161877 | 1 | 0 | 1 | 0          | 0.1218695  | 2 | 1 | 0.61140001 | 0.1218695  |
| chr1 | 56591530 | 56591589 | 60     | 1 | 1 | 0 | 0          | 0.05404976 | 3 | 2 | 0.93173516 | 0.30102999 |
| chr1 | 56591589 | 56911268 | 319680 | 2 | 0 | 1 | 0          | 0.1218695  | 3 | 1 | 0.93173516 | 0.1218695  |
| chr1 | 56911268 | 56911327 | 60     | 1 | 0 | 2 | 0          | 0.1575501  | 3 | 2 | 0.93173516 | 0.1575501  |
| chr1 | 56911327 | 56960896 | 49570  | 1 | 0 | 2 | 0          | 0.1575501  | 2 | 2 | 0.61140001 | 0.1575501  |
| chr1 | 56960896 | 57006286 | 45391  | 2 | 1 | 2 | 0.05404976 | 0.1575501  | 2 | 2 | 0.30102999 | 0.1575501  |
| chr1 | 57006286 | 57119876 | 113591 | 5 | 1 | 2 | 0.05404976 | 0.0828918  | 3 | 3 | 0.30102999 | 0.30102999 |
| chr1 |          |          |        |   |   |   |            |            |   |   |            |            |

|      |          |          |        |    |   |   |            |            |   |   |            |            |
|------|----------|----------|--------|----|---|---|------------|------------|---|---|------------|------------|
| chr1 | 60235062 | 60568797 | 333736 | 8  | 1 | 2 | 0.1218695  | 0.61140001 | 1 | 0 | 0.1218695  | 0          |
| chr1 | 60568797 | 60719746 | 150950 | 2  | 1 | 3 | 0.05404976 | 0.93173516 | 2 | 0 | 0.30102999 | 0          |
| chr1 | 60719746 | 60719805 | 60     | 1  | 1 | 3 | 0.01091641 | 0.30102999 | 4 | 2 | 0.76005302 | 0.08289318 |
| chr1 | 60719805 | 60907458 | 187654 | 1  | 2 | 2 | 0.01091641 | 0.61140001 | 4 | 0 | 0.76005302 | 0          |
| chr1 | 60907458 | 60997806 | 90349  | 2  | 1 | 2 | 0.00204627 | 0.61140001 | 6 | 0 | 1.31360226 | 0          |
| chr1 | 60997806 | 61162108 | 164303 | 2  | 1 | 2 | 0.00478973 | 0.61140001 | 5 | 0 | 1.02643191 | 0          |
| chr1 | 61162108 | 61280688 | 118581 | 3  | 1 | 2 | 0.00204627 | 0.61140001 | 6 | 0 | 1.31360226 | 0          |
| chr1 | 61280688 | 61280747 | 60     | 1  | 1 | 2 | 0.00204627 | 0.1575501  | 6 | 2 | 1.31360226 | 0.1575501  |
| chr1 | 61280747 | 61353663 | 72917  | 1  | 1 | 2 | 0.00204627 | 0.30102999 | 6 | 1 | 1.31360226 | 0.05404976 |
| chr1 | 61353663 | 61417247 | 63585  | 1  | 1 | 2 | 0.00478973 | 0.30102999 | 5 | 1 | 1.02643191 | 0.05404976 |
| chr1 | 61417247 | 61485099 | 67853  | 1  | 1 | 2 | 0.00478973 | 0.61140001 | 5 | 0 | 1.02643191 | 0          |
| chr1 | 61485099 | 61485158 | 60     | 1  | 1 | 2 | 0.00204627 | 0.61140001 | 6 | 0 | 1.31360226 | 0          |
| chr1 | 61485158 | 61557457 | 72300  | 2  | 1 | 1 | 0.00204627 | 0.30102999 | 6 | 0 | 1.31360226 | 0          |
| chr1 | 61557457 | 62518529 | 961073 | 20 | 2 | 1 | 0.01053319 | 0.30102999 | 6 | 0 | 0.91219088 | 0          |
| chr1 | 62518529 | 62580114 | 61586  | 2  | 1 | 1 | 0.01053319 | 0.1218695  | 6 | 1 | 0.91219088 | 0.1218695  |
| chr1 | 62580114 | 62863202 | 283089 | 4  | 1 | 1 | 0.00204627 | 0.30102999 | 6 | 0 | 1.31360226 | 0          |
| chr1 | 62863202 | 62910630 | 47429  | 1  | 1 | 0 | 0.00204627 | 0.00204627 | 6 | 0 | 1.31360226 | 0          |
| chr1 | 62910630 | 63159347 | 248718 | 7  | 1 | 0 | 0.00204627 | 0.00204627 | 6 | 1 | 1.31360226 | 0.30102999 |
| chr1 | 63159347 | 63250454 | 91108  | 2  | 2 | 0 | 0.01053319 | 0.01053319 | 6 | 1 | 0.91219088 | 0.30102999 |
| chr1 | 63250454 | 63307081 | 56628  | 1  | 2 | 0 | 0.02162467 | 0.02162467 | 5 | 1 | 0.68214471 | 0.30102999 |
| chr1 | 63307081 | 63307140 | 60     | 1  | 2 | 0 | 0.01053319 | 0.01053319 | 6 | 1 | 0.91219088 | 0.30102999 |
| chr1 | 63307140 | 63353105 | 45966  | 2  | 1 | 0 | 0.00204627 | 0.00204627 | 6 | 0 | 1.31360226 | 0          |
| chr1 | 63353105 | 63353164 | 60     | 1  | 1 | 0 | 8.47E-04   | 0          | 7 | 0 | 1.62048027 | 0.30102999 |
| chr1 | 63353164 | 63654978 | 301815 | 2  | 1 | 0 | 0.00204627 | 0.00204627 | 6 | 1 | 1.31360226 | 0.30102999 |
| chr1 | 63654978 | 63684743 | 29766  | 2  | 1 | 2 | 0.00204627 | 0.1575501  | 6 | 2 | 1.31360226 | 0.1575501  |
| chr1 | 63684743 | 63791203 | 106461 | 3  | 1 | 3 | 0.00204627 | 0.30102999 | 6 | 2 | 1.31360226 | 0.08289318 |
| chr1 | 63791203 | 63836529 | 45327  | 1  | 1 | 3 | 0.00478973 | 0.30102999 | 5 | 2 | 1.02643191 | 0.08289318 |
| chr1 | 63836529 | 63894700 | 58172  | 1  | 1 | 0 | 0.00478973 | 0.00478973 | 5 | 2 | 1.02643191 | 0.61140001 |
| chr1 | 63894700 | 63945809 | 51110  | 2  | 1 | 0 | 0.00204627 | 0.00204627 | 6 | 2 | 1.31360226 | 0.61140001 |
| chr1 | 63945809 | 63945868 | 60     | 1  | 1 | 2 | 0.00204627 | 0.1575501  | 6 | 2 | 1.31360226 | 0.1575501  |
| chr1 | 63945868 | 63986935 | 41068  | 1  | 1 | 2 | 0.00478973 | 0.1575501  | 5 | 2 | 1.02643191 | 0.1575501  |
| chr1 | 63986935 | 64011651 | 24717  | 1  | 1 | 1 | 0.00478973 | 0.1218695  | 5 | 1 | 1.02643191 | 0.1218695  |
| chr1 | 64011651 | 64020995 | 9345   | 1  | 1 | 1 | 0.00478973 | 0.30102999 | 5 | 0 | 1.02643191 | 0          |
| chr1 | 64020995 | 64021054 | 60     | 1  | 1 | 2 | 0.00478973 | 0.30102999 | 5 | 1 | 1.02643191 | 0.05404976 |
| chr1 | 64021054 | 64125397 | 104344 | 2  | 1 | 2 | 0.00478973 | 0.61140001 | 5 | 0 | 1.02643191 | 0          |
| chr1 | 64125397 | 64156739 | 31343  | 2  | 1 | 3 | 0.00478973 | 0.30102999 | 5 | 2 | 1.02643191 | 0.08289318 |
| chr1 | 64156739 | 64249068 | 92330  | 1  | 1 | 2 | 0.00478973 | 0.1575501  | 5 | 2 | 1.02643191 | 0.1575501  |
| chr1 | 64249068 | 64360282 | 111215 | 2  | 1 | 2 | 0.00478973 | 0.30102999 | 5 | 1 | 1.02643191 | 0.05404976 |
| chr1 | 64360282 | 64474992 | 114711 | 3  | 1 | 2 | 0.00478973 | 0.1575501  | 5 | 2 | 1.02643191 | 0.1575501  |
| chr1 | 64474992 | 64901143 | 426152 | 9  | 2 | 1 | 0.01053319 | 0.1575501  | 6 | 2 | 0.91219088 | 0.1575501  |
| chr1 | 64901143 | 64948870 | 47728  | 2  | 2 | 2 | 0.01053319 | 0.47744371 | 6 | 2 | 0.91219088 | 0.0429175  |
| chr1 | 64948870 | 65016263 | 67394  | 2  | 2 | 4 | 0.01262467 | 0.47744371 | 5 | 2 | 0.68214471 | 0.0429175  |
| chr1 | 65016263 | 65016322 | 60     | 1  | 2 | 4 | 0.02162467 | 0.30102999 | 5 | 3 | 0.68214471 | 0.10122019 |
| chr1 | 65016322 | 65068470 | 52149  | 1  | 1 | 4 | 0.00478973 | 0.47744371 | 5 | 2 | 1.02643191 | 0.0429175  |
| chr1 | 65068470 | 65098061 | 29592  | 2  | 1 | 4 | 0.00204627 | 0.47744371 | 6 | 2 | 1.31360226 | 0.0429175  |
| chr1 | 65098061 | 65098120 | 60     | 1  | 2 | 4 | 0.01053319 | 0.47744371 | 6 | 2 | 0.91219088 | 0.0429175  |
| chr1 | 65098120 | 65218480 | 120361 | 2  | 1 | 3 | 0.00478973 | 0.30102999 | 5 | 2 | 1.02643191 | 0.08289318 |
| chr1 | 65218480 | 65218539 | 60     | 1  | 1 | 2 | 0.01053319 | 0.30102999 | 6 | 2 | 0.91219088 | 0.08289318 |
| chr1 | 65218539 | 65255117 | 36579  | 2  | 2 | 3 | 0.02162467 | 0.30102999 | 5 | 2 | 0.68214471 | 0.08289318 |
| chr1 | 65255117 | 65281966 | 26850  | 1  | 2 | 4 | 0.02162467 | 0.30102999 | 5 | 3 | 0.68214471 | 0.10122019 |
| chr1 | 65281966 | 65349103 | 67138  | 1  | 1 | 4 | 0.00478973 | 0.30102999 | 5 | 2 | 1.02643191 | 0.10122019 |
| chr1 | 65349103 | 65461918 | 112816 | 4  | 1 | 4 | 0.00478973 | 0.18734596 | 5 | 4 | 1.02643191 | 0.18734596 |
| chr1 | 65461918 | 65626868 | 164951 | 4  | 1 | 2 | 0.00478973 | 0.1575501  | 5 | 2 | 1.02643191 | 0.1575501  |
| chr1 | 65626868 | 65709538 | 82671  | 3  | 2 | 2 | 0.02162467 | 0.1575501  | 5 | 2 | 0.68214471 | 0.1575501  |
| chr1 | 65709538 | 65764893 | 55356  | 2  | 1 | 2 | 0.00478973 | 0.1575501  | 5 | 2 | 1.02643191 | 0.1575501  |
| chr1 | 65764893 | 65854982 | 90090  | 2  | 1 | 2 | 0.00478973 | 0.30102999 | 5 | 1 | 1.02643191 | 0.05404976 |
| chr1 | 65854982 | 65887445 | 32464  | 2  | 2 | 2 | 0.02162467 | 0.1575501  | 5 | 2 | 0.68214471 | 0.1575501  |
| chr1 | 65887445 | 66036463 | 149019 | 3  | 1 | 2 | 0.00478973 | 0.1575501  | 5 | 2 | 1.02643191 | 0.1575501  |
| chr1 | 66036463 | 66099329 | 62867  | 1  | 1 | 1 | 0.01091641 | 0.05404976 | 4 | 2 | 0.76005302 | 0.30102999 |
| chr1 | 66099329 | 66099388 | 60     | 1  | 3 | 1 | 0.10122019 | 0.05404976 | 4 | 2 | 0.30102999 | 0.30102999 |
| chr1 | 66099388 | 66172315 | 72928  | 1  | 3 | 0 | 0.10122019 | 0          | 4 | 2 | 0.61140001 | 0.30102999 |
| chr1 | 66172315 | 66221653 | 49339  | 2  | 3 | 0 | 0.03070643 | 0          | 6 | 2 | 0.63695542 | 0.61140001 |
| chr1 | 66221653 | 66221712 | 60     | 1  | 1 | 1 | 0.03070643 | 0.05404976 | 6 | 2 | 0.63695542 | 0.30102999 |
| chr1 | 66221712 | 66333375 | 111664 | 2  | 1 | 0 | 0.00478973 | 0.00478973 | 5 | 2 | 1.02643191 | 0.61140001 |
| chr1 | 66333375 | 66379014 | 45640  | 2  | 2 | 0 | 0.05670724 | 0          | 5 | 2 | 0.45545077 | 0.61140001 |
| chr1 | 66379014 | 66497377 | 118364 | 2  | 0 | 0 | 0.02162467 | 0          | 5 | 2 | 0.68214471 | 0.61140001 |
| chr1 | 66497377 | 66549455 | 52079  | 1  | 2 | 0 | 0.0429175  | 0          | 4 | 2 | 0.47744371 | 0.61140001 |
| chr1 | 66549455 | 66619477 | 70023  | 2  | 2 | 1 | 0.0429175  | 0.05404976 | 4 | 4 | 0.47744371 | 0.30102999 |
| chr1 | 66619477 | 66685095 | 65619  | 1  | 2 | 1 | 0.08289318 | 0.05404976 | 3 | 2 | 0.30102999 | 0.30102999 |
| chr1 | 66685095 | 66685154 | 60     | 1  | 3 | 1 | 0.10122019 | 0.05404976 | 4 | 2 | 0.30102999 | 0.30102999 |
| chr1 | 66685154 | 66716728 | 31575  | 1  | 3 | 1 | 0.17593012 | 0.05404976 | 3 | 2 | 0.17593012 | 0.30102999 |
| chr1 | 66716728 | 66716787 | 60     | 1  | 4 | 1 | 0.18734596 | 0.05404976 | 4 | 2 | 0.18734596 | 0.30102999 |
| chr1 | 66716787 | 66773257 | 56471  | 1  | 3 | 0 | 0.10122019 | 0          | 4 | 2 | 0.30102999 | 0.61140001 |
| chr1 | 66773257 | 66806578 | 33322  | 2  | 3 | 0 | 0.05670724 | 0          | 5 | 2 | 0.45545077 | 0.61140001 |
| chr1 | 66806578 | 66840093 | 33516  | 3  | 1 | 1 | 0.05670724 | 0.05404976 | 5 | 2 | 0.45545077 | 0.30102999 |
| chr1 | 66840093 | 66840152 | 60     | 1  | 4 | 1 | 0.11390336 | 0.05404976 | 5 | 2 | 0.30102999 | 0.30102999 |
| chr1 | 66840152 | 66943592 | 103441 | 1  | 3 | 1 | 0.05670724 | 0.05404976 | 5 | 2 | 0.45545077 | 0.30102999 |
| chr1 | 66943592 | 66943651 | 60     | 1  | 4 | 1 | 0.11390336 | 0.05404976 | 5 | 2 | 0.30102999 | 0.30102999 |
| chr1 | 66943651 | 67148594 | 204944 | 4  | 1 | 1 | 0.18734596 | 0.05404976 | 4 | 2 | 0.18734596 | 0.30102999 |
| chr1 | 67148594 | 67263482 | 114889 | 3  | 3 | 1 | 0.10122019 | 0.05404976 | 4 | 2 | 0.30102999 | 0.30102999 |
| chr1 | 67263482 | 67263541 | 60     | 1  | 3 | 2 | 0.10122019 | 0.1575501  | 4 | 2 | 0.30102999 | 0.1575501  |
| chr1 | 67263541 | 67291225 | 27685  | 1  | 3 | 1 | 0.10122019 | 0.05404976 | 4 | 2 | 0.30102999 | 0.30102999 |
| chr1 | 67291225 | 67299300 | 8076   | 2  | 3 | 1 | 0.05670724 | 0.05404976 | 5 | 2 | 0.45545077 | 0.30102999 |
| chr1 | 67299300 | 67423725 | 124426 | 3  | 3 | 1 | 0.10122019 | 0.05404976 | 4 | 2 | 0.30102999 | 0.30102999 |
| chr1 | 67423725 | 67423784 | 60     | 1  | 3 | 1 | 0.05670724 | 0.05404976 | 5 | 2 | 0.45545077 | 0.30102999 |
| chr1 | 67423784 | 67510466 | 86683  | 2  | 3 | 1 | 0.10122019 | 0.05404976 | 4 | 2 | 0.30102999 | 0.30102999 |
| chr1 | 67510466 | 67559899 | 49434  | 2  | 2 | 1 | 0.0429175  | 0.05404976 | 4 | 2 | 0.47744371 | 0.30102999 |
| chr1 | 67559899 | 67559958 | 60     | 1  | 3 | 2 | 0.10122019 | 0.1575501  | 4 | 2 | 0.30102999 | 0.1575501  |
| chr1 | 67559958 | 67635084 | 75127  | 1  | 2 | 1 | 0.0429175  | 0.1575501  | 4 | 2 | 0.47744371 | 0.1575501  |
| chr1 | 67635084 | 67721572 | 86489  | 3  | 2 | 4 | 0.0429175  | 0.30102999 | 4 | 3 | 0.47744371 | 0.10122019 |
| chr1 | 67721572 | 67721631 | 60     | 1  | 2 | 4 | 0.02162467 | 0.30102999 | 5 | 3 | 0.68214471 | 0.10122019 |
| chr1 | 67721631 | 67845644 | 124014 | 4  | 2 | 4 | 0.0429175  |            |   |   |            |            |

|      |          |          |        |   |   |   |            |            |   |   |            |            |
|------|----------|----------|--------|---|---|---|------------|------------|---|---|------------|------------|
| chr1 | 71996503 | 71996562 | 60     | 1 | 0 | 3 | 0          | 0.17593012 | 3 | 3 | 0.93173516 | 0.17593012 |
| chr1 | 71996562 | 72207033 | 210472 | 4 | 0 | 3 | 0          | 0.30102999 | 3 | 2 | 0.93173516 | 0.08289318 |
| chr1 | 72207033 | 72292088 | 85056  | 3 | 0 | 3 | 0          | 0.17593012 | 3 | 3 | 0.93173516 | 0.17593012 |
| chr1 | 72292088 | 72380292 | 88205  | 2 | 0 | 3 | 0          | 0.30102999 | 3 | 2 | 0.93173516 | 0.08289318 |
| chr1 | 72380292 | 72523905 | 143614 | 3 | 0 | 3 | 0          | 0.17593012 | 3 | 3 | 0.93173516 | 0.17593012 |
| chr1 | 72523905 | 72667496 | 143592 | 3 | 0 | 2 | 0          | 0.1755501  | 3 | 2 | 0.93173516 | 0.1755501  |
| chr1 | 72667496 | 72667555 | 60     | 1 | 0 | 2 | 0          | 0.08289318 | 3 | 3 | 0.93173516 | 0.30102999 |
| chr1 | 72667555 | 72992971 | 325417 | 3 | 0 | 2 | 0          | 0.1755501  | 3 | 2 | 0.93173516 | 0.1755501  |
| chr1 | 72992971 | 72993030 | 60     | 1 | 0 | 3 | 0          | 0.30102999 | 3 | 2 | 0.93173516 | 0.08289318 |
| chr1 | 72993030 | 73309668 | 316639 | 2 | 0 | 1 | 0          | 0.30102999 | 3 | 0 | 0.93173516 | 0          |
| chr1 | 73309668 | 73309727 | 60     | 1 | 0 | 1 | 0          | 0.1218695  | 3 | 1 | 0.93173516 | 0.1218695  |
| chr1 | 73309727 | 73628814 | 319088 | 2 | 0 | 1 | 0          | 0.30102999 | 2 | 0 | 0.6114001  | 0          |
| chr1 | 73628814 | 73628873 | 60     | 1 | 1 | 1 | 0.05404976 | 0.1218695  | 2 | 1 | 0.30102999 | 0.1218695  |
| chr1 | 73628873 | 73739318 | 110446 | 1 | 0 | 1 | 0          | 0.1218695  | 2 | 1 | 0.6114001  | 0.1218695  |
| chr1 | 73739318 | 73908968 | 169651 | 2 | 0 | 2 | 0          | 0.1755501  | 3 | 2 | 0.93173516 | 0.1755501  |
| chr1 | 73908968 | 73909027 | 60     | 1 | 0 | 4 | 0          | 0.30102999 | 3 | 3 | 0.93173516 | 0.10122019 |
| chr1 | 73909027 | 74298462 | 389436 | 3 | 0 | 2 | 0          | 0.08289318 | 3 | 3 | 0.93173516 | 0.30102999 |
| chr1 | 74298462 | 74298521 | 60     | 1 | 1 | 2 | 0.02438896 | 0.08289318 | 3 | 3 | 0.51676182 | 0.30102999 |
| chr1 | 74298521 | 74425862 | 127342 | 1 | 0 | 2 | 0          | 0.08289318 | 3 | 3 | 0.93173516 | 0.30102999 |
| chr1 | 74425862 | 74605861 | 181000 | 3 | 0 | 2 | 0          | 0.1755501  | 3 | 2 | 0.93173516 | 0.1755501  |
| chr1 | 74605861 | 74654147 | 47287  | 1 | 0 | 2 | 0          | 0.30102999 | 3 | 1 | 0.93173516 | 0.05404976 |
| chr1 | 74654147 | 74672597 | 18451  | 2 | 0 | 2 | 0          | 0.1755501  | 3 | 2 | 0.93173516 | 0.1755501  |
| chr1 | 74672597 | 74763993 | 91387  | 3 | 0 | 2 | 0          | 0.08289318 | 3 | 3 | 0.93173516 | 0.30102999 |
| chr1 | 74763993 | 75060461 | 296469 | 6 | 0 | 2 | 0          | 0.1755501  | 3 | 2 | 0.93173516 | 0.1755501  |
| chr1 | 75060461 | 75122210 | 61750  | 1 | 0 | 2 | 0          | 0.1755501  | 2 | 2 | 0.6114001  | 0.1755501  |
| chr1 | 75122210 | 75172840 | 50631  | 3 | 0 | 2 | 0          | 0.0429175  | 2 | 4 | 0.6114001  | 0.47744371 |
| chr1 | 75172840 | 75230948 | 58109  | 1 | 0 | 2 | 0          | 0.08289318 | 2 | 3 | 0.6114001  | 0.30102999 |
| chr1 | 75230948 | 75438153 | 207206 | 1 | 0 | 2 | 0          | 0.1755501  | 2 | 2 | 0.6114001  | 0.1755501  |
| chr1 | 75438153 | 75438212 | 60     | 1 | 0 | 2 | 0          | 0.08289318 | 2 | 3 | 0.6114001  | 0.30102999 |
| chr1 | 75438212 | 75617998 | 179787 | 1 | 0 | 2 | 0          | 0.1755501  | 2 | 2 | 0.6114001  | 0.1755501  |
| chr1 | 75617998 | 75618057 | 60     | 1 | 1 | 2 | 0.05404976 | 0.08289318 | 2 | 3 | 0.30102999 | 0.30102999 |
| chr1 | 75618057 | 75672223 | 54167  | 2 | 0 | 2 | 0.05404976 | 0.1755501  | 2 | 2 | 0.30102999 | 0.1755501  |
| chr1 | 75672223 | 76076715 | 404493 | 8 | 0 | 2 | 0          | 0.1755501  | 2 | 2 | 0.6114001  | 0.1755501  |
| chr1 | 76076715 | 76198509 | 121795 | 3 | 0 | 2 | 0          | 0.1755501  | 3 | 2 | 0.93173516 | 0.1755501  |
| chr1 | 76198509 | 76227026 | 28518  | 3 | 0 | 2 | 0          | 0.08289318 | 3 | 3 | 0.93173516 | 0.30102999 |
| chr1 | 76227026 | 76333172 | 106147 | 2 | 0 | 2 | 0          | 0.1755501  | 2 | 2 | 0.6114001  | 0.1755501  |
| chr1 | 76333172 | 76393109 | 59938  | 3 | 0 | 2 | 0          | 0.08289318 | 3 | 3 | 0.93173516 | 0.30102999 |
| chr1 | 76393109 | 76607428 | 214320 | 3 | 0 | 2 | 0          | 0.1755501  | 3 | 2 | 0.93173516 | 0.1755501  |
| chr1 | 76607428 | 76607487 | 60     | 1 | 0 | 2 | 0          | 0.0429175  | 3 | 4 | 0.93173516 | 0.47744371 |
| chr1 | 76607487 | 76671617 | 64131  | 1 | 0 | 2 | 0          | 0.1755501  | 3 | 2 | 0.93173516 | 0.1755501  |
| chr1 | 76671617 | 76779517 | 107901 | 3 | 0 | 2 | 0          | 0.08289318 | 3 | 3 | 0.93173516 | 0.30102999 |
| chr1 | 76779517 | 76779569 | 53     | 1 | 0 | 2 | 0          | 0.02162467 | 3 | 5 | 0.93173516 | 0.68214471 |
| chr1 | 76779569 | 76813869 | 34301  | 1 | 0 | 2 | 0          | 0.0429175  | 3 | 4 | 0.93173516 | 0.47744371 |
| chr1 | 76813869 | 76877932 | 64064  | 1 | 0 | 2 | 0          | 0.08289318 | 3 | 3 | 0.93173516 | 0.30102999 |
| chr1 | 76877932 | 76999406 | 121475 | 2 | 0 | 2 | 0          | 0.1755501  | 2 | 2 | 0.6114001  | 0.1755501  |
| chr1 | 76999406 | 77043603 | 44198  | 2 | 0 | 2 | 0          | 0.0429175  | 2 | 4 | 0.6114001  | 0.47744371 |
| chr1 | 77043603 | 77099919 | 56317  | 3 | 0 | 2 | 0          | 0.0429175  | 3 | 4 | 0.93173516 | 0.47744371 |
| chr1 | 77099919 | 77296310 | 196392 | 2 | 0 | 2 | 0          | 0.08289318 | 3 | 3 | 0.93173516 | 0.30102999 |
| chr1 | 77296310 | 77333185 | 36876  | 2 | 0 | 2 | 0          | 0.0429175  | 3 | 4 | 0.93173516 | 0.47744371 |
| chr1 | 77333185 | 77398143 | 64959  | 1 | 0 | 2 | 0          | 0.08289318 | 3 | 3 | 0.93173516 | 0.30102999 |
| chr1 | 77398143 | 77398202 | 60     | 1 | 0 | 2 | 0          | 0.08289318 | 4 | 3 | 1.26272838 | 0.30102999 |
| chr1 | 77398202 | 77487296 | 89095  | 2 | 0 | 1 | 0          | 0.02438896 | 4 | 3 | 1.26272838 | 0.51676182 |
| chr1 | 77487296 | 77672306 | 185011 | 6 | 0 | 2 | 0          | 0.08289318 | 4 | 3 | 1.26272838 | 0.30102999 |
| chr1 | 77672306 | 77672365 | 60     | 1 | 0 | 2 | 0          | 0.08289318 | 5 | 3 | 1.60515106 | 0.30102999 |
| chr1 | 77672365 | 77747296 | 74932  | 1 | 0 | 1 | 0          | 0.02438896 | 5 | 3 | 1.60515106 | 0.51676182 |
| chr1 | 77747296 | 77883406 | 136111 | 2 | 0 | 1 | 0          | 0.05404976 | 5 | 2 | 1.60515106 | 0.30102999 |
| chr1 | 77883406 | 78002243 | 118838 | 2 | 0 | 1 | 0          | 0.05404976 | 4 | 2 | 1.26272838 | 0.30102999 |
| chr1 | 78002243 | 78030194 | 27952  | 2 | 1 | 1 | 0.00478973 | 0.05404976 | 5 | 2 | 1.02643191 | 0.30102999 |
| chr1 | 78030194 | 78069124 | 38931  | 3 | 1 | 1 | 0.01091641 | 0.05404976 | 4 | 2 | 0.76005302 | 0.30102999 |
| chr1 | 78069124 | 78069183 | 60     | 1 | 1 | 1 | 0.00204627 | 0.05404976 | 6 | 2 | 1.31360226 | 0.30102999 |
| chr1 | 78069183 | 78131099 | 61917  | 2 | 1 | 1 | 0.01091641 | 0.05404976 | 4 | 2 | 0.76005302 | 0.30102999 |
| chr1 | 78131099 | 78161649 | 30551  | 2 | 1 | 1 | 0.00478973 | 0.05404976 | 5 | 2 | 1.02643191 | 0.30102999 |
| chr1 | 78161649 | 78208270 | 46622  | 1 | 1 | 1 | 0.02438896 | 0.05404976 | 3 | 2 | 0.51676182 | 0.30102999 |
| chr1 | 78208270 | 78286423 | 78154  | 3 | 1 | 1 | 0.00478973 | 0.05404976 | 5 | 2 | 1.02643191 | 0.30102999 |
| chr1 | 78286423 | 78470596 | 184174 | 6 | 1 | 4 | 0          | 0.01091641 | 4 | 2 | 0.76005302 | 0.30102999 |
| chr1 | 78470596 | 78550709 | 90114  | 4 | 1 | 2 | 0          | 0.1755501  | 4 | 2 | 0.76005302 | 0.1755501  |
| chr1 | 78550709 | 78601492 | 40784  | 1 | 1 | 1 | 0.01091641 | 0.05404976 | 4 | 2 | 0.76005302 | 0.30102999 |
| chr1 | 78601492 | 78688407 | 86916  | 1 | 1 | 1 | 0.02438896 | 0.05404976 | 3 | 2 | 0.51676182 | 0.30102999 |
| chr1 | 78688407 | 78688466 | 60     | 1 | 1 | 1 | 0.01091641 | 0.05404976 | 4 | 2 | 0.76005302 | 0.30102999 |
| chr1 | 78688466 | 78756739 | 68274  | 1 | 1 | 1 | 0.02438896 | 0.05404976 | 3 | 2 | 0.51676182 | 0.30102999 |
| chr1 | 78756739 | 78789110 | 32372  | 1 | 1 | 1 | 0.01091641 | 0.05404976 | 4 | 2 | 0.76005302 | 0.30102999 |
| chr1 | 78789110 | 78789169 | 60     | 1 | 1 | 1 | 0.00478973 | 0.05404976 | 5 | 2 | 1.02643191 | 0.30102999 |
| chr1 | 78789169 | 78894164 | 104996 | 2 | 1 | 1 | 0.01091641 | 0.05404976 | 4 | 2 | 0.76005302 | 0.30102999 |
| chr1 | 78894164 | 78993287 | 99124  | 4 | 1 | 1 | 0.00478973 | 0.05404976 | 5 | 2 | 1.02643191 | 0.30102999 |
| chr1 | 78993287 | 79334253 | 340967 | 5 | 1 | 1 | 0.02438896 | 0.05404976 | 3 | 2 | 0.51676182 | 0.30102999 |
| chr1 | 79334253 | 79383374 | 49122  | 2 | 1 | 0 | 0.02438896 | 0          | 3 | 1 | 0.51676182 | 0.30102999 |
| chr1 | 79383374 | 79438635 | 55262  | 1 | 0 | 0 | 0.05404976 | 0          | 2 | 1 | 0.30102999 | 0.30102999 |
| chr1 | 79438635 | 79438694 | 60     | 1 | 1 | 1 | 0.05404976 | 0.1218695  | 2 | 1 | 0.30102999 | 0.1218695  |
| chr1 | 79438694 | 79476571 | 37878  | 1 | 0 | 0 | 0.05404976 | 0          | 2 | 1 | 0.30102999 | 0.30102999 |
| chr1 | 79476571 | 79476630 | 60     | 1 | 1 | 1 | 0.05404976 | 0.1218695  | 2 | 1 | 0.30102999 | 0.1218695  |
| chr1 | 79476630 | 79541419 | 64790  | 1 | 0 | 1 | 0          | 0.1218695  | 2 | 1 | 0.6114001  | 0.1218695  |
| chr1 | 79541419 | 79777884 | 236466 | 1 | 0 | 0 | 0          | 0          | 2 | 1 | 0.6114001  | 0.30102999 |
| chr1 | 79777884 | 79777943 | 60     | 1 | 1 | 0 | 0.05404976 | 0          | 2 | 1 | 0.30102999 | 0.30102999 |
| chr1 | 79777943 | 79964480 | 186538 | 1 | 0 | 0 | 0          | 0          | 2 | 1 | 0.6114001  | 0.30102999 |
| chr1 | 79964480 | 80057279 | 92800  | 2 | 0 | 1 | 0.1218695  | 0          | 2 | 1 | 0.6114001  | 0.1218695  |
| chr1 | 80057279 | 80057338 | 60     | 1 | 0 | 1 | 0          | 0.05404976 | 2 | 1 | 0.6114001  | 0.30102999 |
| chr1 | 80057338 | 80505598 | 448261 | 2 | 0 | 1 | 0          | 0.1218695  | 1 | 1 | 0.30102999 | 0.1218695  |
| chr1 | 80505598 | 80566615 | 151018 | 2 | 0 | 1 | 0          | 0.1218695  | 2 | 1 | 0.6114001  | 0.1218695  |
| chr1 | 80566615 | 80928119 | 271505 | 2 | 0 | 1 | 0          | 0.1218695  | 0 | 1 | 0          | 0.1218695  |
| chr1 | 80928119 | 80961418 | 33300  | 2 | 0 | 1 | 0          | 0.1218695  | 2 | 1 | 0.6114001  | 0.1218695  |
| chr1 | 80961418 | 81352882 | 391465 | 2 | 0 | 1 | 0          | 0.1218695  | 1 | 1 | 0.30102999 | 0.1218695  |
| chr1 | 81352882 | 81352941 | 60     | 1 | 0 | 2 | 0          | 0.1755501  | 2 | 2 | 0.6114001  | 0.1755501  |
| chr1 | 81352941 | 81696782 | 343842 | 3 | 0 | 1 | 0          | 0.05404976 | 2 | 2 | 0.6114001  | 0.30102999 |
| chr1 | 81696782 | 81902679 | 205898 | 4 | 0 | 2 | 0          | 0.1755501  | 2 | 2 | 0.6114001  | 0.1755501  |
| chr1 | 81902679 | 81951341 | 48663  | 1 | 0 | 1 | 0          | 0.05404976 | 2 | 2 | 0.6114001  | 0.30102999 |
| chr1 | 81951341 | 82117214 | 165874 | 3 | 0 |   |            |            |   |   |            |            |



|      |          |          |        |   |   |   |            |            |   |   |            |            |
|------|----------|----------|--------|---|---|---|------------|------------|---|---|------------|------------|
| chr1 | 85738699 | 85786373 | 47675  | 1 | 0 | 1 | 0          | 0.01091641 | 2 | 4 | 0.61140001 | 0.76005302 |
| chr1 | 85786373 | 85817170 | 30798  | 1 | 0 | 1 | 0          | 0.02438896 | 2 | 3 | 0.61140001 | 0.51676182 |
| chr1 | 85817170 | 85890856 | 73687  | 3 | 0 | 1 | 0          | 0.02438896 | 3 | 3 | 0.93173516 | 0.51676182 |
| chr1 | 85890856 | 85920127 | 29272  | 2 | 0 | 2 | 0          | 0.0429175  | 3 | 4 | 0.93173516 | 0.47744371 |
| chr1 | 85920127 | 86246693 | 326567 | 7 | 0 | 1 | 0          | 0.02438896 | 3 | 3 | 0.93173516 | 0.51676182 |
| chr1 | 86246693 | 86246752 | 60     | 1 | 0 | 2 | 0          | 0.0429175  | 3 | 4 | 0.93173516 | 0.47744371 |
| chr1 | 86246752 | 86369841 | 123090 | 2 | 0 | 1 | 0          | 0.01091641 | 3 | 4 | 0.93173516 | 0.76005302 |
| chr1 | 86369841 | 86369900 | 60     | 1 | 0 | 2 | 0          | 0.0429175  | 3 | 4 | 0.93173516 | 0.47744371 |
| chr1 | 86369900 | 86480595 | 110696 | 2 | 0 | 2 | 0          | 0.08289318 | 2 | 3 | 0.61140001 | 0.30102999 |
| chr1 | 86480595 | 86480654 | 60     | 1 | 0 | 2 | 0          | 0.02162467 | 3 | 5 | 0.93173516 | 0.68214471 |
| chr1 | 86480654 | 86524822 | 44169  | 1 | 0 | 2 | 0          | 0.08289318 | 3 | 3 | 0.93173516 | 0.30102999 |
| chr1 | 86524822 | 86524881 | 60     | 1 | 0 | 2 | 0          | 0.0429175  | 4 | 4 | 1.26272838 | 0.47744371 |
| chr1 | 86524881 | 86622160 | 97280  | 2 | 0 | 1 | 0          | 0.01091641 | 4 | 4 | 0.93173516 | 0.76005302 |
| chr1 | 86622160 | 86658426 | 36267  | 2 | 0 | 1 | 0          | 0.01091641 | 4 | 4 | 1.26272838 | 0.76005302 |
| chr1 | 86658426 | 86792408 | 133983 | 1 | 0 | 1 | 0          | 0.01091641 | 3 | 4 | 0.93173516 | 0.76005302 |
| chr1 | 86792408 | 87026053 | 233646 | 6 | 0 | 2 | 0          | 0.01053319 | 3 | 6 | 0.93173516 | 0.91219088 |
| chr1 | 87026053 | 87101691 | 75639  | 1 | 0 | 2 | 0          | 0.01053319 | 2 | 6 | 0.61140001 | 0.91219088 |
| chr1 | 87101691 | 87329131 | 227441 | 4 | 0 | 2 | 0          | 0.02162467 | 2 | 5 | 0.61140001 | 0.68214471 |
| chr1 | 87329131 | 87382584 | 53454  | 3 | 0 | 2 | 0          | 0.01053319 | 2 | 6 | 0.61140001 | 0.91219088 |
| chr1 | 87382584 | 87382643 | 60     | 1 | 0 | 2 | 0          | 0.00493743 | 2 | 7 | 0.61140001 | 1.16581773 |
| chr1 | 87382643 | 87384692 | 82050  | 2 | 0 | 2 | 0          | 0.02162467 | 2 | 5 | 0.61140001 | 0.68214471 |
| chr1 | 87464692 | 87464751 | 60     | 1 | 0 | 2 | 0          | 0.01053319 | 2 | 6 | 0.61140001 | 0.91219088 |
| chr1 | 87464751 | 87634241 | 169491 | 5 | 0 | 2 | 0          | 0.0429175  | 2 | 4 | 0.61140001 | 0.47744371 |
| chr1 | 87634241 | 87674452 | 40212  | 2 | 0 | 2 | 0          | 0.01053319 | 2 | 6 | 0.61140001 | 0.91219088 |
| chr1 | 87674452 | 87674511 | 60     | 1 | 0 | 2 | 0          | 0.01053319 | 1 | 3 | 0.61140001 | 0.91219088 |
| chr1 | 87674511 | 87797897 | 123387 | 1 | 0 | 1 | 0          | 0.00478973 | 3 | 3 | 0.93173516 | 1.02643191 |
| chr1 | 87797897 | 87810977 | 13081  | 3 | 0 | 1 | 0          | 0.00204627 | 3 | 6 | 0.93173516 | 1.31360226 |
| chr1 | 87810977 | 87873063 | 62087  | 1 | 0 | 1 | 0          | 0.00478973 | 1 | 2 | 0.61140001 | 1.02643191 |
| chr1 | 87873063 | 88079298 | 206236 | 2 | 0 | 0 | 0          | 0          | 2 | 5 | 0.61140001 | 1.60515106 |
| chr1 | 88079298 | 88079357 | 60     | 1 | 0 | 1 | 0          | 0.00478973 | 2 | 5 | 0.61140001 | 1.02643191 |
| chr1 | 88079357 | 88415379 | 336023 | 2 | 0 | 0 | 0          | 0          | 2 | 1 | 0.61140001 | 0.30102999 |
| chr1 | 88415379 | 88415438 | 60     | 1 | 0 | 1 | 0          | 0.1218695  | 2 | 1 | 0.61140001 | 0.1218695  |
| chr1 | 88415438 | 88673048 | 257611 | 2 | 0 | 0 | 0          | 0          | 2 | 1 | 0.61140001 | 0.30102999 |
| chr1 | 88673048 | 88767982 | 94935  | 2 | 0 | 1 | 0          | 0.1218695  | 2 | 1 | 0.61140001 | 0.1218695  |
| chr1 | 88767982 | 88768041 | 60     | 1 | 0 | 1 | 0          | 0.05404976 | 2 | 2 | 0.61140001 | 0.30102999 |
| chr1 | 88768041 | 89074748 | 306708 | 3 | 0 | 0 | 0          | 0          | 2 | 1 | 0.61140001 | 0.30102999 |
| chr1 | 89074748 | 89137658 | 62911  | 2 | 0 | 0 | 0          | 0          | 3 | 2 | 0.93173516 | 0.61140001 |
| chr1 | 89137658 | 89456653 | 318996 | 8 | 1 | 0 | 0.02438896 | 0          | 3 | 2 | 0.51676182 | 0.61140001 |
| chr1 | 89456653 | 89531764 | 75112  | 1 | 1 | 1 | 0.02438896 | 0.05404976 | 3 | 2 | 0.51676182 | 0.30102999 |
| chr1 | 89531764 | 89729598 | 197835 | 5 | 1 | 0 | 0.01091641 | 0.05404976 | 4 | 2 | 0.76005302 | 0.30102999 |
| chr1 | 89729598 | 90033591 | 303994 | 7 | 1 | 1 | 0.00478973 | 0.05404976 | 5 | 2 | 1.02643191 | 0.30102999 |
| chr1 | 90033591 | 90133991 | 100401 | 5 | 2 | 1 | 0.02162467 | 0.05404976 | 5 | 2 | 0.68214471 | 0.30102999 |
| chr1 | 90133991 | 90209527 | 75537  | 2 | 1 | 1 | 0.00478973 | 0.05404976 | 5 | 2 | 1.02643191 | 0.30102999 |
| chr1 | 90209527 | 90287674 | 78148  | 2 | 2 | 2 | 0.02162467 | 0.1575501  | 5 | 2 | 0.68214471 | 0.1575501  |
| chr1 | 90287674 | 90461398 | 173725 | 3 | 2 | 1 | 0.02162467 | 0.05404976 | 5 | 2 | 0.68214471 | 0.30102999 |
| chr1 | 90461398 | 90570894 | 109497 | 4 | 2 | 1 | 0.02162467 | 0.1575501  | 2 | 2 | 0.68214471 | 0.1575501  |
| chr1 | 90570894 | 90706502 | 135609 | 1 | 0 | 1 | 0          | 0.05404976 | 4 | 2 | 1.26272838 | 0.30102999 |
| chr1 | 90706502 | 90826352 | 119851 | 2 | 0 | 1 | 0          | 0.02438896 | 4 | 3 | 1.26272838 | 0.51676182 |
| chr1 | 90826352 | 90826411 | 60     | 1 | 1 | 2 | 0.01091641 | 0.08289318 | 4 | 3 | 0.76005302 | 0.30102999 |
| chr1 | 90826411 | 91006280 | 179870 | 1 | 0 | 2 | 0          | 0.1575501  | 4 | 2 | 1.26272838 | 0.1575501  |
| chr1 | 91006280 | 91193502 | 187223 | 2 | 0 | 2 | 0          | 0.30102999 | 4 | 1 | 1.26272838 | 0.05404976 |
| chr1 | 91193502 | 91404764 | 211263 | 4 | 0 | 2 | 0          | 0.1575501  | 4 | 2 | 1.26272838 | 0.1575501  |
| chr1 | 91404764 | 91447869 | 43106  | 1 | 0 | 2 | 0          | 0.30102999 | 4 | 1 | 1.26272838 | 0.05404976 |
| chr1 | 91447869 | 91447928 | 60     | 1 | 0 | 2 | 0          | 0.30102999 | 5 | 1 | 1.60515106 | 0.05404976 |
| chr1 | 91447928 | 91518883 | 70956  | 2 | 0 | 1 | 0          | 0.30102999 | 5 | 0 | 1.60515106 | 0          |
| chr1 | 91518883 | 91603849 | 84967  | 1 | 0 | 0 | 0          | 0          | 5 | 0 | 1.60515106 | 0          |
| chr1 | 91603849 | 91656401 | 52553  | 2 | 0 | 1 | 0          | 0.30102999 | 6 | 0 | 1.95986592 | 0          |
| chr1 | 91656401 | 91656460 | 60     | 1 | 0 | 2 | 0          | 0.61140001 | 6 | 0 | 1.95986592 | 0          |
| chr1 | 91656460 | 91783820 | 127361 | 2 | 0 | 1 | 0          | 0.30102999 | 6 | 0 | 1.95986592 | 0          |
| chr1 | 91783820 | 91841825 | 58006  | 2 | 0 | 2 | 0          | 0.61140001 | 6 | 0 | 1.95986592 | 0          |
| chr1 | 91841825 | 91841884 | 60     | 1 | 0 | 2 | 0          | 0.30102999 | 6 | 1 | 1.95986592 | 0.05404976 |
| chr1 | 91841884 | 91915483 | 73600  | 1 | 0 | 2 | 0          | 0.30102999 | 5 | 1 | 1.60515106 | 0.05404976 |
| chr1 | 91915483 | 91968170 | 52688  | 1 | 0 | 2 | 0          | 0.30102999 | 4 | 1 | 1.26272838 | 0.05404976 |
| chr1 | 91968170 | 92047477 | 79308  | 2 | 0 | 2 | 0          | 0.30102999 | 3 | 1 | 0.93173516 | 0.05404976 |
| chr1 | 92047477 | 92148550 | 101074 | 3 | 4 | 0 | 0          | 0.30102999 | 4 | 1 | 1.26272838 | 0.05404976 |
| chr1 | 92148550 | 92232559 | 144010 | 4 | 0 | 2 | 0          | 0.30102999 | 1 | 0 | 0.93173516 | 0.05404976 |
| chr1 | 92232559 | 92292618 | 60     | 1 | 0 | 2 | 0          | 0.08289318 | 4 | 3 | 1.26272838 | 0.30102999 |
| chr1 | 92292618 | 92365223 | 72606  | 2 | 0 | 2 | 0          | 0.08289318 | 2 | 3 | 0.61140001 | 0.30102999 |
| chr1 | 92365223 | 92394807 | 29585  | 2 | 0 | 2 | 0          | 0.08289318 | 3 | 3 | 0.93173516 | 0.30102999 |
| chr1 | 92394807 | 92446314 | 51508  | 3 | 0 | 2 | 0          | 0.1575501  | 3 | 2 | 0.61140001 | 0.1575501  |
| chr1 | 92446314 | 92446373 | 60     | 1 | 0 | 2 | 0          | 0.1575501  | 3 | 2 | 0.93173516 | 0.1575501  |
| chr1 | 92446373 | 92636078 | 189706 | 5 | 0 | 2 | 0          | 0.1575501  | 2 | 2 | 0.61140001 | 0.1575501  |
| chr1 | 92636078 | 92668850 | 32773  | 3 | 0 | 2 | 0          | 0.08289318 | 3 | 3 | 0.93173516 | 0.30102999 |
| chr1 | 92668850 | 92730220 | 61371  | 2 | 0 | 2 | 0          | 0.08289318 | 4 | 3 | 1.26272838 | 0.30102999 |
| chr1 | 92730220 | 92789083 | 58864  | 2 | 0 | 2 | 0          | 0.08289318 | 3 | 3 | 0.93173516 | 0.30102999 |
| chr1 | 92789083 | 93045810 | 256728 | 7 | 0 | 2 | 0          | 0.08289318 | 4 | 3 | 1.26272838 | 0.30102999 |
| chr1 | 93045810 | 93160922 | 115113 | 2 | 0 | 2 | 0          | 0.08289318 | 3 | 3 | 0.93173516 | 0.30102999 |
| chr1 | 93160922 | 93160981 | 60     | 1 | 0 | 2 | 0          | 0.08289318 | 4 | 3 | 1.26272838 | 0.30102999 |
| chr1 | 93160981 | 93202086 | 41106  | 2 | 0 | 2 | 0          | 0.1575501  | 4 | 2 | 1.26272838 | 0.1575501  |
| chr1 | 93202086 | 93257895 | 55810  | 1 | 0 | 2 | 0          | 0.1575501  | 3 | 2 | 0.93173516 | 0.1575501  |
| chr1 | 93257895 | 93257948 | 54     | 1 | 0 | 2 | 0          | 0.08289318 | 3 | 3 | 0.93173516 | 0.30102999 |
| chr1 | 93257948 | 93422917 | 164970 | 5 | 0 | 1 | 0          | 0.02438896 | 3 | 3 | 0.93173516 | 0.51676182 |
| chr1 | 93422917 | 93455991 | 123075 | 2 | 0 | 1 | 0          | 0.05404976 | 3 | 2 | 0.93173516 | 0.30102999 |
| chr1 | 93455991 | 93460500 | 60     | 1 | 0 | 1 | 0          | 0.02438896 | 3 | 3 | 0.93173516 | 0.51676182 |
| chr1 | 93460500 | 93599711 | 53662  | 1 | 0 | 1 | 0          | 0.05404976 | 3 | 2 | 0.93173516 | 0.30102999 |
| chr1 | 93599711 | 93645136 | 45426  | 3 | 0 | 1 | 0          | 0.02438896 | 3 | 3 | 0.93173516 | 0.51676182 |
| chr1 | 93645136 | 93736157 | 91022  | 2 | 0 | 1 | 0          | 0.05404976 | 3 | 2 | 0.93173516 | 0.30102999 |
| chr1 | 93736157 | 93825274 | 89118  | 5 | 0 | 1 | 0          | 0.02438896 | 3 | 3 | 0.93173516 | 0.51676182 |
| chr1 | 93825274 | 93919246 | 93973  | 1 | 0 | 0 | 0          | 0          | 3 | 2 | 0.93173516 | 0.61140001 |
| chr1 | 93919246 | 93967223 | 47478  | 2 | 1 | 0 | 0.02438896 | 0          | 2 | 2 | 0.51676182 | 0.61140001 |
| chr1 | 93967223 | 93998556 | 31834  | 2 | 2 | 0 | 0.08289318 | 0          | 2 | 2 | 0.30102999 | 0.61140001 |
| chr1 | 93998556 | 94078420 | 79865  | 3 | 2 | 0 | 0.0429175  | 0          | 4 | 2 | 0.47744371 | 0.61140001 |
| chr1 | 94078420 | 94107847 | 29428  | 1 | 0 | 0 | 0          | 0          | 4 | 2 | 1.26272838 | 0.61140001 |
| chr1 | 94107847 | 94140514 | 32668  | 2 | 0 | 0 | 0          | 0          | 5 | 2 | 1.60515106 | 0.61140001 |
| chr1 | 94140514 | 94217172 | 76659  | 1 | 0 | 0 | 0          | 0          | 4 | 0 | 1.26272838 | 0          |
| chr1 | 94217172 | 94276328 | 59157  | 2 | 2 | 0 | 0.0429175  | 0          | 4 | 0 | 0.47744371 | 0          |
| chr1 | 94276328 | 94276387 | 60     | 1 | 0 | 2 | 0          | 0.01053319 | 6 | 0 | 0.9        |            |



|      |           |           |         |    |    |   |            |            |    |   |            |            |
|------|-----------|-----------|---------|----|----|---|------------|------------|----|---|------------|------------|
| chr1 | 112633648 | 112845790 | 212143  | 2  | 0  | 2 | 0          | 0.1575501  | 2  | 2 | 0.6114001  | 0.1575501  |
| chr1 | 112845790 | 113005492 | 159703  | 3  | 0  | 2 | 0          | 0.1575501  | 1  | 2 | 0.3010299  | 0.1575501  |
| chr1 | 113005492 | 113005539 | 48      | 1  | 1  | 2 | 0.1218695  | 0.1575501  | 1  | 2 | 0.1218695  | 0.1575501  |
| chr1 | 113005539 | 113066745 | 61207   | 3  | 0  | 2 | 0          | 0.1575501  | 1  | 2 | 0.3010299  | 0.1575501  |
| chr1 | 113066745 | 113153434 | 86690   | 3  | 0  | 1 | 0          | 0.3010299  | 1  | 1 | 0.3010299  | 0.05404976 |
| chr1 | 113153434 | 113177892 | 24459   | 2  | 0  | 2 | 0          | 0.3010299  | 2  | 1 | 0.6114001  | 0.05404976 |
| chr1 | 113177892 | 113709879 | 531988  | 16 | 2  | 0 | 0          | 0.1575501  | 2  | 2 | 0.6114001  | 0.1575501  |
| chr1 | 113709879 | 114012621 | 302743  | 4  | 0  | 3 | 0          | 0.3010299  | 2  | 2 | 0.6114001  | 0.08289318 |
| chr1 | 114012621 | 114012680 | 60      | 1  | 0  | 3 | 0          | 0.3010299  | 3  | 2 | 0.93173516 | 0.08289318 |
| chr1 | 114012680 | 114092245 | 79566   | 2  | 0  | 3 | 0          | 0.3010299  | 2  | 2 | 0.6114001  | 0.08289318 |
| chr1 | 114092245 | 114185035 | 92791   | 2  | 0  | 2 | 0          | 0.1575501  | 2  | 2 | 0.6114001  | 0.1575501  |
| chr1 | 114185035 | 114280830 | 95796   | 4  | 0  | 3 | 0          | 0.17593012 | 2  | 3 | 0.6114001  | 0.17593012 |
| chr1 | 114280830 | 114348386 | 67557   | 2  | 0  | 3 | 0          | 0.3010299  | 2  | 2 | 0.6114001  | 0.08289318 |
| chr1 | 114348386 | 114348445 | 60      | 1  | 0  | 3 | 0          | 0.17593012 | 2  | 3 | 0.6114001  | 0.17593012 |
| chr1 | 114348445 | 114412437 | 63993   | 2  | 0  | 3 | 0          | 0.3010299  | 2  | 2 | 0.6114001  | 0.08289318 |
| chr1 | 114412437 | 114412496 | 60      | 1  | 0  | 3 | 0          | 0.17593012 | 3  | 3 | 0.93173516 | 0.17593012 |
| chr1 | 114412496 | 114523716 | 111221  | 7  | 0  | 3 | 0          | 0.3010299  | 3  | 2 | 0.93173516 | 0.08289318 |
| chr1 | 114523716 | 114633644 | 109929  | 1  | 0  | 3 | 0          | 0.3010299  | 2  | 2 | 0.6114001  | 0.08289318 |
| chr1 | 114633644 | 114633703 | 60      | 1  | 0  | 3 | 0          | 0.1575501  | 2  | 3 | 0.6114001  | 0.17593012 |
| chr1 | 114633703 | 114687533 | 53823   | 3  | 0  | 3 | 0          | 0.17593012 | 1  | 3 | 0.3010299  | 0.17593012 |
| chr1 | 114687533 | 114831001 | 143467  | 1  | 0  | 3 | 0          | 0.3010299  | 1  | 2 | 0.3010299  | 0.08289318 |
| chr1 | 114831001 | 114942064 | 111064  | 2  | 0  | 3 | 0          | 0.17593012 | 2  | 2 | 0.6114001  | 0.17593012 |
| chr1 | 114942064 | 115121131 | 179068  | 6  | 0  | 3 | 0          | 0.05670724 | 2  | 5 | 0.6114001  | 0.45545077 |
| chr1 | 115121131 | 115148610 | 27480   | 1  | 0  | 3 | 0          | 0.10122019 | 2  | 2 | 0.6114001  | 0.3010299  |
| chr1 | 115148610 | 115398406 | 249797  | 9  | 0  | 3 | 0          | 0.10122019 | 3  | 4 | 0.93173516 | 0.3010299  |
| chr1 | 115398406 | 115489021 | 90616   | 4  | 0  | 3 | 0          | 0.05670724 | 3  | 5 | 0.93173516 | 0.45545077 |
| chr1 | 115489021 | 115621914 | 132894  | 4  | 0  | 3 | 0          | 0.10122019 | 3  | 4 | 0.93173516 | 0.3010299  |
| chr1 | 115621914 | 115874785 | 252872  | 5  | 0  | 2 | 0          | 0.0429175  | 3  | 4 | 0.93173516 | 0.47744371 |
| chr1 | 115874785 | 116235824 | 361040  | 7  | 0  | 3 | 0          | 0.10122019 | 3  | 4 | 0.93173516 | 0.3010299  |
| chr1 | 116235824 | 116270823 | 35000   | 3  | 1  | 3 | 0.02438896 | 0.10122019 | 3  | 4 | 0.51676182 | 0.3010299  |
| chr1 | 116270823 | 116677525 | 406703  | 11 | 1  | 3 | 0.02438896 | 0.05670724 | 3  | 5 | 0.51676182 | 0.45545077 |
| chr1 | 116677525 | 117147182 | 469658  | 9  | 1  | 3 | 0.02438896 | 0.10122019 | 3  | 4 | 0.51676182 | 0.3010299  |
| chr1 | 117147182 | 117207200 | 60019   | 1  | 1  | 3 | 0.05404976 | 0.10122019 | 2  | 4 | 0.3010299  | 0.3010299  |
| chr1 | 117207200 | 117269845 | 62646   | 3  | 1  | 3 | 0.05404976 | 0.05670724 | 2  | 5 | 0.3010299  | 0.45545077 |
| chr1 | 117269845 | 117315364 | 45520   | 2  | 1  | 3 | 0.05404976 | 0.10122019 | 2  | 4 | 0.3010299  | 0.3010299  |
| chr1 | 117315364 | 117624672 | 309309  | 6  | 1  | 3 | 0.05404976 | 0.05670724 | 2  | 5 | 0.3010299  | 0.45545077 |
| chr1 | 117624672 | 11775388  | 150717  | 5  | 1  | 3 | 0.02438896 | 0.05670724 | 3  | 5 | 0.51676182 | 0.45545077 |
| chr1 | 11775388  | 118003260 | 227873  | 4  | 1  | 3 | 0.02438896 | 0.10122019 | 3  | 4 | 0.51676182 | 0.3010299  |
| chr1 | 118003260 | 118168804 | 165545  | 6  | 1  | 3 | 0.02438896 | 0.17593012 | 3  | 3 | 0.51676182 | 0.17593012 |
| chr1 | 118168804 | 118344509 | 175706  | 3  | 0  | 3 | 0          | 0.17593012 | 3  | 3 | 0.93173516 | 0.17593012 |
| chr1 | 118344509 | 118344568 | 60      | 1  | 0  | 3 | 0          | 0.10122019 | 3  | 4 | 0.93173516 | 0.3010299  |
| chr1 | 118344568 | 118420090 | 75523   | 2  | 0  | 2 | 0          | 0.08289318 | 3  | 3 | 0.93173516 | 0.3010299  |
| chr1 | 118420090 | 118420149 | 60      | 1  | 0  | 2 | 0          | 0.0429175  | 3  | 4 | 0.93173516 | 0.47744371 |
| chr1 | 118420149 | 118502389 | 82241   | 4  | 0  | 1 | 0          | 0.02438896 | 3  | 3 | 0.93173516 | 0.51676182 |
| chr1 | 118502389 | 118571048 | 68660   | 1  | 0  | 1 | 0          | 0.05404976 | 3  | 2 | 0.93173516 | 0.3010299  |
| chr1 | 118571048 | 118630796 | 59749   | 1  | 0  | 1 | 0          | 0.05404976 | 2  | 2 | 0.6114001  | 0.3010299  |
| chr1 | 118630796 | 118733871 | 103076  | 3  | 0  | 1 | 0          | 0.02438896 | 3  | 0 | 0.6114001  | 0.51676182 |
| chr1 | 118733871 | 118789436 | 55566   | 2  | 0  | 1 | 0          | 0.01091641 | 2  | 4 | 0.6114001  | 0.76005302 |
| chr1 | 118789436 | 118789495 | 60      | 1  | 1  | 1 | 0.05404976 | 0.01091641 | 2  | 4 | 0.3010299  | 0.76005302 |
| chr1 | 118789495 | 118983652 | 194158  | 2  | 0  | 1 | 0          | 0.02438896 | 2  | 0 | 0.6114001  | 0.51676182 |
| chr1 | 118983652 | 119148222 | 164571  | 1  | 0  | 1 | 0          | 0.05404976 | 2  | 2 | 0.6114001  | 0.3010299  |
| chr1 | 119148222 | 119148281 | 60      | 1  | 0  | 1 | 0          | 0.05404976 | 3  | 2 | 0.93173516 | 0.3010299  |
| chr1 | 119148281 | 119261982 | 113702  | 1  | 0  | 1 | 0          | 0.05404976 | 2  | 2 | 0.6114001  | 0.3010299  |
| chr1 | 119261982 | 119367354 | 105373  | 2  | 0  | 1 | 0          | 0.02438896 | 2  | 0 | 0.6114001  | 0.51676182 |
| chr1 | 119367354 | 119419142 | 51789   | 1  | 0  | 1 | 0          | 0.05404976 | 2  | 2 | 0.6114001  | 0.3010299  |
| chr1 | 119419142 | 119491487 | 72346   | 2  | 1  | 1 | 0.05404976 | 0.05404976 | 2  | 2 | 0.3010299  | 0.3010299  |
| chr1 | 119491487 | 119688977 | 197491  | 5  | 1  | 1 | 0.05404976 | 0.02438896 | 2  | 3 | 0.3010299  | 0.51676182 |
| chr1 | 119688977 | 119689036 | 60      | 1  | 1  | 1 | 0.01091641 | 0.02438896 | 4  | 3 | 0.76005302 | 0.51676182 |
| chr1 | 119689036 | 119800039 | 111004  | 2  | 1  | 0 | 0.05404976 | 0.05404976 | 2  | 3 | 0.3010299  | 0.93173516 |
| chr1 | 119800039 | 119873476 | 73438   | 2  | 1  | 0 | 0.02438896 | 0.05404976 | 3  | 3 | 0.51676182 | 0.93173516 |
| chr1 | 119873476 | 120164940 | 291465  | 7  | 1  | 0 | 0.05404976 | 0.05404976 | 2  | 3 | 0.3010299  | 0.93173516 |
| chr1 | 120164940 | 120270940 | 106001  | 2  | 1  | 0 | 0.05404976 | 0.05404976 | 2  | 2 | 0.3010299  | 0.6114001  |
| chr1 | 120270940 | 120307096 | 36157   | 3  | 1  | 0 | 0.02438896 | 0.05404976 | 3  | 3 | 0.51676182 | 0.93173516 |
| chr1 | 120307096 | 120351499 | 44404   | 4  | 1  | 1 | 0.02438896 | 0.02438896 | 3  | 3 | 0.51676182 | 0.51676182 |
| chr1 | 120351499 | 120414981 | 63483   | 1  | 1  | 0 | 0.02438896 | 0.05404976 | 3  | 2 | 0.51676182 | 0.6114001  |
| chr1 | 120414981 | 120585364 | 170384  | 5  | 0  | 0 | 0.05404976 | 0.1575501  | 2  | 2 | 0.3010299  | 0.6114001  |
| chr1 | 120585364 | 120585423 | 60      | 1  | 2  | 0 | 0          | 0.1575501  | 2  | 2 | 0.1575501  | 0.6114001  |
| chr1 | 120585423 | 121184327 | 598905  | 2  | 1  | 0 | 0.05404976 | 0.05404976 | 2  | 2 | 0.3010299  | 0.3010299  |
| chr1 | 121184327 | 144927778 | 2374352 | 2  | 0  | 0 | 0          | 0          | 1  | 0 | 0.3010299  | 0.3010299  |
| chr1 | 144927778 | 145291770 | 363993  | 9  | 0  | 0 | 0.76806864 | 0.05404976 | 5  | 0 | 0.02473314 | 0          |
| chr1 | 145291770 | 145663189 | 371420  | 16 | 8  | 0 | 0.58747015 | 0.05404976 | 5  | 0 | 0.04407651 | 0          |
| chr1 | 145663189 | 145663248 | 60      | 1  | 0  | 0 | 0.5732208  | 0.05404976 | 6  | 0 | 0.04875589 | 0          |
| chr1 | 145663248 | 145715602 | 52355   | 2  | 8  | 0 | 0.58747015 | 0.05404976 | 5  | 0 | 0.04407651 | 0          |
| chr1 | 145715602 | 145740598 | 24997   | 2  | 8  | 0 | 0.4250187  | 0.05404976 | 6  | 0 | 0.08122616 | 0          |
| chr1 | 145740598 | 145747269 | 6672    | 2  | 9  | 0 | 0.5732208  | 0.05404976 | 6  | 0 | 0.04875589 | 0          |
| chr1 | 145747269 | 146324068 | 576800  | 1  | 9  | 0 | 0.76806864 | 0.05404976 | 5  | 0 | 0.02473314 | 0          |
| chr1 | 146324068 | 146347155 | 23088   | 2  | 13 | 0 | 0.3010299  | 0.05404976 | 12 | 0 | 0.14385241 | 0          |
| chr1 | 146347155 | 146564802 | 217648  | 1  | 12 | 0 | 0.41314172 | 0.05404976 | 10 | 0 | 0.09290028 | 0          |
| chr1 | 146564802 | 146646378 | 81577   | 2  | 10 | 0 | 0.21118145 | 0.05404976 | 10 | 0 | 0.21118145 | 0          |
| chr1 | 146646378 | 146696665 | 50288   | 2  | 6  | 0 | 0.04875589 | 0.05404976 | 9  | 0 | 0.5732208  | 0          |
| chr1 | 146696665 | 146696722 | 58      | 1  | 7  | 0 | 0.08584816 | 0.05404976 | 9  | 0 | 0.42015402 | 0          |
| chr1 | 146696722 | 146738716 | 41995   | 1  | 6  | 0 | 0.04875589 | 0.05404976 | 9  | 0 | 0.5732208  | 0          |
| chr1 | 146738716 | 146738775 | 60      | 1  | 7  | 0 | 0.08584816 | 0.05404976 | 9  | 0 | 0.42015402 | 0          |
| chr1 | 146738775 | 146807433 | 68659   | 4  | 6  | 0 | 0.08122616 | 0.05404976 | 8  | 0 | 0.4250187  | 0          |
| chr1 | 146807433 | 147356575 | 549143  | 13 | 8  | 0 | 0.13872638 | 0.05404976 | 9  | 0 | 0.3010299  | 0          |
| chr1 | 147356575 | 14745551  | 388977  | 2  | 9  | 0 | 0.20975986 | 0.05404976 | 9  | 0 | 0.20975986 | 0          |
| chr1 | 14745551  | 147786647 | 41097   | 2  | 9  | 0 | 0.14135546 | 0.05404976 | 10 | 0 | 0.3010299  | 0          |
| chr1 | 147786647 | 147786706 | 60      | 1  | 10 | 0 | 0.14303407 | 0.05404976 | 11 | 0 | 0.3010299  | 0          |
| chr1 | 147786706 | 149223984 | 1437279 | 4  | 3  | 0 | 0.17593012 | 0.05404976 | 3  | 0 | 0.17593012 | 0          |
| chr1 | 149223984 | 149815145 | 591162  | 2  | 5  | 0 | 0.19510895 | 0.05404976 | 5  | 0 | 0.19510895 | 0          |
| chr1 | 149815145 | 149973911 | 158767  | 12 | 16 | 1 | 0.91308053 | 0.3010299  | 11 | 0 | 0.01767679 | 0          |
| chr1 | 149973911 | 150125741 | 151831  | 5  | 17 | 1 | 1.14735594 | 0.3010299  | 11 | 0 | 0.00859896 | 0          |
| chr1 | 150125741 | 150192197 | 66457   | 2  | 17 | 1 | 0.92532268 | 0.3010299  | 12 | 0 | 0.01667721 | 0          |
| chr1 | 150192197 | 150224224 | 32028   | 4  |    |   |            |            |    |   |            |            |

|      |           |           |        |    |    |   |            |              |    |   |             |   |
|------|-----------|-----------|--------|----|----|---|------------|--------------|----|---|-------------|---|
| chr1 | 152778094 | 152822767 | 44674  | 3  | 18 | 0 | 0.74627054 | 0            | 14 | 0 | 0.02793176  | 0 |
| chr1 | 152822767 | 152882381 | 59615  | 3  | 19 | 0 | 0.97390707 | 0            | 14 | 0 | 0.01320236  | 0 |
| chr1 | 152882381 | 152957573 | 75193  | 2  | 17 | 0 | 0.56314362 | 0            | 14 | 0 | 0.05232577  | 0 |
| chr1 | 152957573 | 153113473 | 155901 | 6  | 18 | 0 | 0.74627054 | 0            | 14 | 0 | 0.02793176  | 0 |
| chr1 | 153113473 | 153281469 | 167997 | 3  | 17 | 0 | 0.56314362 | 0            | 14 | 0 | 0.05232577  | 0 |
| chr1 | 153281469 | 153390393 | 108925 | 7  | 17 | 0 | 0.42015402 | 0            | 15 | 0 | 0.08584816  | 0 |
| chr1 | 153390393 | 153431653 | 41261  | 2  | 18 | 0 | 0.5732208  | 0            | 15 | 0 | 0.04875589  | 0 |
| chr1 | 153431653 | 153587847 | 156195 | 2  | 17 | 0 | 0.42015402 | 0            | 15 | 0 | 0.08584816  | 0 |
| chr1 | 153587847 | 153613593 | 25747  | 2  | 17 | 0 | 0.56314362 | 0            | 14 | 0 | 0.05232577  | 0 |
| chr1 | 153613593 | 153653756 | 40164  | 6  | 18 | 0 | 0.5732208  | 0            | 15 | 0 | 0.04875589  | 0 |
| chr1 | 153653756 | 153751465 | 97710  | 2  | 16 | 0 | 0.30102999 | 0            | 15 | 0 | 0.13872638  | 0 |
| chr1 | 153751465 | 153780441 | 28977  | 2  | 17 | 0 | 0.42015402 | 0            | 15 | 0 | 0.08584816  | 0 |
| chr1 | 153780441 | 153780500 | 60     | 1  | 18 | 0 | 0.5732208  | 0            | 15 | 0 | 0.04875589  | 0 |
| chr1 | 153780500 | 153911364 | 130865 | 2  | 17 | 0 | 0.42015402 | 0            | 15 | 0 | 0.08584816  | 0 |
| chr1 | 153911364 | 154244969 | 333606 | 18 | 18 | 0 | 0.5732208  | 0            | 15 | 0 | 0.04875589  | 0 |
| chr1 | 154244969 | 154556368 | 311400 | 12 | 19 | 0 | 0.76806864 | 0            | 15 | 0 | 0.02473314  | 0 |
| chr1 | 154556368 | 154668883 | 112516 | 2  | 18 | 0 | 0.5732208  | 0            | 15 | 0 | 0.04875589  | 0 |
| chr1 | 154668883 | 154768680 | 99798  | 3  | 19 | 0 | 0.76806864 | 0            | 15 | 0 | 0.02473314  | 0 |
| chr1 | 154768680 | 154841535 | 72856  | 1  | 18 | 0 | 0.5732208  | 0            | 15 | 0 | 0.04875589  | 0 |
| chr1 | 154841535 | 154841591 | 57     | 1  | 18 | 1 | 0.5732208  | 0.30102999   | 15 | 0 | 0.04875589  | 0 |
| chr1 | 154841591 | 154874822 | 33232  | 1  | 17 | 1 | 0.42015402 | 0.30102999   | 15 | 0 | 0.08584816  | 0 |
| chr1 | 154874822 | 154905221 | 30400  | 2  | 18 | 1 | 0.5732208  | 0.30102999   | 15 | 0 | 0.04875589  | 0 |
| chr1 | 154905221 | 154950080 | 44860  | 8  | 19 | 1 | 0.76806864 | 0.30102999   | 15 | 0 | 0.02473314  | 0 |
| chr1 | 154950080 | 154956259 | 6180   | 3  | 20 | 1 | 1.01542894 | 0.30102999   | 15 | 0 | 0.01077081  | 0 |
| chr1 | 154956259 | 154966445 | 10187  | 2  | 17 | 0 | 0.42015402 | 0            | 15 | 0 | 0.08584816  | 0 |
| chr1 | 154966445 | 154966497 | 53     | 1  | 20 | 0 | 1.01542894 | 0            | 15 | 0 | 0.01077081  | 0 |
| chr1 | 154966497 | 155002715 | 36219  | 2  | 19 | 0 | 0.76806864 | 0            | 15 | 0 | 0.02473314  | 0 |
| chr1 | 155002715 | 155041934 | 39220  | 3  | 18 | 0 | 0.5732208  | 0            | 15 | 0 | 0.04875589  | 0 |
| chr1 | 155041934 | 155102460 | 60527  | 4  | 20 | 1 | 1.01542894 | 0.30102999   | 15 | 0 | 0.01077081  | 0 |
| chr1 | 155102460 | 155105978 | 3519   | 3  | 20 | 1 | 0.79906872 | 0.30102999   | 16 | 0 | 0.02074938  | 0 |
| chr1 | 155105978 | 155150156 | 44179  | 2  | 19 | 1 | 0.58747015 | 0.30102999   | 16 | 0 | 0.04407651  | 0 |
| chr1 | 155150156 | 155160541 | 10386  | 2  | 19 | 1 | 0.79906872 | 0.30102999   | 16 | 0 | 0.02074938  | 0 |
| chr1 | 155160541 | 155179763 | 19223  | 2  | 20 | 0 | 0.79906872 | 0            | 16 | 0 | 0.02074938  | 0 |
| chr1 | 155179763 | 155223256 | 43494  | 2  | 20 | 1 | 0.79906872 | 0.30102999   | 16 | 0 | 0.02074938  | 0 |
| chr1 | 155223256 | 155296964 | 73709  | 8  | 21 | 1 | 1.07548421 | 0.30102999   | 16 | 0 | 0.00796414  | 0 |
| chr1 | 155296964 | 155301141 | 4178   | 2  | 21 | 1 | 0.84395715 | 0.30102999   | 17 | 0 | 0.01598258  | 0 |
| chr1 | 155301141 | 155451995 | 150855 | 4  | 21 | 1 | 1.07548421 | 0.30102999   | 16 | 0 | 0.00796414  | 0 |
| chr1 | 155451995 | 155490934 | 38940  | 2  | 21 | 1 | 0.84395715 | 0.30102999   | 17 | 0 | 0.01598258  | 0 |
| chr1 | 155490934 | 155583172 | 92239  | 2  | 21 | 1 | 1.07548421 | 0.30102999   | 16 | 0 | 0.00796414  | 0 |
| chr1 | 155583172 | 155618638 | 35467  | 2  | 21 | 1 | 0.84395715 | 0.30102999   | 17 | 0 | 0.01598258  | 0 |
| chr1 | 155618638 | 155676280 | 57643  | 2  | 21 | 1 | 0.63695542 | 0.30102999   | 18 | 0 | 0.03070643  | 0 |
| chr1 | 155676280 | 155725479 | 49200  | 1  | 21 | 1 | 0.84395715 | 0.30102999   | 17 | 0 | 0.01598258  | 0 |
| chr1 | 155725479 | 155823553 | 98075  | 3  | 20 | 1 | 0.60763643 | 0.30102999   | 17 | 0 | 0.03812622  | 0 |
| chr1 | 155823553 | 155834366 | 10814  | 2  | 20 | 1 | 0.44141547 | 0.30102999   | 18 | 0 | 0.06713722  | 0 |
| chr1 | 155834366 | 155854920 | 20555  | 2  | 21 | 1 | 0.63695542 | 0.30102999   | 18 | 0 | 0.03070643  | 0 |
| chr1 | 155854920 | 155878883 | 23964  | 1  | 21 | 1 | 0.84395715 | 0.30102999   | 17 | 0 | 0.01598258  | 0 |
| chr1 | 155878883 | 155891663 | 12781  | 1  | 20 | 1 | 0.60763643 | 0.30102999   | 17 | 0 | 0.03812622  | 0 |
| chr1 | 155891663 | 155912396 | 20734  | 3  | 20 | 1 | 0.44141547 | 0.30102999   | 18 | 0 | 0.06713722  | 0 |
| chr1 | 155912396 | 156035336 | 122941 | 6  | 20 | 1 | 0.60763643 | 0.30102999   | 17 | 0 | 0.03812622  | 0 |
| chr1 | 156035336 | 156087914 | 52579  | 2  | 19 | 1 | 0.43181735 | 0.30102999   | 17 | 0 | 0.07511598  | 0 |
| chr1 | 156087914 | 156102366 | 14453  | 2  | 20 | 1 | 0.60763643 | 0.30102999   | 17 | 0 | 0.03812622  | 0 |
| chr1 | 156102366 | 156226345 | 123980 | 6  | 19 | 1 | 0.43181735 | 0.30102999   | 17 | 0 | 0.07511598  | 0 |
| chr1 | 156226345 | 156345455 | 119111 | 7  | 18 | 1 | 0.30102999 | 0.30102999   | 17 | 0 | 0.129913    | 0 |
| chr1 | 156345455 | 156495512 | 150058 | 5  | 19 | 1 | 0.43181735 | 0.30102999   | 17 | 0 | 0.07511598  | 0 |
| chr1 | 156495512 | 156590310 | 94799  | 4  | 19 | 0 | 0.43181735 | 0            | 17 | 0 | 0.07511598  | 0 |
| chr1 | 156590310 | 156643483 | 53174  | 4  | 19 | 0 | 0.30102999 | 0            | 18 | 0 | 0.12309572  | 0 |
| chr1 | 156643483 | 156718114 | 74632  | 5  | 19 | 0 | 0.43181735 | 0            | 17 | 0 | 0.07511598  | 0 |
| chr1 | 156718114 | 156764562 | 46449  | 1  | 18 | 0 | 0.30102999 | 0            | 17 | 0 | 0.129913    | 0 |
| chr1 | 156764562 | 156764620 | 59     | 1  | 18 | 0 | 0.20064824 | 0            | 18 | 0 | 0.20064824  | 0 |
| chr1 | 156764620 | 156786539 | 21920  | 2  | 18 | 0 | 0.30102999 | 0            | 17 | 0 | 0.129913    | 0 |
| chr1 | 156786539 | 156826196 | 39658  | 2  | 19 | 0 | 0.43181735 | 0            | 17 | 0 | 0.07511598  | 0 |
| chr1 | 156826196 | 156831829 | 5634   | 2  | 19 | 0 | 0.30102999 | 0            | 18 | 0 | 0.12309572  | 0 |
| chr1 | 156831829 | 156902854 | 71026  | 4  | 19 | 0 | 0.43181735 | 0            | 17 | 0 | 0.07511598  | 0 |
| chr1 | 156902854 | 156931500 | 28647  | 2  | 19 | 0 | 0.30102999 | 0            | 18 | 0 | 0.12309572  | 0 |
| chr1 | 156931500 | 157014484 | 82985  | 3  | 18 | 0 | 0.20064824 | 0            | 18 | 0 | 0.20064824  | 0 |
| chr1 | 157014484 | 157073703 | 59220  | 4  | 17 | 0 | 0.30102999 | 0            | 16 | 0 | 0.13499266  | 0 |
| chr1 | 157073703 | 157136656 | 62954  | 4  | 16 | 0 | 0.20764654 | 0            | 16 | 0 | 0.20764654  | 0 |
| chr1 | 157136656 | 157252226 | 38571  | 5  | 15 | 0 | 0.13872638 | 0            | 16 | 0 | 0.30102999  | 0 |
| chr1 | 157252226 | 157588107 | 65882  | 5  | 14 | 0 | 0.08923391 | 0            | 16 | 0 | 0.4167287   | 0 |
| chr1 | 157588107 | 157805710 | 217604 | 5  | 14 | 0 | 0.14135546 | 0            | 15 | 0 | 0.30102999  | 0 |
| chr1 | 157805710 | 158027224 | 221515 | 4  | 13 | 0 | 0.09154957 | 0            | 15 | 0 | 0.41444892  | 0 |
| chr1 | 158027224 | 158027283 | 60     | 1  | 14 | 0 | 0.14135546 | 0            | 15 | 0 | 0.30102999  | 0 |
| chr1 | 158027283 | 158056876 | 29594  | 1  | 14 | 0 | 0.21118145 | 0            | 14 | 0 | 0.21118145  | 0 |
| chr1 | 158056876 | 158122085 | 65210  | 1  | 14 | 0 | 0.30102999 | 0            | 13 | 0 | 0.14303407  | 0 |
| chr1 | 158122085 | 158224393 | 102309 | 2  | 13 | 0 | 0.30102999 | 0            | 12 | 0 | 0.14385241  | 0 |
| chr1 | 158224393 | 158390898 | 166506 | 6  | 14 | 0 | 0.30102999 | 0            | 13 | 0 | 0.14303407  | 0 |
| chr1 | 158390898 | 158488089 | 97192  | 2  | 14 | 0 | 0.41314172 | 0            | 12 | 0 | 0.09290028  | 0 |
| chr1 | 158488089 | 158488148 | 60     | 1  | 14 | 0 | 0.30102999 | 0            | 13 | 0 | 0.14303407  | 0 |
| chr1 | 158488148 | 158538605 | 50458  | 1  | 14 | 0 | 0.41314172 | 0            | 12 | 0 | 0.09290028  | 0 |
| chr1 | 158538605 | 158720740 | 182136 | 5  | 14 | 0 | 0.5498098  | 0            | 11 | 0 | 0.0574087   | 0 |
| chr1 | 158720740 | 158720799 | 60     | 1  | 14 | 0 | 0.30102999 | 0            | 13 | 0 | 0.14303407  | 0 |
| chr1 | 158720799 | 158801272 | 80474  | 2  | 14 | 0 | 0.5498098  | 0            | 11 | 0 | 0.0574087   | 0 |
| chr1 | 158801272 | 158871944 | 70673  | 2  | 14 | 0 | 0.41314172 | 0            | 12 | 0 | 0.09290028  | 0 |
| chr1 | 158871944 | 158969905 | 97962  | 3  | 14 | 0 | 0.21118145 | 0            | 14 | 0 | 0.21118145  | 0 |
| chr1 | 158969905 | 159033336 | 63432  | 4  | 14 | 1 | 0.14135546 | 0.30102999   | 15 | 0 | 0.30102999  | 0 |
| chr1 | 159033336 | 159033395 | 60     | 1  | 15 | 1 | 0.13872638 | 0.30102999   | 16 | 0 | 0.30102999  | 0 |
| chr1 | 159033395 | 159109758 | 76364  | 1  | 15 | 1 | 0.20975986 | 0.30102999   | 15 | 0 | 0.20975986  | 0 |
| chr1 | 159109758 | 159109817 | 60     | 1  | 15 | 1 | 0.13872638 | 0.30102999   | 16 | 0 | 0.30102999  | 0 |
| chr1 | 159109817 | 159153841 | 44025  | 1  | 14 | 1 | 0.08923391 | 0.30102999   | 16 | 0 | 0.4167287   | 0 |
| chr1 | 159153841 | 159175344 | 21504  | 3  | 15 | 1 | 0.08584816 | 0.30102999   | 17 | 0 | 0.42015402  | 0 |
| chr1 | 159175344 | 159245116 | 69773  | 1  | 14 | 1 | 0.05232577 | 0.30102999   | 17 | 0 | 0.056314362 | 0 |
| chr1 | 159245116 | 159272127 | 27012  | 1  | 13 | 1 | 0.05490675 | 0.30102999   | 16 | 0 | 0.55623409  | 0 |
| chr1 | 159272127 | 159338089 | 65963  | 1  | 13 | 1 | 0.09154957 | 0.30102999   | 15 | 0 | 0.41444892  | 0 |
| chr1 | 159338089 | 159374865 | 36777  | 2  | 15 | 1 | 0.13872638 | 0.30102999   | 16 | 0 | 0.30102999  | 0 |
| chr1 | 159374865 | 159410021 | 35157  | 2  | 15 | 1 | 0.08584816 | 0.30102999   | 17 | 0 | 0.42015402  | 0 |
| chr1 | 159410021 | 159449736 | 39716  | 1  | 15 | 1 | 0.13872638 | 0.30102999   | 16 | 0 | 0.30102999  | 0 |
| chr1 | 159449736 | 159552255 | 102520 | 2  | 14 | 1 | 0.08923391 | 0.30102999</ |    |   |             |   |

|      |           |           |        |    |    |   |            |            |    |   |            |   |
|------|-----------|-----------|--------|----|----|---|------------|------------|----|---|------------|---|
| chr1 | 161331897 | 161479451 | 147555 | 4  | 15 | 0 | 0.13872638 | 0          | 16 | 0 | 0.30102999 | 0 |
| chr1 | 161479451 | 161618904 | 139454 | 1  | 14 | 0 | 0.14135546 | 0          | 15 | 0 | 0.30102999 | 0 |
| chr1 | 161618904 | 161722268 | 103365 | 4  | 14 | 0 | 0.21118145 | 0          | 14 | 0 | 0.21118145 | 0 |
| chr1 | 161722268 | 161816271 | 94004  | 2  | 13 | 0 | 0.14303407 | 0          | 14 | 0 | 0.30102999 | 0 |
| chr1 | 161816271 | 161882105 | 65835  | 1  | 13 | 0 | 0.21200206 | 0          | 13 | 0 | 0.21200206 | 0 |
| chr1 | 161882105 | 162053488 | 171384 | 4  | 13 | 0 | 0.14303407 | 0          | 14 | 0 | 0.30102999 | 0 |
| chr1 | 162053488 | 162175443 | 121956 | 4  | 14 | 0 | 0.14135546 | 0          | 15 | 0 | 0.30102999 | 0 |
| chr1 | 162175443 | 162175502 | 60     | 1  | 15 | 0 | 0.20975986 | 0          | 15 | 0 | 0.20975986 | 0 |
| chr1 | 162175502 | 162257127 | 81626  | 2  | 12 | 0 | 0.09290028 | 0          | 14 | 0 | 0.41314172 | 0 |
| chr1 | 162257127 | 162492953 | 235827 | 9  | 14 | 0 | 0.21118145 | 0          | 14 | 0 | 0.21118145 | 0 |
| chr1 | 162492953 | 162681021 | 188069 | 6  | 15 | 0 | 0.20975986 | 0          | 15 | 0 | 0.20975986 | 0 |
| chr1 | 162681021 | 162703368 | 22348  | 2  | 15 | 0 | 0.13872638 | 0          | 16 | 0 | 0.30102999 | 0 |
| chr1 | 162703368 | 162703427 | 60     | 1  | 16 | 0 | 0.20764654 | 0          | 16 | 0 | 0.20764654 | 0 |
| chr1 | 162703427 | 162743293 | 39867  | 1  | 15 | 0 | 0.13872638 | 0          | 16 | 0 | 0.30102999 | 0 |
| chr1 | 162743293 | 162832502 | 89210  | 2  | 14 | 0 | 0.08923391 | 0          | 16 | 0 | 0.4167287  | 0 |
| chr1 | 162832502 | 163257049 | 424548 | 6  | 14 | 0 | 0.14135546 | 0          | 15 | 0 | 0.30102999 | 0 |
| chr1 | 163257049 | 163298084 | 41036  | 2  | 13 | 0 | 0.14303407 | 0          | 14 | 0 | 0.30102999 | 0 |
| chr1 | 163298084 | 163379594 | 81511  | 2  | 12 | 0 | 0.30102999 | 0          | 11 | 0 | 0.14385241 | 0 |
| chr1 | 163379594 | 163379653 | 60     | 1  | 12 | 0 | 0.21227046 | 0          | 12 | 0 | 0.21227046 | 0 |
| chr1 | 163379653 | 163574086 | 194434 | 3  | 11 | 0 | 0.14385241 | 0          | 12 | 0 | 0.30102999 | 0 |
| chr1 | 163574086 | 163774145 | 60     | 1  | 13 | 0 | 0.14303407 | 0          | 14 | 0 | 0.30102999 | 0 |
| chr1 | 163774145 | 163862170 | 118026 | 1  | 13 | 0 | 0.21200206 | 0          | 13 | 0 | 0.21200206 | 0 |
| chr1 | 163862170 | 163892229 | 60     | 1  | 14 | 0 | 0.14135546 | 0          | 15 | 0 | 0.30102999 | 0 |
| chr1 | 163892229 | 163811431 | 119203 | 2  | 13 | 0 | 0.14303407 | 0          | 14 | 0 | 0.30102999 | 0 |
| chr1 | 163811431 | 163811490 | 60     | 1  | 14 | 0 | 0.14135546 | 0          | 15 | 0 | 0.30102999 | 0 |
| chr1 | 163811490 | 163887005 | 75516  | 1  | 13 | 0 | 0.14303407 | 0          | 14 | 0 | 0.30102999 | 0 |
| chr1 | 163887005 | 163917093 | 30089  | 1  | 13 | 0 | 0.21200206 | 0          | 13 | 0 | 0.21200206 | 0 |
| chr1 | 163917093 | 163917152 | 60     | 1  | 15 | 0 | 0.30102999 | 0          | 14 | 0 | 0.14135546 | 0 |
| chr1 | 163917152 | 164005836 | 88685  | 1  | 15 | 0 | 0.41444892 | 0          | 13 | 0 | 0.09154957 | 0 |
| chr1 | 164005836 | 164005895 | 60     | 1  | 15 | 0 | 0.20975986 | 0          | 15 | 0 | 0.20975986 | 0 |
| chr1 | 164005895 | 164102192 | 96298  | 1  | 15 | 0 | 0.30102999 | 0          | 14 | 0 | 0.14135546 | 0 |
| chr1 | 164102192 | 164152825 | 50634  | 1  | 13 | 0 | 0.14303407 | 0          | 14 | 0 | 0.30102999 | 0 |
| chr1 | 164152825 | 164204881 | 52057  | 1  | 13 | 0 | 0.30102999 | 0          | 12 | 0 | 0.14385241 | 0 |
| chr1 | 164204881 | 164279155 | 74275  | 1  | 12 | 0 | 0.21227046 | 0          | 12 | 0 | 0.21227046 | 0 |
| chr1 | 164279155 | 164330973 | 51819  | 2  | 13 | 0 | 0.30102999 | 0          | 12 | 0 | 0.14385241 | 0 |
| chr1 | 164330973 | 164394122 | 63150  | 2  | 13 | 0 | 0.21200206 | 0          | 13 | 0 | 0.21200206 | 0 |
| chr1 | 164394122 | 164532450 | 138329 | 2  | 12 | 0 | 0.14385241 | 0          | 13 | 0 | 0.30102999 | 0 |
| chr1 | 164532450 | 164532509 | 60     | 1  | 13 | 0 | 0.14303407 | 0          | 14 | 0 | 0.30102999 | 0 |
| chr1 | 164532509 | 164584717 | 52209  | 1  | 11 | 0 | 0.0574087  | 0          | 14 | 0 | 0.5498098  | 0 |
| chr1 | 164584717 | 164584776 | 60     | 1  | 11 | 0 | 0.0331093  | 0          | 15 | 0 | 0.71538971 | 0 |
| chr1 | 164584776 | 164611232 | 26457  | 1  | 11 | 0 | 0.0574087  | 0          | 14 | 0 | 0.5498098  | 0 |
| chr1 | 164611232 | 164643942 | 32711  | 1  | 10 | 0 | 0.03344703 | 0          | 14 | 0 | 0.71533304 | 0 |
| chr1 | 164643942 | 164643995 | 54     | 1  | 11 | 0 | 0.0331093  | 0          | 15 | 0 | 0.71538971 | 0 |
| chr1 | 164643995 | 164697258 | 53264  | 1  | 11 | 0 | 0.09334429 | 0          | 13 | 0 | 0.41271556 | 0 |
| chr1 | 164697258 | 164761881 | 64624  | 1  | 11 | 0 | 0.14385241 | 0          | 12 | 0 | 0.30102999 | 0 |
| chr1 | 164761881 | 164904489 | 142609 | 3  | 11 | 0 | 0.09334429 | 0          | 13 | 0 | 0.41271556 | 0 |
| chr1 | 164904489 | 164982393 | 77905  | 2  | 13 | 0 | 0.21200206 | 0          | 13 | 0 | 0.21200206 | 0 |
| chr1 | 164982393 | 165280442 | 298050 | 5  | 13 | 0 | 0.30102999 | 0          | 12 | 0 | 0.14385241 | 0 |
| chr1 | 165280442 | 165319618 | 39177  | 2  | 13 | 0 | 0.21200206 | 0          | 13 | 0 | 0.21200206 | 0 |
| chr1 | 165319618 | 165739928 | 420311 | 12 | 13 | 0 | 0.41271556 | 0          | 11 | 0 | 0.09334429 | 0 |
| chr1 | 165739928 | 165801395 | 61468  | 1  | 12 | 0 | 0.30102999 | 0          | 11 | 0 | 0.14385241 | 0 |
| chr1 | 165801395 | 165823211 | 21817  | 1  | 12 | 0 | 0.41314172 | 0          | 10 | 0 | 0.09290028 | 0 |
| chr1 | 165823211 | 165904815 | 81605  | 2  | 12 | 0 | 0.30102999 | 0          | 11 | 0 | 0.14385241 | 0 |
| chr1 | 165904815 | 166270637 | 365823 | 7  | 12 | 0 | 0.21227046 | 0          | 12 | 0 | 0.21227046 | 0 |
| chr1 | 166270637 | 166482444 | 211808 | 2  | 11 | 0 | 0.14385241 | 0          | 12 | 0 | 0.30102999 | 0 |
| chr1 | 166482444 | 166482503 | 60     | 1  | 12 | 0 | 0.21227046 | 0          | 12 | 0 | 0.21227046 | 0 |
| chr1 | 166482503 | 166664028 | 181526 | 4  | 11 | 0 | 0.14385241 | 0          | 12 | 0 | 0.30102999 | 0 |
| chr1 | 166664028 | 166732069 | 68042  | 1  | 10 | 0 | 0.09290028 | 0          | 12 | 0 | 0.41314172 | 0 |
| chr1 | 166732069 | 166967808 | 235740 | 7  | 11 | 0 | 0.14385241 | 0          | 12 | 0 | 0.30102999 | 0 |
| chr1 | 166967808 | 167047588 | 79781  | 3  | 11 | 0 | 0.09334429 | 0          | 13 | 0 | 0.41271556 | 0 |
| chr1 | 167047588 | 167047647 | 60     | 1  | 12 | 0 | 0.03209037 | 0          | 16 | 0 | 0.72109894 | 0 |
| chr1 | 167047647 | 167101001 | 53355  | 2  | 11 | 0 | 0.0574087  | 0          | 14 | 0 | 0.5498098  | 0 |
| chr1 | 167101001 | 167385239 | 284239 | 8  | 11 | 1 | 0.0331093  | 0.30102999 | 15 | 0 | 0.71538971 | 0 |
| chr1 | 167385239 | 167385298 | 60     | 1  | 12 | 1 | 0.03209037 | 0.30102999 | 16 | 0 | 0.72109894 | 0 |
| chr1 | 167385298 | 167461683 | 76388  | 2  | 11 | 1 | 0.03176779 | 0.30102999 | 16 | 0 | 0.91308053 | 0 |
| chr1 | 167461683 | 167461744 | 60     | 1  | 12 | 1 | 0.03209037 | 0.30102999 | 16 | 0 | 0.72109894 | 0 |
| chr1 | 167461744 | 167562534 | 100791 | 2  | 11 | 1 | 0.01767679 | 0.30102999 | 16 | 0 | 0.91308053 | 0 |
| chr1 | 167562534 | 167562593 | 60     | 1  | 11 | 1 | 0.00414024 | 0.30102999 | 19 | 0 | 1.7506523  | 0 |
| chr1 | 167562593 | 167614818 | 52226  | 1  | 11 | 1 | 0.00373523 | 0.30102999 | 18 | 0 | 1.42397267 | 0 |
| chr1 | 167614818 | 167614877 | 60     | 1  | 13 | 1 | 0.01518174 | 0.30102999 | 18 | 0 | 0.9446899  | 0 |
| chr1 | 167614877 | 167759326 | 144450 | 4  | 12 | 1 | 0.01667721 | 0.30102999 | 17 | 0 | 0.92532268 | 0 |
| chr1 | 167759326 | 167759385 | 60     | 1  | 13 | 1 | 0.03037338 | 0.30102999 | 17 | 0 | 0.73110763 | 0 |
| chr1 | 167759385 | 167792234 | 32850  | 1  | 12 | 1 | 0.01667721 | 0.30102999 | 17 | 0 | 0.92532268 | 0 |
| chr1 | 167792234 | 167825627 | 33394  | 1  | 12 | 1 | 0.03209037 | 0.30102999 | 16 | 0 | 0.72109894 | 0 |
| chr1 | 167825627 | 167870982 | 45356  | 3  | 13 | 1 | 0.05490675 | 0.30102999 | 0  | 0 | 0.55623409 | 0 |
| chr1 | 167870982 | 167901229 | 30248  | 1  | 12 | 1 | 0.0565833  | 0.30102999 | 15 | 0 | 0.55190077 | 0 |
| chr1 | 167901229 | 167921120 | 19892  | 2  | 12 | 1 | 0.03209037 | 0.30102999 | 16 | 0 | 0.72109894 | 0 |
| chr1 | 167921120 | 167957816 | 36697  | 1  | 11 | 1 | 0.01767679 | 0.30102999 | 16 | 0 | 0.91308053 | 0 |
| chr1 | 167957816 | 168020100 | 62285  | 2  | 10 | 1 | 0.01817691 | 0.30102999 | 15 | 0 | 0.90719478 | 0 |
| chr1 | 168020100 | 168020159 | 60     | 1  | 11 | 1 | 0.0331093  | 0.30102999 | 15 | 0 | 0.71538971 | 0 |
| chr1 | 168020159 | 168068778 | 48620  | 2  | 10 | 1 | 0.03344703 | 0.30102999 | 14 | 0 | 0.71533304 | 0 |
| chr1 | 168068778 | 168094753 | 25976  | 2  | 10 | 1 | 0.00909834 | 0.30102999 | 16 | 0 | 1.13428373 | 0 |
| chr1 | 168094753 | 168153189 | 58437  | 2  | 11 | 1 | 0.00373523 | 0.30102999 | 18 | 0 | 1.42397267 | 0 |
| chr1 | 168153189 | 168171284 | 18096  | 1  | 10 | 1 | 0.00413023 | 0.30102999 | 17 | 0 | 1.39918918 | 0 |
| chr1 | 168171284 | 168240910 | 69627  | 2  | 10 | 1 | 0.00909834 | 0.30102999 | 16 | 0 | 1.13428373 | 0 |
| chr1 | 168240910 | 168334254 | 93345  | 2  | 10 | 1 | 0.01817691 | 0.30102999 | 15 | 0 | 0.90719478 | 0 |
| chr1 | 168334254 | 168334313 | 60     | 1  | 12 | 1 | 0.01667721 | 0.30102999 | 17 | 0 | 0.92532268 | 0 |
| chr1 | 168334313 | 168368728 | 34416  | 1  | 11 | 1 | 0.00858986 | 0.30102999 | 17 | 0 | 1.14735594 | 0 |
| chr1 | 168368728 | 168368787 | 60     | 1  | 12 | 1 | 0.00778066 | 0.30102999 | 18 | 0 | 1.17038931 | 0 |
| chr1 | 168368787 | 168439535 | 70749  | 1  | 11 | 1 | 0.00373523 | 0.30102999 | 18 | 0 | 1.42397267 | 0 |
| chr1 | 168439535 | 168439594 | 60     | 1  | 12 | 1 | 0.00778066 | 0.30102999 | 18 | 0 | 1.17038931 | 0 |
| chr1 | 168439594 | 168505498 | 65905  | 1  | 11 | 1 | 0.00373523 | 0.30102999 | 18 | 0 | 1.42397267 | 0 |
| chr1 | 168505498 | 168547630 | 42133  | 1  | 11 | 1 | 0.01767679 | 0.30102999 | 16 | 0 | 0.91308053 | 0 |
| chr1 | 168547630 | 168547689 | 60     | 1  | 12 | 1 | 0.03209037 | 0.30102999 | 16 | 0 | 0.72109894 | 0 |
| chr1 | 168547689 | 168642532 | 94844  | 1  | 11 | 1 | 0.01767679 | 0.30102999 | 16 | 0 | 0.91308053 | 0 |
| chr1 | 168642532 | 168642591 | 60     | 1  | 11 | 1 | 0.00858986 | 0.30102999 | 17 | 0 | 1.14735594 | 0 |
| chr1 | 168642591 | 168665785 | 23195  | 1  | 11 | 1 | 0.01767679 | 0.30102999 | 16 | 0 | 0.91308053 | 0 |
| chr1 | 168665785 | 168697417 | 31633  | 2  | 11 | 1 |            |            |    |   |            |   |

|      |           |           |        |    |    |   |            |            |    |   |             |   |
|------|-----------|-----------|--------|----|----|---|------------|------------|----|---|-------------|---|
| chr1 | 171622017 | 171754834 | 132818 | 2  | 9  | 1 | 0.00433294 | 0.30102999 | 16 | 0 | 1.3873209   | 0 |
| chr1 | 171754834 | 171758230 | 3397   | 2  | 9  | 1 | 0.00183109 | 0.30102999 | 17 | 0 | 1.68336308  | 0 |
| chr1 | 171758230 | 171922237 | 164008 | 3  | 9  | 1 | 0.00433294 | 0.30102999 | 16 | 0 | 1.3873209   | 0 |
| chr1 | 171922237 | 171961411 | 39175  | 2  | 9  | 1 | 0.00183109 | 0.30102999 | 17 | 0 | 1.68336308  | 0 |
| chr1 | 171961411 | 172011180 | 49770  | 1  | 9  | 1 | 0.00433294 | 0.30102999 | 16 | 0 | 1.3873209   | 0 |
| chr1 | 172011180 | 172076969 | 65790  | 1  | 9  | 1 | 0.00926608 | 0.30102999 | 15 | 0 | 1.13004284  | 0 |
| chr1 | 172076969 | 172096461 | 19493  | 2  | 9  | 1 | 0.00433294 | 0.30102999 | 16 | 0 | 1.3873209   | 0 |
| chr1 | 172096461 | 172130663 | 34203  | 2  | 9  | 1 | 0.00183109 | 0.30102999 | 17 | 0 | 1.68336308  | 0 |
| chr1 | 172130663 | 172412433 | 281771 | 7  | 9  | 1 | 0.00433294 | 0.30102999 | 16 | 0 | 1.3873209   | 0 |
| chr1 | 172412433 | 172501817 | 89385  | 2  | 9  | 1 | 0.01817691 | 0.30102999 | 14 | 0 | 0.90719478  | 0 |
| chr1 | 172501817 | 172501871 | 55     | 1  | 9  | 1 | 0.00433294 | 0.30102999 | 16 | 0 | 1.3873209   | 0 |
| chr1 | 172501871 | 172526843 | 24973  | 1  | 9  | 1 | 0.00926608 | 0.30102999 | 15 | 0 | 1.13004284  | 0 |
| chr1 | 172526843 | 172579985 | 53143  | 2  | 8  | 1 | 0.00433294 | 0.30102999 | 15 | 0 | 1.3873209   | 0 |
| chr1 | 172579985 | 172634529 | 54545  | 2  | 8  | 1 | 0.00909834 | 0.30102999 | 14 | 0 | 1.13428373  | 0 |
| chr1 | 172634529 | 172728910 | 94382  | 4  | 8  | 1 | 0.00433294 | 0.30102999 | 15 | 0 | 1.3873209   | 0 |
| chr1 | 172728910 | 172887687 | 158778 | 8  | 2  | 2 | 0.00188722 | 0.61140001 | 16 | 0 | 1.67551277  | 0 |
| chr1 | 172887687 | 173013018 | 125332 | 3  | 8  | 2 | 0.00433294 | 0.61140001 | 15 | 0 | 1.3873209   | 0 |
| chr1 | 173013018 | 173154984 | 141967 | 4  | 8  | 2 | 0.00188722 | 0.61140001 | 16 | 0 | 1.67551277  | 0 |
| chr1 | 173154984 | 173195574 | 40591  | 3  | 8  | 2 | 0.00433294 | 0.61140001 | 15 | 0 | 1.3873209   | 0 |
| chr1 | 173195574 | 173272080 | 76507  | 8  | 2  | 2 | 0.00188722 | 0.61140001 | 16 | 0 | 1.67551277  | 0 |
| chr1 | 173272080 | 173331115 | 59036  | 1  | 8  | 2 | 0.00433294 | 0.61140001 | 15 | 0 | 1.3873209   | 0 |
| chr1 | 173331115 | 173452803 | 121689 | 2  | 8  | 2 | 0.00909834 | 0.61140001 | 14 | 0 | 1.13428373  | 0 |
| chr1 | 173452803 | 173490449 | 37647  | 2  | 8  | 2 | 0.00433294 | 0.61140001 | 15 | 0 | 1.3873209   | 0 |
| chr1 | 173490449 | 173490508 | 60     | 1  | 8  | 2 | 0.00188722 | 0.61140001 | 16 | 0 | 1.67551277  | 0 |
| chr1 | 173490508 | 173545877 | 55370  | 2  | 8  | 2 | 0.00433294 | 0.61140001 | 15 | 0 | 1.3873209   | 0 |
| chr1 | 173545877 | 173884316 | 338440 | 12 | 8  | 2 | 0.00909834 | 0.61140001 | 14 | 0 | 1.13428373  | 0 |
| chr1 | 173884316 | 174002163 | 117848 | 2  | 8  | 2 | 0.01767679 | 0.61140001 | 13 | 0 | 0.913308053 | 0 |
| chr1 | 174002163 | 174124974 | 122812 | 3  | 8  | 3 | 0.01767679 | 0.93173516 | 13 | 0 | 0.913308053 | 0 |
| chr1 | 174124974 | 174265632 | 140659 | 2  | 6  | 3 | 0.00778066 | 0.93173516 | 12 | 0 | 1.17038931  | 0 |
| chr1 | 174265632 | 174265691 | 60     | 1  | 7  | 3 | 0.01677211 | 0.93173516 | 12 | 0 | 0.92532268  | 0 |
| chr1 | 174265691 | 174340225 | 74535  | 1  | 6  | 3 | 0.00778066 | 0.93173516 | 12 | 0 | 1.17038931  | 0 |
| chr1 | 174340225 | 174417647 | 77423  | 1  | 6  | 3 | 0.01518174 | 0.93173516 | 11 | 0 | 0.9449689   | 0 |
| chr1 | 174417647 | 174468168 | 50522  | 2  | 6  | 3 | 0.02793176 | 0.93173516 | 10 | 0 | 0.74627054  | 0 |
| chr1 | 174468168 | 174507537 | 39370  | 2  | 6  | 3 | 0.01518174 | 0.93173516 | 11 | 0 | 0.9449689   | 0 |
| chr1 | 174507537 | 174507596 | 60     | 1  | 7  | 3 | 0.03037338 | 0.93173516 | 11 | 0 | 0.73110763  | 0 |
| chr1 | 174507596 | 174553313 | 45718  | 1  | 6  | 3 | 0.01518174 | 0.93173516 | 11 | 0 | 0.9449689   | 0 |
| chr1 | 174553313 | 174606489 | 53177  | 1  | 6  | 2 | 0.01518174 | 0.61140001 | 11 | 0 | 0.9449689   | 0 |
| chr1 | 174606489 | 174709489 | 103001 | 3  | 7  | 2 | 0.03037338 | 0.61140001 | 11 | 0 | 0.73110763  | 0 |
| chr1 | 174709489 | 174709546 | 58     | 1  | 7  | 2 | 0.01667721 | 0.61140001 | 12 | 0 | 0.92532268  | 0 |
| chr1 | 174709546 | 174862913 | 153368 | 4  | 6  | 2 | 0.01518174 | 0.61140001 | 11 | 0 | 0.9449689   | 0 |
| chr1 | 174862913 | 174926542 | 63630  | 3  | 6  | 2 | 0.00778066 | 0.61140001 | 12 | 0 | 1.17038931  | 0 |
| chr1 | 174926542 | 174961849 | 35308  | 1  | 6  | 2 | 0.01518174 | 0.61140001 | 11 | 0 | 0.9449689   | 0 |
| chr1 | 174961849 | 174987608 | 25760  | 3  | 7  | 2 | 0.03037338 | 0.61140001 | 11 | 0 | 0.73110763  | 0 |
| chr1 | 174987608 | 175134107 | 146500 | 3  | 6  | 2 | 0.01518174 | 0.61140001 | 11 | 0 | 0.9449689   | 0 |
| chr1 | 175134107 | 175176432 | 42326  | 3  | 6  | 2 | 0.00778066 | 0.61140001 | 12 | 0 | 1.17038931  | 0 |
| chr1 | 175176432 | 175310373 | 133942 | 2  | 6  | 2 | 0.01518174 | 0.61140001 | 11 | 0 | 0.9449689   | 0 |
| chr1 | 175310373 | 175332874 | 22502  | 2  | 6  | 2 | 0.00778066 | 0.61140001 | 12 | 0 | 1.17038931  | 0 |
| chr1 | 175332874 | 175497460 | 164587 | 3  | 6  | 2 | 0.01518174 | 0.61140001 | 11 | 0 | 0.9449689   | 0 |
| chr1 | 175497460 | 175535442 | 37983  | 2  | 6  | 2 | 0.02793176 | 0.61140001 | 10 | 0 | 0.74627054  | 0 |
| chr1 | 175535442 | 175581791 | 46350  | 2  | 6  | 2 | 0.01518174 | 0.61140001 | 11 | 0 | 0.9449689   | 0 |
| chr1 | 175581791 | 175958529 | 376739 | 7  | 7  | 2 | 0.03037338 | 0.61140001 | 11 | 0 | 0.73110763  | 0 |
| chr1 | 175958529 | 176178810 | 220282 | 6  | 6  | 2 | 0.01518174 | 0.61140001 | 11 | 0 | 0.9449689   | 0 |
| chr1 | 176178810 | 176178869 | 60     | 1  | 6  | 2 | 0.00778066 | 0.61140001 | 12 | 0 | 1.17038931  | 0 |
| chr1 | 176178869 | 176432507 | 253639 | 4  | 6  | 2 | 0.01518174 | 0.61140001 | 11 | 0 | 0.9449689   | 0 |
| chr1 | 176432507 | 176630878 | 198372 | 5  | 6  | 2 | 0.00778066 | 0.61140001 | 12 | 0 | 1.17038931  | 0 |
| chr1 | 176630878 | 176716297 | 85420  | 2  | 6  | 2 | 0.01518174 | 0.61140001 | 11 | 0 | 0.9449689   | 0 |
| chr1 | 176716297 | 176811726 | 95430  | 2  | 6  | 2 | 0.02793176 | 0.61140001 | 10 | 0 | 0.74627054  | 0 |
| chr1 | 176811726 | 176926623 | 114898 | 2  | 5  | 2 | 0.01320236 | 0.61140001 | 10 | 0 | 0.97390707  | 0 |
| chr1 | 176926623 | 177057284 | 130662 | 4  | 6  | 2 | 0.02793176 | 0.61140001 | 10 | 0 | 0.74627054  | 0 |
| chr1 | 177057284 | 177456183 | 398900 | 9  | 6  | 2 | 0.00778066 | 0.61140001 | 12 | 0 | 1.17038931  | 0 |
| chr1 | 177456183 | 177456242 | 60     | 1  | 6  | 2 | 0.00166733 | 0.61140001 | 14 | 0 | 1.70763027  | 0 |
| chr1 | 177456242 | 177800358 | 344117 | 2  | 6  | 2 | 0.00778066 | 0.61140001 | 12 | 0 | 1.17038931  | 0 |
| chr1 | 177800358 | 177800417 | 60     | 1  | 7  | 2 | 0.00859896 | 0.61140001 | 13 | 0 | 1.14735594  | 0 |
| chr1 | 177800417 | 177898011 | 97595  | 1  | 6  | 2 | 0.02793176 | 0.61140001 | 10 | 0 | 0.74627054  | 0 |
| chr1 | 177898011 | 177974860 | 76850  | 5  | 7  | 2 | 0.05232577 | 0.61140001 | 10 | 0 | 0.56314362  | 0 |
| chr1 | 177974860 | 177974919 | 60     | 1  | 6  | 2 | 0.05490675 | 0.61140001 | 11 | 0 | 0.56314362  | 0 |
| chr1 | 177974919 | 178065328 | 90410  | 2  | 7  | 1 | 0.05232577 | 0.30102999 | 10 | 0 | 0.56314362  | 0 |
| chr1 | 178065328 | 178065387 | 60     | 1  | 7  | 2 | 0.05490675 | 0.61140001 | 11 | 0 | 0.56314362  | 0 |
| chr1 | 178065387 | 178196998 | 131612 | 2  | 7  | 2 | 0.03037338 | 0.61140001 | 11 | 0 | 0.73110763  | 0 |
| chr1 | 178196998 | 178248438 | 51441  | 1  | 7  | 2 | 0.08584816 | 0.61140001 | 9  | 0 | 0.42015402  | 0 |
| chr1 | 178248438 | 178315977 | 67540  | 2  | 8  | 2 | 0.13872638 | 0.61140001 | 9  | 0 | 0.30102999  | 0 |
| chr1 | 178315977 | 178443113 | 127137 | 2  | 7  | 2 | 0.08584816 | 0.61140001 | 9  | 0 | 0.42015402  | 0 |
| chr1 | 178443113 | 178490969 | 47857  | 2  | 7  | 2 | 0.13499366 | 0.61140001 | 8  | 0 | 0.30102999  | 0 |
| chr1 | 178490969 | 178517686 | 26718  | 2  | 7  | 2 | 0.08584816 | 0.61140001 | 9  | 0 | 0.42015402  | 0 |
| chr1 | 178517686 | 178520811 | 3126   | 2  | 8  | 2 | 0.13872638 | 0.61140001 | 9  | 0 | 0.30102999  | 0 |
| chr1 | 178520811 | 178671697 | 150887 | 1  | 8  | 1 | 0.20746554 | 0.30102999 | 8  | 0 | 0.20746554  | 0 |
| chr1 | 178671697 | 178708604 | 36908  | 2  | 9  | 1 | 0.09154957 | 0.30102999 | 11 | 0 | 0.41444892  | 0 |
| chr1 | 178708604 | 178777213 | 68610  | 2  | 9  | 2 | 0.09154957 | 0.61140001 | 11 | 0 | 0.41444892  | 0 |
| chr1 | 178777213 | 178777272 | 60     | 1  | 9  | 2 | 0.0565833  | 0.61140001 | 12 | 0 | 0.55190077  | 0 |
| chr1 | 178777272 | 178855220 | 77949  | 4  | 9  | 2 | 0.09154957 | 0.61140001 | 11 | 0 | 0.41444892  | 0 |
| chr1 | 178855220 | 178855279 | 60     | 1  | 10 | 2 | 0.14303407 | 0.61140001 | 11 | 0 | 0.30102999  | 0 |
| chr1 | 178855279 | 178885805 | 30527  | 1  | 9  | 2 | 0.09154957 | 0.61140001 | 11 | 0 | 0.41444892  | 0 |
| chr1 | 178885805 | 179063269 | 177465 | 4  | 8  | 2 | 0.08923391 | 0.61140001 | 10 | 0 | 0.4167287   | 0 |
| chr1 | 179063269 | 179111998 | 48730  | 2  | 8  | 2 | 0.13872638 | 0.61140001 | 9  | 0 | 0.30102999  | 0 |
| chr1 | 179111998 | 179185186 | 73189  | 4  | 8  | 2 | 0.08923391 | 0.61140001 | 10 | 0 | 0.4167287   | 0 |
| chr1 | 179185186 | 179256760 | 71575  | 2  | 8  | 2 | 0.13872638 | 0.61140001 | 9  | 0 | 0.30102999  | 0 |
| chr1 | 179256760 | 179256819 | 60     | 1  | 8  | 2 | 0.05490675 | 0.61140001 | 11 | 0 | 0.56314362  | 0 |
| chr1 | 179256819 | 179337729 | 80911  | 2  | 8  | 2 | 0.08923391 | 0.61140001 | 10 | 0 | 0.4167287   | 0 |
| chr1 | 179337729 | 179452353 | 114625 | 5  | 8  | 2 | 0.05490675 | 0.61140001 | 11 | 0 | 0.56314362  | 0 |
| chr1 | 179452353 | 179523750 | 71938  | 3  | 8  | 2 | 0.08923391 | 0.61140001 | 10 | 0 | 0.4167287   | 0 |
| chr1 | 179523750 | 179562879 | 39130  | 3  | 9  | 2 | 0.09154957 | 0.61140001 | 11 | 0 | 0.41444892  | 0 |
| chr1 | 179562879 | 17964197  | 301319 | 10 | 9  | 1 | 0.09154957 | 0.30102999 | 11 | 0 | 0.41444892  | 0 |
| chr1 | 17964197  | 179955613 | 91417  | 2  | 9  | 0 | 0.09154957 | 0          | 11 | 0 | 0.41444892  | 0 |
| chr1 | 179955613 | 180010831 | 55219  | 1  | 8  | 0 | 0.05490675 | 0          | 11 | 0 | 0.56314362  | 0 |
|      |           |           |        |    |    |   |            |            |    |   |             |   |

|      |           |           |        |   |   |   |            |            |    |   |            |   |
|------|-----------|-----------|--------|---|---|---|------------|------------|----|---|------------|---|
| chr1 | 182355914 | 182393883 | 37970  | 4 | 9 | 0 | 0.0565833  | 0          | 12 | 0 | 0.55190077 | 0 |
| chr1 | 182393883 | 182429176 | 35294  | 2 | 9 | 0 | 0.0331093  | 0          | 13 | 0 | 0.71538971 | 0 |
| chr1 | 182429176 | 182555461 | 126286 | 6 | 9 | 0 | 0.09154957 | 0          | 11 | 0 | 0.41444892 | 0 |
| chr1 | 182555461 | 182664454 | 108994 | 4 | 9 | 0 | 0.0565833  | 0          | 12 | 0 | 0.55190077 | 0 |
| chr1 | 182664454 | 182664513 | 60     | 1 | 9 | 0 | 0.0331093  | 0          | 13 | 0 | 0.71538971 | 0 |
| chr1 | 182664513 | 182782726 | 118214 | 2 | 9 | 0 | 0.09154957 | 0          | 11 | 0 | 0.41444892 | 0 |
| chr1 | 182782726 | 182811709 | 28984  | 2 | 9 | 0 | 0.0331093  | 0          | 13 | 0 | 0.71538971 | 0 |
| chr1 | 182811709 | 182888856 | 77148  | 2 | 9 | 0 | 0.0565833  | 0          | 12 | 0 | 0.55190077 | 0 |
| chr1 | 182888856 | 182888915 | 60     | 1 | 9 | 0 | 0.0331093  | 0          | 13 | 0 | 0.71538971 | 0 |
| chr1 | 182888915 | 182920485 | 31571  | 1 | 9 | 0 | 0.0565833  | 0          | 12 | 0 | 0.55190077 | 0 |
| chr1 | 182920485 | 182920544 | 60     | 1 | 9 | 0 | 0.0331093  | 0          | 13 | 0 | 0.71538971 | 0 |
| chr1 | 182920544 | 182988513 | 67970  | 2 | 9 | 0 | 0.0565833  | 0          | 12 | 0 | 0.55190077 | 0 |
| chr1 | 182988513 | 183044082 | 55570  | 2 | 8 | 0 | 0.02209037 | 0          | 12 | 0 | 0.72109894 | 0 |
| chr1 | 183044082 | 183213332 | 169251 | 6 | 8 | 0 | 0.01767679 | 0          | 13 | 0 | 0.91308053 | 0 |
| chr1 | 183213332 | 183299871 | 86540  | 2 | 8 | 0 | 0.02209037 | 0          | 12 | 0 | 0.72109894 | 0 |
| chr1 | 183299871 | 183485066 | 185196 | 6 | 8 | 0 | 0.01767679 | 0          | 13 | 0 | 0.91308053 | 0 |
| chr1 | 183485066 | 183525229 | 40164  | 3 | 8 | 0 | 0.00909834 | 0          | 14 | 0 | 1.13428373 | 0 |
| chr1 | 183525229 | 183623881 | 98653  | 2 | 8 | 0 | 0.01767679 | 0          | 13 | 0 | 0.91308053 | 0 |
| chr1 | 183623881 | 183680966 | 57086  | 2 | 8 | 0 | 0.0331093  | 0          | 13 | 0 | 0.71538971 | 0 |
| chr1 | 183680966 | 183681023 | 60     | 1 | 9 | 0 | 0.0331093  | 0          | 14 | 0 | 0.90719478 | 0 |
| chr1 | 183681023 | 183775552 | 94528  | 2 | 9 | 0 | 0.0331093  | 0          | 13 | 0 | 0.71538971 | 0 |
| chr1 | 183775552 | 183775602 | 51     | 1 | 9 | 0 | 0.00926608 | 0          | 15 | 0 | 1.13004284 | 0 |
| chr1 | 183775602 | 183896269 | 120668 | 3 | 9 | 0 | 0.01817691 | 0          | 14 | 0 | 0.90719478 | 0 |
| chr1 | 183896269 | 183923887 | 27619  | 1 | 9 | 0 | 0.0331093  | 0          | 13 | 0 | 0.71538971 | 0 |
| chr1 | 183923887 | 183947592 | 23706  | 2 | 9 | 0 | 0.01817691 | 0          | 14 | 0 | 0.90719478 | 0 |
| chr1 | 183947592 | 183947651 | 60     | 1 | 9 | 0 | 0.00926608 | 0          | 15 | 0 | 1.13004284 | 0 |
| chr1 | 183947651 | 184021511 | 73861  | 2 | 9 | 0 | 0.01817691 | 0          | 14 | 0 | 0.90719478 | 0 |
| chr1 | 184021511 | 184091213 | 69703  | 2 | 8 | 0 | 0.02209037 | 0          | 12 | 0 | 0.72109894 | 0 |
| chr1 | 184091213 | 184208950 | 117738 | 2 | 8 | 0 | 0.00909834 | 0          | 14 | 0 | 1.13428373 | 0 |
| chr1 | 184208950 | 184319011 | 110062 | 2 | 8 | 0 | 0.00433294 | 0          | 15 | 0 | 1.3873209  | 0 |
| chr1 | 184319011 | 184319070 | 60     | 1 | 8 | 1 | 0.00188722 | 0.30102999 | 16 | 0 | 1.67551277 | 0 |
| chr1 | 184319070 | 184431762 | 112693 | 2 | 8 | 1 | 0.00433294 | 0.30102999 | 15 | 0 | 1.3873209  | 0 |
| chr1 | 184431762 | 184476696 | 44935  | 2 | 9 | 1 | 0.00926608 | 0.30102999 | 15 | 0 | 1.13004284 | 0 |
| chr1 | 184476696 | 184476752 | 57     | 1 | 9 | 1 | 0.00433294 | 0.30102999 | 16 | 0 | 1.3873209  | 0 |
| chr1 | 184476752 | 184512910 | 36159  | 1 | 9 | 1 | 0.00926608 | 0.30102999 | 15 | 0 | 1.13004284 | 0 |
| chr1 | 184512910 | 184662134 | 149225 | 4 | 8 | 1 | 0.00433294 | 0.30102999 | 15 | 0 | 1.3873209  | 0 |
| chr1 | 184662134 | 184723111 | 60978  | 2 | 8 | 1 | 0.01767679 | 0.30102999 | 13 | 0 | 0.91308053 | 0 |
| chr1 | 184723111 | 184832585 | 109475 | 4 | 8 | 1 | 0.00909834 | 0.30102999 | 14 | 0 | 1.13428373 | 0 |
| chr1 | 184832585 | 184919870 | 87286  | 2 | 8 | 1 | 0.01767679 | 0.30102999 | 13 | 0 | 0.91308053 | 0 |
| chr1 | 184919870 | 184983650 | 63781  | 3 | 8 | 1 | 0.00909834 | 0.30102999 | 14 | 0 | 1.13428373 | 0 |
| chr1 | 184983650 | 185029069 | 45420  | 1 | 8 | 1 | 0.01767679 | 0.30102999 | 13 | 0 | 0.91308053 | 0 |
| chr1 | 185029069 | 185106572 | 77504  | 2 | 8 | 0 | 0.01767679 | 0.30102999 | 13 | 0 | 0.91308053 | 0 |
| chr1 | 185106572 | 185125974 | 19403  | 2 | 8 | 1 | 0.01767679 | 0.30102999 | 13 | 0 | 0.91308053 | 0 |
| chr1 | 185125974 | 185149558 | 23585  | 2 | 8 | 1 | 0.00909834 | 0.30102999 | 14 | 0 | 1.13428373 | 0 |
| chr1 | 185149558 | 185240518 | 90961  | 3 | 8 | 0 | 0.01767679 | 0          | 13 | 0 | 0.91308053 | 0 |
| chr1 | 185240518 | 185267168 | 26651  | 2 | 7 | 0 | 0.03037338 | 0          | 11 | 0 | 0.73110763 | 0 |
| chr1 | 185267168 | 185276218 | 9051   | 2 | 8 | 0 | 0.05490675 | 0          | 11 | 0 | 0.55623409 | 0 |
| chr1 | 185276218 | 185278266 | 2049   | 2 | 8 | 0 | 0.01767679 | 0          | 13 | 0 | 0.91308053 | 0 |
| chr1 | 185278266 | 185453551 | 175286 | 3 | 8 | 0 | 0.00909834 | 0          | 14 | 0 | 1.13428373 | 0 |
| chr1 | 185453551 | 185576474 | 122924 | 2 | 8 | 1 | 0.00909834 | 0.30102999 | 14 | 0 | 1.13428373 | 0 |
| chr1 | 185576474 | 185926188 | 349715 | 6 | 8 | 1 | 0.01767679 | 0.30102999 | 13 | 0 | 0.91308053 | 0 |
| chr1 | 185926188 | 185926247 | 60     | 1 | 8 | 1 | 0.00909834 | 0.30102999 | 14 | 0 | 1.13428373 | 0 |
| chr1 | 185926247 | 185962462 | 36216  | 2 | 8 | 0 | 0.00909834 | 0          | 14 | 0 | 1.13428373 | 0 |
| chr1 | 185962462 | 186060881 | 98420  | 3 | 8 | 1 | 0.00909834 | 0.30102999 | 14 | 0 | 1.13428373 | 0 |
| chr1 | 186060881 | 186113517 | 52637  | 1 | 8 | 1 | 0.01767679 | 0.30102999 | 13 | 0 | 0.91308053 | 0 |
| chr1 | 186113517 | 186123104 | 9588   | 2 | 8 | 1 | 0.00909834 | 0.30102999 | 14 | 0 | 1.13428373 | 0 |
| chr1 | 186123104 | 186173009 | 49906  | 1 | 7 | 1 | 0.00859896 | 0.30102999 | 13 | 0 | 1.14735594 | 0 |
| chr1 | 186173009 | 186257228 | 84220  | 1 | 6 | 1 | 0.00373523 | 0.30102999 | 13 | 0 | 1.42397267 | 0 |
| chr1 | 186257228 | 186257287 | 60     | 1 | 6 | 2 | 0.00373523 | 0.61140001 | 13 | 0 | 1.42397267 | 0 |
| chr1 | 186257287 | 186273308 | 16022  | 1 | 6 | 0 | 0.00373523 | 0          | 13 | 0 | 1.42397267 | 0 |
| chr1 | 186273308 | 186278235 | 4928   | 3 | 7 | 0 | 0.00859896 | 0          | 13 | 0 | 1.14735594 | 0 |
| chr1 | 186278235 | 186278294 | 60     | 1 | 7 | 1 | 0.00859896 | 0.30102999 | 13 | 0 | 1.14735594 | 0 |
| chr1 | 186278294 | 186296518 | 18225  | 1 | 6 | 0 | 0.00373523 | 0          | 13 | 0 | 1.42397267 | 0 |
| chr1 | 186296518 | 186421943 | 125426 | 8 | 6 | 0 | 0.00167866 | 0          | 14 | 0 | 1.70763027 | 0 |
| chr1 | 186421943 | 186459764 | 127822 | 1 | 7 | 0 | 0.00778066 | 0          | 12 | 0 | 0.71538971 | 0 |
| chr1 | 186459764 | 186785078 | 235315 | 7 | 7 | 0 | 0.01657721 | 0          | 12 | 0 | 0.92532268 | 0 |
| chr1 | 186785078 | 186785137 | 60     | 1 | 7 | 0 | 0.00859896 | 0          | 13 | 0 | 1.14735594 | 0 |
| chr1 | 186785137 | 186863228 | 78092  | 2 | 7 | 0 | 0.01657721 | 0          | 12 | 0 | 0.92532268 | 0 |
| chr1 | 186863228 | 186863287 | 60     | 1 | 7 | 0 | 0.00859896 | 0          | 13 | 0 | 1.14735594 | 0 |
| chr1 | 186863287 | 186934611 | 71325  | 2 | 6 | 0 | 0.00778066 | 0          | 12 | 0 | 1.17038931 | 0 |
| chr1 | 186934611 | 187074744 | 140134 | 2 | 6 | 0 | 0.01518174 | 0          | 11 | 0 | 0.94496889 | 0 |
| chr1 | 187074744 | 187128418 | 143675 | 1 | 6 | 0 | 0.02793176 | 0          | 10 | 0 | 0.74627054 | 0 |
| chr1 | 187128418 | 187128477 | 60     | 1 | 6 | 1 | 0.02793176 | 0.30102999 | 10 | 0 | 0.74627054 | 0 |
| chr1 | 187128477 | 187290553 | 72077  | 1 | 6 | 0 | 0.02793176 | 0          | 10 | 0 | 0.74627054 | 0 |
| chr1 | 187290553 | 187540051 | 249499 | 3 | 6 | 0 | 0.01518174 | 0          | 11 | 0 | 0.94496889 | 0 |
| chr1 | 187540051 | 187615965 | 75915  | 1 | 3 | 0 | 0.00170589 | 0          | 10 | 0 | 1.61091002 | 0 |
| chr1 | 187615965 | 187813722 | 197758 | 2 | 3 | 0 | 0.01598258 | 0          | 7  | 0 | 0.84395715 | 0 |
| chr1 | 187813722 | 187956699 | 142978 | 1 | 3 | 0 | 0.03070643 | 0          | 6  | 0 | 0.63695542 | 0 |
| chr1 | 187956699 | 188206008 | 249310 | 2 | 3 | 0 | 0.05570724 | 0          | 5  | 0 | 0.45545077 | 0 |
| chr1 | 188206008 | 188391393 | 185386 | 1 | 3 | 0 | 0.10122019 | 0          | 4  | 0 | 0.30102999 | 0 |
| chr1 | 188391393 | 188574502 | 183110 | 2 | 3 | 0 | 0.05570724 | 0          | 5  | 0 | 0.45545077 | 0 |
| chr1 | 188574502 | 188659081 | 84580  | 1 | 1 | 0 | 0.02438896 | 0          | 3  | 0 | 0.51676182 | 0 |
| chr1 | 188659081 | 188786712 | 127632 | 2 | 1 | 0 | 0.01091641 | 0          | 4  | 0 | 0.76005302 | 0 |
| chr1 | 188786712 | 189101185 | 314474 | 2 | 1 | 0 | 0.1218695  | 0          | 1  | 0 | 0.1218695  | 0 |
| chr1 | 189101185 | 189101244 | 60     | 1 | 1 | 0 | 0.01091641 | 0          | 4  | 0 | 0.76005302 | 0 |
| chr1 | 189101244 | 189366715 | 265472 | 3 | 1 | 0 | 0.02438896 | 0          | 3  | 0 | 0.51676182 | 0 |
| chr1 | 189366715 | 189366774 | 60     | 2 | 0 | 0 | 0.02162467 | 0          | 5  | 0 | 0.68214471 | 0 |
| chr1 | 189366774 | 189574701 | 207928 | 1 | 2 | 0 | 0.0429175  | 0          | 4  | 0 | 0.47744371 | 0 |
| chr1 | 189574701 | 189574760 | 60     | 1 | 3 | 0 | 0.10122019 | 0          | 4  | 0 | 0.30102999 | 0 |
| chr1 | 189574760 | 189770699 | 195940 | 1 | 1 | 0 | 0.01091641 | 0          | 4  | 0 | 0.76005302 | 0 |
| chr1 | 189770699 | 190005334 | 234636 | 3 | 1 | 0 | 0.00478973 | 0          | 5  | 0 | 1.02643191 | 0 |
| chr1 | 190005334 | 190086193 | 80860  | 2 | 2 | 0 | 0.01053319 | 0          | 6  | 0 | 0.91219088 | 0 |
| chr1 | 190086193 | 190218321 | 132129 | 2 | 1 | 0 | 0.00204627 | 0          | 6  | 0 | 1.31360226 | 0 |
| chr1 | 190218321 | 190218380 | 60     | 1 | 5 | 0 | 0.07511598 | 0          | 7  | 0 | 0.43181735 | 0 |
| chr1 | 190218380 | 190319553 | 101174 | 2 | 2 | 0 | 0.01053319 | 0          | 6  | 0 | 0.91219088 | 0 |
| chr1 | 190319553 | 190394529 | 74977  | 1 | 1 | 0 | 0.00478973 | 0          | 5  | 0 | 1.02643191 | 0 |
| chr1 | 190394529 | 190624423 | 229895 | 3 | 2 | 0 | 0.02162467 | 0          | 5  | 0 | 0.68214471 | 0 |
| chr1 | 190624423 | 190705646 | 81224  | 2 | 3 | 0 | 0.0079614  | 0          | 8  | 0 | 1.07548421 | 0 |
| chr1 | 190705646 | 191102159 | 396514 | 4 | 2 | 0 | 0.00221948 | 0          | 8  | 0 | 1.44210395 | 0 |
| chr1 | 1         |           |        |   |   |   |            |            |    |   |            |   |

|      |           |           |        |     |    |   |            |            |    |   |            |   |
|------|-----------|-----------|--------|-----|----|---|------------|------------|----|---|------------|---|
| chr1 | 193202105 | 193277676 | 75572  | 3   | 4  | 0 | 4.45E-04   | 0          | 13 | 0 | 2.13824703 | 0 |
| chr1 | 193277676 | 193489523 | 211848 | 1   | 2  | 0 | 0.00493743 | 0          | 7  | 0 | 1.16581773 | 0 |
| chr1 | 193489523 | 193725938 | 236416 | 2   | 1  | 0 | 0.00478973 | 0          | 5  | 0 | 1.02643191 | 0 |
| chr1 | 193725938 | 193725997 | 60     | 1   | 2  | 0 | 0.00221948 | 0          | 8  | 0 | 1.44210395 | 0 |
| chr1 | 193725997 | 193878906 | 152910 | 1   | 2  | 0 | 0.0105319  | 0          | 6  | 0 | 0.91219088 | 0 |
| chr1 | 193878906 | 194198125 | 319220 | 2   | 1  | 0 | 0.00478973 | 0          | 5  | 0 | 1.02643191 | 0 |
| chr1 | 194198125 | 194583280 | 385156 | 3   | 0  | 0 | 0          | 0          | 2  | 0 | 0.61140001 | 0 |
| chr1 | 194583280 | 195051375 | 468096 | 4   | 0  | 0 | 0          | 0          | 3  | 0 | 0.93173516 | 0 |
| chr1 | 195051375 | 195223664 | 172290 | 1   | 0  | 0 | 0          | 0          | 2  | 0 | 0.61140001 | 0 |
| chr1 | 195223664 | 195433626 | 209963 | 2   | 1  | 0 | 0.01091641 | 0          | 4  | 0 | 0.76005302 | 0 |
| chr1 | 195433626 | 195433685 | 60     | 1   | 2  | 0 | 0.02162467 | 0          | 5  | 0 | 0.68214471 | 0 |
| chr1 | 195433685 | 195687659 | 253975 | 1   | 1  | 0 | 0.00478973 | 0          | 5  | 0 | 1.02643191 | 0 |
| chr1 | 195687659 | 195687718 | 60     | 1   | 1  | 0 | 0.00204627 | 0          | 6  | 0 | 1.31360226 | 0 |
| chr1 | 195687718 | 195914114 | 226397 | 1   | 1  | 0 | 0.00478973 | 0          | 5  | 0 | 1.02643191 | 0 |
| chr1 | 195914114 | 196102198 | 188085 | 2   | 1  | 0 | 0.00204627 | 0          | 6  | 0 | 1.31360226 | 0 |
| chr1 | 196102198 | 196204178 | 101981 | 2   | 2  | 0 | 0.00493743 | 0          | 7  | 0 | 1.16581773 | 0 |
| chr1 | 196204178 | 196244549 | 40372  | 2   | 2  | 0 | 0.00221948 | 0          | 8  | 0 | 1.44210395 | 0 |
| chr1 | 196244549 | 196244608 | 60     | 1   | 3  | 0 | 0.00170589 | 0          | 10 | 0 | 1.61091002 | 0 |
| chr1 | 196244608 | 196341182 | 96575  | 2   | 2  | 0 | 3.90E-04   | 0          | 10 | 0 | 2.0620585  | 0 |
| chr1 | 196341182 | 196341241 | 60     | 1   | 3  | 1 | 0.00170589 | 0.30102999 | 10 | 0 | 1.61091002 | 0 |
| chr1 | 196341241 | 196418359 | 78119  | 1   | 3  | 0 | 0.00170589 | 0          | 10 | 0 | 1.61091002 | 0 |
| chr1 | 196418359 | 196573623 | 154267 | 3   | 2  | 0 | 9.54E-04   | 0          | 9  | 0 | 1.74076927 | 0 |
| chr1 | 196573623 | 196573684 | 60     | 1   | 4  | 1 | 0.00247414 | 0.30102999 | 11 | 0 | 1.52371709 | 0 |
| chr1 | 196573684 | 196657666 | 83983  | 2   | 4  | 1 | 0.01077081 | 0.30102999 | 9  | 0 | 1.01542894 | 0 |
| chr1 | 196657666 | 196711090 | 53425  | 3   | 5  | 1 | 0.01320236 | 0.30102999 | 10 | 0 | 0.97390707 | 0 |
| chr1 | 196711090 | 196780309 | 69220  | 2   | 5  | 1 | 0.00666883 | 0.30102999 | 11 | 0 | 1.20557689 | 0 |
| chr1 | 196780309 | 196883398 | 103090 | 3   | 5  | 1 | 0.00141024 | 0.30102999 | 13 | 0 | 1.7506523  | 0 |
| chr1 | 196883398 | 197111575 | 228178 | 9   | 5  | 1 | 0.00666883 | 0.30102999 | 11 | 0 | 1.20557689 | 0 |
| chr1 | 197111575 | 197111634 | 60     | 1   | 5  | 1 | 0.00317045 | 0.30102999 | 12 | 0 | 1.46403142 | 0 |
| chr1 | 197111634 | 197237527 | 125894 | 4   | 5  | 0 | 0.00317045 | 0          | 12 | 0 | 1.46403142 | 0 |
| chr1 | 197237527 | 197272011 | 34485  | 2   | 5  | 0 | 5.83E-04   | 0          | 14 | 0 | 2.06733314 | 0 |
| chr1 | 197272011 | 197313461 | 41451  | 2   | 5  | 0 | 2.22E-04   | 0          | 15 | 0 | 2.41659593 | 0 |
| chr1 | 197313461 | 197356976 | 43516  | 1   | 5  | 0 | 5.83E-04   | 0          | 14 | 0 | 2.06733314 | 0 |
| chr1 | 197356976 | 197403924 | 46949  | 1   | 5  | 0 | 0.00141024 | 0          | 13 | 0 | 1.7506523  | 0 |
| chr1 | 197403924 | 197498692 | 94769  | 2   | 4  | 0 | 4.45E-04   | 0          | 13 | 0 | 2.13824703 | 0 |
| chr1 | 197498692 | 197546906 | 48215  | 3   | 5  | 1 | 2.41E-05   | 0.30102999 | 17 | 0 | 3.22720381 | 0 |
| chr1 | 197546906 | 197641307 | 94402  | 2   | 5  | 1 | 5.83E-04   | 0.30102999 | 14 | 0 | 2.06733314 | 0 |
| chr1 | 197641307 | 197686321 | 45015  | 1   | 5  | 1 | 0.00141024 | 0.30102999 | 13 | 0 | 1.7506523  | 0 |
| chr1 | 197686321 | 197686380 | 60     | 1   | 5  | 1 | 5.83E-04   | 0.30102999 | 14 | 0 | 2.06733314 | 0 |
| chr1 | 197686380 | 197743792 | 57413  | 1   | 5  | 0 | 5.83E-04   | 0          | 14 | 0 | 2.06733314 | 0 |
| chr1 | 197743792 | 197745923 | 2132   | 2   | 5  | 1 | 5.83E-04   | 0.30102999 | 14 | 0 | 2.06733314 | 0 |
| chr1 | 197745923 | 197886549 | 140627 | 1   | 5  | 0 | 5.83E-04   | 0          | 14 | 0 | 2.06733314 | 0 |
| chr1 | 197886549 | 197959837 | 73289  | 3   | 5  | 0 | 2.41E-05   | 0          | 17 | 0 | 3.22720381 | 0 |
| chr1 | 197959837 | 197959896 | 60     | 1   | 5  | 0 | 6.64E-06   | 0          | 18 | 0 | 3.69875624 | 0 |
| chr1 | 197959896 | 198172608 | 212713 | 2   | 4  | 0 | 0.00247414 | 0          | 11 | 0 | 1.52371709 | 0 |
| chr1 | 198172608 | 198222269 | 49662  | 3   | 4  | 0 | 0.00108487 | 0          | 12 | 0 | 1.81706455 | 0 |
| chr1 | 198222269 | 198319505 | 97237  | 2   | 4  | 0 | 0.00247414 | 0          | 11 | 0 | 1.52371709 | 0 |
| chr1 | 198319505 | 198365433 | 45929  | 2   | 6  | 0 | 0.00778066 | 0          | 12 | 0 | 1.17038931 | 0 |
| chr1 | 198365433 | 198465127 | 99695  | 2   | 5  | 0 | 0.00666883 | 0          | 11 | 0 | 1.20557689 | 0 |
| chr1 | 198465127 | 198498814 | 33688  | 3   | 6  | 0 | 0.00778066 | 0          | 12 | 0 | 1.17038931 | 0 |
| chr1 | 198498814 | 198577644 | 78831  | 1   | 5  | 0 | 0.00666883 | 0          | 11 | 0 | 1.20557689 | 0 |
| chr1 | 198577644 | 198652996 | 75353  | 4   | 5  | 0 | 0.00317045 | 0          | 12 | 0 | 1.46403142 | 0 |
| chr1 | 198652996 | 198653055 | 60     | 1   | 5  | 0 | 0.00141024 | 0          | 13 | 0 | 1.7506523  | 0 |
| chr1 | 198653055 | 198756025 | 102971 | 3   | 4  | 0 | 0.00247414 | 0          | 11 | 0 | 1.52371709 | 0 |
| chr1 | 198756025 | 198838996 | 82972  | 3   | 4  | 0 | 0.00108487 | 0          | 12 | 0 | 1.81706455 | 0 |
| chr1 | 198838996 | 199118773 | 279778 | 3   | 4  | 0 | 0.00247414 | 0          | 11 | 0 | 1.52371709 | 0 |
| chr1 | 199118773 | 199296665 | 110893 | 1   | 4  | 0 | 0.00530919 | 0          | 10 | 0 | 1.2568129  | 0 |
| chr1 | 199296665 | 199369446 | 139782 | 2   | 4  | 0 | 0.01077081 | 0          | 9  | 0 | 1.01542894 | 0 |
| chr1 | 199369446 | 199369505 | 60     | 1   | 4  | 0 | 0.00247414 | 0          | 11 | 0 | 1.52371709 | 0 |
| chr1 | 199369505 | 199615787 | 246283 | 2   | 4  | 0 | 0.00530919 | 0          | 10 | 0 | 1.2568129  | 0 |
| chr1 | 199615787 | 199779407 | 163621 | 2   | 4  | 0 | 0.00108487 | 0          | 12 | 0 | 1.81706455 | 0 |
| chr1 | 199779407 | 199779466 | 60     | 1   | 4  | 0 | 4.45E-04   | 0          | 13 | 0 | 2.13824703 | 0 |
| chr1 | 199779466 | 199868196 | 88731  | 4   | 4  | 0 | 0.00108487 | 0          | 12 | 0 | 1.81706455 | 0 |
| chr1 | 199868196 | 200098404 | 230209 | 5   | 4  | 0 | 4.45E-04   | 0          | 13 | 0 | 2.13824703 | 0 |
| chr1 | 200098404 | 200209628 | 111225 | 5   | 5  | 0 | 0.00141024 | 0          | 13 | 0 | 1.7506523  | 0 |
| chr1 | 200209628 | 200320987 | 60     | 1   | 6  | 0 | 0.00859896 | 0          | 13 | 0 | 1.14735594 | 0 |
| chr1 | 200320987 | 200332425 | 111739 | 2   | 5  | 0 | 0.00141024 | 0          | 13 | 0 | 1.7506523  | 0 |
| chr1 | 200332425 | 200635455 | 314031 | 8   | 7  | 0 | 0.00859896 | 0          | 13 | 0 | 1.14735594 | 0 |
| chr1 | 200635455 | 200728080 | 92626  | 2   | 7  | 0 | 0.00413023 | 0          | 14 | 0 | 1.39918918 | 0 |
| chr1 | 200728080 | 200940617 | 212538 | 7   | 7  | 0 | 0.00183109 | 0          | 15 | 0 | 1.68336308 | 0 |
| chr1 | 200940617 | 201251334 | 310718 | 10  | 8  | 0 | 0.00433294 | 0          | 15 | 0 | 1.3873209  | 0 |
| chr1 | 201251334 | 201366803 | 115470 | 3   | 7  | 0 | 0.00183109 | 0          | 15 | 0 | 1.68336308 | 0 |
| chr1 | 201366803 | 201613737 | 246935 | 8   | 8  | 0 | 0.00188722 | 0          | 16 | 0 | 1.67551277 | 0 |
| chr1 | 201613737 | 201613796 | 60     | 1   | 8  | 0 | 7.41E-04   | 0          | 17 | 0 | 2.00316618 | 0 |
| chr1 | 201613796 | 201680121 | 66326  | 2   | 8  | 0 | 0.00188722 | 0          | 16 | 0 | 1.67551277 | 0 |
| chr1 | 201680121 | 201907113 | 226993 | 9   | 9  | 0 | 0.00433294 | 0          | 16 | 0 | 1.3873209  | 0 |
| chr1 | 201907113 | 202017037 | 109925 | 2   | 7  | 0 | 7.41E-04   | 0          | 16 | 0 | 2.00316618 | 0 |
| chr1 | 202017037 | 202017096 | 60     | 1   | 8  | 0 | 0.00188722 | 0          | 16 | 0 | 1.67551277 | 0 |
| chr1 | 202017096 | 202216046 | 198951 | 7   | 7  | 0 | 7.41E-04   | 0          | 16 | 0 | 2.00316618 | 0 |
| chr1 | 202216046 | 202275394 | 59349  | 2   | 7  | 0 | 2.70E-04   | 0          | 17 | 0 | 2.36290411 | 0 |
| chr1 | 202275394 | 20234231  | 58838  | 2   | 7  | 0 | 7.41E-04   | 0          | 16 | 0 | 2.00316618 | 0 |
| chr1 | 20234231  | 202403843 | 69613  | 1   | 7  | 0 | 0.00413023 | 0          | 14 | 0 | 1.39918918 | 0 |
| chr1 | 202403843 | 20254802  | 150960 | 2   | 6  | 0 | 0.00166733 | 0          | 14 | 0 | 1.70763027 | 0 |
| chr1 | 20254802  | 202598287 | 43486  | 2   | 7  | 0 | 0.00183109 | 0          | 15 | 0 | 1.68336308 | 0 |
| chr1 | 202598287 | 202642917 | 44631  | 2   | 6  | 0 | 0.00166733 | 0          | 14 | 0 | 1.70763027 | 0 |
| chr1 | 202642917 | 202675951 | 33035  | 2   | 6  | 0 | 0.00183109 | 0          | 15 | 0 | 1.68336308 | 0 |
| chr1 | 202675951 | 202698829 | 22879  | 2   | 7  | 0 | 0.00166733 | 0          | 14 | 0 | 1.70763027 | 0 |
| chr1 | 202698829 | 202735711 | 36883  | 1   | 6  | 0 | 0.00373523 | 0          | 13 | 0 | 1.42397267 | 0 |
| chr1 | 202735711 | 202735767 | 57     | 1   | 7  | 0 | 0.00413023 | 0          | 14 | 0 | 1.39918918 | 0 |
| chr1 | 202735767 | 202821177 | 85411  | 2   | 6  | 0 | 0.00373523 | 0          | 13 | 0 | 1.42397267 | 0 |
| chr1 | 202821177 | 202821236 | 60     | 1   | 7  | 0 | 0.00413023 | 0          | 14 | 0 | 1.39918918 | 0 |
| chr1 | 202821236 | 202878048 | 56813  | 4   | 6  | 0 | 0.00166733 | 0          | 14 | 0 | 1.70763027 | 0 |
| chr1 | 202878048 | 203120599 | 242552 | 8   | 7  | 0 | 0.00413023 | 0          | 14 | 0 | 1.39918918 | 0 |
| chr1 | 203120599 | 203120658 | 60     | 1   | 8  | 0 | 0.00909834 | 0          | 14 | 0 | 1.13428373 | 0 |
| chr1 | 203120658 | 203190295 | 69638  | 4   | 7  | 0 | 0.01667721 | 0          | 12 | 0 | 0.92532268 | 0 |
| chr1 | 203190295 | 203391054 | 200760 | 8   | 8  | 0 | 0.03209037 | 0          | 12 | 0 | 0.72109894 | 0 |
| chr1 | 203391054 | 203539647 | 148594 | 2   | 11 | 0 | 0.05490675 | 0          | 11 | 0 | 0.55623409 | 0 |
| chr1 | 203539647 | 203650551 | 110905 | 4   | 8  | 0 | 0.00909834 | 0          | 14 | 0 | 1.13428373 | 0 |
| chr1 | 203650551 | 203734574 | 84024  | 5   | 8  | 0 | 0.01767679 | 0          | 13 | 0 | 0.91308053 | 0 |
| chr1 | 203734574 | 203820364 | 85791  | 4   | 7  | 0 | 0.01667721 | 0          | 12 | 0 | 0.92532268 | 0 |
| chr1 | 203820364 | 203820423 | 60     | 1</ |    |   |            |            |    |   |            |   |



|      |           |           |        |    |    |   |            |            |    |   |            |   |
|------|-----------|-----------|--------|----|----|---|------------|------------|----|---|------------|---|
| chr1 | 205902280 | 205914384 | 12105  | 2  | 6  | 0 | 0.02793176 | 0          | 10 | 0 | 0.74627054 | 0 |
| chr1 | 205914384 | 206243724 | 329341 | 1  | 5  | 0 | 0.02473314 | 0          | 9  | 0 | 0.76806864 | 0 |
| chr1 | 206243724 | 206305147 | 61424  | 2  | 6  | 0 | 0.04875589 | 0          | 9  | 0 | 0.5732208  | 0 |
| chr1 | 206305147 | 206305206 | 60     | 1  | 6  | 0 | 0.01518174 | 0          | 11 | 0 | 0.9449689  | 0 |
| chr1 | 206305206 | 206593620 | 288415 | 1  | 4  | 0 | 0.01077081 | 0          | 9  | 0 | 1.01542894 | 0 |
| chr1 | 206593620 | 206822426 | 228807 | 6  | 5  | 0 | 0.02473314 | 0          | 9  | 0 | 0.76806864 | 0 |
| chr1 | 206822426 | 207107507 | 285082 | 13 | 5  | 0 | 0.04407651 | 0          | 8  | 0 | 0.58747015 | 0 |
| chr1 | 207107507 | 207893459 | 785953 | 23 | 5  | 0 | 0.02473314 | 0          | 9  | 0 | 0.76806864 | 0 |
| chr1 | 207893459 | 207983222 | 89764  | 2  | 5  | 0 | 0.04407651 | 0          | 8  | 0 | 0.58747015 | 0 |
| chr1 | 207983222 | 207983281 | 60     | 1  | 5  | 0 | 0.02473314 | 0          | 9  | 0 | 0.76806864 | 0 |
| chr1 | 207983281 | 208196373 | 213093 | 4  | 5  | 0 | 0.04407651 | 0          | 8  | 0 | 0.58747015 | 0 |
| chr1 | 208196373 | 208236865 | 40493  | 3  | 5  | 0 | 0.02473314 | 0          | 9  | 0 | 0.76806864 | 0 |
| chr1 | 208236865 | 208339422 | 102558 | 2  | 5  | 0 | 0.04407651 | 0          | 8  | 0 | 0.58747015 | 0 |
| chr1 | 208339422 | 208427927 | 88506  | 3  | 5  | 0 | 0.02473314 | 0          | 9  | 0 | 0.76806864 | 0 |
| chr1 | 208427927 | 208821364 | 393438 | 2  | 5  | 0 | 0.04407651 | 0          | 8  | 0 | 0.58747015 | 0 |
| chr1 | 208821364 | 208821423 | 60     | 1  | 6  | 0 | 0.04875589 | 0          | 9  | 0 | 0.5732208  | 0 |
| chr1 | 208821423 | 209645905 | 824483 | 9  | 5  | 0 | 0.02473314 | 0          | 9  | 0 | 0.76806864 | 0 |
| chr1 | 209645905 | 209760272 | 114368 | 2  | 5  | 0 | 0.01320236 | 0          | 10 | 0 | 0.97390707 | 0 |
| chr1 | 209760272 | 210273811 | 513540 | 15 | 5  | 0 | 0.00666883 | 0          | 11 | 0 | 1.20557689 | 0 |
| chr1 | 210273811 | 210414985 | 141175 | 2  | 5  | 0 | 0.02473314 | 0          | 9  | 0 | 0.76806864 | 0 |
| chr1 | 210414985 | 210455054 | 50070  | 2  | 5  | 0 | 0.01320236 | 0          | 10 | 0 | 0.97390707 | 0 |
| chr1 | 210455054 | 210572164 | 107111 | 4  | 5  | 0 | 0.00666883 | 0          | 11 | 0 | 1.20557689 | 0 |
| chr1 | 210572164 | 210686471 | 114308 | 2  | 5  | 0 | 0.01320236 | 0          | 10 | 0 | 0.97390707 | 0 |
| chr1 | 210686471 | 210774632 | 88162  | 3  | 5  | 0 | 0.00317045 | 0          | 12 | 0 | 1.46403142 | 0 |
| chr1 | 210774632 | 210889791 | 115160 | 2  | 5  | 0 | 0.01320236 | 0          | 10 | 0 | 0.97390707 | 0 |
| chr1 | 210889791 | 210940349 | 50559  | 2  | 5  | 0 | 0.00666883 | 0          | 11 | 0 | 1.20557689 | 0 |
| chr1 | 210940349 | 211004039 | 63691  | 2  | 5  | 0 | 0.00317045 | 0          | 12 | 0 | 1.46403142 | 0 |
| chr1 | 211004039 | 211081199 | 77161  | 2  | 5  | 0 | 5.83E-04   | 0          | 14 | 0 | 2.06733314 | 0 |
| chr1 | 211081199 | 211109547 | 28349  | 2  | 6  | 0 | 0.00166733 | 0          | 14 | 0 | 1.70763027 | 0 |
| chr1 | 211109547 | 211226701 | 117155 | 4  | 6  | 0 | 0.00373523 | 0          | 13 | 0 | 1.42397267 | 0 |
| chr1 | 211226701 | 211276850 | 50150  | 1  | 5  | 0 | 0.00141024 | 0          | 13 | 0 | 1.7506523  | 0 |
| chr1 | 211276850 | 211433483 | 156634 | 4  | 5  | 0 | 5.83E-04   | 0          | 14 | 0 | 2.06733314 | 0 |
| chr1 | 211433483 | 211520137 | 86655  | 4  | 5  | 0 | 2.22E-04   | 0          | 15 | 0 | 2.41659593 | 0 |
| chr1 | 211520137 | 211605847 | 85711  | 2  | 5  | 0 | 5.83E-04   | 0          | 14 | 0 | 2.06733314 | 0 |
| chr1 | 211605847 | 211840221 | 234375 | 4  | 5  | 0 | 0.00141024 | 0          | 13 | 0 | 1.7506523  | 0 |
| chr1 | 211840221 | 211840476 | 256    | 3  | 5  | 0 | 5.83E-04   | 0          | 14 | 0 | 2.06733314 | 0 |
| chr1 | 211840476 | 211949537 | 109062 | 2  | 5  | 0 | 0.00317045 | 0          | 12 | 0 | 1.46403142 | 0 |
| chr1 | 211949537 | 211949596 | 60     | 1  | 5  | 0 | 5.83E-04   | 0          | 14 | 0 | 2.06733314 | 0 |
| chr1 | 211949596 | 212021610 | 72015  | 2  | 5  | 0 | 0.00141024 | 0          | 13 | 0 | 1.7506523  | 0 |
| chr1 | 212021610 | 212180023 | 158414 | 5  | 5  | 0 | 5.83E-04   | 0          | 14 | 0 | 2.06733314 | 0 |
| chr1 | 212180023 | 212180082 | 60     | 1  | 6  | 0 | 6.86E-04   | 0          | 15 | 0 | 2.02387299 | 0 |
| chr1 | 212180082 | 212277763 | 97682  | 4  | 6  | 0 | 0.00166733 | 0          | 14 | 0 | 1.70763027 | 0 |
| chr1 | 212277763 | 212466999 | 189237 | 2  | 6  | 0 | 0.00778066 | 0          | 12 | 0 | 1.17038931 | 0 |
| chr1 | 212466999 | 212502622 | 35624  | 2  | 6  | 0 | 0.00373523 | 0          | 13 | 0 | 1.42397267 | 0 |
| chr1 | 212502622 | 212629086 | 126465 | 4  | 6  | 0 | 0.01518174 | 0          | 11 | 0 | 0.9449689  | 0 |
| chr1 | 212629086 | 212792244 | 163159 | 2  | 6  | 0 | 0.02793176 | 0          | 10 | 0 | 0.74627054 | 0 |
| chr1 | 212792244 | 212800129 | 7886   | 4  | 6  | 0 | 0.00778066 | 0          | 12 | 0 | 1.17038931 | 0 |
| chr1 | 212800129 | 213136512 | 336384 | 7  | 6  | 0 | 0.01518174 | 0          | 11 | 0 | 0.9449689  | 0 |
| chr1 | 213136512 | 213186303 | 49792  | 2  | 6  | 0 | 0.02793176 | 0          | 10 | 0 | 0.74627054 | 0 |
| chr1 | 213186303 | 213186362 | 60     | 1  | 7  | 0 | 0.03037338 | 0          | 11 | 0 | 0.73110763 | 0 |
| chr1 | 213186362 | 213596479 | 410118 | 7  | 6  | 0 | 0.02793176 | 0          | 10 | 0 | 0.74627054 | 0 |
| chr1 | 213596479 | 213724183 | 127705 | 2  | 7  | 0 | 0.05232577 | 0          | 10 | 0 | 0.56314362 | 0 |
| chr1 | 213724183 | 213724242 | 60     | 1  | 8  | 0 | 0.05490675 | 0          | 11 | 0 | 0.55623409 | 0 |
| chr1 | 213724242 | 214037496 | 313255 | 3  | 8  | 0 | 0.08923391 | 0          | 10 | 0 | 0.41672387 | 0 |
| chr1 | 214037496 | 214161654 | 124159 | 3  | 8  | 0 | 0.05490675 | 0          | 11 | 0 | 0.55623409 | 0 |
| chr1 | 214161654 | 214161704 | 51     | 1  | 8  | 0 | 0.03209037 | 0          | 12 | 0 | 0.72109894 | 0 |
| chr1 | 214161704 | 214209193 | 47490  | 2  | 8  | 0 | 0.05490675 | 0          | 11 | 0 | 0.55623409 | 0 |
| chr1 | 214209193 | 215160664 | 951472 | 18 | 8  | 0 | 0.03209037 | 0          | 12 | 0 | 0.72109894 | 0 |
| chr1 | 215160664 | 215287388 | 126725 | 4  | 8  | 0 | 0.05490675 | 0          | 11 | 0 | 0.55623409 | 0 |
| chr1 | 215287388 | 215287447 | 60     | 1  | 8  | 0 | 0.03209037 | 0          | 12 | 0 | 0.72109894 | 0 |
| chr1 | 215287447 | 215546016 | 258570 | 4  | 8  | 0 | 0.05490675 | 0          | 11 | 0 | 0.55623409 | 0 |
| chr1 | 215546016 | 215795099 | 249084 | 6  | 8  | 0 | 0.01767679 | 0          | 13 | 0 | 0.91308053 | 0 |
| chr1 | 215795099 | 215982915 | 187817 | 3  | 8  | 0 | 0.05490675 | 0          | 11 | 0 | 0.55623409 | 0 |
| chr1 | 215982915 | 216144115 | 161201 | 3  | 7  | 0 | 0.03037338 | 0          | 11 | 0 | 0.73110763 | 0 |
| chr1 | 216144115 | 216191211 | 47097  | 2  | 8  | 0 | 0.05490675 | 0          | 11 | 0 | 0.55623409 | 0 |
| chr1 | 216191211 | 216332227 | 182017 | 6  | 9  | 0 | 0.09154957 | 0          | 11 | 0 | 0.41444892 | 0 |
| chr1 | 216332227 | 216595684 | 223758 | 4  | 9  | 1 | 0.09154957 | 0.30102999 | 11 | 0 | 0.41444892 | 0 |
| chr1 | 216595684 | 216677938 | 80955  | 2  | 8  | 1 | 0.05490675 | 0.30102999 | 11 | 0 | 0.55623409 | 0 |
| chr1 | 216677938 | 216896675 | 218738 | 4  | 8  | 0 | 0.05490675 | 0          | 11 | 0 | 0.55623409 | 0 |
| chr1 | 216896675 | 217229922 | 333248 | 7  | 8  | 0 | 0.03209037 | 0          | 12 | 0 | 0.72109894 | 0 |
| chr1 | 217229922 | 217229981 | 60     | 1  | 8  | 0 | 0.01767679 | 0          | 13 | 0 | 0.91308053 | 0 |
| chr1 | 217229981 | 217510116 | 280136 | 3  | 8  | 0 | 0.03209037 | 0          | 12 | 0 | 0.72109894 | 0 |
| chr1 | 217510116 | 217665042 | 154927 | 3  | 8  | 0 | 0.01767679 | 0          | 13 | 0 | 0.91308053 | 0 |
| chr1 | 217665042 | 218006521 | 341480 | 9  | 8  | 0 | 0.03209037 | 0          | 12 | 0 | 0.72109894 | 0 |
| chr1 | 218006521 | 218055815 | 49295  | 2  | 8  | 0 | 0.01767679 | 0          | 13 | 0 | 0.91308053 | 0 |
| chr1 | 218055815 | 218223567 | 167753 | 1  | 8  | 0 | 0.05490675 | 0          | 11 | 0 | 0.55623409 | 0 |
| chr1 | 218223567 | 218480900 | 257334 | 3  | 8  | 0 | 0.13872638 | 0          | 9  | 0 | 0.30102999 | 0 |
| chr1 | 218480900 | 218693490 | 212591 | 4  | 6  | 0 | 0.04875589 | 0          | 9  | 0 | 0.5732208  | 0 |
| chr1 | 218693490 | 218693549 | 60     | 1  | 7  | 0 | 0.08584816 | 0          | 9  | 0 | 0.42015402 | 0 |
| chr1 | 218693549 | 218841086 | 147538 | 1  | 8  | 0 | 0.04875589 | 0          | 9  | 0 | 0.5732208  | 0 |
| chr1 | 218841086 | 219134907 | 293822 | 2  | 4  | 0 | 0.02074938 | 0          | 8  | 0 | 0.79906872 | 0 |
| chr1 | 219134907 | 219249705 | 114799 | 2  | 5  | 0 | 0.04407651 | 0          | 8  | 0 | 0.58747015 | 0 |
| chr1 | 219249705 | 219317337 | 67633  | 2  | 6  | 0 | 0.04875589 | 0          | 9  | 0 | 0.5732208  | 0 |
| chr1 | 219317337 | 219383878 | 66542  | 3  | 7  | 0 | 0.08584816 | 0          | 9  | 0 | 0.42015402 | 0 |
| chr1 | 219383878 | 219453775 | 69898  | 2  | 8  | 0 | 0.13872638 | 0          | 9  | 0 | 0.30102999 | 0 |
| chr1 | 219453775 | 219722368 | 268594 | 2  | 7  | 0 | 0.13499366 | 0          | 8  | 0 | 0.30102999 | 0 |
| chr1 | 219722368 | 219722427 | 60     | 1  | 8  | 0 | 0.13872638 | 0          | 9  | 0 | 0.30102999 | 0 |
| chr1 | 219722427 | 219926238 | 203812 | 2  | 7  | 0 | 0.08584816 | 0          | 9  | 0 | 0.42015402 | 0 |
| chr1 | 219926238 | 219926297 | 60     | 1  | 9  | 0 | 0.09154957 | 0          | 11 | 0 | 0.41444892 | 0 |
| chr1 | 219926297 | 219963762 | 37466  | 1  | 8  | 0 | 0.05490675 | 0          | 11 | 0 | 0.55623409 | 0 |
| chr1 | 219963762 | 220071313 | 107552 | 2  | 9  | 0 | 0.09154957 | 0          | 11 | 0 | 0.41444892 | 0 |
| chr1 | 220071313 | 220321821 | 250509 | 10 | 10 | 0 | 0.09290028 | 0          | 12 | 0 | 0.41314172 | 0 |
| chr1 | 220321821 | 220386251 | 64431  | 2  | 10 | 0 | 0.14303407 | 0          | 11 | 0 | 0.30102999 | 0 |
| chr1 | 220386251 | 220437972 | 51722  | 3  | 10 | 0 | 0.09290028 | 0          | 12 | 0 | 0.41314172 | 0 |
| chr1 | 220437972 | 220677645 | 239674 | 3  | 10 | 0 | 0.14303407 | 0          | 11 | 0 | 0.30102999 | 0 |
| chr1 | 220677645 | 220720576 | 42932  | 2  | 10 | 0 | 0.09290028 | 0          | 12 | 0 | 0.41314172 | 0 |
| chr1 | 220720576 | 220948405 | 227830 | 7  | 10 | 0 | 0.14303407 | 0          | 11 | 0 | 0.30102999 | 0 |
| chr1 | 220948405 | 221044440 | 96036  | 4  | 10 | 0 | 0.0574087  | 0          | 13 | 0 | 0.5498098  | 0 |
| chr1 | 221044440 | 221329166 | 284727 | 2  | 10 | 0 | 0.14303407 | 0          | 11 | 0 | 0.30102999 | 0 |
| chr1 | 221329166 | 221654393 | 325228 | 2  | 9  | 0 | 0.09154957 | 0          | 11 | 0 | 0.41444892 | 0 |
| chr1 | 221654393 | 221817860 | 163468 | 1  | 8  |   |            |            |    |   |            |   |

|      |           |           |        |    |    |   |            |            |    |   |            |            |
|------|-----------|-----------|--------|----|----|---|------------|------------|----|---|------------|------------|
| chr1 | 224371825 | 224424250 | 52426  | 4  | 11 | 0 | 0.0574087  | 0          | 14 | 0 | 0.5498098  | 0          |
| chr1 | 224424250 | 224702757 | 278508 | 6  | 10 | 0 | 0.03344703 | 0          | 14 | 0 | 0.7135304  | 0          |
| chr1 | 224702757 | 224752562 | 49806  | 2  | 10 | 0 | 0.01817691 | 0          | 15 | 0 | 0.90719478 | 0          |
| chr1 | 224752562 | 224902680 | 150119 | 4  | 10 | 0 | 0.03344703 | 0          | 14 | 0 | 0.7135304  | 0          |
| chr1 | 224902680 | 224902739 | 60     | 1  | 11 | 0 | 0.0574087  | 0          | 14 | 0 | 0.5498098  | 0          |
| chr1 | 224902739 | 224928253 | 25515  | 1  | 10 | 0 | 0.03344703 | 0          | 14 | 0 | 0.7135304  | 0          |
| chr1 | 224928253 | 224952932 | 24680  | 1  | 10 | 0 | 0.0574087  | 0          | 13 | 0 | 0.5498098  | 0          |
| chr1 | 224952932 | 225090272 | 137341 | 2  | 11 | 0 | 0.09334429 | 0          | 13 | 0 | 0.41271556 | 0          |
| chr1 | 225090272 | 225339772 | 249501 | 5  | 11 | 0 | 0.0574087  | 0          | 14 | 0 | 0.5498098  | 0          |
| chr1 | 225339772 | 225394432 | 54661  | 1  | 10 | 0 | 0.03344703 | 0          | 14 | 0 | 0.7135304  | 0          |
| chr1 | 225394432 | 225446243 | 51812  | 2  | 10 | 0 | 0.01817691 | 0          | 15 | 0 | 0.90719478 | 0          |
| chr1 | 225446243 | 225601204 | 154962 | 4  | 11 | 0 | 0.0331093  | 0          | 15 | 0 | 0.71538971 | 0          |
| chr1 | 225601204 | 225616476 | 15273  | 2  | 11 | 0 | 0.0574087  | 0          | 14 | 0 | 0.5498098  | 0          |
| chr1 | 225616476 | 225691534 | 75059  | 2  | 11 | 0 | 0.0331093  | 0          | 15 | 0 | 0.71538971 | 0          |
| chr1 | 225691534 | 225718291 | 26758  | 2  | 12 | 0 | 0.03209037 | 0          | 16 | 0 | 0.72109894 | 0          |
| chr1 | 225718291 | 225837855 | 119565 | 2  | 12 | 0 | 0.0565833  | 0          | 15 | 0 | 0.55190077 | 0          |
| chr1 | 225837855 | 226541451 | 703597 | 15 | 11 | 0 | 0.0574087  | 0          | 14 | 0 | 0.5498098  | 0          |
| chr1 | 226541451 | 226584688 | 43238  | 4  | 12 | 0 | 0.09290028 | 0          | 14 | 0 | 0.41314172 | 0          |
| chr1 | 226584688 | 226871602 | 286915 | 5  | 11 | 0 | 0.0574087  | 0          | 14 | 0 | 0.5498098  | 0          |
| chr1 | 226871602 | 227009610 | 138009 | 3  | 12 | 0 | 0.09290028 | 0          | 14 | 0 | 0.41314172 | 0          |
| chr1 | 227009610 | 227071152 | 61543  | 3  | 13 | 0 | 0.14303407 | 0          | 14 | 0 | 0.30102999 | 0          |
| chr1 | 227071152 | 227180677 | 109526 | 2  | 13 | 0 | 0.14385241 | 0          | 13 | 0 | 0.21200206 | 0          |
| chr1 | 227180677 | 227339910 | 59234  | 2  | 13 | 0 | 0.21200206 | 0          | 13 | 0 | 0.21200206 | 0          |
| chr1 | 227339910 | 227330649 | 90740  | 2  | 13 | 0 | 0.30102999 | 0          | 12 | 0 | 0.14385241 | 0          |
| chr1 | 227330649 | 227330708 | 60     | 1  | 13 | 0 | 0.14303407 | 0          | 14 | 0 | 0.30102999 | 0          |
| chr1 | 227330708 | 227504757 | 174050 | 3  | 13 | 0 | 0.21200206 | 0          | 13 | 0 | 0.21200206 | 0          |
| chr1 | 227504757 | 227669534 | 164778 | 2  | 12 | 0 | 0.14385241 | 0          | 13 | 0 | 0.30102999 | 0          |
| chr1 | 227669534 | 227721097 | 51564  | 2  | 12 | 0 | 0.14385241 | 0          | 13 | 1 | 0.30102999 | 0.30102999 |
| chr1 | 227721097 | 227810271 | 89175  | 2  | 12 | 0 | 0.30102999 | 0          | 11 | 1 | 0.14385241 | 0.30102999 |
| chr1 | 227810271 | 227849204 | 38934  | 4  | 12 | 0 | 0.21227046 | 0          | 12 | 1 | 0.21227046 | 0.30102999 |
| chr1 | 227849204 | 227894486 | 45283  | 1  | 11 | 0 | 0.14385241 | 0          | 12 | 1 | 0.30102999 | 0.30102999 |
| chr1 | 227894486 | 227922416 | 27931  | 1  | 11 | 0 | 0.21200206 | 0          | 11 | 1 | 0.21200206 | 0.30102999 |
| chr1 | 227922416 | 227926333 | 3918   | 2  | 12 | 0 | 0.30102999 | 0          | 11 | 1 | 0.14385241 | 0.30102999 |
| chr1 | 227926333 | 227964074 | 37742  | 3  | 12 | 0 | 0.21227046 | 0          | 12 | 1 | 0.21227046 | 0.30102999 |
| chr1 | 227964074 | 228026364 | 62291  | 1  | 11 | 0 | 0.14385241 | 0          | 12 | 1 | 0.30102999 | 0.30102999 |
| chr1 | 228026364 | 228123496 | 97133  | 1  | 11 | 0 | 0.14385241 | 0          | 12 | 0 | 0.30102999 | 0          |
| chr1 | 228123496 | 228510600 | 387105 | 16 | 12 | 0 | 0.21227046 | 0          | 12 | 0 | 0.21227046 | 0          |
| chr1 | 228510600 | 228787740 | 277141 | 8  | 11 | 0 | 0.14385241 | 0          | 12 | 0 | 0.30102999 | 0          |
| chr1 | 228787740 | 228825776 | 38037  | 2  | 11 | 0 | 0.09334429 | 0          | 13 | 0 | 0.41271556 | 0          |
| chr1 | 228825776 | 228880117 | 54342  | 3  | 11 | 0 | 0.0574087  | 0          | 14 | 0 | 0.5498098  | 0          |
| chr1 | 228880117 | 228997888 | 117772 | 1  | 11 | 0 | 0.09334429 | 0          | 13 | 0 | 0.41271556 | 0          |
| chr1 | 228997888 | 229212426 | 214539 | 2  | 10 | 0 | 0.0574087  | 0          | 13 | 0 | 0.5498098  | 0          |
| chr1 | 229212426 | 229424529 | 212104 | 2  | 10 | 0 | 0.09290028 | 0          | 12 | 0 | 0.41314172 | 0          |
| chr1 | 229424529 | 229477313 | 52785  | 3  | 10 | 0 | 0.0574087  | 0          | 13 | 0 | 0.5498098  | 0          |
| chr1 | 229477313 | 229477372 | 60     | 1  | 10 | 0 | 0.03344703 | 0          | 14 | 0 | 0.7135304  | 0          |
| chr1 | 229477372 | 229600390 | 123019 | 4  | 10 | 0 | 0.0574087  | 0          | 13 | 0 | 0.5498098  | 0          |
| chr1 | 229600390 | 229619882 | 19493  | 2  | 10 | 0 | 0.03344703 | 0          | 14 | 0 | 0.7135304  | 0          |
| chr1 | 229619882 | 229795290 | 175409 | 6  | 10 | 0 | 0.0574087  | 0          | 13 | 0 | 0.5498098  | 0          |
| chr1 | 229795290 | 230141642 | 346353 | 4  | 10 | 0 | 0.03344703 | 0          | 14 | 0 | 0.7135304  | 0          |
| chr1 | 230141642 | 230332201 | 190560 | 6  | 11 | 0 | 0.0574087  | 0          | 14 | 0 | 0.5498098  | 0          |
| chr1 | 230332201 | 230332260 | 60     | 1  | 12 | 0 | 0.09290028 | 0          | 14 | 0 | 0.41314172 | 0          |
| chr1 | 230332260 | 230405964 | 73705  | 2  | 11 | 0 | 0.0574087  | 0          | 14 | 0 | 0.5498098  | 0          |
| chr1 | 230405964 | 230450225 | 44262  | 2  | 12 | 0 | 0.09290028 | 0          | 14 | 0 | 0.41314172 | 0          |
| chr1 | 230450225 | 230450284 | 60     | 1  | 13 | 0 | 0.14303407 | 0          | 14 | 0 | 0.30102999 | 0          |
| chr1 | 230450284 | 230477751 | 27468  | 1  | 12 | 0 | 0.09290028 | 0          | 14 | 0 | 0.41314172 | 0          |
| chr1 | 230477751 | 230557199 | 79449  | 3  | 13 | 0 | 0.14303407 | 0          | 14 | 0 | 0.30102999 | 0          |
| chr1 | 230557199 | 230824675 | 267477 | 4  | 12 | 0 | 0.09290028 | 0          | 14 | 0 | 0.41314172 | 0          |
| chr1 | 230824675 | 231042452 | 217778 | 6  | 11 | 0 | 0.0574087  | 0          | 14 | 0 | 0.5498098  | 0          |
| chr1 | 231042452 | 231119461 | 77010  | 3  | 11 | 1 | 0.0574087  | 0.30102999 | 14 | 0 | 0.5498098  | 0          |
| chr1 | 231119461 | 231320451 | 200991 | 7  | 12 | 1 | 0.09290028 | 0.30102999 | 14 | 0 | 0.41314172 | 0          |
| chr1 | 231320451 | 231376250 | 55800  | 2  | 12 | 0 | 0.09290028 | 0          | 14 | 0 | 0.41314172 | 0          |
| chr1 | 231376250 | 231449141 | 72892  | 3  | 13 | 0 | 0.14303407 | 0          | 14 | 0 | 0.30102999 | 0          |
| chr1 | 231449141 | 231469697 | 20557  | 2  | 13 | 1 | 0.14303407 | 0.30102999 | 14 | 0 | 0.30102999 | 0          |
| chr1 | 231469697 | 231474669 | 4973   | 1  | 13 | 1 | 0.21200206 | 0.30102999 | 13 | 0 | 0.21200206 | 0          |
| chr1 | 231474669 | 231523497 | 48829  | 1  | 13 | 0 | 0.21200206 | 0          | 13 | 0 | 0.21200206 | 0          |
| chr1 | 231523497 | 231523556 | 60     | 1  | 13 | 0 | 0.14303407 | 0          | 14 | 0 | 0.30102999 | 0          |
| chr1 | 231523556 | 231559907 | 36352  | 1  | 12 | 0 | 0.09290028 | 0          | 14 | 0 | 0.41314172 | 0          |
| chr1 | 231559907 | 231559966 | 60     | 1  | 12 | 0 | 0.0565833  | 0          | 15 | 0 | 0.55190077 | 0          |
| chr1 | 231559966 | 231685406 | 125441 | 2  | 12 | 0 | 0.09290028 | 0          | 14 | 0 | 0.41314172 | 0          |
| chr1 | 231685406 | 231737926 | 52521  | 2  | 13 | 0 | 0.09154957 | 0          | 15 | 0 | 0.41444892 | 0          |
| chr1 | 231737926 | 231737985 | 60     | 1  | 13 | 1 | 0.09154957 | 0.30102999 | 15 | 0 | 0.41444892 | 0          |
| chr1 | 231737985 | 231788366 | 50382  | 1  | 13 | 1 | 0.14303407 | 0.30102999 | 14 | 0 | 0.30102999 | 0          |
| chr1 | 231788366 | 231859742 | 71377  | 2  | 12 | 1 | 0.09290028 | 0.30102999 | 14 | 0 | 0.41314172 | 0          |
| chr1 | 231859742 | 231935770 | 76029  | 1  | 10 | 1 | 0.03344703 | 0.30102999 | 14 | 0 | 0.7135304  | 0          |
| chr1 | 231935770 | 232002490 | 66721  | 1  | 9  | 1 | 0.0331093  | 0.30102999 | 13 | 0 | 0.71538971 | 0          |
| chr1 | 232002490 | 232072932 | 70443  | 3  | 10 | 1 | 0.0574087  | 0.30102999 | 13 | 0 | 0.5498098  | 0          |
| chr1 | 232072932 | 232191881 | 118950 | 3  | 10 | 1 | 0.03344703 | 0.30102999 | 14 | 0 | 0.7135304  | 0          |
| chr1 | 232191881 | 232308868 | 116988 | 1  | 10 | 0 | 0.03344703 | 0          | 14 | 0 | 0.7135304  | 0          |
| chr1 | 232308868 | 232383904 | 75037  | 1  | 10 | 0 | 0.0574087  | 0          | 13 | 0 | 0.5498098  | 0          |
| chr1 | 232383904 | 23240308  | 156405 | 2  | 10 | 1 | 0.0574087  | 0.30102999 | 13 | 0 | 0.5498098  | 0          |
| chr1 | 23240308  | 232605805 | 65498  | 2  | 10 | 1 | 0.03344703 | 0.30102999 | 14 | 0 | 0.7135304  | 0          |
| chr1 | 232605805 | 232643611 | 37807  | 1  | 10 | 1 | 0.0574087  | 0.30102999 | 13 | 0 | 0.5498098  | 0          |
| chr1 | 232643611 | 232825288 | 181678 | 3  | 9  | 0 | 0.0331093  | 0.30102999 | 13 | 0 | 0.71538971 | 0          |
| chr1 | 232825288 | 232825347 | 60     | 1  | 9  | 1 | 0.0331093  | 0.1218695  | 13 | 1 | 0.71538971 | 0.1218695  |
| chr1 | 232825347 | 232942284 | 116938 | 1  | 9  | 1 | 0.0331093  | 0.30102999 | 13 | 0 | 0.71538971 | 0          |
| chr1 | 232942284 | 232942343 | 60     | 1  | 10 | 1 | 0.03344703 | 0.30102999 | 14 | 0 | 0.7135304  | 0          |
| chr1 | 232942343 | 232981590 | 39248  | 2  | 10 | 1 | 0.0574087  | 0.30102999 | 13 | 0 | 0.5498098  | 0          |
| chr1 | 232981590 | 233091303 | 109714 | 2  | 10 | 1 | 0.09290028 | 0.30102999 | 12 | 0 | 0.41314172 | 0          |
| chr1 | 233091303 | 233152905 | 61603  | 3  | 10 | 1 | 0.03344703 | 0.30102999 | 14 | 0 | 0.7135304  | 0          |
| chr1 | 233152905 | 233193009 | 40105  | 1  | 10 | 1 | 0.0574087  | 0.30102999 | 13 | 0 | 0.5498098  | 0          |
| chr1 | 233193009 | 233284641 | 91633  | 2  | 10 | 0 | 0.0574087  | 0          | 13 | 0 | 0.5498098  | 0          |
| chr1 | 233284641 | 233284700 | 60     | 1  | 11 | 0 | 0.09334429 | 0          | 13 | 0 | 0.41271556 | 0          |
| chr1 | 233284700 | 233422815 | 138116 | 4  | 10 | 0 | 0.0574087  | 0          | 13 | 0 | 0.5498098  | 0          |
| chr1 | 233422815 | 233511622 | 88808  | 5  | 10 | 1 | 0.03344703 | 0.30102999 | 14 | 0 | 0.7135304  | 0          |
| chr1 | 233511622 | 233649171 | 137550 | 3  | 11 | 1 | 0.0574087  | 0.30102999 | 14 | 0 | 0.5498098  | 0          |
| chr1 | 233649171 | 233768132 | 118962 | 1  | 11 | 0 | 0.0574087  | 0          | 14 | 0 | 0.5498098  | 0          |
| chr1 | 233768132 | 233998258 | 230127 | 6  | 12 | 0 | 0.09290028 | 0          | 14 | 0 | 0.41314172 | 0          |
| chr1 | 233998258 | 234070031 | 71774  | 2  | 12 | 0 | 0.0565833  | 0          | 15 | 0 |            |            |

|      |           |           |        |    |    |   |            |            |    |   |            |            |
|------|-----------|-----------|--------|----|----|---|------------|------------|----|---|------------|------------|
| chr1 | 236180573 | 236286038 | 105466 | 3  | 12 | 1 | 0.14385241 | 0.30102999 | 13 | 0 | 0.30102999 | 0          |
| chr1 | 236286038 | 236332057 | 46020  | 1  | 12 | 1 | 0.21227046 | 0.30102999 | 12 | 0 | 0.21227046 | 0          |
| chr1 | 236332057 | 236389691 | 57635  | 2  | 12 | 1 | 0.30102999 | 0.30102999 | 11 | 0 | 0.14385241 | 0          |
| chr1 | 236389691 | 236442263 | 52573  | 2  | 12 | 1 | 0.21227046 | 0.30102999 | 12 | 0 | 0.21227046 | 0          |
| chr1 | 236442263 | 236442322 | 60     | 1  | 13 | 1 | 0.30102999 | 0.30102999 | 12 | 0 | 0.14385241 | 0          |
| chr1 | 236442322 | 236554819 | 112498 | 1  | 13 | 1 | 0.41271556 | 0.30102999 | 11 | 0 | 0.09334429 | 0          |
| chr1 | 236554819 | 236572538 | 17720  | 2  | 14 | 1 | 0.41314172 | 0.30102999 | 12 | 0 | 0.09290028 | 0          |
| chr1 | 236572538 | 236631570 | 59033  | 3  | 14 | 1 | 0.30102999 | 0.30102999 | 13 | 0 | 0.14303407 | 0          |
| chr1 | 236631570 | 236748164 | 116595 | 5  | 14 | 0 | 0.30102999 | 0          | 13 | 0 | 0.14303407 | 0          |
| chr1 | 236748164 | 236852256 | 104093 | 1  | 12 | 0 | 0.21227046 | 0          | 12 | 0 | 0.21227046 | 0          |
| chr1 | 236852256 | 236889896 | 37641  | 2  | 12 | 1 | 0.21227046 | 0.30102999 | 12 | 0 | 0.21227046 | 0          |
| chr1 | 236889896 | 236961331 | 71436  | 3  | 13 | 1 | 0.21200206 | 0.30102999 | 13 | 0 | 0.21200206 | 0          |
| chr1 | 236961331 | 236999014 | 37684  | 3  | 13 | 1 | 0.14303407 | 0.30102999 | 14 | 0 | 0.30102999 | 0          |
| chr1 | 236999014 | 237060949 | 61936  | 2  | 12 | 0 | 0.14385241 | 0          | 13 | 0 | 0.30102999 | 0          |
| chr1 | 237060949 | 237127282 | 66334  | 2  | 12 | 0 | 0.09290028 | 0          | 14 | 0 | 0.41314172 | 0          |
| chr1 | 237127282 | 237127341 | 60     | 1  | 14 | 0 | 0.21118145 | 0          | 14 | 0 | 0.21118145 | 0          |
| chr1 | 237127341 | 237205104 | 77764  | 1  | 13 | 0 | 0.21200206 | 0          | 13 | 0 | 0.21200206 | 0          |
| chr1 | 237205104 | 237604669 | 399566 | 8  | 12 | 0 | 0.14385241 | 0          | 13 | 0 | 0.30102999 | 0          |
| chr1 | 237604669 | 237728098 | 123430 | 60 | 13 | 0 | 0.21200206 | 0          | 13 | 0 | 0.21200206 | 0          |
| chr1 | 237728098 | 237728157 | 60     | 1  | 13 | 0 | 0.14303407 | 0          | 14 | 0 | 0.30102999 | 0          |
| chr1 | 237728157 | 237817664 | 89508  | 2  | 13 | 0 | 0.30102999 | 0          | 12 | 0 | 0.14385241 | 0          |
| chr1 | 237817664 | 23832806  | 545143 | 9  | 13 | 0 | 0.14303407 | 0          | 14 | 0 | 0.30102999 | 0          |
| chr1 | 23832806  | 238550957 | 288152 | 3  | 11 | 0 | 0.0574087  | 0          | 14 | 0 | 0.5498098  | 0          |
| chr1 | 238550957 | 238888870 | 237914 | 2  | 11 | 0 | 0.14385241 | 0          | 12 | 0 | 0.30102999 | 0          |
| chr1 | 238888870 | 239011061 | 122192 | 2  | 11 | 0 | 0.0574087  | 0          | 14 | 0 | 0.5498098  | 0          |
| chr1 | 239011061 | 239459749 | 448689 | 3  | 11 | 0 | 0.14385241 | 0          | 12 | 0 | 0.30102999 | 0          |
| chr1 | 239459749 | 239721730 | 261982 | 3  | 12 | 0 | 0.09290028 | 0          | 14 | 0 | 0.41314172 | 0          |
| chr1 | 239721730 | 239927943 | 206214 | 5  | 12 | 1 | 0.09290028 | 0.30102999 | 14 | 0 | 0.41314172 | 0          |
| chr1 | 239927943 | 239928002 | 60     | 1  | 14 | 1 | 0.21118145 | 0.30102999 | 14 | 0 | 0.21118145 | 0          |
| chr1 | 239928002 | 240193465 | 265464 | 6  | 13 | 1 | 0.14303407 | 0.30102999 | 14 | 0 | 0.30102999 | 0          |
| chr1 | 240193465 | 240313763 | 120299 | 3  | 14 | 1 | 0.21118145 | 0.30102999 | 14 | 0 | 0.21118145 | 0          |
| chr1 | 240313763 | 240681465 | 367703 | 9  | 13 | 0 | 0.14303407 | 0.30102999 | 14 | 0 | 0.30102999 | 0          |
| chr1 | 240681465 | 240773332 | 91868  | 4  | 13 | 1 | 0.09154957 | 0.30102999 | 15 | 0 | 0.41444892 | 0          |
| chr1 | 240773332 | 240773391 | 60     | 1  | 14 | 1 | 0.14135546 | 0.30102999 | 15 | 0 | 0.30102999 | 0          |
| chr1 | 240773391 | 241031936 | 258546 | 5  | 13 | 1 | 0.09154957 | 0.30102999 | 15 | 0 | 0.41444892 | 0          |
| chr1 | 241031936 | 241031995 | 60     | 1  | 14 | 1 | 0.14135546 | 0.30102999 | 15 | 0 | 0.30102999 | 0          |
| chr1 | 241031995 | 241178061 | 146067 | 2  | 14 | 1 | 0.21118145 | 0.30102999 | 14 | 0 | 0.21118145 | 0          |
| chr1 | 241178061 | 241225681 | 47621  | 2  | 14 | 1 | 0.14135546 | 0.30102999 | 15 | 0 | 0.30102999 | 0          |
| chr1 | 241225681 | 241337270 | 111590 | 3  | 14 | 1 | 0.08923391 | 0.30102999 | 16 | 0 | 0.4167287  | 0          |
| chr1 | 241337270 | 241337329 | 60     | 1  | 14 | 1 | 0.05232577 | 0.30102999 | 17 | 0 | 0.56314362 | 0          |
| chr1 | 241337329 | 241380807 | 43479  | 1  | 14 | 1 | 0.14135546 | 0.30102999 | 15 | 0 | 0.30102999 | 0          |
| chr1 | 241380807 | 241380866 | 60     | 1  | 15 | 1 | 0.20975986 | 0.30102999 | 15 | 0 | 0.20975986 | 0          |
| chr1 | 241380866 | 24139921  | 59056  | 1  | 15 | 0 | 0.20975986 | 0          | 15 | 0 | 0.20975986 | 0          |
| chr1 | 24139921  | 24139980  | 60     | 1  | 15 | 0 | 0.08584816 | 0          | 17 | 0 | 0.42015402 | 0          |
| chr1 | 24139980  | 241522090 | 82111  | 2  | 15 | 0 | 0.13872638 | 0          | 16 | 0 | 0.30102999 | 0          |
| chr1 | 241522090 | 241680610 | 158521 | 2  | 14 | 0 | 0.08923391 | 0          | 16 | 0 | 0.4167287  | 0          |
| chr1 | 241680610 | 241704844 | 24235  | 1  | 14 | 0 | 0.14135546 | 0          | 15 | 0 | 0.30102999 | 0          |
| chr1 | 241704844 | 241757184 | 52341  | 2  | 13 | 0 | 0.09154957 | 0          | 15 | 0 | 0.41444892 | 0          |
| chr1 | 241757184 | 241799086 | 41903  | 2  | 14 | 0 | 0.14135546 | 0          | 15 | 0 | 0.30102999 | 0          |
| chr1 | 241799086 | 241799145 | 60     | 1  | 15 | 0 | 0.20975986 | 0          | 15 | 0 | 0.20975986 | 0          |
| chr1 | 241799145 | 241857097 | 57953  | 1  | 13 | 0 | 0.09154957 | 0          | 15 | 0 | 0.41444892 | 0          |
| chr1 | 241857097 | 241913757 | 56661  | 1  | 12 | 0 | 0.0565833  | 0          | 15 | 0 | 0.55190077 | 0          |
| chr1 | 241913757 | 241951077 | 37321  | 3  | 13 | 0 | 0.09154957 | 0          | 15 | 0 | 0.41444892 | 0          |
| chr1 | 241951077 | 242023977 | 72901  | 4  | 14 | 0 | 0.14135546 | 0.30102999 | 15 | 0 | 0.30102999 | 0          |
| chr1 | 242023977 | 242151589 | 127613 | 3  | 13 | 0 | 0.09154957 | 0          | 15 | 0 | 0.41444892 | 0          |
| chr1 | 242151589 | 242223280 | 71692  | 2  | 14 | 0 | 0.14135546 | 0          | 15 | 0 | 0.30102999 | 0          |
| chr1 | 242223280 | 242287764 | 64485  | 2  | 12 | 0 | 0.0565833  | 0          | 15 | 0 | 0.55190077 | 0          |
| chr1 | 242287764 | 242287823 | 60     | 1  | 13 | 0 | 0.09154957 | 0          | 15 | 0 | 0.41444892 | 0          |
| chr1 | 242287823 | 242357208 | 69386  | 1  | 11 | 0 | 0.0331093  | 0          | 15 | 0 | 0.71538971 | 0          |
| chr1 | 242357208 | 242404099 | 46892  | 2  | 12 | 0 | 0.0565833  | 0          | 15 | 0 | 0.55190077 | 0          |
| chr1 | 242404099 | 242404158 | 60     | 1  | 12 | 0 | 0.03209037 | 0          | 16 | 0 | 0.72109894 | 0          |
| chr1 | 242404158 | 242442098 | 37941  | 1  | 12 | 0 | 0.0565833  | 0          | 15 | 0 | 0.55190077 | 0          |
| chr1 | 242442098 | 242442157 | 60     | 1  | 13 | 0 | 0.09154957 | 0          | 15 | 0 | 0.41444892 | 0          |
| chr1 | 242442157 | 242512907 | 70751  | 1  | 12 | 0 | 0.0565833  | 0          | 15 | 0 | 0.55190077 | 0          |
| chr1 | 242512907 | 242573871 | 60965  | 2  | 12 | 0 | 0.03209037 | 0          | 16 | 0 | 0.72109894 | 0          |
| chr1 | 242573871 | 242607168 | 33298  | 2  | 13 | 0 | 0.05490675 | 0          | 16 | 0 | 0.55623409 | 0          |
| chr1 | 242607168 | 242656519 | 49352  | 2  | 14 | 0 | 0.08923391 | 0          | 14 | 0 | 0.4167287  | 0          |
| chr1 | 242656519 | 242772314 | 115796 | 1  | 13 | 0 | 0.05490675 | 0          | 16 | 0 | 0.55623409 | 0          |
| chr1 | 242772314 | 242987737 | 215424 | 2  | 13 | 0 | 0.09154957 | 0          | 15 | 0 | 0.41444892 | 0          |
| chr1 | 242987737 | 242987796 | 60     | 1  | 13 | 0 | 0.05490675 | 0          | 16 | 0 | 0.55623409 | 0          |
| chr1 | 242987796 | 243309051 | 321256 | 1  | 13 | 0 | 0.09154957 | 0          | 15 | 0 | 0.41444892 | 0          |
| chr1 | 243309051 | 243348977 | 39927  | 2  | 14 | 0 | 0.14135546 | 0          | 15 | 0 | 0.30102999 | 0          |
| chr1 | 243348977 | 243456375 | 107399 | 2  | 11 | 0 | 0.0331093  | 0          | 15 | 0 | 0.71538971 | 0          |
| chr1 | 243456375 | 243456434 | 60     | 1  | 14 | 0 | 0.14135546 | 0          | 15 | 0 | 0.30102999 | 0          |
| chr1 | 243456434 | 243542020 | 85587  | 2  | 13 | 0 | 0.14303407 | 0          | 14 | 0 | 0.30102999 | 0          |
| chr1 | 243542020 | 243542079 | 60     | 1  | 14 | 0 | 0.21118145 | 0          | 14 | 0 | 0.21118145 | 0          |
| chr1 | 243542079 | 243736246 | 194168 | 5  | 13 | 0 | 0.14303407 | 0          | 14 | 0 | 0.30102999 | 0          |
| chr1 | 243736246 | 243736301 | 56     | 1  | 13 | 0 | 0.09154957 | 0          | 15 | 0 | 0.41444892 | 0          |
| chr1 | 243736301 | 243809193 | 72893  | 1  | 12 | 0 | 0.09290028 | 0          | 14 | 0 | 0.41314172 | 0          |
| chr1 | 243809193 | 243809252 | 60     | 1  | 12 | 0 | 0.09154957 | 0          | 15 | 0 | 0.41444892 | 0          |
| chr1 | 243809252 | 243880099 | 70848  | 1  | 13 | 0 | 0.0565833  | 0          | 15 | 0 | 0.55190077 | 0          |
| chr1 | 243880099 | 243880158 | 60     | 1  | 12 | 0 | 0.03209037 | 0          | 16 | 0 | 0.72109894 | 0          |
| chr1 | 243880158 | 243949931 | 69774  | 2  | 12 | 0 | 0.09290028 | 0          | 14 | 0 | 0.41314172 | 0          |
| chr1 | 243949931 | 244033798 | 83868  | 3  | 13 | 0 | 0.14303407 | 0          | 14 | 0 | 0.30102999 | 0          |
| chr1 | 244033798 | 244305407 | 271610 | 5  | 14 | 0 | 0.14135546 | 0          | 15 | 0 | 0.30102999 | 0          |
| chr1 | 244305407 | 244572034 | 266628 | 5  | 14 | 0 | 0.08923391 | 0          | 16 | 0 | 0.4167287  | 0          |
| chr1 | 244572034 | 245019894 | 447861 | 10 | 14 | 0 | 0.14135546 | 0          | 15 | 0 | 0.30102999 | 0          |
| chr1 | 245019894 | 245617025 | 597132 | 16 | 15 | 0 | 0.20975986 | 0          | 15 | 0 | 0.20975986 | 0          |
| chr1 | 245617025 | 246116583 | 499559 | 11 | 15 | 0 | 0.13872638 | 0          | 16 | 0 | 0.30102999 | 0          |
| chr1 | 246116583 | 246201500 | 84918  | 2  | 14 | 0 | 0.08923391 | 0          | 16 | 0 | 0.4167287  | 0          |
| chr1 | 246201500 | 246550260 | 348761 | 7  | 14 | 0 | 0.14135546 | 0          | 15 | 0 | 0.30102999 | 0          |
| chr1 | 246550260 | 246704463 | 154204 | 2  | 12 | 0 | 0.0565833  | 0          | 15 | 0 | 0.55190077 | 0          |
| chr1 | 246704463 | 246731512 | 27050  | 2  | 13 | 0 | 0.09154957 | 0          | 15 | 0 | 0.41444892 | 0          |
| chr1 | 246731512 | 246731571 | 60     | 1  | 14 | 0 | 0.14135546 | 0          | 15 | 0 | 0.30102999 | 0          |
| chr1 | 246731571 | 246831012 | 99442  | 3  | 13 | 0 | 0.09154957 | 0          | 15 | 0 | 0.41444892 | 0          |
| chr1 | 246831012 | 246890227 | 59216  | 3  | 14 | 0 | 0.14135546 | 0          | 15 | 1 | 0.30102999 | 0.30102999 |
| chr1 | 246890227 | 246931110 | 40884  | 1  | 13 | 0 | 0.09154957 | 0          | 15 | 1 | 0.41444892 | 0.30102999 |
| chr1 | 246931110 | 247009584 | 78475  | 2  | 12 | 0 | 0.0565833  | 0          | 15 | 1 | 0.5        |            |

|      |           |           |        |    |    |   |            |            |    |   |            |            |
|------|-----------|-----------|--------|----|----|---|------------|------------|----|---|------------|------------|
| chr1 | 248438465 | 248684850 | 246386 | 5  | 11 | 0 | 0.0331093  | 0          | 15 | 1 | 0.71538971 | 0.30102999 |
| chr1 | 248684850 | 248684909 | 60     | 1  | 11 | 1 | 0.0331093  | 0.1218695  | 15 | 1 | 0.71538971 | 0.1218695  |
| chr1 | 248684909 | 248745802 | 60894  | 1  | 11 | 1 | 0.0331093  | 0.30102999 | 15 | 0 | 0.71538971 | 0          |
| chr1 | 248745802 | 248786842 | 41041  | 2  | 12 | 1 | 0.0565833  | 0.30102999 | 15 | 0 | 0.55190077 | 0          |
| chr1 | 248786842 | 248904492 | 117651 | 2  | 11 | 1 | 0.0574087  | 0.30102999 | 14 | 0 | 0.5498098  | 0          |
| chr1 | 248904492 | 249212668 | 308177 | 6  | 11 | 1 | 0.30102999 | 0.30102999 | 10 | 0 | 0.14303407 | 0          |
| chr2 | 42444     | 84669     | 42226  | 2  | 2  | 2 | 0.1575501  | 0.61140001 | 2  | 0 | 0.1575501  | 0          |
| chr2 | 84669     | 84728     | 60     | 1  | 2  | 2 | 0.00493743 | 0.1575501  | 7  | 2 | 1.16581773 | 0.1575501  |
| chr2 | 84728     | 272602    | 187875 | 2  | 2  | 2 | 0.01053319 | 0.61140001 | 6  | 0 | 0.91219088 | 0          |
| chr2 | 272602    | 272661    | 60     | 1  | 2  | 2 | 0.01053319 | 0.1575501  | 6  | 2 | 0.91219088 | 0.1575501  |
| chr2 | 272661    | 386460    | 113800 | 2  | 2  | 2 | 0.02162467 | 0.61140001 | 5  | 0 | 0.68214471 | 0          |
| chr2 | 386460    | 386519    | 60     | 1  | 3  | 2 | 0.01598258 | 0.61140001 | 7  | 0 | 0.84395715 | 0          |
| chr2 | 386519    | 456961    | 70443  | 1  | 3  | 2 | 0.03070643 | 0.61140001 | 6  | 0 | 0.63695542 | 0          |
| chr2 | 456961    | 457020    | 60     | 1  | 3  | 2 | 0.03070643 | 0.30102999 | 6  | 1 | 0.63695542 | 0.05404976 |
| chr2 | 457020    | 506983    | 49964  | 1  | 3  | 2 | 0.03070643 | 0.61140001 | 6  | 0 | 0.63695542 | 0          |
| chr2 | 506983    | 642724    | 135742 | 3  | 3  | 2 | 0.01598258 | 0.1575501  | 7  | 2 | 0.84395715 | 0.1575501  |
| chr2 | 642724    | 768496    | 125773 | 3  | 3  | 2 | 0.01598258 | 0.0828918  | 7  | 3 | 0.84395715 | 0.30102999 |
| chr2 | 768496    | 883836    | 115341 | 3  | 3  | 3 | 0.01598258 | 0.17593012 | 7  | 3 | 0.84395715 | 0.17593012 |
| chr2 | 883836    | 978269    | 94434  | 3  | 4  | 3 | 0.03812622 | 0.17593012 | 7  | 3 | 0.60763643 | 0.17593012 |
| chr2 | 978269    | 1151213   | 172945 | 5  | 4  | 3 | 0.03812622 | 0.10122019 | 7  | 4 | 0.60763643 | 0.30102999 |
| chr2 | 1151213   | 1286105   | 134839 | 3  | 3  | 3 | 0.01598258 | 0.10122019 | 7  | 4 | 0.84395715 | 0.30102999 |
| chr2 | 1286105   | 1286110   | 60     | 1  | 3  | 3 | 0.0079614  | 0.10122019 | 8  | 4 | 1.07548421 | 0.30102999 |
| chr2 | 1286110   | 1318927   | 32818  | 1  | 3  | 3 | 0.01598258 | 0.10122019 | 7  | 4 | 0.84395715 | 0.30102999 |
| chr2 | 1318927   | 1467170   | 148244 | 4  | 4  | 3 | 0.03812622 | 0.10122019 | 7  | 4 | 0.60763643 | 0.30102999 |
| chr2 | 1467170   | 1587525   | 120356 | 2  | 4  | 3 | 0.06713722 | 0.10122019 | 6  | 4 | 0.44141547 | 0.30102999 |
| chr2 | 1587525   | 1635643   | 48119  | 1  | 3  | 3 | 0.03070643 | 0.10122019 | 6  | 4 | 0.63695542 | 0.30102999 |
| chr2 | 1635643   | 1635702   | 60     | 1  | 3  | 3 | 0.01598258 | 0.10122019 | 7  | 4 | 0.84395715 | 0.30102999 |
| chr2 | 1635702   | 1842130   | 206429 | 4  | 3  | 3 | 0.03070643 | 0.10122019 | 6  | 4 | 0.63695542 | 0.30102999 |
| chr2 | 1842130   | 1973115   | 130986 | 2  | 3  | 3 | 0.03070643 | 0.17593012 | 6  | 3 | 0.63695542 | 0.17593012 |
| chr2 | 1973115   | 2063821   | 90707  | 3  | 3  | 3 | 0.01598258 | 0.17593012 | 7  | 3 | 0.84395715 | 0.17593012 |
| chr2 | 2063821   | 2063880   | 60     | 1  | 3  | 3 | 0.01598258 | 0.10122019 | 7  | 4 | 0.84395715 | 0.30102999 |
| chr2 | 2063880   | 2144860   | 80981  | 1  | 3  | 3 | 0.03070643 | 0.10122019 | 6  | 4 | 0.63695542 | 0.30102999 |
| chr2 | 2144860   | 2198678   | 53819  | 1  | 3  | 3 | 0.05670724 | 0.10122019 | 5  | 4 | 0.45545077 | 0.30102999 |
| chr2 | 2198678   | 2198737   | 60     | 1  | 4  | 3 | 0.11390326 | 0.10122019 | 5  | 4 | 0.30102999 | 0.30102999 |
| chr2 | 2198737   | 2550621   | 351885 | 5  | 3  | 3 | 0.05670724 | 0.10122019 | 5  | 4 | 0.45545077 | 0.30102999 |
| chr2 | 2550621   | 2606073   | 55453  | 1  | 3  | 3 | 0.10122019 | 0.17593012 | 4  | 3 | 0.30102999 | 0.17593012 |
| chr2 | 2606073   | 2688584   | 82512  | 1  | 3  | 3 | 0.17593012 | 0.17593012 | 3  | 3 | 0.17593012 | 0.17593012 |
| chr2 | 2688584   | 2859209   | 170626 | 3  | 3  | 3 | 0.10122019 | 0.17593012 | 4  | 3 | 0.30102999 | 0.17593012 |
| chr2 | 2859209   | 3501952   | 642744 | 9  | 3  | 2 | 0.10122019 | 0.0828918  | 4  | 3 | 0.30102999 | 0.30102999 |
| chr2 | 3501952   | 3584739   | 82788  | 2  | 4  | 2 | 0.18734596 | 0.0828918  | 4  | 3 | 0.18734596 | 0.30102999 |
| chr2 | 3584739   | 3627380   | 42642  | 2  | 5  | 2 | 0.30102999 | 0.0828918  | 4  | 3 | 0.11390326 | 0.30102999 |
| chr2 | 3627380   | 3680384   | 53005  | 2  | 5  | 2 | 0.12309572 | 0.0828918  | 6  | 3 | 0.30102999 | 0.30102999 |
| chr2 | 3680384   | 3729182   | 48799  | 1  | 5  | 2 | 0.19510895 | 0.0828918  | 5  | 3 | 0.19510895 | 0.30102999 |
| chr2 | 3729182   | 3729241   | 60     | 1  | 5  | 2 | 0.12309572 | 0.0828918  | 6  | 3 | 0.30102999 | 0.30102999 |
| chr2 | 3729241   | 3792291   | 63051  | 1  | 5  | 2 | 0.12309572 | 0.1575501  | 6  | 2 | 0.30102999 | 0.1575501  |
| chr2 | 3792291   | 3897248   | 104958 | 3  | 5  | 2 | 0.07511598 | 0.1575501  | 7  | 2 | 0.43181735 | 0.1575501  |
| chr2 | 3897248   | 4120428   | 223181 | 3  | 4  | 2 | 0.03812622 | 0.1575501  | 7  | 2 | 0.60763643 | 0.1575501  |
| chr2 | 4120428   | 4283717   | 163290 | 3  | 4  | 2 | 0.01598258 | 0.1575501  | 7  | 2 | 0.84395715 | 0.1575501  |
| chr2 | 4283717   | 4514232   | 230516 | 3  | 2  | 2 | 0.00493743 | 0.1575501  | 7  | 2 | 1.16581773 | 0.1575501  |
| chr2 | 4514232   | 4647940   | 133709 | 2  | 2  | 1 | 0.02162467 | 0.1218695  | 5  | 1 | 0.68214471 | 0.1218695  |
| chr2 | 4647940   | 4745093   | 97154  | 2  | 2  | 2 | 0.02162467 | 0.30102999 | 5  | 1 | 0.68214471 | 0.05404976 |
| chr2 | 4745093   | 4745152   | 60     | 1  | 2  | 2 | 0.01053319 | 0.30102999 | 6  | 1 | 0.91219088 | 0.05404976 |
| chr2 | 4745152   | 4981582   | 236431 | 3  | 1  | 1 | 0.00478973 | 0.1218695  | 5  | 1 | 1.02643191 | 0.1218695  |
| chr2 | 4981582   | 5309018   | 327437 | 1  | 1  | 1 | 0.01091641 | 0.30102999 | 4  | 0 | 0.76005302 | 0          |
| chr2 | 5309018   | 5494126   | 185109 | 2  | 1  | 2 | 0.01091641 | 0.61140001 | 4  | 0 | 0.76005302 | 0          |
| chr2 | 5494126   | 5727968   | 233843 | 2  | 1  | 2 | 0.02438896 | 0.61140001 | 3  | 0 | 0.51676182 | 0          |
| chr2 | 5727968   | 5838952   | 110985 | 1  | 1  | 1 | 0.02438896 | 0.30102999 | 3  | 0 | 0.51676182 | 0          |
| chr2 | 5838952   | 6016525   | 177574 | 1  | 1  | 1 | 0.05404976 | 0.30102999 | 2  | 0 | 0.30102999 | 0          |
| chr2 | 6016525   | 6135104   | 118580 | 1  | 1  | 0 | 0.05404976 | 0          | 2  | 0 | 0.30102999 | 0          |
| chr2 | 6135104   | 6135163   | 60     | 1  | 1  | 1 | 0.00478973 | 0.1218695  | 5  | 1 | 1.02643191 | 0.1218695  |
| chr2 | 6135163   | 6559225   | 424063 | 2  | 0  | 1 | 0          | 0.1218695  | 4  | 1 | 1.26272838 | 0.1218695  |
| chr2 | 6559225   | 6559284   | 60     | 1  | 2  | 2 | 0.01091641 | 0.1575501  | 4  | 2 | 0.76005302 | 0.1575501  |
| chr2 | 6559284   | 6631393   | 72110  | 1  | 2  | 2 | 0.02438896 | 0.1575501  | 3  | 2 | 0.51676182 | 0.1575501  |
| chr2 | 6631393   | 6772153   | 140761 | 1  | 1  | 1 | 0.05404976 | 0.05404976 | 2  | 2 | 0.30102999 | 0.30102999 |
| chr2 | 6772153   | 6772212   | 60     | 1  | 2  | 2 | 0.02438896 | 0.1575501  | 3  | 2 | 0.51676182 | 0.1575501  |
| chr2 | 6772212   | 6872681   | 100470 | 1  | 1  | 1 | 0.02438896 | 0.05404976 | 2  | 2 | 0.51676182 | 0.30102999 |
| chr2 | 6872681   | 6872740   | 60     | 1  | 2  | 2 | 0.0828918  | 0.05404976 | 3  | 3 | 0.30102999 | 0.30102999 |
| chr2 | 6872740   | 7182324   | 309585 | 6  | 2  | 1 | 0.0828918  | 0.1218695  | 3  | 1 | 0.30102999 | 0.1218695  |
| chr2 | 7182324   | 7304259   | 21936  | 2  | 4  | 3 | 0.10122019 | 0.05404976 | 2  | 4 | 0.30102999 | 0.30102999 |
| chr2 | 7304259   | 7669507   | 365249 | 3  | 2  | 1 | 0.0429175  | 0.1218695  | 4  | 1 | 0.47744371 | 0.1218695  |
| chr2 | 7669507   | 7669566   | 60     | 1  | 2  | 2 | 0.0429175  | 0.1575501  | 4  | 2 | 0.47744371 | 0.1575501  |
| chr2 | 7669566   | 7760558   | 90993  | 2  | 1  | 1 | 0.0429175  | 0.05404976 | 2  | 2 | 0.47744371 | 0.30102999 |
| chr2 | 7760558   | 8046583   | 286026 | 3  | 1  | 1 | 0.01091641 | 0.05404976 | 4  | 2 | 0.76005302 | 0.30102999 |
| chr2 | 8046583   | 8113345   | 66763  | 1  | 0  | 1 | 0          | 0.05404976 | 4  | 2 | 1.26272838 | 0.30102999 |
| chr2 | 8113345   | 8113404   | 60     | 1  | 1  | 1 | 0.01091641 | 0.05404976 | 4  | 2 | 0.76005302 | 0.30102999 |
| chr2 | 8113404   | 8260791   | 147388 | 2  | 1  | 0 | 0.01091641 | 0          | 2  | 2 | 0.76005302 | 0.61140001 |
| chr2 | 8260791   | 8260850   | 60     | 1  | 2  | 2 | 0.0429175  | 0          | 4  | 2 | 0.47744371 | 0.61140001 |
| chr2 | 8260850   | 8809143   | 548294 | 4  | 2  | 0 | 0.0429175  | 0          | 1  | 1 | 0.47744371 | 0.30102999 |
| chr2 | 8809143   | 9217329   | 408187 | 8  | 2  | 2 | 0.0429175  | 0.1575501  | 4  | 2 | 0.47744371 | 0.1575501  |
| chr2 | 9217329   | 9364692   | 147364 | 2  | 2  | 1 | 0.0429175  | 0.1218695  | 1  | 1 | 0.47744371 | 0.1218695  |
| chr2 | 9364692   | 9453436   | 88745  | 2  | 1  | 1 | 0.0429175  | 0.05404976 | 4  | 2 | 0.47744371 | 0.30102999 |
| chr2 | 9453436   | 9549012   | 95577  | 2  | 2  | 1 | 0.0429175  | 0.1218695  | 4  | 1 | 0.47744371 | 0.1218695  |
| chr2 | 9549012   | 9633089   | 84078  | 2  | 2  | 1 | 0.0429175  | 0.05404976 | 4  | 2 | 0.47744371 | 0.30102999 |
| chr2 | 9633089   | 9633148   | 60     | 1  | 2  | 2 | 0.0429175  | 0.0828918  | 3  | 3 | 0.47744371 | 0.30102999 |
| chr2 | 9633148   | 9766950   | 133803 | 4  | 2  | 1 | 0.0429175  | 0.02438896 | 4  | 3 | 0.47744371 | 0.51676182 |
| chr2 | 9766950   | 9767009   | 60     | 1  | 3  | 1 | 0.10122019 | 0.02438896 | 4  | 3 | 0.30102999 | 0.51676182 |
| chr2 | 9767009   | 9955630   | 188622 | 2  | 3  | 1 | 0.10122019 | 0.05404976 | 2  | 0 | 0.30102999 | 0.30102999 |
| chr2 | 9955630   | 10348261  | 392632 | 10 | 3  | 2 | 0.10122019 | 0.0828918  | 4  | 3 | 0.30102999 | 0.30102999 |
| chr2 | 10348261  | 10454342  | 106082 | 2  | 3  | 2 | 0.10122019 | 0.1575501  | 4  | 2 | 0.30102999 | 0.1575501  |
| chr2 | 10454342  | 10454401  | 60     | 1  | 4  | 2 | 0.18734596 | 0.0828918  | 4  | 3 | 0.18734596 | 0.30102999 |
| chr2 | 10454401  | 10490106  | 35706  | 1  | 4  | 2 | 0.18734596 | 0.1575501  | 4  | 2 | 0.18734596 | 0.1575501  |
| chr2 | 10490106  | 10526561  | 36456  | 2  | 5  | 2 | 0.30102999 | 0.1575501  | 4  | 2 | 0.11390326 | 0.1575501  |
| chr2 | 10526561  | 10711719  | 185159 | 5  | 4  | 2 | 0.18734596 | 0.1575501  | 4  | 2 | 0.18734596 | 0.157550   |

|      |          |          |        |    |   |   |            |            |   |   |            |            |
|------|----------|----------|--------|----|---|---|------------|------------|---|---|------------|------------|
| chr2 | 16185337 | 16409634 | 224298 | 1  | 1 | 2 | 0.00478973 | 0.1575501  | 5 | 2 | 1.02643191 | 0.1575501  |
| chr2 | 16409634 | 16409693 | 60     | 1  | 2 | 2 | 0.02162467 | 0.1575501  | 5 | 2 | 0.68214471 | 0.1575501  |
| chr2 | 16409693 | 16632311 | 222619 | 1  | 1 | 2 | 0.00478973 | 0.30102999 | 5 | 1 | 1.02643191 | 0.05404976 |
| chr2 | 16632311 | 16733900 | 101590 | 1  | 1 | 1 | 0.00478973 | 0.30102999 | 5 | 0 | 1.02643191 | 0          |
| chr2 | 16733900 | 16733959 | 60     | 1  | 2 | 1 | 0.02162467 | 0.30102999 | 5 | 0 | 0.68214471 | 0          |
| chr2 | 16733959 | 16769329 | 35371  | 1  | 2 | 0 | 0.02162467 | 0          | 5 | 0 | 0.68214471 | 0          |
| chr2 | 16769329 | 16805169 | 35841  | 2  | 3 | 0 | 0.05670724 | 0          | 5 | 0 | 0.45545077 | 0          |
| chr2 | 16805169 | 16842257 | 37089  | 1  | 2 | 0 | 0.02162467 | 0          | 5 | 0 | 0.68214471 | 0          |
| chr2 | 16842257 | 17005054 | 162798 | 1  | 2 | 0 | 0.0429175  | 0          | 4 | 0 | 0.47744371 | 0          |
| chr2 | 17005054 | 17046079 | 41026  | 2  | 3 | 1 | 0.05670724 | 0.05404976 | 5 | 2 | 0.45545077 | 0.30102999 |
| chr2 | 17046079 | 17046138 | 60     | 1  | 3 | 1 | 0.03070643 | 0.05404976 | 6 | 2 | 0.63695542 | 0.30102999 |
| chr2 | 17046138 | 17113351 | 67214  | 1  | 2 | 0 | 0.01053319 | 0          | 6 | 0 | 0.91219088 | 0          |
| chr2 | 17113351 | 17371225 | 257875 | 2  | 1 | 0 | 0.00204627 | 0          | 6 | 0 | 1.31360226 | 0          |
| chr2 | 17371225 | 17371284 | 60     | 1  | 2 | 0 | 0.01053319 | 0          | 6 | 1 | 0.91219088 | 0.30102999 |
| chr2 | 17371284 | 17447798 | 76515  | 1  | 2 | 0 | 0.01053319 | 0          | 6 | 0 | 0.91219088 | 0          |
| chr2 | 17447798 | 17657171 | 209374 | 4  | 3 | 0 | 0.03070643 | 0          | 6 | 0 | 0.63695542 | 0          |
| chr2 | 17657171 | 17750698 | 93528  | 1  | 2 | 0 | 0.01053319 | 0          | 6 | 0 | 0.91219088 | 0          |
| chr2 | 17750698 | 17837399 | 86702  | 2  | 1 | 0 | 0.00478973 | 0          | 5 | 0 | 1.02643191 | 0          |
| chr2 | 17837399 | 17846623 | 9225   | 2  | 1 | 0 | 0.00204627 | 0          | 6 | 0 | 1.31360226 | 0          |
| chr2 | 17846623 | 18031185 | 184563 | 6  | 1 | 1 | 0.00204627 | 0.1218695  | 6 | 1 | 1.31360226 | 0.1218695  |
| chr2 | 18031185 | 18355851 | 328667 | 5  | 1 | 0 | 0.00478973 | 0          | 5 | 1 | 1.02643191 | 0.30102999 |
| chr2 | 18355851 | 18355910 | 60     | 1  | 1 | 0 | 0.00478973 | 0.05404976 | 5 | 2 | 1.02643191 | 0.30102999 |
| chr2 | 18355910 | 18447369 | 87460  | 1  | 1 | 0 | 0.00478973 | 0          | 5 | 2 | 1.02643191 | 0.61140001 |
| chr2 | 18447369 | 18447428 | 60     | 1  | 2 | 0 | 0.02162467 | 0          | 5 | 2 | 0.68214471 | 0.61140001 |
| chr2 | 18447428 | 18736359 | 288932 | 2  | 1 | 0 | 0.00478973 | 0          | 5 | 2 | 1.02643191 | 0.61140001 |
| chr2 | 18736359 | 18770751 | 34393  | 3  | 2 | 0 | 0.02162467 | 0          | 5 | 2 | 0.68214471 | 0.61140001 |
| chr2 | 18770751 | 18829052 | 58302  | 1  | 2 | 0 | 0.0429175  | 0          | 4 | 2 | 0.47744371 | 0.61140001 |
| chr2 | 18829052 | 18829111 | 60     | 1  | 2 | 0 | 0.0429175  | 0          | 4 | 3 | 0.47744371 | 0.93173516 |
| chr2 | 18829111 | 18951650 | 122540 | 1  | 2 | 0 | 0.0429175  | 0          | 4 | 1 | 0.47744371 | 0.30102999 |
| chr2 | 18951650 | 18951709 | 60     | 1  | 2 | 0 | 0.02162467 | 0          | 5 | 1 | 0.68214471 | 0.30102999 |
| chr2 | 18951709 | 19250159 | 298451 | 2  | 2 | 0 | 0.0429175  | 0          | 4 | 0 | 0.47744371 | 0          |
| chr2 | 19250159 | 19427196 | 177038 | 3  | 1 | 0 | 0.0429175  | 0.30102999 | 4 | 0 | 0.47744371 | 0          |
| chr2 | 19427196 | 19427255 | 60     | 1  | 4 | 2 | 0.18734596 | 0.61140001 | 4 | 0 | 0.18734596 | 0          |
| chr2 | 19427255 | 19553993 | 126739 | 2  | 2 | 2 | 0.0429175  | 0.61140001 | 4 | 0 | 0.47744371 | 0          |
| chr2 | 19553993 | 19679049 | 125057 | 2  | 2 | 2 | 0.02162467 | 0.30102999 | 5 | 1 | 0.68214471 | 0.05404976 |
| chr2 | 19679049 | 19679108 | 60     | 1  | 3 | 2 | 0.05670724 | 0.30102999 | 5 | 1 | 0.45545077 | 0.05404976 |
| chr2 | 19679108 | 19934222 | 255115 | 1  | 2 | 1 | 0.02162467 | 0.30102999 | 5 | 0 | 0.68214471 | 0          |
| chr2 | 19934222 | 20073352 | 139131 | 2  | 2 | 1 | 0.01053319 | 0.30102999 | 6 | 0 | 0.91219088 | 0          |
| chr2 | 20073352 | 20196868 | 123517 | 4  | 3 | 1 | 0.03070643 | 0.30102999 | 6 | 0 | 0.63695542 | 0          |
| chr2 | 20196868 | 20205537 | 8670   | 3  | 2 | 0 | 0.03070643 | 0.61140001 | 6 | 0 | 0.63695542 | 0          |
| chr2 | 20205537 | 20247845 | 42309  | 1  | 2 | 2 | 0.01053319 | 0.61140001 | 6 | 0 | 0.91219088 | 0          |
| chr2 | 20247845 | 20273355 | 25511  | 1  | 2 | 0 | 0.00204627 | 0.61140001 | 6 | 0 | 1.31360226 | 0          |
| chr2 | 20273355 | 20401961 | 128607 | 2  | 1 | 1 | 0.00204627 | 0.30102999 | 6 | 0 | 1.31360226 | 0          |
| chr2 | 20401961 | 20405187 | 3227   | 2  | 2 | 2 | 0.00204627 | 0.61140001 | 6 | 0 | 1.31360226 | 0          |
| chr2 | 20405187 | 20990162 | 584976 | 11 | 1 | 2 | 0.00478973 | 0.61140001 | 5 | 0 | 1.02643191 | 0          |
| chr2 | 20990162 | 21247202 | 257041 | 3  | 0 | 2 | 0.61140001 | 0          | 5 | 0 | 1.60515106 | 0          |
| chr2 | 21247202 | 21634471 | 387270 | 5  | 0 | 2 | 0.61140001 | 0          | 4 | 0 | 1.26272838 | 0          |
| chr2 | 21634471 | 21914332 | 279862 | 0  | 0 | 2 | 0.61140001 | 0          | 3 | 0 | 0.93173516 | 0          |
| chr2 | 21914332 | 22117705 | 203374 | 3  | 0 | 2 | 0.61140001 | 0          | 4 | 0 | 1.26272838 | 0          |
| chr2 | 22117705 | 22117764 | 60     | 1  | 3 | 4 | 0.01091641 | 0.51676182 | 4 | 1 | 0.76005302 | 0.02438896 |
| chr2 | 22117764 | 22363942 | 246179 | 2  | 0 | 3 | 0          | 0.93173516 | 3 | 0 | 0.93173516 | 0          |
| chr2 | 22363942 | 22364001 | 60     | 1  | 3 | 0 | 0          | 0.51676182 | 3 | 1 | 0.93173516 | 0.02438896 |
| chr2 | 22364001 | 22599910 | 235910 | 4  | 0 | 1 | 0          | 0.30102999 | 3 | 0 | 0.93173516 | 0          |
| chr2 | 22599910 | 22599969 | 60     | 1  | 1 | 3 | 0.02438896 | 0.51676182 | 3 | 0 | 0.51676182 | 0.02438896 |
| chr2 | 22599969 | 22756131 | 156163 | 1  | 1 | 1 | 0.02438896 | 0.1218695  | 3 | 0 | 0.51676182 | 0.1218695  |
| chr2 | 22756131 | 22891684 | 135554 | 1  | 1 | 0 | 0.02438896 | 0          | 3 | 1 | 0.51676182 | 0.30102999 |
| chr2 | 22891684 | 23050393 | 158710 | 2  | 1 | 2 | 0.02438896 | 0.30102999 | 3 | 2 | 0.51676182 | 0.05404976 |
| chr2 | 23050393 | 23364285 | 313893 | 4  | 1 | 2 | 0.02438896 | 0.1575501  | 3 | 2 | 0.51676182 | 0.1575501  |
| chr2 | 23364285 | 23565295 | 201011 | 2  | 1 | 2 | 0.01091641 | 0.1575501  | 4 | 2 | 0.76005302 | 0.1575501  |
| chr2 | 23565295 | 23719143 | 153849 | 3  | 2 | 2 | 0.02162467 | 0.1575501  | 5 | 2 | 0.68214471 | 0.1575501  |
| chr2 | 23719143 | 24480925 | 761783 | 18 | 2 | 2 | 0.02162467 | 0.05404976 | 5 | 2 | 0.68214471 | 0.30102999 |
| chr2 | 24480925 | 24572616 | 91692  | 2  | 1 | 1 | 0.0429175  | 0.05404976 | 4 | 2 | 0.47744371 | 0.30102999 |
| chr2 | 24572616 | 24929887 | 357272 | 6  | 2 | 1 | 0.02162467 | 0.05404976 | 6 | 2 | 0.68214471 | 0.30102999 |
| chr2 | 24929887 | 24929946 | 60     | 1  | 2 | 1 | 0.01053319 | 0.05404976 | 6 | 2 | 0.91219088 | 0.30102999 |
| chr2 | 24929946 | 25294614 | 364669 | 10 | 2 | 1 | 0.02162467 | 0.05404976 | 5 | 2 | 0.68214471 | 0.30102999 |
| chr2 | 25294614 | 25456738 | 152125 | 3  | 2 | 1 | 0.02162467 | 0.1218695  | 4 | 1 | 0.68214471 | 0.1218695  |
| chr2 | 25456738 | 25888918 | 43181  | 10 | 2 | 1 | 0.02162467 | 0.30102999 | 6 | 0 | 0.68214471 | 0          |
| chr2 | 25888918 | 25964522 | 75605  | 4  | 1 | 1 | 0.11390336 | 0.30102999 | 5 | 0 | 0.30102999 | 0          |
| chr2 | 25964522 | 25964581 | 60     | 1  | 5 | 1 | 0.19510895 | 0.30102999 | 5 | 0 | 0.19510895 | 0          |
| chr2 | 25964581 | 26029091 | 64511  | 1  | 2 | 1 | 0.02162467 | 0.30102999 | 5 | 0 | 0.68214471 | 0          |
| chr2 | 26029091 | 26068375 | 39285  | 2  | 2 | 1 | 0.02162467 | 0.1218695  | 5 | 1 | 0.68214471 | 0.1218695  |
| chr2 | 26068375 | 26068434 | 60     | 1  | 3 | 1 | 0.05670724 | 0.1218695  | 5 | 1 | 0.45545077 | 0.1218695  |
| chr2 | 26068434 | 26085264 | 16831  | 1  | 3 | 1 | 0.05670724 | 0.30102999 | 5 | 0 | 0.45545077 | 0          |
| chr2 | 26085264 | 26149727 | 64464  | 2  | 4 | 1 | 0.11390336 | 0.30102999 | 5 | 0 | 0.30102999 | 0          |
| chr2 | 26149727 | 26149786 | 60     | 1  | 4 | 1 | 0.11390336 | 0.1218695  | 5 | 1 | 0.30102999 | 0.1218695  |
| chr2 | 26149786 | 26199908 | 50123  | 1  | 2 | 1 | 0.02162467 | 0.1218695  | 5 | 1 | 0.68214471 | 0.1218695  |
| chr2 | 26199908 | 26257541 | 57634  | 2  | 2 | 2 | 0.02162467 | 0.30102999 | 5 | 1 | 0.68214471 | 0.05404976 |
| chr2 | 26257541 | 26257596 | 56     | 1  | 3 | 2 | 0.05670724 | 0.30102999 | 5 | 1 | 0.45545077 | 0.05404976 |
| chr2 | 26257596 | 26321308 | 63713  | 2  | 2 | 2 | 0.02162467 | 0.30102999 | 5 | 1 | 0.68214471 | 0.05404976 |
| chr2 | 26321308 | 26321367 | 60     | 1  | 4 | 2 | 0.11390336 | 0.30102999 | 5 | 1 | 0.30102999 | 0.05404976 |
| chr2 | 26321367 | 26437398 | 116032 | 3  | 3 | 2 | 0.05670724 | 0.30102999 | 5 | 1 | 0.45545077 | 0.05404976 |
| chr2 | 26437398 | 26477168 | 39771  | 2  | 4 | 2 | 0.11390336 | 0.30102999 | 5 | 1 | 0.30102999 | 0.05404976 |
| chr2 | 26477168 | 26533191 | 56024  | 1  | 3 | 2 | 0.05670724 | 0.30102999 | 5 | 1 | 0.45545077 | 0.05404976 |
| chr2 | 26533191 | 26533250 | 60     | 1  | 3 | 2 | 0.03070643 | 0.30102999 | 6 | 1 | 0.63695542 | 0.05404976 |
| chr2 | 26533250 | 26584974 | 51725  | 1  | 2 | 2 | 0.01053319 | 0.30102999 | 6 | 1 | 0.91219088 | 0.05404976 |
| chr2 | 26584974 | 26750699 | 165726 | 4  | 2 | 2 | 0.02162467 | 0.30102999 | 5 | 1 | 0.68214471 | 0.05404976 |
| chr2 | 26750699 | 26750754 | 56     | 1  | 3 | 2 | 0.05670724 | 0.30102999 | 5 | 1 | 0.45545077 | 0.05404976 |
| chr2 | 26750754 | 26823339 | 72586  | 2  | 2 | 2 | 0.02162467 | 0.30102999 | 5 | 1 | 0.68214471 | 0.05404976 |
| chr2 | 26823339 | 26823398 | 60     | 1  | 2 | 2 | 0.05670724 | 0.30102999 | 5 | 1 | 0.45545077 | 0.05404976 |
| chr2 | 26823398 | 26895639 | 72242  | 2  | 2 | 2 | 0.02162467 | 0.30102999 | 5 | 1 | 0.68214471 | 0.05404976 |
| chr2 | 26895639 | 26895698 | 60     | 1  | 3 | 2 | 0.05670724 | 0.30102999 | 5 | 1 | 0.45545077 | 0.05404976 |
| chr2 | 26895698 | 27000109 | 104412 | 3  | 2 | 2 | 0.02162467 | 0.30102999 | 5 | 1 | 0.68214471 | 0.05404976 |
| chr2 | 27000109 | 27000168 | 60     | 1  | 3 | 2 | 0.05670724 | 0.30102999 | 5 | 1 | 0.45545077 | 0.05404976 |
| chr2 | 27000168 | 27088538 | 88371  | 5  | 2 | 2 | 0.02162467 | 0.30102999 | 5 | 1 | 0.68214471 | 0.05404976 |
| chr2 | 27088538 | 27172128 | 83591  | 4  |   |   |            |            |   |   |            |            |

|      |          |          |        |    |   |   |            |            |    |   |            |            |
|------|----------|----------|--------|----|---|---|------------|------------|----|---|------------|------------|
| chr2 | 28637284 | 28659295 | 22012  | 1  | 3 | 0 | 0.05670724 | 0          | 5  | 1 | 0.45545077 | 0.30102999 |
| chr2 | 28659295 | 28791353 | 132059 | 2  | 2 | 0 | 0.02162467 | 0          | 5  | 1 | 0.68214471 | 0.30102999 |
| chr2 | 28791353 | 28863297 | 71945  | 3  | 3 | 0 | 0.05670724 | 0          | 5  | 1 | 0.45545077 | 0.30102999 |
| chr2 | 28863297 | 28863356 | 60     | 1  | 4 | 0 | 0.11390336 | 0          | 5  | 1 | 0.30102999 | 0.30102999 |
| chr2 | 28863356 | 28984459 | 121104 | 2  | 3 | 0 | 0.10122019 | 0          | 4  | 1 | 0.30102999 | 0.30102999 |
| chr2 | 28984459 | 29058634 | 74176  | 3  | 4 | 0 | 0.18734596 | 0          | 4  | 1 | 0.18734596 | 0.30102999 |
| chr2 | 29058634 | 29058693 | 60     | 1  | 5 | 0 | 0.30102999 | 0          | 4  | 1 | 0.11390336 | 0.30102999 |
| chr2 | 29058693 | 29146504 | 87812  | 3  | 2 | 0 | 0.0429175  | 0          | 4  | 0 | 0.47744371 | 0          |
| chr2 | 29146504 | 29213106 | 66603  | 3  | 3 | 0 | 0.10122019 | 0          | 4  | 0 | 0.30102999 | 0          |
| chr2 | 29213106 | 29266508 | 53403  | 1  | 2 | 0 | 0.0429175  | 0          | 4  | 0 | 0.47744371 | 0          |
| chr2 | 29266508 | 29266567 | 60     | 1  | 2 | 0 | 0.0429175  | 0          | 4  | 1 | 0.47744371 | 0.30102999 |
| chr2 | 29266567 | 29449922 | 183356 | 5  | 1 | 0 | 0.01091641 | 0          | 4  | 1 | 0.76005302 | 0.30102999 |
| chr2 | 29449922 | 29604618 | 154697 | 3  | 0 | 0 | 0          | 0          | 4  | 1 | 1.26272838 | 0.30102999 |
| chr2 | 29604618 | 29604677 | 60     | 1  | 1 | 0 | 0.01091641 | 0          | 4  | 0 | 0.76005302 | 0.30102999 |
| chr2 | 29604677 | 29851069 | 246393 | 6  | 0 | 0 | 0          | 0          | 4  | 1 | 1.26272838 | 0.30102999 |
| chr2 | 29851069 | 30049401 | 198333 | 5  | 1 | 0 | 0.01091641 | 0          | 4  | 1 | 0.76005302 | 0.30102999 |
| chr2 | 30049401 | 30049460 | 60     | 1  | 2 | 0 | 0.0429175  | 0          | 4  | 1 | 0.47744371 | 0.30102999 |
| chr2 | 30049460 | 30259646 | 210187 | 2  | 1 | 0 | 0.01091641 | 0          | 4  | 1 | 0.76005302 | 0.30102999 |
| chr2 | 30259646 | 30301261 | 41616  | 2  | 2 | 0 | 0.0429175  | 0          | 4  | 1 | 0.47744371 | 0.30102999 |
| chr2 | 30301261 | 30466094 | 164834 | 3  | 1 | 0 | 0.01091641 | 0          | 4  | 1 | 0.76005302 | 0.30102999 |
| chr2 | 30466094 | 30559170 | 93077  | 2  | 1 | 0 | 0.02438996 | 0          | 3  | 1 | 0.51676182 | 0.30102999 |
| chr2 | 30559170 | 30671022 | 111853 | 2  | 1 | 0 | 0.01091641 | 0          | 4  | 1 | 0.76005302 | 0.30102999 |
| chr2 | 30671022 | 30671081 | 60     | 1  | 1 | 0 | 0.00478973 | 0          | 5  | 1 | 1.02643191 | 0.30102999 |
| chr2 | 30671081 | 30790983 | 119903 | 2  | 4 | 1 | 0.01091641 | 0          | 4  | 1 | 0.76005302 | 0.30102999 |
| chr2 | 30790983 | 30832151 | 41169  | 4  | 1 | 0 | 0.00478973 | 0          | 5  | 1 | 1.02643191 | 0.30102999 |
| chr2 | 30832151 | 31048002 | 215852 | 5  | 1 | 0 | 0.01091641 | 0          | 4  | 1 | 0.76005302 | 0.30102999 |
| chr2 | 31048002 | 31091267 | 43266  | 1  | 1 | 0 | 0.02438996 | 0          | 3  | 1 | 0.51676182 | 0.30102999 |
| chr2 | 31091267 | 31190168 | 98902  | 2  | 1 | 0 | 0.05404976 | 0          | 2  | 1 | 0.30102999 | 0.30102999 |
| chr2 | 31190168 | 31249841 | 59674  | 1  | 1 | 0 | 0.02438996 | 0          | 3  | 1 | 0.51676182 | 0.30102999 |
| chr2 | 31249841 | 31348131 | 98291  | 3  | 2 | 0 | 0.02829918 | 0          | 3  | 1 | 0.30102999 | 0.30102999 |
| chr2 | 31348131 | 31348190 | 60     | 1  | 2 | 0 | 0.0429175  | 0          | 4  | 1 | 0.47744371 | 0.30102999 |
| chr2 | 31348190 | 31637483 | 289294 | 6  | 2 | 0 | 0.0429175  | 0          | 4  | 0 | 0.47744371 | 0          |
| chr2 | 31637483 | 31637539 | 57     | 1  | 2 | 1 | 0.0429175  | 0.30102999 | 4  | 0 | 0.47744371 | 0          |
| chr2 | 31637539 | 31870146 | 232608 | 4  | 2 | 0 | 0.0429175  | 0          | 4  | 0 | 0.47744371 | 0          |
| chr2 | 31870146 | 31962996 | 92851  | 2  | 3 | 0 | 0.10122019 | 0          | 4  | 0 | 0.30102999 | 0          |
| chr2 | 31962996 | 31963055 | 60     | 1  | 4 | 0 | 0.18734596 | 0          | 4  | 0 | 0.18734596 | 0          |
| chr2 | 31963055 | 32060696 | 97642  | 1  | 3 | 0 | 0.10122019 | 0          | 4  | 0 | 0.30102999 | 0          |
| chr2 | 32060696 | 32113726 | 53031  | 2  | 4 | 0 | 0.18734596 | 0          | 4  | 0 | 0.18734596 | 0          |
| chr2 | 32113726 | 32113785 | 60     | 1  | 6 | 0 | 0.30102999 | 0          | 5  | 0 | 1.12309572 | 0          |
| chr2 | 32113785 | 32210207 | 96423  | 2  | 5 | 0 | 0.19510895 | 0          | 5  | 0 | 0.19510895 | 0          |
| chr2 | 32210207 | 32257547 | 47341  | 2  | 6 | 0 | 0.20064824 | 0          | 6  | 0 | 0.20064824 | 0          |
| chr2 | 32257547 | 32257606 | 60     | 1  | 8 | 0 | 0.4250187  | 0          | 6  | 0 | 0.08122616 | 0          |
| chr2 | 32257606 | 32357069 | 99464  | 2  | 8 | 0 | 0.58747015 | 0          | 5  | 0 | 0.04407651 | 0          |
| chr2 | 32357069 | 32357128 | 60     | 1  | 0 | 0 | 0.76806864 | 0          | 5  | 0 | 0.02473314 | 0          |
| chr2 | 32357128 | 32418978 | 61851  | 2  | 7 | 0 | 0.43181735 | 0          | 5  | 0 | 0.07511598 | 0          |
| chr2 | 32418978 | 32419036 | 59     | 1  | 8 | 0 | 0.58747015 | 0          | 5  | 0 | 0.04407651 | 0          |
| chr2 | 32419036 | 32490104 | 71069  | 2  | 7 | 0 | 0.43181735 | 0          | 5  | 0 | 0.07511598 | 0          |
| chr2 | 32490104 | 32526494 | 36391  | 3  | 8 | 0 | 0.4250187  | 0          | 6  | 0 | 0.08122616 | 0          |
| chr2 | 32526494 | 32606111 | 79618  | 2  | 7 | 0 | 0.43181735 | 0          | 5  | 0 | 0.07511598 | 0          |
| chr2 | 32606111 | 32606170 | 60     | 1  | 8 | 0 | 0.58747015 | 0          | 5  | 0 | 0.04407651 | 0          |
| chr2 | 32606170 | 32747742 | 141573 | 3  | 7 | 0 | 0.43181735 | 0          | 5  | 0 | 0.07511598 | 0          |
| chr2 | 32747742 | 32747801 | 60     | 1  | 9 | 0 | 0.76806864 | 0          | 5  | 0 | 0.02473314 | 0          |
| chr2 | 32747801 | 32858980 | 111180 | 4  | 8 | 0 | 0.58747015 | 0          | 5  | 0 | 0.04407651 | 0          |
| chr2 | 32858980 | 32958900 | 99921  | 3  | 7 | 0 | 0.43181735 | 0          | 5  | 0 | 0.07511598 | 0          |
| chr2 | 32958900 | 33090028 | 131129 | 4  | 7 | 0 | 0.30102999 | 0          | 6  | 0 | 0.129913   | 0          |
| chr2 | 33090028 | 33121645 | 31618  | 1  | 6 | 0 | 0.30102999 | 0          | 5  | 0 | 0.12309572 | 0          |
| chr2 | 33121645 | 33216675 | 95031  | 2  | 5 | 0 | 0.19510895 | 0          | 5  | 0 | 0.19510895 | 0          |
| chr2 | 33216675 | 33249136 | 32462  | 2  | 5 | 1 | 0.12309572 | 0.30102999 | 6  | 0 | 0.30102999 | 0          |
| chr2 | 33249136 | 33294782 | 45647  | 1  | 3 | 1 | 0.03070643 | 0.30102999 | 6  | 0 | 0.63695542 | 0          |
| chr2 | 33294782 | 33370251 | 75470  | 1  | 3 | 1 | 0.05670724 | 0.30102999 | 5  | 0 | 0.45545077 | 0          |
| chr2 | 33370251 | 33505157 | 134907 | 2  | 2 | 0 | 0.02162467 | 0          | 5  | 0 | 0.68214471 | 0          |
| chr2 | 33505157 | 33562398 | 57242  | 1  | 2 | 0 | 0.0429175  | 0          | 4  | 0 | 0.47744371 | 0          |
| chr2 | 33562398 | 33562457 | 60     | 1  | 2 | 0 | 0.02162467 | 0          | 5  | 0 | 0.68214471 | 0          |
| chr2 | 33562457 | 33590377 | 27921  | 2  | 0 | 0 | 0.0429175  | 0          | 4  | 0 | 0.47744371 | 0          |
| chr2 | 33590377 | 33585068 | 64692  | 3  | 2 | 0 | 0.02162467 | 0          | 5  | 0 | 0.68214471 | 0          |
| chr2 | 33585068 | 33892197 | 337130 | 9  | 3 | 0 | 0.05670724 | 0          | 5  | 0 | 0.45545077 | 0          |
| chr2 | 33892197 | 34009362 | 38166  | 3  | 3 | 0 | 0.03070643 | 0          | 6  | 0 | 0.63695542 | 0          |
| chr2 | 34009362 | 34533415 | 443054 | 7  | 2 | 0 | 0.01053319 | 0          | 6  | 0 | 0.91219088 | 0          |
| chr2 | 34533415 | 34533474 | 60     | 1  | 3 | 0 | 0.03070643 | 0          | 6  | 0 | 0.63695542 | 0          |
| chr2 | 34533474 | 34627053 | 93580  | 2  | 3 | 0 | 0.05670724 | 0          | 5  | 0 | 0.45545077 | 0          |
| chr2 | 34627053 | 34727088 | 100036 | 3  | 3 | 0 | 0.03070643 | 0          | 6  | 0 | 0.63695542 | 0          |
| chr2 | 34727088 | 34773844 | 46757  | 1  | 1 | 0 | 0.00204627 | 0          | 6  | 0 | 1.31360226 | 0          |
| chr2 | 34773844 | 34773903 | 60     | 1  | 1 | 0 | 8.47E-04   | 0          | 7  | 1 | 1.62048027 | 0          |
| chr2 | 34773903 | 34881322 | 107420 | 3  | 1 | 0 | 0.00204627 | 0          | 6  | 0 | 1.31360226 | 0          |
| chr2 | 34881322 | 34881381 | 60     | 1  | 2 | 0 | 0.01053319 | 0          | 6  | 0 | 0.91219088 | 0          |
| chr2 | 34881381 | 34915000 | 33620  | 1  | 1 | 0 | 0.00204627 | 0          | 6  | 0 | 1.31360226 | 0          |
| chr2 | 34915000 | 34956442 | 41443  | 2  | 1 | 0 | 8.47E-04   | 0          | 7  | 1 | 1.62048027 | 0          |
| chr2 | 34956442 | 34993128 | 36687  | 1  | 1 | 0 | 0.00204627 | 0          | 6  | 0 | 1.31360226 | 0          |
| chr2 | 34993128 | 35047843 | 54716  | 2  | 2 | 0 | 0.01053319 | 0          | 6  | 0 | 0.91219088 | 0          |
| chr2 | 35047843 | 35200938 | 153096 | 3  | 1 | 0 | 0.00204627 | 0          | 6  | 0 | 1.31360226 | 0          |
| chr2 | 35200938 | 35359594 | 158657 | 4  | 2 | 0 | 0.01053319 | 0          | 6  | 0 | 0.91219088 | 0          |
| chr2 | 35359594 | 35507967 | 148374 | 5  | 3 | 0 | 0.03070643 | 0          | 6  | 0 | 0.63695542 | 0          |
| chr2 | 35507967 | 35508026 | 60     | 1  | 4 | 0 | 0.03812622 | 0          | 7  | 0 | 0.60763643 | 0          |
| chr2 | 35508026 | 36305915 | 797890 | 17 | 3 | 0 | 0.03070643 | 0          | 6  | 0 | 0.63695542 | 0          |
| chr2 | 36305915 | 36490157 | 184243 | 1  | 0 | 0 | 0.00204627 | 0          | 6  | 0 | 1.31360226 | 0          |
| chr2 | 36490157 | 36623837 | 133681 | 4  | 2 | 0 | 0.01053319 | 0          | 6  | 0 | 0.91219088 | 0          |
| chr2 | 36623837 | 36704029 | 80193  | 1  | 2 | 0 | 0.02162467 | 0          | 5  | 0 | 0.68214471 | 0          |
| chr2 | 36704029 | 36704088 | 60     | 1  | 2 | 0 | 0.00493743 | 0          | 7  | 0 | 1.16581773 | 0          |
| chr2 | 36704088 | 36732225 | 28138  | 2  | 0 | 0 | 0.01053319 | 0          | 6  | 0 | 0.91219088 | 0          |
| chr2 | 36732225 | 36956588 | 224364 | 6  | 2 | 0 | 0.00493743 | 0          | 7  | 0 | 1.16581773 | 0          |
| chr2 | 36956588 | 37255890 | 299303 | 9  | 2 | 0 | 9.54E-04   | 0          | 9  | 0 | 1.74076927 | 0          |
| chr2 | 37255890 | 37315544 | 59655  | 2  | 3 | 0 | 0.00378107 | 0          | 9  | 0 | 1.33111237 | 0          |
| chr2 | 37315544 | 37363800 | 48257  | 3  | 1 | 0 | 0.00378107 | 0.30102999 | 9  | 0 | 1.33111237 | 0          |
| chr2 | 37363800 | 37373828 | 10029  | 2  | 4 | 1 | 0.01077081 | 0.30102999 | 9  | 0 | 1.01542894 | 0          |
| chr2 | 37373828 | 37573211 | 199384 | 9  | 4 | 1 | 0.00530919 | 0.30102999 | 10 | 0 | 1.25861299 | 0          |
| chr2 | 37573211 | 37754609 | 181399 | 6  | 3 | 1 | 0.00170589 | 0.30102999 | 10 | 0 | 1.61091002 | 0          |
| chr2 | 37754609 | 37754667 | 59     | 1  | 5 | 1 | 0.01320236 | 0.30102999 | 10 | 0 | 0.97390707 | 0          |
| chr2 | 37754667 | 37886565 | 131899 | 2  | 4 | 1 | 0.00530919 | 0.30102999 | 10 | 0 | 1.25861299 | 0          |
| chr2 | 37886565 | 37886624 | 60     | 1  | 5 | 1 | 0.00666883 | 0.30102999 | 11 | 0 | 1.20557689 | 0          |
| chr2 | 37886624 | 37936435 | 49812  | 3  | 4 | 1 | 0.00247414 | 0.30102999 | 11 | 0 | 1.52371709 | 0          |
| chr2 | 37936435 | 37936494 | 60     | 1  | 5 |   |            |            |    |   |            |            |

|      |          |          |         |    |   |   |            |            |   |   |            |            |
|------|----------|----------|---------|----|---|---|------------|------------|---|---|------------|------------|
| chr2 | 40272159 | 40487057 | 214899  | 7  | 2 | 1 | 0.02162467 | 0.30102999 | 5 | 0 | 0.68214471 | 0          |
| chr2 | 40487057 | 40511988 | 24932   | 2  | 2 | 2 | 0.02162467 | 0.61140001 | 5 | 0 | 0.68214471 | 0          |
| chr2 | 40511988 | 40619683 | 107696  | 2  | 2 | 1 | 0.02162467 | 0.30102999 | 5 | 0 | 0.68214471 | 0          |
| chr2 | 40619683 | 40619742 | 60      | 1  | 2 | 2 | 0.02162467 | 0.61140001 | 5 | 0 | 0.68214471 | 0          |
| chr2 | 40619742 | 40805135 | 185394  | 4  | 2 | 1 | 0.02162467 | 0.30102999 | 5 | 0 | 0.68214471 | 0          |
| chr2 | 40805135 | 41112480 | 307346  | 7  | 2 | 2 | 0.02162467 | 0.61140001 | 5 | 0 | 0.68214471 | 0          |
| chr2 | 41112480 | 41290191 | 177712  | 5  | 2 | 2 | 0.01053319 | 0.61140001 | 6 | 0 | 0.91219088 | 0          |
| chr2 | 41290191 | 41352334 | 62144   | 1  | 2 | 2 | 0.02162467 | 0.61140001 | 5 | 0 | 0.68214471 | 0          |
| chr2 | 41352334 | 41445536 | 93203   | 1  | 1 | 1 | 0.00478973 | 0.30102999 | 5 | 0 | 1.02643191 | 0          |
| chr2 | 41445536 | 41731170 | 285635  | 1  | 1 | 0 | 0.00478973 | 0          | 5 | 0 | 1.02643191 | 0          |
| chr2 | 41731170 | 41731229 | 60      | 1  | 2 | 0 | 0.01053319 | 0          | 6 | 0 | 0.91219088 | 0          |
| chr2 | 41731229 | 42108746 | 377518  | 4  | 1 | 0 | 0.00478973 | 0          | 5 | 0 | 1.02643191 | 0          |
| chr2 | 42108746 | 42738358 | 629613  | 14 | 2 | 0 | 0.02162467 | 0          | 5 | 0 | 0.68214471 | 0          |
| chr2 | 42738358 | 42797410 | 59053   | 1  | 2 | 0 | 0.0429175  | 0          | 4 | 0 | 0.47744371 | 0          |
| chr2 | 42797410 | 42862369 | 64960   | 2  | 2 | 0 | 0.02162467 | 0          | 5 | 0 | 0.68214471 | 0          |
| chr2 | 42862369 | 42995542 | 133174  | 4  | 2 | 0 | 0.01053319 | 0          | 6 | 0 | 0.91219088 | 0          |
| chr2 | 42995542 | 42995597 | 56      | 1  | 2 | 1 | 0.01053319 | 0.30102999 | 6 | 0 | 0.91219088 | 0          |
| chr2 | 42995597 | 43142825 | 147229  | 3  | 2 | 0 | 0.02162467 | 0          | 5 | 0 | 0.68214471 | 0          |
| chr2 | 43142825 | 43230099 | 87275   | 2  | 3 | 0 | 0.05670724 | 0          | 5 | 0 | 0.45545077 | 0          |
| chr2 | 43230099 | 43267660 | 37562   | 2  | 2 | 0 | 0.03070643 | 0          | 6 | 0 | 0.63695542 | 0          |
| chr2 | 43267660 | 43265164 | 35705   | 6  | 3 | 0 | 0.05670724 | 0          | 5 | 0 | 0.45545077 | 0          |
| chr2 | 43265164 | 43739885 | 158722  | 5  | 3 | 0 | 0.03070643 | 0          | 6 | 0 | 0.63695542 | 0          |
| chr2 | 43739885 | 44071113 | 277229  | 8  | 3 | 1 | 0.03070643 | 0.30102999 | 6 | 0 | 0.63695542 | 0          |
| chr2 | 44071113 | 44418154 | 347042  | 8  | 3 | 0 | 0.05670724 | 0          | 5 | 0 | 0.45545077 | 0          |
| chr2 | 44418154 | 44507974 | 89821   | 4  | 3 | 0 | 0.03070643 | 0          | 6 | 0 | 0.63695542 | 0          |
| chr2 | 44507974 | 44625405 | 117432  | 3  | 2 | 0 | 0.01053319 | 0          | 6 | 0 | 0.91219088 | 0          |
| chr2 | 44625405 | 44657296 | 31892   | 2  | 3 | 0 | 0.03070643 | 0          | 6 | 0 | 0.63695542 | 0          |
| chr2 | 44657296 | 44657355 | 60      | 1  | 3 | 0 | 0.01598258 | 0          | 7 | 0 | 0.84395715 | 0          |
| chr2 | 44657355 | 44689098 | 31744   | 2  | 3 | 0 | 0.03070643 | 0          | 6 | 0 | 0.63695542 | 0          |
| chr2 | 44689098 | 44934622 | 245525  | 6  | 3 | 0 | 0.01598258 | 0          | 7 | 0 | 0.84395715 | 0          |
| chr2 | 44934622 | 44993698 | 59077   | 1  | 2 | 0 | 0.00493743 | 0          | 7 | 0 | 1.16581773 | 0          |
| chr2 | 44993698 | 45394752 | 401055  | 4  | 2 | 0 | 0.01053319 | 0          | 6 | 0 | 0.91219088 | 0          |
| chr2 | 45394752 | 45394811 | 60      | 1  | 2 | 0 | 0.00221948 | 0          | 8 | 0 | 1.44210395 | 0          |
| chr2 | 45394811 | 45616537 | 221727  | 2  | 1 | 0 | 8.47E-04   | 0          | 7 | 0 | 1.62048027 | 0          |
| chr2 | 45616537 | 45645486 | 28950   | 2  | 3 | 0 | 0.01598258 | 0          | 7 | 0 | 0.84395715 | 0          |
| chr2 | 45645486 | 45686868 | 41383   | 2  | 4 | 0 | 0.03812622 | 0          | 7 | 0 | 0.60763643 | 0          |
| chr2 | 45686868 | 45822610 | 135743  | 3  | 3 | 0 | 0.01598258 | 0          | 7 | 0 | 0.84395715 | 0          |
| chr2 | 45822610 | 45909120 | 86511   | 2  | 2 | 0 | 0.00493743 | 0          | 7 | 0 | 1.16581773 | 0          |
| chr2 | 45909120 | 45961523 | 52404   | 2  | 3 | 0 | 0.01598258 | 0          | 7 | 0 | 0.84395715 | 0          |
| chr2 | 45961523 | 45961582 | 60      | 1  | 4 | 0 | 0.03812622 | 0          | 7 | 0 | 0.60763643 | 0          |
| chr2 | 45961582 | 46070182 | 108601  | 2  | 3 | 0 | 0.01598258 | 0          | 7 | 0 | 0.84395715 | 0          |
| chr2 | 46070182 | 46156868 | 86687   | 2  | 2 | 0 | 0.00493743 | 0          | 7 | 0 | 1.16581773 | 0          |
| chr2 | 46156868 | 46234572 | 77705   | 3  | 3 | 0 | 0.01598258 | 0          | 7 | 0 | 0.84395715 | 0          |
| chr2 | 46234572 | 46413569 | 178998  | 6  | 4 | 0 | 0.03812622 | 0          | 7 | 0 | 0.60763643 | 0          |
| chr2 | 46413569 | 46549532 | 135964  | 2  | 3 | 0 | 0.01598258 | 0          | 7 | 0 | 0.84395715 | 0          |
| chr2 | 46549532 | 46670180 | 120649  | 2  | 2 | 0 | 0.00493743 | 0          | 7 | 0 | 1.16581773 | 0          |
| chr2 | 46670180 | 46739090 | 68911   | 2  | 3 | 0 | 0.01598258 | 0          | 7 | 0 | 0.84395715 | 0          |
| chr2 | 46739090 | 46847224 | 108135  | 7  | 3 | 1 | 0.01598258 | 0.30102999 | 7 | 0 | 0.84395715 | 0          |
| chr2 | 46847224 | 46852188 | 4965    | 2  | 4 | 1 | 0.03812622 | 0.30102999 | 7 | 0 | 0.60763643 | 0          |
| chr2 | 46852188 | 46959918 | 107731  | 3  | 1 | 1 | 8.47E-04   | 0.30102999 | 7 | 0 | 1.62048027 | 0          |
| chr2 | 46959918 | 46959977 | 60      | 1  | 3 | 1 | 0.01598258 | 0.30102999 | 7 | 0 | 0.84395715 | 0          |
| chr2 | 46959977 | 47129729 | 169753  | 2  | 1 | 1 | 8.47E-04   | 0.30102999 | 7 | 0 | 1.62048027 | 0          |
| chr2 | 47129729 | 47719669 | 642241  | 17 | 2 | 1 | 0.00493743 | 0.30102999 | 7 | 0 | 1.16581773 | 0          |
| chr2 | 47719669 | 47772028 | 60      | 1  | 3 | 1 | 0.0079614  | 0.30102999 | 8 | 0 | 1.07548421 | 0          |
| chr2 | 47772028 | 47938187 | 166160  | 3  | 2 | 1 | 0.00221948 | 0.30102999 | 8 | 0 | 1.44210395 | 0          |
| chr2 | 47938187 | 48012926 | 74740   | 1  | 2 | 0 | 0.00221948 | 0          | 8 | 0 | 1.44210395 | 0          |
| chr2 | 48012926 | 48032122 | 19197   | 2  | 2 | 0 | 0.00493743 | 0          | 7 | 0 | 1.16581773 | 0          |
| chr2 | 48032122 | 48085000 | 52879   | 2  | 2 | 0 | 0.00221948 | 0          | 8 | 0 | 1.44210395 | 0          |
| chr2 | 48085000 | 48116010 | 31011   | 2  | 1 | 1 | 0.00221948 | 0.30102999 | 7 | 0 | 1.44210395 | 0          |
| chr2 | 48116010 | 48155501 | 39492   | 1  | 2 | 0 | 0.00493743 | 0          | 7 | 0 | 1.16581773 | 0          |
| chr2 | 48155501 | 48244418 | 88918   | 2  | 3 | 0 | 0.01598258 | 0          | 7 | 0 | 0.84395715 | 0          |
| chr2 | 48244418 | 48366589 | 122172  | 3  | 3 | 0 | 0.0079614  | 0          | 8 | 0 | 1.07548421 | 0          |
| chr2 | 48366589 | 48592466 | 225878  | 4  | 2 | 0 | 0.00221948 | 0          | 8 | 0 | 1.44210395 | 0          |
| chr2 | 48592466 | 48592525 | 60      | 1  | 3 | 0 | 0.0079614  | 0          | 8 | 0 | 1.07548421 | 0          |
| chr2 | 48592525 | 48737116 | 144592  | 5  | 2 | 0 | 0.00221948 | 0          | 8 | 0 | 1.44210395 | 0          |
| chr2 | 48737116 | 49051274 | 314159  | 8  | 2 | 0 | 0.00493743 | 0          | 7 | 0 | 1.16581773 | 0          |
| chr2 | 49051274 | 49208081 | 156808  | 3  | 2 | 0 | 0.01053319 | 0          | 6 | 0 | 0.91219088 | 0          |
| chr2 | 49208081 | 49402636 | 194556  | 5  | 2 | 0 | 0.00221948 | 0          | 8 | 0 | 1.44210395 | 0          |
| chr2 | 49402636 | 49484686 | 82051   | 3  | 2 | 0 | 0.0079614  | 0          | 8 | 0 | 1.07548421 | 0          |
| chr2 | 49484686 | 49484745 | 60      | 1  | 5 | 0 | 0.04407651 | 0          | 8 | 0 | 0.58747015 | 0          |
| chr2 | 49484745 | 49804254 | 319510  | 2  | 4 | 0 | 0.02074938 | 0          | 8 | 0 | 0.79906872 | 0          |
| chr2 | 49804254 | 49804313 | 60      | 1  | 5 | 0 | 0.04407651 | 0          | 8 | 0 | 0.58747015 | 0          |
| chr2 | 49804313 | 50148852 | 344540  | 3  | 5 | 0 | 0.07511598 | 0          | 7 | 0 | 0.43181735 | 0          |
| chr2 | 50148852 | 50240188 | 91337   | 2  | 4 | 0 | 0.03812622 | 0          | 7 | 0 | 0.60763643 | 0          |
| chr2 | 50240188 | 50240247 | 60      | 1  | 4 | 1 | 0.03812622 | 0.30102999 | 7 | 0 | 0.60763643 | 0          |
| chr2 | 50240247 | 50393957 | 153711  | 3  | 4 | 0 | 0.03812622 | 0          | 7 | 0 | 0.60763643 | 0          |
| chr2 | 50393957 | 51446814 | 1052858 | 22 | 4 | 1 | 0.03812622 | 0.30102999 | 7 | 0 | 0.60763643 | 0          |
| chr2 | 51446814 | 51702007 | 255194  | 5  | 4 | 1 | 0.03812622 | 0.1218695  | 7 | 1 | 0.60763643 | 0.1218695  |
| chr2 | 51702007 | 51739098 | 37092   | 1  | 4 | 1 | 0.06713722 | 0.30102999 | 6 | 0 | 0.44141547 | 0          |
| chr2 | 51739098 | 51846950 | 107853  | 2  | 4 | 0 | 0.06713722 | 0          | 6 | 0 | 0.44141547 | 0          |
| chr2 | 51846950 | 51847009 | 60      | 1  | 4 | 1 | 0.06713722 | 0.30102999 | 6 | 0 | 0.44141547 | 0          |
| chr2 | 51847009 | 52185474 | 338466  | 5  | 4 | 0 | 0.06713722 | 0          | 6 | 0 | 0.44141547 | 0          |
| chr2 | 52185474 | 52434693 | 249220  | 3  | 4 | 0 | 0.1139036  | 0          | 5 | 0 | 0.30102999 | 0          |
| chr2 | 52434693 | 53031053 | 596361  | 7  | 3 | 0 | 0.05670724 | 0          | 5 | 0 | 0.45545077 | 0          |
| chr2 | 53031053 | 53107069 | 76017   | 2  | 3 | 0 | 0.03070643 | 0          | 6 | 0 | 0.63695542 | 0          |
| chr2 | 53107069 | 53747584 | 640516  | 6  | 2 | 0 | 0.01053319 | 0          | 6 | 0 | 0.91219088 | 0          |
| chr2 | 53747584 | 53800287 | 52704   | 2  | 2 | 0 | 0.02162467 | 0          | 5 | 0 | 0.68214471 | 0          |
| chr2 | 53800287 | 53869591 | 69305   | 2  | 3 | 0 | 0.05670724 | 0          | 5 | 0 | 0.45545077 | 0          |
| chr2 | 53869591 | 53869650 | 60      | 1  | 3 | 0 | 0.03070643 | 0          | 6 | 1 | 0.63695542 | 0.30102999 |
| chr2 | 53869650 | 54360764 | 491115  | 13 | 3 | 0 | 0.03070643 | 0          | 6 | 0 | 0.63695542 | 0          |
| chr2 | 54360764 | 54360823 | 60      | 1  | 4 | 0 | 0.06713722 | 0          | 6 | 0 | 0.44141547 | 0          |
| chr2 | 54360823 | 5453210  | 92388   | 2  | 4 | 0 | 0.1139036  | 0          | 5 | 0 | 0.30102999 | 0          |
| chr2 | 5453210  | 5453269  | 60      | 1  | 4 | 0 | 0.06713722 | 0          | 6 | 1 | 0.44141547 | 0.30102999 |
| chr2 | 5453269  | 54531800 | 78532   | 1  | 4 | 0 | 0.06713722 | 0          | 6 | 0 | 0.44141547 | 0          |
| chr2 | 54531800 | 54595080 | 63281   | 3  | 4 | 0 | 0.03812622 | 0          | 7 | 0 | 0.60763643 | 0          |
| chr2 | 54595080 | 54595139 | 60      | 1  | 4 | 0 | 0.02074938 | 0          | 8 | 0 | 0.79906872 | 0          |
| chr2 | 54595139 | 54755314 | 160176  | 3  | 4 | 0 | 0.03812622 | 0          | 7 | 0 | 0.60763643 | 0          |
| chr2 | 54755314 | 54755951 | 638     | 2  | 4 | 0 | 0.02074938 | 0          | 8 | 0 | 0.79906872 | 0          |
| chr2 | 54755951 | 54786608 | 30658   | 1  | 4 | 0 | 0.03812622 | 0          | 7 | 0 | 0.60763643 | 0          |
| chr2 | 54786608 | 54893075 | 106468  | 2  | 3 | 0 | 0.01598258 | 0          | 7 | 0 | 0.84395715 | 0          |
| chr2 | 54893075 | 54954387 | 61313   | 2  | 4 | 0 | 0.02074938 | 0          | 8 | 0 | 0.79906872 | 0          |

|      |          |          |        |    |   |   |            |            |   |   |            |   |
|------|----------|----------|--------|----|---|---|------------|------------|---|---|------------|---|
| chr2 | 57906726 | 58275967 | 369242 | 5  | 2 | 0 | 0.02162467 | 0          | 5 | 0 | 0.68214471 | 0 |
| chr2 | 58275967 | 58468777 | 192811 | 6  | 3 | 1 | 0.03070643 | 0.30102999 | 6 | 0 | 0.63695542 | 0 |
| chr2 | 58468777 | 58566616 | 97840  | 1  | 3 | 0 | 0.05670724 | 0.30102999 | 5 | 0 | 0.45545077 | 0 |
| chr2 | 58566616 | 58669495 | 102880 | 2  | 4 | 1 | 0.11390336 | 0.30102999 | 5 | 0 | 0.30102999 | 0 |
| chr2 | 58669495 | 58669554 | 60     | 1  | 5 | 1 | 0.12309572 | 0.30102999 | 6 | 0 | 0.30102999 | 0 |
| chr2 | 58669554 | 58803133 | 133580 | 2  | 5 | 1 | 0.19510895 | 0.30102999 | 5 | 0 | 0.19510895 | 0 |
| chr2 | 58803133 | 58858910 | 55778  | 1  | 5 | 0 | 0.19510895 | 0          | 5 | 0 | 0.19510895 | 0 |
| chr2 | 58858910 | 58858969 | 60     | 1  | 6 | 0 | 0.129913   | 0          | 7 | 0 | 0.30102999 | 0 |
| chr2 | 58858969 | 58957602 | 98634  | 1  | 5 | 0 | 0.07511598 | 0          | 7 | 0 | 0.43181735 | 0 |
| chr2 | 58957602 | 59178774 | 221173 | 2  | 5 | 0 | 0.12309572 | 0          | 6 | 0 | 0.30102999 | 0 |
| chr2 | 59178774 | 59274583 | 95810  | 2  | 5 | 0 | 0.07511598 | 0          | 7 | 0 | 0.43181735 | 0 |
| chr2 | 59274583 | 59274642 | 60     | 1  | 5 | 0 | 0.04407651 | 0          | 8 | 0 | 0.58747015 | 0 |
| chr2 | 59274642 | 59497510 | 222869 | 3  | 4 | 0 | 0.18734596 | 0          | 4 | 0 | 0.18734596 | 0 |
| chr2 | 59497510 | 59749446 | 251937 | 2  | 3 | 0 | 0.17593012 | 0          | 3 | 0 | 0.17593012 | 0 |
| chr2 | 59749446 | 60013464 | 264019 | 4  | 4 | 0 | 0.18734596 | 0          | 4 | 0 | 0.18734596 | 0 |
| chr2 | 60013464 | 60185767 | 172304 | 2  | 4 | 0 | 0.11390336 | 0          | 5 | 0 | 0.30102999 | 0 |
| chr2 | 60185767 | 60294104 | 108338 | 2  | 4 | 0 | 0.06713722 | 0          | 6 | 0 | 0.44141547 | 0 |
| chr2 | 60294104 | 60294163 | 60     | 1  | 4 | 1 | 0.06713722 | 0.30102999 | 6 | 0 | 0.44141547 | 0 |
| chr2 | 60294163 | 60381835 | 87673  | 1  | 4 | 1 | 0.11390336 | 0.30102999 | 5 | 0 | 0.30102999 | 0 |
| chr2 | 60381835 | 60488034 | 106200 | 2  | 4 | 1 | 0.06713722 | 0.30102999 | 6 | 0 | 0.44141547 | 0 |
| chr2 | 60488034 | 60488093 | 60     | 1  | 4 | 0 | 0.07511598 | 0.30102999 | 7 | 0 | 0.43181735 | 0 |
| chr2 | 60488093 | 60676037 | 187945 | 2  | 4 | 1 | 0.06713722 | 0.30102999 | 6 | 0 | 0.44141547 | 0 |
| chr2 | 60676037 | 60676096 | 60     | 1  | 4 | 1 | 0.03812622 | 0.30102999 | 7 | 0 | 0.60763643 | 0 |
| chr2 | 60676096 | 61149560 | 473465 | 12 | 4 | 1 | 0.06713722 | 0.30102999 | 6 | 0 | 0.44141547 | 0 |
| chr2 | 61149560 | 61618758 | 469199 | 13 | 4 | 1 | 0.03812622 | 0.30102999 | 7 | 0 | 0.60763643 | 0 |
| chr2 | 61618758 | 61684571 | 65814  | 1  | 4 | 1 | 0.06713722 | 0.30102999 | 6 | 0 | 0.44141547 | 0 |
| chr2 | 61684571 | 61742573 | 58003  | 2  | 4 | 0 | 0.06713722 | 0          | 6 | 0 | 0.44141547 | 0 |
| chr2 | 61742573 | 61742632 | 60     | 1  | 5 | 1 | 0.12309572 | 0.30102999 | 6 | 0 | 0.30102999 | 0 |
| chr2 | 61742632 | 61848845 | 106214 | 2  | 4 | 1 | 0.06713722 | 0.30102999 | 6 | 0 | 0.44141547 | 0 |
| chr2 | 61848845 | 61952880 | 104036 | 1  | 3 | 0 | 0.03070643 | 0          | 6 | 0 | 0.63695542 | 0 |
| chr2 | 61952880 | 62405706 | 452827 | 10 | 3 | 0 | 0.01598258 | 0          | 7 | 0 | 0.84395715 | 0 |
| chr2 | 62405706 | 62481591 | 75886  | 3  | 0 | 0 | 0.03070643 | 0          | 6 | 0 | 0.63695542 | 0 |
| chr2 | 62481591 | 62605999 | 124409 | 2  | 3 | 1 | 0.03070643 | 0.30102999 | 6 | 0 | 0.63695542 | 0 |
| chr2 | 62605999 | 62727947 | 121949 | 2  | 3 | 1 | 0.01598258 | 0.30102999 | 7 | 0 | 0.84395715 | 0 |
| chr2 | 62727947 | 62775202 | 47256  | 2  | 3 | 1 | 0.03070643 | 0.30102999 | 6 | 0 | 0.63695542 | 0 |
| chr2 | 62775202 | 63140968 | 365767 | 8  | 3 | 1 | 0.01598258 | 0.30102999 | 7 | 0 | 0.84395715 | 0 |
| chr2 | 63140968 | 63380102 | 239135 | 7  | 3 | 1 | 0.00378107 | 0.30102999 | 9 | 0 | 1.3311237  | 0 |
| chr2 | 63380102 | 63448572 | 68471  | 1  | 3 | 0 | 0.0079614  | 0          | 8 | 0 | 1.07548421 | 0 |
| chr2 | 63448572 | 63448631 | 60     | 1  | 3 | 0 | 0.00378107 | 0          | 9 | 0 | 1.3311237  | 0 |
| chr2 | 63448631 | 63646819 | 198189 | 5  | 3 | 0 | 0.0079614  | 0          | 8 | 0 | 1.07548421 | 0 |
| chr2 | 63646819 | 63646878 | 60     | 1  | 3 | 0 | 0.00378107 | 0          | 9 | 0 | 1.3311237  | 0 |
| chr2 | 63646878 | 63742573 | 95696  | 2  | 3 | 0 | 0.0079614  | 0          | 8 | 0 | 1.07548421 | 0 |
| chr2 | 63742573 | 63816969 | 74397  | 2  | 3 | 0 | 0.00378107 | 0          | 9 | 0 | 1.3311237  | 0 |
| chr2 | 63816969 | 63885258 | 68290  | 2  | 4 | 0 | 0.01077081 | 0          | 9 | 0 | 1.01542894 | 0 |
| chr2 | 63885258 | 63921668 | 36411  | 2  | 5 | 1 | 0.02473314 | 0.30102999 | 9 | 0 | 0.76806864 | 0 |
| chr2 | 63921668 | 64102682 | 181015 | 2  | 5 | 0 | 0.04407651 | 0          | 8 | 0 | 0.58747015 | 0 |
| chr2 | 64102682 | 64141004 | 38323  | 3  | 5 | 0 | 0.02473314 | 0          | 9 | 0 | 0.76806864 | 0 |
| chr2 | 64141004 | 64245660 | 104657 | 2  | 4 | 0 | 0.02074938 | 0          | 8 | 0 | 0.79906872 | 0 |
| chr2 | 64245660 | 64245716 | 57     | 1  | 4 | 0 | 0.01077081 | 0          | 9 | 0 | 1.01542894 | 0 |
| chr2 | 64245716 | 64323624 | 77909  | 1  | 4 | 0 | 0.02074938 | 0          | 8 | 0 | 0.79906872 | 0 |
| chr2 | 64323624 | 64633979 | 310356 | 4  | 4 | 0 | 0.03812622 | 0          | 7 | 0 | 0.60763643 | 0 |
| chr2 | 64633979 | 64683562 | 49584  | 2  | 4 | 0 | 0.01077081 | 0          | 9 | 0 | 1.01542894 | 0 |
| chr2 | 64683562 | 65142743 | 459182 | 7  | 4 | 0 | 0.02074938 | 0          | 8 | 0 | 0.79906872 | 0 |
| chr2 | 65142743 | 65348811 | 206069 | 5  | 4 | 0 | 0.00221948 | 0          | 8 | 0 | 1.44210395 | 0 |
| chr2 | 65348811 | 65348870 | 60     | 1  | 3 | 0 | 0.0079614  | 0          | 8 | 0 | 1.07548421 | 0 |
| chr2 | 65348870 | 65523986 | 175117 | 5  | 3 | 0 | 0.01598258 | 0          | 7 | 0 | 0.84395715 | 0 |
| chr2 | 65523986 | 65688972 | 164987 | 4  | 2 | 0 | 0.01053319 | 0          | 6 | 0 | 0.91219088 | 0 |
| chr2 | 65688972 | 65731798 | 42827  | 2  | 2 | 0 | 0.00493743 | 0          | 7 | 0 | 1.16581773 | 0 |
| chr2 | 65731798 | 66056391 | 324594 | 6  | 2 | 0 | 0.01053319 | 0          | 6 | 0 | 0.91219088 | 0 |
| chr2 | 66056391 | 66171444 | 115054 | 1  | 2 | 0 | 0.02162467 | 0          | 5 | 0 | 0.68214471 | 0 |
| chr2 | 66171444 | 66258676 | 87233  | 2  | 2 | 0 | 0.01053319 | 0          | 6 | 0 | 0.91219088 | 0 |
| chr2 | 66258676 | 66258735 | 60     | 1  | 3 | 0 | 0.03070643 | 0          | 6 | 0 | 0.63695542 | 0 |
| chr2 | 66258735 | 66353450 | 94716  | 1  | 1 | 0 | 0.00204627 | 0          | 6 | 0 | 1.31360226 | 0 |
| chr2 | 66353450 | 66484262 | 130813 | 1  | 1 | 0 | 0.00478973 | 0          | 5 | 0 | 1.02643191 | 0 |
| chr2 | 66484262 | 66484321 | 60     | 1  | 0 | 0 | 0.02162467 | 0          | 5 | 0 | 0.68214471 | 0 |
| chr2 | 66484321 | 66973843 | 488523 | 6  | 1 | 0 | 0.00478973 | 0          | 5 | 0 | 1.02643191 | 0 |
| chr2 | 66973843 | 67473825 | 500983 | 4  | 1 | 0 | 0.01051641 | 0          | 4 | 0 | 0.76005302 | 0 |
| chr2 | 67473825 | 67566920 | 93096  | 1  | 1 | 0 | 0.00478973 | 0          | 5 | 0 | 1.02643191 | 0 |
| chr2 | 67566920 | 67566979 | 60     | 1  | 1 | 0 | 0.00204627 | 0          | 6 | 0 | 1.31360226 | 0 |
| chr2 | 67566979 | 67828842 | 261864 | 4  | 1 | 0 | 0.01091641 | 0          | 4 | 0 | 0.76005302 | 0 |
| chr2 | 67828842 | 68385638 | 556797 | 9  | 1 | 0 | 0.00478973 | 0          | 5 | 0 | 1.02643191 | 0 |
| chr2 | 68385638 | 68412899 | 27262  | 1  | 1 | 0 | 0.01091641 | 0          | 4 | 0 | 0.76005302 | 0 |
| chr2 | 68412899 | 68464760 | 51862  | 2  | 1 | 0 | 0.00478973 | 0          | 5 | 0 | 1.02643191 | 0 |
| chr2 | 68464760 | 68701748 | 236989 | 6  | 1 | 0 | 0.00204627 | 0          | 6 | 0 | 1.31360226 | 0 |
| chr2 | 68701748 | 68701807 | 60     | 1  | 2 | 0 | 0.01053319 | 0          | 6 | 0 | 0.91219088 | 0 |
| chr2 | 68701807 | 68758519 | 56713  | 2  | 1 | 0 | 0.00204627 | 0          | 6 | 0 | 1.31360226 | 0 |
| chr2 | 68758519 | 68813947 | 55429  | 2  | 0 | 0 | 0.01053319 | 0          | 6 | 0 | 0.91219088 | 0 |
| chr2 | 68813947 | 69029193 | 215247 | 6  | 3 | 0 | 0.03070643 | 0          | 6 | 0 | 0.63695542 | 0 |
| chr2 | 69029193 | 69095331 | 66139  | 1  | 3 | 0 | 0.05670724 | 0          | 5 | 0 | 0.45545077 | 0 |
| chr2 | 69095331 | 69342450 | 247120 | 6  | 3 | 1 | 0.05670724 | 0.30102999 | 5 | 0 | 0.45545077 | 0 |
| chr2 | 69342450 | 69399604 | 57155  | 1  | 2 | 1 | 0.0429175  | 0.30102999 | 4 | 0 | 0.47744371 | 0 |
| chr2 | 69399604 | 69447536 | 47933  | 1  | 2 | 0 | 0.0429175  | 0          | 4 | 0 | 0.47744371 | 0 |
| chr2 | 69447536 | 69473533 | 25998  | 2  | 3 | 0 | 0.01122019 | 0          | 4 | 0 | 0.30102999 | 0 |
| chr2 | 69473533 | 69642021 | 168489 | 3  | 2 | 0 | 0.0429175  | 0          | 4 | 0 | 0.47744371 | 0 |
| chr2 | 69642021 | 69642080 | 60     | 1  | 3 | 0 | 0.05670724 | 0          | 5 | 0 | 0.45545077 | 0 |
| chr2 | 69642080 | 69732684 | 90605  | 2  | 2 | 0 | 0.02162467 | 0          | 5 | 0 | 0.68214471 | 0 |
| chr2 | 69732684 | 69901895 | 169212 | 5  | 2 | 2 | 0.02162467 | 0.61140001 | 5 | 0 | 0.68214471 | 0 |
| chr2 | 69901895 | 6998713  | 96819  | 3  | 2 | 2 | 0.05670724 | 0.61140001 | 5 | 0 | 0.45545077 | 0 |
| chr2 | 6998713  | 70053063 | 54351  | 3  | 4 | 2 | 0.11390336 | 0.61140001 | 5 | 0 | 0.30102999 | 0 |
| chr2 | 70053063 | 70053122 | 60     | 1  | 4 | 2 | 0.06713722 | 0.61140001 | 6 | 0 | 0.44141547 | 0 |
| chr2 | 70053122 | 70187221 | 134100 | 7  | 4 | 1 | 0.11390336 | 0.30102999 | 5 | 0 | 0.30102999 | 0 |
| chr2 | 70187221 | 70188253 | 1033   | 2  | 4 | 2 | 0.11390336 | 0.61140001 | 5 | 0 | 0.30102999 | 0 |
| chr2 | 70188253 | 70298339 | 110087 | 1  | 4 | 1 | 0.11390336 | 0.30102999 | 5 | 0 | 0.30102999 | 0 |
| chr2 | 70298339 | 70409868 | 111530 | 3  | 4 | 1 | 0.06713722 | 0.30102999 | 6 | 0 | 0.44141547 | 0 |
| chr2 | 70409868 | 70409927 | 60     | 1  | 4 | 2 | 0.06713722 | 0.61140001 | 6 | 0 | 0.44141547 | 0 |
| chr2 | 70409927 | 70451740 | 41814  | 2  | 2 | 0 | 0.03070643 | 0.61140001 | 6 | 0 | 0.63695542 | 0 |
| chr2 | 70451740 | 70604585 | 152846 | 5  | 3 | 2 | 0.05670724 | 0.61140001 | 5 | 0 | 0.45545077 | 0 |
| chr2 | 70604585 | 70604644 | 60     | 1  | 4 | 2 | 0.06713722 | 0.61140001 | 6 | 0 | 0.44141547 | 0 |
| chr2 | 70604644 | 70704310 | 99667  | 2  | 4 | 1 | 0.06713722 | 0.30102999 | 6 | 0 | 0.44141547 | 0 |
| chr2 | 70704310 | 70984721 | 280412 | 6  | 3 | 1 | 0.03070643 | 0.30102999 | 6 | 0 | 0.63695542 | 0 |
| chr2 | 70984721 | 7098     |        |    |   |   |            |            |   |   |            |   |



|      |          |          |        |    |   |   |            |            |   |   |            |            |
|------|----------|----------|--------|----|---|---|------------|------------|---|---|------------|------------|
| chr2 | 73118147 | 73118206 | 60     | 1  | 3 | 0 | 0.17593012 | 0          | 3 | 1 | 0.17593012 | 0.30102999 |
| chr2 | 73118206 | 73153830 | 35625  | 1  | 3 | 0 | 0.17593012 | 0          | 3 | 0 | 0.17593012 | 0          |
| chr2 | 73153830 | 73153889 | 60     | 1  | 4 | 0 | 0.18734596 | 0          | 4 | 0 | 0.18734596 | 0          |
| chr2 | 73153889 | 73211161 | 57273  | 1  | 3 | 0 | 0.10122019 | 0          | 4 | 0 | 0.30102999 | 0          |
| chr2 | 73211161 | 73265071 | 53911  | 2  | 4 | 0 | 0.18734596 | 0          | 4 | 0 | 0.18734596 | 0          |
| chr2 | 73265071 | 73316307 | 51237  | 3  | 4 | 0 | 0.18734596 | 0          | 4 | 1 | 0.18734596 | 0.30102999 |
| chr2 | 73316307 | 73336374 | 20068  | 1  | 3 | 0 | 0.17593012 | 0          | 3 | 1 | 0.17593012 | 0.30102999 |
| chr2 | 73336374 | 73400870 | 64497  | 1  | 2 | 0 | 0.08289318 | 0          | 3 | 1 | 0.30102999 | 0.30102999 |
| chr2 | 73400870 | 73400929 | 60     | 1  | 2 | 0 | 0.0429175  | 0          | 4 | 1 | 0.47744371 | 0.30102999 |
| chr2 | 73400929 | 73459121 | 58193  | 1  | 2 | 0 | 0.08289318 | 0          | 3 | 1 | 0.30102999 | 0.30102999 |
| chr2 | 73459121 | 73518150 | 59030  | 3  | 4 | 0 | 0.30102999 | 0          | 3 | 1 | 0.10122019 | 0.30102999 |
| chr2 | 73518150 | 73602944 | 84795  | 1  | 3 | 0 | 0.17593012 | 0          | 3 | 0 | 0.17593012 | 0          |
| chr2 | 73602944 | 73642073 | 39130  | 2  | 4 | 0 | 0.30102999 | 0          | 3 | 0 | 0.10122019 | 0          |
| chr2 | 73642073 | 73675234 | 33162  | 1  | 3 | 0 | 0.17593012 | 0          | 3 | 0 | 0.17593012 | 0          |
| chr2 | 73675234 | 73675293 | 60     | 1  | 3 | 0 | 0.17593012 | 0          | 3 | 1 | 0.17593012 | 0.30102999 |
| chr2 | 73675293 | 73718381 | 43089  | 1  | 3 | 0 | 0.17593012 | 0          | 3 | 0 | 0.17593012 | 0          |
| chr2 | 73718381 | 73718440 | 60     | 1  | 5 | 0 | 0.45545077 | 0          | 3 | 0 | 0.05670724 | 0          |
| chr2 | 73718440 | 73879011 | 160572 | 4  | 5 | 0 | 0.68214471 | 0          | 2 | 0 | 0.02162467 | 0          |
| chr2 | 73879011 | 73957150 | 78140  | 2  | 6 | 0 | 0.63695542 | 0          | 3 | 0 | 0.03070643 | 0          |
| chr2 | 73957150 | 73989419 | 32270  | 1  | 5 | 0 | 0.45545077 | 0          | 3 | 0 | 0.05670724 | 0          |
| chr2 | 73989419 | 74089750 | 100332 | 3  | 4 | 0 | 0.47744371 | 0          | 2 | 0 | 0.0429175  | 0          |
| chr2 | 74089750 | 74089809 | 60     | 1  | 6 | 0 | 0.68214471 | 0          | 2 | 0 | 0.02162467 | 0          |
| chr2 | 74089809 | 74182101 | 92293  | 3  | 4 | 0 | 0.47744371 | 0          | 2 | 0 | 0.0429175  | 0          |
| chr2 | 74182101 | 74182160 | 60     | 1  | 5 | 0 | 0.68214471 | 0          | 2 | 0 | 0.02162467 | 0          |
| chr2 | 74182160 | 74320231 | 138072 | 2  | 4 | 0 | 0.47744371 | 0          | 2 | 0 | 0.0429175  | 0          |
| chr2 | 74320231 | 74362495 | 42265  | 3  | 4 | 1 | 0.47744371 | 0.30102999 | 2 | 0 | 0.0429175  | 0          |
| chr2 | 74362495 | 74834374 | 471880 | 27 | 3 | 1 | 0.30102999 | 0.30102999 | 2 | 0 | 0.08289318 | 0          |
| chr2 | 74834374 | 74998815 | 164442 | 2  | 1 | 1 | 0.1575501  | 0.30102999 | 2 | 0 | 0.1575501  | 0          |
| chr2 | 74998815 | 74998874 | 60     | 1  | 3 | 1 | 0.30102999 | 0.30102999 | 2 | 0 | 0.08289318 | 0          |
| chr2 | 74998874 | 75347744 | 348871 | 8  | 2 | 1 | 0.1575501  | 0.30102999 | 2 | 0 | 0.1575501  | 0          |
| chr2 | 75347744 | 75582299 | 234556 | 3  | 2 | 0 | 0.1575501  | 0          | 2 | 0 | 0.1575501  | 0          |
| chr2 | 75582299 | 75648767 | 66469  | 2  | 2 | 1 | 0.1575501  | 0.30102999 | 2 | 0 | 0.1575501  | 0          |
| chr2 | 75648767 | 75729632 | 80866  | 1  | 2 | 0 | 0.1575501  | 0          | 2 | 0 | 0.1575501  | 0          |
| chr2 | 75729632 | 75847471 | 117840 | 2  | 2 | 0 | 0.30102999 | 0          | 1 | 0 | 0.05404976 | 0          |
| chr2 | 75847471 | 76069645 | 222175 | 5  | 2 | 1 | 0.30102999 | 0.30102999 | 1 | 0 | 0.05404976 | 0          |
| chr2 | 76069645 | 76339564 | 269920 | 1  | 2 | 0 | 0.30102999 | 0          | 1 | 0 | 0.05404976 | 0          |
| chr2 | 76339564 | 76510135 | 170572 | 2  | 2 | 0 | 0.1575501  | 0          | 2 | 0 | 0.1575501  | 0          |
| chr2 | 76510135 | 76841649 | 331515 | 3  | 3 | 0 | 0.30102999 | 0          | 2 | 0 | 0.08289318 | 0          |
| chr2 | 76841649 | 76996090 | 154442 | 2  | 2 | 0 | 0.1575501  | 0          | 2 | 0 | 0.1575501  | 0          |
| chr2 | 76996090 | 7708163  | 712074 | 16 | 3 | 1 | 0.30102999 | 0.30102999 | 2 | 0 | 0.08289318 | 0          |
| chr2 | 7708163  | 7778862  | 80700  | 5  | 2 | 1 | 0.1575501  | 0.30102999 | 2 | 0 | 0.1575501  | 0          |
| chr2 | 7778862  | 77788921 | 60     | 1  | 4 | 1 | 0.47744371 | 0.30102999 | 2 | 0 | 0.0429175  | 0          |
| chr2 | 77788921 | 77883284 | 94364  | 1  | 3 | 1 | 0.30102999 | 0.30102999 | 2 | 0 | 0.08289318 | 0          |
| chr2 | 77883284 | 77946599 | 63316  | 1  | 2 | 1 | 0.1575501  | 0.30102999 | 2 | 0 | 0.1575501  | 0          |
| chr2 | 77946599 | 77946658 | 60     | 1  | 2 | 2 | 0.1575501  | 0.61140001 | 2 | 0 | 0.1575501  | 0          |
| chr2 | 77946658 | 78261806 | 315149 | 2  | 2 | 1 | 0.1575501  | 0.30102999 | 2 | 0 | 0.1575501  | 0          |
| chr2 | 78261806 | 78261865 | 60     | 1  | 2 | 2 | 0.1575501  | 0.61140001 | 2 | 0 | 0.1575501  | 0          |
| chr2 | 78261865 | 78495737 | 233873 | 3  | 2 | 1 | 0.1575501  | 0.30102999 | 2 | 0 | 0.1575501  | 0          |
| chr2 | 78495737 | 78680879 | 185143 | 2  | 1 | 1 | 0.05404976 | 0.30102999 | 2 | 0 | 0.30102999 | 0          |
| chr2 | 78680879 | 78680938 | 60     | 1  | 2 | 2 | 0.05404976 | 0.61140001 | 2 | 0 | 0.30102999 | 0          |
| chr2 | 78680938 | 78914816 | 233879 | 3  | 1 | 1 | 0.05404976 | 0.30102999 | 2 | 0 | 0.30102999 | 0          |
| chr2 | 78914816 | 79059451 | 144636 | 2  | 1 | 1 | 0.1575501  | 0.30102999 | 2 | 0 | 0.1575501  | 0          |
| chr2 | 79059451 | 79268615 | 209165 | 3  | 3 | 1 | 0.30102999 | 0.30102999 | 2 | 0 | 0.08289318 | 0          |
| chr2 | 79268615 | 79312949 | 44335  | 1  | 3 | 1 | 0.51676182 | 0.30102999 | 1 | 0 | 0.02438896 | 0          |
| chr2 | 79312949 | 79313008 | 60     | 1  | 3 | 1 | 0.30102999 | 0.30102999 | 2 | 0 | 0.08289318 | 0          |
| chr2 | 79313008 | 79314588 | 1581   | 1  | 3 | 0 | 0.30102999 | 0          | 2 | 0 | 0.08289318 | 0          |
| chr2 | 79314588 | 79363571 | 48984  | 1  | 3 | 0 | 0.51676182 | 0          | 1 | 0 | 0.02438896 | 0          |
| chr2 | 79363571 | 79817793 | 454223 | 9  | 3 | 1 | 0.51676182 | 0.30102999 | 1 | 0 | 0.02438896 | 0          |
| chr2 | 79817793 | 80376767 | 558975 | 14 | 3 | 1 | 0.51676182 | 0.1218695  | 1 | 1 | 0.02438896 | 0.1218695  |
| chr2 | 80376767 | 80540787 | 164021 | 6  | 1 | 1 | 0.51676182 | 0.30102999 | 1 | 0 | 0.02438896 | 0          |
| chr2 | 80540787 | 80662558 | 121772 | 2  | 2 | 1 | 0.30102999 | 0.30102999 | 1 | 0 | 0.05404976 | 0          |
| chr2 | 80662558 | 80752010 | 89453  | 3  | 1 | 1 | 0.51676182 | 0.30102999 | 1 | 0 | 0.02438896 | 0          |
| chr2 | 80752010 | 80811045 | 59036  | 3  | 0 | 1 | 0.51676182 | 0          | 1 | 0 | 0.02438896 | 0          |
| chr2 | 80811045 | 81119400 | 308356 | 3  | 2 | 0 | 0.30102999 | 0          | 1 | 0 | 0.05404976 | 0          |
| chr2 | 81119400 | 81509933 | 389334 | 2  | 0 | 0 | 0          | 0          | 1 | 0 | 0.30102999 | 0          |
| chr2 | 81509933 | 81583592 | 173660 | 2  | 2 | 0 | 0.11400001 | 0          | 1 | 0 | 0.05404976 | 0          |
| chr2 | 81583592 | 81756950 | 73359  | 1  | 2 | 0 | 0.61140001 | 0          | 2 | 0 | 0          | 0          |
| chr2 | 81756950 | 82361952 | 605003 | 5  | 1 | 0 | 0.30102999 | 0          | 0 | 0 | 0          | 0          |
| chr2 | 82361952 | 82790634 | 279827 | 4  | 1 | 0 | 0.30102999 | 0          | 0 | 0 | 0          | 0          |
| chr2 | 82790634 | 83090093 | 299460 | 4  | 1 | 1 | 0.30102999 | 0.30102999 | 0 | 0 | 0          | 0          |
| chr2 | 83090093 | 83452304 | 362212 | 2  | 0 | 1 | 0          | 0.30102999 | 0 | 0 | 0          | 0          |
| chr2 | 83452304 | 83895822 | 282810 | 3  | 0 | 0 | 0          | 0          | 1 | 0 | 0.30102999 | 0          |
| chr2 | 83895822 | 84184014 | 288193 | 2  | 2 | 0 | 0.30102999 | 0          | 1 | 0 | 0.05404976 | 0          |
| chr2 | 84184014 | 84424093 | 240080 | 2  | 3 | 0 | 0.51676182 | 0          | 1 | 0 | 0.02438896 | 0          |
| chr2 | 84424093 | 84609453 | 185361 | 2  | 3 | 0 | 0.30102999 | 0          | 2 | 0 | 0.08289318 | 0          |
| chr2 | 84609453 | 84668205 | 58753  | 3  | 0 | 2 | 0.17593012 | 0          | 3 | 0 | 0.17593012 | 0          |
| chr2 | 84668205 | 85091044 | 422840 | 11 | 3 | 0 | 0.30102999 | 0          | 2 | 0 | 0.08289318 | 0          |
| chr2 | 85091044 | 85240434 | 329391 | 7  | 3 | 0 | 0.17593012 | 0          | 3 | 0 | 0.17593012 | 0          |
| chr2 | 85240434 | 85420493 | 60     | 1  | 4 | 0 | 0.18734596 | 0          | 4 | 0 | 0.18734596 | 0          |
| chr2 | 85420493 | 85474356 | 53864  | 1  | 4 | 0 | 0.30102999 | 0          | 3 | 0 | 0.10122019 | 0          |
| chr2 | 85474356 | 8598458  | 124103 | 7  | 6 | 0 | 0.63695542 | 0          | 3 | 0 | 0.03070643 | 0          |
| chr2 | 8598458  | 8598506  | 49     | 1  | 6 | 0 | 0.44141547 | 0          | 4 | 0 | 0.06713722 | 0          |
| chr2 | 8598506  | 85678499 | 79994  | 6  | 6 | 0 | 0.63695542 | 0          | 3 | 0 | 0.03070643 | 0          |
| chr2 | 85678499 | 85769559 | 91061  | 1  | 4 | 0 | 0.30102999 | 0          | 3 | 0 | 0.10122019 | 0          |
| chr2 | 85769559 | 85787915 | 18357  | 3  | 4 | 0 | 0.18734596 | 0          | 4 | 0 | 0.18734596 | 0          |
| chr2 | 85787915 | 85924807 | 136893 | 5  | 4 | 0 | 0.47744371 | 0          | 2 | 0 | 0.0429175  | 0          |
| chr2 | 85924807 | 86002237 | 77431  | 2  | 3 | 0 | 0.30102999 | 0          | 2 | 0 | 0.08289318 | 0          |
| chr2 | 86002237 | 86002296 | 60     | 1  | 4 | 0 | 0.47744371 | 0          | 2 | 0 | 0.0429175  | 0          |
| chr2 | 86002296 | 86294476 | 292181 | 5  | 2 | 0 | 0.1575501  | 0          | 2 | 0 | 0.1575501  | 0          |
| chr2 | 86294476 | 86419467 | 124992 | 6  | 2 | 0 | 0.08289318 | 0          | 3 | 0 | 0.30102999 | 0          |
| chr2 | 86419467 | 86436834 | 17368  | 1  | 2 | 0 | 0.1575501  | 0          | 2 | 0 | 0.1575501  | 0          |
| chr2 | 86436834 | 86469217 | 32384  | 2  | 3 | 0 | 0.30102999 | 0          | 2 | 0 | 0.08289318 | 0          |
| chr2 | 86469217 | 86789240 | 320024 | 6  | 2 | 0 | 0.1575501  | 0          | 2 | 0 | 0.1575501  | 0          |
| chr2 | 86789240 | 8776206  | 986967 | 11 | 2 | 1 | 0.05404976 | 0          | 2 | 0 | 0.30102999 | 0          |
| chr2 | 8776206  | 87940883 | 164678 | 2  | 2 | 0 | 0.1575501  | 0          | 2 | 0 | 0.1575501  | 0          |
| chr2 | 87940883 | 88234876 | 293994 | 1  | 2 | 0 | 0.30102999 | 0          | 1 | 0 | 0.05404976 | 0          |
| chr2 | 88234876 | 88536245 | 301370 | 9  | 1 | 0 | 0.1218695  | 0          | 1 | 0 | 0.1218695  | 0          |
| chr2 | 88536245 | 88998788 | 462544 | 10 | 2 | 0 | 0.1575501  | 0          | 2 | 0 | 0.1575501  | 0          |
| chr2 | 88998788 | 89203402 | 204615 | 5  | 2 | 1 | 0.1575501  | 0.30102999 | 2 | 0 | 0.1575501  | 0          |
| chr2 | 89203402 | 89508067 | 304666 | 4  | 2 | 1 | 0.30102999 | 0.30102999 | 1 | 0 | 0.05404976 | 0          |
| chr2 | 89508067 | 89606481 | 98415  | 1  | 1 | 1 | 0.1218695  | 0.30102999 | 1 | 0 |            |            |

|      |           |           |        |   |   |   |            |            |   |   |            |            |
|------|-----------|-----------|--------|---|---|---|------------|------------|---|---|------------|------------|
| chr2 | 98467419  | 98467478  | 60     | 1 | 1 | 1 | 0.02438896 | 0.02438896 | 3 | 3 | 0.51676182 | 0.51676182 |
| chr2 | 98467478  | 98526012  | 58535  | 1 | 1 | 1 | 0.02438896 | 0.05404976 | 3 | 2 | 0.51676182 | 0.30102999 |
| chr2 | 98526012  | 98526071  | 60     | 1 | 1 | 1 | 0.01091641 | 0.05404976 | 4 | 2 | 0.76005302 | 0.30102999 |
| chr2 | 98526071  | 98562260  | 36190  | 1 | 1 | 1 | 0.02438896 | 0.05404976 | 3 | 2 | 0.51676182 | 0.30102999 |
| chr2 | 98562260  | 98709495  | 147236 | 3 | 1 | 2 | 0.02438896 | 0.1575501  | 3 | 2 | 0.51676182 | 0.1575501  |
| chr2 | 98709495  | 98809387  | 99893  | 3 | 1 | 2 | 0.02438896 | 0.08289318 | 3 | 3 | 0.51676182 | 0.30102999 |
| chr2 | 98809387  | 98809445  | 59     | 1 | 1 | 2 | 0.01091641 | 0.08289318 | 4 | 3 | 0.76005302 | 0.30102999 |
| chr2 | 98809445  | 99069899  | 260455 | 7 | 1 | 2 | 0.02438896 | 0.08289318 | 3 | 3 | 0.51676182 | 0.30102999 |
| chr2 | 99069899  | 99116256  | 46358  | 2 | 1 | 3 | 0.02438896 | 0.17593012 | 3 | 3 | 0.51676182 | 0.17593012 |
| chr2 | 99116256  | 99256623  | 140368 | 6 | 1 | 3 | 0.01091641 | 0.17593012 | 4 | 3 | 0.76005302 | 0.17593012 |
| chr2 | 99256623  | 99342875  | 86253  | 2 | 1 | 2 | 0.01091641 | 0.08289318 | 4 | 3 | 0.76005302 | 0.30102999 |
| chr2 | 99342875  | 99440874  | 98000  | 2 | 1 | 2 | 0.02438896 | 0.08289318 | 3 | 3 | 0.51676182 | 0.30102999 |
| chr2 | 99440874  | 99440933  | 60     | 1 | 1 | 2 | 0.00478973 | 0.0429175  | 5 | 4 | 1.02643191 | 0.47744371 |
| chr2 | 99440933  | 99487756  | 46824  | 1 | 1 | 2 | 0.01091641 | 0.0429175  | 4 | 4 | 0.76005302 | 0.47744371 |
| chr2 | 99487756  | 99554074  | 66319  | 2 | 1 | 2 | 0.01091641 | 0.08289318 | 4 | 3 | 0.76005302 | 0.30102999 |
| chr2 | 99554074  | 99614488  | 60415  | 1 | 1 | 2 | 0.02438896 | 0.08289318 | 3 | 3 | 0.51676182 | 0.30102999 |
| chr2 | 99614488  | 99635037  | 20550  | 2 | 1 | 2 | 0.02438896 | 0.0429175  | 3 | 4 | 0.51676182 | 0.47744371 |
| chr2 | 99635037  | 99743468  | 108432 | 1 | 1 | 2 | 0.02438896 | 0.08289318 | 3 | 3 | 0.51676182 | 0.30102999 |
| chr2 | 99743468  | 99801244  | 57777  | 6 | 1 | 2 | 0.02438896 | 0.17593012 | 3 | 3 | 0.51676182 | 0.17593012 |
| chr2 | 99801244  | 99909813  | 108572 | 1 | 1 | 2 | 0.02438896 | 0.08289318 | 3 | 3 | 0.51676182 | 0.30102999 |
| chr2 | 99909813  | 99954049  | 44235  | 3 | 1 | 3 | 0.02438896 | 0.10122019 | 3 | 4 | 0.51676182 | 0.30102999 |
| chr2 | 99954049  | 100017576 | 63528  | 2 | 1 | 3 | 0.02438896 | 0.17593012 | 3 | 3 | 0.51676182 | 0.17593012 |
| chr2 | 100017576 | 100017635 | 60     | 1 | 1 | 3 | 0.02438896 | 0.10122019 | 3 | 3 | 0.51676182 | 0.30102999 |
| chr2 | 100017635 | 100103999 | 86365  | 2 | 1 | 3 | 0.02438896 | 0.17593012 | 3 | 3 | 0.51676182 | 0.17593012 |
| chr2 | 100103999 | 100104058 | 60     | 1 | 1 | 3 | 0.02438896 | 0.10122019 | 3 | 4 | 0.51676182 | 0.30102999 |
| chr2 | 100104058 | 100182106 | 78049  | 1 | 1 | 3 | 0.05404976 | 0.10122019 | 2 | 4 | 0.30102999 | 0.30102999 |
| chr2 | 100182106 | 100260926 | 78821  | 1 | 1 | 3 | 0.05404976 | 0.30102999 | 2 | 2 | 0.30102999 | 0.08289318 |
| chr2 | 100260926 | 100288221 | 27296  | 2 | 1 | 3 | 0.02438896 | 0.30102999 | 3 | 2 | 0.51676182 | 0.08289318 |
| chr2 | 100288221 | 100625292 | 337072 | 8 | 1 | 3 | 0.05404976 | 0.30102999 | 2 | 2 | 0.30102999 | 0.08289318 |
| chr2 | 100625292 | 100667897 | 42606  | 3 | 1 | 3 | 0.01091641 | 0.17593012 | 4 | 3 | 0.76005302 | 0.17593012 |
| chr2 | 100667897 | 100749773 | 81877  | 3 | 1 | 3 | 0.01091641 | 0.10122019 | 4 | 4 | 0.76005302 | 0.30102999 |
| chr2 | 100749773 | 100848899 | 91927  | 2 | 1 | 3 | 0.01091641 | 0.1598258  | 4 | 7 | 0.76005302 | 0.84395715 |
| chr2 | 100848899 | 100921820 | 72922  | 2 | 1 | 3 | 0.05404976 | 0.1598258  | 2 | 7 | 0.30102999 | 0.84395715 |
| chr2 | 100921820 | 100921879 | 60     | 1 | 1 | 3 | 0.02438896 | 0.1598258  | 3 | 7 | 0.51676182 | 0.84395715 |
| chr2 | 100921879 | 101031590 | 109712 | 2 | 1 | 3 | 0.05404976 | 0.1598258  | 2 | 7 | 0.30102999 | 0.84395715 |
| chr2 | 101031590 | 101190300 | 158711 | 2 | 1 | 3 | 0.1218695  | 0.03070643 | 1 | 6 | 0.1218695  | 0.63695542 |
| chr2 | 101190300 | 101223568 | 33269  | 2 | 1 | 3 | 0.05404976 | 0.03070643 | 2 | 6 | 0.30102999 | 0.63695542 |
| chr2 | 101223568 | 101480160 | 256593 | 3 | 1 | 3 | 0.05404976 | 0.05670724 | 2 | 5 | 0.30102999 | 0.45545077 |
| chr2 | 101480160 | 101611527 | 131368 | 3 | 1 | 3 | 0.1218695  | 0.05670724 | 1 | 5 | 0.1218695  | 0.45545077 |
| chr2 | 101611527 | 101627972 | 16446  | 3 | 1 | 3 | 0.05404976 | 0.05670724 | 2 | 5 | 0.30102999 | 0.45545077 |
| chr2 | 101627972 | 101628026 | 55     | 1 | 1 | 3 | 0.05404976 | 0.03070643 | 6 | 5 | 0.30102999 | 0.63695542 |
| chr2 | 101628026 | 101809623 | 181598 | 4 | 1 | 3 | 0.05404976 | 0.05670724 | 2 | 5 | 0.30102999 | 0.45545077 |
| chr2 | 101809623 | 101883289 | 73667  | 1 | 1 | 3 | 0.1218695  | 0.05670724 | 1 | 5 | 0.1218695  | 0.45545077 |
| chr2 | 101883289 | 101918729 | 35441  | 3 | 1 | 3 | 0.1218695  | 0.03070643 | 1 | 6 | 0.1218695  | 0.63695542 |
| chr2 | 101918729 | 101918788 | 60     | 1 | 1 | 3 | 0.05404976 | 0.03070643 | 2 | 6 | 0.30102999 | 0.63695542 |
| chr2 | 101918788 | 102288554 | 369767 | 8 | 1 | 3 | 0.05404976 | 0.05670724 | 2 | 5 | 0.30102999 | 0.45545077 |
| chr2 | 102288554 | 102490195 | 201642 | 6 | 1 | 3 | 0.05404976 | 0.03070643 | 6 | 6 | 0.30102999 | 0.63695542 |
| chr2 | 102490195 | 102546955 | 56761  | 3 | 1 | 3 | 0.1218695  | 0.03070643 | 1 | 6 | 0.1218695  | 0.63695542 |
| chr2 | 102546955 | 102685545 | 138591 | 2 | 1 | 3 | 0.1218695  | 0.05670724 | 1 | 5 | 0.1218695  | 0.45545077 |
| chr2 | 102685545 | 102818143 | 132599 | 3 | 1 | 3 | 0.1218695  | 0.10122019 | 4 | 4 | 0.1218695  | 0.30102999 |
| chr2 | 102818143 | 102855769 | 37627  | 2 | 1 | 4 | 0.1218695  | 0.18734596 | 1 | 4 | 0.1218695  | 0.18734596 |
| chr2 | 102855769 | 103013191 | 157423 | 5 | 1 | 2 | 0.1218695  | 0.0429175  | 4 | 4 | 0.1218695  | 0.47744371 |
| chr2 | 103013191 | 103057812 | 44622  | 2 | 1 | 3 | 0.1218695  | 0.10122019 | 1 | 4 | 0.1218695  | 0.30102999 |
| chr2 | 103057812 | 103148474 | 90663  | 2 | 1 | 2 | 0.1218695  | 0.0429175  | 1 | 4 | 0.1218695  | 0.47744371 |
| chr2 | 103148474 | 103148533 | 60     | 1 | 1 | 3 | 0.1218695  | 0.10122019 | 1 | 4 | 0.1218695  | 0.30102999 |
| chr2 | 103148533 | 103311486 | 162954 | 3 | 1 | 1 | 0.1218695  | 0.05404976 | 1 | 2 | 0.1218695  | 0.30102999 |
| chr2 | 103311486 | 103311545 | 60     | 1 | 1 | 2 | 0.1218695  | 0.1575501  | 1 | 2 | 0.1218695  | 0.1575501  |
| chr2 | 103311545 | 103432491 | 120947 | 3 | 1 | 2 | 0.1218695  | 0.30102999 | 1 | 1 | 0.1218695  | 0.05404976 |
| chr2 | 103432491 | 103504768 | 72278  | 2 | 1 | 2 | 0.1218695  | 0.1575501  | 1 | 2 | 0.1218695  | 0.1575501  |
| chr2 | 103504768 | 103603707 | 98940  | 2 | 1 | 3 | 0.1218695  | 0.17593012 | 1 | 2 | 0.1218695  | 0.17593012 |
| chr2 | 103603707 | 103603766 | 60     | 1 | 1 | 3 | 0.1218695  | 0.10122019 | 1 | 4 | 0.1218695  | 0.30102999 |
| chr2 | 103603766 | 103879269 | 275504 | 1 | 1 | 1 | 0.30102999 | 0.1218695  | 0 | 1 | 0          | 0          |
| chr2 | 103879269 | 104099844 | 220576 | 1 | 0 | 0 | 0          | 0          | 0 | 1 | 0          | 0          |
| chr2 | 104099844 | 104099903 | 60     | 1 | 0 | 1 | 0          | 0.05404976 | 0 | 2 | 0          | 0          |
| chr2 | 104356251 | 104356310 | 60     | 1 | 0 | 1 | 0          | 0.30102999 | 0 | 0 | 0          | 0          |
| chr2 | 104514353 | 104731573 | 217221 | 2 | 0 | 0 | 0          | 0          | 0 | 0 | 0          | 0          |
| chr2 | 104731573 | 104731632 | 60     | 1 | 0 | 1 | 0          | 0.01091641 | 0 | 4 | 0          | 0          |
| chr2 | 104731632 | 104922046 | 190415 | 1 | 0 | 1 | 0          | 0.02438896 | 0 | 0 | 0          | 0          |
| chr2 | 104922046 | 104922105 | 60     | 1 | 1 | 1 | 0.1218695  | 0.02438896 | 1 | 3 | 0.1218695  | 0.51676182 |
| chr2 | 104922105 | 105450733 | 528629 | 6 | 1 | 0 | 0.1218695  | 0          | 1 | 1 | 0.1218695  | 0.30102999 |
| chr2 | 105450733 | 105653729 | 202997 | 3 | 1 | 0 | 0.1218695  | 0          | 1 | 2 | 0.1218695  | 0.61140001 |
| chr2 | 105653729 | 105756825 | 103097 | 3 | 1 | 1 | 0.1218695  | 0.05404976 | 1 | 2 | 0.1218695  | 0.30102999 |
| chr2 | 105756825 | 105756884 | 60     | 1 | 1 | 1 | 0.1218695  | 0.02438896 | 1 | 3 | 0.1218695  | 0.51676182 |
| chr2 | 105756884 | 106005707 | 248824 | 7 | 1 | 1 | 0.1218695  | 0.05404976 | 1 | 2 | 0.1218695  | 0.30102999 |
| chr2 | 106005707 | 106506684 | 500978 | 6 | 1 | 1 | 0.1218695  | 0.1218695  | 1 | 1 | 0.1218695  | 0.1218695  |
| chr2 | 106506684 | 106710185 | 203502 | 4 | 1 | 0 | 0.1218695  | 0          | 1 | 1 | 0.1218695  | 0.30102999 |
| chr2 | 106710185 | 106797328 | 87144  | 3 | 0 | 0 | 0.1218695  | 0          | 1 | 2 | 0.1218695  | 0.61140001 |
| chr2 | 106797328 | 106817917 | 20590  | 2 | 1 | 1 | 0.1218695  | 0.05404976 | 1 | 2 | 0.1218695  | 0.30102999 |
| chr2 | 106817917 | 106929257 | 111341 | 1 | 0 | 0 | 0.1218695  | 0          | 1 | 1 | 0.1218695  | 0.30102999 |
| chr2 | 106929257 | 106929316 | 60     | 1 | 1 | 0 | 0.1218695  | 0          | 1 | 3 | 0.1218695  | 0.93173516 |
| chr2 | 106929316 | 107429866 | 500551 | 4 | 1 | 0 | 0.1218695  | 0          | 1 | 2 | 0.1218695  | 0.61140001 |
| chr2 | 107429866 | 107496805 | 66940  | 3 | 1 | 2 | 0.1218695  | 0.08289318 | 1 | 3 | 0.1218695  | 0.30102999 |
| chr2 | 107496805 | 107682262 | 185458 | 1 | 1 | 1 | 0.1218695  | 0.02438896 | 1 | 3 | 0.1218695  | 0.51676182 |
| chr2 | 107682262 | 107949894 | 267633 | 2 | 0 | 0 | 0          | 0          | 1 | 2 | 0.30102999 | 0.61140001 |
| chr2 | 107949894 | 107949953 | 60     | 1 | 0 | 0 | 0          | 0          | 1 | 3 | 0.30102999 | 0.93173516 |
| chr2 | 107949953 | 108083897 | 133945 | 1 | 0 | 0 | 0          | 0          | 1 | 2 | 0.30102999 | 0.61140001 |
| chr2 | 108083897 | 108272055 | 188159 | 2 | 1 | 0 | 0.1218695  | 0          | 1 | 2 | 0.1218695  | 0.61140001 |
| chr2 | 108272055 | 108272114 | 60     | 1 | 1 | 0 | 0.1218695  | 0          | 1 | 3 | 0.1218695  | 0.93173516 |
| chr2 | 108272114 | 108403193 | 131080 | 1 | 0 | 0 | 0          | 0          | 1 | 3 | 0.30102999 | 0.93173516 |
| chr2 | 108403193 | 108403252 | 60     | 1 | 0 | 1 | 0          | 0.02438896 | 1 | 3 | 0.30102999 | 0.51676182 |
| chr2 | 108403252 | 108575844 | 172593 | 1 | 0 | 1 | 0          | 0.05404976 | 1 | 2 | 0.30102999 | 0.30102999 |
| chr2 | 108575844 | 108925066 | 349223 | 8 | 1 | 1 | 0.05404976 | 0.05404976 | 2 | 2 | 0.30102999 | 0.301029   |

|      |           |           |        |    |     |   |            |            |   |   |            |            |
|------|-----------|-----------|--------|----|-----|---|------------|------------|---|---|------------|------------|
| chr2 | 112592087 | 112702624 | 110538 | 4  | 1   | 1 | 0.05404976 | 0.01091641 | 2 | 4 | 0.30102999 | 0.76005302 |
| chr2 | 112702624 | 112776973 | 74350  | 2  | 1   | 1 | 0.1218695  | 0.01091641 | 1 | 4 | 0.1218695  | 0.76005302 |
| chr2 | 112776973 | 112818801 | 41829  | 2  | 1   | 1 | 0.05404976 | 0.01091641 | 2 | 4 | 0.30102999 | 0.76005302 |
| chr2 | 112818801 | 113631898 | 813098 | 21 | 1   | 1 | 0.1218695  | 0.01091641 | 1 | 4 | 0.1218695  | 0.76005302 |
| chr2 | 113631898 | 113671257 | 39360  | 2  | 1   | 1 | 0.05404976 | 0.01091641 | 2 | 4 | 0.30102999 | 0.76005302 |
| chr2 | 113671257 | 113671316 | 60     | 1  | 1   | 1 | 0.05404976 | 0.00478973 | 1 | 5 | 0.30102999 | 1.02643191 |
| chr2 | 113671316 | 113742578 | 71263  | 1  | 1   | 1 | 0.1218695  | 0.00478973 | 2 | 5 | 0.1218695  | 1.02643191 |
| chr2 | 113742578 | 113780063 | 37486  | 3  | 1   | 1 | 0.1218695  | 0.00204627 | 1 | 6 | 0.1218695  | 1.31360226 |
| chr2 | 113780063 | 113948613 | 168551 | 6  | 1   | 1 | 0.1218695  | 0.00478973 | 1 | 5 | 0.1218695  | 1.02643191 |
| chr2 | 113948613 | 114007431 | 58819  | 2  | 1   | 1 | 0.1218695  | 0.01091641 | 1 | 4 | 0.1218695  | 0.76005302 |
| chr2 | 114007431 | 114699960 | 692530 | 12 | 1   | 1 | 0.1218695  | 0.00478973 | 1 | 5 | 0.1218695  | 1.02643191 |
| chr2 | 114699960 | 114844660 | 144701 | 2  | 1   | 0 | 0.1218695  | 0          | 1 | 5 | 0.1218695  | 1.60515106 |
| chr2 | 114844660 | 115003555 | 158896 | 1  | 1   | 0 | 0.1218695  | 0          | 1 | 4 | 0.1218695  | 1.26272838 |
| chr2 | 115003555 | 115200111 | 196557 | 2  | 1   | 0 | 0.1218695  | 0          | 1 | 3 | 0.1218695  | 0.93173516 |
| chr2 | 115200111 | 115738271 | 538161 | 10 | 1   | 0 | 0.1218695  | 0          | 1 | 5 | 0.1218695  | 1.60515106 |
| chr2 | 115738271 | 116026016 | 287746 | 6  | 1   | 0 | 0.1218695  | 0          | 1 | 6 | 0.1218695  | 1.95986592 |
| chr2 | 116026016 | 116094610 | 68595  | 3  | 1   | 0 | 0.1218695  | 0          | 1 | 5 | 0.1218695  | 1.60515106 |
| chr2 | 116094610 | 116195266 | 100657 | 3  | 1   | 0 | 0.1218695  | 0          | 1 | 6 | 0.1218695  | 1.95986592 |
| chr2 | 116195266 | 116374560 | 179295 | 4  | 1   | 0 | 0.1218695  | 0          | 1 | 5 | 0.1218695  | 1.60515106 |
| chr2 | 116374560 | 116418952 | 44393  | 2  | 1   | 1 | 0.1218695  | 0          | 1 | 6 | 0.1218695  | 1.95986592 |
| chr2 | 116418952 | 116464046 | 45095  | 2  | 1   | 1 | 0.1218695  | 0.00204627 | 1 | 6 | 0.1218695  | 1.31360226 |
| chr2 | 116464046 | 116735678 | 271633 | 4  | 1   | 1 | 0.1218695  | 0          | 1 | 6 | 0.1218695  | 1.60515106 |
| chr2 | 116735678 | 116735737 | 60     | 1  | 1   | 1 | 0.1218695  | 0.00204627 | 1 | 5 | 0.1218695  | 1.31360226 |
| chr2 | 116735737 | 116895746 | 160010 | 1  | 1   | 0 | 0.1218695  | 0          | 1 | 5 | 0.1218695  | 1.60515106 |
| chr2 | 116895746 | 117074480 | 178735 | 1  | 1   | 0 | 0          | 0          | 1 | 5 | 0.30102999 | 1.60515106 |
| chr2 | 117074480 | 117074539 | 60     | 1  | 1   | 0 | 0          | 0          | 2 | 5 | 0.61140001 | 1.60515106 |
| chr2 | 117074539 | 117353027 | 278489 | 2  | 1   | 0 | 0          | 0          | 1 | 3 | 0.30102999 | 0.93173516 |
| chr2 | 117353027 | 117679959 | 326933 | 2  | 1   | 0 | 0          | 0          | 2 | 0 | 0          | 0.61140001 |
| chr2 | 117679959 | 117680018 | 60     | 1  | 1   | 0 | 0.05404976 | 0          | 2 | 3 | 0.30102999 | 0.93173516 |
| chr2 | 117680018 | 117830337 | 150320 | 1  | 1   | 0 | 0          | 0          | 2 | 3 | 0.61140001 | 0.93173516 |
| chr2 | 117830337 | 117959656 | 129320 | 1  | 1   | 0 | 0          | 0          | 2 | 2 | 0.61140001 | 0.61140001 |
| chr2 | 117959656 | 118485046 | 525391 | 5  | 1   | 0 | 0.05404976 | 0          | 2 | 2 | 0.30102999 | 0.61140001 |
| chr2 | 118485046 | 118647245 | 162200 | 4  | 1   | 0 | 0.05404976 | 0          | 2 | 3 | 0.30102999 | 0.93173516 |
| chr2 | 118647245 | 118735793 | 88549  | 3  | 1   | 1 | 0.05404976 | 0.01091641 | 2 | 4 | 0.30102999 | 0.76005302 |
| chr2 | 118735793 | 119071856 | 336064 | 5  | 1   | 0 | 0.05404976 | 0          | 3 | 3 | 0.30102999 | 0.93173516 |
| chr2 | 119071856 | 119071915 | 60     | 1  | 1   | 0 | 0.05404976 | 0          | 2 | 4 | 0.30102999 | 1.26272838 |
| chr2 | 119071915 | 119336704 | 264790 | 1  | 1   | 0 | 0.05404976 | 0          | 2 | 3 | 0.30102999 | 0.93173516 |
| chr2 | 119336704 | 119541107 | 204404 | 2  | 1   | 1 | 0.05404976 | 0.02438986 | 2 | 3 | 0.30102999 | 0.51676182 |
| chr2 | 119541107 | 119541166 | 60     | 1  | 1   | 1 | 0.05404976 | 0.01091641 | 2 | 4 | 0.30102999 | 0.76005302 |
| chr2 | 119541166 | 119833027 | 291862 | 5  | 1   | 1 | 0.1218695  | 0.02438986 | 1 | 3 | 0.1218695  | 0.51676182 |
| chr2 | 119833027 | 119913861 | 80835  | 2  | 1   | 1 | 0.05404976 | 0.02438986 | 2 | 3 | 0.30102999 | 0.51676182 |
| chr2 | 119913861 | 119951896 | 38036  | 1  | 1   | 1 | 0.1218695  | 0.02438986 | 1 | 3 | 0.1218695  | 0.51676182 |
| chr2 | 119951896 | 119990907 | 39012  | 2  | 1   | 1 | 0.05404976 | 0.01091641 | 2 | 4 | 0.30102999 | 0.76005302 |
| chr2 | 119990907 | 120059513 | 68607  | 2  | 1   | 1 | 0.05404976 | 0.02438986 | 2 | 3 | 0.30102999 | 0.51676182 |
| chr2 | 120059513 | 120194944 | 135432 | 4  | 1   | 1 | 0.05404976 | 0.01091641 | 2 | 4 | 0.30102999 | 0.76005302 |
| chr2 | 120194944 | 120361587 | 166644 | 4  | 1   | 1 | 0.1218695  | 0.01091641 | 1 | 4 | 0.1218695  | 0.76005302 |
| chr2 | 120361587 | 120480623 | 119037 | 4  | 1   | 1 | 0.1218695  | 0.02438986 | 1 | 3 | 0.1218695  | 0.51676182 |
| chr2 | 120480623 | 120520224 | 39602  | 1  | 1   | 1 | 0.1218695  | 0.05404976 | 1 | 2 | 0.1218695  | 0.30102999 |
| chr2 | 120520224 | 120567392 | 47169  | 2  | 1   | 1 | 0.1218695  | 0.02438986 | 1 | 3 | 0.1218695  | 0.51676182 |
| chr2 | 120567392 | 120628484 | 61093  | 2  | 1   | 1 | 0.1218695  | 0.01091641 | 1 | 4 | 0.1218695  | 0.76005302 |
| chr2 | 120628484 | 120900646 | 272163 | 7  | 1   | 1 | 0.1218695  | 0.00478973 | 1 | 5 | 0.1218695  | 1.02643191 |
| chr2 | 120900646 | 121012182 | 111537 | 2  | 1   | 1 | 0.1218695  | 0.01091641 | 1 | 4 | 0.1218695  | 0.76005302 |
| chr2 | 121012182 | 121043478 | 31297  | 2  | 1   | 1 | 0.1218695  | 0.00478973 | 1 | 5 | 0.1218695  | 1.02643191 |
| chr2 | 121043478 | 121050848 | 7371   | 2  | 1   | 1 | 0.1218695  | 0.00204627 | 1 | 6 | 0.1218695  | 1.31360226 |
| chr2 | 121050848 | 121106344 | 55497  | 1  | 1   | 1 | 0.1218695  | 0.00478973 | 1 | 5 | 0.1218695  | 1.02643191 |
| chr2 | 121106344 | 121394787 | 288444 | 2  | 1   | 1 | 0.1218695  | 0.01091641 | 1 | 4 | 0.1218695  | 0.76005302 |
| chr2 | 121394787 | 121486947 | 92161  | 2  | 1   | 1 | 0.1218695  | 0.00478973 | 1 | 5 | 0.1218695  | 1.02643191 |
| chr2 | 121486947 | 121487006 | 60     | 1  | 1   | 1 | 0.1218695  | 0.00204627 | 1 | 6 | 0.1218695  | 1.31360226 |
| chr2 | 121487006 | 121684726 | 197721 | 5  | 1   | 1 | 0.1218695  | 0.00478973 | 1 | 5 | 0.1218695  | 1.02643191 |
| chr2 | 121684726 | 121684785 | 60     | 1  | 1   | 1 | 0.1218695  | 8.47E-04   | 1 | 7 | 0.1218695  | 1.62048027 |
| chr2 | 121684785 | 121786284 | 101500 | 2  | 1   | 1 | 0.1218695  | 0          | 1 | 7 | 0.1218695  | 2.3278427  |
| chr2 | 121786284 | 121786343 | 60     | 1  | 1   | 1 | 0.1218695  | 8.47E-04   | 1 | 7 | 0.1218695  | 1.62048027 |
| chr2 | 121786343 | 122003852 | 217510 | 3  | 1   | 0 | 0          | 0          | 6 | 0 | 0.30102999 | 1.95986592 |
| chr2 | 122003852 | 122095336 | 91485  | 1  | 1   | 0 | 0          | 0          | 5 | 0 | 0.30102999 | 1.60515106 |
| chr2 | 122095336 | 122363764 | 268429 | 6  | 1   | 0 | 0          | 0          | 6 | 0 | 0.30102999 | 1.95986592 |
| chr2 | 122363764 | 122484636 | 120973 | 3  | 1   | 0 | 0          | 0          | 5 | 0 | 0.30102999 | 1.60515106 |
| chr2 | 122484636 | 122529993 | 68558  | 3  | 1   | 0 | 0          | 0          | 1 | 1 | 0.30102999 | 1.26272838 |
| chr2 | 122529993 | 122662279 | 109287 | 1  | 1   | 0 | 0          | 0          | 3 | 0 | 0.30102999 | 0.93173516 |
| chr2 | 122662279 | 122662338 | 60     | 1  | 1   | 0 | 0.02438986 | 0          | 3 | 0 | 0.30102999 | 0.51676182 |
| chr2 | 122662338 | 123086730 | 424393 | 3  | 1   | 0 | 0          | 0          | 2 | 0 | 0.30102999 | 0.61140001 |
| chr2 | 123086730 | 123086789 | 60     | 1  | 1   | 0 | 0.05404976 | 0          | 2 | 0 | 0.30102999 | 0.30102999 |
| chr2 | 123086789 | 123161667 | 74879  | 1  | 1   | 0 | 0.1218695  | 0          | 0 | 1 | 0          | 0.1218695  |
| chr2 | 123161667 | 123396233 | 234567 | 1  | 1   | 0 | 0          | 0          | 1 | 0 | 0.30102999 | 0.30102999 |
| chr2 | 123396233 | 123973518 | 149712 | 2  | 1   | 0 | 0          | 0          | 1 | 0 | 0.30102999 | 0.30102999 |
| chr2 | 123973518 | 124398034 | 424517 | 3  | 1   | 0 | 0          | 0          | 2 | 0 | 0.61140001 | 0.61140001 |
| chr2 | 124398034 | 124398093 | 60     | 1  | 1   | 0 | 0.1218695  | 0          | 1 | 4 | 0.1218695  | 1.26272838 |
| chr2 | 124398093 | 124574590 | 176498 | 1  | 1   | 0 | 0.1218695  | 0          | 1 | 3 | 0.30102999 | 0.93173516 |
| chr2 | 124574590 | 124770883 | 196294 | 2  | 1   | 0 | 0.1218695  | 0          | 1 | 5 | 0.1218695  | 1.60515106 |
| chr2 | 124770883 | 124816328 | 45446  | 2  | 1   | 1 | 0.1218695  | 0.00204627 | 1 | 6 | 0.1218695  | 1.31360226 |
| chr2 | 124816328 | 124816387 | 60     | 1  | 1   | 2 | 0.1218695  | 0.00493743 | 1 | 7 | 0.1218695  | 1.16581773 |
| chr2 | 124816387 | 125261841 | 445455 | 8  | 1   | 1 | 0.1218695  | 0.00204627 | 1 | 6 | 0.1218695  | 1.31360226 |
| chr2 | 125261841 | 125611168 | 349328 | 9  | 1   | 2 | 0.1218695  | 0.01053319 | 1 | 6 | 0.1218695  | 0.91219088 |
| chr2 | 125611168 | 125672677 | 61510  | 2  | 1   | 2 | 0.1218695  | 0.00493743 | 1 | 7 | 0.1218695  | 1.16581773 |
| chr2 | 125672677 | 125805899 | 133223 | 2  | 1   | 1 | 0.1218695  | 8.47E-04   | 1 | 7 | 0.1218695  | 1.62048027 |
| chr2 | 125805899 | 126218634 | 412736 | 2  | 1   | 1 | 0.1218695  | 0.00204627 | 1 | 6 | 0.1218695  | 1.31360226 |
| chr2 | 126218634 | 126218693 | 60     | 1  | 1   | 2 | 0.1218695  | 0.01053319 | 1 | 6 | 0.1218695  | 0.91219088 |
| chr2 | 126218693 | 126482320 | 263628 | 1  | 1   | 0 | 0          | 0          | 1 | 5 | 0.30102999 | 1.60515106 |
| chr2 | 126482320 | 126916189 | 433870 | 2  | 1   | 0 | 0          | 0          | 2 | 0 | 0.61140001 | 0.61140001 |
| chr2 | 126916189 | 127083044 | 166856 | 2  | 1   | 0 | 8.47E-04   | 0          | 7 | 0 | 0.61140001 | 1.62048027 |
| chr2 | 127083044 | 127184889 | 101846 | 2  | 1   | 0 | 0          | 3.39E-04   | 0 | 8 | 0          | 1.94674965 |
| chr2 | 127184889 | 127184948 | 60     | 1  | 1   | 1 | 0.30102999 | 3.39E-04   | 0 | 8 | 0          | 1.94674965 |
| chr2 | 127184948 | 127433973 | 249026 | 2  | 1   | 0 | 0          | 3.39E-04   | 0 | 8 | 0          | 1.94674965 |
| chr2 | 127433973 | 127449298 | 15326  | 2  | 1   | 1 | 0.30102999 | 3.39E-04   | 0 | 8 | 0          | 1.94674965 |
| chr2 | 127449298 | 127524507 | 75210  | 2  | 1</ |   |            |            |   |   |            |            |

|      |           |           |        |    |   |   |            |            |     |   |            |            |            |
|------|-----------|-----------|--------|----|---|---|------------|------------|-----|---|------------|------------|------------|
| chr2 | 130786789 | 130964454 | 177666 | 2  | 1 | 0 | 0.30102999 | 0          | 0   | 3 | 0          | 0.93173516 |            |
| chr2 | 130964454 | 130964513 | 60     | 1  | 1 | 0 | 0.30102999 | 0          | 0   | 4 | 0          | 1.26272838 |            |
| chr2 | 130964513 | 131095306 | 130794 | 3  | 1 | 0 | 0.30102999 | 0          | 0   | 3 | 0          | 0.93173516 |            |
| chr2 | 131095306 | 131317614 | 222309 | 5  | 1 | 0 | 0.30102999 | 0          | 0   | 2 | 0          | 0.61140001 |            |
| chr2 | 131317614 | 131317673 | 60     | 1  | 1 | 0 | 0.05404976 | 0          | 2   | 2 | 0.30102999 | 0.61140001 |            |
| chr2 | 131317673 | 131758279 | 440607 | 6  | 1 | 0 | 0.1218695  | 0          | 1   | 2 | 0.1218695  | 0.61140001 |            |
| chr2 | 131758279 | 131905082 | 146804 | 6  | 1 | 0 | 0.05404976 | 0          | 2   | 2 | 0.30102999 | 0.61140001 |            |
| chr2 | 131905082 | 132098109 | 193028 | 1  | 1 | 0 | 0.1218695  | 0          | 1   | 1 | 0.1218695  | 0.30102999 |            |
| chr2 | 132098109 | 132190346 | 92238  | 2  | 1 | 0 | 0.1218695  | 0          | 1   | 0 | 0.1218695  | 0          |            |
| chr2 | 132190346 | 132493872 | 303527 | 3  | 1 | 0 | 0.1218695  | 0          | 1   | 1 | 0.1218695  | 0.30102999 |            |
| chr2 | 132493872 | 132493931 | 60     | 1  | 1 | 1 | 0.05404976 | 0.02438896 | 2   | 3 | 0.30102999 | 0.51676182 |            |
| chr2 | 132493931 | 133036817 | 542887 | 2  | 0 | 1 | 0          | 0.05404976 | 2   | 2 | 0.61140001 | 0.30102999 |            |
| chr2 | 133036817 | 133147448 | 110632 | 1  | 0 | 1 | 0          | 0.1218695  | 1   | 1 | 0.1218695  | 0.30102999 |            |
| chr2 | 133147448 | 133217677 | 70230  | 3  | 0 | 1 | 0          | 0.02438896 | 1   | 3 | 0.30102999 | 0.51676182 |            |
| chr2 | 133217677 | 133253506 | 35830  | 2  | 1 | 0 | 0.01091641 | 0.01091641 | 4   | 4 | 0.30102999 | 0.76005302 |            |
| chr2 | 133253506 | 133306434 | 52929  | 1  | 0 | 1 | 0          | 0.02438896 | 1   | 3 | 0.30102999 | 0.51676182 |            |
| chr2 | 133306434 | 133347724 | 41291  | 2  | 0 | 1 | 0          | 0.02438896 | 2   | 3 | 0.61140001 | 0.51676182 |            |
| chr2 | 133347724 | 133402552 | 54829  | 3  | 0 | 1 | 0          | 0.00478973 | 2   | 5 | 0.61140001 | 1.02643191 |            |
| chr2 | 133402552 | 133458454 | 55903  | 4  | 0 | 1 | 0          | 0.00204627 | 2   | 6 | 0.61140001 | 1.31360226 |            |
| chr2 | 133458454 | 134055460 | 597007 | 11 | 0 | 1 | 0          | 0.00478973 | 2   | 5 | 0.61140001 | 1.02643191 |            |
| chr2 | 134055460 | 134055519 | 60     | 1  | 0 | 1 | 0          | 0.00204627 | 2   | 6 | 0.61140001 | 1.31360226 |            |
| chr2 | 134055519 | 134095816 | 40298  | 1  | 0 | 1 | 0          | 0.00478973 | 2   | 5 | 0.61140001 | 1.02643191 |            |
| chr2 | 134095816 | 134208785 | 112970 | 2  | 0 | 1 | 0          | 0.02438896 | 2   | 3 | 0.61140001 | 0.51676182 |            |
| chr2 | 134208785 | 134344602 | 135818 | 3  | 0 | 1 | 0          | 0.05404976 | 2   | 2 | 0.30102999 | 0.61140001 |            |
| chr2 | 134344602 | 134400111 | 55510  | 1  | 0 | 1 | 0          | 0.1218695  | 2   | 1 | 0.61140001 | 0.1218695  |            |
| chr2 | 134400111 | 134400170 | 60     | 1  | 0 | 1 | 0          | 0.05404976 | 2   | 2 | 0.61140001 | 0.30102999 |            |
| chr2 | 134400170 | 134665458 | 265289 | 1  | 0 | 1 | 0          | 0.1218695  | 1   | 1 | 0.30102999 | 0.1218695  |            |
| chr2 | 134665458 | 134665517 | 60     | 1  | 1 | 1 | 0.1218695  | 0.1218695  | 1   | 1 | 0.1218695  | 0.1218695  |            |
| chr2 | 134665517 | 134953062 | 287546 | 1  | 1 | 0 | 0.1218695  | 0          | 1   | 0 | 0.1218695  | 0          |            |
| chr2 | 134953062 | 134953121 | 60     | 1  | 1 | 0 | 0.1218695  | 0          | 1   | 1 | 0.1218695  | 0.30102999 |            |
| chr2 | 134953121 | 135011015 | 57895  | 1  | 1 | 0 | 0.30102999 | 0          | 0   | 1 | 0.30102999 | 0          |            |
| chr2 | 135011015 | 135062506 | 51492  | 2  | 1 | 1 | 0.30102999 | 0.02438896 | 0   | 3 | 0          | 0.51676182 |            |
| chr2 | 135062506 | 135062565 | 60     | 1  | 1 | 1 | 0.1218695  | 0.02438896 | 1   | 3 | 0.1218695  | 0.51676182 |            |
| chr2 | 135062565 | 135275483 | 212919 | 5  | 1 | 0 | 0.1218695  | 0          | 1   | 3 | 0.1218695  | 0.93173516 |            |
| chr2 | 135275483 | 135301967 | 26485  | 2  | 1 | 0 | 0.1218695  | 0          | 1   | 4 | 0.1218695  | 1.26272838 |            |
| chr2 | 135301967 | 135362917 | 60951  | 1  | 1 | 0 | 0.1218695  | 0          | 1   | 3 | 0.1218695  | 0.93173516 |            |
| chr2 | 135362917 | 135406655 | 43739  | 2  | 1 | 0 | 0.1218695  | 0          | 1   | 4 | 0.1218695  | 1.26272838 |            |
| chr2 | 135406655 | 135596235 | 189581 | 3  | 1 | 0 | 0.1218695  | 0          | 1   | 3 | 0.1218695  | 0.93173516 |            |
| chr2 | 135596235 | 135619518 | 23284  | 1  | 1 | 0 | 0.1218695  | 0          | 1   | 2 | 0.1218695  | 0.61140001 |            |
| chr2 | 135619518 | 135619565 | 48     | 1  | 1 | 0 | 0.1218695  | 0          | 1   | 6 | 0.1218695  | 1.95986592 |            |
| chr2 | 135619565 | 135737566 | 118002 | 2  | 1 | 0 | 0.1218695  | 0          | 1   | 4 | 0.1218695  | 1.26272838 |            |
| chr2 | 135737566 | 135805998 | 68433  | 4  | 1 | 0 | 0.05404976 | 0          | 2   | 5 | 0.30102999 | 1.60515106 |            |
| chr2 | 135805998 | 135910526 | 104529 | 3  | 1 | 0 | 0.05404976 | 0          | 2   | 6 | 0.30102999 | 1.95986592 |            |
| chr2 | 135910526 | 135941282 | 30757  | 2  | 2 | 0 | 0.05404976 | 0.01053119 | 2   | 6 | 0.30102999 | 0.91219088 |            |
| chr2 | 135941282 | 136033293 | 92012  | 3  | 1 | 1 | 0.05404976 | 0.00204627 | 2   | 6 | 0.30102999 | 1.31360226 |            |
| chr2 | 136033293 | 136071347 | 38055  | 1  | 1 | 0 | 0.05404976 | 0          | 2   | 5 | 0.30102999 | 1.60515106 |            |
| chr2 | 136071347 | 136197033 | 125687 | 3  | 1 | 0 | 0.05404976 | 0          | 2   | 4 | 0.30102999 | 1.26272838 |            |
| chr2 | 136197033 | 136700985 | 503953 | 16 | 0 | 0 | 0.05404976 | 0          | 2   | 5 | 0.30102999 | 1.60515106 |            |
| chr2 | 136700985 | 136803071 | 102087 | 4  | 1 | 0 | 0.02438896 | 0          | 3   | 5 | 0.51676182 | 1.60515106 |            |
| chr2 | 136803071 | 136803130 | 60     | 1  | 2 | 0 | 0.02438896 | 0.02162467 | 3   | 5 | 0.51676182 | 0.68214471 |            |
| chr2 | 136803130 | 136871993 | 68864  | 1  | 1 | 2 | 0.05404976 | 0.02162467 | 2   | 5 | 0.30102999 | 0.68214471 |            |
| chr2 | 136871993 | 136888233 | 16241  | 2  | 3 | 0 | 0.05404976 | 0.05670724 | 2   | 5 | 0.30102999 | 0.45545077 |            |
| chr2 | 136888233 | 137082556 | 194324 | 1  | 1 | 2 | 0.1218695  | 0.02162467 | 1   | 5 | 0.1218695  | 0.68214471 |            |
| chr2 | 137082556 | 137381168 | 298613 | 4  | 1 | 3 | 0.1218695  | 0.05670724 | 2   | 5 | 0.1218695  | 0.45545077 |            |
| chr2 | 137381168 | 137419643 | 38476  | 2  | 1 | 3 | 0.05404976 | 0.05670724 | 2   | 5 | 0.30102999 | 0.45545077 |            |
| chr2 | 137419643 | 137668681 | 249039 | 3  | 1 | 2 | 0.05404976 | 0.02162467 | 2   | 5 | 0.30102999 | 0.68214471 |            |
| chr2 | 137668681 | 137785796 | 117116 | 2  | 1 | 2 | 0.1218695  | 0.02162467 | 1   | 5 | 0.1218695  | 0.68214471 |            |
| chr2 | 137785796 | 137785855 | 60     | 1  | 2 | 0 | 0.05404976 | 0.02162467 | 2   | 5 | 0.30102999 | 0.68214471 |            |
| chr2 | 137785855 | 138227914 | 442060 | 10 | 1 | 2 | 0.1218695  | 0.02162467 | 1   | 5 | 0.1218695  | 0.68214471 |            |
| chr2 | 138227914 | 138485012 | 257099 | 4  | 0 | 2 | 0.0429175  | 0.0429175  | 4   | 1 | 0.30102999 | 0.47744371 |            |
| chr2 | 138485012 | 138581222 | 96211  | 2  | 0 | 2 | 0          | 0.02162467 | 2   | 5 | 0.30102999 | 0.68214471 |            |
| chr2 | 138581222 | 138581281 | 60     | 1  | 0 | 2 | 0          | 0.02162467 | 2   | 5 | 0.61140001 | 0.68214471 |            |
| chr2 | 138581281 | 138771527 | 190247 | 4  | 0 | 2 | 0          | 0.0429175  | 4   | 4 | 0.30102999 | 0.47744371 |            |
| chr2 | 138771527 | 139261374 | 489848 | 4  | 0 | 2 | 0          | 0.08289318 | 1   | 3 | 0.30102999 | 0.30102999 |            |
| chr2 | 139261374 | 139295544 | 34171  | 2  | 0 | 2 | 0          | 0.0429175  | 1   | 4 | 0.30102999 | 0.47744371 |            |
| chr2 | 139295544 | 139539847 | 248404 | 4  | 1 | 1 | 0          | 0.02438896 | 3   | 3 | 0.30102999 | 0.51676182 |            |
| chr2 | 139539847 | 139632425 | 88479  | 0  | 0 | 0 | 0          | 0          | 1   | 1 | 0.30102999 | 0.30102999 |            |
| chr2 | 139632425 | 140151339 | 518951 | 2  | 0 | 0 | 0          | 0          | 0   | 1 | 0          | 0.30102999 | 0.30102999 |
| chr2 | 140151339 | 140151398 | 60     | 1  | 1 | 0 | 0.1575501  | 0.1575501  | 2   | 1 | 0.30102999 | 0.1575501  |            |
| chr2 | 140151398 | 140625834 | 474437 | 4  | 0 | 1 | 0          | 0.1218695  | 1   | 1 | 0.30102999 | 0.1218695  |            |
| chr2 | 140625834 | 140930169 | 304336 | 3  | 0 | 2 | 0          | 0.08289318 | 1   | 3 | 0.30102999 | 0.30102999 |            |
| chr2 | 140930169 | 141015240 | 85072  | 2  | 0 | 2 | 0          | 0.02162467 | 1   | 5 | 0.30102999 | 0.68214471 |            |
| chr2 | 141015240 | 141094413 | 79174  | 2  | 0 | 2 | 0          | 0.0429175  | 4   | 4 | 0.30102999 | 0.47744371 |            |
| chr2 | 141094413 | 141169679 | 75267  | 2  | 0 | 2 | 0          | 0.02162467 | 1   | 5 | 0.30102999 | 0.68214471 |            |
| chr2 | 141169679 | 141232845 | 63167  | 1  | 2 | 0 | 0.0429175  | 0.0429175  | 4   | 4 | 0.30102999 | 0.47744371 |            |
| chr2 | 141232845 | 141333794 | 100950 | 2  | 0 | 2 | 0          | 0.08289318 | 1   | 3 | 0.30102999 | 0.30102999 |            |
| chr2 | 141333794 | 141445879 | 112086 | 3  | 0 | 2 | 0          | 0.0429175  | 4   | 4 | 0.61140001 | 0.47744371 |            |
| chr2 | 141445879 | 141533612 | 87734  | 2  | 0 | 1 | 0          | 0.01091641 | 2   | 4 | 0.61140001 | 0.76005302 |            |
| chr2 | 141533612 | 141533671 | 60     | 1  | 2 | 0 | 0.02162467 | 0.02162467 | 5   | 5 | 0.61140001 | 0.68214471 |            |
| chr2 | 141533671 | 141625347 | 91677  | 2  | 0 | 2 | 0          | 0.0429175  | 4   | 4 | 0.61140001 | 0.47744371 |            |
| chr2 | 141625347 | 141660774 | 35428  | 2  | 0 | 2 | 0          | 0.0429175  | 3   | 4 | 0.93173516 | 0.47744371 |            |
| chr2 | 141660774 | 141660833 | 60     | 1  | 0 | 2 | 0          | 0.00493743 | 3   | 7 | 0.93173516 | 1.16581773 |            |
| chr2 | 141660833 | 141769326 | 108494 | 2  | 0 | 2 | 0          | 0.01053319 | 3   | 6 | 0.93173516 | 0.91219088 |            |
| chr2 | 141769326 | 142167696 | 398371 | 9  | 0 | 2 | 0          | 0.00493743 | 3   | 7 | 0.93173516 | 1.16581773 |            |
| chr2 | 142167696 | 142287243 | 119548 | 2  | 0 | 2 | 0          | 0.01053319 | 3   | 6 | 0.93173516 | 0.91219088 |            |
| chr2 | 142287243 | 142319133 | 31891  | 2  | 0 | 2 | 0.02438896 | 0.01053319 | 3   | 6 | 0.51676182 | 0.91219088 |            |
| chr2 | 142319133 | 142480686 | 161554 | 3  | 1 | 1 | 0.02438896 | 0.01091641 | 3   | 4 | 0.51676182 | 0.76005302 |            |
| chr2 | 142480686 | 142567937 | 87252  | 2  | 0 | 1 | 0          | 0.01091641 | 3   | 4 | 0.93173516 | 0.76005302 |            |
| chr2 | 142567937 | 142645376 | 77440  | 3  | 0 | 1 | 0.02438896 | 0.01091641 | 3   | 4 | 0.51676182 | 0.76005302 |            |
| chr2 | 142645376 | 142805609 | 160234 | 4  | 0 | 1 | 0          | 0.01091641 | 3   | 4 | 0.93173516 | 0.76005302 |            |
| chr2 | 142805609 | 142899918 | 94310  | 2  | 0 | 1 | 0          | 0.05404976 | 3   | 2 | 0.93173516 | 0.30102999 |            |
| chr2 | 142899918 | 142899977 | 60     | 1  | 0 | 1 | 0          | 0.02438896 | 3   | 3 | 0.93173516 | 0.51676182 |            |
| chr2 | 142899977 | 142995636 | 95660  | 1  | 0 | 1 | 0          | 0.05404976 | 2   | 2 | 0.61140001 | 0.30102999 |            |
| chr2 | 142995636 | 143174405 | 17870  | 2  | 1 | 1 | 0.05404976 | 0.05404976 | 2</ |   |            |            |            |

|      |           |           |        |    |   |            |            |            |   |   |   |            |            |
|------|-----------|-----------|--------|----|---|------------|------------|------------|---|---|---|------------|------------|
| chr2 | 147935002 | 148186210 | 251209 | 2  | 0 | 0          | 0          | 0          | 0 | 0 | 2 | 0          | 0.61140001 |
| chr2 | 148186210 | 148372337 | 186128 | 3  | 2 | 0          | 0.30102999 | 0          | 0 | 1 | 2 | 0          | 0.61140001 |
| chr2 | 148372337 | 148602463 | 230127 | 3  | 0 | 0          | 0.30102999 | 0          | 0 | 1 | 4 | 0.05404976 | 1.26272838 |
| chr2 | 148602463 | 148657041 | 54579  | 2  | 2 | 0          | 0.30102999 | 0          | 0 | 1 | 3 | 0.05404976 | 0.93173516 |
| chr2 | 148657041 | 148879681 | 222641 | 6  | 2 | 0          | 0.30102999 | 0          | 0 | 1 | 4 | 0.05404976 | 1.26272838 |
| chr2 | 148879681 | 149002435 | 122755 | 2  | 2 | 0          | 0.30102999 | 0          | 0 | 1 | 3 | 0.05404976 | 0.93173516 |
| chr2 | 149002435 | 149002494 | 60     | 1  | 2 | 0          | 0.30102999 | 0          | 0 | 1 | 5 | 0.05404976 | 1.60515106 |
| chr2 | 149002494 | 149228395 | 225902 | 6  | 2 | 0          | 0.30102999 | 0          | 0 | 1 | 4 | 0.05404976 | 1.26272838 |
| chr2 | 149228395 | 149263045 | 34651  | 1  | 1 | 0          | 0.1218695  | 0          | 0 | 1 | 4 | 0.1218695  | 1.26272838 |
| chr2 | 149263045 | 149263104 | 60     | 1  | 1 | 0          | 0.1218695  | 0          | 0 | 1 | 5 | 0.1218695  | 1.60515106 |
| chr2 | 149263104 | 149378946 | 115843 | 1  | 1 | 0          | 0.1218695  | 0          | 0 | 1 | 4 | 0.1218695  | 1.26272838 |
| chr2 | 149378946 | 149447756 | 68811  | 3  | 2 | 0          | 0.30102999 | 0          | 0 | 1 | 4 | 0.05404976 | 1.26272838 |
| chr2 | 149447756 | 149674914 | 227159 | 5  | 2 | 0          | 0.30102999 | 0          | 0 | 1 | 5 | 0.05404976 | 1.60515106 |
| chr2 | 149674914 | 149957905 | 28292  | 6  | 1 | 0          | 0.1218695  | 0          | 0 | 1 | 4 | 0.1218695  | 1.26272838 |
| chr2 | 149957905 | 149987423 | 29519  | 2  | 1 | 0          | 0.30102999 | 0          | 0 | 1 | 4 | 0.05404976 | 1.26272838 |
| chr2 | 149987423 | 150147521 | 160099 | 3  | 1 | 0          | 0.1218695  | 0          | 0 | 1 | 4 | 0.1218695  | 1.26272838 |
| chr2 | 150147521 | 150147580 | 60     | 1  | 2 | 0          | 0.30102999 | 0          | 0 | 1 | 4 | 0.05404976 | 1.26272838 |
| chr2 | 150147580 | 150305610 | 158031 | 4  | 1 | 0          | 0.1218695  | 0          | 0 | 1 | 4 | 0.1218695  | 1.26272838 |
| chr2 | 150305610 | 150344859 | 39250  | 1  | 1 | 0          | 0.1218695  | 0          | 0 | 1 | 3 | 0.1218695  | 0.93173516 |
| chr2 | 150344859 | 150443172 | 98314  | 2  | 1 | 0          | 0.1218695  | 0          | 0 | 1 | 4 | 0.1218695  | 1.26272838 |
| chr2 | 150443172 | 150443231 | 60     | 1  | 1 | 0          | 0.1218695  | 0          | 0 | 1 | 5 | 0.1218695  | 1.60515106 |
| chr2 | 150443231 | 150493583 | 50353  | 1  | 1 | 0          | 0.1218695  | 0          | 0 | 1 | 3 | 0.1218695  | 0.93173516 |
| chr2 | 150493583 | 150493642 | 60     | 1  | 1 | 0          | 0.1218695  | 0          | 0 | 1 | 3 | 0.1218695  | 1.60515106 |
| chr2 | 150493642 | 150763297 | 269656 | 3  | 0 | 0          | 0          | 0          | 0 | 0 | 3 | 0          | 0.93173516 |
| chr2 | 150763297 | 151128706 | 365410 | 2  | 0 | 0          | 0          | 0          | 0 | 0 | 2 | 0          | 0.61140001 |
| chr2 | 151128706 | 151902664 | 109734 | 1  | 1 | 0          | 0.30102999 | 0          | 0 | 0 | 0 | 0          | 0          |
| chr2 | 151902664 | 152084100 | 181437 | 3  | 1 | 0          | 0.30102999 | 0          | 0 | 0 | 1 | 0          | 0.30102999 |
| chr2 | 152084100 | 152226633 | 142534 | 2  | 1 | 0          | 0.30102999 | 0          | 0 | 0 | 0 | 0          | 0          |
| chr2 | 152226633 | 152278253 | 51621  | 2  | 1 | 0          | 0.1218695  | 0          | 0 | 1 | 1 | 0.1218695  | 0.30102999 |
| chr2 | 152278253 | 152326676 | 48424  | 2  | 1 | 0          | 0.1218695  | 0          | 0 | 1 | 2 | 0.1218695  | 0.61140001 |
| chr2 | 152326676 | 152546197 | 219522 | 6  | 1 | 0          | 0.1218695  | 0          | 0 | 1 | 0 | 0.1218695  | 0          |
| chr2 | 152546197 | 152578867 | 32671  | 2  | 1 | 0          | 0.1218695  | 0          | 0 | 1 | 1 | 0.1218695  | 0.30102999 |
| chr2 | 152578867 | 152641430 | 62564  | 2  | 1 | 0          | 0.05404976 | 0          | 0 | 2 | 1 | 0.30102999 | 0.30102999 |
| chr2 | 152641430 | 152727396 | 85967  | 4  | 2 | 0          | 0.1575501  | 0          | 0 | 2 | 1 | 0.1575501  | 0.30102999 |
| chr2 | 152727396 | 153029854 | 302459 | 6  | 1 | 0          | 0.05404976 | 0          | 0 | 2 | 1 | 0.30102999 | 0.30102999 |
| chr2 | 153029854 | 153243343 | 213490 | 1  | 1 | 0          | 0.1218695  | 0          | 0 | 1 | 1 | 0.1218695  | 0.30102999 |
| chr2 | 153243343 | 153374551 | 131209 | 3  | 1 | 0          | 0.05404976 | 0          | 0 | 2 | 1 | 0.30102999 | 0.30102999 |
| chr2 | 153374551 | 153374610 | 60     | 1  | 2 | 0          | 0.1575501  | 0          | 0 | 2 | 2 | 0.1575501  | 0.61140001 |
| chr2 | 153374610 | 153503455 | 128846 | 2  | 2 | 0          | 0.1575501  | 0          | 0 | 2 | 1 | 0.1575501  | 0.30102999 |
| chr2 | 153503455 | 153577066 | 73612  | 3  | 1 | 0          | 0.1218695  | 0          | 0 | 1 | 1 | 0.1218695  | 0.30102999 |
| chr2 | 153577066 | 153633955 | 56890  | 2  | 2 | 0          | 0.30102999 | 0          | 0 | 1 | 1 | 0.05404976 | 0.30102999 |
| chr2 | 153633955 | 153634014 | 60     | 1  | 2 | 0          | 0.1575501  | 0          | 0 | 2 | 1 | 0.1575501  | 0.30102999 |
| chr2 | 153634014 | 153741336 | 107323 | 1  | 2 | 0          | 0.30102999 | 0          | 0 | 1 | 1 | 0.05404976 | 0.30102999 |
| chr2 | 153741336 | 154013041 | 271706 | 2  | 0 | 0          | 0.61140001 | 0          | 0 | 0 | 1 | 0          | 0.30102999 |
| chr2 | 154013041 | 154013100 | 60     | 1  | 2 | 0          | 0.30102999 | 0          | 0 | 2 | 2 | 0.05404976 | 0.61140001 |
| chr2 | 154013100 | 154164613 | 151514 | 1  | 2 | 0          | 0.61140001 | 0          | 0 | 1 | 0 | 0.30102999 | 0          |
| chr2 | 154164613 | 154333871 | 169259 | 4  | 2 | 0          | 0.61140001 | 0          | 0 | 2 | 2 | 0.61140001 | 0.61140001 |
| chr2 | 154333871 | 154338522 | 4652   | 0  | 0 | 0          | 0.30102999 | 0          | 0 | 1 | 2 | 0.05404976 | 0.61140001 |
| chr2 | 154338522 | 154538832 | 200311 | 2  | 2 | 0          | 0.61140001 | 0          | 0 | 2 | 2 | 0.61140001 | 0.61140001 |
| chr2 | 154538832 | 154538891 | 60     | 1  | 2 | 1          | 0.61140001 | 0.05404976 | 0 | 2 | 2 | 0.30102999 | 0.61140001 |
| chr2 | 154538891 | 154747912 | 209022 | 2  | 2 | 0          | 0.61140001 | 0          | 0 | 0 | 2 | 0.61140001 | 0.61140001 |
| chr2 | 154747912 | 154938385 | 190474 | 5  | 3 | 0          | 0.93173516 | 0          | 0 | 2 | 0 | 0.61140001 | 0.61140001 |
| chr2 | 154938385 | 154938444 | 60     | 1  | 3 | 0          | 0.93173516 | 0          | 0 | 3 | 0 | 0.93173516 | 0.61140001 |
| chr2 | 154938444 | 155138630 | 200187 | 4  | 3 | 0          | 0.93173516 | 0          | 0 | 2 | 0 | 0.61140001 | 0.61140001 |
| chr2 | 155138630 | 155258410 | 119781 | 3  | 3 | 1          | 0.93173516 | 0.05404976 | 0 | 2 | 2 | 0.30102999 | 0.61140001 |
| chr2 | 155258410 | 155398098 | 139689 | 2  | 3 | 0          | 0.93173516 | 0          | 0 | 0 | 2 | 0.61140001 | 0.61140001 |
| chr2 | 155398098 | 155398157 | 60     | 1  | 4 | 1          | 1.26272838 | 0.05404976 | 0 | 2 | 2 | 0.30102999 | 0.61140001 |
| chr2 | 155398157 | 155711313 | 313157 | 6  | 3 | 1          | 0.93173516 | 0.05404976 | 0 | 2 | 2 | 0.30102999 | 0.61140001 |
| chr2 | 155711313 | 155859143 | 147831 | 2  | 3 | 1          | 0.93173516 | 0.1218695  | 0 | 1 | 0 | 0.1218695  | 0.61140001 |
| chr2 | 155859143 | 155859202 | 60     | 1  | 1 | 0.93173516 | 0.05404976 | 0          | 0 | 2 | 2 | 0.30102999 | 0.61140001 |
| chr2 | 155859202 | 156109766 | 250565 | 3  | 2 | 0          | 0.61140001 | 0          | 0 | 1 | 0 | 0.30102999 | 0.61140001 |
| chr2 | 156109766 | 156109825 | 60     | 1  | 3 | 0          | 0.93173516 | 0          | 0 | 1 | 0 | 0.30102999 | 0.61140001 |
| chr2 | 156109825 | 156338297 | 228473 | 3  | 2 | 0          | 0.61140001 | 0          | 0 | 1 | 0 | 0.30102999 | 0.61140001 |
| chr2 | 156338297 | 156522754 | 184458 | 1  | 2 | 0          | 0.61140001 | 0          | 0 | 0 | 1 | 0          | 0.30102999 |
| chr2 | 156522754 | 156522813 | 60     | 1  | 3 | 1          | 0.51676182 | 0          | 0 | 1 | 1 | 0.2438896  | 0.1218695  |
| chr2 | 156522813 | 156761458 | 238646 | 1  | 2 | 0          | 0.30102999 | 0.30102999 | 0 | 0 | 0 | 0.05404976 | 0          |
| chr2 | 156761458 | 156882590 | 121133 | 1  | 2 | 0          | 0.30102999 | 0          | 0 | 0 | 0 | 0.05404976 | 0          |
| chr2 | 156882590 | 156882649 | 60     | 1  | 2 | 0          | 0.30102999 | 0          | 0 | 1 | 1 | 0.05404976 | 0.30102999 |
| chr2 | 156882649 | 156889242 | 106594 | 1  | 2 | 0          | 0.30102999 | 0          | 0 | 1 | 0 | 0.05404976 | 0          |
| chr2 | 156889242 | 157181872 | 192631 | 2  | 2 | 0          | 0.61140001 | 0          | 0 | 0 | 0 | 0          | 0          |
| chr2 | 157181872 | 157214974 | 33103  | 2  | 0 | 0          | 0.30102999 | 0          | 0 | 1 | 0 | 0.05404976 | 0          |
| chr2 | 157214974 | 157353001 | 138028 | 2  | 2 | 0          | 0.61140001 | 0          | 0 | 0 | 0 | 0          | 0          |
| chr2 | 157353001 | 157353060 | 60     | 1  | 2 | 0          | 0.61140001 | 0          | 0 | 1 | 0 | 0          | 0.30102999 |
| chr2 | 157353060 | 157511681 | 158622 | 3  | 2 | 0          | 0.61140001 | 0          | 0 | 0 | 0 | 0          | 0          |
| chr2 | 157511681 | 157511740 | 60     | 1  | 2 | 0          | 0.30102999 | 0          | 0 | 1 | 1 | 0.05404976 | 0.30102999 |
| chr2 | 157511740 | 157792260 | 280521 | 2  | 2 | 0          | 0.61140001 | 0          | 0 | 0 | 1 | 0          | 0.30102999 |
| chr2 | 157792260 | 15792319  | 60     | 1  | 2 | 0          | 0.30102999 | 0          | 0 | 1 | 1 | 0.05404976 | 0.30102999 |
| chr2 | 15792319  | 158179678 | 387360 | 5  | 2 | 0          | 0.61140001 | 0          | 0 | 0 | 1 | 0.30102999 | 0.61140001 |
| chr2 | 158179678 | 158179737 | 60     | 1  | 2 | 0          | 0.30102999 | 0          | 0 | 1 | 2 | 0.05404976 | 0.61140001 |
| chr2 | 158179737 | 158385820 | 206084 | 2  | 1 | 0          | 0.30102999 | 0          | 0 | 1 | 0 | 0.30102999 | 0.61140001 |
| chr2 | 158385820 | 158476521 | 90702  | 4  | 1 | 0          | 0.30102999 | 0          | 0 | 0 | 2 | 0.61140001 | 0.61140001 |
| chr2 | 158476521 | 158622675 | 146155 | 2  | 1 | 0          | 0.30102999 | 0          | 0 | 1 | 0 | 0.30102999 | 0.61140001 |
| chr2 | 158622675 | 159150071 | 527397 | 13 | 2 | 0          | 0.30102999 | 0          | 0 | 1 | 1 | 0.05404976 | 0.30102999 |
| chr2 | 159150071 | 159150130 | 60     | 1  | 2 | 0          | 0.30102999 | 0          | 0 | 1 | 2 | 0.05404976 | 0.61140001 |
| chr2 | 159150130 | 159246300 | 96171  | 2  | 2 | 0          | 0.30102999 | 0          | 0 | 1 | 1 | 0.05404976 | 0.61140001 |
| chr2 | 159246300 | 159246359 | 60     | 1  | 2 | 0          | 0.30102999 | 0          | 0 | 1 | 3 | 0.05404976 | 0.93173516 |
| chr2 | 159246359 | 159344553 | 98195  | 2  | 1 | 0          | 0.1218695  | 0          | 0 | 2 | 2 | 0.1218695  | 0.61140001 |
| chr2 | 159344553 | 159421330 | 76778  | 2  | 2 | 0          | 0.30102999 | 0          | 0 | 1 | 2 | 0.05404976 | 0.61140001 |
| chr2 | 159421330 | 159655906 | 234577 | 7  | 2 | 0          | 0.30102999 | 0          | 0 | 1 | 3 | 0.05404976 | 0.93173516 |
| chr2 | 159655906 | 159844069 | 188164 | 2  | 2 | 0          | 0.30102999 | 0          | 0 | 2 | 2 | 0.05404976 | 0.61140001 |
| chr2 | 159844069 | 159920859 | 76791  | 3  | 2 | 0          | 0.1575501  | 0          | 0 | 2 | 2 | 0.1575501  | 0.61140001 |
| chr2 | 159920859 | 159920918 | 60     | 1  | 3 | 1          | 0.30102999 | 0.05404976 | 0 | 2 | 2 | 0.08289318 | 0.301029   |

|      |           |           |        |    |   |   |            |            |   |   |            |            |
|------|-----------|-----------|--------|----|---|---|------------|------------|---|---|------------|------------|
| chr2 | 163483074 | 163562260 | 79187  | 3  | 2 | 1 | 0.30102999 | 0.02438896 | 1 | 3 | 0.05404976 | 0.51676182 |
| chr2 | 163562260 | 163744864 | 182605 | 3  | 2 | 0 | 0.30102999 | 0          | 1 | 3 | 0.05404976 | 0.93173516 |
| chr2 | 163744864 | 163875903 | 131040 | 1  | 1 | 0 | 0.1218695  | 0          | 1 | 2 | 0.1218695  | 0.61140001 |
| chr2 | 163875903 | 163875962 | 60     | 1  | 1 | 2 | 0.1218695  | 0.1575501  | 1 | 2 | 0.1218695  | 0.1575501  |
| chr2 | 163875962 | 164405692 | 529731 | 3  | 0 | 1 | 0          | 0.05404976 | 0 | 2 | 0          | 0.30102999 |
| chr2 | 164405692 | 164405751 | 60     | 1  | 1 | 1 | 0.30102999 | 0.05404976 | 0 | 2 | 0          | 0.30102999 |
| chr2 | 164405751 | 164640805 | 235055 | 5  | 0 | 1 | 0          | 0.05404976 | 0 | 2 | 0          | 0.30102999 |
| chr2 | 164640805 | 164640864 | 60     | 1  | 0 | 2 | 0          | 0.1575501  | 0 | 2 | 0          | 0.1575501  |
| chr2 | 164640864 | 165053775 | 412912 | 3  | 0 | 0 | 0          | 0.05404976 | 0 | 2 | 0          | 0.30102999 |
| chr2 | 165053775 | 165173679 | 119905 | 2  | 1 | 1 | 0.1218695  | 0.05404976 | 1 | 2 | 0.1218695  | 0.30102999 |
| chr2 | 165173679 | 165429580 | 255902 | 5  | 1 | 1 | 0.30102999 | 0.05404976 | 0 | 2 | 0          | 0.30102999 |
| chr2 | 165429580 | 165755330 | 325751 | 7  | 0 | 1 | 0          | 0.05404976 | 0 | 2 | 0          | 0.30102999 |
| chr2 | 165755330 | 165943988 | 188659 | 4  | 0 | 1 | 0.30102999 | 0.05404976 | 0 | 2 | 0          | 0.30102999 |
| chr2 | 165943988 | 166019786 | 75799  | 4  | 3 | 1 | 0.93173516 | 0.05404976 | 0 | 2 | 0          | 0.30102999 |
| chr2 | 166019786 | 166198780 | 178995 | 5  | 3 | 1 | 0.51676182 | 0.05404976 | 1 | 2 | 0.02438896 | 0.30102999 |
| chr2 | 166198780 | 166246100 | 47321  | 3  | 3 | 2 | 0.51676182 | 0.1575501  | 1 | 2 | 0.02438896 | 0.1575501  |
| chr2 | 166246100 | 166429058 | 182959 | 3  | 1 | 2 | 0.30102999 | 0.1575501  | 0 | 2 | 0          | 0.1575501  |
| chr2 | 166429058 | 166478707 | 49650  | 1  | 1 | 1 | 0.30102999 | 0.05404976 | 0 | 2 | 0          | 0.30102999 |
| chr2 | 166478707 | 166519701 | 40956  | 2  | 3 | 1 | 0.93173516 | 0.05404976 | 0 | 2 | 0          | 0.30102999 |
| chr2 | 166519701 | 166802060 | 282360 | 6  | 3 | 0 | 0          | 0.93173516 | 0 | 2 | 0          | 0.61140001 |
| chr2 | 166802060 | 166903501 | 191442 | 5  | 0 | 1 | 0.93173516 | 0.05404976 | 0 | 2 | 0          | 0.30102999 |
| chr2 | 166903501 | 166993560 | 60     | 1  | 3 | 2 | 0.93173516 | 0.08289318 | 0 | 3 | 0          | 0.30102999 |
| chr2 | 166993560 | 167099556 | 105997 | 2  | 1 | 0 | 0.30102999 | 0          | 0 | 2 | 0          | 0.61140001 |
| chr2 | 167099556 | 167099615 | 60     | 1  | 1 | 1 | 0.30102999 | 0.02438896 | 0 | 3 | 0          | 0.51676182 |
| chr2 | 167099615 | 167138284 | 38670  | 1  | 1 | 0 | 0.30102999 | 0          | 0 | 3 | 0          | 0.93173516 |
| chr2 | 167138284 | 167182965 | 44682  | 2  | 1 | 0 | 0.61140001 | 0          | 0 | 3 | 0          | 0.93173516 |
| chr2 | 167182965 | 167224787 | 41823  | 2  | 3 | 0 | 0.93173516 | 0          | 0 | 3 | 0          | 0.93173516 |
| chr2 | 167224787 | 167322057 | 97271  | 3  | 2 | 0 | 0.61140001 | 0          | 0 | 3 | 0          | 0.93173516 |
| chr2 | 167322057 | 167373565 | 51509  | 2  | 2 | 0 | 0.61140001 | 0          | 0 | 2 | 0          | 0.61140001 |
| chr2 | 167373565 | 167373624 | 60     | 1  | 2 | 0 | 0.61140001 | 0          | 0 | 3 | 0          | 0.93173516 |
| chr2 | 167373624 | 167602904 | 229281 | 1  | 1 | 0 | 0.30102999 | 0          | 0 | 3 | 0          | 0.93173516 |
| chr2 | 167602904 | 167602963 | 60     | 1  | 2 | 0 | 0.61140001 | 0          | 0 | 3 | 0          | 0.93173516 |
| chr2 | 167602963 | 167823075 | 220113 | 3  | 1 | 0 | 0.30102999 | 0          | 0 | 3 | 0          | 0.93173516 |
| chr2 | 167823075 | 167823134 | 60     | 1  | 3 | 0 | 0.93173516 | 0          | 0 | 3 | 0          | 0.93173516 |
| chr2 | 167823134 | 168220382 | 397249 | 8  | 2 | 0 | 0.61140001 | 0          | 0 | 3 | 0          | 0.93173516 |
| chr2 | 168220382 | 168481627 | 261246 | 2  | 0 | 0 | 0.61140001 | 0          | 0 | 2 | 0          | 0.61140001 |
| chr2 | 168481627 | 168610662 | 129036 | 2  | 2 | 0 | 0.30102999 | 0          | 1 | 2 | 0.05404976 | 0.61140001 |
| chr2 | 168610662 | 168689947 | 79286  | 1  | 1 | 0 | 0.30102999 | 0          | 0 | 2 | 0          | 0.61140001 |
| chr2 | 168689947 | 168811070 | 121124 | 1  | 0 | 0 | 0.30102999 | 0          | 0 | 3 | 0          | 0.93173516 |
| chr2 | 168811070 | 168821181 | 10112  | 2  | 2 | 0 | 0.30102999 | 0          | 1 | 3 | 0.05404976 | 0.93173516 |
| chr2 | 168821181 | 168920871 | 99691  | 2  | 1 | 0 | 0.1218695  | 0          | 1 | 3 | 0.1218695  | 0.93173516 |
| chr2 | 168920871 | 168986197 | 65327  | 1  | 1 | 0 | 0.1218695  | 0          | 1 | 2 | 0.1218695  | 0.61140001 |
| chr2 | 168986197 | 169038537 | 52341  | 2  | 1 | 1 | 0.1218695  | 0.05404976 | 1 | 2 | 0.1218695  | 0.30102999 |
| chr2 | 169038537 | 169225746 | 187210 | 2  | 1 | 1 | 0.30102999 | 0.05404976 | 0 | 0 | 2          | 0.30102999 |
| chr2 | 169225746 | 169315509 | 89764  | 2  | 1 | 1 | 0.30102999 | 0.01091641 | 0 | 4 | 0          | 0.76005302 |
| chr2 | 169315509 | 169370853 | 55345  | 1  | 1 | 0 | 0.30102999 | 0          | 0 | 2 | 0          | 0.61140001 |
| chr2 | 169370853 | 169370912 | 60     | 1  | 0 | 0 | 0.30102999 | 0          | 0 | 3 | 0          | 0.93173516 |
| chr2 | 169370912 | 169418459 | 47548  | 1  | 1 | 0 | 0.30102999 | 0          | 0 | 2 | 0          | 0.61140001 |
| chr2 | 169418459 | 169510157 | 91699  | 3  | 1 | 1 | 0.1218695  | 0.05404976 | 0 | 2 | 0.1218695  | 0.30102999 |
| chr2 | 169510157 | 169565350 | 55194  | 2  | 1 | 1 | 0.1218695  | 0.02438896 | 1 | 3 | 0.1218695  | 0.51676182 |
| chr2 | 169565350 | 169565409 | 60     | 1  | 2 | 0 | 0.1218695  | 0.08289318 | 1 | 3 | 0.1218695  | 0.30102999 |
| chr2 | 169565409 | 169625853 | 60445  | 1  | 1 | 1 | 0.1218695  | 0.05404976 | 2 | 2 | 0.1218695  | 0.30102999 |
| chr2 | 169625853 | 169668104 | 42252  | 2  | 1 | 1 | 0.1218695  | 0.1218695  | 1 | 1 | 0.1218695  | 0.1218695  |
| chr2 | 169668104 | 169668161 | 58     | 1  | 1 | 1 | 0.1218695  | 0.05404976 | 1 | 2 | 0.1218695  | 0.30102999 |
| chr2 | 169668161 | 169801430 | 133270 | 6  | 1 | 0 | 0.1218695  | 0          | 1 | 2 | 0.1218695  | 0.61140001 |
| chr2 | 169801430 | 169833157 | 31728  | 2  | 1 | 1 | 0.1218695  | 0.05404976 | 1 | 2 | 0.1218695  | 0.30102999 |
| chr2 | 169833157 | 169869812 | 36656  | 2  | 1 | 1 | 0.1218695  | 0.02438896 | 1 | 3 | 0.1218695  | 0.51676182 |
| chr2 | 169869812 | 169926184 | 56373  | 1  | 1 | 1 | 0.1218695  | 0.05404976 | 1 | 2 | 0.1218695  | 0.30102999 |
| chr2 | 169926184 | 169952036 | 25853  | 2  | 1 | 2 | 0.1218695  | 0.1575501  | 1 | 2 | 0.1218695  | 0.1575501  |
| chr2 | 169952036 | 169952095 | 60     | 1  | 2 | 2 | 0.05404976 | 0.1575501  | 2 | 2 | 0.30102999 | 0.1575501  |
| chr2 | 169952095 | 170042047 | 89953  | 2  | 1 | 2 | 0.1218695  | 0.1575501  | 1 | 2 | 0.1218695  | 0.1575501  |
| chr2 | 170042047 | 170175251 | 133205 | 3  | 1 | 3 | 0.1218695  | 0.30102999 | 1 | 2 | 0.1218695  | 0.08289318 |
| chr2 | 170175251 | 170175302 | 52     | 1  | 1 | 4 | 0.1218695  | 0.47744371 | 1 | 1 | 0.1218695  | 0.04291675 |
| chr2 | 170175302 | 170235905 | 60604  | 1  | 1 | 4 | 0.1218695  | 0.76005302 | 1 | 1 | 0.1218695  | 0.01091641 |
| chr2 | 170235905 | 170339643 | 103739 | 1  | 1 | 3 | 0.1218695  | 0.51676182 | 1 | 1 | 0.1218695  | 0.02438896 |
| chr2 | 170339643 | 170357406 | 27764  | 3  | 1 | 3 | 0.1218695  | 0.17593012 | 1 | 3 | 0.1218695  | 0.08289318 |
| chr2 | 170357406 | 170377468 | 10063  | 2  | 1 | 3 | 0.1218695  | 0.30102999 | 1 | 2 | 0.1218695  | 0.08289318 |
| chr2 | 170377468 | 170394745 | 17278  | 1  | 3 | 3 | 0.1218695  | 0.17593012 | 1 | 3 | 0.1218695  | 0.17593012 |
| chr2 | 170394745 | 170480267 | 85523  | 2  | 2 | 2 | 0.1218695  | 0.08289318 | 1 | 3 | 0.1218695  | 0.30102999 |
| chr2 | 170480267 | 170551718 | 71452  | 2  | 1 | 2 | 0.1218695  | 0.1575501  | 1 | 2 | 0.1218695  | 0.1575501  |
| chr2 | 170551718 | 170656741 | 105024 | 3  | 1 | 2 | 0.1218695  | 0.08289318 | 1 | 3 | 0.1218695  | 0.30102999 |
| chr2 | 170656741 | 170763134 | 106394 | 4  | 1 | 1 | 0.1218695  | 0.05404976 | 0 | 2 | 0.1218695  | 0.30102999 |
| chr2 | 170763134 | 171055858 | 292725 | 9  | 1 | 1 | 0.1218695  | 0.02438896 | 1 | 3 | 0.1218695  | 0.51676182 |
| chr2 | 171055858 | 171172665 | 116808 | 1  | 0 | 0 | 0.1218695  | 0          | 1 | 3 | 0.1218695  | 0.93173516 |
| chr2 | 171172665 | 171376097 | 203433 | 4  | 1 | 0 | 0.1218695  | 0          | 1 | 2 | 0.1218695  | 0.61140001 |
| chr2 | 171376097 | 171376156 | 60     | 1  | 1 | 1 | 0.1218695  | 0.05404976 | 0 | 2 | 0.1218695  | 0.30102999 |
| chr2 | 171376156 | 171509654 | 133499 | 2  | 0 | 0 | 0.1218695  | 0          | 1 | 2 | 0.1218695  | 0.61140001 |
| chr2 | 171509654 | 171559139 | 49486  | 2  | 1 | 0 | 0.30102999 | 0          | 0 | 2 | 0          | 0.61140001 |
| chr2 | 171559139 | 171686360 | 127222 | 3  | 0 | 0 | 0.1218695  | 0          | 1 | 2 | 0.1218695  | 0.61140001 |
| chr2 | 171686360 | 171843871 | 157512 | 4  | 1 | 1 | 0.1218695  | 0.05404976 | 1 | 2 | 0.1218695  | 0.30102999 |
| chr2 | 171843871 | 171949550 | 105680 | 3  | 1 | 0 | 0.1218695  | 0          | 1 | 2 | 0.1218695  | 0.61140001 |
| chr2 | 171949550 | 171949609 | 60     | 1  | 2 | 1 | 0.30102999 | 0.02438896 | 1 | 3 | 0.05404976 | 0.51676182 |
| chr2 | 171949609 | 171975803 | 26195  | 0  | 0 | 0 | 0.30102999 | 0          | 1 | 3 | 0.05404976 | 0.93173516 |
| chr2 | 171975803 | 171975862 | 60     | 1  | 2 | 0 | 0.30102999 | 0          | 1 | 4 | 0.05404976 | 1.26272838 |
| chr2 | 171975862 | 172083377 | 107516 | 2  | 0 | 0 | 0.30102999 | 0          | 1 | 2 | 0.05404976 | 0.61140001 |
| chr2 | 172083377 | 172083436 | 60     | 1  | 3 | 2 | 0.30102999 | 0          | 1 | 3 | 0.05404976 | 0.93173516 |
| chr2 | 172083436 | 172285743 | 202308 | 4  | 2 | 0 | 0.30102999 | 0          | 1 | 2 | 0.05404976 | 0.61140001 |
| chr2 | 172285743 | 172285802 | 60     | 1  | 2 | 0 | 0.30102999 | 0          | 1 | 3 | 0.05404976 | 0.93173516 |
| chr2 | 172285802 | 172386933 | 101132 | 3  | 2 | 0 | 0.30102999 | 0          | 1 | 1 | 0.05404976 | 0.30102999 |
| chr2 | 172386933 | 172512183 | 125251 | 3  | 2 | 0 | 0.30102999 | 0          | 1 | 2 | 0.05404976 | 0.61140001 |
| chr2 | 172512183 | 172666705 | 154523 | 4  | 2 | 0 | 0.30102999 | 0          | 1 | 3 | 0.05404976 | 0.93173516 |
| chr2 | 172666705 | 172666764 | 60     | 1  | 2 | 0 | 0.30102999 | 0          | 1 | 4 | 0.05404976 | 1.26272838 |
| chr2 | 172666764 | 172750667 | 83904  | 2  | 2 | 0 | 0.30102999 | 0          | 1 | 2 | 0.05404976 | 0.61140001 |
| chr2 | 172750667 | 172782089 | 31423  | 2  | 2 | 0 | 0.30102999 | 0          | 1 | 3 | 0.05404976 | 0.93173516 |
| chr2 | 172782089 | 173295419 | 513331 | 10 | 2 | 0 | 0.         |            |   |   |            |            |

|      |           |           |        |    |   |   |            |            |   |   |            |            |
|------|-----------|-----------|--------|----|---|---|------------|------------|---|---|------------|------------|
| chr2 | 177905315 | 177905374 | 60     | 1  | 2 | 0 | 0.61140001 | 0          | 0 | 3 | 0          | 0.93173516 |
| chr2 | 177905374 | 178081522 | 176149 | 3  | 2 | 0 | 0.61140001 | 0          | 0 | 2 | 0          | 0.61140001 |
| chr2 | 178081522 | 178362416 | 280895 | 10 | 2 | 0 | 0.30102999 | 0          | 1 | 2 | 0.05404976 | 0.61140001 |
| chr2 | 178362416 | 178588622 | 226207 | 7  | 2 | 0 | 0.30102999 | 0          | 1 | 3 | 0.05404976 | 0.93173516 |
| chr2 | 178588622 | 178684998 | 96377  | 3  | 2 | 1 | 0.30102999 | 0.02438896 | 1 | 3 | 0.05404976 | 0.51676182 |
| chr2 | 178684998 | 178936530 | 251533 | 6  | 2 | 0 | 0.30102999 | 0          | 1 | 3 | 0.05404976 | 0.93173516 |
| chr2 | 178936530 | 178970269 | 33740  | 2  | 2 | 1 | 0.30102999 | 0.01091641 | 1 | 4 | 0.05404976 | 0.76005302 |
| chr2 | 178970269 | 178978247 | 7979   | 1  | 2 | 1 | 0.30102999 | 0.02438896 | 1 | 3 | 0.05404976 | 0.51676182 |
| chr2 | 178978247 | 179032111 | 53865  | 2  | 2 | 0 | 0.30102999 | 0          | 1 | 3 | 0.05404976 | 0.93173516 |
| chr2 | 179032111 | 179032170 | 60     | 1  | 2 | 0 | 0.1575501  | 0          | 2 | 3 | 0.1575501  | 0.93173516 |
| chr2 | 179032170 | 179090097 | 57928  | 1  | 2 | 0 | 0.30102999 | 0          | 1 | 3 | 0.05404976 | 0.93173516 |
| chr2 | 179090097 | 179090156 | 60     | 1  | 2 | 1 | 0.30102999 | 0.02438896 | 1 | 3 | 0.05404976 | 0.51676182 |
| chr2 | 179090156 | 179170825 | 80670  | 1  | 2 | 0 | 0.30102999 | 0          | 1 | 3 | 0.05404976 | 0.93173516 |
| chr2 | 179170825 | 179170884 | 60     | 1  | 2 | 0 | 0.1575501  | 0          | 2 | 4 | 0.1575501  | 1.26272838 |
| chr2 | 179170884 | 179369665 | 198782 | 6  | 2 | 0 | 0.30102999 | 0          | 1 | 4 | 0.05404976 | 1.26272838 |
| chr2 | 179369665 | 179499968 | 130304 | 4  | 2 | 0 | 0.30102999 | 0          | 1 | 5 | 0.05404976 | 1.60515106 |
| chr2 | 179499968 | 179536799 | 36832  | 2  | 2 | 1 | 0.30102999 | 0.00478973 | 1 | 5 | 0.05404976 | 1.02643191 |
| chr2 | 179536799 | 179606242 | 69444  | 2  | 2 | 1 | 0.30102999 | 0.01091641 | 1 | 4 | 0.05404976 | 0.76005302 |
| chr2 | 179606242 | 179753424 | 147183 | 6  | 2 | 1 | 0.30102999 | 0.00478973 | 1 | 5 | 0.05404976 | 1.02643191 |
| chr2 | 179753424 | 179753483 | 60     | 1  | 2 | 1 | 0.30102999 | 0.00204627 | 1 | 6 | 0.05404976 | 1.31360226 |
| chr2 | 179753483 | 179794147 | 40665  | 1  | 2 | 1 | 0.30102999 | 0.00478973 | 1 | 5 | 0.05404976 | 1.02643191 |
| chr2 | 179794147 | 179893928 | 99782  | 2  | 2 | 1 | 0.1575501  | 0.00478973 | 2 | 4 | 0.1575501  | 1.02643191 |
| chr2 | 179893928 | 180093318 | 199391 | 4  | 2 | 1 | 0.30102999 | 0.01091641 | 1 | 4 | 0.05404976 | 0.76005302 |
| chr2 | 180093318 | 180117349 | 24032  | 2  | 3 | 1 | 0.51676182 | 0.01091641 | 1 | 4 | 0.2438896  | 0.76005302 |
| chr2 | 180117349 | 180306799 | 189451 | 2  | 2 | 1 | 0.30102999 | 0.01091641 | 1 | 4 | 0.05404976 | 0.76005302 |
| chr2 | 180306799 | 180306858 | 60     | 1  | 2 | 1 | 0.51676182 | 0.01091641 | 1 | 4 | 0.2438896  | 0.76005302 |
| chr2 | 180306858 | 180485698 | 178841 | 6  | 3 | 1 | 0.93173516 | 0.01091641 | 0 | 4 | 0          | 0.76005302 |
| chr2 | 180485698 | 180558211 | 72514  | 2  | 2 | 1 | 0.61140001 | 0.01091641 | 0 | 4 | 0          | 0.76005302 |
| chr2 | 180558211 | 180759301 | 201091 | 5  | 2 | 1 | 0.61140001 | 0.02438896 | 0 | 3 | 0          | 0.51676182 |
| chr2 | 180759301 | 180879667 | 120367 | 3  | 2 | 1 | 0.61140001 | 0.01091641 | 0 | 4 | 0          | 0.76005302 |
| chr2 | 180879667 | 180982972 | 103036 | 1  | 1 | 1 | 0.30102999 | 0.01091641 | 0 | 4 | 0          | 0.76005302 |
| chr2 | 180982972 | 181233021 | 250050 | 1  | 0 | 0 | 0          | 0          | 0 | 3 | 0          | 0.93173516 |
| chr2 | 181233021 | 181400740 | 167720 | 2  | 1 | 0 | 0.30102999 | 0          | 0 | 3 | 0          | 0.93173516 |
| chr2 | 181400740 | 181570071 | 169332 | 1  | 0 | 0 | 0          | 0          | 0 | 2 | 0          | 0.61140001 |
| chr2 | 181570071 | 181725015 | 154945 | 1  | 0 | 0 | 0          | 0          | 0 | 1 | 0          | 0.30102999 |
| chr2 | 181725015 | 181725074 | 60     | 1  | 1 | 0 | 0.30102999 | 0          | 0 | 2 | 0          | 0.61140001 |
| chr2 | 181725074 | 181968837 | 243764 | 4  | 0 | 0 | 0          | 0          | 0 | 2 | 0          | 0.61140001 |
| chr2 | 181968837 | 181968896 | 60     | 1  | 0 | 0 | 0          | 0          | 0 | 3 | 0          | 0.93173516 |
| chr2 | 181968896 | 182201330 | 232435 | 3  | 0 | 0 | 0          | 0          | 0 | 2 | 0          | 0.61140001 |
| chr2 | 182201330 | 182714011 | 512682 | 11 | 0 | 0 | 0          | 0          | 0 | 3 | 0          | 0.93173516 |
| chr2 | 182714011 | 182912528 | 198518 | 7  | 1 | 1 | 0.30102999 | 0.02438896 | 0 | 0 | 6          | 0.51676182 |
| chr2 | 182912528 | 183011861 | 99334  | 3  | 1 | 1 | 0.1218695  | 0.02438896 | 1 | 3 | 0.1218695  | 0.51676182 |
| chr2 | 183011861 | 183387206 | 375346 | 8  | 1 | 0 | 0.1218695  | 0          | 1 | 3 | 0.1218695  | 0.93173516 |
| chr2 | 183387206 | 183643261 | 256056 | 5  | 1 | 0 | 0.30102999 | 0          | 0 | 3 | 0          | 0.93173516 |
| chr2 | 183643261 | 183699541 | 56281  | 3  | 2 | 0 | 0.61140001 | 0          | 0 | 3 | 0          | 0.93173516 |
| chr2 | 183699541 | 183726554 | 27014  | 1  | 1 | 0 | 0.30102999 | 0          | 0 | 3 | 0          | 0.93173516 |
| chr2 | 183726554 | 183894766 | 168213 | 3  | 1 | 0 | 0.30102999 | 0          | 0 | 2 | 0          | 0.61140001 |
| chr2 | 183894766 | 184016273 | 121508 | 3  | 1 | 0 | 0.30102999 | 0          | 0 | 3 | 0          | 0.93173516 |
| chr2 | 184016273 | 184140036 | 123764 | 2  | 0 | 0 | 0.30102999 | 0          | 0 | 2 | 0          | 0.61140001 |
| chr2 | 184140036 | 184330449 | 190414 | 2  | 0 | 0 | 0          | 0          | 0 | 2 | 0          | 0.61140001 |
| chr2 | 184330449 | 184420806 | 90358  | 2  | 1 | 0 | 0.30102999 | 0          | 0 | 2 | 0          | 0.61140001 |
| chr2 | 184420806 | 184420865 | 60     | 1  | 1 | 0 | 0.30102999 | 0          | 0 | 3 | 0          | 0.93173516 |
| chr2 | 184420865 | 184558208 | 137344 | 1  | 1 | 0 | 0.30102999 | 0          | 0 | 2 | 0          | 0.61140001 |
| chr2 | 184558208 | 184737955 | 179748 | 1  | 0 | 0 | 0          | 0          | 0 | 2 | 0          | 0.61140001 |
| chr2 | 184737955 | 184738014 | 60     | 1  | 1 | 0 | 0.30102999 | 0          | 0 | 2 | 0          | 0.61140001 |
| chr2 | 184738014 | 184965883 | 227870 | 2  | 0 | 0 | 0          | 0          | 0 | 2 | 0          | 0.61140001 |
| chr2 | 184965883 | 184965942 | 60     | 1  | 0 | 0 | 0          | 0          | 0 | 4 | 0          | 1.26272838 |
| chr2 | 184965942 | 185234224 | 268283 | 2  | 0 | 0 | 0          | 0          | 0 | 2 | 0          | 0.61140001 |
| chr2 | 185234224 | 185337884 | 103661 | 2  | 0 | 0 | 0          | 0          | 0 | 3 | 0          | 0.93173516 |
| chr2 | 185337884 | 185618130 | 280247 | 7  | 0 | 0 | 0          | 0          | 0 | 2 | 0          | 0.61140001 |
| chr2 | 185618130 | 186094549 | 476420 | 6  | 0 | 0 | 0          | 0          | 0 | 3 | 0          | 0.93173516 |
| chr2 | 186094549 | 186217556 | 123008 | 2  | 1 | 0 | 0.30102999 | 0          | 0 | 3 | 0          | 0.93173516 |
| chr2 | 186217556 | 186474070 | 256515 | 2  | 0 | 0 | 0          | 0          | 0 | 3 | 0          | 0.93173516 |
| chr2 | 186474070 | 186590113 | 116044 | 3  | 1 | 0 | 0.30102999 | 0          | 0 | 3 | 0          | 0.93173516 |
| chr2 | 186590113 | 186612135 | 22023  | 2  | 1 | 0 | 0.61140001 | 0          | 0 | 3 | 0          | 0.93173516 |
| chr2 | 186612135 | 186659631 | 47467  | 2  | 0 | 0 | 0.30102999 | 0          | 0 | 3 | 0          | 0.93173516 |
| chr2 | 186659631 | 186659690 | 60     | 1  | 2 | 0 | 0.61140001 | 0          | 0 | 3 | 0          | 0.93173516 |
| chr2 | 186659690 | 186763813 | 104124 | 1  | 1 | 0 | 0.30102999 | 0          | 0 | 3 | 0          | 0.93173516 |
| chr2 | 186763813 | 186763872 | 60     | 1  | 2 | 0 | 0.30102999 | 0          | 1 | 3 | 0.05404976 | 0.93173516 |
| chr2 | 186763872 | 186899575 | 225704 | 2  | 2 | 0 | 0.30102999 | 0          | 1 | 2 | 0.05404976 | 0.61140001 |
| chr2 | 186899575 | 187303408 | 313834 | 3  | 3 | 0 | 0.51676182 | 0          | 1 | 2 | 0.2438896  | 0.61140001 |
| chr2 | 187303408 | 187367117 | 63710  | 2  | 4 | 0 | 0.76005302 | 0          | 1 | 2 | 0.01091641 | 0.61140001 |
| chr2 | 187367117 | 187406659 | 39543  | 4  | 4 | 0 | 0.76005302 | 0          | 1 | 3 | 0.01091641 | 0.93173516 |
| chr2 | 187406659 | 187477526 | 70868  | 2  | 4 | 0 | 0.76005302 | 0          | 1 | 2 | 0.01091641 | 0.61140001 |
| chr2 | 187477526 | 187559898 | 82373  | 2  | 4 | 0 | 0.76005302 | 0          | 1 | 3 | 0.01091641 | 0.93173516 |
| chr2 | 187559898 | 188103179 | 543282 | 8  | 3 | 0 | 0.51676182 | 0          | 1 | 3 | 0.02438896 | 0.93173516 |
| chr2 | 188103179 | 188210149 | 106971 | 2  | 0 | 0 | 0.51676182 | 0          | 1 | 4 | 0.02438896 | 1.26272838 |
| chr2 | 188210149 | 188296166 | 86018  | 4  | 4 | 0 | 0.76005302 | 0          | 1 | 4 | 0.01091641 | 1.26272838 |
| chr2 | 188296166 | 188361705 | 65540  | 2  | 0 | 0 | 0.51676182 | 0          | 1 | 4 | 0.02438896 | 1.26272838 |
| chr2 | 188361705 | 188361764 | 60     | 1  | 4 | 0 | 0.76005302 | 0          | 1 | 4 | 0.01091641 | 1.26272838 |
| chr2 | 188361764 | 188546067 | 184304 | 3  | 0 | 0 | 0.51676182 | 0          | 1 | 4 | 0.02438896 | 1.26272838 |
| chr2 | 188546067 | 188842449 | 296383 | 2  | 2 | 0 | 0.61140001 | 0          | 0 | 4 | 0          | 1.26272838 |
| chr2 | 188842449 | 188960064 | 117616 | 2  | 1 | 0 | 0.61140001 | 0.01091641 | 0 | 4 | 0          | 0.76005302 |
| chr2 | 188960064 | 189200464 | 240401 | 6  | 3 | 1 | 0.51676182 | 0.00478973 | 1 | 5 | 0.02438896 | 1.02643191 |
| chr2 | 189200464 | 189314202 | 113739 | 3  | 2 | 1 | 0.30102999 | 0.00478973 | 1 | 5 | 0.05404976 | 1.02643191 |
| chr2 | 189314202 | 189354436 | 40235  | 1  | 2 | 1 | 0.30102999 | 0.01091641 | 1 | 4 | 0.05404976 | 0.76005302 |
| chr2 | 189354436 | 189354495 | 60     | 1  | 3 | 1 | 0.51676182 | 0.01091641 | 1 | 4 | 0.02438896 | 0.76005302 |
| chr2 | 189354495 | 189546465 | 300151 | 6  | 3 | 1 | 0.51676182 | 0.02438896 | 1 | 3 | 0.02438896 | 0.51676182 |
| chr2 | 189546465 | 189654704 | 60     | 1  | 3 | 1 | 0.51676182 | 0.01091641 | 1 | 4 | 0.02438896 | 0.76005302 |
| chr2 | 189654704 | 189735237 | 80534  | 1  | 2 | 1 | 0.30102999 | 0.01091641 | 1 | 4 | 0.05404976 | 0.76005302 |
| chr2 | 189735237 | 189822690 | 87454  | 2  | 1 | 0 | 0.30102999 | 0.00478973 | 1 | 4 | 0.05404976 | 1.02643191 |
| chr2 | 189822690 | 189839204 | 16515  | 2  | 1 | 0 | 0.30102999 | 0.00204627 | 1 | 6 | 0.05404976 | 1.31360226 |
| chr2 | 189839204 | 189925490 | 86287  | 4  | 2 | 1 | 0.30102999 | 0.00478973 | 1 | 5 | 0.05404976 | 1.02643191 |
| chr2 | 189925490 | 189975131 | 49642  | 1  | 2 | 1 | 0.30102999 | 0.01091641 | 1 | 4 | 0.05404976 | 0.76005302 |
| chr2 | 189975131 | 190044294 | 69164  | 3  | 1 | 0 | 0.30102999 | 0.00478973 | 1 | 5 | 0.05404976 | 1.02643191 |
| chr2 | 190044294 | 190258780 | 214487 | 1  | 2 | 1 | 0.30102999 | 0.02438896 | 1 | 3 | 0.05404976 | 0.51676182 |
| chr2 |           |           |        |    |   |   |            |            |   |   |            |            |

|      |           |           |        |    |   |   |            |            |   |            |            |            |
|------|-----------|-----------|--------|----|---|---|------------|------------|---|------------|------------|------------|
| chr2 | 196837193 | 197081786 | 244594 | 5  | 1 | 0 | 0.1218695  | 0          | 1 | 3          | 0.1218695  | 0.93173516 |
| chr2 | 197081786 | 197081845 | 60     | 1  | 1 | 0 | 0.1218695  | 0          | 1 | 4          | 0.1218695  | 1.26272838 |
| chr2 | 197081845 | 197399574 | 317730 | 6  | 1 | 0 | 0.1218695  | 0          | 1 | 3          | 0.1218695  | 0.93173516 |
| chr2 | 197399574 | 197451480 | 51907  | 2  | 1 | 0 | 0.1218695  | 0          | 1 | 4          | 0.1218695  | 1.26272838 |
| chr2 | 197451480 | 197584153 | 132674 | 4  | 1 | 1 | 0.1218695  | 0.10191641 | 1 | 4          | 0.1218695  | 0.76005302 |
| chr2 | 197584153 | 197597450 | 13298  | 2  | 1 | 2 | 0.1218695  | 0.02162467 | 1 | 5          | 0.1218695  | 0.68214471 |
| chr2 | 197597450 | 197597509 | 60     | 1  | 1 | 2 | 0.1218695  | 0.10531919 | 1 | 6          | 0.1218695  | 0.91219088 |
| chr2 | 197597509 | 197645140 | 47632  | 2  | 1 | 2 | 0.1218695  | 0.0429175  | 1 | 4          | 0.1218695  | 0.47744371 |
| chr2 | 197645140 | 197645199 | 60     | 1  | 1 | 2 | 0.1218695  | 0.02162467 | 1 | 5          | 0.1218695  | 0.68214471 |
| chr2 | 197645199 | 197712380 | 67182  | 2  | 1 | 2 | 0.1218695  | 0.0429175  | 1 | 4          | 0.1218695  | 0.47744371 |
| chr2 | 197712380 | 197737191 | 24812  | 1  | 1 | 1 | 0.1218695  | 0.10191641 | 1 | 4          | 0.1218695  | 0.76005302 |
| chr2 | 197737191 | 197767292 | 30102  | 2  | 1 | 1 | 0.1218695  | 0.00478973 | 1 | 5          | 0.1218695  | 1.02643191 |
| chr2 | 197767292 | 197767351 | 60     | 1  | 1 | 1 | 0.05404976 | 0.00478973 | 2 | 5          | 0.30102999 | 1.02643191 |
| chr2 | 197767351 | 197815812 | 48462  | 1  | 1 | 1 | 0.05404976 | 0.10191641 | 2 | 4          | 0.30102999 | 0.76005302 |
| chr2 | 197815812 | 197878082 | 62271  | 1  | 1 | 1 | 0.05404976 | 0.02438896 | 2 | 3          | 0.30102999 | 0.51676182 |
| chr2 | 197878082 | 198153006 | 274925 | 9  | 1 | 1 | 0.05404976 | 0.10191641 | 2 | 4          | 0.30102999 | 0.76005302 |
| chr2 | 198153006 | 198274696 | 121691 | 2  | 1 | 1 | 0.1218695  | 0.10191641 | 1 | 4          | 0.1218695  | 0.76005302 |
| chr2 | 198274696 | 198382204 | 107509 | 7  | 1 | 2 | 0.05404976 | 0.0429175  | 2 | 4          | 0.30102999 | 0.76005302 |
| chr2 | 198382204 | 198436548 | 54345  | 2  | 1 | 1 | 0.05404976 | 0.10191641 | 2 | 4          | 0.30102999 | 0.76005302 |
| chr2 | 198436548 | 198436607 | 60     | 1  | 1 | 2 | 0.05404976 | 0.0429175  | 2 | 4          | 0.30102999 | 0.47744371 |
| chr2 | 198436607 | 198495899 | 59283  | 2  | 1 | 1 | 0.1218695  | 0.10191641 | 1 | 4          | 0.1218695  | 0.76005302 |
| chr2 | 198495899 | 198495948 | 60     | 1  | 1 | 2 | 0.1218695  | 0.0429175  | 1 | 4          | 0.1218695  | 0.47744371 |
| chr2 | 198495948 | 198572328 | 76381  | 2  | 1 | 1 | 0.1218695  | 0.10191641 | 1 | 1          | 0.1218695  | 0.76005302 |
| chr2 | 198572328 | 198572387 | 60     | 1  | 1 | 1 | 0.05404976 | 0.10191641 | 2 | 4          | 0.30102999 | 0.76005302 |
| chr2 | 198572387 | 198636604 | 64218  | 2  | 1 | 0 | 0.1218695  | 0          | 1 | 4          | 0.1218695  | 1.26272838 |
| chr2 | 198636604 | 198684739 | 48136  | 2  | 1 | 0 | 0.1218695  | 0          | 1 | 5          | 0.1218695  | 1.60515106 |
| chr2 | 198684739 | 198717116 | 32378  | 1  | 1 | 0 | 0.1218695  | 0          | 1 | 4          | 0.1218695  | 1.26272838 |
| chr2 | 198717116 | 198926296 | 209181 | 5  | 1 | 0 | 0.30102999 | 0          | 0 | 4          | 0          | 1.26272838 |
| chr2 | 198926296 | 199011771 | 85476  | 1  | 1 | 0 | 0.30102999 | 0          | 0 | 2          | 0          | 0.61140001 |
| chr2 | 199011771 | 199112754 | 100984 | 3  | 1 | 0 | 0.30102999 | 0          | 0 | 4          | 0          | 1.26272838 |
| chr2 | 199112754 | 199245600 | 132847 | 1  | 0 | 0 | 0          | 0          | 0 | 4          | 0          | 1.26272838 |
| chr2 | 199245600 | 199410661 | 165062 | 1  | 0 | 0 | 0          | 0          | 0 | 2          | 0          | 0.61140001 |
| chr2 | 199410661 | 199818779 | 408119 | 3  | 0 | 0 | 0          | 0          | 0 | 0          | 0          | 0.30102999 |
| chr2 | 199818779 | 200188500 | 369722 | 5  | 0 | 0 | 0          | 0          | 0 | 3          | 0          | 0.93173516 |
| chr2 | 200188500 | 200436597 | 248098 | 8  | 0 | 1 | 0          | 0.02438896 | 0 | 0          | 0          | 0.51676182 |
| chr2 | 200436597 | 200527692 | 91096  | 1  | 0 | 1 | 0          | 0.05404976 | 0 | 2          | 0          | 0.30102999 |
| chr2 | 200527692 | 200623899 | 96208  | 2  | 0 | 2 | 0          | 0.1575501  | 0 | 2          | 0          | 0.1575501  |
| chr2 | 200623899 | 200676482 | 52584  | 2  | 0 | 2 | 0          | 0.0429175  | 0 | 0          | 0          | 0.47744371 |
| chr2 | 200676482 | 200734985 | 58504  | 2  | 1 | 2 | 0.30102999 | 0.0429175  | 0 | 4          | 0          | 0.47744371 |
| chr2 | 200734985 | 200803807 | 68823  | 4  | 1 | 2 | 0.30102999 | 0.02162467 | 0 | 5          | 0          | 0.68214471 |
| chr2 | 200803807 | 200946982 | 143176 | 3  | 1 | 1 | 0.30102999 | 0.10191641 | 0 | 4          | 0          | 0.76005302 |
| chr2 | 200946982 | 200947041 | 60     | 1  | 1 | 3 | 0.1218695  | 0.05670724 | 1 | 5          | 0.1218695  | 0.45545077 |
| chr2 | 200947041 | 201033024 | 85984  | 1  | 1 | 3 | 0.1218695  | 0.10122019 | 1 | 4          | 0.1218695  | 0.30102999 |
| chr2 | 201033024 | 201119231 | 86208  | 1  | 1 | 3 | 0.1218695  | 0.17593012 | 1 | 3          | 0.1218695  | 0.17593012 |
| chr2 | 201119231 | 201169195 | 49965  | 2  | 1 | 3 | 0.1218695  | 0.10122019 | 1 | 4          | 0.1218695  | 0.30102999 |
| chr2 | 201169195 | 201204544 | 35350  | 1  | 1 | 3 | 0.1218695  | 0.17593012 | 1 | 3          | 0.1218695  | 0.17593012 |
| chr2 | 201204544 | 201204603 | 60     | 1  | 1 | 3 | 0.1218695  | 0.10122019 | 1 | 4          | 0.1218695  | 0.30102999 |
| chr2 | 201204603 | 201229684 | 25082  | 1  | 1 | 3 | 0.30102999 | 0.17593012 | 0 | 3          | 0          | 0.17593012 |
| chr2 | 201229684 | 201229743 | 60     | 1  | 1 | 3 | 0.30102999 | 0.10122019 | 0 | 4          | 0          | 0.30102999 |
| chr2 | 201229743 | 201373685 | 143943 | 4  | 1 | 2 | 0.30102999 | 0.0429175  | 0 | 4          | 0          | 0.47744371 |
| chr2 | 201373685 | 201434635 | 60951  | 3  | 1 | 3 | 0.30102999 | 0.05670724 | 0 | 5          | 0          | 0.45545077 |
| chr2 | 201434635 | 201434694 | 60     | 1  | 1 | 3 | 0.1218695  | 0.05670724 | 1 | 5          | 0.1218695  | 0.45545077 |
| chr2 | 201434694 | 201448172 | 13479  | 2  | 1 | 2 | 0.30102999 | 0.02162467 | 0 | 5          | 0          | 0.68214471 |
| chr2 | 201448172 | 201673479 | 225308 | 6  | 1 | 3 | 0.30102999 | 0.05670724 | 0 | 5          | 0          | 0.45545077 |
| chr2 | 201673479 | 201766681 | 93203  | 6  | 1 | 4 | 0.30102999 | 0.11390336 | 0 | 5          | 0          | 0.30102999 |
| chr2 | 201766681 | 202221948 | 455268 | 15 | 1 | 3 | 0.30102999 | 0.05670724 | 0 | 5          | 0          | 0.45545077 |
| chr2 | 202221948 | 202222007 | 60     | 1  | 1 | 3 | 0.1218695  | 0.05670724 | 1 | 5          | 0.1218695  | 0.45545077 |
| chr2 | 202222007 | 202272223 | 50217  | 2  | 1 | 2 | 0.30102999 | 0.02162467 | 0 | 5          | 0          | 0.68214471 |
| chr2 | 202272223 | 202313327 | 41105  | 3  | 1 | 3 | 0.1218695  | 0.05670724 | 1 | 5          | 0.1218695  | 0.45545077 |
| chr2 | 202313327 | 202376776 | 63450  | 3  | 1 | 2 | 0.1218695  | 0.02162467 | 1 | 5          | 0.1218695  | 0.68214471 |
| chr2 | 202376776 | 202446821 | 70046  | 2  | 1 | 0 | 0.1218695  | 0          | 1 | 4          | 0.1218695  | 1.26272838 |
| chr2 | 202446821 | 202625782 | 178962 | 6  | 1 | 1 | 0.1218695  | 0.10191641 | 1 | 4          | 0.1218695  | 0.76005302 |
| chr2 | 202625782 | 202625839 | 58     | 1  | 1 | 1 | 0.02438896 | 0.10191641 | 3 | 4          | 0.51676182 | 0.76005302 |
| chr2 | 202625839 | 202714071 | 88233  | 2  | 1 | 1 | 0.1218695  | 0.10191641 | 1 | 4          | 0.1218695  | 0.76005302 |
| chr2 | 202714071 | 202779782 | 65732  | 2  | 1 | 1 | 0.30102999 | 0.10191641 | 0 | 4          | 0          | 0.76005302 |
| chr2 | 202779782 | 202847486 | 67405  | 2  | 1 | 2 | 0.30102999 | 0.0429175  | 0 | 4          | 0          | 0.47744371 |
| chr2 | 202847486 | 202902999 | 55814  | 1  | 1 | 2 | 0.1218695  | 0.0429175  | 1 | 4          | 0.1218695  | 0.47744371 |
| chr2 | 202902999 | 202988521 | 95523  | 2  | 1 | 2 | 0.30102999 | 0.0429175  | 0 | 4          | 0          | 0.47744371 |
| chr2 | 202988521 | 203149074 | 150554 | 3  | 1 | 1 | 0.30102999 | 0.10191641 | 0 | 4          | 0          | 0.76005302 |
| chr2 | 203149074 | 203218504 | 69431  | 3  | 1 | 2 | 0.1218695  | 0.0429175  | 1 | 4          | 0.1218695  | 0.47744371 |
| chr2 | 203218504 | 203218563 | 60     | 1  | 1 | 2 | 0.05404976 | 0.0429175  | 2 | 4          | 0.30102999 | 0.47744371 |
| chr2 | 203218563 | 203289542 | 70980  | 1  | 1 | 2 | 0.1218695  | 0.0429175  | 1 | 4          | 0.1218695  | 0.47744371 |
| chr2 | 203289542 | 203379728 | 90187  | 3  | 1 | 3 | 0.05404976 | 0.10122019 | 2 | 4          | 0.30102999 | 0.30102999 |
| chr2 | 203379728 | 203456771 | 77044  | 2  | 1 | 3 | 0.1218695  | 0.10122019 | 1 | 4          | 0.1218695  | 0.30102999 |
| chr2 | 203456771 | 203507328 | 50558  | 2  | 1 | 3 | 0.05404976 | 0.10122019 | 2 | 4          | 0.30102999 | 0.30102999 |
| chr2 | 203507328 | 203631801 | 124474 | 4  | 1 | 2 | 0.05404976 | 0.0429175  | 2 | 4          | 0.30102999 | 0.47744371 |
| chr2 | 203631801 | 203661667 | 29867  | 2  | 1 | 2 | 0.02438896 | 0.0429175  | 3 | 4          | 0.51676182 | 0.47744371 |
| chr2 | 203661667 | 203686021 | 24355  | 1  | 1 | 2 | 0.1218695  | 0.0429175  | 1 | 4          | 0.1218695  | 0.47744371 |
| chr2 | 203686021 | 203686080 | 60     | 1  | 1 | 3 | 0.1218695  | 0.10122019 | 1 | 4          | 0.1218695  | 0.30102999 |
| chr2 | 203686080 | 203735358 | 49279  | 1  | 1 | 2 | 0.1218695  | 0.08289318 | 1 | 3          | 0.1218695  | 0.30102999 |
| chr2 | 203735358 | 203760902 | 25545  | 1  | 1 | 2 | 0.1218695  | 0.1575501  | 1 | 2          | 0.1218695  | 0.1575501  |
| chr2 | 203760902 | 203776773 | 15872  | 2  | 1 | 3 | 0.1218695  | 0.17593012 | 1 | 3          | 0.1218695  | 0.17593012 |
| chr2 | 203776773 | 203776829 | 57     | 1  | 1 | 3 | 0.1218695  | 0.10122019 | 1 | 4          | 0.1218695  | 0.30102999 |
| chr2 | 203776829 | 203798971 | 22143  | 1  | 1 | 2 | 0.1218695  | 0.0429175  | 1 | 1          | 0.1218695  | 0.47744371 |
| chr2 | 203798971 | 204031010 | 232040 | 6  | 1 | 2 | 0.1218695  | 0.02162467 | 1 | 5          | 0.1218695  | 0.68214471 |
| chr2 | 204031010 | 204137415 | 106406 | 2  | 1 | 1 | 0.1218695  | 0.00478973 | 1 | 5          | 0.1218695  | 1.02643191 |
| chr2 | 204137415 | 204137474 | 60     | 1  | 1 | 2 | 0.1218695  | 0.02162467 | 1 | 5          | 0.1218695  | 0.68214471 |
| chr2 | 204137474 | 204324671 | 187198 | 8  | 0 | 2 | 0          | 0.0429175  | 1 | 4          | 0.30102999 | 0.47744371 |
| chr2 | 204324671 | 204394564 | 69894  | 2  | 0 | 2 | 0.1575501  | 0          | 2 | 4          | 0.30102999 | 0.1575501  |
| chr2 | 204394564 | 204493161 | 98598  | 2  | 0 | 2 | 0.08289318 | 0          | 1 | 3          | 0.30102999 | 0.30102999 |
| chr2 | 204493161 | 204581362 | 88202  | 1  | 0 | 2 | 0.1575501  | 0          | 2 | 0.30102999 | 0.1575501  |            |
| chr2 | 204581362 | 204594462 | 13101  | 2  | 0 | 2 | 0          | 0.0429175  | 1 | 4          | 0.30102999 | 0.47744371 |
| chr2 | 204594462 | 204631833 | 37372  | 2  | 0 | 2 | 0.02162467 | 0          | 5 | 0.30102999 | 0.682      |            |



|      |           |           |        |    |   |   |            |            |   |   |   |            |
|------|-----------|-----------|--------|----|---|---|------------|------------|---|---|---|------------|
| chr2 | 207972973 | 207973032 | 60     | 1  | 1 | 1 | 0.30102999 | 0.00478973 | 0 | 5 | 0 | 1.02643191 |
| chr2 | 207973032 | 208313163 | 340132 | 6  | 1 | 1 | 0.30102999 | 0.01091641 | 0 | 4 | 0 | 0.76005302 |
| chr2 | 208313163 | 208404527 | 91365  | 2  | 1 | 1 | 0.30102999 | 0.00478973 | 0 | 5 | 0 | 1.02643191 |
| chr2 | 208404527 | 208541742 | 137216 | 7  | 1 | 1 | 0.1218695  | 0.00478973 | 1 | 5 | 0 | 1.02643191 |
| chr2 | 208541742 | 208631364 | 89623  | 3  | 1 | 1 | 0.1218695  | 0.01091641 | 1 | 4 | 0 | 0.76005302 |
| chr2 | 208631364 | 208710304 | 78941  | 1  | 1 | 1 | 0.30102999 | 0.01091641 | 0 | 4 | 0 | 0.76005302 |
| chr2 | 208710304 | 208741236 | 30933  | 2  | 1 | 1 | 0.30102999 | 0.00478973 | 0 | 5 | 0 | 1.02643191 |
| chr2 | 208741236 | 208857221 | 115986 | 2  | 1 | 1 | 0.30102999 | 0.01091641 | 0 | 4 | 0 | 0.76005302 |
| chr2 | 208857221 | 208857280 | 60     | 1  | 1 | 1 | 0.30102999 | 0.00478973 | 0 | 5 | 0 | 1.02643191 |
| chr2 | 208857280 | 208993534 | 136255 | 5  | 1 | 1 | 0.30102999 | 0.01091641 | 0 | 4 | 0 | 0.76005302 |
| chr2 | 208993534 | 209026391 | 32858  | 2  | 1 | 1 | 0.30102999 | 0.02438896 | 0 | 3 | 0 | 0.51676182 |
| chr2 | 209026391 | 209026450 | 60     | 1  | 1 | 1 | 0.30102999 | 0.01091641 | 0 | 4 | 0 | 0.76005302 |
| chr2 | 209026450 | 209309442 | 282993 | 9  | 1 | 1 | 0.30102999 | 0.02438896 | 0 | 3 | 0 | 0.51676182 |
| chr2 | 209309442 | 209359004 | 49563  | 2  | 1 | 1 | 0.30102999 | 0.01091641 | 0 | 4 | 0 | 0.76005302 |
| chr2 | 209359004 | 209491032 | 132029 | 2  | 1 | 1 | 0.30102999 | 0.02438896 | 0 | 3 | 0 | 0.51676182 |
| chr2 | 209491032 | 209568496 | 77465  | 2  | 1 | 1 | 0.30102999 | 0.01091641 | 0 | 4 | 0 | 0.76005302 |
| chr2 | 209568496 | 209745339 | 176844 | 2  | 0 | 1 | 0          | 0.05404976 | 0 | 2 | 0 | 0.30102999 |
| chr2 | 209745339 | 209836320 | 90982  | 2  | 0 | 1 | 0          | 0.02438896 | 0 | 3 | 0 | 0.51676182 |
| chr2 | 209836320 | 210021463 | 185144 | 2  | 0 | 2 | 0          | 0.08289318 | 0 | 3 | 0 | 0.30102999 |
| chr2 | 210021463 | 210341410 | 319948 | 4  | 0 | 3 | 0          | 0.10122019 | 1 | 4 | 0 | 0.30102999 |
| chr2 | 210341410 | 210408298 | 66889  | 2  | 0 | 1 | 0          | 0.0429175  | 1 | 4 | 0 | 0.47744371 |
| chr2 | 210408298 | 210408357 | 60     | 1  | 0 | 2 | 0          | 0.10122019 | 1 | 4 | 0 | 0.30102999 |
| chr2 | 210408357 | 210489802 | 81446  | 0  | 0 | 2 | 0          | 0.0429175  | 0 | 2 | 0 | 0          |
| chr2 | 210489802 | 210489861 | 60     | 1  | 0 | 4 | 0          | 0.18734596 | 0 | 4 | 0 | 0.47744371 |
| chr2 | 210489861 | 210561692 | 71832  | 1  | 0 | 3 | 0          | 0.10122019 | 0 | 4 | 0 | 0.30102999 |
| chr2 | 210561692 | 210561751 | 60     | 1  | 0 | 3 | 0          | 0.05670724 | 0 | 5 | 0 | 0.45545077 |
| chr2 | 210561751 | 210682866 | 121116 | 0  | 0 | 3 | 0          | 0.10122019 | 0 | 4 | 0 | 0.30102999 |
| chr2 | 210682866 | 210821769 | 138904 | 4  | 0 | 2 | 0          | 0.0429175  | 0 | 4 | 0 | 0.47744371 |
| chr2 | 210821769 | 21099516  | 177748 | 6  | 0 | 1 | 0          | 0.01091641 | 0 | 4 | 0 | 0.76005302 |
| chr2 | 21099516  | 211241961 | 242446 | 5  | 0 | 1 | 0          | 0.02438896 | 0 | 3 | 0 | 0.51676182 |
| chr2 | 211241961 | 211242020 | 60     | 1  | 0 | 3 | 0          | 0.05670724 | 0 | 5 | 0 | 0.45545077 |
| chr2 | 211242020 | 211296666 | 54647  | 1  | 0 | 2 | 0          | 0.0429175  | 0 | 4 | 0 | 0.47744371 |
| chr2 | 211296666 | 211305491 | 8826   | 2  | 0 | 3 | 0          | 0.10122019 | 0 | 4 | 0 | 0.30102999 |
| chr2 | 211305491 | 211376495 | 71005  | 2  | 0 | 1 | 0          | 0.01091641 | 0 | 4 | 0 | 0.76005302 |
| chr2 | 211376495 | 211458283 | 81789  | 3  | 0 | 3 | 0          | 0.10122019 | 0 | 4 | 0 | 0.30102999 |
| chr2 | 211458283 | 211483655 | 25373  | 2  | 0 | 0 | 0          | 0.05670724 | 0 | 5 | 0 | 0.45545077 |
| chr2 | 211483655 | 211542926 | 59272  | 3  | 0 | 2 | 0          | 0.02162467 | 0 | 5 | 0 | 0.68214471 |
| chr2 | 211542926 | 211687462 | 144537 | 1  | 0 | 1 | 0          | 0.01091641 | 0 | 4 | 0 | 0.76005302 |
| chr2 | 211687462 | 211687521 | 60     | 1  | 0 | 1 | 0          | 0.01091641 | 1 | 4 | 0 | 0.76005302 |
| chr2 | 211687521 | 212207827 | 520307 | 2  | 0 | 1 | 0          | 0.02438896 | 0 | 3 | 0 | 0.51676182 |
| chr2 | 212207827 | 212360311 | 152485 | 4  | 0 | 2 | 0          | 0.08289318 | 0 | 3 | 0 | 0.30102999 |
| chr2 | 212360311 | 212435598 | 75288  | 1  | 0 | 2 | 0          | 0.1575501  | 0 | 2 | 0 | 0.1575501  |
| chr2 | 212435598 | 212488620 | 53023  | 2  | 1 | 2 | 0.30102999 | 0.1575501  | 0 | 2 | 0 | 0.1575501  |
| chr2 | 212488620 | 212488679 | 60     | 1  | 2 | 2 | 0.1218695  | 0.08289318 | 1 | 3 | 0 | 0.30102999 |
| chr2 | 212488679 | 212626304 | 137626 | 3  | 1 | 2 | 0.30102999 | 0.08289318 | 0 | 2 | 0 | 0.30102999 |
| chr2 | 212626304 | 212885502 | 259199 | 5  | 0 | 0 | 0          | 0.1575501  | 0 | 2 | 0 | 0.1575501  |
| chr2 | 212885502 | 212945192 | 59691  | 2  | 0 | 2 | 0          | 0.1575501  | 1 | 2 | 0 | 0.30102999 |
| chr2 | 212945192 | 213010278 | 65087  | 2  | 0 | 2 | 0          | 0.08289318 | 2 | 3 | 0 | 0.30102999 |
| chr2 | 213010278 | 213010337 | 60     | 1  | 0 | 2 | 0          | 0.0429175  | 2 | 4 | 0 | 0.47744371 |
| chr2 | 213010337 | 213146361 | 136025 | 3  | 0 | 2 | 0          | 0.1575501  | 2 | 2 | 0 | 0.1575501  |
| chr2 | 213146361 | 213211210 | 64850  | 2  | 0 | 2 | 0          | 0.0429175  | 2 | 4 | 0 | 0.47744371 |
| chr2 | 213211210 | 213278502 | 67293  | 2  | 0 | 2 | 0          | 0.08289318 | 1 | 3 | 0 | 0.30102999 |
| chr2 | 213278502 | 213292156 | 13655  | 2  | 0 | 3 | 0          | 0.10122019 | 2 | 4 | 0 | 0.30102999 |
| chr2 | 213292156 | 213425995 | 133840 | 3  | 0 | 1 | 0          | 0.08289318 | 1 | 3 | 0 | 0.30102999 |
| chr2 | 213425995 | 213638894 | 212900 | 3  | 0 | 3 | 0          | 0.10122019 | 2 | 4 | 0 | 0.30102999 |
| chr2 | 213638894 | 213877289 | 238396 | 2  | 0 | 3 | 0          | 0.10122019 | 1 | 4 | 0 | 0.30102999 |
| chr2 | 213877289 | 213935829 | 58541  | 4  | 0 | 3 | 0          | 0.10122019 | 2 | 4 | 0 | 0.30102999 |
| chr2 | 213935829 | 213980390 | 44562  | 2  | 1 | 3 | 0.05404976 | 0.10122019 | 2 | 4 | 0 | 0.30102999 |
| chr2 | 213980390 | 213980449 | 60     | 1  | 1 | 3 | 0.05404976 | 0.05670724 | 2 | 5 | 0 | 0.30102999 |
| chr2 | 213980449 | 213999327 | 18879  | 1  | 0 | 3 | 0          | 0.05670724 | 1 | 5 | 0 | 0.45545077 |
| chr2 | 213999327 | 214215255 | 215929 | 4  | 0 | 3 | 0          | 0.10122019 | 0 | 4 | 0 | 0.30102999 |
| chr2 | 214215255 | 214229493 | 14239  | 2  | 0 | 3 | 0          | 0.05670724 | 1 | 5 | 0 | 0.45545077 |
| chr2 | 214229493 | 214229552 | 60     | 1  | 0 | 4 | 0          | 0.11390336 | 1 | 5 | 0 | 0.30102999 |
| chr2 | 214229552 | 214354975 | 125201 | 2  | 0 | 3 | 0          | 0.05670724 | 1 | 5 | 0 | 0.30102999 |
| chr2 | 214354975 | 214454980 | 194151 | 4  | 0 | 2 | 0          | 0.0429175  | 1 | 4 | 0 | 0.47744371 |
| chr2 | 214454980 | 214603896 | 134985 | 3  | 0 | 1 | 0          | 0.10122019 | 1 | 4 | 0 | 0.30102999 |
| chr2 | 214603896 | 214683945 | 60     | 1  | 0 | 5 | 0          | 0.19510895 | 0 | 3 | 0 | 0.19510895 |
| chr2 | 214683945 | 214858265 | 174321 | 3  | 0 | 4 | 0          | 0.11390336 | 1 | 5 | 0 | 0.30102999 |
| chr2 | 214858265 | 214919902 | 61638  | 2  | 0 | 3 | 0          | 0.05670724 | 1 | 5 | 0 | 0.45545077 |
| chr2 | 214919902 | 214919961 | 60     | 1  | 0 | 4 | 0          | 0.11390336 | 1 | 5 | 0 | 0.30102999 |
| chr2 | 214919961 | 214992026 | 72066  | 2  | 0 | 4 | 0          | 0.18734596 | 0 | 4 | 0 | 0.18734596 |
| chr2 | 214992026 | 215050998 | 58973  | 1  | 0 | 3 | 0          | 0.10122019 | 1 | 4 | 0 | 0.30102999 |
| chr2 | 215050998 | 215051057 | 60     | 1  | 0 | 3 | 0          | 0.05670724 | 1 | 5 | 0 | 0.45545077 |
| chr2 | 215051057 | 215190468 | 139412 | 2  | 0 | 3 | 0          | 0.10122019 | 1 | 4 | 0 | 0.30102999 |
| chr2 | 215190468 | 215378625 | 188158 | 6  | 0 | 4 | 0          | 0.11390336 | 1 | 5 | 0 | 0.30102999 |
| chr2 | 215378625 | 215420448 | 41824  | 1  | 0 | 3 | 0          | 0.05670724 | 1 | 5 | 0 | 0.45545077 |
| chr2 | 215420448 | 215944012 | 523565 | 11 | 0 | 2 | 0          | 0.02162467 | 1 | 5 | 0 | 0.68214471 |
| chr2 | 215944012 | 215976407 | 32396  | 2  | 0 | 2 | 0          | 0.01053319 | 1 | 6 | 0 | 0.91219088 |
| chr2 | 215976407 | 216226309 | 249903 | 6  | 0 | 2 | 0          | 0.02162467 | 1 | 5 | 0 | 0.68214471 |
| chr2 | 216226309 | 216299499 | 73191  | 3  | 0 | 2 | 0          | 0.01053319 | 1 | 6 | 0 | 0.91219088 |
| chr2 | 216299499 | 216299557 | 59     | 1  | 0 | 3 | 0          | 0.03070643 | 1 | 6 | 0 | 0.63695542 |
| chr2 | 216299557 | 216351479 | 51923  | 1  | 0 | 2 | 0          | 0.02162467 | 1 | 5 | 0 | 0.68214471 |
| chr2 | 216351479 | 216435542 | 84064  | 2  | 0 | 3 | 0          | 0.05670724 | 1 | 5 | 0 | 0.45545077 |
| chr2 | 216435542 | 216435601 | 60     | 1  | 0 | 4 | 0          | 0.06713722 | 1 | 6 | 0 | 0.44141547 |
| chr2 | 216435601 | 216512368 | 76768  | 1  | 0 | 3 | 0          | 0.03070643 | 1 | 6 | 0 | 0.63695542 |
| chr2 | 216512368 | 216733008 | 220641 | 3  | 0 | 2 | 0          | 0.02162467 | 1 | 5 | 0 | 0.68214471 |
| chr2 | 216733008 | 216810439 | 77432  | 2  | 0 | 2 | 0          | 0.01053319 | 1 | 6 | 0 | 0.91219088 |
| chr2 | 216810439 | 216850184 | 39746  | 1  | 0 | 1 | 0          | 0.00204627 | 1 | 6 | 0 | 1.31360226 |
| chr2 | 216850184 | 217277777 | 427594 | 9  | 0 | 1 | 0          | 0.00478973 | 5 | 6 | 0 | 1.02643191 |
| chr2 | 217277777 | 217279429 | 1653   | 2  | 0 | 1 | 0          | 0.00204627 | 1 | 6 | 0 | 1.31360226 |
| chr2 | 217279429 | 217428847 | 149419 | 4  | 0 | 1 | 0          | 0.00478973 | 1 | 5 | 0 | 1.02643191 |
| chr2 | 217428847 | 217509737 | 80891  | 2  | 0 | 1 | 0          | 0.01091641 | 1 | 4 | 0 | 0.76005302 |
| chr2 | 217509737 | 217525718 | 15982  | 1  | 0 | 1 | 0          | 0.02438896 | 1 | 3 | 0 | 0.51676182 |
| chr2 | 217525718 | 217592468 | 66751  | 5  | 0 | 2 | 0          | 0.0429175  | 1 | 4 | 0 | 0.47744371 |
| chr2 | 217592468 | 217592527 | 60     | 1  | 0 | 2 | 0          | 0.02162467 | 1 | 5 | 0 | 0.68214471 |
| chr2 | 217592527 | 217724168 | 131642 | 2  | 0 | 2 | 0          | 0.08289318 | 1 | 3 | 0 | 0.30102999 |
| chr2 | 217724168 | 217724527 | 360    | 2  | 0 | 2 | 0          | 0.01053319 | 1 | 6 | 0 | 0.91219088 |
| chr2 | 217724527 | 217821395 | 96869  | 1  | 0 | 2 | 0          | 0.08289318 | 1 | 3 | 0 | 0.30102999 |
| chr2 | 217821395 | 217955845 | 134451 | 1  | 0 | 2 | 0          | 0.08289318 | 0 | 3 | 0 | 0.30102999 |
| chr2 | 217955845 | 218195736 | 239892 | 1  | 0 | 2 | 0          | 0.1575501  | 0 | 2 | 0 | 0.1575501  |
| chr2 |           |           |        |    |   |   |            |            |   |   |   |            |

|      |           |           |        |    |   |   |            |            |           |   |            |            |
|------|-----------|-----------|--------|----|---|---|------------|------------|-----------|---|------------|------------|
| chr2 | 219394722 | 219427401 | 32680  | 2  | 3 | 2 | 0.51676182 | 0.00493743 | 1         | 7 | 0.02438896 | 1.16581773 |
| chr2 | 219427401 | 219457387 | 29987  | 2  | 3 | 3 | 0.51676182 | 0.01598258 | 1         | 7 | 0.02438896 | 0.84395715 |
| chr2 | 219457387 | 219457446 | 60     | 1  | 3 | 4 | 0.51676182 | 0.02074938 | 1         | 8 | 0.02438896 | 0.79906872 |
| chr2 | 219457446 | 219746429 | 288984 | 13 | 3 | 4 | 0.51676182 | 0.03812622 | 1         | 7 | 0.02438896 | 0.60763643 |
| chr2 | 219746429 | 220047798 | 301370 | 14 | 2 | 4 | 0.30102999 | 0.03812622 | 1         | 7 | 0.05404976 | 0.60763643 |
| chr2 | 220047798 | 220134029 | 86232  | 8  | 2 | 3 | 0.30102999 | 0.01598258 | 1         | 7 | 0.05404976 | 0.84395715 |
| chr2 | 220134029 | 220149280 | 125252 | 2  | 2 | 4 | 0.30102999 | 0.03812622 | 1         | 7 | 0.05404976 | 0.60763643 |
| chr2 | 220149280 | 220471933 | 322654 | 14 | 2 | 3 | 0.61140001 | 0.01598258 | 0         | 7 | 0          | 0.84395715 |
| chr2 | 220471933 | 220474444 | 2512   | 2  | 2 | 3 | 0.61140001 | 0.0079614  | 0         | 8 | 0          | 1.07548421 |
| chr2 | 220474444 | 220561475 | 87032  | 3  | 2 | 3 | 0.61140001 | 0.01598258 | 0         | 7 | 0          | 0.84395715 |
| chr2 | 220561475 | 220561534 | 60     | 1  | 2 | 3 | 0.61140001 | 0.0079614  | 0         | 8 | 0          | 1.07548421 |
| chr2 | 220561534 | 220697256 | 135723 | 1  | 1 | 3 | 0.30102999 | 0.03070643 | 0         | 6 | 0          | 0.63695542 |
| chr2 | 220697256 | 220813776 | 116521 | 1  | 1 | 3 | 0.30102999 | 0.05670724 | 0         | 5 | 0          | 0.45545077 |
| chr2 | 220813776 | 220988286 | 174511 | 1  | 0 | 2 | 0          | 0.1575501  | 0         | 2 | 0          | 0.1575501  |
| chr2 | 220988286 | 221059983 | 71698  | 2  | 0 | 2 | 0          | 0.08289318 | 0         | 3 | 0          | 0.30102999 |
| chr2 | 221059983 | 221060042 | 60     | 1  | 0 | 3 | 0          | 0.17593012 | 0         | 3 | 0          | 0.17593012 |
| chr2 | 221060042 | 221148418 | 88377  | 1  | 0 | 2 | 0          | 0.1575501  | 0         | 2 | 0          | 0.1575501  |
| chr2 | 221148418 | 221542658 | 394241 | 4  | 0 | 2 | 0          | 0.30102999 | 0         | 1 | 0          | 0.05404976 |
| chr2 | 221542658 | 221867870 | 325213 | 3  | 0 | 2 | 0          | 0          | 0.1575501 | 0 | 2          | 0.1575501  |
| chr2 | 221867870 | 221975079 | 107210 | 2  | 0 | 3 | 0          | 0.17593012 | 0         | 3 | 0          | 0.17593012 |
| chr2 | 221975079 | 222252339 | 277261 | 2  | 0 | 2 | 0          | 0.08289318 | 0         | 3 | 0          | 0.30102999 |
| chr2 | 222252339 | 222308259 | 55021  | 1  | 0 | 2 | 0          | 0.0472175  | 0         | 4 | 0          | 0.47744371 |
| chr2 | 222308259 | 222347103 | 38845  | 1  | 0 | 2 | 0          | 0.08289318 | 0         | 3 | 0          | 0.30102999 |
| chr2 | 222347103 | 222429081 | 81979  | 2  | 0 | 2 | 0          | 0.1575501  | 0         | 2 | 0          | 0.1575501  |
| chr2 | 222429081 | 223308421 | 879441 | 15 | 0 | 2 | 0          | 0.08289318 | 0         | 3 | 0          | 0.30102999 |
| chr2 | 223308421 | 223389260 | 80840  | 2  | 0 | 2 | 0          | 0.1575501  | 0         | 2 | 0          | 0.1575501  |
| chr2 | 223389260 | 223574560 | 185301 | 6  | 0 | 2 | 0          | 0.08289318 | 0         | 3 | 0          | 0.30102999 |
| chr2 | 223574560 | 223746522 | 171963 | 2  | 0 | 2 | 0          | 0.1575501  | 0         | 2 | 0          | 0.1575501  |
| chr2 | 223746522 | 223746581 | 60     | 1  | 0 | 2 | 0          | 0.08289318 | 1         | 3 | 0.30102999 | 0.30102999 |
| chr2 | 223746581 | 223864544 | 117964 | 0  | 0 | 2 | 0          | 0.08289318 | 0         | 3 | 0          | 0.30102999 |
| chr2 | 223864544 | 224312511 | 447968 | 8  | 0 | 3 | 0          | 0.17593012 | 0         | 3 | 0          | 0.17593012 |
| chr2 | 224312511 | 224406198 | 93688  | 2  | 0 | 0 | 0          | 0.10122019 | 0         | 4 | 0          | 0.30102999 |
| chr2 | 224406198 | 224462205 | 56008  | 2  | 0 | 3 | 0          | 0.05670724 | 0         | 5 | 0          | 0.45545077 |
| chr2 | 224462205 | 224642532 | 180328 | 3  | 0 | 3 | 0          | 0.10122019 | 0         | 4 | 0          | 0.30102999 |
| chr2 | 224642532 | 224666777 | 24246  | 2  | 0 | 3 | 0          | 0.05670724 | 0         | 5 | 0          | 0.45545077 |
| chr2 | 224666777 | 224706849 | 40073  | 2  | 0 | 3 | 0          | 0.03070643 | 0         | 6 | 0          | 0.63695542 |
| chr2 | 224706849 | 224741506 | 34658  | 1  | 0 | 3 | 0          | 0.10122019 | 0         | 4 | 0          | 0.30102999 |
| chr2 | 224741506 | 224741565 | 60     | 1  | 0 | 3 | 0          | 0.05670724 | 0         | 5 | 0          | 0.45545077 |
| chr2 | 224741565 | 224787064 | 45500  | 2  | 0 | 3 | 0          | 0.10122019 | 0         | 4 | 0          | 0.30102999 |
| chr2 | 224787064 | 224787123 | 60     | 1  | 0 | 3 | 0          | 0.05670724 | 0         | 5 | 0          | 0.45545077 |
| chr2 | 224787123 | 224830160 | 43038  | 1  | 0 | 3 | 0          | 0.10122019 | 0         | 4 | 0          | 0.30102999 |
| chr2 | 224830160 | 224864014 | 33855  | 3  | 0 | 3 | 0          | 0.03070643 | 0         | 6 | 0          | 0.63695542 |
| chr2 | 224864014 | 225053772 | 189759 | 5  | 0 | 2 | 0          | 0.0429175  | 0         | 4 | 0          | 0.47744371 |
| chr2 | 225053772 | 225107864 | 54093  | 2  | 0 | 2 | 0          | 0.01053319 | 0         | 6 | 0          | 0.91219088 |
| chr2 | 225107864 | 225243447 | 135584 | 2  | 0 | 2 | 0          | 0.00493743 | 0         | 7 | 0          | 1.16581773 |
| chr2 | 225243447 | 225244553 | 1107   | 2  | 0 | 3 | 0          | 0.01598258 | 0         | 7 | 0          | 0.84395715 |
| chr2 | 225244553 | 225336951 | 92399  | 2  | 0 | 2 | 0          | 0.00493743 | 0         | 7 | 0          | 1.16581773 |
| chr2 | 225336951 | 225422472 | 85522  | 2  | 0 | 2 | 0          | 0.01053319 | 0         | 6 | 0          | 0.91219088 |
| chr2 | 225422472 | 225470188 | 47717  | 3  | 0 | 2 | 0          | 0.00493743 | 0         | 7 | 0          | 1.16581773 |
| chr2 | 225470188 | 225470247 | 60     | 1  | 0 | 3 | 0          | 0.01598258 | 0         | 7 | 0          | 0.84395715 |
| chr2 | 225470247 | 225630226 | 159980 | 4  | 0 | 2 | 0          | 0.00493743 | 0         | 7 | 0          | 1.16581773 |
| chr2 | 225630226 | 225707064 | 76839  | 1  | 0 | 4 | 0          | 0.00221948 | 0         | 8 | 0          | 1.44210395 |
| chr2 | 225707064 | 225837099 | 130036 | 2  | 0 | 2 | 0          | 0.01053319 | 0         | 6 | 0          | 0.91219088 |
| chr2 | 225837099 | 225945697 | 108599 | 2  | 0 | 2 | 0          | 0.02162467 | 0         | 5 | 0          | 0.68214471 |
| chr2 | 225945697 | 226092485 | 146789 | 1  | 0 | 2 | 0          | 0.08289318 | 0         | 3 | 0          | 0.30102999 |
| chr2 | 226092485 | 226427293 | 334809 | 5  | 0 | 1 | 0          | 0.05404976 | 0         | 2 | 0          | 0.30102999 |
| chr2 | 226427293 | 227025192 | 597900 | 6  | 0 | 1 | 0          | 0.1218695  | 0         | 1 | 0          | 0.1218695  |
| chr2 | 227025192 | 22732936  | 307745 | 3  | 0 | 2 | 0          | 0.1575501  | 0         | 2 | 0          | 0.1575501  |
| chr2 | 22732936  | 22732995  | 60     | 1  | 0 | 2 | 0          | 0.0429175  | 0         | 4 | 0          | 0.47744371 |
| chr2 | 22732995  | 227677913 | 344919 | 5  | 0 | 2 | 0          | 0.08289318 | 0         | 3 | 0          | 0.30102999 |
| chr2 | 227677913 | 227723111 | 45199  | 2  | 0 | 2 | 0          | 0.1575501  | 0         | 2 | 0          | 0.1575501  |
| chr2 | 227723111 | 227771631 | 48521  | 2  | 0 | 2 | 0          | 0.08289318 | 0         | 3 | 0          | 0.30102999 |
| chr2 | 227771631 | 227771686 | 56     | 1  | 0 | 2 | 0          | 0.0429175  | 0         | 4 | 0          | 0.47744371 |
| chr2 | 227771686 | 228032209 | 260524 | 9  | 0 | 1 | 0          | 0.02438896 | 0         | 3 | 0          | 0.51676182 |
| chr2 | 228032209 | 228142296 | 110088 | 4  | 0 | 1 | 0          | 0.0191641  | 0         | 4 | 0          | 0.76005302 |
| chr2 | 228142296 | 228419217 | 276923 | 7  | 0 | 2 | 0          | 0.0343896  | 0         | 3 | 0          | 0.51676182 |
| chr2 | 228419217 | 228419276 | 60     | 1  | 0 | 1 | 0          | 0.00240627 | 0         | 6 | 0          | 1.31802626 |
| chr2 | 228419276 | 228579881 | 160606 | 3  | 0 | 1 | 0          | 0.02438896 | 0         | 3 | 0          | 0.51676182 |
| chr2 | 228579881 | 228767785 | 187905 | 4  | 0 | 1 | 0          | 0.00478973 | 0         | 5 | 0          | 1.02641391 |
| chr2 | 228767785 | 228789218 | 21434  | 3  | 0 | 2 | 0          | 0.01053319 | 0         | 6 | 0          | 0.91219088 |
| chr2 | 228789218 | 228856979 | 67762  | 1  | 0 | 2 | 0          | 0.02162467 | 0         | 5 | 0          | 0.68214471 |
| chr2 | 228856979 | 229030046 | 173068 | 3  | 0 | 2 | 0          | 0.0429175  | 0         | 4 | 0          | 0.47744371 |
| chr2 | 229030046 | 229284538 | 254493 | 2  | 0 | 2 | 0          | 0.1575501  | 0         | 2 | 0          | 0.1575501  |
| chr2 | 229284538 | 229284597 | 60     | 1  | 0 | 2 | 0          | 0.0429175  | 0         | 4 | 0          | 0.47744371 |
| chr2 | 229284597 | 229409257 | 124661 | 1  | 0 | 2 | 0          | 0.08289318 | 0         | 3 | 0          | 0.30102999 |
| chr2 | 229409257 | 229542588 | 133332 | 1  | 0 | 2 | 0          | 0.1575501  | 0         | 2 | 0          | 0.1575501  |
| chr2 | 229542588 | 229644717 | 102130 | 2  | 0 | 3 | 0          | 0.17593012 | 0         | 3 | 0          | 0.17593012 |
| chr2 | 229644717 | 229755076 | 110360 | 2  | 0 | 4 | 0          | 0.30102999 | 0         | 3 | 0          | 0.10122019 |
| chr2 | 229755076 | 229755135 | 60     | 1  | 0 | 4 | 0          | 0.18734596 | 0         | 4 | 0          | 0.18734596 |
| chr2 | 229755135 | 229849823 | 94689  | 1  | 0 | 3 | 0          | 0.30102999 | 0         | 2 | 0          | 0.08289318 |
| chr2 | 229849823 | 229930751 | 80929  | 2  | 0 | 3 | 0          | 0.17593012 | 0         | 3 | 0          | 0.17593012 |
| chr2 | 229930751 | 230102420 | 171670 | 4  | 0 | 3 | 0          | 0.30102999 | 0         | 2 | 0          | 0.08289318 |
| chr2 | 230102420 | 230102479 | 60     | 1  | 0 | 4 | 0          | 0.11390336 | 0         | 5 | 0          | 0.30102999 |
| chr2 | 230102479 | 230161616 | 59138  | 1  | 0 | 4 | 0          | 0.30102999 | 0         | 3 | 0          | 0.10122019 |
| chr2 | 230161616 | 230272278 | 110663 | 4  | 0 | 4 | 0          | 0.18734596 | 0         | 4 | 0          | 0.18734596 |
| chr2 | 230272278 | 230294609 | 22332  | 1  | 0 | 4 | 0          | 0.30102999 | 0         | 3 | 0          | 0.10122019 |
| chr2 | 230294609 | 230294668 | 60     | 1  | 0 | 5 | 0          | 0.30102999 | 0         | 4 | 0          | 0.11390336 |
| chr2 | 230294668 | 230357931 | 63264  | 1  | 0 | 3 | 0          | 0.10122019 | 0         | 4 | 0          | 0.30102999 |
| chr2 | 230357931 | 230411764 | 53834  | 2  | 0 | 3 | 0          | 0.05670724 | 0         | 5 | 0          | 0.45545077 |
| chr2 | 230411764 | 230575419 | 163656 | 5  | 0 | 4 | 0          | 0.11390336 | 0         | 5 | 0          | 0.30102999 |
| chr2 | 230575419 | 230724038 | 148620 | 3  | 0 | 2 | 0          | 0.0429175  | 0         | 4 | 0          | 0.47744371 |
| chr2 | 230724038 | 230994184 | 270147 | 7  | 0 | 2 | 0          | 0.01053319 | 0         | 6 | 0          | 0.91219088 |
| chr2 | 230994184 | 231079796 | 85613  | 3  | 0 | 2 | 0          | 0.00493743 | 0         | 7 | 0          | 1.16581773 |
| chr2 | 231079796 | 231079855 | 60     | 1  | 0 | 3 | 0          | 0.01598258 | 0         | 7 | 0          | 0.84395715 |
| chr2 | 231079855 | 231132544 | 52690  | 1  | 0 | 3 | 0          | 0.03070643 | 0         | 6 | 0          | 0.63695542 |
| chr2 | 231132544 | 231159229 | 26686  | 2  | 0 | 3 | 0          | 0.01598258 | 0         | 7 | 0          | 0.84395715 |
| chr2 | 231159229 | 231159288 | 60     | 1  | 0 | 3 | 0          | 0.0079614  | 0         | 8 | 0          | 1.07548421 |
| chr2 | 231159288 | 231267663 | 108376 | 2  | 0 | 2 | 0          | 0.00493743 | 0         | 7 | 0          | 1.16581773 |
| chr2 | 231267663 | 231314338 | 46676  | 1  | 0 | 2 | 0          | 0.01053319 | 0         | 6 | 0          | 0.91219088 |
| chr2 | 231314338 | 231338227 | 23890  | 2  | 0 | 2 | 0          | 0.00493743 | 0         | 7 | 0          | 1.16581773 |

|      |           |           |        |    |   |   |            |            |    |    |            |            |
|------|-----------|-----------|--------|----|---|---|------------|------------|----|----|------------|------------|
| chr2 | 233638297 | 233641208 | 2912   | 1  | 1 | 5 | 0.30102999 | 0.07511598 | 0  | 7  | 0          | 0.43181735 |
| chr2 | 233641208 | 233677097 | 35890  | 1  | 1 | 4 | 0.30102999 | 0.03812622 | 0  | 7  | 0          | 0.60763643 |
| chr2 | 233677097 | 233710442 | 33346  | 2  | 0 | 4 | 0.30102999 | 0.02074938 | 0  | 8  | 0          | 0.79906872 |
| chr2 | 233710442 | 233785208 | 74767  | 3  | 1 | 5 | 0.30102999 | 0.04407651 | 0  | 8  | 0          | 0.58747015 |
| chr2 | 233785208 | 233785260 | 53     | 1  | 1 | 5 | 0.1218695  | 0.04407651 | 1  | 8  | 0.1218695  | 0.58747015 |
| chr2 | 233785260 | 233839404 | 54145  | 2  | 1 | 5 | 0.30102999 | 0.04407651 | 0  | 8  | 0          | 0.58747015 |
| chr2 | 233839404 | 233839461 | 58     | 1  | 1 | 5 | 0.1218695  | 0.04407651 | 1  | 8  | 0.1218695  | 0.58747015 |
| chr2 | 233839461 | 233897931 | 58471  | 2  | 1 | 5 | 0.30102999 | 0.04407651 | 0  | 8  | 0          | 0.58747015 |
| chr2 | 233897931 | 233944109 | 46179  | 2  | 1 | 5 | 0.1218695  | 0.02473314 | 1  | 9  | 0.1218695  | 0.76806864 |
| chr2 | 233944109 | 234087008 | 142900 | 2  | 1 | 4 | 0.30102999 | 0.02074938 | 0  | 8  | 0          | 0.79906872 |
| chr2 | 234087008 | 234296830 | 209823 | 5  | 1 | 4 | 0.30102999 | 0.01077081 | 0  | 9  | 0          | 1.01542894 |
| chr2 | 234296830 | 234380754 | 83925  | 2  | 1 | 4 | 0.30102999 | 0.02074938 | 0  | 8  | 0          | 0.79906872 |
| chr2 | 234380754 | 234473239 | 92486  | 2  | 1 | 4 | 0.30102999 | 0.06713722 | 0  | 6  | 0          | 0.44141547 |
| chr2 | 234473239 | 234546256 | 73018  | 2  | 1 | 3 | 0.30102999 | 0.03070643 | 0  | 6  | 0          | 0.63695542 |
| chr2 | 234546256 | 234602276 | 56021  | 2  | 0 | 3 | 0          | 0.03070643 | 0  | 6  | 0          | 0.63695542 |
| chr2 | 234602276 | 234705903 | 103628 | 4  | 1 | 3 | 0.30102999 | 0.03070643 | 0  | 6  | 0          | 0.63695542 |
| chr2 | 234705903 | 234761518 | 55616  | 3  | 1 | 3 | 0.30102999 | 0.05670724 | 0  | 5  | 0          | 0.45545077 |
| chr2 | 234761518 | 235178141 | 416624 | 6  | 1 | 3 | 0.30102999 | 0.10122019 | 0  | 4  | 0          | 0.30102999 |
| chr2 | 235178141 | 235178200 | 60     | 1  | 1 | 3 | 0.30102999 | 0.05670724 | 0  | 5  | 0          | 0.45545077 |
| chr2 | 235178200 | 235313304 | 135105 | 1  | 1 | 2 | 0.30102999 | 0.0429175  | 0  | 4  | 0          | 0.47744371 |
| chr2 | 235313304 | 235498909 | 186506 | 3  | 1 | 1 | 0.30102999 | 0.02438906 | 0  | 3  | 0          | 0.51676182 |
| chr2 | 235498909 | 235498968 | 60     | 1  | 1 | 2 | 0.30102999 | 0.0429175  | 0  | 4  | 0          | 0.47744371 |
| chr2 | 235498968 | 235670827 | 170960 | 1  | 0 | 2 | 0          | 0.0429175  | 0  | 0  | 0          | 0.47744371 |
| chr2 | 235670827 | 235670886 | 60     | 1  | 1 | 3 | 0          | 0.05670724 | 0  | 5  | 0          | 0.45545077 |
| chr2 | 235670886 | 235875361 | 204476 | 2  | 0 | 2 | 0          | 0.1575501  | 0  | 2  | 0          | 0.1575501  |
| chr2 | 235875361 | 235904817 | 29457  | 1  | 0 | 1 | 0          | 0.05404976 | 0  | 2  | 0          | 0.30102999 |
| chr2 | 235904817 | 235950587 | 45771  | 1  | 0 | 1 | 0          | 0.1218695  | 0  | 1  | 0          | 0.1218695  |
| chr2 | 235950587 | 236008523 | 57937  | 1  | 0 | 1 | 0          | 0.30102999 | 0  | 1  | 0          | 0.05404976 |
| chr2 | 236008523 | 236114456 | 105934 | 2  | 0 | 2 | 0          | 0.08289318 | 0  | 3  | 0          | 0.30102999 |
| chr2 | 236114456 | 236114515 | 60     | 1  | 1 | 2 | 0.30102999 | 0.0429175  | 0  | 4  | 0          | 0.47744371 |
| chr2 | 236114515 | 236247753 | 133239 | 1  | 0 | 2 | 0          | 0.0429175  | 0  | 4  | 0          | 0.47744371 |
| chr2 | 236247753 | 236337127 | 89475  | 2  | 0 | 2 | 0          | 0.00493743 | 0  | 7  | 0          | 1.16581773 |
| chr2 | 236337127 | 236337186 | 60     | 1  | 0 | 2 | 0          | 9.54E-04   | 0  | 0  | 0          | 1.74076927 |
| chr2 | 236337186 | 236429985 | 92800  | 1  | 0 | 2 | 0          | 0.00493743 | 0  | 7  | 0          | 1.16581773 |
| chr2 | 236429985 | 236470407 | 40423  | 2  | 0 | 3 | 0          | 0.01598258 | 0  | 7  | 0          | 0.84395715 |
| chr2 | 236470407 | 236532351 | 61945  | 1  | 0 | 3 | 0          | 0.03070643 | 0  | 6  | 0          | 0.63695542 |
| chr2 | 236532351 | 236640344 | 107994 | 3  | 0 | 3 | 0          | 0.01598258 | 0  | 7  | 0          | 0.84395715 |
| chr2 | 236640344 | 236795731 | 155388 | 3  | 0 | 3 | 0          | 0.03070643 | 0  | 6  | 0          | 0.63695542 |
| chr2 | 236795731 | 236795790 | 60     | 1  | 0 | 3 | 0          | 0.0079614  | 0  | 8  | 0          | 1.07548421 |
| chr2 | 236795790 | 236905033 | 109244 | 2  | 0 | 3 | 0          | 0.05670724 | 0  | 5  | 0          | 0.45545077 |
| chr2 | 236905033 | 236933820 | 28788  | 2  | 0 | 3 | 0          | 0.01598258 | 0  | 7  | 0          | 0.84395715 |
| chr2 | 236933820 | 237133520 | 199701 | 3  | 0 | 3 | 0          | 0.05670724 | 0  | 5  | 0          | 0.45545077 |
| chr2 | 237133520 | 237165845 | 32326  | 2  | 0 | 3 | 0          | 0.01598258 | 0  | 7  | 0          | 0.84395715 |
| chr2 | 237165845 | 237232835 | 66991  | 1  | 0 | 3 | 0          | 0.03070643 | 0  | 6  | 0          | 0.63695542 |
| chr2 | 237232835 | 237276063 | 43229  | 2  | 0 | 3 | 0          | 0.05670724 | 0  | 5  | 0          | 0.45545077 |
| chr2 | 237276063 | 237422530 | 146468 | 5  | 0 | 3 | 0          | 0.03070643 | 0  | 6  | 0          | 0.63695542 |
| chr2 | 237422530 | 237422589 | 60     | 1  | 0 | 4 | 0          | 0.03812622 | 0  | 7  | 0          | 0.60763643 |
| chr2 | 237422589 | 237490861 | 68273  | 1  | 0 | 4 | 0          | 0.06713722 | 0  | 6  | 0          | 0.44141547 |
| chr2 | 237490861 | 237795183 | 304323 | 4  | 0 | 4 | 0          | 0.03812622 | 0  | 7  | 0          | 0.60763643 |
| chr2 | 237795183 | 237795242 | 60     | 1  | 0 | 4 | 0          | 0.01077081 | 1  | 9  | 0.30102999 | 1.01542894 |
| chr2 | 237795242 | 237875465 | 80224  | 2  | 0 | 4 | 0          | 0.02074938 | 1  | 8  | 0.30102999 | 0.79906872 |
| chr2 | 237875465 | 238001694 | 126230 | 1  | 0 | 3 | 0          | 0.0079614  | 1  | 8  | 0.30102999 | 1.07548421 |
| chr2 | 238001694 | 238006797 | 5104   | 2  | 0 | 4 | 0          | 0.01077081 | 1  | 9  | 0.30102999 | 1.01542894 |
| chr2 | 238006797 | 238216063 | 209267 | 1  | 0 | 3 | 0          | 0.00378107 | 1  | 9  | 0.30102999 | 1.33111237 |
| chr2 | 238216063 | 238216122 | 60     | 1  | 0 | 4 | 0          | 0.01077081 | 1  | 9  | 0.30102999 | 1.01542894 |
| chr2 | 238216122 | 238287801 | 71680  | 2  | 0 | 3 | 0          | 0.00378107 | 1  | 9  | 0.30102999 | 1.33111237 |
| chr2 | 238287801 | 238369689 | 81889  | 2  | 0 | 3 | 0          | 0.0079614  | 1  | 8  | 0.30102999 | 1.07548421 |
| chr2 | 238369689 | 238440095 | 70407  | 2  | 0 | 3 | 0          | 0.01598258 | 1  | 7  | 0.30102999 | 0.84395715 |
| chr2 | 238440095 | 238482937 | 42843  | 4  | 0 | 3 | 0          | 0.0079614  | 1  | 8  | 0.30102999 | 1.07548421 |
| chr2 | 238482937 | 238525319 | 42383  | 3  | 0 | 3 | 0          | 0.00378107 | 1  | 9  | 0.30102999 | 1.33111237 |
| chr2 | 238525319 | 238619349 | 94031  | 2  | 0 | 3 | 0          | 0.0079614  | 1  | 8  | 0.30102999 | 1.07548421 |
| chr2 | 238619349 | 238950601 | 331253 | 10 | 1 | 3 | 0.1218695  | 0.00378107 | 1  | 9  | 0.1218695  | 1.33111237 |
| chr2 | 238950601 | 239185794 | 235194 | 9  | 1 | 4 | 0.1218695  | 0.01077081 | 1  | 9  | 0.1218695  | 1.01542894 |
| chr2 | 239185794 | 239237421 | 51628  | 2  | 1 | 4 | 0.1218695  | 0.00247414 | 11 | 11 | 0.1218695  | 1.52371709 |
| chr2 | 239237421 | 239237480 | 60     | 1  | 0 | 4 | 0.1218695  | 0.00108487 | 1  | 12 | 0.1218695  | 1.81706455 |
| chr2 | 239237480 | 239341717 | 104238 | 3  | 1 | 4 | 0.1218695  | 0.00247414 | 11 | 11 | 0.1218695  | 1.52371709 |
| chr2 | 239341717 | 239363005 | 18289  | 1  | 0 | 4 | 0.1218695  | 0.00108487 | 1  | 12 | 0.1218695  | 1.81706455 |
| chr2 | 239363005 | 239665010 | 305006 | 4  | 0 | 4 | 0          | 0.00108487 | 1  | 12 | 0.30102999 | 1.81706455 |
| chr2 | 239665010 | 239860877 | 195868 | 3  | 1 | 4 | 0.1218695  | 0.00108487 | 1  | 12 | 0.1218695  | 1.81706455 |
| chr2 | 239860877 | 239860936 | 60     | 1  | 1 | 5 | 0.1218695  | 0.00317045 | 1  | 12 | 0.1218695  | 1.46403142 |
| chr2 | 239860936 | 239914182 | 53247  | 1  | 0 | 4 | 0.1218695  | 0.00108487 | 1  | 12 | 0.1218695  | 1.81706455 |
| chr2 | 239914182 | 240007003 | 92822  | 3  | 0 | 4 | 0          | 0.00108487 | 1  | 12 | 0.30102999 | 1.81706455 |
| chr2 | 240007003 | 240007062 | 60     | 1  | 1 | 5 | 0.1218695  | 0.00317045 | 1  | 12 | 0.1218695  | 1.46403142 |
| chr2 | 240007062 | 240105793 | 98732  | 2  | 0 | 5 | 0          | 0.00317045 | 1  | 12 | 0.30102999 | 1.46403142 |
| chr2 | 240105793 | 240404483 | 298691 | 8  | 1 | 5 | 0.1218695  | 0.00317045 | 1  | 12 | 0.1218695  | 1.46403142 |
| chr2 | 240404483 | 240548405 | 143923 | 3  | 1 | 5 | 0.1218695  | 0.00108487 | 1  | 12 | 0.1218695  | 1.81706455 |
| chr2 | 240548405 | 240640049 | 91645  | 2  | 1 | 4 | 0.1218695  | 0.00317045 | 1  | 12 | 0.1218695  | 1.46403142 |
| chr2 | 240640049 | 240880626 | 240578 | 4  | 1 | 4 | 0.1218695  | 0.00108487 | 1  | 12 | 0.1218695  | 1.81706455 |
| chr2 | 240880626 | 241070294 | 189676 | 8  | 1 | 4 | 0.1218695  | 0.00247414 | 1  | 11 | 0.1218695  | 1.52371709 |
| chr2 | 241070294 | 241446627 | 376334 | 10 | 1 | 4 | 0.1218695  | 0.00108487 | 1  | 12 | 0.1218695  | 1.81706455 |
| chr2 | 241446627 | 241588655 | 142029 | 3  | 1 | 4 | 0.1218695  | 0.00247414 | 1  | 11 | 0.1218695  | 1.52371709 |
| chr2 | 241588655 | 241739081 | 150427 | 4  | 1 | 4 | 0.1218695  | 0.00530919 | 1  | 10 | 0.1218695  | 1.25681219 |
| chr2 | 241739081 | 241811504 | 74244  | 2  | 1 | 4 | 0.1218695  | 0.01077081 | 1  | 9  | 0.1218695  | 1.01542894 |
| chr2 | 241811504 | 241826014 | 14511  | 2  | 1 | 4 | 0.1218695  | 0.00530919 | 1  | 10 | 0.1218695  | 1.25681219 |
| chr2 | 241826014 | 241830215 | 4202   | 2  | 1 | 4 | 0.1218695  | 0.00247414 | 1  | 11 | 0.1218695  | 1.52371709 |
| chr2 | 241830215 | 241909646 | 79432  | 1  | 1 | 4 | 0.1218695  | 0.01077081 | 1  | 9  | 0.1218695  | 1.01542894 |
| chr2 | 241909646 | 241959632 | 49987  | 1  | 1 | 4 | 0.1218695  | 0.02074938 | 1  | 8  | 0.1218695  | 0.79906872 |
| chr2 | 241959632 | 242038917 | 79286  | 2  | 1 | 4 | 0.1218695  | 0.00530919 | 1  | 10 | 0.1218695  | 1.25681219 |
| chr2 | 242038917 | 242066091 | 27175  | 3  | 1 | 4 | 0.1218695  | 0.00108487 | 1  | 12 | 0.1218695  | 1.81706455 |
| chr2 | 242066091 | 242260435 | 194345 | 5  | 1 | 4 | 0.1218695  | 0.00247414 | 1  | 11 | 0.1218695  | 1.52371709 |
| chr2 | 242260435 | 242405269 | 144835 | 4  | 1 | 4 | 0.1218695  | 0.00530919 | 1  | 10 | 0.1218695  | 1.25681219 |
| chr2 | 242405269 | 242440010 | 34742  | 2  | 1 | 4 | 0.1218695  | 0.00247414 | 1  | 11 | 0.1218695  | 1.52371709 |
| chr2 | 242440010 | 242440066 | 57     | 1  | 1 | 4 | 0.1218695  | 0.00108487 | 1  | 12 | 0.1218695  | 1.81706455 |
| chr2 | 242440066 | 242520838 | 80773  | 4  | 1 | 4 | 0.1218695  | 0.00530919 | 1  | 10 | 0.1218695  | 1.25681219 |
| chr2 | 242520838 | 242710466 | 18962  |    |   |   |            |            |    |    |            |            |

|      |          |          |        |    |   |   |            |              |   |   |            |            |
|------|----------|----------|--------|----|---|---|------------|--------------|---|---|------------|------------|
| chr3 | 2358583  | 2417896  | 59314  | 2  | 1 | 4 | 0.01091641 | 0.06713722   | 4 | 6 | 0.76005302 | 0.44141547 |
| chr3 | 2417896  | 2449418  | 31523  | 1  | 1 | 4 | 0.01091641 | 0.11390363   | 4 | 5 | 0.76005302 | 0.30102999 |
| chr3 | 2449418  | 2539073  | 89656  | 2  | 1 | 4 | 0.01091641 | 0.05670724   | 4 | 5 | 0.76005302 | 0.45545077 |
| chr3 | 2539073  | 2685713  | 146641 | 3  | 1 | 3 | 0.01091641 | 0.10122019   | 4 | 4 | 0.76005302 | 0.30102999 |
| chr3 | 2685713  | 2784019  | 98307  | 3  | 1 | 3 | 0.01091641 | 0.05670724   | 4 | 5 | 0.76005302 | 0.45545077 |
| chr3 | 2784019  | 2784078  | 60     | 1  | 1 | 3 | 0.01091641 | 0.01598258   | 4 | 7 | 0.76005302 | 0.84395715 |
| chr3 | 2784078  | 2962570  | 178493 | 3  | 1 | 3 | 0.01091641 | 0.03070643   | 4 | 6 | 0.76005302 | 0.63695542 |
| chr3 | 2962570  | 3212936  | 250367 | 5  | 1 | 3 | 0.01091641 | 0.01598258   | 4 | 7 | 0.76005302 | 0.84395715 |
| chr3 | 3212936  | 3260882  | 47947  | 1  | 1 | 3 | 0.01091641 | 0.03070643   | 4 | 6 | 0.76005302 | 0.63695542 |
| chr3 | 3260882  | 3260941  | 60     | 1  | 1 | 4 | 0.01091641 | 0.06713722   | 4 | 6 | 0.76005302 | 0.44141547 |
| chr3 | 3260941  | 3316827  | 55887  | 1  | 1 | 2 | 0.01091641 | 0.0429175    | 4 | 4 | 0.76005302 | 0.47744371 |
| chr3 | 3316827  | 3316886  | 60     | 1  | 2 | 2 | 0.0429175  | 0.02162467   | 4 | 5 | 0.47744371 | 0.68214471 |
| chr3 | 3316886  | 3490879  | 173994 | 2  | 2 | 2 | 0.0429175  | 0.0429175    | 4 | 4 | 0.47744371 | 0.47744371 |
| chr3 | 3490879  | 3490938  | 60     | 1  | 2 | 2 | 0.02162467 | 0.02162467   | 5 | 5 | 0.68214471 | 0.68214471 |
| chr3 | 3490938  | 3560835  | 69898  | 1  | 1 | 2 | 0.01091641 | 0.02162467   | 4 | 5 | 0.76005302 | 0.68214471 |
| chr3 | 3560835  | 3653346  | 92512  | 2  | 1 | 2 | 0.01091641 | 0.1053319    | 4 | 6 | 0.76005302 | 0.91219088 |
| chr3 | 3653346  | 3653405  | 60     | 1  | 2 | 2 | 0.02162467 | 0.1053319    | 5 | 6 | 0.68214471 | 0.91219088 |
| chr3 | 3653405  | 3754545  | 101141 | 1  | 1 | 2 | 0.01091641 | 0.08289318   | 4 | 3 | 0.76005302 | 0.30102999 |
| chr3 | 3754545  | 3837892  | 83348  | 2  | 1 | 2 | 0.00478973 | 0.00289318   | 3 | 3 | 1.02643191 | 0.30102999 |
| chr3 | 3837892  | 3887161  | 49270  | 2  | 3 | 3 | 0.02162467 | 0.10122019   | 5 | 4 | 0.68214471 | 0.30102999 |
| chr3 | 3887161  | 3969008  | 81848  | 2  | 2 | 2 | 0.02162467 | 0.0429175    | 3 | 4 | 0.68214471 | 0.37744371 |
| chr3 | 3969008  | 4027733  | 58726  | 2  | 2 | 3 | 0.02162467 | 0.10122019   | 5 | 4 | 0.68214471 | 0.30102999 |
| chr3 | 4027733  | 4273103  | 245371 | 5  | 2 | 2 | 0.02162467 | 0.0429175    | 5 | 4 | 0.68214471 | 0.47744371 |
| chr3 | 4273103  | 4273162  | 60     | 1  | 2 | 2 | 0.01053319 | 0.0429175    | 6 | 4 | 0.91219088 | 0.47744371 |
| chr3 | 4273162  | 4356005  | 82844  | 2  | 2 | 1 | 0.02162467 | 0.02438996   | 5 | 3 | 0.68214471 | 0.51676182 |
| chr3 | 4356005  | 4356052  | 48     | 1  | 2 | 2 | 0.02162467 | 0.0429175    | 5 | 4 | 0.68214471 | 0.47744371 |
| chr3 | 4356052  | 4475351  | 119300 | 2  | 1 | 1 | 0.02162467 | 0.05404976   | 5 | 2 | 0.68214471 | 0.30102999 |
| chr3 | 4475351  | 4475410  | 60     | 1  | 2 | 2 | 0.02162467 | 0.01091641   | 5 | 4 | 0.68214471 | 0.76005302 |
| chr3 | 4475410  | 4562627  | 87218  | 2  | 1 | 1 | 0.02162467 | 0.05404976   | 5 | 2 | 0.68214471 | 0.30102999 |
| chr3 | 4562627  | 5179888  | 617262 | 12 | 2 | 1 | 0.01053319 | 0.05404976   | 6 | 2 | 0.91219088 | 0.30102999 |
| chr3 | 5179888  | 5179947  | 60     | 1  | 3 | 1 | 0.03070643 | 0.05404976   | 6 | 2 | 0.63695542 | 0.30102999 |
| chr3 | 5179947  | 5218766  | 38820  | 1  | 1 | 1 | 0.00204627 | 0.05404976   | 6 | 2 | 1.31360226 | 0.30102999 |
| chr3 | 5218766  | 5285429  | 66664  | 1  | 1 | 0 | 0.00204627 | 0            | 6 | 2 | 1.31360226 | 0.61140001 |
| chr3 | 5285429  | 5427855  | 142427 | 1  | 0 | 0 | 0.00204627 | 0            | 6 | 1 | 1.31360226 | 0.30102999 |
| chr3 | 5427855  | 5695954  | 268100 | 1  | 1 | 0 | 0.00478973 | 0            | 5 | 1 | 1.02643191 | 0.30102999 |
| chr3 | 5695954  | 6063048  | 367095 | 2  | 1 | 0 | 0.00478973 | 0            | 5 | 0 | 1.02643191 | 0          |
| chr3 | 6063048  | 6063107  | 60     | 1  | 3 | 0 | 0.05670724 | 0            | 5 | 1 | 0.45545077 | 0.30102999 |
| chr3 | 6063107  | 6274495  | 211389 | 1  | 0 | 0 | 0.00478973 | 0            | 5 | 1 | 1.02643191 | 0.30102999 |
| chr3 | 6274495  | 6517841  | 243347 | 2  | 1 | 0 | 0.00478973 | 0            | 5 | 2 | 1.02643191 | 0.61140001 |
| chr3 | 6517841  | 6517900  | 60     | 1  | 2 | 2 | 0.00478973 | 0.1575501    | 5 | 2 | 1.02643191 | 0.1575501  |
| chr3 | 6517900  | 6665884  | 147985 | 2  | 1 | 2 | 0.01091641 | 0.1575501    | 4 | 2 | 0.76005302 | 0.1575501  |
| chr3 | 6665884  | 6665943  | 60     | 1  | 2 | 0 | 0.00478973 | 0.08289318   | 5 | 3 | 1.02643191 | 0.30102999 |
| chr3 | 6665943  | 6719025  | 53083  | 1  | 2 | 2 | 0.01091641 | 0.08289318   | 4 | 3 | 0.76005302 | 0.30102999 |
| chr3 | 6719025  | 6858404  | 139380 | 2  | 1 | 2 | 0.01091641 | 0.02162467   | 4 | 5 | 0.76005302 | 0.68214471 |
| chr3 | 6858404  | 6858463  | 60     | 1  | 2 | 2 | 0.1053319  | 0.1053319    | 6 | 6 | 0.91219088 | 0.91219088 |
| chr3 | 6858463  | 6969680  | 111218 | 2  | 2 | 2 | 0.00478973 | 0.02162467   | 5 | 5 | 1.02643191 | 0.68214471 |
| chr3 | 6969680  | 7028183  | 58504  | 2  | 2 | 2 | 0.1053319  | 0.00493743   | 6 | 7 | 0.91219088 | 1.16581773 |
| chr3 | 7028183  | 7189083  | 160901 | 3  | 1 | 2 | 0.00478973 | 0.01053319   | 5 | 6 | 1.02643191 | 0.91219088 |
| chr3 | 7189083  | 7222618  | 33536  | 2  | 3 | 2 | 0.03070643 | 0.1053319    | 6 | 6 | 0.63695542 | 0.91219088 |
| chr3 | 7222618  | 7281688  | 59071  | 1  | 3 | 2 | 0.05670724 | 0.01053319   | 5 | 6 | 0.45545077 | 0.91219088 |
| chr3 | 7281688  | 7281747  | 60     | 1  | 3 | 3 | 0.05670724 | 0.01598258   | 5 | 7 | 0.45545077 | 0.84395715 |
| chr3 | 7281747  | 7403750  | 122004 | 3  | 2 | 3 | 0.02162467 | 0.01598258   | 5 | 7 | 0.68214471 | 0.84395715 |
| chr3 | 7403750  | 7442823  | 39074  | 1  | 2 | 2 | 0.02162467 | 0.00493743   | 5 | 7 | 0.68214471 | 1.16581773 |
| chr3 | 7442823  | 7484425  | 41603  | 2  | 2 | 2 | 0.03070643 | 0.00493743   | 6 | 7 | 0.63695542 | 1.16581773 |
| chr3 | 7484425  | 7484484  | 60     | 1  | 3 | 3 | 0.03070643 | 0.01598258   | 6 | 7 | 0.63695542 | 0.84395715 |
| chr3 | 7484484  | 7591304  | 106821 | 2  | 2 | 2 | 0.03070643 | 0.1053319    | 6 | 6 | 0.63695542 | 0.91219088 |
| chr3 | 7591304  | 7674343  | 83040  | 3  | 2 | 2 | 0.03070643 | 0.00493743   | 6 | 7 | 0.63695542 | 1.16581773 |
| chr3 | 7674343  | 7747898  | 73556  | 2  | 3 | 2 | 0.05670724 | 0.00493743   | 7 | 7 | 0.45545077 | 1.16581773 |
| chr3 | 7747898  | 7845117  | 97220  | 2  | 3 | 2 | 0.05670724 | 0.1053319    | 5 | 6 | 0.45545077 | 0.91219088 |
| chr3 | 7845117  | 7960638  | 115522 | 2  | 2 | 2 | 0.03070643 | 0.00493743   | 6 | 7 | 0.63695542 | 1.16581773 |
| chr3 | 7960638  | 8141335  | 180698 | 1  | 3 | 2 | 0.03070643 | 0.1053319    | 6 | 6 | 0.63695542 | 0.91219088 |
| chr3 | 8141335  | 8141394  | 60     | 1  | 4 | 2 | 0.06713722 | 0.1053319    | 6 | 6 | 0.44141547 | 0.91219088 |
| chr3 | 8141394  | 8325115  | 183722 | 2  | 4 | 2 | 0.11390363 | 0.0429175    | 5 | 4 | 0.30102999 | 0.47744371 |
| chr3 | 8325115  | 8325174  | 60     | 1  | 4 | 2 | 0.06713722 | 0.0429175    | 6 | 4 | 0.44141547 | 0.47744371 |
| chr3 | 8325174  | 8466006  | 140833 | 2  | 4 | 2 | 0.06713722 | 0.08289318   | 6 | 3 | 0.44141547 | 0.30102999 |
| chr3 | 8466006  | 8527127  | 61122  | 1  | 4 | 2 | 0.06713722 | 0.1575501    | 6 | 4 | 0.44141547 | 0.1575501  |
| chr3 | 8527127  | 8615225  | 88099  | 3  | 4 | 2 | 0.06713722 | 0.08289318   | 6 | 4 | 0.44141547 | 0.30102999 |
| chr3 | 8615225  | 8681446  | 66222  | 1  | 3 | 1 | 0.03070643 | 0.02438996   | 6 | 3 | 0.63695542 | 0.51676182 |
| chr3 | 8681446  | 8749407  | 67962  | 1  | 3 | 1 | 0.03070643 | 0.05404976   | 6 | 2 | 0.63695542 | 0.30102999 |
| chr3 | 8749407  | 8881364  | 131958 | 2  | 3 | 1 | 0.05670724 | 0.05404976   | 5 | 2 | 0.45545077 | 0.30102999 |
| chr3 | 8881364  | 8945209  | 63846  | 2  | 3 | 1 | 0.03070643 | 0.05404976   | 6 | 2 | 0.63695542 | 0.30102999 |
| chr3 | 8945209  | 9211364  | 266156 | 5  | 3 | 1 | 0.05670724 | 0.05404976   | 5 | 2 | 0.45545077 | 0.30102999 |
| chr3 | 9211364  | 9273789  | 62426  | 2  | 3 | 1 | 0.05670724 | 0.02438996   | 5 | 3 | 0.45545077 | 0.51676182 |
| chr3 | 9273789  | 9273848  | 60     | 1  | 4 | 1 | 0.03812622 | 0.02438996   | 7 | 3 | 0.60763643 | 0.51676182 |
| chr3 | 9273848  | 9422487  | 148640 | 2  | 3 | 1 | 0.03070643 | 0.02438996   | 6 | 3 | 0.63695542 | 0.51676182 |
| chr3 | 9422487  | 9475984  | 53498  | 2  | 3 | 1 | 0.03070643 | 0.01091641   | 6 | 4 | 0.63695542 | 0.76005302 |
| chr3 | 9475984  | 9532384  | 56401  | 1  | 3 | 1 | 0.05670724 | 0.02438996   | 5 | 3 | 0.45545077 | 0.51676182 |
| chr3 | 9532384  | 9532443  | 60     | 1  | 3 | 1 | 0.05670724 | 0.01091641   | 5 | 4 | 0.45545077 | 0.76005302 |
| chr3 | 9532443  | 9576330  | 43888  | 1  | 3 | 1 | 0.05670724 | 0.02438996   | 5 | 3 | 0.45545077 | 0.51676182 |
| chr3 | 9576330  | 9616619  | 40290  | 2  | 4 | 1 | 0.06713722 | 0.02438996   | 6 | 4 | 0.44141547 | 0.51676182 |
| chr3 | 9616619  | 9695981  | 79363  | 2  | 4 | 1 | 0.06713722 | 0.01091641   | 6 | 4 | 0.44141547 | 0.51676182 |
| chr3 | 9695981  | 9845627  | 149647 | 5  | 4 | 1 | 0.06713722 | 0.00478973   | 6 | 5 | 0.44141547 | 1.02643191 |
| chr3 | 9845627  | 10185707 | 340081 | 9  | 3 | 0 | 0.03070643 | 0            | 6 | 5 | 0.63695542 | 1.60515106 |
| chr3 | 10185707 | 10185766 | 60     | 1  | 3 | 1 | 0.03070643 | 0.00478973   | 6 | 5 | 0.63695542 | 1.02643191 |
| chr3 | 10185766 | 10236010 | 50245  | 1  | 3 | 1 | 0.03070643 | 0.01091641   | 6 | 4 | 0.63695542 | 0.76005302 |
| chr3 | 10236010 | 10315736 | 79727  | 2  | 3 | 1 | 0.03070643 | 0.02438996   | 6 | 3 | 0.63695542 | 0.51676182 |
| chr3 | 10315736 | 10331281 | 15546  | 3  | 3 | 1 | 0.01598258 | 0.02438996   | 7 | 3 | 0.84395715 | 0.51676182 |
| chr3 | 10331281 | 10562542 | 231262 | 7  | 2 | 1 | 0.01053319 | 0.02438996   | 6 | 3 | 0.91219088 | 0.51676182 |
| chr3 | 10562542 | 10725151 | 162610 | 3  | 2 | 1 | 0.02162467 | 0.02438996   | 5 | 3 | 0.68214471 | 0.51676182 |
| chr3 | 10725151 | 10725210 | 60     | 1  | 2 | 1 | 0.00493743 | 0.02438996   | 7 | 3 | 1.16581773 | 0.51676182 |
| chr3 | 10725210 | 10823718 | 98509  | 1  | 2 | 1 | 0.01053319 | 0.02438996   | 6 | 3 | 0.91219088 | 0.51676182 |
| chr3 | 10823718 | 11207076 | 383359 | 7  | 2 | 1 | 0.02162467 | 0.02438996</ |   |   |            |            |

|      |          |          |        |    |   |   |            |            |            |   |            |            |            |
|------|----------|----------|--------|----|---|---|------------|------------|------------|---|------------|------------|------------|
| chr3 | 14220645 | 14236174 | 15530  | 2  | 1 | 4 | 0.00478973 | 0.02074938 | 5          | 8 | 1.02643191 | 0.79906872 |            |
| chr3 | 14236174 | 14756827 | 520654 | 12 | 1 | 4 | 0.00478973 | 0.03812622 | 5          | 7 | 1.02643191 | 0.60763643 |            |
| chr3 | 14756827 | 14833510 | 76684  | 2  | 1 | 4 | 0.01091641 | 0.03812622 | 4          | 7 | 0.76005302 | 0.60763643 |            |
| chr3 | 14833510 | 14938686 | 105177 | 3  | 1 | 4 | 0.00478973 | 0.03812622 | 5          | 7 | 1.02643191 | 0.60763643 |            |
| chr3 | 14938686 | 15007880 | 69195  | 3  | 2 | 4 | 0.02162467 | 0.03812622 | 4          | 7 | 0.68214471 | 0.60763643 |            |
| chr3 | 15007880 | 15113408 | 105529 | 3  | 2 | 4 | 0.0429175  | 0.03812622 | 4          | 7 | 0.47744371 | 0.60763643 |            |
| chr3 | 15113408 | 15126540 | 13133  | 2  | 2 | 4 | 0.02162467 | 0.03812622 | 5          | 7 | 0.68214471 | 0.60763643 |            |
| chr3 | 15126540 | 15160058 | 33519  | 1  | 2 | 4 | 0.0429175  | 0.03812622 | 4          | 7 | 0.47744371 | 0.60763643 |            |
| chr3 | 15160058 | 15218245 | 58188  | 1  | 2 | 4 | 0.0429175  | 0.06713722 | 4          | 6 | 0.47744371 | 0.44141547 |            |
| chr3 | 15218245 | 15218304 | 60     | 1  | 2 | 4 | 0.02162467 | 0.06713722 | 5          | 6 | 0.68214471 | 0.44141547 |            |
| chr3 | 15218304 | 15292837 | 74534  | 2  | 2 | 4 | 0.0429175  | 0.06713722 | 4          | 6 | 0.47744371 | 0.44141547 |            |
| chr3 | 15292837 | 15410270 | 117434 | 5  | 2 | 4 | 0.02162467 | 0.06713722 | 5          | 6 | 0.68214471 | 0.44141547 |            |
| chr3 | 15410270 | 15410329 | 60     | 1  | 2 | 4 | 0.02162467 | 0.03812622 | 5          | 7 | 0.68214471 | 0.60763643 |            |
| chr3 | 15410329 | 15541870 | 131542 | 4  | 2 | 4 | 0.02162467 | 0.11390336 | 5          | 5 | 0.68214471 | 0.30102999 |            |
| chr3 | 15541870 | 15577177 | 35308  | 1  | 2 | 4 | 0.02162467 | 0.18734596 | 5          | 4 | 0.68214471 | 0.18734596 |            |
| chr3 | 15577177 | 15610035 | 32859  | 2  | 2 | 4 | 0.01053319 | 0.18734596 | 6          | 4 | 0.91219088 | 0.18734596 |            |
| chr3 | 15610035 | 15643605 | 33571  | 1  | 2 | 4 | 0.02162467 | 0.18734596 | 5          | 4 | 0.68214471 | 0.18734596 |            |
| chr3 | 15643605 | 15683479 | 39875  | 3  | 2 | 4 | 0.02162467 | 0.11390336 | 5          | 5 | 0.68214471 | 0.30102999 |            |
| chr3 | 15683479 | 15806193 | 122715 | 2  | 2 | 4 | 0.02162467 | 0.18734596 | 5          | 4 | 0.68214471 | 0.18734596 |            |
| chr3 | 15806193 | 15930426 | 124234 | 4  | 2 | 3 | 0.02162467 | 0.17593012 | 5          | 3 | 0.68214471 | 0.17593012 |            |
| chr3 | 15930426 | 15989846 | 59421  | 2  | 2 | 3 | 0.02162467 | 0.05670724 | 5          | 5 | 0.68214471 | 0.45545077 |            |
| chr3 | 15989846 | 15989905 | 60     | 1  | 2 | 4 | 0.02162467 | 0.11390336 | 5          | 4 | 0.68214471 | 0.30102999 |            |
| chr3 | 15989905 | 16046188 | 56284  | 1  | 2 | 4 | 0.02162467 | 0.18734596 | 5          | 4 | 0.68214471 | 0.18734596 |            |
| chr3 | 16046188 | 16136229 | 90042  | 2  | 2 | 4 | 0.0429175  | 0.18734596 | 4          | 4 | 0.47744371 | 0.18734596 |            |
| chr3 | 16136229 | 16206839 | 70611  | 2  | 2 | 4 | 0.0429175  | 0.11390336 | 4          | 5 | 0.47744371 | 0.30102999 |            |
| chr3 | 16206839 | 16206898 | 60     | 1  | 2 | 4 | 0.0429175  | 0.06713722 | 4          | 6 | 0.47744371 | 0.44141547 |            |
| chr3 | 16206898 | 16322409 | 115512 | 3  | 2 | 4 | 0.0429175  | 0.11390336 | 4          | 5 | 0.47744371 | 0.30102999 |            |
| chr3 | 16322409 | 16336399 | 13991  | 2  | 2 | 4 | 0.0429175  | 0.03812622 | 4          | 7 | 0.47744371 | 0.60763643 |            |
| chr3 | 16336399 | 16372299 | 35901  | 1  | 2 | 3 | 0.08289318 | 0.01598258 | 7          | 7 | 0.30102999 | 0.84395715 |            |
| chr3 | 16372299 | 16447117 | 74819  | 2  | 3 | 2 | 0.1575501  | 0.01598258 | 2          | 7 | 0.1575501  | 0.84395715 |            |
| chr3 | 16447117 | 16447176 | 60     | 1  | 2 | 4 | 0.08289318 | 0.03812622 | 3          | 7 | 0.30102999 | 0.60763643 |            |
| chr3 | 16447176 | 16508412 | 61237  | 1  | 2 | 3 | 0.08289318 | 0.01598258 | 3          | 7 | 0.30102999 | 0.84395715 |            |
| chr3 | 16508412 | 16567573 | 59162  | 1  | 2 | 3 | 0.1575501  | 0.01598258 | 2          | 7 | 0.1575501  | 0.84395715 |            |
| chr3 | 16567573 | 16633512 | 65940  | 2  | 2 | 4 | 0.1575501  | 0.03812622 | 2          | 7 | 0.1575501  | 0.60763643 |            |
| chr3 | 16633512 | 16874601 | 241090 | 4  | 2 | 4 | 0.08289318 | 0.03812622 | 3          | 7 | 0.30102999 | 0.60763643 |            |
| chr3 | 16874601 | 16874660 | 60     | 1  | 2 | 4 | 0.0429175  | 0.03812622 | 4          | 7 | 0.47744371 | 0.60763643 |            |
| chr3 | 16874660 | 16955606 | 80947  | 2  | 2 | 4 | 0.08289318 | 0.06713722 | 3          | 6 | 0.30102999 | 0.44141547 |            |
| chr3 | 16955606 | 16955665 | 60     | 1  | 2 | 4 | 0.08289318 | 0.03812622 | 3          | 7 | 0.30102999 | 0.60763643 |            |
| chr3 | 16955665 | 17052125 | 96461  | 2  | 2 | 4 | 0.08289318 | 0.06713722 | 3          | 6 | 0.30102999 | 0.44141547 |            |
| chr3 | 17052125 | 17122660 | 70536  | 1  | 2 | 4 | 0.08289318 | 0.11390336 | 3          | 5 | 0.30102999 | 0.30102999 |            |
| chr3 | 17122660 | 17188340 | 65681  | 3  | 2 | 4 | 0.08289318 | 0.06713722 | 3          | 6 | 0.30102999 | 0.44141547 |            |
| chr3 | 17188340 | 17300010 | 111671 | 2  | 2 | 4 | 0.08289318 | 0.11390336 | 3          | 5 | 0.30102999 | 0.30102999 |            |
| chr3 | 17300010 | 17300069 | 60     | 1  | 2 | 4 | 0.08289318 | 0.06713722 | 3          | 6 | 0.30102999 | 0.44141547 |            |
| chr3 | 17300069 | 17338295 | 38227  | 1  | 2 | 4 | 0.08289318 | 0.11390336 | 3          | 5 | 0.30102999 | 0.30102999 |            |
| chr3 | 17338295 | 17372773 | 34479  | 1  | 2 | 4 | 0.1575501  | 0.11390336 | 2          | 5 | 0.1575501  | 0.30102999 |            |
| chr3 | 17372773 | 17372832 | 60     | 1  | 2 | 4 | 0.1575501  | 0.06713722 | 2          | 6 | 0.1575501  | 0.44141547 |            |
| chr3 | 17372832 | 17425472 | 52641  | 1  | 1 | 3 | 0.1218695  | 0.03070643 | 1          | 6 | 0.1218695  | 0.63695542 |            |
| chr3 | 17425472 | 17425531 | 60     | 1  | 1 | 3 | 0.05404976 | 0.03070643 | 2          | 6 | 0.30102999 | 0.63695542 |            |
| chr3 | 17425531 | 17550024 | 124494 | 2  | 1 | 3 | 0.1218695  | 0.03070643 | 1          | 6 | 0.1218695  | 0.63695542 |            |
| chr3 | 17550024 | 17780990 | 230967 | 5  | 1 | 3 | 0.1218695  | 0.01598258 | 1          | 7 | 0.1218695  | 0.84395715 |            |
| chr3 | 17780990 | 17981748 | 200759 | 2  | 1 | 3 | 0.30102999 | 0.01598258 | 0          | 7 | 0.1218695  | 0.84395715 |            |
| chr3 | 17981748 | 17981807 | 60     | 1  | 1 | 3 | 0.1218695  | 0.01598258 | 1          | 7 | 0.1218695  | 0.84395715 |            |
| chr3 | 17981807 | 18119539 | 137733 | 1  | 1 | 3 | 0.30102999 | 0.05670724 | 0          | 5 | 0          | 0.45545077 |            |
| chr3 | 18119539 | 18181903 | 62365  | 1  | 1 | 2 | 0.30102999 | 0.0429175  | 0          | 4 | 0          | 0.47744371 |            |
| chr3 | 18181903 | 18402001 | 220099 | 2  | 0 | 2 | 0          | 0.08289318 | 0          | 3 | 0          | 0.30102999 |            |
| chr3 | 18402001 | 18608409 | 206409 | 3  | 0 | 4 | 0          | 0.18734596 | 0          | 4 | 0          | 0.18734596 |            |
| chr3 | 18608409 | 18805698 | 197290 | 1  | 0 | 2 | 0          | 0.1575501  | 0          | 2 | 0          | 0.1575501  |            |
| chr3 | 18805698 | 18922247 | 116550 | 1  | 0 | 2 | 0          | 0.30102999 | 0          | 1 | 0          | 0.05404976 |            |
| chr3 | 18922247 | 19056029 | 133783 | 3  | 0 | 2 | 0          | 0.1575501  | 0          | 2 | 0          | 0.1575501  |            |
| chr3 | 19056029 | 19190174 | 134146 | 2  | 0 | 3 | 0          | 0.01598258 | 1          | 7 | 0.30102999 | 0.84395715 |            |
| chr3 | 19190174 | 19219352 | 29179  | 2  | 0 | 4 | 0          | 0.02074938 | 8          | 8 | 0.30102999 | 0.79906872 |            |
| chr3 | 19219352 | 19219411 | 60     | 1  | 1 | 5 | 0.1218695  | 0.04407651 | 8          | 8 | 0.1218695  | 0.58747015 |            |
| chr3 | 19219411 | 19295386 | 79576  | 1  | 4 | 4 | 0.1218695  | 0.02074938 | 1          | 8 | 0.1218695  | 0.79906872 |            |
| chr3 | 19295386 | 19431982 | 136597 | 3  | 0 | 1 | 0          | 0.02074938 | 8          | 8 | 0.30102999 | 0.79906872 |            |
| chr3 | 19431982 | 19432081 | 60     | 1  | 1 | 4 | 0          | 0.1218695  | 0.02074938 | 1 | 8          | 0.1218695  | 0.79906872 |
| chr3 | 19432081 | 19556893 | 124763 | 2  | 1 | 4 | 0.30102999 | 0.02074938 | 0          | 8 | 0.1218695  | 0.79906872 |            |
| chr3 | 19556893 | 19556862 | 60     | 1  | 1 | 4 | 0          | 0.1218695  | 0.02074938 | 1 | 8          | 0.1218695  | 0.79906872 |
| chr3 | 19556862 | 19940924 | 384063 | 4  | 1 | 3 | 0.1218695  | 0.03070643 | 1          | 6 | 0.1218695  | 0.63695542 |            |
| chr3 | 19940924 | 19992271 | 51348  | 2  | 1 | 3 | 0.1218695  | 0.01598258 | 1          | 7 | 0.1218695  | 0.84395715 |            |
| chr3 | 19992271 | 20214132 | 221862 | 9  | 1 | 4 | 0.1218695  | 0.03812622 | 1          | 7 | 0.1218695  | 0.60763643 |            |
| chr3 | 20214132 | 20321478 | 107347 | 2  | 2 | 2 | 0.30102999 | 0.01053319 | 0          | 6 | 0          | 0.91219088 |            |
| chr3 | 20321478 | 20452995 | 131518 | 1  | 0 | 2 | 0          | 0.02162467 | 1          | 0 | 0          | 0.68214471 |            |
| chr3 | 20452995 | 20595889 | 142895 | 1  | 0 | 1 | 0          | 0.01091641 | 0          | 4 | 0          | 0.76005302 |            |
| chr3 | 20595889 | 20742252 | 146364 | 2  | 1 | 1 | 0.1218695  | 0.00478973 | 1          | 5 | 0.1218695  | 1.02643191 |            |
| chr3 | 20742252 | 20972974 | 230723 | 3  | 1 | 3 | 0.1218695  | 0.03070643 | 1          | 6 | 0.1218695  | 0.63695542 |            |
| chr3 | 20972974 | 20973033 | 60     | 1  | 1 | 4 | 0.1218695  | 0.06713722 | 1          | 6 | 0.1218695  | 0.44141547 |            |
| chr3 | 20973033 | 21105079 | 132047 | 1  | 1 | 3 | 0.1218695  | 0.17593012 | 1          | 3 | 0.1218695  | 0.17593012 |            |
| chr3 | 21105079 | 21105138 | 60     | 1  | 1 | 0 | 0.05404976 | 0.17593012 | 2          | 3 | 0.30102999 | 0.17593012 |            |
| chr3 | 21105138 | 21176822 | 71685  | 1  | 0 | 3 | 0          | 0.17593012 | 1          | 3 | 0.30102999 | 0.17593012 |            |
| chr3 | 21176822 | 21462875 | 286054 | 2  | 0 | 3 | 0          | 0.30102999 | 0          | 2 | 0          | 0.08289318 |            |
| chr3 | 21462875 | 21462934 | 60     | 1  | 0 | 3 | 0          | 0.17593012 | 1          | 3 | 0.30102999 | 0.17593012 |            |
| chr3 | 21462934 | 21505542 | 42609  | 1  | 0 | 3 | 0          | 0.17593012 | 0          | 3 | 0          | 0.17593012 |            |
| chr3 | 21505542 | 21552397 | 46856  | 2  | 1 | 3 | 0.30102999 | 0.17593012 | 0          | 3 | 0          | 0.17593012 |            |
| chr3 | 21552397 | 21552452 | 56     | 1  | 2 | 3 | 0.1575501  | 0.10122019 | 2          | 4 | 0.1575501  | 0.30102999 |            |
| chr3 | 21552452 | 21974264 | 421813 | 8  | 2 | 3 | 0.30102999 | 0.10122019 | 1          | 4 | 0.05404976 | 0.30102999 |            |
| chr3 | 21974264 | 22035741 | 61478  | 1  | 1 | 3 | 0.1218695  | 0.10122019 | 1          | 4 | 0.1218695  | 0.30102999 |            |
| chr3 | 22035741 | 22035800 | 60     | 1  | 1 | 4 | 0.1218695  | 0.18734596 | 1          | 4 | 0.1218695  | 0.18734596 |            |
| chr3 | 22035800 | 22197035 | 161236 | 2  | 1 | 3 | 0.1218695  | 0.10122019 | 1          | 4 | 0.1218695  | 0.30102999 |            |
| chr3 | 22197035 | 22409736 | 212702 | 3  | 1 | 4 | 0.1218695  | 0.18734596 | 1          | 4 | 0.1218695  | 0.18734596 |            |
| chr3 | 22409736 | 22466137 | 56402  | 2  | 1 | 4 | 0.05404976 | 0.18734596 | 4          | 4 | 0.30102999 | 0.18734596 |            |
| chr3 | 22466137 | 22466196 | 60     | 1  | 2 | 4 | 0.08289318 | 0.18734596 | 3          | 4 | 0.30102999 | 0.18734596 |            |
| chr3 | 22466196 | 22550728 | 84533  | 2  | 2 | 4 | 0.1575501  | 0.18734596 | 2          | 4 | 0.157      |            |            |

|      |          |          |        |   |   |   |            |            |   |   |            |            |
|------|----------|----------|--------|---|---|---|------------|------------|---|---|------------|------------|
| chr3 | 25835866 | 26146266 | 310401 | 2 | 2 | 5 | 0.30102999 | 0.19510895 | 1 | 5 | 0.05404976 | 0.19510895 |
| chr3 | 26146266 | 26146325 | 60     | 1 | 2 | 5 | 0.30102999 | 0.12309572 | 1 | 6 | 0.05404976 | 0.30102999 |
| chr3 | 26146325 | 26396273 | 249949 | 1 | 1 | 4 | 0.1218695  | 0.06713722 | 1 | 6 | 0.1218695  | 0.44141547 |
| chr3 | 26396273 | 26396332 | 60     | 1 | 1 | 5 | 0.1218695  | 0.12309572 | 1 | 6 | 0.1218695  | 0.30102999 |
| chr3 | 26396332 | 26623695 | 227364 | 1 | 1 | 5 | 0.1218695  | 0.19510895 | 1 | 5 | 0.1218695  | 0.19510895 |
| chr3 | 26623695 | 26807485 | 183791 | 3 | 1 | 2 | 0.1218695  | 0.08289318 | 1 | 3 | 0.1218695  | 0.30102999 |
| chr3 | 26807485 | 26957381 | 148987 | 2 | 1 | 3 | 0.1218695  | 0.17593012 | 1 | 3 | 0.1218695  | 0.17593012 |
| chr3 | 26957381 | 26957440 | 60     | 1 | 1 | 3 | 0.1218695  | 0.05670274 | 1 | 5 | 0.1218695  | 0.45545077 |
| chr3 | 26957440 | 27104159 | 146720 | 1 | 1 | 2 | 0.1218695  | 0.02162467 | 1 | 5 | 0.1218695  | 0.68214471 |
| chr3 | 27104159 | 27269941 | 165783 | 4 | 1 | 2 | 0.1218695  | 0.1575501  | 1 | 2 | 0.1218695  | 0.1575501  |
| chr3 | 27269941 | 27326179 | 56239  | 3 | 1 | 2 | 0.1218695  | 0.0429175  | 1 | 4 | 0.1218695  | 0.47744371 |
| chr3 | 27326179 | 27416026 | 89848  | 2 | 1 | 1 | 0.1218695  | 0.01091641 | 1 | 4 | 0.1218695  | 0.76005302 |
| chr3 | 27416026 | 27478855 | 62830  | 3 | 1 | 1 | 0.1218695  | 0.00478973 | 1 | 5 | 0.1218695  | 1.02643191 |
| chr3 | 27478855 | 27478914 | 60     | 1 | 1 | 1 | 0.1218695  | 8.47E-04   | 1 | 7 | 0.1218695  | 1.62048027 |
| chr3 | 27478914 | 27639046 | 160133 | 2 | 1 | 1 | 0.1218695  | 0.00478973 | 1 | 5 | 0.1218695  | 1.02643191 |
| chr3 | 27639046 | 27851048 | 212003 | 3 | 1 | 1 | 0.1218695  | 0.01091641 | 1 | 4 | 0.1218695  | 0.76005302 |
| chr3 | 27851048 | 28025781 | 174734 | 2 | 1 | 1 | 0.1218695  | 0.00478973 | 1 | 5 | 0.1218695  | 1.02643191 |
| chr3 | 28025781 | 28025840 | 60     | 1 | 1 | 1 | 0.1218695  | 8.47E-04   | 1 | 7 | 0.1218695  | 1.62048027 |
| chr3 | 28025840 | 28252753 | 226914 | 1 | 1 | 1 | 0.1218695  | 0.00478973 | 1 | 5 | 0.1218695  | 1.02643191 |
| chr3 | 28252753 | 28252812 | 60     | 2 | 1 | 1 | 0.30102999 | 0.00478973 | 1 | 5 | 0.05404976 | 1.02643191 |
| chr3 | 28252812 | 28368072 | 115261 | 1 | 1 | 1 | 0.30102999 | 0.02438986 | 1 | 3 | 0.05404976 | 0.51676182 |
| chr3 | 28368072 | 28499551 | 131480 | 5 | 2 | 1 | 0.61140001 | 0.01091641 | 0 | 0 | 0          | 0          |
| chr3 | 28499551 | 28499610 | 60     | 1 | 1 | 1 | 0.61140001 | 0.01091641 | 0 | 0 | 0          | 0          |
| chr3 | 28499610 | 28616503 | 116894 | 2 | 2 | 0 | 0.61140001 | 0          | 0 | 3 | 0          | 0.93173516 |
| chr3 | 28616503 | 28616562 | 60     | 1 | 2 | 0 | 0.30102999 | 0          | 1 | 4 | 0.05404976 | 1.26272838 |
| chr3 | 28616562 | 28700624 | 84063  | 2 | 0 | 0 | 0.30102999 | 0          | 1 | 3 | 0.05404976 | 0.93173516 |
| chr3 | 28700624 | 28700683 | 60     | 1 | 1 | 1 | 0.51676182 | 0.02438986 | 1 | 3 | 0.02438986 | 0.51676182 |
| chr3 | 28700683 | 28815545 | 114863 | 1 | 1 | 1 | 0.51676182 | 0.05404976 | 1 | 2 | 0.02438986 | 0.30102999 |
| chr3 | 28815545 | 28952820 | 137276 | 2 | 1 | 1 | 0.51676182 | 0.01091641 | 1 | 4 | 0.02438986 | 0.76005302 |
| chr3 | 28952820 | 29046584 | 93765  | 2 | 1 | 1 | 0.51676182 | 0.00204627 | 1 | 6 | 0.02438986 | 1.31360226 |
| chr3 | 29046584 | 29114567 | 67984  | 2 | 3 | 1 | 0.51676182 | 8.47E-04   | 1 | 7 | 0.02438986 | 1.62048027 |
| chr3 | 29114567 | 29206087 | 91521  | 2 | 3 | 3 | 0.51676182 | 0.01598258 | 1 | 7 | 0.02438986 | 0.84395715 |
| chr3 | 29206087 | 29323063 | 116977 | 2 | 3 | 2 | 0.51676182 | 0.01053319 | 1 | 6 | 0.02438986 | 0.91219088 |
| chr3 | 29323063 | 29405895 | 82833  | 2 | 3 | 1 | 0.51676182 | 0.00204627 | 1 | 6 | 0.02438986 | 1.31360226 |
| chr3 | 29405895 | 29405954 | 60     | 1 | 3 | 2 | 0.51676182 | 0.01053319 | 1 | 6 | 0.02438986 | 0.91219088 |
| chr3 | 29405954 | 29565057 | 159104 | 4 | 3 | 1 | 0.51676182 | 0.00204627 | 1 | 6 | 0.02438986 | 1.31360226 |
| chr3 | 29565057 | 29596768 | 31712  | 2 | 3 | 3 | 0.51676182 | 0.03070643 | 1 | 6 | 0.02438986 | 0.63695542 |
| chr3 | 29596768 | 29643160 | 46393  | 1 | 3 | 1 | 0.51676182 | 0.00204627 | 1 | 6 | 0.02438986 | 1.31360226 |
| chr3 | 29643160 | 29692849 | 49690  | 1 | 2 | 1 | 0.30102999 | 0.00204627 | 1 | 6 | 0.05404976 | 1.31360226 |
| chr3 | 29692849 | 29804444 | 111596 | 3 | 2 | 1 | 0.30102999 | 0.03070643 | 1 | 6 | 0.05404976 | 0.63695542 |
| chr3 | 29804444 | 29997537 | 193094 | 4 | 3 | 3 | 0.30102999 | 0.03070643 | 2 | 6 | 0.08289318 | 0.63695542 |
| chr3 | 29997537 | 30032709 | 35173  | 2 | 3 | 3 | 0.30102999 | 0.01598258 | 2 | 7 | 0.08289318 | 0.84395715 |
| chr3 | 30032709 | 30226234 | 193526 | 2 | 3 | 3 | 0.30102999 | 0.03070643 | 6 | 6 | 0.08289318 | 0.63695542 |
| chr3 | 30226234 | 30226293 | 60     | 1 | 3 | 3 | 0.30102999 | 0.0079614  | 2 | 8 | 0.08289318 | 1.07548421 |
| chr3 | 30226293 | 30651199 | 424907 | 4 | 2 | 3 | 0.1575501  | 0.01598258 | 2 | 7 | 0.1575501  | 0.84395715 |
| chr3 | 30651199 | 30664495 | 13297  | 2 | 2 | 3 | 0.1575501  | 0.0079614  | 2 | 8 | 0.1575501  | 1.07548421 |
| chr3 | 30664495 | 30664793 | 299    | 2 | 3 | 3 | 0.1575501  | 0.00378107 | 2 | 9 | 0.1575501  | 1.33111237 |
| chr3 | 30664793 | 30759894 | 95102  | 4 | 2 | 3 | 0.05404976 | 0.0079614  | 2 | 8 | 0.30102999 | 1.07548421 |
| chr3 | 30759894 | 30795662 | 35769  | 1 | 4 | 4 | 0.05404976 | 0.02074938 | 1 | 8 | 0.30102999 | 0.79906872 |
| chr3 | 30795662 | 30856625 | 60964  | 2 | 1 | 3 | 0.05404976 | 0.0079614  | 2 | 8 | 0.30102999 | 1.07548421 |
| chr3 | 30856625 | 30995629 | 139005 | 1 | 3 | 3 | 0.05404976 | 0.00378107 | 2 | 9 | 0.30102999 | 1.33111237 |
| chr3 | 30995629 | 31120841 | 125213 | 3 | 1 | 3 | 0.1218695  | 0.00378107 | 1 | 9 | 0.1218695  | 1.33111237 |
| chr3 | 31120841 | 31120900 | 60     | 1 | 1 | 3 | 0.05404976 | 0.00378107 | 2 | 9 | 0.30102999 | 1.33111237 |
| chr3 | 31120900 | 31656667 | 535768 | 5 | 1 | 3 | 0.1218695  | 0.00378107 | 1 | 9 | 0.1218695  | 1.33111237 |
| chr3 | 31656667 | 31676611 | 19945  | 1 | 1 | 3 | 0.1218695  | 0.0079614  | 1 | 8 | 0.1218695  | 1.07548421 |
| chr3 | 31676611 | 31805724 | 129114 | 2 | 1 | 3 | 0.1218695  | 0.01598258 | 1 | 7 | 0.1218695  | 0.84395715 |
| chr3 | 31805724 | 31921241 | 115518 | 3 | 1 | 3 | 0.1218695  | 0.0079614  | 1 | 8 | 0.1218695  | 1.07548421 |
| chr3 | 31921241 | 31921288 | 48     | 1 | 5 | 3 | 0.1218695  | 0.04407651 | 1 | 8 | 0.1218695  | 0.58747015 |
| chr3 | 31921288 | 31966445 | 45158  | 1 | 1 | 4 | 0.1218695  | 0.02074938 | 1 | 8 | 0.1218695  | 0.79906872 |
| chr3 | 31966445 | 32000976 | 34532  | 2 | 1 | 4 | 0.1218695  | 0.01077081 | 1 | 9 | 0.1218695  | 1.01542894 |
| chr3 | 32000976 | 32256459 | 255484 | 5 | 1 | 3 | 0.1218695  | 0.0079614  | 1 | 8 | 0.1218695  | 1.07548421 |
| chr3 | 32256459 | 32343447 | 86989  | 2 | 1 | 3 | 0.1218695  | 0.01598258 | 1 | 7 | 0.1218695  | 0.84395715 |
| chr3 | 32343447 | 32398947 | 55501  | 1 | 3 | 3 | 0.1218695  | 0.0079614  | 1 | 8 | 0.1218695  | 1.07548421 |
| chr3 | 32398947 | 32399005 | 59     | 1 | 1 | 3 | 0.1218695  | 0.00378107 | 1 | 9 | 0.1218695  | 1.33111237 |
| chr3 | 32399005 | 32509666 | 110962 | 3 | 1 | 4 | 0.1218695  | 0.01598258 | 1 | 7 | 0.1218695  | 0.84395715 |
| chr3 | 32509666 | 32541873 | 31510  | 2 | 1 | 3 | 0.1218695  | 0.03074938 | 1 | 8 | 0.1218695  | 0.79906872 |
| chr3 | 32541873 | 32544431 | 2557   | 1 | 1 | 4 | 0.1218695  | 0.03812622 | 1 | 7 | 0.1218695  | 0.60763643 |
| chr3 | 32544431 | 32544483 | 53     | 1 | 1 | 4 | 0.1218695  | 0.01077081 | 1 | 9 | 0.1218695  | 1.01542894 |
| chr3 | 32544483 | 32576054 | 31572  | 1 | 1 | 4 | 0.1218695  | 0.02074938 | 1 | 8 | 0.1218695  | 0.79906872 |
| chr3 | 32576054 | 32653663 | 77610  | 1 | 1 | 3 | 0.1218695  | 0.0079614  | 1 | 8 | 0.1218695  | 1.07548421 |
| chr3 | 32653663 | 32653722 | 60     | 1 | 1 | 3 | 0.1218695  | 0.00378107 | 1 | 9 | 0.1218695  | 1.33111237 |
| chr3 | 32653722 | 32785668 | 131947 | 1 | 1 | 3 | 0.1218695  | 0.01598258 | 1 | 7 | 0.1218695  | 0.84395715 |
| chr3 | 32785668 | 32892815 | 107148 | 3 | 1 | 3 | 0.05404976 | 0.01598258 | 2 | 7 | 0.30102999 | 0.84395715 |
| chr3 | 32892815 | 32995580 | 102766 | 2 | 1 | 3 | 0.1218695  | 0.01598258 | 1 | 7 | 0.1218695  | 0.84395715 |
| chr3 | 32995580 | 32995633 | 54     | 1 | 1 | 3 | 0.05404976 | 0.01598258 | 2 | 7 | 0.30102999 | 0.84395715 |
| chr3 | 32995633 | 33133877 | 138245 | 3 | 1 | 3 | 0.1218695  | 0.01598258 | 1 | 7 | 0.1218695  | 0.84395715 |
| chr3 | 33133877 | 33171478 | 37602  | 2 | 2 | 3 | 0.1575501  | 0.01598258 | 2 | 7 | 0.1575501  | 0.84395715 |
| chr3 | 33171478 | 33229045 | 57568  | 1 | 1 | 2 | 0.05404976 | 0.01053319 | 2 | 6 | 0.30102999 | 0.91219088 |
| chr3 | 33229045 | 33382941 | 153897 | 4 | 1 | 2 | 0.05404976 | 0.02162467 | 2 | 5 | 0.30102999 | 0.68214471 |
| chr3 | 33382941 | 33383000 | 60     | 1 | 1 | 2 | 0.05404976 | 0.00493743 | 1 | 7 | 0.30102999 | 1.16581773 |
| chr3 | 33383000 | 33467282 | 84283  | 3 | 1 | 2 | 0.1218695  | 0.01053319 | 1 | 6 | 0.1218695  | 0.91219088 |
| chr3 | 33467282 | 33544145 | 76864  | 1 | 1 | 2 | 0.1218695  | 0.0429175  | 1 | 4 | 0.1218695  | 0.47744371 |
| chr3 | 33544145 | 33597849 | 53705  | 1 | 1 | 1 | 0.1218695  | 0.02438986 | 1 | 3 | 0.1218695  | 0.51676182 |
| chr3 | 33597849 | 33639827 | 41979  | 2 | 1 | 1 | 0.05404976 | 0.01091641 | 2 | 4 | 0.30102999 | 0.76005302 |
| chr3 | 33639827 | 33639886 | 60     | 1 | 1 | 2 | 0.05404976 | 0.0429175  | 2 | 4 | 0.30102999 | 0.47744371 |
| chr3 | 33639886 | 33855094 | 215209 | 4 | 1 | 1 | 0.05404976 | 0.01091641 | 2 | 4 | 0.30102999 | 0.76005302 |
| chr3 | 33855094 | 33909834 | 54741  | 2 | 1 | 1 | 0.05404976 | 0.02438986 | 2 | 3 | 0.30102999 | 0.51676182 |
| chr3 | 33909834 | 34087138 | 177305 | 1 | 1 | 0 | 0.05404976 | 0          | 2 | 3 | 0.30102999 | 0.93173516 |
| chr3 | 34087138 | 34316258 | 229121 | 1 | 1 | 0 | 0.1218695  | 0          | 1 | 3 | 0.1218695  | 0.93173516 |
| chr3 | 34316258 | 34316317 | 60     | 1 | 1 | 0 | 0.1218695  | 0          | 1 | 5 | 0.1218695  | 1.60515106 |
| chr3 | 34316317 | 34444559 | 128243 | 1 | 1 | 0 | 0.1218695  | 0          | 1 | 4 | 0.1218695  | 1.26272838 |
| chr3 | 34444559 | 34635274 | 19     |   |   |   |            |            |   |   |            |            |

|      |          |          |        |    |   |   |            |            |    |            |            |            |
|------|----------|----------|--------|----|---|---|------------|------------|----|------------|------------|------------|
| chr3 | 38522873 | 38615248 | 92376  | 2  | 1 | 3 | 0.05404976 | 0.00170589 | 2  | 10         | 0.30102999 | 1.61091002 |
| chr3 | 38615248 | 38698412 | 83165  | 2  | 1 | 3 | 0.05404976 | 0.00378107 | 2  | 9          | 0.30102999 | 1.33111237 |
| chr3 | 38698412 | 38830481 | 132070 | 3  | 1 | 2 | 0.05404976 | 9.54E-04   | 2  | 9          | 0.30102999 | 1.74076927 |
| chr3 | 38830481 | 38830540 | 60     | 1  | 1 | 3 | 0.05404976 | 0.00378107 | 2  | 9          | 0.30102999 | 1.33111237 |
| chr3 | 38830540 | 38891858 | 61319  | 1  | 1 | 2 | 0.05404976 | 9.54E-04   | 2  | 9          | 0.30102999 | 1.74076927 |
| chr3 | 38891858 | 38938342 | 46485  | 2  | 1 | 2 | 0.05404976 | 3.90E-04   | 2  | 10         | 0.30102999 | 2.0620585  |
| chr3 | 38938342 | 38938401 | 60     | 1  | 1 | 3 | 0.05404976 | 0.00170589 | 2  | 10         | 0.30102999 | 1.61091002 |
| chr3 | 38938401 | 38995553 | 57153  | 1  | 1 | 2 | 0.05404976 | 3.90E-04   | 2  | 10         | 0.30102999 | 2.0620585  |
| chr3 | 38995553 | 39115065 | 119513 | 2  | 1 | 1 | 0.05404976 | 4.80E-05   | 2  | 10         | 0.30102999 | 2.6588298  |
| chr3 | 39115065 | 39374803 | 259739 | 8  | 1 | 2 | 0.05404976 | 3.90E-04   | 2  | 10         | 0.30102999 | 2.0620585  |
| chr3 | 39374803 | 39532603 | 157801 | 3  | 1 | 1 | 0.05404976 | 0.00204627 | 2  | 6          | 0.30102999 | 1.31360226 |
| chr3 | 39532603 | 39532662 | 60     | 1  | 1 | 2 | 0.05404976 | 0.01053319 | 2  | 6          | 0.30102999 | 0.91219088 |
| chr3 | 39532662 | 39681962 | 149301 | 2  | 1 | 1 | 0.05404976 | 0.00204627 | 2  | 6          | 0.30102999 | 1.31360226 |
| chr3 | 39681962 | 39682021 | 60     | 1  | 1 | 1 | 0.05404976 | 8.47E-04   | 2  | 7          | 0.30102999 | 1.62048027 |
| chr3 | 39682021 | 39873559 | 191539 | 2  | 1 | 1 | 0.1218695  | 0.00204627 | 1  | 6          | 0.1218695  | 1.31360226 |
| chr3 | 39873559 | 40162426 | 288868 | 6  | 1 | 0 | 0.1218695  | 0          | 1  | 4          | 0.1218695  | 1.26272838 |
| chr3 | 40162426 | 40255918 | 93493  | 2  | 1 | 0 | 0.1218695  | 0          | 1  | 3          | 0.1218695  | 0.93173516 |
| chr3 | 40255918 | 40255977 | 60     | 1  | 2 | 0 | 0.30102999 | 0          | 1  | 3          | 0.05404976 | 0.93173516 |
| chr3 | 40255977 | 40352356 | 96380  | 2  | 1 | 0 | 0.1218695  | 0          | 1  | 3          | 0.1218695  | 0.93173516 |
| chr3 | 40352356 | 40352412 | 57     | 1  | 1 | 0 | 0.1218695  | 0          | 1  | 4          | 0.1218695  | 1.26272838 |
| chr3 | 40352412 | 40529789 | 177378 | 4  | 1 | 0 | 0.1218695  | 0          | 1  | 3          | 0.1218695  | 0.93173516 |
| chr3 | 40529789 | 40570473 | 40685  | 3  | 1 | 0 | 0.1218695  | 0          | 1  | 4          | 0.1218695  | 1.26272838 |
| chr3 | 40570473 | 40630279 | 59807  | 2  | 1 | 0 | 0.1218695  | 0          | 1  | 5          | 0.1218695  | 1.60515106 |
| chr3 | 40630279 | 40759986 | 129708 | 2  | 1 | 1 | 0.1218695  | 0.00478973 | 1  | 5          | 0.1218695  | 1.02643191 |
| chr3 | 40759986 | 41177103 | 417118 | 3  | 1 | 2 | 0.05404976 | 0.00493743 | 2  | 7          | 0.30102999 | 1.16581773 |
| chr3 | 41177103 | 41177162 | 60     | 1  | 1 | 3 | 0.05404976 | 0.01598258 | 2  | 7          | 0.30102999 | 0.84395715 |
| chr3 | 41177162 | 41457495 | 280334 | 6  | 1 | 1 | 0.1218695  | 0.00204627 | 1  | 6          | 0.1218695  | 1.31360226 |
| chr3 | 41457495 | 41457554 | 60     | 1  | 1 | 3 | 0.1218695  | 0.01598258 | 1  | 7          | 0.1218695  | 0.84395715 |
| chr3 | 41457554 | 41570251 | 112698 | 2  | 1 | 2 | 0.1218695  | 0.01053319 | 1  | 6          | 0.1218695  | 0.91219088 |
| chr3 | 41570251 | 41614450 | 44200  | 1  | 1 | 1 | 0.1218695  | 0.00204627 | 1  | 6          | 0.1218695  | 1.31360226 |
| chr3 | 41614450 | 41667185 | 52736  | 2  | 1 | 2 | 0.1218695  | 0.01053319 | 1  | 6          | 0.1218695  | 0.91219088 |
| chr3 | 41667185 | 41715768 | 48584  | 2  | 1 | 1 | 0.1218695  | 0.03070643 | 1  | 6          | 0.1218695  | 0.63695542 |
| chr3 | 41715768 | 41831015 | 115248 | 2  | 1 | 2 | 0.1218695  | 0.01053319 | 1  | 6          | 0.1218695  | 0.91219088 |
| chr3 | 41831015 | 41831074 | 60     | 1  | 1 | 3 | 0.1218695  | 0.00796414 | 8  | 8          | 0.1218695  | 1.07548421 |
| chr3 | 41831074 | 41927881 | 96808  | 2  | 1 | 2 | 0.1218695  | 0.01053319 | 1  | 6          | 0.1218695  | 0.91219088 |
| chr3 | 41927881 | 41965241 | 37361  | 2  | 1 | 1 | 0.1218695  | 0.00493743 | 1  | 7          | 0.1218695  | 1.16581773 |
| chr3 | 41965241 | 41996795 | 31555  | 2  | 1 | 4 | 0.1218695  | 0.02074938 | 1  | 8          | 0.1218695  | 0.79906872 |
| chr3 | 41996795 | 41996854 | 60     | 1  | 1 | 4 | 0.05404976 | 0.00247414 | 2  | 11         | 0.30102999 | 1.52371709 |
| chr3 | 41996854 | 42167061 | 170208 | 3  | 1 | 4 | 0.05404976 | 0.01077081 | 9  | 9          | 0.30102999 | 1.01542894 |
| chr3 | 42167061 | 42167119 | 59     | 1  | 1 | 5 | 0.05404976 | 0.00317045 | 12 | 0.30102999 | 1.46403142 |            |
| chr3 | 42167119 | 42226820 | 59702  | 1  | 1 | 5 | 0.05404976 | 0.00666883 | 11 | 0.30102999 | 1.20557689 |            |
| chr3 | 42226820 | 42305446 | 78627  | 1  | 1 | 5 | 0.05404976 | 0.02473314 | 2  | 9          | 0.30102999 | 0.76806864 |
| chr3 | 42305446 | 42390341 | 84896  | 1  | 1 | 4 | 0.05404976 | 0.01077081 | 9  | 9          | 0.30102999 | 1.01542894 |
| chr3 | 42390341 | 42452015 | 61675  | 3  | 1 | 4 | 0.05404976 | 0.00530919 | 2  | 10         | 0.30102999 | 1.25681219 |
| chr3 | 42452015 | 42452072 | 58     | 1  | 1 | 5 | 0.05404976 | 0.00666883 | 2  | 11         | 0.30102999 | 1.20557689 |
| chr3 | 42452072 | 42533372 | 81301  | 2  | 1 | 4 | 0.05404976 | 0.00530919 | 2  | 10         | 0.30102999 | 1.25681219 |
| chr3 | 42533372 | 42635823 | 102452 | 3  | 1 | 5 | 0.05404976 | 0.01320236 | 2  | 10         | 0.30102999 | 0.97390707 |
| chr3 | 42635823 | 42750902 | 115080 | 4  | 1 | 5 | 0.05404976 | 0.00666883 | 2  | 11         | 0.30102999 | 1.20557689 |
| chr3 | 42750902 | 42750961 | 60     | 1  | 1 | 6 | 0.05404976 | 0.01518174 | 2  | 11         | 0.30102999 | 0.9449689  |
| chr3 | 42750961 | 43129680 | 378720 | 13 | 1 | 5 | 0.05404976 | 0.00666883 | 2  | 11         | 0.30102999 | 1.20557689 |
| chr3 | 43129680 | 43249503 | 119824 | 2  | 1 | 3 | 0.1218695  | 0.00170589 | 1  | 10         | 0.1218695  | 1.61091002 |
| chr3 | 43249503 | 43249562 | 60     | 1  | 1 | 3 | 0.1218695  | 7.28E-04   | 1  | 11         | 0.1218695  | 1.91540774 |
| chr3 | 43249562 | 43304446 | 80885  | 1  | 1 | 3 | 0.1218695  | 0.00170589 | 1  | 10         | 0.1218695  | 1.61091002 |
| chr3 | 43304446 | 43403101 | 72656  | 5  | 1 | 3 | 0.05404976 | 0.00170589 | 2  | 10         | 0.30102999 | 1.61091002 |
| chr3 | 43403101 | 43448201 | 45101  | 2  | 1 | 3 | 0.05404976 | 7.28E-04   | 1  | 11         | 0.30102999 | 1.91540774 |
| chr3 | 43448201 | 43474154 | 25954  | 2  | 1 | 3 | 0.05404976 | 2.93E-04   | 2  | 12         | 0.30102999 | 2.24559516 |
| chr3 | 43474154 | 43474210 | 57     | 1  | 1 | 4 | 0.05404976 | 0.00108487 | 12 | 12         | 0.30102999 | 1.81706455 |
| chr3 | 43474210 | 43552272 | 78063  | 2  | 1 | 4 | 0.05404976 | 0.00247414 | 11 | 0.30102999 | 1.52371709 |            |
| chr3 | 43552272 | 43743683 | 191412 | 5  | 1 | 4 | 0.05404976 | 0.00108487 | 12 | 12         | 0.30102999 | 1.81706455 |
| chr3 | 43743683 | 43743742 | 60     | 1  | 1 | 6 | 0.05404976 | 0.00778066 | 12 | 0.30102999 | 1.17038931 |            |
| chr3 | 43743742 | 43865299 | 121558 | 2  | 1 | 5 | 0.05404976 | 0.00666883 | 2  | 11         | 0.30102999 | 1.20557689 |
| chr3 | 43865299 | 43865358 | 60     | 1  | 1 | 7 | 0.05404976 | 0.01667721 | 12 | 0.30102999 | 0.92532268 |            |
| chr3 | 43865358 | 44362626 | 497269 | 5  | 1 | 7 | 0.05404976 | 0.01518174 | 2  | 11         | 0.30102999 | 0.9449689  |
| chr3 | 44362626 | 44460112 | 63387  | 1  | 1 | 6 | 0.05404976 | 0.03037338 | 11 | 0.30102999 | 0.73110763 |            |
| chr3 | 44460112 | 44681785 | 235774 | 7  | 1 | 6 | 0.05404976 | 0.02391376 | 10 | 0.30102999 | 0.74627054 |            |
| chr3 | 44681785 | 44681844 | 60     | 1  | 1 | 6 | 0.05404976 | 0.01518174 | 2  | 11         | 0.30102999 | 0.9449689  |
| chr3 | 44681844 | 44694207 | 12364  | 1  | 1 | 5 | 0.05404976 | 0.00666883 | 2  | 11         | 0.30102999 | 1.20557689 |
| chr3 | 44694207 | 44777967 | 83761  | 3  | 1 | 5 | 0.05404976 | 0.02473314 | 2  | 9          | 0.30102999 | 0.76806864 |
| chr3 | 44777967 | 44904900 | 126934 | 6  | 1 | 5 | 0.05404976 | 0.01320236 | 2  | 10         | 0.30102999 | 0.97390707 |
| chr3 | 44904900 | 44938171 | 33272  | 3  | 1 | 6 | 0.05404976 | 0.02793176 | 10 | 0.30102999 | 0.74627054 |            |
| chr3 | 44938171 | 45044866 | 106696 | 4  | 1 | 7 | 0.05404976 | 0.05232577 | 2  | 10         | 0.30102999 | 0.56314362 |
| chr3 | 45044866 | 45052868 | 8003   | 2  | 1 | 8 | 0.05404976 | 0.08923391 | 10 | 0.30102999 | 0.4167287  |            |
| chr3 | 45052868 | 45102264 | 49397  | 2  | 1 | 6 | 0.05404976 | 0.02793176 | 2  | 10         | 0.30102999 | 0.74627054 |
| chr3 | 45102264 | 45139372 | 37109  | 2  | 1 | 7 | 0.05404976 | 0.05232577 | 2  | 10         | 0.30102999 | 0.56314362 |
| chr3 | 45139372 | 45519877 | 402616 | 8  | 1 | 6 | 0.05404976 | 0.02793176 | 2  | 10         | 0.30102999 | 0.74627054 |
| chr3 | 45519877 | 45542040 | 54     | 1  | 1 | 6 | 0.05404976 | 0.01518174 | 2  | 11         | 0.30102999 | 0.9449689  |
| chr3 | 45542040 | 45661623 | 119584 | 2  | 1 | 6 | 0.05404976 | 0.02793176 | 2  | 10         | 0.30102999 | 0.74627054 |
| chr3 | 45661623 | 45688578 | 26956  | 2  | 1 | 7 | 0.05404976 | 0.05232577 | 2  | 10         | 0.30102999 | 0.56314362 |
| chr3 | 45688578 | 45688637 | 60     | 1  | 1 | 8 | 0.05404976 | 0.05490675 | 2  | 11         | 0.30102999 | 0.55623409 |
| chr3 | 4568637  | 45773620 | 84984  | 2  | 1 | 7 | 0.05404976 | 0.03037338 | 11 | 0.30102999 | 0.73110763 |            |
| chr3 | 45773620 | 45799276 | 25657  | 1  | 1 | 6 | 0.05404976 | 0.01518174 | 2  | 11         | 0.30102999 | 0.9449689  |
| chr3 | 45799276 | 45867117 | 67842  | 2  | 1 | 6 | 0.05404976 | 0.02793176 | 10 | 0.30102999 | 0.74627054 |            |
| chr3 | 45867117 | 45879470 | 12354  | 2  | 1 | 6 | 0.05404976 | 0.01518174 | 2  | 11         | 0.30102999 | 0.9449689  |
| chr3 | 45879470 | 45879529 | 60     | 1  | 1 | 8 | 0.05404976 | 0.03209037 | 12 | 0.30102999 | 0.72109894 |            |
| chr3 | 45879529 | 45932245 | 52717  | 2  | 1 | 1 | 0.05404976 | 0.03037338 | 11 | 0.30102999 | 0.73110763 |            |
| chr3 | 45932245 | 45932304 | 60     | 1  | 1 | 8 | 0.05404976 | 0.05490675 | 2  | 11         | 0.30102999 | 0.55623409 |
| chr3 | 45932304 | 45986647 | 54344  | 2  | 1 | 7 | 0.05404976 | 0.03037338 | 11 | 0.30102999 | 0.73110763 |            |
| chr3 | 45986647 | 45989683 | 3037   | 2  | 1 | 8 | 0.05404976 | 0.03209037 | 12 | 0.30102999 | 0.72109894 |            |
| chr3 | 45989683 | 46033995 | 44313  | 1  | 1 | 8 | 0.05404976 | 0.05490675 | 2  | 11         | 0.30102999 | 0.55623409 |
| chr3 | 46033995 | 46062944 | 28950  | 1  | 1 | 7 | 0.05404976 | 0.05232577 | 2  | 10         | 0.30102999 | 0.56314362 |
| chr3 | 46062944 | 46186921 | 123978 | 1  | 1 | 7 | 0.1218695  | 0.05232577 | 1  | 10         | 0.1218695  | 0.56314362 |
| chr3 | 4        |          |        |    |   |   |            |            |    |            |            |            |

|      |          |          |        |   |   |    |            |            |   |    |            |            |
|------|----------|----------|--------|---|---|----|------------|------------|---|----|------------|------------|
| chr3 | 47963287 | 48002013 | 38727  | 1 | 0 | 11 | 0          | 0.0574087  | 1 | 14 | 0.30102999 | 0.5498098  |
| chr3 | 48002013 | 48094781 | 92769  | 2 | 0 | 10 | 0          | 0.03344703 | 1 | 14 | 0.30102999 | 0.71353304 |
| chr3 | 48094781 | 48128176 | 33396  | 2 | 1 | 10 | 0          | 0.00909834 | 1 | 16 | 0.30102999 | 1.13428373 |
| chr3 | 48128176 | 48160737 | 32562  | 2 | 0 | 11 | 0          | 0.01767679 | 1 | 16 | 0.30102999 | 0.91308053 |
| chr3 | 48160737 | 48200083 | 39347  | 1 | 0 | 10 | 0          | 0.01817691 | 1 | 15 | 0.30102999 | 0.90719478 |
| chr3 | 48200083 | 48219728 | 19646  | 1 | 0 | 9  | 0          | 0.00926608 | 1 | 15 | 0.30102999 | 1.13004284 |
| chr3 | 48219728 | 48228287 | 8560   | 2 | 1 | 9  | 0.1218695  | 0.00926608 | 1 | 15 | 0.1218695  | 1.13004284 |
| chr3 | 48228287 | 48265559 | 37273  | 1 | 1 | 9  | 0.1218695  | 0.01817691 | 1 | 14 | 0.1218695  | 0.90719478 |
| chr3 | 48265559 | 48335484 | 69926  | 3 | 1 | 9  | 0.1218695  | 0.01767679 | 1 | 13 | 0.1218695  | 0.91308053 |
| chr3 | 48335484 | 48371553 | 36070  | 3 | 1 | 8  | 0.1218695  | 0.00909834 | 1 | 14 | 0.1218695  | 1.13428373 |
| chr3 | 48371553 | 48421714 | 50162  | 1 | 1 | 8  | 0.1218695  | 0.03209037 | 1 | 12 | 0.1218695  | 0.72109894 |
| chr3 | 48421714 | 48421773 | 60     | 1 | 1 | 8  | 0.1218695  | 0.01767679 | 1 | 13 | 0.1218695  | 0.91308053 |
| chr3 | 48421773 | 48600890 | 179118 | 7 | 1 | 8  | 0.1218695  | 0.03209037 | 1 | 12 | 0.1218695  | 0.72109894 |
| chr3 | 48600890 | 48603090 | 2201   | 2 | 1 | 8  | 0.1218695  | 0.01767679 | 1 | 13 | 0.1218695  | 0.91308053 |
| chr3 | 48603090 | 48630602 | 27513  | 1 | 1 | 8  | 0.1218695  | 0.03209037 | 1 | 12 | 0.1218695  | 0.72109894 |
| chr3 | 48630602 | 48630648 | 47     | 1 | 1 | 8  | 0.1218695  | 0.01767679 | 1 | 13 | 0.1218695  | 0.91308053 |
| chr3 | 48630648 | 48674554 | 43907  | 4 | 0 | 8  | 0          | 0.01767679 | 1 | 13 | 0.30102999 | 0.91308053 |
| chr3 | 48674554 | 48717333 | 42780  | 3 | 1 | 8  | 0.1218695  | 0.00909834 | 1 | 14 | 0.1218695  | 1.13428373 |
| chr3 | 48717333 | 48725407 | 8075   | 2 | 1 | 8  | 0.1218695  | 0.01767679 | 1 | 13 | 0.1218695  | 0.91308053 |
| chr3 | 48725407 | 48730993 | 5387   | 4 | 1 | 8  | 0.1218695  | 0.00909834 | 1 | 14 | 0.1218695  | 1.13428373 |
| chr3 | 48730993 | 48801444 | 129152 | 3 | 1 | 8  | 0.1218695  | 0.01767679 | 1 | 13 | 0.1218695  | 0.91308053 |
| chr3 | 48801444 | 48900155 | 40012  | 1 | 1 | 8  | 0.1218695  | 0.03209037 | 1 | 12 | 0.1218695  | 0.72109894 |
| chr3 | 48900155 | 48933052 | 32898  | 2 | 1 | 8  | 0.1218695  | 0.01767679 | 1 | 13 | 0.1218695  | 0.91308053 |
| chr3 | 48933052 | 48933111 | 60     | 1 | 1 | 8  | 0.1218695  | 0.00909834 | 1 | 14 | 0.1218695  | 1.13428373 |
| chr3 | 48933111 | 48974688 | 41578  | 1 | 1 | 7  | 0.1218695  | 0.00413023 | 1 | 14 | 0.1218695  | 1.39918918 |
| chr3 | 48974688 | 48974747 | 60     | 1 | 1 | 8  | 0.1218695  | 0.00909834 | 1 | 14 | 0.1218695  | 1.13428373 |
| chr3 | 48974747 | 49011215 | 36469  | 1 | 1 | 7  | 0.1218695  | 0.00859896 | 1 | 13 | 0.1218695  | 1.14735594 |
| chr3 | 49011215 | 49047095 | 35881  | 3 | 1 | 7  | 0.1218695  | 0.00183109 | 1 | 15 | 0.1218695  | 1.68336308 |
| chr3 | 49047095 | 49092591 | 45497  | 5 | 1 | 7  | 0.1218695  | 7.41E-04   | 1 | 16 | 0.1218695  | 2.00316618 |
| chr3 | 49092591 | 49092650 | 60     | 1 | 1 | 7  | 0.1218695  | 0.00188722 | 1 | 16 | 0.1218695  | 1.67551277 |
| chr3 | 49092650 | 49169538 | 76889  | 4 | 1 | 7  | 0.1218695  | 7.41E-04   | 1 | 16 | 0.1218695  | 2.00316618 |
| chr3 | 49169538 | 49169587 | 50     | 1 | 1 | 8  | 0.1218695  | 0.00188722 | 1 | 16 | 0.1218695  | 1.67551277 |
| chr3 | 49169587 | 49199320 | 29734  | 1 | 1 | 7  | 0.1218695  | 7.41E-04   | 1 | 16 | 0.1218695  | 2.00316618 |
| chr3 | 49199320 | 49199373 | 54     | 1 | 1 | 8  | 0.1218695  | 0.00188722 | 1 | 16 | 0.1218695  | 1.67551277 |
| chr3 | 49199373 | 49249270 | 49898  | 3 | 1 | 7  | 0.1218695  | 7.41E-04   | 1 | 16 | 0.1218695  | 2.00316618 |
| chr3 | 49249270 | 49274002 | 24733  | 1 | 1 | 7  | 0.1218695  | 0.00183109 | 1 | 15 | 0.1218695  | 1.68336308 |
| chr3 | 49274002 | 49315808 | 41807  | 2 | 2 | 7  | 0.30102999 | 0.00183109 | 1 | 15 | 0.05404976 | 1.68336308 |
| chr3 | 49315808 | 49395230 | 79423  | 5 | 2 | 7  | 0.30102999 | 7.41E-04   | 1 | 16 | 0.05404976 | 2.00316618 |
| chr3 | 49395230 | 49421743 | 26514  | 4 | 2 | 9  | 0.30102999 | 0.00183109 | 1 | 17 | 0.05404976 | 1.68336308 |
| chr3 | 49421743 | 49457011 | 35269  | 2 | 2 | 8  | 0.30102999 | 7.41E-04   | 1 | 17 | 0.05404976 | 2.00316618 |
| chr3 | 49457011 | 49462789 | 5779   | 2 | 2 | 9  | 0.30102999 | 0.00183109 | 1 | 17 | 0.05404976 | 1.68336308 |
| chr3 | 49462789 | 49513093 | 50305  | 2 | 2 | 8  | 0.30102999 | 7.41E-04   | 1 | 17 | 0.05404976 | 2.00316618 |
| chr3 | 49513093 | 49637222 | 124130 | 3 | 1 | 8  | 0.1218695  | 7.41E-04   | 1 | 17 | 0.1218695  | 2.00316618 |
| chr3 | 49637222 | 49673422 | 36201  | 2 | 1 | 9  | 0.1218695  | 6.86E-04   | 1 | 18 | 0.1218695  | 2.02387299 |
| chr3 | 49673422 | 49673481 | 60     | 1 | 1 | 11 | 0.1218695  | 0.00373523 | 1 | 18 | 0.1218695  | 1.42397267 |
| chr3 | 49673481 | 49720947 | 47467  | 1 | 1 | 10 | 0.1218695  | 0.00166733 | 1 | 18 | 0.1218695  | 1.70763027 |
| chr3 | 49720947 | 49811521 | 90575  | 5 | 0 | 9  | 0          | 6.86E-04   | 1 | 18 | 0.30102999 | 2.02387299 |
| chr3 | 49811521 | 49898264 | 86744  | 4 | 0 | 9  | 0          | 0.00183109 | 1 | 17 | 0.30102999 | 1.68336308 |
| chr3 | 49898264 | 49924607 | 26344  | 2 | 0 | 8  | 0          | 7.41E-04   | 1 | 17 | 0.30102999 | 2.00316618 |
| chr3 | 49924607 | 49932774 | 8168   | 3 | 0 | 9  | 0          | 0.00183109 | 1 | 17 | 0.30102999 | 1.68336308 |
| chr3 | 49932774 | 49977269 | 44496  | 3 | 0 | 8  | 0          | 7.41E-04   | 1 | 17 | 0.30102999 | 2.00316618 |
| chr3 | 49977269 | 50005791 | 28523  | 2 | 0 | 9  | 0          | 0.00183109 | 1 | 17 | 0.30102999 | 1.68336308 |
| chr3 | 50005791 | 50085653 | 79863  | 2 | 0 | 8  | 0          | 7.41E-04   | 1 | 17 | 0.30102999 | 2.00316618 |
| chr3 | 50085653 | 50085707 | 55     | 1 | 0 | 10 | 0          | 0.00413023 | 1 | 17 | 0.30102999 | 1.39918918 |
| chr3 | 50085707 | 50311912 | 226206 | 7 | 0 | 8  | 0          | 0.00188722 | 1 | 16 | 0.30102999 | 1.67551277 |
| chr3 | 50311912 | 50323584 | 11673  | 2 | 0 | 9  | 0          | 0.00433294 | 1 | 16 | 0.30102999 | 1.3873209  |
| chr3 | 50323584 | 50339735 | 16152  | 2 | 0 | 10 | 0          | 0.00909834 | 1 | 16 | 0.30102999 | 1.13428373 |
| chr3 | 50339735 | 50342224 | 2490   | 3 | 0 | 10 | 0          | 0.00413023 | 1 | 17 | 0.30102999 | 1.39918918 |
| chr3 | 50342224 | 50367646 | 25423  | 4 | 0 | 9  | 0          | 0.00183109 | 1 | 17 | 0.30102999 | 1.68336308 |
| chr3 | 50367646 | 50390376 | 22731  | 3 | 0 | 8  | 0          | 0.00433294 | 1 | 15 | 0.30102999 | 1.3873209  |
| chr3 | 50390376 | 50408802 | 18427  | 3 | 0 | 8  | 0          | 0.00188722 | 1 | 16 | 0.30102999 | 1.67551277 |
| chr3 | 50408802 | 50440246 | 31445  | 2 | 0 | 10 | 0          | 0.00413023 | 1 | 17 | 0.30102999 | 1.39918918 |
| chr3 | 50440246 | 50440305 | 60     | 1 | 0 | 12 | 0          | 0.01667721 | 1 | 17 | 0.30102999 | 0.92522668 |
| chr3 | 50440305 | 50539207 | 98903  | 2 | 0 | 11 | 0          | 0.00859896 | 1 | 17 | 0.30102999 | 1.14735594 |
| chr3 | 50539207 | 50607823 | 68619  | 3 | 0 | 11 | 0          | 0.00373523 | 1 | 18 | 0.30102999 | 1.42397267 |
| chr3 | 50607823 | 50665961 | 58137  | 3 | 0 | 11 | 0          | 0.00859896 | 1 | 17 | 0.30102999 | 1.14735594 |
| chr3 | 50665961 | 50666000 | 60     | 1 | 0 | 11 | 0          | 0.00373523 | 1 | 18 | 0.30102999 | 1.42397267 |
| chr3 | 50666000 | 50679116 | 13097  | 1 | 0 | 11 | 0          | 0.00859896 | 1 | 17 | 0.30102999 | 1.14735594 |
| chr3 | 50679116 | 50713799 | 34684  | 2 | 0 | 11 | 0          | 0.00373523 | 1 | 18 | 0.30102999 | 1.42397267 |
| chr3 | 50713799 | 50787294 | 73496  | 2 | 0 | 11 | 0          | 0.00859896 | 1 | 17 | 0.30102999 | 1.14735594 |
| chr3 | 50787294 | 50824511 | 37218  | 2 | 0 | 11 | 0          | 0.00373523 | 1 | 18 | 0.30102999 | 1.42397267 |
| chr3 | 50824511 | 50824570 | 60     | 1 | 0 | 11 | 0          | 0.00414024 | 1 | 19 | 0.30102999 | 1.7506523  |
| chr3 | 50824570 | 50913458 | 88889  | 2 | 0 | 11 | 0          | 0.00859896 | 1 | 17 | 0.30102999 | 1.14735594 |
| chr3 | 50913458 | 51183809 | 270352 | 5 | 0 | 11 | 0          | 0.01767679 | 1 | 16 | 0.30102999 | 0.91308053 |
| chr3 | 51183809 | 51378155 | 194347 | 4 | 0 | 11 | 0          | 0.01767679 | 1 | 16 | 0          | 0.91308053 |
| chr3 | 51378155 | 51378214 | 60     | 1 | 0 | 13 | 0          | 0.03037338 | 1 | 17 | 0          | 0.73110763 |
| chr3 | 51378214 | 51413402 | 35189  | 1 | 0 | 11 | 0          | 0.00859896 | 1 | 17 | 0          | 1.14735594 |
| chr3 | 51413402 | 51436181 | 22780  | 5 | 0 | 11 | 0          | 0.00373523 | 1 | 18 | 0          | 1.42397267 |
| chr3 | 51436181 | 51486485 | 50305  | 2 | 0 | 11 | 0          | 0.01767679 | 1 | 16 | 0          | 0.91308053 |
| chr3 | 51486485 | 51486544 | 60     | 1 | 0 | 11 | 0          | 0.00373523 | 1 | 18 | 0          | 1.42397267 |
| chr3 | 51486544 | 51520629 | 34086  | 1 | 0 | 11 | 0          | 0.00859896 | 1 | 17 | 0          | 1.14735594 |
| chr3 | 51520629 | 51613907 | 93279  | 3 | 0 | 11 | 0          | 0.01767679 | 1 | 16 | 0          | 0.91308053 |
| chr3 | 51613907 | 51613966 | 60     | 1 | 0 | 11 | 0          | 0.00859896 | 1 | 17 | 0          | 1.14735594 |
| chr3 | 51613966 | 51662236 | 48271  | 1 | 0 | 11 | 0          | 0.01767679 | 1 | 16 | 0          | 0.91308053 |
| chr3 | 51662236 | 51672205 | 9970   | 1 | 0 | 11 | 0          | 0.0574087  | 1 | 14 | 0          | 0.5498098  |
| chr3 | 51672205 | 51672253 | 49     | 1 | 0 | 12 | 0          | 0.09290028 | 1 | 14 | 0          | 0.41314172 |
| chr3 | 51672253 | 51721479 | 49227  | 1 | 0 | 11 | 0          | 0.09334429 | 1 | 13 | 0          | 0.41271556 |
| chr3 | 51721479 | 51743590 | 22112  | 2 | 0 | 11 | 0          | 0.0574087  | 1 | 14 | 0          | 0.5498098  |
| chr3 | 51743590 | 51743641 | 52     | 1 | 0 | 12 | 0          | 0.0565833  | 1 | 15 | 0          | 0.55190077 |
| chr3 | 51743641 | 51896472 | 152832 | 2 | 0 | 11 | 0          | 0.0574087  | 1 | 14 | 0          | 0.5498098  |
| chr3 | 51896472 | 51929623 | 33152  | 2 | 0 | 12 | 0          | 0.09290028 | 1 | 14 | 0          | 0.41314172 |
| chr3 | 51929623 | 51929673 | 51     | 1 | 0 | 12 | 0          | 0.03209037 | 1 | 16 | 0          | 0.72109894 |
| chr3 | 51929673 | 51973337 | 43665  | 2 | 0 | 11 | 0          | 0.0331093  | 1 | 15 | 0          | 0.71538971 |
| chr3 | 51973337 | 51978495 | 5159   | 2 | 0 | 11 | 0          | 0.01767679 | 1 | 16 | 0          | 0.91308053 |
| chr3 | 51978495 | 52028981 | 50487  | 6 | 0 | 11 | 0          | 0.03       |   |    |            |            |



|      |          |          |         |    |   |    |            |            |   |    |   |            |
|------|----------|----------|---------|----|---|----|------------|------------|---|----|---|------------|
| chr3 | 53492704 | 53579702 | 86999   | 2  | 0 | 8  | 0          | 0.03209037 | 0 | 12 | 0 | 0.72109894 |
| chr3 | 53579702 | 53632989 | 53288   | 2  | 0 | 9  | 0          | 0.0331093  | 0 | 13 | 0 | 0.71538971 |
| chr3 | 53632989 | 53699768 | 66780   | 1  | 0 | 8  | 0          | 0.01767679 | 0 | 13 | 0 | 0.91308053 |
| chr3 | 53699768 | 53707078 | 7311    | 1  | 0 | 8  | 0          | 0.03209037 | 0 | 12 | 0 | 0.72109894 |
| chr3 | 53707078 | 53851470 | 144393  | 3  | 0 | 8  | 0          | 0.05490675 | 0 | 11 | 0 | 0.55623409 |
| chr3 | 53851470 | 54205015 | 353546  | 12 | 0 | 8  | 0          | 0.01767679 | 0 | 13 | 0 | 0.91308053 |
| chr3 | 54205015 | 54264485 | 59471   | 1  | 0 | 7  | 0          | 0.00859896 | 0 | 13 | 0 | 1.14735594 |
| chr3 | 54264485 | 54301899 | 37415   | 1  | 0 | 7  | 0          | 0.01667721 | 0 | 12 | 0 | 0.92532268 |
| chr3 | 54301899 | 54420758 | 118860  | 2  | 0 | 7  | 0          | 0.08584816 | 0 | 9  | 0 | 0.42015402 |
| chr3 | 54420758 | 54511105 | 90348   | 3  | 0 | 7  | 0          | 0.05232577 | 0 | 10 | 0 | 0.56314362 |
| chr3 | 54511105 | 54511164 | 60      | 1  | 0 | 7  | 0          | 0.01667721 | 0 | 12 | 0 | 0.92532268 |
| chr3 | 54511164 | 54596850 | 85687   | 2  | 0 | 7  | 0          | 0.05232577 | 0 | 10 | 0 | 0.56314362 |
| chr3 | 54596850 | 54596909 | 60      | 1  | 0 | 7  | 0          | 0.00859896 | 0 | 13 | 0 | 1.14735594 |
| chr3 | 54596909 | 54659843 | 62935   | 1  | 0 | 7  | 0          | 0.01667721 | 0 | 12 | 0 | 0.92532268 |
| chr3 | 54659843 | 54731990 | 72148   | 2  | 0 | 7  | 0          | 0.00859896 | 0 | 13 | 0 | 1.14735594 |
| chr3 | 54731990 | 54833351 | 101362  | 3  | 0 | 7  | 0          | 0.00413023 | 0 | 14 | 0 | 1.39918918 |
| chr3 | 54833351 | 54867690 | 34340   | 2  | 0 | 8  | 0          | 0.00909834 | 0 | 14 | 0 | 1.13428373 |
| chr3 | 54867690 | 54867749 | 60      | 1  | 0 | 9  | 0          | 0.01817691 | 0 | 14 | 0 | 0.90719478 |
| chr3 | 54867749 | 54959033 | 91285   | 2  | 0 | 7  | 0          | 0.01667721 | 0 | 12 | 0 | 0.92532268 |
| chr3 | 54959033 | 55000866 | 41834   | 2  | 0 | 7  | 0          | 0.00859896 | 0 | 13 | 0 | 1.14735594 |
| chr3 | 55000866 | 55092576 | 592576  | 1  | 0 | 7  | 0          | 0.00413023 | 0 | 14 | 0 | 1.39918918 |
| chr3 | 55092576 | 55180765 | 88190   | 1  | 0 | 7  | 0          | 0.00859896 | 0 | 13 | 0 | 1.14735594 |
| chr3 | 55180765 | 55375793 | 195029  | 1  | 0 | 7  | 0          | 0.05232577 | 0 | 10 | 0 | 0.56314362 |
| chr3 | 55375793 | 55503453 | 127661  | 2  | 0 | 7  | 0          | 0.03037338 | 0 | 11 | 0 | 0.73110763 |
| chr3 | 55503453 | 55510704 | 7252    | 2  | 0 | 7  | 0          | 0.00413023 | 0 | 14 | 0 | 1.39918918 |
| chr3 | 55510704 | 55542756 | 32053   | 2  | 0 | 7  | 0          | 0.00859896 | 0 | 13 | 0 | 1.14735594 |
| chr3 | 55542756 | 55620468 | 77713   | 2  | 0 | 7  | 0          | 0.03037338 | 0 | 11 | 0 | 0.73110763 |
| chr3 | 55620468 | 55691364 | 70897   | 2  | 0 | 7  | 0          | 0.00859896 | 0 | 13 | 0 | 1.14735594 |
| chr3 | 55691364 | 55692063 | 700     | 2  | 0 | 8  | 0          | 0.01767679 | 0 | 13 | 0 | 0.91308053 |
| chr3 | 55692063 | 55859685 | 167623  | 3  | 0 | 6  | 0          | 0.00373523 | 0 | 13 | 0 | 1.42397267 |
| chr3 | 55859685 | 55859744 | 60      | 1  | 0 | 7  | 0          | 0.00859896 | 0 | 13 | 0 | 1.14735594 |
| chr3 | 55859744 | 55948782 | 89039   | 2  | 0 | 7  | 0          | 0.00373523 | 0 | 13 | 0 | 1.42397267 |
| chr3 | 55948782 | 56150493 | 201712  | 5  | 0 | 7  | 0          | 0.00859896 | 0 | 13 | 0 | 1.14735594 |
| chr3 | 56150493 | 56469070 | 318578  | 7  | 0 | 6  | 0          | 0.00373523 | 0 | 13 | 0 | 1.42397267 |
| chr3 | 56469070 | 56665459 | 196390  | 3  | 0 | 6  | 0          | 0.00778066 | 0 | 12 | 0 | 1.17038931 |
| chr3 | 56665459 | 56738024 | 72566   | 2  | 0 | 6  | 0          | 0.01518174 | 0 | 11 | 0 | 0.9449689  |
| chr3 | 56738024 | 56738083 | 60      | 1  | 0 | 6  | 0          | 0.00373523 | 0 | 13 | 0 | 1.42397267 |
| chr3 | 56738083 | 56846587 | 108505  | 2  | 0 | 5  | 0          | 0.00666883 | 0 | 11 | 0 | 1.20557689 |
| chr3 | 56846587 | 56890501 | 43915   | 2  | 0 | 6  | 0          | 0.01518174 | 0 | 11 | 0 | 0.9449689  |
| chr3 | 56890501 | 56890560 | 60      | 1  | 0 | 6  | 0          | 0.00778066 | 0 | 12 | 0 | 1.17038931 |
| chr3 | 56890560 | 56974312 | 83753   | 2  | 0 | 4  | 0          | 0.00530919 | 0 | 10 | 0 | 1.2568129  |
| chr3 | 56974312 | 57004574 | 30263   | 2  | 0 | 5  | 0          | 0.01320236 | 0 | 10 | 0 | 0.97390707 |
| chr3 | 57004574 | 57059396 | 54823   | 1  | 0 | 3  | 0          | 0.00378107 | 0 | 9  | 0 | 1.33111237 |
| chr3 | 57059396 | 57104377 | 44982   | 1  | 0 | 3  | 0          | 0.0079614  | 0 | 8  | 0 | 1.07548421 |
| chr3 | 57104377 | 57106457 | 2081    | 2  | 0 | 4  | 0          | 0.01077081 | 0 | 9  | 0 | 1.01542894 |
| chr3 | 57106457 | 57156030 | 49574   | 1  | 0 | 3  | 0          | 0.0079614  | 0 | 8  | 0 | 1.07548421 |
| chr3 | 57156030 | 57156089 | 60      | 1  | 0 | 4  | 0          | 0.01077081 | 0 | 9  | 0 | 1.01542894 |
| chr3 | 57156089 | 57199594 | 43506   | 1  | 0 | 4  | 0          | 0.02074938 | 0 | 8  | 0 | 0.79906872 |
| chr3 | 57199594 | 57280132 | 80539   | 3  | 0 | 5  | 0          | 0.04407651 | 0 | 8  | 0 | 0.58747015 |
| chr3 | 57280132 | 57307137 | 27006   | 2  | 0 | 5  | 0          | 0.02473314 | 0 | 9  | 0 | 0.76806864 |
| chr3 | 57307137 | 57312440 | 5304    | 2  | 0 | 5  | 0          | 0.01320236 | 0 | 10 | 0 | 0.97390707 |
| chr3 | 57312440 | 57368535 | 56096   | 1  | 0 | 5  | 0          | 0.02473314 | 0 | 9  | 0 | 0.76806864 |
| chr3 | 57368535 | 57447339 | 78805   | 3  | 0 | 6  | 0          | 0.04875589 | 0 | 9  | 0 | 0.5732208  |
| chr3 | 57447339 | 57493398 | 46060   | 2  | 0 | 7  | 0          | 0.01667721 | 0 | 12 | 0 | 0.92532268 |
| chr3 | 57493398 | 57578459 | 85062   | 5  | 0 | 7  | 0          | 0.00859896 | 0 | 13 | 0 | 1.14735594 |
| chr3 | 57578459 | 57578518 | 60      | 1  | 0 | 7  | 0          | 0.00413023 | 0 | 14 | 0 | 1.39918918 |
| chr3 | 57578518 | 57716972 | 138455  | 4  | 0 | 7  | 0          | 0.00859896 | 0 | 13 | 0 | 1.14735594 |
| chr3 | 57716972 | 57808492 | 91521   | 2  | 0 | 7  | 0          | 0.01667721 | 0 | 12 | 0 | 0.92532268 |
| chr3 | 57808492 | 57868145 | 59654   | 2  | 0 | 7  | 0          | 0.00859896 | 0 | 13 | 0 | 1.14735594 |
| chr3 | 57868145 | 57908594 | 40450   | 3  | 0 | 8  | 0          | 0.00909834 | 0 | 14 | 0 | 1.13428373 |
| chr3 | 57908594 | 58003431 | 94838   | 3  | 0 | 7  | 0          | 0.00413023 | 0 | 14 | 0 | 1.39918918 |
| chr3 | 58003431 | 58063965 | 60535   | 2  | 0 | 7  | 0          | 0.03037338 | 0 | 11 | 0 | 0.73110763 |
| chr3 | 58063965 | 58098048 | 34084   | 2  | 0 | 7  | 0          | 0.01667721 | 0 | 12 | 0 | 0.92532268 |
| chr3 | 58098048 | 58225417 | 127370  | 3  | 0 | 6  | 0          | 0.01518174 | 0 | 11 | 0 | 0.9449689  |
| chr3 | 58225417 | 58225476 | 60      | 1  | 0 | 8  | 0          | 0.03209037 | 0 | 12 | 0 | 0.72109894 |
| chr3 | 58225476 | 58271119 | 45644   | 1  | 0 | 7  | 0          | 0.01667721 | 0 | 12 | 0 | 0.92532268 |
| chr3 | 58271119 | 58356175 | 85057   | 2  | 0 | 6  | 0          | 0.01518174 | 0 | 11 | 0 | 0.9449689  |
| chr3 | 58356175 | 58356233 | 59      | 1  | 0 | 6  | 0          | 0.00778066 | 0 | 12 | 0 | 1.17038931 |
| chr3 | 58356233 | 58413496 | 57264   | 2  | 0 | 6  | 0          | 0.02793176 | 0 | 10 | 0 | 0.74627054 |
| chr3 | 58413496 | 58480226 | 66731   | 2  | 0 | 6  | 0          | 0.04875589 | 0 | 9  | 0 | 0.5732208  |
| chr3 | 58480226 | 58482816 | 2591    | 2  | 0 | 6  | 0          | 0.02793176 | 0 | 10 | 0 | 0.74627054 |
| chr3 | 58482816 | 58484351 | 1536    | 2  | 0 | 6  | 0          | 0.04875589 | 0 | 9  | 0 | 0.5732208  |
| chr3 | 58484351 | 58552334 | 67984   | 3  | 0 | 6  | 0          | 0.02793176 | 0 | 10 | 0 | 0.74627054 |
| chr3 | 58552334 | 58552380 | 47      | 1  | 0 | 6  | 0          | 0.01518174 | 0 | 11 | 0 | 0.9449689  |
| chr3 | 58552380 | 58598577 | 46198   | 1  | 0 | 6  | 0          | 0.02793176 | 0 | 10 | 0 | 0.74627054 |
| chr3 | 58598577 | 58598636 | 60      | 1  | 0 | 7  | 0          | 0.01667721 | 0 | 12 | 0 | 0.92532268 |
| chr3 | 58598636 | 58729348 | 130713  | 2  | 0 | 6  | 0          | 0.02793176 | 0 | 10 | 0 | 0.74627054 |
| chr3 | 58729348 | 58963022 | 23675   | 5  | 0 | 7  | 0          | 0.05232577 | 0 | 10 | 0 | 0.56314362 |
| chr3 | 58963022 | 59233839 | 270818  | 4  | 0 | 9  | 0          | 0.0331093  | 0 | 13 | 0 | 0.71538971 |
| chr3 | 59233839 | 59233898 | 60      | 1  | 0 | 10 | 0          | 0.01817691 | 0 | 15 | 0 | 0.90719478 |
| chr3 | 59233898 | 59704251 | 470354  | 2  | 0 | 7  | 0          | 0.03037338 | 0 | 11 | 0 | 0.73110763 |
| chr3 | 59704251 | 59802366 | 98116   | 2  | 0 | 6  | 0          | 0.02793176 | 0 | 10 | 0 | 0.74627054 |
| chr3 | 59802366 | 59836057 | 33692   | 2  | 0 | 6  | 0          | 0.01518174 | 0 | 11 | 0 | 0.9449689  |
| chr3 | 59836057 | 59891439 | 55383   | 1  | 0 | 5  | 0          | 0.00666883 | 0 | 11 | 0 | 1.20557689 |
| chr3 | 59891439 | 59926153 | 34715   | 2  | 0 | 7  | 0          | 0.03037338 | 0 | 11 | 0 | 0.73110763 |
| chr3 | 59926153 | 59926212 | 60      | 1  | 1 | 9  | 0          | 0.0565833  | 0 | 12 | 0 | 0.55190077 |
| chr3 | 59926212 | 60011102 | 84891   | 4  | 1 | 8  | 0.30102999 | 0.03209037 | 0 | 12 | 0 | 0.72109894 |
| chr3 | 60011102 | 60088412 | 77311   | 3  | 1 | 9  | 0.30102999 | 0.0565833  | 0 | 12 | 0 | 0.55190077 |
| chr3 | 60088412 | 60142586 | 54175   | 1  | 1 | 7  | 0.30102999 | 0.01667721 | 0 | 12 | 0 | 0.92532268 |
| chr3 | 60142586 | 60292281 | 149696  | 3  | 1 | 6  | 0.30102999 | 0.01518174 | 0 | 11 | 0 | 0.9449689  |
| chr3 | 60292281 | 60331268 | 38988   | 1  | 0 | 6  | 0          | 0.01518174 | 0 | 11 | 0 | 0.9449689  |
| chr3 | 60331268 | 60472555 | 141288  | 4  | 0 | 7  | 0          | 0.03037338 | 0 | 11 | 0 | 0.73110763 |
| chr3 | 60472555 | 60522686 | 50132   | 1  | 0 | 6  | 0          | 0.01518174 | 0 | 11 | 0 | 0.9449689  |
| chr3 | 60522686 | 60597480 | 74795   | 1  | 0 | 5  | 0          | 0.01320236 | 0 | 10 | 0 | 0.97390707 |
| chr3 | 60597480 | 60684223 | 86744   | 2  | 0 | 5  | 0          | 0.02473314 | 0 | 9  | 0 | 0.76806864 |
| chr3 | 60684223 | 60684282 | 60      | 1  | 0 | 5  | 0          | 0.01320236 | 0 | 10 | 0 | 0.97390707 |
| chr3 | 60684282 | 60728525 | 44244   | 1  | 0 | 5  | 0          | 0.02473314 | 0 | 9  | 0 | 0.76806864 |
| chr3 | 60728525 | 60768201 | 39677   | 2  | 0 | 6  | 0          | 0.04875589 | 0 | 9  | 0 | 0.5732208  |
| chr3 | 60768201 | 60807716 | 39516   | 2  | 0 | 6  | 0          | 0.02793176 | 0 | 10 | 0 | 0.74627054 |
| chr3 | 60807716 | 60877562 | 69847   | 2  | 0 | 6  | 0          | 0.04875589 | 0 | 9  | 0 | 0.5732208  |
| chr3 | 60877562 | 60877621 | 60      | 1  | 0 | 6  | 0          | 0.02793176 | 0 | 10 | 0 | 0.74627054 |
| chr3 | 60877621 | 60941904 | 64284   | 1  | 0 | 6  | 0          | 0.04875589 | 0 | 9  | 0 | 0.5732208  |
| chr3 | 60941904 | 60993082 | 51179</ |    |   |    |            |            |   |    |   |            |

|      |          |          |        |   |   |    |   |            |   |    |            |            |
|------|----------|----------|--------|---|---|----|---|------------|---|----|------------|------------|
| chr3 | 62604963 | 62636769 | 31807  | 1 | 0 | 8  | 0 | 0.08923391 | 1 | 10 | 0.30102999 | 0.4167287  |
| chr3 | 62636769 | 62718641 | 81873  | 1 | 0 | 8  | 0 | 0.13872638 | 1 | 9  | 0.30102999 | 0.30102999 |
| chr3 | 62718641 | 62749547 | 30907  | 2 | 1 | 0  | 0 | 0.14135546 | 1 | 10 | 0.30102999 | 0.30102999 |
| chr3 | 62749547 | 62829648 | 80102  | 3 | 0 | 9  | 0 | 0.0565833  | 1 | 12 | 0.30102999 | 0.55190077 |
| chr3 | 62829648 | 62829707 | 60     | 1 | 0 | 10 | 0 | 0.09290028 | 1 | 12 | 0.30102999 | 0.41314172 |
| chr3 | 62829707 | 62982510 | 152804 | 2 | 0 | 9  | 0 | 0.0565833  | 1 | 12 | 0.30102999 | 0.55190077 |
| chr3 | 62982510 | 63021905 | 39396  | 2 | 0 | 0  | 0 | 0.09290028 | 1 | 12 | 0.30102999 | 0.41314172 |
| chr3 | 63021905 | 63021964 | 60     | 1 | 0 | 11 | 0 | 0.14385241 | 1 | 12 | 0.30102999 | 0.30102999 |
| chr3 | 63021964 | 63270300 | 248337 | 2 | 0 | 0  | 0 | 0.09290028 | 1 | 12 | 0.30102999 | 0.41314172 |
| chr3 | 63270300 | 63429139 | 158840 | 4 | 0 | 9  | 0 | 0.0565833  | 1 | 12 | 0.30102999 | 0.55190077 |
| chr3 | 63429139 | 63534706 | 105568 | 3 | 0 | 8  | 0 | 0.05490675 | 1 | 11 | 0.30102999 | 0.55623409 |
| chr3 | 63534706 | 63601696 | 66991  | 2 | 0 | 9  | 0 | 0.09154957 | 1 | 11 | 0.30102999 | 0.41444892 |
| chr3 | 63601696 | 63602558 | 863    | 2 | 0 | 11 | 0 | 0.14385241 | 1 | 12 | 0.30102999 | 0.30102999 |
| chr3 | 63602558 | 63749238 | 146681 | 2 | 0 | 10 | 0 | 0.21118145 | 1 | 10 | 0.30102999 | 0.21118145 |
| chr3 | 63749238 | 63749297 | 60     | 1 | 0 | 11 | 0 | 0.14385241 | 1 | 12 | 0.30102999 | 0.30102999 |
| chr3 | 63749297 | 63850382 | 101086 | 3 | 0 | 8  | 0 | 0.08923391 | 1 | 10 | 0.30102999 | 0.4167287  |
| chr3 | 63850382 | 64005029 | 154648 | 5 | 0 | 9  | 0 | 0.09154957 | 1 | 11 | 0.30102999 | 0.41444892 |
| chr3 | 64005029 | 64162112 | 157084 | 3 | 0 | 8  | 0 | 0.05490675 | 1 | 11 | 0.30102999 | 0.55623409 |
| chr3 | 64162112 | 64210840 | 48729  | 1 | 0 | 7  | 0 | 0.05232577 | 1 | 10 | 0.30102999 | 0.56314362 |
| chr3 | 64210840 | 64210899 | 60     | 1 | 0 | 8  | 0 | 0.08923391 | 1 | 10 | 0.30102999 | 0.4167287  |
| chr3 | 64210899 | 64274077 | 63179  | 1 | 0 | 6  | 0 | 0.04875989 | 1 | 9  | 0.30102999 | 0.5732208  |
| chr3 | 64274077 | 64376621 | 102545 | 1 | 0 | 6  | 0 | 0.08122616 | 1 | 8  | 0          | 0.4250187  |
| chr3 | 64376621 | 64436127 | 59507  | 2 | 0 | 6  | 0 | 0.02793176 | 1 | 10 | 0          | 0.74627054 |
| chr3 | 64436127 | 64436186 | 60     | 1 | 0 | 6  | 0 | 0.00778066 | 1 | 12 | 0          | 1.17038931 |
| chr3 | 64436186 | 64527211 | 91026  | 1 | 0 | 5  | 0 | 0.00666883 | 1 | 11 | 0          | 1.20557689 |
| chr3 | 64527211 | 64527270 | 60     | 1 | 0 | 6  | 0 | 0.01518174 | 1 | 11 | 0          | 0.9449689  |
| chr3 | 64527270 | 64600977 | 73708  | 2 | 0 | 6  | 0 | 0.04875989 | 1 | 9  | 0          | 0.5732208  |
| chr3 | 64600977 | 64666994 | 66018  | 2 | 0 | 5  | 0 | 0.02473314 | 1 | 9  | 0          | 0.76806864 |
| chr3 | 64666994 | 64782183 | 115190 | 2 | 0 | 5  | 0 | 0.04407651 | 1 | 8  | 0          | 0.58747015 |
| chr3 | 64782183 | 64859476 | 77294  | 1 | 0 | 3  | 0 | 0.01598258 | 1 | 7  | 0          | 0.84395715 |
| chr3 | 64859476 | 64962685 | 103210 | 1 | 0 | 3  | 0 | 0.03070643 | 1 | 6  | 0          | 0.63695542 |
| chr3 | 64962685 | 64962744 | 60     | 1 | 0 | 4  | 0 | 0.02074938 | 1 | 8  | 0          | 0.79906872 |
| chr3 | 64962744 | 65063442 | 100699 | 1 | 0 | 1  | 0 | 0.02438986 | 1 | 3  | 0          | 0.51676182 |
| chr3 | 65063442 | 65343024 | 279583 | 2 | 0 | 1  | 0 | 0.05404976 | 1 | 0  | 0          | 0.30102999 |
| chr3 | 65343024 | 65463087 | 120064 | 4 | 0 | 1  | 0 | 0.02438986 | 1 | 0  | 0          | 0.51676182 |
| chr3 | 65463087 | 65522030 | 58944  | 2 | 0 | 1  | 0 | 0.00478973 | 1 | 5  | 0          | 1.02643191 |
| chr3 | 65522030 | 65522089 | 60     | 1 | 0 | 1  | 0 | 8.47E-04   | 1 | 7  | 0          | 1.62048027 |
| chr3 | 65522089 | 65522195 | 30107  | 1 | 0 | 1  | 0 | 0.01091641 | 1 | 4  | 0          | 0.76005302 |
| chr3 | 65522195 | 65609289 | 57095  | 1 | 0 | 1  | 0 | 0.02438986 | 1 | 3  | 0          | 0.51676182 |
| chr3 | 65609289 | 65657597 | 48309  | 2 | 0 | 1  | 0 | 0.01091641 | 1 | 4  | 0          | 0.76005302 |
| chr3 | 65657597 | 65728429 | 70833  | 2 | 0 | 1  | 0 | 0.00478973 | 1 | 5  | 0          | 1.02643191 |
| chr3 | 65728429 | 66046077 | 317649 | 6 | 0 | 1  | 0 | 0.05404976 | 1 | 2  | 0          | 0.30102999 |
| chr3 | 66046077 | 66312513 | 266437 | 2 | 0 | 1  | 0 | 0.02438986 | 1 | 3  | 0          | 0.51676182 |
| chr3 | 66312513 | 66429429 | 116917 | 4 | 0 | 4  | 0 | 0.45545077 | 1 | 3  | 0          | 0.05670724 |
| chr3 | 66429429 | 66499834 | 74006  | 2 | 0 | 4  | 0 | 0.30102999 | 1 | 3  | 0          | 0.10122019 |
| chr3 | 66499834 | 66560836 | 61003  | 2 | 0 | 5  | 0 | 0.45545077 | 1 | 3  | 0          | 0.05670724 |
| chr3 | 66560836 | 6656437  | 95602  | 2 | 0 | 5  | 0 | 0.12309572 | 1 | 6  | 0          | 0.30102999 |
| chr3 | 6656437  | 6656496  | 60     | 1 | 0 | 5  | 0 | 0.07511598 | 1 | 7  | 0          | 0.43181735 |
| chr3 | 6656496  | 66789762 | 133267 | 1 | 0 | 5  | 0 | 0.19510895 | 1 | 5  | 0          | 0.19510895 |
| chr3 | 66789762 | 66789821 | 60     | 1 | 0 | 5  | 0 | 0.12309572 | 1 | 6  | 0          | 0.30102999 |
| chr3 | 66789821 | 66870601 | 80781  | 1 | 0 | 5  | 0 | 0.19510895 | 1 | 5  | 0          | 0.19510895 |
| chr3 | 66870601 | 66870660 | 60     | 1 | 0 | 5  | 0 | 0.12309572 | 1 | 6  | 0          | 0.30102999 |
| chr3 | 66870660 | 66930519 | 59860  | 1 | 0 | 4  | 0 | 0.11390336 | 1 | 5  | 0          | 0.30102999 |
| chr3 | 66930519 | 67013525 | 83007  | 2 | 0 | 5  | 0 | 0.19510895 | 1 | 5  | 0          | 0.19510895 |
| chr3 | 67013525 | 67054101 | 40577  | 2 | 0 | 7  | 0 | 0.30102999 | 1 | 6  | 0          | 0.129913   |
| chr3 | 67054101 | 67060463 | 6363   | 3 | 0 | 8  | 0 | 0.20764654 | 1 | 8  | 0          | 0.20764654 |
| chr3 | 67060463 | 67161871 | 101409 | 1 | 0 | 7  | 0 | 0.30102999 | 1 | 6  | 0          | 0.129913   |
| chr3 | 67161871 | 67229219 | 67349  | 2 | 0 | 7  | 0 | 0.20469099 | 1 | 7  | 0          | 0.20469099 |
| chr3 | 67229219 | 67310639 | 81421  | 2 | 0 | 7  | 0 | 0.08584816 | 1 | 9  | 0          | 0.42015402 |
| chr3 | 67310639 | 67310698 | 60     | 1 | 0 | 7  | 0 | 0.3037338  | 1 | 11 | 0          | 0.73110763 |
| chr3 | 67310698 | 67426529 | 115832 | 2 | 0 | 7  | 0 | 0.05232577 | 1 | 10 | 0          | 0.56314362 |
| chr3 | 67426529 | 67506803 | 80275  | 2 | 0 | 7  | 0 | 0.08584816 | 1 | 9  | 0          | 0.42015402 |
| chr3 | 67506803 | 67560723 | 53921  | 2 | 0 | 7  | 0 | 0.05232577 | 1 | 10 | 0          | 0.56314362 |
| chr3 | 67560723 | 67560782 | 60     | 1 | 0 | 7  | 0 | 0.03037338 | 1 | 11 | 0          | 0.73110763 |
| chr3 | 67560782 | 67891660 | 330879 | 6 | 0 | 6  | 0 | 0.01578274 | 1 | 11 | 0          | 0.9449689  |
| chr3 | 67891660 | 67891719 | 60     | 1 | 0 | 6  | 0 | 0.00858986 | 1 | 13 | 0          | 1.44735894 |
| chr3 | 67891719 | 68077107 | 185389 | 1 | 0 | 6  | 0 | 0.00375232 | 1 | 13 | 0          | 1.42397267 |
| chr3 | 68077107 | 68192539 | 115433 | 3 | 0 | 7  | 0 | 0.00183108 | 1 | 15 | 0          | 1.68336308 |
| chr3 | 68192539 | 68192598 | 60     | 1 | 0 | 10 | 0 | 0.01817691 | 1 | 15 | 0          | 0.90719478 |
| chr3 | 68192598 | 68333063 | 140466 | 3 | 0 | 8  | 0 | 0.00909834 | 1 | 14 | 0          | 1.13428373 |
| chr3 | 68333063 | 68457396 | 124334 | 2 | 0 | 7  | 0 | 0.00413023 | 1 | 14 | 0          | 1.39918918 |
| chr3 | 68457396 | 68457455 | 60     | 1 | 0 | 8  | 0 | 0.00909834 | 1 | 14 | 0          | 1.13428373 |
| chr3 | 68457455 | 68595380 | 137926 | 3 | 0 | 8  | 0 | 0.01767679 | 1 | 13 | 0          | 0.91308053 |
| chr3 | 68595380 | 68688219 | 92840  | 1 | 0 | 7  | 0 | 0.01667721 | 1 | 12 | 0          | 0.92532268 |
| chr3 | 68688219 | 68688278 | 60     | 1 | 0 | 8  | 0 | 0.03209037 | 1 | 12 | 0          | 0.72109894 |
| chr3 | 68688278 | 68780973 | 92696  | 1 | 0 | 7  | 0 | 0.01667721 | 1 | 12 | 0          | 0.92532268 |
| chr3 | 68780973 | 68874986 | 94014  | 3 | 0 | 7  | 0 | 0.00859896 | 1 | 13 | 0          | 1.14735594 |
| chr3 | 68874986 | 68875045 | 60     | 1 | 0 | 9  | 0 | 0.0331093  | 1 | 13 | 0          | 0.71538971 |
| chr3 | 68875045 | 68934354 | 59310  | 2 | 0 | 8  | 0 | 0.03209037 | 1 | 12 | 0          | 0.72109894 |
| chr3 | 68934354 | 68953606 | 19253  | 2 | 0 | 9  | 0 | 0.0331093  | 1 | 13 | 0          | 0.71538971 |
| chr3 | 68953606 | 69036632 | 83027  | 2 | 0 | 8  | 0 | 0.03209037 | 1 | 12 | 0          | 0.72109894 |
| chr3 | 69036632 | 69154209 | 115758 | 4 | 0 | 7  | 0 | 0.03037338 | 1 | 11 | 0          | 0.73110763 |
| chr3 | 69154209 | 69243229 | 89021  | 3 | 0 | 6  | 0 | 0.01518174 | 1 | 11 | 0          | 0.9449689  |
| chr3 | 69243229 | 69317896 | 74668  | 1 | 0 | 6  | 0 | 0.02793176 | 1 | 10 | 0          | 0.74627054 |
| chr3 | 69317896 | 69436836 | 118941 | 3 | 0 | 5  | 0 | 0.02473314 | 1 | 9  | 0          | 0.76806864 |
| chr3 | 69436836 | 69436895 | 60     | 1 | 0 | 5  | 0 | 0.01320236 | 1 | 10 | 0          | 0.97390707 |
| chr3 | 69436895 | 69554645 | 117751 | 2 | 0 | 4  | 0 | 0.06713722 | 1 | 6  | 0          | 0.44141547 |
| chr3 | 69554645 | 69554704 | 60     | 1 | 0 | 5  | 0 | 0.12309572 | 1 | 6  | 0          | 0.30102999 |
| chr3 | 69554704 | 69756504 | 201801 | 1 | 0 | 4  | 0 | 0.06713722 | 1 | 6  | 0          | 0.44141547 |
| chr3 | 69756504 | 69756563 | 60     | 1 | 0 | 5  | 0 | 0.07511598 | 1 | 7  | 0          | 0.43181735 |
| chr3 | 69756563 | 69912462 | 155900 | 3 | 0 | 4  | 0 | 0.03812622 | 1 | 7  | 0          | 0.60763643 |
| chr3 | 69912462 | 70161708 | 249247 | 3 | 0 | 3  | 0 | 0.10122019 | 1 | 4  | 0          | 0.30102999 |
| chr3 | 70161708 | 70161767 | 60     | 1 | 0 | 3  | 0 | 0.10122019 | 1 | 4  | 0.30102999 | 0.30102999 |
| chr3 | 70161767 | 70295249 | 133483 | 1 | 0 | 3  | 0 | 0.17593012 | 1 | 3  | 0.30102999 | 0.17593012 |
| chr3 | 70295249 | 70295308 | 60     | 1 | 0 | 3  | 0 | 0.10122019 | 1 | 4  | 0.30102999 | 0.30102999 |
| chr3 | 70295308 | 70515573 | 220266 | 1 | 0 | 2  | 0 | 0.08289318 | 1 | 3  | 0.30102999 | 0.30102999 |
| chr3 | 70515573 | 70659936 | 144364 | 2 | 0 | 3  | 0 | 0.05670724 | 1 | 5  | 0.30102999 | 0.45545077 |
| chr3 | 70659936 | 70654449 | 105514 | 2 | 0 | 3  | 0 | 0.01598258 | 1 | 7  | 0.30102999 | 0.84395715 |
| chr3 | 70654449 | 71041607 | 276159 | 4 | 0 | 3  | 0 | 0.03070643 | 1 | 6  | 0.30102999 | 0.63695542 |
| chr3 | 71041607 | 71073590 | 31984  | 2 | 0 | 4  | 0 | 0.02074938 | 1 | 8  | 0.30102999 | 0.79906872 |
| chr3 | 71073590 | 71199917 | 126238 | 3 | 0 | 4  | 0 | 0.06713722 | 1 |    |            |            |

|      |          |          |        |   |   |   |            |            |   |    |            |            |
|------|----------|----------|--------|---|---|---|------------|------------|---|----|------------|------------|
| chr3 | 74132044 | 74184593 | 52550  | 1 | 0 | 1 | 0          | 0.02438896 | 1 | 3  | 0.30102999 | 0.51676182 |
| chr3 | 74184593 | 74281126 | 96534  | 2 | 0 | 1 | 0          | 0.01091641 | 1 | 4  | 0.30102999 | 0.76005302 |
| chr3 | 74281126 | 74413474 | 132349 | 4 | 0 | 1 | 0          | 0.00478973 | 1 | 5  | 0.30102999 | 1.02643191 |
| chr3 | 74413474 | 74560348 | 146875 | 3 | 0 | 1 | 0          | 0.01091641 | 1 | 4  | 0.30102999 | 0.76005302 |
| chr3 | 74560348 | 74560407 | 60     | 1 | 0 | 3 | 0          | 0.03070643 | 2 | 6  | 0.61140001 | 0.63695542 |
| chr3 | 74560407 | 74676232 | 115826 | 1 | 0 | 2 | 0          | 0.0429175  | 2 | 4  | 0.61140001 | 0.47744371 |
| chr3 | 74676232 | 74880834 | 204603 | 1 | 0 | 1 | 0          | 0.01091641 | 2 | 4  | 0.61140001 | 0.76005302 |
| chr3 | 74880834 | 74964351 | 83518  | 1 | 0 | 1 | 0          | 0.01091641 | 1 | 4  | 0          | 0.76005302 |
| chr3 | 74964351 | 74964410 | 60     | 1 | 0 | 3 | 0          | 0.03070643 | 2 | 6  | 0.63695542 | 0.63695542 |
| chr3 | 74964410 | 75047236 | 82827  | 1 | 0 | 2 | 0          | 0.02162467 | 2 | 5  | 0          | 0.68214471 |
| chr3 | 75047236 | 75047295 | 60     | 1 | 0 | 2 | 0          | 0.01053319 | 1 | 6  | 0          | 0.91219088 |
| chr3 | 75047295 | 75767533 | 720239 | 3 | 0 | 2 | 0          | 0.02162467 | 2 | 5  | 0          | 0.68214471 |
| chr3 | 75767533 | 75936605 | 169073 | 2 | 0 | 4 | 0          | 0.06713722 | 1 | 6  | 0.30102999 | 0.44141547 |
| chr3 | 75936605 | 75936664 | 60     | 1 | 0 | 4 | 0          | 0.06713722 | 2 | 6  | 0.61140001 | 0.44141547 |
| chr3 | 75936664 | 76026268 | 89605  | 1 | 0 | 4 | 0          | 0.06713722 | 1 | 6  | 0.30102999 | 0.44141547 |
| chr3 | 76026268 | 76084202 | 57935  | 2 | 0 | 5 | 0          | 0.12309572 | 1 | 6  | 0.30102999 | 0.30102999 |
| chr3 | 76084202 | 76156912 | 72711  | 2 | 0 | 3 | 0          | 0.03070643 | 1 | 6  | 0.30102999 | 0.63695542 |
| chr3 | 76156912 | 76454834 | 297923 | 1 | 0 | 2 | 0          | 0.01053319 | 1 | 6  | 0.30102999 | 0.91219088 |
| chr3 | 76454834 | 76498893 | 44060  | 2 | 0 | 4 | 0          | 0.03812622 | 1 | 7  | 0.30102999 | 0.60763643 |
| chr3 | 76498893 | 76498952 | 60     | 1 | 0 | 6 | 1          | 0.04875589 | 1 | 9  | 0.30102999 | 0.5732208  |
| chr3 | 76498952 | 76584433 | 95532  | 2 | 0 | 1 | 0          | 0.02473314 | 1 | 9  | 0.30102999 | 0.76806864 |
| chr3 | 76584433 | 76584542 | 60     | 1 | 0 | 7 | 0          | 0.08584816 | 1 | 9  | 0.30102999 | 0.42015402 |
| chr3 | 76584542 | 76724667 | 130126 | 3 | 0 | 6 | 0          | 0.04875589 | 1 | 9  | 0.30102999 | 0.5732208  |
| chr3 | 76724667 | 76764322 | 39656  | 2 | 0 | 8 | 1          | 0.13872638 | 1 | 9  | 0.30102999 | 0.30102999 |
| chr3 | 76764322 | 76874648 | 110327 | 2 | 0 | 7 | 0          | 0.13499366 | 2 | 8  | 0.30102999 | 0.30102999 |
| chr3 | 76874648 | 76918117 | 43470  | 2 | 0 | 8 | 0          | 0.13872638 | 1 | 9  | 0.30102999 | 0.30102999 |
| chr3 | 76918117 | 77002113 | 83997  | 2 | 0 | 7 | 0          | 0.08584816 | 1 | 9  | 0.30102999 | 0.42015402 |
| chr3 | 77002113 | 77097318 | 95206  | 2 | 0 | 5 | 0          | 0.02473314 | 1 | 9  | 0.30102999 | 0.76806864 |
| chr3 | 77097318 | 77470069 | 372752 | 9 | 0 | 6 | 0          | 0.04875589 | 1 | 9  | 0.30102999 | 0.5732208  |
| chr3 | 77470069 | 77496712 | 26644  | 2 | 0 | 7 | 0          | 0.08584816 | 1 | 9  | 0.30102999 | 0.42015402 |
| chr3 | 77496712 | 77575075 | 78364  | 2 | 0 | 6 | 0          | 0.04875589 | 1 | 9  | 0.30102999 | 0.5732208  |
| chr3 | 77575075 | 77575134 | 60     | 1 | 0 | 7 | 0          | 0.08584816 | 1 | 9  | 0.30102999 | 0.42015402 |
| chr3 | 77575134 | 77607540 | 32407  | 1 | 0 | 6 | 0          | 0.08122616 | 1 | 8  | 0.30102999 | 0.4250187  |
| chr3 | 77607540 | 77820055 | 212516 | 2 | 0 | 4 | 0          | 0.03812622 | 1 | 7  | 0.30102999 | 0.60763643 |
| chr3 | 77820055 | 77820114 | 60     | 1 | 0 | 5 | 0          | 0.04407651 | 1 | 8  | 0.30102999 | 0.58747015 |
| chr3 | 77820114 | 77923996 | 103883 | 1 | 0 | 5 | 0          | 0.07511598 | 1 | 7  | 0.30102999 | 0.43181735 |
| chr3 | 77923996 | 77924055 | 60     | 1 | 0 | 6 | 0          | 0.08122616 | 1 | 8  | 0.30102999 | 0.4250187  |
| chr3 | 77924055 | 78074793 | 150739 | 1 | 0 | 5 | 0          | 0.04407651 | 1 | 8  | 0.30102999 | 0.58747015 |
| chr3 | 78074793 | 78074852 | 60     | 1 | 0 | 5 | 0          | 0.02473314 | 2 | 9  | 0.61140001 | 0.76806864 |
| chr3 | 78074852 | 78154423 | 79572  | 1 | 0 | 5 | 0          | 0.04407651 | 1 | 8  | 0.30102999 | 0.58747015 |
| chr3 | 78154423 | 78239521 | 85099  | 3 | 0 | 7 | 0          | 0.08584816 | 1 | 9  | 0.30102999 | 0.42015402 |
| chr3 | 78239521 | 78378162 | 138642 | 1 | 0 | 6 | 0          | 0.08122616 | 1 | 8  | 0.30102999 | 0.4250187  |
| chr3 | 78378162 | 78647198 | 269037 | 2 | 0 | 4 | 0          | 0.02074938 | 1 | 8  | 0.30102999 | 0.79906872 |
| chr3 | 78647198 | 78689449 | 42252  | 2 | 0 | 5 | 0          | 0.04407651 | 2 | 8  | 0.61140001 | 0.58747015 |
| chr3 | 78689449 | 78797837 | 108389 | 2 | 0 | 4 | 0          | 0.02074938 | 2 | 8  | 0.61140001 | 0.79906872 |
| chr3 | 78797837 | 78797896 | 60     | 1 | 0 | 5 | 0          | 0.04407651 | 2 | 8  | 0.61140001 | 0.58747015 |
| chr3 | 78797896 | 79203398 | 405503 | 7 | 0 | 4 | 0          | 0.02074938 | 1 | 8  | 0.30102999 | 0.79906872 |
| chr3 | 79203398 | 79203457 | 60     | 1 | 0 | 4 | 0          | 0.02074938 | 2 | 8  | 0.61140001 | 0.79906872 |
| chr3 | 79203457 | 79318928 | 115472 | 2 | 0 | 4 | 0          | 0.02074938 | 1 | 8  | 0.30102999 | 0.79906872 |
| chr3 | 79318928 | 79347798 | 28871  | 2 | 0 | 4 | 0          | 0.02074938 | 2 | 8  | 0.61140001 | 0.79906872 |
| chr3 | 79347798 | 79467905 | 120108 | 2 | 0 | 3 | 0          | 0.0079614  | 2 | 8  | 0.61140001 | 1.07548421 |
| chr3 | 79467905 | 79639015 | 171111 | 4 | 0 | 4 | 0          | 0.02074938 | 2 | 8  | 0.61140001 | 0.79906872 |
| chr3 | 79639015 | 79639072 | 58     | 1 | 0 | 4 | 0          | 0.01077081 | 2 | 9  | 0.61140001 | 1.01542894 |
| chr3 | 79639072 | 79699930 | 60859  | 1 | 0 | 3 | 0          | 0.0079614  | 1 | 8  | 0.30102999 | 1.07548421 |
| chr3 | 79699930 | 79759929 | 60000  | 1 | 0 | 3 | 0          | 0.01598258 | 1 | 7  | 0.30102999 | 0.84395715 |
| chr3 | 79759929 | 79940164 | 180236 | 2 | 0 | 1 | 0          | 0.03812622 | 1 | 7  | 0.30102999 | 0.60763643 |
| chr3 | 79940164 | 79940223 | 60     | 1 | 0 | 4 | 0          | 0.01077081 | 1 | 9  | 0.30102999 | 1.01542894 |
| chr3 | 79940223 | 80312583 | 372361 | 2 | 0 | 1 | 0          | 8.47E-04   | 1 | 7  | 0.30102999 | 1.62048027 |
| chr3 | 80312583 | 80312642 | 60     | 1 | 0 | 4 | 0          | 0.03812622 | 1 | 7  | 0.30102999 | 0.60763643 |
| chr3 | 80312642 | 80461965 | 149324 | 1 | 0 | 4 | 0          | 0.06713722 | 1 | 6  | 0          | 0.44141547 |
| chr3 | 80461965 | 80616078 | 154114 | 1 | 0 | 3 | 0          | 0.03070643 | 1 | 6  | 0          | 0.63695542 |
| chr3 | 80616078 | 80616137 | 60     | 1 | 0 | 4 | 0          | 0.06713722 | 1 | 6  | 0          | 0.44141547 |
| chr3 | 80616137 | 80991324 | 375188 | 4 | 0 | 3 | 0          | 0.03070643 | 1 | 6  | 0          | 0.63695542 |
| chr3 | 80991324 | 81201515 | 210192 | 1 | 0 | 3 | 0          | 0.05670724 | 1 | 5  | 0          | 0.45545077 |
| chr3 | 81201515 | 81201574 | 60     | 1 | 0 | 5 | 0          | 0.19510895 | 1 | 5  | 0          | 0.19510895 |
| chr3 | 81201574 | 81478254 | 276681 | 1 | 0 | 3 | 0          | 0.05670724 | 1 | 5  | 0          | 0.45545077 |
| chr3 | 81478254 | 81586100 | 107847 | 1 | 0 | 3 | 0          | 0.05670724 | 1 | 5  | 0.30102999 | 0.45545077 |
| chr3 | 81586100 | 81586159 | 60     | 1 | 0 | 4 | 0          | 0.06713722 | 1 | 6  | 0.30102999 | 0.44141547 |
| chr3 | 81586159 | 81698088 | 111930 | 2 | 0 | 3 | 0          | 0.05670724 | 1 | 5  | 0.30102999 | 0.45545077 |
| chr3 | 81698088 | 81754679 | 56592  | 2 | 1 | 3 | 0.1218695  | 0.05670724 | 1 | 5  | 0.1218695  | 0.45545077 |
| chr3 | 81754679 | 81791748 | 37070  | 2 | 1 | 4 | 0.1218695  | 0.06713722 | 1 | 6  | 0.1218695  | 0.44141547 |
| chr3 | 81791748 | 82045726 | 253979 | 2 | 1 | 3 | 0.30102999 | 0.05670724 | 1 | 5  | 0          | 0.45545077 |
| chr3 | 82045726 | 82165617 | 119892 | 2 | 0 | 3 | 0.30102999 | 0.03070643 | 1 | 6  | 0          | 0.63695542 |
| chr3 | 82165617 | 82469723 | 304107 | 4 | 0 | 3 | 0.30102999 | 0.01022019 | 1 | 4  | 0          | 0.30102999 |
| chr3 | 82469723 | 82719327 | 249605 | 3 | 1 | 2 | 0.30102999 | 0.0429175  | 1 | 4  | 0          | 0.47744371 |
| chr3 | 82719327 | 82777977 | 58651  | 1 | 2 | 2 | 0.30102999 | 0.08289318 | 1 | 3  | 0          | 0.30102999 |
| chr3 | 82777977 | 83049742 | 271766 | 2 | 0 | 2 | 0          | 0.08289318 | 1 | 3  | 0          | 0.30102999 |
| chr3 | 83049742 | 83189102 | 139361 | 1 | 0 | 1 | 0          | 0.02438896 | 1 | 3  | 0          | 0.51676182 |
| chr3 | 83189102 | 8338767  | 749666 | 4 | 0 | 0 | 0          | 0          | 0 | 2  | 0          | 0.61140001 |
| chr3 | 8338767  | 84168509 | 229743 | 2 | 0 | 1 | 0          | 0.05404976 | 1 | 2  | 0          | 0.30102999 |
| chr3 | 84168509 | 84331847 | 163339 | 2 | 0 | 3 | 0          | 0.10122019 | 0 | 4  | 0          | 0.30102999 |
| chr3 | 84331847 | 84331906 | 60     | 1 | 0 | 5 | 0          | 0.12309572 | 1 | 6  | 0          | 0.30102999 |
| chr3 | 84331906 | 84654831 | 322926 | 2 | 0 | 3 | 0          | 0.03070643 | 0 | 6  | 0          | 0.63695542 |
| chr3 | 84654831 | 84777412 | 122582 | 2 | 0 | 4 | 0          | 0.06713722 | 1 | 6  | 0.30102999 | 0.44141547 |
| chr3 | 84777412 | 84854143 | 76732  | 2 | 0 | 4 | 0          | 0.03812622 | 1 | 7  | 0.30102999 | 0.60763643 |
| chr3 | 84854143 | 84854202 | 60     | 1 | 0 | 4 | 0          | 0.01077081 | 2 | 9  | 0.61140001 | 1.01542894 |
| chr3 | 84854202 | 84959321 | 105120 | 1 | 0 | 4 | 0          | 0.01077081 | 1 | 9  | 0.30102999 | 1.01542894 |
| chr3 | 84959321 | 85017897 | 58577  | 2 | 0 | 5 | 0          | 0.01320236 | 1 | 10 | 0.30102999 | 0.97390707 |
| chr3 | 85017897 | 85119132 | 101236 | 3 | 0 | 6 | 0          | 0.01518174 | 1 | 11 | 0.30102999 | 0.94496889 |
| chr3 | 85119132 | 85119191 | 60     | 1 | 0 | 8 | 0          | 0.05490675 | 2 | 11 | 0.61140001 | 0.55623409 |
| chr3 | 85119191 | 85246245 | 127055 | 3 | 0 | 7 | 0          | 0.03037338 | 2 | 11 | 0.61140001 | 0.73110763 |
| chr3 | 85246245 | 85362677 | 116433 | 2 | 0 | 7 | 0          | 0.05232577 | 1 | 10 | 0.61140001 | 0.56314362 |
| chr3 | 85362677 | 85362736 | 60     | 1 | 0 | 8 | 0          | 0.08923391 | 3 | 10 | 0.93173516 | 0.4167287  |
| chr3 | 85362736 | 85489796 | 127061 | 3 | 0 | 6 | 0          | 0.04875589 | 3 | 9  | 0.93173516 | 0.5732208  |
| chr3 | 85489796 | 85615627 | 125832 | 2 | 0 | 6 | 0          | 0.04875589 | 2 | 9  | 0.61140001 | 0.5732208  |
| chr3 | 85615627 | 85690196 | 74570  | 1 | 0 | 6 | 0          | 0.08122616 | 2 | 8  | 0.61140001 | 0.4250187  |
| chr3 | 85690196 | 85896326 | 206131 | 6 | 0 | 7 | 0          | 0.13499366 | 2 | 8  | 0.93173516 | 0.30102999 |
| chr3 | 85896326 | 8        |        |   |   |   |            |            |   |    |            |            |

|      |           |           |        |    |   |   |            |            |   |   |            |            |
|------|-----------|-----------|--------|----|---|---|------------|------------|---|---|------------|------------|
| chr3 | 96514417  | 96561197  | 46781  | 2  | 0 | 2 | 0          | 0.0828918  | 2 | 3 | 0.6114001  | 0.30102999 |
| chr3 | 96561197  | 96635896  | 74700  | 1  | 0 | 1 | 0          | 0.02438896 | 2 | 3 | 0.6114001  | 0.51676182 |
| chr3 | 96635896  | 96674586  | 38691  | 2  | 0 | 1 | 0          | 0.01091641 | 2 | 4 | 0.6114001  | 0.76005302 |
| chr3 | 96674586  | 96674645  | 60     | 1  | 0 | 1 | 0          | 0.01091641 | 3 | 4 | 0.93173516 | 0.76005302 |
| chr3 | 96674645  | 96718305  | 43661  | 1  | 0 | 1 | 0          | 0.02438896 | 3 | 3 | 0.93173516 | 0.51676182 |
| chr3 | 96718305  | 96803210  | 84966  | 3  | 0 | 2 | 0          | 0.0828918  | 3 | 3 | 0.93173516 | 0.30102999 |
| chr3 | 96803210  | 96851351  | 48142  | 2  | 0 | 2 | 0          | 0.0429175  | 3 | 4 | 0.93173516 | 0.47744371 |
| chr3 | 96851351  | 96890667  | 39317  | 1  | 0 | 2 | 0          | 0.0828918  | 3 | 3 | 0.93173516 | 0.30102999 |
| chr3 | 96890667  | 97027202  | 136536 | 3  | 0 | 2 | 0          | 0.0429175  | 3 | 4 | 0.93173516 | 0.47744371 |
| chr3 | 97027202  | 97027261  | 60     | 1  | 1 | 2 | 0.01091641 | 0.0429175  | 4 | 4 | 0.76005302 | 0.47744371 |
| chr3 | 97027261  | 97065926  | 38666  | 1  | 0 | 2 | 0          | 0.0429175  | 3 | 4 | 0.93173516 | 0.47744371 |
| chr3 | 97065926  | 97198151  | 132226 | 3  | 0 | 1 | 0          | 0.01091641 | 4 | 4 | 0.93173516 | 0.76005302 |
| chr3 | 97198151  | 97198208  | 58     | 1  | 0 | 1 | 0          | 0.01091641 | 4 | 4 | 1.26272838 | 0.76005302 |
| chr3 | 97198208  | 97251356  | 53149  | 1  | 0 | 1 | 0          | 0.01091641 | 3 | 4 | 0.93173516 | 0.76005302 |
| chr3 | 97251356  | 97387375  | 136020 | 4  | 1 | 2 | 0.02438896 | 0.0429175  | 3 | 4 | 0.51676182 | 0.47744371 |
| chr3 | 97387375  | 97387434  | 60     | 1  | 1 | 3 | 0.02438896 | 0.10122019 | 3 | 4 | 0.51676182 | 0.30102999 |
| chr3 | 97387434  | 97510587  | 123154 | 2  | 0 | 2 | 0          | 0.10122019 | 3 | 4 | 0.93173516 | 0.30102999 |
| chr3 | 97510587  | 97583413  | 72827  | 2  | 0 | 3 | 0          | 0.05670724 | 3 | 5 | 0.93173516 | 0.45545077 |
| chr3 | 97583413  | 97634376  | 50964  | 2  | 0 | 3 | 0          | 0.03070643 | 4 | 6 | 1.26272838 | 0.63695542 |
| chr3 | 97634376  | 98107832  | 473457 | 14 | 0 | 4 | 0          | 0.06713722 | 4 | 6 | 1.26272838 | 0.44141547 |
| chr3 | 98107832  | 98217752  | 109921 | 2  | 0 | 2 | 0          | 0.02162467 | 4 | 5 | 1.26272838 | 0.68214471 |
| chr3 | 98217752  | 98237805  | 20054  | 2  | 0 | 2 | 0          | 0.05670724 | 2 | 4 | 0.45545077 | 0.45545077 |
| chr3 | 98237805  | 98300538  | 62734  | 2  | 0 | 2 | 0          | 0.0429175  | 2 | 4 | 1.26272838 | 0.47744371 |
| chr3 | 98300538  | 98376112  | 75575  | 2  | 0 | 2 | 0          | 0.02162467 | 2 | 4 | 1.26272838 | 0.68214471 |
| chr3 | 98376112  | 98425882  | 49771  | 2  | 0 | 2 | 0          | 0.02162467 | 2 | 5 | 1.60515106 | 0.68214471 |
| chr3 | 98425882  | 98519608  | 93727  | 5  | 0 | 3 | 0          | 0.05670724 | 2 | 5 | 1.60515106 | 0.45545077 |
| chr3 | 98519608  | 98600450  | 80843  | 3  | 0 | 3 | 0          | 0.10122019 | 2 | 4 | 1.60515106 | 0.30102999 |
| chr3 | 98600450  | 98707794  | 107345 | 1  | 0 | 2 | 0          | 0.0429175  | 5 | 4 | 1.60515106 | 0.47744371 |
| chr3 | 98707794  | 98923250  | 215457 | 1  | 0 | 1 | 0          | 0.01091641 | 4 | 4 | 1.26272838 | 0.76005302 |
| chr3 | 98923250  | 98923309  | 60     | 1  | 0 | 2 | 0          | 0.02162467 | 4 | 5 | 1.26272838 | 0.68214471 |
| chr3 | 98923309  | 99092014  | 168706 | 1  | 0 | 1 | 0          | 0.01091641 | 4 | 4 | 1.26272838 | 0.76005302 |
| chr3 | 99092014  | 99361512  | 269499 | 3  | 0 | 1 | 0          | 0.01091641 | 5 | 4 | 1.60515106 | 0.76005302 |
| chr3 | 99361512  | 99394565  | 33054  | 2  | 0 | 2 | 0          | 0.0429175  | 5 | 4 | 1.60515106 | 0.47744371 |
| chr3 | 99394565  | 99449158  | 54594  | 1  | 0 | 1 | 0          | 0.01091641 | 4 | 4 | 1.60515106 | 0.76005302 |
| chr3 | 99449158  | 99449217  | 60     | 1  | 1 | 1 | 0.00478973 | 0.01091641 | 5 | 4 | 1.02643191 | 0.76005302 |
| chr3 | 99449217  | 99800234  | 351018 | 7  | 1 | 1 | 0.01091641 | 0.02438896 | 4 | 3 | 0.76005302 | 0.51676182 |
| chr3 | 99800234  | 100058793 | 258560 | 8  | 1 | 1 | 0.01091641 | 0.01091641 | 4 | 4 | 0.76005302 | 0.76005302 |
| chr3 | 100058793 | 100179891 | 121099 | 2  | 1 | 1 | 0.02438896 | 0.01091641 | 3 | 4 | 0.51676182 | 0.76005302 |
| chr3 | 100179891 | 100287758 | 107868 | 5  | 1 | 2 | 0.02438896 | 0.0429175  | 3 | 4 | 0.51676182 | 0.47744371 |
| chr3 | 100287758 | 100487464 | 199707 | 6  | 1 | 2 | 0.01091641 | 0.0429175  | 4 | 4 | 0.76005302 | 0.47744371 |
| chr3 | 100487464 | 101023092 | 535629 | 9  | 1 | 2 | 0.02438896 | 0.0429175  | 4 | 4 | 0.51676182 | 0.47744371 |
| chr3 | 101023092 | 101140101 | 117010 | 3  | 1 | 2 | 0.02438896 | 0.0828918  | 3 | 3 | 0.51676182 | 0.30102999 |
| chr3 | 101140101 | 101369031 | 228931 | 6  | 1 | 2 | 0.02438896 | 0.0429175  | 3 | 4 | 0.51676182 | 0.47744371 |
| chr3 | 101369031 | 101401286 | 32256  | 1  | 1 | 2 | 0.02438896 | 0.0828918  | 3 | 3 | 0.51676182 | 0.30102999 |
| chr3 | 101401286 | 101481600 | 80415  | 2  | 0 | 1 | 0          | 0.05404976 | 0 | 2 | 0.93173516 | 0.30102999 |
| chr3 | 101481600 | 101535734 | 54135  | 3  | 0 | 2 | 0          | 0.0828918  | 3 | 3 | 0.93173516 | 0.30102999 |
| chr3 | 101535734 | 101535793 | 60     | 1  | 0 | 2 | 0          | 0.0429175  | 3 | 4 | 0.93173516 | 0.47744371 |
| chr3 | 101535793 | 101576165 | 40373  | 3  | 0 | 2 | 0          | 0.1575501  | 3 | 2 | 0.93173516 | 0.1575501  |
| chr3 | 101576165 | 101987827 | 411663 | 6  | 0 | 1 | 0          | 0.05404976 | 0 | 2 | 0.93173516 | 0.30102999 |
| chr3 | 101987827 | 102052187 | 64361  | 1  | 0 | 0 | 0          | 0          | 3 | 2 | 0.93173516 | 0.61140001 |
| chr3 | 102052187 | 102058218 | 6032   | 3  | 1 | 0 | 0.02438896 | 0          | 3 | 2 | 0.51676182 | 0.61140001 |
| chr3 | 102058218 | 102219027 | 160810 | 2  | 1 | 0 | 0.02438896 | 0          | 3 | 1 | 0.51676182 | 0.30102999 |
| chr3 | 102219027 | 102452797 | 233771 | 2  | 0 | 0 | 0          | 0          | 3 | 1 | 0.93173516 | 0.30102999 |
| chr3 | 102452797 | 102546125 | 93329  | 1  | 0 | 1 | 0          | 0          | 2 | 1 | 0.61140001 | 0.30102999 |
| chr3 | 102546125 | 102949572 | 403448 | 3  | 0 | 0 | 0          | 0          | 2 | 0 | 0.61140001 | 0          |
| chr3 | 102949572 | 103013579 | 64008  | 2  | 0 | 0 | 0          | 0          | 2 | 1 | 0.61140001 | 0.30102999 |
| chr3 | 103013579 | 103567529 | 553951 | 3  | 0 | 0 | 0          | 0          | 1 | 1 | 0.30102999 | 0.30102999 |
| chr3 | 103567529 | 103982720 | 415192 | 4  | 1 | 0 | 0          | 0          | 1 | 0 | 0.30102999 | 0          |
| chr3 | 103982720 | 104147170 | 164451 | 2  | 0 | 0 | 0          | 0          | 2 | 0 | 0.61140001 | 0          |
| chr3 | 104147170 | 104264937 | 117768 | 2  | 0 | 0 | 0          | 0.02438896 | 0 | 0 | 0.93173516 | 0          |
| chr3 | 104264937 | 104429016 | 164080 | 2  | 1 | 0 | 0.02438896 | 0          | 3 | 0 | 0.51676182 | 0          |
| chr3 | 104429016 | 104429075 | 60     | 1  | 2 | 0 | 0.0429175  | 0          | 4 | 0 | 0.47744371 | 0          |
| chr3 | 104429075 | 104522243 | 93169  | 4  | 1 | 0 | 0.01091641 | 0          | 4 | 0 | 0.76005302 | 0          |
| chr3 | 104522243 | 104964233 | 441991 | 1  | 0 | 1 | 0.01091641 | 0          | 1 | 0 | 0.76005302 | 0.30102999 |
| chr3 | 104964233 | 104964292 | 60     | 1  | 1 | 1 | 0.01091641 | 0          | 4 | 2 | 0.76005302 | 0.30102999 |
| chr3 | 104964292 | 105115687 | 151396 | 2  | 1 | 1 | 0.01091641 | 0.05404976 | 4 | 1 | 0.76005302 | 0.1218695  |
| chr3 | 105115687 | 105294238 | 178552 | 6  | 1 | 1 | 0.01091641 | 0.1218695  | 4 | 0 | 0.76005302 | 0.1218695  |
| chr3 | 105294238 | 105378304 | 84067  | 1  | 1 | 0 | 0.01091641 | 0.30102999 | 4 | 0 | 0.76005302 | 0          |
| chr3 | 105378304 | 105404293 | 25990  | 2  | 0 | 0 | 0.00478973 | 0          | 5 | 1 | 1.02643191 | 0.30102999 |
| chr3 | 105404293 | 105464779 | 60487  | 1  | 1 | 0 | 0.01091641 | 0          | 4 | 0 | 0.76005302 | 0          |
| chr3 | 105464779 | 105496033 | 31255  | 2  | 0 | 0 | 0.00478973 | 0          | 5 | 0 | 1.02643191 | 0          |
| chr3 | 105496033 | 105572391 | 76539  | 1  | 1 | 0 | 0.01091641 | 0          | 4 | 0 | 0.76005302 | 0          |
| chr3 | 105572391 | 105602953 | 30563  | 2  | 1 | 0 | 0.01091641 | 0          | 1 | 0 | 0.76005302 | 0.30102999 |
| chr3 | 105602953 | 105840810 | 237858 | 3  | 1 | 0 | 0.01091641 | 0          | 4 | 2 | 0.76005302 | 0.61140001 |
| chr3 | 105840810 | 105840869 | 60     | 1  | 1 | 1 | 0.00478973 | 0.05404976 | 5 | 2 | 1.02643191 | 0.30102999 |
| chr3 | 105840869 | 106228514 | 387646 | 3  | 1 | 0 | 0.00478973 | 0          | 5 | 0 | 1.02643191 | 0          |
| chr3 | 106228514 | 106228573 | 60     | 1  | 0 | 0 | 0.00204627 | 0          | 6 | 0 | 1.31360216 | 0          |
| chr3 | 106228573 | 106269524 | 40952  | 1  | 1 | 0 | 0.00478973 | 0          | 5 | 0 | 1.02643191 | 0          |
| chr3 | 106269524 | 106309142 | 39619  | 1  | 0 | 0 | 0.01091641 | 0          | 4 | 0 | 0.76005302 | 0          |
| chr3 | 106309142 | 106579618 | 270477 | 3  | 1 | 1 | 0.01091641 | 0.30102999 | 4 | 0 | 0.76005302 | 0          |
| chr3 | 106579618 | 106579677 | 60     | 1  | 3 | 1 | 0.10122019 | 0.30102999 | 4 | 0 | 0.30102999 | 0          |
| chr3 | 106579677 | 106840784 | 261108 | 3  | 2 | 1 | 0.0429175  | 0.30102999 | 4 | 0 | 0.47744371 | 0          |
| chr3 | 106840784 | 106942747 | 101964 | 2  | 3 | 1 | 0.10122019 | 0.30102999 | 4 | 0 | 0.30102999 | 0          |
| chr3 | 106942747 | 107016343 | 73597  | 2  | 3 | 1 | 0.05670724 | 0.30102999 | 5 | 0 | 0.45545077 | 0          |
| chr3 | 107016343 | 107016402 | 60     | 1  | 3 | 1 | 0.03070643 | 0.30102999 | 6 | 0 | 0.63695542 | 0          |
| chr3 | 107016402 | 107096646 | 80245  | 1  | 3 | 1 | 0.05670724 | 0.30102999 | 5 | 0 | 0.45545077 | 0          |
| chr3 | 107096646 | 107204000 | 107355 | 2  | 3 | 1 | 0.03070643 | 0.30102999 | 6 | 0 | 0.63695542 | 0          |
| chr3 | 107204000 | 107379608 | 175609 | 5  | 3 | 1 | 0.01598258 | 0.30102999 | 7 | 0 | 0.84395715 | 0          |
| chr3 | 107379608 | 107379667 | 60     | 1  | 4 | 1 | 0.03812622 | 0.30102999 | 7 | 0 | 0.60763643 | 0          |
| chr3 | 107379667 | 107447665 | 67999  | 1  | 4 | 1 | 0.06713722 | 0.30102999 | 6 | 0 | 0.44141547 | 0          |
| chr3 | 107447665 | 107599677 | 152013 | 3  | 4 | 1 | 0.11390336 | 0.30102999 | 5 | 0 | 0.30102999 | 0          |
| chr3 | 107599677 | 107599736 | 60     | 1  | 4 | 1 | 0.03812622 | 0.30102999 | 7 | 0 | 0.60763643 | 0          |
| chr3 | 107599736 | 107676327 | 76592  | 1  | 3 | 1 | 0.01598258 | 0.30102999 | 7 | 0 | 0.84395715 | 0          |
| chr3 | 107676327 | 107894872 | 218546 | 8  | 3 | 1 | 0.01598258 | 0.1218695  | 7 | 1 | 0.84395715 | 0.1218695  |
| chr3 | 107894872 | 107894931 | 60     | 1  | 3 | 1 | 0.01598258 | 0.05404976 | 7 | 2 | 0.84395715 | 0.30102999 |
| chr3 | 107894931 | 107974670 | 79740  | 2  |   |   |            |            |   |   |            |            |

|      |           |           |        |    |   |   |            |            |   |   |            |            |
|------|-----------|-----------|--------|----|---|---|------------|------------|---|---|------------|------------|
| chr3 | 111542889 | 111685401 | 142513 | 5  | 2 | 0 | 0.0429175  | 0          | 4 | 2 | 0.47744371 | 0.61140001 |
| chr3 | 111685401 | 111711404 | 26004  | 3  | 2 | 0 | 0.0429175  | 0          | 4 | 3 | 0.47744371 | 0.93173516 |
| chr3 | 111711404 | 111729387 | 17984  | 3  | 2 | 0 | 0.0429175  | 0          | 4 | 4 | 0.47744371 | 1.26272838 |
| chr3 | 111729387 | 111782247 | 52861  | 1  | 2 | 0 | 0.0429175  | 0          | 4 | 3 | 0.47744371 | 0.93173516 |
| chr3 | 111782247 | 111812291 | 30045  | 2  | 2 | 0 | 0.0429175  | 0          | 4 | 4 | 0.47744371 | 1.26272838 |
| chr3 | 111812291 | 111812349 | 59     | 1  | 2 | 0 | 0.0429175  | 0          | 4 | 5 | 0.47744371 | 1.60515106 |
| chr3 | 111812349 | 111849865 | 37517  | 4  | 2 | 0 | 0.0429175  | 0          | 4 | 4 | 0.47744371 | 1.26272838 |
| chr3 | 111849865 | 111887735 | 37871  | 1  | 2 | 0 | 0.0429175  | 0          | 4 | 3 | 0.47744371 | 0.93173516 |
| chr3 | 111887735 | 111958710 | 70976  | 2  | 2 | 0 | 0.0429175  | 0          | 4 | 2 | 0.47744371 | 0.61140001 |
| chr3 | 111958710 | 112051487 | 92778  | 3  | 2 | 0 | 0.0429175  | 0          | 4 | 3 | 0.47744371 | 0.93173516 |
| chr3 | 112051487 | 112152600 | 101114 | 4  | 2 | 0 | 0.0429175  | 0          | 4 | 4 | 0.47744371 | 1.26272838 |
| chr3 | 112152600 | 112329039 | 176440 | 5  | 2 | 0 | 0.02162467 | 0          | 5 | 4 | 0.68214471 | 1.26272838 |
| chr3 | 112329039 | 112429568 | 100530 | 4  | 2 | 0 | 0.01053319 | 0          | 6 | 6 | 0.91219088 | 1.95986592 |
| chr3 | 112429568 | 112576244 | 146677 | 2  | 2 | 0 | 0.02162467 | 0          | 5 | 6 | 0.68214471 | 1.95986592 |
| chr3 | 112576244 | 112686563 | 110320 | 2  | 2 | 0 | 0.0429175  | 0          | 4 | 4 | 0.47744371 | 1.26272838 |
| chr3 | 112686563 | 112711385 | 24823  | 2  | 2 | 0 | 0.0429175  | 0          | 4 | 5 | 0.47744371 | 1.60515106 |
| chr3 | 112711385 | 112723889 | 12505  | 2  | 2 | 0 | 0.0429175  | 0          | 4 | 6 | 0.47744371 | 1.95986592 |
| chr3 | 112723889 | 112872231 | 148343 | 2  | 2 | 0 | 0.0429175  | 0          | 4 | 5 | 0.47744371 | 1.60515106 |
| chr3 | 112872231 | 112872290 | 60     | 1  | 2 | 0 | 0.02162467 | 0          | 5 | 5 | 0.68214471 | 1.60515106 |
| chr3 | 112872290 | 113162786 | 290497 | 7  | 2 | 0 | 0.0429175  | 0          | 4 | 5 | 0.47744371 | 1.60515106 |
| chr3 | 113162786 | 113253337 | 62552  | 2  | 3 | 0 | 0.05670724 | 0          | 5 | 5 | 0.45545077 | 1.60515106 |
| chr3 | 113253337 | 113253996 | 60     | 1  | 3 | 0 | 0.03070643 | 0          | 6 | 5 | 0.63655442 | 1.60515106 |
| chr3 | 113253996 | 113253681 | 28286  | 1  | 3 | 0 | 0.05670724 | 0          | 5 | 4 | 0.45545077 | 1.26272838 |
| chr3 | 113253681 | 113309157 | 55477  | 2  | 3 | 0 | 0.05670724 | 0          | 5 | 3 | 0.45545077 | 0.93173516 |
| chr3 | 113309157 | 113348129 | 38973  | 1  | 2 | 0 | 0.02162467 | 0          | 5 | 3 | 0.68214471 | 0.93173516 |
| chr3 | 113348129 | 113410537 | 62409  | 2  | 0 | 0 | 0.01053319 | 0          | 6 | 3 | 0.91219088 | 0.93173516 |
| chr3 | 113410537 | 113410596 | 60     | 1  | 2 | 0 | 0.01053319 | 0          | 6 | 5 | 0.91219088 | 1.60515106 |
| chr3 | 113410596 | 113524332 | 113737 | 2  | 2 | 0 | 0.02162467 | 0          | 5 | 5 | 0.68214471 | 1.60515106 |
| chr3 | 113524332 | 113524391 | 60     | 1  | 2 | 0 | 0.01053319 | 0          | 6 | 5 | 0.91219088 | 1.60515106 |
| chr3 | 113524391 | 113679817 | 155427 | 3  | 2 | 0 | 0.02162467 | 0          | 5 | 3 | 0.68214471 | 0.93173516 |
| chr3 | 113679817 | 113679876 | 60     | 1  | 3 | 0 | 0.05670724 | 0          | 5 | 3 | 0.45545077 | 0.93173516 |
| chr3 | 113679876 | 113729283 | 49408  | 1  | 3 | 0 | 0.05670724 | 0          | 5 | 1 | 0.45545077 | 0.30102999 |
| chr3 | 113729283 | 113729342 | 60     | 1  | 4 | 0 | 0.11390336 | 0          | 5 | 1 | 0.30102999 | 0.30102999 |
| chr3 | 113729342 | 113897648 | 168307 | 6  | 3 | 0 | 0.05670724 | 0          | 5 | 1 | 0.45545077 | 0.30102999 |
| chr3 | 113897648 | 114005609 | 107962 | 2  | 3 | 0 | 0.10122019 | 0          | 4 | 1 | 0.30102999 | 0.30102999 |
| chr3 | 114005609 | 114005668 | 60     | 1  | 3 | 0 | 0.05670724 | 0          | 5 | 1 | 0.45545077 | 0.30102999 |
| chr3 | 114005668 | 114134010 | 128343 | 4  | 3 | 0 | 0.10122019 | 0          | 4 | 1 | 0.30102999 | 0.30102999 |
| chr3 | 114134010 | 114260384 | 126375 | 3  | 3 | 0 | 0.17593012 | 0          | 3 | 1 | 0.17593012 | 0.30102999 |
| chr3 | 114260384 | 114260443 | 60     | 1  | 3 | 0 | 0.10122019 | 0          | 4 | 1 | 0.30102999 | 0.30102999 |
| chr3 | 114260443 | 114419438 | 158996 | 3  | 3 | 0 | 0.17593012 | 0          | 3 | 1 | 0.17593012 | 0.30102999 |
| chr3 | 114419438 | 114522521 | 103084 | 3  | 4 | 0 | 0.18734596 | 0          | 4 | 1 | 0.18734596 | 0.30102999 |
| chr3 | 114522521 | 114737921 | 215401 | 4  | 3 | 0 | 0.10122019 | 0          | 4 | 1 | 0.30102999 | 0.30102999 |
| chr3 | 114737921 | 114737980 | 60     | 1  | 3 | 0 | 0.10122019 | 0          | 4 | 2 | 0.30102999 | 0.61140001 |
| chr3 | 114737980 | 114801176 | 63197  | 2  | 0 | 0 | 0.0429175  | 0          | 4 | 2 | 0.47744371 | 0.61140001 |
| chr3 | 114801176 | 115046957 | 245782 | 4  | 2 | 0 | 0.0429175  | 0          | 4 | 0 | 0.47744371 | 0          |
| chr3 | 115046957 | 115198347 | 151391 | 3  | 2 | 0 | 0.0429175  | 0          | 4 | 1 | 0.47744371 | 0.30102999 |
| chr3 | 115198347 | 115198406 | 60     | 1  | 2 | 0 | 0.0429175  | 0          | 4 | 2 | 0.47744371 | 0.61140001 |
| chr3 | 115198406 | 115373790 | 175385 | 3  | 2 | 0 | 0.0429175  | 0          | 4 | 1 | 0.47744371 | 0.30102999 |
| chr3 | 115373790 | 115439972 | 66183  | 2  | 2 | 0 | 0.0429175  | 0          | 4 | 2 | 0.47744371 | 0.61140001 |
| chr3 | 115439972 | 115440031 | 60     | 1  | 2 | 0 | 0.0429175  | 0          | 4 | 3 | 0.47744371 | 0.93173516 |
| chr3 | 115440031 | 116085339 | 645309 | 12 | 2 | 0 | 0.0429175  | 0          | 4 | 1 | 0.47744371 | 0.30102999 |
| chr3 | 116085339 | 116233223 | 147885 | 3  | 2 | 0 | 0.08289318 | 0          | 3 | 1 | 0.30102999 | 0.30102999 |
| chr3 | 116233223 | 116460128 | 226906 | 3  | 1 | 0 | 0.02438896 | 0          | 3 | 1 | 0.51676182 | 0.30102999 |
| chr3 | 116460128 | 116587439 | 127312 | 1  | 0 | 0 | 0          | 0          | 3 | 1 | 0.93173516 | 0.30102999 |
| chr3 | 116587439 | 116615441 | 28003  | 1  | 0 | 0 | 0          | 0          | 3 | 0 | 0.93173516 | 0          |
| chr3 | 116615441 | 116615500 | 60     | 1  | 1 | 0 | 0.02438896 | 0          | 3 | 0 | 0.51676182 | 0          |
| chr3 | 116615500 | 116691055 | 75556  | 1  | 0 | 0 | 0          | 0          | 3 | 0 | 0.93173516 | 0          |
| chr3 | 116691055 | 116795512 | 104458 | 2  | 0 | 0 | 0          | 0          | 3 | 1 | 0.93173516 | 0.30102999 |
| chr3 | 116795512 | 116795571 | 60     | 1  | 1 | 0 | 0.02438896 | 0          | 3 | 1 | 0.51676182 | 0.30102999 |
| chr3 | 116795571 | 116898300 | 102730 | 1  | 0 | 0 | 0          | 0          | 2 | 1 | 0.61140001 | 0.30102999 |
| chr3 | 116898300 | 117166718 | 268419 | 1  | 0 | 0 | 0          | 0          | 1 | 1 | 0.30102999 | 0.30102999 |
| chr3 | 117166718 | 117600150 | 83766  | 2  | 0 | 0 | 0          | 0          | 1 | 0 | 0.30102999 | 0          |
| chr3 | 117600150 | 11780353  | 180204 | 2  | 0 | 0 | 0          | 0          | 1 | 1 | 0.30102999 | 0.30102999 |
| chr3 | 11780353  | 117950181 | 169829 | 1  | 0 | 0 | 0          | 0          | 0 | 1 | 0          | 0          |
| chr3 | 117950181 | 118153943 | 209163 | 2  | 0 | 0 | 0          | 0          | 0 | 2 | 0          | 0.61140001 |
| chr3 | 118153943 | 118159402 | 60     | 1  | 0 | 0 | 0          | 0          | 2 | 5 | 0.61140001 | 1.60515106 |
| chr3 | 118159402 | 118326121 | 166720 | 2  | 0 | 0 | 0          | 0          | 2 | 4 | 0.61140001 | 1.26272838 |
| chr3 | 118326121 | 118408189 | 83069  | 2  | 0 | 0 | 0          | 0          | 2 | 5 | 0.61140001 | 1.60515106 |
| chr3 | 118408189 | 118747220 | 339032 | 6  | 0 | 0 | 0          | 0          | 2 | 4 | 0.61140001 | 1.26272838 |
| chr3 | 118747220 | 118824903 | 77684  | 3  | 0 | 1 | 0          | 0.01091641 | 3 | 4 | 0.93173516 | 0.76005302 |
| chr3 | 118824903 | 118937563 | 112661 | 3  | 0 | 1 | 0          | 0.01091641 | 2 | 4 | 0.61140001 | 0.76005302 |
| chr3 | 118937563 | 119112245 | 174683 | 5  | 0 | 2 | 0          | 0.02162467 | 3 | 5 | 0.93173516 | 0.68214471 |
| chr3 | 119112245 | 119393750 | 281506 | 13 | 0 | 1 | 0          | 0.00478973 | 3 | 5 | 0.93173516 | 1.02643191 |
| chr3 | 119393750 | 119500867 | 107118 | 3  | 0 | 0 | 0.01091641 | 0          | 3 | 4 | 0.93173516 | 0.76005302 |
| chr3 | 119500867 | 119562169 | 61303  | 2  | 0 | 2 | 0          | 0.0429175  | 3 | 4 | 0.93173516 | 0.47744371 |
| chr3 | 119562169 | 119562227 | 59     | 1  | 0 | 2 | 0          | 0.02162467 | 3 | 5 | 0.93173516 | 0.68214471 |
| chr3 | 119562227 | 119720946 | 158720 | 3  | 0 | 0 | 0.01091641 | 0          | 4 | 5 | 0.93173516 | 0.76005302 |
| chr3 | 119720946 | 119778347 | 57402  | 1  | 0 | 1 | 0          | 0.02438896 | 3 | 3 | 0.93173516 | 0.51676182 |
| chr3 | 119778347 | 119812513 | 34167  | 2  | 0 | 0 | 0.01091641 | 0          | 3 | 4 | 0.93173516 | 0.76005302 |
| chr3 | 119812513 | 119842433 | 29921  | 1  | 0 | 1 | 0          | 0.05404976 | 2 | 2 | 0.93173516 | 0.30102999 |
| chr3 | 119842433 | 119903983 | 61551  | 2  | 0 | 1 | 0          | 0.05404976 | 2 | 2 | 1.60515106 | 0.30102999 |
| chr3 | 119903983 | 119904042 | 60     | 1  | 0 | 1 | 0          | 0.05404976 | 6 | 2 | 1.95986592 | 0.30102999 |
| chr3 | 119904042 | 119946568 | 42527  | 1  | 0 | 1 | 0          | 0.1218695  | 6 | 1 | 1.95986592 | 0.1218695  |
| chr3 | 119946568 | 120005319 | 58752  | 2  | 1 | 1 | 0.00204627 | 0.1218695  | 6 | 1 | 1.31360226 | 0.1218695  |
| chr3 | 120005319 | 120005377 | 59     | 1  | 1 | 1 | 0.00204627 | 0.02438896 | 6 | 3 | 1.31360226 | 0.51676182 |
| chr3 | 120005377 | 120081841 | 76465  | 1  | 1 | 1 | 0.00204627 | 0.05404976 | 6 | 2 | 1.31360226 | 0.30102999 |
| chr3 | 120081841 | 120163070 | 81230  | 3  | 1 | 1 | 0.00204627 | 0.1218695  | 6 | 1 | 1.31360226 | 0.1218695  |
| chr3 | 120163070 | 120247727 | 84658  | 1  | 0 | 1 | 0          | 0.1218695  | 4 | 1 | 1.26272838 | 0.1218695  |
| chr3 | 120247727 | 120247786 | 60     | 1  | 0 | 1 | 0          | 0.05404976 | 4 | 2 | 1.26272838 | 0.30102999 |
| chr3 | 120247786 | 120420573 | 172788 | 1  | 0 | 1 | 0          | 0.05404976 | 3 | 2 | 0.93173516 | 0.30102999 |
| chr3 | 120420573 | 120477195 | 56623  | 2  | 1 | 0 | 0.02438896 | 0.05404976 | 3 | 2 | 0.51676182 | 0.30102999 |
| chr3 | 120477195 | 120558027 | 80833  | 2  | 1 | 1 | 0.02438896 | 0.02438896 | 3 | 3 | 0.51676182 | 0.51676182 |
| chr3 | 120558027 | 120663836 | 105810 | 3  | 1 | 1 | 0.01091641 | 0.02438896 | 4 | 3 | 0.76005302 | 0.51676182 |
| chr3 | 120663836 | 120874780 | 210945 | 4  | 1 | 1 | 0.01091641 | 0.05404976 | 4 | 4 | 0.76005302 | 0.30102999 |
| chr3 | 120874780 | 120988822 | 114043 | 4  | 1 | 1 | 0.00478973 | 0.02438896 | 5 | 3 | 1.02643191 | 0.51676182 |
| chr3 | 120988822 | 121150821 | 162000 | 3  | 1 | 1 |            |            |   |   |            |            |

|      |           |           |        |    |   |   |            |            |   |   |            |            |
|------|-----------|-----------|--------|----|---|---|------------|------------|---|---|------------|------------|
| chr3 | 123632380 | 123632425 | 46     | 2  | 2 | 0 | 0.0429175  | 0          | 4 | 3 | 0.47744371 | 0.93173516 |
| chr3 | 123632425 | 123649920 | 17496  | 1  | 2 | 0 | 0.0429175  | 0          | 4 | 2 | 0.47744371 | 0.61140001 |
| chr3 | 123649920 | 123649979 | 60     | 1  | 3 | 1 | 0.10122019 | 0.02438896 | 4 | 3 | 0.30102999 | 0.51676182 |
| chr3 | 123649979 | 123780392 | 130414 | 2  | 3 | 1 | 0.10122019 | 0.05404976 | 4 | 2 | 0.30102999 | 0.30102999 |
| chr3 | 123780392 | 123902747 | 122356 | 2  | 3 | 0 | 0.10122019 | 0          | 4 | 1 | 0.30102999 | 0.30102999 |
| chr3 | 123902747 | 124462924 | 560178 | 13 | 3 | 1 | 0.10122019 | 0.05404976 | 4 | 2 | 0.30102999 | 0.30102999 |
| chr3 | 124462924 | 124502599 | 39676  | 2  | 3 | 2 | 0.10122019 | 0.1575501  | 4 | 2 | 0.30102999 | 0.1575501  |
| chr3 | 124502599 | 124574302 | 71704  | 2  | 3 | 2 | 0.10122019 | 0.30102999 | 4 | 1 | 0.30102999 | 0.05404976 |
| chr3 | 124574302 | 124646517 | 72216  | 2  | 3 | 1 | 0.17593012 | 0.30102999 | 3 | 0 | 0.17593012 | 0          |
| chr3 | 124646517 | 124719924 | 73408  | 2  | 3 | 1 | 0.08289318 | 0.30102999 | 3 | 0 | 0.30102999 | 0          |
| chr3 | 124719924 | 124759708 | 39785  | 2  | 2 | 1 | 0.08289318 | 0.1218695  | 3 | 1 | 0.30102999 | 0.1218695  |
| chr3 | 124759708 | 124759767 | 60     | 1  | 2 | 1 | 0.08289318 | 0.05404976 | 3 | 2 | 0.30102999 | 0.30102999 |
| chr3 | 124759767 | 124854580 | 94814  | 2  | 2 | 1 | 0.08289318 | 0.30102999 | 3 | 0 | 0.30102999 | 0          |
| chr3 | 124854580 | 124854635 | 56     | 1  | 2 | 1 | 0.08289318 | 0.00478973 | 3 | 5 | 0.30102999 | 1.02643191 |
| chr3 | 124854635 | 124951101 | 96467  | 2  | 2 | 0 | 0.08289318 | 0          | 3 | 3 | 0.30102999 | 0.93173516 |
| chr3 | 124951101 | 124997963 | 46863  | 2  | 2 | 0 | 0.08289318 | 0          | 3 | 4 | 0.30102999 | 1.26272838 |
| chr3 | 124997963 | 124998022 | 60     | 1  | 2 | 0 | 0.08289318 | 0          | 3 | 5 | 0.30102999 | 1.60515106 |
| chr3 | 124998022 | 125193821 | 195800 | 4  | 2 | 0 | 0.08289318 | 0          | 3 | 4 | 0.30102999 | 1.26272838 |
| chr3 | 125193821 | 125208259 | 14439  | 2  | 2 | 1 | 0.08289318 | 0.01091641 | 3 | 4 | 0.30102999 | 0.76005302 |
| chr3 | 125208259 | 125267023 | 58765  | 2  | 2 | 1 | 0.08289318 | 0.02438896 | 3 | 3 | 0.30102999 | 0.51676182 |
| chr3 | 125267023 | 125305163 | 38141  | 2  | 2 | 1 | 0.08289318 | 0.01091641 | 3 | 4 | 0.30102999 | 0.76005302 |
| chr3 | 125305163 | 125385138 | 89976  | 1  | 2 | 0 | 0.1575501  | 0          | 2 | 2 | 0.1575501  | 0.93173516 |
| chr3 | 125385138 | 125395197 | 60     | 1  | 3 | 0 | 0.30102999 | 0          | 2 | 3 | 0.08289318 | 0.93173516 |
| chr3 | 125395197 | 125673197 | 278001 | 1  | 2 | 0 | 0.1575501  | 0          | 2 | 2 | 0.1575501  | 0.93173516 |
| chr3 | 125673197 | 125725325 | 52129  | 2  | 3 | 1 | 0.17593012 | 0.00478973 | 3 | 5 | 0.17593012 | 1.02643191 |
| chr3 | 125725325 | 125803478 | 78154  | 2  | 3 | 1 | 0.17593012 | 0.01091641 | 3 | 4 | 0.17593012 | 0.76005302 |
| chr3 | 125803478 | 125831735 | 28558  | 2  | 3 | 2 | 0.17593012 | 0.02162467 | 3 | 5 | 0.17593012 | 0.68214471 |
| chr3 | 125831735 | 125870295 | 38216  | 1  | 2 | 2 | 0.08289318 | 0.02162467 | 3 | 5 | 0.30102999 | 0.68214471 |
| chr3 | 125870295 | 125870354 | 60     | 1  | 3 | 1 | 0.17593012 | 0.02162467 | 3 | 5 | 0.17593012 | 0.68214471 |
| chr3 | 125870354 | 125928441 | 58088  | 2  | 3 | 1 | 0.17593012 | 0.00478973 | 3 | 5 | 0.17593012 | 1.02643191 |
| chr3 | 125928441 | 126005754 | 77314  | 1  | 3 | 1 | 0.30102999 | 0.00478973 | 2 | 5 | 0.08289318 | 1.02643191 |
| chr3 | 126005754 | 126005813 | 60     | 1  | 4 | 1 | 0.47744371 | 0.00478973 | 2 | 5 | 0.429175   | 1.02643191 |
| chr3 | 126005813 | 126116239 | 110427 | 2  | 4 | 1 | 0.47744371 | 0.01091641 | 2 | 4 | 0.429175   | 0.76005302 |
| chr3 | 126116239 | 126221984 | 105746 | 3  | 4 | 0 | 0.47744371 | 0          | 2 | 4 | 0.429175   | 1.26272838 |
| chr3 | 126221984 | 126235791 | 13808  | 2  | 4 | 0 | 0.47744371 | 0          | 2 | 5 | 0.429175   | 1.60515106 |
| chr3 | 126235791 | 126390714 | 154924 | 4  | 3 | 0 | 0.30102999 | 0          | 2 | 5 | 0.08289318 | 1.60515106 |
| chr3 | 126390714 | 126501033 | 110320 | 2  | 3 | 0 | 0.30102999 | 0          | 2 | 4 | 0.08289318 | 1.26272838 |
| chr3 | 126501033 | 126550275 | 49243  | 2  | 3 | 0 | 0.30102999 | 0          | 2 | 5 | 0.08289318 | 1.60515106 |
| chr3 | 126550275 | 126550334 | 60     | 1  | 3 | 0 | 0.30102999 | 0          | 2 | 6 | 0.08289318 | 1.95986592 |
| chr3 | 126550334 | 126587595 | 37262  | 3  | 3 | 0 | 0.30102999 | 0          | 2 | 5 | 0.08289318 | 1.60515106 |
| chr3 | 126587595 | 126633495 | 45901  | 2  | 4 | 0 | 0.30102999 | 0          | 2 | 6 | 0.08289318 | 1.95986592 |
| chr3 | 126633495 | 126714543 | 81049  | 3  | 4 | 0 | 0.47744371 | 0          | 2 | 6 | 0.429175   | 1.95986592 |
| chr3 | 126714543 | 126769875 | 55333  | 2  | 4 | 0 | 0.47744371 | 0          | 2 | 5 | 0.429175   | 1.60515106 |
| chr3 | 126769875 | 126769929 | 55     | 1  | 4 | 1 | 0.47744371 | 0.00204627 | 2 | 6 | 0.429175   | 1.31360226 |
| chr3 | 126769929 | 126835066 | 65138  | 1  | 4 | 1 | 0.47744371 | 0.00478973 | 2 | 5 | 0.429175   | 1.02643191 |
| chr3 | 126835066 | 126896029 | 60964  | 2  | 4 | 1 | 0.47744371 | 0.02162467 | 2 | 5 | 0.429175   | 0.68214471 |
| chr3 | 126896029 | 126922854 | 26826  | 2  | 4 | 2 | 0.47744371 | 0.01053319 | 2 | 6 | 0.429175   | 0.91219088 |
| chr3 | 126922854 | 127002510 | 79657  | 1  | 4 | 2 | 0.47744371 | 0.08289318 | 2 | 3 | 0.429175   | 0.30102999 |
| chr3 | 127002510 | 127033184 | 30675  | 4  | 2 | 2 | 0.30102999 | 0.08289318 | 3 | 3 | 0.10122019 | 0.30102999 |
| chr3 | 127033184 | 127103505 | 70222  | 3  | 4 | 2 | 0.30102999 | 0.02162467 | 3 | 5 | 0.10122019 | 0.68214471 |
| chr3 | 127103505 | 127200388 | 96884  | 2  | 4 | 2 | 0.30102999 | 0.0429175  | 2 | 4 | 0.10122019 | 0.47744371 |
| chr3 | 127200388 | 127243729 | 43342  | 1  | 4 | 2 | 0.47744371 | 0.0429175  | 2 | 4 | 0.429175   | 0.47744371 |
| chr3 | 127243729 | 127243788 | 60     | 1  | 4 | 2 | 0.47744371 | 0.02162467 | 2 | 5 | 0.429175   | 0.68214471 |
| chr3 | 127243788 | 127307734 | 63947  | 2  | 4 | 2 | 0.47744371 | 0.0429175  | 2 | 4 | 0.429175   | 0.47744371 |
| chr3 | 127307734 | 127357611 | 49878  | 5  | 4 | 2 | 0.47744371 | 0.02162467 | 2 | 5 | 0.429175   | 0.68214471 |
| chr3 | 127357611 | 127385658 | 28048  | 2  | 4 | 2 | 0.30102999 | 0.02162467 | 3 | 5 | 0.10122019 | 0.68214471 |
| chr3 | 127385658 | 127439881 | 54224  | 2  | 4 | 2 | 0.47744371 | 0.02162467 | 2 | 5 | 0.429175   | 0.68214471 |
| chr3 | 127439881 | 127476170 | 36290  | 2  | 4 | 2 | 0.30102999 | 0.02162467 | 3 | 5 | 0.10122019 | 0.68214471 |
| chr3 | 127476170 | 127541176 | 65007  | 3  | 4 | 2 | 0.18734596 | 0.02162467 | 4 | 5 | 0.18734596 | 0.68214471 |
| chr3 | 127541176 | 127553380 | 12205  | 1  | 3 | 2 | 0.10122019 | 0.02162467 | 4 | 5 | 0.30102999 | 0.68214471 |
| chr3 | 127553380 | 127588039 | 34660  | 1  | 3 | 2 | 0.17593012 | 0.02162467 | 3 | 5 | 0.17593012 | 0.68214471 |
| chr3 | 127588039 | 127588098 | 60     | 1  | 4 | 2 | 0.30102999 | 0.02162467 | 3 | 5 | 0.10122019 | 0.68214471 |
| chr3 | 127588098 | 127647100 | 59003  | 1  | 3 | 2 | 0.17593012 | 0.02162467 | 3 | 5 | 0.17593012 | 0.68214471 |
| chr3 | 127647100 | 127838206 | 191107 | 5  | 3 | 2 | 0.10122019 | 0.02162467 | 4 | 5 | 0.30102999 | 0.68214471 |
| chr3 | 127838206 | 127838262 | 57     | 1  | 4 | 2 | 0.11390336 | 0.02162467 | 5 | 5 | 0.30102999 | 0.68214471 |
| chr3 | 127838262 | 128016653 | 178302 | 3  | 3 | 2 | 0.17593012 | 0.02162467 | 3 | 5 | 0.17593012 | 0.68214471 |
| chr3 | 128016653 | 128190479 | 182827 | 7  | 4 | 2 | 0.30102999 | 0.02162467 | 3 | 5 | 0.10122019 | 0.68214471 |
| chr3 | 128190479 | 128199538 | 60     | 1  | 4 | 2 | 0.18734596 | 0.01053319 | 2 | 4 | 0.18734596 | 0.91219088 |
| chr3 | 128199538 | 128210258 | 10721  | 1  | 3 | 4 | 0.30102999 | 0.01053319 | 3 | 6 | 0.10122019 | 0.91219088 |
| chr3 | 128210258 | 128267008 | 56751  | 1  | 4 | 2 | 0.30102999 | 0.02162467 | 3 | 5 | 0.10122019 | 0.68214471 |
| chr3 | 128267008 | 128338981 | 71974  | 3  | 4 | 2 | 0.18734596 | 0.02162467 | 4 | 5 | 0.18734596 | 0.68214471 |
| chr3 | 128338981 | 128345649 | 6669   | 1  | 4 | 1 | 0.18734596 | 0.00478973 | 4 | 5 | 0.18734596 | 1.02643191 |
| chr3 | 128345649 | 128400925 | 55277  | 1  | 3 | 1 | 0.10122019 | 0.00478973 | 4 | 5 | 0.30102999 | 1.02643191 |
| chr3 | 128400925 | 128400984 | 60     | 1  | 3 | 2 | 0.10122019 | 0.01053319 | 4 | 6 | 0.30102999 | 0.91219088 |
| chr3 | 128400984 | 128467632 | 66649  | 1  | 3 | 1 | 0.10122019 | 0.00478973 | 4 | 5 | 0.30102999 | 1.02643191 |
| chr3 | 128467632 | 128494359 | 26728  | 2  | 4 | 1 | 0.18734596 | 0.00478973 | 5 | 5 | 0.18734596 | 1.02643191 |
| chr3 | 128494359 | 128494418 | 60     | 1  | 4 | 2 | 0.18734596 | 0.02162467 | 4 | 5 | 0.18734596 | 0.68214471 |
| chr3 | 128494418 | 128627419 | 133002 | 3  | 4 | 1 | 0.18734596 | 0.00478973 | 4 | 5 | 0.18734596 | 1.02643191 |
| chr3 | 128627419 | 128686022 | 58604  | 1  | 4 | 1 | 0.47744371 | 0.00478973 | 2 | 5 | 0.429175   | 1.02643191 |
| chr3 | 128686022 | 128753853 | 67832  | 1  | 3 | 1 | 0.30102999 | 0.00478973 | 5 | 5 | 0.08289318 | 1.02643191 |
| chr3 | 128753853 | 128779848 | 25996  | 3  | 3 | 1 | 0.10122019 | 0.00478973 | 4 | 5 | 0.30102999 | 1.02643191 |
| chr3 | 128779848 | 128926481 | 146634 | 4  | 3 | 1 | 0.10122019 | 0.01091641 | 4 | 4 | 0.30102999 | 0.76005302 |
| chr3 | 128926481 | 128926540 | 60     | 1  | 4 | 1 | 0.10122019 | 0.00478973 | 4 | 5 | 0.30102999 | 1.02643191 |
| chr3 | 128926540 | 129070426 | 143887 | 3  | 3 | 1 | 0.17593012 | 0.00478973 | 3 | 5 | 0.17593012 | 1.02643191 |
| chr3 | 129070426 | 129152947 | 82522  | 2  | 3 | 1 | 0.17593012 | 0.02438896 | 3 | 3 | 0.17593012 | 0.51676182 |
| chr3 | 129152947 | 129504594 | 351648 | 10 | 3 | 1 | 0.17593012 | 0.05404976 | 3 | 2 | 0.17593012 | 0.30102999 |
| chr3 | 129504594 | 129611238 | 106645 | 3  | 3 | 1 | 0.30102999 | 0.05404976 | 3 | 2 | 0.10122019 | 0.30102999 |
| chr3 | 129611238 | 129689840 | 78603  | 1  | 4 | 1 | 0.30102999 | 0.1218695  | 3 | 1 | 0.10122019 | 0.1218695  |
| chr3 | 129689840 | 130003817 | 313978 | 6  | 4 | 1 | 0.11390336 | 0          | 5 | 1 | 0.30102999 | 0.1218695  |
| chr3 | 130003817 | 130088199 | 84383  | 2  | 4 | 1 | 0.11390336 | 0.05404976 | 2 | 3 | 0.30102999 | 0.30102999 |
| chr3 | 130088199 | 130203237 | 11503  |    |   |   |            |            |   |   |            |            |

|      |           |           |        |    |   |   |            |            |    |   |            |            |
|------|-----------|-----------|--------|----|---|---|------------|------------|----|---|------------|------------|
| chr3 | 132036540 | 132087048 | 50509  | 2  | 5 | 1 | 0.12309572 | 0.30102999 | 6  | 0 | 0.30102999 | 0          |
| chr3 | 132087048 | 132278579 | 191532 | 5  | 5 | 1 | 0.07511598 | 0.30102999 | 7  | 0 | 0.43181735 | 0          |
| chr3 | 132278579 | 132319193 | 40615  | 2  | 5 | 1 | 0.04407651 | 0.30102999 | 8  | 0 | 0.58747015 | 0          |
| chr3 | 132319193 | 132319252 | 60     | 1  | 6 | 1 | 0.08122616 | 0.30102999 | 8  | 0 | 0.4250187  | 0          |
| chr3 | 132319252 | 132432055 | 112804 | 4  | 6 | 1 | 0.129913   | 0.30102999 | 7  | 0 | 0.30102999 | 0          |
| chr3 | 132432055 | 132542884 | 110830 | 3  | 6 | 1 | 0.08122616 | 0.30102999 | 8  | 0 | 0.4250187  | 0          |
| chr3 | 132542884 | 132628311 | 85428  | 2  | 6 | 1 | 0.02793176 | 0.30102999 | 10 | 0 | 0.74627054 | 0          |
| chr3 | 132628311 | 132711240 | 82930  | 2  | 7 | 1 | 0.03037338 | 0.30102999 | 11 | 0 | 0.73110763 | 0          |
| chr3 | 132711240 | 132961762 | 250523 | 4  | 7 | 1 | 0.05232577 | 0.30102999 | 10 | 0 | 0.56313462 | 0          |
| chr3 | 132961762 | 133124200 | 162439 | 5  | 7 | 1 | 0.03037338 | 0.30102999 | 11 | 0 | 0.73110763 | 0          |
| chr3 | 133124200 | 133182993 | 58794  | 2  | 6 | 1 | 0.02793176 | 0.30102999 | 10 | 0 | 0.74627054 | 0          |
| chr3 | 133182993 | 133183052 | 60     | 1  | 6 | 1 | 0.01518174 | 0.30102999 | 11 | 0 | 0.9449689  | 0          |
| chr3 | 133183052 | 133305574 | 122523 | 2  | 6 | 1 | 0.02793176 | 0.30102999 | 10 | 0 | 0.74627054 | 0          |
| chr3 | 133305574 | 133306067 | 494    | 2  | 6 | 1 | 0.01518174 | 0.30102999 | 11 | 0 | 0.9449689  | 0          |
| chr3 | 133306067 | 133748256 | 442190 | 16 | 6 | 1 | 0.02793176 | 0.30102999 | 10 | 0 | 0.74627054 | 0          |
| chr3 | 133748256 | 133825556 | 77301  | 1  | 6 | 1 | 0.04875589 | 0.30102999 | 9  | 0 | 0.5732208  | 0          |
| chr3 | 133825556 | 133900325 | 74770  | 2  | 6 | 1 | 0.129913   | 0.30102999 | 7  | 0 | 0.30102999 | 0          |
| chr3 | 133900325 | 133941520 | 41196  | 3  | 6 | 1 | 0.08122616 | 0.30102999 | 8  | 0 | 0.4250187  | 0          |
| chr3 | 133941520 | 134075119 | 133600 | 2  | 6 | 1 | 0.129913   | 0.30102999 | 7  | 0 | 0.30102999 | 0          |
| chr3 | 134075119 | 134120418 | 45298  | 2  | 6 | 1 | 0.20064824 | 0.30102999 | 6  | 0 | 0.20064824 | 0          |
| chr3 | 134120418 | 134120475 | 60     | 1  | 6 | 1 | 0.04875589 | 0.30102999 | 9  | 0 | 0.5732208  | 0          |
| chr3 | 134120475 | 134174021 | 53547  | 1  | 6 | 1 | 0.20064824 | 0.30102999 | 6  | 0 | 0.20064824 | 0          |
| chr3 | 134174021 | 134204702 | 30682  | 2  | 5 | 1 | 0.19510895 | 0.30102999 | 5  | 0 | 0.19510895 | 0          |
| chr3 | 134204702 | 134346680 | 141979 | 3  | 4 | 1 | 0.11390336 | 0.30102999 | 5  | 0 | 0.30102999 | 0          |
| chr3 | 134346680 | 134567381 | 220702 | 3  | 4 | 0 | 0.11390336 | 0          | 5  | 0 | 0.30102999 | 0          |
| chr3 | 134567381 | 134567440 | 60     | 1  | 4 | 0 | 0.11390336 | 0          | 5  | 1 | 0.30102999 | 0.30102999 |
| chr3 | 134567440 | 134636064 | 68625  | 1  | 4 | 0 | 0.18734596 | 0          | 4  | 0 | 0.18734596 | 0          |
| chr3 | 134636064 | 134843569 | 207506 | 4  | 3 | 0 | 0.10122019 | 0          | 4  | 0 | 0.30102999 | 0          |
| chr3 | 134843569 | 135087408 | 243840 | 4  | 3 | 0 | 0.03070643 | 0          | 6  | 0 | 0.63695542 | 0          |
| chr3 | 135087408 | 135470061 | 382654 | 2  | 1 | 0 | 0.01091641 | 0          | 4  | 0 | 0.76005302 | 0          |
| chr3 | 135470061 | 135470120 | 60     | 1  | 2 | 1 | 0.0429175  | 0.1218695  | 4  | 1 | 0.47744371 | 0.1218695  |
| chr3 | 135470120 | 135678138 | 208019 | 1  | 2 | 0 | 0.0429175  | 0          | 4  | 1 | 0.47744371 | 0.30102999 |
| chr3 | 135678138 | 135721189 | 43052  | 2  | 1 | 0 | 0.02162467 | 0          | 5  | 1 | 0.68214471 | 0.30102999 |
| chr3 | 135721189 | 135797226 | 76038  | 3  | 3 | 1 | 0.05670724 | 0.1218695  | 5  | 1 | 0.45545077 | 0.1218695  |
| chr3 | 135797226 | 135797285 | 60     | 1  | 3 | 1 | 0.03070643 | 0.1218695  | 6  | 1 | 0.63695542 | 0.1218695  |
| chr3 | 135797285 | 135904893 | 107609 | 2  | 2 | 0 | 0.01053319 | 0          | 6  | 0 | 0.91219088 | 0          |
| chr3 | 135904893 | 135904952 | 60     | 1  | 2 | 0 | 0.00493743 | 0          | 7  | 0 | 1.16581773 | 0          |
| chr3 | 135904952 | 136240172 | 335221 | 7  | 2 | 0 | 0.01053319 | 0          | 6  | 0 | 0.91219088 | 0          |
| chr3 | 136240172 | 136240231 | 60     | 1  | 2 | 1 | 0.01053319 | 0.30102999 | 6  | 0 | 0.91219088 | 0          |
| chr3 | 136240231 | 136413007 | 172777 | 3  | 2 | 0 | 0.01053319 | 0          | 6  | 0 | 0.91219088 | 0          |
| chr3 | 136413007 | 136451394 | 38388  | 2  | 3 | 1 | 0.03070643 | 0.30102999 | 6  | 0 | 0.63695542 | 0          |
| chr3 | 136451394 | 136713801 | 262408 | 5  | 3 | 0 | 0.03070643 | 0          | 6  | 0 | 0.63695542 | 0          |
| chr3 | 136713801 | 136713860 | 60     | 1  | 3 | 2 | 0.03070643 | 0.30102999 | 6  | 1 | 0.63695542 | 0.05404976 |
| chr3 | 136713860 | 136790987 | 77128  | 1  | 3 | 1 | 0.03070643 | 0.30102999 | 6  | 0 | 0.63695542 | 0          |
| chr3 | 136790987 | 136791046 | 60     | 1  | 3 | 1 | 0.01598258 | 0.30102999 | 7  | 0 | 0.84395715 | 0          |
| chr3 | 136791046 | 137018113 | 227068 | 1  | 3 | 1 | 0.03070643 | 0.30102999 | 6  | 0 | 0.63695542 | 0          |
| chr3 | 137018113 | 137018172 | 60     | 1  | 4 | 1 | 0.03812622 | 0.30102999 | 7  | 0 | 0.60763643 | 0          |
| chr3 | 137018172 | 137208729 | 190558 | 1  | 3 | 1 | 0.01598258 | 0.30102999 | 7  | 0 | 0.84395715 | 0          |
| chr3 | 137208729 | 137208788 | 60     | 1  | 5 | 1 | 0.04407651 | 0.30102999 | 8  | 0 | 0.58747015 | 0          |
| chr3 | 137208788 | 137362614 | 153827 | 1  | 5 | 1 | 0.12309572 | 0.30102999 | 6  | 0 | 0.30102999 | 0          |
| chr3 | 137362614 | 137484278 | 121665 | 2  | 6 | 1 | 0.20064824 | 0.30102999 | 6  | 0 | 0.20064824 | 0          |
| chr3 | 137484278 | 137484323 | 46     | 1  | 7 | 1 | 0.30102999 | 0.30102999 | 6  | 0 | 0.129913   | 0          |
| chr3 | 137484323 | 137567648 | 83326  | 1  | 7 | 0 | 0.30102999 | 0          | 6  | 0 | 0.129913   | 0          |
| chr3 | 137567648 | 137739189 | 171542 | 2  | 6 | 0 | 0.20064824 | 0          | 6  | 0 | 0.20064824 | 0          |
| chr3 | 137739189 | 137811282 | 72094  | 3  | 5 | 0 | 0.129913   | 0          | 7  | 0 | 0.30102999 | 0          |
| chr3 | 137811282 | 137942317 | 131036 | 3  | 6 | 0 | 0.12309572 | 0          | 6  | 0 | 0.30102999 | 0          |
| chr3 | 137942317 | 138027470 | 85154  | 3  | 6 | 1 | 0.20064824 | 0.30102999 | 6  | 0 | 0.20064824 | 0          |
| chr3 | 138027470 | 138043871 | 16402  | 2  | 8 | 1 | 0.30102999 | 0.30102999 | 7  | 0 | 0.13499366 | 0          |
| chr3 | 138043871 | 138116821 | 72951  | 2  | 7 | 0 | 0.20469099 | 0          | 7  | 0 | 0.20469099 | 0          |
| chr3 | 138116821 | 138161861 | 45041  | 3  | 8 | 1 | 0.30102999 | 0.30102999 | 7  | 0 | 0.13499366 | 0          |
| chr3 | 138161861 | 138248190 | 86330  | 2  | 7 | 1 | 0.20469099 | 0.30102999 | 7  | 0 | 0.20469099 | 0          |
| chr3 | 138248190 | 138248249 | 60     | 1  | 8 | 2 | 0.20764654 | 0.61140001 | 8  | 0 | 0.20764654 | 0          |
| chr3 | 138248249 | 138330031 | 81783  | 3  | 8 | 1 | 0.20764654 | 0.30102999 | 8  | 0 | 0.20764654 | 0          |
| chr3 | 138330031 | 138373980 | 43950  | 2  | 7 | 1 | 0.13499366 | 0.30102999 | 8  | 0 | 0.30102999 | 0          |
| chr3 | 138373980 | 138374039 | 60     | 1  | 6 | 0 | 0.20764654 | 0          | 8  | 0 | 0.20764654 | 0          |
| chr3 | 138374039 | 138588678 | 224640 | 3  | 8 | 1 | 0.13499366 | 0.30102999 | 8  | 0 | 0.30102999 | 0          |
| chr3 | 138588678 | 138588737 | 60     | 1  | 8 | 2 | 0.20764654 | 0.61140001 | 8  | 0 | 0.20764654 | 0          |
| chr3 | 138588737 | 138663176 | 64440  | 1  | 8 | 2 | 0.30102999 | 0.61140001 | 7  | 0 | 0.13499366 | 0          |
| chr3 | 138663176 | 138734331 | 71156  | 1  | 7 | 2 | 0.20469099 | 0.61140001 | 7  | 0 | 0.20469099 | 0          |
| chr3 | 138734331 | 138759414 | 25084  | 2  | 7 | 2 | 0.20469099 | 0.30102999 | 7  | 1 | 0.20469099 | 0.05404976 |
| chr3 | 138759414 | 138824857 | 65444  | 1  | 6 | 2 | 0.129913   | 0.61140001 | 7  | 0 | 0.30102999 | 0          |
| chr3 | 138824857 | 138884907 | 60051  | 2  | 6 | 2 | 0.08122616 | 0.61140001 | 8  | 0 | 0.4250187  | 0          |
| chr3 | 138884907 | 138884966 | 60     | 1  | 7 | 2 | 0.13499366 | 0.61140001 | 8  | 0 | 0.30102999 | 0          |
| chr3 | 138884966 | 138955020 | 70055  | 6  | 2 | 2 | 0.129913   | 0.61140001 | 7  | 0 | 0.30102999 | 0          |
| chr3 | 138955020 | 139026985 | 71966  | 2  | 6 | 2 | 0.129913   | 0.30102999 | 7  | 1 | 0.30102999 | 0.05404976 |
| chr3 | 139026985 | 139075748 | 48764  | 1  | 6 | 1 | 0.129913   | 0.30102999 | 7  | 0 | 0.30102999 | 0          |
| chr3 | 139075748 | 139106930 | 31183  | 2  | 7 | 1 | 0.20469099 | 0.30102999 | 7  | 0 | 0.20469099 | 0          |
| chr3 | 139106930 | 139106989 | 60     | 1  | 7 | 1 | 0.20469099 | 0.1218695  | 7  | 1 | 0.20469099 | 0.1218695  |
| chr3 | 139106989 | 139236275 | 192827 | 2  | 6 | 1 | 0.20064824 | 0.30102999 | 6  | 0 | 0.20064824 | 0          |
| chr3 | 139236275 | 139244030 | 7756   | 2  | 8 | 1 | 0.20764654 | 0.30102999 | 8  | 0 | 0.20764654 | 0          |
| chr3 | 139244030 | 139279676 | 35647  | 1  | 5 | 1 | 0.04407651 | 0.30102999 | 8  | 0 | 0.58747015 | 0          |
| chr3 | 139279676 | 139346029 | 66354  | 2  | 4 | 1 | 0.02074938 | 0.30102999 | 8  | 0 | 0.79906872 | 0          |
| chr3 | 139346029 | 139346088 | 60     | 1  | 5 | 1 | 0.04407651 | 0.30102999 | 8  | 0 | 0.58747015 | 0          |
| chr3 | 139346088 | 139517043 | 170956 | 2  | 4 | 1 | 0.02074938 | 0.30102999 | 8  | 0 | 0.79906872 | 0          |
| chr3 | 139517043 | 139517102 | 60     | 1  | 5 | 1 | 0.04407651 | 0.30102999 | 8  | 0 | 0.58747015 | 0          |
| chr3 | 139517102 | 139652108 | 135007 | 1  | 4 | 1 | 0.02074938 | 0.30102999 | 8  | 0 | 0.79906872 | 0          |
| chr3 | 139652108 | 139652167 | 60     | 1  | 4 | 1 | 0.02074938 | 0.05404976 | 8  | 2 | 0.79906872 | 0.30102999 |
| chr3 | 139652167 | 139688200 | 36034  | 1  | 4 | 1 | 0.02074938 | 0.1218695  | 8  | 1 | 0.79906872 | 0.1218695  |
| chr3 | 139688200 | 139773831 | 85632  | 3  | 5 | 1 | 0.04407651 | 0.1218695  | 8  | 1 | 0.58747015 | 0.1218695  |
| chr3 | 139773831 | 139894784 | 120954 | 4  | 6 | 1 | 0.08122616 | 0.1218695  | 8  | 1 | 0.4250187  | 0.1218695  |
| chr3 | 139894784 | 139950208 | 55425  | 2  | 7 | 1 | 0.13499366 | 0.1218695  | 8  | 1 | 0.30102999 | 0.1218695  |
| chr3 | 139950208 | 140185431 | 235224 | 4  | 6 | 1 | 0.08122616 | 0.30102999 | 8  | 0 | 0.4250187  | 0          |
| chr3 | 140185431 | 140185482 | 52     | 1  | 7 | 1 | 0.13499366 | 0.30102999 | 8  | 0 | 0.30102999 | 0          |
| chr3 | 140185482 | 140331909 | 146428 | 3  | 6 | 1 | 0.08122616 | 0.30102999 | 8  | 0 | 0.4250187  | 0          |
| chr3 | 140331909 | 140402569 | 70661  | 2  | 7 | 1 | 0.13499366 | 0.30102999 | 8  | 0 | 0.30102999 | 0          |
| chr3 | 140       |           |        |    |   |   |            |            |    |   |            |            |

|      |           |           |        |    |    |   |            |            |    |   |            |            |
|------|-----------|-----------|--------|----|----|---|------------|------------|----|---|------------|------------|
| chr3 | 142442647 | 142512674 | 70028  | 2  | 6  | 2 | 0.02793176 | 0.61140001 | 10 | 0 | 0.74627054 | 0          |
| chr3 | 142512674 | 142512733 | 60     | 1  | 6  | 2 | 0.02793176 | 0.30102999 | 10 | 1 | 0.74627054 | 0.05404976 |
| chr3 | 142512733 | 142577172 | 64440  | 2  | 6  | 2 | 0.02793176 | 0.61140001 | 10 | 0 | 0.74627054 | 0          |
| chr3 | 142577172 | 142723924 | 146753 | 4  | 6  | 2 | 0.01518174 | 0.61140001 | 11 | 0 | 0.9449689  | 0          |
| chr3 | 142723924 | 142723983 | 60     | 1  | 8  | 2 | 0.05490675 | 0.61140001 | 11 | 0 | 0.55623409 | 0          |
| chr3 | 142723983 | 142779437 | 55455  | 1  | 7  | 2 | 0.03037338 | 0.61140001 | 11 | 0 | 0.73110763 | 0          |
| chr3 | 142779437 | 142894708 | 115272 | 2  | 6  | 2 | 0.01518174 | 0.61140001 | 11 | 0 | 0.9449689  | 0          |
| chr3 | 142894708 | 142984456 | 89749  | 2  | 5  | 2 | 0.00666883 | 0.61140001 | 11 | 0 | 1.20557689 | 0          |
| chr3 | 142984456 | 143156586 | 172131 | 3  | 4  | 2 | 0.02074938 | 0.61140001 | 8  | 0 | 0.79906872 | 0          |
| chr3 | 143156586 | 143156645 | 60     | 1  | 5  | 2 | 0.04407651 | 0.61140001 | 8  | 0 | 0.58747015 | 0          |
| chr3 | 143156645 | 143212526 | 55882  | 1  | 5  | 2 | 0.12309572 | 0.61140001 | 6  | 0 | 0.30102999 | 0          |
| chr3 | 143212526 | 143271117 | 58592  | 1  | 5  | 2 | 0.19510895 | 0.61140001 | 5  | 0 | 0.19510895 | 0          |
| chr3 | 143271117 | 143271176 | 60     | 1  | 5  | 2 | 0.04407651 | 0.61140001 | 8  | 0 | 0.58747015 | 0          |
| chr3 | 143271176 | 143337628 | 66453  | 1  | 5  | 1 | 0.04407651 | 0.30102999 | 8  | 0 | 0.58747015 | 0          |
| chr3 | 143337628 | 143375800 | 38173  | 1  | 4  | 1 | 0.06713722 | 0.30102999 | 6  | 0 | 0.44141547 | 0          |
| chr3 | 143375800 | 143498841 | 123042 | 4  | 4  | 1 | 0.06713722 | 0.1218695  | 6  | 1 | 0.44141547 | 0.1218695  |
| chr3 | 143498841 | 143722633 | 223793 | 5  | 4  | 1 | 0.06713722 | 0.30102999 | 6  | 0 | 0.44141547 | 0          |
| chr3 | 143722633 | 144065039 | 342407 | 3  | 4  | 0 | 0.06713722 | 0          | 6  | 0 | 0.44141547 | 0          |
| chr3 | 144065039 | 144065098 | 60     | 1  | 4  | 0 | 0.06713722 | 0          | 7  | 0 | 0.60763643 | 0          |
| chr3 | 144065098 | 144163463 | 98366  | 2  | 2  | 0 | 0.01053319 | 0          | 6  | 0 | 0.91219088 | 0          |
| chr3 | 144163463 | 144344443 | 180981 | 1  | 2  | 0 | 0.0429175  | 0          | 4  | 0 | 0.47744371 | 0          |
| chr3 | 144344443 | 145050142 | 705700 | 4  | 2  | 0 | 0.08289318 | 0          | 3  | 0 | 0.30102999 | 0          |
| chr3 | 145050142 | 145050201 | 60     | 1  | 3  | 1 | 0.10122019 | 0.30102999 | 4  | 0 | 0.30102999 | 0          |
| chr3 | 145050201 | 145399406 | 349206 | 2  | 3  | 0 | 0.17593012 | 0          | 3  | 0 | 0.17593012 | 0          |
| chr3 | 145399406 | 145519243 | 119838 | 2  | 4  | 1 | 0.06713722 | 0.30102999 | 6  | 0 | 0.44141547 | 0          |
| chr3 | 145519243 | 145783995 | 264753 | 2  | 3  | 0 | 0.03070643 | 0          | 6  | 0 | 0.63695542 | 0          |
| chr3 | 145783995 | 145784054 | 60     | 1  | 4  | 1 | 0.03812622 | 0.30102999 | 7  | 0 | 0.60763643 | 0          |
| chr3 | 145784054 | 145938580 | 154527 | 3  | 3  | 1 | 0.05670724 | 0.30102999 | 5  | 0 | 0.45545077 | 0          |
| chr3 | 145938580 | 145980330 | 41751  | 3  | 4  | 1 | 0.11390336 | 0.30102999 | 5  | 0 | 0.30102999 | 0          |
| chr3 | 145980330 | 146064060 | 83731  | 1  | 4  | 1 | 0.18734596 | 0.30102999 | 4  | 0 | 0.18734596 | 0          |
| chr3 | 146064060 | 146151230 | 87171  | 2  | 5  | 1 | 0.19510895 | 0.30102999 | 5  | 0 | 0.19510895 | 0          |
| chr3 | 146151230 | 146151289 | 60     | 1  | 6  | 1 | 0.129913   | 0.30102999 | 7  | 0 | 0.30102999 | 0          |
| chr3 | 146151289 | 146213605 | 62317  | 1  | 5  | 1 | 0.19510895 | 0.30102999 | 5  | 0 | 0.19510895 | 0          |
| chr3 | 146213605 | 146246235 | 32631  | 1  | 5  | 0 | 0.19510895 | 0          | 5  | 0 | 0.19510895 | 0          |
| chr3 | 146246235 | 146323213 | 76979  | 4  | 6  | 0 | 0.129913   | 0          | 7  | 0 | 0.30102999 | 0          |
| chr3 | 146323213 | 146619160 | 295948 | 2  | 6  | 0 | 0.20064824 | 0          | 6  | 0 | 0.20064824 | 0          |
| chr3 | 146619160 | 146760112 | 140953 | 3  | 6  | 0 | 0.04875589 | 0          | 9  | 0 | 0.5732208  | 0          |
| chr3 | 146760112 | 146958826 | 198715 | 1  | 6  | 0 | 0.129913   | 0          | 7  | 0 | 0.30102999 | 0          |
| chr3 | 146958826 | 146958885 | 60     | 1  | 6  | 0 | 0.129913   | 0          | 7  | 1 | 0.30102999 | 0.30102999 |
| chr3 | 146958885 | 147041039 | 82155  | 1  | 6  | 0 | 0.20064824 | 0          | 6  | 1 | 0.20064824 | 0.30102999 |
| chr3 | 147041039 | 147130658 | 89620  | 3  | 4  | 0 | 0.11390336 | 0          | 5  | 1 | 0.30102999 | 0.30102999 |
| chr3 | 147130658 | 147130717 | 60     | 1  | 6  | 0 | 0.20064824 | 0          | 6  | 1 | 0.20064824 | 0.30102999 |
| chr3 | 147130717 | 147219530 | 88814  | 1  | 5  | 0 | 0.12309572 | 0          | 6  | 1 | 0.30102999 | 0.30102999 |
| chr3 | 147219530 | 147370868 | 151339 | 1  | 5  | 0 | 0.19510895 | 0          | 5  | 1 | 0.19510895 | 0.30102999 |
| chr3 | 147370868 | 147370927 | 60     | 1  | 5  | 0 | 0.12309572 | 0          | 6  | 1 | 0.30102999 | 0.30102999 |
| chr3 | 147370927 | 147514205 | 143279 | 1  | 5  | 0 | 0.19510895 | 0          | 5  | 1 | 0.19510895 | 0.30102999 |
| chr3 | 147514205 | 147514264 | 60     | 1  | 5  | 0 | 0.12309572 | 0          | 6  | 1 | 0.30102999 | 0.30102999 |
| chr3 | 147514264 | 147625502 | 111239 | 1  | 4  | 0 | 0.06713722 | 0          | 6  | 0 | 0.44141547 | 0          |
| chr3 | 147625502 | 147719481 | 93980  | 2  | 5  | 0 | 0.12309572 | 0          | 6  | 1 | 0.30102999 | 0.30102999 |
| chr3 | 147719481 | 147719540 | 60     | 1  | 6  | 1 | 0.129913   | 0.1218695  | 7  | 1 | 0.30102999 | 0.1218695  |
| chr3 | 147719540 | 147857159 | 137620 | 1  | 6  | 0 | 0.129913   | 0          | 7  | 0 | 0.30102999 | 0          |
| chr3 | 147857159 | 147857218 | 60     | 1  | 8  | 0 | 0.13872638 | 0          | 9  | 1 | 0.30102999 | 0.30102999 |
| chr3 | 147857218 | 147963917 | 106700 | 2  | 7  | 0 | 0.08584816 | 0          | 9  | 1 | 0.42015402 | 0.30102999 |
| chr3 | 147963917 | 147963976 | 60     | 1  | 8  | 0 | 0.13872638 | 0          | 9  | 2 | 0.30102999 | 0.61140001 |
| chr3 | 147963976 | 148118658 | 154683 | 1  | 8  | 0 | 0.13872638 | 0          | 9  | 1 | 0.30102999 | 0.30102999 |
| chr3 | 148118658 | 148118717 | 60     | 1  | 9  | 0 | 0.09154957 | 0          | 11 | 1 | 0.41444892 | 0.30102999 |
| chr3 | 148118717 | 148247003 | 128287 | 1  | 8  | 0 | 0.05490675 | 0          | 11 | 1 | 0.55623409 | 0.30102999 |
| chr3 | 148247003 | 148425748 | 178746 | 2  | 8  | 0 | 0.05490675 | 0          | 11 | 0 | 0.55623409 | 0          |
| chr3 | 148425748 | 148491324 | 65577  | 3  | 9  | 0 | 0.09154957 | 0          | 11 | 0 | 0.41444892 | 0          |
| chr3 | 148491324 | 148577961 | 86638  | 4  | 10 | 0 | 0.14303407 | 0          | 11 | 0 | 0.30102999 | 0          |
| chr3 | 148577961 | 148965690 | 387730 | 14 | 9  | 0 | 0.09154957 | 0          | 11 | 0 | 0.41444892 | 0          |
| chr3 | 148965690 | 149211013 | 245324 | 6  | 10 | 0 | 0.14303407 | 0          | 11 | 0 | 0.30102999 | 0          |
| chr3 | 149211013 | 149307704 | 96692  | 4  | 11 | 0 | 0.21200206 | 0          | 11 | 0 | 0.21200206 | 0          |
| chr3 | 149307704 | 149368351 | 60648  | 2  | 11 | 1 | 0.14385241 | 0.30102999 | 12 | 0 | 0.30102999 | 0          |
| chr3 | 149368351 | 149414576 | 46226  | 2  | 11 | 0 | 0.14385241 | 0          | 12 | 0 | 0.30102999 | 0          |
| chr3 | 149414576 | 149458747 | 44172  | 2  | 12 | 0 | 0.21227046 | 0          | 12 | 0 | 0.21227046 | 0          |
| chr3 | 149458747 | 149458806 | 60     | 1  | 12 | 0 | 0.14385241 | 0          | 13 | 0 | 0.30102999 | 0          |
| chr3 | 149458806 | 149514722 | 55917  | 2  | 12 | 0 | 0.21227046 | 0          | 12 | 0 | 0.21227046 | 0          |
| chr3 | 149514722 | 149589811 | 75090  | 1  | 12 | 0 | 0.30102999 | 0          | 11 | 0 | 0.14385241 | 0          |
| chr3 | 149589811 | 149749169 | 159259 | 5  | 13 | 0 | 0.21200206 | 0          | 13 | 0 | 0.21200206 | 0          |
| chr3 | 149749169 | 149961703 | 212535 | 2  | 13 | 0 | 0.41271556 | 0          | 11 | 0 | 0.09334429 | 0          |
| chr3 | 149961703 | 149961762 | 60     | 1  | 13 | 1 | 0.41271556 | 0.30102999 | 11 | 0 | 0.09334429 | 0          |
| chr3 | 149961762 | 150156002 | 194241 | 2  | 12 | 1 | 0.41314172 | 0.30102999 | 10 | 0 | 0.09290028 | 0          |
| chr3 | 150156002 | 150156059 | 58     | 1  | 12 | 1 | 0.21227046 | 0.1218695  | 12 | 1 | 0.21227046 | 0.1218695  |
| chr3 | 150156059 | 150177694 | 21636  | 2  | 12 | 1 | 0.30102999 | 0.1218695  | 11 | 1 | 0.14385241 | 0.1218695  |
| chr3 | 150177694 | 150293480 | 115787 | 4  | 12 | 1 | 0.30102999 | 0.05404976 | 11 | 2 | 0.14385241 | 0.30102999 |
| chr3 | 150293480 | 150461964 | 168485 | 5  | 12 | 1 | 0.41314172 | 0.05404976 | 10 | 2 | 0.09290028 | 0.30102999 |
| chr3 | 150461964 | 150587537 | 125574 | 2  | 11 | 1 | 0.30102999 | 0.1218695  | 10 | 1 | 0.14303407 | 0.1218695  |
| chr3 | 150587537 | 150622480 | 34944  | 2  | 11 | 1 | 0.21200206 | 0.1218695  | 11 | 1 | 0.21200206 | 0.1218695  |
| chr3 | 150622480 | 150651767 | 29288  | 3  | 12 | 1 | 0.30102999 | 0.1218695  | 11 | 1 | 0.14385241 | 0.1218695  |
| chr3 | 150651767 | 150690789 | 39023  | 1  | 12 | 1 | 0.41314172 | 0.1218695  | 10 | 1 | 0.09290028 | 0.1218695  |
| chr3 | 150690789 | 150769222 | 78434  | 1  | 12 | 1 | 0.41314172 | 0.30102999 | 10 | 0 | 0.09290028 | 0          |
| chr3 | 150769222 | 150983589 | 214368 | 8  | 12 | 1 | 0.30102999 | 0.30102999 | 11 | 0 | 0.14385241 | 0          |
| chr3 | 150983589 | 151156344 | 172756 | 10 | 12 | 1 | 0.30102999 | 0.1218695  | 11 | 1 | 0.14385241 | 0.1218695  |
| chr3 | 151156344 | 151167962 | 11619  | 1  | 11 | 1 | 0.21200206 | 0.1218695  | 11 | 1 | 0.21200206 | 0.1218695  |
| chr3 | 151167962 | 151287291 | 119330 | 1  | 10 | 0 | 0.14303407 | 0          | 11 | 1 | 0.30102999 | 0.30102999 |
| chr3 | 151287291 | 151441231 | 153941 | 3  | 11 | 0 | 0.21200206 | 0          | 11 | 1 | 0.21200206 | 0.30102999 |
| chr3 | 151441231 | 151531699 | 90469  | 1  | 11 | 0 | 0.21200206 | 0          | 11 | 0 | 0.21200206 | 0          |
| chr3 | 151531699 | 151599643 | 67945  | 4  | 12 | 0 | 0.30102999 | 0          | 11 | 0 | 0.14385241 | 0          |
| chr3 | 151599643 | 151970271 | 370629 | 2  | 10 | 0 | 0.14303407 | 0          | 11 | 0 | 0.30102999 | 0          |
| chr3 | 151970271 | 151970330 | 60     | 1  | 11 | 0 | 0.21200206 | 0          | 11 | 0 | 0.21200206 | 0          |
| chr3 | 151970330 | 152016859 | 46530  | 1  | 10 | 0 | 0.14303407 | 0          | 11 | 0 | 0.30102999 | 0          |
| chr3 | 152016859 | 152101637 | 84779  | 2  | 8  | 0 | 0.20764654 | 0          | 8  | 0 | 0.20764654 | 0          |
| chr3 | 152101637 | 152101696 | 60     | 1  | 8  | 0 | 0.13872638 | 0          | 9  | 0 | 0.30102999 | 0          |
| chr3 | 152101696 | 152309548 | 207853 | 3  | 6  | 0 | 0.129913   | 0          | 7  | 0 | 0.30102999 | 0          |
| chr3 | 152309548 | 152424263 | 114716 | 2  | 8  | 0 | 0.30102999 | 0          |    |   |            |            |



|      |           |           |        |   |    |   |            |           |    |   |            |            |
|------|-----------|-----------|--------|---|----|---|------------|-----------|----|---|------------|------------|
| chr3 | 156500239 | 156543647 | 43409  | 1 | 12 | 0 | 0.55190077 | 0         | 9  | 0 | 0.0565833  | 0          |
| chr3 | 156543647 | 156606494 | 62848  | 1 | 11 | 0 | 0.41444882 | 0         | 9  | 0 | 0.09154957 | 0          |
| chr3 | 156606494 | 156712591 | 106098 | 3 | 11 | 0 | 0.30102999 | 0         | 10 | 0 | 0.14303407 | 0          |
| chr3 | 156712591 | 156712650 | 60     | 1 | 12 | 0 | 0.30102999 | 0         | 11 | 0 | 0.14385241 | 0          |
| chr3 | 156712650 | 156869731 | 157082 | 3 | 11 | 0 | 0.21200206 | 0         | 11 | 0 | 0.21200206 | 0          |
| chr3 | 156869731 | 156932441 | 62711  | 1 | 11 | 0 | 0.30102999 | 0         | 10 | 0 | 0.14303407 | 0          |
| chr3 | 156932441 | 157082218 | 149778 | 4 | 12 | 0 | 0.41314172 | 0         | 10 | 0 | 0.09290028 | 0          |
| chr3 | 157082218 | 157311107 | 228890 | 5 | 11 | 0 | 0.30102999 | 0         | 10 | 0 | 0.14303407 | 0          |
| chr3 | 157311107 | 157311166 | 60     | 1 | 12 | 0 | 0.41314172 | 0         | 10 | 0 | 0.09290028 | 0          |
| chr3 | 157311166 | 157649680 | 338515 | 3 | 11 | 0 | 0.30102999 | 0         | 10 | 0 | 0.14303407 | 0          |
| chr3 | 157649680 | 157649739 | 60     | 1 | 11 | 0 | 0.21200206 | 0         | 11 | 0 | 0.21200206 | 0          |
| chr3 | 157649739 | 157716637 | 66899  | 1 | 11 | 0 | 0.30102999 | 0         | 10 | 0 | 0.14303407 | 0          |
| chr3 | 157716637 | 157839904 | 123268 | 2 | 10 | 0 | 0.21118145 | 0         | 10 | 0 | 0.21118145 | 0          |
| chr3 | 157839904 | 158210336 | 370433 | 9 | 10 | 0 | 0.14303407 | 0         | 11 | 0 | 0.30102999 | 0          |
| chr3 | 158210336 | 158272621 | 62286  | 1 | 10 | 0 | 0.21118145 | 0         | 10 | 0 | 0.21118145 | 0          |
| chr3 | 158272621 | 158272680 | 60     | 1 | 10 | 0 | 0.14303407 | 0         | 11 | 0 | 0.30102999 | 0          |
| chr3 | 158272680 | 158414913 | 142234 | 7 | 10 | 0 | 0.21118145 | 0         | 10 | 0 | 0.21118145 | 0          |
| chr3 | 158414913 | 158546836 | 131924 | 6 | 11 | 0 | 0.21200206 | 0         | 11 | 0 | 0.21200206 | 0          |
| chr3 | 158546836 | 158730176 | 183344 | 1 | 11 | 0 | 0.30102999 | 0         | 10 | 0 | 0.14303407 | 0          |
| chr3 | 158730176 | 158786919 | 56744  | 2 | 11 | 0 | 0.21200206 | 0         | 11 | 0 | 0.21200206 | 0          |
| chr3 | 158786919 | 158786978 | 60     | 1 | 12 | 0 | 0.14385241 | 0         | 13 | 0 | 0.30102999 | 0          |
| chr3 | 158786978 | 158955242 | 168265 | 4 | 11 | 0 | 0.21200206 | 0         | 11 | 0 | 0.21200206 | 0          |
| chr3 | 158955242 | 159012665 | 57424  | 3 | 12 | 0 | 0.30102999 | 0         | 11 | 0 | 0.14385241 | 0          |
| chr3 | 159012665 | 159164049 | 151385 | 3 | 11 | 0 | 0.21200206 | 0         | 11 | 0 | 0.21200206 | 0          |
| chr3 | 159164049 | 159198524 | 34476  | 2 | 11 | 0 | 0.14385241 | 0         | 12 | 0 | 0.30102999 | 0          |
| chr3 | 159198524 | 159280043 | 81520  | 2 | 11 | 0 | 0.21200206 | 0         | 11 | 0 | 0.21200206 | 0          |
| chr3 | 159280043 | 159328038 | 47996  | 1 | 11 | 0 | 0.30102999 | 0         | 10 | 0 | 0.14303407 | 0          |
| chr3 | 159328038 | 159477095 | 149058 | 4 | 11 | 0 | 0.21200206 | 0         | 11 | 0 | 0.21200206 | 0          |
| chr3 | 159477095 | 159662649 | 185555 | 5 | 12 | 0 | 0.30102999 | 0         | 11 | 0 | 0.14385241 | 0          |
| chr3 | 159662649 | 159849796 | 187148 | 5 | 12 | 0 | 0.21227046 | 0         | 12 | 0 | 0.21227046 | 0          |
| chr3 | 159849796 | 159849494 | 135154 | 2 | 11 | 0 | 0.14385241 | 0         | 12 | 0 | 0.30102999 | 0          |
| chr3 | 159849494 | 159985008 | 60     | 1 | 11 | 0 | 0.09334429 | 0         | 13 | 0 | 0.41271556 | 0          |
| chr3 | 159985008 | 160085301 | 100294 | 2 | 11 | 0 | 0.14385241 | 0         | 12 | 0 | 0.30102999 | 0          |
| chr3 | 160085301 | 160279160 | 193860 | 7 | 11 | 0 | 0.21200206 | 0         | 11 | 0 | 0.21200206 | 0          |
| chr3 | 160279160 | 160279219 | 60     | 1 | 11 | 0 | 0.14385241 | 0         | 12 | 0 | 0.30102999 | 0          |
| chr3 | 160279219 | 160679651 | 400433 | 7 | 11 | 0 | 0.21200206 | 0         | 11 | 0 | 0.21200206 | 0          |
| chr3 | 160679651 | 160679710 | 60     | 1 | 11 | 0 | 0.14385241 | 0         | 12 | 0 | 0.30102999 | 0          |
| chr3 | 160679710 | 161075157 | 395448 | 7 | 11 | 0 | 0.21200206 | 0         | 11 | 0 | 0.21200206 | 0          |
| chr3 | 161075157 | 161123418 | 48262  | 1 | 11 | 0 | 0.55623409 | 0         | 8  | 0 | 0.05490675 | 0          |
| chr3 | 161123418 | 161216835 | 93418  | 2 | 9  | 0 | 0.30102999 | 0         | 8  | 0 | 0.13872638 | 0          |
| chr3 | 161216835 | 161537949 | 321115 | 2 | 8  | 0 | 0.20764654 | 0         | 8  | 0 | 0.20764654 | 0          |
| chr3 | 161537949 | 161903614 | 365666 | 2 | 7  | 0 | 0.13499366 | 0         | 8  | 0 | 0.30102999 | 0          |
| chr3 | 161903614 | 162262697 | 359084 | 2 | 3  | 0 | 0.05670724 | 0         | 5  | 0 | 0.45545077 | 0          |
| chr3 | 162262697 | 162262756 | 60     | 1 | 3  | 0 | 0.03070643 | 0         | 6  | 0 | 0.63695542 | 0          |
| chr3 | 162262756 | 162725478 | 462723 | 4 | 3  | 0 | 0.05670724 | 0         | 5  | 0 | 0.45545077 | 0          |
| chr3 | 162725478 | 162725537 | 60     | 1 | 5  | 0 | 0.12309572 | 0         | 6  | 0 | 0.30102999 | 0          |
| chr3 | 162725537 | 162928148 | 202612 | 2 | 5  | 0 | 0.19510895 | 0         | 5  | 0 | 0.19510895 | 0          |
| chr3 | 162928148 | 162928207 | 60     | 1 | 5  | 0 | 0.12309572 | 0         | 6  | 0 | 0.30102999 | 0          |
| chr3 | 162928207 | 163133456 | 205250 | 2 | 5  | 0 | 0.19510895 | 0         | 5  | 0 | 0.19510895 | 0          |
| chr3 | 163133456 | 163482098 | 348643 | 5 | 6  | 0 | 0.30102999 | 0         | 5  | 0 | 0.12309572 | 0          |
| chr3 | 163482098 | 163532726 | 50629  | 1 | 5  | 0 | 0.19510895 | 0         | 5  | 0 | 0.19510895 | 0          |
| chr3 | 163532726 | 163643791 | 111066 | 1 | 5  | 0 | 0.30102999 | 0         | 4  | 0 | 0.11390336 | 0          |
| chr3 | 163643791 | 163643850 | 60     | 1 | 6  | 0 | 0.44141547 | 0         | 4  | 0 | 0.06713722 | 0          |
| chr3 | 163643850 | 163768664 | 124815 | 2 | 5  | 0 | 0.30102999 | 0         | 4  | 0 | 0.11390336 | 0          |
| chr3 | 163768664 | 163926377 | 157714 | 4 | 5  | 0 | 0.19510895 | 0         | 5  | 0 | 0.19510895 | 0          |
| chr3 | 163926377 | 163926436 | 60     | 1 | 6  | 0 | 0.30102999 | 0         | 5  | 0 | 0.12309572 | 0          |
| chr3 | 163926436 | 164370152 | 443717 | 6 | 5  | 0 | 0.30102999 | 0         | 4  | 0 | 0.11390336 | 0          |
| chr3 | 164370152 | 164370211 | 60     | 1 | 5  | 0 | 0.19510895 | 0         | 5  | 0 | 0.19510895 | 0          |
| chr3 | 164370211 | 164569733 | 199523 | 1 | 5  | 0 | 0.30102999 | 0         | 4  | 0 | 0.11390336 | 0          |
| chr3 | 164569733 | 164569792 | 60     | 1 | 6  | 0 | 0.44141547 | 0         | 4  | 1 | 0.06713722 | 0.30102999 |
| chr3 | 164569792 | 164710200 | 140409 | 1 | 6  | 0 | 0.44141547 | 0         | 4  | 0 | 0.06713722 | 0          |
| chr3 | 164710200 | 164863594 | 153395 | 3 | 5  | 0 | 0.30102999 | 0         | 4  | 0 | 0.11390336 | 0          |
| chr3 | 164863594 | 164912215 | 48622  | 2 | 6  | 0 | 0.44141547 | 0         | 4  | 0 | 0.06713722 | 0          |
| chr3 | 164912215 | 165013751 | 101537 | 2 | 7  | 0 | 0.60763643 | 0         | 4  | 0 | 0.03812622 | 0          |
| chr3 | 165013751 | 165013810 | 60     | 1 | 7  | 0 | 0.60763643 | 0         | 4  | 1 | 0.03812622 | 0.30102999 |
| chr3 | 165013810 | 165119698 | 105799 | 1 | 5  | 0 | 0.45545077 | 0         | 3  | 1 | 0.05670724 | 0.30102999 |
| chr3 | 165119698 | 165385037 | 265430 | 2 | 5  | 0 | 0.45545077 | 0         | 3  | 0 | 0.05670724 | 0          |
| chr3 | 165385037 | 165655987 | 270951 | 4 | 6  | 0 | 0.63695542 | 0         | 3  | 0 | 0.30706743 | 0          |
| chr3 | 165655987 | 165806091 | 150105 | 2 | 6  | 0 | 0.44141547 | 0         | 4  | 0 | 0.06713722 | 0          |
| chr3 | 165806091 | 165806150 | 60     | 1 | 7  | 0 | 0.30102999 | 0         | 6  | 0 | 0.129913   | 0          |
| chr3 | 165806150 | 165891343 | 85194  | 1 | 5  | 0 | 0.30102999 | 0         | 4  | 0 | 0.11390336 | 0          |
| chr3 | 165891343 | 166121899 | 230557 | 2 | 4  | 0 | 0.30102999 | 0         | 3  | 0 | 0.10122019 | 0          |
| chr3 | 166121899 | 166121958 | 60     | 1 | 9  | 0 | 0.42015402 | 0         | 7  | 0 | 0.08584816 | 0          |
| chr3 | 166121958 | 166269102 | 147145 | 6 | 0  | 0 | 0.129913   | 0         | 7  | 0 | 0.30102999 | 0          |
| chr3 | 166269102 | 166269161 | 60     | 1 | 7  | 0 | 0.20469099 | 0         | 7  | 1 | 0.20469099 | 0.30102999 |
| chr3 | 166269161 | 166471358 | 202198 | 1 | 6  | 0 | 0.20064824 | 0         | 6  | 1 | 0.20064824 | 0.30102999 |
| chr3 | 166471358 | 166527551 | 56194  | 2 | 7  | 0 | 0.20469099 | 0         | 7  | 1 | 0.20469099 | 0.30102999 |
| chr3 | 166527551 | 166659726 | 132176 | 1 | 7  | 0 | 0.30102999 | 0         | 6  | 1 | 0.129913   | 0.30102999 |
| chr3 | 166659726 | 166918267 | 258542 | 3 | 7  | 0 | 0.20469099 | 0         | 7  | 1 | 0.20469099 | 0.30102999 |
| chr3 | 166918267 | 166918326 | 60     | 1 | 7  | 1 | 0.20469099 | 0.1218695 | 7  | 1 | 0.20469099 | 0.1218695  |
| chr3 | 166918326 | 167090692 | 172367 | 4 | 7  | 0 | 0.20469099 | 0         | 7  | 1 | 0.20469099 | 0.30102999 |
| chr3 | 167090692 | 167159761 | 69070  | 2 | 6  | 0 | 0.129913   | 0         | 7  | 1 | 0.30102999 | 0.30102999 |
| chr3 | 167159761 | 167189506 | 29746  | 6 | 1  | 0 | 0.129913   | 0.1218695 | 7  | 1 | 0.30102999 | 0.1218695  |
| chr3 | 167189506 | 167287982 | 98477  | 2 | 6  | 0 | 0.129913   | 0         | 7  | 1 | 0.30102999 | 0.30102999 |
| chr3 | 167287982 | 167371614 | 83633  | 3 | 7  | 0 | 0.20469099 | 0         | 7  | 1 | 0.20469099 | 0.30102999 |
| chr3 | 167371614 | 167540761 | 169148 | 7 | 9  | 0 | 0.42015402 | 0         | 7  | 1 | 0.08584816 | 0.30102999 |
| chr3 | 167540761 | 167776506 | 235746 | 4 | 9  | 1 | 0.42015402 | 0.1218695 | 7  | 1 | 0.08584816 | 0.1218695  |
| chr3 | 167776506 | 167837277 | 60772  | 2 | 9  | 1 | 0.30102999 | 0.1218695 | 8  | 1 | 0.13872638 | 0.1218695  |
| chr3 | 167837277 | 167837336 | 60     | 1 | 11 | 1 | 0.41444882 | 0.1218695 | 9  | 1 | 0.09154957 | 0.1218695  |
| chr3 | 167837336 | 167978166 | 140831 | 1 | 11 | 0 | 0.41444882 | 0         | 9  | 1 | 0.09154957 | 0.30102999 |
| chr3 | 167978166 | 167978225 | 60     | 1 | 12 | 0 | 0.30102999 | 0         | 11 | 1 | 0.14385241 | 0.30102999 |
| chr3 | 167978225 | 168219616 | 241392 | 2 | 12 | 0 | 0.41314172 | 0         | 10 | 1 | 0.09290028 | 0.30102999 |
| chr3 | 168219616 | 168274402 | 54787  | 2 | 12 | 0 | 0.41314172 | 0         | 10 | 0 | 0.09290028 | 0          |
| chr3 | 168274402 | 168347450 | 73049  | 2 | 12 | 0 | 0.41314172 | 0         | 10 | 1 | 0.09290028 | 0.30102999 |
| chr3 | 168347450 | 168429212 | 81763  | 1 | 12 | 0 | 0.41314172 | 0         | 10 | 0 | 0.09290028 | 0          |
| chr3 | 168429212 | 168524592 | 95381  | 1 | 11 | 0 | 0.30102999 | 0         | 10 | 0 | 0.14303407 | 0          |
| chr3 | 168524592 | 168802607 | 278016 | 4 | 11 | 0 | 0.21200206 | 0         | 11 | 1 | 0.21200206 | 0.30102999 |
| chr3 | 168802607 | 168824043 | 21437  | 2 | 12 | 0 | 0.30102999 | 0         | 11 | 1 | 0.14385241 | 0.30102999 |
| chr3 | 168824043 | 169195165 | 371123 | 9 | 11 | 0 | 0.2120     |           |    |   |            |            |

|      |           |           |        |   |    |   |            |            |    |   |            |            |
|------|-----------|-----------|--------|---|----|---|------------|------------|----|---|------------|------------|
| chr3 | 171806594 | 171806653 | 60     | 1 | 13 | 0 | 0.41271556 | 0          | 11 | 0 | 0.09334429 | 0          |
| chr3 | 171806653 | 171904548 | 97896  | 3 | 13 | 0 | 0.5498098  | 0          | 10 | 0 | 0.0574087  | 0          |
| chr3 | 171904548 | 171904607 | 60     | 1 | 13 | 0 | 0.30102999 | 0          | 12 | 0 | 0.14385241 | 0          |
| chr3 | 171904607 | 172016586 | 111980 | 2 | 13 | 0 | 0.41271556 | 0          | 11 | 0 | 0.09334429 | 0          |
| chr3 | 172016586 | 172058885 | 42300  | 1 | 13 | 0 | 0.5498098  | 0          | 10 | 0 | 0.0574087  | 0          |
| chr3 | 172058885 | 172350612 | 291728 | 8 | 13 | 0 | 0.7153891  | 0          | 9  | 0 | 0.0331093  | 0          |
| chr3 | 172350612 | 172538403 | 187792 | 6 | 13 | 0 | 0.41271556 | 0          | 11 | 0 | 0.09334429 | 0          |
| chr3 | 172538403 | 172560272 | 21870  | 1 | 12 | 0 | 0.30102999 | 0          | 11 | 0 | 0.14385241 | 0          |
| chr3 | 172560272 | 172632382 | 72111  | 1 | 11 | 0 | 0.30102999 | 0          | 10 | 0 | 0.14303407 | 0          |
| chr3 | 172632382 | 172694812 | 62431  | 1 | 11 | 0 | 0.41444892 | 0          | 9  | 0 | 0.09154957 | 0          |
| chr3 | 172694812 | 172735030 | 40219  | 2 | 13 | 0 | 0.5498098  | 0          | 10 | 1 | 0.0574087  | 0.30102999 |
| chr3 | 172735030 | 172735089 | 60     | 1 | 13 | 0 | 0.41271556 | 0          | 11 | 1 | 0.09334429 | 0.30102999 |
| chr3 | 172735089 | 172798434 | 63346  | 2 | 13 | 0 | 0.5498098  | 0          | 10 | 0 | 0.0574087  | 0          |
| chr3 | 172798434 | 172798493 | 60     | 1 | 13 | 0 | 0.41271556 | 0          | 11 | 1 | 0.09334429 | 0.30102999 |
| chr3 | 172798493 | 172835272 | 36780  | 1 | 13 | 0 | 0.5498098  | 0          | 10 | 0 | 0.0574087  | 0          |
| chr3 | 172835272 | 172835331 | 60     | 1 | 14 | 0 | 0.5498098  | 0          | 11 | 0 | 0.0574087  | 0          |
| chr3 | 172835331 | 173076361 | 241031 | 2 | 13 | 0 | 0.41271556 | 0          | 11 | 0 | 0.09334429 | 0          |
| chr3 | 173076361 | 173198136 | 121776 | 2 | 13 | 0 | 0.5498098  | 0          | 10 | 0 | 0.0574087  | 0          |
| chr3 | 173198136 | 173198195 | 60     | 1 | 13 | 0 | 0.41271556 | 0          | 11 | 0 | 0.09334429 | 0          |
| chr3 | 173198195 | 173302774 | 104580 | 3 | 13 | 0 | 0.5498098  | 0          | 10 | 0 | 0.0574087  | 0          |
| chr3 | 173302774 | 173411152 | 108379 | 2 | 12 | 0 | 0.41314172 | 0          | 10 | 0 | 0.09290028 | 0          |
| chr3 | 173411152 | 173458666 | 47515  | 2 | 13 | 0 | 0.5498098  | 0          | 10 | 0 | 0.0574087  | 0          |
| chr3 | 173458666 | 173458725 | 60     | 1 | 13 | 0 | 0.41271556 | 0          | 11 | 0 | 0.09334429 | 0          |
| chr3 | 173458725 | 173539520 | 80796  | 2 | 12 | 0 | 0.41314172 | 0          | 10 | 0 | 0.09290028 | 0          |
| chr3 | 173539520 | 173614890 | 75371  | 2 | 13 | 0 | 0.30102999 | 0          | 12 | 0 | 0.14385241 | 0          |
| chr3 | 173614890 | 173740143 | 125254 | 2 | 13 | 0 | 0.41271556 | 0          | 11 | 0 | 0.09334429 | 0          |
| chr3 | 173740143 | 173830379 | 90237  | 2 | 12 | 0 | 0.41314172 | 0          | 10 | 0 | 0.09290028 | 0          |
| chr3 | 173830379 | 174033302 | 202924 | 4 | 10 | 0 | 0.30102999 | 0          | 9  | 0 | 0.14135546 | 0          |
| chr3 | 174033302 | 174378043 | 344742 | 4 | 9  | 0 | 0.20975986 | 0          | 9  | 0 | 0.20975986 | 0          |
| chr3 | 174378043 | 174713426 | 335384 | 7 | 10 | 0 | 0.30102999 | 0          | 9  | 0 | 0.14135546 | 0          |
| chr3 | 174713426 | 174821844 | 108419 | 2 | 9  | 0 | 0.30102999 | 0          | 8  | 0 | 0.13872638 | 0          |
| chr3 | 174821844 | 174821903 | 60     | 1 | 10 | 0 | 0.30102999 | 0          | 9  | 0 | 0.14135546 | 0          |
| chr3 | 174821903 | 174955077 | 133175 | 2 | 9  | 0 | 0.30102999 | 0          | 8  | 0 | 0.13872638 | 0          |
| chr3 | 174955077 | 175008609 | 53533  | 1 | 8  | 0 | 0.30102999 | 0          | 7  | 0 | 0.13499366 | 0          |
| chr3 | 175008609 | 175060188 | 51580  | 1 | 7  | 0 | 0.30102999 | 0          | 6  | 0 | 0.129913   | 0          |
| chr3 | 175060188 | 175125133 | 64946  | 2 | 7  | 0 | 0.20469099 | 0          | 7  | 0 | 0.20469099 | 0          |
| chr3 | 175125133 | 175268482 | 143350 | 3 | 6  | 0 | 0.20064824 | 0          | 6  | 0 | 0.20064824 | 0          |
| chr3 | 175268482 | 175347833 | 79352  | 2 | 5  | 0 | 0.12309572 | 0          | 6  | 0 | 0.30102999 | 0          |
| chr3 | 175347833 | 175347892 | 60     | 1 | 6  | 0 | 0.20064824 | 0          | 6  | 0 | 0.20064824 | 0          |
| chr3 | 175347892 | 175468381 | 120490 | 2 | 5  | 0 | 0.12309572 | 0          | 6  | 0 | 0.30102999 | 0          |
| chr3 | 175468381 | 175468440 | 60     | 1 | 6  | 0 | 0.20064824 | 0          | 6  | 1 | 0.20064824 | 0.30102999 |
| chr3 | 175468440 | 175568222 | 99783  | 1 | 5  | 0 | 0.12309572 | 0          | 6  | 1 | 0.30102999 | 0.30102999 |
| chr3 | 175568222 | 175568281 | 60     | 1 | 6  | 0 | 0.20064824 | 0          | 6  | 1 | 0.20064824 | 0.30102999 |
| chr3 | 175568281 | 175699047 | 130767 | 1 | 3  | 0 | 0.3070643  | 0          | 6  | 1 | 0.63695542 | 0.30102999 |
| chr3 | 175699047 | 175809788 | 110742 | 1 | 3  | 0 | 0.3070643  | 0          | 6  | 0 | 0.63695542 | 0          |
| chr3 | 175809788 | 176025124 | 215337 | 2 | 5  | 0 | 0.07511598 | 0          | 7  | 0 | 0.43181735 | 0          |
| chr3 | 176025124 | 176157699 | 132576 | 2 | 7  | 0 | 0.20469099 | 0          | 7  | 0 | 0.20469099 | 0          |
| chr3 | 176157699 | 176157758 | 60     | 1 | 8  | 0 | 0.30102999 | 0          | 7  | 0 | 0.13499366 | 0          |
| chr3 | 176157758 | 176272287 | 114530 | 1 | 7  | 0 | 0.30102999 | 0          | 6  | 0 | 0.129913   | 0          |
| chr3 | 176272287 | 176272346 | 60     | 1 | 7  | 0 | 0.30102999 | 0          | 6  | 1 | 0.129913   | 0.30102999 |
| chr3 | 176272346 | 176483587 | 211242 | 2 | 4  | 0 | 0.06713722 | 0          | 6  | 0 | 0.44141547 | 0          |
| chr3 | 176483587 | 176551757 | 68171  | 2 | 5  | 0 | 0.12309572 | 0          | 6  | 0 | 0.30102999 | 0          |
| chr3 | 176551757 | 176845144 | 293388 | 6 | 4  | 0 | 0.06713722 | 0          | 6  | 0 | 0.44141547 | 0          |
| chr3 | 176845144 | 177197497 | 352354 | 5 | 5  | 0 | 0.12309572 | 0          | 6  | 0 | 0.30102999 | 0          |
| chr3 | 177197497 | 177329227 | 131731 | 3 | 7  | 0 | 0.30102999 | 0          | 6  | 0 | 0.129913   | 0          |
| chr3 | 177329227 | 177560267 | 231041 | 3 | 8  | 0 | 0.4250187  | 0          | 6  | 0 | 0.08122616 | 0          |
| chr3 | 177560267 | 177710016 | 149750 | 1 | 7  | 0 | 0.30102999 | 0          | 6  | 0 | 0.129913   | 0          |
| chr3 | 177710016 | 177710075 | 60     | 1 | 8  | 0 | 0.4250187  | 0          | 6  | 0 | 0.08122616 | 0          |
| chr3 | 177710075 | 178017330 | 307256 | 2 | 6  | 0 | 0.20064824 | 0          | 6  | 0 | 0.20064824 | 0          |
| chr3 | 178017330 | 178017389 | 60     | 1 | 1  | 0 | 0.42015402 | 0.30102999 | 7  | 0 | 0.08584816 | 0          |
| chr3 | 178017389 | 178164664 | 147276 | 2 | 8  | 1 | 0.30102999 | 0.30102999 | 7  | 0 | 0.13499366 | 0          |
| chr3 | 178164664 | 178284365 | 119702 | 3 | 9  | 1 | 0.42015402 | 0.30102999 | 7  | 0 | 0.08584816 | 0          |
| chr3 | 178284365 | 178420467 | 136103 | 3 | 8  | 1 | 0.30102999 | 0.30102999 | 7  | 0 | 0.13499366 | 0          |
| chr3 | 178420467 | 178420526 | 60     | 1 | 10 | 1 | 0.30102999 | 0.30102999 | 9  | 0 | 0.14135546 | 0          |
| chr3 | 178420526 | 178471351 | 50826  | 1 | 9  | 1 | 0.30102999 | 0.30102999 | 8  | 0 | 0.13872638 | 0          |
| chr3 | 178471351 | 178521877 | 50468  | 1 | 9  | 1 | 0.20975986 | 0.30102999 | 9  | 0 | 0.20975986 | 0          |
| chr3 | 178521877 | 178521936 | 60     | 1 | 11 | 1 | 0.30102999 | 0.30102999 | 10 | 0 | 0.14303407 | 0          |
| chr3 | 178521936 | 178622708 | 100773 | 2 | 11 | 1 | 0.41444892 | 0.30102999 | 9  | 0 | 0.09154957 | 0          |
| chr3 | 178622708 | 178622767 | 60     | 1 | 11 | 1 | 0.21200206 | 0.30102999 | 11 | 0 | 0.21200206 | 0          |
| chr3 | 178622767 | 178742237 | 119471 | 1 | 10 | 1 | 0.14303407 | 0.30102999 | 11 | 0 | 0.30102999 | 0          |
| chr3 | 178742237 | 178742296 | 60     | 1 | 10 | 1 | 0.09290028 | 0.30102999 | 12 | 0 | 0.41314172 | 0          |
| chr3 | 178742296 | 178764048 | 21753  | 1 | 10 | 1 | 0.21118145 | 0.30102999 | 10 | 0 | 0.21118145 | 0          |
| chr3 | 178764048 | 178764107 | 60     | 1 | 11 | 1 | 0.30102999 | 0.30102999 | 10 | 0 | 0.14303407 | 0          |
| chr3 | 178764107 | 178879119 | 115013 | 3 | 10 | 1 | 0.21118145 | 0.30102999 | 10 | 0 | 0.21118145 | 0          |
| chr3 | 178879119 | 178879178 | 60     | 1 | 11 | 1 | 0.30102999 | 0.30102999 | 10 | 0 | 0.14303407 | 0          |
| chr3 | 178879178 | 179095030 | 215853 | 7 | 11 | 1 | 0.41444892 | 0.30102999 | 9  | 0 | 0.09154957 | 0          |
| chr3 | 179095030 | 179196273 | 101244 | 3 | 11 | 1 | 0.55623409 | 0.30102999 | 8  | 0 | 0.05490675 | 0          |
| chr3 | 179196273 | 179277087 | 80815  | 1 | 11 | 1 | 0.73110763 | 0.30102999 | 7  | 0 | 0.03037338 | 0          |
| chr3 | 179277087 | 179306327 | 29241  | 3 | 11 | 1 | 0.55623409 | 0.30102999 | 8  | 0 | 0.05490675 | 0          |
| chr3 | 179306327 | 179328710 | 22384  | 1 | 10 | 1 | 0.56314362 | 0.30102999 | 7  | 0 | 0.05232577 | 0          |
| chr3 | 179328710 | 179389917 | 61208  | 2 | 10 | 1 | 0.4167287  | 0.30102999 | 8  | 0 | 0.08923391 | 0          |
| chr3 | 179389917 | 179448056 | 58140  | 3 | 10 | 1 | 0.30102999 | 0.30102999 | 9  | 0 | 0.14135546 | 0          |
| chr3 | 179448056 | 179483463 | 35408  | 1 | 10 | 1 | 0.4167287  | 0.30102999 | 8  | 0 | 0.08923391 | 0          |
| chr3 | 179483463 | 179553430 | 69968  | 3 | 10 | 1 | 0.30102999 | 0.30102999 | 9  | 0 | 0.14135546 | 0          |
| chr3 | 179553430 | 179593210 | 39781  | 1 | 1  | 0 | 0.20975986 | 0.30102999 | 9  | 0 | 0.20975986 | 0          |
| chr3 | 179593210 | 179666115 | 72906  | 3 | 9  | 1 | 0.20975986 | 0.1218695  | 9  | 1 | 0.20975986 | 0.1218695  |
| chr3 | 179666115 | 179666174 | 60     | 1 | 9  | 2 | 0.14135546 | 0.30102999 | 10 | 1 | 0.30102999 | 0.05404976 |
| chr3 | 179666174 | 179734228 | 68055  | 2 | 8  | 2 | 0.08923391 | 0.30102999 | 10 | 1 | 0.4167287  | 0.05404976 |
| chr3 | 179734228 | 179734287 | 60     | 1 | 9  | 2 | 0.14135546 | 0.30102999 | 10 | 1 | 0.30102999 | 0.05404976 |
| chr3 | 179734287 | 179753977 | 19691  | 1 | 8  | 2 | 0.08923391 | 0.30102999 | 10 | 1 | 0.4167287  | 0.05404976 |
| chr3 | 179753977 | 179859594 | 105618 | 1 | 8  | 2 | 0.20764654 | 0.30102999 | 8  | 1 | 0.20764654 | 0.05404976 |
| chr3 | 179859594 | 179859653 | 60     | 1 | 8  | 2 | 0.13872638 | 0.30102999 | 9  | 1 | 0.30102999 | 0.05404976 |
| chr3 | 179859653 | 179899339 | 39687  | 1 | 8  | 2 | 0.20764654 | 0.30102999 | 8  | 1 | 0.20764654 | 0.05404976 |
| chr3 | 179899339 | 180022216 | 122878 | 1 | 7  | 1 | 0.122878   | 0.1218695  | 8  | 1 | 0.30102999 | 0.1218695  |
| chr3 | 180022216 | 180261965 | 239750 | 2 | 6  | 1 | 0.129913   | 0.30102999 | 7  | 0 | 0.30102999 | 0.1218695  |
| chr3 | 180261965 | 180262024 | 60     | 1 | 6  | 1 | 0.129913   | 0.1218695  | 7  | 1 | 0.30102999 | 0.1218695  |
| chr3 | 180262024 | 180320911 | 58888  | 1 | 5  | 1 | 0.07511598 | 0.1218695  | 7  | 1 | 0.43181735 | 0.1218695  |

|      |           |           |        |    |    |   |            |            |    |   |            |            |
|------|-----------|-----------|--------|----|----|---|------------|------------|----|---|------------|------------|
| chr3 | 183245731 | 183660527 | 414797 | 14 | 7  | 2 | 0.08584816 | 0.1575501  | 9  | 2 | 0.42015402 | 0.1575501  |
| chr3 | 183660527 | 183660580 | 54     | 1  | 7  | 2 | 0.03037338 | 0.1575501  | 11 | 2 | 0.73110763 | 0.1575501  |
| chr3 | 183660580 | 183752847 | 92268  | 2  | 7  | 2 | 0.05232577 | 0.1575501  | 10 | 2 | 0.56314362 | 0.1575501  |
| chr3 | 183752847 | 183778261 | 25415  | 2  | 8  | 2 | 0.08923391 | 0.1575501  | 10 | 2 | 0.4167287  | 0.1575501  |
| chr3 | 183778261 | 184036953 | 258693 | 15 | 8  | 2 | 0.13872638 | 0.1575501  | 9  | 2 | 0.30102999 | 0.1575501  |
| chr3 | 184036953 | 184084548 | 47596  | 4  | 7  | 2 | 0.08584816 | 0.1575501  | 9  | 2 | 0.42015402 | 0.1575501  |
| chr3 | 184084548 | 184523379 | 438832 | 11 | 8  | 2 | 0.13872638 | 0.1575501  | 9  | 2 | 0.30102999 | 0.1575501  |
| chr3 | 184523379 | 184523438 | 60     | 1  | 8  | 2 | 0.08923391 | 0.1575501  | 10 | 2 | 0.4167287  | 0.1575501  |
| chr3 | 184523438 | 184548606 | 25169  | 1  | 8  | 2 | 0.13872638 | 0.1575501  | 9  | 2 | 0.30102999 | 0.1575501  |
| chr3 | 184548606 | 184604158 | 55553  | 1  | 7  | 2 | 0.08584816 | 0.1575501  | 9  | 2 | 0.42015402 | 0.1575501  |
| chr3 | 184604158 | 184604217 | 60     | 1  | 7  | 2 | 0.05232577 | 0.1575501  | 10 | 2 | 0.56314362 | 0.1575501  |
| chr3 | 184604217 | 184684444 | 80228  | 2  | 7  | 2 | 0.05232577 | 0.30102999 | 10 | 1 | 0.56314362 | 0.05404976 |
| chr3 | 184684444 | 184684503 | 60     | 1  | 8  | 2 | 0.03209037 | 0.30102999 | 12 | 1 | 0.72109894 | 0.05404976 |
| chr3 | 184684503 | 184724704 | 40202  | 1  | 8  | 2 | 0.08923391 | 0.30102999 | 10 | 1 | 0.4167287  | 0.05404976 |
| chr3 | 184724704 | 184724763 | 60     | 1  | 9  | 2 | 0.14135546 | 0.30102999 | 10 | 1 | 0.30102999 | 0.05404976 |
| chr3 | 184724763 | 184799629 | 74867  | 1  | 9  | 0 | 0.14135546 | 0          | 10 | 1 | 0.30102999 | 0.30102999 |
| chr3 | 184799629 | 184869065 | 69437  | 3  | 9  | 0 | 0.0331093  | 0          | 13 | 1 | 0.71538971 | 0.30102999 |
| chr3 | 184869065 | 184869124 | 60     | 1  | 10 | 0 | 0.0574087  | 0          | 13 | 1 | 0.5498098  | 0.30102999 |
| chr3 | 184869124 | 184906121 | 36998  | 1  | 10 | 0 | 0.09290028 | 0          | 12 | 1 | 0.41314172 | 0.30102999 |
| chr3 | 184906121 | 184935913 | 29793  | 2  | 9  | 0 | 0.09154957 | 0          | 11 | 1 | 0.41444892 | 0.30102999 |
| chr3 | 184935913 | 184935965 | 53     | 1  | 1  | 1 | 0.0558833  | 0.1218695  | 12 | 1 | 0.55190077 | 0.1218695  |
| chr3 | 184935965 | 184962751 | 30287  | 1  | 9  | 0 | 0.0558833  | 0          | 12 | 1 | 0.55190077 | 0.30102999 |
| chr3 | 184962751 | 185036237 | 69887  | 1  | 9  | 0 | 0.20975986 | 0          | 9  | 1 | 0.20975986 | 0.30102999 |
| chr3 | 185036237 | 185036296 | 60     | 1  | 0  | 0 | 0.14135546 | 0          | 10 | 1 | 0.30102999 | 0.30102999 |
| chr3 | 185036296 | 185169017 | 132722 | 3  | 9  | 0 | 0.20975986 | 0          | 9  | 1 | 0.20975986 | 0.30102999 |
| chr3 | 185169017 | 185210992 | 41976  | 2  | 9  | 1 | 0.20975986 | 0.05404976 | 9  | 2 | 0.20975986 | 0.30102999 |
| chr3 | 185210992 | 185252583 | 41592  | 1  | 9  | 0 | 0.20975986 | 0          | 9  | 2 | 0.20975986 | 0.61140001 |
| chr3 | 185252583 | 185307872 | 55290  | 1  | 9  | 0 | 0.30102999 | 0          | 8  | 2 | 0.13872638 | 0.61140001 |
| chr3 | 185307872 | 185307931 | 60     | 1  | 9  | 1 | 0.20975986 | 0.05404976 | 9  | 2 | 0.20975986 | 0.30102999 |
| chr3 | 185307931 | 185348867 | 40937  | 1  | 8  | 1 | 0.20764654 | 0.05404976 | 8  | 2 | 0.20764654 | 0.30102999 |
| chr3 | 185348867 | 185419048 | 70182  | 1  | 8  | 1 | 0.30102999 | 0.05404976 | 7  | 2 | 0.13499366 | 0.30102999 |
| chr3 | 185419048 | 185463211 | 44164  | 2  | 8  | 2 | 0.30102999 | 0.1575501  | 7  | 2 | 0.13499366 | 0.1575501  |
| chr3 | 185463211 | 185463270 | 60     | 1  | 9  | 2 | 0.42015402 | 0.1575501  | 2  | 2 | 0.08584816 | 0.1575501  |
| chr3 | 185463270 | 185539081 | 75812  | 2  | 8  | 2 | 0.30102999 | 0.1575501  | 7  | 2 | 0.13499366 | 0.1575501  |
| chr3 | 185539081 | 185539140 | 60     | 1  | 9  | 2 | 0.20975986 | 0.1575501  | 9  | 2 | 0.20975986 | 0.1575501  |
| chr3 | 185539140 | 185711222 | 172083 | 4  | 9  | 2 | 0.42015402 | 0.1575501  | 7  | 2 | 0.08584816 | 0.1575501  |
| chr3 | 185711222 | 185823405 | 112184 | 2  | 7  | 2 | 0.20469099 | 0.1575501  | 7  | 2 | 0.20469099 | 0.1575501  |
| chr3 | 185823405 | 185823458 | 54     | 1  | 8  | 2 | 0.30102999 | 0.1575501  | 7  | 2 | 0.13499366 | 0.1575501  |
| chr3 | 185823458 | 185969574 | 146117 | 3  | 6  | 2 | 0.129913   | 0.1575501  | 7  | 2 | 0.30102999 | 0.1575501  |
| chr3 | 185969574 | 186235972 | 266399 | 4  | 6  | 2 | 0.129913   | 0.30102999 | 7  | 1 | 0.30102999 | 0.05404976 |
| chr3 | 186235972 | 186236031 | 60     | 1  | 6  | 2 | 0.129913   | 0.1575501  | 7  | 2 | 0.30102999 | 0.1575501  |
| chr3 | 186236031 | 186303354 | 67324  | 4  | 5  | 2 | 0.07511598 | 0.1575501  | 7  | 2 | 0.43181735 | 0.1575501  |
| chr3 | 186303354 | 186303413 | 60     | 1  | 6  | 2 | 0.129913   | 0.1575501  | 7  | 2 | 0.30102999 | 0.1575501  |
| chr3 | 186303413 | 186370669 | 67257  | 2  | 5  | 2 | 0.07511598 | 0.1575501  | 7  | 2 | 0.43181735 | 0.1575501  |
| chr3 | 186370669 | 186394793 | 24125  | 2  | 6  | 2 | 0.129913   | 0.1575501  | 7  | 2 | 0.30102999 | 0.1575501  |
| chr3 | 186394793 | 186470781 | 75989  | 2  | 6  | 2 | 0.129913   | 0.30102999 | 7  | 1 | 0.30102999 | 0.05404976 |
| chr3 | 186470781 | 186518971 | 48191  | 5  | 6  | 2 | 0.129913   | 0.1575501  | 7  | 2 | 0.30102999 | 0.1575501  |
| chr3 | 186518971 | 186760613 | 241643 | 5  | 6  | 2 | 0.129913   | 0.30102999 | 7  | 1 | 0.30102999 | 0.05404976 |
| chr3 | 186760613 | 186794754 | 34142  | 1  | 5  | 2 | 0.07511598 | 0.30102999 | 7  | 1 | 0.43181735 | 0.05404976 |
| chr3 | 186794754 | 186794813 | 60     | 1  | 5  | 2 | 0.07511598 | 0.1575501  | 7  | 2 | 0.43181735 | 0.1575501  |
| chr3 | 186794813 | 186936981 | 142169 | 3  | 5  | 2 | 0.07511598 | 0.30102999 | 7  | 1 | 0.43181735 | 0.05404976 |
| chr3 | 186936981 | 187086869 | 149889 | 4  | 4  | 2 | 0.03812622 | 0.30102999 | 7  | 1 | 0.60763643 | 0.05404976 |
| chr3 | 187086869 | 187454155 | 367287 | 8  | 5  | 2 | 0.07511598 | 0.30102999 | 7  | 1 | 0.43181735 | 0.05404976 |
| chr3 | 187454155 | 187637107 | 182953 | 2  | 5  | 2 | 0.03812622 | 0.61140001 | 7  | 0 | 0.60763643 | 0.05404976 |
| chr3 | 187637107 | 187637166 | 60     | 1  | 5  | 2 | 0.07511598 | 0.30102999 | 7  | 1 | 0.43181735 | 0.05404976 |
| chr3 | 187637166 | 187832390 | 195225 | 2  | 5  | 1 | 0.07511598 | 0.30102999 | 7  | 0 | 0.43181735 | 0          |
| chr3 | 187832390 | 187894262 | 61873  | 2  | 6  | 1 | 0.129913   | 0.1218695  | 7  | 1 | 0.30102999 | 0.1218695  |
| chr3 | 187894262 | 187894321 | 60     | 1  | 6  | 1 | 0.08122616 | 0.1218695  | 8  | 1 | 0.4250187  | 0.1218695  |
| chr3 | 187894321 | 187943305 | 48985  | 1  | 5  | 1 | 0.04407651 | 0.1218695  | 8  | 1 | 0.58747015 | 0.1218695  |
| chr3 | 187943305 | 188123870 | 180566 | 4  | 5  | 1 | 0.07511598 | 0.1218695  | 7  | 1 | 0.43181735 | 0.1218695  |
| chr3 | 188123870 | 188123928 | 59     | 1  | 7  | 1 | 0.13499366 | 0.1218695  | 9  | 1 | 0.30102999 | 0.1218695  |
| chr3 | 188123928 | 188288589 | 164662 | 3  | 7  | 1 | 0.20469099 | 0.1218695  | 8  | 1 | 0.20469099 | 0.1218695  |
| chr3 | 188288589 | 188288648 | 60     | 1  | 7  | 1 | 0.13499366 | 0.1218695  | 8  | 1 | 0.30102999 | 0.1218695  |
| chr3 | 188288648 | 188389234 | 100587 | 2  | 6  | 1 | 0.129913   | 0.1218695  | 7  | 1 | 0.30102999 | 0.1218695  |
| chr3 | 188389234 | 188538433 | 149202 | 4  | 7  | 1 | 0.20469099 | 0.1218695  | 7  | 1 | 0.20469099 | 0.1218695  |
| chr3 | 188538433 | 188676096 | 69172  | 2  | 6  | 1 | 0.129913   | 0.1218695  | 7  | 1 | 0.30102999 | 0.1218695  |
| chr3 | 188676096 | 188710871 | 103266 | 2  | 8  | 1 | 0.30102999 | 0.1218695  | 7  | 1 | 0.13499366 | 0.1218695  |
| chr3 | 188710871 | 188822766 | 111896 | 2  | 8  | 1 | 0.20764654 | 0.1218695  | 8  | 1 | 0.20764654 | 0.1218695  |
| chr3 | 188822766 | 188997660 | 74895  | 4  | 8  | 1 | 0.13872638 | 0.1218695  | 9  | 1 | 0.30102999 | 0.1218695  |
| chr3 | 188997660 | 189083620 | 85961  | 2  | 9  | 1 | 0.14135546 | 0.1218695  | 10 | 1 | 0.30102999 | 0.1218695  |
| chr3 | 189083620 | 189083679 | 60     | 1  | 11 | 1 | 0.30102999 | 0.1218695  | 10 | 1 | 0.14303407 | 0.1218695  |
| chr3 | 189083679 | 18919473  | 235795 | 2  | 9  | 1 | 0.14135546 | 0.1218695  | 10 | 1 | 0.30102999 | 0.1218695  |
| chr3 | 18919473  | 18919532  | 60     | 1  | 10 | 1 | 0.21181845 | 0.1218695  | 10 | 1 | 0.21181845 | 0.1218695  |
| chr3 | 18919532  | 189456465 | 136934 | 3  | 9  | 1 | 0.14135546 | 0.1218695  | 10 | 1 | 0.30102999 | 0.1218695  |
| chr3 | 189456465 | 189507656 | 51192  | 1  | 8  | 1 | 0.13872638 | 0.1218695  | 9  | 1 | 0.30102999 | 0.1218695  |
| chr3 | 189507656 | 189688682 | 181027 | 5  | 8  | 1 | 0.13872638 | 0.30102999 | 9  | 0 | 0.30102999 | 0          |
| chr3 | 189688682 | 189947899 | 259218 | 6  | 6  | 1 | 0.08122616 | 0.30102999 | 8  | 0 | 0.4250187  | 0          |
| chr3 | 189947899 | 189947958 | 60     | 1  | 6  | 1 | 0.08122616 | 0.1218695  | 8  | 1 | 0.4250187  | 0.1218695  |
| chr3 | 189947958 | 190030816 | 82859  | 1  | 5  | 1 | 0.04407651 | 0.1218695  | 8  | 1 | 0.58747015 | 0.1218695  |
| chr3 | 190030816 | 190205705 | 174890 | 4  | 6  | 1 | 0.08122616 | 0.1218695  | 9  | 1 | 0.4250187  | 0.1218695  |
| chr3 | 190205705 | 190205764 | 60     | 1  | 7  | 1 | 0.08584816 | 0.1218695  | 9  | 1 | 0.42015402 | 0.1218695  |
| chr3 | 190205764 | 190604567 | 398804 | 7  | 6  | 1 | 0.08122616 | 0.30102999 | 8  | 0 | 0.4250187  | 0          |
| chr3 | 190604567 | 190811038 | 206472 | 1  | 5  | 1 | 0.04407651 | 0.30102999 | 8  | 0 | 0.58747015 | 0          |
| chr3 | 190811038 | 191290431 | 479394 | 8  | 5  | 1 | 0.07511598 | 0.30102999 | 7  | 0 | 0.43181735 | 0          |
| chr3 | 191290431 | 191413759 | 123229 | 2  | 5  | 1 | 0.07511598 | 0.1218695  | 7  | 0 | 0.43181735 | 0.1218695  |
| chr3 | 191413759 | 191413818 | 60     | 1  | 6  | 1 | 0.13499366 | 0.1218695  | 8  | 1 | 0.30102999 | 0.1218695  |
| chr3 | 191413818 | 191742477 | 328660 | 2  | 7  | 1 | 0.08122616 | 0.1218695  | 8  | 1 | 0.4250187  | 0.1218695  |
| chr3 | 191742477 | 192005036 | 262560 | 5  | 7  | 1 | 0.13499366 | 0.1218695  | 8  | 1 | 0.30102999 | 0.1218695  |
| chr3 | 192005036 | 192005095 | 60     | 1  | 10 | 1 | 0.4167287  | 0.1218695  | 8  | 1 | 0.08923391 | 0.1218695  |
| chr3 | 192005095 | 192059737 | 54643  | 1  | 10 | 1 | 0.4167287  | 0.30102999 | 8  | 0 | 0.08923391 | 0.1218695  |
| chr3 | 192059737 | 192142365 | 82629  | 2  | 9  | 1 |            |            |    |   |            |            |

|      |           |           |        |   |    |   |            |            |   |    |            |            |
|------|-----------|-----------|--------|---|----|---|------------|------------|---|----|------------|------------|
| chr3 | 195482573 | 195482632 | 60     | 1 | 10 | 2 | 0.56314362 | 0.30102999 | 7 | 1  | 0.05232577 | 0.05404976 |
| chr3 | 195482632 | 195740357 | 257726 | 5 | 10 | 1 | 0.56314362 | 0.1218695  | 7 | 1  | 0.05232577 | 0.1218695  |
| chr3 | 195740357 | 195789463 | 49107  | 3 | 11 | 2 | 0.73110763 | 0.30102999 | 7 | 1  | 0.30303738 | 0.05404976 |
| chr3 | 195789463 | 195840894 | 51432  | 4 | 11 | 2 | 0.73110763 | 0.1575501  | 7 | 2  | 0.30303738 | 0.1575501  |
| chr3 | 195840894 | 195908864 | 67971  | 1 | 11 | 1 | 0.73110763 | 0.1218695  | 7 | 1  | 0.30303738 | 0.1218695  |
| chr3 | 195908864 | 196120031 | 211168 | 8 | 11 | 1 | 0.55623409 | 0.1218695  | 8 | 1  | 0.05490675 | 0.1218695  |
| chr3 | 196120031 | 196120090 | 60     | 1 | 11 | 1 | 0.41444892 | 0.1218695  | 9 | 1  | 0.09154957 | 0.1218695  |
| chr3 | 196120090 | 196293986 | 173897 | 4 | 11 | 1 | 0.55623409 | 0.1218695  | 8 | 1  | 0.05490675 | 0.1218695  |
| chr3 | 196293986 | 196443776 | 149791 | 4 | 11 | 1 | 0.41444892 | 0.1218695  | 9 | 1  | 0.09154957 | 0.1218695  |
| chr3 | 196443776 | 196468474 | 24699  | 1 | 11 | 1 | 0.73110763 | 0.1218695  | 7 | 1  | 0.30303738 | 0.1218695  |
| chr3 | 196468474 | 196502693 | 34220  | 2 | 12 | 1 | 0.92532268 | 0.1218695  | 7 | 1  | 0.01667721 | 0.1218695  |
| chr3 | 196502693 | 196509171 | 6479   | 2 | 12 | 1 | 0.55190077 | 0.1218695  | 9 | 1  | 0.05658833 | 0.1218695  |
| chr3 | 196509171 | 196599138 | 89968  | 2 | 11 | 1 | 0.55623409 | 0.1218695  | 8 | 1  | 0.05490675 | 0.1218695  |
| chr3 | 196599138 | 196731338 | 132201 | 7 | 11 | 1 | 0.73110763 | 0.1218695  | 7 | 1  | 0.30303738 | 0.1218695  |
| chr3 | 196731338 | 196731395 | 58     | 1 | 11 | 1 | 0.55623409 | 0.05404976 | 8 | 2  | 0.05490675 | 0.30102999 |
| chr3 | 196731395 | 196771500 | 40106  | 2 | 11 | 1 | 0.55623409 | 0.1218695  | 8 | 1  | 0.05490675 | 0.1218695  |
| chr3 | 196771500 | 196771557 | 58     | 1 | 11 | 1 | 0.55623409 | 0.05404976 | 8 | 2  | 0.05490675 | 0.30102999 |
| chr3 | 196771557 | 196960822 | 189266 | 4 | 11 | 1 | 0.55623409 | 0.1218695  | 8 | 1  | 0.05490675 | 0.1218695  |
| chr3 | 196960822 | 196960881 | 60     | 1 | 11 | 1 | 0.41444892 | 0.1218695  | 9 | 1  | 0.09154957 | 0.1218695  |
| chr3 | 196960881 | 197023273 | 62393  | 1 | 10 | 0 | 0.55623409 | 0          | 8 | 1  | 0.05490675 | 0.30102999 |
| chr3 | 197023273 | 197238897 | 215225 | 3 | 10 | 0 | 0.56314362 | 0          | 7 | 1  | 0.05232577 | 0.30102999 |
| chr3 | 197238897 | 197310451 | 71855  | 3 | 10 | 0 | 0.56314362 | 0          | 7 | 1  | 0.05232577 | 0.61140001 |
| chr3 | 197310451 | 197446442 | 135992 | 3 | 10 | 0 | 0.42015402 | 0          | 7 | 2  | 0.08584816 | 0.61140001 |
| chr3 | 197446442 | 197446501 | 60     | 1 | 10 | 0 | 0.56314362 | 0          | 7 | 2  | 0.05232577 | 0.61140001 |
| chr3 | 197446501 | 197478171 | 31671  | 1 | 9  | 0 | 0.5732208  | 0          | 6 | 1  | 0.08475589 | 0.30102999 |
| chr3 | 197478171 | 197516977 | 38807  | 1 | 9  | 0 | 0.76806864 | 0          | 5 | 1  | 0.02473314 | 0.30102999 |
| chr3 | 197516977 | 197517036 | 60     | 1 | 10 | 0 | 0.74627054 | 0          | 6 | 2  | 0.02793176 | 0.61140001 |
| chr3 | 197517036 | 197544104 | 27069  | 1 | 10 | 0 | 0.4250187  | 0          | 6 | 2  | 0.08122616 | 0.61140001 |
| chr3 | 197544104 | 197608333 | 64230  | 3 | 8  | 0 | 0.30102999 | 0          | 7 | 2  | 0.13499366 | 0.61140001 |
| chr3 | 197608333 | 197608392 | 60     | 1 | 9  | 0 | 0.42015402 | 0          | 7 | 2  | 0.08584816 | 0.61140001 |
| chr3 | 197608392 | 197681739 | 73348  | 2 | 8  | 0 | 0.30102999 | 0          | 7 | 1  | 0.13499366 | 0.30102999 |
| chr3 | 197681739 | 197681798 | 60     | 1 | 9  | 0 | 0.30102999 | 0          | 8 | 2  | 0.13872638 | 0.61140001 |
| chr3 | 197681798 | 197766732 | 84935  | 3 | 8  | 0 | 0.4250187  | 0          | 6 | 1  | 0.08122616 | 0.30102999 |
| chr3 | 197766732 | 197766791 | 60     | 1 | 8  | 0 | 0.30102999 | 0          | 7 | 1  | 0.13499366 | 0.30102999 |
| chr3 | 197766791 | 197840339 | 73549  | 1 | 7  | 0 | 0.20469099 | 0          | 1 | 1  | 0.20469099 | 0.30102999 |
| chr4 | 71552     | 71611     | 60     | 1 | 3  | 1 | 0.93173516 | 0.00204627 | 0 | 6  | 0          | 1.31360226 |
| chr4 | 71611     | 221449    | 149839 | 2 | 3  | 1 | 0.93173516 | 0.01091641 | 0 | 4  | 0          | 0.76005302 |
| chr4 | 221449    | 221508    | 60     | 1 | 3  | 2 | 0.93173516 | 0.01053319 | 0 | 6  | 0          | 0.91219088 |
| chr4 | 221508    | 259110    | 37603  | 1 | 3  | 2 | 0.93173516 | 0.02162467 | 0 | 5  | 0          | 0.68214471 |
| chr4 | 259110    | 259169    | 60     | 1 | 3  | 3 | 0.93173516 | 0.01598258 | 0 | 7  | 0          | 0.84395715 |
| chr4 | 259169    | 315565    | 56397  | 1 | 3  | 2 | 0.93173516 | 0.01053319 | 0 | 6  | 0          | 0.91219088 |
| chr4 | 315565    | 365626    | 50062  | 4 | 3  | 3 | 0.93173516 | 0.01598258 | 0 | 7  | 0          | 0.84395715 |
| chr4 | 365626    | 522551    | 156926 | 5 | 3  | 5 | 0.93173516 | 0.02473314 | 0 | 9  | 0          | 0.76806864 |
| chr4 | 522551    | 628500    | 105950 | 2 | 3  | 4 | 0.93173516 | 0.01077081 | 0 | 9  | 0          | 1.01542894 |
| chr4 | 628500    | 755208    | 126709 | 4 | 3  | 4 | 0.93173516 | 0.00530919 | 0 | 10 | 0          | 1.2568129  |
| chr4 | 755208    | 864692    | 109485 | 3 | 3  | 5 | 0.93173516 | 0.00666883 | 0 | 11 | 0          | 1.20557689 |
| chr4 | 864692    | 927780    | 63089  | 1 | 3  | 5 | 0.93173516 | 0.01320236 | 0 | 10 | 0          | 0.97390707 |
| chr4 | 927780    | 927839    | 60     | 1 | 3  | 7 | 0.93173516 | 0.05232577 | 0 | 10 | 0          | 0.56314362 |
| chr4 | 927839    | 1004652   | 76814  | 2 | 3  | 6 | 0.93173516 | 0.02793176 | 0 | 10 | 0          | 0.74627054 |
| chr4 | 1004652   | 1004711   | 60     | 1 | 3  | 6 | 0.93173516 | 0.01518174 | 0 | 11 | 0          | 0.9449689  |
| chr4 | 1004711   | 1146766   | 142056 | 2 | 3  | 6 | 0.93173516 | 0.02793176 | 0 | 10 | 0          | 0.74627054 |
| chr4 | 1146766   | 1319275   | 172510 | 5 | 3  | 6 | 0.93173516 | 0.01518174 | 0 | 11 | 0          | 0.9449689  |
| chr4 | 1319275   | 1364014   | 44740  | 1 | 3  | 6 | 0.93173516 | 0.04875589 | 0 | 10 | 0          | 0.5732208  |
| chr4 | 1364014   | 1403261   | 39248  | 1 | 3  | 5 | 0.93173516 | 0.02473314 | 0 | 9  | 0          | 0.76806864 |
| chr4 | 1403261   | 1563818   | 160558 | 2 | 3  | 5 | 0.93173516 | 0.01320236 | 0 | 10 | 0          | 0.97390707 |
| chr4 | 1563818   | 1600380   | 36563  | 2 | 3  | 7 | 0.93173516 | 0.03037338 | 0 | 11 | 0          | 0.73110763 |
| chr4 | 1600380   | 1600439   | 60     | 1 | 3  | 7 | 0.51676182 | 0.03037338 | 1 | 11 | 0.02438896 | 0.73110763 |
| chr4 | 1600439   | 1678585   | 78147  | 1 | 3  | 7 | 0.51676182 | 0.08584816 | 1 | 9  | 0.02438896 | 0.42015402 |
| chr4 | 1678585   | 1800380   | 121796 | 3 | 3  | 6 | 0.93173516 | 0.08122616 | 1 | 8  | 0          | 0.4250187  |
| chr4 | 1800380   | 1875256   | 74877  | 2 | 3  | 6 | 0.51676182 | 0.04875589 | 1 | 9  | 0.02438896 | 0.5732208  |
| chr4 | 1875256   | 1944311   | 69056  | 2 | 3  | 6 | 0.51676182 | 0.01518174 | 1 | 11 | 0.02438896 | 0.9449689  |
| chr4 | 1944311   | 1944370   | 60     | 1 | 3  | 6 | 0.51676182 | 0.00778066 | 1 | 12 | 0.02438896 | 1.17038931 |
| chr4 | 1944370   | 1980946   | 36577  | 1 | 3  | 6 | 0.93173516 | 0.01518174 | 0 | 11 | 0          | 0.9449689  |
| chr4 | 1980946   | 2021560   | 40615  | 3 | 3  | 6 | 0.93173516 | 0.00778066 | 0 | 12 | 0          | 1.17038931 |
| chr4 | 2021560   | 2068404   | 46845  | 1 | 3  | 6 | 0.93173516 | 0.01518174 | 0 | 11 | 0          | 0.9449689  |
| chr4 | 2068404   | 2110275   | 41872  | 1 | 3  | 6 | 0.93173516 | 0.02793176 | 0 | 10 | 0          | 0.74627054 |
| chr4 | 2110275   | 2158354   | 48080  | 3 | 3  | 7 | 0.93173516 | 0.01518174 | 0 | 11 | 0          | 0.9449689  |
| chr4 | 2158354   | 2233676   | 75323  | 2 | 3  | 7 | 0.93173516 | 0.00859896 | 0 | 13 | 0          | 1.14735594 |
| chr4 | 2233676   | 258422    | 364747 | 7 | 3  | 7 | 0.93173516 | 0.01667721 | 0 | 12 | 0          | 0.92532268 |
| chr4 | 258422    | 2808212   | 209791 | 4 | 3  | 6 | 0.93173516 | 0.00778066 | 0 | 12 | 0          | 1.17038931 |
| chr4 | 2808212   | 2867343   | 59132  | 2 | 3  | 6 | 0.93173516 | 0.01518174 | 0 | 11 | 0          | 0.9449689  |
| chr4 | 2867343   | 3174976   | 307634 | 8 | 3  | 6 | 0.93173516 | 0.00778066 | 0 | 12 | 0          | 1.17038931 |
| chr4 | 3174976   | 3175035   | 60     | 1 | 3  | 6 | 0.93173516 | 0.00373523 | 0 | 13 | 0          | 1.42397267 |
| chr4 | 3175035   | 3434016   | 258982 | 6 | 3  | 6 | 0.93173516 | 0.00778066 | 0 | 12 | 0          | 1.17038931 |
| chr4 | 3434016   | 3434075   | 60     | 1 | 3  | 6 | 0.93173516 | 0.00373523 | 0 | 13 | 0          | 1.42397267 |
| chr4 | 3434075   | 3483540   | 49466  | 1 | 3  | 6 | 0.93173516 | 0.00778066 | 0 | 12 | 0          | 1.17038931 |
| chr4 | 3483540   | 3527216   | 43677  | 1 | 2  | 6 | 0.61140001 | 0.00778066 | 0 | 12 | 0          | 1.17038931 |
| chr4 | 3527216   | 3580260   | 53045  | 1 | 2  | 5 | 0.61140001 | 0.00317045 | 0 | 12 | 0          | 1.46403142 |
| chr4 | 3580260   | 3580319   | 60     | 1 | 3  | 5 | 0.93173516 | 0.00141024 | 0 | 13 | 0          | 1.7506523  |
| chr4 | 3580319   | 3636834   | 56516  | 1 | 2  | 5 | 0.61140001 | 0.00317045 | 0 | 12 | 0          | 1.46403142 |
| chr4 | 3636834   | 3776843   | 140010 | 3 | 2  | 5 | 0.30102999 | 0.00317045 | 1 | 12 | 0.05404976 | 1.46403142 |
| chr4 | 3776843   | 3845038   | 68196  | 1 | 2  | 4 | 0.30102999 | 0.00108487 | 1 | 12 | 0.05404976 | 1.81706455 |
| chr4 | 3845038   | 3845097   | 60     | 1 | 2  | 5 | 0.30102999 | 0.00317045 | 1 | 12 | 0.05404976 | 1.46403142 |
| chr4 | 3845097   | 4207758   | 362662 | 1 | 2  | 5 | 0.30102999 | 0.02473314 | 1 | 9  | 0.05404976 | 0.76806864 |
| chr4 | 4207758   | 4207817   | 60     | 1 | 2  | 5 | 0.51676182 | 0.02473314 | 1 | 9  | 0.02438896 | 0.76806864 |
| chr4 | 4207817   | 4249253   | 41437  | 1 | 3  | 4 | 0.51676182 | 0.01077081 | 1 | 9  | 0.02438896 | 1.01542894 |
| chr4 | 4249253   | 4283574   | 34322  | 2 | 3  | 4 | 0.51676182 | 0.00530919 | 1 | 10 | 0.02438896 | 1.2568129  |
| chr4 | 4283574   | 4283633   | 60     | 1 | 3  | 5 | 0.51676182 | 0.01320236 | 1 | 10 | 0.02438896 | 0.97390707 |
| chr4 | 4283633   | 4331339   | 47707  | 4 | 3  | 4 | 0.51676182 | 0.00530919 | 1 | 10 | 0.02438896 | 1.2568129  |
| chr4 | 4331339   | 4370244   | 38906  | 1 | 3  | 4 | 0.51676182 | 0.01077081 | 1 | 9  | 0.02438896 | 1.01542894 |
| chr4 | 4370244   | 4441881   | 71638  | 1 | 2  | 4 | 0.61140001 | 0.01077081 | 0 | 9  | 0          | 1.01542894 |
| chr4 | 4441881   | 4485131   | 43251  | 2 | 2  | 4 | 0.61140001 | 0.00530919 | 0 | 10 | 0          | 1.2568129  |
| chr4 | 4485131   | 4534990   | 49860  | 1 | 2  | 4 | 0.61140001 | 0.01077081 | 0 | 9  | 0          | 1.01542894 |
| chr4 | 4534990   | 4564313   | 29324  | 2 | 2  | 5 | 0.61140001 | 0.02473314 | 0 | 9  | 0          | 0.76806864 |
| chr4 | 4564313   | 4         |        |   |    |   |            |            |   |    |            |            |

|      |          |          |        |   |   |    |            |            |   |    |            |            |
|------|----------|----------|--------|---|---|----|------------|------------|---|----|------------|------------|
| chr4 | 7212835  | 7212894  | 60     | 1 | 3 | 6  | 0.30102999 | 0.00373523 | 2 | 13 | 0.08289318 | 1.42397267 |
| chr4 | 7212894  | 7633947  | 421054 | 9 | 3 | 6  | 0.30102999 | 0.00778066 | 2 | 12 | 0.08289318 | 1.17038931 |
| chr4 | 7633947  | 7668912  | 34966  | 2 | 3 | 6  | 0.30102999 | 0.00373523 | 2 | 13 | 0.08289318 | 1.42397267 |
| chr4 | 7668912  | 7731835  | 62924  | 2 | 3 | 6  | 0.30102999 | 0.00778066 | 2 | 12 | 0.08289318 | 1.17038931 |
| chr4 | 7731835  | 7760991  | 29157  | 2 | 3 | 6  | 0.30102999 | 0.00373523 | 2 | 13 | 0.08289318 | 1.42397267 |
| chr4 | 7760991  | 7831152  | 70162  | 1 | 3 | 6  | 0.30102999 | 0.00778066 | 2 | 12 | 0.08289318 | 1.17038931 |
| chr4 | 7831152  | 7880957  | 49806  | 1 | 3 | 6  | 0.30102999 | 0.01518174 | 2 | 11 | 0.08289318 | 0.9449689  |
| chr4 | 7880957  | 7938986  | 58030  | 2 | 3 | 6  | 0.30102999 | 0.00373523 | 2 | 13 | 0.08289318 | 1.42397267 |
| chr4 | 7938986  | 8019397  | 80412  | 3 | 3 | 6  | 0.17593012 | 0.00166733 | 3 | 14 | 0.17593012 | 1.70763027 |
| chr4 | 8019397  | 8072127  | 52731  | 2 | 3 | 6  | 0.30102999 | 0.00166733 | 2 | 14 | 0.08289318 | 1.70763027 |
| chr4 | 8072127  | 8113835  | 41709  | 2 | 3 | 6  | 0.17593012 | 0.00166733 | 3 | 14 | 0.17593012 | 1.70763027 |
| chr4 | 8113835  | 8224525  | 110691 | 3 | 3 | 6  | 0.30102999 | 0.00166733 | 2 | 14 | 0.08289318 | 1.70763027 |
| chr4 | 8224525  | 8308781  | 84257  | 2 | 3 | 6  | 0.51676182 | 0.00166733 | 1 | 14 | 0.02438896 | 1.70763027 |
| chr4 | 8308781  | 8368180  | 59400  | 2 | 3 | 6  | 0.51676182 | 6.86E-04   | 1 | 15 | 0.02438896 | 2.02387299 |
| chr4 | 8368180  | 8461355  | 93176  | 2 | 3 | 6  | 0.51676182 | 0.00778066 | 1 | 12 | 0.02438896 | 1.17038931 |
| chr4 | 8461355  | 8575359  | 114005 | 1 | 3 | 6  | 0.51676182 | 0.00373523 | 1 | 13 | 0.02438896 | 1.42397267 |
| chr4 | 8575359  | 8607464  | 32106  | 3 | 3 | 5  | 0.93173516 | 0.00666883 | 0 | 11 | 0.02557689 | 1.20557689 |
| chr4 | 8607464  | 8874214  | 266751 | 6 | 3 | 2  | 0.93173516 | 0.00221948 | 0 | 8  | 0          | 1.44210395 |
| chr4 | 8874214  | 8882456  | 8243   | 1 | 2 | 2  | 0.61140001 | 0.00221948 | 0 | 8  | 0          | 1.44210395 |
| chr4 | 8882456  | 8900505  | 18050  | 3 | 2 | 2  | 0.61140001 | 3.54E-04   | 0 | 9  | 0          | 1.74076927 |
| chr4 | 8900505  | 8900505  | 60     | 1 | 1 | 2  | 0.93173516 | 3.90E-04   | 0 | 10 | 0          | 2.0620585  |
| chr4 | 8900505  | 8927944  | 727381 | 1 | 2 | 2  | 0.30102999 | 3.90E-04   | 0 | 10 | 0          | 2.0620585  |
| chr4 | 927944   | 9766686  | 138743 | 2 | 1 | 5  | 0.30102999 | 0.00141024 | 0 | 13 | 0          | 1.7506523  |
| chr4 | 9766686  | 9829086  | 62401  | 2 | 1 | 6  | 0.30102999 | 0.00373523 | 0 | 13 | 0          | 1.42397267 |
| chr4 | 9829086  | 9865168  | 36083  | 1 | 1 | 5  | 0.30102999 | 0.01320236 | 0 | 9  | 0          | 0.97390707 |
| chr4 | 9865168  | 9896172  | 31005  | 2 | 1 | 2  | 0.30102999 | 0.00221948 | 0 | 8  | 0          | 1.44210395 |
| chr4 | 9896172  | 10076446 | 180275 | 5 | 1 | 4  | 0.30102999 | 0.02074938 | 0 | 0  | 0          | 0.79906872 |
| chr4 | 10076446 | 10252290 | 175845 | 2 | 1 | 3  | 0.30102999 | 0.0079614  | 0 | 8  | 0          | 1.07548421 |
| chr4 | 10252290 | 10417389 | 165100 | 1 | 0 | 3  | 0          | 0.0079614  | 0 | 8  | 0          | 1.07548421 |
| chr4 | 10417389 | 10641640 | 224252 | 5 | 0 | 7  | 0          | 0.01667721 | 1 | 12 | 0.30102999 | 0.92532268 |
| chr4 | 10641640 | 10747885 | 106246 | 3 | 0 | 8  | 0          | 0.03209037 | 1 | 11 | 0.30102999 | 0.72109894 |
| chr4 | 10747885 | 10865325 | 117441 | 1 | 0 | 8  | 0          | 0.05490675 | 1 | 12 | 0.30102999 | 0.55623409 |
| chr4 | 10865325 | 10865384 | 60     | 1 | 0 | 9  | 0          | 0.09154957 | 1 | 11 | 0.30102999 | 0.41444892 |
| chr4 | 10865384 | 11091079 | 225696 | 1 | 0 | 6  | 0          | 0.04875589 | 1 | 9  | 0.30102999 | 0.5732208  |
| chr4 | 11091079 | 11091138 | 60     | 1 | 0 | 7  | 0          | 0.08584816 | 1 | 9  | 0.30102999 | 0.42015402 |
| chr4 | 11091138 | 11280802 | 189665 | 1 | 0 | 3  | 0          | 0.0079614  | 1 | 8  | 0.30102999 | 1.07548421 |
| chr4 | 11280802 | 11400736 | 119935 | 3 | 0 | 4  | 0          | 0.02074938 | 1 | 8  | 0.30102999 | 0.79906872 |
| chr4 | 11400736 | 11401761 | 1026   | 2 | 0 | 10 | 0          | 0.14303407 | 0 | 11 | 0.30102999 | 0.30102999 |
| chr4 | 11401761 | 11431746 | 29986  | 1 | 0 | 6  | 0          | 0.04875589 | 1 | 8  | 0.30102999 | 0.5732208  |
| chr4 | 11431746 | 11612389 | 180644 | 1 | 0 | 6  | 0          | 0.08122616 | 1 | 8  | 0.30102999 | 0.4250187  |
| chr4 | 11612389 | 11612448 | 60     | 1 | 0 | 6  | 0          | 0.04875589 | 1 | 9  | 0.30102999 | 0.5732208  |
| chr4 | 11612448 | 11750089 | 137642 | 1 | 0 | 3  | 0          | 0.01598258 | 1 | 7  | 0.30102999 | 0.84395715 |
| chr4 | 11750089 | 11857246 | 107158 | 2 | 0 | 4  | 0          | 0.02074938 | 1 | 8  | 0.30102999 | 0.79906872 |
| chr4 | 11857246 | 11857305 | 60     | 1 | 0 | 7  | 0          | 0.03037338 | 1 | 11 | 0.30102999 | 0.73110763 |
| chr4 | 11857305 | 11977464 | 120160 | 1 | 0 | 7  | 0          | 0.05232577 | 1 | 10 | 0.30102999 | 0.56314362 |
| chr4 | 11977464 | 12273633 | 296170 | 2 | 0 | 6  | 0          | 0.30102999 | 1 | 5  | 0.30102999 | 0.12309572 |
| chr4 | 12273633 | 12273692 | 60     | 1 | 0 | 8  | 0          | 0.08923391 | 1 | 10 | 0.30102999 | 0.4167287  |
| chr4 | 12273692 | 12382630 | 108939 | 1 | 0 | 8  | 0          | 0.20764654 | 1 | 8  | 0.30102999 | 0.20764654 |
| chr4 | 12382630 | 12382689 | 60     | 1 | 0 | 8  | 0          | 0.13872638 | 1 | 9  | 0.30102999 | 0.30102999 |
| chr4 | 12382689 | 12496097 | 113409 | 1 | 0 | 8  | 0          | 0.20764654 | 1 | 8  | 0.30102999 | 0.20764654 |
| chr4 | 12496097 | 12496156 | 60     | 1 | 0 | 9  | 0          | 0.09154957 | 1 | 11 | 0.30102999 | 0.41444892 |
| chr4 | 12496156 | 12595138 | 98983  | 1 | 0 | 5  | 0          | 0.07511598 | 1 | 7  | 0.30102999 | 0.43181735 |
| chr4 | 12595138 | 12713420 | 118283 | 1 | 0 | 5  | 0          | 0.07511598 | 1 | 0  | 0          | 0.43181735 |
| chr4 | 12713420 | 12802689 | 89270  | 2 | 0 | 0  | 0          | 0.30102999 | 0 | 7  | 0          | 0.13499366 |
| chr4 | 12802689 | 12976287 | 173599 | 1 | 0 | 5  | 0          | 0.07511598 | 1 | 7  | 0          | 0.43181735 |
| chr4 | 12976287 | 12976346 | 60     | 1 | 0 | 5  | 0          | 0.04407651 | 1 | 8  | 0          | 0.58747015 |
| chr4 | 12976346 | 13214984 | 238639 | 1 | 0 | 5  | 0          | 0.07511598 | 1 | 0  | 0          | 0.43181735 |
| chr4 | 13214984 | 13343352 | 128369 | 1 | 0 | 4  | 0          | 0.11390336 | 0 | 5  | 0          | 0.30102999 |
| chr4 | 13343352 | 13369949 | 26598  | 2 | 0 | 5  | 0          | 0.07511598 | 1 | 7  | 0          | 0.43181735 |
| chr4 | 13369949 | 13481105 | 111157 | 3 | 0 | 4  | 0          | 0.06713722 | 1 | 6  | 0          | 0.44141547 |
| chr4 | 13481105 | 13542775 | 61671  | 2 | 0 | 6  | 0          | 0.129913   | 0 | 7  | 0          | 0.30102999 |
| chr4 | 13542775 | 13542834 | 60     | 1 | 0 | 6  | 0          | 0.08122616 | 1 | 8  | 0          | 0.4250187  |
| chr4 | 13542834 | 13625717 | 82884  | 2 | 0 | 5  | 0          | 0.07511598 | 1 | 7  | 0          | 0.43181735 |
| chr4 | 13625717 | 13628601 | 2885   | 2 | 0 | 5  | 0          | 0.02473314 | 1 | 9  | 0          | 0.76806864 |
| chr4 | 13628601 | 13718621 | 90021  | 1 | 0 | 4  | 0          | 0.02074938 | 1 | 8  | 0          | 0.79906872 |
| chr4 | 13718621 | 13820583 | 101963 | 2 | 0 | 5  | 0          | 0.01077081 | 1 | 9  | 0          | 1.01542894 |
| chr4 | 13820583 | 13889044 | 68462  | 2 | 0 | 5  | 0          | 0.00666883 | 0 | 11 | 0          | 1.20557689 |
| chr4 | 13889044 | 13950562 | 61519  | 2 | 0 | 5  | 0          | 0.00141024 | 0 | 13 | 0          | 1.7506523  |
| chr4 | 13950562 | 14062753 | 112192 | 1 | 0 | 5  | 0          | 0.00317045 | 0 | 12 | 0          | 1.46403142 |
| chr4 | 14062753 | 14062812 | 60     | 1 | 0 | 8  | 0          | 0.00998934 | 0 | 14 | 0          | 1.13428373 |
| chr4 | 14062812 | 14358235 | 295424 | 3 | 0 | 7  | 0          | 0.00859896 | 0 | 13 | 0          | 1.14735594 |
| chr4 | 14358235 | 14358294 | 60     | 1 | 0 | 7  | 0          | 0.00413023 | 0 | 14 | 0          | 1.39918918 |
| chr4 | 14358294 | 14454449 | 96156  | 1 | 0 | 6  | 0          | 0.00778066 | 0 | 12 | 0          | 1.17038931 |
| chr4 | 14454449 | 14578096 | 123648 | 3 | 0 | 6  | 0          | 0.00373523 | 0 | 13 | 0          | 1.42397267 |
| chr4 | 14578096 | 14631374 | 53279  | 2 | 0 | 8  | 0          | 0.00909834 | 0 | 14 | 0          | 1.13428373 |
| chr4 | 14631374 | 14631433 | 60     | 1 | 0 | 10 | 0          | 0.03344703 | 0 | 14 | 0          | 0.71353304 |
| chr4 | 14631433 | 14692174 | 60742  | 1 | 0 | 9  | 0          | 0.01817691 | 0 | 14 | 0          | 0.90719478 |
| chr4 | 14692174 | 14692233 | 60     | 1 | 0 | 10 | 0          | 0.01817691 | 0 | 15 | 0          | 0.90719478 |
| chr4 | 14692233 | 14787897 | 95665  | 2 | 0 | 9  | 0          | 0.00926608 | 0 | 15 | 0          | 1.13004284 |
| chr4 | 14787897 | 14820108 | 32212  | 1 | 0 | 8  | 0          | 0.00433294 | 0 | 15 | 0          | 1.3873209  |
| chr4 | 14820108 | 14987869 | 167762 | 4 | 0 | 8  | 0          | 0.00909834 | 0 | 14 | 0          | 1.13428373 |
| chr4 | 14987869 | 15135527 | 147659 | 5 | 0 | 10 | 0          | 0.01817691 | 0 | 15 | 0          | 0.90719478 |
| chr4 | 15135527 | 15302739 | 167213 | 1 | 0 | 9  | 0          | 0.00926608 | 0 | 15 | 0          | 1.13004284 |
| chr4 | 15302739 | 15371494 | 68756  | 3 | 0 | 9  | 0          | 0.00433294 | 0 | 16 | 0          | 1.3873209  |
| chr4 | 15371494 | 15478358 | 106865 | 4 | 0 | 10 | 0          | 0.00909834 | 0 | 16 | 0          | 1.13428373 |
| chr4 | 15478358 | 15685537 | 207180 | 5 | 0 | 9  | 0          | 0.00926608 | 0 | 15 | 0          | 1.13004284 |
| chr4 | 15685537 | 15724416 | 38880  | 1 | 0 | 9  | 0          | 0.01817691 | 0 | 14 | 0          | 0.90719478 |
| chr4 | 15724416 | 15768035 | 43620  | 2 | 0 | 10 | 0          | 0.03344703 | 0 | 14 | 0          | 0.71353304 |
| chr4 | 15768035 | 15768094 | 60     | 1 | 0 | 10 | 0          | 0.01817691 | 0 | 15 | 0          | 0.90719478 |
| chr4 | 15768094 | 15818178 | 50085  | 1 | 0 | 10 | 0          | 0.03344703 | 0 | 14 | 0          | 0.71353304 |
| chr4 | 15818178 | 15855129 | 36952  | 2 | 0 | 12 | 0          | 0.09290028 | 0 | 14 | 0          | 0.41314172 |
| chr4 | 15855129 | 16034980 | 179852 | 6 | 0 | 10 | 0          | 0.03344703 | 0 | 14 | 0          | 0.71353304 |
| chr4 | 16034980 | 16246453 | 211474 | 4 | 0 | 10 | 0          | 0.0574087  | 0 | 13 | 0          | 0.5498098  |
| chr4 | 16246453 | 16246512 | 60     | 1 | 0 | 11 | 0          | 0.0574087  | 0 | 14 | 0          | 0.5498098  |
| chr4 | 16246512 | 16358433 | 111922 | 1 | 0 | 11 | 0          | 0.09334429 | 0 | 13 | 0          | 0.41271556 |
| chr4 | 16358433 | 16482734 | 124302 | 1 | 0 | 10 | 0          | 0.0574087  | 0 | 13 | 0          | 0.5498098  |
| chr4 | 16482734 | 16482793 | 60     | 1 | 0 | 10 | 0          | 0.03344703 | 0 | 14 | 0          | 0.71353304 |
| chr4 | 16482793 | 16554028 | 71236  | 1 | 0 | 9  | 0          | 0.01817691 | 0 | 14 | 0          | 0.90719478 |

|      |          |          |        |    |   |    |   |            |   |    |            |            |
|------|----------|----------|--------|----|---|----|---|------------|---|----|------------|------------|
| chr4 | 18633460 | 18633519 | 60     | 1  | 0 | 4  | 0 | 0.11390336 | 1 | 5  | 0.30102999 | 0.30102999 |
| chr4 | 18633519 | 18839589 | 206071 | 1  | 0 | 3  | 0 | 0.17593012 | 1 | 3  | 0.30102999 | 0.17593012 |
| chr4 | 18839589 | 18839648 | 60     | 1  | 0 | 3  | 0 | 0.05670724 | 1 | 5  | 0.30102999 | 0.05670724 |
| chr4 | 18839648 | 19176896 | 337249 | 2  | 0 | 0  | 0 | 0          | 0 | 2  | 0          | 0.61140001 |
| chr4 | 19176896 | 19370059 | 193164 | 2  | 0 | 0  | 0 | 0          | 0 | 1  | 0          | 0.30102999 |
| chr4 | 19370059 | 19591913 | 221855 | 3  | 0 | 3  | 0 | 0.17593012 | 1 | 4  | 0          | 0.17593012 |
| chr4 | 19591913 | 19694001 | 102089 | 2  | 0 | 0  | 0 | 0.60763643 | 0 | 3  | 0          | 0.03812622 |
| chr4 | 19694001 | 19792069 | 98069  | 2  | 0 | 9  | 0 | 0.76806864 | 1 | 5  | 0.30102999 | 0.02473314 |
| chr4 | 19792069 | 19792128 | 60     | 1  | 0 | 9  | 0 | 0.57322208 | 1 | 6  | 0.30102999 | 0.04875589 |
| chr4 | 19792128 | 19990818 | 198691 | 2  | 0 | 6  | 0 | 0.20064824 | 1 | 6  | 0.30102999 | 0.20064824 |
| chr4 | 19990818 | 20216503 | 225686 | 2  | 0 | 9  | 0 | 0.14135546 | 2 | 10 | 0.61140001 | 0.30102999 |
| chr4 | 20216503 | 20254688 | 38186  | 2  | 0 | 11 | 0 | 0.05740087 | 2 | 14 | 0.61140001 | 0.54980898 |
| chr4 | 20254688 | 20294750 | 40063  | 2  | 0 | 11 | 0 | 0.03310993 | 2 | 15 | 0.61140001 | 0.71538971 |
| chr4 | 20294750 | 20324879 | 30130  | 1  | 0 | 11 | 0 | 0.05740087 | 2 | 14 | 0.61140001 | 0.54980898 |
| chr4 | 20324879 | 20324938 | 60     | 1  | 0 | 12 | 0 | 0.09290028 | 2 | 14 | 0.61140001 | 0.41314172 |
| chr4 | 20324938 | 20394896 | 69959  | 2  | 0 | 11 | 0 | 0.05740087 | 2 | 14 | 0.61140001 | 0.54980898 |
| chr4 | 20394896 | 20394955 | 60     | 1  | 0 | 12 | 0 | 0.01667721 | 2 | 17 | 0.61140001 | 0.92532268 |
| chr4 | 20394955 | 20490678 | 95724  | 2  | 0 | 11 | 0 | 0.01767679 | 1 | 16 | 0.30102999 | 0.91308053 |
| chr4 | 20490678 | 20541187 | 50510  | 3  | 0 | 11 | 0 | 0.00859896 | 2 | 17 | 0.61140001 | 1.14735594 |
| chr4 | 20541187 | 20563947 | 22761  | 1  | 0 | 11 | 0 | 0.00859896 | 1 | 17 | 0.30102999 | 1.14735594 |
| chr4 | 20563947 | 20564006 | 60     | 1  | 0 | 12 | 0 | 0.01667721 | 1 | 17 | 0.30102999 | 0.92532268 |
| chr4 | 20564006 | 20620650 | 56645  | 2  | 0 | 11 | 0 | 0.00859896 | 1 | 17 | 0.30102999 | 1.14735594 |
| chr4 | 20620650 | 20714840 | 94191  | 3  | 0 | 12 | 0 | 0.01667721 | 1 | 17 | 0.30102999 | 0.92532268 |
| chr4 | 20714840 | 20714899 | 60     | 1  | 0 | 13 | 0 | 0.03037338 | 1 | 17 | 0.30102999 | 0.73110763 |
| chr4 | 20714899 | 21403260 | 688362 | 19 | 0 | 12 | 0 | 0.01667721 | 1 | 17 | 0.30102999 | 0.92532268 |
| chr4 | 21403260 | 21482176 | 78917  | 3  | 0 | 11 | 0 | 0.00859896 | 1 | 17 | 0.30102999 | 1.14735594 |
| chr4 | 21482176 | 21602980 | 120805 | 3  | 0 | 10 | 0 | 0.00413023 | 1 | 17 | 0.30102999 | 1.39918918 |
| chr4 | 21602980 | 21868325 | 265346 | 4  | 0 | 10 | 0 | 0.00909834 | 1 | 16 | 0.30102999 | 1.13428373 |
| chr4 | 21868325 | 21868384 | 60     | 1  | 0 | 12 | 0 | 0.01667721 | 1 | 17 | 0.30102999 | 0.92532268 |
| chr4 | 21868384 | 22006216 | 137833 | 2  | 0 | 10 | 0 | 0.00909834 | 1 | 16 | 0.30102999 | 1.13428373 |
| chr4 | 22006216 | 22006275 | 60     | 1  | 0 | 10 | 0 | 0.00413023 | 1 | 17 | 0.30102999 | 1.39918918 |
| chr4 | 22006275 | 22176651 | 170377 | 1  | 0 | 9  | 0 | 0.00926608 | 1 | 15 | 0.30102999 | 1.13004284 |
| chr4 | 22176651 | 22422757 | 246107 | 3  | 0 | 8  | 0 | 0.03209037 | 1 | 12 | 0.30102999 | 0.72109894 |
| chr4 | 22422757 | 22459005 | 36249  | 2  | 0 | 8  | 0 | 0.01767679 | 1 | 13 | 0.30102999 | 0.91308053 |
| chr4 | 22459005 | 22459064 | 60     | 1  | 0 | 8  | 0 | 0.00909834 | 1 | 14 | 0.30102999 | 1.13428373 |
| chr4 | 22459064 | 22493944 | 34881  | 1  | 0 | 8  | 0 | 0.03209037 | 1 | 12 | 0.30102999 | 0.72109894 |
| chr4 | 22493944 | 22526538 | 32595  | 1  | 0 | 8  | 0 | 0.05490675 | 1 | 11 | 0.30102999 | 0.55623409 |
| chr4 | 22526538 | 22716554 | 190017 | 2  | 0 | 6  | 0 | 0.129913   | 1 | 7  | 0.30102999 | 0.30102999 |
| chr4 | 22716554 | 22726063 | 45510  | 1  | 0 | 5  | 0 | 0.07511598 | 1 | 7  | 0.30102999 | 0.43181735 |
| chr4 | 22726063 | 22927820 | 165758 | 2  | 0 | 3  | 0 | 0.01598258 | 1 | 7  | 0.30102999 | 0.84395715 |
| chr4 | 22927820 | 23211015 | 283196 | 3  | 0 | 6  | 0 | 0.04875589 | 1 | 9  | 0.30102999 | 0.57322008 |
| chr4 | 23211015 | 23313776 | 102762 | 1  | 0 | 4  | 0 | 0.01077081 | 1 | 9  | 0.30102999 | 1.01542894 |
| chr4 | 23313776 | 23515063 | 201288 | 1  | 0 | 1  | 0 | 3.39E-04   | 1 | 9  | 0.30102999 | 1.94674965 |
| chr4 | 23515063 | 23703416 | 188354 | 2  | 0 | 2  | 0 | 9.54E-04   | 1 | 9  | 0.30102999 | 1.74076927 |
| chr4 | 23703416 | 23756696 | 53281  | 2  | 0 | 4  | 0 | 0.00530919 | 1 | 10 | 0.30102999 | 1.25681219 |
| chr4 | 23756696 | 23756755 | 60     | 1  | 0 | 4  | 0 | 0.00247414 | 1 | 11 | 0.30102999 | 1.52371709 |
| chr4 | 23756755 | 23806994 | 50240  | 2  | 0 | 3  | 0 | 0.00378107 | 1 | 9  | 0.30102999 | 1.33111237 |
| chr4 | 23806994 | 23807053 | 60     | 1  | 0 | 4  | 0 | 0.00530919 | 1 | 10 | 0.30102999 | 1.25681219 |
| chr4 | 23807053 | 23886460 | 79408  | 2  | 0 | 1  | 0 | 3.39E-04   | 1 | 8  | 0.30102999 | 1.94674965 |
| chr4 | 23886460 | 23886517 | 58     | 1  | 0 | 4  | 0 | 0.00530919 | 1 | 10 | 0.30102999 | 1.25681219 |
| chr4 | 23886517 | 24068622 | 182106 | 1  | 0 | 1  | 0 | 4.80E-05   | 1 | 10 | 0.30102999 | 2.6588298  |
| chr4 | 24068622 | 24284414 | 215793 | 2  | 0 | 2  | 0 | 3.90E-04   | 1 | 10 | 0.30102999 | 2.0620585  |
| chr4 | 24284414 | 24284473 | 60     | 1  | 0 | 6  | 0 | 0.00373523 | 1 | 13 | 0.30102999 | 1.42397267 |
| chr4 | 24284473 | 24521837 | 237365 | 2  | 0 | 6  | 0 | 0.00778066 | 1 | 12 | 0.30102999 | 1.17038931 |
| chr4 | 24521837 | 24548281 | 26445  | 2  | 0 | 7  | 0 | 0.01667721 | 1 | 12 | 0.30102999 | 0.92532268 |
| chr4 | 24548281 | 24700363 | 152083 | 3  | 0 | 6  | 0 | 0.00778066 | 1 | 12 | 0.30102999 | 1.17038931 |
| chr4 | 24700363 | 24798376 | 98014  | 2  | 0 | 7  | 0 | 0.00183109 | 1 | 15 | 0.30102999 | 1.68336308 |
| chr4 | 24798376 | 24854752 | 56377  | 2  | 0 | 8  | 0 | 0.00433294 | 1 | 15 | 0.30102999 | 1.3873209  |
| chr4 | 24854752 | 24854811 | 60     | 1  | 0 | 9  | 0 | 0.00926608 | 1 | 15 | 0.30102999 | 1.13004284 |
| chr4 | 24854811 | 24893167 | 38357  | 1  | 0 | 8  | 0 | 0.00433294 | 1 | 15 | 0.30102999 | 1.3873209  |
| chr4 | 24893167 | 24893226 | 60     | 1  | 0 | 7  | 0 | 0.00188722 | 1 | 16 | 0.30102999 | 1.67551277 |
| chr4 | 24893226 | 25008199 | 114974 | 7  | 0 | 7  | 0 | 7.41E-04   | 1 | 16 | 0.30102999 | 2.00316618 |
| chr4 | 25008199 | 25175412 | 167214 | 3  | 0 | 7  | 0 | 0.00183109 | 1 | 15 | 0.30102999 | 1.68336308 |
| chr4 | 25175412 | 25277869 | 102458 | 3  | 0 | 8  | 0 | 0.00188722 | 1 | 16 | 0.30102999 | 1.67551277 |
| chr4 | 25277869 | 25315638 | 37770  | 2  | 0 | 9  | 0 | 0.00433294 | 1 | 16 | 0.30102999 | 1.3873209  |
| chr4 | 25315638 | 25352446 | 36609  | 1  | 0 | 9  | 0 | 0.00926608 | 1 | 15 | 0.30102999 | 1.13004284 |
| chr4 | 25352446 | 25352305 | 60     | 1  | 0 | 10 | 0 | 0.01817691 | 1 | 15 | 0.30102999 | 0.90719478 |
| chr4 | 25352305 | 25420099 | 67795  | 3  | 0 | 9  | 0 | 0.00926608 | 1 | 15 | 0.30102999 | 1.13004284 |
| chr4 | 25420099 | 25661606 | 241508 | 3  | 0 | 8  | 0 | 0.00433294 | 1 | 15 | 0.30102999 | 1.3873209  |
| chr4 | 25661606 | 25725177 | 63572  | 5  | 0 | 9  | 0 | 0.00926608 | 1 | 15 | 0.30102999 | 1.13004284 |
| chr4 | 25725177 | 25831923 | 106747 | 3  | 0 | 10 | 0 | 0.01817691 | 1 | 15 | 0.30102999 | 0.90719478 |
| chr4 | 25831923 | 25831982 | 60     | 1  | 0 | 11 | 0 | 0.01767679 | 1 | 16 | 0.30102999 | 0.91308053 |
| chr4 | 25831982 | 25903066 | 71085  | 2  | 0 | 10 | 0 | 0.01817691 | 1 | 15 | 0.30102999 | 0.90719478 |
| chr4 | 25903066 | 25941873 | 38808  | 2  | 0 | 10 | 0 | 0.00909834 | 1 | 16 | 0.30102999 | 1.13428373 |
| chr4 | 25941873 | 25941932 | 60     | 1  | 0 | 11 | 0 | 0.01767679 | 1 | 16 | 0.30102999 | 0.91308053 |
| chr4 | 25941932 | 26156709 | 214778 | 1  | 0 | 9  | 0 | 0.00926608 | 1 | 15 | 0.30102999 | 1.13004284 |
| chr4 | 26156709 | 26156768 | 60     | 1  | 0 | 9  | 0 | 0.00433294 | 1 | 16 | 0.30102999 | 1.3873209  |
| chr4 | 26156768 | 26252617 | 95850  | 1  | 0 | 9  | 0 | 0.01817691 | 1 | 14 | 0.30102999 | 0.90719478 |
| chr4 | 26252617 | 26252676 | 60     | 1  | 0 | 9  | 0 | 0.00926608 | 1 | 15 | 0.30102999 | 1.13004284 |
| chr4 | 26252676 | 26344351 | 91676  | 1  | 0 | 9  | 0 | 0.03310993 | 1 | 13 | 0.30102999 | 0.71538971 |
| chr4 | 26344351 | 26376036 | 31686  | 2  | 0 | 9  | 0 | 0.01817691 | 1 | 14 | 0.30102999 | 0.90719478 |
| chr4 | 26376036 | 26376095 | 60     | 1  | 0 | 9  | 0 | 0.00926608 | 1 | 15 | 0.30102999 | 1.13004284 |
| chr4 | 26376095 | 26459600 | 83506  | 2  | 0 | 8  | 0 | 0.01767679 | 1 | 13 | 0.30102999 | 0.91308053 |
| chr4 | 26459600 | 26585136 | 125537 | 3  | 0 | 8  | 0 | 0.00433294 | 1 | 15 | 0.30102999 | 1.3873209  |
| chr4 | 26585136 | 26585195 | 60     | 1  | 0 | 9  | 0 | 0.00433294 | 1 | 16 | 0.30102999 | 1.3873209  |
| chr4 | 26585195 | 26641819 | 56625  | 2  | 0 | 9  | 0 | 0.00926608 | 1 | 15 | 0.30102999 | 1.13004284 |
| chr4 | 26641819 | 26675431 | 33613  | 1  | 0 | 8  | 0 | 0.01767679 | 1 | 13 | 0.30102999 | 0.91308053 |
| chr4 | 26675431 | 26756765 | 81335  | 2  | 0 | 8  | 0 | 0.03209037 | 1 | 12 | 0.30102999 | 0.72109894 |
| chr4 | 26756765 | 26865330 | 108566 | 2  | 0 | 8  | 0 | 0.13872638 | 1 | 9  | 0.30102999 | 0.30102999 |
| chr4 | 26865330 | 26921275 | 55946  | 1  | 0 | 8  | 0 | 0.20764654 | 1 | 8  | 0.30102999 | 0.20764654 |
| chr4 | 26921275 | 26959278 | 38004  | 1  | 0 | 7  | 0 | 0.13499366 | 1 | 8  | 0.30102999 | 0.30102999 |
| chr4 | 26959278 | 26959337 | 60     | 1  | 0 | 7  | 0 | 0.08584816 | 1 | 9  | 0.30102999 | 0.42015402 |
| chr4 | 26959337 | 27025347 | 66011  | 1  | 0 | 7  | 0 | 0.20469099 | 1 | 7  | 0.30102999 | 0.20469099 |
| chr4 | 27025347 | 27269113 | 243767 | 4  | 0 | 8  | 0 | 0.30102999 | 1 | 7  | 0.30102999 | 0.13499366 |
| chr4 | 27269113 | 27574902 | 305790 | 2  | 0 | 5  | 0 | 0.19510895 | 1 | 5  | 0.30102999 | 0.19510895 |
| chr4 | 27574902 | 27574961 | 60     | 1  | 0 | 7  | 0 | 0.20469099 | 1 | 7  | 0.30102999 | 0          |

|      |          |          |        |    |   |   |            |            |   |    |            |            |
|------|----------|----------|--------|----|---|---|------------|------------|---|----|------------|------------|
| chr4 | 33617563 | 34033992 | 416430 | 3  | 0 | 0 | 0          | 0          | 1 | 2  | 0.30102999 | 0.61140001 |
| chr4 | 34033992 | 34106870 | 72879  | 2  | 0 | 0 | 0          | 0          | 1 | 4  | 0.30102999 | 1.26272838 |
| chr4 | 34106870 | 34260744 | 153875 | 3  | 0 | 0 | 0          | 0          | 1 | 5  | 0.30102999 | 1.60515106 |
| chr4 | 34260744 | 34833500 | 572757 | 3  | 0 | 0 | 0          | 0          | 1 | 2  | 0.30102999 | 0.61140001 |
| chr4 | 34833500 | 35303722 | 470223 | 5  | 0 | 0 | 0          | 0          | 1 | 3  | 0.30102999 | 0.93173516 |
| chr4 | 35303722 | 35485786 | 182065 | 2  | 0 | 2 | 0          | 0.08289118 | 1 | 3  | 0.30102999 | 0.30102999 |
| chr4 | 35485786 | 35698021 | 212236 | 2  | 0 | 4 | 0          | 0.18734596 | 1 | 2  | 0.30102999 | 0.18734596 |
| chr4 | 35698021 | 35935924 | 237904 | 2  | 0 | 4 | 0          | 0.11390336 | 1 | 5  | 0.30102999 | 0.30102999 |
| chr4 | 35935924 | 35935983 | 60     | 1  | 0 | 6 | 0          | 0.20064824 | 1 | 6  | 0.30102999 | 0.20064824 |
| chr4 | 35935983 | 36093572 | 157590 | 3  | 0 | 5 | 0          | 0.30102999 | 1 | 4  | 0.30102999 | 0.11390336 |
| chr4 | 36093572 | 36093631 | 60     | 1  | 0 | 6 | 0          | 0.30102999 | 1 | 5  | 0.30102999 | 0.12309572 |
| chr4 | 36093631 | 36272268 | 178638 | 5  | 0 | 6 | 0          | 0.63695542 | 1 | 3  | 0.30102999 | 0.03070643 |
| chr4 | 36272268 | 36272327 | 60     | 1  | 0 | 7 | 0          | 0.20469099 | 1 | 7  | 0.30102999 | 0.20469099 |
| chr4 | 36272327 | 36434278 | 161952 | 2  | 0 | 7 | 0          | 0.43181735 | 1 | 5  | 0.30102999 | 0.07511598 |
| chr4 | 36434278 | 36434337 | 60     | 1  | 0 | 8 | 0          | 0.20764654 | 1 | 8  | 0.30102999 | 0.20764654 |
| chr4 | 36434337 | 36593341 | 159005 | 2  | 0 | 7 | 0          | 0.13499966 | 1 | 8  | 0.30102999 | 0.30102999 |
| chr4 | 36593341 | 36833002 | 239662 | 3  | 0 | 7 | 0          | 0.01667721 | 1 | 12 | 0.30102999 | 0.92532268 |
| chr4 | 36833002 | 37114858 | 281857 | 1  | 0 | 6 | 0          | 0.02793176 | 1 | 10 | 0.30102999 | 0.74627054 |
| chr4 | 37114858 | 37236591 | 121734 | 1  | 0 | 4 | 0          | 0          | 1 | 9  | 0.30102999 | 1.01542894 |
| chr4 | 37236591 | 37300587 | 63997  | 2  | 1 | 4 | 0.1218695  | 0.01077081 | 1 | 9  | 0.1218695  | 1.01542894 |
| chr4 | 37300587 | 37300646 | 60     | 1  | 1 | 4 | 0.1218695  | 0.00530918 | 1 | 10 | 0.1218695  | 1.2568129  |
| chr4 | 37300646 | 37455978 | 155333 | 4  | 1 | 3 | 0.1218695  | 0.00378107 | 1 | 9  | 0.1218695  | 1.33111237 |
| chr4 | 37455978 | 37456037 | 60     | 1  | 1 | 3 | 0.1218695  | 0.00170588 | 1 | 10 | 0.1218695  | 1.61091002 |
| chr4 | 37456037 | 37559630 | 103694 | 2  | 1 | 3 | 0.1218695  | 0.01598258 | 1 | 7  | 0.1218695  | 0.84395715 |
| chr4 | 37559630 | 37590493 | 30654  | 2  | 1 | 3 | 0.1218695  | 0.00170588 | 1 | 10 | 0.1218695  | 1.61091002 |
| chr4 | 37590493 | 37684725 | 94233  | 2  | 0 | 3 | 0.1218695  | 0.0079614  | 1 | 8  | 0.30102999 | 1.07548421 |
| chr4 | 37684725 | 37684784 | 60     | 1  | 1 | 3 | 0.1218695  | 0.0079614  | 1 | 8  | 0.1218695  | 1.07548421 |
| chr4 | 37684784 | 37726834 | 42051  | 1  | 2 | 2 | 0.1218695  | 0.00221948 | 1 | 8  | 0.1218695  | 1.44210395 |
| chr4 | 37726834 | 37836222 | 109389 | 1  | 0 | 2 | 0.1218695  | 0.00221948 | 1 | 8  | 0.30102999 | 1.44210395 |
| chr4 | 37836222 | 37850275 | 14054  | 2  | 0 | 3 | 0.1218695  | 7.28E-04   | 1 | 11 | 0.30102999 | 1.91540774 |
| chr4 | 37850275 | 37911055 | 60781  | 1  | 0 | 2 | 0.1218695  | 0.00221948 | 1 | 8  | 0.30102999 | 1.44210395 |
| chr4 | 37911055 | 37953144 | 42090  | 2  | 1 | 2 | 0.1218695  | 0.00221948 | 1 | 8  | 0.1218695  | 1.44210395 |
| chr4 | 37953144 | 37953203 | 60     | 1  | 1 | 3 | 0.1218695  | 0.0079614  | 1 | 8  | 0.1218695  | 1.07548421 |
| chr4 | 37953203 | 38029393 | 76191  | 2  | 0 | 3 | 0.1218695  | 0.01598258 | 1 | 7  | 0.30102999 | 0.84395715 |
| chr4 | 38029393 | 38074093 | 44701  | 2  | 2 | 3 | 0.30102999 | 0.00378107 | 1 | 9  | 0.05404976 | 1.33111237 |
| chr4 | 38074093 | 38211375 | 137283 | 3  | 0 | 3 | 0.30102999 | 0.0079614  | 1 | 8  | 0.05404976 | 1.07548421 |
| chr4 | 38211375 | 38211434 | 60     | 1  | 2 | 3 | 0.30102999 | 0.00378107 | 1 | 9  | 0.05404976 | 1.33111237 |
| chr4 | 38211434 | 38290242 | 78809  | 2  | 0 | 2 | 0.30102999 | 9.54E-04   | 1 | 9  | 0.05404976 | 1.74076927 |
| chr4 | 38290242 | 38290301 | 60     | 1  | 2 | 2 | 0.30102999 | 3.90E-04   | 1 | 10 | 0.05404976 | 2.0620585  |
| chr4 | 38290301 | 38452743 | 162443 | 1  | 0 | 2 | 0.30102999 | 9.54E-04   | 1 | 9  | 0.30102999 | 1.74076927 |
| chr4 | 38452743 | 38512216 | 59474  | 2  | 1 | 2 | 0.1218695  | 9.54E-04   | 1 | 9  | 0.1218695  | 1.74076927 |
| chr4 | 38512216 | 38626231 | 114016 | 2  | 1 | 1 | 0.1218695  | 1.30E-04   | 1 | 9  | 0.1218695  | 2.29264207 |
| chr4 | 38626231 | 38626290 | 60     | 1  | 4 | 4 | 0.1218695  | 0.01077081 | 1 | 9  | 0.1218695  | 1.01542894 |
| chr4 | 38626290 | 38683980 | 57691  | 2  | 1 | 1 | 0.1218695  | 1.30E-04   | 1 | 9  | 0.1218695  | 2.29264207 |
| chr4 | 38683980 | 38684039 | 60     | 1  | 1 | 4 | 0.1218695  | 0.01077081 | 1 | 9  | 0.1218695  | 1.01542894 |
| chr4 | 38684039 | 38730524 | 46486  | 1  | 1 | 3 | 0.1218695  | 0.00378107 | 1 | 9  | 0.1218695  | 1.33111237 |
| chr4 | 38730524 | 38879793 | 149270 | 5  | 1 | 2 | 0.1218695  | 9.54E-04   | 1 | 9  | 0.1218695  | 1.74076927 |
| chr4 | 38879793 | 38926934 | 47142  | 1  | 1 | 1 | 0.1218695  | 1.30E-04   | 1 | 9  | 0.1218695  | 2.29264207 |
| chr4 | 38926934 | 38968751 | 41818  | 2  | 1 | 2 | 0.1218695  | 9.54E-04   | 1 | 9  | 0.1218695  | 1.74076927 |
| chr4 | 38968751 | 39021117 | 52367  | 2  | 1 | 4 | 0.1218695  | 0.01077081 | 1 | 9  | 0.1218695  | 1.01542894 |
| chr4 | 39021117 | 39021176 | 60     | 1  | 1 | 5 | 0.1218695  | 0.00666883 | 1 | 11 | 0.1218695  | 1.20557689 |
| chr4 | 39021176 | 39090404 | 69229  | 1  | 1 | 5 | 0.1218695  | 0.01320236 | 1 | 10 | 0.1218695  | 0.97390707 |
| chr4 | 39090404 | 39160988 | 70585  | 2  | 1 | 5 | 0.1218695  | 0.02473314 | 1 | 9  | 0.1218695  | 0.76806864 |
| chr4 | 39160988 | 39219586 | 58599  | 2  | 1 | 5 | 0.1218695  | 0.01320236 | 1 | 10 | 0.1218695  | 0.97390707 |
| chr4 | 39219586 | 39276568 | 56983  | 3  | 1 | 5 | 0.1218695  | 0.00666883 | 1 | 11 | 0.1218695  | 1.20557689 |
| chr4 | 39276568 | 39552971 | 276404 | 10 | 1 | 5 | 0.1218695  | 0.00317045 | 1 | 12 | 0.1218695  | 1.46403142 |
| chr4 | 39552971 | 39619343 | 66373  | 3  | 1 | 5 | 0.1218695  | 0.00141024 | 1 | 13 | 0.1218695  | 1.7506523  |
| chr4 | 39619343 | 39698881 | 79539  | 2  | 1 | 3 | 0.1218695  | 2.93E-04   | 1 | 12 | 0.1218695  | 2.24595916 |
| chr4 | 39698881 | 39750115 | 51235  | 1  | 5 | 5 | 0.1218695  | 0.00141024 | 1 | 13 | 0.1218695  | 1.7506523  |
| chr4 | 39750115 | 39781062 | 30948  | 1  | 1 | 4 | 0.1218695  | 4.45E-04   | 1 | 13 | 0.1218695  | 2.13824703 |
| chr4 | 39781062 | 39942183 | 161122 | 4  | 1 | 4 | 0.30102999 | 4.45E-04   | 1 | 13 | 0          | 2.13824703 |
| chr4 | 39942183 | 40027878 | 85696  | 3  | 2 | 4 | 0.61140001 | 4.45E-04   | 0 | 13 | 0          | 2.13824703 |
| chr4 | 40027878 | 40121747 | 93870  | 3  | 2 | 5 | 0.61140001 | 0.00141024 | 0 | 13 | 0          | 1.7506523  |
| chr4 | 40121747 | 40153440 | 31694  | 2  | 6 | 6 | 0.61140001 | 0.00379523 | 0 | 13 | 0          | 1.42397267 |
| chr4 | 40153440 | 40183332 | 38993  | 1  | 2 | 6 | 0.61140001 | 0.01518174 | 0 | 11 | 0          | 0.94496891 |
| chr4 | 40183332 | 40232988 | 49667  | 4  | 2 | 6 | 0.61140001 | 0.00778066 | 0 | 12 | 0          | 1.70389921 |
| chr4 | 40232988 | 40348687 | 109390 | 2  | 2 | 5 | 0.61140001 | 0.00666883 | 0 | 11 | 0          | 1.20557689 |
| chr4 | 40348687 | 40379060 | 30374  | 1  | 2 | 4 | 0.61140001 | 0.00247414 | 0 | 11 | 0          | 1.52371709 |
| chr4 | 40379060 | 40430483 | 51424  | 2  | 2 | 4 | 0.61140001 | 0.00666883 | 0 | 11 | 0          | 1.20557689 |
| chr4 | 40430483 | 40513326 | 82844  | 2  | 2 | 4 | 0.61140001 | 0.00247414 | 0 | 11 | 0          | 1.52371709 |
| chr4 | 40513326 | 40588332 | 75007  | 3  | 2 | 5 | 0.61140001 | 0.00666883 | 0 | 11 | 0          | 1.20557689 |
| chr4 | 40588332 | 40629327 | 40996  | 1  | 2 | 4 | 0.61140001 | 0.00247414 | 0 | 11 | 0          | 1.52371709 |
| chr4 | 40629327 | 40748354 | 119028 | 1  | 1 | 4 | 0.30102999 | 0.00247414 | 0 | 11 | 0          | 1.52371709 |
| chr4 | 40748354 | 40937135 | 188782 | 7  | 1 | 5 | 0.30102999 | 0.00666883 | 0 | 11 | 0          | 1.20557689 |
| chr4 | 40937135 | 41016268 | 79134  | 2  | 1 | 5 | 0.30102999 | 0.01320236 | 0 | 10 | 0          | 0.97390707 |
| chr4 | 41016268 | 41087376 | 71109  | 2  | 1 | 5 | 0.30102999 | 0.02473314 | 0 | 9  | 0          | 0.76806864 |
| chr4 | 41087376 | 41156822 | 69447  | 1  | 1 | 5 | 0.30102999 | 0.04407651 | 0 | 8  | 0          | 0.58747015 |
| chr4 | 41156822 | 41188018 | 31197  | 2  | 1 | 5 | 0.30102999 | 0.02473314 | 0 | 9  | 0          | 0.76806864 |
| chr4 | 41188018 | 41188077 | 60     | 1  | 1 | 5 | 0.30102999 | 0.01320236 | 0 | 10 | 0          | 0.97390707 |
| chr4 | 41188077 | 41229854 | 41778  | 1  | 1 | 5 | 0.30102999 | 0.02473314 | 0 | 9  | 0          | 0.76806864 |
| chr4 | 41229854 | 41299928 | 70075  | 3  | 1 | 5 | 0.30102999 | 0.04407651 | 0 | 8  | 0          | 0.58747015 |
| chr4 | 41299928 | 41368384 | 68457  | 1  | 1 | 4 | 0.30102999 | 0.03812622 | 0 | 7  | 0          | 0.60763643 |
| chr4 | 41368384 | 41444356 | 75973  | 1  | 1 | 3 | 0.30102999 | 0.01598258 | 0 | 7  | 0          | 0.84395715 |
| chr4 | 41444356 | 41531279 | 86924  | 3  | 1 | 4 | 0.30102999 | 0.02074938 | 0 | 8  | 0          | 0.79906872 |
| chr4 | 41531279 | 41574063 | 42785  | 2  | 1 | 4 | 0.30102999 | 0.01077081 | 0 | 9  | 0          | 1.01542894 |
| chr4 | 41574063 | 41618637 | 44575  | 1  | 1 | 4 | 0.30102999 | 0.02074938 | 0 | 8  | 0          | 0.79906872 |
| chr4 | 41618637 | 41652135 | 33499  | 1  | 0 | 4 | 0.30102999 | 0.02074938 | 0 | 8  | 0          | 0.79906872 |
| chr4 | 41652135 | 41748674 | 96540  | 3  | 0 | 4 | 0.30102999 | 0.01077081 | 0 | 9  | 0          | 1.01542894 |
| chr4 | 41748674 | 41779782 | 31109  | 2  | 0 | 4 | 0.30102999 | 0.01077081 | 0 | 9  | 0          | 1.01542894 |
| chr4 | 41779782 | 41856258 | 76477  | 1  | 0 | 4 | 0.30102999 | 0.03812622 | 0 | 7  | 0          | 0.60763643 |
| chr4 | 41856258 | 41956926 | 106669 | 1  | 0 | 4 | 0.30102999 | 0.03812622 | 0 | 7  | 0          | 0.60763643 |
| chr4 | 41956926 | 41995541 | 38616  | 2  | 0 | 4 | 0.30102999 | 0.02074938 | 0 | 8  | 0          | 0.79906872 |
| chr4 | 41995541 | 42028806 | 33266  | 2  | 0 | 4 | 0.30102999 | 0.01077081 | 0 | 9  | 0          | 1.01542894 |
| chr4 | 42028806 | 42028865 | 60     | 1  | 1 | 4 | 0.30102999 | 0.01077081 | 0 | 9  | 0          | 1.015428   |

|      |          |          |        |    |   |   |            |             |   |            |            |            |
|------|----------|----------|--------|----|---|---|------------|-------------|---|------------|------------|------------|
| chr4 | 44771097 | 44771156 | 60     | 1  | 1 | 5 | 0.05404976 | 0.02473314  | 2 | 9          | 0.30102999 | 0.76806864 |
| chr4 | 44771156 | 44850644 | 79489  | 1  | 1 | 3 | 0.05404976 | 0.0079614   | 2 | 8          | 0.30102999 | 1.07548421 |
| chr4 | 44850644 | 45106338 | 255693 | 1  | 2 | 2 | 0.05404976 | 0.00493743  | 2 | 7          | 0.30102999 | 1.16581773 |
| chr4 | 45106338 | 45106397 | 60     | 1  | 1 | 3 | 0.05404976 | 0.0079614   | 2 | 8          | 0.30102999 | 1.07548421 |
| chr4 | 45106397 | 45254680 | 148284 | 1  | 1 | 3 | 0.05404976 | 0.01598258  | 2 | 7          | 0.30102999 | 0.84395715 |
| chr4 | 45254680 | 45376149 | 121470 | 1  | 1 | 4 | 0.05404976 | 0.03812622  | 2 | 7          | 0.30102999 | 0.60763643 |
| chr4 | 45376149 | 45518972 | 142824 | 2  | 1 | 4 | 0.05404976 | 0.06713722  | 2 | 6          | 0.30102999 | 0.44141547 |
| chr4 | 45518972 | 45755051 | 236080 | 1  | 1 | 2 | 0.05404976 | 0.02162467  | 2 | 5          | 0.30102999 | 0.68214471 |
| chr4 | 45755051 | 45847432 | 92382  | 1  | 1 | 2 | 0.1218695  | 0.02162467  | 1 | 5          | 0.1218695  | 0.68214471 |
| chr4 | 45847432 | 45847491 | 60     | 1  | 1 | 4 | 0.1218695  | 0.11390336  | 1 | 5          | 0.1218695  | 0.30102999 |
| chr4 | 45847491 | 46033652 | 186162 | 1  | 0 | 4 | 0          | 0.11390336  | 1 | 5          | 0.30102999 | 0.30102999 |
| chr4 | 46033652 | 46456211 | 422560 | 11 | 0 | 4 | 0          | 0.06713722  | 1 | 6          | 0.30102999 | 0.44141547 |
| chr4 | 46456211 | 46580693 | 124483 | 2  | 0 | 4 | 0          | 0.06713722  | 2 | 6          | 0.61140001 | 0.44141547 |
| chr4 | 46580693 | 46731529 | 150837 | 2  | 0 | 4 | 0          | 0.06713722  | 3 | 6          | 0.93173516 | 0.44141547 |
| chr4 | 46731529 | 46731588 | 60     | 1  | 0 | 5 | 0          | 0.12309572  | 3 | 6          | 0.30102999 | 0.30102999 |
| chr4 | 46731588 | 46877670 | 146083 | 3  | 0 | 4 | 0          | 0.06713722  | 3 | 6          | 0.93173516 | 0.44141547 |
| chr4 | 46877670 | 46911136 | 33467  | 2  | 0 | 6 | 0          | 0.20064824  | 3 | 6          | 0.93173516 | 0.20064824 |
| chr4 | 46911136 | 46966676 | 55541  | 1  | 0 | 5 | 0          | 0.12309572  | 3 | 6          | 0.93173516 | 0.30102999 |
| chr4 | 46966676 | 46994955 | 28280  | 3  | 1 | 5 | 0.02438896 | 0.12309572  | 3 | 6          | 0.51676182 | 0.30102999 |
| chr4 | 46994955 | 47035150 | 40196  | 1  | 1 | 4 | 0.02438896 | 0.11390336  | 3 | 5          | 0.51676182 | 0.30102999 |
| chr4 | 47035150 | 47163305 | 128156 | 2  | 0 | 4 | 0          | 0           | 5 | 0.93173516 | 0.30102999 |            |
| chr4 | 47163305 | 47175904 | 11790  | 2  | 0 | 5 | 0          | 0.19510895  | 3 | 5          | 0.19510895 | 0.19510895 |
| chr4 | 47175904 | 52711931 | 22831  | 2  | 2 | 1 | 0.08289318 | 0.05404976  | 2 | 3          | 0.30102999 | 0.30102999 |
| chr4 | 52711931 | 52711990 | 60     | 1  | 1 | 2 | 0.10153319 | 0.01091641  | 1 | 6          | 0.91219088 | 0.76005302 |
| chr4 | 52711990 | 52734955 | 31966  | 1  | 2 | 1 | 0.10153319 | 0.05404976  | 2 | 6          | 0.91219088 | 0.30102999 |
| chr4 | 52734955 | 52859933 | 115979 | 3  | 2 | 1 | 0.00493743 | 0.05404976  | 7 | 2          | 1.16581773 | 0.30102999 |
| chr4 | 52859933 | 52893117 | 31385  | 2  | 2 | 1 | 0.00493743 | 0.01091641  | 7 | 4          | 1.16581773 | 0.76005302 |
| chr4 | 52893117 | 52944500 | 51384  | 2  | 1 | 2 | 0.00493743 | 0.02438896  | 7 | 3          | 1.16581773 | 0.51676182 |
| chr4 | 52944500 | 53025164 | 80665  | 4  | 2 | 1 | 0.00493743 | 0.01091641  | 7 | 4          | 1.16581773 | 0.76005302 |
| chr4 | 53025164 | 53294292 | 269129 | 5  | 2 | 2 | 0.00493743 | 0.0429175   | 7 | 4          | 1.16581773 | 0.47744371 |
| chr4 | 53294292 | 53294351 | 60     | 1  | 2 | 2 | 0.00493743 | 0.02162467  | 7 | 5          | 1.16581773 | 0.68214471 |
| chr4 | 53294351 | 53416699 | 122349 | 2  | 2 | 2 | 0.00493743 | 0.0429175   | 7 | 4          | 1.16581773 | 0.47744371 |
| chr4 | 53416699 | 53705275 | 288577 | 8  | 2 | 2 | 0.00493743 | 0.02162467  | 7 | 5          | 1.16581773 | 0.68214471 |
| chr4 | 53705275 | 53729457 | 24183  | 2  | 2 | 2 | 0.00221948 | 0.02162467  | 8 | 5          | 1.44210395 | 0.68214471 |
| chr4 | 53729457 | 54060909 | 331453 | 11 | 3 | 2 | 0.0079614  | 0.02162467  | 8 | 5          | 1.07548421 | 0.68214471 |
| chr4 | 54060909 | 54134010 | 73102  | 2  | 2 | 2 | 0.00221948 | 0.02162467  | 8 | 5          | 1.44210395 | 0.68214471 |
| chr4 | 54134010 | 54218619 | 84610  | 2  | 2 | 2 | 0.00221948 | 0.0429175   | 8 | 4          | 1.44210395 | 0.47744371 |
| chr4 | 54218619 | 54373639 | 155021 | 5  | 2 | 2 | 0.00221948 | 0.02162467  | 8 | 5          | 1.44210395 | 0.68214471 |
| chr4 | 54373639 | 54766075 | 392437 | 6  | 2 | 2 | 0.00221948 | 0.0429175   | 8 | 4          | 1.44210395 | 0.47744371 |
| chr4 | 54766075 | 55048646 | 282572 | 9  | 2 | 2 | 0.00221948 | 0.08289318  | 8 | 3          | 1.44210395 | 0.30102999 |
| chr4 | 55048646 | 55048705 | 60     | 1  | 2 | 2 | 0.00221948 | 0.0429175   | 8 | 4          | 1.44210395 | 0.47744371 |
| chr4 | 55048705 | 55179152 | 130448 | 4  | 2 | 2 | 0.00221948 | 0.08289318  | 8 | 3          | 1.44210395 | 0.30102999 |
| chr4 | 55179152 | 55179211 | 60     | 1  | 2 | 2 | 0.00221948 | 0.0429175   | 8 | 4          | 1.44210395 | 0.47744371 |
| chr4 | 55179211 | 55252228 | 73018  | 1  | 2 | 2 | 0.00493743 | 0.0429175   | 7 | 4          | 1.16581773 | 0.47744371 |
| chr4 | 55252228 | 55252287 | 60     | 1  | 2 | 2 | 0.00493743 | 0.02162467  | 7 | 5          | 1.16581773 | 0.68214471 |
| chr4 | 55252287 | 55409467 | 157181 | 1  | 2 | 2 | 0.00493743 | 0.0429175   | 7 | 4          | 1.16581773 | 0.47744371 |
| chr4 | 55409467 | 55532008 | 122542 | 1  | 2 | 2 | 0.02162467 | 0.0429175   | 5 | 4          | 0.68214471 | 0.47744371 |
| chr4 | 55532008 | 55593629 | 61622  | 3  | 2 | 3 | 0.02162467 | 0.10122019  | 5 | 4          | 0.68214471 | 0.30102999 |
| chr4 | 55593629 | 55606492 | 12864  | 2  | 3 | 3 | 0.02162467 | 0.05670724  | 5 | 5          | 0.68214471 | 0.45545077 |
| chr4 | 55606492 | 55759075 | 152584 | 1  | 2 | 3 | 0.02162467 | 0.10122019  | 5 | 4          | 0.68214471 | 0.30102999 |
| chr4 | 55759075 | 55759134 | 60     | 1  | 2 | 3 | 0.00493743 | 0.10122019  | 7 | 4          | 1.16581773 | 0.30102999 |
| chr4 | 55759134 | 55879220 | 120087 | 1  | 2 | 3 | 0.10153319 | 0.10122019  | 4 | 4          | 0.91219088 | 0.30102999 |
| chr4 | 55879220 | 55980398 | 101179 | 2  | 3 | 3 | 0.0429175  | 0.10122019  | 4 | 4          | 0.47744371 | 0.30102999 |
| chr4 | 55980398 | 56016702 | 36305  | 2  | 2 | 3 | 0.10153319 | 0.10122019  | 6 | 4          | 0.91219088 | 0.30102999 |
| chr4 | 56016702 | 56154217 | 137516 | 1  | 1 | 3 | 0.00204627 | 0.10122019  | 6 | 4          | 1.31360226 | 0.30102999 |
| chr4 | 56154217 | 56218849 | 64633  | 2  | 1 | 3 | 0.00478973 | 0.17593012  | 5 | 3          | 1.02643191 | 0.17593012 |
| chr4 | 56218849 | 56265560 | 46712  | 1  | 1 | 3 | 0.01091641 | 0.17593012  | 4 | 3          | 0.76005302 | 0.17593012 |
| chr4 | 56265560 | 56294580 | 29021  | 2  | 1 | 3 | 0.00478973 | 0.10122019  | 5 | 4          | 1.02643191 | 0.30102999 |
| chr4 | 56294580 | 56294639 | 60     | 1  | 1 | 3 | 3.39E-04   | 0.10122019  | 8 | 4          | 1.94674965 | 0.30102999 |
| chr4 | 56294639 | 56369907 | 75269  | 2  | 1 | 3 | 8.47E-04   | 0.10122019  | 7 | 4          | 1.62048027 | 0.30102999 |
| chr4 | 56369907 | 56500620 | 130714 | 7  | 1 | 4 | 3.39E-04   | 0.11390336  | 5 | 5          | 1.94674965 | 0.30102999 |
| chr4 | 56500620 | 56629617 | 128998 | 1  | 1 | 3 | 0.00478973 | 0.05670724  | 5 | 5          | 1.02643191 | 0.45545077 |
| chr4 | 56629617 | 56697858 | 68242  | 1  | 3 | 3 | 0.00478973 | 0.10122019  | 5 | 4          | 1.02643191 | 0.30102999 |
| chr4 | 56697858 | 56885547 | 187690 | 6  | 1 | 3 | 0.00204627 | 0.10122019  | 6 | 4          | 1.31360226 | 0.30102999 |
| chr4 | 56885547 | 56946386 | 60840  | 1  | 1 | 3 | 8.47E-04   | 0.10122019  | 7 | 4          | 1.62048027 | 0.30102999 |
| chr4 | 56946386 | 56946445 | 60     | 1  | 3 | 3 | 8.47E-04   | 0.03070643  | 6 | 6          | 1.62048027 | 0.63695542 |
| chr4 | 56946445 | 56986699 | 40255  | 1  | 1 | 3 | 8.47E-04   | 0.05670724  | 7 | 7          | 1.62048027 | 0.45545077 |
| chr4 | 56986699 | 57082664 | 95966  | 2  | 3 | 3 | 0.00221948 | 0.05670724  | 8 | 5          | 1.44210395 | 0.45545077 |
| chr4 | 57082664 | 57110994 | 28331  | 2  | 3 | 2 | 9.54E-04   | 0.05670724  | 7 | 5          | 1.74076927 | 0.45545077 |
| chr4 | 57110994 | 57194063 | 83070  | 2  | 3 | 3 | 9.54E-04   | 0.10122019  | 9 | 4          | 1.74076927 | 0.30102999 |
| chr4 | 57194063 | 57194122 | 60     | 1  | 3 | 3 | 0.00378107 | 0.10122019  | 9 | 4          | 1.33111237 | 0.30102999 |
| chr4 | 57194122 | 57248082 | 53961  | 1  | 3 | 3 | 0.00378107 | 0.17593012  | 9 | 3          | 1.33111237 | 0.17593012 |
| chr4 | 57248082 | 57280535 | 32454  | 1  | 3 | 3 | 9.54E-04   | 0.17593012  | 9 | 3          | 1.74076927 | 0.17593012 |
| chr4 | 57280535 | 57309910 | 29376  | 2  | 2 | 3 | 9.54E-04   | 0.10122019  | 4 | 4          | 1.74076927 | 0.30102999 |
| chr4 | 57309910 | 57309969 | 60     | 1  | 2 | 3 | 9.54E-04   | 0.05670724  | 5 | 5          | 1.74076927 | 0.45545077 |
| chr4 | 57309969 | 57395445 | 85477  | 2  | 2 | 3 | 0.00221948 | 0.05670724  | 8 | 5          | 1.44210395 | 0.45545077 |
| chr4 | 57395445 | 57395504 | 60     | 1  | 2 | 3 | 9.54E-04   | 0.05670724  | 9 | 5          | 1.74076927 | 0.45545077 |
| chr4 | 57395504 | 57514428 | 118925 | 1  | 2 | 1 | 0.00221948 | 0.01091641  | 8 | 4          | 1.44210395 | 0.76005302 |
| chr4 | 57514428 | 57544216 | 29789  | 2  | 2 | 1 | 9.54E-04   | 0.01091641  | 9 | 4          | 1.74076927 | 0.30102999 |
| chr4 | 57544216 | 57640757 | 95642  | 1  | 1 | 1 | 0.00493743 | 0.01091641  | 7 | 4          | 1.16581773 | 0.76005302 |
| chr4 | 57640757 | 57680620 | 39864  | 3  | 2 | 3 | 0.00493743 | 0.10122019  | 7 | 4          | 1.16581773 | 0.30102999 |
| chr4 | 57680620 | 57829686 | 149067 | 4  | 1 | 1 | 0.00204627 | 0.01091641  | 6 | 4          | 1.31360226 | 0.76005302 |
| chr4 | 57829686 | 57842295 | 12610  | 3  | 1 | 3 | 0.00204627 | 0.10122019  | 6 | 4          | 1.31360226 | 0.30102999 |
| chr4 | 57842295 | 57916058 | 73764  | 3  | 1 | 2 | 0.00204627 | 0.0429175   | 6 | 4          | 1.31360226 | 0.47744371 |
| chr4 | 57916058 | 57958486 | 42429  | 2  | 1 | 2 | 0.00204627 | 0.08289318  | 6 | 3          | 1.31360226 | 0.30102999 |
| chr4 | 57958486 | 57973903 | 15418  | 1  | 2 | 2 | 8.47E-04   | 0.0429175   | 7 | 4          | 1.62048027 | 0.47744371 |
| chr4 | 57973903 | 58183131 | 209229 | 2  | 1 | 0 | 8.47E-04   | 0.162048027 | 7 | 4          | 1.62048027 | 1.26272838 |
| chr4 | 58183131 | 58183190 | 60     | 1  | 2 | 0 | 0.00493743 | 0           | 7 | 4          | 1.16581773 | 1.26272838 |
| chr4 | 58183190 | 58329324 | 146135 | 0  | 1 | 0 | 0          | 0           | 6 | 4          | 1.95986592 | 1.26272838 |
| chr4 | 58329324 | 58365361 | 36038  | 2  | 0 | 0 | 0          | 0           | 6 | 5          | 1.95986592 | 1.60515106 |
| chr4 | 58365361 | 58365420 | 60     | 1  | 1 | 0 | 0.00204627 | 0           | 6 | 5          | 1.31360226 | 1.60515106 |
| chr4 |          |          |        |    |   |   |            |             |   |            |            |            |



|      |          |          |        |    |   |   |            |            |   |   |            |            |
|------|----------|----------|--------|----|---|---|------------|------------|---|---|------------|------------|
| chr4 | 66966827 | 66966886 | 60     | 1  | 0 | 2 | 0          | 0.1575501  | 3 | 2 | 0.93173516 | 0.1575501  |
| chr4 | 66966886 | 67129288 | 162403 | 2  | 0 | 0 | 0          | 0          | 0 | 1 | 0.93173516 | 0.30102999 |
| chr4 | 67129288 | 67189303 | 60016  | 3  | 0 | 0 | 0          | 0          | 3 | 2 | 0.93173516 | 0.61140001 |
| chr4 | 67189303 | 67346550 | 157248 | 1  | 0 | 0 | 0          | 0          | 2 | 1 | 0.61140001 | 0.30102999 |
| chr4 | 67346550 | 67346609 | 60     | 1  | 0 | 1 | 0          | 0.1218695  | 2 | 1 | 0.61140001 | 0.1218695  |
| chr4 | 67346609 | 67433365 | 396757 | 2  | 0 | 0 | 0          | 0          | 0 | 0 | 0.61140001 | 0          |
| chr4 | 67433365 | 67743424 | 60     | 1  | 0 | 2 | 0          | 0.08289318 | 3 | 3 | 0.93173516 | 0.30102999 |
| chr4 | 67743424 | 67958904 | 215481 | 1  | 0 | 2 | 0          | 0.1575501  | 3 | 2 | 0.93173516 | 0.1575501  |
| chr4 | 67958904 | 68193194 | 234291 | 1  | 0 | 2 | 0          | 0.30102999 | 3 | 1 | 0.93173516 | 0.05404976 |
| chr4 | 68193194 | 68193253 | 60     | 1  | 0 | 2 | 0          | 0.1575501  | 4 | 2 | 1.26272838 | 0.1575501  |
| chr4 | 68193253 | 68383183 | 189931 | 3  | 0 | 2 | 0          | 0.1575501  | 3 | 2 | 0.93173516 | 0.1575501  |
| chr4 | 68383183 | 68383242 | 60     | 1  | 0 | 2 | 0          | 0.1575501  | 4 | 2 | 1.26272838 | 0.1575501  |
| chr4 | 68383242 | 68912989 | 529748 | 14 | 0 | 2 | 0          | 0.1575501  | 3 | 2 | 0.93173516 | 0.1575501  |
| chr4 | 68912989 | 68946958 | 33970  | 2  | 0 | 3 | 0          | 0.17593012 | 3 | 3 | 0.93173516 | 0.17593012 |
| chr4 | 68946958 | 69092624 | 145667 | 4  | 0 | 3 | 0          | 0.30102999 | 3 | 2 | 0.93173516 | 0.08289318 |
| chr4 | 69092624 | 69198495 | 105872 | 4  | 0 | 4 | 0          | 0.47744371 | 3 | 2 | 0.93173516 | 0.0429175  |
| chr4 | 69198495 | 69213780 | 15286  | 2  | 0 | 4 | 0          | 0.47744371 | 4 | 2 | 1.26272838 | 0.0429175  |
| chr4 | 69213780 | 69402791 | 189012 | 1  | 0 | 2 | 0          | 0.1575501  | 3 | 2 | 0.93173516 | 0.1575501  |
| chr4 | 69402791 | 69402845 | 55     | 1  | 0 | 2 | 0          | 0.1575501  | 4 | 2 | 1.26272838 | 0.1575501  |
| chr4 | 69402845 | 69718248 | 315404 | 1  | 0 | 2 | 0          | 0.61140001 | 2 | 0 | 0.61140001 | 0          |
| chr4 | 69718248 | 69809232 | 90985  | 2  | 1 | 3 | 0.02438896 | 0.93173516 | 3 | 0 | 0.51676182 | 0          |
| chr4 | 69809232 | 69809291 | 60     | 1  | 1 | 2 | 0.00478973 | 0.93173516 | 5 | 0 | 1.02643191 | 0          |
| chr4 | 69809291 | 69897369 | 88079  | 1  | 1 | 2 | 0.00478973 | 0.61140001 | 5 | 0 | 1.02643191 | 0          |
| chr4 | 69897369 | 69961874 | 64506  | 1  | 1 | 2 | 0.01091641 | 0.61140001 | 4 | 0 | 0.76005302 | 0          |
| chr4 | 69961874 | 70014042 | 52189  | 2  | 1 | 2 | 0.01091641 | 0.30102999 | 4 | 1 | 0.76005302 | 0.05404976 |
| chr4 | 70014042 | 70014101 | 60     | 1  | 1 | 4 | 0.01091641 | 0.76005302 | 4 | 1 | 0.76005302 | 0.01091641 |
| chr4 | 70014101 | 70182118 | 168018 | 2  | 1 | 2 | 0.01091641 | 0.30102999 | 4 | 1 | 0.76005302 | 0.05404976 |
| chr4 | 70182118 | 70182177 | 60     | 1  | 1 | 3 | 0.01091641 | 0.17593012 | 3 | 0 | 0.76005302 | 0.17593012 |
| chr4 | 70182177 | 70304999 | 148323 | 1  | 1 | 3 | 0.01091641 | 0.30102999 | 4 | 1 | 0.76005302 | 0.05404976 |
| chr4 | 70304999 | 7030558  | 60     | 1  | 2 | 4 | 0.02162467 | 0.47744371 | 5 | 2 | 0.68214471 | 0.0429175  |
| chr4 | 7030558  | 70355326 | 24769  | 1  | 2 | 3 | 0.02162467 | 0.30102999 | 5 | 2 | 0.68214471 | 0.08289318 |
| chr4 | 70355326 | 70356682 | 1357   | 2  | 1 | 3 | 0.01053191 | 0.30102999 | 6 | 2 | 0.91219088 | 0.08289318 |
| chr4 | 70356682 | 70405132 | 48451  | 1  | 1 | 3 | 0.00204627 | 0.30102999 | 6 | 2 | 1.31360226 | 0.08289318 |
| chr4 | 70405132 | 70456773 | 51642  | 2  | 1 | 4 | 0.00204627 | 0.30102999 | 6 | 3 | 1.31360226 | 0.10122019 |
| chr4 | 70456773 | 70596245 | 139473 | 2  | 1 | 4 | 0.01091641 | 0.30102999 | 4 | 3 | 0.76005302 | 0.10122019 |
| chr4 | 70596245 | 70667736 | 71492  | 2  | 1 | 4 | 8.47E-04   | 0.30102999 | 7 | 3 | 1.62048027 | 0.10122019 |
| chr4 | 70667736 | 70667795 | 60     | 1  | 1 | 6 | 8.47E-04   | 0.63695542 | 7 | 3 | 1.62048027 | 0.03070643 |
| chr4 | 70667795 | 70797273 | 129479 | 1  | 6 | 6 | 0.00204627 | 0.63695542 | 6 | 3 | 1.31360226 | 0.03070643 |
| chr4 | 70797273 | 71070208 | 27936  | 9  | 1 | 5 | 0.00204627 | 0.45545077 | 6 | 3 | 1.31360226 | 0.05670724 |
| chr4 | 71070208 | 71230260 | 160053 | 6  | 1 | 6 | 0.00204627 | 0.63695542 | 6 | 3 | 1.31360226 | 0.03070643 |
| chr4 | 71230260 | 71251451 | 21192  | 1  | 1 | 5 | 0.00204627 | 0.45545077 | 6 | 3 | 1.31360226 | 0.05670724 |
| chr4 | 71251451 | 71251510 | 60     | 1  | 5 | 5 | 0.00204627 | 0.30102999 | 6 | 4 | 1.31360226 | 0.11390336 |
| chr4 | 71251510 | 71275265 | 23756  | 1  | 5 | 5 | 0.00204627 | 0.45545077 | 6 | 3 | 1.31360226 | 0.05670724 |
| chr4 | 71275265 | 71379309 | 104045 | 4  | 1 | 6 | 0.00204627 | 0.63695542 | 6 | 3 | 1.31360226 | 0.03070643 |
| chr4 | 71379309 | 71379368 | 60     | 1  | 1 | 6 | 0.00204627 | 0.44141547 | 6 | 4 | 1.31360226 | 0.06713722 |
| chr4 | 71379368 | 71472584 | 93217  | 2  | 1 | 6 | 0.00204627 | 0.63695542 | 6 | 3 | 1.31360226 | 0.03070643 |
| chr4 | 71472584 | 71472643 | 60     | 1  | 1 | 6 | 0.00204627 | 0.44141547 | 6 | 4 | 1.31360226 | 0.06713722 |
| chr4 | 71472643 | 71555968 | 83326  | 5  | 1 | 6 | 0.00204627 | 0.63695542 | 6 | 3 | 1.31360226 | 0.03070643 |
| chr4 | 71555968 | 71628262 | 72295  | 3  | 1 | 6 | 0.00204627 | 0.44141547 | 6 | 4 | 1.31360226 | 0.06713722 |
| chr4 | 71628262 | 71701939 | 73678  | 2  | 1 | 6 | 0.00204627 | 0.63695542 | 6 | 3 | 1.31360226 | 0.03070643 |
| chr4 | 71701939 | 71725250 | 23102  | 1  | 7 | 7 | 0.00204627 | 0.84395715 | 6 | 3 | 1.31360226 | 0.01598258 |
| chr4 | 71725250 | 71796651 | 71432  | 2  | 1 | 8 | 0.00204627 | 0.58747015 | 6 | 5 | 1.31360226 | 0.04407651 |
| chr4 | 71796651 | 71824777 | 28127  | 1  | 1 | 7 | 0.00204627 | 0.60763643 | 6 | 4 | 1.31360226 | 0.03812622 |
| chr4 | 71824777 | 71875751 | 50975  | 1  | 1 | 6 | 0.00204627 | 0.44141547 | 6 | 4 | 1.31360226 | 0.06713722 |
| chr4 | 71875751 | 71892429 | 16679  | 3  | 1 | 6 | 0.00204627 | 0.30102999 | 6 | 5 | 1.31360226 | 0.12309572 |
| chr4 | 71892429 | 72037455 | 145027 | 2  | 1 | 6 | 0.00204627 | 0.44141547 | 6 | 4 | 1.31360226 | 0.06713722 |
| chr4 | 72037455 | 72074858 | 37404  | 1  | 1 | 7 | 0.00204627 | 0.43181735 | 6 | 5 | 1.31360226 | 0.07511598 |
| chr4 | 72074858 | 72074917 | 60     | 1  | 1 | 7 | 0.00204627 | 0.30102999 | 6 | 6 | 1.31360226 | 0.1299913  |
| chr4 | 72074917 | 72150396 | 75480  | 1  | 6 | 6 | 0.00204627 | 0.63695542 | 6 | 3 | 1.31360226 | 0.03070643 |
| chr4 | 72150396 | 72150455 | 60     | 1  | 1 | 6 | 0.00204627 | 0.44141547 | 6 | 4 | 1.31360226 | 0.06713722 |
| chr4 | 72150455 | 72184996 | 34542  | 1  | 1 | 6 | 0.00204627 | 0.63695542 | 6 | 3 | 1.31360226 | 0.03070643 |
| chr4 | 72184996 | 72263311 | 78316  | 2  | 1 | 6 | 0.00478973 | 0.63695542 | 5 | 3 | 1.02643191 | 0.03070643 |
| chr4 | 72263311 | 72263364 | 54     | 1  | 1 | 7 | 0.00478973 | 0.84395715 | 5 | 3 | 1.02643191 | 0.01598258 |
| chr4 | 72263364 | 72386732 | 125369 | 3  | 1 | 6 | 0.00478973 | 0.63695542 | 5 | 3 | 1.02643191 | 0.03070643 |
| chr4 | 72386732 | 72693632 | 305901 | 6  | 1 | 6 | 0.00204627 | 0.63695542 | 6 | 3 | 1.31360226 | 0.03070643 |
| chr4 | 72693632 | 72852167 | 157536 | 1  | 6 | 6 | 0.00204627 | 0.63695542 | 6 | 3 | 1.02643191 | 0.03070643 |
| chr4 | 72852167 | 73013520 | 161354 | 4  | 1 | 5 | 0.00478973 | 0.45545077 | 5 | 3 | 1.02643191 | 0.05670724 |
| chr4 | 73013520 | 73075562 | 62043  | 1  | 1 | 5 | 0.01091641 | 0.45545077 | 5 | 3 | 0.76005302 | 0.05670724 |
| chr4 | 73075562 | 73227532 | 151971 | 3  | 1 | 4 | 0.01091641 | 0.68214471 | 4 | 2 | 0.76005302 | 0.02162467 |
| chr4 | 73227532 | 7330508  | 102977 | 2  | 1 | 4 | 0.02438896 | 0.47744371 | 3 | 2 | 0.51676182 | 0.0429175  |
| chr4 | 7330508  | 73373561 | 43054  | 2  | 1 | 4 | 0.02438896 | 0.30102999 | 3 | 2 | 0.51676182 | 0.10122019 |
| chr4 | 73373561 | 73495623 | 122063 | 2  | 1 | 4 | 0.02438896 | 0.47744371 | 3 | 2 | 0.51676182 | 0.0429175  |
| chr4 | 73495623 | 73930473 | 434851 | 5  | 1 | 4 | 0.02438896 | 0.30102999 | 3 | 2 | 0.51676182 | 0.10122019 |
| chr4 | 73930473 | 73930532 | 60     | 1  | 2 | 4 | 0.08289318 | 0.30102999 | 3 | 3 | 0.30102999 | 0.10122019 |
| chr4 | 73930532 | 73994060 | 63529  | 2  | 1 | 4 | 0.02438896 | 0.30102999 | 3 | 3 | 0.51676182 | 0.10122019 |
| chr4 | 73994060 | 74027044 | 32985  | 2  | 1 | 4 | 0.02438896 | 0.18734596 | 3 | 4 | 0.51676182 | 0.18734596 |
| chr4 | 74027044 | 74076511 | 49468  | 2  | 1 | 5 | 0.02438896 | 0.30102999 | 3 | 4 | 0.51676182 | 0.11390336 |
| chr4 | 74076511 | 74115854 | 39344  | 1  | 1 | 5 | 0.02438896 | 0.45545077 | 3 | 3 | 0.51676182 | 0.05670724 |
| chr4 | 74115854 | 74279312 | 163459 | 3  | 1 | 5 | 0.01091641 | 0.45545077 | 4 | 3 | 0.76005302 | 0.05670724 |
| chr4 | 74279312 | 74391127 | 111816 | 5  | 1 | 5 | 0.00478973 | 0.45545077 | 5 | 3 | 1.02643191 | 0.05670724 |
| chr4 | 74391127 | 74391186 | 60     | 1  | 1 | 6 | 0.00478973 | 0.63695542 | 5 | 3 | 1.02643191 | 0.03070643 |
| chr4 | 74391186 | 74484902 | 93717  | 2  | 1 | 6 | 0.01091641 | 0.63695542 | 4 | 3 | 0.76005302 | 0.03070643 |
| chr4 | 74484902 | 74703204 | 218303 | 4  | 1 | 6 | 0.02438896 | 0.63695542 | 3 | 3 | 0.51676182 | 0.03070643 |
| chr4 | 74703204 | 74703789 | 586    | 1  | 1 | 7 | 0.02438896 | 0.84395715 | 3 | 3 | 0.51676182 | 0.01598258 |
| chr4 | 74703789 | 74769169 | 65381  | 2  | 1 | 6 | 0.02438896 | 0.63695542 | 3 | 3 | 0.51676182 | 0.03070643 |
| chr4 | 74769169 | 74769228 | 60     | 1  | 2 | 6 | 0.0429175  | 0.63695542 | 4 | 3 | 0.47744371 | 0.03070643 |
| chr4 | 74769228 | 74852953 | 83726  | 2  | 1 | 6 | 0.01091641 | 0.63695542 | 4 | 3 | 0.76005302 | 0.03070643 |
| chr4 | 74852953 | 74862821 | 9869   | 1  | 1 | 4 | 0.01091641 | 0.30102999 | 4 | 3 | 0.76005302 | 0.10122019 |
| chr4 | 74862821 | 74963200 | 100380 | 6  | 2 | 4 | 0.0429175  | 0.30102999 | 4 | 4 | 0.47744371 | 0.10122019 |
| chr4 | 74963200 | 74963259 | 60     | 1  | 2 | 6 | 0.0429175  | 0.63695542 | 4 | 3 | 0.47744371 | 0.03070643 |
| chr4 | 74963259 | 75239841 | 276583 | 6  | 1 | 6 | 0.01091641 | 0.63695542 | 4 | 3 | 0.76005302 | 0.03070643 |
| chr4 | 75239841 | 75246872 | 7032   | 2  | 1 | 7 | 0.01091641 | 0.84395715 | 3 | 3 | 0.76005302 | 0.01598    |

|      |          |          |        |    |    |            |            |            |   |            |            |            |
|------|----------|----------|--------|----|----|------------|------------|------------|---|------------|------------|------------|
| chr4 | 78647247 | 78804617 | 157371 | 4  | 1  | 5          | 0.00478973 | 0.19510895 | 5 | 5          | 1.02643191 | 0.19510895 |
| chr4 | 78804617 | 79076040 | 271424 | 1  | 6  | 0.00204627 | 0.30102999 | 6          | 5 | 1.31360226 | 0.12309572 |            |
| chr4 | 79076040 | 79307240 | 231201 | 7  | 1  | 6          | 0.00478973 | 0.44141547 | 5 | 4          | 1.02643191 | 0.06713722 |
| chr4 | 79307240 | 79408088 | 100849 | 2  | 1  | 6          | 0.00478973 | 0.63695542 | 5 | 3          | 1.02643191 | 0.03070643 |
| chr4 | 79408088 | 79408147 | 60     | 1  | 6  | 0.00478973 | 0.30102999 | 5          | 5 | 1.02643191 | 0.12309572 |            |
| chr4 | 79408147 | 79701251 | 293105 | 6  | 1  | 6          | 0.00478973 | 0.63695542 | 5 | 3          | 1.02643191 | 0.03070643 |
| chr4 | 79701251 | 79741037 | 39787  | 2  | 1  | 6          | 0.00204627 | 0.63695542 | 6 | 3          | 1.31360226 | 0.03070643 |
| chr4 | 79741037 | 79869478 | 128442 | 9  | 1  | 6          | 0.00204627 | 0.44141547 | 6 | 4          | 1.31360226 | 0.06713722 |
| chr4 | 79869478 | 79972194 | 102717 | 2  | 1  | 5          | 0.00204627 | 0.30102999 | 6 | 4          | 1.31360226 | 0.11390336 |
| chr4 | 79972194 | 80020176 | 47983  | 2  | 1  | 6          | 0.00204627 | 0.44141547 | 6 | 4          | 1.31360226 | 0.06713722 |
| chr4 | 80020176 | 80020235 | 60     | 1  | 6  | 0.00204627 | 0.30102999 | 6          | 5 | 1.31360226 | 0.12309572 |            |
| chr4 | 80020235 | 80103546 | 83312  | 1  | 6  | 0.00204627 | 0.44141547 | 6          | 4 | 1.31360226 | 0.06713722 |            |
| chr4 | 80103546 | 80103605 | 60     | 1  | 6  | 0.00204627 | 0.30102999 | 6          | 5 | 1.31360226 | 0.12309572 |            |
| chr4 | 80103605 | 80188542 | 84938  | 1  | 6  | 0.00478973 | 0.44141547 | 5          | 4 | 1.02643191 | 0.06713722 |            |
| chr4 | 80188542 | 80188601 | 60     | 1  | 6  | 0.00478973 | 0.30102999 | 5          | 5 | 1.02643191 | 0.12309572 |            |
| chr4 | 80188601 | 80243920 | 55320  | 2  | 1  | 6          | 0.01091641 | 0.30102999 | 4 | 5          | 0.76005302 | 0.12309572 |
| chr4 | 80243920 | 80327877 | 83958  | 1  | 1  | 5          | 0.01091641 | 0.19510895 | 4 | 5          | 0.76005302 | 0.19510895 |
| chr4 | 80327877 | 80394761 | 66885  | 2  | 1  | 6          | 0.01091641 | 0.30102999 | 4 | 5          | 0.76005302 | 0.12309572 |
| chr4 | 80394761 | 80394820 | 60     | 1  | 8  | 0.01091641 | 0.58747015 | 4          | 5 | 0.76005302 | 0.04407651 |            |
| chr4 | 80394820 | 80490393 | 95574  | 1  | 7  | 0.01091641 | 0.43181735 | 4          | 5 | 0.76005302 | 0.07511598 |            |
| chr4 | 80490393 | 80490452 | 60     | 1  | 7  | 0.01091641 | 0.58747015 | 4          | 5 | 0.76005302 | 0.04407651 |            |
| chr4 | 80490452 | 80597312 | 106861 | 1  | 7  | 0.01091641 | 0.43181735 | 4          | 5 | 0.76005302 | 0.07511598 |            |
| chr4 | 80597312 | 80597371 | 60     | 1  | 8  | 0.00478973 | 0.58747015 | 5          | 3 | 1.02643191 | 0.04407651 |            |
| chr4 | 80597371 | 80707668 | 110298 | 1  | 7  | 0.02438896 | 0.43181735 | 3          | 5 | 0.51676182 | 0.07511598 |            |
| chr4 | 80707668 | 80707727 | 60     | 1  | 8  | 0.02438896 | 0.58747015 | 3          | 5 | 0.51676182 | 0.04407651 |            |
| chr4 | 80707727 | 80872939 | 165213 | 4  | 1  | 7          | 0.02438896 | 0.43181735 | 3 | 5          | 0.51676182 | 0.07511598 |
| chr4 | 80872939 | 81289268 | 416330 | 10 | 1  | 8          | 0.02438896 | 0.58747015 | 3 | 5          | 0.51676182 | 0.04407651 |
| chr4 | 81289268 | 81408990 | 119713 | 2  | 1  | 7          | 0.02438896 | 0.43181735 | 3 | 5          | 0.51676182 | 0.07511598 |
| chr4 | 81408990 | 81447997 | 39018  | 2  | 1  | 9          | 0.02438896 | 0.76806664 | 3 | 5          | 0.51676182 | 0.02473314 |
| chr4 | 81447997 | 81504230 | 56234  | 1  | 8  | 0.02438896 | 0.58747015 | 3          | 5 | 0.51676182 | 0.04407651 |            |
| chr4 | 81504230 | 81702044 | 197815 | 6  | 1  | 9          | 0.02438896 | 0.5732208  | 3 | 6          | 0.51676182 | 0.04875589 |
| chr4 | 81702044 | 81702103 | 60     | 1  | 10 | 0.02438896 | 0.74627054 | 3          | 6 | 0.51676182 | 0.02793176 |            |
| chr4 | 81702103 | 81798577 | 96475  | 2  | 1  | 6          | 0.02438896 | 0.4250187  | 3 | 6          | 0.51676182 | 0.08122616 |
| chr4 | 81798577 | 81884651 | 86075  | 2  | 1  | 8          | 0.02438896 | 0.30102999 | 5 | 5          | 0.51676182 | 0.12309572 |
| chr4 | 81884651 | 81898468 | 13818  | 1  | 7  | 0.02438896 | 0.43181735 | 3          | 5 | 0.51676182 | 0.07511598 |            |
| chr4 | 81898468 | 81970919 | 72452  | 1  | 4  | 0.02438896 | 0.11390336 | 3          | 5 | 0.51676182 | 0.30102999 |            |
| chr4 | 81970919 | 81970978 | 60     | 1  | 4  | 0.02438896 | 0.06713722 | 3          | 6 | 0.51676182 | 0.44141547 |            |
| chr4 | 81970978 | 82158097 | 187120 | 4  | 1  | 4          | 0.05404976 | 0.06713722 | 2 | 6          | 0.30102999 | 0.44141547 |
| chr4 | 82158097 | 82251719 | 93623  | 1  | 1  | 4          | 0.05404976 | 0.18734596 | 2 | 4          | 0.30102999 | 0.18734596 |
| chr4 | 82251719 | 82312971 | 61253  | 1  | 1  | 4          | 0.05404976 | 0.17593012 | 3 | 3          | 0.30102999 | 0.17593012 |
| chr4 | 82312971 | 82373903 | 60933  | 2  | 1  | 3          | 0.05404976 | 0.03070643 | 6 | 7          | 0.30102999 | 0.63695542 |
| chr4 | 82373903 | 82378778 | 4876   | 2  | 1  | 3          | 0.05404976 | 0.01598258 | 2 | 7          | 0.30102999 | 0.84395715 |
| chr4 | 82378778 | 82472611 | 93834  | 2  | 1  | 3          | 0.05404976 | 0.03070643 | 6 | 6          | 0.30102999 | 0.63695542 |
| chr4 | 82472611 | 82583953 | 111343 | 1  | 3  | 0.05404976 | 0.05670724 | 2          | 5 | 0.30102999 | 0.45545077 |            |
| chr4 | 82583953 | 82584012 | 60     | 1  | 3  | 0.05404976 | 0.03070643 | 2          | 6 | 0.30102999 | 0.63695542 |            |
| chr4 | 82584012 | 82777709 | 193698 | 2  | 1  | 2          | 0.05404976 | 0.0429175  | 4 | 4          | 0.30102999 | 0.47744371 |
| chr4 | 82777709 | 82981798 | 204090 | 2  | 1  | 2          | 0.05404976 | 0.02162467 | 5 | 5          | 0.30102999 | 0.68214471 |
| chr4 | 82981798 | 83072285 | 90488  | 2  | 1  | 6          | 0.05404976 | 0.129913   | 2 | 7          | 0.30102999 | 0.30102999 |
| chr4 | 83072285 | 83155020 | 82736  | 1  | 1  | 5          | 0.05404976 | 0.12309572 | 6 | 2          | 0.30102999 | 0.30102999 |
| chr4 | 83155020 | 83155079 | 60     | 1  | 5  | 0.05404976 | 0.07511598 | 2          | 7 | 0.30102999 | 0.43181735 |            |
| chr4 | 83155079 | 83381760 | 226682 | 3  | 1  | 5          | 0.05404976 | 0.19510895 | 5 | 3          | 0.30102999 | 0.19510895 |
| chr4 | 83381760 | 83382059 | 300    | 2  | 1  | 5          | 0.05404976 | 0.12309572 | 2 | 6          | 0.30102999 | 0.30102999 |
| chr4 | 83382059 | 83429357 | 47299  | 1  | 4  | 4          | 0.05404976 | 0.18734596 | 2 | 4          | 0.30102999 | 0.18734596 |
| chr4 | 83429357 | 83486706 | 57350  | 1  | 1  | 4          | 0.05404976 | 0.30102999 | 2 | 3          | 0.30102999 | 0.10122019 |
| chr4 | 83486706 | 83522978 | 36273  | 1  | 4  | 4          | 0.05404976 | 0.47744371 | 2 | 2          | 0.30102999 | 0.0429175  |
| chr4 | 83522978 | 83556566 | 32679  | 2  | 1  | 4          | 0.02438896 | 0.30102999 | 3 | 3          | 0.51676182 | 0.10122019 |
| chr4 | 83556566 | 83740092 | 184437 | 7  | 1  | 5          | 0.02438896 | 0.30102999 | 3 | 4          | 0.51676182 | 0.11390336 |
| chr4 | 83740092 | 83785496 | 45405  | 1  | 4  | 4          | 0.02438896 | 0.30102999 | 3 | 3          | 0.51676182 | 0.10122019 |
| chr4 | 83785496 | 83900040 | 114545 | 4  | 1  | 5          | 0.02438896 | 0.30102999 | 3 | 4          | 0.51676182 | 0.11390336 |
| chr4 | 83900040 | 84036024 | 135985 | 6  | 1  | 5          | 0.02438896 | 0.19510895 | 3 | 5          | 0.51676182 | 0.19510895 |
| chr4 | 84036024 | 84135063 | 279040 | 4  | 1  | 5          | 0.05404976 | 0.19510895 | 5 | 5          | 0.30102999 | 0.19510895 |
| chr4 | 84135063 | 84374297 | 59235  | 3  | 1  | 5          | 0.02438896 | 0.19510895 | 3 | 5          | 0.51676182 | 0.19510895 |
| chr4 | 84374297 | 84374356 | 60     | 1  | 5  | 0.02438896 | 0.12309572 | 3          | 6 | 0.51676182 | 0.30102999 |            |
| chr4 | 84374356 | 84380357 | 6002   | 2  | 1  | 5          | 0.02438896 | 0.19510895 | 3 | 5          | 0.51676182 | 0.19510895 |
| chr4 | 84380357 | 84380416 | 60     | 1  | 1  | 5          | 0.02438896 | 0.19510895 | 3 | 6          | 0.51676182 | 0.30102999 |
| chr4 | 84380416 | 84400666 | 19651  | 1  | 5  | 5          | 0.02438896 | 0.30102999 | 3 | 4          | 0.51676182 | 0.11390336 |
| chr4 | 84400666 | 84489988 | 89923  | 2  | 1  | 5          | 0.02438896 | 0.45545077 | 3 | 3          | 0.51676182 | 0.05670724 |
| chr4 | 84489988 | 84584470 | 94483  | 4  | 1  | 5          | 0.02438896 | 0.30102999 | 3 | 4          | 0.51676182 | 0.11390336 |
| chr4 | 84584470 | 84766562 | 182093 | 1  | 4  | 4          | 0.02438896 | 0.18734596 | 3 | 4          | 0.51676182 | 0.18734596 |
| chr4 | 84766562 | 84891504 | 124943 | 3  | 1  | 4          | 0.01091641 | 0.18734596 | 4 | 4          | 0.76005302 | 0.18734596 |
| chr4 | 84891504 | 84891563 | 60     | 1  | 4  | 5          | 0.01091641 | 0.11390336 | 4 | 5          | 0.76005302 | 0.30102999 |
| chr4 | 84891563 | 84965324 | 73762  | 1  | 4  | 4          | 0.01091641 | 0.30102999 | 4 | 3          | 0.76005302 | 0.10122019 |
| chr4 | 84965324 | 85109176 | 143853 | 2  | 1  | 3          | 0.01091641 | 0.30102999 | 4 | 2          | 0.76005302 | 0.08289318 |
| chr4 | 85109176 | 85109235 | 60     | 1  | 1  | 3          | 0.01091641 | 0.17593012 | 4 | 3          | 0.76005302 | 0.17593012 |
| chr4 | 85109235 | 85206674 | 97440  | 1  | 1  | 2          | 0.01091641 | 0.1575501  | 4 | 2          | 0.76005302 | 0.1575501  |
| chr4 | 85206674 | 85206733 | 60     | 1  | 2  | 0.01091641 | 0.08289318 | 4          | 3 | 0.76005302 | 0.30102999 |            |
| chr4 | 85206733 | 85338191 | 131459 | 1  | 2  | 2          | 0.05404976 | 0.1575501  | 2 | 2          | 0.30102999 | 0.1575501  |
| chr4 | 85338191 | 85417374 | 79184  | 1  | 1  | 1          | 0.05404976 | 0.1218695  | 2 | 1          | 0.30102999 | 0.1218695  |
| chr4 | 85417374 | 85417433 | 60     | 1  | 2  | 0.05404976 | 0.08289318 | 2          | 3 | 0.30102999 | 0.30102999 |            |
| chr4 | 85417433 | 85510609 | 93177  | 1  | 1  | 1          | 0.1218695  | 0.02438896 | 1 | 3          | 0.1218695  | 0.51676182 |
| chr4 | 85510609 | 85540594 | 29986  | 1  | 1  | 1          | 0.1218695  | 0.05404976 | 1 | 2          | 0.1218695  | 0.30102999 |
| chr4 | 85540594 | 85590841 | 50248  | 3  | 1  | 1          | 0.1218695  | 0.02438896 | 1 | 3          | 0.1218695  | 0.51676182 |
| chr4 | 85590841 | 85590900 | 60     | 1  | 1  | 1          | 0.1218695  | 0.01091641 | 1 | 4          | 0.1218695  | 0.76005302 |
| chr4 | 85590900 | 85672613 | 81714  | 2  | 1  | 0          | 0.1218695  | 0          | 1 | 2          | 0.1218695  | 0.61140001 |
| chr4 | 85672613 | 85672672 | 60     | 1  | 1  | 1          | 0.1218695  | 0.05404976 | 1 | 2          | 0.1218695  | 0.30102999 |
| chr4 | 85672672 | 85729284 | 56613  | 1  | 0  | 0          | 0.1218695  | 0          | 1 | 2          | 0.1218695  | 0.61140001 |
| chr4 | 85729284 | 85759812 | 30529  | 2  | 1  | 0          | 0.1218695  | 0          | 1 | 3          | 0.1218695  | 0.93173516 |
| chr4 | 85759812 | 85759871 | 60     | 1  | 2  | 0.05404976 | 0.08289318 | 2          | 3 | 0.30102999 | 0.30102999 |            |
| chr4 | 85759871 | 85853466 | 93596  | 2  | 1  | 1          | 0.1218695  | 0.02438896 | 3 | 3          | 0.1218695  | 0.51676182 |
| chr4 | 85853466 | 86171521 | 318056 | 5  | 1  | 1          | 0.05404976 | 0.02438896 | 2 | 3          | 0.30102999 | 0.51676182 |
| chr4 | 86171521 | 86261894 | 90374  | 2  | 1  | 2          | 0.05404976 | 0.08289318 | 2 | 3          | 0.30102999 | 0.30102999 |
| chr4 | 86261894 | 86438402 | 17     |    |    |            |            |            |   |            |            |            |

|      |          |          |        |    |   |            |            |            |   |            |            |            |
|------|----------|----------|--------|----|---|------------|------------|------------|---|------------|------------|------------|
| chr4 | 88900122 | 88949541 | 49420  | 2  | 1 | 4          | 0.01091641 | 0.18734596 | 4 | 4          | 0.76005302 | 0.18734596 |
| chr4 | 88949541 | 89052197 | 102657 | 4  | 1 | 5          | 0.00478973 | 0.19510895 | 5 | 5          | 1.02643191 | 0.19510895 |
| chr4 | 89052197 | 89052251 | 55     | 1  | 6 | 0.00478973 | 0.30102999 | 5          | 5 | 1.02643191 | 0.12309572 |            |
| chr4 | 89052251 | 89183609 | 131359 | 2  | 1 | 5          | 0.02438896 | 0.19510895 | 3 | 5          | 0.51676182 | 0.19510895 |
| chr4 | 89183609 | 89183668 | 60     | 1  | 6 | 0.01091641 | 0.30102999 | 4          | 5 | 0.76005302 | 0.12309572 |            |
| chr4 | 89183668 | 89198376 | 14709  | 2  | 1 | 6          | 0.02438896 | 0.44141547 | 3 | 4          | 0.51676182 | 0.06713722 |
| chr4 | 89198376 | 89577303 | 378928 | 8  | 1 | 5          | 0.02438896 | 0.30102999 | 3 | 4          | 0.51676182 | 0.11390336 |
| chr4 | 89577303 | 89648163 | 70861  | 1  | 1 | 5          | 0.05404976 | 0.30102999 | 2 | 4          | 0.30102999 | 0.11390336 |
| chr4 | 89648163 | 89648222 | 60     | 1  | 6 | 0.05404976 | 0.44141547 | 2          | 4 | 0.30102999 | 0.06713722 |            |
| chr4 | 89648222 | 89791253 | 143032 | 3  | 1 | 5          | 0.05404976 | 0.30102999 | 2 | 4          | 0.30102999 | 0.11390336 |
| chr4 | 89791253 | 89856353 | 65101  | 1  | 1 | 5          | 0.05404976 | 0.45545077 | 2 | 3          | 0.30102999 | 0.05670724 |
| chr4 | 89856353 | 89856412 | 60     | 1  | 6 | 0.05404976 | 0.63695542 | 2          | 3 | 0.30102999 | 0.03070643 |            |
| chr4 | 89856412 | 89951120 | 94709  | 2  | 1 | 5          | 0.05404976 | 0.68214471 | 2 | 2          | 0.30102999 | 0.02162467 |
| chr4 | 89951120 | 89951179 | 60     | 1  | 5 | 0.05404976 | 0.30102999 | 2          | 4 | 0.30102999 | 0.11390336 |            |
| chr4 | 89951179 | 90462350 | 511172 | 9  | 1 | 5          | 0.05404976 | 0.68214471 | 2 | 2          | 0.30102999 | 0.02162467 |
| chr4 | 90462350 | 90638181 | 175832 | 2  | 1 | 6          | 0.05404976 | 0.63695542 | 2 | 3          | 0.30102999 | 0.03070643 |
| chr4 | 90638181 | 90647688 | 9508   | 2  | 2 | 8          | 0.1575501  | 1.07548421 | 2 | 3          | 0.1575501  | 0.0079614  |
| chr4 | 90647688 | 90684820 | 37133  | 1  | 1 | 7          | 0.05404976 | 1.16581773 | 2 | 2          | 0.30102999 | 0.00493743 |
| chr4 | 90684820 | 90722644 | 37825  | 1  | 1 | 6          | 0.05404976 | 0.91219088 | 2 | 2          | 0.30102999 | 0.01053319 |
| chr4 | 90722644 | 90797095 | 74452  | 2  | 1 | 5          | 0.05404976 | 0.68214471 | 2 | 2          | 0.30102999 | 0.02162467 |
| chr4 | 90797095 | 90833151 | 36957  | 1  | 1 | 5          | 0.08289318 | 0.68214471 | 3 | 2          | 0.30102999 | 0.02162467 |
| chr4 | 90833151 | 90902061 | 68911  | 2  | 1 | 2          | 0.02438896 | 0.68214471 | 2 | 2          | 0.51676182 | 0.02162467 |
| chr4 | 90902061 | 91047347 | 145287 | 1  | 1 | 5          | 0.05404976 | 0.68214471 | 2 | 2          | 0.30102999 | 0.02162467 |
| chr4 | 91047347 | 91147550 | 100204 | 2  | 2 | 5          | 0.1575501  | 0.68214471 | 2 | 2          | 0.1575501  | 0.02162467 |
| chr4 | 91147550 | 91213084 | 65535  | 2  | 1 | 2          | 0.05404976 | 0.1575501  | 2 | 2          | 0.30102999 | 0.1575501  |
| chr4 | 91213084 | 91213143 | 60     | 1  | 1 | 3          | 0.05404976 | 0.30102999 | 2 | 2          | 0.30102999 | 0.08289318 |
| chr4 | 91213143 | 91292877 | 79735  | 1  | 1 | 2          | 0.05404976 | 0.1575501  | 2 | 2          | 0.30102999 | 0.1575501  |
| chr4 | 91292877 | 91292936 | 60     | 1  | 2 | 4          | 0.1575501  | 0.30102999 | 2 | 3          | 0.1575501  | 0.10122019 |
| chr4 | 91292936 | 91399112 | 106177 | 3  | 1 | 2          | 0.05404976 | 0.1575501  | 2 | 2          | 0.30102999 | 0.1575501  |
| chr4 | 91399112 | 91464466 | 65355  | 3  | 1 | 2          | 0.02438896 | 0.1575501  | 3 | 2          | 0.51676182 | 0.1575501  |
| chr4 | 91464466 | 91464525 | 60     | 1  | 2 | 2          | 0.01091641 | 0.1575501  | 4 | 2          | 0.76005302 | 0.1575501  |
| chr4 | 91464525 | 91603233 | 138709 | 3  | 1 | 2          | 0.02438896 | 0.1575501  | 3 | 2          | 0.51676182 | 0.1575501  |
| chr4 | 91603233 | 91603292 | 60     | 1  | 1 | 3          | 0.01091641 | 0.30102999 | 4 | 2          | 0.76005302 | 0.08289318 |
| chr4 | 91603292 | 91651077 | 47786  | 1  | 1 | 2          | 0.02438896 | 0.1575501  | 2 | 2          | 0.51676182 | 0.1575501  |
| chr4 | 91651077 | 91699333 | 48257  | 2  | 1 | 3          | 0.02438896 | 0.30102999 | 2 | 2          | 0.51676182 | 0.08289318 |
| chr4 | 91699333 | 91760887 | 61555  | 3  | 1 | 2          | 0.02438896 | 0.1575501  | 3 | 2          | 0.51676182 | 0.1575501  |
| chr4 | 91760887 | 92037915 | 277029 | 4  | 1 | 1          | 0.05404976 | 0.1218695  | 2 | 1          | 0.30102999 | 0.1218695  |
| chr4 | 92037915 | 92117968 | 80054  | 2  | 1 | 2          | 0.05404976 | 0.30102999 | 2 | 1          | 0.30102999 | 0.05404976 |
| chr4 | 92117968 | 92118027 | 60     | 1  | 1 | 4          | 0.05404976 | 0.47744371 | 2 | 2          | 0.30102999 | 0.0429175  |
| chr4 | 92118027 | 92202997 | 84971  | 1  | 1 | 3          | 0.05404976 | 0.51676182 | 2 | 1          | 0.30102999 | 0.02438896 |
| chr4 | 92202997 | 92331091 | 128095 | 3  | 1 | 3          | 0.02438896 | 0.51676182 | 3 | 1          | 0.51676182 | 0.02438896 |
| chr4 | 92331091 | 92331150 | 60     | 1  | 4 | 4          | 0.02438896 | 0.76005302 | 3 | 1          | 0.51676182 | 0.01091641 |
| chr4 | 92331150 | 92593100 | 261951 | 3  | 1 | 3          | 0.02438896 | 0.51676182 | 3 | 1          | 0.51676182 | 0.02438896 |
| chr4 | 92593100 | 92854003 | 260904 | 1  | 1 | 2          | 0.05404976 | 0.61140001 | 2 | 0          | 0.30102999 | 0          |
| chr4 | 92854003 | 92854062 | 60     | 1  | 1 | 2          | 0.05404976 | 0.30102999 | 2 | 1          | 0.30102999 | 0.05404976 |
| chr4 | 92854062 | 93028413 | 174352 | 1  | 1 | 2          | 0.1218695  | 0.30102999 | 1 | 1          | 0.1218695  | 0.05404976 |
| chr4 | 93028413 | 93090575 | 62163  | 2  | 1 | 3          | 0.1218695  | 0.30102999 | 1 | 2          | 0.1218695  | 0.08289318 |
| chr4 | 93090575 | 93202223 | 111649 | 1  | 1 | 2          | 0.1218695  | 0.1575501  | 1 | 2          | 0.1575501  | 0.1575501  |
| chr4 | 93202223 | 93226245 | 24023  | 2  | 1 | 3          | 0.05404976 | 0.17593012 | 2 | 3          | 0.30102999 | 0.17593012 |
| chr4 | 93226245 | 93306651 | 80407  | 2  | 1 | 3          | 0.1218695  | 0.30102999 | 2 | 2          | 0.1218695  | 0.08289318 |
| chr4 | 93306651 | 93359924 | 53274  | 2  | 1 | 3          | 0.05404976 | 0.17593012 | 2 | 3          | 0.30102999 | 0.17593012 |
| chr4 | 93359924 | 93434401 | 74478  | 2  | 1 | 4          | 0.05404976 | 0.30102999 | 2 | 3          | 0.30102999 | 0.10122019 |
| chr4 | 93434401 | 93554942 | 120542 | 2  | 1 | 4          | 0.1218695  | 0.30102999 | 1 | 3          | 0.1218695  | 0.10122019 |
| chr4 | 93554942 | 93712943 | 158002 | 5  | 1 | 5          | 0.05404976 | 0.30102999 | 2 | 4          | 0.30102999 | 0.11390336 |
| chr4 | 93712943 | 93753109 | 40167  | 2  | 1 | 6          | 0.05404976 | 0.44141547 | 3 | 4          | 0.30102999 | 0.06713722 |
| chr4 | 93753109 | 93834596 | 81488  | 1  | 1 | 6          | 0.05404976 | 0.63695542 | 3 | 3          | 0.30102999 | 0.03070643 |
| chr4 | 93834596 | 93867292 | 32697  | 1  | 1 | 5          | 0.05404976 | 0.45545077 | 2 | 4          | 0.30102999 | 0.05670724 |
| chr4 | 93867292 | 94032035 | 164744 | 4  | 1 | 5          | 0.05404976 | 0.30102999 | 2 | 3          | 0.30102999 | 0.11390336 |
| chr4 | 94032035 | 94139865 | 107831 | 2  | 1 | 4          | 0.05404976 | 0.18734596 | 2 | 4          | 0.30102999 | 0.18734596 |
| chr4 | 94139865 | 94213879 | 74015  | 1  | 1 | 4          | 0.05404976 | 0.30102999 | 2 | 3          | 0.30102999 | 0.10122019 |
| chr4 | 94213879 | 94213938 | 60     | 1  | 1 | 5          | 0.02438896 | 0.45545077 | 3 | 3          | 0.51676182 | 0.05670724 |
| chr4 | 94213938 | 94326388 | 112451 | 2  | 1 | 4          | 0.02438896 | 0.47744371 | 3 | 2          | 0.51676182 | 0.0429175  |
| chr4 | 94326388 | 94326447 | 60     | 1  | 1 | 5          | 0.02438896 | 0.45545077 | 3 | 3          | 0.51676182 | 0.05670724 |
| chr4 | 94326447 | 94362727 | 36281  | 1  | 1 | 4          | 0.02438896 | 0.30102999 | 3 | 3          | 0.51676182 | 0.10122019 |
| chr4 | 94362727 | 94462921 | 100195 | 3  | 1 | 5          | 0.02438896 | 0.30102999 | 3 | 3          | 0.51676182 | 0.05670724 |
| chr4 | 94462921 | 94575566 | 112646 | 3  | 1 | 5          | 0.02438896 | 0.17593012 | 3 | 3          | 0.51676182 | 0.17593012 |
| chr4 | 94575566 | 94575625 | 60     | 1  | 1 | 5          | 0.02438896 | 0.45545077 | 3 | 3          | 0.51676182 | 0.05670724 |
| chr4 | 94575625 | 94693423 | 117799 | 2  | 1 | 4          | 0.02438896 | 0.30102999 | 3 | 3          | 0.51676182 | 0.10122019 |
| chr4 | 94693423 | 94859936 | 166514 | 2  | 1 | 3          | 0.02438896 | 0.17593012 | 3 | 3          | 0.51676182 | 0.17593012 |
| chr4 | 94859936 | 95099249 | 239114 | 2  | 1 | 3          | 0.05404976 | 0.17593012 | 2 | 3          | 0.30102999 | 0.17593012 |
| chr4 | 95099249 | 95147332 | 48084  | 2  | 1 | 3          | 0.02438896 | 0.30102999 | 3 | 3          | 0.51676182 | 0.10122019 |
| chr4 | 95147332 | 95210716 | 63385  | 3  | 1 | 4          | 0.02438896 | 0.11390336 | 3 | 5          | 0.51676182 | 0.30102999 |
| chr4 | 95210716 | 95269953 | 59238  | 2  | 1 | 4          | 0.05404976 | 0.18734596 | 4 | 4          | 0.30102999 | 0.18734596 |
| chr4 | 95269953 | 95406121 | 136169 | 2  | 1 | 3          | 0.05404976 | 0.10122019 | 2 | 4          | 0.30102999 | 0.30102999 |
| chr4 | 95406121 | 95496808 | 90688  | 3  | 1 | 4          | 0.05404976 | 0.18734596 | 2 | 4          | 0.30102999 | 0.18734596 |
| chr4 | 95496808 | 95548979 | 51272  | 1  | 1 | 3          | 0.05404976 | 0.10122019 | 2 | 4          | 0.30102999 | 0.30102999 |
| chr4 | 95548979 | 95585351 | 36373  | 1  | 1 | 3          | 0.05404976 | 0.30102999 | 2 | 2          | 0.30102999 | 0.08289318 |
| chr4 | 95585351 | 95585410 | 60     | 1  | 1 | 4          | 0.05404976 | 0.47744371 | 2 | 2          | 0.30102999 | 0.0429175  |
| chr4 | 95585410 | 95730539 | 145130 | 2  | 1 | 3          | 0.05404976 | 0.30102999 | 2 | 2          | 0.30102999 | 0.08289318 |
| chr4 | 95730539 | 95730598 | 60     | 1  | 1 | 4          | 0.05404976 | 0.47744371 | 2 | 2          | 0.30102999 | 0.0429175  |
| chr4 | 95730598 | 95996087 | 265490 | 5  | 1 | 2          | 0.05404976 | 0.1575501  | 2 | 2          | 0.30102999 | 0.1575501  |
| chr4 | 95996087 | 96075791 | 79705  | 3  | 1 | 3          | 0.05404976 | 0.30102999 | 2 | 3          | 0.30102999 | 0.08289318 |
| chr4 | 96075791 | 96522408 | 446618 | 10 | 1 | 3          | 0.05404976 | 0.17593012 | 2 | 3          | 0.30102999 | 0.17593012 |
| chr4 | 96522408 | 96522467 | 60     | 1  | 1 | 4          | 0.05404976 | 0.18734596 | 2 | 4          | 0.30102999 | 0.18734596 |
| chr4 | 96522467 | 96648516 | 126050 | 1  | 1 | 3          | 0.05404976 | 0.17593012 | 2 | 3          | 0.30102999 | 0.17593012 |
| chr4 | 96648516 | 96761384 | 112869 | 1  | 1 | 3          | 0.1218695  | 0.30102999 | 1 | 2          | 0.1218695  | 0.08289318 |
| chr4 | 96761384 | 96762490 | 1107   | 2  | 1 | 3          | 0.30102999 | 0.30102999 | 1 | 2          | 0.05404976 | 0.05404976 |
| chr4 | 96762490 | 96793717 | 31228  | 2  | 1 | 3          | 0.30102999 | 0.17593012 | 3 | 3          | 0.05404976 | 0.17593012 |
| chr4 | 96793717 | 96895658 | 101942 | 1  | 1 | 3          | 0.30102999 | 0.02438896 | 1 | 3          | 0.05404976 | 0.51676182 |
| chr4 | 96895658 | 96895717 | 60     | 1  | 1 | 2          | 0.30102999 | 0.08289318 | 1 | 3          | 0.05404976 | 0.30102999 |
| chr4 | 96895717 | 97055574 |        |    |   |            |            |            |   |            |            |            |

|      |           |           |        |   |   |   |            |            |   |   |            |            |
|------|-----------|-----------|--------|---|---|---|------------|------------|---|---|------------|------------|
| chr4 | 99982761  | 100124832 | 142072 | 3 | 1 | 5 | 0.1218695  | 0.07511598 | 1 | 7 | 0.1218695  | 0.43181735 |
| chr4 | 100124832 | 100256424 | 131599 | 6 | 1 | 6 | 0.1218695  | 0.08122616 | 1 | 8 | 0.1218695  | 0.4250187  |
| chr4 | 100256424 | 100333812 | 77389  | 3 | 1 | 7 | 0.1218695  | 0.13499366 | 1 | 8 | 0.1218695  | 0.30102999 |
| chr4 | 100333812 | 100384021 | 50210  | 2 | 1 | 7 | 0.1218695  | 0.20469099 | 1 | 7 | 0.1218695  | 0.20469099 |
| chr4 | 100384021 | 100384080 | 60     | 1 | 1 | 7 | 0.1218695  | 0.13499366 | 1 | 8 | 0.1218695  | 0.30102999 |
| chr4 | 100384080 | 100740926 | 356847 | 6 | 1 | 7 | 0.1218695  | 0.20469099 | 1 | 7 | 0.1218695  | 0.20469099 |
| chr4 | 100740926 | 100786644 | 45719  | 3 | 1 | 7 | 0.1218695  | 0.13499366 | 1 | 8 | 0.1218695  | 0.30102999 |
| chr4 | 100786644 | 100908940 | 122297 | 4 | 1 | 7 | 0.1218695  | 0.20469099 | 1 | 7 | 0.1218695  | 0.20469099 |
| chr4 | 100908940 | 101160815 | 251876 | 7 | 1 | 7 | 0.1218695  | 0.30102999 | 1 | 7 | 0.1218695  | 0.13499366 |
| chr4 | 101160815 | 101234168 | 73354  | 1 | 1 | 7 | 0.1218695  | 0.20469099 | 1 | 7 | 0.1218695  | 0.20469099 |
| chr4 | 101234168 | 101319111 | 84944  | 2 | 1 | 7 | 0.1218695  | 0.30102999 | 1 | 6 | 0.1218695  | 0.129913   |
| chr4 | 101319111 | 101368859 | 49749  | 1 | 1 | 7 | 0.1218695  | 0.43181735 | 1 | 5 | 0.1218695  | 0.07511598 |
| chr4 | 101368859 | 101368918 | 60     | 1 | 2 | 7 | 0.30102999 | 0.43181735 | 1 | 5 | 0.05404976 | 0.07511598 |
| chr4 | 101368918 | 101439015 | 70098  | 2 | 1 | 6 | 0.1218695  | 0.30102999 | 1 | 5 | 0.1218695  | 0.12309572 |
| chr4 | 101439015 | 101710473 | 271459 | 3 | 1 | 7 | 0.1218695  | 0.43181735 | 1 | 5 | 0.1218695  | 0.07511598 |
| chr4 | 101710473 | 101944715 | 234243 | 2 | 1 | 6 | 0.1218695  | 0.30102999 | 1 | 5 | 0.1218695  | 0.12309572 |
| chr4 | 101944715 | 102042948 | 98234  | 3 | 1 | 7 | 0.1218695  | 0.43181735 | 1 | 5 | 0.1218695  | 0.07511598 |
| chr4 | 102042948 | 102076881 | 33934  | 2 | 1 | 7 | 0.1218695  | 0.30102999 | 1 | 6 | 0.1218695  | 0.129913   |
| chr4 | 102076881 | 102148259 | 71379  | 2 | 1 | 6 | 0.1218695  | 0.30102999 | 1 | 5 | 0.1218695  | 0.12309572 |
| chr4 | 102148259 | 102209343 | 61085  | 2 | 1 | 5 | 0.1218695  | 0.30102999 | 1 | 4 | 0.1218695  | 0.11390336 |
| chr4 | 102209343 | 102209402 | 60     | 1 | 1 | 5 | 0.1218695  | 0.30102999 | 1 | 5 | 0.1218695  | 0.12309572 |
| chr4 | 102209402 | 102251900 | 45789  | 1 | 1 | 5 | 0.1218695  | 0.19510895 | 1 | 5 | 0.1218695  | 0.19510895 |
| chr4 | 102251900 | 102277137 | 21948  | 2 | 1 | 5 | 0.05404976 | 0.19510895 | 1 | 5 | 0.30102999 | 0.19510895 |
| chr4 | 102277137 | 102405772 | 128636 | 2 | 1 | 5 | 0.1218695  | 0.30102999 | 1 | 4 | 0.1218695  | 0.11390336 |
| chr4 | 102405772 | 102735054 | 329283 | 6 | 1 | 5 | 0.05404976 | 0.19510895 | 1 | 5 | 0.30102999 | 0.19510895 |
| chr4 | 102735054 | 102735113 | 60     | 1 | 1 | 6 | 0.05404976 | 0.30102999 | 1 | 2 | 5          | 0.12309572 |
| chr4 | 102735113 | 102751261 | 16149  | 1 | 1 | 5 | 0.05404976 | 0.19510895 | 1 | 5 | 0.30102999 | 0.19510895 |
| chr4 | 102751261 | 102951250 | 199990 | 4 | 1 | 5 | 0.1218695  | 0.19510895 | 1 | 5 | 0.1218695  | 0.19510895 |
| chr4 | 102951250 | 102981260 | 30011  | 2 | 1 | 5 | 0.05404976 | 0.19510895 | 1 | 5 | 0.30102999 | 0.19510895 |
| chr4 | 102981260 | 103025117 | 43858  | 1 | 1 | 5 | 0.1218695  | 0.19510895 | 1 | 5 | 0.1218695  | 0.19510895 |
| chr4 | 103025117 | 103183535 | 158419 | 1 | 1 | 4 | 0.1218695  | 0.11390336 | 1 | 5 | 0.1218695  | 0.30102999 |
| chr4 | 103183535 | 103245089 | 61555  | 3 | 1 | 5 | 0.05404976 | 0.19510895 | 1 | 5 | 0.30102999 | 0.19510895 |
| chr4 | 103245089 | 103362256 | 117168 | 1 | 1 | 5 | 0.05404976 | 0.30102999 | 1 | 2 | 4          | 0.11390336 |
| chr4 | 103362256 | 103517270 | 155015 | 4 | 1 | 5 | 0.05404976 | 0.19510895 | 1 | 5 | 0.30102999 | 0.19510895 |
| chr4 | 103517270 | 103517329 | 60     | 1 | 1 | 5 | 0.05404976 | 0.12309572 | 1 | 2 | 6          | 0.30102999 |
| chr4 | 103517329 | 103671156 | 153828 | 3 | 1 | 4 | 0.05404976 | 0.06713722 | 1 | 2 | 6          | 0.30102999 |
| chr4 | 103671156 | 103739038 | 67883  | 1 | 1 | 4 | 0.1218695  | 0.06713722 | 1 | 1 | 6          | 0.1218695  |
| chr4 | 103739038 | 103941448 | 202411 | 5 | 1 | 3 | 0.1218695  | 0.03070643 | 1 | 6 | 0.1218695  | 0.63695542 |
| chr4 | 103941448 | 104118000 | 176553 | 6 | 1 | 2 | 0.30102999 | 0.0429175  | 0 | 4 | 0          | 0.47744371 |
| chr4 | 104118000 | 104250788 | 132789 | 1 | 1 | 2 | 0.30102999 | 0.08289318 | 0 | 3 | 0          | 0.30102999 |
| chr4 | 104250788 | 104420567 | 169780 | 3 | 1 | 2 | 0.30102999 | 0.0429175  | 0 | 4 | 0          | 0.47744371 |
| chr4 | 104420567 | 104420626 | 60     | 1 | 1 | 3 | 0.30102999 | 0.05670724 | 0 | 5 | 0          | 0.45545077 |
| chr4 | 104420626 | 104638978 | 218353 | 4 | 1 | 2 | 0.30102999 | 0.08289318 | 0 | 3 | 0          | 0.30102999 |
| chr4 | 104638978 | 104699853 | 60876  | 1 | 1 | 2 | 0.30102999 | 0.1575501  | 0 | 2 | 0          | 0.1575501  |
| chr4 | 104699853 | 104826929 | 127077 | 1 | 1 | 1 | 0.30102999 | 0.1218695  | 0 | 1 | 0          | 0.1218695  |
| chr4 | 104826929 | 104955534 | 128606 | 1 | 0 | 1 | 0.1218695  | 0.1218695  | 0 | 1 | 0          | 0.1218695  |
| chr4 | 104955534 | 104955593 | 60     | 1 | 0 | 2 | 0          | 0.30102999 | 0 | 1 | 0          | 0.05404976 |
| chr4 | 104955593 | 105342698 | 387106 | 2 | 0 | 0 | 0.30102999 | 0          | 0 | 0 | 0          | 0          |
| chr4 | 105342698 | 105404237 | 61540  | 3 | 0 | 2 | 0          | 0.0429175  | 0 | 4 | 0          | 0.47744371 |
| chr4 | 105404237 | 105460758 | 56522  | 1 | 0 | 1 | 0          | 0.01091641 | 0 | 4 | 0          | 0.76005302 |
| chr4 | 105460758 | 105460817 | 60     | 1 | 0 | 1 | 0          | 0.01091641 | 0 | 4 | 0.30102999 | 0.76005302 |
| chr4 | 105460817 | 105549175 | 88359  | 1 | 0 | 1 | 0          | 0.02438896 | 0 | 3 | 0          | 0.51676182 |
| chr4 | 105549175 | 105658948 | 109774 | 1 | 0 | 1 | 0          | 0.05404976 | 0 | 2 | 0          | 0.30102999 |
| chr4 | 105658948 | 105807123 | 148176 | 2 | 0 | 1 | 0          | 0.30102999 | 0 | 2 | 0          | 0.08289318 |
| chr4 | 105807123 | 105807182 | 60     | 1 | 0 | 3 | 0          | 0.17593012 | 1 | 3 | 0.30102999 | 0.17593012 |
| chr4 | 105807182 | 105935157 | 127976 | 1 | 0 | 3 | 0          | 0.30102999 | 1 | 2 | 0.30102999 | 0.08289318 |
| chr4 | 105935157 | 105935216 | 60     | 1 | 0 | 5 | 0          | 0.45545077 | 1 | 3 | 0.30102999 | 0.05670724 |
| chr4 | 105935216 | 106081316 | 146101 | 1 | 0 | 5 | 0          | 0.68214471 | 1 | 2 | 0.30102999 | 0.02162467 |
| chr4 | 106081316 | 106111334 | 30019  | 2 | 0 | 6 | 0          | 0.63695542 | 1 | 3 | 0.30102999 | 0.03070643 |
| chr4 | 106111334 | 106196087 | 84754  | 3 | 0 | 6 | 0          | 0.91219088 | 1 | 2 | 0.30102999 | 0.01053319 |
| chr4 | 106196087 | 106196146 | 60     | 1 | 0 | 6 | 0          | 0.44141547 | 1 | 4 | 0.30102999 | 0.06713722 |
| chr4 | 106196146 | 106268111 | 71966  | 1 | 0 | 6 | 0          | 0.63695542 | 1 | 3 | 0.30102999 | 0.03070643 |
| chr4 | 106268111 | 106290817 | 22707  | 2 | 0 | 7 | 0          | 0.84395715 | 1 | 2 | 0.61140001 | 0.01598258 |
| chr4 | 106290817 | 106377862 | 87046  | 2 | 0 | 6 | 0          | 0.63695542 | 1 | 3 | 0.61140001 | 0.03070643 |
| chr4 | 106377862 | 106377921 | 60     | 1 | 0 | 6 | 0          | 0.63695542 | 1 | 3 | 0.93173516 | 0.03070643 |
| chr4 | 106377921 | 106510610 | 132690 | 3 | 0 | 6 | 0          | 0.91219088 | 1 | 2 | 0.61140001 | 0.01053319 |
| chr4 | 106510610 | 106624225 | 113616 | 2 | 0 | 5 | 0          | 0.68214471 | 1 | 2 | 0.61140001 | 0.02162467 |
| chr4 | 106624225 | 106632002 | 7778   | 2 | 0 | 7 | 0          | 1.16581773 | 1 | 3 | 0.93173516 | 0.04983743 |
| chr4 | 106632002 | 106766692 | 134691 | 3 | 0 | 6 | 0          | 0.91219088 | 1 | 2 | 0.61140001 | 0.01053319 |
| chr4 | 106766692 | 106766751 | 60     | 1 | 0 | 6 | 0          | 0.91219088 | 1 | 2 | 0.93173516 | 0.01053319 |
| chr4 | 106766751 | 106861302 | 94522  | 2 | 0 | 4 | 0          | 0.47744371 | 1 | 2 | 0.61140001 | 0.0429175  |
| chr4 | 106861302 | 106861361 | 60     | 1 | 0 | 6 | 0          | 0.91219088 | 1 | 3 | 0.93173516 | 0.01053319 |
| chr4 | 106861361 | 106892598 | 31238  | 1 | 0 | 5 | 0          | 0.68214471 | 1 | 3 | 0.93173516 | 0.02162467 |
| chr4 | 106892598 | 106967123 | 74526  | 1 | 0 | 5 | 0          | 0.68214471 | 1 | 2 | 0.61140001 | 0.02162467 |
| chr4 | 106967123 | 106967182 | 60     | 1 | 0 | 6 | 0          | 0.63695542 | 1 | 3 | 0.61140001 | 0.03070643 |
| chr4 | 106967182 | 107113962 | 146781 | 3 | 0 | 5 | 0          | 0.45545077 | 1 | 3 | 0.61140001 | 0.05670724 |
| chr4 | 107113962 | 107168501 | 54540  | 2 | 0 | 6 | 0          | 0.30102999 | 1 | 2 | 0.61140001 | 0.12309572 |
| chr4 | 107168501 | 107200317 | 31817  | 1 | 0 | 6 | 0          | 0.63695542 | 1 | 3 | 0.61140001 | 0.03070643 |
| chr4 | 107200317 | 107248637 | 48321  | 2 | 0 | 6 | 0          | 0.63695542 | 1 | 3 | 0.93173516 | 0.03070643 |
| chr4 | 107248637 | 107473485 | 224849 | 2 | 0 | 6 | 0          | 0.63695542 | 1 | 3 | 0.30102999 | 0.03070643 |
| chr4 | 107473485 | 107473544 | 60     | 1 | 0 | 6 | 0          | 0.44141547 | 1 | 4 | 0.61140001 | 0.06713722 |
| chr4 | 107473544 | 107583802 | 110259 | 1 | 0 | 5 | 0          | 0.30102999 | 1 | 4 | 0.61140001 | 0.11390336 |
| chr4 | 107583802 | 107743558 | 159757 | 1 | 0 | 4 | 0          | 0.18734596 | 1 | 4 | 0.30102999 | 0.18734596 |
| chr4 | 107743558 | 107845369 | 101812 | 1 | 0 | 3 | 0          | 0.17593012 | 1 | 3 | 0.30102999 | 0.17593012 |
| chr4 | 107845369 | 107880092 | 34724  | 2 | 0 | 3 | 0          | 0.17593012 | 1 | 3 | 0.61140001 | 0.17593012 |
| chr4 | 107880092 | 107880151 | 60     | 1 | 0 | 5 | 0          | 0.30102999 | 1 | 4 | 0.61140001 | 0.11390336 |
| chr4 | 107880151 | 107912408 | 32258  | 1 | 0 | 3 | 0          | 0.17593012 | 1 | 3 | 0.30102999 | 0.17593012 |
| chr4 | 107912408 | 107943133 | 30726  | 1 | 0 | 3 | 0          | 0.30102999 | 1 | 2 | 0.30102999 | 0.08289318 |
| chr4 | 107943133 | 107943192 | 60     | 1 | 0 | 6 | 0          | 0.44141547 | 1 | 4 | 0.61140001 | 0.06713722 |
| chr4 | 107943192 | 107975509 | 32318  | 1 | 0 | 4 | 0          | 0.18734596 | 1 | 4 | 0.30102999 | 0.18734596 |
| chr4 | 107975509 | 108044509 | 69001  | 2 | 0 | 5 | 0          | 0.19510895 | 1 | 5 | 0.30102999 | 0.19510895 |
| chr4 | 108044509 | 108088649 | 44141  | 1 | 0 | 4 | 0          | 0.18734596 | 1 | 4 | 0.30102999 | 0.18734596 |
| chr4 | 108088649 | 108088708 | 60     | 1 | 0 | 4 | 0          | 0.11390336 | 1 | 5 | 0.30102999 | 0.30102999 |
| chr4 | 108088708 | 10834914  |        |   |   |   |            |            |   |   |            |            |

|      |           |           |        |    |   |            |            |            |   |            |            |            |
|------|-----------|-----------|--------|----|---|------------|------------|------------|---|------------|------------|------------|
| chr4 | 110461040 | 110546964 | 85925  | 2  | 0 | 8          | 0          | 0.58747015 | 3 | 5          | 0.93173516 | 0.04407651 |
| chr4 | 110546964 | 110547023 | 60     | 1  | 0 | 9          | 0          | 0.76806864 | 3 | 5          | 0.93173516 | 0.02473314 |
| chr4 | 110547023 | 110581353 | 34331  | 1  | 0 | 8          | 0          | 0.79906872 | 3 | 4          | 0.93173516 | 0.02074938 |
| chr4 | 110581353 | 110581412 | 60     | 1  | 0 | 8          | 0          | 0.58747015 | 3 | 5          | 0.93173516 | 0.04407651 |
| chr4 | 110581412 | 110641930 | 60519  | 4  | 0 | 8          | 0          | 0.79906872 | 3 | 4          | 0.93173516 | 0.02074938 |
| chr4 | 110641930 | 110723152 | 81223  | 2  | 0 | 7          | 0          | 0.60763643 | 3 | 4          | 0.93173516 | 0.03812622 |
| chr4 | 110723152 | 110723211 | 60     | 1  | 0 | 8          | 0          | 0.58747015 | 3 | 5          | 0.93173516 | 0.04407651 |
| chr4 | 110723211 | 110754405 | 31195  | 2  | 0 | 7          | 0          | 0.60763643 | 3 | 4          | 0.93173516 | 0.03812622 |
| chr4 | 110754405 | 110834202 | 79798  | 1  | 0 | 6          | 0          | 0.44141547 | 3 | 4          | 0.93173516 | 0.06713722 |
| chr4 | 110834202 | 110834261 | 60     | 1  | 0 | 7          | 0          | 0.60763643 | 3 | 4          | 0.93173516 | 0.03812622 |
| chr4 | 110834261 | 110970511 | 136251 | 4  | 0 | 7          | 0          | 0.60763643 | 2 | 4          | 0.61140001 | 0.03812622 |
| chr4 | 110970511 | 110980932 | 10422  | 2  | 0 | 8          | 0          | 0.58747015 | 2 | 5          | 0.61140001 | 0.04407651 |
| chr4 | 110980932 | 111084948 | 104017 | 3  | 0 | 7          | 0          | 0.43181735 | 2 | 5          | 0.61140001 | 0.07511598 |
| chr4 | 111084948 | 111085007 | 60     | 1  | 0 | 7          | 0          | 0.30102999 | 2 | 6          | 0.61140001 | 0.129913   |
| chr4 | 111085007 | 111119550 | 34544  | 1  | 0 | 6          | 0          | 0.30102999 | 2 | 5          | 0.61140001 | 0.12309572 |
| chr4 | 111119550 | 111254831 | 135282 | 2  | 0 | 6          | 0          | 0.44141547 | 2 | 4          | 0.61140001 | 0.06713722 |
| chr4 | 111254831 | 111254890 | 60     | 1  | 0 | 6          | 0          | 0.30102999 | 2 | 5          | 0.61140001 | 0.12309572 |
| chr4 | 111254890 | 111390285 | 135396 | 1  | 0 | 5          | 0          | 0.19510895 | 2 | 5          | 0.61140001 | 0.19510895 |
| chr4 | 111390285 | 111390344 | 60     | 1  | 0 | 5          | 0          | 0.12309572 | 2 | 6          | 0.61140001 | 0.30102999 |
| chr4 | 111390344 | 111482623 | 92280  | 2  | 0 | 5          | 0          | 0.45545077 | 1 | 3          | 0.30102999 | 0.05670724 |
| chr4 | 111482623 | 111544856 | 62234  | 2  | 0 | 5          | 0          | 0.30102999 | 1 | 4          | 0.30102999 | 0.11390336 |
| chr4 | 111544856 | 111548961 | 4125   | 1  | 0 | 3          | 0          | 0.10122019 | 1 | 4          | 0.30102999 | 0.30102999 |
| chr4 | 111548961 | 111559992 | 11012  | 3  | 0 | 3          | 0          | 0.10122019 | 2 | 4          | 0.61140001 | 0.30102999 |
| chr4 | 111559992 | 111782109 | 222118 | 2  | 0 | 3          | 0          | 0.10122019 | 1 | 4          | 0.30102999 | 0.30102999 |
| chr4 | 111782109 | 111812232 | 30124  | 2  | 0 | 5          | 0          | 0.19510895 | 1 | 5          | 0.30102999 | 0.19510895 |
| chr4 | 111812232 | 111938423 | 126192 | 1  | 0 | 3          | 0          | 0.10122019 | 1 | 4          | 0.30102999 | 0.30102999 |
| chr4 | 111938423 | 112077828 | 139406 | 1  | 0 | 3          | 0          | 0.10122019 | 0 | 4          | 0          | 0.30102999 |
| chr4 | 112077828 | 112077887 | 60     | 1  | 0 | 5          | 0          | 0.19510895 | 0 | 5          | 0          | 0.19510895 |
| chr4 | 112077887 | 112287659 | 209773 | 2  | 0 | 5          | 0          | 0.30102999 | 0 | 4          | 0          | 0.11390336 |
| chr4 | 112287659 | 112441994 | 154336 | 1  | 0 | 5          | 0          | 0.45545077 | 0 | 3          | 0          | 0.05670724 |
| chr4 | 112441994 | 112442053 | 60     | 1  | 0 | 5          | 0          | 0.45545077 | 1 | 3          | 0.30102999 | 0.05670724 |
| chr4 | 112442053 | 112598562 | 156510 | 1  | 0 | 4          | 0          | 0.30102999 | 0 | 3          | 0          | 0.10122019 |
| chr4 | 112598562 | 112598621 | 60     | 1  | 0 | 5          | 0          | 0.19510895 | 0 | 5          | 0          | 0.19510895 |
| chr4 | 112598621 | 112753564 | 154944 | 1  | 0 | 5          | 0          | 0.30102999 | 0 | 4          | 0          | 0.11390336 |
| chr4 | 112753564 | 112828683 | 75120  | 2  | 0 | 6          | 0          | 0.44141547 | 0 | 5          | 0          | 0.06713722 |
| chr4 | 112828683 | 112828742 | 60     | 1  | 0 | 6          | 0          | 0.30102999 | 0 | 5          | 0          | 0.12309572 |
| chr4 | 112828742 | 112979202 | 150461 | 1  | 0 | 6          | 0          | 0.44141547 | 0 | 4          | 0          | 0.06713722 |
| chr4 | 112979202 | 113069250 | 90049  | 2  | 1 | 6          | 0.30102999 | 0.44141547 | 0 | 4          | 0          | 0.06713722 |
| chr4 | 113069250 | 113069309 | 60     | 1  | 1 | 6          | 0.1218695  | 0.44141547 | 1 | 4          | 0.1218695  | 0.06713722 |
| chr4 | 113069309 | 113098795 | 29487  | 1  | 1 | 6          | 0.30102999 | 0.44141547 | 0 | 4          | 0          | 0.06713722 |
| chr4 | 113098795 | 113098854 | 60     | 1  | 1 | 6          | 0.1218695  | 0.44141547 | 1 | 4          | 0.1218695  | 0.06713722 |
| chr4 | 113098854 | 113200226 | 101373 | 2  | 1 | 5          | 0.1218695  | 0.30102999 | 1 | 4          | 0.1218695  | 0.11390336 |
| chr4 | 113200226 | 113249039 | 48814  | 2  | 1 | 6          | 0.05404976 | 0.44141547 | 2 | 4          | 0.30102999 | 0.06713722 |
| chr4 | 113249039 | 113292159 | 43121  | 2  | 1 | 6          | 0.05404976 | 0.30102999 | 2 | 5          | 0.30102999 | 0.12309572 |
| chr4 | 113292159 | 113375690 | 83532  | 2  | 1 | 6          | 0.05404976 | 0.44141547 | 2 | 4          | 0.30102999 | 0.06713722 |
| chr4 | 113375690 | 113462245 | 86556  | 3  | 1 | 5          | 0.02438896 | 0.30102999 | 3 | 5          | 0.51676182 | 0.12309572 |
| chr4 | 113462245 | 113462304 | 60     | 1  | 6 | 0.01091641 | 0.30102999 | 4          | 5 | 0.76005302 | 0.12309572 |            |
| chr4 | 113462304 | 113610439 | 148136 | 5  | 1 | 6          | 0.01091641 | 0.44141547 | 4 | 4          | 0.76005302 | 0.06713722 |
| chr4 | 113610439 | 113838424 | 227986 | 4  | 1 | 5          | 0.01091641 | 0.30102999 | 4 | 4          | 0.76005302 | 0.11390336 |
| chr4 | 113838424 | 113838483 | 60     | 1  | 1 | 7          | 0.01091641 | 0.43181735 | 4 | 5          | 0.76005302 | 0.07511598 |
| chr4 | 113838483 | 113908051 | 69569  | 1  | 1 | 7          | 0.01091641 | 0.60763643 | 4 | 4          | 0.76005302 | 0.03812622 |
| chr4 | 113908051 | 114153329 | 245279 | 6  | 1 | 5          | 0.01091641 | 0.30102999 | 4 | 4          | 0.76005302 | 0.11390336 |
| chr4 | 114153329 | 114153388 | 60     | 1  | 6 | 0.01091641 | 0.44141547 | 4          | 4 | 0.76005302 | 0.06713722 |            |
| chr4 | 114153388 | 114228114 | 74727  | 2  | 1 | 5          | 0.01091641 | 0.45545077 | 3 | 4          | 0.76005302 | 0.05670724 |
| chr4 | 114228114 | 114375455 | 147342 | 3  | 1 | 5          | 0.02438896 | 0.68214471 | 3 | 2          | 0.51676182 | 0.02162467 |
| chr4 | 114375455 | 114375514 | 60     | 1  | 5 | 0.02438896 | 0.45545077 | 3          | 3 | 0.45545077 | 0.05670724 |            |
| chr4 | 114375514 | 114530322 | 154809 | 4  | 0 | 5          | 0          | 0.45545077 | 3 | 3          | 0.93173516 | 0.05670724 |
| chr4 | 114530322 | 114530381 | 60     | 1  | 6 | 0          | 0.44141547 | 3          | 4 | 0.93173516 | 0.06713722 |            |
| chr4 | 114530381 | 114822723 | 292343 | 4  | 0 | 5          | 0.45545077 | 3          | 3 | 0.93173516 | 0.05670724 |            |
| chr4 | 114822723 | 114824166 | 1444   | 2  | 0 | 6          | 0.44141547 | 3          | 3 | 0.93173516 | 0.06713722 |            |
| chr4 | 114824166 | 114915647 | 91482  | 2  | 0 | 5          | 0.30102999 | 3          | 4 | 0.93173516 | 0.11390336 |            |
| chr4 | 114915647 | 115146765 | 231119 | 1  | 0 | 5          | 0.30102999 | 2          | 4 | 0.61140001 | 0.11390336 |            |
| chr4 | 115146765 | 115146824 | 60     | 1  | 0 | 6          | 0.30102999 | 2          | 5 | 0.61140001 | 0.12309572 |            |
| chr4 | 115146824 | 115313299 | 166476 | 1  | 0 | 5          | 0.45545077 | 1          | 3 | 0.30102999 | 0.05670724 |            |
| chr4 | 115313299 | 115531861 | 218563 | 2  | 0 | 4          | 0.30102999 | 1          | 3 | 0.30102999 | 0.10122019 |            |
| chr4 | 115531861 | 115565870 | 34010  | 2  | 0 | 5          | 0.45545077 | 1          | 3 | 0.30102999 | 0.05670724 |            |
| chr4 | 115565870 | 116194418 | 628549 | 10 | 0 | 4          | 0.30102999 | 1          | 3 | 0.30102999 | 0.10122019 |            |
| chr4 | 116194418 | 116194477 | 60     | 1  | 0 | 4          | 0          | 0.11390336 | 1 | 3          | 0.30102999 | 0.30102999 |
| chr4 | 116194477 | 116494580 | 300104 | 2  | 0 | 0          | 0.10122019 | 0          | 4 | 0          | 0.30102999 |            |
| chr4 | 116494580 | 116681173 | 186594 | 2  | 0 | 3          | 0.17593012 | 0          | 3 | 0          | 0.17593012 |            |
| chr4 | 116681173 | 116681232 | 60     | 1  | 0 | 3          | 0.10122019 | 0          | 4 | 0          | 0.30102999 |            |
| chr4 | 116681232 | 116833697 | 152466 | 1  | 0 | 1          | 0.02438896 | 0          | 3 | 0          | 0.51676182 |            |
| chr4 | 116833697 | 116913753 | 80057  | 1  | 0 | 1          | 0.05404976 | 0          | 0 | 0          | 0.30102999 |            |
| chr4 | 116913753 | 117064946 | 151194 | 1  | 0 | 1          | 0.1218695  | 0          | 1 | 0          | 0.1218695  |            |
| chr4 | 117064946 | 117212297 | 147352 | 1  | 0 | 0          | 0          | 0          | 1 | 0          | 0.30102999 |            |
| chr4 | 117212297 | 117466385 | 254089 | 3  | 0 | 0          | 0          | 0          | 0 | 0          | 0.61140001 |            |
| chr4 | 117466385 | 117676119 | 209735 | 3  | 0 | 0          | 0.1575501  | 0          | 2 | 0          | 0.1575501  |            |
| chr4 | 117676119 | 117676178 | 60     | 1  | 0 | 2          | 0.08289318 | 0          | 0 | 0          | 0.30102999 |            |
| chr4 | 117676178 | 118005405 | 329228 | 2  | 0 | 0          | 0.05404976 | 0          | 2 | 0          | 0.30102999 |            |
| chr4 | 118005405 | 118005464 | 60     | 1  | 0 | 3          | 0.10122019 | 0          | 4 | 0          | 0.30102999 |            |
| chr4 | 118005464 | 118097129 | 91666  | 1  | 0 | 0          | 0          | 0          | 0 | 0          | 1.26272838 |            |
| chr4 | 118097129 | 118165551 | 68423  | 2  | 0 | 1          | 0.01091641 | 0          | 0 | 0          | 0.76005302 |            |
| chr4 | 118165551 | 118165610 | 60     | 1  | 0 | 2          | 0.02162467 | 0          | 5 | 0          | 0.68214471 |            |
| chr4 | 118165610 | 118273037 | 107428 | 1  | 0 | 1          | 0.01091641 | 0          | 0 | 0          | 0.76005302 |            |
| chr4 | 118273037 | 118362538 | 89502  | 2  | 0 | 2          | 0.0429175  | 0          | 0 | 0          | 0.47744371 |            |
| chr4 | 118362538 | 118608253 | 245716 | 3  | 0 | 2          | 0.08289318 | 0          | 3 | 0          | 0.30102999 |            |
| chr4 | 118608253 | 118810256 | 202004 | 2  | 1 | 2          | 0.1218695  | 0.0429175  | 1 | 4          | 0.1218695  | 0.47744371 |
| chr4 | 118810256 | 118810315 | 60     | 1  | 1 | 3          | 0.1218695  | 0.10122019 | 1 | 4          | 0.1218695  | 0.30102999 |
| chr4 | 118810315 | 118926950 | 116636 | 1  | 2 | 2          | 0.1218695  | 0.08289318 | 1 | 3          | 0.1218695  | 0.30102999 |
| chr4 | 118926950 | 119026148 | 91919  | 1  | 2 | 2          | 0.05404976 | 0.08289318 | 2 | 3          | 0.30102999 | 0.30102999 |
| chr4 | 119026148 | 119256687 | 230540 | 4  | 1 | 2          | 0.05404976 | 0.0429175  | 2 | 4          | 0.30102999 | 0.47744371 |
| chr4 | 119256687 | 119461777 | 205091 | 3  | 1 | 3          | 0.05404976 | 0.10122019 | 2 | 4          | 0.30102999 | 0.30102999 |
| chr4 | 119461777 | 119606253 | 144477 | 3  | 0 | 3          | 0.05404976 | 0.05670724 | 2 | 5          | 0.30102999 | 0.45545077 |
| chr4 | 119606253 | 119631970 | 25718  | 1  | 4 | 4          | 0.05404976 | 0.11390336 | 3 | 5          | 0.30102999 | 0.30102999 |
| chr4 | 119631970 | 119854428 | 222459 | 7  | 2 | 4          | 0.08289318 | 0.11390336 | 3 | 5          | 0.30102999 | 0.30102999 |
| chr4 | 119854428 | 119949827 | 95400  | 2  | 2 | 3          | 0.08289318 | 0.05670724 | 3 | 5          | 0.30102999 | 0.45545077 |
| chr4 | 119949827 | 120003254 | 53428  | 1  |   |            |            |            |   |            |            |            |

|      |           |           |        |   |   |   |            |            |   |            |            |            |
|------|-----------|-----------|--------|---|---|---|------------|------------|---|------------|------------|------------|
| chr4 | 122791428 | 122791483 | 56     | 1 | 0 | 5 | 0          | 0.19510895 | 6 | 5          | 1.95986592 | 0.19510895 |
| chr4 | 122791483 | 122821223 | 29741  | 1 | 0 | 5 | 0          | 0.19510895 | 4 | 5          | 1.26272838 | 0.19510895 |
| chr4 | 122821223 | 123068008 | 246786 | 5 | 1 | 5 | 0.01091641 | 0.19510895 | 4 | 5          | 0.76005302 | 0.19510895 |
| chr4 | 123068008 | 123283775 | 215768 | 7 | 1 | 6 | 0.01091641 | 0.30102999 | 4 | 5          | 0.76005302 | 0.12309572 |
| chr4 | 123283775 | 123423512 | 139738 | 3 | 1 | 6 | 0.01091641 | 0.44141547 | 4 | 4          | 0.76005302 | 0.06713722 |
| chr4 | 123423512 | 123423571 | 60     | 1 | 1 | 6 | 0.01091641 | 0.30102999 | 4 | 5          | 0.76005302 | 0.12309572 |
| chr4 | 123423571 | 123534022 | 110452 | 1 | 1 | 6 | 0.01091641 | 0.44141547 | 4 | 4          | 0.76005302 | 0.06713722 |
| chr4 | 123534022 | 123539291 | 5270   | 2 | 1 | 7 | 0.01091641 | 0.60763643 | 4 | 4          | 0.76005302 | 0.03812622 |
| chr4 | 123539291 | 123632308 | 93018  | 1 | 1 | 6 | 0.02438896 | 0.44141547 | 3 | 4          | 0.51676182 | 0.06713722 |
| chr4 | 123632308 | 123664642 | 32335  | 2 | 1 | 6 | 0.02438896 | 0.63695542 | 3 | 3          | 0.51676182 | 0.03070643 |
| chr4 | 123664642 | 123753909 | 89268  | 1 | 1 | 4 | 0.02438896 | 0.30102999 | 3 | 3          | 0.51676182 | 0.10122019 |
| chr4 | 123753909 | 123753968 | 60     | 1 | 2 | 4 | 0.0429175  | 0.30102999 | 4 | 3          | 0.47744371 | 0.10122019 |
| chr4 | 123753968 | 123949660 | 195693 | 6 | 2 | 4 | 0.08289118 | 0.30102999 | 3 | 3          | 0.30102999 | 0.10122019 |
| chr4 | 123949660 | 124093635 | 143976 | 3 | 2 | 4 | 0.08289118 | 0.47744371 | 3 | 2          | 0.30102999 | 0.0429175  |
| chr4 | 124093635 | 124177218 | 83584  | 2 | 2 | 3 | 0.08289118 | 0.30102999 | 3 | 2          | 0.30102999 | 0.08289118 |
| chr4 | 124177218 | 124669993 | 492776 | 7 | 1 | 3 | 0.02438896 | 0.30102999 | 3 | 2          | 0.51676182 | 0.08289118 |
| chr4 | 124669993 | 124737537 | 67545  | 2 | 1 | 5 | 0.02438896 | 0.68214471 | 3 | 2          | 0.51676182 | 0.02162467 |
| chr4 | 124737537 | 124851620 | 114084 | 1 | 0 | 1 | 0          | 0.05404976 | 0 | 2          | 0.93173516 | 0.30102999 |
| chr4 | 124851620 | 124976418 | 124799 | 1 | 0 | 1 | 0          | 0.1218695  | 1 | 2          | 0.61140001 | 0.1218695  |
| chr4 | 124976418 | 125079051 | 102634 | 1 | 0 | 1 | 0          | 0.1218695  | 1 | 1          | 0.30102999 | 0.1218695  |
| chr4 | 125079051 | 125224636 | 145586 | 1 | 0 | 0 | 0          | 0          | 1 | 1          | 0.30102999 | 0.30102999 |
| chr4 | 125224636 | 125224695 | 60     | 1 | 2 | 0 | 0          | 0.1575501  | 0 | 1          | 0.30102999 | 0.30102999 |
| chr4 | 125224695 | 125437394 | 212700 | 3 | 1 | 0 | 0.05404976 | 0          | 2 | 1          | 0.30102999 | 0.30102999 |
| chr4 | 125437394 | 125437453 | 60     | 1 | 2 | 0 | 0          | 0.1575501  | 0 | 2          | 0.30102999 | 0.30102999 |
| chr4 | 125437453 | 125631656 | 194204 | 3 | 0 | 0 | 0          | 0          | 2 | 1          | 0.61140001 | 0.30102999 |
| chr4 | 125631656 | 125631715 | 60     | 1 | 0 | 0 | 0.05404976 | 0          | 2 | 2          | 0.30102999 | 0.61140001 |
| chr4 | 125631715 | 126039775 | 408061 | 3 | 0 | 0 | 0          | 0          | 2 | 2          | 0.61140001 | 0.61140001 |
| chr4 | 126039775 | 126308658 | 268884 | 5 | 0 | 1 | 0          | 0.05404976 | 2 | 2          | 0.61140001 | 0.30102999 |
| chr4 | 126308658 | 126308717 | 60     | 1 | 0 | 1 | 0          | 0.05404976 | 3 | 2          | 0.93173516 | 0.30102999 |
| chr4 | 126308717 | 126582726 | 274010 | 4 | 0 | 0 | 0          | 0          | 2 | 2          | 0.61140001 | 0.61140001 |
| chr4 | 126582726 | 126582785 | 60     | 1 | 0 | 0 | 0          | 0          | 3 | 2          | 0.93173516 | 0.61140001 |
| chr4 | 126582785 | 126615813 | 33029  | 1 | 0 | 0 | 0          | 0          | 1 | 2          | 0.30102999 | 0.61140001 |
| chr4 | 126615813 | 126695127 | 79315  | 2 | 0 | 1 | 0          | 0.05404976 | 1 | 2          | 0.30102999 | 0.30102999 |
| chr4 | 126695127 | 127096729 | 401603 | 2 | 0 | 1 | 0          | 0.05404976 | 0 | 2          | 0.30102999 | 0.30102999 |
| chr4 | 127096729 | 127252263 | 155535 | 2 | 0 | 1 | 0          | 0.05404976 | 1 | 2          | 0.30102999 | 0.30102999 |
| chr4 | 127252263 | 127453132 | 200870 | 1 | 0 | 1 | 0          | 0.1218695  | 0 | 1          | 0.1218695  | 0.1218695  |
| chr4 | 127453132 | 12722426  | 269295 | 3 | 0 | 1 | 0          | 0.05404976 | 0 | 2          | 0.30102999 | 0.30102999 |
| chr4 | 12722426  | 12722485  | 60     | 1 | 0 | 2 | 0          | 0.0429175  | 0 | 4          | 0          | 0.47744371 |
| chr4 | 12722485  | 127837499 | 115015 | 1 | 0 | 2 | 0          | 0.08289118 | 0 | 3          | 0          | 0.30102999 |
| chr4 | 127837499 | 127936558 | 99060  | 1 | 0 | 2 | 0          | 0.1575501  | 0 | 2          | 0          | 0.1575501  |
| chr4 | 127936558 | 127994626 | 58069  | 2 | 0 | 2 | 0          | 0.08289118 | 1 | 3          | 0.30102999 | 0.30102999 |
| chr4 | 127994626 | 128056015 | 61390  | 2 | 0 | 3 | 0          | 0.05670724 | 1 | 5          | 0.30102999 | 0.45545077 |
| chr4 | 128056015 | 128056074 | 60     | 1 | 0 | 4 | 0          | 0.11390336 | 1 | 5          | 0.30102999 | 0.30102999 |
| chr4 | 128056074 | 128249974 | 193901 | 1 | 0 | 2 | 0          | 0.1575501  | 1 | 2          | 0.30102999 | 0.1575501  |
| chr4 | 128249974 | 128406045 | 156072 | 2 | 0 | 2 | 0          | 0.1575501  | 2 | 2          | 0.61140001 | 0.1575501  |
| chr4 | 128406045 | 128406104 | 60     | 1 | 1 | 3 | 0.05404976 | 0.17593012 | 2 | 3          | 0.30102999 | 0.17593012 |
| chr4 | 128406104 | 128559394 | 153291 | 2 | 1 | 1 | 0.1218695  | 0.1218695  | 1 | 1          | 0.1218695  | 0.1218695  |
| chr4 | 128559394 | 128590322 | 30929  | 2 | 1 | 3 | 0.1218695  | 0.17593012 | 1 | 3          | 0.1218695  | 0.17593012 |
| chr4 | 128590322 | 128658605 | 68284  | 2 | 1 | 1 | 0.1218695  | 0.1218695  | 1 | 1          | 0.1218695  | 0.1218695  |
| chr4 | 128658605 | 128710070 | 51466  | 3 | 1 | 2 | 0.05404976 | 0.08289118 | 3 | 3          | 0.30102999 | 0.30102999 |
| chr4 | 128710070 | 128776518 | 66449  | 1 | 1 | 1 | 0.05404976 | 0.02438896 | 3 | 3          | 0.30102999 | 0.51676182 |
| chr4 | 128776518 | 128807193 | 30676  | 1 | 0 | 1 | 0          | 0.02438896 | 2 | 3          | 0.61140001 | 0.51676182 |
| chr4 | 128807193 | 128854159 | 46967  | 4 | 0 | 2 | 0          | 0.02162467 | 2 | 5          | 0.61140001 | 0.68214471 |
| chr4 | 128854159 | 128901636 | 47478  | 2 | 0 | 0 | 0          | 0.05670724 | 2 | 5          | 0.61140001 | 0.45545077 |
| chr4 | 128901636 | 128901695 | 60     | 1 | 0 | 3 | 0          | 0.01598258 | 2 | 7          | 0.61140001 | 0.84395715 |
| chr4 | 128901695 | 128949664 | 47970  | 1 | 0 | 2 | 0          | 0.00493743 | 2 | 7          | 0.61140001 | 1.16581773 |
| chr4 | 128949664 | 128981343 | 31680  | 1 | 0 | 2 | 0          | 0.01053319 | 2 | 6          | 0.61140001 | 0.91219088 |
| chr4 | 128981343 | 129258959 | 277617 | 7 | 0 | 3 | 0          | 0.03070643 | 2 | 6          | 0.61140001 | 0.63695542 |
| chr4 | 129258959 | 129631786 | 372828 | 5 | 0 | 3 | 0          | 0.03070643 | 3 | 6          | 0.93173516 | 0.63695542 |
| chr4 | 129631786 | 129631845 | 60     | 1 | 1 | 3 | 0.02438896 | 0.03070643 | 3 | 6          | 0.63695542 | 0.63695542 |
| chr4 | 129631845 | 129688570 | 56726  | 1 | 2 | 2 | 0.02438896 | 0.01053319 | 3 | 6          | 0.51676182 | 0.91219088 |
| chr4 | 129688570 | 129857933 | 169364 | 5 | 1 | 2 | 0.05404976 | 0.0429175  | 4 | 4          | 0.30102999 | 0.47744371 |
| chr4 | 129857933 | 129920976 | 63044  | 2 | 1 | 2 | 0.05404976 | 0.02162467 | 2 | 5          | 0.30102999 | 0.68214471 |
| chr4 | 129920976 | 129965196 | 44221  | 1 | 2 | 2 | 0.05404976 | 0.0429175  | 2 | 4          | 0.30102999 | 0.47744371 |
| chr4 | 129965196 | 130204489 | 239294 | 3 | 0 | 2 | 0          | 0.08289118 | 0 | 3          | 0          | 0.30102999 |
| chr4 | 130204489 | 130677429 | 472941 | 4 | 0 | 3 | 0          | 0.02162467 | 0 | 5          | 0          | 0.68214471 |
| chr4 | 130677429 | 130746617 | 69189  | 2 | 0 | 0 | 0          | 0.05670724 | 0 | 0          | 0.45545077 | 0.45545077 |
| chr4 | 130746617 | 130746676 | 60     | 1 | 0 | 3 | 0          | 0.03070643 | 0 | 0          | 0.63695542 | 0.63695542 |
| chr4 | 130746676 | 130791586 | 44911  | 1 | 0 | 1 | 0          | 0.01091641 | 4 | 4          | 0.76005302 | 0.76005302 |
| chr4 | 130791586 | 130946954 | 155369 | 2 | 0 | 1 | 0          | 0.02438896 | 0 | 3          | 0          | 0.51676182 |
| chr4 | 131400699 | 131645763 | 245065 | 3 | 0 | 0 | 0          | 0          | 2 | 0          | 0.61140001 | 0.61140001 |
| chr4 | 131645763 | 131916402 | 270640 | 1 | 0 | 0 | 0          | 0          | 0 | 1          | 0.30102999 | 0.30102999 |
| chr4 | 132962005 | 133803315 | 841311 | 6 | 0 | 0 | 0          | 0          | 1 | 0          | 0.30102999 | 0.30102999 |
| chr4 | 133803315 | 133939036 | 135722 | 2 | 0 | 1 | 0          | 0.05404976 | 0 | 2          | 0          | 0.30102999 |
| chr4 | 133939036 | 134207962 | 268927 | 3 | 0 | 0 | 0          | 0          | 0 | 1          | 0          | 0.30102999 |
| chr4 | 134207962 | 134396504 | 188543 | 2 | 0 | 1 | 0          | 0.05404976 | 0 | 2          | 0          | 0.30102999 |
| chr4 | 134396504 | 134635512 | 239009 | 2 | 0 | 0 | 0          | 0          | 0 | 2          | 0          | 0.61140001 |
| chr4 | 134635512 | 134766607 | 131096 | 2 | 0 | 1 | 0          | 0.01091641 | 0 | 4          | 0          | 0.76005302 |
| chr4 | 134766607 | 134889916 | 123310 | 1 | 0 | 0 | 0          | 0          | 0 | 4          | 0          | 1.26272838 |
| chr4 | 134889916 | 134889975 | 60     | 1 | 0 | 0 | 0          | 0          | 0 | 5          | 0          | 1.60515106 |
| chr4 | 134889975 | 135023283 | 133309 | 1 | 0 | 0 | 0          | 0          | 0 | 4          | 0          | 1.26272838 |
| chr4 | 135023283 | 135137668 | 114386 | 1 | 0 | 0 | 0          | 0          | 0 | 3          | 0          | 0.93173516 |
| chr4 | 135137668 | 135347297 | 60     | 1 | 0 | 0 | 0          | 0          | 0 | 3          | 0          | 0.93173516 |
| chr4 | 135347297 | 135992638 | 645342 | 4 | 0 | 0 | 0          | 0          | 0 | 2          | 0          | 0.61140001 |
| chr4 | 135992638 | 136277833 | 285196 | 2 | 0 | 0 | 0          | 0          | 0 | 1          | 0          | 0.30102999 |
| chr4 | 136277833 | 136421727 | 143895 | 3 | 0 | 0 | 0          | 0          | 3 | 1          | 0.93173516 | 0.30102999 |
| chr4 | 136421727 | 136587298 | 165572 | 2 | 0 | 0 | 0          | 0          | 4 | 1          | 1.26272838 | 0.30102999 |
| chr4 | 136587298 | 136912336 | 325039 | 3 | 0 | 0 | 0          | 0          | 4 | 2          | 1.26272838 | 0.61140001 |
| chr4 | 136912336 | 137197947 | 285612 | 4 | 0 | 1 | 0.05404976 | 0          | 4 | 2          | 1.26272838 | 0.30102999 |
| chr4 | 137197947 | 137460908 | 262962 | 2 | 0 | 1 | 0.05404976 | 0          | 2 | 2          | 0.61140001 | 0.30102999 |
| chr4 | 137460908 | 137815553 | 354646 | 2 | 0 | 1 | 0.05404976 | 0          | 2 | 2          | 0.30102999 | 0.30102999 |
| chr4 | 137815553 | 137815612 | 60     | 1 | 0 | 1 | 0.01091641 | 5          | 4 | 1.60515106 | 0.76005302 |            |
| chr4 | 137815612 | 138128986 | 313375 | 2 | 0 | 1 | 0.1218695  | 2          | 1 | 0.61140001 | 0.1218695  |            |
| chr4 | 138128986 | 138129045 | 60     | 1 | 0 | 1 | 0.01091641 | 3          | 4 | 0.93173516 | 0.76005302 |            |
| chr4 | 138129045 | 138324113 | 195069 | 1 | 0 | 0 | 0          | 0          | 3 | 1          | 0.93173516 | 0.30102999 |
| chr4 | 138324113 | 138441850 | 117738 | 2 | 0 | 0 | 0          | 0          | 3 |            |            |            |

|      |           |           |        |   |   |   |            |            |   |   |            |            |
|------|-----------|-----------|--------|---|---|---|------------|------------|---|---|------------|------------|
| chr4 | 140281998 | 140427323 | 145326 | 3 | 0 | 0 | 0          | 0          | 5 | 1 | 1.60515106 | 0.30102999 |
| chr4 | 140427323 | 140427382 | 60     | 1 | 0 | 2 | 0          | 0.1575501  | 5 | 2 | 1.60515106 | 0.1575501  |
| chr4 | 140427382 | 140532854 | 105473 | 3 | 0 | 1 | 0          | 0.1218695  | 5 | 1 | 1.60515106 | 0.1218695  |
| chr4 | 140532854 | 140532913 | 60     | 1 | 0 | 2 | 0          | 0.1575501  | 5 | 2 | 1.60515106 | 0.1575501  |
| chr4 | 140532913 | 140625423 | 92511  | 2 | 0 | 1 | 0          | 0.1218695  | 5 | 1 | 1.60515106 | 0.1218695  |
| chr4 | 140625423 | 140639077 | 13655  | 1 | 0 | 0 | 0          | 0          | 5 | 1 | 1.60515106 | 0.30102999 |
| chr4 | 140639077 | 140715344 | 76268  | 2 | 5 | 1 | 0          | 0.1218695  | 5 | 1 | 1.60515106 | 0.1218695  |
| chr4 | 140715344 | 140810126 | 94783  | 3 | 0 | 1 | 0          | 0.1218695  | 6 | 1 | 1.95986592 | 0.1218695  |
| chr4 | 140810126 | 140885078 | 74953  | 1 | 5 | 0 | 0          | 0.1218695  | 5 | 1 | 1.60515106 | 0.1218695  |
| chr4 | 140885078 | 140965269 | 80192  | 3 | 0 | 3 | 0          | 0.51676182 | 5 | 1 | 1.60515106 | 0.02438896 |
| chr4 | 140965269 | 141008421 | 43153  | 1 | 0 | 2 | 0          | 0.30102999 | 5 | 1 | 1.60515106 | 0.05404976 |
| chr4 | 141008421 | 141068980 | 60560  | 2 | 0 | 2 | 0          | 0.30102999 | 6 | 1 | 1.95986592 | 0.05404976 |
| chr4 | 141068980 | 141074868 | 5889   | 2 | 0 | 3 | 0          | 0.51676182 | 6 | 1 | 1.95986592 | 0.02438896 |
| chr4 | 141074868 | 141177144 | 102277 | 1 | 0 | 2 | 0          | 0.30102999 | 6 | 1 | 1.95986592 | 0.05404976 |
| chr4 | 141177144 | 141177203 | 60     | 1 | 0 | 3 | 0          | 0.30102999 | 6 | 2 | 1.95986592 | 0.08289318 |
| chr4 | 141177203 | 141205615 | 28413  | 1 | 0 | 2 | 0          | 0.30102999 | 6 | 1 | 1.95986592 | 0.05404976 |
| chr4 | 141205615 | 141425400 | 219786 | 7 | 0 | 1 | 0          | 0.1218695  | 6 | 1 | 1.95986592 | 0.1218695  |
| chr4 | 141425400 | 141471387 | 45988  | 1 | 0 | 1 | 0          | 0.30102999 | 6 | 0 | 1.95986592 | 0          |
| chr4 | 141471387 | 141481076 | 9690   | 2 | 1 | 1 | 0.00204627 | 0.1218695  | 6 | 1 | 1.31360226 | 0.1218695  |
| chr4 | 141481076 | 141481133 | 57     | 1 | 1 | 1 | 0.00204627 | 0.05404976 | 6 | 2 | 1.31360226 | 0.30102999 |
| chr4 | 141481133 | 141554854 | 73723  | 1 | 0 | 1 | 0          | 0.1218695  | 6 | 1 | 1.95986592 | 0.1218695  |
| chr4 | 141554854 | 141781182 | 236329 | 3 | 0 | 1 | 0          | 0.1218695  | 5 | 1 | 1.60515106 | 0.1218695  |
| chr4 | 141781182 | 141818146 | 36965  | 1 | 0 | 0 | 0          | 0          | 5 | 1 | 1.60515106 | 0.30102999 |
| chr4 | 141818146 | 141873736 | 55591  | 1 | 0 | 0 | 0          | 0          | 5 | 0 | 1.60515106 | 0          |
| chr4 | 141873736 | 142049839 | 176104 | 4 | 0 | 1 | 0          | 0.30102999 | 5 | 0 | 1.60515106 | 0          |
| chr4 | 142049839 | 142127120 | 77282  | 2 | 0 | 3 | 0          | 0.93173516 | 5 | 0 | 1.60515106 | 0          |
| chr4 | 142127120 | 142155315 | 28196  | 3 | 0 | 4 | 0          | 0.47744371 | 5 | 2 | 1.60515106 | 0.0429175  |
| chr4 | 142155315 | 142194513 | 39199  | 3 | 0 | 4 | 0          | 0.76005302 | 5 | 1 | 1.60515106 | 0.01091641 |
| chr4 | 142194513 | 142194572 | 60     | 1 | 0 | 5 | 0          | 1.02643191 | 5 | 1 | 1.60515106 | 0.00478973 |
| chr4 | 142194572 | 142274902 | 80331  | 1 | 0 | 4 | 0          | 0.76005302 | 5 | 1 | 1.60515106 | 0.01091641 |
| chr4 | 142274902 | 142274961 | 60     | 1 | 0 | 4 | 0          | 0.11390336 | 5 | 5 | 1.60515106 | 0.30102999 |
| chr4 | 142274961 | 142602182 | 327222 | 2 | 0 | 4 | 0          | 0.47744371 | 5 | 2 | 1.60515106 | 0.0429175  |
| chr4 | 142602182 | 142602241 | 60     | 1 | 0 | 4 | 0          | 0.11390336 | 5 | 5 | 1.60515106 | 0.30102999 |
| chr4 | 142602241 | 142654058 | 51818  | 1 | 0 | 4 | 0          | 0.30102999 | 5 | 3 | 1.60515106 | 0.10122019 |
| chr4 | 142654058 | 142676976 | 22919  | 2 | 0 | 5 | 0          | 0.45545077 | 5 | 3 | 1.60515106 | 0.05670724 |
| chr4 | 142676976 | 142845871 | 168896 | 1 | 0 | 4 | 0          | 0.47744371 | 5 | 2 | 1.60515106 | 0.0429175  |
| chr4 | 142845871 | 142941573 | 95703  | 2 | 0 | 4 | 0          | 0.30102999 | 5 | 3 | 1.60515106 | 0.10122019 |
| chr4 | 142941573 | 143003352 | 61780  | 3 | 0 | 5 | 0          | 0.45545077 | 5 | 3 | 1.60515106 | 0.05670724 |
| chr4 | 143003352 | 143159084 | 155733 | 3 | 0 | 4 | 0          | 0.47744371 | 5 | 2 | 1.60515106 | 0.0429175  |
| chr4 | 143159084 | 143195842 | 36759  | 2 | 0 | 6 | 0          | 0.91219088 | 5 | 2 | 1.60515106 | 0.01053319 |
| chr4 | 143195842 | 143195901 | 60     | 1 | 0 | 6 | 0          | 0.63695542 | 5 | 3 | 1.60515106 | 0.03070643 |
| chr4 | 143195901 | 143324115 | 128215 | 3 | 0 | 5 | 0          | 0.45545077 | 5 | 3 | 1.60515106 | 0.05670724 |
| chr4 | 143324115 | 143324174 | 60     | 1 | 0 | 5 | 0          | 0.30102999 | 5 | 4 | 1.60515106 | 0.11390336 |
| chr4 | 143324174 | 143435290 | 111117 | 2 | 0 | 4 | 0          | 0.30102999 | 5 | 3 | 1.60515106 | 0.10122019 |
| chr4 | 143435290 | 143479103 | 43814  | 2 | 0 | 5 | 0          | 0.45545077 | 5 | 3 | 1.60515106 | 0.05670724 |
| chr4 | 143479103 | 143479162 | 60     | 1 | 0 | 6 | 0          | 0.30102999 | 5 | 5 | 1.60515106 | 0.12309572 |
| chr4 | 143479162 | 143585146 | 105985 | 2 | 0 | 6 | 0          | 0.44141547 | 5 | 4 | 1.60515106 | 0.06713722 |
| chr4 | 143585146 | 143652628 | 67483  | 3 | 0 | 6 | 0          | 0.30102999 | 5 | 5 | 1.60515106 | 0.12309572 |
| chr4 | 143652628 | 143784539 | 131912 | 3 | 0 | 6 | 0          | 0.63695542 | 5 | 3 | 1.60515106 | 0.03070643 |
| chr4 | 143784539 | 143884358 | 99820  | 2 | 0 | 6 | 0          | 0.20064824 | 6 | 2 | 1.60515106 | 0.20064824 |
| chr4 | 143884358 | 144108953 | 224596 | 2 | 0 | 4 | 0          | 0.30102999 | 5 | 3 | 1.60515106 | 0.10122019 |
| chr4 | 144108953 | 144134794 | 25842  | 3 | 1 | 6 | 0.00478973 | 0.63695542 | 5 | 3 | 1.02643191 | 0.03070643 |
| chr4 | 144134794 | 144212055 | 77262  | 1 | 0 | 4 | 0          | 0.30102999 | 5 | 3 | 1.60515106 | 0.10122019 |
| chr4 | 144212055 | 144212114 | 60     | 1 | 0 | 4 | 0          | 0.30102999 | 6 | 3 | 1.95986592 | 0.10122019 |
| chr4 | 144212114 | 144336861 | 124748 | 3 | 0 | 4 | 0          | 0.30102999 | 5 | 3 | 1.60515106 | 0.10122019 |
| chr4 | 144336861 | 144588607 | 251747 | 7 | 0 | 4 | 0          | 0.47744371 | 2 | 1 | 1.60515106 | 0.0429175  |
| chr4 | 144588607 | 144659362 | 70756  | 2 | 1 | 4 | 0.00478973 | 0.47744371 | 5 | 2 | 1.02643191 | 0.0429175  |
| chr4 | 144659362 | 144744584 | 85223  | 2 | 1 | 4 | 0.00478973 | 0.30102999 | 5 | 2 | 1.02643191 | 0.10122019 |
| chr4 | 144744584 | 144842647 | 98064  | 2 | 1 | 5 | 0.00478973 | 0.12309572 | 5 | 3 | 1.02643191 | 0.30102999 |
| chr4 | 144842647 | 145096624 | 253978 | 5 | 1 | 4 | 0.00478973 | 0.06713722 | 6 | 6 | 1.02643191 | 0.44141547 |
| chr4 | 145096624 | 145096683 | 60     | 1 | 2 | 4 | 0.02162467 | 0.06713722 | 6 | 5 | 0.68214471 | 0.44141547 |
| chr4 | 145096683 | 145188628 | 91946  | 1 | 2 | 4 | 0.0429175  | 0.11390336 | 4 | 5 | 0.47744371 | 0.30102999 |
| chr4 | 145188628 | 145275116 | 86489  | 2 | 2 | 5 | 0.0429175  | 0.19510895 | 4 | 5 | 0.47744371 | 0.19510895 |
| chr4 | 145275116 | 145413845 | 138730 | 1 | 1 | 5 | 0.01091641 | 0.19510895 | 5 | 5 | 0.76005302 | 0.19510895 |
| chr4 | 145413845 | 145581078 | 167234 | 3 | 1 | 5 | 0.01091641 | 0.12309572 | 4 | 1 | 0.76005302 | 0.30102999 |
| chr4 | 145581078 | 145633141 | 52064  | 2 | 1 | 4 | 0.01091641 | 0.11390336 | 4 | 5 | 0.76005302 | 0.30102999 |
| chr4 | 145633141 | 145659615 | 26475  | 3 | 1 | 5 | 0.01091641 | 0.12309572 | 4 | 4 | 0.76005302 | 0.30102999 |
| chr4 | 145659615 | 145923269 | 263655 | 3 | 1 | 4 | 0.01091641 | 0.11390336 | 4 | 4 | 0.76005302 | 0.30102999 |
| chr4 | 145923269 | 145963820 | 40552  | 1 | 4 | 4 | 0.01091641 | 0.06713722 | 4 | 4 | 0.76005302 | 0.44141547 |
| chr4 | 145963820 | 145963879 | 60     | 1 | 1 | 5 | 0.01091641 | 0.12309572 | 4 | 4 | 0.76005302 | 0.30102999 |
| chr4 | 145963879 | 146029280 | 65402  | 1 | 1 | 4 | 0.01091641 | 0.06713722 | 4 | 4 | 0.76005302 | 0.44141547 |
| chr4 | 146029280 | 146091590 | 62311  | 3 | 1 | 4 | 0.02438986 | 0.06713722 | 6 | 6 | 0.51676182 | 0.44141547 |
| chr4 | 146091590 | 146123562 | 31973  | 2 | 1 | 4 | 0.01091641 | 0.06713722 | 4 | 6 | 0.76005302 | 0.44141547 |
| chr4 | 146123562 | 146401995 | 278434 | 2 | 1 | 4 | 0.02438986 | 0.06713722 | 3 | 6 | 0.51676182 | 0.44141547 |
| chr4 | 146401995 | 146402054 | 60     | 1 | 2 | 4 | 0.0429175  | 0.06713722 | 4 | 6 | 0.47744371 | 0.44141547 |
| chr4 | 146402054 | 146435581 | 33528  | 1 | 1 | 4 | 0.02438986 | 0.06713722 | 3 | 6 | 0.51676182 | 0.44141547 |
| chr4 | 146435581 | 146560672 | 125092 | 4 | 1 | 5 | 0.02438986 | 0.07511598 | 3 | 7 | 0.51676182 | 0.43181735 |
| chr4 | 146560672 | 146560731 | 60     | 1 | 2 | 6 | 0.0429175  | 0.08122616 | 8 | 6 | 0.47744371 | 0.4250187  |
| chr4 | 146560731 | 146658315 | 97585  | 2 | 2 | 4 | 0.0429175  | 0.06713722 | 4 | 4 | 0.47744371 | 0.44141547 |
| chr4 | 146658315 | 146744613 | 86299  | 2 | 2 | 4 | 0.08289318 | 0.06713722 | 6 | 6 | 0.30102999 | 0.44141547 |
| chr4 | 146744613 | 146791626 | 47014  | 2 | 2 | 6 | 0.0429175  | 0.129913   | 7 | 7 | 0.47744371 | 0.30102999 |
| chr4 | 146791626 | 146823886 | 32261  | 1 | 2 | 5 | 0.0429175  | 0.12309572 | 4 | 6 | 0.47744371 | 0.30102999 |
| chr4 | 146823886 | 146865223 | 41338  | 1 | 2 | 5 | 0.08289318 | 0.12309572 | 3 | 6 | 0.30102999 | 0.30102999 |
| chr4 | 146865223 | 146931478 | 66256  | 2 | 2 | 7 | 0.0429175  | 0.20469099 | 4 | 7 | 0.47744371 | 0.20469099 |
| chr4 | 146931478 | 146931537 | 60     | 1 | 3 | 7 | 0.10122019 | 0.20469099 | 4 | 7 | 0.30102999 | 0.20469099 |
| chr4 | 146931537 | 147044764 | 113228 | 2 | 2 | 6 | 0.08289318 | 0.30102999 | 5 | 5 | 0.30102999 | 0.12309572 |
| chr4 | 147044764 | 147044823 | 60     | 1 | 2 | 7 | 0.08289318 | 0.43181735 | 3 | 5 | 0.30102999 | 0.07511598 |
| chr4 | 147044823 | 147096418 | 51596  | 2 | 2 | 5 | 0.08289318 | 0.30102999 | 3 | 4 | 0.30102999 | 0.11390336 |
| chr4 | 147096418 | 147096477 | 60     | 1 | 3 | 7 | 0.17593012 | 0.43181735 | 3 | 5 | 0.17593012 | 0.07511598 |
| chr4 | 147096477 | 147215062 | 118586 | 3 | 2 | 4 | 0.1575501  | 0.11390336 | 2 | 5 | 0.1575501  | 0.30102999 |
| chr4 | 147215062 | 147265444 | 50383  | 3 | 3 | 4 | 0.30102999 | 0.11390336 | 2 | 5 | 0.08289318 | 0.30102999 |
| chr4 | 147265444 | 147362825 | 97382  | 3 | 3 | 7 | 0.30102999 | 0.30102999 | 2 | 6 | 0.08289318 | 0.129913   |
| chr4 | 147362825 | 147397047 | 34223  | 2 | 3 | 8 | 0.30102999 | 0.425018   |   |   |            |            |

|      |           |           |        |   |   |   |            |            |   |   |            |            |
|------|-----------|-----------|--------|---|---|---|------------|------------|---|---|------------|------------|
| chr4 | 149245228 | 149245287 | 60     | 1 | 1 | 7 | 0.05404976 | 0.13499366 | 2 | 8 | 0.30102999 | 0.30102999 |
| chr4 | 149245287 | 149284619 | 39333  | 1 | 1 | 6 | 0.05404976 | 0.129913   | 2 | 7 | 0.30102999 | 0.30102999 |
| chr4 | 149284619 | 149467140 | 182522 | 2 | 2 | 5 | 0.05404976 | 0.07511598 | 2 | 7 | 0.30102999 | 0.43181735 |
| chr4 | 149467140 | 149555306 | 88167  | 1 | 1 | 3 | 0.05404976 | 0.03070643 | 1 | 3 | 0.30102999 | 0.63695542 |
| chr4 | 149555306 | 149695604 | 140299 | 1 | 1 | 3 | 0.05404976 | 0.17593012 | 2 | 6 | 0.30102999 | 0.17593012 |
| chr4 | 149695604 | 149695663 | 60     | 1 | 2 | 4 | 0.1575501  | 0.18734596 | 2 | 4 | 0.1575501  | 0.18734596 |
| chr4 | 149695663 | 149892825 | 197163 | 1 | 0 | 4 | 0          | 0.18734596 | 2 | 4 | 0.61140001 | 0.18734596 |
| chr4 | 149892825 | 149892884 | 60     | 1 | 0 | 6 | 0          | 0.04875589 | 2 | 9 | 0.61140001 | 0.5732208  |
| chr4 | 149892884 | 149970772 | 77889  | 1 | 0 | 6 | 0          | 0.129913   | 2 | 7 | 0.61140001 | 0.30102999 |
| chr4 | 149970772 | 149970831 | 60     | 1 | 0 | 8 | 0          | 0.30102999 | 2 | 7 | 0.61140001 | 0.13499366 |
| chr4 | 149970831 | 150233681 | 262851 | 2 | 0 | 3 | 0          | 0.17593012 | 1 | 3 | 0.30102999 | 0.17593012 |
| chr4 | 150233681 | 150233740 | 60     | 1 | 1 | 4 | 0.05404976 | 0.30102999 | 2 | 3 | 0.30102999 | 0.10122019 |
| chr4 | 150233740 | 150325481 | 91742  | 1 | 0 | 4 | 0          | 0.30102999 | 2 | 3 | 0.61140001 | 0.10122019 |
| chr4 | 150325481 | 150325540 | 60     | 1 | 0 | 6 | 0          | 0.129913   | 2 | 7 | 0.61140001 | 0.30102999 |
| chr4 | 150325540 | 150605535 | 279996 | 3 | 0 | 5 | 0          | 0.19510895 | 2 | 5 | 0.61140001 | 0.19510895 |
| chr4 | 150605535 | 150605594 | 60     | 1 | 0 | 6 | 0          | 0.20064824 | 2 | 6 | 0.61140001 | 0.20064824 |
| chr4 | 150605594 | 150690325 | 84732  | 1 | 0 | 6 | 0          | 0.30102999 | 2 | 5 | 0.61140001 | 0.12309572 |
| chr4 | 150690325 | 150741996 | 51672  | 1 | 0 | 5 | 0          | 0.19510895 | 2 | 5 | 0.61140001 | 0.19510895 |
| chr4 | 150741996 | 150742055 | 60     | 1 | 0 | 6 | 0          | 0.30102999 | 2 | 5 | 0.61140001 | 0.12309572 |
| chr4 | 150742055 | 150807105 | 65051  | 1 | 0 | 5 | 0          | 0.19510895 | 2 | 5 | 0.61140001 | 0.19510895 |
| chr4 | 150807105 | 150807164 | 60     | 1 | 0 | 5 | 0.05404976 | 0.19510895 | 2 | 5 | 0.30102999 | 0.19510895 |
| chr4 | 150807164 | 150944669 | 137506 | 1 | 0 | 4 | 0          | 0.11390336 | 2 | 5 | 0.61140001 | 0.30102999 |
| chr4 | 150944669 | 151023663 | 78995  | 1 | 0 | 3 | 0          | 0.05670724 | 2 | 5 | 0.61140001 | 0.45545077 |
| chr4 | 151023663 | 151062397 | 38735  | 2 | 2 | 4 | 0.1575501  | 0.11390336 | 2 | 5 | 0.1575501  | 0.30102999 |
| chr4 | 151062397 | 151138773 | 76377  | 2 | 2 | 4 | 0.05404976 | 0.11390336 | 2 | 5 | 0.30102999 | 0.30102999 |
| chr4 | 151138773 | 151211578 | 72806  | 3 | 2 | 6 | 0.1575501  | 0.12309572 | 2 | 6 | 0.1575501  | 0.30102999 |
| chr4 | 151211578 | 151211637 | 60     | 1 | 2 | 5 | 0.1575501  | 0.07511598 | 2 | 7 | 0.1575501  | 0.43181735 |
| chr4 | 151211637 | 151242375 | 30739  | 2 | 2 | 5 | 0.1575501  | 0.12309572 | 2 | 6 | 0.1575501  | 0.30102999 |
| chr4 | 151242375 | 151312601 | 70227  | 1 | 1 | 5 | 0.05404976 | 0.12309572 | 2 | 6 | 0.30102999 | 0.30102999 |
| chr4 | 151312601 | 151312660 | 60     | 1 | 1 | 5 | 0.05404976 | 0.07511598 | 2 | 7 | 0.30102999 | 0.43181735 |
| chr4 | 151312660 | 151419552 | 106893 | 2 | 2 | 3 | 0.05404976 | 0.01598258 | 2 | 7 | 0.30102999 | 0.84395715 |
| chr4 | 151419552 | 151470134 | 50583  | 2 | 2 | 2 | 0.05404976 | 0.01053319 | 2 | 6 | 0.30102999 | 0.91219088 |
| chr4 | 151470134 | 151503983 | 33850  | 3 | 2 | 2 | 0.1575501  | 0.01053319 | 2 | 6 | 0.1575501  | 0.91219088 |
| chr4 | 151503983 | 151624865 | 120883 | 2 | 2 | 2 | 0.05404976 | 0.01053319 | 2 | 6 | 0.30102999 | 0.91219088 |
| chr4 | 151624865 | 151678774 | 53910  | 2 | 2 | 2 | 0.1575501  | 0.01053319 | 2 | 6 | 0.1575501  | 0.91219088 |
| chr4 | 151678774 | 151678833 | 60     | 1 | 2 | 3 | 0.1575501  | 0.01598258 | 2 | 7 | 0.1575501  | 0.84395715 |
| chr4 | 151678833 | 152092541 | 413709 | 9 | 2 | 3 | 0.1575501  | 0.03070643 | 2 | 6 | 0.1575501  | 0.63695542 |
| chr4 | 152092541 | 152092600 | 60     | 1 | 2 | 4 | 0.1575501  | 0.06713722 | 2 | 6 | 0.1575501  | 0.44141547 |
| chr4 | 152092600 | 152201339 | 108740 | 2 | 2 | 3 | 0.1575501  | 0.03070643 | 2 | 6 | 0.1575501  | 0.63695542 |
| chr4 | 152201339 | 152201398 | 60     | 1 | 2 | 4 | 0.1575501  | 0.06713722 | 2 | 6 | 0.1575501  | 0.44141547 |
| chr4 | 152201398 | 152261714 | 60317  | 1 | 2 | 4 | 0.1575501  | 0.11390336 | 2 | 5 | 0.1575501  | 0.30102999 |
| chr4 | 152261714 | 152409995 | 148282 | 2 | 2 | 3 | 0.1575501  | 0.05670724 | 2 | 5 | 0.1575501  | 0.45545077 |
| chr4 | 152409995 | 152466467 | 56473  | 2 | 2 | 3 | 0.1575501  | 0.01598258 | 2 | 7 | 0.1575501  | 0.84395715 |
| chr4 | 152466467 | 152548183 | 81717  | 1 | 2 | 3 | 0.30102999 | 0.03070643 | 1 | 6 | 0.05404976 | 0.63695542 |
| chr4 | 152548183 | 152592030 | 43848  | 1 | 2 | 2 | 0.30102999 | 0.0429175  | 1 | 4 | 0.05404976 | 0.47744371 |
| chr4 | 152592030 | 152640630 | 48601  | 1 | 2 | 2 | 0.61140001 | 0.0429175  | 0 | 4 | 0.47744371 | 0          |
| chr4 | 152640630 | 152720434 | 79805  | 1 | 1 | 2 | 0.30102999 | 0.0429175  | 0 | 4 | 0.47744371 | 0          |
| chr4 | 152720434 | 152720493 | 60     | 1 | 1 | 2 | 0.1218695  | 0.0429175  | 1 | 4 | 0.1218695  | 0.47744371 |
| chr4 | 152720493 | 152877808 | 157316 | 1 | 1 | 2 | 0.1218695  | 0.0828913  | 1 | 3 | 0.1218695  | 0.30102999 |
| chr4 | 152877808 | 153008656 | 130849 | 2 | 2 | 3 | 0.30102999 | 0.17593012 | 3 | 3 | 0.05404976 | 0.17593012 |
| chr4 | 153008656 | 153179401 | 170746 | 1 | 2 | 2 | 0.30102999 | 0.1575501  | 1 | 2 | 0.05404976 | 0.1575501  |
| chr4 | 153179401 | 153242458 | 63058  | 1 | 1 | 2 | 0.1218695  | 0.1575501  | 1 | 2 | 0.1218695  | 0.1575501  |
| chr4 | 153242458 | 153259046 | 16589  | 2 | 1 | 3 | 0.1218695  | 0.30102999 | 1 | 2 | 0.1218695  | 0.0828913  |
| chr4 | 153259046 | 153317903 | 58858  | 1 | 1 | 1 | 0.1218695  | 0.05404976 | 1 | 2 | 0.1218695  | 0.30102999 |
| chr4 | 153317903 | 153387189 | 69287  | 2 | 2 | 1 | 0.30102999 | 0.05404976 | 2 | 2 | 0.05404976 | 0.30102999 |
| chr4 | 153387189 | 153458987 | 71799  | 2 | 2 | 4 | 0.30102999 | 0.47744371 | 2 | 2 | 0.05404976 | 0.0429175  |
| chr4 | 153458987 | 153459046 | 60     | 1 | 2 | 4 | 0.30102999 | 0.30102999 | 3 | 3 | 0.05404976 | 0.10122019 |
| chr4 | 153459046 | 153575250 | 116205 | 1 | 2 | 4 | 0.30102999 | 0.47744371 | 2 | 2 | 0.05404976 | 0.0429175  |
| chr4 | 153575250 | 153575309 | 60     | 1 | 2 | 4 | 0.30102999 | 0.18734596 | 4 | 4 | 0.05404976 | 0.18734596 |
| chr4 | 153575309 | 153599033 | 23725  | 2 | 4 | 3 | 0.30102999 | 0.30102999 | 3 | 3 | 0.05404976 | 0.10122019 |
| chr4 | 153599033 | 153690877 | 91845  | 2 | 1 | 4 | 0.1218695  | 0.30102999 | 1 | 3 | 0.1218695  | 0.10122019 |
| chr4 | 153690877 | 153985249 | 294373 | 6 | 1 | 4 | 0.1218695  | 0.18734596 | 4 | 4 | 0.1218695  | 0.18734596 |
| chr4 | 153985249 | 154260061 | 274813 | 6 | 1 | 4 | 0.1218695  | 0.30102999 | 4 | 4 | 0.1218695  | 0.10122019 |
| chr4 | 154260061 | 154296780 | 36720  | 3 | 2 | 4 | 0.30102999 | 0.18734596 | 3 | 4 | 0.05404976 | 0.18734596 |
| chr4 | 154296780 | 154368688 | 72089  | 2 | 2 | 3 | 0.30102999 | 0.17593012 | 1 | 3 | 0.05404976 | 0.17593012 |
| chr4 | 154368688 | 154400503 | 31636  | 1 | 1 | 3 | 0.1218695  | 0.17593012 | 1 | 3 | 0.1218695  | 0.17593012 |
| chr4 | 154400503 | 154505770 | 105288 | 4 | 1 | 4 | 0.1218695  | 0.30102999 | 1 | 3 | 0.1218695  | 0.10122019 |
| chr4 | 154505770 | 154505829 | 60     | 1 | 4 | 3 | 0.30102999 | 0.18734596 | 4 | 1 | 0.05404976 | 0.18734596 |
| chr4 | 154505829 | 154621801 | 115973 | 3 | 3 | 4 | 0.1218695  | 0.18734596 | 1 | 4 | 0.1218695  | 0.18734596 |
| chr4 | 154621801 | 154626457 | 4657   | 2 | 2 | 4 | 0.30102999 | 0.18734596 | 1 | 4 | 0.05404976 | 0.18734596 |
| chr4 | 154626457 | 154635451 | 8995   | 1 | 2 | 3 | 0.30102999 | 0.10122019 | 1 | 4 | 0.05404976 | 0.30102999 |
| chr4 | 154635451 | 154664258 | 28808  | 1 | 1 | 3 | 0.1218695  | 0.10122019 | 1 | 4 | 0.1218695  | 0.30102999 |
| chr4 | 154664258 | 154767721 | 103464 | 2 | 1 | 2 | 0.1218695  | 0.0429175  | 1 | 4 | 0.1218695  | 0.47744371 |
| chr4 | 154767721 | 154767780 | 60     | 1 | 1 | 4 | 0.1218695  | 0.18734596 | 1 | 4 | 0.1218695  | 0.18734596 |
| chr4 | 154767780 | 155003587 | 235808 | 1 | 1 | 3 | 0.1218695  | 0.10122019 | 1 | 4 | 0.1218695  | 0.30102999 |
| chr4 | 155003587 | 155157246 | 153660 | 2 | 2 | 4 | 0.30102999 | 0.18734596 | 1 | 4 | 0.05404976 | 0.18734596 |
| chr4 | 155157246 | 155257114 | 99869  | 5 | 2 | 5 | 0.30102999 | 0.30102999 | 1 | 4 | 0.05404976 | 0.11390336 |
| chr4 | 155257114 | 155311705 | 54592  | 1 | 1 | 4 | 0.1218695  | 0.18734596 | 1 | 4 | 0.1218695  | 0.18734596 |
| chr4 | 155311705 | 155382205 | 70501  | 2 | 1 | 4 | 0.1218695  | 0.06713722 | 1 | 6 | 0.1218695  | 0.44141547 |
| chr4 | 155382205 | 155490843 | 108639 | 2 | 1 | 3 | 0.1218695  | 0.03070643 | 1 | 4 | 0.1218695  | 0.63695542 |
| chr4 | 155490843 | 155527838 | 36996  | 2 | 1 | 1 | 0.1218695  | 0.01091641 | 1 | 4 | 0.1218695  | 0.76005302 |
| chr4 | 155527838 | 155527892 | 55     | 1 | 1 | 3 | 0.1218695  | 0.03070643 | 1 | 6 | 0.1218695  | 0.63695542 |
| chr4 | 155527892 | 155662218 | 134327 | 2 | 1 | 2 | 0.1218695  | 0.02162467 | 1 | 5 | 0.1218695  | 0.68214471 |
| chr4 | 155662218 | 155671011 | 8794   | 1 | 1 | 1 | 0.1218695  | 0.01091641 | 1 | 4 | 0.1218695  | 0.76005302 |
| chr4 | 155671011 | 155801974 | 130964 | 3 | 1 | 1 | 0.1218695  | 0.02438896 | 3 | 1 | 0.1218695  | 0.51676182 |
| chr4 | 155801974 | 155904890 | 102917 | 2 | 2 | 2 | 0.30102999 | 0.0828913  | 1 | 3 | 0.05404976 | 0.30102999 |
| chr4 | 155904890 | 155904949 | 60     | 1 | 2 | 4 | 0.30102999 | 0.11390336 | 1 | 5 | 0.05404976 | 0.30102999 |
| chr4 | 155904949 | 156026296 | 121348 | 1 | 2 | 3 | 0.30102999 | 0.10122019 | 1 | 4 | 0.05404976 | 0.30102999 |
| chr4 | 156026296 | 156232623 | 206328 | 4 | 2 | 3 | 0.30102999 | 0.05670724 | 1 | 5 | 0.05404976 | 0.45545077 |
| chr4 | 156232623 | 156294417 | 61795  | 3 | 2 | 3 | 0.30102999 | 0.10122019 | 1 | 4 | 0.05404976 | 0.30102999 |
| chr4 | 156294417 | 156370372 |        |   |   |   |            |            |   |   |            |            |



|      |           |           |        |    |    |           |            |            |    |            |            |            |
|------|-----------|-----------|--------|----|----|-----------|------------|------------|----|------------|------------|------------|
| chr4 | 158983859 | 159091434 | 107576 | 3  | 1  | 12        | 0.1218695  | 0.41314172 | 1  | 10         | 0.1218695  | 0.09290028 |
| chr4 | 159091434 | 159132513 | 41080  | 1  | 1  | 11        | 0.1218695  | 0.30102999 | 1  | 10         | 0.1218695  | 0.14303407 |
| chr4 | 159132513 | 159132572 | 60     | 1  | 12 | 0.1218695 | 0.41314172 | 1          | 10 | 0.1218695  | 0.09290028 |            |
| chr4 | 159132572 | 159263283 | 130712 | 2  | 1  | 11        | 0.1218695  | 0.30102999 | 1  | 10         | 0.1218695  | 0.14303407 |
| chr4 | 159263283 | 159263342 | 60     | 1  | 13 | 0.1218695 | 0.5498098  | 1          | 10 | 0.1218695  | 0.0574087  |            |
| chr4 | 159263342 | 159382823 | 119482 | 2  | 1  | 12        | 0.1218695  | 0.41314172 | 1  | 10         | 0.1218695  | 0.09290028 |
| chr4 | 159382823 | 159502583 | 119761 | 2  | 1  | 9         | 0.1218695  | 0.14135546 | 1  | 10         | 0.1218695  | 0.30102999 |
| chr4 | 159502583 | 159554549 | 51967  | 1  | 0  | 9         | 0          | 0.14135546 | 1  | 10         | 0.30102999 | 0.30102999 |
| chr4 | 159554549 | 159593954 | 39406  | 2  | 0  | 10        | 0          | 0.21118145 | 1  | 10         | 0.30102999 | 0.21118145 |
| chr4 | 159593954 | 159642658 | 48705  | 3  | 0  | 11        | 0          | 0.30102999 | 1  | 10         | 0.30102999 | 0.14303407 |
| chr4 | 159642658 | 159807064 | 164407 | 4  | 0  | 9         | 0          | 0.14135546 | 1  | 10         | 0.30102999 | 0.30102999 |
| chr4 | 159807064 | 159894456 | 87393  | 3  | 0  | 10        | 0          | 0.21118145 | 1  | 10         | 0.30102999 | 0.21118145 |
| chr4 | 159894456 | 159956250 | 61795  | 2  | 0  | 9         | 0          | 0.14135546 | 1  | 10         | 0.30102999 | 0.30102999 |
| chr4 | 159956250 | 159985792 | 29543  | 1  | 0  | 7         | 0          | 0.05232577 | 1  | 10         | 0.30102999 | 0.56314362 |
| chr4 | 159985792 | 160101955 | 116164 | 1  | 0  | 6         | 0          | 0.02793176 | 0  | 10         | 0          | 0.74627054 |
| chr4 | 160101955 | 160102014 | 60     | 1  | 0  | 7         | 0          | 0.05232577 | 0  | 10         | 0          | 0.56314362 |
| chr4 | 160102014 | 160189268 | 87255  | 1  | 0  | 6         | 0          | 0.02793176 | 0  | 10         | 0          | 0.74627054 |
| chr4 | 160189268 | 160355412 | 166145 | 5  | 0  | 7         | 0          | 0.05232577 | 0  | 10         | 0          | 0.56314362 |
| chr4 | 160355412 | 160429414 | 74003  | 1  | 0  | 7         | 0          | 0.08584816 | 0  | 9          | 0          | 0.42015402 |
| chr4 | 160429414 | 160517264 | 87851  | 1  | 0  | 6         | 0          | 0.129913   | 0  | 7          | 0          | 0.30102999 |
| chr4 | 160517264 | 160517323 | 60     | 1  | 0  | 6         | 0          | 0.08123216 | 0  | 8          | 0          | 0.4250187  |
| chr4 | 160517323 | 160689333 | 172011 | 1  | 0  | 5         | 0          | 0.04407651 | 0  | 8          | 0          | 0.58747015 |
| chr4 | 160689333 | 160806765 | 117433 | 1  | 0  | 5         | 0          | 0.07511598 | 0  | 7          | 0          | 0.43181735 |
| chr4 | 160806765 | 160806824 | 60     | 1  | 0  | 6         | 0          | 0.02793176 | 0  | 10         | 0          | 0.74627054 |
| chr4 | 160806824 | 160897361 | 90538  | 1  | 0  | 4         | 0          | 0.00530919 | 0  | 10         | 0          | 1.2568129  |
| chr4 | 160897361 | 161147440 | 250080 | 1  | 0  | 1         | 0          | 8.47E-04   | 0  | 7          | 0          | 1.62048027 |
| chr4 | 161147440 | 161147499 | 60     | 1  | 0  | 1         | 0          | 3.39E-04   | 0  | 8          | 0          | 1.94674965 |
| chr4 | 161147499 | 161477490 | 329992 | 2  | 0  | 0         | 0          | 0          | 0  | 2          | 0          | 0.61140001 |
| chr4 | 161477490 | 161515746 | 38257  | 2  | 0  | 1         | 0          | 8.47E-04   | 0  | 7          | 0          | 1.62048027 |
| chr4 | 161515746 | 161768683 | 252938 | 1  | 0  | 0         | 0.00204627 | 0          | 6  | 0          | 0          | 1.31360226 |
| chr4 | 161768683 | 161768742 | 60     | 1  | 0  | 3         | 0          | 0.00378107 | 0  | 9          | 0          | 1.33111237 |
| chr4 | 161768742 | 161929917 | 161176 | 1  | 0  | 3         | 0          | 0.0079614  | 0  | 8          | 0          | 1.07548421 |
| chr4 | 161929917 | 161929976 | 60     | 1  | 0  | 4         | 0          | 0.01077081 | 0  | 9          | 0          | 1.01542894 |
| chr4 | 161929976 | 162186946 | 256971 | 1  | 0  | 3         | 0          | 0.00378107 | 0  | 9          | 0          | 1.33111237 |
| chr4 | 162186946 | 162307554 | 120609 | 2  | 0  | 3         | 0          | 7.28E-04   | 0  | 11         | 0          | 1.91540774 |
| chr4 | 162307554 | 162371010 | 63457  | 1  | 0  | 3         | 0          | 0.00170589 | 0  | 10         | 0          | 1.61091002 |
| chr4 | 162371010 | 162461146 | 90137  | 3  | 0  | 4         | 0          | 0.00530919 | 0  | 10         | 0          | 1.2568129  |
| chr4 | 162461146 | 162461205 | 60     | 1  | 0  | 5         | 0          | 0.00666883 | 1  | 11         | 0.30102999 | 1.20557689 |
| chr4 | 162461205 | 162888176 | 426972 | 9  | 0  | 5         | 0          | 0.01320236 | 0  | 10         | 0          | 0.97390707 |
| chr4 | 162888176 | 162954756 | 66581  | 1  | 0  | 5         | 0          | 0.02473314 | 0  | 9          | 0          | 0.76806864 |
| chr4 | 162954756 | 163084866 | 130111 | 3  | 0  | 5         | 0          | 0.01320236 | 0  | 10         | 0          | 0.97390707 |
| chr4 | 163084866 | 163084925 | 60     | 1  | 0  | 7         | 0          | 0.00859896 | 1  | 13         | 0.30102999 | 1.14735594 |
| chr4 | 163084925 | 163164521 | 79597  | 1  | 0  | 5         | 0          | 0.00666883 | 0  | 11         | 0          | 1.20557689 |
| chr4 | 163164521 | 163366922 | 202402 | 1  | 0  | 4         | 0          | 0.00530919 | 0  | 10         | 0          | 1.2568129  |
| chr4 | 163366922 | 163435850 | 68929  | 2  | 0  | 5         | 0          | 0.01320236 | 0  | 10         | 0          | 0.97390707 |
| chr4 | 163435850 | 163435909 | 60     | 1  | 0  | 8         | 0          | 0.08923391 | 0  | 10         | 0          | 0.4167287  |
| chr4 | 163435909 | 163669490 | 233582 | 1  | 0  | 6         | 0          | 0.02793176 | 0  | 10         | 0          | 0.74627054 |
| chr4 | 163669490 | 163669549 | 60     | 1  | 0  | 6         | 0          | 0.02793176 | 1  | 10         | 0.30102999 | 0.74627054 |
| chr4 | 163669549 | 164054351 | 384803 | 2  | 0  | 3         | 0          | 0.01598258 | 0  | 7          | 0          | 0.84395715 |
| chr4 | 164054351 | 164245296 | 109946 | 4  | 0  | 4         | 0          | 0.02074938 | 0  | 8          | 0          | 0.79906872 |
| chr4 | 164245296 | 164271409 | 26114  | 5  | 0  | 5         | 0          | 0.01320236 | 1  | 10         | 0.30102999 | 0.97390707 |
| chr4 | 164271409 | 164392415 | 121007 | 1  | 0  | 4         | 0          | 0.00530919 | 1  | 10         | 0.30102999 | 1.2568129  |
| chr4 | 164392415 | 164829766 | 437352 | 10 | 0  | 3         | 0          | 0.00170589 | 0  | 10         | 0          | 1.61091002 |
| chr4 | 164829766 | 164866110 | 36345  | 2  | 0  | 3         | 0          | 7.28E-04   | 0  | 11         | 0          | 1.91540774 |
| chr4 | 164866110 | 164941281 | 75172  | 1  | 0  | 3         | 0          | 0.00170589 | 0  | 10         | 0          | 1.61091002 |
| chr4 | 164941281 | 165032745 | 91465  | 2  | 1  | 4         | 0.1218695  | 0.00530919 | 1  | 10         | 0.1218695  | 1.2568129  |
| chr4 | 165032745 | 165119308 | 86564  | 2  | 1  | 6         | 0.1218695  | 0.02793176 | 1  | 10         | 0.1218695  | 0.74627054 |
| chr4 | 165119308 | 165119367 | 60     | 1  | 8  | 0.1218695 | 0.03209037 | 1          | 12 | 0.1218695  | 0.72109894 |            |
| chr4 | 165119367 | 165153490 | 34124  | 1  | 8  | 0.1218695 | 0.05490675 | 1          | 11 | 0.1218695  | 0.55623409 |            |
| chr4 | 165153490 | 165229132 | 75643  | 1  | 0  | 8         | 0.08923391 | 1          | 10 | 0.30102999 | 0.4167287  |            |
| chr4 | 165229132 | 165229191 | 60     | 1  | 0  | 9         | 0          | 0.14135546 | 1  | 10         | 0.30102999 | 0.30102999 |
| chr4 | 165229191 | 165306519 | 77329  | 1  | 0  | 9         | 0          | 0.14135546 | 0  | 10         | 0          | 0.30102999 |
| chr4 | 165306519 | 165306578 | 60     | 1  | 0  | 10        | 0          | 0.09290028 | 0  | 12         | 0          | 0.41314172 |
| chr4 | 165306578 | 165411087 | 104510 | 1  | 0  | 9         | 0          | 0.0565833  | 0  | 12         | 0          | 0.55190077 |
| chr4 | 165411087 | 165622245 | 211159 | 2  | 0  | 9         | 0          | 0.0565833  | 0  | 12         | 0.30102999 | 0.55190077 |
| chr4 | 165622245 | 165622304 | 60     | 1  | 0  | 10        | 0.1218695  | 0.0565833  | 1  | 12         | 0.1218695  | 0.55190077 |
| chr4 | 165622304 | 165717299 | 94996  | 1  | 0  | 9         | 0          | 0.09154957 | 0  | 11         | 0.30102999 | 0.41444892 |
| chr4 | 165717299 | 165879671 | 162373 | 2  | 0  | 9         | 0          | 0.14135546 | 0  | 10         | 0.30102999 | 0.30102999 |
| chr4 | 165879671 | 166000248 | 120578 | 4  | 1  | 9         | 0.1218695  | 0.09154957 | 1  | 11         | 0.1218695  | 0.41444892 |
| chr4 | 166000248 | 166067425 | 61778  | 2  | 1  | 9         | 0.1218695  | 0.20975986 | 1  | 9          | 0.1218695  | 0.20975986 |
| chr4 | 166067425 | 166090263 | 22839  | 2  | 1  | 9         | 0.1218695  | 0.09154957 | 1  | 11         | 0.1218695  | 0.41444892 |
| chr4 | 166090263 | 166132145 | 41883  | 1  | 1  | 9         | 0.1218695  | 0.14135546 | 1  | 10         | 0.1218695  | 0.30102999 |
| chr4 | 166132145 | 166263354 | 131210 | 2  | 1  | 6         | 0.1218695  | 0.08122616 | 1  | 8          | 0.1218695  | 0.4250187  |
| chr4 | 166263354 | 166310670 | 47317  | 2  | 1  | 7         | 0.1218695  | 0.08584816 | 1  | 9          | 0.1218695  | 0.42015402 |
| chr4 | 166310670 | 166389020 | 78351  | 4  | 1  | 7         | 0.1218695  | 0.05232577 | 1  | 10         | 0.1218695  | 0.56314362 |
| chr4 | 166389020 | 166450866 | 61847  | 2  | 1  | 7         | 0.1218695  | 0.08584816 | 1  | 9          | 0.1218695  | 0.42015402 |
| chr4 | 166450866 | 166583516 | 132651 | 1  | 1  | 6         | 0.1218695  | 0.04875589 | 1  | 9          | 0.1218695  | 0.5732208  |
| chr4 | 166583516 | 166730570 | 147055 | 1  | 0  | 5         | 0          | 0.02473314 | 1  | 9          | 0.30102999 | 0.76806864 |
| chr4 | 166730570 | 166730629 | 60     | 1  | 0  | 7         | 0          | 0.05232577 | 1  | 10         | 0.30102999 | 0.56314362 |
| chr4 | 166730629 | 166795159 | 64531  | 1  | 0  | 7         | 0          | 0.08584816 | 1  | 9          | 0.30102999 | 0.42015402 |
| chr4 | 166795159 | 166795216 | 58     | 1  | 1  | 8         | 0.1218695  | 0.08923391 | 1  | 10         | 0.1218695  | 0.4167287  |
| chr4 | 166795216 | 166848583 | 53368  | 1  | 0  | 7         | 0          | 0.05232577 | 1  | 10         | 0.30102999 | 0.56314362 |
| chr4 | 166848583 | 166848642 | 60     | 1  | 0  | 7         | 0          | 0.05232577 | 2  | 10         | 0.61140001 | 0.56314362 |
| chr4 | 166848642 | 166886588 | 37947  | 1  | 0  | 6         | 0          | 0.02793176 | 1  | 10         | 0.30102999 | 0.74627054 |
| chr4 | 166886588 | 166916289 | 29702  | 1  | 0  | 6         | 0          | 0.04875589 | 1  | 9          | 0.30102999 | 0.5732208  |
| chr4 | 166916289 | 166952081 | 35793  | 2  | 0  | 7         | 0          | 0.08584816 | 1  | 9          | 0.30102999 | 0.42015402 |
| chr4 | 166952081 | 167023386 | 71306  | 2  | 0  | 6         | 0          | 0.08122616 | 0  | 8          | 0.30102999 | 0.4250187  |
| chr4 | 167023386 | 167023445 | 60     | 1  | 1  | 6         | 0.1218695  | 0.04875589 | 1  | 9          | 0.1218695  | 0.5732208  |
| chr4 | 167023445 | 167061918 | 38474  | 1  | 0  | 6         | 0          | 0.04875589 | 1  | 9          | 0.30102999 | 0.5732208  |
| chr4 | 167061918 | 167105152 | 43235  | 1  | 0  | 5         | 0          | 0.04407651 | 1  | 8          | 0.30102999 | 0.58747015 |
| chr4 | 167105152 | 167282122 | 176971 | 1  | 0  | 4         | 0          | 0.02074938 | 1  | 8          | 0.30102999 | 0.79906872 |
| chr4 | 167282122 | 167282181 | 60     | 1  | 1  | 5         | 0.1218695  | 0.04407651 | 1  | 8          | 0.1218695  | 0.58747015 |
| chr4 | 167282181 | 167396654 | 114474 | 1  | 0  | 4         | 0          | 0.03812622 | 1  | 7          | 0.30102999 | 0.60763643 |
| chr4 | 167396654 | 167487741 | 91088  | 1  | 0  | 2         | 0          | 0.01053319 | 1  | 6          | 0.30102999 | 0.91219088 |
| chr4 | 167487741 | 167649124 | 161384 | 2  | 0  | 3         | 0          | 0.03070643 | 1  | 6          | 0.30102999 | 0.63695542 |
| chr4 | 167649124 | 167843635 | 194512 | 7  | 0  | 5         | 0          | 0.07511598 | 1  | 7          | 0.30102999 |            |

|      |           |           |        |   |    |           |            |            |    |           |            |            |
|------|-----------|-----------|--------|---|----|-----------|------------|------------|----|-----------|------------|------------|
| chr4 | 169910726 | 169926557 | 15832  | 1 | 1  | 10        | 0.1218695  | 0.30102999 | 1  | 9         | 0.1218695  | 0.14135546 |
| chr4 | 169926557 | 170016091 | 89535  | 2 | 1  | 10        | 0.1218695  | 0.21118145 | 1  | 10        | 0.1218695  | 0.21118145 |
| chr4 | 170016091 | 170016150 | 60     | 1 | 11 | 0.1218695 | 0.30102999 | 1          | 10 | 0.1218695 | 0.14303407 |            |
| chr4 | 170016150 | 170109541 | 93392  | 2 | 1  | 10        | 0.1218695  | 0.21118145 | 1  | 10        | 0.1218695  | 0.21118145 |
| chr4 | 170109541 | 170177217 | 67677  | 2 | 0  | 10        | 0          | 0.30102999 | 1  | 9         | 0.30102999 | 0.14135546 |
| chr4 | 170177217 | 170191669 | 14453  | 3 | 1  | 10        | 0.1218695  | 0.21118145 | 1  | 10        | 0.1218695  | 0.21118145 |
| chr4 | 170191669 | 170292905 | 101237 | 1 | 0  | 10        | 0          | 0.21118145 | 1  | 10        | 0.30102999 | 0.21118145 |
| chr4 | 170292905 | 170345752 | 52848  | 2 | 0  | 11        | 0          | 0.30102999 | 1  | 10        | 0.30102999 | 0.14303407 |
| chr4 | 170345752 | 170384111 | 38360  | 2 | 1  | 11        | 0.1218695  | 0.30102999 | 1  | 10        | 0.1218695  | 0.14303407 |
| chr4 | 170384111 | 170458692 | 74582  | 2 | 0  | 9         | 0          | 0.14135546 | 1  | 10        | 0.30102999 | 0.30102999 |
| chr4 | 170458692 | 170458751 | 60     | 1 | 0  | 10        | 0          | 0.21118145 | 1  | 10        | 0.30102999 | 0.21118145 |
| chr4 | 170458751 | 170506572 | 47822  | 1 | 0  | 9         | 0          | 0.14135546 | 1  | 10        | 0.30102999 | 0.30102999 |
| chr4 | 170506572 | 170557213 | 50642  | 2 | 0  | 11        | 0          | 0.30102999 | 1  | 10        | 0.30102999 | 0.14303407 |
| chr4 | 170557213 | 170613242 | 56030  | 1 | 0  | 10        | 0          | 0.30102999 | 1  | 9         | 0.30102999 | 0.14135546 |
| chr4 | 170613242 | 170613301 | 60     | 1 | 1  | 10        | 0.1218695  | 0.30102999 | 1  | 9         | 0.1218695  | 0.14135546 |
| chr4 | 170613301 | 170638268 | 24968  | 1 | 1  | 9         | 0.1218695  | 0.20975986 | 1  | 9         | 0.1218695  | 0.20975986 |
| chr4 | 170638268 | 170676342 | 38075  | 1 | 0  | 8         | 0          | 0.13872638 | 1  | 9         | 0.30102999 | 0.30102999 |
| chr4 | 170676342 | 170717982 | 41641  | 1 | 0  | 8         | 0          | 0.20764654 | 1  | 8         | 0.30102999 | 0.20764654 |
| chr4 | 170717982 | 170822356 | 104375 | 1 | 0  | 8         | 0          | 0.30102999 | 0  | 7         | 0          | 0.13499366 |
| chr4 | 170822356 | 170921438 | 99083  | 2 | 0  | 8         | 0          | 0.13872638 | 0  | 9         | 0          | 0.30102999 |
| chr4 | 170921438 | 170924853 | 3416   | 2 | 1  | 8         | 0.1218695  | 0.13872638 | 1  | 9         | 0.1218695  | 0.30102999 |
| chr4 | 170924853 | 171009594 | 84732  | 3 | 1  | 5         | 0.30102999 | 0.04875389 | 0  | 7         | 0          | 0.57322308 |
| chr4 | 171009594 | 171061324 | 51741  | 1 | 1  | 5         | 0.30102999 | 0.07511598 | 0  | 7         | 0          | 0.43181735 |
| chr4 | 171061324 | 171157969 | 96646  | 1 | 1  | 3         | 0.30102999 | 0.05670724 | 1  | 0         | 0          | 0.45545077 |
| chr4 | 171157969 | 171264950 | 106982 | 1 | 0  | 3         | 0          | 0.05670724 | 0  | 5         | 0          | 0.45545077 |
| chr4 | 171264950 | 171471410 | 206461 | 2 | 0  | 5         | 0          | 0.07511598 | 0  | 7         | 0          | 0.43181735 |
| chr4 | 171471410 | 171516361 | 44652  | 2 | 0  | 5         | 0          | 0.02473314 | 0  | 9         | 0          | 0.76806864 |
| chr4 | 171516361 | 171516420 | 60     | 1 | 0  | 6         | 0          | 0.02793176 | 0  | 10        | 0          | 0.74627054 |
| chr4 | 171516420 | 171587962 | 71543  | 1 | 0  | 4         | 0          | 0.11390336 | 0  | 5         | 0          | 0.30102999 |
| chr4 | 171587962 | 171794591 | 206630 | 1 | 0  | 3         | 0          | 0.10122019 | 0  | 4         | 0          | 0.30102999 |
| chr4 | 171794591 | 171881647 | 87057  | 2 | 0  | 3         | 0          | 0.03070643 | 0  | 6         | 0          | 0.63695542 |
| chr4 | 171881647 | 171881706 | 60     | 1 | 0  | 6         | 0          | 0.20064824 | 0  | 6         | 0          | 0.20064824 |
| chr4 | 171881706 | 172013457 | 131752 | 1 | 0  | 2         | 0          | 0.08289318 | 0  | 3         | 0          | 0.30102999 |
| chr4 | 172013457 | 172152864 | 139408 | 2 | 0  | 2         | 0          | 0.0429175  | 0  | 4         | 0          | 0.47744371 |
| chr4 | 172152864 | 172152923 | 60     | 1 | 0  | 3         | 0          | 0.03070643 | 1  | 6         | 0.30102999 | 0.63695542 |
| chr4 | 172152923 | 172369753 | 216831 | 1 | 0  | 3         | 0          | 0.05670724 | 1  | 5         | 0.30102999 | 0.45545077 |
| chr4 | 172369753 | 172496219 | 126467 | 2 | 0  | 5         | 0          | 0.12309572 | 1  | 6         | 0.30102999 | 0.30102999 |
| chr4 | 172496219 | 172496278 | 60     | 1 | 0  | 5         | 0          | 0.07511598 | 1  | 7         | 0.30102999 | 0.43181735 |
| chr4 | 172496278 | 172602774 | 106497 | 1 | 0  | 3         | 0          | 0.05670724 | 1  | 5         | 0.30102999 | 0.45545077 |
| chr4 | 172602774 | 172741297 | 138524 | 2 | 0  | 3         | 0          | 0.05670724 | 2  | 5         | 0.6114001  | 0.45545077 |
| chr4 | 172741297 | 172930618 | 189322 | 4 | 0  | 6         | 0          | 0.129913   | 2  | 7         | 0.6114001  | 0.30102999 |
| chr4 | 172930618 | 172930677 | 60     | 1 | 0  | 7         | 0          | 0.20469099 | 2  | 7         | 0.6114001  | 0.20469099 |
| chr4 | 172930677 | 172958857 | 28181  | 1 | 0  | 6         | 0          | 0.129913   | 2  | 7         | 0.6114001  | 0.30102999 |
| chr4 | 172958857 | 173123156 | 164300 | 4 | 0  | 7         | 0          | 0.05232577 | 2  | 10        | 0.6114001  | 0.56314362 |
| chr4 | 173123156 | 173191490 | 68335  | 3 | 0  | 8         | 0          | 0.08923391 | 2  | 10        | 0.6114001  | 0.4167287  |
| chr4 | 173191490 | 173191549 | 60     | 1 | 0  | 9         | 0          | 0.09154957 | 2  | 11        | 0.6114001  | 0.41444892 |
| chr4 | 173191549 | 173225040 | 33492  | 1 | 0  | 9         | 0          | 0.09154957 | 1  | 11        | 0.30102999 | 0.41444892 |
| chr4 | 173225040 | 173265171 | 40132  | 2 | 0  | 10        | 0          | 0.14303407 | 1  | 11        | 0.30102999 | 0.30102999 |
| chr4 | 173265171 | 173265230 | 60     | 1 | 0  | 10        | 0          | 0.09290028 | 1  | 12        | 0.30102999 | 0.41314172 |
| chr4 | 173265230 | 173320227 | 54998  | 1 | 0  | 9         | 0          | 0.20975986 | 1  | 9         | 0.30102999 | 0.20975986 |
| chr4 | 173320227 | 173320286 | 60     | 1 | 0  | 10        | 0          | 0.30102999 | 1  | 9         | 0.6114001  | 0.14135546 |
| chr4 | 173320286 | 173389757 | 69472  | 2 | 0  | 10        | 0          | 0.4167287  | 2  | 8         | 0.6114001  | 0.08923391 |
| chr4 | 173389757 | 173389816 | 60     | 1 | 0  | 10        | 0          | 0.30102999 | 2  | 9         | 0.6114001  | 0.14135546 |
| chr4 | 173389816 | 173429556 | 39741  | 1 | 0  | 10        | 0          | 0.4167287  | 2  | 8         | 0.6114001  | 0.08923391 |
| chr4 | 173429556 | 173499640 | 70085  | 1 | 0  | 9         | 0          | 0.30102999 | 2  | 8         | 0.6114001  | 0.13872638 |
| chr4 | 173499640 | 173515167 | 15528  | 2 | 0  | 9         | 0          | 0.30102999 | 2  | 9         | 0.6114001  | 0.14135546 |
| chr4 | 173515167 | 173557224 | 42058  | 1 | 0  | 9         | 0          | 0.30102999 | 2  | 8         | 0.6114001  | 0.13872638 |
| chr4 | 173557224 | 173630484 | 73261  | 2 | 0  | 9         | 0          | 0.20975986 | 2  | 9         | 0.6114001  | 0.20975986 |
| chr4 | 173630484 | 173775754 | 145271 | 4 | 0  | 10        | 0          | 0.21118145 | 2  | 10        | 0.6114001  | 0.21118145 |
| chr4 | 173775754 | 173855435 | 79682  | 2 | 0  | 9         | 0          | 0.14135546 | 2  | 10        | 0.6114001  | 0.30102999 |
| chr4 | 173855435 | 173895390 | 39956  | 1 | 0  | 9         | 0          | 0.20975986 | 2  | 9         | 0.6114001  | 0.20975986 |
| chr4 | 173895390 | 173995028 | 99639  | 3 | 0  | 10        | 0          | 0.14135546 | 2  | 10        | 0.6114001  | 0.30102999 |
| chr4 | 173995028 | 173995087 | 60     | 1 | 0  | 10        | 0          | 0.21118145 | 2  | 10        | 0.6114001  | 0.21118145 |
| chr4 | 173995087 | 174079435 | 84349  | 1 | 0  | 10        | 0          | 0.30102999 | 2  | 9         | 0.6114001  | 0.14135546 |
| chr4 | 174079435 | 174194459 | 119025 | 3 | 0  | 10        | 0          | 0.20975986 | 2  | 9         | 0.6114001  | 0.20975986 |
| chr4 | 174194459 | 174223341 | 24083  | 2 | 0  | 9         | 0          | 0.30102999 | 2  | 9         | 0.6114001  | 0.14135546 |
| chr4 | 174223341 | 174253742 | 30062  | 1 | 0  | 9         | 0          | 0.20975986 | 2  | 9         | 0.6114001  | 0.20975986 |
| chr4 | 174253742 | 174292768 | 39027  | 2 | 0  | 9         | 0          | 0.20975986 | 2  | 9         | 0.93173516 | 0.20975986 |
| chr4 | 174292768 | 174314470 | 21703  | 4 | 0  | 10        | 0          | 0.30102999 | 4  | 3         | 0          | 0.14135546 |
| chr4 | 174314470 | 174364254 | 49785  | 1 | 0  | 10        | 0          | 0.4167287  | 3  | 8         | 0.93173516 | 0.08923391 |
| chr4 | 174364254 | 174410419 | 41666  | 1 | 0  | 9         | 0          | 0.42015402 | 2  | 7         | 0.6114001  | 0.08584816 |
| chr4 | 174410419 | 174449344 | 38926  | 1 | 0  | 9         | 0          | 0.42015402 | 1  | 7         | 0.30102999 | 0.08584816 |
| chr4 | 174449344 | 174530338 | 80995  | 3 | 0  | 9         | 0          | 0.30102999 | 1  | 8         | 0.30102999 | 0.13872638 |
| chr4 | 174530338 | 174530397 | 60     | 1 | 0  | 9         | 0          | 0.20975986 | 1  | 9         | 0.30102999 | 0.20975986 |
| chr4 | 174530397 | 174596651 | 66255  | 1 | 0  | 9         | 0          | 0.30102999 | 1  | 8         | 0.30102999 | 0.13872638 |
| chr4 | 174596651 | 174596710 | 60     | 1 | 0  | 9         | 0          | 0.30102999 | 2  | 8         | 0.6114001  | 0.13872638 |
| chr4 | 174596710 | 174817531 | 220822 | 1 | 0  | 8         | 0          | 0.20764654 | 2  | 8         | 0.6114001  | 0.20764654 |
| chr4 | 174817531 | 174941335 | 123805 | 2 | 0  | 8         | 0          | 0.13872638 | 2  | 9         | 0.6114001  | 0.30102999 |
| chr4 | 174941335 | 175090510 | 149176 | 1 | 0  | 8         | 0          | 0.4250187  | 2  | 6         | 0.6114001  | 0.08122616 |
| chr4 | 175090510 | 175196826 | 106317 | 2 | 0  | 7         | 0          | 0.43181735 | 1  | 5         | 0.30102999 | 0.07511598 |
| chr4 | 175196826 | 175196885 | 60     | 1 | 0  | 7         | 0          | 0.30102999 | 1  | 6         | 0.30102999 | 0.129913   |
| chr4 | 175196885 | 175224884 | 28000  | 1 | 0  | 6         | 0          | 0.20064824 | 1  | 6         | 0.30102999 | 0.20064824 |
| chr4 | 175224884 | 175239927 | 15044  | 2 | 0  | 6         | 0          | 0.20064824 | 2  | 6         | 0.6114001  | 0.20064824 |
| chr4 | 175239927 | 175260095 | 20169  | 1 | 0  | 6         | 0          | 0.20064824 | 2  | 6         | 0.30102999 | 0.20064824 |
| chr4 | 175260095 | 175260154 | 60     | 1 | 0  | 6         | 0          | 0.20064824 | 2  | 6         | 0.6114001  | 0.20064824 |
| chr4 | 175260154 | 175344518 | 84365  | 1 | 0  | 5         | 0          | 0.12309572 | 1  | 6         | 0.30102999 | 0.30102999 |
| chr4 | 175344518 | 175413193 | 68676  | 2 | 0  | 5         | 0          | 0.07511598 | 1  | 7         | 0.30102999 | 0.43181735 |
| chr4 | 175413193 | 175413252 | 60     | 1 | 0  | 5         | 0          | 0.04407651 | 1  | 5         | 0.30102999 | 0.58747015 |
| chr4 | 175413252 | 175564227 | 150976 | 2 | 0  | 5         | 0          | 0.19510895 | 1  | 5         | 0.30102999 | 0.19510895 |
| chr4 | 175564227 | 175595488 | 31262  | 2 | 0  | 5         | 0          | 0.04407651 | 2  | 8         | 0.30102999 | 0.58747015 |
| chr4 | 175595488 | 175595547 | 60     | 1 | 0  | 6         | 0          | 0.08122616 | 2  | 8         | 0.6114001  | 0.4250187  |
| chr4 | 175595547 | 175710121 | 114575 | 2 | 0  | 6         | 0          | 0.08122616 | 1  | 8         | 0.30102999 | 0.4250187  |
| chr4 | 175710121 | 175852205 | 142085 | 3 | 0  | 6         | 0          | 0.08122616 | 0  | 8         | 0          | 0.4250187  |
| chr4 | 175852205 | 176113231 | 261027 | 3 | 0  | 9         | 0          | 0.30102999 | 1  | 8         | 0.30102999 | 0.13872638 |
| chr4 | 176113231 | 176113290 | 60     | 1 | 0  | 9         | 0          | 0.20975986 | 2  | 9         | 0.6114001  | 0.20975986 |
| chr4 |           |           |        |   |    |           |            |            |    |           |            |            |

|      |           |           |        |    |   |    |   |            |   |    |            |            |
|------|-----------|-----------|--------|----|---|----|---|------------|---|----|------------|------------|
| chr4 | 179459635 | 179459694 | 60     | 1  | 0 | 5  | 0 | 0.12309572 | 0 | 6  | 0          | 0.30102999 |
| chr4 | 179459694 | 179738779 | 279086 | 2  | 0 | 2  | 0 | 0.1575501  | 0 | 2  | 0          | 0.1575501  |
| chr4 | 179738779 | 179738838 | 60     | 1  | 0 | 3  | 0 | 0.30102999 | 0 | 2  | 0          | 0.08289318 |
| chr4 | 180166540 | 180417434 | 250895 | 3  | 0 | 1  | 0 | 0.1218695  | 0 | 1  | 0          | 0.1218695  |
| chr4 | 180417434 | 180613104 | 195671 | 1  | 0 | 0  | 0 | 0.30102999 | 0 | 0  | 0          | 0          |
| chr4 | 180613104 | 180955202 | 342099 | 3  | 0 | 3  | 0 | 0.10122019 | 0 | 4  | 0          | 0.30102999 |
| chr4 | 180955202 | 181418338 | 463137 | 4  | 0 | 2  | 0 | 0.0429175  | 0 | 4  | 0          | 0.47744371 |
| chr4 | 181418338 | 181418397 | 60     | 1  | 0 | 2  | 0 | 0.02162467 | 0 | 5  | 0          | 0.68214471 |
| chr4 | 181418397 | 181772578 | 354182 | 4  | 0 | 4  | 0 | 0.0429175  | 0 | 4  | 0          | 0.47744371 |
| chr4 | 181772578 | 182302280 | 529703 | 5  | 0 | 2  | 0 | 0.02162467 | 1 | 5  | 0.30102999 | 0.68214471 |
| chr4 | 182302280 | 182453736 | 151457 | 2  | 0 | 2  | 0 | 0.00221948 | 1 | 8  | 0.30102999 | 1.44210395 |
| chr4 | 182453736 | 182453795 | 60     | 1  | 0 | 3  | 0 | 0.0079614  | 1 | 8  | 0.30102999 | 1.07548421 |
| chr4 | 182453795 | 182620988 | 167194 | 1  | 0 | 3  | 0 | 0.03070643 | 1 | 6  | 0.30102999 | 0.63695542 |
| chr4 | 182620988 | 182817057 | 196110 | 2  | 0 | 4  | 0 | 0.06713722 | 1 | 6  | 0.30102999 | 0.44141547 |
| chr4 | 182817057 | 182920816 | 103720 | 2  | 0 | 5  | 0 | 0.04407651 | 1 | 8  | 0.30102999 | 0.58747015 |
| chr4 | 182920816 | 182990240 | 69425  | 2  | 0 | 6  | 0 | 0.08122616 | 1 | 8  | 0.30102999 | 0.4250187  |
| chr4 | 182990240 | 183063613 | 73374  | 2  | 0 | 6  | 0 | 0.04875589 | 1 | 9  | 0.30102999 | 0.5732208  |
| chr4 | 183063613 | 183106730 | 43118  | 2  | 0 | 6  | 0 | 0.08122616 | 1 | 8  | 0.30102999 | 0.4250187  |
| chr4 | 183106730 | 183171959 | 65230  | 1  | 0 | 6  | 0 | 0.129913   | 1 | 7  | 0.30102999 | 0.30102999 |
| chr4 | 183171959 | 183247611 | 75653  | 2  | 0 | 7  | 0 | 0.20469099 | 1 | 7  | 0.30102999 | 0.20469099 |
| chr4 | 183247611 | 18337339  | 89729  | 3  | 0 | 7  | 0 | 0.08584816 | 1 | 8  | 0.30102999 | 0.42015402 |
| chr4 | 18337339  | 183462363 | 125025 | 2  | 0 | 7  | 0 | 0.13499366 | 1 | 8  | 0.30102999 | 0.30102999 |
| chr4 | 183462363 | 183523607 | 61245  | 3  | 0 | 8  | 0 | 0.05490675 | 1 | 11 | 0.30102999 | 0.55623409 |
| chr4 | 183523607 | 183608864 | 85258  | 2  | 0 | 7  | 0 | 0.03037338 | 1 | 11 | 0.30102999 | 0.73110763 |
| chr4 | 183608864 | 183658223 | 49360  | 2  | 0 | 8  | 0 | 0.05490675 | 1 | 11 | 0.30102999 | 0.55623409 |
| chr4 | 183658223 | 183714630 | 56408  | 2  | 0 | 9  | 0 | 0.0565833  | 1 | 12 | 0.30102999 | 0.55190077 |
| chr4 | 183714630 | 183751234 | 36605  | 1  | 0 | 8  | 0 | 0.08923391 | 1 | 10 | 0.30102999 | 0.4167287  |
| chr4 | 183751234 | 183836772 | 85539  | 5  | 0 | 8  | 0 | 0.13872638 | 1 | 9  | 0.30102999 | 0.30102999 |
| chr4 | 183836772 | 183935653 | 98882  | 1  | 0 | 8  | 0 | 0.2074654  | 1 | 8  | 0.30102999 | 0.2074654  |
| chr4 | 183935653 | 184018370 | 82718  | 2  | 0 | 8  | 0 | 0.13872638 | 1 | 9  | 0.30102999 | 0.30102999 |
| chr4 | 184018370 | 184018428 | 59     | 1  | 0 | 10 | 0 | 0.14303407 | 1 | 11 | 0.30102999 | 0.30102999 |
| chr4 | 184018428 | 184087638 | 69211  | 1  | 0 | 10 | 0 | 0.21118145 | 1 | 10 | 0.30102999 | 0.21118145 |
| chr4 | 184087638 | 184087697 | 60     | 1  | 0 | 10 | 0 | 0.14303407 | 1 | 11 | 0.30102999 | 0.30102999 |
| chr4 | 184087697 | 184186817 | 99121  | 2  | 0 | 8  | 0 | 0.2074654  | 1 | 8  | 0.30102999 | 0.2074654  |
| chr4 | 184186817 | 184239016 | 52200  | 3  | 0 | 8  | 0 | 0.03209037 | 1 | 12 | 0.30102999 | 0.72198984 |
| chr4 | 184239016 | 184291513 | 52498  | 1  | 0 | 8  | 0 | 0.08923391 | 1 | 10 | 0.30102999 | 0.4167287  |
| chr4 | 184291513 | 184368385 | 76873  | 2  | 0 | 9  | 0 | 0.14135546 | 1 | 10 | 0.30102999 | 0.30102999 |
| chr4 | 184368385 | 184368444 | 60     | 1  | 0 | 9  | 0 | 0.09154957 | 1 | 11 | 0.30102999 | 0.41444892 |
| chr4 | 184368444 | 18432129  | 63686  | 2  | 0 | 8  | 0 | 0.08923391 | 1 | 10 | 0.30102999 | 0.4167287  |
| chr4 | 18432129  | 184567533 | 135405 | 2  | 0 | 7  | 0 | 0.13499366 | 1 | 8  | 0.30102999 | 0.30102999 |
| chr4 | 184567533 | 184567592 | 60     | 1  | 0 | 9  | 0 | 0.09154957 | 1 | 11 | 0.30102999 | 0.41444892 |
| chr4 | 184567592 | 184606012 | 38421  | 2  | 0 | 8  | 0 | 0.05490675 | 1 | 11 | 0.30102999 | 0.55623409 |
| chr4 | 184606012 | 184618668 | 12657  | 1  | 0 | 8  | 0 | 0.08923391 | 1 | 10 | 0.30102999 | 0.4167287  |
| chr4 | 184618668 | 184628037 | 9370   | 2  | 0 | 9  | 0 | 0.14135546 | 1 | 10 | 0.30102999 | 0.30102999 |
| chr4 | 184628037 | 184717878 | 89842  | 1  | 0 | 9  | 0 | 0.20975986 | 1 | 9  | 0.30102999 | 0.20975986 |
| chr4 | 184717878 | 184717937 | 60     | 1  | 0 | 9  | 0 | 0.14135546 | 1 | 10 | 0.30102999 | 0.30102999 |
| chr4 | 184717937 | 184799413 | 81477  | 1  | 0 | 9  | 0 | 0.20975986 | 1 | 9  | 0.30102999 | 0.20975986 |
| chr4 | 184799413 | 184900899 | 101487 | 3  | 0 | 9  | 0 | 0.14135546 | 1 | 10 | 0.30102999 | 0.30102999 |
| chr4 | 184900899 | 185009999 | 109101 | 2  | 0 | 8  | 0 | 0.08923391 | 1 | 10 | 0.30102999 | 0.4167287  |
| chr4 | 185009999 | 185010058 | 60     | 1  | 0 | 10 | 0 | 0.21118145 | 1 | 10 | 0.30102999 | 0.21118145 |
| chr4 | 185010058 | 185093813 | 83756  | 2  | 0 | 8  | 0 | 0.08923391 | 1 | 10 | 0.30102999 | 0.4167287  |
| chr4 | 185093813 | 185248234 | 154422 | 4  | 0 | 10 | 0 | 0.21118145 | 1 | 10 | 0.30102999 | 0.21118145 |
| chr4 | 185248234 | 185309073 | 60840  | 3  | 0 | 11 | 0 | 0.21200206 | 1 | 11 | 0.30102999 | 0.21200206 |
| chr4 | 185309073 | 185366838 | 57766  | 2  | 0 | 10 | 0 | 0.14303407 | 1 | 11 | 0.30102999 | 0.30102999 |
| chr4 | 185366838 | 185395650 | 28813  | 2  | 0 | 12 | 0 | 0.30102999 | 1 | 11 | 0.30102999 | 0.14385241 |
| chr4 | 185395650 | 185444552 | 148903 | 2  | 0 | 10 | 0 | 0.14303407 | 1 | 11 | 0.30102999 | 0.30102999 |
| chr4 | 185444552 | 185533590 | 9039   | 3  | 0 | 11 | 0 | 0.21200206 | 1 | 11 | 0.30102999 | 0.21200206 |
| chr4 | 185533590 | 185722451 | 168862 | 8  | 0 | 11 | 0 | 0.30102999 | 1 | 10 | 0.30102999 | 0.14303407 |
| chr4 | 185722451 | 185787268 | 64818  | 2  | 0 | 12 | 0 | 0.21227046 | 1 | 12 | 0.30102999 | 0.21227046 |
| chr4 | 185787268 | 185921677 | 134410 | 1  | 0 | 11 | 0 | 0.21200206 | 1 | 11 | 0.30102999 | 0.21200206 |
| chr4 | 185921677 | 185955325 | 33649  | 2  | 0 | 11 | 0 | 0.14385241 | 1 | 12 | 0.30102999 | 0.30102999 |
| chr4 | 185955325 | 186001583 | 46259  | 1  | 0 | 10 | 0 | 0.09290028 | 1 | 12 | 0.30102999 | 0.41314172 |
| chr4 | 186001583 | 186001642 | 60     | 1  | 0 | 11 | 0 | 0.14385241 | 1 | 12 | 0.30102999 | 0.30102999 |
| chr4 | 186001642 | 186103582 | 101941 | 3  | 0 | 10 | 0 | 0.09290028 | 1 | 12 | 0.30102999 | 0.41314172 |
| chr4 | 186103582 | 186132514 | 28933  | 2  | 0 | 11 | 0 | 0.14385241 | 1 | 12 | 0.30102999 | 0.30102999 |
| chr4 | 186132514 | 186366551 | 234038 | 11 | 0 | 11 | 0 | 0.14385241 | 1 | 12 | 0.30102999 | 0.30102999 |
| chr4 | 186366551 | 186435311 | 68761  | 2  | 0 | 11 | 0 | 0.09334429 | 1 | 13 | 0.30102999 | 0.01712556 |
| chr4 | 186435311 | 186435988 | 638    | 2  | 0 | 12 | 0 | 0.14385241 | 1 | 12 | 0.30102999 | 0.30102999 |
| chr4 | 186435988 | 186444614 | 8667   | 1  | 0 | 12 | 0 | 0.0565833  | 1 | 15 | 0.30102999 | 0.55190077 |
| chr4 | 186444614 | 186444614 | 8667   | 1  | 0 | 12 | 0 | 0.09290028 | 1 | 14 | 0.30102999 | 0.41314172 |
| chr4 | 186444614 | 186454600 | 9987   | 1  | 0 | 11 | 0 | 0.0574087  | 1 | 14 | 0.30102999 | 0.5498098  |
| chr4 | 186454600 | 186454659 | 60     | 1  | 0 | 12 | 0 | 0.0565833  | 1 | 15 | 0.30102999 | 0.55190077 |
| chr4 | 186454659 | 186518650 | 63992  | 1  | 0 | 12 | 0 | 0.09290028 | 1 | 14 | 0.30102999 | 0.41314172 |
| chr4 | 186518650 | 186559340 | 40691  | 1  | 0 | 11 | 0 | 0.0574087  | 1 | 14 | 0.30102999 | 0.5498098  |
| chr4 | 186559340 | 186615258 | 55919  | 1  | 0 | 11 | 0 | 0.21200206 | 1 | 11 | 0.30102999 | 0.21200206 |
| chr4 | 186615258 | 186615317 | 60     | 1  | 0 | 12 | 0 | 0.30102999 | 1 | 11 | 0.30102999 | 0.14385241 |
| chr4 | 186615317 | 186663704 | 48388  | 1  | 0 | 11 | 0 | 0.30102999 | 1 | 10 | 0.30102999 | 0.14303407 |
| chr4 | 186663704 | 186696480 | 32777  | 2  | 0 | 11 | 0 | 0.21200206 | 1 | 11 | 0.30102999 | 0.21200206 |
| chr4 | 186696480 | 186817320 | 120841 | 2  | 0 | 11 | 0 | 0.30102999 | 1 | 10 | 0.30102999 | 0.14303407 |
| chr4 | 186817320 | 186817379 | 60     | 1  | 0 | 12 | 0 | 0.41314172 | 1 | 10 | 0.30102999 | 0.09290028 |
| chr4 | 186817379 | 186997805 | 180427 | 3  | 0 | 11 | 0 | 0.41444892 | 1 | 9  | 0.30102999 | 0.09154957 |
| chr4 | 186997805 | 187153401 | 155597 | 3  | 0 | 10 | 0 | 0.30102999 | 1 | 9  | 0.30102999 | 0.14135546 |
| chr4 | 187153401 | 187153460 | 60     | 1  | 0 | 12 | 0 | 0.41314172 | 1 | 10 | 0.30102999 | 0.09290028 |
| chr4 | 187153460 | 187201142 | 47683  | 2  | 0 | 10 | 0 | 0.30102999 | 1 | 9  | 0.30102999 | 0.14135546 |
| chr4 | 187201142 | 187209940 | 8799   | 2  | 0 | 11 | 0 | 0.30102999 | 1 | 10 | 0.30102999 | 0.14303407 |
| chr4 | 187209940 | 187268079 | 58140  | 1  | 0 | 10 | 0 | 0.30102999 | 1 | 9  | 0.30102999 | 0.14135546 |
| chr4 | 187268079 | 187370897 | 102819 | 1  | 0 | 9  | 0 | 0.20975986 | 1 | 9  | 0.30102999 | 0.20975986 |
| chr4 | 187370897 | 187370956 | 60     | 1  | 0 | 10 | 0 | 0.14303407 | 1 | 11 | 0.30102999 | 0.30102999 |
| chr4 | 187370956 | 187499602 | 128647 | 2  | 0 | 9  | 0 | 0.20975986 | 1 | 9  | 0.30102999 | 0.20975986 |
| chr4 | 187499602 | 187542770 | 43169  | 1  | 0 | 8  | 0 | 0.13872638 | 1 | 9  | 0.30102999 | 0.30102999 |
| chr4 | 187542770 | 187613922 | 71153  | 2  | 0 | 7  | 0 | 0.08584816 | 1 | 9  | 0.30102999 | 0.42015402 |
| chr4 | 187613922 | 187613981 | 60     | 1  | 0 | 9  | 0 | 0.14135546 | 1 | 10 | 0.30102999 | 0.30102999 |
| chr4 | 187613981 | 187698927 | 84947  | 2  | 0 | 7  | 0 | 0.08584816 | 1 | 9  | 0.30102999 | 0.42015402 |
| chr4 | 187698927 | 187755458 | 56532  | 1  | 0 | 7  | 0 | 0.13499366 | 1 | 8  | 0.30102999 | 0.30102999 |
| chr4 | 187755458 | 187755517 | 60     | 1  | 0 | 7  | 0 | 0.08584816 | 1 | 9  |            |            |

|      |           |           |        |   |   |   |            |            |   |    |            |            |
|------|-----------|-----------|--------|---|---|---|------------|------------|---|----|------------|------------|
| chr4 | 190049274 | 190175815 | 126542 | 2 | 0 | 7 | 0          | 0.03037338 | 0 | 11 | 0          | 0.73110763 |
| chr4 | 190175815 | 190350992 | 175178 | 2 | 0 | 6 | 0          | 0.08122616 | 0 | 8  | 0          | 0.4250187  |
| chr4 | 190350992 | 190422533 | 71542  | 2 | 0 | 0 | 0          | 0.05232577 | 0 | 10 | 0          | 0.56314362 |
| chr4 | 190422533 | 190619807 | 197275 | 3 | 0 | 4 | 0          | 0.03812622 | 0 | 7  | 0          | 0.60763643 |
| chr4 | 190619807 | 190650266 | 30460  | 2 | 0 | 0 | 0          | 0.04407651 | 0 | 8  | 0          | 0.58747015 |
| chr4 | 190650266 | 190767055 | 116790 | 2 | 0 | 2 | 0          | 0.01053319 | 0 | 6  | 0          | 0.91219088 |
| chr4 | 190767055 | 190896674 | 129620 | 1 | 0 | 3 | 0          | 0.00798414 | 0 | 8  | 0          | 1.07548421 |
| chr5 | 151737    | 207981    | 56245  | 2 | 2 | 1 | 0.1575501  | 0.1218695  | 2 | 2  | 0.1575501  | 0.1218695  |
| chr5 | 207981    | 364170    | 156190 | 4 | 2 | 1 | 0.1575501  | 0.05404976 | 2 | 2  | 0.1575501  | 0.30102999 |
| chr5 | 364170    | 527552    | 163383 | 4 | 3 | 1 | 0.30102999 | 0.02438896 | 2 | 3  | 0.08289318 | 0.51676182 |
| chr5 | 527552    | 820365    | 292814 | 5 | 3 | 1 | 0.17593012 | 0.02438896 | 3 | 3  | 0.17593012 | 0.51676182 |
| chr5 | 820365    | 871692    | 51328  | 2 | 4 | 1 | 0.30102999 | 0.01091641 | 3 | 4  | 0.10122019 | 0.76005302 |
| chr5 | 871692    | 1021681   | 149990 | 2 | 3 | 1 | 0.17593012 | 0.01091641 | 3 | 4  | 0.17593012 | 0.76005302 |
| chr5 | 1021681   | 1174543   | 152863 | 4 | 4 | 1 | 0.30102999 | 0.01091641 | 3 | 4  | 0.10122019 | 0.76005302 |
| chr5 | 1174543   | 1266671   | 92129  | 3 | 5 | 1 | 0.45545077 | 0.01091641 | 3 | 4  | 0.05670724 | 0.76005302 |
| chr5 | 1266671   | 1340550   | 73880  | 1 | 4 | 1 | 0.30102999 | 0.01091641 | 3 | 4  | 0.10122019 | 0.76005302 |
| chr5 | 1340550   | 1404604   | 64055  | 2 | 4 | 1 | 0.45545077 | 0.01091641 | 3 | 4  | 0.05670724 | 0.76005302 |
| chr5 | 1404604   | 1498180   | 93577  | 2 | 4 | 1 | 0.30102999 | 0.02438896 | 3 | 3  | 0.10122019 | 0.51676182 |
| chr5 | 1498180   | 1673040   | 174861 | 4 | 5 | 1 | 0.45545077 | 0.01091641 | 3 | 4  | 0.05670724 | 0.76005302 |
| chr5 | 1673040   | 1799145   | 126106 | 3 | 5 | 2 | 0.45545077 | 0.0429175  | 3 | 4  | 0.05670724 | 0.47744371 |
| chr5 | 1799145   | 1933186   | 134042 | 2 | 5 | 2 | 0.45545077 | 0.08289318 | 3 | 3  | 0.05670724 | 0.30102999 |
| chr5 | 1933186   | 2059946   | 126761 | 3 | 5 | 2 | 0.45545077 | 0.0429175  | 3 | 4  | 0.05670724 | 0.47744371 |
| chr5 | 2059946   | 2167697   | 107752 | 2 | 5 | 2 | 0.45545077 | 0.01091641 | 3 | 3  | 0.05670724 | 0.76005302 |
| chr5 | 2167697   | 2359386   | 191690 | 3 | 5 | 1 | 0.45545077 | 0.02438896 | 3 | 3  | 0.05670724 | 0.51676182 |
| chr5 | 2359386   | 2359444   | 59     | 1 | 5 | 1 | 0.45545077 | 0.01091641 | 3 | 4  | 0.05670724 | 0.76005302 |
| chr5 | 2359444   | 2700742   | 341299 | 4 | 5 | 1 | 0.45545077 | 0.02438896 | 3 | 3  | 0.05670724 | 0.51676182 |
| chr5 | 2700742   | 3104552   | 403811 | 7 | 6 | 1 | 0.63695542 | 0.02438896 | 3 | 3  | 0.03070643 | 0.51676182 |
| chr5 | 3104552   | 3192024   | 87473  | 1 | 6 | 1 | 0.91219088 | 0.02438896 | 2 | 6  | 0.10153319 | 0.51676182 |
| chr5 | 3192024   | 3286528   | 94505  | 1 | 5 | 0 | 0.68214471 | 0.02438896 | 2 | 1  | 0.02162467 | 0.30102999 |
| chr5 | 3286528   | 3404299   | 117772 | 2 | 5 | 0 | 0.45545077 | 0.02438896 | 2 | 1  | 0.05670724 | 0.30102999 |
| chr5 | 3404299   | 3404358   | 60     | 1 | 6 | 0 | 0.44141547 | 0.02438896 | 2 | 4  | 0.06713722 | 0.30102999 |
| chr5 | 3404358   | 3503104   | 98747  | 1 | 5 | 0 | 0.45545077 | 0.02438896 | 2 | 1  | 0.05670724 | 0.30102999 |
| chr5 | 3503104   | 3503163   | 60     | 1 | 5 | 0 | 0.45545077 | 0.02438896 | 2 | 1  | 0.05670724 | 0.61140001 |
| chr5 | 3503163   | 3660708   | 157546 | 2 | 5 | 0 | 0.45545077 | 0.02438896 | 2 | 1  | 0.05670724 | 0.30102999 |
| chr5 | 3660708   | 3660767   | 60     | 1 | 5 | 0 | 0.45545077 | 0.02438896 | 2 | 1  | 0.05670724 | 0.93173516 |
| chr5 | 3660767   | 4065664   | 404898 | 6 | 5 | 0 | 0.45545077 | 0.02438896 | 2 | 3  | 0.05670724 | 0.61140001 |
| chr5 | 4065664   | 4349436   | 283773 | 4 | 5 | 0 | 0.30102999 | 0.02438896 | 2 | 4  | 0.11390336 | 0.61140001 |
| chr5 | 4349436   | 4382440   | 33005  | 2 | 5 | 0 | 0.19510895 | 0.02438896 | 2 | 5  | 0.19510895 | 0.61140001 |
| chr5 | 4382440   | 4641409   | 258970 | 3 | 5 | 0 | 0.19510895 | 0.02438896 | 2 | 5  | 0.19510895 | 0.30102999 |
| chr5 | 4641409   | 4641468   | 60     | 1 | 7 | 0 | 0.30102999 | 0.02438896 | 2 | 6  | 0.129913   | 0.30102999 |
| chr5 | 4641468   | 4894797   | 253330 | 2 | 6 | 0 | 0.44141547 | 0.02438896 | 2 | 4  | 0.06713722 | 0.30102999 |
| chr5 | 4894797   | 4894856   | 60     | 1 | 6 | 0 | 0.44141547 | 0.02438896 | 2 | 4  | 0.06713722 | 0.61140001 |
| chr5 | 4894856   | 5123280   | 228425 | 3 | 4 | 0 | 0.18734596 | 0.02438896 | 2 | 4  | 0.18734596 | 0.61140001 |
| chr5 | 5123280   | 5290095   | 166816 | 4 | 4 | 0 | 0.18734596 | 0.02438896 | 2 | 3  | 0.18734596 | 0.93173516 |
| chr5 | 5290095   | 5290154   | 60     | 1 | 5 | 0 | 0.30102999 | 0.02438896 | 2 | 4  | 0.11390336 | 0.93173516 |
| chr5 | 5290154   | 5407990   | 117837 | 2 | 5 | 0 | 0.30102999 | 0.02438896 | 2 | 4  | 0.11390336 | 0.61140001 |
| chr5 | 5407990   | 5408049   | 60     | 1 | 5 | 0 | 0.30102999 | 0.02438896 | 2 | 4  | 0.11390336 | 1.26272838 |
| chr5 | 5408049   | 5471345   | 63297  | 1 | 5 | 0 | 0.30102999 | 0.02438896 | 2 | 3  | 0.11390336 | 0.93173516 |
| chr5 | 5471345   | 5591790   | 120446 | 1 | 5 | 0 | 0.30102999 | 0.02438896 | 2 | 4  | 0.11390336 | 0.61140001 |
| chr5 | 5591790   | 5804136   | 212347 | 2 | 5 | 0 | 0.19510895 | 0.02438896 | 2 | 5  | 0.19510895 | 0.61140001 |
| chr5 | 5804136   | 5804195   | 60     | 1 | 6 | 0 | 0.30102999 | 0.02438896 | 2 | 5  | 0.12309572 | 1.26272838 |
| chr5 | 5804195   | 5956060   | 151866 | 1 | 3 | 0 | 0.05670724 | 0.02438896 | 2 | 3  | 0.05670724 | 0.93173516 |
| chr5 | 5956060   | 6112711   | 156652 | 1 | 2 | 0 | 0.02162467 | 0.02438896 | 2 | 5  | 0.68214471 | 0.93173516 |
| chr5 | 6112711   | 6112770   | 60     | 1 | 2 | 0 | 0.02162467 | 0.02438896 | 2 | 4  | 0.68214471 | 1.26272838 |
| chr5 | 6112770   | 6250083   | 137314 | 1 | 2 | 0 | 0.08289318 | 0.02438896 | 2 | 3  | 0.30102999 | 0.93173516 |
| chr5 | 6250083   | 6341184   | 91102  | 2 | 2 | 0 | 0.1575501  | 0.02438896 | 2 | 3  | 0.1575501  | 0.93173516 |
| chr5 | 6341184   | 6414428   | 73245  | 2 | 2 | 0 | 0.08289318 | 0.02438896 | 2 | 3  | 0.30102999 | 0.93173516 |
| chr5 | 6414428   | 6414487   | 60     | 1 | 2 | 0 | 0.08289318 | 0.02438896 | 2 | 4  | 0.30102999 | 1.26272838 |
| chr5 | 6414487   | 6578122   | 163636 | 2 | 2 | 0 | 0.30102999 | 0.02438896 | 2 | 2  | 0.05404976 | 0.61140001 |
| chr5 | 6578122   | 6632269   | 54148  | 2 | 2 | 0 | 0.08289318 | 0.02438896 | 2 | 4  | 0.30102999 | 1.26272838 |
| chr5 | 6632269   | 6707258   | 74990  | 2 | 2 | 0 | 0.08289318 | 0.02438896 | 2 | 3  | 0.30102999 | 0.93173516 |
| chr5 | 6707258   | 6753894   | 46637  | 2 | 3 | 0 | 0.17593012 | 0.02438896 | 2 | 3  | 0.17593012 | 0.93173516 |
| chr5 | 6753894   | 6753953   | 60     | 1 | 4 | 0 | 0.30102999 | 0.02438896 | 2 | 3  | 0.10122019 | 0.93173516 |
| chr5 | 6753953   | 6910791   | 156839 | 2 | 3 | 0 | 0.17593012 | 0.02438896 | 2 | 3  | 0.17593012 | 0.93173516 |
| chr5 | 6910791   | 6910850   | 60     | 1 | 4 | 0 | 0.30102999 | 0.02438896 | 2 | 3  | 0.10122019 | 0.93173516 |
| chr5 | 6910850   | 7144564   | 233715 | 2 | 4 | 0 | 0.30102999 | 0.02438896 | 2 | 3  | 0.10122019 | 0.61140001 |
| chr5 | 7144564   | 7144623   | 60     | 1 | 5 | 0 | 0.45545077 | 0.02438896 | 2 | 2  | 0.05670724 | 0.61140001 |
| chr5 | 7144623   | 7315237   | 170605 | 1 | 4 | 0 | 0.30102999 | 0.02438896 | 2 | 3  | 0.10122019 | 0.61140001 |
| chr5 | 7315237   | 7315286   | 60     | 1 | 3 | 0 | 0.30102999 | 0.02438896 | 2 | 3  | 0.10122019 | 0.93173516 |
| chr5 | 7315286   | 7383218   | 67933  | 1 | 3 | 0 | 0.17593012 | 0.02438896 | 2 | 3  | 0.17593012 | 0.93173516 |
| chr5 | 7383218   | 7570834   | 187617 | 5 | 3 | 0 | 0.17593012 | 0.02438896 | 2 | 2  | 0.17593012 | 0.61140001 |
| chr5 | 7570834   | 7639686   | 68853  | 1 | 3 | 0 | 0.17593012 | 0.02438896 | 2 | 3  | 0.17593012 | 0.30102999 |
| chr5 | 7639686   | 7749693   | 110008 | 3 | 4 | 0 | 0.30102999 | 0.02438896 | 2 | 1  | 0.10122019 | 0.30102999 |
| chr5 | 7749693   | 7827355   | 77663  | 2 | 4 | 0 | 0.18734596 | 0.02438896 | 2 | 4  | 0.18734596 | 0.30102999 |
| chr5 | 7827355   | 8288012   | 460558 | 5 | 5 | 0 | 0.30102999 | 0.02438896 | 2 | 4  | 0.11390336 | 0.30102999 |
| chr5 | 8288012   | 8288071   | 60     | 1 | 8 | 0 | 0.79906872 | 0.02438896 | 2 | 4  | 0.02079498 | 0.30102999 |
| chr5 | 8288071   | 8561544   | 273474 | 2 | 7 | 0 | 0.60763643 | 0.02438896 | 2 | 4  | 0.03812622 | 0.30102999 |
| chr5 | 8561544   | 8561603   | 60     | 1 | 2 | 0 | 0.58747015 | 0.02438896 | 2 | 5  | 0.04407651 | 0.30102999 |
| chr5 | 8561603   | 8747001   | 185399 | 2 | 7 | 0 | 0.43181735 | 0.02438896 | 2 | 5  | 0.07511598 | 0.30102999 |
| chr5 | 8747001   | 8982448   | 235448 | 2 | 7 | 0 | 0.30102999 | 0.02438896 | 2 | 6  | 0.129913   | 0.30102999 |
| chr5 | 8982448   | 9181533   | 199086 | 5 | 7 | 0 | 0.13499366 | 0.02438896 | 2 | 8  | 0.30102999 | 0.30102999 |
| chr5 | 9181533   | 9323329   | 141797 | 3 | 7 | 0 | 0.20469099 | 0.02438896 | 2 | 7  | 0.20469099 | 0.30102999 |
| chr5 | 9323329   | 9323388   | 60     | 1 | 8 | 0 | 0.20764654 | 0.02438896 | 2 | 8  | 0.20764654 | 0.30102999 |
| chr5 | 9323388   | 9440670   | 117283 | 2 | 8 | 0 | 0.30102999 | 0.02438896 | 2 | 7  | 0.13499366 | 0.30102999 |
| chr5 | 9440670   | 9691889   | 251220 | 6 | 8 | 0 | 0.20764654 | 0.02438896 | 2 | 8  | 0.20764654 | 0.30102999 |
| chr5 | 9691889   | 9762627   | 70739  | 1 | 7 | 0 | 0.13499366 | 0.02438896 | 2 | 8  | 0.30102999 | 0.30102999 |
| chr5 | 9762627   | 9843524   | 80898  | 2 | 7 | 0 | 0.13499366 | 0.02438896 | 2 | 8  | 0.30102999 | 0.61140001 |
| chr5 | 9843524   | 9843583   | 60     | 1 | 8 | 0 | 0.20764654 | 0.02438896 | 2 | 8  | 0.20764654 | 0.61140001 |
| chr5 | 9843583   | 10378871  | 535289 | 7 | 7 | 0 | 0.13499366 | 0.02438896 | 2 | 8  | 0.30102999 | 0.61140001 |
| chr5 | 10378871  | 10435064  | 56194  | 3 | 7 | 0 | 0.08584816 | 0.02438896 | 2 | 9  | 0.42015402 | 0.61140001 |
| chr5 | 10435064  | 10586857  | 151794 | 4 | 7 | 0 | 0.13499366 | 0.02438896 | 2 | 8  | 0.30102999 | 0.61140001 |
| chr5 | 10586857  | 10707514  | 120658 | 4 | 7 | 0 | 0.08584816 | 0.02438896 |   |    |            |            |

|      |          |          |        |   |    |   |            |            |   |   |            |            |
|------|----------|----------|--------|---|----|---|------------|------------|---|---|------------|------------|
| chr5 | 15601832 | 15676173 | 74342  | 2 | 4  | 0 | 0.11390336 | 0          | 5 | 2 | 0.3102999  | 0.6114001  |
| chr5 | 15676173 | 15877944 | 201772 | 4 | 3  | 0 | 0.05670724 | 0          | 5 | 2 | 0.45545077 | 0.6114001  |
| chr5 | 15877944 | 15904484 | 26541  | 2 | 5  | 0 | 0.12309572 | 0          | 6 | 2 | 0.3102999  | 0.6114001  |
| chr5 | 15904484 | 15995450 | 90967  | 2 | 4  | 0 | 0.06713722 | 0          | 6 | 2 | 0.44141547 | 0.6114001  |
| chr5 | 15995450 | 16057648 | 62199  | 1 | 4  | 0 | 0.11390336 | 0          | 5 | 1 | 0.3102999  | 0.30102999 |
| chr5 | 16057648 | 16119901 | 62254  | 2 | 6  | 0 | 0.20064824 | 0          | 6 | 1 | 0.20064824 | 0.30102999 |
| chr5 | 16119901 | 16207386 | 87486  | 2 | 5  | 0 | 0.12309572 | 0          | 6 | 1 | 0.3102999  | 0.30102999 |
| chr5 | 16207386 | 16372182 | 164797 | 1 | 4  | 0 | 0.11390336 | 0          | 5 | 1 | 0.3102999  | 0.30102999 |
| chr5 | 16372182 | 16451599 | 79418  | 1 | 4  | 0 | 0.18734596 | 0          | 4 | 1 | 0.18734596 | 0.30102999 |
| chr5 | 16451599 | 16456553 | 4955   | 2 | 5  | 0 | 0.19510895 | 0          | 5 | 1 | 0.19510895 | 0.30102999 |
| chr5 | 16456553 | 16503362 | 46810  | 3 | 5  | 0 | 0.12309572 | 0          | 6 | 1 | 0.3102999  | 0.30102999 |
| chr5 | 16503362 | 16590184 | 86823  | 2 | 4  | 0 | 0.11390336 | 0          | 5 | 1 | 0.3102999  | 0.30102999 |
| chr5 | 16590184 | 16590243 | 60     | 1 | 5  | 0 | 0.19510895 | 0          | 5 | 1 | 0.19510895 | 0.30102999 |
| chr5 | 16590243 | 16620812 | 30570  | 1 | 4  | 0 | 0.11390336 | 0          | 5 | 1 | 0.3102999  | 0.30102999 |
| chr5 | 16620812 | 16620871 | 60     | 1 | 4  | 0 | 0.11390336 | 0          | 5 | 2 | 0.3102999  | 0.6114001  |
| chr5 | 16620871 | 16660012 | 39142  | 1 | 3  | 0 | 0.05670724 | 0          | 5 | 2 | 0.45545077 | 0.6114001  |
| chr5 | 16660012 | 16779642 | 119631 | 2 | 1  | 0 | 0.00478973 | 0          | 5 | 2 | 1.02643191 | 0.6114001  |
| chr5 | 16779642 | 16855353 | 75712  | 3 | 2  | 0 | 0.02162467 | 0          | 5 | 2 | 0.68214471 | 0.6114001  |
| chr5 | 16855353 | 17014228 | 158876 | 2 | 1  | 0 | 0.00478973 | 0          | 5 | 2 | 1.02643191 | 0.6114001  |
| chr5 | 17014228 | 17014287 | 60     | 4 | 2  | 0 | 0.01053319 | 0          | 6 | 2 | 0.91219088 | 0.6114001  |
| chr5 | 17014287 | 17256894 | 242698 | 1 | 2  | 0 | 0.02162467 | 0          | 5 | 2 | 0.68214471 | 0.6114001  |
| chr5 | 17256894 | 17425663 | 168680 | 5 | 3  | 0 | 0.05670724 | 0          | 5 | 3 | 0.45545077 | 0.6114001  |
| chr5 | 17425663 | 17425722 | 60     | 1 | 3  | 0 | 0.01598258 | 0          | 7 | 2 | 0.84395715 | 0.6114001  |
| chr5 | 17425722 | 17652752 | 227031 | 1 | 3  | 0 | 0.01091641 | 0          | 4 | 0 | 0.76005302 | 0          |
| chr5 | 17652752 | 17811948 | 159197 | 3 | 2  | 0 | 0.0429175  | 0          | 4 | 0 | 0.47744371 | 0          |
| chr5 | 17811948 | 17812007 | 60     | 1 | 2  | 0 | 0.02162467 | 0          | 5 | 0 | 0.68214471 | 0          |
| chr5 | 17812007 | 18098980 | 286974 | 2 | 1  | 0 | 0.01091641 | 0          | 4 | 0 | 0.76005302 | 0          |
| chr5 | 18098980 | 18215617 | 116638 | 1 | 0  | 0 | 0          | 0          | 4 | 0 | 1.26272838 | 0          |
| chr5 | 18215617 | 18215676 | 60     | 1 | 0  | 0 | 0          | 0          | 4 | 1 | 1.26272838 | 0.30102999 |
| chr5 | 18215676 | 18561815 | 346140 | 2 | 0  | 0 | 0          | 0          | 4 | 0 | 1.26272838 | 0          |
| chr5 | 18561815 | 18703074 | 141260 | 2 | 1  | 0 | 0.00478973 | 0          | 5 | 1 | 1.02643191 | 0.30102999 |
| chr5 | 18703074 | 18703133 | 60     | 1 | 4  | 0 | 0.02074938 | 0          | 8 | 1 | 0.79906872 | 0.30102999 |
| chr5 | 18703133 | 18996995 | 293863 | 2 | 1  | 0 | 0.00478973 | 0          | 5 | 1 | 1.02643191 | 0.30102999 |
| chr5 | 18996995 | 18997054 | 60     | 1 | 3  | 0 | 0.0079614  | 0          | 8 | 1 | 1.07548421 | 0.30102999 |
| chr5 | 18997054 | 19204238 | 207185 | 1 | 1  | 0 | 0.00478973 | 0          | 5 | 1 | 1.02643191 | 0.30102999 |
| chr5 | 19204238 | 19327188 | 122951 | 2 | 2  | 0 | 0.02162467 | 0          | 5 | 1 | 0.68214471 | 0.30102999 |
| chr5 | 19327188 | 19327247 | 60     | 1 | 4  | 0 | 0.06713722 | 0          | 6 | 1 | 0.44141547 | 0.30102999 |
| chr5 | 19327247 | 19453333 | 126087 | 1 | 3  | 0 | 0.03070643 | 0          | 6 | 1 | 0.63695542 | 0.30102999 |
| chr5 | 19453333 | 19453392 | 60     | 1 | 4  | 0 | 0.06713722 | 0          | 6 | 1 | 0.44141547 | 0.30102999 |
| chr5 | 19453392 | 19537833 | 84442  | 2 | 3  | 0 | 0.03070643 | 0          | 6 | 1 | 0.63695542 | 0.30102999 |
| chr5 | 19537833 | 19606080 | 68248  | 2 | 2  | 0 | 0.02162467 | 0          | 5 | 1 | 0.68214471 | 0.30102999 |
| chr5 | 19606080 | 19668883 | 62804  | 1 | 2  | 0 | 0.0429175  | 0          | 4 | 1 | 0.47744371 | 0.30102999 |
| chr5 | 19668883 | 19668942 | 60     | 1 | 5  | 0 | 0.12309572 | 0          | 6 | 2 | 0.3102999  | 0.6114001  |
| chr5 | 19668942 | 19793209 | 124268 | 3 | 0  | 0 | 0.10122019 | 0          | 4 | 2 | 0.3102999  | 0.6114001  |
| chr5 | 19793209 | 19886283 | 93075  | 3 | 3  | 1 | 0.05670724 | 0.05404976 | 5 | 2 | 0.45545077 | 0.30102999 |
| chr5 | 19886283 | 20049711 | 163429 | 3 | 3  | 1 | 0.05670724 | 0.1218695  | 5 | 1 | 0.45545077 | 0.1218695  |
| chr5 | 20049711 | 20225601 | 175891 | 4 | 3  | 1 | 0.03070643 | 0.05404976 | 6 | 2 | 0.63695542 | 0.30102999 |
| chr5 | 20225601 | 20474807 | 249207 | 3 | 3  | 1 | 0.05670724 | 0.05404976 | 5 | 2 | 0.45545077 | 0.30102999 |
| chr5 | 20474807 | 20563995 | 89189  | 1 | 3  | 1 | 0.10122019 | 0.05404976 | 4 | 2 | 0.3102999  | 0.30102999 |
| chr5 | 20563995 | 20693629 | 129635 | 2 | 2  | 1 | 0.0429175  | 0.05404976 | 4 | 2 | 0.47744371 | 0.30102999 |
| chr5 | 20693629 | 20792200 | 98572  | 1 | 2  | 0 | 0.0429175  | 0          | 4 | 1 | 0.47744371 | 0.30102999 |
| chr5 | 20792200 | 21001561 | 209362 | 3 | 2  | 0 | 0.02162467 | 0          | 5 | 1 | 0.68214471 | 0.30102999 |
| chr5 | 21001561 | 21001620 | 60     | 1 | 2  | 1 | 0.02162467 | 0.1218695  | 5 | 1 | 0.68214471 | 0.1218695  |
| chr5 | 21001620 | 21173362 | 171743 | 1 | 2  | 0 | 0.0429175  | 0          | 4 | 1 | 0.47744371 | 0.30102999 |
| chr5 | 21173362 | 21173421 | 60     | 1 | 3  | 0 | 0.10122019 | 0          | 4 | 1 | 0.3102999  | 0.30102999 |
| chr5 | 21173421 | 21269457 | 96037  | 1 | 2  | 0 | 0.0429175  | 0          | 4 | 1 | 0.47744371 | 0.30102999 |
| chr5 | 21269457 | 21594606 | 325150 | 2 | 1  | 0 | 0.01091641 | 0          | 4 | 1 | 0.76005302 | 0.30102999 |
| chr5 | 21594606 | 21594665 | 60     | 1 | 2  | 1 | 0.02162467 | 0.1218695  | 5 | 1 | 0.68214471 | 0.1218695  |
| chr5 | 21594665 | 21854398 | 259734 | 4 | 1  | 0 | 0.00478973 | 0          | 5 | 1 | 1.02643191 | 0.30102999 |
| chr5 | 21854398 | 21854457 | 60     | 1 | 3  | 0 | 0.05670724 | 0          | 5 | 1 | 0.45545077 | 0.30102999 |
| chr5 | 21854457 | 22187544 | 333088 | 4 | 1  | 0 | 0.00478973 | 0          | 5 | 1 | 1.02643191 | 0.30102999 |
| chr5 | 22187544 | 22246012 | 58469  | 1 | 0  | 0 | 0.00478973 | 0          | 5 | 0 | 1.02643191 | 0          |
| chr5 | 22246012 | 22306108 | 60097  | 2 | 3  | 0 | 0.05670724 | 0          | 5 | 0 | 0.45545077 | 0          |
| chr5 | 22306108 | 22691751 | 385644 | 8 | 3  | 0 | 0.03070643 | 0          | 6 | 0 | 0.63695542 | 0          |
| chr5 | 22691751 | 22814651 | 122811 | 2 | 2  | 0 | 0.02162467 | 0          | 5 | 0 | 0.68214471 | 0          |
| chr5 | 22814651 | 22814620 | 60     | 1 | 60 | 1 | 0.02162467 | 0.3102999  | 5 | 0 | 0.68214471 | 0          |
| chr5 | 22814620 | 2300373  | 185754 | 2 | 1  | 0 | 0.00478973 | 0.3102999  | 5 | 0 | 1.02643191 | 0          |
| chr5 | 2300373  | 23000432 | 60     | 1 | 2  | 1 | 0.02162467 | 0.3102999  | 5 | 0 | 0.68214471 | 0          |
| chr5 | 23000432 | 23117939 | 117508 | 1 | 1  | 0 | 0.00478973 | 0          | 5 | 0 | 1.02643191 | 0          |
| chr5 | 23117939 | 23283337 | 165399 | 2 | 2  | 0 | 0.00493743 | 0          | 7 | 0 | 1.16581773 | 0          |
| chr5 | 23283337 | 23524228 | 240892 | 3 | 2  | 0 | 0.01053319 | 0          | 6 | 0 | 0.91219088 | 0          |
| chr5 | 23524228 | 23524286 | 59     | 1 | 2  | 1 | 0.01053319 | 0.3102999  | 6 | 0 | 0.91219088 | 0          |
| chr5 | 23524286 | 23607162 | 82877  | 1 | 1  | 1 | 0.00204627 | 0.3102999  | 6 | 0 | 1.31360226 | 0          |
| chr5 | 23607162 | 23821705 | 214544 | 1 | 0  | 0 | 0          | 0          | 6 | 0 | 1.95986592 | 0          |
| chr5 | 23821705 | 23968179 | 146475 | 1 | 0  | 0 | 0          | 0          | 5 | 0 | 1.60515106 | 0          |
| chr5 | 23968179 | 24072689 | 104511 | 4 | 0  | 1 | 0          | 0.1218695  | 5 | 1 | 1.60515106 | 0.1218695  |
| chr5 | 24072689 | 24178293 | 105605 | 2 | 0  | 1 | 0          | 0.1218695  | 4 | 1 | 1.26272838 | 0.1218695  |
| chr5 | 24178293 | 24188509 | 10217  | 2 | 1  | 1 | 0.00204627 | 0.1218695  | 6 | 1 | 1.31360226 | 0.1218695  |
| chr5 | 24188509 | 24644745 | 456237 | 6 | 0  | 1 | 0.1218695  | 0          | 4 | 1 | 1.26272838 | 0.1218695  |
| chr5 | 24644745 | 24666557 | 21813  | 2 | 1  | 1 | 0.01091641 | 0.1218695  | 4 | 1 | 0.76005302 | 0.1218695  |
| chr5 | 24666557 | 24976470 | 309914 | 2 | 0  | 1 | 0.1218695  | 0          | 4 | 1 | 1.26272838 | 0.1218695  |
| chr5 | 24976470 | 25104177 | 127708 | 1 | 0  | 1 | 0          | 0.1218695  | 3 | 1 | 0.93173516 | 0.1218695  |
| chr5 | 25104177 | 25166170 | 61994  | 2 | 0  | 1 | 0          | 0.3102999  | 3 | 1 | 0.93173516 | 0.05404976 |
| chr5 | 25166170 | 25281091 | 114922 | 1 | 0  | 1 | 0          | 0.1218695  | 2 | 1 | 0.6114001  | 0.1218695  |
| chr5 | 25281091 | 25469388 | 188298 | 1 | 0  | 0 | 0          | 0          | 2 | 1 | 0.6114001  | 0.30102999 |
| chr5 | 25469388 | 26287290 | 219225 | 2 | 0  | 0 | 0          | 0          | 2 | 1 | 0.6114001  | 0.30102999 |
| chr5 | 26287290 | 26768618 | 481329 | 4 | 0  | 1 | 0          | 0.05404976 | 2 | 2 | 0.6114001  | 0.30102999 |
| chr5 | 26768618 | 26946671 | 178054 | 5 | 0  | 1 | 0          | 0.05404976 | 3 | 2 | 0.93173516 | 0.30102999 |
| chr5 | 26946671 | 27098938 | 152268 | 3 | 0  | 0 | 0          | 0          | 3 | 0 | 0.93173516 | 0          |
| chr5 | 27098938 | 27350139 | 251202 | 3 | 0  | 0 | 0          | 0          | 4 | 0 | 1.26272838 | 0          |
| chr5 | 27350139 | 27350198 | 60     | 1 | 2  | 0 | 0          | 0.3102999  | 4 | 1 | 1.26272838 | 0.05404976 |
| chr5 | 27350198 | 27831015 | 480818 | 2 | 0  | 1 | 0          | 0.1218695  | 4 | 1 | 1.26272838 | 0.1218695  |
| chr5 | 27831015 | 27979981 | 148967 | 1 | 0  | 1 | 0          | 0.3102999  | 3 | 0 | 0.93173516 | 0          |
| chr5 | 27979981 | 27980040 | 60     | 1 | 0  | 2 | 0          | 0.6114001  | 3 | 0 | 0.93173516 | 0          |
| chr5 | 27980040 | 28393916 | 413877 | 2 | 0  | 1 | 0          | 0.3102999  | 3 | 0 | 0.93173516 | 0          |
| chr5 | 28393916 | 29048764 | 654849 | 6 | 0  | 2 | 0          | 0.6114001  | 3 | 0 | 0.93173516 | 0          |
| chr5 | 29048764 | 29152795 | 104032 | 2 | 0  | 0 | 0          | 0.3102999  | 3 | 0 | 0.93173516 | 0.05404976 |
| chr5 | 29152795 | 29371965 | 219171 | 1 | 0  | 1 | 0          | 0.1218695  | 2 | 1 | 0          |            |

|      |          |          |        |    |   |   |            |            |   |   |            |            |
|------|----------|----------|--------|----|---|---|------------|------------|---|---|------------|------------|
| chr5 | 33120547 | 33247771 | 127225 | 2  | 3 | 3 | 0.03070643 | 0.17593012 | 6 | 3 | 0.63695542 | 0.17593012 |
| chr5 | 33247771 | 33287601 | 39831  | 1  | 3 | 2 | 0.03070643 | 0.08289318 | 6 | 3 | 0.63695542 | 0.30102999 |
| chr5 | 33287601 | 33402372 | 114772 | 2  | 3 | 2 | 0.03070643 | 0.1755501  | 6 | 2 | 0.63695542 | 0.1755501  |
| chr5 | 33402372 | 33508899 | 106528 | 2  | 3 | 2 | 0.03070643 | 0.30102999 | 6 | 1 | 0.63695542 | 0.05404976 |
| chr5 | 33508899 | 33508958 | 60     | 1  | 3 | 2 | 0.03070643 | 0.1755501  | 6 | 2 | 0.63695542 | 0.1755501  |
| chr5 | 33508958 | 33683120 | 174163 | 3  | 3 | 2 | 0.03070643 | 0.30102999 | 6 | 1 | 0.63695542 | 0.05404976 |
| chr5 | 33683120 | 33683173 | 54     | 1  | 3 | 2 | 0.03070643 | 0.1755501  | 6 | 2 | 0.63695542 | 0.1755501  |
| chr5 | 33683173 | 33719802 | 36630  | 1  | 2 | 2 | 0.01053319 | 0.1755501  | 6 | 2 | 0.91219088 | 0.1755501  |
| chr5 | 33719802 | 33764808 | 45007  | 1  | 2 | 2 | 0.01053319 | 0.30102999 | 6 | 1 | 0.91219088 | 0.05404976 |
| chr5 | 33764808 | 33881366 | 116559 | 2  | 2 | 1 | 0.02162467 | 0.1218695  | 5 | 1 | 0.68214471 | 0.1218695  |
| chr5 | 33881366 | 33947411 | 66046  | 2  | 2 | 2 | 0.01053319 | 0.30102999 | 6 | 1 | 0.91219088 | 0.05404976 |
| chr5 | 33947411 | 34073756 | 126346 | 8  | 2 | 2 | 0.01053319 | 0.1755501  | 6 | 2 | 0.91219088 | 0.1755501  |
| chr5 | 34073756 | 34410322 | 336567 | 2  | 2 | 2 | 0.0429175  | 0.1755501  | 4 | 2 | 0.47744371 | 0.1755501  |
| chr5 | 34410322 | 34559420 | 149099 | 2  | 2 | 2 | 0.01053319 | 0.1755501  | 6 | 2 | 0.91219088 | 0.1755501  |
| chr5 | 34559420 | 34611593 | 52174  | 2  | 2 | 2 | 0.00493743 | 0.1755501  | 7 | 2 | 1.16581773 | 0.1755501  |
| chr5 | 34611593 | 34663720 | 52128  | 1  | 2 | 2 | 0.01053319 | 0.1755501  | 6 | 2 | 0.91219088 | 0.1755501  |
| chr5 | 34663720 | 34663779 | 60     | 1  | 3 | 2 | 0.01053319 | 0.30102999 | 6 | 2 | 0.91219088 | 0.08289318 |
| chr5 | 34663779 | 34685933 | 22155  | 1  | 2 | 3 | 0.02162467 | 0.30102999 | 5 | 2 | 0.68214471 | 0.08289318 |
| chr5 | 34685933 | 34744070 | 58138  | 1  | 2 | 2 | 0.02162467 | 0.1755501  | 5 | 2 | 0.68214471 | 0.1755501  |
| chr5 | 34744070 | 34796020 | 51951  | 2  | 2 | 2 | 0.01053319 | 0.1755501  | 6 | 2 | 0.91219088 | 0.1755501  |
| chr5 | 34796020 | 34847496 | 51477  | 3  | 2 | 3 | 0.00493743 | 0.30102999 | 7 | 2 | 1.16581773 | 0.08289318 |
| chr5 | 34847496 | 34913930 | 66435  | 2  | 3 | 2 | 0.01053319 | 0.30102999 | 6 | 2 | 0.91219088 | 0.08289318 |
| chr5 | 34913930 | 35010242 | 96313  | 4  | 2 | 3 | 0.00493743 | 0.30102999 | 7 | 2 | 1.16581773 | 0.08289318 |
| chr5 | 35010242 | 35049017 | 38776  | 2  | 2 | 3 | 0.01053319 | 0.30102999 | 6 | 2 | 0.91219088 | 0.08289318 |
| chr5 | 35049017 | 35049069 | 53     | 1  | 2 | 3 | 0.00493743 | 0.30102999 | 7 | 2 | 1.16581773 | 0.08289318 |
| chr5 | 35049069 | 35155562 | 106494 | 2  | 2 | 3 | 0.01053319 | 0.30102999 | 6 | 2 | 0.91219088 | 0.08289318 |
| chr5 | 35155562 | 35155621 | 60     | 1  | 2 | 4 | 0.01053319 | 0.47744371 | 6 | 2 | 0.91219088 | 0.0429175  |
| chr5 | 35155621 | 35213780 | 58160  | 1  | 2 | 4 | 0.02162467 | 0.47744371 | 5 | 2 | 0.68214471 | 0.0429175  |
| chr5 | 35213780 | 35430004 | 216225 | 2  | 2 | 4 | 0.0429175  | 0.47744371 | 4 | 2 | 0.47744371 | 0.0429175  |
| chr5 | 35430004 | 35430063 | 60     | 1  | 2 | 4 | 0.02162467 | 0.47744371 | 5 | 2 | 0.68214471 | 0.0429175  |
| chr5 | 35430063 | 36110857 | 680795 | 17 | 2 | 4 | 0.0429175  | 0.47744371 | 4 | 2 | 0.47744371 | 0.0429175  |
| chr5 | 36110857 | 36110916 | 60     | 1  | 2 | 4 | 0.02162467 | 0.47744371 | 5 | 2 | 0.68214471 | 0.0429175  |
| chr5 | 36110916 | 36520866 | 409951 | 10 | 2 | 4 | 0.0429175  | 0.47744371 | 4 | 2 | 0.47744371 | 0.0429175  |
| chr5 | 36520866 | 36520925 | 60     | 1  | 2 | 4 | 0.02162467 | 0.47744371 | 5 | 2 | 0.68214471 | 0.0429175  |
| chr5 | 36520925 | 36655780 | 134856 | 3  | 2 | 4 | 0.0429175  | 0.47744371 | 4 | 2 | 0.47744371 | 0.0429175  |
| chr5 | 36655780 | 36655839 | 60     | 1  | 2 | 4 | 0.02162467 | 0.47744371 | 5 | 2 | 0.68214471 | 0.0429175  |
| chr5 | 36655839 | 36809705 | 153867 | 2  | 2 | 3 | 0.0429175  | 0.30102999 | 4 | 2 | 0.47744371 | 0.08289318 |
| chr5 | 36809705 | 36809764 | 60     | 1  | 2 | 4 | 0.02162467 | 0.30102999 | 5 | 3 | 0.68214471 | 0.10122019 |
| chr5 | 36809764 | 36944458 | 134695 | 2  | 2 | 4 | 0.02162467 | 0.47744371 | 5 | 2 | 0.68214471 | 0.0429175  |
| chr5 | 36944458 | 37016145 | 71688  | 2  | 2 | 4 | 0.0429175  | 0.30102999 | 4 | 2 | 0.47744371 | 0.08289318 |
| chr5 | 37016145 | 37061019 | 44875  | 2  | 2 | 4 | 0.0429175  | 0.47744371 | 4 | 2 | 0.47744371 | 0.0429175  |
| chr5 | 37061019 | 37158302 | 97284  | 4  | 2 | 3 | 0.0429175  | 0.30102999 | 4 | 2 | 0.47744371 | 0.08289318 |
| chr5 | 37158302 | 37239267 | 80966  | 2  | 2 | 3 | 0.02162467 | 0.30102999 | 5 | 2 | 0.68214471 | 0.08289318 |
| chr5 | 37239267 | 37292092 | 52826  | 1  | 2 | 3 | 0.02162467 | 0.51676182 | 5 | 1 | 0.68214471 | 0.02438896 |
| chr5 | 37292092 | 37292146 | 55     | 1  | 2 | 3 | 0.01053319 | 0.51676182 | 6 | 1 | 0.91219088 | 0.02438896 |
| chr5 | 37292146 | 37437095 | 144950 | 3  | 2 | 3 | 0.02162467 | 0.51676182 | 5 | 1 | 0.68214471 | 0.02438896 |
| chr5 | 37437095 | 37437154 | 60     | 1  | 2 | 3 | 0.02162467 | 0.30102999 | 5 | 2 | 0.68214471 | 0.08289318 |
| chr5 | 37437154 | 37516603 | 79450  | 2  | 2 | 3 | 0.02162467 | 0.51676182 | 5 | 1 | 0.68214471 | 0.02438896 |
| chr5 | 37516603 | 37516662 | 60     | 1  | 2 | 3 | 0.02162467 | 0.30102999 | 5 | 2 | 0.68214471 | 0.08289318 |
| chr5 | 37516662 | 37605145 | 88484  | 2  | 2 | 3 | 0.08289318 | 0.30102999 | 3 | 2 | 0.30102999 | 0.08289318 |
| chr5 | 37605145 | 37605199 | 55     | 1  | 2 | 3 | 0.02162467 | 0.30102999 | 5 | 2 | 0.68214471 | 0.08289318 |
| chr5 | 37605199 | 37648574 | 43376  | 1  | 2 | 3 | 0.08289318 | 0.30102999 | 3 | 2 | 0.30102999 | 0.08289318 |
| chr5 | 37648574 | 37858734 | 210161 | 5  | 2 | 3 | 0.1755501  | 0.30102999 | 2 | 2 | 0.1755501  | 0.08289318 |
| chr5 | 37858734 | 38031882 | 173149 | 1  | 2 | 3 | 0.30102999 | 0.30102999 | 1 | 2 | 0.05404976 | 0.08289318 |
| chr5 | 38031882 | 38367928 | 336047 | 4  | 2 | 3 | 0.30102999 | 0.51676182 | 1 | 1 | 0.05404976 | 0.02438896 |
| chr5 | 38367928 | 38464482 | 96555  | 4  | 2 | 3 | 0.30102999 | 0.30102999 | 1 | 2 | 0.05404976 | 0.08289318 |
| chr5 | 38464482 | 38506683 | 42202  | 1  | 2 | 3 | 0.30102999 | 0.51676182 | 1 | 1 | 0.05404976 | 0.02438896 |
| chr5 | 38506683 | 38506742 | 60     | 1  | 2 | 5 | 0.1755501  | 1.02643191 | 2 | 1 | 0.1755501  | 0.00478973 |
| chr5 | 38506742 | 38530648 | 23907  | 2  | 2 | 4 | 0.1755501  | 0.76005302 | 2 | 1 | 0.1755501  | 0.01091641 |
| chr5 | 38530648 | 38530707 | 60     | 1  | 2 | 4 | 0.08289318 | 0.76005302 | 3 | 1 | 0.30102999 | 0.01091641 |
| chr5 | 38530707 | 38594140 | 63434  | 2  | 1 | 4 | 0.02438896 | 0.76005302 | 3 | 1 | 0.51676182 | 0.01091641 |
| chr5 | 38594140 | 38812557 | 218418 | 2  | 1 | 3 | 0.05404976 | 0.51676182 | 2 | 1 | 0.30102999 | 0.02438896 |
| chr5 | 38812557 | 39153581 | 341025 | 8  | 1 | 2 | 0.05404976 | 0.30102999 | 2 | 1 | 0.30102999 | 0.05404976 |
| chr5 | 39153581 | 39228187 | 74607  | 2  | 1 | 2 | 0.05404976 | 0.61140001 | 2 | 0 | 0.30102999 | 0          |
| chr5 | 39228187 | 39383383 | 155197 | 1  | 1 | 2 | 0.05404976 | 0.30102999 | 2 | 1 | 0.30102999 | 0.05404976 |
| chr5 | 39383383 | 39480926 | 87944  | 4  | 1 | 2 | 0.05404976 | 0.61140001 | 2 | 0 | 0.30102999 | 0          |
| chr5 | 39480926 | 39739415 | 258490 | 1  | 1 | 1 | 0.05404976 | 0.30102999 | 2 | 0 | 0.30102999 | 0          |
| chr5 | 39739415 | 39962973 | 223559 | 2  | 1 | 1 | 0.05404976 | 0.1218695  | 2 | 0 | 0.30102999 | 0.1218695  |
| chr5 | 39962973 | 39963032 | 60     | 1  | 2 | 1 | 0.1755501  | 0.1218695  | 2 | 1 | 0.1755501  | 0.1218695  |
| chr5 | 39963032 | 40227465 | 264434 | 1  | 2 | 0 | 0.1755501  | 0.1218695  | 2 | 1 | 0.1755501  | 0.30102999 |
| chr5 | 40227465 | 40308038 | 80574  | 1  | 2 | 0 | 0.08289318 | 0.1218695  | 2 | 1 | 0.30102999 | 0.30102999 |
| chr5 | 40308038 | 40481922 | 173885 | 2  | 2 | 0 | 0.0429175  | 0.1218695  | 4 | 1 | 0.47744371 | 0.30102999 |
| chr5 | 40481922 | 40632544 | 150623 | 2  | 3 | 1 | 0.10122019 | 0.1218695  | 4 | 1 | 0.30102999 | 0.1218695  |
| chr5 | 40632544 | 40746633 | 114090 | 3  | 1 | 4 | 0.10122019 | 0.05404976 | 4 | 2 | 0.30102999 | 0.30102999 |
| chr5 | 40746633 | 40833824 | 87192  | 4  | 3 | 1 | 0.05670724 | 0.05404976 | 5 | 2 | 0.45545077 | 0.30102999 |
| chr5 | 40833824 | 40928690 | 94867  | 3  | 3 | 1 | 0.10122019 | 0.05404976 | 5 | 2 | 0.30102999 | 0.30102999 |
| chr5 | 40928690 | 40969921 | 41232  | 2  | 2 | 2 | 0.10122019 | 0.1755501  | 4 | 2 | 0.30102999 | 0.1755501  |
| chr5 | 40969921 | 41135465 | 165545 | 5  | 3 | 3 | 0.10122019 | 0.30102999 | 4 | 2 | 0.30102999 | 0.08289318 |
| chr5 | 41135465 | 41213572 | 78108  | 4  | 3 | 4 | 0.10122019 | 0.30102999 | 4 | 3 | 0.30102999 | 0.10122019 |
| chr5 | 41213572 | 41458084 | 244513 | 5  | 3 | 2 | 0.10122019 | 0.08289318 | 4 | 3 | 0.30102999 | 0.30102999 |
| chr5 | 41458084 | 41585063 | 126980 | 4  | 3 | 2 | 0.05670724 | 0.17593012 | 5 | 3 | 0.45545077 | 0.17593012 |
| chr5 | 41585063 | 41730846 | 145784 | 4  | 3 | 2 | 0.05670724 | 0.30102999 | 5 | 2 | 0.45545077 | 0.08289318 |
| chr5 | 41730846 | 41842822 | 111977 | 2  | 3 | 2 | 0.05670724 | 0.1755501  | 5 | 2 | 0.45545077 | 0.1755501  |
| chr5 | 41842822 | 41989920 | 147099 | 5  | 3 | 2 | 0.05670724 | 0.30102999 | 5 | 2 | 0.45545077 | 0.08289318 |
| chr5 | 41989920 | 42088106 | 98187  | 1  | 3 | 2 | 0.10122019 | 0.1755501  | 4 | 2 | 0.30102999 | 0.1755501  |
| chr5 | 42088106 | 42278512 | 190407 | 1  | 2 | 2 | 0.0429175  | 0.30102999 | 4 | 1 | 0.47744371 | 0.05404976 |
| chr5 | 42278512 | 42429800 | 151289 | 1  | 2 | 2 | 0.0429175  | 0.61140001 | 4 | 0 | 0.47744371 | 0          |
| chr5 | 42429800 | 42583800 | 154001 | 4  | 3 | 2 | 0.10122019 | 0.61140001 | 4 | 0 | 0.30102999 | 0          |
| chr5 | 42583800 | 42629208 | 45409  | 2  | 3 | 2 | 0.05670724 | 0.93173516 | 5 | 0 | 0.45545077 | 0          |
| chr5 | 42629208 | 42720939 | 91732  | 2  | 2 | 2 | 0.05670724 | 0.61140001 | 5 | 0 | 0.45545077 | 0          |
| chr5 | 42720939 | 42720998 | 60     | 1  | 3 | 3 | 0.05670724 |            |   |   |            |            |

|      |          |          |        |   |   |    |   |            |   |    |            |            |
|------|----------|----------|--------|---|---|----|---|------------|---|----|------------|------------|
| chr5 | 52699922 | 52699981 | 60     | 1 | 0 | 12 | 0 | 1.17038931 | 3 | 6  | 0.93173516 | 0.00778066 |
| chr5 | 52699981 | 52855758 | 155778 | 2 | 0 | 10 | 0 | 0.74627054 | 2 | 6  | 0.61140001 | 0.02793176 |
| chr5 | 52855758 | 52855817 | 60     | 1 | 0 | 10 | 0 | 0.56314362 | 2 | 7  | 0.61140001 | 0.05232577 |
| chr5 | 52855817 | 52899327 | 43511  | 1 | 0 | 10 | 0 | 0.56314362 | 1 | 7  | 0.30102999 | 0.05232577 |
| chr5 | 52899327 | 52967429 | 68103  | 4 | 1 | 11 | 0 | 0.55623409 | 1 | 8  | 0.30102999 | 0.05490675 |
| chr5 | 52967429 | 53092696 | 125268 | 1 | 0 | 10 | 0 | 0.56314362 | 1 | 7  | 0.30102999 | 0.05232577 |
| chr5 | 53092696 | 53180594 | 87899  | 2 | 0 | 10 | 0 | 0.56314362 | 2 | 7  | 0.61140001 | 0.05232577 |
| chr5 | 53180594 | 53180653 | 60     | 1 | 0 | 12 | 0 | 0.72109894 | 2 | 8  | 0.61140001 | 0.03209037 |
| chr5 | 53180653 | 53322946 | 142294 | 4 | 1 | 11 | 0 | 0.55623409 | 1 | 8  | 0.30102999 | 0.05490675 |
| chr5 | 53322946 | 53470931 | 147986 | 4 | 0 | 11 | 0 | 0.55623409 | 1 | 8  | 0.61140001 | 0.05490675 |
| chr5 | 53470931 | 53470990 | 60     | 1 | 0 | 13 | 0 | 0.91308053 | 2 | 8  | 0.61140001 | 0.01767679 |
| chr5 | 53470990 | 53692422 | 221433 | 3 | 0 | 11 | 0 | 0.55623409 | 2 | 8  | 0.61140001 | 0.05490675 |
| chr5 | 53692422 | 53752188 | 59767  | 3 | 0 | 12 | 0 | 0.72109894 | 2 | 8  | 0.61140001 | 0.03209037 |
| chr5 | 53752188 | 53834035 | 81848  | 1 | 0 | 11 | 0 | 0.55623409 | 2 | 8  | 0.61140001 | 0.05490675 |
| chr5 | 53834035 | 53884916 | 50882  | 1 | 0 | 10 | 0 | 0.4167287  | 2 | 8  | 0.61140001 | 0.08923391 |
| chr5 | 53884916 | 53884975 | 60     | 1 | 0 | 10 | 0 | 0.30102999 | 2 | 9  | 0.61140001 | 0.14135546 |
| chr5 | 53884975 | 54274998 | 390024 | 3 | 0 | 10 | 0 | 0.30102999 | 1 | 9  | 0.30102999 | 0.14135546 |
| chr5 | 54274998 | 54327250 | 52253  | 4 | 0 | 11 | 0 | 0.41444892 | 1 | 9  | 0.30102999 | 0.09154957 |
| chr5 | 54327250 | 54405935 | 78686  | 2 | 0 | 10 | 0 | 0.30102999 | 1 | 9  | 0.30102999 | 0.14135546 |
| chr5 | 54405935 | 54405993 | 59     | 1 | 0 | 11 | 0 | 0.41444892 | 1 | 9  | 0.30102999 | 0.09154957 |
| chr5 | 54405993 | 54422851 | 16859  | 2 | 0 | 11 | 0 | 0.20975986 | 1 | 9  | 0.30102999 | 0.20975986 |
| chr5 | 54422851 | 54453341 | 30491  | 2 | 0 | 9  | 0 | 0.30102999 | 1 | 8  | 0.30102999 | 0.13872638 |
| chr5 | 54453341 | 54528474 | 75134  | 4 | 0 | 9  | 0 | 0.20975986 | 1 | 9  | 0.30102999 | 0.20975986 |
| chr5 | 54528474 | 54600713 | 72240  | 4 | 0 | 10 | 0 | 0.30102999 | 1 | 9  | 0.30102999 | 0.14135546 |
| chr5 | 54600713 | 54662700 | 61988  | 2 | 0 | 9  | 0 | 0.20975986 | 1 | 9  | 0.30102999 | 0.20975986 |
| chr5 | 54662700 | 54763860 | 101161 | 3 | 1 | 8  | 0 | 0.13872638 | 1 | 9  | 0.30102999 | 0.30102999 |
| chr5 | 54763860 | 54813475 | 49616  | 3 | 0 | 10 | 0 | 0.30102999 | 1 | 9  | 0.30102999 | 0.14135546 |
| chr5 | 54813475 | 54867957 | 54483  | 1 | 0 | 9  | 0 | 0.20975986 | 1 | 9  | 0.30102999 | 0.20975986 |
| chr5 | 54867957 | 54868016 | 60     | 1 | 0 | 10 | 0 | 0.30102999 | 1 | 9  | 0.30102999 | 0.14135546 |
| chr5 | 54868016 | 54922296 | 54281  | 1 | 0 | 9  | 0 | 0.20975986 | 1 | 9  | 0.30102999 | 0.20975986 |
| chr5 | 54922296 | 54922355 | 60     | 1 | 0 | 10 | 0 | 0.21118145 | 1 | 10 | 0.30102999 | 0.21118145 |
| chr5 | 54922355 | 54965591 | 43237  | 2 | 0 | 10 | 0 | 0.30102999 | 1 | 9  | 0.30102999 | 0.14135546 |
| chr5 | 54965591 | 55005121 | 39531  | 2 | 0 | 10 | 0 | 0.21118145 | 1 | 10 | 0.30102999 | 0.21118145 |
| chr5 | 55005121 | 55034974 | 29854  | 1 | 0 | 8  | 0 | 0.08923391 | 1 | 10 | 0.30102999 | 0.4167287  |
| chr5 | 55034974 | 55072833 | 37860  | 1 | 0 | 7  | 0 | 0.05232577 | 1 | 10 | 0.30102999 | 0.56314362 |
| chr5 | 55072833 | 55072892 | 60     | 1 | 0 | 8  | 0 | 0.08923391 | 1 | 10 | 0.30102999 | 0.4167287  |
| chr5 | 55072892 | 55150650 | 77759  | 1 | 0 | 7  | 0 | 0.08584816 | 1 | 9  | 0.30102999 | 0.42015402 |
| chr5 | 55150650 | 55155516 | 4867   | 2 | 0 | 8  | 0 | 0.13872638 | 1 | 9  | 0.30102999 | 0.30102999 |
| chr5 | 55155516 | 55178855 | 23340  | 1 | 0 | 7  | 0 | 0.08584816 | 1 | 9  | 0.30102999 | 0.42015402 |
| chr5 | 55178855 | 55178914 | 60     | 1 | 0 | 8  | 0 | 0.13872638 | 1 | 9  | 0.30102999 | 0.30102999 |
| chr5 | 55178914 | 55212864 | 33951  | 1 | 0 | 7  | 0 | 0.08584816 | 1 | 9  | 0.30102999 | 0.42015402 |
| chr5 | 55212864 | 55259296 | 46433  | 3 | 0 | 8  | 0 | 0.08923391 | 1 | 10 | 0.30102999 | 0.4167287  |
| chr5 | 55259296 | 55300294 | 40999  | 1 | 0 | 7  | 0 | 0.08584816 | 1 | 9  | 0.30102999 | 0.42015402 |
| chr5 | 55300294 | 55338255 | 37962  | 2 | 0 | 8  | 0 | 0.13872638 | 1 | 9  | 0.30102999 | 0.30102999 |
| chr5 | 55338255 | 55403185 | 64931  | 2 | 0 | 8  | 0 | 0.13872638 | 1 | 9  | 0.30102999 | 0.30102999 |
| chr5 | 55403185 | 55407375 | 4191   | 1 | 0 | 8  | 0 | 0.20764654 | 1 | 8  | 0.20764654 | 0.20764654 |
| chr5 | 55407375 | 55463797 | 56423  | 1 | 0 | 5  | 0 | 0.07511598 | 1 | 7  | 0.43181735 | 0.43181735 |
| chr5 | 55463797 | 55506966 | 43170  | 1 | 0 | 3  | 0 | 0.01598258 | 1 | 7  | 0.84395715 | 0.84395715 |
| chr5 | 55506966 | 55548789 | 41824  | 2 | 0 | 4  | 0 | 0.03812622 | 1 | 7  | 0.60763643 | 0.60763643 |
| chr5 | 55548789 | 55548848 | 60     | 1 | 0 | 7  | 0 | 0.20469099 | 1 | 7  | 0.20469099 | 0.20469099 |
| chr5 | 55548848 | 55613293 | 64446  | 1 | 0 | 5  | 0 | 0.07511598 | 1 | 7  | 0.43181735 | 0.43181735 |
| chr5 | 55613293 | 55613352 | 60     | 1 | 0 | 6  | 0 | 0.129913   | 1 | 7  | 0.30102999 | 0.30102999 |
| chr5 | 55613352 | 55822480 | 209129 | 2 | 0 | 4  | 0 | 0.03812622 | 1 | 7  | 0.60763643 | 0.60763643 |
| chr5 | 55822480 | 55822539 | 60     | 1 | 0 | 5  | 0 | 0.04407651 | 1 | 8  | 0.58747015 | 0.58747015 |
| chr5 | 55822539 | 55897011 | 74473  | 1 | 0 | 4  | 0 | 0.02074938 | 1 | 8  | 0.79906872 | 0.79906872 |
| chr5 | 55897011 | 56049292 | 152282 | 1 | 0 | 3  | 0 | 0.00796414 | 1 | 8  | 1.07548421 | 1.07548421 |
| chr5 | 56049292 | 56107595 | 58304  | 2 | 0 | 4  | 0 | 0.02074938 | 1 | 8  | 0.79906872 | 0.79906872 |
| chr5 | 56107595 | 56142367 | 34773  | 2 | 0 | 7  | 0 | 0.13499366 | 1 | 8  | 0.30102999 | 0.30102999 |
| chr5 | 56142367 | 56173104 | 30738  | 1 | 0 | 5  | 0 | 0.04407651 | 1 | 8  | 0.58747015 | 0.58747015 |
| chr5 | 56173104 | 56229094 | 55991  | 2 | 0 | 3  | 0 | 0.00796414 | 1 | 8  | 1.07548421 | 1.07548421 |
| chr5 | 56229094 | 56346762 | 117669 | 2 | 0 | 5  | 0 | 0.04407651 | 1 | 8  | 0.58747015 | 0.58747015 |
| chr5 | 56346762 | 56346821 | 60     | 1 | 0 | 9  | 0 | 0.30102999 | 1 | 8  | 0.30102999 | 0.30102999 |
| chr5 | 56346821 | 56380653 | 191245 | 4 | 0 | 8  | 0 | 0.30102999 | 1 | 7  | 0.13499366 | 0.13499366 |
| chr5 | 56380653 | 56560366 | 22302  | 1 | 0 | 8  | 0 | 0.4250187  | 1 | 6  | 0.08122616 | 0.08122616 |
| chr5 | 56560366 | 56560425 | 60     | 1 | 0 | 8  | 0 | 0.30102999 | 1 | 7  | 0.13499366 | 0.13499366 |
| chr5 | 56560425 | 56819300 | 258876 | 2 | 0 | 6  | 0 | 0.30102999 | 1 | 5  | 0.13499366 | 0.13499366 |
| chr5 | 56819300 | 56819359 | 60     | 1 | 0 | 8  | 0 | 0.4250187  | 1 | 6  | 0.08122616 | 0.08122616 |
| chr5 | 56819359 | 56921560 | 102202 | 1 | 0 | 6  | 0 | 0.20064824 | 1 | 6  | 0.20064824 | 0.20064824 |
| chr5 | 56921560 | 56921619 | 60     | 1 | 0 | 6  | 0 | 0.129913   | 1 | 7  | 0.30102999 | 0.30102999 |
| chr5 | 56921619 | 57072959 | 151341 | 1 | 0 | 6  | 0 | 0.20064824 | 1 | 6  | 0.20064824 | 0.20064824 |
| chr5 | 57072959 | 57073018 | 60     | 1 | 0 | 9  | 0 | 0.42015402 | 1 | 7  | 0.08584816 | 0.08584816 |
| chr5 | 57073018 | 57367145 | 294128 | 2 | 0 | 6  | 0 | 0.20064824 | 1 | 6  | 0.20064824 | 0.20064824 |
| chr5 | 57367145 | 57367204 | 60     | 1 | 0 | 8  | 0 | 0.20764654 | 1 | 8  | 0.20764654 | 0.20764654 |
| chr5 | 57367204 | 57439562 | 72359  | 1 | 0 | 8  | 0 | 0.30102999 | 1 | 7  | 0.13499366 | 0.13499366 |
| chr5 | 57439562 | 57439621 | 60     | 1 | 0 | 9  | 0 | 0.30102999 | 1 | 8  | 0.13872638 | 0.13872638 |
| chr5 | 57439621 | 57550782 | 111162 | 1 | 0 | 8  | 0 | 0.30102999 | 1 | 7  | 0.13499366 | 0.13499366 |
| chr5 | 57550782 | 57706809 | 156028 | 2 | 0 | 8  | 0 | 0.20764654 | 1 | 8  | 0.20764654 | 0.20764654 |
| chr5 | 57706809 | 57753040 | 46232  | 2 | 0 | 8  | 0 | 0.08923391 | 1 | 10 | 0.4167287  | 0.4167287  |
| chr5 | 57753040 | 57864290 | 111251 | 2 | 0 | 8  | 0 | 0.13872638 | 1 | 9  | 0.30102999 | 0.30102999 |
| chr5 | 57864290 | 57941456 | 77167  | 1 | 0 | 7  | 0 | 0.08584816 | 1 | 10 | 0.42015402 | 0.42015402 |
| chr5 | 57941456 | 57975607 | 34152  | 2 | 0 | 8  | 0 | 0.08923391 | 1 | 10 | 0.4167287  | 0.4167287  |
| chr5 | 57975607 | 58019626 | 44020  | 2 | 0 | 9  | 0 | 0.09154957 | 1 | 11 | 0.41444892 | 0.41444892 |
| chr5 | 58019626 | 58019685 | 60     | 1 | 0 | 9  | 0 | 0.0565833  | 1 | 12 | 0.55190077 | 0.55190077 |
| chr5 | 58019685 | 58159718 | 140034 | 2 | 0 | 8  | 0 | 0.05490675 | 1 | 11 | 0.55623409 | 0.55623409 |
| chr5 | 58159718 | 58159777 | 60     | 1 | 0 | 9  | 0 | 0.09154957 | 1 | 11 | 0.41444892 | 0.41444892 |
| chr5 | 58159777 | 58267314 | 107538 | 1 | 0 | 9  | 0 | 0.14135546 | 1 | 10 | 0.30102999 | 0.30102999 |
| chr5 | 58267314 | 58295609 | 28296  | 2 | 0 | 9  | 0 | 0.09154957 | 1 | 11 | 0.41444892 | 0.41444892 |
| chr5 | 58295609 | 58438276 | 142668 | 4 | 0 | 9  | 0 | 0.0565833  | 1 | 12 | 0.55190077 | 0.55190077 |
| chr5 | 58438276 | 58480998 | 42723  | 1 | 0 | 9  | 0 | 0.09154957 | 1 | 11 | 0.41444892 | 0.41444892 |
| chr5 | 58480998 | 58512914 | 31917  | 2 | 0 | 10 | 0 | 0.14303407 | 1 | 11 | 0.30102999 | 0.30102999 |
| chr5 | 58512914 | 58885517 | 372604 | 8 | 0 | 10 | 0 | 0.09290028 | 1 | 12 | 0.41314172 | 0.41314172 |
| chr5 | 58885517 | 58962510 | 76994  | 1 | 0 | 9  | 0 | 0.0565833  | 1 | 12 | 0.55190077 | 0.55190077 |
| chr5 | 58962510 | 58962569 | 60     | 1 | 0 | 10 | 0 | 0.09290028 | 1 | 12 | 0.41314172 | 0.41314172 |
| chr5 | 58962569 | 58982671 | 21013  | 1 | 0 | 10 | 0 | 0.14303407 | 1 | 11 | 0.30102999 | 0.30102999 |
| chr5 | 58982671 | 59040702 | 58032  | 2 | 0 | 9  | 0 | 0.09154957 | 1 | 11 | 0.41444892 | 0.41444892 |
| chr5 | 59040702 | 59188595 | 147894 | 3 | 0 | 11 | 0 | 0.21220026 | 1 | 11 | 0.         |            |

|      |          |          |         |   |   |    |   |            |   |    |   |            |
|------|----------|----------|---------|---|---|----|---|------------|---|----|---|------------|
| chr5 | 61709724 | 61807108 | 97385   | 3 | 0 | 9  | 0 | 0.30102999 | 0 | 8  | 0 | 0.13872638 |
| chr5 | 61807108 | 61876775 | 69668   | 2 | 0 | 8  | 0 | 0.20764654 | 0 | 8  | 0 | 0.20764654 |
| chr5 | 61876775 | 61985998 | 109224  | 2 | 0 | 4  | 0 | 0.03812622 | 0 | 7  | 0 | 0.60763643 |
| chr5 | 61985998 | 61986057 | 60      | 1 | 0 | 5  | 0 | 0.07511598 | 0 | 7  | 0 | 0.43181735 |
| chr5 | 61986057 | 62167606 | 181550  | 1 | 0 | 5  | 0 | 0.12309572 | 0 | 6  | 0 | 0.30102999 |
| chr5 | 62167606 | 62167665 | 60      | 1 | 0 | 5  | 0 | 0.07511598 | 0 | 7  | 0 | 0.43181735 |
| chr5 | 62167665 | 62567143 | 399479  | 3 | 0 | 3  | 0 | 0.01598258 | 0 | 7  | 0 | 0.84395715 |
| chr5 | 62567143 | 62763067 | 195925  | 2 | 0 | 7  | 0 | 0.08584816 | 0 | 9  | 0 | 0.42015402 |
| chr5 | 62763067 | 62839696 | 76630   | 2 | 0 | 8  | 0 | 0.13872638 | 0 | 9  | 0 | 0.30102999 |
| chr5 | 62839696 | 62839755 | 60      | 1 | 0 | 9  | 0 | 0.20975986 | 0 | 9  | 0 | 0.20975986 |
| chr5 | 62839755 | 62904604 | 64850   | 1 | 0 | 8  | 0 | 0.20764654 | 0 | 8  | 0 | 0.20764654 |
| chr5 | 62904604 | 63146963 | 242360  | 1 | 0 | 8  | 0 | 0.30102999 | 0 | 7  | 0 | 0.13499366 |
| chr5 | 63146963 | 63147022 | 60      | 1 | 0 | 9  | 0 | 0.14135546 | 0 | 10 | 0 | 0.30102999 |
| chr5 | 63147022 | 63256289 | 109268  | 1 | 0 | 9  | 0 | 0.20975986 | 0 | 9  | 0 | 0.20975986 |
| chr5 | 63256289 | 63462871 | 206583  | 4 | 0 | 9  | 0 | 0.14135546 | 0 | 10 | 0 | 0.30102999 |
| chr5 | 63462871 | 63564788 | 101918  | 4 | 0 | 10 | 0 | 0.09290028 | 0 | 12 | 0 | 0.41314172 |
| chr5 | 63564788 | 63607543 | 42756   | 2 | 0 | 10 | 0 | 0.0574087  | 0 | 13 | 0 | 0.5498098  |
| chr5 | 63607543 | 63607602 | 60      | 1 | 0 | 10 | 0 | 0.03344703 | 0 | 14 | 0 | 0.71353304 |
| chr5 | 63607602 | 63795860 | 188259  | 4 | 0 | 10 | 0 | 0.0574087  | 0 | 13 | 0 | 0.5498098  |
| chr5 | 63795860 | 63908578 | 112719  | 2 | 0 | 10 | 0 | 0.09290028 | 0 | 12 | 0 | 0.41314172 |
| chr5 | 63908578 | 63908637 | 60      | 1 | 0 | 12 | 0 | 0.21227046 | 0 | 12 | 0 | 0.21227046 |
| chr5 | 63908637 | 63976761 | 68125   | 4 | 0 | 11 | 0 | 0.14385241 | 0 | 11 | 0 | 0.30102999 |
| chr5 | 63976761 | 64124088 | 147328  | 4 | 0 | 13 | 0 | 0.21200206 | 0 | 13 | 0 | 0.21200206 |
| chr5 | 64124088 | 64181337 | 57250   | 2 | 0 | 14 | 0 | 0.30102999 | 0 | 13 | 0 | 0.14303407 |
| chr5 | 64181337 | 64267604 | 86268   | 3 | 0 | 15 | 0 | 0.41444892 | 0 | 13 | 0 | 0.09154957 |
| chr5 | 64267604 | 64267652 | 49      | 1 | 0 | 15 | 0 | 0.30102999 | 0 | 14 | 0 | 0.14135546 |
| chr5 | 64267652 | 64402468 | 134817  | 2 | 0 | 14 | 0 | 0.30102999 | 0 | 13 | 0 | 0.14303407 |
| chr5 | 64402468 | 64445253 | 42786   | 3 | 0 | 16 | 0 | 0.55623409 | 0 | 13 | 0 | 0.05490675 |
| chr5 | 64445253 | 64595917 | 150665  | 2 | 0 | 14 | 0 | 0.30102999 | 0 | 13 | 0 | 0.14303407 |
| chr5 | 64595917 | 64595974 | 58      | 1 | 0 | 16 | 0 | 0.55623409 | 0 | 13 | 0 | 0.05490675 |
| chr5 | 64595974 | 64629923 | 33950   | 1 | 0 | 14 | 0 | 0.30102999 | 0 | 13 | 0 | 0.14303407 |
| chr5 | 64629923 | 64883293 | 253371  | 6 | 0 | 12 | 0 | 0.30102999 | 0 | 12 | 0 | 0.14385241 |
| chr5 | 64883293 | 64883352 | 60      | 1 | 0 | 14 | 0 | 0.30102999 | 0 | 13 | 0 | 0.14303407 |
| chr5 | 64883352 | 64958702 | 75351   | 2 | 0 | 13 | 0 | 0.41271556 | 0 | 11 | 0 | 0.09334429 |
| chr5 | 64958702 | 64970883 | 12182   | 3 | 0 | 14 | 0 | 0.41314172 | 0 | 12 | 0 | 0.09290028 |
| chr5 | 64970883 | 65000171 | 29289   | 1 | 0 | 13 | 0 | 0.30102999 | 0 | 12 | 0 | 0.14385241 |
| chr5 | 65000171 | 65271952 | 271782  | 7 | 0 | 12 | 0 | 0.21227046 | 0 | 12 | 0 | 0.21227046 |
| chr5 | 65271952 | 65368029 | 96078   | 4 | 0 | 12 | 0 | 0.09290028 | 0 | 14 | 0 | 0.41314172 |
| chr5 | 65368029 | 65368086 | 58      | 1 | 0 | 12 | 0 | 0.0565833  | 0 | 15 | 0 | 0.55190077 |
| chr5 | 65368086 | 65453958 | 85873   | 2 | 0 | 12 | 0 | 0.14385241 | 0 | 13 | 0 | 0.30102999 |
| chr5 | 65453958 | 65635983 | 182026  | 6 | 0 | 12 | 0 | 0.09290028 | 0 | 14 | 0 | 0.41314172 |
| chr5 | 65635983 | 65756386 | 120404  | 2 | 0 | 12 | 0 | 0.14385241 | 0 | 13 | 0 | 0.30102999 |
| chr5 | 65756386 | 65954504 | 198119  | 4 | 0 | 11 | 0 | 0.09334429 | 0 | 13 | 0 | 0.41271556 |
| chr5 | 65954504 | 66091472 | 136969  | 2 | 0 | 9  | 0 | 0.0565833  | 0 | 12 | 0 | 0.55190077 |
| chr5 | 66091472 | 66223106 | 131635  | 3 | 0 | 9  | 0 | 0.0331093  | 0 | 13 | 0 | 0.71538971 |
| chr5 | 66223106 | 66287220 | 64115   | 2 | 0 | 9  | 0 | 0.09154957 | 0 | 11 | 0 | 0.41444892 |
| chr5 | 66287220 | 66287279 | 60      | 1 | 0 | 9  | 0 | 0.0565833  | 0 | 12 | 0 | 0.55190077 |
| chr5 | 66287279 | 66342718 | 55440   | 1 | 0 | 8  | 0 | 0.03209037 | 0 | 12 | 0 | 0.72109894 |
| chr5 | 66342718 | 66392796 | 50079   | 2 | 0 | 9  | 0 | 0.0565833  | 0 | 12 | 0 | 0.55190077 |
| chr5 | 66392796 | 66449372 | 56577   | 2 | 0 | 9  | 0 | 0.0331093  | 0 | 13 | 0 | 0.71538971 |
| chr5 | 66449372 | 66449431 | 60      | 1 | 0 | 11 | 0 | 0.09334429 | 0 | 13 | 0 | 0.41271556 |
| chr5 | 66449431 | 66492404 | 42974   | 1 | 0 | 9  | 0 | 0.0331093  | 0 | 13 | 0 | 0.71538971 |
| chr5 | 66492404 | 66579723 | 87320   | 1 | 0 | 8  | 0 | 0.01767679 | 0 | 13 | 0 | 0.91308053 |
| chr5 | 66579723 | 66646622 | 66900   | 2 | 0 | 9  | 0 | 0.0331093  | 0 | 13 | 0 | 0.71538971 |
| chr5 | 66646622 | 66773116 | 126495  | 1 | 0 | 7  | 0 | 0.00859896 | 0 | 13 | 0 | 1.14735594 |
| chr5 | 66773116 | 67015853 | 242738  | 2 | 0 | 5  | 0 | 0.00141024 | 0 | 13 | 0 | 1.7506523  |
| chr5 | 67015853 | 67015912 | 60      | 1 | 0 | 6  | 0 | 0.00166733 | 0 | 14 | 0 | 1.70763027 |
| chr5 | 67015912 | 67174998 | 159087  | 1 | 0 | 3  | 0 | 2.93E-04   | 0 | 12 | 0 | 2.24559516 |
| chr5 | 67174998 | 67175057 | 60      | 1 | 0 | 4  | 0 | 0.00108487 | 0 | 12 | 0 | 1.81706455 |
| chr5 | 67175057 | 67320572 | 145516  | 1 | 0 | 2  | 0 | 9.54E-04   | 0 | 9  | 0 | 1.74076927 |
| chr5 | 67320572 | 67444100 | 123529  | 1 | 0 | 2  | 0 | 0.00221948 | 0 | 8  | 0 | 1.44210395 |
| chr5 | 67444100 | 67508101 | 64002   | 1 | 0 | 2  | 0 | 0.00493743 | 0 | 7  | 0 | 1.16581773 |
| chr5 | 67508101 | 67641500 | 133400  | 5 | 0 | 2  | 0 | 0.00221948 | 0 | 8  | 0 | 1.44210395 |
| chr5 | 67641500 | 67641559 | 60      | 1 | 0 | 2  | 0 | 3.90E-04   | 0 | 10 | 0 | 2.0620585  |
| chr5 | 67641559 | 67914183 | 272625  | 1 | 0 | 2  | 0 | 0.00221948 | 0 | 8  | 0 | 1.44210395 |
| chr5 | 67914183 | 68167910 | 253728  | 3 | 0 | 2  | 0 | 9.54E-04   | 0 | 9  | 0 | 1.74076927 |
| chr5 | 68167910 | 68425519 | 257610  | 4 | 0 | 2  | 0 | 0.00221948 | 0 | 8  | 0 | 1.44210395 |
| chr5 | 68425519 | 68520433 | 94915   | 5 | 0 | 2  | 0 | 0.00493743 | 0 | 7  | 0 | 1.16581773 |
| chr5 | 68520433 | 68791331 | 270899  | 1 | 0 | 1  | 0 | 0.02438896 | 0 | 3  | 0 | 0.51676182 |
| chr5 | 68791331 | 70748823 | 1957493 | 1 | 0 | 0  | 0 | 0          | 0 | 2  | 0 | 0.61140001 |
| chr5 | 70748823 | 70895484 | 146662  | 5 | 0 | 5  | 0 | 0.07511598 | 0 | 7  | 0 | 0.43181735 |
| chr5 | 70895484 | 71298356 | 402873  | 7 | 0 | 8  | 0 | 0.13872638 | 0 | 9  | 0 | 0.30102999 |
| chr5 | 71298356 | 71436565 | 138210  | 3 | 0 | 9  | 0 | 0.0565833  | 0 | 12 | 0 | 0.55190077 |
| chr5 | 71436565 | 71460780 | 24216   | 2 | 0 | 13 | 0 | 0.21200206 | 0 | 13 | 0 | 0.21200206 |
| chr5 | 71460780 | 71502802 | 42023   | 1 | 0 | 12 | 0 | 0.14385241 | 0 | 13 | 0 | 0.30102999 |
| chr5 | 71502802 | 71515732 | 12931   | 2 | 0 | 12 | 0 | 0.09290028 | 0 | 14 | 0 | 0.41314172 |
| chr5 | 71515732 | 71699601 | 183870  | 5 | 0 | 10 | 0 | 0.03344703 | 0 | 14 | 0 | 0.71353304 |
| chr5 | 71699601 | 71886668 | 187068  | 4 | 0 | 12 | 0 | 0.09290028 | 0 | 14 | 0 | 0.41314172 |
| chr5 | 71886668 | 71886727 | 60      | 1 | 0 | 13 | 0 | 0.05490675 | 0 | 16 | 0 | 0.55623409 |
| chr5 | 71886727 | 72115386 | 228660  | 2 | 0 | 13 | 0 | 0.14303407 | 0 | 14 | 0 | 0.30102999 |
| chr5 | 72115386 | 72115445 | 60      | 1 | 0 | 15 | 0 | 0.13872638 | 0 | 16 | 0 | 0.30102999 |
| chr5 | 72115445 | 72161456 | 46012   | 1 | 0 | 14 | 0 | 0.14135546 | 0 | 15 | 0 | 0.30102999 |
| chr5 | 72161456 | 72204364 | 42909   | 1 | 0 | 13 | 0 | 0.09154957 | 0 | 15 | 0 | 0.41444892 |
| chr5 | 72204364 | 72204423 | 60      | 1 | 0 | 13 | 0 | 0.05490675 | 0 | 16 | 0 | 0.55623409 |
| chr5 | 72204423 | 72243184 | 38762   | 1 | 0 | 12 | 0 | 0.03209037 | 0 | 16 | 0 | 0.72109894 |
| chr5 | 72243184 | 72288525 | 45342   | 1 | 0 | 12 | 0 | 0.09290028 | 0 | 14 | 0 | 0.41314172 |
| chr5 | 72288525 | 72288584 | 60      | 1 | 0 | 13 | 0 | 0.14303407 | 0 | 14 | 0 | 0.30102999 |
| chr5 | 72288584 | 72337791 | 49208   | 1 | 0 | 12 | 0 | 0.14385241 | 0 | 13 | 0 | 0.30102999 |
| chr5 | 72337791 | 72417501 | 79711   | 3 | 0 | 12 | 0 | 0.09290028 | 0 | 14 | 0 | 0.41314172 |
| chr5 | 72417501 | 72427454 | 9954    | 3 | 0 | 12 | 0 | 0.0565833  | 0 | 15 | 0 | 0.55190077 |
| chr5 | 72427454 | 72470617 | 43164   | 2 | 0 | 11 | 0 | 0.0331093  | 0 | 15 | 0 | 0.71538971 |
| chr5 | 72470617 | 72470676 | 60      | 1 | 0 | 12 | 0 | 0.0565833  | 0 | 15 | 0 | 0.55190077 |
| chr5 | 72470676 | 72527647 | 56972   | 1 | 0 | 11 | 0 | 0.0331093  | 0 | 15 | 0 | 0.71538971 |
| chr5 | 72527647 | 72527706 | 60      | 1 | 0 | 12 | 0 | 0.0565833  | 0 | 15 | 0 | 0.55190077 |
| chr5 | 72527706 | 72606687 | 132982  | 1 | 0 | 11 | 0 | 0.09334429 | 0 | 13 | 0 | 0.41271556 |
| chr5 | 72606687 | 72742476 | 81790   | 2 | 0 | 10 | 0 | 0.0574087  | 0 | 13 | 0 | 0.5498098  |
| chr5 | 72742476 | 72987520 | 245045  | 7 | 0 | 8  | 0 | 0.01767679 | 0 | 13 | 0 | 0.91308053 |
| chr5 | 72987520 | 72987579 | 60      | 1 | 0 | 10 | 0 | 0.0574087  | 0 | 13 | 0 | 0.5498098  |
| chr5 | 72987579 | 73044400 | 56822   | 1 | 0 | 8  | 0 | 0.01767679 | 0 | 13 | 0 | 0.91308053 |
| chr5 | 73044400 | 73084686 | 40287   | 1 | 0 | 8  | 0 | 0.03209037 | 0 | 12 | 0 | 0.72109894 |
| chr5 | 73084686 | 73158692 | 74007   | 2 | 0 | 10 | 0 | 0.09290028 | 0 | 12 | 0 | 0.41314172 |
| chr5 | 73158692 | 73158751 | 60      | 1 | 0 | 10 | 0 | 0.0574087  | 0 | 13 | 0 | 0.5498098  |
| chr5 | 73158751 | 73201951 | 43201   |   |   |    |   |            |   |    |   |            |



|      |          |          |        |   |   |    |   |            |   |    |   |            |
|------|----------|----------|--------|---|---|----|---|------------|---|----|---|------------|
| chr5 | 74510705 | 74632161 | 121457 | 1 | 0 | 12 | 0 | 0.21227046 | 0 | 12 | 0 | 0.21227046 |
| chr5 | 74632161 | 74706843 | 74683  | 5 | 0 | 12 | 0 | 0.14385241 | 0 | 13 | 0 | 0.30102999 |
| chr5 | 74706843 | 74706902 | 60     | 1 | 0 | 14 | 0 | 0.14135546 | 0 | 15 | 0 | 0.30102999 |
| chr5 | 74706902 | 74772552 | 65651  | 1 | 0 | 13 | 0 | 0.14303407 | 0 | 14 | 0 | 0.30102999 |
| chr5 | 74772552 | 74772611 | 60     | 1 | 0 | 13 | 0 | 0.09154957 | 0 | 15 | 0 | 0.41444892 |
| chr5 | 74772611 | 74822073 | 49463  | 1 | 0 | 12 | 0 | 0.0565833  | 0 | 15 | 0 | 0.55190077 |
| chr5 | 74822073 | 74973724 | 151652 | 5 | 0 | 15 | 0 | 0.09154957 | 0 | 15 | 0 | 0.41444892 |
| chr5 | 74973724 | 74973782 | 59     | 1 | 0 | 15 | 0 | 0.13872638 | 0 | 16 | 0 | 0.30102999 |
| chr5 | 74973782 | 75003621 | 29840  | 2 | 0 | 14 | 0 | 0.08923391 | 0 | 16 | 0 | 0.4167287  |
| chr5 | 75003621 | 75003680 | 60     | 1 | 0 | 15 | 0 | 0.13872638 | 0 | 16 | 0 | 0.30102999 |
| chr5 | 75003680 | 75033997 | 30318  | 1 | 0 | 14 | 0 | 0.14135546 | 0 | 15 | 0 | 0.30102999 |
| chr5 | 75033997 | 75141221 | 107225 | 2 | 0 | 15 | 0 | 0.20975986 | 0 | 15 | 0 | 0.20975986 |
| chr5 | 75141221 | 75141280 | 60     | 1 | 0 | 15 | 0 | 0.13872638 | 0 | 16 | 0 | 0.30102999 |
| chr5 | 75141280 | 75271248 | 129969 | 1 | 0 | 14 | 0 | 0.08923391 | 0 | 16 | 0 | 0.4167287  |
| chr5 | 75271248 | 75389702 | 118455 | 1 | 0 | 14 | 0 | 0.14135546 | 0 | 15 | 0 | 0.30102999 |
| chr5 | 75389702 | 75389761 | 60     | 1 | 0 | 15 | 0 | 0.13872638 | 0 | 16 | 0 | 0.30102999 |
| chr5 | 75389761 | 75494672 | 104912 | 2 | 0 | 14 | 0 | 0.14135546 | 0 | 15 | 0 | 0.30102999 |
| chr5 | 75494672 | 75626399 | 131728 | 2 | 0 | 12 | 0 | 0.09290028 | 0 | 14 | 0 | 0.41314172 |
| chr5 | 75626399 | 75626458 | 60     | 1 | 0 | 14 | 0 | 0.21118145 | 0 | 14 | 0 | 0.21118145 |
| chr5 | 75626458 | 75720002 | 93545  | 2 | 0 | 10 | 0 | 0.0574087  | 0 | 13 | 0 | 0.5498098  |
| chr5 | 75720002 | 75757453 | 37454  | 2 | 0 | 11 | 0 | 0.0574087  | 0 | 14 | 0 | 0.5498098  |
| chr5 | 75757453 | 75788687 | 31233  | 2 | 0 | 13 | 0 | 0.09154957 | 0 | 15 | 0 | 0.41444892 |
| chr5 | 75788687 | 75788746 | 60     | 1 | 0 | 14 | 0 | 0.14135546 | 0 | 15 | 0 | 0.30102999 |
| chr5 | 75788746 | 75852895 | 64150  | 1 | 0 | 14 | 0 | 0.21118145 | 0 | 14 | 0 | 0.21118145 |
| chr5 | 75852895 | 75911769 | 58875  | 1 | 0 | 12 | 0 | 0.09290028 | 0 | 14 | 0 | 0.41314172 |
| chr5 | 75911769 | 75946977 | 35209  | 4 | 0 | 12 | 0 | 0.0565833  | 0 | 15 | 0 | 0.55190077 |
| chr5 | 75946977 | 76003175 | 56199  | 1 | 0 | 10 | 0 | 0.01817691 | 0 | 15 | 0 | 0.90719478 |
| chr5 | 76003175 | 76169880 | 166706 | 5 | 0 | 10 | 0 | 0.0574087  | 0 | 13 | 0 | 0.5498098  |
| chr5 | 76169880 | 76329022 | 159143 | 6 | 0 | 10 | 0 | 0.03344703 | 0 | 14 | 0 | 0.71353304 |
| chr5 | 76329022 | 76504233 | 175212 | 4 | 0 | 10 | 0 | 0.01817691 | 0 | 15 | 0 | 0.90719478 |
| chr5 | 76504233 | 76525095 | 20863  | 2 | 0 | 13 | 0 | 0.09154957 | 0 | 15 | 0 | 0.41444892 |
| chr5 | 76525095 | 76525154 | 60     | 1 | 0 | 14 | 0 | 0.14135546 | 0 | 15 | 0 | 0.30102999 |
| chr5 | 76525154 | 76605107 | 79954  | 2 | 0 | 13 | 0 | 0.09154957 | 0 | 15 | 0 | 0.41444892 |
| chr5 | 76605107 | 76651897 | 46791  | 2 | 0 | 14 | 0 | 0.08923391 | 0 | 16 | 0 | 0.4167287  |
| chr5 | 76651897 | 76651956 | 60     | 1 | 0 | 15 | 0 | 0.13872638 | 0 | 16 | 0 | 0.30102999 |
| chr5 | 76651956 | 76706606 | 54651  | 2 | 0 | 14 | 0 | 0.08923391 | 0 | 16 | 0 | 0.4167287  |
| chr5 | 76706606 | 76748249 | 41644  | 2 | 0 | 13 | 0 | 0.05490675 | 0 | 16 | 0 | 0.55623409 |
| chr5 | 76748249 | 76784414 | 36166  | 2 | 0 | 13 | 0 | 0.14303407 | 0 | 14 | 0 | 0.30102999 |
| chr5 | 76784414 | 77021060 | 236647 | 4 | 0 | 13 | 0 | 0.21200206 | 0 | 13 | 0 | 0.21200206 |
| chr5 | 77021060 | 77072493 | 51434  | 2 | 0 | 13 | 0 | 0.14303407 | 0 | 14 | 0 | 0.30102999 |
| chr5 | 77072493 | 77072542 | 50     | 1 | 0 | 14 | 0 | 0.21118145 | 0 | 14 | 0 | 0.21118145 |
| chr5 | 77072542 | 77523319 | 450778 | 8 | 0 | 14 | 0 | 0.30102999 | 0 | 13 | 0 | 0.14303407 |
| chr5 | 77523319 | 77635231 | 111913 | 3 | 0 | 15 | 0 | 0.41444892 | 0 | 13 | 0 | 0.09154957 |
| chr5 | 77635231 | 77658239 | 23009  | 2 | 0 | 15 | 0 | 0.30102999 | 0 | 14 | 0 | 0.14135546 |
| chr5 | 77658239 | 77684699 | 26461  | 2 | 0 | 16 | 0 | 0.20764654 | 0 | 16 | 0 | 0.20764654 |
| chr5 | 77684699 | 77715374 | 30676  | 1 | 0 | 15 | 0 | 0.20975986 | 0 | 15 | 0 | 0.20975986 |
| chr5 | 77715374 | 77755098 | 39725  | 1 | 0 | 14 | 0 | 0.21118145 | 0 | 14 | 0 | 0.21118145 |
| chr5 | 77755098 | 77866678 | 31581  | 1 | 0 | 13 | 0 | 0.21200206 | 0 | 13 | 0 | 0.21200206 |
| chr5 | 77866678 | 7786737  | 60     | 1 | 0 | 13 | 0 | 0.14303407 | 0 | 14 | 0 | 0.30102999 |
| chr5 | 7786737  | 77833478 | 46742  | 2 | 0 | 13 | 0 | 0.30102999 | 0 | 12 | 0 | 0.14385241 |
| chr5 | 77833478 | 77833537 | 60     | 1 | 0 | 13 | 0 | 0.14303407 | 0 | 14 | 0 | 0.30102999 |
| chr5 | 77833537 | 77900667 | 67131  | 2 | 0 | 12 | 0 | 0.21227046 | 0 | 12 | 0 | 0.21227046 |
| chr5 | 77900667 | 77900726 | 60     | 1 | 0 | 12 | 0 | 0.09290028 | 0 | 14 | 0 | 0.41314172 |
| chr5 | 77900726 | 77977430 | 76705  | 1 | 0 | 12 | 0 | 0.21227046 | 0 | 12 | 0 | 0.21227046 |
| chr5 | 77977430 | 78075795 | 98366  | 1 | 0 | 11 | 0 | 0.30102999 | 0 | 10 | 0 | 0.14303407 |
| chr5 | 78075795 | 78111599 | 35805  | 2 | 0 | 11 | 0 | 0.21200206 | 0 | 11 | 0 | 0.21200206 |
| chr5 | 78111599 | 78199103 | 87505  | 3 | 0 | 12 | 0 | 0.09290028 | 0 | 14 | 0 | 0.41314172 |
| chr5 | 78199103 | 78234294 | 35192  | 2 | 0 | 12 | 0 | 0.21118145 | 0 | 14 | 0 | 0.21118145 |
| chr5 | 78234294 | 78280105 | 45812  | 1 | 0 | 13 | 0 | 0.21200206 | 0 | 13 | 0 | 0.21200206 |
| chr5 | 78280105 | 78317194 | 37090  | 1 | 0 | 13 | 0 | 0.41271556 | 0 | 11 | 0 | 0.09334429 |
| chr5 | 78317194 | 78368121 | 50928  | 1 | 0 | 13 | 0 | 0.5498098  | 0 | 10 | 0 | 0.0574087  |
| chr5 | 78368121 | 78411563 | 43443  | 3 | 0 | 10 | 0 | 0.5498098  | 0 | 11 | 0 | 0.0574087  |
| chr5 | 78411563 | 78411617 | 55     | 1 | 0 | 14 | 0 | 0.30102999 | 0 | 13 | 0 | 0.14303407 |
| chr5 | 78411617 | 78559013 | 147397 | 3 | 0 | 11 | 0 | 0.09334429 | 0 | 13 | 0 | 0.41271556 |
| chr5 | 78559013 | 78617472 | 58460  | 2 | 0 | 10 | 0 | 0.0574087  | 0 | 13 | 0 | 0.5498098  |
| chr5 | 78617472 | 78617531 | 60     | 1 | 0 | 12 | 0 | 0.0565833  | 0 | 15 | 0 | 0.55190077 |
| chr5 | 78617531 | 78671747 | 54217  | 1 | 0 | 11 | 0 | 0.09334429 | 0 | 13 | 0 | 0.41271556 |
| chr5 | 78671747 | 78671806 | 60     | 1 | 0 | 11 | 0 | 0.0574087  | 0 | 14 | 0 | 0.5498098  |
| chr5 | 78671806 | 78693347 | 21542  | 1 | 0 | 9  | 0 | 0.01817691 | 0 | 14 | 0 | 0.90719478 |
| chr5 | 78693347 | 78789518 | 96172  | 4 | 0 | 10 | 0 | 0.03344703 | 0 | 14 | 0 | 0.71353304 |
| chr5 | 78789518 | 78831700 | 42183  | 2 | 0 | 14 | 0 | 0.08923391 | 0 | 16 | 0 | 0.4167287  |
| chr5 | 78831700 | 78973533 | 141834 | 4 | 0 | 11 | 0 | 0.0574087  | 0 | 14 | 0 | 0.5498098  |
| chr5 | 78973533 | 78973592 | 60     | 1 | 0 | 14 | 0 | 0.14135546 | 0 | 15 | 0 | 0.30102999 |
| chr5 | 78973592 | 79034055 | 60464  | 1 | 0 | 12 | 0 | 0.09290028 | 0 | 14 | 0 | 0.41314172 |
| chr5 | 79034055 | 79034114 | 60     | 1 | 0 | 14 | 0 | 0.21118145 | 0 | 14 | 0 | 0.21118145 |
| chr5 | 79034114 | 79084822 | 50709  | 2 | 0 | 12 | 0 | 0.09290028 | 0 | 14 | 0 | 0.41314172 |
| chr5 | 79084822 | 79084879 | 58     | 1 | 0 | 13 | 0 | 0.14303407 | 0 | 14 | 0 | 0.30102999 |
| chr5 | 79084879 | 79254138 | 169260 | 2 | 0 | 11 | 0 | 0.09334429 | 0 | 13 | 0 | 0.41271556 |
| chr5 | 79254138 | 79336096 | 81959  | 2 | 0 | 10 | 0 | 0.14303407 | 0 | 11 | 0 | 0.30102999 |
| chr5 | 79336096 | 79411777 | 75682  | 2 | 0 | 8  | 0 | 0.05490675 | 0 | 11 | 0 | 0.55623409 |
| chr5 | 79411777 | 79507683 | 95907  | 3 | 0 | 9  | 0 | 0.09154957 | 0 | 11 | 0 | 0.41444892 |
| chr5 | 79507683 | 79539194 | 31512  | 2 | 0 | 9  | 0 | 0.0565833  | 0 | 12 | 0 | 0.55190077 |
| chr5 | 79539194 | 79539253 | 60     | 1 | 0 | 11 | 0 | 0.09334429 | 0 | 13 | 0 | 0.41271556 |
| chr5 | 79539253 | 79578155 | 38903  | 2 | 0 | 10 | 0 | 0.0574087  | 0 | 13 | 0 | 0.5498098  |
| chr5 | 79578155 | 79616014 | 37860  | 1 | 0 | 10 | 0 | 0.03344703 | 0 | 14 | 0 | 0.71353304 |
| chr5 | 79616014 | 79678634 | 62621  | 1 | 0 | 10 | 0 | 0.0574087  | 0 | 13 | 0 | 0.5498098  |
| chr5 | 79678634 | 79736096 | 57463  | 1 | 0 | 9  | 0 | 0.0331093  | 0 | 13 | 0 | 0.71538971 |
| chr5 | 79736096 | 79775071 | 38976  | 3 | 0 | 9  | 0 | 0.01817691 | 0 | 14 | 0 | 0.90719478 |
| chr5 | 79775071 | 79844193 | 69123  | 3 | 0 | 10 | 0 | 0.01817691 | 0 | 15 | 0 | 0.90719478 |
| chr5 | 79844193 | 79844252 | 60     | 1 | 0 | 11 | 0 | 0.0331093  | 0 | 15 | 0 | 0.71538971 |
| chr5 | 79844252 | 79933552 | 89301  | 1 | 0 | 10 | 0 | 0.01817691 | 0 | 15 | 0 | 0.90719478 |
| chr5 | 79933552 | 79951089 | 17538  | 2 | 0 | 11 | 0 | 0.0331093  | 0 | 15 | 0 | 0.71538971 |
| chr5 | 79951089 | 80021305 | 70217  | 2 | 0 | 10 | 0 | 0.05490675 | 0 | 16 | 0 | 0.55623409 |
| chr5 | 80021305 | 80021364 | 60     | 1 | 0 | 14 | 0 | 0.08923391 | 0 | 16 | 0 | 0.4167287  |
| chr5 | 80021364 | 80057447 | 36084  | 1 | 0 | 12 | 0 | 0.03209037 | 0 | 16 | 0 | 0.72109894 |
| chr5 | 80057447 | 80169014 | 111568 | 2 | 0 | 11 | 0 | 0.0331093  | 0 | 15 | 0 | 0.71538971 |
| chr5 | 80169014 | 80254203 | 85190  | 1 | 0 | 10 | 0 | 0.01817691 | 0 | 15 | 0 | 0.90719478 |
| chr5 | 80254203 | 80366805 | 112603 | 2 | 0 | 8  | 0 | 0.00433294 | 0 | 15 | 0 | 1.3873209  |
| chr5 | 80366805 | 80366864 | 60     | 1 | 0 | 10 | 0 | 0.01817691 | 0 | 15 | 0 | 0.90719478 |
| chr5 | 80366864 | 80469317 | 102454 | 2 | 0 | 9  | 0 | 0.00926608 | 0 | 15 | 0 | 1.13004284 |
| chr5 | 80469317 | 80469376 | 60     | 1 | 0 | 10 | 0 | 0.01817691 | 0 | 15 | 0 | 0.90719478 |
| chr5 | 80469376 | 80608340 | 138965 | 4 | 0 | 10 | 0 | 0.03344703 | 0 | 14 | 0 | 0.71353304 |
|      |          |          |        |   |   |    |   |            |   |    |   |            |

|      |          |          |        |    |   |    |            |            |   |    |   |            |
|------|----------|----------|--------|----|---|----|------------|------------|---|----|---|------------|
| chr5 | 81997374 | 82088238 | 90865  | 2  | 0 | 10 | 0          | 0.09290028 | 0 | 12 | 0 | 0.41314172 |
| chr5 | 82088238 | 82088297 | 60     | 1  | 0 | 13 | 0          | 0.09154957 | 0 | 15 | 0 | 0.41444892 |
| chr5 | 82088297 | 82317796 | 229500 | 1  | 0 | 13 | 0          | 0.14303407 | 0 | 14 | 0 | 0.30102999 |
| chr5 | 82317796 | 82317855 | 60     | 1  | 0 | 14 | 0          | 0.21118145 | 0 | 14 | 0 | 0.21118145 |
| chr5 | 82317855 | 82360571 | 42717  | 1  | 0 | 14 | 0          | 0.30102999 | 0 | 13 | 0 | 0.14303407 |
| chr5 | 82360571 | 82367584 | 7014   | 2  | 0 | 14 | 0          | 0.21118145 | 0 | 14 | 0 | 0.21118145 |
| chr5 | 82367584 | 82472836 | 105253 | 3  | 0 | 14 | 0          | 0.14135546 | 0 | 15 | 0 | 0.30102999 |
| chr5 | 82472836 | 82506382 | 33547  | 2  | 0 | 15 | 0          | 0.20975986 | 0 | 15 | 0 | 0.20975986 |
| chr5 | 82506382 | 82506441 | 60     | 1  | 0 | 17 | 0          | 0.42015402 | 0 | 15 | 0 | 0.08584816 |
| chr5 | 82506441 | 82600225 | 93785  | 3  | 0 | 17 | 0          | 0.56314362 | 0 | 14 | 0 | 0.05232577 |
| chr5 | 82600225 | 82648926 | 48702  | 1  | 0 | 15 | 0          | 0.30102999 | 0 | 14 | 0 | 0.14135546 |
| chr5 | 82648926 | 82648985 | 60     | 1  | 0 | 16 | 0          | 0.4167287  | 0 | 14 | 0 | 0.08923391 |
| chr5 | 82648985 | 82744321 | 95337  | 1  | 0 | 16 | 0          | 0.55623409 | 0 | 13 | 0 | 0.05490675 |
| chr5 | 82744321 | 82779349 | 35029  | 1  | 0 | 15 | 0          | 0.41444892 | 0 | 13 | 0 | 0.09154957 |
| chr5 | 82779349 | 82835213 | 55865  | 3  | 0 | 15 | 0          | 0.30102999 | 0 | 14 | 0 | 0.14135546 |
| chr5 | 82835213 | 82995331 | 160119 | 5  | 0 | 14 | 0          | 0.41444892 | 0 | 13 | 0 | 0.09154957 |
| chr5 | 82995331 | 83244757 | 249427 | 4  | 0 | 15 | 0          | 0.30102999 | 0 | 13 | 0 | 0.14303407 |
| chr5 | 83244757 | 83356252 | 111496 | 2  | 0 | 15 | 0          | 0.21200206 | 0 | 13 | 0 | 0.21200206 |
| chr5 | 83356252 | 83356309 | 58     | 1  | 0 | 15 | 0          | 0.30102999 | 0 | 14 | 0 | 0.14135546 |
| chr5 | 83356309 | 83481832 | 125524 | 3  | 0 | 12 | 0          | 0.14385241 | 0 | 13 | 0 | 0.30102999 |
| chr5 | 83481832 | 83481891 | 60     | 1  | 0 | 13 | 0          | 0.21200206 | 0 | 13 | 0 | 0.21200206 |
| chr5 | 83481891 | 83561183 | 79293  | 1  | 0 | 12 | 0          | 0.14385241 | 0 | 13 | 0 | 0.30102999 |
| chr5 | 83561183 | 83638398 | 77216  | 2  | 0 | 8  | 0          | 0.05490675 | 0 | 11 | 0 | 0.5623409  |
| chr5 | 83638398 | 83638457 | 60     | 1  | 0 | 13 | 0          | 0.21200206 | 0 | 13 | 0 | 0.21200206 |
| chr5 | 83638457 | 83769645 | 131189 | 2  | 0 | 8  | 0          | 0.03209037 | 0 | 12 | 0 | 0.72109894 |
| chr5 | 83769645 | 83924954 | 155310 | 1  | 0 | 7  | 0          | 0.03037338 | 0 | 11 | 0 | 0.73110763 |
| chr5 | 83924954 | 83925013 | 60     | 1  | 0 | 10 | 0          | 0.14303407 | 0 | 11 | 0 | 0.30102999 |
| chr5 | 83925013 | 84194538 | 269526 | 1  | 0 | 6  | 0          | 0.20064824 | 0 | 6  | 0 | 0.20064824 |
| chr5 | 84194538 | 84299608 | 105071 | 2  | 0 | 7  | 0          | 0.30102999 | 0 | 6  | 0 | 0.129913   |
| chr5 | 84299608 | 84349709 | 50102  | 2  | 0 | 8  | 0          | 0.4250187  | 0 | 6  | 0 | 0.08122616 |
| chr5 | 84349709 | 84819841 | 164735 | 3  | 0 | 3  | 0          | 0.51676182 | 0 | 1  | 0 | 0.02438896 |
| chr5 | 84819841 | 84984575 | 60     | 1  | 0 | 11 | 0          | 0.41444892 | 0 | 9  | 0 | 0.09154957 |
| chr5 | 84984575 | 84984634 | 60     | 1  | 0 | 10 | 0          | 0.30102999 | 0 | 9  | 0 | 0.14135546 |
| chr5 | 84984634 | 85199271 | 214638 | 1  | 0 | 12 | 0          | 0.55190377 | 0 | 9  | 0 | 0.0565833  |
| chr5 | 85199271 | 85199330 | 60     | 1  | 0 | 11 | 0          | 0.41444892 | 0 | 9  | 0 | 0.09154957 |
| chr5 | 85199330 | 85381873 | 182544 | 1  | 0 | 11 | 0          | 0.30102999 | 0 | 10 | 0 | 0.14303407 |
| chr5 | 85381873 | 85381932 | 60     | 1  | 0 | 10 | 0          | 0.30102999 | 0 | 9  | 0 | 0.14135546 |
| chr5 | 85381932 | 85624656 | 242725 | 2  | 0 | 10 | 0          | 0.30102999 | 0 | 10 | 0 | 0.14303407 |
| chr5 | 85624656 | 85712443 | 87788  | 2  | 0 | 14 | 0          | 0.21118145 | 0 | 14 | 0 | 0.21118145 |
| chr5 | 85712443 | 85712502 | 60     | 1  | 0 | 13 | 0          | 0.21200206 | 0 | 13 | 0 | 0.21200206 |
| chr5 | 85712502 | 85954487 | 241986 | 2  | 0 | 13 | 0          | 0.30102999 | 0 | 12 | 0 | 0.14385241 |
| chr5 | 85954487 | 86254118 | 299632 | 2  | 0 | 14 | 0          | 0.30102999 | 0 | 13 | 0 | 0.14303407 |
| chr5 | 86254118 | 86377115 | 122998 | 2  | 0 | 13 | 0          | 0.21200206 | 0 | 13 | 0 | 0.21200206 |
| chr5 | 86377115 | 86487774 | 110660 | 1  | 0 | 10 | 0          | 0.09290028 | 0 | 12 | 0 | 0.41314172 |
| chr5 | 86487774 | 86519499 | 31726  | 1  | 0 | 11 | 0          | 0.14385241 | 0 | 12 | 0 | 0.30102999 |
| chr5 | 86519499 | 86523177 | 3679   | 2  | 0 | 9  | 0          | 0.055833   | 0 | 12 | 0 | 0.55190377 |
| chr5 | 86523177 | 86682676 | 159500 | 4  | 0 | 8  | 0          | 0.05490675 | 0 | 11 | 0 | 0.5623409  |
| chr5 | 86682676 | 86718879 | 36204  | 3  | 0 | 9  | 0          | 0.09154957 | 0 | 11 | 0 | 0.41444892 |
| chr5 | 86718879 | 86904001 | 185123 | 4  | 0 | 9  | 0          | 0.0565833  | 0 | 12 | 0 | 0.55190377 |
| chr5 | 86904001 | 86904060 | 60     | 1  | 0 | 7  | 0          | 0.03037338 | 0 | 11 | 0 | 0.73110763 |
| chr5 | 86904060 | 87050542 | 146483 | 1  | 0 | 7  | 0          | 0.1667721  | 0 | 12 | 0 | 0.92532268 |
| chr5 | 87050542 | 87249953 | 199412 | 2  | 0 | 12 | 0          | 0.09290028 | 0 | 14 | 0 | 0.41314172 |
| chr5 | 87249953 | 87250012 | 60     | 1  | 0 | 10 | 0          | 0.0574087  | 0 | 13 | 0 | 0.5498098  |
| chr5 | 87250012 | 87615824 | 365813 | 4  | 0 | 9  | 0          | 0.031093   | 0 | 13 | 0 | 0.71538971 |
| chr5 | 87615824 | 87686865 | 71042  | 1  | 0 | 10 | 0          | 0.0574087  | 0 | 13 | 0 | 0.5498098  |
| chr5 | 87686865 | 87734527 | 47604  | 1  | 0 | 5  | 0          | 0.00666883 | 0 | 11 | 0 | 1.20557689 |
| chr5 | 87734527 | 87928008 | 193482 | 1  | 0 | 4  | 0          | 0.00247414 | 0 | 11 | 0 | 1.52371709 |
| chr5 | 87928008 | 88016273 | 88266  | 4  | 0 | 4  | 0          | 0.00108487 | 0 | 12 | 0 | 1.81706455 |
| chr5 | 88016273 | 88078676 | 62404  | 1  | 0 | 4  | 0          | 0.00247414 | 0 | 11 | 0 | 1.52371709 |
| chr5 | 88078676 | 88232646 | 153971 | 5  | 0 | 5  | 0          | 0.04407651 | 0 | 8  | 0 | 0.58747015 |
| chr5 | 88232646 | 88348206 | 115561 | 1  | 0 | 4  | 0          | 0.02074938 | 0 | 8  | 0 | 0.79906872 |
| chr5 | 88348206 | 88450293 | 102088 | 1  | 0 | 4  | 0          | 0.01077081 | 0 | 9  | 0 | 1.01542894 |
| chr5 | 88450293 | 88593277 | 142985 | 2  | 0 | 9  | 0          | 0.14135546 | 0 | 10 | 0 | 0.30102999 |
| chr5 | 88593277 | 88593336 | 60     | 1  | 0 | 3  | 0          | 0.0033594  | 0 | 9  | 0 | 0.33111237 |
| chr5 | 88593336 | 88660218 | 266883 | 2  | 0 | 8  | 0          | 0.08923391 | 0 | 10 | 0 | 0.4167287  |
| chr5 | 88660218 | 88660277 | 60     | 1  | 0 | 8  | 0          | 0.30102999 | 0 | 7  | 0 | 0.13499366 |
| chr5 | 88660277 | 89028093 | 167817 | 1  | 0 | 6  | 0          | 0.129913   | 0 | 7  | 0 | 0.30102999 |
| chr5 | 89028093 | 89253207 | 225115 | 1  | 0 | 7  | 0          | 0.13499366 | 0 | 8  | 0 | 0.30102999 |
| chr5 | 89253207 | 89253266 | 60     | 1  | 0 | 6  | 0          | 0.129913   | 0 | 7  | 0 | 0.30102999 |
| chr5 | 89253266 | 89500084 | 246819 | 2  | 0 | 5  | 0          | 0.12309572 | 0 | 6  | 0 | 0.30102999 |
| chr5 | 89500084 | 89689882 | 189799 | 1  | 0 | 5  | 0          | 0.07511598 | 0 | 7  | 0 | 0.43181735 |
| chr5 | 89689882 | 89734050 | 44169  | 3  | 0 | 7  | 0          | 0.13499366 | 0 | 8  | 0 | 0.30102999 |
| chr5 | 89734050 | 89734109 | 60     | 1  | 0 | 7  | 0          | 0.20469099 | 0 | 7  | 0 | 0.20469099 |
| chr5 | 89734109 | 90077119 | 343011 | 10 | 0 | 5  | 0          | 0.07511598 | 0 | 7  | 0 | 0.43181735 |
| chr5 | 90077119 | 90281252 | 204134 | 5  | 0 | 7  | 0          | 0.13499366 | 0 | 8  | 0 | 0.30102999 |
| chr5 | 90281252 | 90321595 | 40344  | 2  | 0 | 7  | 0          | 0.20469099 | 0 | 7  | 0 | 0.20469099 |
| chr5 | 90321595 | 90460776 | 139182 | 4  | 0 | 4  | 0          | 0.18734596 | 0 | 4  | 0 | 0.18734596 |
| chr5 | 90460776 | 90677117 | 216342 | 3  | 0 | 2  | 0          | 0.30102999 | 0 | 2  | 0 | 0.1575501  |
| chr5 | 90677117 | 90752413 | 75297  | 2  | 0 | 4  | 0          | 0.1575501  | 0 | 2  | 0 | 0.1575501  |
| chr5 | 90752413 | 90904045 | 151633 | 1  | 0 | 4  | 0          | 0.18734596 | 0 | 4  | 0 | 0.18734596 |
| chr5 | 90904045 | 90904104 | 60     | 1  | 0 | 0  | 0          | 0          | 0 | 3  | 0 | 0.93173516 |
| chr5 | 90904104 | 91086399 | 182296 | 1  | 0 | 0  | 0          | 0          | 0 | 4  | 0 | 1.26272838 |
| chr5 | 91086399 | 91086458 | 60     | 1  | 0 | 0  | 0          | 0          | 0 | 2  | 0 | 0.61140001 |
| chr5 | 91086458 | 91327086 | 240629 | 1  | 0 | 1  | 0          | 0.05404976 | 0 | 2  | 0 | 0.30102999 |
| chr5 | 91327086 | 91327145 | 60     | 1  | 0 | 0  | 0          | 0          | 0 | 1  | 0 | 0.30102999 |
| chr5 | 91327145 | 91542432 | 215288 | 2  | 0 | 0  | 0          | 0          | 0 | 2  | 0 | 0.61140001 |
| chr5 | 91542432 | 91542491 | 60     | 1  | 0 | 0  | 0          | 0          | 0 | 1  | 0 | 0.30102999 |
| chr5 | 91542491 | 91705071 | 162581 | 1  | 0 | 0  | 0          | 0          | 0 | 2  | 0 | 0.30102999 |
| chr5 | 91705071 | 91705130 | 60     | 1  | 0 | 1  | 0          | 0.05404976 | 0 | 2  | 0 | 0.30102999 |
| chr5 | 91705130 | 91981946 | 276817 | 3  | 0 | 1  | 0          | 0.30102999 | 0 | 0  | 0 | 0          |
| chr5 | 91981946 | 91982005 | 60     | 1  | 1 | 6  | 0.30102999 | 1.31360226 | 1 | 0  | 0 | 0.00204627 |
| chr5 | 91982005 | 92105563 | 123559 | 1  | 0 | 6  | 0          | 1.31360226 | 0 | 1  | 0 | 0.00204627 |
| chr5 | 92105563 | 92235441 | 129879 | 2  | 0 | 2  | 0          | 1.16581773 | 0 | 2  | 0 | 0.00493743 |
| chr5 | 92235441 | 92316026 | 80586  | 2  | 0 | 8  | 0          | 1.07548421 | 0 | 3  | 0 | 0.0079614  |
| chr5 | 92316026 | 92316085 | 60     | 1  | 0 | 8  | 0          | 0.20764654 | 0 | 8  | 0 | 0.20764654 |
| chr5 | 92316085 | 92528810 | 212726 | 1  | 0 | 7  | 0          | 0.20469099 | 0 | 7  | 0 | 0.20469099 |
| chr5 | 92528810 | 92661284 | 132475 | 2  | 0 | 8  | 0          | 0.30102999 | 0 | 7  | 0 | 0.13499366 |
| chr5 | 92661284 | 92661343 | 60     | 1  | 0 | 13 | 0          | 0.5498098  | 0 | 9  | 0 | 0.0574087  |
| chr5 | 92661343 | 92740716 | 79374  | 1  | 0 | 12 | 0          | 0.55190377 | 0 | 9  | 0 | 0.0565833  |
| chr5 | 92740716 | 92740775 | 60     | 1  | 0 | 13 | 0          | 0.5498098  | 0 | 9  | 0 | 0.0574087  |
| chr5 | 92740775 | 92806839 | 66065  | 1  | 0 | 13 | 0          | 0.71538971 | 0 | 9  | 0 | 0.031093   |
| chr5 | 92806839 | 92856328 | 49490  | 2  | 0 | 14 | 0          | 0.90719478 | 0 | 9  | 0 | 0.01817691 |
| chr5 | 92856328 | 92922775 | 66448  | 1  | 0 | 13 | 0          | 0.71538971 | 0 | 9  | 0 | 0.031093   |
| chr5 | 92922775 |          |        |    |   |    |            |            |   |    |   |            |

|      |           |           |        |   |   |    |   |            |   |    |   |            |
|------|-----------|-----------|--------|---|---|----|---|------------|---|----|---|------------|
| chr5 | 94288903  | 94288962  | 60     | 1 | 0 | 14 | 0 | 0.5498098  | 0 | 11 | 0 | 0.0574087  |
| chr5 | 94288962  | 94316727  | 2776   | 1 | 0 | 13 | 0 | 0.41271556 | 0 | 11 | 0 | 0.09334429 |
| chr5 | 94316727  | 94373819  | 57093  | 1 | 0 | 10 | 0 | 0.30102999 | 0 | 11 | 0 | 0.14385241 |
| chr5 | 94373819  | 94478206  | 104388 | 2 | 0 | 10 | 0 | 0.21118145 | 0 | 10 | 0 | 0.21118145 |
| chr5 | 94478206  | 94528574  | 50369  | 2 | 0 | 11 | 0 | 0.21200206 | 0 | 11 | 0 | 0.21200206 |
| chr5 | 94528574  | 94528633  | 60     | 1 | 0 | 11 | 0 | 0.14385241 | 0 | 12 | 0 | 0.30102999 |
| chr5 | 94528633  | 94683232  | 154600 | 3 | 0 | 10 | 0 | 0.09290028 | 0 | 12 | 0 | 0.41314172 |
| chr5 | 94683232  | 94683291  | 60     | 1 | 0 | 11 | 0 | 0.14385241 | 0 | 12 | 0 | 0.30102999 |
| chr5 | 94683291  | 94800050  | 116760 | 2 | 0 | 9  | 0 | 0.09154957 | 0 | 11 | 0 | 0.41444892 |
| chr5 | 94800050  | 94856474  | 56425  | 2 | 0 | 9  | 0 | 0.0331093  | 0 | 12 | 0 | 0.71538971 |
| chr5 | 94856474  | 94927175  | 70702  | 2 | 0 | 9  | 0 | 0.0565833  | 0 | 13 | 0 | 0.55190077 |
| chr5 | 94927175  | 95072617  | 145443 | 3 | 0 | 8  | 0 | 0.08923291 | 0 | 10 | 0 | 0.4167287  |
| chr5 | 95072617  | 95152468  | 79852  | 3 | 0 | 9  | 0 | 0.14135546 | 0 | 10 | 0 | 0.30102999 |
| chr5 | 95152468  | 95188548  | 36081  | 2 | 0 | 9  | 0 | 0.09154957 | 0 | 11 | 0 | 0.41444892 |
| chr5 | 95188548  | 95188603  | 56     | 1 | 0 | 11 | 0 | 0.14385241 | 0 | 12 | 0 | 0.30102999 |
| chr5 | 95188603  | 95275711  | 87109  | 2 | 0 | 11 | 0 | 0.21200206 | 0 | 11 | 0 | 0.21200206 |
| chr5 | 95275711  | 95275770  | 60     | 1 | 0 | 11 | 0 | 0.14385241 | 0 | 12 | 0 | 0.30102999 |
| chr5 | 95275770  | 95353621  | 77852  | 2 | 0 | 10 | 0 | 0.21118145 | 0 | 10 | 0 | 0.21118145 |
| chr5 | 95353621  | 95353680  | 60     | 1 | 0 | 11 | 0 | 0.14385241 | 0 | 12 | 0 | 0.30102999 |
| chr5 | 95353680  | 95469240  | 115561 | 3 | 0 | 10 | 0 | 0.14303407 | 0 | 11 | 0 | 0.30102999 |
| chr5 | 95469240  | 95580933  | 111694 | 1 | 0 | 10 | 0 | 0.21118145 | 0 | 10 | 0 | 0.21118145 |
| chr5 | 95580933  | 95655412  | 74480  | 2 | 0 | 12 | 0 | 0.21272046 | 0 | 12 | 0 | 0.21272046 |
| chr5 | 95655412  | 95821236  | 165825 | 2 | 0 | 9  | 0 | 0.20975986 | 0 | 9  | 0 | 0.20975986 |
| chr5 | 95821236  | 96031510  | 210275 | 2 | 0 | 8  | 0 | 0.13872638 | 0 | 9  | 0 | 0.30102999 |
| chr5 | 96031510  | 96110300  | 78791  | 3 | 0 | 9  | 0 | 0.14135546 | 0 | 10 | 0 | 0.30102999 |
| chr5 | 96110300  | 96181765  | 71466  | 2 | 0 | 7  | 0 | 0.13499366 | 0 | 8  | 0 | 0.30102999 |
| chr5 | 96181765  | 96212200  | 30436  | 1 | 0 | 7  | 0 | 0.30102999 | 0 | 6  | 0 | 0.129913   |
| chr5 | 96212200  | 96212257  | 58     | 1 | 0 | 8  | 0 | 0.4250187  | 0 | 6  | 0 | 0.08122616 |
| chr5 | 96212257  | 96273324  | 61068  | 3 | 0 | 7  | 0 | 0.43181735 | 0 | 5  | 0 | 0.07511598 |
| chr5 | 96273324  | 96339119  | 65796  | 1 | 0 | 7  | 0 | 0.60763643 | 0 | 4  | 0 | 0.03812622 |
| chr5 | 96339119  | 96339178  | 60     | 1 | 0 | 8  | 0 | 0.79906872 | 0 | 4  | 0 | 0.02074938 |
| chr5 | 96339178  | 96427846  | 88669  | 2 | 0 | 7  | 0 | 1.16581773 | 0 | 2  | 0 | 0.00493743 |
| chr5 | 96427846  | 96577967  | 150122 | 5 | 0 | 5  | 0 | 0.68214471 | 0 | 2  | 0 | 0.02162467 |
| chr5 | 96577967  | 96578026  | 60     | 1 | 0 | 7  | 0 | 1.16581773 | 0 | 2  | 0 | 0.00493743 |
| chr5 | 96578026  | 96762669  | 184644 | 2 | 0 | 6  | 0 | 0.91219088 | 0 | 2  | 0 | 0.01053319 |
| chr5 | 96762669  | 96762728  | 60     | 1 | 0 | 7  | 0 | 1.16581773 | 0 | 2  | 0 | 0.00493743 |
| chr5 | 96762728  | 96899081  | 136354 | 1 | 0 | 6  | 0 | 0.91219088 | 0 | 2  | 0 | 0.01053319 |
| chr5 | 96899081  | 96899140  | 60     | 1 | 0 | 7  | 0 | 1.16581773 | 0 | 2  | 0 | 0.00493743 |
| chr5 | 96899140  | 97051910  | 152771 | 1 | 0 | 6  | 0 | 0.91219088 | 0 | 2  | 0 | 0.01053319 |
| chr5 | 97051910  | 97051969  | 60     | 1 | 0 | 7  | 0 | 1.16581773 | 0 | 2  | 0 | 0.00493743 |
| chr5 | 97051969  | 97310976  | 259008 | 2 | 0 | 6  | 0 | 0.91219088 | 0 | 2  | 0 | 0.01053319 |
| chr5 | 97310976  | 97311035  | 60     | 1 | 0 | 9  | 0 | 1.33111237 | 0 | 3  | 0 | 0.00378107 |
| chr5 | 97311035  | 97555591  | 244557 | 1 | 0 | 9  | 0 | 1.74076927 | 0 | 2  | 0 | 9.54E-04   |
| chr5 | 97555591  | 97663374  | 107784 | 2 | 0 | 9  | 0 | 0.5732208  | 0 | 6  | 0 | 0.04875589 |
| chr5 | 97663374  | 97663433  | 60     | 1 | 0 | 14 | 0 | 1.70763027 | 0 | 6  | 0 | 0.00166733 |
| chr5 | 97663433  | 97705034  | 41602  | 1 | 0 | 9  | 0 | 1.01542894 | 0 | 4  | 0 | 0.01077081 |
| chr5 | 97705034  | 97790274  | 85241  | 2 | 0 | 8  | 0 | 0.79906872 | 0 | 4  | 0 | 0.02074938 |
| chr5 | 97790274  | 97968817  | 178544 | 1 | 0 | 9  | 0 | 1.01542894 | 0 | 4  | 0 | 0.01077081 |
| chr5 | 97968817  | 97968876  | 60     | 1 | 0 | 10 | 0 | 1.2568129  | 0 | 4  | 0 | 0.00530919 |
| chr5 | 97968876  | 98191915  | 223040 | 3 | 0 | 9  | 0 | 1.01542894 | 0 | 4  | 0 | 0.01077081 |
| chr5 | 98191915  | 98217825  | 25911  | 2 | 0 | 12 | 0 | 1.17038931 | 0 | 6  | 0 | 0.00778066 |
| chr5 | 98217825  | 98390918  | 173094 | 2 | 0 | 12 | 0 | 1.81706455 | 0 | 4  | 0 | 0.00108487 |
| chr5 | 98390918  | 98390977  | 60     | 1 | 0 | 12 | 0 | 0.92532268 | 0 | 7  | 0 | 0.01667721 |
| chr5 | 98390977  | 98584007  | 193031 | 1 | 0 | 11 | 0 | 0.9449689  | 0 | 6  | 0 | 0.01518174 |
| chr5 | 98584007  | 98584066  | 60     | 1 | 0 | 13 | 0 | 1.42397267 | 0 | 6  | 0 | 0.00373523 |
| chr5 | 98584066  | 98775350  | 191285 | 1 | 0 | 13 | 0 | 1.7506523  | 0 | 5  | 0 | 0.00141024 |
| chr5 | 98775350  | 98775409  | 60     | 1 | 0 | 13 | 0 | 0.71538971 | 0 | 9  | 0 | 0.0331093  |
| chr5 | 98775409  | 99011063  | 235655 | 1 | 0 | 13 | 0 | 0.91308053 | 0 | 8  | 0 | 0.01767679 |
| chr5 | 99011063  | 99011122  | 60     | 1 | 0 | 15 | 0 | 0.41444892 | 0 | 13 | 0 | 0.09154957 |
| chr5 | 99011122  | 99272936  | 261815 | 1 | 0 | 15 | 0 | 0.55190077 | 0 | 12 | 0 | 0.0565833  |
| chr5 | 99272936  | 99458486  | 185551 | 2 | 0 | 14 | 0 | 0.5498098  | 0 | 11 | 0 | 0.0574087  |
| chr5 | 99458486  | 99458545  | 60     | 1 | 0 | 16 | 0 | 0.55623409 | 0 | 13 | 0 | 0.05690675 |
| chr5 | 99458545  | 99784028  | 325484 | 3 | 0 | 15 | 0 | 0.55190077 | 0 | 12 | 0 | 0.0565833  |
| chr5 | 99784028  | 99874854  | 90827  | 1 | 0 | 10 | 0 | 0.56314362 | 0 | 7  | 0 | 0.05232577 |
| chr5 | 99874854  | 100001989 | 127136 | 2 | 0 | 10 | 0 | 0.42015402 | 0 | 7  | 0 | 0.08894816 |
| chr5 | 100001989 | 100002048 | 60     | 1 | 0 | 15 | 0 | 0.90719478 | 0 | 10 | 0 | 0.01817691 |
| chr5 | 100002048 | 100160174 | 158127 | 3 | 0 | 9  | 0 | 0.5732208  | 0 | 6  | 0 | 0.04875589 |
| chr5 | 100160174 | 100302977 | 142804 | 2 | 0 | 15 | 0 | 0.90719478 | 0 | 10 | 0 | 0.01817691 |
| chr5 | 100302977 | 100303036 | 60     | 1 | 0 | 16 | 0 | 0.91308053 | 0 | 11 | 0 | 0.01767679 |
| chr5 | 100303036 | 100508209 | 205174 | 3 | 0 | 8  | 0 | 0.20764654 | 0 | 8  | 0 | 0.20764654 |
| chr5 | 100508209 | 100508268 | 60     | 1 | 0 | 8  | 0 | 0.13872638 | 0 | 9  | 0 | 0.30102999 |
| chr5 | 100508268 | 100650791 | 142524 | 1 | 0 | 7  | 0 | 0.08584816 | 0 | 9  | 0 | 0.42015402 |
| chr5 | 100650791 | 100814258 | 163468 | 2 | 0 | 8  | 0 | 0.05496675 | 0 | 11 | 0 | 0.55623409 |
| chr5 | 100814258 | 100908297 | 94040  | 2 | 0 | 11 | 0 | 0.14385241 | 0 | 12 | 0 | 0.30102999 |
| chr5 | 100908297 | 100996616 | 88320  | 1 | 0 | 9  | 0 | 0.0565833  | 0 | 12 | 0 | 0.55190077 |
| chr5 | 100996616 | 101148949 | 152334 | 1 | 0 | 6  | 0 | 0.08122616 | 0 | 8  | 0 | 0.4250187  |
| chr5 | 101148949 | 101572563 | 423615 | 3 | 0 | 6  | 0 | 0.44141547 | 0 | 4  | 0 | 0.06713722 |
| chr5 | 101572563 | 101583133 | 10571  | 2 | 0 | 7  | 0 | 0.30102999 | 0 | 6  | 0 | 0.129913   |
| chr5 | 101583133 | 101627144 | 44012  | 1 | 0 | 7  | 0 | 0.43181735 | 0 | 5  | 0 | 0.07511598 |
| chr5 | 101627144 | 101729935 | 102792 | 3 | 0 | 9  | 0 | 0.30102999 | 0 | 8  | 0 | 0.13872638 |
| chr5 | 101729935 | 101832497 | 102563 | 3 | 0 | 9  | 0 | 0.42015402 | 0 | 7  | 0 | 0.08584816 |
| chr5 | 101832497 | 101834242 | 1746   | 2 | 0 | 12 | 0 | 0.41314172 | 0 | 10 | 0 | 0.09290028 |
| chr5 | 101834242 | 102183237 | 348996 | 2 | 0 | 12 | 0 | 0.55190077 | 0 | 9  | 0 | 0.0565833  |
| chr5 | 102183237 | 102526581 | 343345 | 9 | 0 | 11 | 0 | 0.55623409 | 0 | 8  | 0 | 0.05496675 |
| chr5 | 102526581 | 102594041 | 67461  | 1 | 0 | 11 | 0 | 0.73110763 | 0 | 7  | 0 | 0.03037338 |
| chr5 | 102594041 | 102612576 | 18536  | 1 | 0 | 11 | 0 | 0.9449689  | 0 | 6  | 0 | 0.01518174 |
| chr5 | 102612576 | 102732128 | 119553 | 1 | 0 | 9  | 0 | 1.01542894 | 0 | 4  | 0 | 0.01077081 |
| chr5 | 102732128 | 102732187 | 60     | 1 | 0 | 9  | 0 | 0.7680664  | 0 | 5  | 0 | 0.02473314 |
| chr5 | 102732187 | 103185751 | 453565 | 4 | 0 | 7  | 0 | 0.60763643 | 0 | 4  | 0 | 0.03812622 |
| chr5 | 103185751 | 103185810 | 60     | 1 | 0 | 11 | 0 | 0.73110763 | 0 | 7  | 0 | 0.03037338 |
| chr5 | 103185810 | 103409776 | 223967 | 1 | 0 | 10 | 0 | 0.74627054 | 0 | 6  | 0 | 0.02793176 |
| chr5 | 103409776 | 103409835 | 60     | 1 | 0 | 11 | 0 | 0.9449689  | 0 | 6  | 0 | 0.01518174 |
| chr5 | 103409835 | 103566362 | 165528 | 1 | 0 | 10 | 0 | 1.2568129  | 0 | 4  | 0 | 0.00530919 |
| chr5 | 103566362 | 103566421 | 60     | 1 | 0 | 11 | 0 | 1.52371709 | 0 | 4  | 0 | 0.00247414 |
| chr5 | 103566421 | 103618818 | 52398  | 1 | 0 | 10 | 0 | 2.0620585  | 0 | 2  | 0 | 3.90E-04   |
| chr5 | 103618818 | 103770041 | 151224 | 1 | 0 | 9  | 0 | 1.74076927 | 0 | 2  | 0 | 9.54E-04   |
| chr5 | 103770041 | 103770100 | 60     | 1 | 0 | 9  | 0 | 1.01542894 | 0 | 4  | 0 | 0.01077081 |
| chr5 | 103770100 | 103924672 | 154573 | 1 | 0 | 8  | 0 | 1.44210395 | 0 | 2  | 0 | 0.00221948 |
| chr5 | 103924672 | 103924731 | 60     | 1 | 0 | 8  | 0 | 1.07548421 | 0 | 3  | 0 | 0.0079614  |
| chr5 | 103924731 | 104118070 | 193340 | 2 | 0 | 2  | 0 | 0.61140001 | 0 | 2  | 0 | 0          |
| chr5 | 104118070 | 104118129 | 60     | 1 | 0 | 7  | 0 | 0.60763643 | 0 | 4  | 0 | 0.03812622 |
| chr5 | 104118129 | 104246304 | 128176 | 1 | 0 | 4  | 0 | 0.18734596 | 0 | 4  | 0 | 0.18734596 |
| chr5 | 104246304 | 104246363 | 6      |   |   |    |   |            |   |    |   |            |

|      |           |           |        |   |   |    |            |            |   |    |   |            |
|------|-----------|-----------|--------|---|---|----|------------|------------|---|----|---|------------|
| chr5 | 107461547 | 107461606 | 60     | 1 | 0 | 6  | 0          | 0.08122616 | 0 | 8  | 0 | 0.4250187  |
| chr5 | 107461606 | 107644164 | 182559 | 3 | 0 | 6  | 0          | 0.129913   | 0 | 7  | 0 | 0.30102999 |
| chr5 | 107644164 | 107644223 | 60     | 1 | 0 | 7  | 0          | 0.13499366 | 0 | 8  | 0 | 0.30102999 |
| chr5 | 107644223 | 107787100 | 142878 | 2 | 0 | 7  | 0          | 0.20469099 | 0 | 7  | 0 | 0.20469099 |
| chr5 | 107787100 | 107787159 | 60     | 1 | 0 | 8  | 0          | 0.30102999 | 0 | 7  | 0 | 0.13499366 |
| chr5 | 107787159 | 107966441 | 179283 | 1 | 0 | 6  | 0          | 0.129913   | 0 | 7  | 0 | 0.30102999 |
| chr5 | 107966441 | 107966500 | 60     | 1 | 0 | 7  | 0          | 0.13499366 | 0 | 8  | 0 | 0.30102999 |
| chr5 | 107966500 | 108083526 | 117027 | 1 | 0 | 7  | 0          | 0.20469099 | 0 | 7  | 0 | 0.20469099 |
| chr5 | 108083526 | 108083585 | 60     | 1 | 1 | 8  | 0.30102999 | 0.30102999 | 0 | 7  | 0 | 0.13499366 |
| chr5 | 108083585 | 108135211 | 51627  | 1 | 1 | 8  | 0.30102999 | 0.58747015 | 0 | 5  | 0 | 0.04407651 |
| chr5 | 108135211 | 108175612 | 40402  | 1 | 1 | 7  | 0.30102999 | 0.43181735 | 0 | 5  | 0 | 0.07511598 |
| chr5 | 108175612 | 108175671 | 60     | 1 | 1 | 8  | 0.30102999 | 0.20764654 | 0 | 8  | 0 | 0.20764654 |
| chr5 | 108175671 | 108281818 | 106148 | 2 | 1 | 8  | 0.30102999 | 0.4250187  | 0 | 6  | 0 | 0.08122616 |
| chr5 | 108281818 | 108317680 | 35863  | 2 | 1 | 10 | 0.30102999 | 0.56314362 | 0 | 7  | 0 | 0.05232577 |
| chr5 | 108317680 | 108363286 | 45607  | 1 | 1 | 8  | 0.30102999 | 0.4250187  | 0 | 6  | 0 | 0.08122616 |
| chr5 | 108363286 | 108396682 | 33397  | 1 | 1 | 8  | 0.30102999 | 0.58747015 | 0 | 5  | 0 | 0.04407651 |
| chr5 | 108396682 | 108493634 | 96953  | 3 | 1 | 8  | 0.30102999 | 0.4250187  | 0 | 6  | 0 | 0.08122616 |
| chr5 | 108493634 | 108493693 | 60     | 1 | 1 | 10 | 0.30102999 | 0.56314362 | 0 | 7  | 0 | 0.05232577 |
| chr5 | 108493693 | 108523238 | 29546  | 1 | 1 | 10 | 0          | 0.56314362 | 0 | 7  | 0 | 0.05232577 |
| chr5 | 108523238 | 108553767 | 130530 | 2 | 0 | 9  | 0          | 0.5732208  | 0 | 6  | 0 | 0.04875589 |
| chr5 | 108553767 | 108553825 | 60     | 1 | 0 | 9  | 0          | 0.42015402 | 0 | 7  | 0 | 0.08584816 |
| chr5 | 108553825 | 108730382 | 76557  | 2 | 0 | 9  | 0          | 0.5732208  | 0 | 6  | 0 | 0.04875589 |
| chr5 | 108730382 | 108905068 | 174687 | 2 | 0 | 6  | 0          | 0.2064824  | 0 | 6  | 0 | 0.2064824  |
| chr5 | 108905068 | 108978641 | 73574  | 2 | 1 | 6  | 0.30102999 | 0.129913   | 0 | 7  | 0 | 0.30102999 |
| chr5 | 108978641 | 109072537 | 93897  | 2 | 1 | 7  | 0.30102999 | 0.20469099 | 0 | 7  | 0 | 0.20469099 |
| chr5 | 109072537 | 109153155 | 80619  | 3 | 1 | 7  | 0.30102999 | 0.13499366 | 0 | 8  | 0 | 0.30102999 |
| chr5 | 109153155 | 109181554 | 28400  | 1 | 1 | 6  | 0.30102999 | 0.08122616 | 0 | 8  | 0 | 0.4250187  |
| chr5 | 109181554 | 109181613 | 60     | 1 | 1 | 7  | 0.30102999 | 0.13499366 | 0 | 8  | 0 | 0.30102999 |
| chr5 | 109181613 | 109272288 | 90676  | 1 | 1 | 7  | 0.30102999 | 0.20469099 | 0 | 7  | 0 | 0.20469099 |
| chr5 | 109272288 | 109516665 | 244378 | 1 | 0 | 6  | 0          | 0.129913   | 0 | 7  | 0 | 0.30102999 |
| chr5 | 109516665 | 109516724 | 60     | 1 | 0 | 7  | 0          | 0.05232577 | 0 | 7  | 0 | 0.56314362 |
| chr5 | 109516724 | 109692030 | 175307 | 1 | 0 | 7  | 0          | 0.08584816 | 0 | 9  | 0 | 0.42015402 |
| chr5 | 109692030 | 109813485 | 121456 | 3 | 1 | 7  | 0.30102999 | 0.03037338 | 0 | 11 | 0 | 0.73110763 |
| chr5 | 109813485 | 109851548 | 38064  | 1 | 1 | 6  | 0.30102999 | 0.02793176 | 0 | 10 | 0 | 0.74627054 |
| chr5 | 109851548 | 109863434 | 11887  | 2 | 2 | 6  | 0.61140001 | 0.02793176 | 0 | 10 | 0 | 0.74627054 |
| chr5 | 109863434 | 109925123 | 61690  | 1 | 1 | 6  | 0.30102999 | 0.02793176 | 0 | 10 | 0 | 0.74627054 |
| chr5 | 109925123 | 110023143 | 98021  | 2 | 0 | 6  | 0          | 0.02793176 | 0 | 10 | 0 | 0.74627054 |
| chr5 | 110023143 | 110077753 | 54611  | 2 | 1 | 6  | 0.30102999 | 0.02793176 | 0 | 10 | 0 | 0.74627054 |
| chr5 | 110077753 | 110077812 | 60     | 1 | 1 | 6  | 0.30102999 | 0.01518174 | 0 | 11 | 0 | 0.9449689  |
| chr5 | 110077812 | 110153967 | 76156  | 2 | 1 | 6  | 0.30102999 | 0.02793176 | 0 | 10 | 0 | 0.74627054 |
| chr5 | 110153967 | 110525673 | 371707 | 6 | 1 | 6  | 0.30102999 | 0.01518174 | 0 | 11 | 0 | 0.9449689  |
| chr5 | 110525673 | 110570434 | 44762  | 1 | 0 | 6  | 0          | 0.01518174 | 0 | 11 | 0 | 0.9449689  |
| chr5 | 110570434 | 110644342 | 73909  | 3 | 0 | 7  | 0          | 0.01667721 | 0 | 12 | 0 | 0.92532268 |
| chr5 | 110644342 | 110644401 | 60     | 1 | 1 | 8  | 0.30102999 | 0.03209037 | 0 | 12 | 0 | 0.72109894 |
| chr5 | 110644401 | 110782376 | 137976 | 2 | 0 | 8  | 0          | 0.03209037 | 0 | 12 | 0 | 0.72109894 |
| chr5 | 110782376 | 111008513 | 226138 | 5 | 0 | 11 | 0          | 0.09334429 | 0 | 13 | 0 | 0.41271556 |
| chr5 | 111008513 | 111008572 | 60     | 1 | 0 | 12 | 0          | 0.14385241 | 0 | 13 | 0 | 0.30102999 |
| chr5 | 111008572 | 111084651 | 76080  | 1 | 0 | 11 | 0          | 0.09334429 | 0 | 13 | 0 | 0.41271556 |
| chr5 | 111084651 | 111084710 | 60     | 1 | 0 | 12 | 0          | 0.09290028 | 0 | 14 | 0 | 0.41314172 |
| chr5 | 111084710 | 111194538 | 109829 | 1 | 0 | 11 | 0          | 0.0574087  | 0 | 14 | 0 | 0.5498098  |
| chr5 | 111194538 | 111528822 | 334285 | 6 | 0 | 10 | 0          | 0.03344703 | 0 | 14 | 0 | 0.71353304 |
| chr5 | 111528822 | 111528881 | 60     | 1 | 0 | 11 | 0          | 0.0574087  | 0 | 14 | 0 | 0.5498098  |
| chr5 | 111528881 | 111549545 | 20665  | 1 | 0 | 10 | 0          | 0.03344703 | 0 | 14 | 0 | 0.71353304 |
| chr5 | 111549545 | 111599291 | 49747  | 1 | 0 | 9  | 0          | 0.01817691 | 0 | 14 | 0 | 0.90719478 |
| chr5 | 111599291 | 111599350 | 60     | 1 | 0 | 10 | 0          | 0.03344703 | 0 | 14 | 0 | 0.71353304 |
| chr5 | 111599350 | 111678466 | 79117  | 2 | 0 | 10 | 0          | 0.0574087  | 0 | 13 | 0 | 0.5498098  |
| chr5 | 111678466 | 111756788 | 78323  | 4 | 0 | 10 | 0          | 0.01817691 | 0 | 15 | 0 | 0.90719478 |
| chr5 | 111756788 | 112026277 | 269490 | 2 | 0 | 8  | 0          | 0.00909834 | 0 | 14 | 0 | 1.13428373 |
| chr5 | 112026277 | 112065690 | 39414  | 2 | 0 | 9  | 0          | 0.00926608 | 0 | 15 | 0 | 1.13004284 |
| chr5 | 112065690 | 112159202 | 93513  | 5 | 0 | 8  | 0          | 0.00433294 | 0 | 15 | 0 | 1.3873209  |
| chr5 | 112159202 | 112361367 | 202166 | 7 | 1 | 8  | 0.30102999 | 0.00433294 | 0 | 15 | 0 | 1.3873209  |
| chr5 | 112361367 | 112487104 | 125738 | 3 | 0 | 8  | 0          | 0.00433294 | 0 | 15 | 0 | 1.3873209  |
| chr5 | 112487104 | 11235189  | 48086  | 1 | 0 | 6  | 0          | 0.00166733 | 0 | 14 | 0 | 1.70763027 |
| chr5 | 11235189  | 112630129 | 94941  | 2 | 0 | 6  | 0          | 0.00778066 | 0 | 12 | 0 | 1.17038931 |
| chr5 | 112630129 | 112630176 | 48     | 1 | 0 | 6  | 0          | 0.00166733 | 0 | 14 | 0 | 1.70763027 |
| chr5 | 112630176 | 112689256 | 59081  | 1 | 0 | 6  | 0          | 0.00778066 | 0 | 12 | 0 | 1.17038931 |
| chr5 | 112689256 | 112768686 | 79431  | 2 | 0 | 6  | 0          | 0.01518174 | 0 | 11 | 0 | 0.9449689  |
| chr5 | 112768686 | 112828983 | 60298  | 2 | 1 | 6  | 0.30102999 | 0.01518174 | 0 | 11 | 0 | 0.9449689  |
| chr5 | 112828983 | 112839976 | 54994  | 2 | 1 | 7  | 0.30102999 | 0.00859896 | 0 | 13 | 0 | 1.14735594 |
| chr5 | 112839976 | 112884035 | 60     | 1 | 1 | 8  | 0.30102999 | 0.01767679 | 0 | 13 | 0 | 0.91308053 |
| chr5 | 112884035 | 112929668 | 45634  | 1 | 0 | 6  | 0.30102999 | 0.00375523 | 0 | 13 | 0 | 1.42397267 |
| chr5 | 112929668 | 112975695 | 46028  | 2 | 1 | 7  | 0.30102999 | 0.00859896 | 0 | 13 | 0 | 1.14735594 |
| chr5 | 112975695 | 113144517 | 168823 | 1 | 1 | 5  | 0.30102999 | 0.01320236 | 0 | 10 | 0 | 0.97390707 |
| chr5 | 113144517 | 113353747 | 209231 | 1 | 1 | 5  | 0.30102999 | 0.07511598 | 0 | 7  | 0 | 0.43181735 |
| chr5 | 113353747 | 113560958 | 207212 | 2 | 1 | 6  | 0.30102999 | 0.129913   | 0 | 7  | 0 | 0.30102999 |
| chr5 | 113560958 | 113561017 | 60     | 1 | 1 | 8  | 0.30102999 | 0.05490675 | 0 | 11 | 0 | 0.55623409 |
| chr5 | 113561017 | 113602530 | 41514  | 1 | 0 | 7  | 0.30102999 | 0.03037338 | 0 | 11 | 0 | 0.73110763 |
| chr5 | 113602530 | 113602589 | 60     | 1 | 1 | 8  | 0.30102999 | 0.01767679 | 0 | 13 | 0 | 0.91308053 |
| chr5 | 113602589 | 113700181 | 97593  | 1 | 1 | 8  | 0.30102999 | 0.03209037 | 0 | 12 | 0 | 0.72109894 |
| chr5 | 113700181 | 113719832 | 19652  | 2 | 1 | 9  | 0.30102999 | 0.0565833  | 0 | 12 | 0 | 0.55190077 |
| chr5 | 113719832 | 113798839 | 79008  | 2 | 1 | 7  | 0.30102999 | 0.08584816 | 0 | 9  | 0 | 0.42015402 |
| chr5 | 113798839 | 113798898 | 60     | 1 | 1 | 8  | 0.30102999 | 0.08923391 | 0 | 10 | 0 | 0.4167287  |
| chr5 | 113798898 | 113831998 | 33101  | 1 | 0 | 8  | 0          | 0.08923391 | 0 | 10 | 0 | 0.4167287  |
| chr5 | 113831998 | 113832057 | 60     | 1 | 0 | 8  | 0          | 0.05490675 | 0 | 11 | 0 | 0.55623409 |
| chr5 | 113832057 | 113872800 | 40744  | 1 | 0 | 7  | 0          | 0.05232577 | 0 | 10 | 0 | 0.56314362 |
| chr5 | 113872800 | 113872859 | 60     | 1 | 0 | 7  | 0          | 0.03037338 | 0 | 11 | 0 | 0.73110763 |
| chr5 | 113872859 | 113996482 | 123624 | 1 | 0 | 7  | 0          | 0.05232577 | 0 | 10 | 0 | 0.56314362 |
| chr5 | 113996482 | 113996541 | 60     | 1 | 0 | 14 | 0          | 0.30102999 | 0 | 13 | 0 | 0.14303407 |
| chr5 | 113996541 | 114065392 | 68852  | 1 | 0 | 13 | 0          | 0.30102999 | 0 | 12 | 0 | 0.14385241 |
| chr5 | 114065392 | 114158839 | 93448  | 1 | 0 | 13 | 0          | 0.41271556 | 0 | 11 | 0 | 0.09334429 |
| chr5 | 114158839 | 114158898 | 60     | 1 | 0 | 13 | 0          | 0.30102999 | 0 | 12 | 0 | 0.14385241 |
| chr5 | 114158898 | 114392528 | 233631 | 1 | 0 | 11 | 0          | 0.30102999 | 0 | 10 | 0 | 0.14303407 |
| chr5 | 114392528 | 114462055 | 69528  | 2 | 1 | 11 | 0.30102999 | 0.21200206 | 0 | 11 | 0 | 0.21200206 |
| chr5 | 114462055 | 114518075 | 56021  | 3 | 1 | 14 | 0.30102999 | 0.5498098  | 0 | 11 | 0 | 0.0574087  |
| chr5 | 114518075 | 114518134 | 60     | 1 | 1 | 14 | 0.30102999 | 0.30102999 | 0 | 13 | 0 | 0.14303407 |
| chr5 | 114518134 | 114557744 | 39611  | 1 | 0 | 14 | 0          | 0.30102999 | 0 | 13 | 0 | 0.14303407 |
| chr5 | 114557744 | 114615445 | 57702  | 1 | 0 | 14 | 0          | 0.41314172 | 0 | 12 | 0 | 0.09290028 |
| chr5 | 114615445 | 114739019 | 123575 | 0 | 0 | 13 | 0          | 0.30102999 | 0 | 12 | 0 | 0.14385241 |

|      |           |           |        |   |   |    |   |            |   |    |   |            |
|------|-----------|-----------|--------|---|---|----|---|------------|---|----|---|------------|
| chr5 | 117455204 | 117657010 | 201807 | 1 | 0 | 5  | 0 | 0.07511598 | 0 | 7  | 0 | 0.43181735 |
| chr5 | 117657010 | 117657069 | 60     | 1 | 0 | 6  | 0 | 0.00166733 | 0 | 14 | 0 | 1.70763027 |
| chr5 | 117657069 | 117715795 | 58727  | 1 | 0 | 6  | 0 | 0.00373523 | 0 | 13 | 0 | 1.42397267 |
| chr5 | 117715795 | 117715854 | 60     | 1 | 0 | 8  | 0 | 0.01767679 | 0 | 13 | 0 | 0.91308053 |
| chr5 | 117715854 | 117869418 | 153565 | 2 | 0 | 8  | 0 | 0.03209037 | 0 | 12 | 0 | 0.72109894 |
| chr5 | 117869418 | 118088313 | 218896 | 2 | 0 | 8  | 0 | 0.01767679 | 0 | 13 | 0 | 0.91308053 |
| chr5 | 118088313 | 118280766 | 192454 | 4 | 0 | 7  | 0 | 0.00859896 | 0 | 13 | 0 | 1.14735594 |
| chr5 | 118280766 | 118299388 | 18623  | 2 | 0 | 8  | 0 | 0.01767679 | 0 | 13 | 0 | 0.91308053 |
| chr5 | 118299388 | 118356972 | 57585  | 2 | 0 | 8  | 0 | 0.03209037 | 0 | 12 | 0 | 0.72109894 |
| chr5 | 118356972 | 118414744 | 57773  | 2 | 0 | 8  | 0 | 0.00909834 | 0 | 13 | 0 | 1.13428373 |
| chr5 | 118414744 | 118507580 | 92837  | 2 | 0 | 7  | 0 | 0.00859896 | 0 | 14 | 0 | 1.14735594 |
| chr5 | 118507580 | 118651618 | 144039 | 5 | 0 | 8  | 0 | 0.00909834 | 0 | 14 | 0 | 1.13428373 |
| chr5 | 118651618 | 118753545 | 101928 | 2 | 0 | 7  | 0 | 0.00859896 | 0 | 13 | 0 | 1.14735594 |
| chr5 | 118753545 | 118812999 | 59455  | 2 | 0 | 8  | 0 | 0.01767679 | 0 | 13 | 0 | 0.91308053 |
| chr5 | 118812999 | 118837814 | 24816  | 1 | 0 | 7  | 0 | 0.00859896 | 0 | 13 | 0 | 1.14735594 |
| chr5 | 118837814 | 118913520 | 75707  | 1 | 0 | 6  | 0 | 0.00373523 | 0 | 13 | 0 | 1.42397267 |
| chr5 | 118913520 | 118968466 | 54947  | 2 | 0 | 8  | 0 | 0.01767679 | 0 | 13 | 0 | 0.91308053 |
| chr5 | 118968466 | 119121544 | 153079 | 1 | 0 | 7  | 0 | 0.00859896 | 0 | 13 | 0 | 1.14735594 |
| chr5 | 119121544 | 119230040 | 108497 | 1 | 0 | 7  | 0 | 0.01667721 | 0 | 12 | 0 | 0.92532268 |
| chr5 | 119230040 | 119354507 | 124468 | 4 | 0 | 5  | 0 | 0.00666883 | 0 | 11 | 0 | 1.20557689 |
| chr5 | 119354507 | 119472895 | 118389 | 1 | 0 | 9  | 0 | 0.00378107 | 0 | 9  | 0 | 1.33111237 |
| chr5 | 119472895 | 119595933 | 60     | 1 | 0 | 4  | 0 | 0.01077081 | 0 | 9  | 0 | 1.01542894 |
| chr5 | 119595933 | 119696984 | 101052 | 1 | 0 | 2  | 0 | 0.01053319 | 0 | 6  | 0 | 0.91219088 |
| chr5 | 119696984 | 119776567 | 79584  | 2 | 0 | 2  | 0 | 0.02162467 | 0 | 5  | 0 | 0.68214471 |
| chr5 | 119776567 | 119776626 | 60     | 1 | 0 | 3  | 0 | 0.01053319 | 0 | 6  | 0 | 0.91219088 |
| chr5 | 119776626 | 119816036 | 39411  | 1 | 0 | 2  | 0 | 0.01598258 | 0 | 7  | 0 | 0.84395715 |
| chr5 | 119816036 | 119954182 | 138147 | 3 | 0 | 0  | 0 | 0.0429175  | 0 | 4  | 0 | 0.47744371 |
| chr5 | 119954182 | 120022491 | 63185  | 1 | 0 | 1  | 0 | 0.02438896 | 0 | 3  | 0 | 0.51676182 |
| chr5 | 120022491 | 120085675 | 63185  | 2 | 0 | 1  | 0 | 0.05404976 | 0 | 2  | 0 | 0.30102999 |
| chr5 | 120085675 | 120367158 | 281844 | 2 | 0 | 0  | 0 | 0.02438896 | 0 | 3  | 0 | 0.51676182 |
| chr5 | 120367158 | 120449277 | 82120  | 2 | 0 | 1  | 0 | 0.05404976 | 0 | 1  | 0 | 0.30102999 |
| chr5 | 120449277 | 120449336 | 60     | 1 | 0 | 3  | 0 | 0.03070643 | 0 | 6  | 0 | 0.63695542 |
| chr5 | 120449336 | 120848731 | 399396 | 2 | 0 | 1  | 0 | 0.03070643 | 0 | 2  | 0 | 0.30102999 |
| chr5 | 120848731 | 120848790 | 60     | 1 | 0 | 4  | 0 | 0.03812622 | 0 | 6  | 0 | 0.60763643 |
| chr5 | 120848790 | 120991141 | 142352 | 1 | 0 | 3  | 0 | 0.03070643 | 0 | 6  | 0 | 0.63695542 |
| chr5 | 120991141 | 120991200 | 60     | 1 | 0 | 3  | 0 | 0.01598258 | 0 | 7  | 0 | 0.84395715 |
| chr5 | 120991200 | 121188438 | 197239 | 2 | 0 | 2  | 0 | 0.02162467 | 0 | 5  | 0 | 0.68214471 |
| chr5 | 121188438 | 121249950 | 61513  | 2 | 0 | 3  | 0 | 0.01598258 | 0 | 7  | 0 | 0.84395715 |
| chr5 | 121249950 | 121250009 | 60     | 1 | 0 | 4  | 0 | 0.02074938 | 0 | 8  | 0 | 0.79906872 |
| chr5 | 121250009 | 121599315 | 349307 | 6 | 0 | 4  | 0 | 0.03812622 | 0 | 6  | 0 | 0.60763643 |
| chr5 | 121599315 | 121599374 | 60     | 1 | 0 | 9  | 0 | 0.20975986 | 0 | 9  | 0 | 0.20975986 |
| chr5 | 121599374 | 121659945 | 60572  | 1 | 0 | 7  | 0 | 0.08584816 | 0 | 9  | 0 | 0.42015402 |
| chr5 | 121659945 | 121729626 | 69682  | 2 | 0 | 7  | 0 | 0.20469099 | 0 | 9  | 0 | 0.20469099 |
| chr5 | 121729626 | 121975965 | 246340 | 5 | 0 | 9  | 0 | 0.20975986 | 0 | 9  | 0 | 0.20975986 |
| chr5 | 121975965 | 122127751 | 151787 | 3 | 0 | 9  | 0 | 0.09154957 | 0 | 11 | 0 | 0.41444892 |
| chr5 | 122127751 | 122165645 | 37895  | 2 | 0 | 9  | 0 | 0.0565833  | 0 | 12 | 0 | 0.55190077 |
| chr5 | 122165645 | 122281809 | 116165 | 3 | 0 | 9  | 0 | 0.09154957 | 0 | 11 | 0 | 0.41444892 |
| chr5 | 122281809 | 122361508 | 79700  | 1 | 0 | 9  | 0 | 0.14135546 | 0 | 10 | 0 | 0.30102999 |
| chr5 | 122361508 | 122628967 | 274660 | 5 | 0 | 8  | 0 | 0.20764654 | 0 | 6  | 0 | 0.20764654 |
| chr5 | 122628967 | 122629026 | 60     | 1 | 0 | 9  | 0 | 0.30102999 | 0 | 8  | 0 | 0.13872638 |
| chr5 | 122629026 | 122694152 | 65127  | 1 | 0 | 8  | 0 | 0.30102999 | 0 | 7  | 0 | 0.13499366 |
| chr5 | 122694152 | 122748132 | 53981  | 2 | 0 | 8  | 0 | 0.4250187  | 0 | 8  | 0 | 0.08122616 |
| chr5 | 122748132 | 122748189 | 58     | 1 | 0 | 8  | 0 | 0.20764654 | 0 | 8  | 0 | 0.20764654 |
| chr5 | 122748189 | 122911510 | 163322 | 4 | 0 | 8  | 0 | 0.4250187  | 0 | 6  | 0 | 0.08122616 |
| chr5 | 122911510 | 123109346 | 197837 | 2 | 0 | 7  | 0 | 0.43181735 | 0 | 5  | 0 | 0.07511598 |
| chr5 | 123109346 | 123290915 | 181570 | 2 | 0 | 7  | 0 | 0.13499366 | 0 | 8  | 0 | 0.30102999 |
| chr5 | 123290915 | 123290974 | 60     | 1 | 0 | 7  | 0 | 0.08584816 | 0 | 9  | 0 | 0.42015402 |
| chr5 | 123290974 | 123457514 | 166541 | 1 | 0 | 5  | 0 | 0.07511598 | 0 | 7  | 0 | 0.43181735 |
| chr5 | 123457514 | 123522792 | 65279  | 1 | 0 | 4  | 0 | 0.06713722 | 0 | 6  | 0 | 0.44141547 |
| chr5 | 123522792 | 123614800 | 92009  | 1 | 0 | 3  | 0 | 0.03070643 | 0 | 6  | 0 | 0.63695542 |
| chr5 | 123614800 | 123783181 | 168382 | 1 | 0 | 3  | 0 | 0.10122019 | 0 | 4  | 0 | 0.30102999 |
| chr5 | 123783181 | 123968674 | 185494 | 2 | 0 | 3  | 0 | 0.17593012 | 0 | 3  | 0 | 0.17593012 |
| chr5 | 123968674 | 123968733 | 60     | 1 | 0 | 4  | 0 | 0.30102999 | 0 | 3  | 0 | 0.10122019 |
| chr5 | 123968733 | 124043644 | 74812  | 2 | 0 | 3  | 0 | 0.51676182 | 0 | 1  | 0 | 0.02438896 |
| chr5 | 124043644 | 124043603 | 60     | 1 | 0 | 3  | 0 | 0.30102999 | 0 | 3  | 0 | 0.10122019 |
| chr5 | 124043603 | 124159005 | 115403 | 3 | 0 | 3  | 0 | 0.51676182 | 0 | 4  | 0 | 0.02438896 |
| chr5 | 124159005 | 124363282 | 204278 | 3 | 0 | 4  | 0 | 0.18734596 | 0 | 4  | 0 | 0.18734596 |
| chr5 | 124363282 | 124363341 | 60     | 1 | 0 | 4  | 0 | 0.11390336 | 0 | 5  | 0 | 0.30102999 |
| chr5 | 124363341 | 124530336 | 166996 | 1 | 0 | 4  | 0 | 0.30102999 | 0 | 5  | 0 | 0.10122019 |
| chr5 | 124530336 | 124846125 | 315790 | 2 | 0 | 4  | 0 | 0.47744371 | 0 | 2  | 0 | 0.0429175  |
| chr5 | 124846125 | 124846184 | 60     | 1 | 0 | 7  | 0 | 0.60763643 | 0 | 4  | 0 | 0.03812622 |
| chr5 | 124846184 | 125007374 | 161191 | 1 | 0 | 6  | 0 | 0.44141547 | 0 | 4  | 0 | 0.06713722 |
| chr5 | 125007374 | 125007433 | 60     | 1 | 0 | 6  | 0 | 0.30102999 | 0 | 5  | 0 | 0.12309572 |
| chr5 | 125007433 | 125141620 | 134188 | 1 | 0 | 6  | 0 | 0.63695542 | 0 | 3  | 0 | 0.03070643 |
| chr5 | 125141620 | 125297047 | 155428 | 1 | 0 | 5  | 0 | 0.45545077 | 0 | 3  | 0 | 0.05670724 |
| chr5 | 125297047 | 125475206 | 178160 | 2 | 0 | 5  | 0 | 0.07511598 | 0 | 7  | 0 | 0.43181735 |
| chr5 | 125475206 | 125475265 | 60     | 1 | 0 | 8  | 0 | 0.20764654 | 0 | 8  | 0 | 0.20764654 |
| chr5 | 125475265 | 125774098 | 298834 | 2 | 0 | 8  | 0 | 0.30102999 | 0 | 7  | 0 | 0.13499366 |
| chr5 | 125774098 | 125794639 | 20542  | 2 | 0 | 9  | 0 | 0.20975986 | 0 | 9  | 0 | 0.20975986 |
| chr5 | 125794639 | 125829518 | 34880  | 2 | 0 | 10 | 0 | 0.30102999 | 0 | 9  | 0 | 0.14135546 |
| chr5 | 125829518 | 125882578 | 53061  | 2 | 0 | 9  | 0 | 0.30102999 | 0 | 8  | 0 | 0.13872638 |
| chr5 | 125882578 | 125882637 | 60     | 1 | 0 | 10 | 0 | 0.30102999 | 0 | 9  | 0 | 0.14135546 |
| chr5 | 125882637 | 125993510 | 110874 | 4 | 0 | 9  | 0 | 0.20975986 | 0 | 9  | 0 | 0.20975986 |
| chr5 | 125993510 | 126161864 | 168355 | 4 | 0 | 9  | 0 | 0.30102999 | 0 | 8  | 0 | 0.13872638 |
| chr5 | 126161864 | 126397126 | 235263 | 5 | 0 | 8  | 0 | 0.30102999 | 0 | 7  | 0 | 0.13499366 |
| chr5 | 126397126 | 126567625 | 170500 | 3 | 0 | 8  | 0 | 0.20764654 | 0 | 8  | 0 | 0.20764654 |
| chr5 | 126567625 | 126599054 | 31430  | 2 | 0 | 9  | 0 | 0.20975986 | 0 | 9  | 0 | 0.20975986 |
| chr5 | 126599054 | 126599113 | 60     | 1 | 0 | 9  | 0 | 0.14135546 | 0 | 10 | 0 | 0.30102999 |
| chr5 | 126599113 | 126694535 | 95423  | 2 | 0 | 9  | 0 | 0.20975986 | 0 | 9  | 0 | 0.20975986 |
| chr5 | 126694535 | 126694594 | 60     | 1 | 0 | 9  | 0 | 0.14135546 | 0 | 10 | 0 | 0.30102999 |
| chr5 | 126694594 | 126793496 | 98903  | 3 | 0 | 9  | 0 | 0.20975986 | 0 | 9  | 0 | 0.20975986 |
| chr5 | 126793496 | 126865996 | 72501  | 1 | 0 | 8  | 0 | 0.30102999 | 0 | 7  | 0 | 0.13499366 |
| chr5 | 126865996 | 126866055 | 60     | 1 | 0 | 8  | 0 | 0.20764654 | 0 | 8  | 0 | 0.20764654 |
| chr5 | 126866055 | 126934857 | 68803  | 3 | 0 | 8  | 0 | 0.30102999 | 0 | 7  | 0 | 0.13499366 |
| chr5 | 126934857 | 126934916 | 60     | 1 | 0 | 8  | 0 | 0.20764654 | 0 | 8  | 0 | 0.20764654 |
| chr5 | 126934916 | 127046164 | 111249 | 1 | 0 | 7  | 0 | 0.30102999 | 0 | 6  | 0 | 0.129913   |
| chr5 | 127046164 | 127046223 | 60     | 1 | 0 | 7  | 0 | 0.20469099 | 0 | 7  | 0 | 0.20469099 |
| chr5 | 127046223 | 127270100 | 223878 | 3 | 0 | 6  | 0 | 0.129913   | 0 | 7  | 0 | 0.30102999 |
| chr5 | 127270100 | 127270159 | 60     | 1 | 0 | 7  | 0 | 0.20469099 | 0 | 7  | 0 | 0.20469099 |
| chr5 | 127270159 | 127375077 | 104919 | 1 | 0 | 6  | 0 | 0.20064824 | 0 | 6  | 0 | 0.20064824 |
| chr5 | 127375077 | 12714554  | 339478 | 8 | 0 | 6  | 0 | 0.129913   | 0 | 7  | 0 | 0.30102999 |
| chr5 | 12714554  | 127767803 | 53     |   |   |    |   |            |   |    |   |            |

|      |           |           |        |   |   |    |   |            |   |    |   |            |
|------|-----------|-----------|--------|---|---|----|---|------------|---|----|---|------------|
| chr5 | 128990085 | 129025955 | 35871  | 1 | 0 | 5  | 0 | 0.12309572 | 0 | 6  | 0 | 0.30102999 |
| chr5 | 129025955 | 129157545 | 131591 | 3 | 0 | 5  | 0 | 0.19510895 | 0 | 5  | 0 | 0.19510895 |
| chr5 | 129157545 | 129309601 | 152057 | 2 | 0 | 5  | 0 | 0.30102999 | 0 | 4  | 0 | 0.11390336 |
| chr5 | 129309601 | 129309660 | 60     | 1 | 0 | 5  | 0 | 0.12309572 | 0 | 6  | 0 | 0.30102999 |
| chr5 | 129309660 | 129439531 | 129872 | 2 | 0 | 5  | 0 | 0.30102999 | 0 | 4  | 0 | 0.11390336 |
| chr5 | 129439531 | 129521150 | 81620  | 2 | 0 | 4  | 0 | 0.30102999 | 0 | 3  | 0 | 0.10122019 |
| chr5 | 129521150 | 129521209 | 60     | 1 | 0 | 4  | 0 | 0.11390336 | 0 | 5  | 0 | 0.30102999 |
| chr5 | 129521209 | 129687092 | 165884 | 1 | 0 | 3  | 0 | 0.10122019 | 0 | 4  | 0 | 0.30102999 |
| chr5 | 129687092 | 129687151 | 60     | 1 | 0 | 3  | 0 | 0.05670724 | 0 | 5  | 0 | 0.45545077 |
| chr5 | 129687151 | 129747565 | 60415  | 1 | 0 | 3  | 0 | 0.10122019 | 0 | 4  | 0 | 0.30102999 |
| chr5 | 129747565 | 129747624 | 60     | 1 | 0 | 3  | 0 | 0.05670724 | 0 | 5  | 0 | 0.45545077 |
| chr5 | 129747624 | 129876046 | 128423 | 1 | 0 | 3  | 0 | 0.17593012 | 0 | 3  | 0 | 0.17593012 |
| chr5 | 129876046 | 130006441 | 130396 | 2 | 0 | 3  | 0 | 0.10122019 | 0 | 4  | 0 | 0.30102999 |
| chr5 | 130006441 | 130166702 | 160262 | 2 | 0 | 3  | 0 | 0.0079614  | 0 | 8  | 0 | 1.07548421 |
| chr5 | 130166702 | 130278278 | 111577 | 2 | 0 | 8  | 0 | 0.08923391 | 0 | 10 | 0 | 0.4167287  |
| chr5 | 130278278 | 130278337 | 60     | 1 | 0 | 10 | 0 | 0.14303407 | 0 | 11 | 0 | 0.30102999 |
| chr5 | 130278337 | 130515797 | 237461 | 2 | 0 | 8  | 0 | 0.05490675 | 0 | 11 | 0 | 0.55623409 |
| chr5 | 130515797 | 130515856 | 60     | 1 | 0 | 8  | 0 | 0.01767679 | 0 | 13 | 0 | 0.91308053 |
| chr5 | 130515856 | 130535411 | 19556  | 1 | 0 | 8  | 0 | 0.03209037 | 0 | 12 | 0 | 0.72109894 |
| chr5 | 130535411 | 130652568 | 117158 | 2 | 0 | 8  | 0 | 0.05490675 | 0 | 11 | 0 | 0.55623409 |
| chr5 | 130652568 | 130698970 | 46403  | 2 | 0 | 8  | 0 | 0.03209037 | 0 | 12 | 0 | 0.72109894 |
| chr5 | 130698970 | 130699029 | 60     | 1 | 0 | 8  | 0 | 0.01767679 | 0 | 13 | 0 | 0.91308053 |
| chr5 | 130699029 | 130831319 | 132291 | 4 | 0 | 8  | 0 | 0.03209037 | 0 | 12 | 0 | 0.72109894 |
| chr5 | 130831319 | 130928339 | 87021  | 1 | 0 | 8  | 0 | 0.01767679 | 0 | 13 | 0 | 0.91308053 |
| chr5 | 130928339 | 130977930 | 49592  | 2 | 0 | 8  | 0 | 0.03209037 | 0 | 12 | 0 | 0.72109894 |
| chr5 | 130977930 | 131044312 | 66383  | 2 | 0 | 8  | 0 | 0.01767679 | 0 | 13 | 0 | 0.91308053 |
| chr5 | 131044312 | 131190312 | 146001 | 5 | 0 | 9  | 0 | 0.03310993 | 0 | 13 | 0 | 0.71538971 |
| chr5 | 131190312 | 131190371 | 60     | 1 | 0 | 10 | 0 | 0.05740087 | 0 | 13 | 0 | 0.5498098  |
| chr5 | 131190371 | 131251648 | 61278  | 1 | 0 | 9  | 0 | 0.03310993 | 0 | 13 | 0 | 0.71538971 |
| chr5 | 131251648 | 131251707 | 60     | 1 | 0 | 12 | 0 | 0.14385241 | 0 | 13 | 0 | 0.30102999 |
| chr5 | 131251707 | 131302175 | 50469  | 1 | 0 | 11 | 0 | 0.09334429 | 0 | 13 | 0 | 0.41271556 |
| chr5 | 131302175 | 131484039 | 181865 | 7 | 0 | 11 | 0 | 0.05740087 | 0 | 14 | 0 | 0.5498098  |
| chr5 | 131484039 | 131484098 | 60     | 1 | 0 | 12 | 0 | 0.09290028 | 0 | 14 | 0 | 0.41314172 |
| chr5 | 131484098 | 131528360 | 44263  | 1 | 0 | 11 | 0 | 0.05740087 | 0 | 14 | 0 | 0.5498098  |
| chr5 | 131528360 | 131528419 | 60     | 1 | 0 | 12 | 0 | 0.09290028 | 0 | 14 | 0 | 0.41314172 |
| chr5 | 131528419 | 131724586 | 196168 | 4 | 0 | 11 | 0 | 0.05740087 | 0 | 14 | 0 | 0.5498098  |
| chr5 | 131724586 | 131778715 | 54130  | 2 | 0 | 12 | 0 | 0.0565833  | 0 | 15 | 0 | 0.55190077 |
| chr5 | 131778715 | 131953901 | 175187 | 5 | 0 | 13 | 0 | 0.09154957 | 0 | 15 | 0 | 0.41444892 |
| chr5 | 131953901 | 132009648 | 55748  | 4 | 0 | 11 | 0 | 0.03310993 | 0 | 15 | 0 | 0.71538971 |
| chr5 | 132009648 | 132093891 | 84244  | 2 | 0 | 10 | 0 | 0.03344703 | 0 | 14 | 0 | 0.71353304 |
| chr5 | 132093891 | 132197917 | 104027 | 4 | 0 | 9  | 0 | 0.01817691 | 0 | 14 | 0 | 0.90719478 |
| chr5 | 132197917 | 132270440 | 75224  | 8 | 0 | 10 | 0 | 0.03344703 | 0 | 14 | 0 | 0.71353304 |
| chr5 | 132270440 | 132270499 | 60     | 1 | 0 | 10 | 0 | 0.01817691 | 0 | 15 | 0 | 0.90719478 |
| chr5 | 132270499 | 132400648 | 130150 | 4 | 0 | 10 | 0 | 0.03344703 | 0 | 14 | 0 | 0.71353304 |
| chr5 | 132400648 | 132543216 | 142569 | 3 | 0 | 11 | 0 | 0.05740087 | 0 | 14 | 0 | 0.5498098  |
| chr5 | 132543216 | 132659634 | 116419 | 3 | 0 | 12 | 0 | 0.0565833  | 0 | 15 | 0 | 0.55190077 |
| chr5 | 132659634 | 132745729 | 86096  | 2 | 0 | 12 | 0 | 0.09290028 | 0 | 14 | 0 | 0.41314172 |
| chr5 | 132745729 | 132745788 | 60     | 1 | 0 | 12 | 0 | 0.01667721 | 0 | 17 | 0 | 0.92532268 |
| chr5 | 132745788 | 132820420 | 74633  | 2 | 0 | 12 | 0 | 0.03209037 | 0 | 16 | 0 | 0.72109894 |
| chr5 | 132820420 | 132943728 | 123309 | 2 | 0 | 11 | 0 | 0.03310993 | 0 | 15 | 0 | 0.71538971 |
| chr5 | 132943728 | 132998301 | 54574  | 2 | 0 | 11 | 0 | 0.01767679 | 0 | 16 | 0 | 0.91308053 |
| chr5 | 132998301 | 132998360 | 60     | 1 | 0 | 12 | 0 | 0.03209037 | 0 | 16 | 0 | 0.72109894 |
| chr5 | 132998360 | 133096935 | 98576  | 1 | 0 | 11 | 0 | 0.05740087 | 0 | 14 | 0 | 0.5498098  |
| chr5 | 133096935 | 133096994 | 60     | 1 | 0 | 11 | 0 | 0.03310993 | 0 | 15 | 0 | 0.71538971 |
| chr5 | 133096994 | 133171114 | 74121  | 1 | 0 | 11 | 0 | 0.05740087 | 0 | 14 | 0 | 0.5498098  |
| chr5 | 133171114 | 133171173 | 60     | 1 | 0 | 11 | 0 | 0.03310993 | 0 | 15 | 0 | 0.71538971 |
| chr5 | 133171173 | 133295735 | 124563 | 1 | 0 | 8  | 0 | 0.01767679 | 0 | 13 | 0 | 0.91308053 |
| chr5 | 133295735 | 133325740 | 30006  | 1 | 0 | 7  | 0 | 0.00859896 | 0 | 13 | 0 | 1.14735594 |
| chr5 | 133325740 | 133325799 | 60     | 1 | 0 | 9  | 0 | 0.00926608 | 0 | 15 | 0 | 1.13004284 |
| chr5 | 133325799 | 133338007 | 12209  | 8 | 0 | 8  | 0 | 0.00909834 | 0 | 14 | 0 | 1.13428373 |
| chr5 | 133338007 | 133395340 | 57334  | 2 | 0 | 9  | 0 | 0.01817691 | 0 | 14 | 0 | 0.90719478 |
| chr5 | 133395340 | 133395399 | 60     | 1 | 0 | 9  | 0 | 0.00926608 | 0 | 15 | 0 | 1.13004284 |
| chr5 | 133395399 | 133428495 | 33097  | 1 | 0 | 8  | 0 | 0.00433294 | 0 | 15 | 0 | 1.3873209  |
| chr5 | 133428495 | 133481929 | 53435  | 4 | 0 | 8  | 0 | 0.00188727 | 0 | 16 | 0 | 1.67551277 |
| chr5 | 133481929 | 133560263 | 78335  | 3 | 0 | 6  | 0 | 2.57E-04   | 0 | 16 | 0 | 2.37598969 |
| chr5 | 133560263 | 133657951 | 97489  | 3 | 0 | 6  | 0 | 7.41E-04   | 0 | 16 | 0 | 0.03387238 |
| chr5 | 133657951 | 133695676 | 28126  | 1 | 0 | 6  | 0 | 6.86E-04   | 0 | 15 | 0 | 2.02387299 |
| chr5 | 133695676 | 133716502 | 20827  | 2 | 0 | 6  | 0 | 0.00373523 | 0 | 13 | 0 | 1.42397267 |
| chr5 | 133716502 | 133738926 | 22425  | 3 | 0 | 6  | 0 | 6.86E-04   | 0 | 15 | 0 | 2.02387299 |
| chr5 | 133738926 | 133746561 | 7636   | 2 | 0 | 5  | 0 | 5.83E-04   | 0 | 14 | 0 | 2.06733314 |
| chr5 | 133746561 | 133845877 | 99317  | 1 | 0 | 5  | 0 | 0.00141024 | 0 | 13 | 0 | 1.7506523  |
| chr5 | 133845877 | 133845936 | 60     | 1 | 0 | 7  | 0 | 7.41E-04   | 0 | 16 | 0 | 2.00316618 |
| chr5 | 133845936 | 133909957 | 64022  | 2 | 0 | 6  | 0 | 0.00166733 | 0 | 14 | 0 | 1.70763027 |
| chr5 | 133909957 | 133937242 | 27286  | 2 | 0 | 6  | 0 | 6.86E-04   | 0 | 15 | 0 | 2.02387299 |
| chr5 | 133937242 | 134036265 | 99024  | 2 | 0 | 6  | 0 | 0.00166733 | 0 | 14 | 0 | 1.70763027 |
| chr5 | 134036265 | 134087365 | 51101  | 3 | 0 | 6  | 0 | 6.86E-04   | 0 | 15 | 0 | 2.02387299 |
| chr5 | 134087365 | 134164933 | 77569  | 3 | 0 | 5  | 0 | 2.22E-04   | 0 | 15 | 0 | 2.41659593 |
| chr5 | 134164933 | 134236385 | 71453  | 3 | 0 | 5  | 0 | 5.83E-04   | 0 | 14 | 0 | 2.06733314 |
| chr5 | 134236385 | 134257631 | 21247  | 2 | 0 | 5  | 0 | 7.71E-05   | 0 | 16 | 0 | 2.80176103 |
| chr5 | 134257631 | 134296200 | 38570  | 1 | 0 | 5  | 0 | 2.22E-04   | 0 | 15 | 0 | 2.41659593 |
| chr5 | 134296200 | 134305174 | 8975   | 2 | 0 | 6  | 0 | 2.57E-04   | 0 | 16 | 0 | 2.37598969 |
| chr5 | 134305174 | 134442297 | 137124 | 2 | 0 | 5  | 0 | 5.83E-04   | 0 | 14 | 0 | 2.06733314 |
| chr5 | 134442297 | 134442356 | 60     | 1 | 0 | 6  | 0 | 8.69E-05   | 0 | 17 | 0 | 2.76830915 |
| chr5 | 134442356 | 134495421 | 53066  | 1 | 0 | 6  | 0 | 2.57E-04   | 0 | 16 | 0 | 2.37598969 |
| chr5 | 134495421 | 134604936 | 109516 | 1 | 0 | 6  | 0 | 0.00166733 | 0 | 14 | 0 | 1.70763027 |
| chr5 | 134604936 | 134670438 | 65503  | 2 | 0 | 7  | 0 | 0.00413023 | 0 | 14 | 0 | 1.39918918 |
| chr5 | 134670438 | 134670497 | 60     | 1 | 0 | 8  | 0 | 0.00909834 | 0 | 14 | 0 | 1.13428373 |
| chr5 | 134670497 | 134714599 | 44103  | 1 | 0 | 7  | 0 | 0.00413023 | 0 | 14 | 0 | 1.39918918 |
| chr5 | 134714599 | 134837808 | 123210 | 3 | 0 | 4  | 0 | 1.70E-04   | 0 | 14 | 0 | 2.48919369 |
| chr5 | 134837808 | 134837867 | 60     | 1 | 0 | 5  | 0 | 5.83E-04   | 0 | 14 | 0 | 2.06733314 |
| chr5 | 134837867 | 134870691 | 32825  | 1 | 0 | 4  | 0 | 1.70E-04   | 0 | 14 | 0 | 2.48919369 |
| chr5 | 134870691 | 135172706 | 302016 | 3 | 0 | 4  | 0 | 4.45E-04   | 0 | 13 | 0 | 2.13824703 |
| chr5 | 135172706 | 135272480 | 99775  | 5 | 0 | 6  | 0 | 0.00166733 | 0 | 14 | 0 | 1.70763027 |
| chr5 | 135272480 | 135288803 | 16324  | 2 | 0 | 9  | 0 | 0.01817691 | 0 | 14 | 0 | 0.90719478 |
| chr5 | 135288803 | 135416143 | 127341 | 4 | 0 | 7  | 0 | 0.00373523 | 0 | 13 | 0 | 1.42397267 |
| chr5 | 135416143 | 135508234 | 92092  | 4 | 0 | 7  | 0 | 0.00413023 | 0 | 14 | 0 | 1.39918918 |
| chr5 | 135508234 | 135583508 | 75275  | 5 | 0 | 8  | 0 | 0.00909834 | 0 | 14 | 0 | 1.13428373 |
| chr5 | 135583508 | 135633485 | 49978  | 3 | 0 | 9  | 0 | 0.00926608 | 0 | 15 | 0 | 1.13004284 |
| chr5 | 135633485 | 135673896 | 40412  | 2 | 0 | 10 | 0 | 0.01817691 | 0 | 15 | 0 | 0.90719478 |
| chr5 | 135673896 | 135734222 | 60327  | 1 | 0 | 9  | 0 | 0.00926608 | 0 | 15 | 0 | 1.13004284 |
| chr5 | 135734222 | 135995553 | 261332 | 2 | 0 | 8  | 0 | 0.00433294 | 0 | 15 | 0 | 1.3873209  |
|      |           |           |        |   |   |    |   |            |   |    |   |            |

|      |           |           |        |    |   |    |            |            |   |    |   |            |
|------|-----------|-----------|--------|----|---|----|------------|------------|---|----|---|------------|
| chr5 | 138052651 | 138119087 | 66437  | 1  | 0 | 9  | 0          | 0.00926608 | 0 | 15 | 0 | 1.13004284 |
| chr5 | 138119087 | 138268912 | 149826 | 3  | 0 | 9  | 0          | 0.0313093  | 0 | 13 | 0 | 0.71538971 |
| chr5 | 138268912 | 138308907 | 39996  | 1  | 0 | 8  | 0          | 0.03209037 | 0 | 12 | 0 | 0.72109894 |
| chr5 | 138308907 | 138308966 | 60     | 1  | 1 | 9  | 0.30102999 | 0.0313093  | 0 | 13 | 0 | 0.71538971 |
| chr5 | 138308966 | 138411206 | 102241 | 2  | 1 | 8  | 0.30102999 | 0.05490675 | 0 | 11 | 0 | 0.55623409 |
| chr5 | 138411206 | 138439097 | 27892  | 1  | 1 | 7  | 0.30102999 | 0.05232577 | 0 | 10 | 0 | 0.56314362 |
| chr5 | 138439097 | 138464022 | 24926  | 2  | 1 | 7  | 0.30102999 | 0.03037338 | 0 | 11 | 0 | 0.73110763 |
| chr5 | 138464022 | 138576104 | 112083 | 2  | 0 | 6  | 0          | 0.02793176 | 0 | 10 | 0 | 0.74627054 |
| chr5 | 138576104 | 138576163 | 60     | 1  | 1 | 8  | 0.30102999 | 0.08923391 | 0 | 10 | 0 | 0.4167287  |
| chr5 | 138576163 | 138631938 | 55776  | 1  | 0 | 8  | 0          | 0.08923391 | 0 | 10 | 0 | 0.4167287  |
| chr5 | 138631938 | 138631997 | 60     | 1  | 0 | 9  | 0          | 0.0313093  | 0 | 13 | 0 | 0.71538971 |
| chr5 | 138631997 | 138753046 | 121050 | 7  | 0 | 8  | 0          | 0.01767679 | 0 | 13 | 0 | 0.91308053 |
| chr5 | 138753046 | 138927861 | 174816 | 2  | 0 | 7  | 0          | 0.03037338 | 0 | 11 | 0 | 0.73110763 |
| chr5 | 138927861 | 139037798 | 109938 | 3  | 0 | 6  | 0          | 0.01518174 | 0 | 11 | 0 | 0.9449689  |
| chr5 | 139037798 | 139037857 | 60     | 1  | 0 | 8  | 0          | 0.00909834 | 0 | 14 | 0 | 1.13428373 |
| chr5 | 139037857 | 139137264 | 99408  | 2  | 0 | 6  | 0          | 0.00166733 | 0 | 14 | 0 | 1.70763027 |
| chr5 | 139137264 | 139223498 | 86235  | 3  | 0 | 6  | 0          | 6.86E-04   | 0 | 15 | 0 | 2.02387299 |
| chr5 | 139223498 | 139299777 | 76280  | 3  | 0 | 7  | 0          | 0.00183109 | 0 | 15 | 0 | 1.68336308 |
| chr5 | 139299777 | 139555702 | 255926 | 6  | 0 | 9  | 0          | 0.00926608 | 0 | 15 | 0 | 1.13004284 |
| chr5 | 139555702 | 139623279 | 67578  | 2  | 0 | 8  | 0          | 0.00433294 | 0 | 15 | 0 | 1.3873209  |
| chr5 | 139623279 | 139648821 | 59     | 1  | 0 | 9  | 0          | 0.01817691 | 0 | 15 | 0 | 0.90719478 |
| chr5 | 139648821 | 139648821 | 25185  | 1  | 0 | 8  | 0          | 0.00926608 | 0 | 15 | 0 | 1.13004284 |
| chr5 | 139648821 | 139713291 | 64771  | 1  | 0 | 8  | 0          | 0.00433294 | 0 | 15 | 0 | 1.3873209  |
| chr5 | 139713291 | 139940834 | 227544 | 7  | 0 | 9  | 0          | 0.00926608 | 0 | 15 | 0 | 1.13004284 |
| chr5 | 139940834 | 140024110 | 83277  | 4  | 0 | 10 | 0          | 0.01817691 | 0 | 15 | 0 | 0.90719478 |
| chr5 | 140024110 | 140026698 | 2589   | 2  | 0 | 10 | 0          | 0.00909834 | 0 | 16 | 0 | 1.13428373 |
| chr5 | 140026698 | 140348951 | 322254 | 12 | 0 | 10 | 0          | 0.01817691 | 0 | 15 | 0 | 0.90719478 |
| chr5 | 140348951 | 140603311 | 254361 | 17 | 0 | 10 | 0          | 0.00909834 | 0 | 16 | 0 | 1.13428373 |
| chr5 | 140603311 | 140626204 | 22894  | 1  | 0 | 10 | 0          | 0.01817691 | 0 | 15 | 0 | 0.90719478 |
| chr5 | 140626204 | 140682380 | 56177  | 2  | 0 | 10 | 0          | 0.03344703 | 0 | 14 | 0 | 0.71353304 |
| chr5 | 140682380 | 140698320 | 15941  | 2  | 0 | 10 | 0          | 0.00909834 | 0 | 16 | 0 | 1.13428373 |
| chr5 | 140698320 | 140699278 | 959    | 3  | 0 | 10 | 0          | 0.00413023 | 0 | 17 | 0 | 1.39918918 |
| chr5 | 140699278 | 140905904 | 206627 | 5  | 0 | 10 | 0          | 0.00909834 | 0 | 16 | 0 | 1.13428373 |
| chr5 | 140905904 | 140966681 | 60778  | 2  | 0 | 10 | 0          | 0.01817691 | 0 | 15 | 0 | 0.90719478 |
| chr5 | 140966681 | 141112393 | 145713 | 9  | 0 | 10 | 0          | 0.00909834 | 0 | 16 | 0 | 1.13428373 |
| chr5 | 141112393 | 141329234 | 216842 | 4  | 0 | 10 | 0          | 0.01817691 | 0 | 15 | 0 | 0.90719478 |
| chr5 | 141329234 | 141391993 | 62760  | 3  | 0 | 9  | 0          | 0.00926608 | 0 | 15 | 0 | 1.13004284 |
| chr5 | 141391993 | 141392037 | 45     | 1  | 0 | 10 | 0          | 0.01817691 | 0 | 15 | 0 | 0.90719478 |
| chr5 | 141392037 | 141505819 | 113783 | 1  | 0 | 9  | 0          | 0.00926608 | 0 | 15 | 0 | 1.13004284 |
| chr5 | 141505819 | 141533709 | 27891  | 2  | 0 | 8  | 0          | 0.00433294 | 0 | 15 | 0 | 1.3873209  |
| chr5 | 141533709 | 141617510 | 83802  | 1  | 0 | 7  | 0          | 0.00413023 | 0 | 14 | 0 | 1.39918918 |
| chr5 | 141617510 | 141708006 | 90497  | 4  | 0 | 8  | 0          | 0.00909834 | 0 | 14 | 0 | 1.13428373 |
| chr5 | 141708006 | 141781422 | 73417  | 1  | 0 | 8  | 0          | 0.01767679 | 0 | 13 | 0 | 0.91308053 |
| chr5 | 141781422 | 141877113 | 95692  | 1  | 0 | 5  | 0          | 0.00317045 | 0 | 12 | 0 | 1.46403142 |
| chr5 | 141877113 | 142006212 | 129100 | 2  | 0 | 5  | 0          | 0.01320236 | 0 | 10 | 0 | 0.97390707 |
| chr5 | 142006212 | 142301852 | 295641 | 6  | 0 | 5  | 0          | 0.07511598 | 0 | 7  | 0 | 0.43181735 |
| chr5 | 142301852 | 142301911 | 60     | 1  | 0 | 5  | 0          | 0.04407651 | 0 | 8  | 0 | 0.58747015 |
| chr5 | 142301911 | 142329740 | 27830  | 1  | 0 | 4  | 0          | 0.02074938 | 0 | 8  | 0 | 0.79906872 |
| chr5 | 142329740 | 142500738 | 170999 | 3  | 0 | 4  | 0          | 0.03812622 | 0 | 7  | 0 | 0.60763643 |
| chr5 | 142500738 | 142607457 | 106720 | 2  | 0 | 4  | 0          | 0.06713722 | 0 | 6  | 0 | 0.44141547 |
| chr5 | 142607457 | 142688518 | 81062  | 2  | 0 | 5  | 0          | 0.04407651 | 0 | 8  | 0 | 0.58747015 |
| chr5 | 142688518 | 142859458 | 170941 | 4  | 0 | 8  | 0          | 0.02074938 | 0 | 8  | 0 | 0.79906872 |
| chr5 | 142859458 | 142990952 | 131495 | 2  | 0 | 5  | 0          | 0.04407651 | 0 | 8  | 0 | 0.58747015 |
| chr5 | 142990952 | 142991011 | 60     | 1  | 0 | 6  | 0          | 0.08122616 | 0 | 8  | 0 | 0.4250187  |
| chr5 | 142991011 | 143289610 | 298600 | 3  | 0 | 4  | 0          | 0.06713722 | 0 | 6  | 0 | 0.44141547 |
| chr5 | 143289610 | 143485669 | 196060 | 2  | 0 | 4  | 0          | 0.03812622 | 0 | 7  | 0 | 0.60763643 |
| chr5 | 143485669 | 143620852 | 135184 | 7  | 0 | 7  | 0          | 0.05232577 | 0 | 10 | 0 | 0.56314362 |
| chr5 | 143620852 | 143733617 | 112766 | 2  | 0 | 7  | 0          | 0.08584816 | 0 | 9  | 0 | 0.42015402 |
| chr5 | 143733617 | 143882271 | 148655 | 4  | 0 | 7  | 0          | 0.05232577 | 0 | 10 | 0 | 0.56314362 |
| chr5 | 143882271 | 144027588 | 145318 | 2  | 0 | 9  | 0          | 0.14135546 | 0 | 10 | 0 | 0.30102999 |
| chr5 | 144027588 | 144141705 | 114118 | 2  | 0 | 10 | 0          | 0.21118145 | 0 | 10 | 0 | 0.21118145 |
| chr5 | 144141705 | 144298775 | 157071 | 1  | 0 | 9  | 0          | 0.14135546 | 0 | 10 | 0 | 0.30102999 |
| chr5 | 144298775 | 144298834 | 60     | 1  | 0 | 9  | 0          | 0.09154957 | 0 | 11 | 0 | 0.41444892 |
| chr5 | 144298834 | 144528930 | 230097 | 1  | 0 | 4  | 0          | 0.00530919 | 0 | 10 | 0 | 1.2568129  |
| chr5 | 144528930 | 144618270 | 89341  | 1  | 0 | 4  | 0          | 0.06713722 | 0 | 6  | 0 | 0.44141547 |
| chr5 | 144618270 | 144777001 | 158732 | 2  | 0 | 4  | 0          | 0.03812622 | 0 | 7  | 0 | 0.60763643 |
| chr5 | 144777001 | 144777060 | 60     | 1  | 0 | 4  | 0          | 0.12991313 | 0 | 7  | 0 | 0.30102999 |
| chr5 | 144777060 | 145067292 | 290233 | 2  | 0 | 4  | 0          | 0.03812622 | 0 | 7  | 0 | 0.60763643 |
| chr5 | 145067292 | 145250672 | 183381 | 5  | 0 | 5  | 0          | 0.07511598 | 0 | 7  | 0 | 0.43181735 |
| chr5 | 145250672 | 145250731 | 60     | 1  | 0 | 5  | 0          | 0.04407651 | 0 | 8  | 0 | 0.58747015 |
| chr5 | 145250731 | 145317535 | 66805  | 1  | 0 | 5  | 0          | 0.07511598 | 0 | 7  | 0 | 0.43181735 |
| chr5 | 145317535 | 145405642 | 88108  | 2  | 0 | 4  | 0          | 0.03812622 | 0 | 7  | 0 | 0.60763643 |
| chr5 | 145405642 | 145492927 | 87286  | 3  | 0 | 4  | 0          | 0.02074938 | 0 | 8  | 0 | 0.79906872 |
| chr5 | 145492927 | 145758233 | 265307 | 7  | 0 | 5  | 0          | 0.04407651 | 0 | 8  | 0 | 0.58747015 |
| chr5 | 145758233 | 145758292 | 60     | 1  | 1 | 5  | 0.30102999 | 0.04407651 | 0 | 8  | 0 | 0.58747015 |
| chr5 | 145758292 | 145830751 | 72460  | 1  | 0 | 5  | 0          | 0.04407651 | 0 | 8  | 0 | 0.58747015 |
| chr5 | 145830751 | 145883015 | 52265  | 3  | 0 | 6  | 0          | 0.04875589 | 0 | 9  | 0 | 0.5732208  |
| chr5 | 145883015 | 145904094 | 21080  | 3  | 0 | 8  | 0          | 0.01767679 | 0 | 13 | 0 | 0.91308053 |
| chr5 | 145904094 | 145969193 | 65100  | 1  | 0 | 7  | 0          | 0.01667721 | 0 | 12 | 0 | 0.92532268 |
| chr5 | 145969193 | 146015634 | 46442  | 1  | 0 | 7  | 0          | 0.03037338 | 0 | 11 | 0 | 0.73110763 |
| chr5 | 146015634 | 146015693 | 60     | 1  | 0 | 7  | 0          | 0.01667721 | 0 | 12 | 0 | 0.92532268 |
| chr5 | 146015693 | 146111506 | 95814  | 2  | 0 | 6  | 0          | 0.00778066 | 0 | 12 | 0 | 1.17038931 |
| chr5 | 146111506 | 146164041 | 52536  | 2  | 0 | 7  | 0          | 0.00859896 | 0 | 13 | 0 | 1.14735594 |
| chr5 | 146164041 | 146295856 | 131816 | 3  | 0 | 7  | 0          | 0.01767679 | 0 | 13 | 0 | 0.91308053 |
| chr5 | 146295856 | 146328248 | 32393  | 1  | 0 | 8  | 0          | 0.00859896 | 0 | 13 | 0 | 1.14735594 |
| chr5 | 146328248 | 146379171 | 50924  | 2  | 0 | 6  | 0          | 0.00373523 | 0 | 13 | 0 | 1.42397267 |
| chr5 | 146379171 | 146416339 | 37169  | 2  | 0 | 7  | 0          | 0.00859896 | 0 | 13 | 0 | 1.14735594 |
| chr5 | 146416339 | 146602755 | 186417 | 4  | 0 | 8  | 0          | 0.01767679 | 0 | 13 | 0 | 0.91308053 |
| chr5 | 146602755 | 146602814 | 60     | 1  | 0 | 9  | 0          | 0.0313093  | 0 | 13 | 0 | 0.71538971 |
| chr5 | 146602814 | 146641446 | 38633  | 1  | 0 | 8  | 0          | 0.01767679 | 0 | 13 | 0 | 0.91308053 |
| chr5 | 146641446 | 146753168 | 111723 | 2  | 0 | 7  | 0          | 0.03037338 | 0 | 11 | 0 | 0.73110763 |
| chr5 | 146753168 | 146753227 | 60     | 1  | 0 | 8  | 0          | 0.03209037 | 0 | 12 | 0 | 0.72109894 |
| chr5 | 146753227 | 146823310 | 70084  | 2  | 0 | 8  | 0          | 0.05490675 | 0 | 11 | 0 | 0.55623409 |
| chr5 | 146823310 | 146823369 | 60     | 1  | 0 | 8  | 0          | 0.03209037 | 0 | 12 | 0 | 0.72109894 |
| chr5 | 146823369 | 146866462 | 43094  | 1  | 0 | 8  | 0          | 0.05490675 | 0 | 11 | 0 | 0.55623409 |
| chr5 | 146866462 | 147092055 | 225594 | 4  | 0 | 8  | 0          | 0.08923391 | 0 | 10 | 0 | 0.4167287  |
| chr5 | 147092055 | 147137334 | 45280  | 2  | 0 | 9  | 0          | 0.0313093  | 0 | 13 | 0 | 0.71538971 |
| chr5 | 147137334 | 147395908 | 258575 | 6  | 0 | 10 | 0          | 0.0574087  | 0 | 13 | 0 | 0.5498098  |
| chr5 | 147395908 | 147765543 | 369636 | 8  | 0 | 9  | 0          | 0.0313093  | 0 | 13 | 0 | 0.71538971 |
| chr5 | 147765543 | 147902806 | 137264 | 4  | 0 | 9  | 0          | 0.01817691 | 0 | 14 | 0 | 0.90719478 |
| chr5 | 147902806 | 147928    |        |    |   |    |            |            |   |    |   |            |

|      |           |           |        |    |   |    |           |            |   |    |            |            |
|------|-----------|-----------|--------|----|---|----|-----------|------------|---|----|------------|------------|
| chr5 | 149091881 | 149091940 | 60     | 1  | 0 | 8  | 0         | 0.01767679 | 0 | 13 | 0          | 0.91308053 |
| chr5 | 149091940 | 149190659 | 98720  | 3  | 0 | 8  | 0         | 0.03209037 | 0 | 12 | 0          | 0.72109894 |
| chr5 | 149190659 | 149190718 | 60     | 1  | 0 | 8  | 0         | 0.01767679 | 0 | 13 | 0          | 0.91308053 |
| chr5 | 149190718 | 149225661 | 34944  | 1  | 0 | 8  | 0         | 0.03209037 | 0 | 12 | 0          | 0.72109894 |
| chr5 | 149225661 | 149238841 | 13181  | 2  | 0 | 8  | 0         | 0.05490675 | 0 | 11 | 0          | 0.55623409 |
| chr5 | 149238841 | 149310691 | 71851  | 3  | 0 | 8  | 0         | 0.03209037 | 0 | 12 | 0          | 0.72109894 |
| chr5 | 149310691 | 149372929 | 62239  | 3  | 0 | 8  | 0         | 0.00909834 | 0 | 14 | 0          | 1.13428373 |
| chr5 | 149372929 | 149456918 | 83990  | 2  | 0 | 8  | 0         | 0.01767679 | 0 | 13 | 0          | 0.91308053 |
| chr5 | 149456918 | 149488198 | 31281  | 2  | 0 | 8  | 0         | 0.00909834 | 0 | 14 | 0          | 1.13428373 |
| chr5 | 149488198 | 149488255 | 58     | 1  | 0 | 8  | 0         | 0.00433294 | 0 | 15 | 0          | 1.3873209  |
| chr5 | 149488255 | 149534421 | 46167  | 3  | 0 | 8  | 0         | 0.00909834 | 0 | 14 | 0          | 1.13428373 |
| chr5 | 149534421 | 149571293 | 36873  | 3  | 0 | 8  | 0         | 0.00433294 | 0 | 15 | 0          | 1.3873209  |
| chr5 | 149571293 | 149601496 | 30204  | 2  | 0 | 9  | 0         | 0.00433294 | 0 | 16 | 0          | 1.3873209  |
| chr5 | 149601496 | 149645528 | 44033  | 2  | 0 | 9  | 0         | 0.00926608 | 0 | 15 | 0          | 1.13004284 |
| chr5 | 149645528 | 149645587 | 60     | 1  | 0 | 10 | 0         | 0.00909834 | 0 | 16 | 0          | 1.13428373 |
| chr5 | 149645587 | 149724544 | 78958  | 1  | 0 | 10 | 0         | 0.01817691 | 0 | 15 | 0          | 0.90719478 |
| chr5 | 149724544 | 149758765 | 34222  | 1  | 0 | 10 | 0         | 0.03344703 | 0 | 14 | 0          | 0.71353304 |
| chr5 | 149758765 | 149779027 | 20263  | 3  | 0 | 10 | 0         | 0.01817691 | 0 | 15 | 0          | 0.90719478 |
| chr5 | 149779027 | 149899981 | 120955 | 3  | 0 | 10 | 0         | 0.05740087 | 0 | 13 | 0          | 0.5498098  |
| chr5 | 149899981 | 149921879 | 21899  | 3  | 0 | 11 | 0         | 0.05740087 | 0 | 14 | 0          | 0.5498098  |
| chr5 | 149921879 | 149933476 | 11598  | 1  | 0 | 9  | 0         | 0.03310993 | 0 | 13 | 0          | 0.71538971 |
| chr5 | 149933476 | 150040974 | 107499 | 4  | 0 | 9  | 0         | 0.01817691 | 0 | 14 | 0          | 0.90719478 |
| chr5 | 150040974 | 150050296 | 9323   | 1  | 0 | 9  | 0         | 0.0565833  | 0 | 12 | 0          | 0.55190077 |
| chr5 | 150050296 | 150070524 | 20229  | 2  | 0 | 10 | 0         | 0.09290028 | 0 | 12 | 0          | 0.41314172 |
| chr5 | 150070524 | 150138814 | 68291  | 4  | 0 | 10 | 0         | 0.05740087 | 0 | 13 | 0          | 0.5498098  |
| chr5 | 150138814 | 150176098 | 37285  | 2  | 0 | 10 | 0         | 0.01817691 | 0 | 15 | 0          | 0.90719478 |
| chr5 | 150176098 | 150280038 | 103941 | 2  | 0 | 10 | 0         | 0.05740087 | 0 | 13 | 0          | 0.5498098  |
| chr5 | 150280038 | 150283559 | 3522   | 2  | 0 | 11 | 0         | 0.03310993 | 0 | 15 | 0          | 0.71538971 |
| chr5 | 150283559 | 150403830 | 120272 | 2  | 0 | 10 | 0         | 0.01817691 | 0 | 15 | 0          | 0.90719478 |
| chr5 | 150403830 | 150459548 | 55719  | 3  | 0 | 11 | 0         | 0.01767679 | 0 | 16 | 0          | 0.91308053 |
| chr5 | 150459548 | 150515017 | 55470  | 1  | 0 | 11 | 0         | 0.03310993 | 0 | 15 | 0          | 0.71538971 |
| chr5 | 150515017 | 150534761 | 19745  | 2  | 0 | 10 | 0         | 0.0565833  | 0 | 15 | 0          | 0.55190077 |
| chr5 | 150534761 | 150604966 | 70206  | 4  | 0 | 12 | 0         | 0.03209037 | 0 | 16 | 0          | 0.72109894 |
| chr5 | 150604966 | 150680422 | 75457  | 2  | 0 | 12 | 0         | 0.0565833  | 0 | 15 | 0          | 0.55190077 |
| chr5 | 150680422 | 150738907 | 58486  | 3  | 0 | 12 | 0         | 0.01667721 | 0 | 17 | 0          | 0.92532268 |
| chr5 | 150738907 | 150861311 | 122405 | 2  | 0 | 12 | 0         | 0.0565833  | 0 | 15 | 0          | 0.55190077 |
| chr5 | 150861311 | 150863648 | 2338   | 2  | 0 | 12 | 0         | 0.03209037 | 0 | 16 | 0          | 0.72109894 |
| chr5 | 150863648 | 150925466 | 61819  | 1  | 0 | 11 | 0         | 0.03310993 | 0 | 15 | 0          | 0.71538971 |
| chr5 | 150925466 | 151007188 | 81723  | 2  | 0 | 11 | 0         | 0.05740087 | 0 | 14 | 0          | 0.5498098  |
| chr5 | 151007188 | 151048914 | 41727  | 2  | 0 | 11 | 0         | 0.03310993 | 0 | 15 | 0          | 0.71538971 |
| chr5 | 151048914 | 151126010 | 77097  | 4  | 0 | 12 | 0         | 0.0565833  | 0 | 15 | 0          | 0.55190077 |
| chr5 | 151126010 | 151154377 | 28368  | 1  | 0 | 12 | 0         | 0.09290028 | 0 | 14 | 0          | 0.41314172 |
| chr5 | 151154377 | 151154436 | 60     | 1  | 0 | 12 | 0         | 0.0565833  | 0 | 15 | 0          | 0.55190077 |
| chr5 | 151154436 | 151179692 | 25257  | 1  | 0 | 12 | 0         | 0.09290028 | 0 | 14 | 0          | 0.41314172 |
| chr5 | 151179692 | 151277117 | 97426  | 4  | 0 | 12 | 0         | 0.0565833  | 0 | 15 | 0          | 0.55190077 |
| chr5 | 151277117 | 151304167 | 27051  | 1  | 0 | 11 | 0         | 0.05740087 | 0 | 14 | 0          | 0.5498098  |
| chr5 | 151304167 | 151328344 | 24178  | 2  | 0 | 11 | 0         | 0.03310993 | 0 | 15 | 0          | 0.71538971 |
| chr5 | 151328344 | 151328403 | 60     | 1  | 0 | 12 | 0         | 0.0565833  | 0 | 15 | 0          | 0.55190077 |
| chr5 | 151328403 | 151451354 | 122952 | 1  | 0 | 8  | 0         | 0.01767679 | 0 | 13 | 0          | 0.91308053 |
| chr5 | 151451354 | 151530718 | 79465  | 1  | 0 | 8  | 0         | 0.08923391 | 0 | 10 | 0          | 0.4167287  |
| chr5 | 151530718 | 151771598 | 240881 | 2  | 0 | 8  | 0         | 0.13872638 | 0 | 9  | 0          | 0.30102999 |
| chr5 | 151771598 | 152026494 | 254897 | 2  | 0 | 8  | 0         | 0.04875589 | 0 | 9  | 0          | 0.5732208  |
| chr5 | 152026494 | 152140747 | 114254 | 2  | 0 | 8  | 0         | 0.08923391 | 0 | 10 | 0          | 0.4167287  |
| chr5 | 152140747 | 152140806 | 60     | 1  | 0 | 8  | 0         | 0.05490675 | 0 | 11 | 0          | 0.55623409 |
| chr5 | 152140806 | 152335779 | 194974 | 2  | 0 | 6  | 0         | 0.08122616 | 0 | 8  | 0          | 0.4250187  |
| chr5 | 152335779 | 152335838 | 60     | 1  | 0 | 7  | 0         | 0.08584816 | 0 | 9  | 0          | 0.42015402 |
| chr5 | 152335838 | 152448325 | 112488 | 1  | 0 | 5  | 0         | 0.04407651 | 0 | 8  | 0          | 0.58747015 |
| chr5 | 152448325 | 152639569 | 191245 | 4  | 0 | 4  | 0         | 0.02074938 | 0 | 8  | 0          | 0.79906872 |
| chr5 | 152639569 | 152639628 | 60     | 1  | 0 | 5  | 0         | 0.01320236 | 0 | 10 | 0          | 0.97390707 |
| chr5 | 152639628 | 152873470 | 233843 | 2  | 0 | 5  | 0         | 0.02473314 | 0 | 9  | 0          | 0.76806864 |
| chr5 | 152873470 | 152951731 | 78262  | 2  | 0 | 6  | 0         | 0.00778066 | 1 | 12 | 0.30102999 | 1.17038931 |
| chr5 | 152951731 | 153134583 | 182853 | 3  | 0 | 6  | 0         | 0.00778066 | 0 | 12 | 0          | 1.17038931 |
| chr5 | 153134583 | 153361800 | 227218 | 3  | 0 | 6  | 0         | 0.01518174 | 0 | 11 | 0          | 0.9449689  |
| chr5 | 153361800 | 153630341 | 268542 | 6  | 0 | 6  | 0         | 0.00778066 | 0 | 12 | 0          | 1.17038931 |
| chr5 | 153630341 | 153735212 | 104072 | 2  | 0 | 5  | 0         | 0.00317045 | 0 | 12 | 0          | 1.46403142 |
| chr5 | 153735212 | 153856715 | 121504 | 6  | 0 | 6  | 0         | 0.00778066 | 0 | 12 | 0          | 1.17038931 |
| chr5 | 153856715 | 154051814 | 195100 | 2  | 0 | 6  | 0         | 0.01518174 | 0 | 7  | 0          | 0.5449689  |
| chr5 | 154051814 | 154130623 | 78810  | 2  | 0 | 6  | 0         | 0.1299313  | 0 | 7  | 0          | 0.30102999 |
| chr5 | 154130623 | 154130682 | 60     | 1  | 0 | 6  | 0         | 0.04875589 | 0 | 9  | 0          | 0.5732208  |
| chr5 | 154130682 | 154251303 | 120622 | 4  | 0 | 3  | 0         | 0.01598258 | 0 | 7  | 0          | 0.84395715 |
| chr5 | 154251303 | 154287403 | 36101  | 3  | 0 | 4  | 0         | 0.03812622 | 0 | 7  | 0          | 0.60763643 |
| chr5 | 154287403 | 154364775 | 77373  | 3  | 0 | 2  | 0         | 0.00493743 | 0 | 7  | 0          | 1.16581773 |
| chr5 | 154364775 | 154433622 | 68848  | 2  | 0 | 3  | 0         | 0.01598258 | 0 | 7  | 0          | 0.84395715 |
| chr5 | 154433622 | 154821114 | 387493 | 2  | 0 | 1  | 0         | 0.00204627 | 0 | 6  | 0          | 1.31360226 |
| chr5 | 154821114 | 154821173 | 60     | 1  | 0 | 3  | 0         | 0.01598258 | 1 | 7  | 0.30102999 | 0.84395715 |
| chr5 | 154821173 | 154886233 | 65061  | 1  | 0 | 2  | 0         | 0.02162467 | 1 | 5  | 0.30102999 | 0.68214471 |
| chr5 | 154886233 | 155217429 | 331197 | 2  | 0 | 2  | 0         | 0.0429175  | 0 | 4  | 0.30102999 | 0.47744371 |
| chr5 | 155217429 | 155217488 | 60     | 1  | 0 | 2  | 0         | 0.01053319 | 1 | 6  | 0.30102999 | 0.91219088 |
| chr5 | 155217488 | 155312750 | 95263  | 1  | 0 | 2  | 0         | 0.02162467 | 0 | 5  | 0.30102999 | 0.68214471 |
| chr5 | 155312750 | 155312809 | 60     | 1  | 0 | 2  | 0         | 0.01053319 | 1 | 6  | 0.30102999 | 0.91219088 |
| chr5 | 155312809 | 155471543 | 158735 | 2  | 0 | 1  | 0         | 0.00478973 | 1 | 5  | 0.30102999 | 1.02643191 |
| chr5 | 155471543 | 155702760 | 231218 | 3  | 0 | 1  | 0         | 0.01091641 | 1 | 4  | 0.30102999 | 0.76005302 |
| chr5 | 155702760 | 155771638 | 68879  | 2  | 0 | 1  | 0         | 0.00478973 | 1 | 5  | 0.30102999 | 1.02643191 |
| chr5 | 155771638 | 155771694 | 57     | 1  | 0 | 2  | 0         | 0.02162467 | 1 | 5  | 0.30102999 | 0.68214471 |
| chr5 | 155771694 | 155874457 | 102764 | 2  | 0 | 2  | 0         | 0.0429175  | 1 | 4  | 0.30102999 | 0.47744371 |
| chr5 | 155874457 | 155874516 | 60     | 1  | 0 | 3  | 0         | 0.00378107 | 1 | 9  | 0.30102999 | 1.3311237  |
| chr5 | 155874516 | 156016255 | 141740 | 2  | 0 | 3  | 0         | 0.0079614  | 1 | 8  | 0.30102999 | 1.07548421 |
| chr5 | 156016255 | 156016313 | 59     | 1  | 0 | 4  | 0         | 0.02074938 | 0 | 8  | 0.30102999 | 0.79906872 |
| chr5 | 156016313 | 156126541 | 110229 | 2  | 0 | 4  | 0         | 0.03812622 | 1 | 7  | 0.30102999 | 0.60763643 |
| chr5 | 156126541 | 156187836 | 61296  | 2  | 0 | 4  | 0         | 0.02074938 | 0 | 8  | 0.30102999 | 0.79906872 |
| chr5 | 156187836 | 156696416 | 508581 | 13 | 0 | 5  | 0         | 0.04407651 | 1 | 8  | 0.30102999 | 0.58747015 |
| chr5 | 156696416 | 156822261 | 125846 | 4  | 0 | 5  | 0         | 0.07511598 | 1 | 7  | 0.30102999 | 0.43181735 |
| chr5 | 156822261 | 156904492 | 82232  | 3  | 0 | 5  | 0         | 0.04407651 | 1 | 8  | 0.30102999 | 0.58747015 |
| chr5 | 156904492 | 157105233 | 200742 | 5  | 0 | 5  | 0         | 0.12309572 | 1 | 6  | 0.30102999 | 0.30102999 |
| chr5 | 157105233 | 157105292 | 60     | 1  | 0 | 5  | 0         | 0.07511598 | 1 | 7  | 0.30102999 | 0.43181735 |
| chr5 | 157105292 | 157216337 | 111046 | 5  | 0 | 5  | 0         | 0.12309572 | 1 | 6  | 0.30102999 | 0.30102999 |
| chr5 | 157216337 | 157368536 | 152200 | 5  | 0 | 5  | 0         | 0.07511598 | 1 | 7  | 0.30102999 | 0.43181735 |
| chr5 | 157368536 | 157455904 | 87369  | 2  | 0 | 5  | 0         | 0.04407651 | 1 | 8  | 0.30102999 | 0.58747015 |
| chr5 | 157455904 | 157455963 | 60     | 1  | 1 | 5  | 0.1218695 | 0.04407651 | 0 | 8  | 0.1218695  | 0.5874     |



|      |           |           |        |   |   |   |   |            |   |    |            |            |
|------|-----------|-----------|--------|---|---|---|---|------------|---|----|------------|------------|
| chr5 | 160278828 | 160461919 | 183092 | 1 | 0 | 5 | 0 | 0.00317045 | 0 | 12 | 0          | 1.46403142 |
| chr5 | 160461919 | 160622747 | 160829 | 1 | 0 | 5 | 0 | 0.01320236 | 0 | 10 | 0          | 0.97390707 |
| chr5 | 160622747 | 160720878 | 98132  | 2 | 0 | 6 | 0 | 0.02793176 | 0 | 10 | 0          | 0.74627054 |
| chr5 | 160720878 | 160765376 | 44499  | 2 | 0 | 7 | 0 | 0.05232577 | 0 | 10 | 0          | 0.56314362 |
| chr5 | 160765376 | 160827300 | 61925  | 1 | 0 | 5 | 0 | 0.02473314 | 0 | 9  | 0          | 0.76806864 |
| chr5 | 160827300 | 160914332 | 87033  | 2 | 0 | 5 | 0 | 0.04407651 | 0 | 8  | 0          | 0.58747015 |
| chr5 | 160914332 | 161028885 | 114554 | 2 | 0 | 5 | 0 | 0.07511598 | 0 | 7  | 0          | 0.43181735 |
| chr5 | 161028885 | 161116093 | 87209  | 2 | 0 | 5 | 0 | 0.04407651 | 0 | 8  | 0          | 0.58747015 |
| chr5 | 161116093 | 161166374 | 50282  | 3 | 0 | 5 | 0 | 0.02473314 | 0 | 9  | 0          | 0.76806864 |
| chr5 | 161166374 | 161166433 | 60     | 1 | 0 | 6 | 0 | 0.04875589 | 0 | 9  | 0          | 0.5732208  |
| chr5 | 161166433 | 161658087 | 491655 | 8 | 0 | 5 | 0 | 0.04407651 | 0 | 8  | 0          | 0.58747015 |
| chr5 | 161658087 | 161658146 | 60     | 1 | 0 | 6 | 0 | 0.08122616 | 0 | 8  | 0          | 0.4250187  |
| chr5 | 161658146 | 161880865 | 222720 | 1 | 0 | 5 | 0 | 0.12309572 | 0 | 6  | 0          | 0.30102999 |
| chr5 | 161880865 | 161929256 | 48392  | 2 | 0 | 5 | 0 | 0.12309572 | 1 | 6  | 0.30102999 | 0.30102999 |
| chr5 | 161929256 | 162031937 | 102682 | 2 | 0 | 8 | 0 | 0.20764654 | 1 | 8  | 0.30102999 | 0.20764654 |
| chr5 | 162031937 | 162223207 | 191271 | 1 | 0 | 7 | 0 | 0.13499366 | 1 | 8  | 0.30102999 | 0.30102999 |
| chr5 | 162223207 | 16223266  | 60     | 1 | 0 | 8 | 0 | 0.20764654 | 1 | 8  | 0.30102999 | 0.20764654 |
| chr5 | 16223266  | 162373422 | 150157 | 1 | 0 | 4 | 0 | 0.06713722 | 1 | 6  | 0.30102999 | 0.44141547 |
| chr5 | 162373422 | 162688104 | 314683 | 2 | 0 | 3 | 0 | 0.05670724 | 1 | 5  | 0.30102999 | 0.45545077 |
| chr5 | 162688104 | 162688163 | 60     | 1 | 0 | 4 | 0 | 0.11390336 | 1 | 5  | 0.30102999 | 0.30102999 |
| chr5 | 162688163 | 16285689  | 187527 | 7 | 0 | 3 | 0 | 0.05707724 | 1 | 5  | 0.30102999 | 0.45545077 |
| chr5 | 16285689  | 163163839 | 278151 | 7 | 0 | 5 | 0 | 0.03070643 | 0 | 6  | 0.30102999 | 0.63695542 |
| chr5 | 163163839 | 163813766 | 649928 | 6 | 0 | 5 | 0 | 0.12309572 | 1 | 6  | 0.30102999 | 0.30102999 |
| chr5 | 163813766 | 163910547 | 96782  | 1 | 0 | 2 | 0 | 0.0429175  | 1 | 4  | 0.30102999 | 0.47744371 |
| chr5 | 163910547 | 164166144 | 255598 | 3 | 0 | 0 | 0 | 0          | 1 | 4  | 0.30102999 | 1.26272838 |
| chr5 | 164166144 | 164166203 | 60     | 1 | 0 | 1 | 0 | 0.01091641 | 1 | 4  | 0.30102999 | 0.76005302 |
| chr5 | 164166203 | 164828290 | 662088 | 5 | 0 | 1 | 0 | 0.01091641 | 0 | 4  | 0          | 0.76005302 |
| chr5 | 164828290 | 164828349 | 60     | 1 | 0 | 2 | 0 | 0.0429175  | 0 | 4  | 0          | 0.47744371 |
| chr5 | 164828349 | 164973086 | 144738 | 1 | 0 | 2 | 0 | 0.08289318 | 0 | 3  | 0          | 0.30102999 |
| chr5 | 164973086 | 165212295 | 239210 | 2 | 0 | 0 | 0 | 0          | 0 | 1  | 0          | 0.30102999 |
| chr5 | 165212295 | 165402101 | 189807 | 2 | 0 | 0 | 0 | 0          | 0 | 2  | 0          | 0.61140001 |
| chr5 | 165402101 | 166125609 | 357297 | 3 | 0 | 1 | 0 | 0.05404976 | 0 | 2  | 0          | 0.30102999 |
| chr5 | 166125609 | 166385157 | 295949 | 2 | 0 | 5 | 0 | 0.45545077 | 0 | 3  | 0          | 0.05670724 |
| chr5 | 166385157 | 166719422 | 334266 | 3 | 0 | 5 | 0 | 0.45545077 | 1 | 3  | 0.30102999 | 0.05670724 |
| chr5 | 166719422 | 166798936 | 79515  | 2 | 0 | 5 | 0 | 0.30102999 | 1 | 4  | 0.30102999 | 0.11390336 |
| chr5 | 166798936 | 166798995 | 60     | 1 | 0 | 6 | 0 | 0.30102999 | 1 | 5  | 0.30102999 | 0.12309572 |
| chr5 | 166798995 | 166844073 | 45079  | 1 | 0 | 6 | 0 | 0.44141547 | 1 | 4  | 0.30102999 | 0.06713722 |
| chr5 | 166844073 | 166891389 | 47317  | 2 | 0 | 6 | 0 | 0.30102999 | 1 | 5  | 0.30102999 | 0.12309572 |
| chr5 | 166891389 | 166951793 | 60405  | 1 | 0 | 6 | 0 | 0.44141547 | 1 | 4  | 0.30102999 | 0.06713722 |
| chr5 | 166951793 | 167021249 | 69457  | 2 | 0 | 6 | 0 | 0.30102999 | 1 | 5  | 0.30102999 | 0.12309572 |
| chr5 | 167021249 | 167150012 | 128764 | 3 | 0 | 6 | 0 | 0.20064824 | 1 | 6  | 0.30102999 | 0.20064824 |
| chr5 | 167150012 | 167267486 | 117475 | 3 | 0 | 6 | 0 | 0.129913   | 1 | 7  | 0.30102999 | 0.30102999 |
| chr5 | 167267486 | 167361258 | 93773  | 2 | 0 | 6 | 0 | 0.20064824 | 1 | 6  | 0.30102999 | 0.20064824 |
| chr5 | 167361258 | 167565005 | 203748 | 5 | 0 | 6 | 0 | 0.129913   | 1 | 7  | 0.30102999 | 0.30102999 |
| chr5 | 167565005 | 167666325 | 101321 | 3 | 0 | 7 | 0 | 0.20469099 | 1 | 7  | 0.30102999 | 0.20469099 |
| chr5 | 167666325 | 167706507 | 40183  | 2 | 0 | 8 | 0 | 0.20764654 | 1 | 8  | 0.61140001 | 0.20764654 |
| chr5 | 167706507 | 167982982 | 276476 | 7 | 0 | 8 | 0 | 0.30102999 | 2 | 7  | 0.61140001 | 0.13499366 |
| chr5 | 167982982 | 168011390 | 28409  | 1 | 0 | 8 | 0 | 0.30102999 | 1 | 7  | 0.30102999 | 0.13499366 |
| chr5 | 168011390 | 168165013 | 153624 | 2 | 0 | 7 | 0 | 0.20469099 | 1 | 7  | 0.30102999 | 0.20469099 |
| chr5 | 168165013 | 168317542 | 152530 | 5 | 0 | 8 | 0 | 0.30102999 | 1 | 7  | 0.30102999 | 0.13499366 |
| chr5 | 168317542 | 168490985 | 173444 | 4 | 0 | 7 | 0 | 0.20469099 | 1 | 7  | 0.30102999 | 0.20469099 |
| chr5 | 168490985 | 168491044 | 60     | 1 | 0 | 8 | 0 | 0.30102999 | 1 | 7  | 0.30102999 | 0.13499366 |
| chr5 | 168491044 | 168554764 | 63721  | 1 | 0 | 7 | 0 | 0.20469099 | 1 | 7  | 0.30102999 | 0.20469099 |
| chr5 | 168554764 | 168603478 | 48715  | 2 | 0 | 7 | 0 | 0.30102999 | 1 | 7  | 0.30102999 | 0.13499366 |
| chr5 | 168603478 | 168603537 | 60     | 1 | 0 | 8 | 0 | 0.20764654 | 1 | 8  | 0.30102999 | 0.20764654 |
| chr5 | 168603537 | 168693007 | 89471  | 3 | 0 | 6 | 0 | 0.129913   | 1 | 7  | 0.30102999 | 0.30102999 |
| chr5 | 168693007 | 168778608 | 85602  | 3 | 0 | 7 | 0 | 0.13499366 | 1 | 8  | 0.30102999 | 0.30102999 |
| chr5 | 168778608 | 168778667 | 60     | 1 | 0 | 8 | 0 | 0.20764654 | 1 | 8  | 0.30102999 | 0.20764654 |
| chr5 | 168778667 | 168983162 | 204496 | 1 | 0 | 7 | 0 | 0.30102999 | 1 | 6  | 0.30102999 | 0.129913   |
| chr5 | 168983162 | 168983221 | 60     | 1 | 0 | 7 | 0 | 0.30102999 | 2 | 6  | 0.61140001 | 0.129913   |
| chr5 | 168983221 | 169117384 | 134164 | 3 | 0 | 7 | 0 | 0.43181735 | 2 | 5  | 0.61140001 | 0.07511598 |
| chr5 | 169117384 | 169145700 | 28317  | 2 | 0 | 7 | 0 | 0.20469099 | 2 | 7  | 0.61140001 | 0.20469099 |
| chr5 | 169145700 | 169191047 | 45348  | 1 | 0 | 7 | 0 | 0.43181735 | 2 | 5  | 0.61140001 | 0.07511598 |
| chr5 | 169191047 | 169267734 | 76688  | 2 | 0 | 7 | 0 | 0.43181735 | 1 | 5  | 0.30102999 | 0.07511598 |
| chr5 | 169267734 | 169267784 | 51     | 1 | 0 | 7 | 0 | 0.30102999 | 1 | 6  | 0.30102999 | 0.129913   |
| chr5 | 169267784 | 169479290 | 211507 | 4 | 0 | 7 | 0 | 0.43181735 | 1 | 5  | 0.30102999 | 0.07511598 |
| chr5 | 169479290 | 169536555 | 57266  | 5 | 0 | 7 | 0 | 0.43181735 | 2 | 5  | 0.61140001 | 0.07511598 |
| chr5 | 169536555 | 169629965 | 93411  | 2 | 0 | 6 | 0 | 0.44141547 | 1 | 1  | 0.30102999 | 0.06713722 |
| chr5 | 169629965 | 169630023 | 59     | 1 | 0 | 7 | 0 | 0.30102999 | 1 | 6  | 0.30102999 | 0.129913   |
| chr5 | 169630023 | 169675170 | 45148  | 1 | 0 | 6 | 0 | 0.20064824 | 1 | 6  | 0.30102999 | 0.20064824 |
| chr5 | 169675170 | 169708041 | 32872  | 2 | 0 | 6 | 0 | 0.44141547 | 1 | 4  | 0.30102999 | 0.06713722 |
| chr5 | 169708041 | 169708085 | 45     | 1 | 0 | 6 | 0 | 0.30102999 | 2 | 5  | 0.61140001 | 0.12309572 |
| chr5 | 169708085 | 169763048 | 54964  | 1 | 0 | 6 | 0 | 0.44141547 | 1 | 4  | 0.30102999 | 0.06713722 |
| chr5 | 169763048 | 169849631 | 86584  | 4 | 0 | 6 | 0 | 0.30102999 | 1 | 5  | 0.30102999 | 0.12309572 |
| chr5 | 169849631 | 170109334 | 259704 | 6 | 0 | 8 | 0 | 0.58747015 | 2 | 5  | 0.61140001 | 0.04407651 |
| chr5 | 170109334 | 170214178 | 104845 | 2 | 0 | 7 | 0 | 0.43181735 | 1 | 5  | 0.30102999 | 0.07511598 |
| chr5 | 170214178 | 170214237 | 60     | 1 | 0 | 7 | 0 | 0.43181735 | 2 | 5  | 0.61140001 | 0.07511598 |
| chr5 | 170214237 | 170262676 | 48440  | 2 | 0 | 6 | 0 | 0.30102999 | 1 | 5  | 0.30102999 | 0.12309572 |
| chr5 | 170262676 | 170319564 | 56889  | 2 | 0 | 7 | 0 | 0.20469099 | 2 | 7  | 0.61140001 | 0.20469099 |
| chr5 | 170319564 | 170319623 | 60     | 1 | 0 | 7 | 0 | 0.20469099 | 3 | 7  | 0.93173516 | 0.20469099 |
| chr5 | 170319623 | 170470509 | 150887 | 3 | 0 | 6 | 0 | 0.20064824 | 3 | 6  | 0.93173516 | 0.20064824 |
| chr5 | 170470509 | 170496921 | 26413  | 1 | 0 | 6 | 0 | 0.44141547 | 3 | 4  | 0.93173516 | 0.06713722 |
| chr5 | 170496921 | 170570384 | 73464  | 1 | 0 | 5 | 0 | 0.30102999 | 2 | 6  | 0.61140001 | 0.11390336 |
| chr5 | 170570384 | 170570443 | 60     | 1 | 0 | 5 | 0 | 0.12309572 | 2 | 6  | 0.61140001 | 0.30102999 |
| chr5 | 170570443 | 170726981 | 156539 | 3 | 0 | 4 | 0 | 0.18734596 | 2 | 6  | 0.61140001 | 0.18734596 |
| chr5 | 170726981 | 170737914 | 10934  | 2 | 0 | 6 | 0 | 0.30102999 | 2 | 5  | 0.61140001 | 0.12309572 |
| chr5 | 170737914 | 170820185 | 82272  | 2 | 0 | 6 | 0 | 0.44141547 | 2 | 6  | 0.61140001 | 0.06713722 |
| chr5 | 170820185 | 170834717 | 14533  | 4 | 0 | 7 | 0 | 0.60763643 | 2 | 4  | 0.61140001 | 0.03812622 |
| chr5 | 170834717 | 170881134 | 46418  | 2 | 0 | 6 | 0 | 0.44141547 | 2 | 4  | 0.61140001 | 0.06713722 |
| chr5 | 170881134 | 170881185 | 52     | 1 | 0 | 7 | 0 | 0.60763643 | 2 | 4  | 0.61140001 | 0.03812622 |
| chr5 | 170881185 | 170963376 | 82192  | 1 | 0 | 7 | 0 | 0.84395715 | 2 | 3  | 0.61140001 | 0.01598258 |
| chr5 | 170963376 | 170963435 | 60     | 1 | 0 | 7 | 0 | 0.84395715 | 3 | 3  | 0.93173516 | 0.01598258 |
| chr5 | 170963435 | 171149889 | 186455 | 1 | 0 | 5 | 0 | 0.45545077 | 2 | 3  | 0.61140001 | 0.05670724 |
| chr5 | 171149889 | 171239417 | 89529  | 1 | 0 | 5 | 0 | 0.45545077 | 3 | 0  | 0.30102999 | 0.05670724 |
| chr5 | 171239417 | 171343555 | 104139 | 2 | 0 | 5 | 0 | 0.45545077 | 2 | 0  | 0          | 0.05670724 |
| chr5 | 171343555 | 171384561 | 41007  | 3 | 0 | 7 | 0 | 0.60763643 | 4 | 0  | 0          | 0.03812622 |
| chr5 | 171384561 | 17146990  |        |   |   |   |   |            |   |    |            |            |

|      |           |           |        |   |   |   |            |            |   |    |            |            |
|------|-----------|-----------|--------|---|---|---|------------|------------|---|----|------------|------------|
| chr5 | 173515045 | 173515104 | 60     | 1 | 0 | 5 | 0          | 0.68214471 | 0 | 2  | 0          | 0.02162467 |
| chr5 | 173515104 | 173534799 | 19696  | 1 | 0 | 3 | 0          | 0.51676182 | 0 | 1  | 0          | 0.02438896 |
| chr5 | 173534799 | 173656118 | 121320 | 1 | 0 | 2 | 0          | 0.30102999 | 0 | 1  | 0          | 0.05404976 |
| chr5 | 173656118 | 173656177 | 60     | 1 | 0 | 3 | 0          | 0.51676182 | 0 | 1  | 0          | 0.02438896 |
| chr5 | 173656177 | 173912734 | 265558 | 2 | 0 | 2 | 0          | 0.30102999 | 0 | 1  | 0          | 0.05404976 |
| chr5 | 173912734 | 173912793 | 60     | 1 | 0 | 4 | 0          | 0.30102999 | 0 | 3  | 0          | 0.10122019 |
| chr5 | 173912793 | 174034345 | 121553 | 1 | 0 | 3 | 0          | 0.17593012 | 0 | 3  | 0          | 0.17593012 |
| chr5 | 174034345 | 174034404 | 60     | 1 | 0 | 3 | 0          | 0.05670724 | 0 | 5  | 0          | 0.45545077 |
| chr5 | 174034404 | 174153419 | 119016 | 1 | 0 | 3 | 0          | 0.30102999 | 0 | 2  | 0          | 0.08289318 |
| chr5 | 174153419 | 174154900 | 1482   | 2 | 0 | 3 | 0          | 0.30102999 | 1 | 2  | 0.30102999 | 0.08289318 |
| chr5 | 174154900 | 174226486 | 71587  | 1 | 0 | 2 | 0          | 0.1575501  | 1 | 2  | 0.30102999 | 0.1575501  |
| chr5 | 174226486 | 174375130 | 148645 | 2 | 0 | 2 | 0          | 0.02162467 | 1 | 5  | 0.30102999 | 0.68214471 |
| chr5 | 174375130 | 174407546 | 32417  | 2 | 1 | 2 | 0.1218695  | 0.00493743 | 1 | 7  | 0.1218695  | 1.16581773 |
| chr5 | 174407546 | 174481609 | 74064  | 1 | 1 | 2 | 0.1218695  | 0.1055319  | 1 | 6  | 0.1218695  | 0.91219088 |
| chr5 | 174481609 | 174481668 | 60     | 1 | 1 | 3 | 0.1218695  | 0.30706543 | 1 | 6  | 0.1218695  | 0.63695542 |
| chr5 | 174481668 | 174849572 | 367905 | 2 | 1 | 2 | 0.30102999 | 0.08289318 | 2 | 3  | 0          | 0.30102999 |
| chr5 | 174849572 | 174868099 | 18528  | 2 | 1 | 3 | 0.30102999 | 0.1598258  | 2 | 7  | 0          | 0.84395715 |
| chr5 | 174868099 | 174954512 | 86414  | 3 | 1 | 3 | 0.30102999 | 0.05670724 | 3 | 5  | 0          | 0.45545077 |
| chr5 | 174954512 | 174954571 | 60     | 1 | 1 | 3 | 0.30102999 | 0.30706543 | 3 | 6  | 0          | 0.63695542 |
| chr5 | 174954571 | 175027689 | 73119  | 2 | 1 | 3 | 0.30102999 | 0.05670724 | 2 | 5  | 0          | 0.45545077 |
| chr5 | 175027689 | 175109981 | 82293  | 2 | 1 | 4 | 0.30102999 | 0.03812622 | 2 | 7  | 0          | 0.60763643 |
| chr5 | 175109981 | 175110040 | 60     | 1 | 1 | 4 | 0.30102999 | 0.07511598 | 1 | 7  | 0          | 0.43181735 |
| chr5 | 175110040 | 175225949 | 115910 | 2 | 1 | 4 | 0.30102999 | 0.03812622 | 2 | 7  | 0          | 0.60763643 |
| chr5 | 175225949 | 175226008 | 60     | 1 | 1 | 5 | 0.30102999 | 0.07511598 | 1 | 7  | 0          | 0.43181735 |
| chr5 | 175226008 | 175273482 | 47475  | 2 | 1 | 4 | 0.30102999 | 0.03812622 | 2 | 7  | 0          | 0.60763643 |
| chr5 | 175273482 | 175273541 | 60     | 1 | 1 | 5 | 0.30102999 | 0.07511598 | 1 | 7  | 0          | 0.43181735 |
| chr5 | 175273541 | 175437847 | 164307 | 2 | 1 | 4 | 0.30102999 | 0.03812622 | 2 | 7  | 0          | 0.60763643 |
| chr5 | 175437847 | 175437906 | 60     | 1 | 1 | 2 | 0.30102999 | 0.07511598 | 1 | 7  | 0.05404976 | 0.43181735 |
| chr5 | 175437906 | 175576602 | 138697 | 1 | 1 | 5 | 0.1218695  | 0.07511598 | 1 | 7  | 0.1218695  | 0.43181735 |
| chr5 | 175576602 | 175576661 | 60     | 1 | 1 | 6 | 0.1218695  | 0.08122616 | 1 | 8  | 0.1218695  | 0.4250187  |
| chr5 | 175576661 | 175719197 | 142537 | 1 | 1 | 6 | 0.1218695  | 0.129913   | 1 | 7  | 0.1218695  | 0.30102999 |
| chr5 | 175719197 | 175719256 | 60     | 1 | 1 | 7 | 0.05404976 | 0.20469099 | 2 | 7  | 0.30102999 | 0.20469099 |
| chr5 | 175719256 | 175775326 | 56071  | 1 | 1 | 6 | 0.05404976 | 0.129913   | 2 | 7  | 0.30102999 | 0.30102999 |
| chr5 | 175775326 | 175779383 | 4058   | 2 | 3 | 6 | 0.30102999 | 0.129913   | 2 | 7  | 0.08289318 | 0.30102999 |
| chr5 | 175779383 | 175793937 | 14555  | 3 | 3 | 7 | 0.30102999 | 0.20469099 | 2 | 7  | 0.08289318 | 0.20469099 |
| chr5 | 175793937 | 175816210 | 22274  | 1 | 2 | 7 | 0.1575501  | 0.20469099 | 2 | 7  | 0.1575501  | 0.20469099 |
| chr5 | 175816210 | 175890496 | 74287  | 3 | 1 | 7 | 0.05404976 | 0.20469099 | 2 | 7  | 0.30102999 | 0.20469099 |
| chr5 | 175890496 | 175890555 | 60     | 1 | 1 | 7 | 0.30102999 | 0.20469099 | 2 | 7  | 0.08289318 | 0.20469099 |
| chr5 | 175890555 | 175936428 | 45874  | 1 | 3 | 6 | 0.30102999 | 0.129913   | 2 | 7  | 0.08289318 | 0.30102999 |
| chr5 | 175936428 | 175936487 | 60     | 1 | 5 | 6 | 0.45545077 | 0.04875589 | 3 | 9  | 0.05670724 | 0.5732208  |
| chr5 | 175936487 | 175974728 | 38242  | 2 | 5 | 5 | 0.45545077 | 0.02473314 | 3 | 9  | 0.05670724 | 0.76806864 |
| chr5 | 175974728 | 176013026 | 38299  | 2 | 5 | 5 | 0.45545077 | 0.01320236 | 3 | 10 | 0.05670724 | 0.97390707 |
| chr5 | 176013026 | 176033642 | 20617  | 2 | 5 | 5 | 0.45545077 | 0.02473314 | 3 | 9  | 0.05670724 | 0.76806864 |
| chr5 | 176033642 | 176033692 | 51     | 1 | 5 | 6 | 0.45545077 | 0.02793176 | 3 | 10 | 0.05670724 | 0.74627054 |
| chr5 | 176033692 | 176056299 | 22608  | 2 | 4 | 6 | 0.30102999 | 0.02793176 | 3 | 10 | 0.10122019 | 0.74627054 |
| chr5 | 176056299 | 176127129 | 70831  | 1 | 4 | 6 | 0.30102999 | 0.04875589 | 3 | 9  | 0.10122019 | 0.5732208  |
| chr5 | 176127129 | 176178201 | 51073  | 2 | 4 | 7 | 0.30102999 | 0.08584816 | 3 | 9  | 0.10122019 | 0.42015402 |
| chr5 | 176178201 | 176267486 | 89286  | 1 | 3 | 5 | 0.30102999 | 0.12309572 | 2 | 6  | 0.08289318 | 0.30102999 |
| chr5 | 176267486 | 176309698 | 42213  | 1 | 3 | 5 | 0.30102999 | 0.19510895 | 2 | 5  | 0.08289318 | 0.19510895 |
| chr5 | 176309698 | 176309749 | 52     | 1 | 4 | 5 | 0.47744371 | 0.19510895 | 2 | 5  | 0.0429175  | 0.19510895 |
| chr5 | 176309749 | 176311879 | 2131   | 1 | 3 | 5 | 0.30102999 | 0.19510895 | 2 | 5  | 0.08289318 | 0.19510895 |
| chr5 | 176311879 | 176409575 | 97697  | 4 | 3 | 5 | 0.30102999 | 0.12309572 | 6 | 6  | 0.08289318 | 0.30102999 |
| chr5 | 176409575 | 176409634 | 60     | 1 | 4 | 5 | 0.47744371 | 0.12309572 | 6 | 6  | 0.0429175  | 0.30102999 |
| chr5 | 176409634 | 176433008 | 23375  | 1 | 3 | 5 | 0.30102999 | 0.12309572 | 2 | 6  | 0.08289318 | 0.30102999 |
| chr5 | 176433008 | 176488608 | 55601  | 2 | 3 | 5 | 0.30102999 | 0.07511598 | 2 | 7  | 0.08289318 | 0.43181735 |
| chr5 | 176488608 | 176516236 | 27629  | 3 | 5 | 5 | 0.68214471 | 0.04407651 | 2 | 8  | 0.02162467 | 0.58747015 |
| chr5 | 176516236 | 176563025 | 46790  | 1 | 4 | 5 | 0.47744371 | 0.04407651 | 2 | 8  | 0.0429175  | 0.58747015 |
| chr5 | 176563025 | 176637907 | 74883  | 2 | 4 | 5 | 0.47744371 | 0.07511598 | 2 | 7  | 0.0429175  | 0.43181735 |
| chr5 | 176637907 | 176637966 | 60     | 1 | 4 | 6 | 0.47744371 | 0.04875589 | 2 | 9  | 0.0429175  | 0.5732208  |
| chr5 | 176637966 | 176662911 | 24946  | 1 | 3 | 6 | 0.30102999 | 0.04875589 | 2 | 9  | 0.08289318 | 0.5732208  |
| chr5 | 176662911 | 176729171 | 66261  | 1 | 3 | 6 | 0.30102999 | 0.08122616 | 2 | 8  | 0.08289318 | 0.4250187  |
| chr5 | 176729171 | 176776603 | 47433  | 3 | 4 | 6 | 0.30102999 | 0.08122616 | 3 | 8  | 0.10122019 | 0.4250187  |
| chr5 | 176776603 | 176776662 | 60     | 1 | 4 | 6 | 0.30102999 | 0.04875589 | 3 | 9  | 0.10122019 | 0.5732208  |
| chr5 | 176776662 | 176816297 | 39636  | 2 | 3 | 6 | 0.17593012 | 0.04875589 | 3 | 9  | 0.17593012 | 0.5732208  |
| chr5 | 176816297 | 176866053 | 49757  | 3 | 6 | 6 | 0.17593012 | 0.08122616 | 3 | 8  | 0.17593012 | 0.4250187  |
| chr5 | 176866053 | 176883273 | 17223  | 2 | 3 | 6 | 0.17593012 | 0.04875589 | 3 | 9  | 0.17593012 | 0.5732208  |
| chr5 | 176883273 | 176904798 | 21524  | 2 | 3 | 5 | 0.30102999 | 0.02473314 | 2 | 6  | 0.08289318 | 0.76806864 |
| chr5 | 176904798 | 177013902 | 109105 | 2 | 3 | 5 | 0.30102999 | 0.07511598 | 2 | 7  | 0.08289318 | 0.43181735 |
| chr5 | 177013902 | 177013961 | 60     | 1 | 3 | 5 | 0.30102999 | 0.04407651 | 2 | 8  | 0.08289318 | 0.58747015 |
| chr5 | 177013961 | 177107471 | 93511  | 2 | 3 | 5 | 0.30102999 | 0.07511598 | 2 | 7  | 0.08289318 | 0.43181735 |
| chr5 | 177107471 | 177297107 | 189637 | 2 | 3 | 5 | 0.30102999 | 0.12309572 | 2 | 6  | 0.08289318 | 0.30102999 |
| chr5 | 177297107 | 177421886 | 124780 | 2 | 2 | 5 | 0.1575501  | 0.12309572 | 2 | 6  | 0.1575501  | 0.30102999 |
| chr5 | 177421886 | 177422760 | 875    | 2 | 2 | 5 | 0.17593012 | 0.12309572 | 3 | 6  | 0.17593012 | 0.30102999 |
| chr5 | 177422760 | 177537467 | 114708 | 2 | 2 | 5 | 0.1575501  | 0.12309572 | 2 | 6  | 0.1575501  | 0.30102999 |
| chr5 | 177537467 | 177569245 | 31779  | 2 | 2 | 5 | 0.1575501  | 0.07511598 | 2 | 7  | 0.1575501  | 0.43181735 |
| chr5 | 177569245 | 17756155  | 186911 | 8 | 2 | 6 | 0.1575501  | 0.129913   | 2 | 7  | 0.1575501  | 0.30102999 |
| chr5 | 17756155  | 177832393 | 76239  | 2 | 2 | 6 | 0.1575501  | 0.08122616 | 2 | 8  | 0.1575501  | 0.4250187  |
| chr5 | 177832393 | 177832452 | 60     | 1 | 3 | 6 | 0.30102999 | 0.08122616 | 2 | 8  | 0.08289318 | 0.4250187  |
| chr5 | 177832452 | 177870827 | 38376  | 1 | 2 | 6 | 0.1575501  | 0.129913   | 2 | 7  | 0.1575501  | 0.30102999 |
| chr5 | 177870827 | 177870886 | 60     | 1 | 2 | 7 | 0.1575501  | 0.20469099 | 1 | 6  | 0.1575501  | 0.20469099 |
| chr5 | 177870886 | 177913026 | 42141  | 1 | 2 | 7 | 0.30102999 | 0.30102999 | 1 | 6  | 0.05404976 | 0.129913   |
| chr5 | 177913026 | 177956938 | 43913  | 1 | 2 | 6 | 0.30102999 | 0.30102999 | 1 | 5  | 0.05404976 | 0.12309572 |
| chr5 | 177956938 | 178038828 | 81891  | 1 | 2 | 6 | 0.30102999 | 0.44141547 | 1 | 4  | 0.05404976 | 0.06713722 |
| chr5 | 178038828 | 178078984 | 40157  | 3 | 2 | 6 | 0.30102999 | 0.30102999 | 1 | 5  | 0.05404976 | 0.12309572 |
| chr5 | 178078984 | 178079043 | 60     | 1 | 2 | 6 | 0.30102999 | 0.2064824  | 1 | 6  | 0.05404976 | 0.2064824  |
| chr5 | 178079043 | 178177337 | 98295  | 2 | 2 | 6 | 0.30102999 | 0.30102999 | 1 | 5  | 0.05404976 | 0.12309572 |
| chr5 | 178177337 | 178231925 | 54589  | 2 | 2 | 6 | 0.1575501  | 0.2064824  | 2 | 6  | 0.1575501  | 0.2064824  |
| chr5 | 178231925 | 178231984 | 60     | 1 | 2 | 6 | 0.1575501  | 0.04875589 | 2 | 9  | 0.1575501  | 0.5732208  |
| chr5 | 178231984 | 178290142 | 58159  | 1 | 2 | 6 | 0.30102999 | 0.04875589 | 1 | 9  | 0.05404976 | 0.5732208  |
| chr5 | 178290142 | 178290201 | 60     | 1 | 2 | 7 | 0.30102999 | 0.03037338 | 1 | 11 | 0.05404976 | 0.73110763 |
| chr5 | 178290201 | 178358506 | 68306  | 1 | 2 | 6 | 0.30102999 | 0.01518174 | 1 | 11 | 0.05404976 | 0.9449689  |
| chr5 | 178358506 | 178392976 | 3      |   |   |   |            |            |   |    |            |            |

|      |           |           |        |   |    |   |            |            |   |    |            |            |
|------|-----------|-----------|--------|---|----|---|------------|------------|---|----|------------|------------|
| chr5 | 179878423 | 179922418 | 43996  | 2 | 2  | 5 | 0.1575501  | 0.02473314 | 2 | 9  | 0.1575501  | 0.76806864 |
| chr5 | 179922418 | 180031741 | 109324 | 4 | 2  | 6 | 0.1575501  | 0.02793176 | 2 | 10 | 0.1575501  | 0.74627054 |
| chr5 | 180031741 | 180040671 | 8931   | 1 | 2  | 6 | 0.1575501  | 0.04875589 | 2 | 9  | 0.1575501  | 0.5732208  |
| chr5 | 180040671 | 180075444 | 34774  | 1 | 2  | 5 | 0.1575501  | 0.04407651 | 2 | 8  | 0.1575501  | 0.58747015 |
| chr5 | 180075444 | 180152467 | 77024  | 2 | 2  | 5 | 0.1575501  | 0.02473314 | 2 | 9  | 0.1575501  | 0.76806864 |
| chr5 | 180152467 | 180235736 | 83270  | 3 | 2  | 5 | 0.1575501  | 0.04407651 | 2 | 8  | 0.1575501  | 0.58747015 |
| chr5 | 180235736 | 180481959 | 246224 | 2 | 2  | 4 | 0.30102999 | 0.06713722 | 1 | 6  | 0.05404976 | 0.44141547 |
| chr5 | 180481959 | 180482018 | 60     | 1 | 2  | 5 | 0.30102999 | 0.12309572 | 1 | 6  | 0.05404976 | 0.30102999 |
| chr5 | 180482018 | 180487584 | 5567   | 2 | 2  | 5 | 0.30102999 | 0.19510895 | 1 | 5  | 0.05404976 | 0.19510895 |
| chr5 | 180487584 | 180487643 | 60     | 1 | 2  | 5 | 0.30102999 | 0.12309572 | 1 | 6  | 0.05404976 | 0.30102999 |
| chr5 | 180487643 | 180552404 | 64762  | 1 | 1  | 4 | 0.1218695  | 0.06713722 | 1 | 6  | 0.1218695  | 0.44141547 |
| chr5 | 180552404 | 180626328 | 73925  | 2 | 1  | 4 | 0.1218695  | 0.11390336 | 1 | 5  | 0.1218695  | 0.30102999 |
| chr5 | 180626328 | 180652442 | 26115  | 2 | 1  | 4 | 0.1218695  | 0.06713722 | 1 | 6  | 0.1218695  | 0.44141547 |
| chr5 | 180652442 | 180684501 | 32600  | 1 | 0  | 4 | 0          | 0.06713722 | 1 | 6  | 0.30102999 | 0.44141547 |
| chr6 | 170426    | 255350    | 84925  | 2 | 2  | 0 | 0.08289318 | 0          | 3 | 1  | 0.30102999 | 0.30102999 |
| chr6 | 255350    | 588213    | 332864 | 7 | 3  | 0 | 0.10122019 | 0          | 4 | 2  | 0.30102999 | 0.61140001 |
| chr6 | 588213    | 732288    | 144076 | 3 | 2  | 0 | 0.08289318 | 0          | 3 | 2  | 0.30102999 | 0.61140001 |
| chr6 | 732288    | 980386    | 248099 | 5 | 3  | 0 | 0.10122019 | 0          | 4 | 2  | 0.30102999 | 0.61140001 |
| chr6 | 980386    | 1057094   | 76709  | 2 | 3  | 0 | 0.05670724 | 0          | 5 | 2  | 0.45545077 | 0.61140001 |
| chr6 | 1057094   | 1057153   | 60     | 1 | 4  | 0 | 0.11390336 | 0          | 5 | 2  | 0.30102999 | 0.61140001 |
| chr6 | 1057153   | 1106749   | 49587  | 1 | 4  | 0 | 0.05670724 | 0          | 5 | 2  | 0.45545077 | 0.61140001 |
| chr6 | 1106749   | 1369777   | 263029 | 2 | 4  | 0 | 0.03070643 | 0          | 6 | 2  | 0.63695542 | 0.61140001 |
| chr6 | 1369777   | 1470685   | 100909 | 2 | 4  | 0 | 0.02074938 | 0          | 8 | 2  | 0.79906872 | 0.61140001 |
| chr6 | 1470685   | 1691836   | 221152 | 3 | 4  | 0 | 0          | 0          | 7 | 2  | 0.60763643 | 0.61140001 |
| chr6 | 1691836   | 1911795   | 219960 | 4 | 3  | 0 | 0.01598258 | 0          | 7 | 2  | 0.84395715 | 0.61140001 |
| chr6 | 1911795   | 1911854   | 60     | 1 | 3  | 1 | 0.01598258 | 0.05404976 | 7 | 2  | 0.84395715 | 0.30102999 |
| chr6 | 1911854   | 1960845   | 48992  | 1 | 3  | 0 | 0.01598258 | 0          | 7 | 2  | 0.84395715 | 0.61140001 |
| chr6 | 1960845   | 1960904   | 60     | 1 | 4  | 0 | 0.03812622 | 0          | 7 | 2  | 0.60763643 | 0.61140001 |
| chr6 | 1960904   | 2155812   | 194909 | 4 | 4  | 0 | 0.06713722 | 0          | 6 | 2  | 0.44141547 | 0.61140001 |
| chr6 | 2155812   | 232459    | 76648  | 3 | 0  | 0 | 0.03070643 | 0          | 6 | 2  | 0.63695542 | 0.61140001 |
| chr6 | 232459    | 2308517   | 76059  | 2 | 3  | 1 | 0.03070643 | 0.05404976 | 6 | 2  | 0.63695542 | 0.30102999 |
| chr6 | 2308517   | 2380300   | 71784  | 1 | 2  | 1 | 0.01053319 | 0.05404976 | 6 | 2  | 0.91219088 | 0.30102999 |
| chr6 | 2380300   | 2435118   | 54819  | 2 | 3  | 1 | 0.03070643 | 0.05404976 | 6 | 2  | 0.63695542 | 0.30102999 |
| chr6 | 2435118   | 2516240   | 81123  | 1 | 3  | 1 | 0.05670724 | 0.05404976 | 5 | 2  | 0.45545077 | 0.30102999 |
| chr6 | 2516240   | 2634208   | 117969 | 3 | 4  | 1 | 0.11390336 | 0.05404976 | 5 | 2  | 0.30102999 | 0.30102999 |
| chr6 | 2634208   | 2893856   | 259649 | 6 | 4  | 1 | 0.06713722 | 0.05404976 | 6 | 2  | 0.44141547 | 0.30102999 |
| chr6 | 2893856   | 2977261   | 83406  | 1 | 4  | 1 | 0.06713722 | 0.1218695  | 6 | 1  | 0.44141547 | 0.1218695  |
| chr6 | 2977261   | 2977320   | 60     | 1 | 5  | 1 | 0.12309572 | 0.1218695  | 6 | 1  | 0.30102999 | 0.1218695  |
| chr6 | 2977320   | 3153933   | 176614 | 3 | 5  | 0 | 0.19510895 | 0          | 5 | 1  | 0.19510895 | 0.30102999 |
| chr6 | 3153933   | 3153992   | 60     | 1 | 5  | 0 | 0.07511598 | 0          | 7 | 1  | 0.43181735 | 0.30102999 |
| chr6 | 3153992   | 3224544   | 70553  | 2 | 5  | 0 | 0.19510895 | 0          | 5 | 1  | 0.19510895 | 0.30102999 |
| chr6 | 3224544   | 3224603   | 60     | 1 | 5  | 1 | 0.12309572 | 0.1218695  | 6 | 1  | 0.30102999 | 0.1218695  |
| chr6 | 3224603   | 3290680   | 66078  | 1 | 5  | 0 | 0.19510895 | 0          | 5 | 1  | 0.19510895 | 0.30102999 |
| chr6 | 3290680   | 3369564   | 78885  | 1 | 5  | 0 | 0.30102999 | 0          | 4 | 1  | 0.11390336 | 0.30102999 |
| chr6 | 3369564   | 3437192   | 67629  | 2 | 5  | 0 | 0.19510895 | 0          | 5 | 1  | 0.19510895 | 0.30102999 |
| chr6 | 3437192   | 3527033   | 89842  | 2 | 5  | 0 | 0.12309572 | 0          | 6 | 1  | 0.30102999 | 0.30102999 |
| chr6 | 3527033   | 3527092   | 60     | 1 | 5  | 0 | 0.07511598 | 0          | 7 | 1  | 0.43181735 | 0.30102999 |
| chr6 | 3527092   | 3794072   | 266981 | 3 | 4  | 0 | 0.03812622 | 0          | 7 | 1  | 0.60763643 | 0.30102999 |
| chr6 | 3794072   | 3849877   | 55806  | 2 | 4  | 0 | 0.02074938 | 0          | 8 | 1  | 0.79906872 | 0.30102999 |
| chr6 | 3849877   | 3898778   | 48902  | 1 | 3  | 0 | 0.0079614  | 0          | 8 | 1  | 1.07548421 | 0.30102999 |
| chr6 | 3898778   | 3939209   | 40432  | 1 | 3  | 0 | 0.01598258 | 0          | 7 | 1  | 0.84395715 | 0.30102999 |
| chr6 | 3939209   | 4145434   | 206226 | 4 | 4  | 0 | 0.03812622 | 0          | 7 | 1  | 0.60763643 | 0.30102999 |
| chr6 | 4145434   | 4208273   | 62840  | 2 | 5  | 0 | 0.04407651 | 0          | 8 | 1  | 0.58747015 | 0.30102999 |
| chr6 | 4208273   | 4436059   | 227787 | 3 | 5  | 0 | 0.07511598 | 0          | 7 | 1  | 0.43181735 | 0.30102999 |
| chr6 | 4436059   | 4436118   | 60     | 1 | 6  | 0 | 0.08122616 | 0          | 8 | 1  | 0.4250187  | 0.30102999 |
| chr6 | 4436118   | 4489797   | 53680  | 1 | 5  | 0 | 0.04407651 | 0          | 8 | 1  | 0.58747015 | 0.30102999 |
| chr6 | 4489797   | 4674674   | 184878 | 4 | 5  | 0 | 0.02473314 | 0          | 9 | 1  | 0.76806864 | 0.30102999 |
| chr6 | 4674674   | 4755760   | 81087  | 2 | 6  | 0 | 0.04875589 | 0          | 9 | 1  | 0.5732208  | 0.30102999 |
| chr6 | 4755760   | 4791460   | 35701  | 2 | 7  | 0 | 0.08584816 | 0          | 9 | 1  | 0.42015402 | 0.30102999 |
| chr6 | 4791460   | 4996186   | 204727 | 3 | 7  | 0 | 0.20469099 | 0          | 7 | 1  | 0.20469099 | 0.30102999 |
| chr6 | 4996186   | 5114122   | 117937 | 2 | 5  | 0 | 0.07511598 | 0          | 7 | 1  | 0.43181735 | 0.30102999 |
| chr6 | 5114122   | 5114181   | 60     | 1 | 5  | 0 | 0.04407651 | 0          | 8 | 1  | 0.58747015 | 0.30102999 |
| chr6 | 5114181   | 5244107   | 129927 | 3 | 4  | 0 | 0.02074938 | 0          | 8 | 1  | 0.79906872 | 0.30102999 |
| chr6 | 5244107   | 5354461   | 110355 | 3 | 4  | 0 | 0.08122616 | 0          | 8 | 1  | 0.4250187  | 0.30102999 |
| chr6 | 5354461   | 5431389   | 76929  | 1 | 5  | 0 | 0.04407651 | 0          | 8 | 1  | 0.58747015 | 0.30102999 |
| chr6 | 5431389   | 5541120   | 109732 | 3 | 6  | 0 | 0.08122616 | 0          | 8 | 1  | 0.4250187  | 0.30102999 |
| chr6 | 5541120   | 5541179   | 60     | 1 | 7  | 0 | 0.13499366 | 0          | 8 | 1  | 0.30102999 | 0.30102999 |
| chr6 | 5541179   | 5658806   | 117628 | 2 | 7  | 0 | 0.20469099 | 0          | 7 | 1  | 0.20469099 | 0.30102999 |
| chr6 | 5658806   | 5793644   | 134839 | 3 | 7  | 0 | 0.30102999 | 0          | 6 | 1  | 0.129913   | 0.30102999 |
| chr6 | 5793644   | 6062974   | 269321 | 4 | 8  | 0 | 0.4250187  | 0          | 6 | 1  | 0.08122616 | 0.30102999 |
| chr6 | 6062974   | 6063033   | 60     | 1 | 10 | 0 | 0.74627054 | 0          | 6 | 1  | 0.02793176 | 0.30102999 |
| chr6 | 6063033   | 6167357   | 104325 | 1 | 9  | 0 | 0.5732208  | 0          | 6 | 1  | 0.04875589 | 0.30102999 |
| chr6 | 6167357   | 6204433   | 37077  | 2 | 9  | 0 | 0.30102999 | 0          | 8 | 1  | 0.13872638 | 0.30102999 |
| chr6 | 6204433   | 6321984   | 117552 | 2 | 8  | 0 | 0.30102999 | 0          | 7 | 1  | 0.13499366 | 0.30102999 |
| chr6 | 6321984   | 6361756   | 39773  | 2 | 8  | 0 | 0.20764654 | 0          | 8 | 1  | 0.20764654 | 0.30102999 |
| chr6 | 6361756   | 6464734   | 102979 | 2 | 9  | 0 | 0.30102999 | 0          | 8 | 1  | 0.13872638 | 0.30102999 |
| chr6 | 6464734   | 6849238   | 384505 | 6 | 8  | 0 | 0.30102999 | 0          | 7 | 1  | 0.13499366 | 0.30102999 |
| chr6 | 6849238   | 6849297   | 60     | 1 | 8  | 0 | 0.20764654 | 0          | 8 | 1  | 0.20764654 | 0.30102999 |
| chr6 | 6849297   | 6935627   | 86331  | 1 | 8  | 0 | 0.30102999 | 0          | 7 | 1  | 0.13499366 | 0.30102999 |
| chr6 | 6935627   | 7108164   | 172538 | 1 | 7  | 0 | 0.30102999 | 0          | 6 | 1  | 0.129913   | 0.30102999 |
| chr6 | 7108164   | 7210686   | 102523 | 1 | 7  | 1 | 0.30102999 | 0.1218695  | 6 | 1  | 0.129913   | 0.1218695  |
| chr6 | 7210686   | 7621929   | 411244 | 6 | 7  | 0 | 0.30102999 | 0          | 6 | 1  | 0.129913   | 0.30102999 |
| chr6 | 7621929   | 7621988   | 60     | 1 | 7  | 0 | 0.20469099 | 0          | 7 | 1  | 0.20469099 | 0.30102999 |
| chr6 | 7621988   | 7725598   | 103611 | 1 | 7  | 0 | 0.20469099 | 0          | 7 | 0  | 0.20469099 | 0          |
| chr6 | 7725598   | 7797658   | 72061  | 1 | 6  | 0 | 0.20064824 | 0          | 6 | 0  | 0.20064824 | 0          |
| chr6 | 7797658   | 7849301   | 51644  | 2 | 7  | 0 | 0.20469099 | 0          | 7 | 0  | 0.20469099 | 0          |
| chr6 | 7849301   | 7957626   | 108326 | 2 | 6  | 0 | 0.30102999 | 0          | 5 | 0  | 0.12309572 | 0          |
| chr6 | 7957626   | 8101948   | 144323 | 4 | 6  | 0 | 0.20064824 | 0          | 6 | 0  | 0.20064824 | 0          |
| chr6 | 8101948   | 8195167   | 93220  | 1 | 5  | 0 | 0.30102999 | 0          | 4 | 0  | 0.11390336 | 0          |
| chr6 | 8195167   | 8195226   | 60     | 1 | 5  | 0 | 0.30102999 | 0          | 4 | 1  | 0.11390336 | 0.30102999 |
| chr6 | 8195226   | 8434586   | 239361 | 2 | 5  | 0 | 0.45545077 | 0          | 3 | 1  | 0.05670724 | 0.30102999 |
| chr6 | 8434586   | 8548707   | 114122 | 1 | 4  | 0 | 0.30102999 | 0          | 3 | 1  | 0.10122019 | 0.30102999 |
| chr6 | 8548707   | 8548766   | 60     | 1 | 4  | 1 | 0.30102999 | 0.05404976 | 3 | 2  | 0.10122019 | 0.30102999 |
| chr6 | 8548766   | 8749552   | 200787 | 2 | 3  | 1 | 0.30102999 | 0.1218695  | 2 | 1  | 0.08289318 | 0.1218695  |
| chr6 | 8749552   | 8866195   | 116644 | 1 | 3  | 1 | 0.30102999 | 0.30102999 | 2 | 0  | 0.08289318 | 0          |
| chr6 | 8866195   | 9472850   | 606656 | 1 | 3  | 0 | 0.30102999 | 0          | 2 | 0  | 0.08289318 | 0          |
|      |           |           |        |   |    |   |            |            |   |    |            |            |

|      |          |          |        |    |   |   |            |            |   |   |            |            |
|------|----------|----------|--------|----|---|---|------------|------------|---|---|------------|------------|
| chr6 | 11083804 | 11210276 | 126473 | 2  | 5 | 2 | 0.07511598 | 0.30102999 | 7 | 1 | 0.43181735 | 0.05404976 |
| chr6 | 11210276 | 11210335 | 60     | 1  | 6 | 2 | 0.04875589 | 0.1575501  | 9 | 2 | 0.5732208  | 0.1575501  |
| chr6 | 11210335 | 11244604 | 34270  | 1  | 5 | 2 | 0.07511598 | 0.30102999 | 7 | 1 | 0.43181735 | 0.05404976 |
| chr6 | 11244604 | 11327614 | 83011  | 1  | 5 | 1 | 0.07511598 | 0.1218695  | 7 | 1 | 0.43181735 | 0.1218695  |
| chr6 | 11327614 | 11327673 | 60     | 1  | 6 | 1 | 0.04875589 | 0.1218695  | 9 | 1 | 0.5732208  | 0.1218695  |
| chr6 | 11327673 | 11891911 | 564239 | 10 | 5 | 1 | 0.07511598 | 0.1218695  | 7 | 1 | 0.43181735 | 0.1218695  |
| chr6 | 11891911 | 12164735 | 272825 | 4  | 5 | 1 | 0.19510895 | 0.30102999 | 5 | 0 | 0.19510895 | 0          |
| chr6 | 12164735 | 12296224 | 131490 | 5  | 5 | 1 | 0.12309572 | 0.30102999 | 6 | 0 | 0.30102999 | 0          |
| chr6 | 12296224 | 12405000 | 108777 | 2  | 5 | 1 | 0.19510895 | 0.30102999 | 5 | 0 | 0.19510895 | 0          |
| chr6 | 12405000 | 12405059 | 60     | 1  | 5 | 1 | 0.07511598 | 0.30102999 | 7 | 0 | 0.43181735 | 0          |
| chr6 | 12405059 | 12581384 | 176326 | 2  | 5 | 1 | 0.12309572 | 0.30102999 | 6 | 0 | 0.30102999 | 0          |
| chr6 | 12581384 | 12581443 | 60     | 1  | 5 | 1 | 0.12309572 | 0.1218695  | 6 | 1 | 0.30102999 | 0.1218695  |
| chr6 | 12581443 | 12719161 | 137719 | 1  | 5 | 1 | 0.19510895 | 0.1218695  | 5 | 1 | 0.19510895 | 0.1218695  |
| chr6 | 12719161 | 12775509 | 56349  | 2  | 5 | 1 | 0.12309572 | 0.1218695  | 6 | 1 | 0.30102999 | 0.1218695  |
| chr6 | 12775509 | 12974593 | 199085 | 3  | 5 | 1 | 0.19510895 | 0.1218695  | 5 | 1 | 0.19510895 | 0.1218695  |
| chr6 | 12974593 | 13030769 | 56177  | 2  | 6 | 1 | 0.20064824 | 0.1218695  | 6 | 1 | 0.20064824 | 0.1218695  |
| chr6 | 13030769 | 13030828 | 60     | 1  | 6 | 1 | 0.129913   | 0.1218695  | 7 | 1 | 0.30102999 | 0.1218695  |
| chr6 | 13030828 | 13137655 | 106828 | 2  | 6 | 1 | 0.20064824 | 0.1218695  | 6 | 1 | 0.20064824 | 0.1218695  |
| chr6 | 13137655 | 13248873 | 111219 | 2  | 5 | 1 | 0.12309572 | 0.30102999 | 6 | 0 | 0.30102999 | 0          |
| chr6 | 13248873 | 13268031 | 19159  | 2  | 6 | 1 | 0.129913   | 0.30102999 | 7 | 0 | 0.30102999 | 0          |
| chr6 | 13268031 | 13311751 | 43721  | 1  | 5 | 1 | 0.30102999 | 0.30102999 | 7 | 0 | 0.30102999 | 0          |
| chr6 | 13311751 | 13324065 | 12315  | 2  | 5 | 2 | 0.30102999 | 0.61140001 | 4 | 0 | 0.11390336 | 0          |
| chr6 | 13324065 | 13469664 | 145600 | 3  | 5 | 1 | 0.30102999 | 0.30102999 | 4 | 0 | 0.11390336 | 0          |
| chr6 | 13469664 | 13529695 | 6032   | 2  | 4 | 5 | 0.30102999 | 0.61140001 | 4 | 0 | 0.11390336 | 0          |
| chr6 | 13529695 | 13806728 | 277034 | 8  | 5 | 1 | 0.30102999 | 0.30102999 | 4 | 0 | 0.11390336 | 0          |
| chr6 | 13806728 | 13806787 | 60     | 1  | 5 | 2 | 0.30102999 | 0.61140001 | 4 | 0 | 0.11390336 | 0          |
| chr6 | 13806787 | 13891671 | 84885  | 1  | 5 | 1 | 0.30102999 | 0.30102999 | 4 | 0 | 0.11390336 | 0          |
| chr6 | 13891671 | 13891730 | 60     | 1  | 5 | 1 | 0.19510895 | 0.30102999 | 5 | 0 | 0.19510895 | 0          |
| chr6 | 13891730 | 13978235 | 86506  | 2  | 5 | 1 | 0.30102999 | 0.30102999 | 4 | 0 | 0.11390336 | 0          |
| chr6 | 13978235 | 14044891 | 66657  | 2  | 5 | 1 | 0.19510895 | 0.30102999 | 5 | 0 | 0.19510895 | 0          |
| chr6 | 14044891 | 14122940 | 78050  | 1  | 5 | 1 | 0.30102999 | 0.30102999 | 4 | 0 | 0.11390336 | 0          |
| chr6 | 14122940 | 14122999 | 60     | 1  | 5 | 1 | 0.07511598 | 0.30102999 | 7 | 0 | 0.43181735 | 0          |
| chr6 | 14122999 | 14183664 | 60666  | 1  | 5 | 0 | 0.12309572 | 0          | 6 | 0 | 0.30102999 | 0          |
| chr6 | 14183664 | 14311206 | 127543 | 1  | 5 | 0 | 0.19510895 | 0          | 5 | 0 | 0.19510895 | 0          |
| chr6 | 14311206 | 14417234 | 106029 | 1  | 4 | 0 | 0.11390336 | 0          | 5 | 0 | 0.30102999 | 0          |
| chr6 | 14417234 | 14545576 | 128343 | 1  | 4 | 0 | 0.18734596 | 0          | 4 | 0 | 0.18734596 | 0          |
| chr6 | 14545576 | 14545635 | 60     | 1  | 4 | 0 | 0.11390336 | 0          | 5 | 0 | 0.30102999 | 0          |
| chr6 | 14545635 | 14647002 | 101368 | 1  | 4 | 0 | 0.18734596 | 0          | 4 | 0 | 0.18734596 | 0          |
| chr6 | 14647002 | 14710122 | 63121  | 2  | 5 | 0 | 0.30102999 | 0          | 4 | 0 | 0.11390336 | 0          |
| chr6 | 14710122 | 14885265 | 175144 | 1  | 4 | 0 | 0.18734596 | 0          | 4 | 0 | 0.18734596 | 0          |
| chr6 | 14885265 | 15081806 | 196542 | 2  | 3 | 0 | 0.10122019 | 0          | 4 | 0 | 0.30102999 | 0          |
| chr6 | 15081806 | 15253135 | 171330 | 2  | 3 | 0 | 0.17593012 | 0          | 3 | 0 | 0.17593012 | 0          |
| chr6 | 15253135 | 15312132 | 58998  | 2  | 4 | 0 | 0.30102999 | 0          | 3 | 0 | 0.10122019 | 0          |
| chr6 | 15312132 | 15374392 | 62261  | 2  | 6 | 0 | 0.63695542 | 0          | 3 | 0 | 0.03070643 | 0          |
| chr6 | 15374392 | 15374446 | 55     | 1  | 6 | 0 | 0.30102999 | 0          | 5 | 0 | 0.12309572 | 0          |
| chr6 | 15374446 | 15580399 | 205954 | 3  | 5 | 0 | 0.19510895 | 0          | 5 | 0 | 0.19510895 | 0          |
| chr6 | 15580399 | 15615549 | 35151  | 2  | 6 | 1 | 0.30102999 | 0.30102999 | 5 | 0 | 0.12309572 | 0          |
| chr6 | 15615549 | 15794379 | 178831 | 2  | 5 | 1 | 0.30102999 | 0.30102999 | 4 | 0 | 0.11390336 | 0          |
| chr6 | 15794379 | 15915522 | 121144 | 2  | 6 | 1 | 0.44141547 | 0.30102999 | 4 | 0 | 0.06713722 | 0          |
| chr6 | 15915522 | 15915581 | 60     | 1  | 6 | 1 | 0.30102999 | 0.30102999 | 5 | 0 | 0.12309572 | 0          |
| chr6 | 15915581 | 16063023 | 147443 | 1  | 6 | 1 | 0.44141547 | 0.30102999 | 4 | 0 | 0.06713722 | 0          |
| chr6 | 16063023 | 16249176 | 186154 | 7  | 5 | 1 | 0.30102999 | 0.30102999 | 4 | 0 | 0.11390336 | 0          |
| chr6 | 16249176 | 16249235 | 60     | 1  | 6 | 1 | 0.44141547 | 0.30102999 | 4 | 0 | 0.06713722 | 0          |
| chr6 | 16249235 | 16295732 | 46498  | 2  | 5 | 1 | 0.30102999 | 0.30102999 | 4 | 0 | 0.11390336 | 0          |
| chr6 | 16295732 | 16318467 | 22736  | 2  | 6 | 1 | 0.44141547 | 0.30102999 | 4 | 0 | 0.06713722 | 0          |
| chr6 | 16318467 | 16441442 | 122976 | 3  | 7 | 1 | 0.60763643 | 0.30102999 | 4 | 0 | 0.03812622 | 0          |
| chr6 | 16441442 | 16441501 | 60     | 1  | 7 | 1 | 0.43181735 | 0.30102999 | 5 | 0 | 0.07511598 | 0          |
| chr6 | 16441501 | 16566479 | 124979 | 3  | 7 | 1 | 0.60763643 | 0.30102999 | 4 | 0 | 0.03812622 | 0          |
| chr6 | 16566479 | 16566538 | 60     | 1  | 7 | 1 | 0.43181735 | 0.30102999 | 5 | 0 | 0.07511598 | 0          |
| chr6 | 16566538 | 16623615 | 57078  | 1  | 6 | 1 | 0.30102999 | 0.30102999 | 5 | 0 | 0.12309572 | 0          |
| chr6 | 16623615 | 16658098 | 34484  | 2  | 6 | 1 | 0.20064824 | 0.30102999 | 6 | 0 | 0.20064824 | 0          |
| chr6 | 16658098 | 16846787 | 188690 | 4  | 7 | 1 | 0.30102999 | 0.30102999 | 6 | 0 | 0.129913   | 0          |
| chr6 | 16846787 | 17013088 | 166302 | 2  | 7 | 1 | 0.20469099 | 0.30102999 | 7 | 0 | 0.20469099 | 0          |
| chr6 | 17013088 | 17013147 | 60     | 1  | 7 | 1 | 0.08584816 | 0.30102999 | 9 | 0 | 0.20415402 | 0          |
| chr6 | 17013147 | 17227851 | 214705 | 2  | 7 | 1 | 0.13499366 | 0.30102999 | 8 | 0 | 0.30102999 | 0          |
| chr6 | 17227851 | 17284900 | 57050  | 1  | 7 | 0 | 0.13499366 | 0          | 8 | 0 | 0.30102999 | 0          |
| chr6 | 17284900 | 17507441 | 225542 | 7  | 7 | 0 | 0.08584816 | 0          | 9 | 0 | 0.20415402 | 0          |
| chr6 | 17507441 | 17609453 | 102013 | 2  | 7 | 0 | 0.13499366 | 0          | 8 | 0 | 0.30102999 | 0          |
| chr6 | 17609453 | 17637670 | 28218  | 2  | 7 | 1 | 0.13499366 | 0.30102999 | 8 | 0 | 0.30102999 | 0          |
| chr6 | 17637670 | 17972394 | 334725 | 9  | 7 | 0 | 0.13499366 | 0          | 8 | 0 | 0.30102999 | 0          |
| chr6 | 17972394 | 18093033 | 120640 | 2  | 7 | 0 | 0.20469099 | 0          | 7 | 0 | 0.20469099 | 0          |
| chr6 | 18093033 | 18160005 | 66973  | 3  | 7 | 0 | 0.13499366 | 0          | 8 | 0 | 0.30102999 | 0          |
| chr6 | 18160005 | 18160064 | 60     | 1  | 7 | 1 | 0.13499366 | 0.30102999 | 8 | 0 | 0.30102999 | 0          |
| chr6 | 18160064 | 18389392 | 229329 | 5  | 7 | 0 | 0.13499366 | 0          | 8 | 0 | 0.30102999 | 0          |
| chr6 | 18389392 | 18596430 | 207039 | 4  | 6 | 0 | 0.129913   | 0          | 7 | 0 | 0.30102999 | 0          |
| chr6 | 18596430 | 18648575 | 52146  | 2  | 6 | 0 | 0.08122616 | 0          | 8 | 0 | 0.4250187  | 0          |
| chr6 | 18648575 | 19190219 | 541645 | 4  | 6 | 0 | 0.129913   | 0          | 7 | 0 | 0.30102999 | 0          |
| chr6 | 19190219 | 19355845 | 165627 | 1  | 5 | 0 | 0.12309572 | 0          | 6 | 0 | 0.30102999 | 0          |
| chr6 | 19355845 | 19501625 | 145781 | 2  | 5 | 0 | 0.07511598 | 0          | 7 | 0 | 0.43181735 | 0          |
| chr6 | 19501625 | 19595112 | 93488  | 1  | 5 | 0 | 0.12309572 | 0          | 6 | 0 | 0.30102999 | 0          |
| chr6 | 19595112 | 19840220 | 245109 | 4  | 5 | 0 | 0.07511598 | 0          | 7 | 0 | 0.43181735 | 0          |
| chr6 | 19840220 | 19936116 | 95897  | 3  | 5 | 0 | 0.04407651 | 0          | 8 | 0 | 0.58747015 | 0          |
| chr6 | 19936116 | 20031401 | 95286  | 2  | 5 | 0 | 0.02473314 | 0          | 9 | 0 | 0.76806864 | 0          |
| chr6 | 20031401 | 20126873 | 95473  | 3  | 6 | 0 | 0.04875589 | 0          | 9 | 0 | 0.5732208  | 0          |
| chr6 | 20126873 | 20152890 | 26018  | 2  | 6 | 1 | 0.04875589 | 0.30102999 | 9 | 0 | 0.5732208  | 0          |
| chr6 | 20152890 | 20314434 | 161545 | 3  | 6 | 1 | 0.08122616 | 0.30102999 | 8 | 0 | 0.4250187  | 0          |
| chr6 | 20314434 | 20649563 | 335130 | 6  | 5 | 1 | 0.04407651 | 0.30102999 | 8 | 0 | 0.58747015 | 0          |
| chr6 | 20649563 | 20801967 | 152405 | 3  | 5 | 0 | 0.04407651 | 0          | 8 | 0 | 0.58747015 | 0          |
| chr6 | 20801967 | 20802026 | 60     | 1  | 5 | 1 | 0.04407651 | 0.30102999 | 8 | 0 | 0.58747015 | 0          |
| chr6 | 20802026 | 20903400 | 101375 | 2  | 5 | 0 | 0.07511598 | 0          | 7 | 0 | 0.43181735 | 0          |
| chr6 | 20903400 | 20951453 | 48054  | 1  | 5 | 0 | 0.12309572 | 0          | 6 | 0 | 0.30102999 | 0          |
| chr6 | 20951453 | 21043768 | 92316  | 3  | 5 | 0 | 0.07511598 | 0          | 7 | 0 | 0.43181735 | 0          |
| chr6 | 21043768 | 21082139 | 38372  | 2  | 5 | 0 | 0.04407651 | 0          | 8 | 0 | 0.58747015 | 0          |
| chr6 | 21082139 | 21082836 | 698    | 2  | 5 | 0 | 0.02473314 | 0          | 9 | 0 | 0.76806864 | 0          |
| chr6 | 21082836 | 21124309 | 41474  | 1  | 5 | 0 | 0.04407651 | 0          | 8 | 0 | 0.58747015 | 0          |
| chr6 | 21124309 | 21198286 | 73978  | 2  | 5 | 0 | 0.12309572 | 0          | 6 | 0 | 0.30102999 | 0          |
| chr6 | 21198286 | 21198345 | 60     | 1  | 5 | 0 | 0.07511598 | 0          | 7 | 0 | 0.43181735 | 0          |
| chr6 | 21198345 | 21390294 | 191950 | 2  | 5 | 0 | 0.12309572 | 0          | 6 | 0 | 0.30102999 | 0          |
| chr6 |          |          |        |    |   |   |            |            |   |   |            |            |

|      |          |          |        |    |    |   |            |            |    |   |            |            |
|------|----------|----------|--------|----|----|---|------------|------------|----|---|------------|------------|
| chr6 | 25594700 | 25594757 | 58     | 1  | 6  | 1 | 0.02793176 | 0.30102999 | 10 | 0 | 0.74627054 | 0          |
| chr6 | 25594757 | 25726301 | 131545 | 4  | 6  | 1 | 0.08122616 | 0.30102999 | 8  | 0 | 0.4250187  | 0          |
| chr6 | 25726301 | 25773847 | 47547  | 3  | 6  | 1 | 0.04875589 | 0.30102999 | 9  | 0 | 0.5732208  | 0          |
| chr6 | 25773847 | 25826797 | 52951  | 2  | 5  | 1 | 0.02473314 | 0.30102999 | 9  | 0 | 0.76806864 | 0          |
| chr6 | 25826797 | 25826856 | 60     | 1  | 6  | 1 | 0.04875589 | 0.30102999 | 9  | 0 | 0.5732208  | 0          |
| chr6 | 25826856 | 26033385 | 206530 | 6  | 5  | 1 | 0.02473314 | 0.30102999 | 9  | 0 | 0.76806864 | 0          |
| chr6 | 26033385 | 26104480 | 71096  | 2  | 5  | 1 | 0.04407651 | 0.30102999 | 8  | 0 | 0.58747015 | 0          |
| chr6 | 26104480 | 26107921 | 3442   | 2  | 6  | 1 | 0.04875589 | 0.30102999 | 9  | 0 | 0.5732208  | 0          |
| chr6 | 26107921 | 26124355 | 16435  | 2  | 6  | 1 | 0.02793176 | 0.30102999 | 10 | 0 | 0.74627054 | 0          |
| chr6 | 26124355 | 26125025 | 671    | 3  | 7  | 1 | 0.03037338 | 0.30102999 | 11 | 0 | 0.73110763 | 0          |
| chr6 | 26125025 | 26285413 | 160389 | 16 | 7  | 1 | 0.05232577 | 0.30102999 | 10 | 0 | 0.56314362 | 0          |
| chr6 | 26285413 | 26390395 | 104983 | 2  | 6  | 1 | 0.02793176 | 0.30102999 | 10 | 0 | 0.74627054 | 0          |
| chr6 | 26390395 | 26428978 | 38584  | 4  | 7  | 1 | 0.05232577 | 0.30102999 | 10 | 0 | 0.56314362 | 0          |
| chr6 | 26428978 | 26503057 | 74080  | 4  | 6  | 1 | 0.02793176 | 0.30102999 | 10 | 0 | 0.74627054 | 0          |
| chr6 | 26503057 | 26544373 | 41317  | 2  | 7  | 1 | 0.05232577 | 0.30102999 | 10 | 0 | 0.56314362 | 0          |
| chr6 | 26544373 | 26598356 | 53984  | 1  | 6  | 1 | 0.04875589 | 0.30102999 | 9  | 0 | 0.5732208  | 0          |
| chr6 | 26598356 | 26642819 | 44464  | 1  | 6  | 1 | 0.129913   | 0.30102999 | 7  | 0 | 0.30102999 | 0          |
| chr6 | 26642819 | 26689276 | 46458  | 1  | 5  | 1 | 0.07511598 | 0.30102999 | 7  | 0 | 0.43181735 | 0          |
| chr6 | 26689276 | 26999929 | 310654 | 2  | 5  | 1 | 0.04407651 | 0.30102999 | 8  | 0 | 0.58747015 | 0          |
| chr6 | 26999929 | 26999988 | 60     | 2  | 6  | 2 | 0.05232577 | 0.61140001 | 10 | 0 | 0.56314362 | 0          |
| chr6 | 26999988 | 27092982 | 92995  | 1  | 7  | 2 | 0.08584816 | 0.61140001 | 9  | 0 | 0.42615402 | 0          |
| chr6 | 27092982 | 27115339 | 22358  | 4  | 6  | 2 | 0.04875589 | 0.61140001 | 9  | 0 | 0.5732208  | 0          |
| chr6 | 27115339 | 27155070 | 39732  | 1  | 6  | 2 | 0.08122616 | 0.61140001 | 8  | 0 | 0.4250187  | 0          |
| chr6 | 27155070 | 27218227 | 63158  | 1  | 7  | 5 | 0.07511598 | 0.30102999 | 7  | 0 | 0.43181735 | 0          |
| chr6 | 27218227 | 27472009 | 253783 | 5  | 5  | 1 | 0.30102999 | 0.30102999 | 4  | 0 | 0.11390336 | 0          |
| chr6 | 27472009 | 27551763 | 79755  | 3  | 5  | 1 | 0.19510895 | 0.30102999 | 5  | 0 | 0.19510895 | 0          |
| chr6 | 27551763 | 28110946 | 559184 | 28 | 6  | 1 | 0.20064824 | 0.30102999 | 6  | 0 | 0.20064824 | 0          |
| chr6 | 28110946 | 28145142 | 34197  | 1  | 5  | 1 | 0.12309572 | 0.30102999 | 6  | 0 | 0.30102999 | 0          |
| chr6 | 28145142 | 28471522 | 326381 | 9  | 4  | 1 | 0.06713722 | 0.30102999 | 6  | 0 | 0.44141547 | 0          |
| chr6 | 28471522 | 28471581 | 60     | 1  | 6  | 1 | 0.20064824 | 0.30102999 | 6  | 0 | 0.20064824 | 0          |
| chr6 | 28471581 | 28501276 | 29696  | 1  | 5  | 1 | 0.12309572 | 0.30102999 | 6  | 0 | 0.30102999 | 0          |
| chr6 | 28501276 | 28537621 | 36346  | 1  | 4  | 1 | 0.06713722 | 0.30102999 | 6  | 0 | 0.44141547 | 0          |
| chr6 | 28537621 | 28648254 | 110634 | 3  | 5  | 1 | 0.12309572 | 0.30102999 | 6  | 0 | 0.30102999 | 0          |
| chr6 | 28648254 | 28682928 | 34675  | 2  | 5  | 1 | 0.07511598 | 0.30102999 | 7  | 0 | 0.43181735 | 0          |
| chr6 | 28682928 | 28746429 | 63502  | 1  | 5  | 1 | 0.12309572 | 0.30102999 | 6  | 0 | 0.30102999 | 0          |
| chr6 | 28746429 | 28802854 | 56426  | 1  | 5  | 1 | 0.19510895 | 0.30102999 | 5  | 0 | 0.19510895 | 0          |
| chr6 | 28802854 | 28802913 | 60     | 1  | 5  | 1 | 0.12309572 | 0.30102999 | 6  | 0 | 0.30102999 | 0          |
| chr6 | 28802913 | 28949288 | 146376 | 3  | 5  | 1 | 0.19510895 | 0.30102999 | 5  | 0 | 0.19510895 | 0          |
| chr6 | 28949288 | 28949347 | 60     | 1  | 5  | 1 | 0.12309572 | 0.30102999 | 6  | 0 | 0.30102999 | 0          |
| chr6 | 28949347 | 29045777 | 96431  | 2  | 5  | 1 | 0.19510895 | 0.30102999 | 5  | 0 | 0.19510895 | 0          |
| chr6 | 29045777 | 29045836 | 60     | 1  | 5  | 1 | 0.07511598 | 0.30102999 | 7  | 0 | 0.43181735 | 0          |
| chr6 | 29045836 | 29140581 | 94746  | 2  | 4  | 1 | 0.11390336 | 0.30102999 | 5  | 0 | 0.30102999 | 0          |
| chr6 | 29140581 | 29140640 | 60     | 1  | 4  | 1 | 0.02074938 | 0.30102999 | 8  | 0 | 0.79906872 | 0          |
| chr6 | 29140640 | 29184205 | 43566  | 1  | 4  | 1 | 0.03812622 | 0.30102999 | 7  | 0 | 0.60763643 | 0          |
| chr6 | 29184205 | 29184264 | 60     | 1  | 5  | 1 | 0.04407651 | 0.30102999 | 8  | 0 | 0.58747015 | 0          |
| chr6 | 29184264 | 29259856 | 75593  | 1  | 4  | 1 | 0.02074938 | 0.30102999 | 8  | 0 | 0.79906872 | 0          |
| chr6 | 29259856 | 29259915 | 60     | 1  | 4  | 1 | 0.01077081 | 0.30102999 | 9  | 0 | 1.01542894 | 0          |
| chr6 | 29259915 | 29426204 | 166290 | 5  | 4  | 1 | 0.06713722 | 0.30102999 | 6  | 0 | 0.44141547 | 0          |
| chr6 | 29426204 | 29527431 | 101228 | 4  | 4  | 1 | 0.03812622 | 0.30102999 | 7  | 0 | 0.60763643 | 0          |
| chr6 | 29527431 | 29553660 | 26230  | 3  | 5  | 1 | 0.07511598 | 0.30102999 | 7  | 0 | 0.43181735 | 0          |
| chr6 | 29553660 | 29638898 | 85239  | 2  | 5  | 1 | 0.12309572 | 0.30102999 | 6  | 0 | 0.30102999 | 0          |
| chr6 | 29638898 | 29638957 | 60     | 1  | 5  | 1 | 0.07511598 | 0.30102999 | 7  | 0 | 0.43181735 | 0          |
| chr6 | 29638957 | 29694190 | 55234  | 1  | 4  | 1 | 0.03812622 | 0.30102999 | 7  | 0 | 0.60763643 | 0          |
| chr6 | 29694190 | 29719673 | 25484  | 2  | 4  | 1 | 0.02074938 | 0.30102999 | 8  | 0 | 0.79906872 | 0          |
| chr6 | 29719673 | 29945375 | 225703 | 5  | 5  | 1 | 0.04407651 | 0.30102999 | 8  | 0 | 0.58747015 | 0          |
| chr6 | 29945375 | 30308038 | 362664 | 16 | 5  | 1 | 0.02473314 | 0.30102999 | 9  | 0 | 0.76806864 | 0          |
| chr6 | 30308038 | 30314498 | 6461   | 2  | 5  | 1 | 0.01320236 | 0.30102999 | 10 | 0 | 0.97390707 | 0          |
| chr6 | 30314498 | 30406771 | 92274  | 2  | 5  | 1 | 0.02473314 | 0.30102999 | 9  | 0 | 0.76806864 | 0          |
| chr6 | 30406771 | 30529936 | 123166 | 5  | 5  | 1 | 0.04407651 | 0.30102999 | 8  | 0 | 0.58747015 | 0          |
| chr6 | 30529936 | 30554673 | 24738  | 2  | 5  | 1 | 0.02473314 | 0.30102999 | 9  | 0 | 0.76806864 | 0          |
| chr6 | 30554673 | 30554732 | 60     | 1  | 6  | 1 | 0.04875589 | 0.30102999 | 9  | 0 | 0.5732208  | 0          |
| chr6 | 30554732 | 30593903 | 39172  | 2  | 5  | 1 | 0.02473314 | 0.30102999 | 9  | 0 | 0.76806864 | 0          |
| chr6 | 30593903 | 30595286 | 1384   | 2  | 6  | 1 | 0.04875589 | 0.30102999 | 9  | 0 | 0.5732208  | 0          |
| chr6 | 30595286 | 30629636 | 34351  | 1  | 5  | 1 | 0.02473314 | 0.30102999 | 9  | 0 | 0.76806864 | 0          |
| chr6 | 30629636 | 30629695 | 60     | 1  | 5  | 1 | 0.04875589 | 0.30102999 | 9  | 0 | 0.5732208  | 0          |
| chr6 | 30629695 | 30657076 | 27382  | 2  | 5  | 1 | 0.0666883  | 0.30102999 | 11 | 0 | 1.20576889 | 0          |
| chr6 | 30657076 | 30688370 | 31295  | 3  | 6  | 1 | 0.02473314 | 0.30102999 | 9  | 0 | 0.76806864 | 0          |
| chr6 | 30688370 | 30688425 | 56     | 1  | 9  | 1 | 0.14135546 | 0.30102999 | 10 | 0 | 0.30102999 | 0          |
| chr6 | 30688425 | 30698013 | 9589   | 1  | 7  | 1 | 0.05232577 | 0.30102999 | 10 | 0 | 0.56314362 | 0          |
| chr6 | 30698013 | 30825584 | 127572 | 3  | 7  | 1 | 0.05232577 | 0.1218695  | 10 | 1 | 0.56314362 | 0.1218695  |
| chr6 | 30825584 | 30860350 | 34767  | 3  | 7  | 1 | 0.08923391 | 0.1218695  | 10 | 1 | 0.4167287  | 0.1218695  |
| chr6 | 30860350 | 30921958 | 61609  | 7  | 8  | 1 | 0.05490675 | 0.1218695  | 11 | 1 | 0.55623409 | 0.1218695  |
| chr6 | 30921958 | 31078993 | 157036 | 2  | 8  | 1 | 0.08923391 | 0.1218695  | 10 | 1 | 0.4167287  | 0.1218695  |
| chr6 | 31078993 | 31106231 | 27239  | 3  | 9  | 2 | 0.09154957 | 0.30102999 | 11 | 1 | 0.4444882  | 0.05404976 |
| chr6 | 31106231 | 31120603 | 14373  | 3  | 10 | 2 | 0.14303407 | 0.30102999 | 11 | 1 | 0.30102999 | 0.05404976 |
| chr6 | 31120603 | 31277858 | 157256 | 6  | 9  | 2 | 0.09154957 | 0.30102999 | 11 | 1 | 0.4444882  | 0.05404976 |
| chr6 | 31277858 | 31348684 | 70827  | 1  | 8  | 2 | 0.05490675 | 0.30102999 | 11 | 1 | 0.55623409 | 0.05404976 |
| chr6 | 31348684 | 31513065 | 164382 | 5  | 9  | 2 | 0.09154957 | 0.30102999 | 11 | 1 | 0.4444882  | 0.05404976 |
| chr6 | 31513065 | 31525215 | 12151  | 1  | 9  | 2 | 0.14135546 | 0.30102999 | 10 | 1 | 0.30102999 | 0.05404976 |
| chr6 | 31525215 | 31525274 | 60     | 1  | 10 | 2 | 0.21118145 | 0.30102999 | 10 | 1 | 0.21118145 | 0.05404976 |
| chr6 | 31525274 | 31541471 | 16198  | 1  | 9  | 2 | 0.14135546 | 0.30102999 | 10 | 1 | 0.30102999 | 0.05404976 |
| chr6 | 31541471 | 31548413 | 6943   | 5  | 10 | 2 | 0.14303407 | 0.30102999 | 11 | 1 | 0.30102999 | 0.05404976 |
| chr6 | 31548413 | 31583427 | 35015  | 1  | 10 | 2 | 0.21118145 | 0.30102999 | 10 | 1 | 0.21118145 | 0.05404976 |
| chr6 | 31583427 | 31626810 | 43384  | 4  | 11 | 2 | 0.30102999 | 0.30102999 | 10 | 1 | 0.14303407 | 0.05404976 |
| chr6 | 31626810 | 31659133 | 32324  | 7  | 11 | 2 | 0.30102999 | 0.1218695  | 10 | 1 | 0.14303407 | 0.1218695  |
| chr6 | 31659133 | 31659192 | 60     | 1  | 11 | 2 | 0.30102999 | 0.30102999 | 10 | 1 | 0.14303407 | 0.05404976 |
| chr6 | 31659192 | 31688818 | 29627  | 5  | 10 | 2 | 0.21118145 | 0.61140001 | 10 | 0 | 0.21118145 | 0          |
| chr6 | 31688818 | 31695676 | 6859   | 2  | 11 | 2 | 0.30102999 | 0.61140001 | 10 | 0 | 0.14303407 | 0          |
| chr6 | 31695676 | 31720807 | 25132  | 2  | 11 | 2 | 0.30102999 | 0.30102999 | 10 | 0 | 0.14303407 | 0          |
| chr6 | 31720807 | 31797657 | 76851  | 9  | 12 | 1 | 0.30102999 | 0.30102999 | 11 | 0 | 0.14385241 | 0          |
| chr6 | 31797657 | 31804641 | 6985   | 3  | 12 | 1 | 0.30102999 | 0.1218695  | 11 | 1 | 0.14385241 | 0.1218695  |
| chr6 | 31804641 | 31857843 | 53203  | 5  | 12 | 1 | 0.30102999 | 0.30102999 | 11 | 0 | 0.14385241 | 0          |
| chr6 | 31857843 | 31902174 | 44332  | 1  | 12 | 1 | 0.41314172 | 0.30102999 | 10 | 0 | 0.09290028 | 0          |
| chr6 | 31902174 | 31905114 | 2941   | 2  | 12 | 1 | 0.30102999 | 0.30102999 | 11 | 0 | 0.14385241 | 0          |
| chr6 | 31905114 | 31922818 | 17705  | 2  | 12 | 1 | 0.413      |            |    |   |            |            |

|      |          |          |        |    |   |   |            |            |    |   |            |            |
|------|----------|----------|--------|----|---|---|------------|------------|----|---|------------|------------|
| chr6 | 33377086 | 33389795 | 12710  | 4  | 5 | 1 | 0.07511598 | 0.30102999 | 7  | 0 | 0.43181735 | 0          |
| chr6 | 33389795 | 33496935 | 107141 | 2  | 5 | 1 | 0.12309572 | 0.30102999 | 6  | 0 | 0.30102999 | 0          |
| chr6 | 33496935 | 33557887 | 60953  | 4  | 5 | 1 | 0.07511598 | 0.30102999 | 7  | 0 | 0.43181735 | 0          |
| chr6 | 33557887 | 33588535 | 30649  | 1  | 5 | 1 | 0.12309572 | 0.30102999 | 6  | 0 | 0.30102999 | 0          |
| chr6 | 33588535 | 33588591 | 57     | 1  | 5 | 1 | 0.07511598 | 0.30102999 | 7  | 0 | 0.43181735 | 0          |
| chr6 | 33588591 | 33677306 | 88716  | 3  | 5 | 1 | 0.12309572 | 0.30102999 | 6  | 0 | 0.30102999 | 0          |
| chr6 | 33677306 | 33693416 | 16111  | 2  | 5 | 1 | 0.20064824 | 0.30102999 | 6  | 0 | 0.20064824 | 0          |
| chr6 | 33693416 | 33748896 | 55481  | 1  | 5 | 1 | 0.12309572 | 0.30102999 | 6  | 0 | 0.30102999 | 0          |
| chr6 | 33748896 | 33770834 | 21939  | 2  | 5 | 1 | 0.07511598 | 0.30102999 | 7  | 0 | 0.43181735 | 0          |
| chr6 | 33770834 | 33963393 | 192560 | 2  | 5 | 1 | 0.12309572 | 0.30102999 | 6  | 0 | 0.30102999 | 0          |
| chr6 | 33963393 | 33977355 | 13963  | 2  | 5 | 1 | 0.07511598 | 0.30102999 | 7  | 0 | 0.43181735 | 0          |
| chr6 | 33977355 | 34034924 | 57570  | 2  | 6 | 1 | 0.129913   | 0.30102999 | 7  | 0 | 0.30102999 | 0          |
| chr6 | 34034924 | 34071292 | 36369  | 2  | 7 | 1 | 0.20469099 | 0.30102999 | 7  | 0 | 0.20469099 | 0          |
| chr6 | 34071292 | 34071351 | 60     | 1  | 8 | 1 | 0.30102999 | 0.30102999 | 7  | 0 | 0.13499366 | 0          |
| chr6 | 34071351 | 34086729 | 15379  | 6  | 1 | 1 | 0.129913   | 0.30102999 | 7  | 0 | 0.30102999 | 0          |
| chr6 | 34086729 | 34163154 | 76426  | 1  | 5 | 1 | 0.07511598 | 0.30102999 | 7  | 0 | 0.43181735 | 0          |
| chr6 | 34163154 | 34163213 | 60     | 1  | 5 | 1 | 0.04407651 | 0.30102999 | 8  | 0 | 0.58747015 | 0          |
| chr6 | 34163213 | 34209939 | 46727  | 1  | 5 | 1 | 0.07511598 | 0.30102999 | 7  | 0 | 0.43181735 | 0          |
| chr6 | 34209939 | 34263395 | 53457  | 1  | 5 | 1 | 0.12309572 | 0.30102999 | 6  | 0 | 0.30102999 | 0          |
| chr6 | 34263395 | 34332310 | 68916  | 3  | 6 | 1 | 0.20064824 | 0.30102999 | 6  | 0 | 0.20064824 | 0          |
| chr6 | 34332310 | 34471102 | 138793 | 4  | 7 | 1 | 0.30102999 | 0.30102999 | 6  | 0 | 0.129913   | 0.1218695  |
| chr6 | 34471102 | 34520505 | 49404  | 2  | 7 | 1 | 0.30102999 | 0.30102999 | 6  | 1 | 0.129913   | 0.1218695  |
| chr6 | 34520505 | 34520561 | 57     | 1  | 7 | 1 | 0.20469099 | 0.1218695  | 7  | 1 | 0.20469099 | 0.1218695  |
| chr6 | 34520561 | 34555153 | 34599  | 1  | 7 | 1 | 0.30102999 | 0.1218695  | 6  | 1 | 0.129913   | 0.1218695  |
| chr6 | 34555153 | 34578199 | 23047  | 1  | 7 | 0 | 0.30102999 | 0          | 6  | 1 | 0.129913   | 0.30102999 |
| chr6 | 34578199 | 34578258 | 60     | 1  | 7 | 0 | 0.20469099 | 0          | 7  | 1 | 0.20469099 | 0.30102999 |
| chr6 | 34578258 | 34614753 | 36496  | 1  | 7 | 0 | 0.20469099 | 0          | 7  | 0 | 0.20469099 | 0          |
| chr6 | 34614753 | 34649402 | 34650  | 1  | 7 | 0 | 0.30102999 | 0          | 6  | 0 | 0.129913   | 0          |
| chr6 | 34649402 | 34700092 | 50691  | 2  | 7 | 1 | 0.30102999 | 0.30102999 | 6  | 0 | 0.129913   | 0          |
| chr6 | 34700092 | 34734425 | 34334  | 2  | 7 | 1 | 0.20469099 | 0.30102999 | 7  | 0 | 0.20469099 | 0          |
| chr6 | 34734425 | 34824605 | 90181  | 2  | 7 | 1 | 0.30102999 | 0.30102999 | 6  | 0 | 0.129913   | 0          |
| chr6 | 34824605 | 34850792 | 26188  | 1  | 7 | 0 | 0.30102999 | 0          | 6  | 0 | 0.129913   | 0          |
| chr6 | 34850792 | 34965512 | 114721 | 4  | 7 | 0 | 0.20469099 | 0          | 7  | 0 | 0.20469099 | 0          |
| chr6 | 34965512 | 35031548 | 66037  | 2  | 7 | 1 | 0.20469099 | 0.30102999 | 7  | 0 | 0.20469099 | 0          |
| chr6 | 35031548 | 35219348 | 187801 | 8  | 7 | 0 | 0.20469099 | 0          | 7  | 0 | 0.20469099 | 0          |
| chr6 | 35219348 | 35250592 | 31245  | 3  | 7 | 0 | 0.13499366 | 0          | 8  | 0 | 0.30102999 | 0          |
| chr6 | 35250592 | 35269663 | 176372 | 6  | 7 | 0 | 0.20469099 | 0          | 7  | 0 | 0.20469099 | 0          |
| chr6 | 35269663 | 35489509 | 62547  | 8  | 7 | 0 | 0.13499366 | 0          | 8  | 0 | 0.30102999 | 0          |
| chr6 | 35489509 | 35790836 | 301328 | 8  | 7 | 1 | 0.13499366 | 0.30102999 | 8  | 0 | 0.30102999 | 0          |
| chr6 | 35790836 | 35840824 | 49989  | 1  | 6 | 1 | 0.08122616 | 0.30102999 | 8  | 0 | 0.4250187  | 0          |
| chr6 | 35840824 | 35840883 | 60     | 1  | 6 | 2 | 0.08122616 | 0.61140001 | 8  | 0 | 0.4250187  | 0          |
| chr6 | 35840883 | 35869457 | 28575  | 1  | 6 | 1 | 0.08122616 | 0.30102999 | 8  | 0 | 0.4250187  | 0          |
| chr6 | 35869457 | 35869516 | 60     | 1  | 7 | 1 | 0.13499366 | 0.30102999 | 8  | 0 | 0.30102999 | 0          |
| chr6 | 35869516 | 35927384 | 57869  | 1  | 7 | 1 | 0.20469099 | 0.30102999 | 7  | 0 | 0.20469099 | 0          |
| chr6 | 35927384 | 35997490 | 70107  | 2  | 6 | 1 | 0.129913   | 0.30102999 | 7  | 0 | 0.30102999 | 0          |
| chr6 | 35997490 | 36040640 | 43151  | 3  | 7 | 1 | 0.13499366 | 0.30102999 | 8  | 0 | 0.30102999 | 0          |
| chr6 | 36040640 | 36070415 | 29776  | 2  | 7 | 2 | 0.13499366 | 0.61140001 | 8  | 0 | 0.30102999 | 0          |
| chr6 | 36070415 | 36103006 | 32592  | 1  | 6 | 2 | 0.08122616 | 0.61140001 | 8  | 0 | 0.4250187  | 0          |
| chr6 | 36103006 | 36187934 | 84929  | 2  | 6 | 1 | 0.129913   | 0.30102999 | 7  | 0 | 0.30102999 | 0          |
| chr6 | 36187934 | 36358592 | 170659 | 5  | 6 | 2 | 0.129913   | 0.61140001 | 7  | 0 | 0.30102999 | 0          |
| chr6 | 36358592 | 36410520 | 51929  | 2  | 6 | 2 | 0.08122616 | 0.61140001 | 8  | 0 | 0.4250187  | 0          |
| chr6 | 36410520 | 36437855 | 27346  | 2  | 7 | 2 | 0.08584816 | 0.61140001 | 9  | 0 | 0.42015402 | 0          |
| chr6 | 36437855 | 36513924 | 76070  | 2  | 6 | 1 | 0.04875589 | 0.30102999 | 9  | 0 | 0.5732208  | 0          |
| chr6 | 36513924 | 36778123 | 264200 | 11 | 6 | 1 | 0.129913   | 0.30102999 | 7  | 0 | 0.30102999 | 0          |
| chr6 | 36778123 | 37029712 | 251590 | 11 | 6 | 1 | 0.08122616 | 0.30102999 | 8  | 0 | 0.4250187  | 0          |
| chr6 | 37029712 | 37029771 | 60     | 1  | 6 | 1 | 0.04875589 | 0.30102999 | 9  | 0 | 0.5732208  | 0          |
| chr6 | 37029771 | 37179962 | 150192 | 5  | 6 | 1 | 0.08122616 | 0.30102999 | 8  | 0 | 0.4250187  | 0          |
| chr6 | 37179962 | 37349084 | 169123 | 5  | 6 | 1 | 0.04875589 | 0.30102999 | 9  | 0 | 0.5732208  | 0          |
| chr6 | 37349084 | 37403430 | 54347  | 3  | 6 | 1 | 0.02793716 | 0.30102999 | 10 | 0 | 0.74627054 | 0          |
| chr6 | 37403430 | 37509377 | 105948 | 3  | 6 | 1 | 0.129913   | 0.30102999 | 7  | 0 | 0.30102999 | 0          |
| chr6 | 37509377 | 37509436 | 60     | 1  | 6 | 1 | 0.04875589 | 0.30102999 | 9  | 0 | 0.5732208  | 0          |
| chr6 | 37509436 | 37605888 | 96453  | 1  | 6 | 1 | 0.129913   | 0.30102999 | 7  | 0 | 0.30102999 | 0          |
| chr6 | 37605888 | 3785349  | 179462 | 2  | 6 | 1 | 0.20064824 | 0.30102999 | 6  | 0 | 0.20064824 | 0          |
| chr6 | 3785349  | 37849852 | 64445  | 3  | 6 | 1 | 0.08122616 | 0.30102999 | 8  | 0 | 0.4250187  | 0          |
| chr6 | 37849852 | 37897789 | 47938  | 1  | 6 | 1 | 0.04875589 | 0.30102999 | 8  | 0 | 0.5732208  | 0          |
| chr6 | 37897789 | 37932443 | 34655  | 1  | 6 | 1 | 0.08122616 | 0.30102999 | 8  | 0 | 0.4250187  | 0          |
| chr6 | 37932443 | 37979660 | 47218  | 1  | 6 | 1 | 0.129913   | 0.30102999 | 7  | 0 | 0.30102999 | 0          |
| chr6 | 37979660 | 38068871 | 89212  | 2  | 4 | 1 | 0.06713722 | 0.30102999 | 6  | 0 | 0.44141547 | 0          |
| chr6 | 38068871 | 38142161 | 73291  | 2  | 5 | 1 | 0.12309572 | 0.30102999 | 6  | 0 | 0.30102999 | 0          |
| chr6 | 38142161 | 38180792 | 38632  | 2  | 5 | 1 | 0.07511598 | 0.30102999 | 7  | 0 | 0.43181735 | 0          |
| chr6 | 38180792 | 38180851 | 60     | 1  | 6 | 1 | 0.129913   | 0.30102999 | 7  | 0 | 0.30102999 | 0          |
| chr6 | 38180851 | 38252496 | 17646  | 2  | 6 | 1 | 0.20064824 | 0.30102999 | 6  | 0 | 0.20064824 | 0          |
| chr6 | 38252496 | 38252555 | 60     | 1  | 6 | 1 | 0.129913   | 0.30102999 | 7  | 0 | 0.30102999 | 0          |
| chr6 | 38252555 | 38418836 | 166282 | 3  | 3 | 1 | 0.05670724 | 0.30102999 | 5  | 0 | 0.45545077 | 0          |
| chr6 | 38418836 | 38483074 | 64239  | 3  | 4 | 1 | 0.11390336 | 0.30102999 | 5  | 0 | 0.30102999 | 0          |
| chr6 | 38483074 | 38545447 | 62374  | 2  | 5 | 1 | 0.19510895 | 0.30102999 | 5  | 0 | 0.19510895 | 0          |
| chr6 | 38545447 | 38593281 | 47835  | 1  | 4 | 1 | 0.11390336 | 0.30102999 | 5  | 0 | 0.30102999 | 0          |
| chr6 | 38593281 | 38754721 | 161441 | 4  | 4 | 1 | 0.06713722 | 0.30102999 | 6  | 0 | 0.44141547 | 0          |
| chr6 | 38754721 | 38885196 | 130476 | 3  | 4 | 1 | 0.11390336 | 0.30102999 | 5  | 0 | 0.30102999 | 0          |
| chr6 | 38885196 | 39003892 | 118697 | 3  | 3 | 1 | 0.05670724 | 0.30102999 | 5  | 0 | 0.45545077 | 0          |
| chr6 | 39003892 | 39003951 | 60     | 1  | 3 | 1 | 0.03070643 | 0.30102999 | 6  | 0 | 0.63695542 | 0          |
| chr6 | 39003951 | 39507808 | 503858 | 13 | 3 | 1 | 0.05670724 | 0.30102999 | 5  | 0 | 0.45545077 | 0          |
| chr6 | 39507808 | 39581432 | 73625  | 1  | 3 | 1 | 0.10122019 | 0.30102999 | 4  | 0 | 0.30102999 | 0          |
| chr6 | 39581432 | 39581491 | 60     | 1  | 3 | 1 | 0.10122019 | 0.1218695  | 4  | 1 | 0.30102999 | 0.1218695  |
| chr6 | 39581491 | 39654656 | 73166  | 1  | 3 | 1 | 0.10122019 | 0.30102999 | 4  | 0 | 0.30102999 | 0          |
| chr6 | 39654656 | 39654715 | 60     | 1  | 4 | 1 | 0.06713722 | 0.30102999 | 6  | 0 | 0.44141547 | 0          |
| chr6 | 39654715 | 39734163 | 79449  | 1  | 4 | 1 | 0.11390336 | 0.30102999 | 5  | 0 | 0.30102999 | 0          |
| chr6 | 39734163 | 39734222 | 60     | 1  | 5 | 1 | 0.19510895 | 0.30102999 | 5  | 0 | 0.19510895 | 0          |
| chr6 | 39734222 | 39828689 | 94468  | 3  | 4 | 0 | 0.11390336 | 0          | 5  | 0 | 0.30102999 | 0          |
| chr6 | 39828689 | 39862003 | 33315  | 2  | 5 | 1 | 0.19510895 | 0.30102999 | 5  | 0 | 0.19510895 | 0          |
| chr6 | 39862003 | 39937893 | 75891  | 3  | 5 | 0 | 0.19510895 | 0          | 5  | 0 | 0.19510895 | 0          |
| chr6 | 39937893 | 39937952 | 60     | 1  | 5 | 1 | 0.19510895 | 0.30102999 | 5  | 0 | 0.19510895 | 0          |
| chr6 | 39937952 | 40001906 | 63955  | 1  | 4 | 0 | 0.11390336 | 0          | 5  | 0 | 0.30102999 | 0          |
| chr6 | 40001906 | 40254912 | 253007 | 2  | 3 | 0 | 0.05670724 | 0          | 5  | 0 | 0.45545077 | 0          |
| chr6 | 40254912 | 40321633 | 66722  | 2  | 3 | 1 | 0.05670724 | 0.30102999 | 5  | 0 | 0.45545077 | 0          |
| chr6 | 40321633 | 40569149 | 247517 | 5  | 4 | 1 | 0.11390336 | 0.30102999 | 5  | 0 | 0.30102999 | 0          |
| chr6 | 40569149 | 40841720 | 272572 | 2  | 3 | 1 | 0.05670724 | 0.30102999 | 5  | 0 | 0.         |            |

|      |          |          |        |    |   |   |            |           |    |   |            |            |
|------|----------|----------|--------|----|---|---|------------|-----------|----|---|------------|------------|
| chr6 | 43635525 | 43644080 | 8556   | 2  | 6 | 1 | 0.08122616 | 0.1218695 | 8  | 1 | 0.4250187  | 0.1218695  |
| chr6 | 43644080 | 43738066 | 93987  | 2  | 5 | 1 | 0.07511598 | 0.1218695 | 7  | 1 | 0.43181735 | 0.1218695  |
| chr6 | 43738066 | 43798208 | 60143  | 4  | 6 | 1 | 0.129913   | 0.1218695 | 7  | 1 | 0.30102999 | 0.1218695  |
| chr6 | 43798208 | 43969565 | 171358 | 1  | 6 | 0 | 0.129913   | 0         | 7  | 1 | 0.30102999 | 0.30102999 |
| chr6 | 43969565 | 44002922 | 33358  | 4  | 7 | 0 | 0.13499366 | 0         | 8  | 1 | 0.30102999 | 0.30102999 |
| chr6 | 44002922 | 44083725 | 80804  | 1  | 6 | 0 | 0.08122616 | 0         | 8  | 1 | 0.4250187  | 0.30102999 |
| chr6 | 44083725 | 44146874 | 63150  | 1  | 5 | 0 | 0.04407651 | 0         | 8  | 1 | 0.58747015 | 0.30102999 |
| chr6 | 44146874 | 44146933 | 60     | 1  | 5 | 0 | 0.02473314 | 0         | 9  | 1 | 0.76806864 | 0.30102999 |
| chr6 | 44146933 | 44249729 | 102797 | 5  | 5 | 0 | 0.04407651 | 0         | 8  | 1 | 0.58747015 | 0.30102999 |
| chr6 | 44249729 | 44358073 | 108345 | 5  | 5 | 0 | 0.02473314 | 0         | 9  | 1 | 0.76806864 | 0.30102999 |
| chr6 | 44358073 | 44415140 | 57068  | 5  | 5 | 0 | 0.01320236 | 0         | 10 | 1 | 0.97390707 | 0.30102999 |
| chr6 | 44415140 | 44596012 | 180873 | 1  | 5 | 0 | 0.04407651 | 0         | 8  | 1 | 0.58747015 | 0.30102999 |
| chr6 | 44596012 | 44796618 | 200607 | 2  | 6 | 0 | 0.08122616 | 0         | 8  | 1 | 0.4250187  | 0.30102999 |
| chr6 | 44796618 | 44902611 | 105994 | 4  | 7 | 0 | 0.08584816 | 0         | 9  | 1 | 0.42015402 | 0.30102999 |
| chr6 | 44902611 | 44902670 | 60     | 1  | 7 | 0 | 0.05232577 | 0         | 10 | 1 | 0.56314362 | 0.30102999 |
| chr6 | 44902670 | 44971472 | 68803  | 1  | 6 | 0 | 0.08122616 | 0         | 8  | 1 | 0.4250187  | 0.30102999 |
| chr6 | 44971472 | 45020461 | 48990  | 1  | 6 | 0 | 0.129913   | 0         | 7  | 1 | 0.30102999 | 0.30102999 |
| chr6 | 45020461 | 45073711 | 53251  | 1  | 5 | 0 | 0.07511598 | 0         | 7  | 1 | 0.43181735 | 0.30102999 |
| chr6 | 45073711 | 45128523 | 54813  | 2  | 6 | 0 | 0.129913   | 0         | 7  | 1 | 0.30102999 | 0.30102999 |
| chr6 | 45128523 | 45179039 | 50517  | 3  | 8 | 0 | 0.13872638 | 0         | 9  | 1 | 0.30102999 | 0.30102999 |
| chr6 | 45179039 | 45341709 | 162671 | 3  | 7 | 0 | 0.13499366 | 0         | 8  | 1 | 0.30102999 | 0.30102999 |
| chr6 | 45341709 | 45910266 | 585558 | 7  | 6 | 0 | 0.20064824 | 0         | 6  | 1 | 0.20064824 | 0.30102999 |
| chr6 | 45910266 | 45980219 | 69954  | 2  | 5 | 0 | 0.12309572 | 0         | 6  | 1 | 0.30102999 | 0.30102999 |
| chr6 | 45980219 | 45980278 | 60     | 1  | 6 | 0 | 0.20064824 | 0         | 6  | 1 | 0.20064824 | 0.30102999 |
| chr6 | 45980278 | 46054890 | 74613  | 2  | 5 | 0 | 0.12309572 | 0         | 6  | 1 | 0.30102999 | 0.30102999 |
| chr6 | 46054890 | 46112152 | 57263  | 2  | 5 | 0 | 0.12309572 | 0         | 6  | 0 | 0.30102999 | 0          |
| chr6 | 46112152 | 47004310 | 892159 | 24 | 4 | 0 | 0.06713722 | 0         | 6  | 0 | 0.44141547 | 0          |
| chr6 | 47004310 | 47170572 | 166263 | 2  | 5 | 0 | 0.12309572 | 0         | 6  | 0 | 0.30102999 | 0          |
| chr6 | 47170572 | 47501506 | 330935 | 7  | 5 | 0 | 0.07511598 | 0         | 7  | 0 | 0.43181735 | 0          |
| chr6 | 47501506 | 47592779 | 91274  | 2  | 4 | 0 | 0.11390336 | 0         | 5  | 0 | 0.30102999 | 0          |
| chr6 | 47592779 | 47592838 | 60     | 1  | 4 | 0 | 0.06713722 | 0         | 6  | 0 | 0.44141547 | 0          |
| chr6 | 47592838 | 47665567 | 72730  | 2  | 4 | 0 | 0.30102999 | 0         | 3  | 0 | 0.10122019 | 0          |
| chr6 | 47665567 | 47876997 | 211431 | 4  | 3 | 0 | 0.17593012 | 0         | 3  | 0 | 0.17593012 | 0          |
| chr6 | 47876997 | 47936534 | 59538  | 1  | 3 | 0 | 0.30102999 | 0         | 2  | 0 | 0.08289318 | 0          |
| chr6 | 47936534 | 48168800 | 232267 | 3  | 2 | 0 | 0.1575501  | 0         | 2  | 0 | 0.1575501  | 0          |
| chr6 | 48168800 | 48168859 | 60     | 1  | 3 | 0 | 0.30102999 | 0         | 2  | 0 | 0.08289318 | 0          |
| chr6 | 48168859 | 48217975 | 49117  | 1  | 1 | 0 | 0.1218695  | 0         | 1  | 0 | 0.1218695  | 0          |
| chr6 | 48217975 | 48381374 | 163400 | 1  | 0 | 0 | 0          | 0         | 1  | 0 | 0.30102999 | 0          |
| chr6 | 48381374 | 48540177 | 158804 | 2  | 2 | 0 | 0.30102999 | 0         | 1  | 0 | 0.05404976 | 0          |
| chr6 | 48540177 | 48540236 | 60     | 1  | 2 | 0 | 0.08289318 | 0         | 3  | 0 | 0.30102999 | 0          |
| chr6 | 48540236 | 48682849 | 142614 | 1  | 1 | 0 | 0.02438896 | 0         | 3  | 0 | 0.51676182 | 0          |
| chr6 | 48682849 | 48853381 | 170533 | 2  | 2 | 0 | 0.08289318 | 0         | 3  | 0 | 0.30102999 | 0          |
| chr6 | 48853381 | 49520226 | 666846 | 8  | 1 | 0 | 0.02438896 | 0         | 3  | 0 | 0.51676182 | 0          |
| chr6 | 49520226 | 49524620 | 4395   | 2  | 2 | 0 | 0.08289318 | 0         | 3  | 0 | 0.30102999 | 0          |
| chr6 | 49524620 | 49705011 | 180392 | 5  | 1 | 0 | 0.02438896 | 0         | 3  | 0 | 0.51676182 | 0          |
| chr6 | 49705011 | 49754264 | 49254  | 2  | 1 | 0 | 0.01091641 | 0         | 4  | 0 | 0.76005302 | 0          |
| chr6 | 49754264 | 49754310 | 47     | 1  | 2 | 0 | 0.0429175  | 0         | 4  | 0 | 0.47744371 | 0          |
| chr6 | 49754310 | 50153612 | 399303 | 6  | 1 | 0 | 0.01091641 | 0         | 4  | 0 | 0.76005302 | 0          |
| chr6 | 50153612 | 50519405 | 365794 | 3  | 3 | 0 | 0.03070643 | 0         | 6  | 0 | 0.63695542 | 0          |
| chr6 | 50519405 | 50519464 | 60     | 1  | 3 | 0 | 0.01598258 | 0         | 7  | 0 | 0.84395715 | 0          |
| chr6 | 50519464 | 50677418 | 157955 | 1  | 3 | 0 | 0.03070643 | 0         | 6  | 0 | 0.63695542 | 0          |
| chr6 | 50677418 | 50787061 | 109644 | 3  | 4 | 0 | 0.06713722 | 0         | 6  | 0 | 0.44141547 | 0          |
| chr6 | 50787061 | 50855651 | 68591  | 2  | 6 | 0 | 0.20064824 | 0         | 6  | 0 | 0.20064824 | 0          |
| chr6 | 50855651 | 50938895 | 83245  | 1  | 5 | 0 | 0.12309572 | 0         | 6  | 0 | 0.30102999 | 0          |
| chr6 | 50938895 | 50938954 | 60     | 1  | 5 | 0 | 0.07511598 | 0         | 7  | 0 | 0.43181735 | 0          |
| chr6 | 50938954 | 51188587 | 249634 | 2  | 3 | 0 | 0.03070643 | 0         | 6  | 0 | 0.63695542 | 0          |
| chr6 | 51188587 | 51285782 | 97196  | 3  | 4 | 0 | 0.03812622 | 0         | 7  | 0 | 0.60763643 | 0          |
| chr6 | 51285782 | 51356400 | 70619  | 1  | 4 | 0 | 0.06713722 | 0         | 6  | 0 | 0.44141547 | 0          |
| chr6 | 51356400 | 51565572 | 209173 | 5  | 4 | 0 | 0.03812622 | 0         | 7  | 0 | 0.60763643 | 0          |
| chr6 | 51565572 | 51565631 | 60     | 1  | 4 | 0 | 0.03812622 | 0         | 7  | 1 | 0.60763643 | 0.30102999 |
| chr6 | 51565631 | 51676030 | 110400 | 2  | 4 | 0 | 0.03812622 | 0         | 7  | 0 | 0.60763643 | 0          |
| chr6 | 51676030 | 51732872 | 56843  | 2  | 4 | 0 | 0.02074938 | 0         | 8  | 0 | 0.79906872 | 0          |
| chr6 | 51732872 | 51732931 | 60     | 1  | 4 | 0 | 0.02074938 | 0         | 8  | 1 | 0.79906872 | 0.30102999 |
| chr6 | 51732931 | 51781690 | 48760  | 6  | 0 | 0 | 0.02074938 | 0         | 8  | 0 | 0.79906872 | 0          |
| chr6 | 51781690 | 51781749 | 60     | 1  | 4 | 0 | 0.01077081 | 0         | 9  | 0 | 1.01542894 | 0          |
| chr6 | 51781749 | 51824641 | 42893  | 1  | 4 | 0 | 0.03812622 | 0         | 7  | 0 | 0.60763643 | 0          |
| chr6 | 51824641 | 51856209 | 31569  | 2  | 4 | 0 | 0.02074938 | 0         | 8  | 0 | 0.79906872 | 0          |
| chr6 | 51856209 | 51918238 | 62030  | 2  | 4 | 0 | 0.01077081 | 0         | 9  | 0 | 1.01542894 | 0          |
| chr6 | 51918238 | 51918297 | 60     | 1  | 5 | 0 | 0.02473314 | 0         | 9  | 0 | 0.76806864 | 0          |
| chr6 | 51918297 | 52018676 | 100380 | 3  | 4 | 0 | 0.02074938 | 0         | 8  | 0 | 0.79906872 | 0          |
| chr6 | 52018676 | 52018735 | 60     | 1  | 5 | 0 | 0.02473314 | 0         | 9  | 0 | 0.76806864 | 0          |
| chr6 | 52018735 | 52054898 | 36164  | 2  | 5 | 0 | 0.07511598 | 0         | 7  | 0 | 0.43181735 | 0          |
| chr6 | 52054898 | 52103749 | 48852  | 2  | 5 | 0 | 0.04407651 | 0         | 8  | 0 | 0.58747015 | 0          |
| chr6 | 52103749 | 52174776 | 71028  | 3  | 5 | 0 | 0.04407651 | 0         | 8  | 1 | 0.58747015 | 0.30102999 |
| chr6 | 52174776 | 52174835 | 60     | 1  | 5 | 0 | 0.02473314 | 0         | 9  | 1 | 0.76806864 | 0.30102999 |
| chr6 | 52174835 | 52248137 | 73303  | 1  | 4 | 0 | 0.03812622 | 0         | 7  | 1 | 0.60763643 | 0.30102999 |
| chr6 | 52248137 | 52318918 | 70782  | 1  | 3 | 0 | 0.01598258 | 0         | 7  | 1 | 0.84395715 | 0.30102999 |
| chr6 | 52318918 | 52436596 | 117679 | 5  | 4 | 0 | 0.01077081 | 0         | 9  | 1 | 1.01542894 | 0.30102999 |
| chr6 | 52436596 | 52536762 | 100167 | 1  | 4 | 0 | 0.02074938 | 0         | 8  | 1 | 0.79906872 | 0.30102999 |
| chr6 | 52536762 | 52577491 | 40730  | 2  | 5 | 0 | 0.04407651 | 0         | 8  | 1 | 0.58747015 | 0.30102999 |
| chr6 | 52577491 | 52605937 | 28447  | 2  | 6 | 0 | 0.08122616 | 0         | 8  | 1 | 0.4250187  | 0.30102999 |
| chr6 | 52605937 | 52883117 | 277181 | 7  | 5 | 0 | 0.04407651 | 0         | 8  | 1 | 0.58747015 | 0.30102999 |
| chr6 | 52883117 | 52883176 | 60     | 1  | 5 | 0 | 0.02473314 | 0         | 9  | 1 | 0.76806864 | 0.30102999 |
| chr6 | 52883176 | 53043731 | 160556 | 4  | 3 | 0 | 0.00378107 | 0         | 9  | 1 | 1.33111237 | 0.30102999 |
| chr6 | 53043731 | 53043790 | 60     | 1  | 5 | 0 | 0.02473314 | 0         | 9  | 1 | 0.76806864 | 0.30102999 |
| chr6 | 53043790 | 53133054 | 89265  | 2  | 4 | 0 | 0.00378107 | 0         | 9  | 1 | 1.33111237 | 0.30102999 |
| chr6 | 53133054 | 53166598 | 33545  | 2  | 4 | 0 | 0.01077081 | 0         | 9  | 1 | 1.01542894 | 0.30102999 |
| chr6 | 53166598 | 53207323 | 40726  | 1  | 4 | 0 | 0.02074938 | 0         | 8  | 1 | 0.79906872 | 0.30102999 |
| chr6 | 53207323 | 53277044 | 69722  | 1  | 3 | 0 | 0.01598258 | 0         | 7  | 1 | 0.84395715 | 0.30102999 |
| chr6 | 53277044 | 53363094 | 86051  | 3  | 4 | 0 | 0.02074938 | 0         | 8  | 1 | 0.79906872 | 0.30102999 |
| chr6 | 53363094 | 53394023 | 30930  | 1  | 3 | 0 | 0.01598258 | 0         | 7  | 1 | 0.84395715 | 0.30102999 |
| chr6 | 53394023 | 53555361 | 161339 | 2  | 2 | 0 | 0.00493743 | 0         | 7  | 1 | 1.16581773 | 0.30102999 |
| chr6 | 53555361 | 53662780 | 107420 | 2  | 3 | 0 | 0.01598258 | 0         | 7  | 1 | 0.84395715 | 0.30102999 |
| chr6 | 53662780 | 53687073 | 24294  | 1  | 3 | 0 | 0.03070643 | 0         | 6  | 1 | 0.63695542 | 0.30102999 |
| chr6 | 53687073 | 53687132 | 60     | 1  | 4 | 0 | 0.03812622 | 0         | 7  | 1 | 0.60763643 | 0.30102999 |
| chr6 | 53687132 | 53713420 | 26289  | 1  | 2 | 0 | 0.01053319 | 0         | 6  | 1 | 0.91219088 | 0.30102999 |
| chr6 | 53713420 | 53713479 | 60     | 1  | 2 | 0 | 0.00493743 | 0         | 7  | 1 | 1.16581773 | 0.30102999 |
| chr6 | 53713479 | 53767421 | 53943  | 1  | 2 | 0 | 0.01053319 | 0         | 6  | 1 | 0.91219088 | 0.30102999 |
| chr6 | 53767421 | 53767480 | 60     | 1  | 2 | 0 | 0.00493743 | 0         | 7  | 1 | 1.16581773 | 0.30102999 |
| chr6 | 53767480 |          |        |    |   |   |            |           |    |   |            |            |

|      |          |          |          |        |   |   |            |            |    |   |            |            |
|------|----------|----------|----------|--------|---|---|------------|------------|----|---|------------|------------|
| chr6 | 55625277 | 55659244 | 33968    | 2      | 5 | 1 | 0.01320236 | 0.30102999 | 10 | 0 | 0.97390707 | 0          |
| chr6 | 55659244 | 55711436 | 52193    | 2      | 5 | 1 | 0.02473314 | 0.30102999 | 9  | 0 | 0.67806864 | 0          |
| chr6 | 55711436 | 55864341 | 152906   | 2      | 4 | 0 | 0.02074938 | 0          | 8  | 0 | 0.79906872 | 0          |
| chr6 | 55864341 | 55864400 | 60       | 1      | 5 | 0 | 0.01320236 | 0          | 10 | 0 | 0.97390707 | 0          |
| chr6 | 55864400 | 55955844 | 91445    | 2      | 5 | 0 | 0.07511598 | 0          | 7  | 0 | 0.43181735 | 0          |
| chr6 | 55955844 | 55955903 | 60       | 1      | 5 | 0 | 0.02473314 | 0          | 9  | 0 | 0.67806864 | 0          |
| chr6 | 55955903 | 55990444 | 34542    | 1      | 5 | 0 | 0.04407615 | 0          | 8  | 0 | 0.58747015 | 0          |
| chr6 | 55990444 | 56091285 | 100842   | 2      | 4 | 0 | 0.02074938 | 0          | 8  | 0 | 0.79906872 | 0          |
| chr6 | 56091285 | 56091344 | 60       | 1      | 6 | 0 | 0.01518174 | 0          | 11 | 1 | 0.9449689  | 0.30102999 |
| chr6 | 56091344 | 56122219 | 120876   | 2      | 3 | 0 | 0.00170589 | 0          | 10 | 1 | 1.61091002 | 0.30102999 |
| chr6 | 56122219 | 56252017 | 39799    | 2      | 4 | 0 | 0.00530919 | 0          | 10 | 1 | 1.2568129  | 0.30102999 |
| chr6 | 56252017 | 56232554 | 71538    | 2      | 5 | 1 | 0.01320236 | 0.1218695  | 10 | 1 | 0.97390707 | 0.1218695  |
| chr6 | 56232554 | 56323613 | 60       | 1      | 5 | 1 | 0.00666883 | 0.1218695  | 11 | 1 | 1.20557689 | 0.1218695  |
| chr6 | 56323613 | 56366197 | 42585    | 1      | 3 | 1 | 0.00170589 | 0.1218695  | 10 | 1 | 1.61091002 | 0.1218695  |
| chr6 | 56366197 | 56433379 | 67183    | 1      | 2 | 1 | 3.90E-04   | 0.1218695  | 10 | 1 | 2.0620585  | 0.1218695  |
| chr6 | 56433379 | 56508516 | 75138    | 2      | 1 | 1 | 4.80E-05   | 0.1218695  | 10 | 1 | 2.6588298  | 0.1218695  |
| chr6 | 56508516 | 56616119 | 107604   | 2      | 1 | 1 | 8.47E-04   | 0.1218695  | 7  | 1 | 1.62048027 | 0.1218695  |
| chr6 | 56616119 | 56682232 | 66114    | 1      | 1 | 0 | 0.00204627 | 0          | 6  | 1 | 1.31360226 | 0.30102999 |
| chr6 | 56682232 | 57075262 | 393031   | 10     | 1 | 0 | 0.00478973 | 0          | 5  | 1 | 1.02643191 | 0.30102999 |
| chr6 | 57075262 | 57149417 | 74156    | 1      | 0 | 0 | 0          | 0          | 5  | 1 | 1.60515106 | 0.30102999 |
| chr6 | 57149417 | 57246889 | 97573    | 3      | 0 | 0 | 0          | 0          | 4  | 0 | 1.26272838 | 0.30102999 |
| chr6 | 57246889 | 57297527 | 50539    | 2      | 2 | 0 | 0          | 0          | 4  | 0 | 1.26272838 | 0          |
| chr6 | 57297527 | 57329882 | 32356    | 2      | 2 | 0 | 0.0429175  | 0          | 4  | 0 | 0.47744371 | 0          |
| chr6 | 57329882 | 57329941 | 60       | 1      | 3 | 0 | 0.10122019 | 0          | 4  | 0 | 0.30102999 | 0          |
| chr6 | 57329941 | 57393140 | 63200    | 1      | 1 | 0 | 0.02438896 | 0          | 3  | 0 | 0.51676182 | 0          |
| chr6 | 57393140 | 57686216 | 293077   | 5      | 1 | 0 | 0.02438896 | 0          | 3  | 1 | 0.51676182 | 0.30102999 |
| chr6 | 57686216 | 58014532 | 328317   | 1      | 1 | 0 | 0.1218695  | 0          | 1  | 0 | 0.1218695  | 0          |
| chr6 | 58014532 | 61982931 | 62367058 | 384128 | 2 | 1 | 0          | 0.30102999 | 4  | 0 | 1.26272838 | 0          |
| chr6 | 61982931 | 62367117 | 60       | 1      | 0 | 1 | 0          | 0.30102999 | 5  | 0 | 1.60515106 | 0          |
| chr6 | 62367117 | 62757818 | 390702   | 8      | 0 | 1 | 0          | 0.30102999 | 4  | 0 | 1.26272838 | 0          |
| chr6 | 62757818 | 62887221 | 129404   | 4      | 0 | 1 | 0          | 0.1218695  | 5  | 1 | 1.60515106 | 0.1218695  |
| chr6 | 62887221 | 62944608 | 57388    | 1      | 0 | 1 | 0          | 0.1218695  | 4  | 1 | 1.26272838 | 0.1218695  |
| chr6 | 62944608 | 63197995 | 253388   | 3      | 0 | 1 | 0          | 0.1218695  | 3  | 1 | 0.93173516 | 0.1218695  |
| chr6 | 63197995 | 63608317 | 410323   | 3      | 0 | 1 | 0          | 0.30102999 | 3  | 0 | 0.93173516 | 0          |
| chr6 | 63608317 | 63608376 | 60       | 1      | 1 | 1 | 0.01091641 | 0.30102999 | 4  | 0 | 0.76005302 | 0          |
| chr6 | 63608376 | 63928733 | 320358   | 2      | 0 | 1 | 0          | 0.30102999 | 4  | 0 | 1.26272838 | 0          |
| chr6 | 63928733 | 63928792 | 60       | 1      | 1 | 1 | 0.01091641 | 0.30102999 | 4  | 0 | 0.76005302 | 0          |
| chr6 | 63928792 | 64016348 | 87557    | 2      | 0 | 0 | 0          | 0          | 3  | 0 | 0.93173516 | 0          |
| chr6 | 64016348 | 64147240 | 130893   | 3      | 1 | 0 | 0.01091641 | 0          | 4  | 0 | 0.76005302 | 0          |
| chr6 | 64147240 | 64212199 | 64960    | 2      | 1 | 0 | 0.02438896 | 0          | 3  | 0 | 0.51676182 | 0          |
| chr6 | 64212199 | 64292547 | 80349    | 2      | 1 | 0 | 0.01091641 | 0          | 4  | 0 | 0.76005302 | 0          |
| chr6 | 64292547 | 64505835 | 213289   | 5      | 1 | 0 | 0.02438896 | 0          | 3  | 0 | 0.51676182 | 0          |
| chr6 | 64505835 | 64619267 | 113433   | 3      | 1 | 0 | 0.01091641 | 0          | 4  | 0 | 0.76005302 | 0          |
| chr6 | 64619267 | 65087308 | 468042   | 1      | 0 | 0 | 0.00478973 | 0          | 5  | 0 | 1.02643191 | 0          |
| chr6 | 65087308 | 65270447 | 183140   | 1      | 0 | 0 | 0          | 0          | 4  | 0 | 1.26272838 | 0          |
| chr6 | 65270447 | 65321229 | 50783    | 2      | 1 | 0 | 0.01091641 | 0          | 4  | 0 | 0.76005302 | 0          |
| chr6 | 65321229 | 65321288 | 60       | 1      | 2 | 0 | 0.0429175  | 0          | 4  | 1 | 0.47744371 | 0.30102999 |
| chr6 | 65321288 | 65495896 | 174609   | 3      | 2 | 0 | 0.0429175  | 0          | 4  | 0 | 0.47744371 | 0          |
| chr6 | 65495896 | 65662415 | 166520   | 2      | 1 | 0 | 0.01091641 | 0          | 4  | 0 | 0.76005302 | 0          |
| chr6 | 65662415 | 65794022 | 131608   | 3      | 2 | 0 | 0.0429175  | 0          | 4  | 0 | 0.47744371 | 0          |
| chr6 | 65794022 | 65972753 | 178732   | 2      | 3 | 0 | 0.05670724 | 0          | 5  | 0 | 0.45545077 | 0          |
| chr6 | 65972753 | 66008616 | 35864    | 2      | 3 | 0 | 0.3070643  | 0          | 6  | 1 | 0.63695542 | 0.30102999 |
| chr6 | 66008616 | 66064180 | 55565    | 1      | 3 | 0 | 0.05670724 | 0          | 5  | 1 | 0.45545077 | 0.30102999 |
| chr6 | 66064180 | 66064239 | 60       | 1      | 3 | 0 | 0.3070643  | 0          | 6  | 1 | 0.63695542 | 0.30102999 |
| chr6 | 66064239 | 66205374 | 141136   | 3      | 3 | 0 | 0.05670724 | 0          | 5  | 1 | 0.45545077 | 0.30102999 |
| chr6 | 66205374 | 66205433 | 60       | 1      | 3 | 0 | 0.3070643  | 0          | 6  | 1 | 0.63695542 | 0.30102999 |
| chr6 | 66205433 | 66280326 | 74894    | 1      | 3 | 0 | 0.10122019 | 0          | 4  | 0 | 0.30102999 | 0          |
| chr6 | 66280326 | 66316494 | 36169    | 2      | 3 | 0 | 0.05670724 | 0          | 5  | 0 | 0.45545077 | 0          |
| chr6 | 66316494 | 66407551 | 91058    | 2      | 3 | 0 | 0.10122019 | 0          | 4  | 0 | 0.30102999 | 0          |
| chr6 | 66407551 | 66407610 | 60       | 1      | 3 | 0 | 0.05670724 | 0          | 5  | 0 | 0.45545077 | 0          |
| chr6 | 66407610 | 66497520 | 89911    | 1      | 2 | 0 | 0.0429175  | 0          | 4  | 0 | 0.47744371 | 0          |
| chr6 | 66497520 | 66536131 | 38612    | 2      | 2 | 0 | 0.02162467 | 0          | 5  | 0 | 0.68214471 | 0          |
| chr6 | 66536131 | 66596815 | 60685    | 1      | 2 | 0 | 0.0429175  | 0          | 4  | 0 | 0.47744371 | 0          |
| chr6 | 66596815 | 67164064 | 567250   | 5      | 1 | 0 | 0.01091641 | 0          | 4  | 0 | 0.76005302 | 0          |
| chr6 | 67164064 | 67396853 | 232790   | 2      | 1 | 0 | 0.02438896 | 0          | 3  | 0 | 0.51676182 | 0          |
| chr6 | 67396853 | 67576468 | 179616   | 1      | 1 | 0 | 0.05404976 | 0          | 2  | 0 | 0.30102999 | 0          |
| chr6 | 67576468 | 68686165 | 1109698  | 8      | 0 | 0 | 0          | 0          | 1  | 0 | 0.30102999 | 0          |
| chr6 | 68686165 | 69053845 | 367681   | 3      | 0 | 1 | 0          | 0.30102999 | 1  | 0 | 0.61140001 | 0          |
| chr6 | 69053845 | 69053904 | 60       | 1      | 2 | 0 | 0.61140001 | 0          | 2  | 0 | 0.61140001 | 0          |
| chr6 | 69053904 | 69346523 | 292620   | 2      | 0 | 1 | 0.30102999 | 0          | 2  | 0 | 0.61140001 | 0          |
| chr6 | 69346523 | 69347332 | 810      | 2      | 0 | 1 | 0.1218695  | 0          | 2  | 1 | 0.61140001 | 0.1218695  |
| chr6 | 69347332 | 69484862 | 137531   | 2      | 0 | 0 | 0          | 0          | 2  | 0 | 0.61140001 | 0          |
| chr6 | 69484862 | 69484921 | 60       | 1      | 2 | 0 | 0.1218695  | 0          | 2  | 1 | 0.61140001 | 0.1218695  |
| chr6 | 69484921 | 69713520 | 228600   | 4      | 0 | 0 | 0          | 0          | 2  | 1 | 0.61140001 | 0.30102999 |
| chr6 | 69713520 | 69772817 | 59298    | 2      | 1 | 0 | 0.05404976 | 0          | 2  | 1 | 0.30102999 | 0.30102999 |
| chr6 | 69772817 | 69772876 | 60       | 1      | 1 | 0 | 0.01091641 | 0          | 4  | 1 | 0.76005302 | 0.30102999 |
| chr6 | 69772876 | 69811169 | 38294    | 1      | 0 | 0 | 0.02438896 | 0          | 3  | 1 | 0.51676182 | 0.30102999 |
| chr6 | 69811169 | 69844050 | 32882    | 1      | 1 | 0 | 0.02438896 | 0          | 3  | 0 | 0.51676182 | 0          |
| chr6 | 69844050 | 69880154 | 36105    | 2      | 1 | 0 | 0.01091641 | 0          | 4  | 0 | 0.76005302 | 0          |
| chr6 | 69880154 | 70071174 | 191021   | 4      | 1 | 0 | 0.00478973 | 0          | 5  | 1 | 1.02643191 | 0.30102999 |
| chr6 | 70071174 | 70386079 | 314906   | 4      | 2 | 0 | 0.02162467 | 0          | 5  | 1 | 0.68214471 | 0.30102999 |
| chr6 | 70386079 | 70386138 | 60       | 1      | 2 | 0 | 0.01053319 | 0          | 6  | 1 | 0.91219088 | 0.30102999 |
| chr6 | 70386138 | 70566080 | 179943   | 4      | 1 | 0 | 0.00204627 | 0          | 6  | 1 | 1.31360226 | 0.30102999 |
| chr6 | 70566080 | 70566139 | 60       | 1      | 2 | 0 | 0.01053319 | 0          | 6  | 1 | 0.91219088 | 0.30102999 |
| chr6 | 70566139 | 71071757 | 505619   | 12     | 1 | 0 | 0.00204627 | 0          | 6  | 1 | 1.31360226 | 0.30102999 |
| chr6 | 71071757 | 71137999 | 160243   | 2      | 0 | 0 | 8.47E-04   | 0          | 7  | 1 | 1.62048027 | 0.30102999 |
| chr6 | 71137999 | 71298394 | 66296    | 5      | 2 | 0 | 0.00493743 | 0          | 7  | 1 | 1.16581773 | 0.30102999 |
| chr6 | 71298394 | 71464771 | 166378   | 4      | 2 | 0 | 0.00221948 | 0          | 8  | 1 | 1.44210395 | 0.30102999 |
| chr6 | 71464771 | 71567306 | 102536   | 3      | 2 | 0 | 0.00493743 | 0          | 7  | 1 | 1.16581773 | 0.30102999 |
| chr6 | 71567306 | 71569123 | 1818     | 2      | 2 | 0 | 0.00221948 | 0          | 8  | 1 | 1.44210395 | 0.30102999 |
| chr6 | 71569123 | 71633035 | 63913    | 2      | 2 | 0 | 0.00493743 | 0          | 7  | 1 | 1.16581773 | 0.30102999 |
| chr6 | 71633035 | 71651793 | 18759    | 2      | 2 | 0 | 0.00221948 | 0          | 8  | 1 | 1.44210395 | 0.30102999 |
| chr6 | 71651793 | 71816253 | 164461   | 2      | 1 | 0 | 3.39E-04   | 0          | 8  | 1 | 1.94674965 | 0.30102999 |
| chr6 | 71816253 | 71816312 | 60       | 1      | 1 | 0 | 1.30E-04   | 0          | 9  | 2 | 2.29264207 | 0.61140001 |
| chr6 | 71816312 | 71879888 | 63577    | 1      | 1 | 0 | 0.00204627 | 0          | 6  | 2 | 1.31360226 | 0.61140001 |
| chr6 | 71879888 | 72003258 | 123371   | 1      | 1 | 0 | 0.00204627 | 0          | 6  | 1 | 1.31360226 | 0.30102999 |
| chr6 | 72003258 | 72003317 | 60       | 1      | 1 | 0 | 3.39E-04   | 0          | 8  | 1 | 1.94674965 | 0.30102999 |
| chr6 | 72003317 | 72043240 | 39924    | 3      | 1 | 0 | 0.00204627 | 0          | 6  | 1 | 1.31360226 | 0.30102999 |
| chr6 | 72043240 | 72098992 | 55753    | 3      | 1 | 0 | 3.39E-04   | 0          | 8  | 1 | 1.94674965 | 0.30102999 |
| chr6 | 72098992 | 72125934 | 26943    | 1      | 1 | 0 |            |            |    |   |            |            |



|      |          |          |         |    |   |   |            |            |   |   |            |            |
|------|----------|----------|---------|----|---|---|------------|------------|---|---|------------|------------|
| chr6 | 74407262 | 74407321 | 60      | 1  | 2 | 0 | 0.0049373  | 0          | 7 | 1 | 1.16581773 | 0.30102999 |
| chr6 | 74407321 | 74468644 | 61324   | 2  | 1 | 0 | 0.00478973 | 0          | 5 | 1 | 1.02643191 | 0.30102999 |
| chr6 | 74468644 | 74528260 | 59617   | 3  | 2 | 0 | 0.02162467 | 0          | 5 | 1 | 0.68214471 | 0.30102999 |
| chr6 | 74528260 | 74890711 | 362452  | 5  | 1 | 0 | 0.00478973 | 0          | 5 | 1 | 1.02643191 | 0.30102999 |
| chr6 | 74890711 | 74973157 | 82447   | 1  | 1 | 0 | 0.01091641 | 0          | 4 | 1 | 0.76005302 | 0.30102999 |
| chr6 | 74973157 | 74973216 | 60      | 1  | 1 | 0 | 0.00478973 | 0          | 5 | 1 | 1.02643191 | 0.30102999 |
| chr6 | 74973216 | 75138045 | 164830  | 2  | 1 | 0 | 0.01091641 | 0          | 4 | 0 | 0.76005302 | 0          |
| chr6 | 75138045 | 75138104 | 60      | 1  | 1 | 0 | 0.00478973 | 0          | 5 | 0 | 1.02643191 | 0          |
| chr6 | 75138104 | 75283958 | 145855  | 2  | 1 | 0 | 0.01091641 | 0          | 4 | 0 | 0.76005302 | 0          |
| chr6 | 75283958 | 75350910 | 66953   | 2  | 1 | 0 | 0.00204627 | 0          | 6 | 0 | 1.31360226 | 0          |
| chr6 | 75350910 | 75560010 | 209101  | 3  | 2 | 0 | 0.0105319  | 0          | 6 | 1 | 0.91219088 | 0.30102999 |
| chr6 | 75560010 | 75705310 | 145301  | 1  | 1 | 0 | 0.00478973 | 0          | 5 | 1 | 1.02643191 | 0.30102999 |
| chr6 | 75705310 | 75705369 | 60      | 1  | 1 | 0 | 0.00478973 | 0          | 5 | 2 | 1.02643191 | 0.61140001 |
| chr6 | 75705369 | 75795148 | 89780   | 1  | 1 | 0 | 0.01091641 | 0          | 4 | 2 | 0.76005302 | 0.61140001 |
| chr6 | 75795148 | 75893111 | 97964   | 4  | 1 | 0 | 0.00478973 | 0          | 5 | 2 | 1.02643191 | 0.61140001 |
| chr6 | 75893111 | 75963130 | 70020   | 4  | 1 | 1 | 0.00478973 | 0.05404976 | 5 | 2 | 1.02643191 | 0.30102999 |
| chr6 | 75963130 | 76072444 | 109315  | 3  | 0 | 0 | 0          | 0          | 4 | 1 | 1.26272838 | 0.30102999 |
| chr6 | 76072444 | 76072679 | 236     | 2  | 1 | 0 | 0.00478973 | 0          | 5 | 2 | 1.02643191 | 0.61140001 |
| chr6 | 76072679 | 76165034 | 92556   | 2  | 0 | 0 | 0          | 0          | 4 | 1 | 1.26272838 | 0.30102999 |
| chr6 | 76165034 | 76551082 | 386049  | 11 | 0 | 0 | 0          | 0          | 4 | 2 | 1.26272838 | 0.61140001 |
| chr6 | 76551082 | 76744026 | 192945  | 5  | 0 | 0 | 0          | 0          | 4 | 1 | 1.26272838 | 0.30102999 |
| chr6 | 76744026 | 76786151 | 42126   | 2  | 0 | 0 | 0          | 0          | 5 | 1 | 1.60515106 | 0.30102999 |
| chr6 | 76786151 | 76869202 | 83052   | 1  | 0 | 0 | 0          | 0          | 4 | 1 | 1.26272838 | 0.30102999 |
| chr6 | 76869202 | 77173382 | 304181  | 2  | 0 | 0 | 0          | 0          | 3 | 1 | 0.93173516 | 0.30102999 |
| chr6 | 77173382 | 77173441 | 60      | 1  | 1 | 0 | 0          | 0          | 5 | 2 | 1.60515106 | 0.61140001 |
| chr6 | 77173441 | 77369645 | 196205  | 2  | 0 | 0 | 0          | 0          | 4 | 0 | 1.26272838 | 0          |
| chr6 | 77369645 | 77575676 | 206032  | 2  | 0 | 0 | 0          | 0          | 1 | 0 | 0.30102999 | 0          |
| chr6 | 77575676 | 77575735 | 60      | 1  | 0 | 0 | 0          | 0          | 2 | 1 | 0.61140001 | 0.30102999 |
| chr6 | 77575735 | 78643149 | 1067415 | 11 | 0 | 0 | 0          | 0          | 1 | 0 | 0.30102999 | 0          |
| chr6 | 78643149 | 78825593 | 182445  | 3  | 0 | 0 | 0          | 0          | 1 | 2 | 0.30102999 | 0.61140001 |
| chr6 | 78825593 | 78825652 | 60      | 1  | 0 | 1 | 0          | 0.05404976 | 1 | 2 | 0.30102999 | 0.30102999 |
| chr6 | 78825652 | 78926616 | 100965  | 1  | 0 | 0 | 0          | 0          | 1 | 2 | 0.30102999 | 0.61140001 |
| chr6 | 78926616 | 79141799 | 215184  | 1  | 0 | 0 | 0          | 0          | 1 | 1 | 0.30102999 | 0.30102999 |
| chr6 | 79141799 | 79326430 | 184632  | 2  | 1 | 0 | 0.02438896 | 0          | 3 | 1 | 0.51676182 | 0.30102999 |
| chr6 | 79326430 | 79571628 | 245199  | 2  | 1 | 0 | 0.01091641 | 0          | 4 | 2 | 0.76005302 | 0.61140001 |
| chr6 | 79571628 | 79735637 | 164010  | 5  | 1 | 0 | 0.00478973 | 0          | 5 | 2 | 1.02643191 | 0.61140001 |
| chr6 | 79735637 | 79910951 | 175315  | 3  | 2 | 0 | 0.01053319 | 0          | 6 | 2 | 0.91219088 | 0.61140001 |
| chr6 | 79910951 | 79911010 | 60      | 1  | 0 | 0 | 0.03070643 | 0          | 6 | 2 | 0.63695542 | 0.61140001 |
| chr6 | 79911010 | 79981068 | 70059   | 2  | 2 | 0 | 0.01053319 | 0          | 6 | 2 | 0.91219088 | 0.61140001 |
| chr6 | 79981068 | 80113727 | 132660  | 2  | 1 | 0 | 0.00204627 | 0          | 6 | 1 | 1.31360226 | 0.30102999 |
| chr6 | 80113727 | 80635984 | 522258  | 11 | 3 | 0 | 0.03070643 | 0          | 6 | 2 | 0.63695542 | 0.61140001 |
| chr6 | 80635984 | 80739840 | 103857  | 1  | 0 | 0 | 0.00204627 | 0          | 6 | 1 | 1.31360226 | 0.30102999 |
| chr6 | 80739840 | 80752027 | 12188   | 2  | 2 | 0 | 0.01053319 | 0          | 6 | 2 | 0.91219088 | 0.61140001 |
| chr6 | 80752027 | 80837316 | 85290   | 2  | 1 | 0 | 0.00204627 | 0          | 6 | 2 | 1.31360226 | 0.61140001 |
| chr6 | 80837316 | 80989674 | 152359  | 2  | 0 | 0 | 0          | 0          | 4 | 1 | 1.26272838 | 0.30102999 |
| chr6 | 80989674 | 81053470 | 63797   | 2  | 0 | 0 | 0          | 0          | 4 | 2 | 1.26272838 | 0.61140001 |
| chr6 | 81053470 | 81091901 | 38432   | 2  | 0 | 0 | 0          | 0          | 5 | 2 | 1.60515106 | 0.61140001 |
| chr6 | 81091901 | 81496783 | 404883  | 4  | 0 | 0 | 0          | 0          | 4 | 1 | 1.26272838 | 0.30102999 |
| chr6 | 81496783 | 81765437 | 268655  | 1  | 0 | 0 | 0          | 0          | 3 | 1 | 0.93173516 | 0.30102999 |
| chr6 | 81765437 | 82004749 | 239313  | 1  | 0 | 0 | 0          | 0          | 2 | 1 | 0.61140001 | 0.30102999 |
| chr6 | 82004749 | 82577829 | 214137  | 4  | 0 | 0 | 0          | 0          | 1 | 0 | 0.30102999 | 0          |
| chr6 | 82577829 | 82840207 | 97302   | 2  | 0 | 0 | 0          | 0          | 2 | 0 | 0.61140001 | 0          |
| chr6 | 82840207 | 82880600 | 40394   | 2  | 0 | 0 | 0          | 0          | 3 | 1 | 0.93173516 | 0.30102999 |
| chr6 | 82880600 | 82901165 | 20566   | 2  | 1 | 0 | 0.01091641 | 0          | 4 | 1 | 0.76005302 | 0.30102999 |
| chr6 | 82901165 | 82901224 | 60      | 1  | 1 | 1 | 0.01091641 | 0.1218695  | 4 | 1 | 0.76005302 | 0.1218695  |
| chr6 | 82901224 | 82943930 | 42707   | 2  | 0 | 0 | 0          | 0.1218695  | 4 | 1 | 1.26272838 | 0.1218695  |
| chr6 | 82943930 | 83575511 | 631582  | 6  | 1 | 1 | 0.00478973 | 0.05404976 | 5 | 2 | 1.02643191 | 0.30102999 |
| chr6 | 83575511 | 83609207 | 33697   | 1  | 1 | 0 | 0.00204627 | 0.02438896 | 6 | 3 | 1.31360226 | 0.51676182 |
| chr6 | 83609207 | 83708198 | 98992   | 3  | 1 | 1 | 0.00204627 | 0.01091641 | 6 | 4 | 1.31360226 | 0.76005302 |
| chr6 | 83708198 | 83838681 | 130484  | 3  | 1 | 1 | 0.01091641 | 0.02438896 | 4 | 3 | 0.76005302 | 0.51676182 |
| chr6 | 83838681 | 83878133 | 39453   | 3  | 1 | 1 | 0.00478973 | 0.01091641 | 5 | 4 | 1.02643191 | 0.76005302 |
| chr6 | 83878133 | 83985531 | 20399   | 3  | 1 | 2 | 0.00478973 | 0.0429175  | 5 | 4 | 1.02643191 | 0.47744371 |
| chr6 | 83985531 | 83963461 | 64931   | 3  | 1 | 1 | 0.00478973 | 0.01091641 | 5 | 4 | 1.02643191 | 0.76005302 |
| chr6 | 83963461 | 84108173 | 144713  | 3  | 1 | 1 | 0.01091641 | 0.01091641 | 4 | 4 | 0.76005302 | 0.76005302 |
| chr6 | 84108173 | 84884683 | 776511  | 17 | 1 | 2 | 0.00478973 | 0.0429175  | 5 | 4 | 1.02643191 | 0.47744371 |
| chr6 | 84884683 | 84910643 | 25961   | 1  | 1 | 1 | 0.01091641 | 0.01091641 | 4 | 4 | 0.76005302 | 0.76005302 |
| chr6 | 84910643 | 84980651 | 70009   | 1  | 0 | 1 | 0          | 0.01091641 | 3 | 3 | 0.93173516 | 0.76005302 |
| chr6 | 84980651 | 84980710 | 60      | 1  | 0 | 2 | 0          | 0.0429175  | 3 | 4 | 0.93173516 | 0.47744371 |
| chr6 | 84980710 | 85220808 | 240099  | 2  | 1 | 0 | 0.01091641 | 0.01091641 | 3 | 4 | 0.93173516 | 0.76005302 |
| chr6 | 85220808 | 85385036 | 164229  | 1  | 2 | 2 | 0.01091641 | 0.0429175  | 4 | 4 | 0.76005302 | 0.47744371 |
| chr6 | 85385036 | 85385095 | 60      | 1  | 1 | 2 | 0.00478973 | 0.0429175  | 5 | 4 | 1.02643191 | 0.47744371 |
| chr6 | 85385095 | 85451167 | 66073   | 1  | 1 | 2 | 0.00478973 | 0.08289318 | 5 | 3 | 1.02643191 | 0.30102999 |
| chr6 | 85451167 | 85566641 | 115475  | 1  | 1 | 0 | 0.00478973 | 0          | 5 | 3 | 1.02643191 | 0.93173516 |
| chr6 | 85566641 | 85566700 | 60      | 1  | 1 | 0 | 0.00478973 | 0          | 5 | 4 | 1.02643191 | 1.26272838 |
| chr6 | 85566700 | 85683552 | 116853  | 1  | 1 | 0 | 0.00478973 | 0          | 5 | 3 | 1.02643191 | 0.93173516 |
| chr6 | 85683552 | 85674222 | 183871  | 1  | 0 | 0 | 0          | 0          | 3 | 3 | 1.60515106 | 0.93173516 |
| chr6 | 85674222 | 85934568 | 67147   | 2  | 0 | 0 | 0.00478973 | 0          | 5 | 4 | 1.02643191 | 1.26272838 |
| chr6 | 85934568 | 86080434 | 145867  | 2  | 0 | 0 | 0          | 0          | 3 | 3 | 1.60515106 | 0.93173516 |
| chr6 | 86080434 | 86080493 | 60      | 1  | 1 | 0 | 0.00478973 | 0          | 5 | 4 | 1.02643191 | 1.26272838 |
| chr6 | 86080493 | 86430805 | 350313  | 9  | 0 | 0 | 0          | 0          | 3 | 3 | 0.93173516 | 0.93173516 |
| chr6 | 86430805 | 86655009 | 224205  | 3  | 0 | 0 | 0          | 0          | 2 | 3 | 0.61140001 | 0.93173516 |
| chr6 | 86655009 | 86754494 | 99486   | 2  | 0 | 0 | 0          | 0          | 2 | 4 | 0.61140001 | 1.26272838 |
| chr6 | 86754494 | 86884296 | 129803  | 2  | 1 | 0 | 0.05404976 | 0          | 2 | 4 | 0.30102999 | 1.26272838 |
| chr6 | 86884296 | 87041125 | 156830  | 3  | 1 | 0 | 0.01091641 | 0          | 4 | 4 | 0.76005302 | 1.26272838 |
| chr6 | 87041125 | 87041184 | 60      | 1  | 1 | 1 | 0.01091641 | 0.01091641 | 4 | 4 | 0.76005302 | 0.76005302 |
| chr6 | 87041184 | 87178844 | 137661  | 1  | 1 | 0 | 0.01091641 | 0          | 4 | 4 | 0.76005302 | 0.93173516 |
| chr6 | 87178844 | 87463929 | 285086  | 5  | 1 | 0 | 0.00204627 | 0          | 6 | 3 | 1.31360226 | 0.93173516 |
| chr6 | 87463929 | 87534787 | 70859   | 2  | 1 | 0 | 0.00204627 | 0          | 6 | 4 | 1.31360226 | 1.26272838 |
| chr6 | 87534787 | 87649685 | 114899  | 2  | 1 | 0 | 0.00478973 | 0          | 5 | 4 | 1.02643191 | 1.26272838 |
| chr6 | 87649685 | 87649744 | 60      | 1  | 1 | 0 | 0.00204627 | 0          | 6 | 4 | 1.31360226 | 1.26272838 |
| chr6 | 87649744 | 87862808 | 213065  | 7  | 1 | 0 | 0.00478973 | 0          | 5 | 4 | 1.02643191 | 1.26272838 |
| chr6 | 87862808 | 87973967 | 111160  | 3  | 1 | 2 | 0.00478973 | 0.0429175  | 5 | 4 | 1.02643191 | 0.47744371 |
| chr6 | 87973967 | 88032817 | 58851   | 2  | 1 | 2 | 0.01091641 | 0.0429175  | 4 | 4 | 0.76005302 | 0.47744371 |
| chr6 | 88032817 | 88255387 | 222571  | 9  | 1 | 2 | 0.01091641 | 0.08289318 | 4 | 3 | 0.76005302 | 0.30102999 |
| chr6 | 88255387 | 88293352 | 37966   | 2  | 1 | 2 | 0.02438896 | 0.08289318 | 3 | 3 | 0.51676182 | 0.30102999 |
| chr6 | 88293352 | 88417066 | 123715  | 6  | 1 | 2 | 0.01091641 | 0.08289318 | 4 | 3 | 0.76005302 | 0.30102999 |
| chr6 | 88417066 | 88569431 | 152366  | 2  | 1 | 2 | 0.01091641 | 0.02438896 | 4 | 3 | 0.760      |            |

|      |           |           |        |    |   |   |            |            |   |   |            |            |
|------|-----------|-----------|--------|----|---|---|------------|------------|---|---|------------|------------|
| chr6 | 93176783  | 9342107   | 165325 | 2  | 0 | 0 | 0          | 0          | 4 | 1 | 1.26272838 | 0.30102999 |
| chr6 | 93342107  | 93502656  | 160550 | 1  | 0 | 0 | 0          | 0          | 3 | 1 | 0.93173516 | 0.30102999 |
| chr6 | 93502656  | 93553893  | 51238  | 2  | 0 | 0 | 0          | 0          | 4 | 1 | 1.26272838 | 0.30102999 |
| chr6 | 93553893  | 93609026  | 55134  | 1  | 0 | 0 | 0          | 0          | 3 | 1 | 0.93173516 | 0.30102999 |
| chr6 | 93609026  | 93720661  | 111636 | 2  | 0 | 1 | 0.1218695  | 0          | 3 | 1 | 0.93173516 | 0.1218695  |
| chr6 | 93720661  | 94091543  | 370883 | 6  | 0 | 0 | 0          | 0          | 2 | 1 | 0.61140001 | 0.30102999 |
| chr6 | 94091543  | 94181249  | 89707  | 4  | 0 | 0 | 0          | 0          | 3 | 1 | 0.93173516 | 0.30102999 |
| chr6 | 94181249  | 94292552  | 111304 | 2  | 0 | 1 | 0.1218695  | 0          | 4 | 1 | 1.26272838 | 0.1218695  |
| chr6 | 94292552  | 94487830  | 195279 | 1  | 0 | 1 | 0.1218695  | 0          | 3 | 1 | 0.93173516 | 0.1218695  |
| chr6 | 94487830  | 94586500  | 98671  | 2  | 0 | 2 | 0.30102999 | 0          | 3 | 1 | 0.93173516 | 0.05404976 |
| chr6 | 94586500  | 94586559  | 60     | 1  | 0 | 2 | 0.1575501  | 0          | 2 | 2 | 0.93173516 | 0.1575501  |
| chr6 | 94586559  | 94783161  | 196603 | 1  | 0 | 1 | 0.1218695  | 0          | 2 | 1 | 0.61140001 | 0.1218695  |
| chr6 | 94783161  | 95078973  | 295813 | 2  | 0 | 0 | 0          | 0          | 1 | 1 | 0.30102999 | 0.30102999 |
| chr6 | 95078973  | 95079032  | 60     | 1  | 0 | 2 | 0.30102999 | 0          | 2 | 1 | 0.61140001 | 0.05404976 |
| chr6 | 95079032  | 95148784  | 69753  | 1  | 0 | 0 | 0          | 0          | 2 | 1 | 0.61140001 | 0.30102999 |
| chr6 | 95148784  | 95584631  | 166906 | 2  | 0 | 0 | 0          | 0          | 2 | 0 | 0.61140001 | 0.30102999 |
| chr6 | 95584631  | 95584690  | 60     | 1  | 0 | 0 | 0          | 0          | 4 | 1 | 1.26272838 | 0.30102999 |
| chr6 | 95584690  | 96037310  | 452621 | 5  | 0 | 0 | 0          | 0          | 3 | 0 | 0.93173516 | 0.30102999 |
| chr6 | 96037310  | 96400185  | 362876 | 2  | 1 | 0 | 0.01091641 | 0          | 4 | 1 | 0.76005302 | 0.30102999 |
| chr6 | 96400185  | 96400244  | 60     | 1  | 1 | 1 | 0.00478973 | 0.05404976 | 5 | 2 | 1.02643191 | 0.30102999 |
| chr6 | 96400244  | 96533522  | 133279 | 4  | 1 | 1 | 0.01091641 | 0.1218695  | 4 | 1 | 0.76005302 | 0.1218695  |
| chr6 | 96533522  | 96559198  | 35669  | 2  | 1 | 2 | 0.01091641 | 0.1575501  | 4 | 1 | 0.76005302 | 0.1575501  |
| chr6 | 96559198  | 96842882  | 273693 | 3  | 1 | 1 | 0.01091641 | 0.05404976 | 4 | 2 | 0.76005302 | 0.30102999 |
| chr6 | 96842882  | 96976463  | 133582 | 2  | 2 | 2 | 0.00493743 | 0.1575501  | 7 | 2 | 1.16581773 | 0.1575501  |
| chr6 | 96976463  | 96976522  | 60     | 1  | 2 | 2 | 0.00493743 | 0.08289318 | 7 | 3 | 1.16581773 | 0.30102999 |
| chr6 | 96976522  | 96984286  | 7765   | 1  | 2 | 2 | 0.01053319 | 0.08289318 | 6 | 3 | 0.91219088 | 0.30102999 |
| chr6 | 96984286  | 97010479  | 26194  | 1  | 2 | 1 | 0.01053319 | 0.1218695  | 6 | 1 | 0.91219088 | 0.1218695  |
| chr6 | 97010479  | 97010537  | 59     | 1  | 1 | 1 | 0.00493743 | 0.1218695  | 7 | 1 | 1.16581773 | 0.1218695  |
| chr6 | 97010537  | 97163116  | 152580 | 3  | 2 | 0 | 0.00493743 | 0          | 7 | 1 | 1.16581773 | 0.30102999 |
| chr6 | 97163116  | 97446683  | 283568 | 7  | 3 | 0 | 0.01598258 | 0          | 7 | 1 | 0.84395715 | 0.30102999 |
| chr6 | 97446683  | 97489438  | 42756  | 1  | 2 | 0 | 0.01053319 | 0          | 6 | 1 | 0.91219088 | 0.30102999 |
| chr6 | 97489438  | 98035068  | 545631 | 13 | 2 | 0 | 0.01053319 | 0          | 6 | 2 | 0.91219088 | 0.61140001 |
| chr6 | 98035068  | 98035127  | 60     | 1  | 2 | 0 | 0.01053319 | 0          | 6 | 3 | 0.91219088 | 0.93173516 |
| chr6 | 98035127  | 98124957  | 89831  | 1  | 1 | 0 | 0.00478973 | 0          | 5 | 1 | 1.02643191 | 0.30102999 |
| chr6 | 98124957  | 98219291  | 94335  | 1  | 1 | 0 | 0.01091641 | 0          | 4 | 1 | 0.76005302 | 0.30102999 |
| chr6 | 98219291  | 98219350  | 60     | 1  | 0 | 0 | 0.00478973 | 0          | 5 | 2 | 1.02643191 | 0.61140001 |
| chr6 | 98219350  | 98319087  | 99738  | 1  | 1 | 0 | 0.00478973 | 0          | 5 | 1 | 1.02643191 | 0.30102999 |
| chr6 | 98319087  | 98319146  | 60     | 1  | 0 | 0 | 0.00204627 | 0          | 6 | 3 | 1.31360226 | 0.93173516 |
| chr6 | 98319146  | 98463256  | 144111 | 1  | 1 | 0 | 0.05404976 | 0          | 2 | 2 | 0.30102999 | 0.61140001 |
| chr6 | 98463256  | 98726579  | 263324 | 2  | 1 | 0 | 0.1218695  | 0          | 1 | 0 | 0.1218695  | 0          |
| chr6 | 98726579  | 99082388  | 355810 | 3  | 1 | 0 | 0.1218695  | 0          | 1 | 1 | 0.1218695  | 0.30102999 |
| chr6 | 99082388  | 99082447  | 60     | 1  | 0 | 0 | 0.02162467 | 0          | 5 | 3 | 0.68214471 | 0.93173516 |
| chr6 | 99082447  | 99284234  | 201788 | 3  | 1 | 0 | 0.02438896 | 0          | 3 | 3 | 0.51676182 | 0.93173516 |
| chr6 | 99284234  | 99285919  | 1686   | 1  | 0 | 0 | 0.01091641 | 0          | 4 | 3 | 0.76005302 | 0.93173516 |
| chr6 | 99285919  | 99394111  | 108193 | 2  | 1 | 0 | 0.05404976 | 0          | 2 | 3 | 0.30102999 | 0.93173516 |
| chr6 | 99394111  | 99394170  | 60     | 1  | 1 | 1 | 0.01091641 | 0.01091641 | 4 | 4 | 0.76005302 | 0.76005302 |
| chr6 | 99394170  | 99461950  | 67781  | 1  | 1 | 1 | 0.02438896 | 0.02438896 | 3 | 3 | 0.51676182 | 0.51676182 |
| chr6 | 99461950  | 99609664  | 147715 | 1  | 1 | 0 | 0.05404976 | 0.02438896 | 2 | 3 | 0.30102999 | 0.51676182 |
| chr6 | 99609664  | 99609723  | 60     | 1  | 2 | 2 | 0.02438896 | 0.0429175  | 4 | 4 | 0.51676182 | 0.47744371 |
| chr6 | 99609723  | 99728805  | 119083 | 1  | 1 | 1 | 0.02438896 | 0.02438896 | 3 | 3 | 0.51676182 | 0.51676182 |
| chr6 | 99728805  | 99817320  | 88516  | 1  | 1 | 1 | 0.01091641 | 0.02438896 | 4 | 3 | 0.76005302 | 0.51676182 |
| chr6 | 99817320  | 99817473  | 154    | 2  | 2 | 0 | 0.01091641 | 0.08289318 | 4 | 3 | 0.76005302 | 0.30102999 |
| chr6 | 99817473  | 99872538  | 55066  | 2  | 1 | 1 | 0.01091641 | 0.02438896 | 4 | 3 | 0.76005302 | 0.51676182 |
| chr6 | 99872538  | 99891473  | 18936  | 2  | 1 | 2 | 0.01091641 | 0.08289318 | 4 | 3 | 0.76005302 | 0.30102999 |
| chr6 | 99891473  | 99961506  | 70034  | 2  | 1 | 1 | 0.02438896 | 0.02438896 | 3 | 3 | 0.51676182 | 0.51676182 |
| chr6 | 99961506  | 100260928 | 299423 | 7  | 1 | 2 | 0.00478973 | 0.0429175  | 5 | 4 | 1.02643191 | 0.47744371 |
| chr6 | 100260928 | 100415543 | 154616 | 3  | 2 | 2 | 0.02162467 | 0.0429175  | 5 | 4 | 0.68214471 | 0.47744371 |
| chr6 | 100415543 | 100415602 | 60     | 1  | 2 | 2 | 0.01053319 | 0.0429175  | 6 | 4 | 0.91219088 | 0.47744371 |
| chr6 | 100415602 | 100510551 | 94950  | 2  | 2 | 2 | 0.02162467 | 0.0429175  | 5 | 4 | 0.68214471 | 0.47744371 |
| chr6 | 100510551 | 100510610 | 60     | 1  | 2 | 2 | 0.01053319 | 0.0429175  | 6 | 4 | 0.91219088 | 0.47744371 |
| chr6 | 100510610 | 100642782 | 132173 | 2  | 2 | 2 | 0.02162467 | 0.0429175  | 5 | 4 | 0.68214471 | 0.47744371 |
| chr6 | 100642782 | 100794653 | 151872 | 2  | 2 | 2 | 0.01053319 | 0.0429175  | 4 | 4 | 0.91219088 | 0.47744371 |
| chr6 | 100794653 | 100794712 | 60     | 1  | 3 | 3 | 0.01053319 | 0.30122019 | 6 | 4 | 0.91219088 | 0.30102999 |
| chr6 | 100794712 | 100957238 | 162527 | 4  | 2 | 2 | 0.00204627 | 0.0429175  | 6 | 4 | 1.31360226 | 0.47744371 |
| chr6 | 100957238 | 101099518 | 142281 | 3  | 1 | 2 | 0.00478973 | 0.08289318 | 3 | 3 | 1.02643191 | 0.30102999 |
| chr6 | 101099518 | 101151700 | 52183  | 1  | 2 | 2 | 0.00478973 | 0.1575501  | 2 | 2 | 1.02643191 | 0.1575501  |
| chr6 | 101151700 | 101151759 | 60     | 1  | 1 | 2 | 0.00204627 | 0.1575501  | 6 | 2 | 1.31360226 | 0.1575501  |
| chr6 | 101151759 | 101200326 | 48568  | 1  | 1 | 0 | 0.00204627 | 0          | 6 | 2 | 1.31360226 | 0.61140001 |
| chr6 | 101200326 | 101254389 | 54064  | 2  | 2 | 0 | 0.01053319 | 0          | 6 | 2 | 0.91219088 | 0.61140001 |
| chr6 | 101254389 | 101318404 | 64016  | 3  | 2 | 0 | 0.0429175  | 0          | 4 | 2 | 0.47744371 | 0.61140001 |
| chr6 | 101318404 | 101401778 | 83375  | 2  | 0 | 4 | 0.0429175  | 0          | 4 | 1 | 0.47744371 | 0.30102999 |
| chr6 | 101401778 | 101401837 | 60     | 1  | 2 | 2 | 0.02162467 | 0.30102999 | 5 | 1 | 0.68214471 | 0.05404976 |
| chr6 | 101401837 | 101568080 | 166244 | 1  | 2 | 1 | 0.0429175  | 0.30102999 | 4 | 0 | 0.47744371 | 0          |
| chr6 | 101568080 | 101568139 | 60     | 1  | 3 | 1 | 0.01022019 | 0.30102999 | 4 | 0 | 0.30102999 | 0          |
| chr6 | 101568139 | 101737120 | 168982 | 1  | 2 | 1 | 0.0429175  | 0.30102999 | 4 | 0 | 0.47744371 | 0          |
| chr6 | 101737120 | 101944677 | 207558 | 2  | 1 | 1 | 0.01091641 | 0.30102999 | 4 | 0 | 0.76005302 | 0          |
| chr6 | 101944677 | 101944736 | 60     | 1  | 2 | 0 | 0.01091641 | 0.61140001 | 4 | 0 | 0.76005302 | 0          |
| chr6 | 101944736 | 102192907 | 248172 | 5  | 1 | 1 | 0.01091641 | 0.30102999 | 4 | 0 | 0.76005302 | 0          |
| chr6 | 102192907 | 102444345 | 251439 | 4  | 1 | 0 | 0.01091641 | 0          | 4 | 0 | 0.76005302 | 0          |
| chr6 | 102444345 | 102513743 | 69399  | 3  | 2 | 0 | 0.0429175  | 0          | 4 | 0 | 0.47744371 | 0          |
| chr6 | 102513743 | 102772530 | 258788 | 2  | 1 | 0 | 0.01091641 | 0          | 4 | 0 | 0.76005302 | 0          |
| chr6 | 102772530 | 102931873 | 159444 | 2  | 1 | 1 | 0.01091641 | 0.30102999 | 4 | 0 | 0.76005302 | 0          |
| chr6 | 102931873 | 103179934 | 248062 | 0  | 0 | 1 | 0.30102999 | 0          | 4 | 0 | 1.26272838 | 0          |
| chr6 | 103179934 | 103405100 | 225167 | 2  | 0 | 1 | 0.30102999 | 0          | 2 | 0 | 0.61140001 | 0          |
| chr6 | 103405100 | 104454132 | 316404 | 3  | 0 | 0 | 0          | 0          | 3 | 0 | 0.93173516 | 0          |
| chr6 | 104454132 | 104564985 | 110854 | 2  | 0 | 0 | 0          | 0          | 4 | 0 | 1.26272838 | 0          |
| chr6 | 104564985 | 104815168 | 250184 | 3  | 0 | 1 | 0.30102999 | 0          | 4 | 0 | 1.26272838 | 0          |
| chr6 | 104815168 | 104978927 | 163760 | 2  | 1 | 1 | 0.01091641 | 0.30102999 | 4 | 0 | 0.76005302 | 0          |
| chr6 | 104978927 | 105133746 | 154820 | 2  | 2 | 1 | 0.0429175  | 0.30102999 | 4 | 0 | 0.47744371 | 0          |
| chr6 | 105133746 | 105133805 | 60     | 1  | 2 | 1 | 0.02162467 | 0.1218695  | 5 | 1 | 0.68214471 | 0.1218695  |
| chr6 | 105133805 | 105306830 | 173026 | 5  | 2 | 0 | 0.02162467 | 0          | 5 | 0 | 0.68214471 | 0          |
| chr6 | 105306830 | 105548869 | 242040 | 6  | 2 | 0 | 0.02162467 | 0          | 5 | 1 | 0.68214471 | 0.30102999 |
| chr6 | 105548869 | 106127139 | 578271 | 9  | 2 | 0 | 0.01053319 | 0          | 6 | 1 | 0.91219088 | 0.30102999 |
| chr6 | 106127139 | 106127198 | 60     | 1  | 2 | 0 | 0.00493743 | 0          | 7 | 1 | 1.16581773 | 0.30102999 |
| chr6 | 106127198 | 106257017 | 129820 | 1  | 2 | 0 | 0.01053319 | 0          | 6 | 1 | 0.91219088 | 0.         |

|      |           |           |        |    |   |   |            |            |   |   |            |            |
|------|-----------|-----------|--------|----|---|---|------------|------------|---|---|------------|------------|
| chr6 | 108488469 | 108509490 | 21022  | 2  | 3 | 2 | 0.05670724 | 0.0828918  | 5 | 3 | 0.45545077 | 0.30102999 |
| chr6 | 108509490 | 108645210 | 135721 | 4  | 3 | 2 | 0.10122019 | 0.0828918  | 4 | 3 | 0.30102999 | 0.30102999 |
| chr6 | 108645210 | 108729564 | 84355  | 2  | 3 | 2 | 0.17593012 | 0.0828918  | 3 | 3 | 0.17593012 | 0.30102999 |
| chr6 | 108729564 | 108729623 | 60     | 1  | 3 | 2 | 0.10122019 | 0.0828918  | 4 | 3 | 0.30102999 | 0.30102999 |
| chr6 | 108729623 | 108768497 | 38875  | 1  | 2 | 2 | 0.0429175  | 0.0828918  | 4 | 3 | 0.47744371 | 0.30102999 |
| chr6 | 108768497 | 109066059 | 297563 | 7  | 2 | 2 | 0.0828918  | 0.1575501  | 3 | 2 | 0.30102999 | 0.1575501  |
| chr6 | 109066059 | 109066118 | 60     | 1  | 2 | 3 | 0.0828918  | 0.30102999 | 3 | 2 | 0.30102999 | 0.0828918  |
| chr6 | 109066118 | 109121485 | 55368  | 1  | 2 | 2 | 0.0828918  | 0.1575501  | 3 | 2 | 0.30102999 | 0.1575501  |
| chr6 | 109121485 | 109121544 | 60     | 1  | 2 | 2 | 0.0429175  | 0.1575501  | 4 | 2 | 0.47744371 | 0.1575501  |
| chr6 | 109121544 | 10925480  | 103937 | 3  | 2 | 2 | 0.0828918  | 0.1575501  | 3 | 2 | 0.30102999 | 0.1575501  |
| chr6 | 10925480  | 109249282 | 23803  | 2  | 2 | 2 | 0.0429175  | 0.1575501  | 4 | 2 | 0.47744371 | 0.1575501  |
| chr6 | 109249282 | 109249341 | 60     | 1  | 3 | 2 | 0.10122019 | 0.1575501  | 4 | 2 | 0.30102999 | 0.1575501  |
| chr6 | 109249341 | 109334883 | 85543  | 2  | 2 | 2 | 0.0828918  | 0.1575501  | 3 | 2 | 0.30102999 | 0.1575501  |
| chr6 | 109334883 | 109450490 | 115608 | 4  | 3 | 2 | 0.17593012 | 0.1575501  | 3 | 2 | 0.17593012 | 0.1575501  |
| chr6 | 109450490 | 109450549 | 60     | 1  | 3 | 2 | 0.10122019 | 0.1575501  | 4 | 2 | 0.30102999 | 0.1575501  |
| chr6 | 109450549 | 109634985 | 184437 | 3  | 2 | 2 | 0.0828918  | 0.1575501  | 3 | 2 | 0.30102999 | 0.1575501  |
| chr6 | 109634985 | 109692872 | 57888  | 2  | 2 | 3 | 0.0828918  | 0.30102999 | 3 | 2 | 0.30102999 | 0.0828918  |
| chr6 | 109692872 | 109721292 | 28421  | 2  | 2 | 3 | 0.0429175  | 0.30102999 | 4 | 2 | 0.47744371 | 0.0828918  |
| chr6 | 109721292 | 109801874 | 80583  | 2  | 2 | 2 | 0.0429175  | 0.1575501  | 4 | 2 | 0.47744371 | 0.1575501  |
| chr6 | 109801874 | 109820288 | 18415  | 2  | 2 | 3 | 0.0429175  | 0.30102999 | 4 | 2 | 0.47744371 | 0.0828918  |
| chr6 | 109820288 | 110064342 | 244055 | 5  | 2 | 2 | 0.0429175  | 0.1575501  | 4 | 2 | 0.47744371 | 0.1575501  |
| chr6 | 110064342 | 110123960 | 59619  | 1  | 2 | 2 | 0.0828918  | 0.1575501  | 3 | 2 | 0.30102999 | 0.1575501  |
| chr6 | 110123960 | 110124019 | 60     | 1  | 2 | 3 | 0.0828918  | 0.30102999 | 3 | 2 | 0.30102999 | 0.0828918  |
| chr6 | 110124019 | 110243528 | 119510 | 2  | 2 | 2 | 0.0828918  | 0.1575501  | 3 | 2 | 0.30102999 | 0.1575501  |
| chr6 | 110243528 | 110301858 | 58331  | 1  | 2 | 2 | 0.0828918  | 0.05404976 | 3 | 2 | 0.30102999 | 0.30102999 |
| chr6 | 110301858 | 110434581 | 132724 | 2  | 2 | 3 | 0.0828918  | 0.1218695  | 3 | 1 | 0.30102999 | 0.1218695  |
| chr6 | 110434581 | 110481954 | 47374  | 2  | 2 | 1 | 0.0429175  | 0.1218695  | 4 | 1 | 0.47744371 | 0.1218695  |
| chr6 | 110481954 | 110575427 | 93474  | 2  | 1 | 1 | 0.0828918  | 0.1218695  | 3 | 1 | 0.30102999 | 0.1218695  |
| chr6 | 110575427 | 110607187 | 31761  | 2  | 2 | 1 | 0.0429175  | 0.1218695  | 4 | 1 | 0.47744371 | 0.1218695  |
| chr6 | 110607187 | 110720327 | 113141 | 3  | 2 | 1 | 0.0429175  | 0.05404976 | 4 | 2 | 0.47744371 | 0.30102999 |
| chr6 | 110720327 | 110727203 | 6877   | 2  | 2 | 2 | 0.0429175  | 0.1575501  | 4 | 2 | 0.47744371 | 0.1575501  |
| chr6 | 110727203 | 110869110 | 141908 | 3  | 2 | 2 | 0.0429175  | 0.05404976 | 4 | 2 | 0.47744371 | 0.30102999 |
| chr6 | 110869110 | 110869169 | 60     | 1  | 2 | 2 | 0.0429175  | 0.1575501  | 4 | 2 | 0.47744371 | 0.1575501  |
| chr6 | 110869169 | 110932222 | 63054  | 2  | 2 | 1 | 0.0429175  | 0.05404976 | 4 | 2 | 0.47744371 | 0.30102999 |
| chr6 | 110932222 | 110985114 | 52893  | 2  | 2 | 1 | 0.0828918  | 0.05404976 | 3 | 2 | 0.30102999 | 0.30102999 |
| chr6 | 110985114 | 111212812 | 227699 | 7  | 2 | 1 | 0.0429175  | 0.05404976 | 4 | 2 | 0.47744371 | 0.30102999 |
| chr6 | 111212812 | 111286981 | 74170  | 3  | 2 | 2 | 0.0429175  | 0.1575501  | 4 | 2 | 0.47744371 | 0.1575501  |
| chr6 | 111286981 | 111321617 | 34637  | 1  | 2 | 1 | 0.0429175  | 0.05404976 | 4 | 2 | 0.47744371 | 0.30102999 |
| chr6 | 111321617 | 111371082 | 49466  | 2  | 2 | 1 | 0.02162467 | 0.05404976 | 5 | 2 | 0.68214471 | 0.30102999 |
| chr6 | 111371082 | 111426241 | 55160  | 1  | 2 | 1 | 0.0429175  | 0.05404976 | 4 | 2 | 0.47744371 | 0.30102999 |
| chr6 | 111426241 | 111768179 | 341939 | 14 | 2 | 2 | 0.0429175  | 0.1575501  | 4 | 2 | 0.47744371 | 0.1575501  |
| chr6 | 111768179 | 111936808 | 168630 | 4  | 2 | 2 | 0.02162467 | 0.1575501  | 5 | 2 | 0.68214471 | 0.1575501  |
| chr6 | 111936808 | 112167791 | 230984 | 5  | 2 | 2 | 0.0429175  | 0.1575501  | 4 | 2 | 0.47744371 | 0.1575501  |
| chr6 | 112167791 | 112167850 | 60     | 1  | 2 | 2 | 0.02162467 | 0.1575501  | 5 | 2 | 0.68214471 | 0.1575501  |
| chr6 | 112167850 | 112486396 | 318547 | 8  | 2 | 2 | 0.0429175  | 0.1575501  | 4 | 2 | 0.47744371 | 0.1575501  |
| chr6 | 112486396 | 112574984 | 88589  | 2  | 2 | 2 | 0.0828918  | 0.1575501  | 3 | 2 | 0.30102999 | 0.1575501  |
| chr6 | 112574984 | 112606743 | 31760  | 2  | 2 | 2 | 0.0429175  | 0.1575501  | 4 | 2 | 0.47744371 | 0.1575501  |
| chr6 | 112606743 | 112763483 | 156741 | 2  | 2 | 2 | 0.0828918  | 0.1575501  | 3 | 2 | 0.30102999 | 0.1575501  |
| chr6 | 112763483 | 112763542 | 60     | 1  | 3 | 2 | 0.17593012 | 0.1575501  | 3 | 2 | 0.17593012 | 0.1575501  |
| chr6 | 112763542 | 113044405 | 280864 | 2  | 2 | 2 | 0.1575501  | 0.1575501  | 2 | 2 | 0.1575501  | 0.1575501  |
| chr6 | 113044405 | 113141536 | 97132  | 2  | 2 | 2 | 0.0828918  | 0.1575501  | 3 | 2 | 0.30102999 | 0.1575501  |
| chr6 | 113141536 | 113141595 | 60     | 1  | 2 | 3 | 0.0828918  | 0.30102999 | 3 | 2 | 0.30102999 | 0.0828918  |
| chr6 | 113141595 | 113301556 | 159962 | 1  | 2 | 3 | 0.1575501  | 0.30102999 | 2 | 2 | 0.1575501  | 0.0828918  |
| chr6 | 113301556 | 113381983 | 80428  | 1  | 2 | 2 | 0.1575501  | 0.1575501  | 2 | 2 | 0.1575501  | 0.1575501  |
| chr6 | 113381983 | 113579004 | 197022 | 2  | 2 | 1 | 0.1575501  | 0.1218695  | 2 | 1 | 0.1575501  | 0.1218695  |
| chr6 | 113579004 | 113579063 | 60     | 1  | 2 | 1 | 0.0429175  | 0.1218695  | 4 | 1 | 0.47744371 | 0.1218695  |
| chr6 | 113579063 | 113904236 | 325174 | 2  | 2 | 2 | 0.1575501  | 0.1218695  | 2 | 1 | 0.1575501  | 0.1218695  |
| chr6 | 113904236 | 114179637 | 275402 | 4  | 2 | 0 | 0.1575501  | 0          | 2 | 1 | 0.1575501  | 0.30102999 |
| chr6 | 114179637 | 114376864 | 197228 | 7  | 2 | 1 | 0.1575501  | 0.1218695  | 2 | 1 | 0.1575501  | 0.1218695  |
| chr6 | 114376864 | 114940863 | 564000 | 7  | 2 | 0 | 0.1575501  | 0          | 2 | 1 | 0.1575501  | 0.30102999 |
| chr6 | 114940863 | 115190171 | 249309 | 3  | 2 | 2 | 0.1575501  | 0.1218695  | 2 | 1 | 0.1575501  | 0.1218695  |
| chr6 | 115190171 | 115701467 | 511297 | 2  | 1 | 0 | 0.05404976 | 0          | 2 | 0 | 0.30102999 | 0          |
| chr6 | 115701467 | 115701526 | 60     | 1  | 2 | 1 | 0.30102999 | 0.30102999 | 2 | 0 | 0.0828918  | 0          |
| chr6 | 115701526 | 115985253 | 283728 | 2  | 2 | 1 | 0.1575501  | 0.30102999 | 2 | 0 | 0.1575501  | 0.30102999 |
| chr6 | 115985253 | 115985312 | 60     | 1  | 2 | 2 | 0.1575501  | 0.1575501  | 2 | 1 | 0.1575501  | 0.05404976 |
| chr6 | 115985312 | 116254497 | 140186 | 1  | 1 | 2 | 0.05404976 | 0.30102999 | 2 | 1 | 0.30102999 | 0.05404976 |
| chr6 | 116254497 | 116267708 | 137312 | 2  | 2 | 1 | 0.02438896 | 0.1575501  | 3 | 2 | 0.51676182 | 0.1575501  |
| chr6 | 116267708 | 116289909 | 27202  | 2  | 2 | 2 | 0.0429175  | 0.1575501  | 4 | 2 | 0.47744371 | 0.1575501  |
| chr6 | 116289909 | 116480091 | 190183 | 4  | 2 | 2 | 0.1575501  | 0.1575501  | 2 | 2 | 0.1575501  | 0.1575501  |
| chr6 | 116480091 | 116698123 | 218033 | 7  | 3 | 2 | 0.30102999 | 0.1575501  | 2 | 2 | 0.0828918  | 0.1575501  |
| chr6 | 116698123 | 116804635 | 106513 | 3  | 3 | 2 | 0.30102999 | 0.0828918  | 2 | 2 | 0.0828918  | 0.30102999 |
| chr6 | 116804635 | 116804694 | 60     | 1  | 2 | 2 | 0.10122019 | 0.0828918  | 4 | 3 | 0.30102999 | 0.30102999 |
| chr6 | 116804694 | 117454715 | 650022 | 12 | 3 | 2 | 0.17593012 | 0.0828918  | 3 | 3 | 0.17593012 | 0.30102999 |
| chr6 | 117454715 | 117629934 | 175220 | 3  | 2 | 2 | 0.0828918  | 0.0828918  | 3 | 3 | 0.30102999 | 0.30102999 |
| chr6 | 117629934 | 117681198 | 51265  | 3  | 3 | 2 | 0.17593012 | 0.0828918  | 3 | 3 | 0.17593012 | 0.30102999 |
| chr6 | 117681198 | 117824987 | 143790 | 3  | 2 | 2 | 0.0828918  | 0.0828918  | 3 | 3 | 0.30102999 | 0.30102999 |
| chr6 | 117824987 | 117846542 | 21556  | 1  | 2 | 2 | 0.1575501  | 0.0828918  | 2 | 3 | 0.1575501  | 0.30102999 |
| chr6 | 117846542 | 117901307 | 54766  | 4  | 3 | 2 | 0.30102999 | 0.0828918  | 2 | 3 | 0.0828918  | 0.30102999 |
| chr6 | 117901307 | 117955439 | 54133  | 1  | 3 | 1 | 0.30102999 | 0.02438896 | 2 | 2 | 0.0828918  | 0.51676182 |
| chr6 | 117955439 | 118202946 | 247508 | 3  | 2 | 1 | 0.1575501  | 0.05404976 | 2 | 2 | 0.1575501  | 0.30102999 |
| chr6 | 118202946 | 118203005 | 60     | 1  | 2 | 1 | 0.0828918  | 0.05404976 | 3 | 2 | 0.30102999 | 0.30102999 |
| chr6 | 118203005 | 118270842 | 67838  | 1  | 2 | 1 | 0.1575501  | 0.05404976 | 2 | 2 | 0.1575501  | 0.30102999 |
| chr6 | 118270842 | 118337197 | 66356  | 2  | 2 | 3 | 0.02438896 | 0.02438896 | 2 | 3 | 0.51676182 | 0.51676182 |
| chr6 | 118337197 | 118417529 | 80333  | 2  | 2 | 1 | 0.0828918  | 0.02438896 | 3 | 3 | 0.30102999 | 0.51676182 |
| chr6 | 118417529 | 118507150 | 89622  | 3  | 3 | 1 | 0.17593012 | 0.02438896 | 3 | 3 | 0.17593012 | 0.51676182 |
| chr6 | 118507150 | 118638707 | 131558 | 2  | 3 | 1 | 0.30102999 | 0.02438896 | 2 | 3 | 0.0828918  | 0.51676182 |
| chr6 | 118638707 | 118830249 | 191543 | 4  | 3 | 1 | 0.10122019 | 0.02438896 | 4 | 3 | 0.30102999 | 0.51676182 |
| chr6 | 118830249 | 118830308 | 60     | 1  | 3 | 1 | 0.05670724 | 0.02438896 | 5 | 3 | 0.45545077 | 0.51676182 |
| chr6 | 118830308 | 118931017 | 100710 | 3  | 3 | 1 | 0.10122019 | 0.02438896 | 4 | 3 | 0.30102999 | 0.51676182 |
| chr6 | 118931017 | 119373008 | 441992 | 10 | 3 | 1 | 0.10122019 | 0.05404976 | 4 | 2 | 0.30102999 | 0.3        |

|      |           |           |        |    |   |   |            |            |    |   |            |            |
|------|-----------|-----------|--------|----|---|---|------------|------------|----|---|------------|------------|
| chr6 | 123957984 | 124125473 | 167490 | 2  | 2 | 0 | 0.0429175  | 0          | 4  | 3 | 0.47744371 | 0.93173516 |
| chr6 | 124125473 | 124125532 | 60     | 1  | 2 | 1 | 0.0429175  | 0.02438896 | 4  | 3 | 0.47744371 | 0.51676182 |
| chr6 | 124125532 | 124166602 | 41071  | 1  | 1 | 0 | 0.01091641 | 0          | 4  | 3 | 0.76005302 | 0.93173516 |
| chr6 | 124166602 | 124351985 | 185384 | 4  | 1 | 1 | 0.01091641 | 0.02438896 | 4  | 3 | 0.76005302 | 0.51676182 |
| chr6 | 124351985 | 124526914 | 174930 | 5  | 1 | 2 | 0.01091641 | 0.08289118 | 4  | 3 | 0.76005302 | 0.30102999 |
| chr6 | 124526914 | 124653671 | 126758 | 3  | 2 | 2 | 0.02162467 | 0.08289118 | 5  | 3 | 0.68214471 | 0.30102999 |
| chr6 | 124653671 | 124717712 | 64042  | 2  | 1 | 2 | 0.00478973 | 0.08289118 | 5  | 3 | 1.02643191 | 0.30102999 |
| chr6 | 124717712 | 124883439 | 165728 | 3  | 0 | 2 | 0          | 0.08289118 | 4  | 3 | 1.16272838 | 0.30102999 |
| chr6 | 124883439 | 125083105 | 199667 | 6  | 0 | 0 | 0          | 0.08289118 | 5  | 3 | 1.60515106 | 0.30102999 |
| chr6 | 125083105 | 125304535 | 221341 | 3  | 0 | 1 | 0          | 0.02438896 | 4  | 3 | 1.26272838 | 0.51676182 |
| chr6 | 125304535 | 126298928 | 994394 | 23 | 0 | 1 | 0          | 0.02438896 | 5  | 3 | 1.60515106 | 0.51676182 |
| chr6 | 126298928 | 126298987 | 60     | 1  | 0 | 1 | 0          | 0.02438896 | 6  | 3 | 1.95986592 | 0.51676182 |
| chr6 | 126298987 | 126391126 | 92140  | 2  | 0 | 0 | 0          | 0          | 6  | 3 | 1.95986592 | 0.93173516 |
| chr6 | 126391126 | 126707405 | 316280 | 3  | 0 | 0 | 0          | 0          | 5  | 3 | 1.60515106 | 0.93173516 |
| chr6 | 126707405 | 126749767 | 42363  | 2  | 0 | 0 | 0          | 0          | 6  | 3 | 1.95986592 | 0.93173516 |
| chr6 | 126749767 | 126801112 | 51346  | 2  | 1 | 0 | 0.00204627 | 0          | 6  | 3 | 1.31360226 | 0.93173516 |
| chr6 | 126801112 | 126974958 | 173847 | 3  | 1 | 0 | 0.00478973 | 0          | 5  | 3 | 1.02643191 | 0.93173516 |
| chr6 | 126974958 | 127130705 | 155748 | 3  | 1 | 1 | 0.00204627 | 0.02438896 | 6  | 3 | 1.31360226 | 0.51676182 |
| chr6 | 127130705 | 127518222 | 387518 | 8  | 2 | 1 | 0.01053319 | 0.02438896 | 6  | 3 | 0.91219088 | 0.51676182 |
| chr6 | 127518222 | 127595065 | 76844  | 2  | 1 | 1 | 0.00493743 | 0.02438896 | 7  | 3 | 1.16581773 | 0.51676182 |
| chr6 | 127595065 | 127663255 | 58194  | 4  | 2 | 1 | 0.01598258 | 0.02438896 | 7  | 3 | 0.84395715 | 0.51676182 |
| chr6 | 127663255 | 128036590 | 37326  | 7  | 1 | 1 | 0.00493743 | 0.02438896 | 7  | 3 | 1.16581773 | 0.51676182 |
| chr6 | 128036590 | 128263597 | 227018 | 6  | 3 | 1 | 0.01598258 | 0.02438896 | 7  | 3 | 0.84395715 | 0.51676182 |
| chr6 | 128263597 | 128263656 | 60     | 1  | 1 | 1 | 0.0079614  | 0.02438896 | 8  | 3 | 1.07548421 | 0.51676182 |
| chr6 | 128263656 | 128345254 | 81599  | 2  | 3 | 1 | 0.01598258 | 0.02438896 | 7  | 3 | 0.84395715 | 0.51676182 |
| chr6 | 128345254 | 128450892 | 105639 | 3  | 1 | 3 | 0.0079614  | 0.02438896 | 8  | 3 | 1.07548421 | 0.51676182 |
| chr6 | 128450892 | 128505706 | 54815  | 1  | 1 | 1 | 8.47E-04   | 0.02438896 | 7  | 3 | 1.62048027 | 0.51676182 |
| chr6 | 128505706 | 128683120 | 177415 | 4  | 1 | 1 | 0.00204627 | 0.02438896 | 6  | 3 | 1.31360226 | 0.51676182 |
| chr6 | 128683120 | 128774748 | 91629  | 2  | 1 | 1 | 0.00478973 | 0.02438896 | 5  | 3 | 1.02643191 | 0.51676182 |
| chr6 | 128774748 | 128899143 | 124396 | 3  | 2 | 1 | 0.00493743 | 0.02438896 | 7  | 3 | 1.16581773 | 0.51676182 |
| chr6 | 128899143 | 128965749 | 66607  | 2  | 3 | 1 | 0.01598258 | 0.02438896 | 7  | 3 | 0.84395715 | 0.51676182 |
| chr6 | 128965749 | 129052149 | 86401  | 1  | 2 | 1 | 0.00493743 | 0.02438896 | 7  | 3 | 1.16581773 | 0.51676182 |
| chr6 | 129052149 | 129331414 | 279266 | 5  | 2 | 2 | 0.00221948 | 0.08289118 | 8  | 3 | 1.44210395 | 0.30102999 |
| chr6 | 129331414 | 129474072 | 142659 | 4  | 2 | 0 | 0.00378107 | 0.08289118 | 9  | 3 | 1.33111237 | 0.30102999 |
| chr6 | 129474072 | 129573328 | 99257  | 2  | 3 | 2 | 0.0079614  | 0.08289118 | 8  | 3 | 1.07548421 | 0.30102999 |
| chr6 | 129573328 | 129646590 | 73263  | 1  | 2 | 0 | 0.01598258 | 0.08289118 | 7  | 3 | 0.84395715 | 0.30102999 |
| chr6 | 129646590 | 129706728 | 60139  | 1  | 3 | 1 | 0.01598258 | 0.02438896 | 7  | 3 | 0.84395715 | 0.51676182 |
| chr6 | 129706728 | 129771998 | 65271  | 2  | 3 | 1 | 0.00170589 | 0.02438896 | 10 | 3 | 1.61091002 | 0.51676182 |
| chr6 | 129771998 | 129823921 | 51924  | 1  | 3 | 1 | 0.00170589 | 0.05404976 | 10 | 2 | 1.61091002 | 0.30102999 |
| chr6 | 129823921 | 129899080 | 75160  | 2  | 3 | 1 | 0.00378107 | 0.05404976 | 9  | 2 | 1.33111237 | 0.30102999 |
| chr6 | 129899080 | 130031098 | 132019 | 3  | 3 | 1 | 0.0079614  | 0.05404976 | 8  | 2 | 1.07548421 | 0.30102999 |
| chr6 | 130031098 | 130031325 | 228    | 2  | 3 | 1 | 0.0079614  | 0.02438896 | 8  | 3 | 1.07548421 | 0.51676182 |
| chr6 | 130031325 | 130133930 | 102606 | 2  | 3 | 1 | 0.01598258 | 0.02438896 | 7  | 3 | 0.84395715 | 0.51676182 |
| chr6 | 130133930 | 130133989 | 60     | 1  | 3 | 1 | 0.0079614  | 0.02438896 | 8  | 3 | 1.07548421 | 0.51676182 |
| chr6 | 130133989 | 130250885 | 116897 | 2  | 3 | 1 | 0.01598258 | 0.05404976 | 7  | 2 | 0.84395715 | 0.30102999 |
| chr6 | 130250885 | 130250944 | 60     | 1  | 2 | 0 | 0.0079614  | 0.08289118 | 8  | 3 | 1.07548421 | 0.30102999 |
| chr6 | 130250944 | 130432126 | 181183 | 2  | 2 | 0 | 0.01598258 | 0.08289118 | 3  | 3 | 0.84395715 | 0.30102999 |
| chr6 | 130432126 | 130505715 | 73590  | 1  | 3 | 0 | 0.03070643 | 0.05404976 | 6  | 2 | 0.63695542 | 0.30102999 |
| chr6 | 130505715 | 130505772 | 58     | 1  | 3 | 2 | 0.03070643 | 0.08289118 | 3  | 3 | 0.63695542 | 0.30102999 |
| chr6 | 130505772 | 130609194 | 103423 | 3  | 3 | 0 | 0.03070643 | 0.02438896 | 6  | 3 | 0.63695542 | 0.51676182 |
| chr6 | 130609194 | 130658059 | 48866  | 3  | 3 | 1 | 0.01598258 | 0.02438896 | 7  | 3 | 0.84395715 | 0.51676182 |
| chr6 | 130658059 | 130658118 | 60     | 1  | 3 | 1 | 0.0079614  | 0.01091641 | 8  | 4 | 1.07548421 | 0.76005302 |
| chr6 | 130658118 | 130687834 | 29717  | 1  | 3 | 1 | 0.01598258 | 0.01091641 | 4  | 4 | 0.84395715 | 0.76005302 |
| chr6 | 130687834 | 130706288 | 18455  | 1  | 3 | 1 | 0.01598258 | 0.05404976 | 7  | 2 | 0.84395715 | 0.30102999 |
| chr6 | 130706288 | 130763034 | 56747  | 3  | 3 | 1 | 0.0079614  | 0.05404976 | 8  | 2 | 1.07548421 | 0.30102999 |
| chr6 | 130763034 | 130916564 | 153531 | 2  | 3 | 1 | 0.01598258 | 0.05404976 | 7  | 2 | 0.84395715 | 0.30102999 |
| chr6 | 130916564 | 130916623 | 60     | 1  | 2 | 2 | 0.01598258 | 0.1575501  | 7  | 2 | 0.84395715 | 0.1575501  |
| chr6 | 130916623 | 131046165 | 129543 | 1  | 2 | 1 | 0.00493743 | 0.05404976 | 7  | 2 | 1.16581773 | 0.30102999 |
| chr6 | 131046165 | 131156645 | 110481 | 2  | 2 | 1 | 9.54E-04   | 0.02438896 | 9  | 3 | 1.74076927 | 0.51676182 |
| chr6 | 131156645 | 131160901 | 4257   | 2  | 3 | 2 | 0.00378107 | 0.08289118 | 3  | 3 | 1.33111237 | 0.30102999 |
| chr6 | 131160901 | 131247722 | 86822  | 3  | 2 | 2 | 9.54E-04   | 0.08289118 | 9  | 3 | 1.74076927 | 0.30102999 |
| chr6 | 131247722 | 131247781 | 60     | 1  | 3 | 2 | 0.00378107 | 0.08289118 | 9  | 3 | 1.33111237 | 0.30102999 |
| chr6 | 131247781 | 131252694 | 277914 | 5  | 2 | 1 | 9.54E-04   | 0.08289118 | 9  | 3 | 1.74076927 | 0.30102999 |
| chr6 | 131252694 | 131525753 | 60     | 1  | 3 | 2 | 0.00378107 | 0.08289118 | 9  | 3 | 1.33111237 | 0.30102999 |
| chr6 | 131525753 | 131604489 | 78737  | 2  | 2 | 0 | 0.00221948 | 0.08289118 | 8  | 3 | 1.44210395 | 0.30102999 |
| chr6 | 131604489 | 131785777 | 181289 | 2  | 2 | 2 | 0.02162467 | 0.08289118 | 5  | 3 | 0.68214471 | 0.30102999 |
| chr6 | 131785777 | 131785836 | 60     | 1  | 2 | 2 | 0.01053319 | 0.08289118 | 6  | 3 | 0.91219088 | 0.30102999 |
| chr6 | 131785836 | 131895827 | 109992 | 1  | 2 | 2 | 0.02162467 | 0.08289118 | 5  | 3 | 0.68214471 | 0.30102999 |
| chr6 | 131895827 | 131940995 | 45169  | 4  | 2 | 2 | 0.02162467 | 0.0429175  | 5  | 4 | 0.68214471 | 0.47744371 |
| chr6 | 131940995 | 131995331 | 54337  | 2  | 2 | 2 | 0.00493743 | 0.0429175  | 7  | 4 | 1.16581773 | 0.47744371 |
| chr6 | 131995331 | 132270859 | 275529 | 9  | 2 | 2 | 0.01053319 | 0.0429175  | 6  | 4 | 0.91219088 | 0.47744371 |
| chr6 | 132270859 | 132388801 | 117943 | 1  | 2 | 2 | 0.01053319 | 0.08289118 | 6  | 3 | 0.91219088 | 0.30102999 |
| chr6 | 132388801 | 132388860 | 60     | 1  | 2 | 2 | 0.00493743 | 0.08289118 | 7  | 3 | 1.16581773 | 0.30102999 |
| chr6 | 132388860 | 132470533 | 81674  | 1  | 2 | 2 | 0.01053319 | 0.08289118 | 6  | 3 | 0.91219088 | 0.30102999 |
| chr6 | 132470533 | 132633795 | 163263 | 2  | 2 | 2 | 0.01053319 | 0.1575501  | 2  | 2 | 0.91219088 | 0.1575501  |
| chr6 | 132633795 | 132637184 | 3390   | 2  | 3 | 2 | 0.03070643 | 0.08289118 | 6  | 3 | 0.63695542 | 0.30102999 |
| chr6 | 132637184 | 132714172 | 76989  | 1  | 3 | 2 | 0.03070643 | 0.1575501  | 6  | 2 | 0.63695542 | 0.1575501  |
| chr6 | 132714172 | 132814183 | 100012 | 3  | 2 | 2 | 0.03070643 | 0.08289118 | 6  | 3 | 0.63695542 | 0.30102999 |
| chr6 | 132814183 | 132939023 | 124841 | 6  | 3 | 2 | 0.03070643 | 0.0429175  | 6  | 4 | 0.63695542 | 0.47744371 |
| chr6 | 132939023 | 133013571 | 74549  | 2  | 3 | 2 | 0.03070643 | 0.1575501  | 6  | 2 | 0.63695542 | 0.1575501  |
| chr6 | 133013571 | 133081900 | 68330  | 1  | 2 | 2 | 0.01053319 | 0.1575501  | 6  | 2 | 0.91219088 | 0.1575501  |
| chr6 | 133081900 | 133108227 | 26328  | 2  | 2 | 2 | 0.01053319 | 0.08289118 | 6  | 3 | 0.91219088 | 0.30102999 |
| chr6 | 133108227 | 133138620 | 30394  | 1  | 2 | 2 | 0.0162467  | 0.08289118 | 5  | 3 | 0.68214471 | 0.30102999 |
| chr6 | 133138620 | 133179434 | 40815  | 1  | 2 | 2 | 0.02162467 | 0.1575501  | 5  | 2 | 0.68214471 | 0.1575501  |
| chr6 | 133179434 | 133301132 | 121699 | 2  | 2 | 0 | 0.01053319 | 0.1575501  | 6  | 2 | 0.91219088 | 0.1575501  |
| chr6 | 133301132 | 133301191 | 60     | 1  | 2 | 2 | 0.01053319 | 0.08289118 | 6  | 3 | 0.91219088 | 0.30102999 |
| chr6 | 133301191 | 133769222 | 468032 | 6  | 2 | 2 | 0.01053319 | 0.1575501  | 2  | 2 | 0.91219088 | 0.1575501  |
| chr6 | 133769222 | 133769280 | 59     | 1  | 2 | 2 | 0.01053319 | 0.08289118 | 6  | 3 | 0.91219088 | 0.30102999 |
| chr6 | 133769280 | 133850590 | 81311  | 1  | 2 | 2 | 0.01053319 | 0.1575501  | 2  | 2 | 0.91219088 | 0.1575501  |
| chr6 | 133850590 | 133850649 | 60     | 1  | 2 | 2 | 0.0307     |            |    |   |            |            |

|      |           |           |        |    |   |   |            |            |   |   |            |            |
|------|-----------|-----------|--------|----|---|---|------------|------------|---|---|------------|------------|
| chr6 | 136704809 | 136704864 | 56     | 1  | 2 | 3 | 0.02162467 | 0.17593012 | 5 | 3 | 0.68214471 | 0.17593012 |
| chr6 | 136704864 | 137019615 | 314752 | 8  | 2 | 3 | 0.0429175  | 0.17593012 | 4 | 3 | 0.47744371 | 0.17593012 |
| chr6 | 137019615 | 137070086 | 50472  | 2  | 2 | 3 | 0.02162467 | 0.17593012 | 5 | 3 | 0.68214471 | 0.17593012 |
| chr6 | 137070086 | 137147457 | 77372  | 1  | 2 | 3 | 0.02162467 | 0.30102999 | 5 | 2 | 0.68214471 | 0.08289318 |
| chr6 | 137147457 | 137147511 | 55     | 1  | 2 | 3 | 0.1053319  | 0.30102999 | 6 | 2 | 0.91219088 | 0.08289318 |
| chr6 | 137147511 | 137175714 | 28204  | 1  | 2 | 3 | 0.02162467 | 0.30102999 | 5 | 2 | 0.68214471 | 0.08289318 |
| chr6 | 137175714 | 137219255 | 43542  | 1  | 2 | 3 | 0.0429175  | 0.30102999 | 4 | 2 | 0.47744371 | 0.08289318 |
| chr6 | 137219255 | 137219314 | 60     | 1  | 2 | 3 | 0.0429175  | 0.17593012 | 4 | 3 | 0.47744371 | 0.17593012 |
| chr6 | 137219314 | 137322108 | 102795 | 2  | 2 | 3 | 0.0429175  | 0.30102999 | 4 | 2 | 0.47744371 | 0.08289318 |
| chr6 | 137322108 | 137469001 | 146894 | 3  | 2 | 3 | 0.0429175  | 0.17593012 | 4 | 3 | 0.47744371 | 0.17593012 |
| chr6 | 137469001 | 137620298 | 151298 | 4  | 2 | 2 | 0.0429175  | 0.08289318 | 4 | 3 | 0.47744371 | 0.30102999 |
| chr6 | 137620298 | 137620357 | 60     | 1  | 2 | 2 | 0.02162467 | 0.08289318 | 5 | 3 | 0.68214471 | 0.30102999 |
| chr6 | 137620357 | 137813478 | 193122 | 2  | 2 | 2 | 0.0429175  | 0.08289318 | 4 | 3 | 0.47744371 | 0.30102999 |
| chr6 | 137813478 | 138095257 | 281780 | 3  | 2 | 2 | 0.0429175  | 0.175501   | 4 | 2 | 0.47744371 | 0.175501   |
| chr6 | 138095257 | 138195072 | 99816  | 1  | 1 | 2 | 0.00478973 | 0.175501   | 4 | 2 | 0.76005302 | 0.175501   |
| chr6 | 138195072 | 138203754 | 8683   | 2  | 1 | 2 | 0.00478973 | 0.175501   | 5 | 2 | 1.02643191 | 0.175501   |
| chr6 | 138203754 | 138295199 | 91446  | 1  | 1 | 1 | 0.01091641 | 0.05404976 | 4 | 2 | 0.76005302 | 0.30102999 |
| chr6 | 138295199 | 138419878 | 124680 | 3  | 1 | 2 | 0.01091641 | 0.175501   | 4 | 2 | 0.76005302 | 0.175501   |
| chr6 | 138419878 | 138434120 | 14243  | 2  | 1 | 2 | 0.00478973 | 0.175501   | 5 | 2 | 1.02643191 | 0.175501   |
| chr6 | 138434120 | 138502451 | 68332  | 1  | 1 | 2 | 0.01091641 | 0.175501   | 4 | 2 | 0.76005302 | 0.175501   |
| chr6 | 138502451 | 138537590 | 38050  | 2  | 1 | 3 | 0.01091641 | 0.30102999 | 4 | 2 | 0.76005302 | 0.08289318 |
| chr6 | 138537590 | 138816531 | 279032 | 6  | 1 | 2 | 0.01091641 | 0.175501   | 4 | 2 | 0.76005302 | 0.175501   |
| chr6 | 138816531 | 139066203 | 249673 | 5  | 1 | 2 | 0.00478973 | 0.175501   | 5 | 2 | 1.02643191 | 0.175501   |
| chr6 | 139066203 | 139066262 | 60     | 1  | 1 | 3 | 0.00478973 | 0.30102999 | 5 | 2 | 1.02643191 | 0.08289318 |
| chr6 | 139066262 | 139121816 | 55555  | 2  | 1 | 3 | 0.01091641 | 0.30102999 | 4 | 2 | 0.76005302 | 0.08289318 |
| chr6 | 139121816 | 139183708 | 61893  | 1  | 1 | 3 | 0.02438896 | 0.30102999 | 3 | 2 | 0.51676182 | 0.08289318 |
| chr6 | 139183708 | 139183767 | 60     | 1  | 1 | 4 | 0.02438896 | 0.47744371 | 3 | 2 | 0.51676182 | 0.0429175  |
| chr6 | 139183767 | 139262380 | 78614  | 2  | 1 | 3 | 0.05404976 | 0.30102999 | 2 | 2 | 0.30102999 | 0.08289318 |
| chr6 | 139262380 | 139285267 | 22888  | 2  | 1 | 3 | 0.02438896 | 0.30102999 | 3 | 2 | 0.51676182 | 0.08289318 |
| chr6 | 139285267 | 139437634 | 152368 | 3  | 1 | 3 | 0.05404976 | 0.30102999 | 2 | 2 | 0.30102999 | 0.08289318 |
| chr6 | 139437634 | 139693619 | 255986 | 7  | 1 | 4 | 0.05404976 | 0.47744371 | 2 | 2 | 0.30102999 | 0.0429175  |
| chr6 | 139693619 | 139800754 | 107136 | 1  | 1 | 4 | 0.05404976 | 0.76005302 | 2 | 1 | 0.30102999 | 0.01091641 |
| chr6 | 139800754 | 140335592 | 534839 | 5  | 0 | 4 | 0          | 0.76005302 | 1 | 0 | 0.61140001 | 0.01091641 |
| chr6 | 140335592 | 140335651 | 60     | 1  | 1 | 4 | 0.05404976 | 0.76005302 | 2 | 1 | 0.30102999 | 0.01091641 |
| chr6 | 140335651 | 140669555 | 333905 | 2  | 0 | 0 | 0          | 0          | 2 | 0 | 0.61140001 | 0          |
| chr6 | 140669555 | 141166056 | 496502 | 5  | 0 | 0 | 0          | 0          | 3 | 0 | 0.93173516 | 0          |
| chr6 | 141166056 | 141528317 | 362262 | 3  | 0 | 0 | 0          | 0          | 2 | 0 | 0.61140001 | 0          |
| chr6 | 141528317 | 141757845 | 229529 | 2  | 0 | 1 | 0          | 0.05404976 | 3 | 2 | 0.93173516 | 0.30102999 |
| chr6 | 141757845 | 141894754 | 136910 | 2  | 0 | 2 | 0          | 0.08289318 | 3 | 3 | 0.93173516 | 0.30102999 |
| chr6 | 141894754 | 141970442 | 75689  | 2  | 0 | 2 | 0          | 0.08289318 | 4 | 3 | 1.26272838 | 0.30102999 |
| chr6 | 141970442 | 142143478 | 173037 | 3  | 1 | 2 | 0.01091641 | 0.08289318 | 4 | 3 | 0.76005302 | 0.30102999 |
| chr6 | 142143478 | 142143537 | 60     | 1  | 2 | 2 | 0.0429175  | 0.08289318 | 4 | 3 | 0.47744371 | 0.30102999 |
| chr6 | 142143537 | 142200482 | 56946  | 1  | 1 | 2 | 0.01091641 | 0.08289318 | 4 | 3 | 0.76005302 | 0.30102999 |
| chr6 | 142200482 | 142302646 | 102165 | 1  | 1 | 1 | 0.01091641 | 0.02438896 | 4 | 3 | 0.76005302 | 0.51676182 |
| chr6 | 142302646 | 142401965 | 99320  | 1  | 0 | 1 | 0          | 0.02438896 | 4 | 3 | 1.26272838 | 0.51676182 |
| chr6 | 142401965 | 142490715 | 88751  | 4  | 0 | 2 | 0          | 0.08289318 | 4 | 3 | 1.26272838 | 0.30102999 |
| chr6 | 142490715 | 142804538 | 313824 | 8  | 1 | 2 | 0.01091641 | 0.08289318 | 4 | 3 | 0.76005302 | 0.30102999 |
| chr6 | 142804538 | 142880252 | 75715  | 2  | 1 | 2 | 0.00478973 | 0.08289318 | 5 | 3 | 1.02643191 | 0.30102999 |
| chr6 | 142880252 | 143658780 | 778529 | 14 | 1 | 2 | 0.00204627 | 0.08289318 | 6 | 3 | 1.31360226 | 0.30102999 |
| chr6 | 143658780 | 143695792 | 37013  | 1  | 1 | 2 | 0.00204627 | 0.175501   | 6 | 2 | 1.31360226 | 0.175501   |
| chr6 | 143695792 | 143921803 | 226012 | 5  | 1 | 2 | 0.00478973 | 0.175501   | 5 | 2 | 1.02643191 | 0.175501   |
| chr6 | 143921803 | 143921862 | 60     | 1  | 2 | 2 | 0.02162467 | 0.175501   | 5 | 2 | 0.68214471 | 0.175501   |
| chr6 | 143921862 | 144145419 | 223558 | 5  | 1 | 2 | 0.00478973 | 0.175501   | 5 | 2 | 1.02643191 | 0.175501   |
| chr6 | 144145419 | 144183388 | 37970  | 2  | 1 | 2 | 0.02162467 | 0.175501   | 5 | 2 | 0.68214471 | 0.175501   |
| chr6 | 144183388 | 144223245 | 39858  | 1  | 2 | 2 | 0.0429175  | 0.175501   | 4 | 2 | 0.47744371 | 0.175501   |
| chr6 | 144223245 | 144315564 | 92320  | 3  | 2 | 2 | 0.02162467 | 0.08289318 | 5 | 3 | 0.68214471 | 0.30102999 |
| chr6 | 144315564 | 144328897 | 13334  | 2  | 2 | 2 | 0.01053319 | 0.08289318 | 6 | 3 | 0.91219088 | 0.30102999 |
| chr6 | 144328897 | 144499914 | 171018 | 5  | 1 | 2 | 0.01091641 | 0.08289318 | 4 | 3 | 0.76005302 | 0.30102999 |
| chr6 | 144499914 | 144499973 | 60     | 1  | 1 | 3 | 0.01091641 | 0.17593012 | 4 | 3 | 0.76005302 | 0.17593012 |
| chr6 | 144499973 | 144692464 | 192492 | 3  | 1 | 2 | 0.01091641 | 0.08289318 | 4 | 3 | 0.76005302 | 0.30102999 |
| chr6 | 144692464 | 144692523 | 60     | 1  | 2 | 3 | 0.0429175  | 0.17593012 | 4 | 3 | 0.47744371 | 0.17593012 |
| chr6 | 144692523 | 144945977 | 253455 | 5  | 0 | 3 | 0          | 0.17593012 | 4 | 3 | 1.26272838 | 0.17593012 |
| chr6 | 144945977 | 144946036 | 60     | 1  | 0 | 4 | 0          | 0.30102999 | 4 | 3 | 1.26272838 | 0.10122019 |
| chr6 | 144946036 | 145057662 | 111627 | 2  | 0 | 3 | 0          | 0.17593012 | 4 | 3 | 1.26272838 | 0.17593012 |
| chr6 | 145057662 | 145057721 | 60     | 1  | 1 | 4 | 0          | 0.01091641 | 4 | 3 | 0.76005302 | 0.10122019 |
| chr6 | 145057721 | 145105155 | 47435  | 1  | 1 | 3 | 0.01091641 | 0.17593012 | 4 | 3 | 0.76005302 | 0.17593012 |
| chr6 | 145105155 | 145283553 | 178399 | 2  | 1 | 2 | 0.01091641 | 0.08289318 | 4 | 3 | 0.76005302 | 0.30102999 |
| chr6 | 145283553 | 145283612 | 60     | 1  | 2 | 2 | 0.0429175  | 0.08289318 | 4 | 3 | 0.47744371 | 0.30102999 |
| chr6 | 145283612 | 145473927 | 190316 | 1  | 1 | 2 | 0.0429175  | 0.05404976 | 4 | 2 | 0.47744371 | 0.30102999 |
| chr6 | 145473927 | 145664481 | 190555 | 1  | 2 | 0 | 0          | 0.175501   | 2 | 2 | 0.175501   | 0.61140001 |
| chr6 | 145664481 | 145734378 | 69898  | 1  | 1 | 0 | 0.05404976 | 0          | 2 | 2 | 0.30102999 | 0.61140001 |
| chr6 | 145734378 | 145734437 | 60     | 1  | 1 | 2 | 0.02438896 | 0.0429175  | 3 | 4 | 0.51676182 | 0.47744371 |
| chr6 | 145734437 | 145882152 | 247716 | 3  | 1 | 2 | 0.05404976 | 0.08289318 | 2 | 3 | 0.30102999 | 0.30102999 |
| chr6 | 145882152 | 146042379 | 60228  | 1  | 0 | 2 | 0          | 0.175501   | 2 | 2 | 0.61140001 | 0.175501   |
| chr6 | 146042379 | 146055872 | 13494  | 2  | 0 | 3 | 0          | 0.17593012 | 2 | 3 | 0.61140001 | 0.17593012 |
| chr6 | 146055872 | 146132701 | 76830  | 1  | 0 | 2 | 0          | 0.175501   | 2 | 2 | 0.61140001 | 0.175501   |
| chr6 | 146132701 | 146132760 | 60     | 1  | 2 | 2 | 0.05404976 | 0.175501   | 2 | 2 | 0.30102999 | 0.175501   |
| chr6 | 146132760 | 146179896 | 47137  | 1  | 1 | 1 | 0.05404976 | 0.05404976 | 2 | 2 | 0.30102999 | 0.30102999 |
| chr6 | 146179896 | 146231330 | 51435  | 3  | 1 | 2 | 0.05404976 | 0.175501   | 2 | 2 | 0.30102999 | 0.175501   |
| chr6 | 146231330 | 146313209 | 81880  | 3  | 0 | 2 | 0          | 0.175501   | 2 | 2 | 0.61140001 | 0.175501   |
| chr6 | 146313209 | 146351002 | 37794  | 2  | 0 | 2 | 0          | 0.30102999 | 2 | 2 | 0.61140001 | 0.08289318 |
| chr6 | 146351002 | 146434860 | 83859  | 3  | 0 | 3 | 0          | 0.17593012 | 3 | 3 | 0.93173516 | 0.17593012 |
| chr6 | 146434860 | 146494044 | 59185  | 1  | 0 | 3 | 0          | 0.17593012 | 3 | 3 | 0.61140001 | 0.17593012 |
| chr6 | 146494044 | 146589430 | 95387  | 3  | 1 | 4 | 0.05404976 | 0.30102999 | 3 | 3 | 0.30102999 | 0.10122019 |
| chr6 | 146589430 | 146673396 | 83967  | 3  | 1 | 4 | 0.175501   | 0.30102999 | 2 | 3 | 0.175501   | 0.10122019 |
| chr6 | 146673396 | 146703664 | 30629  | 2  | 2 | 5 | 0.175501   | 0.45545077 | 2 | 3 | 0.175501   | 0.05670724 |
| chr6 | 146703664 | 146758280 | 54617  | 2  | 2 | 4 | 0.175501   | 0.30102999 | 2 | 3 | 0.175501   | 0.10122019 |
| chr6 | 146758280 | 146875909 | 117630 | 1  | 1 | 4 | 0.05404976 | 0.30102999 | 2 | 3 | 0.30102999 | 0.10122019 |
| chr6 | 146875909 | 146934166 | 58258  | 2  | 1 | 5 | 0.05404976 | 0.45545077 | 2 | 2 | 0.30102999 | 0.05670724 |
| chr6 | 146934166 | 146988824 | 54659  | 1  | 1 | 3 | 0.05404976 | 0.17593012 | 3 | 3 | 0.30102999 | 0.17593012 |
| chr6 | 146988824 | 146988883 | 60     | 1  | 2 | 3 | 0.175501   | 0.17593012 | 3 | 3 | 0.175501   | 0.175      |

|      |           |           |        |    |   |   |            |            |   |   |            |            |
|------|-----------|-----------|--------|----|---|---|------------|------------|---|---|------------|------------|
| chr6 | 149946190 | 150132442 | 186253 | 6  | 1 | 1 | 0.01091641 | 0.02438896 | 4 | 3 | 0.76005302 | 0.51676182 |
| chr6 | 150132442 | 150209800 | 77359  | 3  | 1 | 1 | 0.01091641 | 0.05404976 | 4 | 2 | 0.76005302 | 0.30102999 |
| chr6 | 150209800 | 150353992 | 144193 | 3  | 1 | 1 | 0.02438896 | 0.05404976 | 3 | 2 | 0.51676182 | 0.30102999 |
| chr6 | 150353992 | 150476449 | 122458 | 4  | 1 | 1 | 0.01091641 | 0.05404976 | 4 | 2 | 0.76005302 | 0.30102999 |
| chr6 | 150476449 | 150642806 | 166358 | 4  | 1 | 1 | 0.01091641 | 0.1218695  | 4 | 1 | 0.76005302 | 0.1218695  |
| chr6 | 150642806 | 150642865 | 60     | 1  | 1 | 1 | 0.00478973 | 0.1218695  | 5 | 1 | 1.02643191 | 0.1218695  |
| chr6 | 150642865 | 150702522 | 59658  | 1  | 1 | 1 | 0.01091641 | 0.1218695  | 4 | 1 | 0.76005302 | 0.1218695  |
| chr6 | 150702522 | 150981103 | 278582 | 5  | 2 | 1 | 0.0429175  | 0.1218695  | 4 | 1 | 0.47744371 | 0.1218695  |
| chr6 | 150981103 | 151116095 | 134993 | 2  | 1 | 1 | 0.01091641 | 0.1218695  | 4 | 1 | 0.76005302 | 0.1218695  |
| chr6 | 151116095 | 151630579 | 514485 | 11 | 1 | 1 | 0.01091641 | 0.05404976 | 4 | 2 | 0.76005302 | 0.30102999 |
| chr6 | 151630579 | 151734887 | 104309 | 3  | 0 | 0 | 0.05404976 | 0.05404976 | 4 | 2 | 1.26272838 | 0.30102999 |
| chr6 | 151734887 | 151734946 | 60     | 1  | 1 | 1 | 0.01091641 | 0.05404976 | 4 | 2 | 0.76005302 | 0.30102999 |
| chr6 | 151734946 | 151907174 | 172229 | 4  | 0 | 0 | 0.05404976 | 0.05404976 | 4 | 2 | 1.26272838 | 0.30102999 |
| chr6 | 151907174 | 151907232 | 59     | 1  | 1 | 1 | 0.01091641 | 0.05404976 | 4 | 2 | 0.76005302 | 0.30102999 |
| chr6 | 151907232 | 152159730 | 252499 | 5  | 0 | 0 | 0.05404976 | 0.05404976 | 4 | 2 | 1.26272838 | 0.30102999 |
| chr6 | 152159730 | 152298586 | 138857 | 3  | 0 | 0 | 0.05404976 | 0.05404976 | 3 | 2 | 0.93173516 | 0.30102999 |
| chr6 | 152298586 | 152325493 | 26908  | 2  | 0 | 1 | 0.02438896 | 0.02438896 | 3 | 3 | 0.93173516 | 0.51676182 |
| chr6 | 152325493 | 152367078 | 41586  | 2  | 0 | 1 | 0.01091641 | 0.01091641 | 5 | 4 | 1.60515106 | 0.76005302 |
| chr6 | 152367078 | 152456275 | 89198  | 3  | 0 | 0 | 0.00478973 | 0.00478973 | 5 | 5 | 1.60515106 | 1.02643191 |
| chr6 | 152456275 | 152456334 | 60     | 1  | 0 | 2 | 0.02162467 | 0.02162467 | 5 | 5 | 1.60515106 | 0.68214471 |
| chr6 | 152456334 | 152590823 | 134490 | 2  | 0 | 0 | 0.02162467 | 0.02162467 | 3 | 5 | 0.93173516 | 0.68214471 |
| chr6 | 152590823 | 152826726 | 235904 | 5  | 0 | 0 | 0.02162467 | 0.02162467 | 2 | 5 | 0.61140001 | 0.68214471 |
| chr6 | 152826726 | 153298731 | 472006 | 9  | 0 | 0 | 0.02162467 | 0.02162467 | 2 | 1 | 0.30102999 | 0.68214471 |
| chr6 | 153298731 | 153311349 | 12619  | 3  | 1 | 3 | 0.1218695  | 0.05670724 | 3 | 1 | 0.1218695  | 0.45545077 |
| chr6 | 153311349 | 153417094 | 105746 | 5  | 0 | 3 | 0.05670724 | 0.05670724 | 1 | 1 | 0.30102999 | 0.45545077 |
| chr6 | 153417094 | 153543129 | 126036 | 3  | 0 | 3 | 0.03070643 | 0.03070643 | 1 | 6 | 0.30102999 | 0.63695542 |
| chr6 | 153543129 | 153543188 | 60     | 1  | 0 | 4 | 0.06713722 | 0.06713722 | 1 | 6 | 0.30102999 | 0.44141547 |
| chr6 | 153543188 | 153650250 | 107063 | 1  | 2 | 0 | 0.10533919 | 0.10533919 | 1 | 6 | 0.30102999 | 0.91219088 |
| chr6 | 153650250 | 153650309 | 60     | 1  | 0 | 2 | 0.03070643 | 0.03070643 | 1 | 6 | 0.30102999 | 0.63695542 |
| chr6 | 153650309 | 153938070 | 287762 | 2  | 0 | 2 | 0.01053391 | 0.01053391 | 1 | 6 | 0.30102999 | 0.91219088 |
| chr6 | 153938070 | 153981410 | 43341  | 2  | 0 | 4 | 0.06713722 | 0.06713722 | 1 | 6 | 0.30102999 | 0.44141547 |
| chr6 | 153981410 | 154122864 | 141455 | 1  | 0 | 2 | 0.01053391 | 0.01053391 | 1 | 6 | 0.30102999 | 0.91219088 |
| chr6 | 154122864 | 154295758 | 172895 | 3  | 0 | 2 | 0.01053391 | 0.01053391 | 2 | 6 | 0.61140001 | 0.91219088 |
| chr6 | 154295758 | 154412610 | 116853 | 2  | 0 | 1 | 0.01091641 | 0.01091641 | 1 | 4 | 0.30102999 | 0.76005302 |
| chr6 | 154412610 | 154414433 | 1824   | 2  | 0 | 2 | 0.0429175  | 0.0429175  | 1 | 4 | 0.30102999 | 0.47744371 |
| chr6 | 154414433 | 154491524 | 77092  | 2  | 1 | 0 | 0.01091641 | 0.01091641 | 1 | 4 | 0.30102999 | 0.76005302 |
| chr6 | 154491524 | 154535443 | 43920  | 2  | 1 | 2 | 0.1218695  | 0.0429175  | 1 | 4 | 0.1218695  | 0.47744371 |
| chr6 | 154535443 | 154567925 | 32483  | 1  | 0 | 1 | 0.01091641 | 0.01091641 | 1 | 4 | 0.30102999 | 0.76005302 |
| chr6 | 154567925 | 154705203 | 137279 | 3  | 0 | 1 | 0.00478973 | 0.00478973 | 2 | 5 | 0.61140001 | 1.02643191 |
| chr6 | 154705203 | 154751749 | 46547  | 3  | 0 | 2 | 0.00493743 | 0.00493743 | 2 | 6 | 0.61140001 | 1.16581773 |
| chr6 | 154751749 | 154827208 | 75460  | 2  | 0 | 1 | 8.47E-04   | 0.02162467 | 7 | 6 | 0.61140001 | 1.62048027 |
| chr6 | 154827208 | 155059401 | 232194 | 3  | 0 | 2 | 0.0204627  | 0.0204627  | 2 | 6 | 0.61140001 | 1.31360226 |
| chr6 | 155059401 | 155126517 | 67117  | 3  | 0 | 1 | 8.47E-04   | 8.47E-04   | 2 | 7 | 0.61140001 | 1.62048027 |
| chr6 | 155126517 | 155392484 | 265968 | 4  | 0 | 1 | 8.47E-04   | 8.47E-04   | 3 | 7 | 0.93173516 | 1.62048027 |
| chr6 | 155392484 | 155392543 | 60     | 1  | 0 | 2 | 0.00493743 | 0.00493743 | 3 | 7 | 0.93173516 | 1.16581773 |
| chr6 | 155392543 | 155470535 | 77993  | 2  | 0 | 1 | 0.00478973 | 0.00478973 | 3 | 5 | 0.93173516 | 1.02643191 |
| chr6 | 155470535 | 155565936 | 95402  | 2  | 0 | 1 | 0.01091641 | 0.01091641 | 3 | 4 | 0.93173516 | 0.76005302 |
| chr6 | 155565936 | 156423608 | 857673 | 11 | 0 | 0 | 0.01091641 | 0.01091641 | 2 | 4 | 0.61140001 | 0.76005302 |
| chr6 | 156423608 | 156423667 | 60     | 1  | 0 | 2 | 0.02162467 | 0.02162467 | 2 | 5 | 0.61140001 | 0.68214471 |
| chr6 | 156423667 | 156585724 | 162058 | 1  | 0 | 2 | 0.0429175  | 0.0429175  | 2 | 4 | 0.61140001 | 0.47744371 |
| chr6 | 156585724 | 156699568 | 113845 | 1  | 0 | 1 | 0.05404976 | 0.05404976 | 2 | 2 | 0.61140001 | 0.30102999 |
| chr6 | 156699568 | 156895627 | 196060 | 2  | 0 | 1 | 0.1218695  | 0.1218695  | 2 | 1 | 0.61140001 | 0.1218695  |
| chr6 | 156895627 | 156895686 | 60     | 1  | 0 | 1 | 0.05404976 | 0.05404976 | 2 | 2 | 0.61140001 | 0.30102999 |
| chr6 | 156895686 | 157120030 | 224345 | 2  | 0 | 1 | 0.1218695  | 0.1218695  | 1 | 1 | 0.30102999 | 0.1218695  |
| chr6 | 157120030 | 157120089 | 60     | 1  | 0 | 1 | 0.05404976 | 0.05404976 | 2 | 2 | 0.61140001 | 0.30102999 |
| chr6 | 157120089 | 157336025 | 215937 | 4  | 0 | 1 | 0.05404976 | 0.05404976 | 1 | 2 | 0.30102999 | 0.30102999 |
| chr6 | 157336025 | 157386210 | 50186  | 2  | 0 | 1 | 0.02438896 | 0.02438896 | 1 | 3 | 0.30102999 | 0.51676182 |
| chr6 | 157386210 | 157386269 | 60     | 1  | 0 | 1 | 0.01091641 | 0.01091641 | 1 | 4 | 0.30102999 | 0.76005302 |
| chr6 | 157386269 | 157533034 | 166766 | 2  | 0 | 1 | 0.02438896 | 0.02438896 | 1 | 3 | 0.30102999 | 0.51676182 |
| chr6 | 157533034 | 158144137 | 591104 | 7  | 0 | 0 | 0.01091641 | 0.01091641 | 4 | 3 | 0.30102999 | 0.76005302 |
| chr6 | 158144137 | 158211502 | 67366  | 2  | 1 | 1 | 0.1218695  | 0.01091641 | 2 | 4 | 0.1218695  | 0.76005302 |
| chr6 | 158211502 | 158211561 | 60     | 1  | 0 | 1 | 0.1218695  | 0.00478973 | 1 | 5 | 0.1218695  | 1.02643191 |
| chr6 | 158211561 | 158296076 | 84516  | 1  | 0 | 2 | 0.01091641 | 0.01091641 | 4 | 4 | 0.30102999 | 0.76005302 |
| chr6 | 158296076 | 158406859 | 110784 | 4  | 0 | 0 | 0.0429175  | 0.0429175  | 4 | 4 | 0.30102999 | 0.47744371 |
| chr6 | 158406859 | 158441992 | 35134  | 1  | 2 | 1 | 0.1218695  | 0.02162467 | 1 | 5 | 0.1218695  | 0.68214471 |
| chr6 | 158441992 | 158680478 | 238487 | 7  | 0 | 2 | 0.02162467 | 0.02162467 | 1 | 5 | 0.30102999 | 0.68214471 |
| chr6 | 158680478 | 158734787 | 54310  | 2  | 0 | 3 | 0.05670724 | 0.05670724 | 1 | 5 | 0.30102999 | 0.45545077 |
| chr6 | 158734787 | 159210371 | 475585 | 12 | 0 | 0 | 0.01598258 | 0.01598258 | 3 | 1 | 0.30102999 | 0.84395715 |
| chr6 | 159210371 | 159266498 | 56128  | 3  | 1 | 4 | 0.3812622  | 0.3812622  | 4 | 1 | 0.60763643 | 0.60763643 |
| chr6 | 159266498 | 159354145 | 87648  | 3  | 0 | 4 | 0.02074938 | 0.02074938 | 2 | 8 | 0.61140001 | 0.79906872 |
| chr6 | 159354145 | 159398227 | 44083  | 2  | 0 | 4 | 0.01077081 | 0.01077081 | 2 | 9 | 0.61140001 | 1.01542894 |
| chr6 | 159398227 | 159398527 | 301    | 2  | 0 | 5 | 0.02473314 | 0.02473314 | 2 | 9 | 0.61140001 | 0.76806864 |
| chr6 | 159398527 | 159456484 | 57958  | 1  | 0 | 5 | 0.04407651 | 0.04407651 | 2 | 8 | 0.61140001 | 0.58747015 |
| chr6 | 159456484 | 159615687 | 159204 | 2  | 0 | 5 | 0.07511598 | 0.07511598 | 2 | 7 | 0.61140001 | 0.43181735 |
| chr6 | 159615687 | 159615746 | 60     | 1  | 0 | 5 | 0.04407651 | 0.04407651 | 2 | 8 | 0.61140001 | 0.58747015 |
| chr6 | 159615746 | 159671491 | 55746  | 2  | 0 | 5 | 0.07511598 | 0.07511598 | 2 | 7 | 0.61140001 | 0.43181735 |
| chr6 | 159671491 | 159671548 | 58     | 1  | 0 | 5 | 0.04407651 | 0.04407651 | 2 | 8 | 0.61140001 | 0.58747015 |
| chr6 | 159671548 | 159820916 | 149369 | 1  | 0 | 5 | 0.07511598 | 0.07511598 | 2 | 7 | 0.61140001 | 0.43181735 |
| chr6 | 159820916 | 159820975 | 60     | 1  | 0 | 5 | 0.04407651 | 0.04407651 | 2 | 8 | 0.61140001 | 0.58747015 |
| chr6 | 159820975 | 159921850 | 100876 | 1  | 0 | 5 | 0.07511598 | 0.07511598 | 2 | 7 | 0.61140001 | 0.43181735 |
| chr6 | 159921850 | 159921909 | 60     | 1  | 0 | 5 | 0.04407651 | 0.04407651 | 3 | 8 | 0.93173516 | 0.58747015 |
| chr6 | 159921909 | 160021134 | 99226  | 1  | 0 | 4 | 0.03812622 | 0.03812622 | 7 | 6 | 0.61140001 | 0.60763643 |
| chr6 | 160021134 | 160147521 | 126388 | 4  | 0 | 4 | 0.02074938 | 0.02074938 | 2 | 8 | 0.61140001 | 0.79906872 |
| chr6 | 160147521 | 160329038 | 181518 | 11 | 1 | 4 | 0.05404976 | 0.02074938 | 2 | 8 | 0.30102999 | 0.79906872 |
| chr6 | 160329038 | 160485814 | 156777 | 3  | 0 | 4 | 0.02074938 | 0.02074938 | 2 | 8 | 0.61140001 | 0.79906872 |
| chr6 | 160485814 | 160707401 | 212588 | 7  | 0 | 5 | 0.04407651 | 0.04407651 | 2 | 8 | 0.61140001 | 0.58747015 |
| chr6 | 160707401 | 161007816 | 300416 | 9  | 0 | 2 | 0.02473314 | 0.02473314 | 2 | 9 | 0.61140001 | 0.76806864 |
| chr6 | 161007816 | 161159595 | 151780 | 3  | 0 | 5 | 0.04407651 | 0.04407651 | 2 | 8 | 0.61140001 | 0.58747015 |
| chr6 | 161159595 | 161413772 | 254178 | 4  | 0 | 5 | 0.0751159  |            |   |   |            |            |

|      |           |           |        |   |   |   |            |            |   |    |            |            |
|------|-----------|-----------|--------|---|---|---|------------|------------|---|----|------------|------------|
| chr6 | 165886755 | 165988219 | 101465 | 4 | 0 | 3 | 0          | 0.03070643 | 1 | 6  | 0.30102999 | 0.63695542 |
| chr6 | 165988219 | 165988278 | 60     | 1 | 0 | 4 | 0          | 0.02074938 | 2 | 8  | 0.61140001 | 0.79906872 |
| chr6 | 165988278 | 166071046 | 82769  | 2 | 0 | 4 | 0          | 0.03812622 | 2 | 7  | 0.61140001 | 0.60763643 |
| chr6 | 166071046 | 166203130 | 132085 | 3 | 0 | 5 | 0          | 0.04407651 | 2 | 8  | 0.61140001 | 0.58747015 |
| chr6 | 166203130 | 166393240 | 190111 | 2 | 0 | 5 | 0          | 0.07511598 | 2 | 7  | 0.61140001 | 0.43181735 |
| chr6 | 166393240 | 166393299 | 60     | 1 | 0 | 5 | 0          | 0.04407651 | 2 | 8  | 0.61140001 | 0.58747015 |
| chr6 | 166393299 | 166571083 | 177785 | 3 | 0 | 5 | 0          | 0.07511598 | 2 | 7  | 0.61140001 | 0.43181735 |
| chr6 | 166571083 | 166659302 | 88220  | 4 | 0 | 5 | 0          | 0.04407651 | 2 | 8  | 0.61140001 | 0.58747015 |
| chr6 | 166659302 | 166754981 | 95680  | 3 | 0 | 5 | 0          | 0.02473314 | 2 | 9  | 0.61140001 | 0.76808684 |
| chr6 | 166754981 | 166782268 | 27288  | 2 | 0 | 5 | 0          | 0.01320236 | 2 | 10 | 0.61140001 | 0.97390707 |
| chr6 | 166782268 | 166964963 | 182696 | 5 | 0 | 5 | 0          | 0.07511598 | 2 | 7  | 0.61140001 | 0.43181735 |
| chr6 | 166964963 | 166965020 | 58     | 1 | 0 | 5 | 0          | 0.04407651 | 2 | 8  | 0.61140001 | 0.58747015 |
| chr6 | 166965020 | 166998263 | 33244  | 1 | 0 | 5 | 0          | 0.07511598 | 2 | 7  | 0.61140001 | 0.43181735 |
| chr6 | 166998263 | 167052569 | 54307  | 2 | 0 | 5 | 0          | 0.04407651 | 2 | 8  | 0.61140001 | 0.58747015 |
| chr6 | 167052569 | 167194713 | 142145 | 3 | 0 | 4 | 0          | 0.03812622 | 2 | 7  | 0.61140001 | 0.60763643 |
| chr6 | 167194713 | 167424098 | 229386 | 6 | 0 | 4 | 0          | 0.06713722 | 2 | 6  | 0.61140001 | 0.44141547 |
| chr6 | 167424098 | 167453607 | 29510  | 3 | 0 | 4 | 0          | 0.03812622 | 2 | 7  | 0.61140001 | 0.60763643 |
| chr6 | 167453607 | 167453665 | 89759  | 2 | 0 | 4 | 0          | 0.06713722 | 2 | 6  | 0.61140001 | 0.44141547 |
| chr6 | 167453665 | 167770869 | 227505 | 7 | 0 | 4 | 0          | 0.03812622 | 2 | 7  | 0.61140001 | 0.60763643 |
| chr6 | 167770869 | 167770928 | 60     | 1 | 0 | 5 | 0          | 0.07511598 | 2 | 7  | 0.61140001 | 0.43181735 |
| chr6 | 167770928 | 167881373 | 110446 | 1 | 0 | 4 | 0          | 0.06713722 | 2 | 6  | 0.61140001 | 0.44141547 |
| chr6 | 167881373 | 168030303 | 421661 | 1 | 0 | 3 | 0          | 0.05670724 | 1 | 5  | 0.30102999 | 0.45545077 |
| chr6 | 168030303 | 168312764 | 9732   | 3 | 0 | 4 | 0          | 0.06713722 | 2 | 6  | 0.61140001 | 0.44141547 |
| chr6 | 168312764 | 168776873 | 464110 | 9 | 0 | 4 | 0          | 0.06713722 | 2 | 6  | 0.30102999 | 0.44141547 |
| chr6 | 168776873 | 168907643 | 130711 | 3 | 0 | 4 | 0          | 0.03812622 | 1 | 7  | 0.30102999 | 0.60763643 |
| chr6 | 168907643 | 168954929 | 47287  | 2 | 0 | 5 | 0          | 0.07511598 | 2 | 7  | 0.30102999 | 0.43181735 |
| chr6 | 168954929 | 169011336 | 56408  | 2 | 0 | 7 | 0          | 0.20469099 | 1 | 7  | 0.30102999 | 0.20469099 |
| chr6 | 169011336 | 169011395 | 60     | 1 | 0 | 7 | 0          | 0.20469099 | 1 | 7  | 0.61140001 | 0.20469099 |
| chr6 | 169011395 | 169200278 | 188884 | 3 | 0 | 6 | 0          | 0.129913   | 2 | 7  | 0.61140001 | 0.30102999 |
| chr6 | 169200278 | 169261781 | 61504  | 2 | 0 | 8 | 0          | 0.30102999 | 2 | 7  | 0.61140001 | 0.13493666 |
| chr6 | 169261781 | 169506562 | 244782 | 3 | 0 | 7 | 0          | 0.20469099 | 2 | 7  | 0.61140001 | 0.20469099 |
| chr6 | 169506562 | 169591031 | 84470  | 1 | 0 | 6 | 0          | 0.20064824 | 2 | 6  | 0.61140001 | 0.20064824 |
| chr6 | 169591031 | 169653664 | 62634  | 1 | 0 | 6 | 0          | 0.20064824 | 1 | 6  | 0.30102999 | 0.20064824 |
| chr6 | 169653664 | 169655578 | 1915   | 2 | 0 | 6 | 0          | 0.129913   | 1 | 7  | 0.30102999 | 0.30102999 |
| chr6 | 169655578 | 169786414 | 130837 | 2 | 0 | 6 | 0          | 0.20064824 | 1 | 6  | 0.30102999 | 0.20064824 |
| chr6 | 169786414 | 169936233 | 149820 | 4 | 0 | 6 | 0          | 0.129913   | 1 | 7  | 0.30102999 | 0.30102999 |
| chr6 | 169936233 | 170088905 | 152673 | 4 | 0 | 6 | 0          | 0.129913   | 2 | 7  | 0.61140001 | 0.30102999 |
| chr6 | 170088905 | 170088964 | 60     | 1 | 1 | 6 | 0.02438896 | 0.129913   | 3 | 7  | 0.51676182 | 0.30102999 |
| chr6 | 170088964 | 170201866 | 112903 | 4 | 1 | 5 | 0.05404976 | 0.12309572 | 6 | 6  | 0.30102999 | 0.30102999 |
| chr6 | 170201866 | 170228733 | 26688  | 2 | 1 | 5 | 0.05404976 | 0.07511598 | 2 | 7  | 0.30102999 | 0.43181735 |
| chr6 | 170228733 | 170460340 | 231608 | 2 | 0 | 5 | 0          | 0.19510895 | 1 | 5  | 0.30102999 | 0.19510895 |
| chr6 | 170460340 | 170460399 | 60     | 1 | 0 | 6 | 0          | 0.129913   | 2 | 7  | 0.61140001 | 0.30102999 |
| chr6 | 170460399 | 170726796 | 266398 | 5 | 0 | 5 | 0          | 0.19510895 | 2 | 5  | 0.61140001 | 0.19510895 |
| chr6 | 170726796 | 170890108 | 163313 | 4 | 0 | 4 | 0          | 0.11390336 | 2 | 5  | 0.61140001 | 0.30102999 |
| chr7 | 92532     | 159259    | 66728  | 3 | 2 | 0 | 0.30102999 | 0          | 1 | 1  | 0.05404976 | 0.30102999 |
| chr7 | 159259    | 195085    | 35827  | 2 | 3 | 0 | 0.51676182 | 0          | 1 | 2  | 0.02438896 | 0.61140001 |
| chr7 | 195085    | 227824    | 32740  | 1 | 2 | 0 | 0.30102999 | 0          | 1 | 1  | 0.05404976 | 0.30102999 |
| chr7 | 227824    | 558409    | 330586 | 1 | 1 | 0 | 0.1218695  | 0          | 1 | 1  | 0.1218695  | 0.30102999 |
| chr7 | 558409    | 764921    | 206513 | 3 | 4 | 0 | 0.76005302 | 0          | 1 | 2  | 0.01091641 | 0.61140001 |
| chr7 | 764921    | 764980    | 60     | 1 | 4 | 1 | 0.47744371 | 0.05404976 | 2 | 2  | 0.0429175  | 0.30102999 |
| chr7 | 764980    | 926169    | 161190 | 4 | 4 | 1 | 0.76005302 | 0.05404976 | 1 | 2  | 0.01091641 | 0.30102999 |
| chr7 | 926169    | 995544    | 69376  | 2 | 4 | 2 | 0.47744371 | 0.1575501  | 2 | 2  | 0.0429175  | 0.1575501  |
| chr7 | 995544    | 995602    | 59     | 1 | 5 | 2 | 0.30102999 | 0.08289318 | 4 | 3  | 0.11390336 | 0.30102999 |
| chr7 | 995602    | 1070935   | 75334  | 3 | 5 | 2 | 0.30102999 | 0.1575501  | 2 | 4  | 0.11390336 | 0.1575501  |
| chr7 | 1070935   | 1087076   | 16142  | 1 | 5 | 2 | 0.45545077 | 0.1575501  | 3 | 2  | 0.05670724 | 0.1575501  |
| chr7 | 1087076   | 1127485   | 40410  | 1 | 4 | 2 | 0.76005302 | 0.1575501  | 1 | 2  | 0.01091641 | 0.1575501  |
| chr7 | 1127485   | 1197306   | 69822  | 2 | 4 | 2 | 0.76005302 | 0.08289318 | 1 | 3  | 0.01091641 | 0.30102999 |
| chr7 | 1197306   | 1197365   | 60     | 1 | 4 | 2 | 0.47744371 | 0.08289318 | 2 | 3  | 0.0429175  | 0.30102999 |
| chr7 | 1197365   | 1245696   | 4832   | 1 | 4 | 2 | 0.76005302 | 0.08289318 | 1 | 3  | 0.01091641 | 0.30102999 |
| chr7 | 1245696   | 1245755   | 60     | 1 | 4 | 2 | 0.76005302 | 0.0429175  | 4 | 4  | 0.01091641 | 0.47744371 |
| chr7 | 1245755   | 1292812   | 47058  | 1 | 4 | 2 | 0.76005302 | 0.08289318 | 1 | 3  | 0.01091641 | 0.30102999 |
| chr7 | 1292812   | 1292871   | 60     | 1 | 4 | 3 | 0.76005302 | 0.17593012 | 1 | 3  | 0.01091641 | 0.17593012 |
| chr7 | 1292871   | 1468185   | 175315 | 2 | 4 | 3 | 0.76005302 | 0.30102999 | 1 | 2  | 0.01091641 | 0.08289318 |
| chr7 | 1468185   | 1541154   | 72970  | 2 | 4 | 3 | 0.76005302 | 0.17593012 | 1 | 3  | 0.01091641 | 0.17593012 |
| chr7 | 1541154   | 1541213   | 60     | 1 | 5 | 3 | 0.68214471 | 0.17593012 | 2 | 3  | 0.02162467 | 0.17593012 |
| chr7 | 1541213   | 1613355   | 72143  | 2 | 2 | 2 | 0.68214471 | 0.08289318 | 1 | 3  | 0.02162467 | 0.30102999 |
| chr7 | 1613355   | 1694406   | 81052  | 2 | 5 | 2 | 0.68214471 | 0.1575501  | 2 | 2  | 0.02162467 | 0.1575501  |
| chr7 | 1694406   | 1694465   | 60     | 1 | 6 | 2 | 0.91219088 | 0.1575501  | 2 | 2  | 0.01053319 | 0.1575501  |
| chr7 | 1694465   | 1737760   | 43296  | 1 | 5 | 2 | 1.02643191 | 0.1575501  | 1 | 2  | 0.00478973 | 0.1575501  |
| chr7 | 1737760   | 1737819   | 60     | 1 | 5 | 3 | 1.02643191 | 0.30102999 | 1 | 2  | 0.00478973 | 0.08289318 |
| chr7 | 1737819   | 1779563   | 41745  | 1 | 5 | 3 | 1.02643191 | 0.51676182 | 1 | 1  | 0.00478973 | 0.02438896 |
| chr7 | 1779563   | 1828396   | 48834  | 2 | 5 | 3 | 0.68214471 | 0.51676182 | 2 | 1  | 0.02162467 | 0.02438896 |
| chr7 | 1828396   | 1828455   | 60     | 1 | 5 | 3 | 0.68214471 | 0.30102999 | 2 | 2  | 0.02162467 | 0.08289318 |
| chr7 | 1828455   | 1886724   | 58270  | 1 | 5 | 2 | 0.68214471 | 0.1575501  | 2 | 2  | 0.02162467 | 0.1575501  |
| chr7 | 1886724   | 1886783   | 60     | 1 | 5 | 2 | 0.30102999 | 0.08289318 | 4 | 3  | 0.11390336 | 0.30102999 |
| chr7 | 1886783   | 1958292   | 71510  | 1 | 5 | 2 | 0.45545077 | 0.08289318 | 3 | 3  | 0.05670724 | 0.30102999 |
| chr7 | 1958292   | 2033390   | 75099  | 2 | 5 | 2 | 0.45545077 | 0.30102999 | 3 | 1  | 0.05670724 | 0.05404976 |
| chr7 | 2033390   | 2112167   | 78778  | 2 | 5 | 2 | 0.68214471 | 0.30102999 | 2 | 1  | 0.02162467 | 0.05404976 |
| chr7 | 2112167   | 2112226   | 60     | 1 | 5 | 3 | 0.68214471 | 0.51676182 | 2 | 1  | 0.02162467 | 0.02438896 |
| chr7 | 2112226   | 2149076   | 36851  | 1 | 4 | 3 | 0.47744371 | 0.51676182 | 2 | 1  | 0.0429175  | 0.02438896 |
| chr7 | 2149076   | 2149134   | 59     | 1 | 5 | 3 | 0.68214471 | 0.30102999 | 2 | 2  | 0.02162467 | 0.08289318 |
| chr7 | 2149134   | 2570278   | 421145 | 9 | 4 | 1 | 0.47744371 | 0.1218695  | 2 | 1  | 0.0429175  | 0.1218695  |
| chr7 | 2570278   | 2664449   | 94172  | 3 | 4 | 1 | 0.51676182 | 0.1218695  | 1 | 1  | 0.02438896 | 0.1218695  |
| chr7 | 2664449   | 2913754   | 249306 | 5 | 3 | 0 | 0.51676182 | 0          | 1 | 1  | 0.02438896 | 0.30102999 |
| chr7 | 2913754   | 2960602   | 46849  | 3 | 1 | 0 | 0.51676182 | 0.1218695  | 1 | 1  | 0.02438896 | 0.1218695  |
| chr7 | 2960602   | 3305603   | 345002 | 6 | 3 | 0 | 0.51676182 | 0          | 1 | 1  | 0.02438896 | 0.30102999 |
| chr7 | 3305603   | 3347071   | 41469  | 2 | 3 | 1 | 0.30102999 | 0.1218695  | 1 | 1  | 0.08289318 | 0.1218695  |
| chr7 | 3347071   | 3772851   | 425781 | 8 | 3 | 0 | 0.30102999 | 0          | 2 | 1  | 0.08289318 | 0.30102999 |
| chr7 | 3772851   | 3772910   | 60     | 1 | 1 | 3 | 0.30102999 | 0.1218695  | 2 | 1  | 0.08289318 | 0.1218695  |
| chr7 | 3772910   | 3859349   | 86440  | 2 | 3 | 1 | 0.51676182 | 0.1218695  | 1 | 1  | 0.02438896 | 0.1218695  |
| chr7 | 3859349   | 3956823   | 97475  | 3 | 2 | 0 | 0.51676182 | 0.30102999 | 1 | 1  | 0.02438896 | 0.05404976 |
| chr7 | 3956823   | 3956882   | 60     | 1 | 3 | 2 | 0.30102999 | 0.30102999 | 2 | 1  | 0.08289318 | 0.05404976 |
| chr7 | 3956882   | 4017824   | 60943  | 1 | 3 | 2 | 0.51676182 | 0.30102999 | 1 | 1  | 0.02438896 | 0.05404976 |
| chr7 | 4017824   | 4017883   | 60     | 1 | 4 | 2 | 0.76005    |            |   |    |            |            |

|      |          |          |        |   |   |   |            |            |   |     |            |            |
|------|----------|----------|--------|---|---|---|------------|------------|---|-----|------------|------------|
| chr7 | 6383509  | 6536408  | 152900 | 3 | 3 | 0 | 0.30102999 | 0          | 2 | 1   | 0.08289318 | 0.30102999 |
| chr7 | 6536408  | 6659432  | 123025 | 4 | 3 | 1 | 0.30102999 | 0.1218695  | 2 | 1   | 0.08289318 | 0.1218695  |
| chr7 | 6659432  | 6777262  | 117831 | 2 | 3 | 0 | 0.30102999 | 0          | 2 | 1   | 0.08289318 | 0.30102999 |
| chr7 | 6777262  | 6870884  | 93623  | 2 | 3 | 0 | 0.17593012 | 0          | 3 | 1   | 0.17593012 | 0.30102999 |
| chr7 | 6870884  | 7137521  | 266638 | 3 | 3 | 0 | 0.10122019 | 0          | 4 | 1   | 0.30102999 | 0.30102999 |
| chr7 | 7137521  | 7268479  | 130959 | 3 | 3 | 0 | 0.05670724 | 0          | 5 | 2   | 0.45545077 | 0.61140001 |
| chr7 | 7268479  | 7335136  | 66658  | 1 | 3 | 0 | 0.10122019 | 0          | 4 | 2   | 0.30102999 | 0.61140001 |
| chr7 | 7335136  | 7462326  | 127191 | 2 | 3 | 0 | 0.10122019 | 0          | 4 | 1   | 0.30102999 | 0.30102999 |
| chr7 | 7462326  | 7462385  | 60     | 1 | 3 | 0 | 0.05670724 | 0          | 5 | 1   | 0.45545077 | 0.30102999 |
| chr7 | 7462385  | 7554879  | 92495  | 2 | 3 | 0 | 0.10122019 | 0          | 4 | 1   | 0.30102999 | 0.30102999 |
| chr7 | 7554879  | 7554938  | 60     | 1 | 3 | 0 | 0.05670724 | 0          | 5 | 2   | 0.45545077 | 0.61140001 |
| chr7 | 7554938  | 7690102  | 135165 | 3 | 3 | 0 | 0.17593012 | 0          | 3 | 2   | 0.17593012 | 0.61140001 |
| chr7 | 7690102  | 7770105  | 80004  | 2 | 3 | 0 | 0.10122019 | 0          | 4 | 2   | 0.30102999 | 0.61140001 |
| chr7 | 7770105  | 7770164  | 60     | 1 | 3 | 1 | 0.05670724 | 0.02438896 | 5 | 3   | 0.45545077 | 0.51676182 |
| chr7 | 7770164  | 8024246  | 254083 | 5 | 3 | 0 | 0.05670724 | 0          | 5 | 2   | 0.45545077 | 0.61140001 |
| chr7 | 8024246  | 8024305  | 60     | 1 | 3 | 1 | 0.03070643 | 0.02438896 | 6 | 3   | 0.63695542 | 0.51676182 |
| chr7 | 8024305  | 8122630  | 98326  | 2 | 3 | 0 | 0.05670724 | 0          | 5 | 2   | 0.45545077 | 0.61140001 |
| chr7 | 8122630  | 8383976  | 261347 | 6 | 3 | 0 | 0.05670724 | 0          | 5 | 1   | 0.45545077 | 0.30102999 |
| chr7 | 8383976  | 8384035  | 60     | 1 | 3 | 0 | 0.03070643 | 0          | 6 | 2   | 0.63695542 | 0.61140001 |
| chr7 | 8384035  | 8515960  | 135926 | 2 | 3 | 0 | 0.05670724 | 0          | 5 | 2   | 0.45545077 | 0.61140001 |
| chr7 | 8515960  | 8520019  | 60     | 1 | 3 | 0 | 0.03070643 | 0          | 6 | 2   | 0.63695542 | 0.61140001 |
| chr7 | 8520019  | 8602125  | 82107  | 2 | 3 | 0 | 0.10122019 | 0          | 4 | 1   | 0.30102999 | 0.30102999 |
| chr7 | 8602125  | 8717542  | 115418 | 2 | 3 | 0 | 0.17593012 | 0          | 3 | 1   | 0.17593012 | 0.30102999 |
| chr7 | 8717542  | 8872243  | 154702 | 2 | 2 | 0 | 0.08289318 | 0          | 3 | 1   | 0.30102999 | 0.30102999 |
| chr7 | 8872243  | 8872302  | 60     | 1 | 2 | 0 | 0.08289318 | 0          | 3 | 2   | 0.30102999 | 0.61140001 |
| chr7 | 8872302  | 9197157  | 324856 | 3 | 2 | 0 | 0.08289318 | 0          | 3 | 1   | 0.30102999 | 0.30102999 |
| chr7 | 9197157  | 9271055  | 73899  | 2 | 0 | 0 | 0.0429175  | 0          | 4 | 1   | 0.47744371 | 0.30102999 |
| chr7 | 9271055  | 9271114  | 60     | 1 | 2 | 0 | 0.02162467 | 0          | 5 | 1   | 0.68214471 | 0.30102999 |
| chr7 | 9271114  | 9737453  | 466340 | 3 | 2 | 0 | 0.08289318 | 0          | 3 | 1   | 0.30102999 | 0.30102999 |
| chr7 | 9737453  | 10146085 | 408633 | 3 | 1 | 0 | 0.02438896 | 0          | 3 | 1   | 0.51676182 | 0.30102999 |
| chr7 | 10146085 | 10146144 | 60     | 1 | 2 | 0 | 0.0429175  | 0          | 4 | 2   | 0.47744371 | 0.61140001 |
| chr7 | 10146144 | 10246323 | 100180 | 1 | 0 | 0 | 0.02438896 | 0          | 3 | 2   | 0.51676182 | 0.61140001 |
| chr7 | 10246323 | 10511035 | 264713 | 3 | 1 | 2 | 0.02438896 | 0.1575501  | 3 | 2   | 0.51676182 | 0.1575501  |
| chr7 | 10511035 | 10609866 | 98832  | 3 | 2 | 0 | 0.08289318 | 0.1575501  | 3 | 2   | 0.30102999 | 0.1575501  |
| chr7 | 10609866 | 10676324 | 66459  | 2 | 3 | 2 | 0.17593012 | 0.1575501  | 2 | 2   | 0.17593012 | 0.1575501  |
| chr7 | 10676324 | 10747918 | 71595  | 2 | 2 | 0 | 0.10122019 | 0.1575501  | 4 | 2   | 0.30102999 | 0.1575501  |
| chr7 | 10747918 | 10795079 | 47162  | 1 | 3 | 1 | 0.10122019 | 0.05404976 | 4 | 2   | 0.30102999 | 0.30102999 |
| chr7 | 10795079 | 10958707 | 163629 | 2 | 3 | 1 | 0.05670724 | 0.05404976 | 5 | 2   | 0.45545077 | 0.30102999 |
| chr7 | 10958707 | 11173509 | 214803 | 6 | 3 | 1 | 0.03070643 | 0.05404976 | 6 | 2   | 0.63695542 | 0.30102999 |
| chr7 | 11173509 | 11173568 | 60     | 1 | 3 | 1 | 0.03070643 | 0.02438896 | 6 | 3   | 0.63695542 | 0.51676182 |
| chr7 | 11173568 | 11302301 | 128734 | 1 | 3 | 0 | 0.05670724 | 0.02438896 | 5 | 3   | 0.45545077 | 0.51676182 |
| chr7 | 11302301 | 11445872 | 143572 | 4 | 3 | 2 | 0.05670724 | 0.08289318 | 5 | 3   | 0.45545077 | 0.30102999 |
| chr7 | 11445872 | 11628329 | 182458 | 3 | 3 | 1 | 0.05670724 | 0.02438896 | 5 | 3   | 0.45545077 | 0.51676182 |
| chr7 | 11628329 | 11754376 | 126048 | 2 | 2 | 1 | 0.02162467 | 0.02438896 | 5 | 3   | 0.68214471 | 0.51676182 |
| chr7 | 11754376 | 11843297 | 88922  | 2 | 1 | 0 | 0.01053319 | 0.02438896 | 6 | 3   | 0.91219088 | 0.51676182 |
| chr7 | 11843297 | 11974866 | 131570 | 3 | 2 | 1 | 0.01053319 | 0.05404976 | 6 | 2   | 0.91219088 | 0.30102999 |
| chr7 | 11974866 | 11974925 | 60     | 1 | 2 | 1 | 0.01053319 | 0.02438896 | 6 | 3   | 0.91219088 | 0.51676182 |
| chr7 | 11974925 | 12193099 | 218175 | 2 | 2 | 1 | 0.02162467 | 0.02438896 | 5 | 3   | 0.68214471 | 0.51676182 |
| chr7 | 12193099 | 12258124 | 65026  | 3 | 2 | 1 | 0.00493743 | 0.02438896 | 7 | 3   | 1.16581773 | 0.51676182 |
| chr7 | 12258124 | 12305539 | 47416  | 1 | 2 | 1 | 0.02162467 | 0.02438896 | 5 | 3   | 0.68214471 | 0.51676182 |
| chr7 | 12305539 | 12351994 | 46456  | 1 | 2 | 1 | 0.0429175  | 0.02438896 | 4 | 3   | 0.47744371 | 0.51676182 |
| chr7 | 12351994 | 12352046 | 53     | 1 | 3 | 1 | 0.05670724 | 0.02438896 | 5 | 3   | 0.45545077 | 0.51676182 |
| chr7 | 12352046 | 12409890 | 57845  | 1 | 2 | 1 | 0.02162467 | 0.02438896 | 5 | 3   | 0.68214471 | 0.51676182 |
| chr7 | 12409890 | 12409949 | 60     | 1 | 2 | 1 | 0.01053319 | 0.02438896 | 6 | 3   | 0.91219088 | 0.51676182 |
| chr7 | 12409949 | 12534238 | 124290 | 3 | 2 | 1 | 0.02162467 | 0.02438896 | 5 | 3   | 0.68214471 | 0.51676182 |
| chr7 | 12534238 | 12594626 | 60389  | 2 | 2 | 1 | 0.01053319 | 0.02438896 | 6 | 3   | 0.91219088 | 0.51676182 |
| chr7 | 12594626 | 12728910 | 134285 | 3 | 2 | 0 | 0.02162467 | 0          | 5 | 3   | 0.68214471 | 0.93173516 |
| chr7 | 12728910 | 12920612 | 191703 | 2 | 2 | 0 | 0.0429175  | 0          | 4 | 3   | 0.47744371 | 0.93173516 |
| chr7 | 12920612 | 13218621 | 298010 | 3 | 2 | 0 | 0.08289318 | 0          | 3 | 2   | 0.30102999 | 0.93173516 |
| chr7 | 13218621 | 13218680 | 60     | 1 | 2 | 1 | 0.08289318 | 0.02438896 | 3 | 3   | 0.30102999 | 0.51676182 |
| chr7 | 13218680 | 13327050 | 108371 | 1 | 2 | 0 | 0.08289318 | 0          | 3 | 2   | 0.30102999 | 0.61140001 |
| chr7 | 13327050 | 13327109 | 60     | 1 | 2 | 0 | 0.0429175  | 0          | 4 | 2   | 0.47744371 | 0.61140001 |
| chr7 | 13327109 | 13642792 | 315684 | 2 | 2 | 0 | 0.0429175  | 0          | 4 | 1   | 0.47744371 | 0.30102999 |
| chr7 | 13642792 | 13642851 | 60     | 1 | 2 | 0 | 0.0429175  | 0          | 4 | 2   | 0.47744371 | 0.61140001 |
| chr7 | 13642851 | 13926260 | 283410 | 2 | 2 | 0 | 0.0429175  | 0          | 4 | 1   | 0.47744371 | 0.30102999 |
| chr7 | 13926260 | 13946246 | 19897  | 3 | 1 | 0 | 0.10122019 | 0.02438896 | 4 | 3   | 0.30102999 | 0.51676182 |
| chr7 | 13946246 | 13978897 | 32652  | 1 | 3 | 1 | 0.10122019 | 0.05404976 | 4 | 2   | 0.30102999 | 0.30102999 |
| chr7 | 13978897 | 14097341 | 118445 | 2 | 3 | 1 | 0.17593012 | 0.05404976 | 3 | 2   | 0.17593012 | 0.30102999 |
| chr7 | 14097341 | 14188314 | 90974  | 2 | 3 | 2 | 0.17593012 | 0.1575501  | 3 | 2   | 0.17593012 | 0.1575501  |
| chr7 | 14188314 | 14216326 | 28013  | 2 | 3 | 2 | 0.10122019 | 0.1575501  | 4 | 2   | 0.30102999 | 0.1575501  |
| chr7 | 14216326 | 14326541 | 110216 | 2 | 2 | 1 | 0.17593012 | 0.1575501  | 3 | 2   | 0.17593012 | 0.1575501  |
| chr7 | 14326541 | 14378115 | 51575  | 1 | 2 | 0 | 0.08289318 | 0.1575501  | 3 | 2   | 0.30102999 | 0.1575501  |
| chr7 | 14378115 | 14443860 | 65746  | 2 | 2 | 3 | 0.08289318 | 0.30102999 | 3 | 2   | 0.30102999 | 0.08289318 |
| chr7 | 14443860 | 14491342 | 47483  | 2 | 3 | 3 | 0.17593012 | 0.30102999 | 3 | 2   | 0.17593012 | 0.08289318 |
| chr7 | 14491342 | 14545745 | 54404  | 1 | 3 | 2 | 0.17593012 | 0.1575501  | 3 | 2   | 0.17593012 | 0.1575501  |
| chr7 | 14545745 | 14545804 | 60     | 1 | 3 | 2 | 0.10122019 | 0.1575501  | 4 | 2   | 0.30102999 | 0.1575501  |
| chr7 | 14545804 | 14581695 | 35892  | 1 | 3 | 2 | 0.17593012 | 0.1575501  | 3 | 2   | 0.17593012 | 0.1575501  |
| chr7 | 14581695 | 14661078 | 79384  | 3 | 3 | 3 | 0.17593012 | 0.30102999 | 3 | 2   | 0.17593012 | 0.08289318 |
| chr7 | 14661078 | 14760901 | 99824  | 3 | 3 | 3 | 0.17593012 | 0.17593012 | 3 | 3   | 0.17593012 | 0.17593012 |
| chr7 | 14760901 | 14802209 | 41309  | 2 | 3 | 0 | 0.05670724 | 0.17593012 | 5 | 3   | 0.45545077 | 0.17593012 |
| chr7 | 14802209 | 14849628 | 47420  | 2 | 3 | 4 | 0.05670724 | 0.30102999 | 5 | 3   | 0.45545077 | 0.10122019 |
| chr7 | 14849628 | 14951256 | 101629 | 2 | 2 | 4 | 0.0429175  | 0.30102999 | 4 | 3   | 0.47744371 | 0.10122019 |
| chr7 | 14951256 | 15016581 | 65326  | 2 | 3 | 4 | 0.05670724 | 0.30102999 | 5 | 3   | 0.45545077 | 0.10122019 |
| chr7 | 15016581 | 15016640 | 60     | 1 | 3 | 5 | 0.05670724 | 0.45545077 | 5 | 3   | 0.45545077 | 0.05670724 |
| chr7 | 15016640 | 15079109 | 62470  | 1 | 2 | 5 | 0.0429175  | 0.45545077 | 4 | 3   | 0.47744371 | 0.05670724 |
| chr7 | 15079109 | 15173336 | 94228  | 2 | 2 | 2 | 0.0429175  | 0.30102999 | 4 | 3   | 0.47744371 | 0.10122019 |
| chr7 | 15173336 | 15173395 | 60     | 1 | 3 | 5 | 0.10122019 | 0.45545077 | 4 | 3   | 0.30102999 | 0.05670724 |
| chr7 | 15173395 | 15307077 | 133683 | 3 | 2 | 4 | 0.0429175  | 0.30102999 | 4 | 3   | 0.47744371 | 0.10122019 |
| chr7 | 15307077 | 15431079 | 124003 | 2 | 5 | 4 | 0.0429175  | 0.45545077 | 4 | 3   | 0.47744371 | 0.05670724 |
| chr7 | 15431079 | 15870023 | 438945 | 7 | 2 | 4 | 0.0429175  | 0.30102999 | 4 | 3   | 0.47744371 | 0.10122019 |
| chr7 | 15870023 | 15870082 | 60     | 1 | 4 | 4 | 0.11390336 | 0.30102999 | 5 | 3   | 0.30102999 | 0.10122019 |
| chr7 | 15870082 | 15926980 | 56899  | 1 | 2 | 3 | 0.0429175  | 0.17593012 | 4 | 3   | 0.47744371 | 0.17593012 |
| chr7 | 15926980 | 15994292 | 67313  | 2 | 3 | 3 | 0.10122019 | 0.17593012 | 4 | 3</ |            |            |



|      |          |          |        |    |   |   |            |            |   |   |            |            |
|------|----------|----------|--------|----|---|---|------------|------------|---|---|------------|------------|
| chr7 | 18925823 | 18963231 | 37409  | 2  | 4 | 3 | 0.76005302 | 0.30102999 | 1 | 2 | 0.01091641 | 0.08289318 |
| chr7 | 18963231 | 18991887 | 28657  | 1  | 3 | 3 | 0.51676182 | 0.30102999 | 1 | 2 | 0.02438896 | 0.08289318 |
| chr7 | 18991887 | 19039777 | 47891  | 3  | 4 | 4 | 0.51676182 | 0.47744371 | 1 | 2 | 0.02438896 | 0.0429175  |
| chr7 | 19039777 | 19095444 | 55668  | 1  | 3 | 4 | 0.51676182 | 0.76005302 | 1 | 1 | 0.02438896 | 0.01091641 |
| chr7 | 19095444 | 19095503 | 60     | 1  | 3 | 4 | 0.30102999 | 0.76005302 | 2 | 1 | 0.08289318 | 0.01091641 |
| chr7 | 19095503 | 19185418 | 89916  | 3  | 3 | 4 | 0.51676182 | 0.76005302 | 1 | 1 | 0.02438896 | 0.01091641 |
| chr7 | 19185418 | 19335351 | 149934 | 1  | 3 | 3 | 0.51676182 | 0.51676182 | 1 | 1 | 0.02438896 | 0.02438896 |
| chr7 | 19335351 | 19335410 | 60     | 1  | 3 | 3 | 0.30102999 | 0.51676182 | 2 | 1 | 0.08289318 | 0.02438896 |
| chr7 | 19335410 | 19506913 | 171504 | 1  | 3 | 2 | 0.30102999 | 0.30102999 | 2 | 1 | 0.08289318 | 0.05404976 |
| chr7 | 19506913 | 19616004 | 109092 | 2  | 3 | 2 | 0.17593012 | 0.30102999 | 3 | 1 | 0.17593012 | 0.05404976 |
| chr7 | 19616004 | 19761586 | 145583 | 2  | 3 | 3 | 0.17593012 | 0.30102999 | 3 | 2 | 0.17593012 | 0.08289318 |
| chr7 | 19761586 | 19791510 | 29925  | 1  | 3 | 3 | 0.17593012 | 0.17593012 | 3 | 3 | 0.17593012 | 0.17593012 |
| chr7 | 19791510 | 19845493 | 53984  | 1  | 3 | 3 | 0.17593012 | 0.30102999 | 3 | 2 | 0.17593012 | 0.08289318 |
| chr7 | 19845493 | 19983239 | 137747 | 1  | 2 | 3 | 0.1575501  | 0.51676182 | 2 | 1 | 0.1575501  | 0.02438896 |
| chr7 | 19983239 | 20180778 | 197540 | 2  | 2 | 2 | 0.1575501  | 0.30102999 | 2 | 1 | 0.1575501  | 0.05404976 |
| chr7 | 20180778 | 20308338 | 127561 | 1  | 2 | 1 | 0.30102999 | 0.1218695  | 1 | 1 | 0.05404976 | 0.1218695  |
| chr7 | 20308338 | 20308397 | 60     | 1  | 2 | 2 | 0.1575501  | 0.30102999 | 2 | 1 | 0.1575501  | 0.05404976 |
| chr7 | 20308397 | 20513161 | 204765 | 5  | 2 | 1 | 0.30102999 | 0.1218695  | 1 | 1 | 0.05404976 | 0.1218695  |
| chr7 | 20513161 | 20513220 | 60     | 1  | 2 | 2 | 0.30102999 | 0.30102999 | 1 | 1 | 0.05404976 | 0.05404976 |
| chr7 | 20513220 | 20601079 | 87860  | 2  | 1 | 1 | 0.30102999 | 0.1218695  | 1 | 1 | 0.05404976 | 0.1218695  |
| chr7 | 20601079 | 20647463 | 46385  | 1  | 2 | 1 | 0.1575501  | 0.1218695  | 2 | 1 | 0.1575501  | 0.1218695  |
| chr7 | 20647463 | 20689690 | 42228  | 2  | 3 | 2 | 0.17593012 | 0.1575501  | 2 | 1 | 0.17593012 | 0.1575501  |
| chr7 | 20689690 | 20890868 | 201179 | 5  | 3 | 2 | 0.30102999 | 0.1575501  | 2 | 2 | 0.08289318 | 0.1575501  |
| chr7 | 20890868 | 20890927 | 60     | 1  | 2 | 2 | 0.30102999 | 0.08289318 | 2 | 2 | 0.08289318 | 0.30102999 |
| chr7 | 20890927 | 21266273 | 375347 | 3  | 3 | 1 | 0.30102999 | 0.05404976 | 2 | 2 | 0.08289318 | 0.30102999 |
| chr7 | 21266273 | 21457292 | 191020 | 3  | 2 | 2 | 0.30102999 | 0.08289318 | 2 | 3 | 0.08289318 | 0.30102999 |
| chr7 | 21457292 | 21505732 | 48441  | 2  | 3 | 3 | 0.30102999 | 0.17593012 | 2 | 3 | 0.08289318 | 0.17593012 |
| chr7 | 21505732 | 21603894 | 98163  | 4  | 3 | 2 | 0.30102999 | 0.1575501  | 2 | 2 | 0.08289318 | 0.1575501  |
| chr7 | 21603894 | 21603953 | 60     | 1  | 3 | 2 | 0.17593012 | 0.1575501  | 2 | 1 | 0.17593012 | 0.1575501  |
| chr7 | 21603953 | 21644667 | 40715  | 2  | 2 | 2 | 0.30102999 | 0.1575501  | 2 | 2 | 0.08289318 | 0.1575501  |
| chr7 | 21644667 | 21729443 | 84777  | 2  | 3 | 1 | 0.30102999 | 0.05404976 | 2 | 2 | 0.08289318 | 0.30102999 |
| chr7 | 21729443 | 21729502 | 60     | 1  | 3 | 1 | 0.17593012 | 0.05404976 | 3 | 2 | 0.17593012 | 0.30102999 |
| chr7 | 21729502 | 21784060 | 54559  | 1  | 3 | 1 | 0.30102999 | 0.05404976 | 2 | 2 | 0.08289318 | 0.30102999 |
| chr7 | 21784060 | 21784119 | 60     | 1  | 4 | 1 | 0.47744371 | 0.05404976 | 2 | 2 | 0.0429175  | 0.30102999 |
| chr7 | 21784119 | 21857833 | 73715  | 2  | 3 | 1 | 0.30102999 | 0.05404976 | 2 | 2 | 0.08289318 | 0.30102999 |
| chr7 | 21857833 | 21857892 | 60     | 1  | 4 | 1 | 0.47744371 | 0.05404976 | 2 | 2 | 0.0429175  | 0.30102999 |
| chr7 | 21857892 | 21940938 | 83047  | 2  | 4 | 0 | 0.47744371 | 0          | 2 | 2 | 0.0429175  | 0.61140001 |
| chr7 | 21940938 | 21984723 | 43786  | 3  | 4 | 0 | 0.11390336 | 0          | 5 | 2 | 0.30102999 | 0.61140001 |
| chr7 | 21984723 | 22293469 | 30874  | 5  | 4 | 0 | 0.30102999 | 0          | 3 | 2 | 0.10122019 | 0.61140001 |
| chr7 | 22293469 | 22328002 | 34534  | 2  | 4 | 1 | 0.30102999 | 0.05404976 | 3 | 2 | 0.10122019 | 0.30102999 |
| chr7 | 22328002 | 22328061 | 60     | 1  | 4 | 2 | 0.18734596 | 0.1575501  | 4 | 2 | 0.18734596 | 0.1575501  |
| chr7 | 22328061 | 22393332 | 65272  | 2  | 4 | 2 | 0.30102999 | 0.1575501  | 3 | 2 | 0.10122019 | 0.1575501  |
| chr7 | 22393332 | 22393391 | 60     | 1  | 4 | 3 | 0.18734596 | 0.30102999 | 4 | 2 | 0.18734596 | 0.08289318 |
| chr7 | 22393391 | 22497220 | 103830 | 2  | 4 | 2 | 0.30102999 | 0.1575501  | 3 | 2 | 0.10122019 | 0.1575501  |
| chr7 | 22497220 | 22527063 | 29844  | 2  | 4 | 4 | 0.30102999 | 0.47744371 | 3 | 2 | 0.10122019 | 0.0429175  |
| chr7 | 22527063 | 22574223 | 47161  | 1  | 4 | 3 | 0.30102999 | 0.30102999 | 3 | 2 | 0.10122019 | 0.08289318 |
| chr7 | 22574223 | 22609575 | 35353  | 1  | 4 | 2 | 0.30102999 | 0.1575501  | 3 | 2 | 0.10122019 | 0.1575501  |
| chr7 | 22609575 | 22609634 | 60     | 1  | 4 | 4 | 0.30102999 | 0.47744371 | 2 | 2 | 0.10122019 | 0.0429175  |
| chr7 | 22609634 | 22719884 | 110251 | 2  | 4 | 1 | 0.30102999 | 0.05404976 | 3 | 2 | 0.10122019 | 0.30102999 |
| chr7 | 22719884 | 22855197 | 135314 | 4  | 4 | 2 | 0.30102999 | 0.1575501  | 3 | 2 | 0.10122019 | 0.1575501  |
| chr7 | 22855197 | 22859924 | 4728   | 2  | 4 | 2 | 0.18734596 | 0.1575501  | 4 | 2 | 0.18734596 | 0.1575501  |
| chr7 | 22859924 | 22935369 | 75446  | 2  | 4 | 2 | 0.30102999 | 0.1575501  | 3 | 2 | 0.10122019 | 0.1575501  |
| chr7 | 22935369 | 23004041 | 68673  | 2  | 4 | 2 | 0.30102999 | 0.08289318 | 3 | 3 | 0.10122019 | 0.30102999 |
| chr7 | 23004041 | 23004100 | 60     | 1  | 4 | 2 | 0.18734596 | 0.08289318 | 4 | 3 | 0.18734596 | 0.30102999 |
| chr7 | 23004100 | 23205582 | 201483 | 4  | 4 | 2 | 0.18734596 | 0.1575501  | 4 | 2 | 0.18734596 | 0.1575501  |
| chr7 | 23205582 | 23270882 | 65301  | 1  | 4 | 1 | 0.18734596 | 0.05404976 | 4 | 2 | 0.18734596 | 0.30102999 |
| chr7 | 23270882 | 23340533 | 69652  | 4  | 4 | 1 | 0.30102999 | 0.05404976 | 2 | 2 | 0.10122019 | 0.30102999 |
| chr7 | 23340533 | 23417837 | 77305  | 3  | 4 | 1 | 0.18734596 | 0.05404976 | 4 | 2 | 0.18734596 | 0.30102999 |
| chr7 | 23417837 | 23417896 | 60     | 1  | 4 | 2 | 0.18734596 | 0.1575501  | 4 | 2 | 0.18734596 | 0.1575501  |
| chr7 | 23417896 | 23493995 | 76100  | 2  | 3 | 2 | 0.17593012 | 0.1575501  | 3 | 2 | 0.17593012 | 0.1575501  |
| chr7 | 23493995 | 23494054 | 60     | 1  | 4 | 2 | 0.18734596 | 0.1575501  | 2 | 2 | 0.18734596 | 0.1575501  |
| chr7 | 23494054 | 23564766 | 70713  | 2  | 3 | 2 | 0.17593012 | 0.1575501  | 3 | 2 | 0.17593012 | 0.1575501  |
| chr7 | 23564766 | 23981753 | 416988 | 10 | 3 | 3 | 0.17593012 | 0.17593012 | 3 | 3 | 0.17593012 | 0.17593012 |
| chr7 | 23981753 | 24038809 | 57021  | 1  | 3 | 3 | 0.17593012 | 0.30102999 | 3 | 2 | 0.17593012 | 0.08289318 |
| chr7 | 24038809 | 24126329 | 87521  | 3  | 2 | 2 | 0.1575501  | 0.1575501  | 3 | 2 | 0.17593012 | 0.1575501  |
| chr7 | 24126329 | 24215940 | 89612  | 2  | 3 | 3 | 0.17593012 | 0.08289318 | 3 | 2 | 0.17593012 | 0.30102999 |
| chr7 | 24215940 | 24388957 | 73018  | 3  | 4 | 2 | 0.30102999 | 0.08289318 | 2 | 2 | 0.08289318 | 0.30102999 |
| chr7 | 24388957 | 24327835 | 38879  | 3  | 3 | 3 | 0.30102999 | 0.18734596 | 2 | 4 | 0.08289318 | 0.18734596 |
| chr7 | 24327835 | 24469114 | 141280 | 1  | 3 | 3 | 0.30102999 | 0.10122019 | 2 | 2 | 0.08289318 | 0.30102999 |
| chr7 | 24469114 | 24703338 | 234225 | 4  | 3 | 1 | 0.30102999 | 0.01091641 | 2 | 4 | 0.08289318 | 0.76005302 |
| chr7 | 24703338 | 24846488 | 143151 | 3  | 0 | 2 | 0.30102999 | 0          | 2 | 2 | 0.08289318 | 0.61140001 |
| chr7 | 24846488 | 25025817 | 179330 | 6  | 3 | 0 | 0.17593012 | 0          | 3 | 2 | 0.17593012 | 0.61140001 |
| chr7 | 25025817 | 25158549 | 132733 | 1  | 3 | 2 | 0.30102999 | 0          | 2 | 2 | 0.08289318 | 0.61140001 |
| chr7 | 25158549 | 25219261 | 60713  | 3  | 3 | 0 | 0.30102999 | 0          | 3 | 3 | 0.08289318 | 0.93173516 |
| chr7 | 25219261 | 25673259 | 453999 | 5  | 3 | 1 | 0.30102999 | 0.02438896 | 2 | 3 | 0.08289318 | 0.51676182 |
| chr7 | 25673259 | 25673318 | 60     | 1  | 4 | 1 | 0.47744371 | 0.02438896 | 2 | 3 | 0.0429175  | 0.51676182 |
| chr7 | 25673318 | 25743493 | 70176  | 1  | 3 | 1 | 0.30102999 | 0.02438896 | 2 | 3 | 0.08289318 | 0.51676182 |
| chr7 | 25743493 | 25827607 | 84115  | 1  | 2 | 1 | 0.1575501  | 0.02438896 | 3 | 3 | 0.1575501  | 0.51676182 |
| chr7 | 25827607 | 25827666 | 60     | 1  | 1 | 1 | 0.1575501  | 0.01091641 | 2 | 4 | 0.1575501  | 0.76005302 |
| chr7 | 25827666 | 25979147 | 151482 | 2  | 1 | 1 | 0.30102999 | 0.02438896 | 1 | 3 | 0.05404976 | 0.51676182 |
| chr7 | 25979147 | 25979206 | 60     | 1  | 2 | 1 | 0.0429175  | 0.02438896 | 4 | 4 | 0.47744371 | 0.51676182 |
| chr7 | 25979206 | 26207388 | 228183 | 3  | 2 | 1 | 0.1575501  | 0.02438896 | 2 | 3 | 0.1575501  | 0.51676182 |
| chr7 | 26207388 | 26207447 | 60     | 1  | 1 | 1 | 0.18734596 | 0.02438896 | 4 | 3 | 0.18734596 | 0.51676182 |
| chr7 | 26207447 | 26223793 | 16347  | 1  | 3 | 1 | 0.10122019 | 0.02438896 | 4 | 3 | 0.30102999 | 0.51676182 |
| chr7 | 26223793 | 26237479 | 13687  | 2  | 3 | 1 | 0.17593012 | 0.02438896 | 3 | 3 | 0.17593012 | 0.51676182 |
| chr7 | 26237479 | 26333612 | 96134  | 3  | 3 | 1 | 0.10122019 | 0.02438896 | 4 | 3 | 0.30102999 | 0.51676182 |
| chr7 | 26333612 | 26404648 | 71037  | 3  | 1 | 1 | 0.17593012 | 0.02438896 | 3 | 3 | 0.17593012 | 0.51676182 |
| chr7 | 26404648 | 26497881 | 93234  | 3  | 4 | 1 | 0.30102999 | 0.02438896 | 3 | 3 | 0.10122019 | 0.51676182 |
| chr7 | 26497881 | 26574723 | 76843  | 2  | 4 | 1 | 0.18734596 | 0.01091641 | 4 | 4 | 0.18734596 | 0.76005302 |
| chr7 | 26574723 | 26708215 | 133493 | 4  | 4 | 2 | 0.18734596 | 0.0429175  | 4 | 4 | 0.18734596 | 0.47744371 |
| chr7 | 26708215 | 26765127 | 56913  | 2  | 4 | 2 | 0.18734596 | 0.0216246  |   |   |            |            |

|      |          |          |        |   |   |   |            |            |   |   |            |            |
|------|----------|----------|--------|---|---|---|------------|------------|---|---|------------|------------|
| chr7 | 29394282 | 29519922 | 125641 | 3 | 4 | 4 | 0.30102999 | 0.18734596 | 3 | 4 | 0.10122019 | 0.18734596 |
| chr7 | 29519922 | 29552759 | 32838  | 2 | 4 | 4 | 0.18734596 | 0.18734596 | 4 | 4 | 0.18734596 | 0.18734596 |
| chr7 | 29552759 | 29800160 | 247402 | 6 | 3 | 4 | 0.10122019 | 0.18734596 | 4 | 4 | 0.30102999 | 0.18734596 |
| chr7 | 29800160 | 29800219 | 60     | 1 | 4 | 4 | 0.11390336 | 0.18734596 | 5 | 4 | 0.30102999 | 0.18734596 |
| chr7 | 29800219 | 29959824 | 159606 | 3 | 3 | 4 | 0.10122019 | 0.18734596 | 4 | 4 | 0.30102999 | 0.18734596 |
| chr7 | 29959824 | 29959878 | 55     | 1 | 5 | 4 | 0.19510895 | 0.18734596 | 5 | 4 | 0.19510895 | 0.18734596 |
| chr7 | 29959878 | 30013689 | 53812  | 1 | 3 | 4 | 0.05670724 | 0.18734596 | 5 | 4 | 0.45545077 | 0.18734596 |
| chr7 | 30013689 | 30013748 | 60     | 1 | 3 | 4 | 0.03070643 | 0.18734596 | 6 | 4 | 0.63695542 | 0.18734596 |
| chr7 | 30013748 | 30085170 | 71423  | 2 | 3 | 3 | 0.03070643 | 0.10122019 | 6 | 4 | 0.63695542 | 0.30102999 |
| chr7 | 30085170 | 30101770 | 16601  | 2 | 3 | 4 | 0.03070643 | 0.18734596 | 6 | 4 | 0.63695542 | 0.18734596 |
| chr7 | 30101770 | 30186521 | 84752  | 2 | 3 | 3 | 0.10122019 | 0.10122019 | 4 | 4 | 0.30102999 | 0.30102999 |
| chr7 | 30186521 | 30201914 | 15394  | 1 | 3 | 6 | 0.10122019 | 0.30102999 | 4 | 5 | 0.30102999 | 0.12309572 |
| chr7 | 30201914 | 30263143 | 61230  | 1 | 3 | 6 | 0.30102999 | 0.30102999 | 2 | 5 | 0.08289318 | 0.12309572 |
| chr7 | 30263143 | 30341627 | 78485  | 2 | 3 | 3 | 0.30102999 | 0.10122019 | 2 | 4 | 0.08289318 | 0.30102999 |
| chr7 | 30341627 | 30341686 | 60     | 1 | 3 | 4 | 0.17593012 | 0.18734596 | 3 | 4 | 0.17593012 | 0.18734596 |
| chr7 | 30341686 | 30410392 | 68707  | 2 | 3 | 3 | 0.30102999 | 0.10122019 | 2 | 4 | 0.08289318 | 0.30102999 |
| chr7 | 30410392 | 30410451 | 60     | 1 | 4 | 3 | 0.47744371 | 0.10122019 | 2 | 4 | 0.0429175  | 0.30102999 |
| chr7 | 30410451 | 30497755 | 87305  | 2 | 3 | 3 | 0.30102999 | 0.10122019 | 2 | 4 | 0.08289318 | 0.30102999 |
| chr7 | 30497755 | 30497814 | 60     | 1 | 3 | 4 | 0.30102999 | 0.11390336 | 5 | 2 | 0.08289318 | 0.30102999 |
| chr7 | 30497814 | 30592023 | 92460  | 2 | 3 | 3 | 0.30102999 | 0.17593012 | 2 | 3 | 0.08289318 | 0.17593012 |
| chr7 | 30592023 | 30649261 | 58989  | 1 | 3 | 2 | 0.30102999 | 0.08289318 | 2 | 3 | 0.08289318 | 0.30102999 |
| chr7 | 30649261 | 30649320 | 60     | 1 | 3 | 2 | 0.30102999 | 0.05670724 | 2 | 2 | 0.08289318 | 0.45545077 |
| chr7 | 30649320 | 30739193 | 89874  | 2 | 3 | 2 | 0.30102999 | 0.02162467 | 2 | 5 | 0.08289318 | 0.68214471 |
| chr7 | 30739193 | 30795638 | 56446  | 2 | 3 | 3 | 0.30102999 | 0.05670724 | 2 | 5 | 0.08289318 | 0.45545077 |
| chr7 | 30795638 | 31019110 | 223473 | 6 | 2 | 4 | 0.30102999 | 0.11390336 | 5 | 5 | 0.08289318 | 0.30102999 |
| chr7 | 31019110 | 31019168 | 59     | 1 | 3 | 4 | 0.30102999 | 0.06713722 | 2 | 6 | 0.08289318 | 0.44141547 |
| chr7 | 31019168 | 31102323 | 83156  | 1 | 3 | 3 | 0.30102999 | 0.03070643 | 2 | 6 | 0.08289318 | 0.63695542 |
| chr7 | 31102323 | 31242136 | 139814 | 4 | 3 | 3 | 0.30102999 | 0.05670724 | 2 | 5 | 0.08289318 | 0.45545077 |
| chr7 | 31242136 | 31379833 | 137988 | 2 | 3 | 3 | 0.30102999 | 0.03070643 | 2 | 6 | 0.08289318 | 0.63695542 |
| chr7 | 31379833 | 31379892 | 60     | 1 | 3 | 3 | 0.17593012 | 0.01598258 | 3 | 7 | 0.17593012 | 0.84395715 |
| chr7 | 31379892 | 31469156 | 89265  | 1 | 3 | 3 | 0.30102999 | 0.01598258 | 2 | 7 | 0.08289318 | 0.84395715 |
| chr7 | 31469156 | 31558457 | 89302  | 2 | 3 | 4 | 0.30102999 | 0.02074938 | 8 | 8 | 0.08289318 | 0.79906872 |
| chr7 | 31558457 | 31558516 | 60     | 1 | 3 | 4 | 0.17593012 | 0.02074938 | 3 | 8 | 0.17593012 | 0.79906872 |
| chr7 | 31558516 | 31623936 | 65421  | 2 | 2 | 4 | 0.1575501  | 0.02074938 | 2 | 8 | 0.1575501  | 0.79906872 |
| chr7 | 31623936 | 31623995 | 60     | 1 | 4 | 4 | 0.30102999 | 0.02074938 | 3 | 8 | 0.10122019 | 0.79906872 |
| chr7 | 31623995 | 31731788 | 107794 | 3 | 3 | 4 | 0.17593012 | 0.06713722 | 3 | 6 | 0.17593012 | 0.44141547 |
| chr7 | 31731788 | 32010412 | 278625 | 6 | 3 | 3 | 0.17593012 | 0.05670724 | 3 | 5 | 0.17593012 | 0.45545077 |
| chr7 | 32010412 | 32010471 | 60     | 1 | 4 | 3 | 0.30102999 | 0.05670724 | 3 | 5 | 0.10122019 | 0.45545077 |
| chr7 | 32010471 | 32044755 | 34285  | 1 | 3 | 2 | 0.17593012 | 0.02162467 | 5 | 5 | 0.17593012 | 0.68214471 |
| chr7 | 32044755 | 32113218 | 68464  | 1 | 3 | 2 | 0.17593012 | 0.0429175  | 3 | 4 | 0.17593012 | 0.47744371 |
| chr7 | 32113218 | 32371664 | 258447 | 7 | 3 | 3 | 0.17593012 | 0.10122019 | 3 | 4 | 0.17593012 | 0.30102999 |
| chr7 | 32371664 | 32527322 | 155659 | 3 | 2 | 3 | 0.17593012 | 0.08289318 | 3 | 3 | 0.17593012 | 0.30102999 |
| chr7 | 32527322 | 32527381 | 60     | 1 | 3 | 3 | 0.17593012 | 0.10122019 | 3 | 4 | 0.17593012 | 0.30102999 |
| chr7 | 32527381 | 32598515 | 71135  | 1 | 2 | 2 | 0.17593012 | 0.08289318 | 3 | 3 | 0.17593012 | 0.30102999 |
| chr7 | 32598515 | 32598574 | 60     | 1 | 3 | 2 | 0.10122019 | 0.08289318 | 4 | 3 | 0.30102999 | 0.30102999 |
| chr7 | 32598574 | 32651634 | 53061  | 1 | 2 | 2 | 0.0429175  | 0.08289318 | 4 | 3 | 0.10122019 | 0.30102999 |
| chr7 | 32651634 | 32651693 | 60     | 1 | 2 | 2 | 0.02162467 | 0.0429175  | 5 | 4 | 0.68214471 | 0.47744371 |
| chr7 | 32651693 | 32700095 | 48403  | 2 | 2 | 2 | 0.02162467 | 0.08289318 | 5 | 3 | 0.10122019 | 0.30102999 |
| chr7 | 32700095 | 32766307 | 66213  | 1 | 2 | 1 | 0.02162467 | 0.02438896 | 5 | 3 | 0.68214471 | 0.51676182 |
| chr7 | 32766307 | 32837184 | 70878  | 4 | 3 | 1 | 0.05670724 | 0.02438896 | 5 | 3 | 0.45545077 | 0.51676182 |
| chr7 | 32837184 | 32919238 | 82055  | 2 | 2 | 1 | 0.02162467 | 0.02438896 | 5 | 3 | 0.68214471 | 0.51676182 |
| chr7 | 32919238 | 32945415 | 26178  | 1 | 2 | 0 | 0.02162467 | 0.02438896 | 0 | 5 | 0.68214471 | 0.93173516 |
| chr7 | 32945415 | 32997734 | 52320  | 1 | 2 | 0 | 0.0429175  | 0.02438896 | 0 | 4 | 0.93173516 | 0.93173516 |
| chr7 | 32997734 | 33074691 | 76958  | 1 | 2 | 0 | 0.02438896 | 0.02438896 | 3 | 3 | 0.51676182 | 0.93173516 |
| chr7 | 33074691 | 33098391 | 23701  | 2 | 1 | 1 | 0.01091641 | 0.02438896 | 4 | 3 | 0.76005302 | 0.51676182 |
| chr7 | 33098391 | 33422141 | 323751 | 7 | 1 | 1 | 0.02438896 | 0.02438896 | 3 | 3 | 0.51676182 | 0.51676182 |
| chr7 | 33422141 | 33527096 | 104956 | 3 | 1 | 1 | 0.02438896 | 0.00478973 | 3 | 5 | 0.51676182 | 1.02643191 |
| chr7 | 33527096 | 33707412 | 180317 | 4 | 0 | 0 | 0.02438896 | 0.02438896 | 3 | 5 | 0.51676182 | 1.60515106 |
| chr7 | 33707412 | 33766232 | 58821  | 2 | 3 | 3 | 0.02438896 | 0.05670724 | 3 | 5 | 0.51676182 | 0.45545077 |
| chr7 | 33766232 | 34058830 | 292599 | 6 | 1 | 2 | 0.02438896 | 0.02162467 | 3 | 5 | 0.51676182 | 0.68214471 |
| chr7 | 34058830 | 34101615 | 42786  | 2 | 1 | 3 | 0.02438896 | 0.05670724 | 3 | 5 | 0.51676182 | 0.45545077 |
| chr7 | 34101615 | 34194602 | 92988  | 3 | 1 | 4 | 0.01091641 | 0.11390336 | 4 | 5 | 0.76005302 | 0.30102999 |
| chr7 | 34194602 | 34296783 | 102182 | 1 | 4 | 4 | 0.02438896 | 0.11390336 | 3 | 5 | 0.51676182 | 0.30102999 |
| chr7 | 34296783 | 34296842 | 60     | 1 | 1 | 5 | 0.02438896 | 0.19510895 | 5 | 5 | 0.51676182 | 0.19510895 |
| chr7 | 34296842 | 34460336 | 163495 | 6 | 1 | 3 | 0.02438896 | 0.05670724 | 3 | 5 | 0.51676182 | 0.45545077 |
| chr7 | 34460336 | 34640648 | 180313 | 3 | 1 | 3 | 0.02438896 | 0.03070643 | 3 | 6 | 0.51676182 | 0.63695542 |
| chr7 | 34640648 | 34795835 | 155188 | 1 | 1 | 2 | 0.02438896 | 0.01053319 | 3 | 3 | 0.51676182 | 0.91219088 |
| chr7 | 34795835 | 34795894 | 60     | 1 | 1 | 4 | 0.01091641 | 0.06713722 | 4 | 4 | 0.76005302 | 0.44141547 |
| chr7 | 34795894 | 34937566 | 141673 | 3 | 3 | 3 | 0.02438896 | 0.06713722 | 3 | 6 | 0.51676182 | 0.44141547 |
| chr7 | 34937566 | 34993875 | 56310  | 3 | 1 | 4 | 0.02438896 | 0.03812622 | 3 | 7 | 0.51676182 | 0.60763643 |
| chr7 | 34993875 | 35034997 | 41123  | 1 | 3 | 3 | 0.05404976 | 0.01598258 | 2 | 7 | 0.30102999 | 0.84395715 |
| chr7 | 35034997 | 35077993 | 42997  | 1 | 2 | 2 | 0.05404976 | 0.01053319 | 2 | 6 | 0.30102999 | 0.91219088 |
| chr7 | 35077993 | 35078052 | 60     | 1 | 1 | 2 | 0.01091641 | 0.01053319 | 4 | 6 | 0.76005302 | 0.91219088 |
| chr7 | 35078052 | 35288201 | 210150 | 1 | 1 | 1 | 0.02438896 | 0.00204627 | 3 | 6 | 0.51676182 | 1.31360226 |
| chr7 | 35288201 | 35290583 | 2383   | 2 | 1 | 1 | 0.01091641 | 0.00204627 | 4 | 6 | 0.76005302 | 1.31360226 |
| chr7 | 35290583 | 35367246 | 76664  | 1 | 1 | 1 | 0.02438896 | 0.00204627 | 6 | 6 | 0.51676182 | 1.31360226 |
| chr7 | 35367246 | 35367305 | 60     | 1 | 1 | 1 | 0.01091641 | 0.00204627 | 4 | 6 | 0.76005302 | 1.31360226 |
| chr7 | 35367305 | 35524603 | 157299 | 1 | 1 | 1 | 0.02438896 | 0.00478973 | 5 | 5 | 0.51676182 | 1.02643191 |
| chr7 | 35524603 | 35524662 | 60     | 1 | 1 | 1 | 0.00478973 | 0.00478973 | 5 | 5 | 1.02643191 | 1.02643191 |
| chr7 | 35524662 | 35677930 | 153269 | 1 | 1 | 1 | 0.01091641 | 0.00478973 | 4 | 5 | 0.76005302 | 1.02643191 |
| chr7 | 35677930 | 35791206 | 113277 | 3 | 1 | 3 | 0.01091641 | 0.03070643 | 4 | 6 | 0.76005302 | 0.63695542 |
| chr7 | 35791206 | 35849355 | 58150  | 2 | 1 | 4 | 0.00478973 | 0.06713722 | 5 | 6 | 1.02643191 | 0.44141547 |
| chr7 | 35849355 | 35920325 | 70971  | 1 | 0 | 4 | 0          | 0.11390336 | 5 | 5 | 1.60515106 | 0.30102999 |
| chr7 | 35920325 | 36142309 | 221985 | 3 | 0 | 4 | 0          | 0.11390336 | 4 | 5 | 1.2672838  | 0.30102999 |
| chr7 | 36142309 | 36209446 | 67138  | 2 | 0 | 4 | 0          | 0.11390336 | 5 | 5 | 1.60515106 | 0.30102999 |
| chr7 | 36209446 | 36209505 | 60     | 1 | 0 | 4 | 0          | 0.06713722 | 6 | 5 | 1.60515106 | 0.44141547 |
| chr7 | 36209505 | 36301255 | 91751  | 2 | 0 | 4 | 0          | 0.11390336 | 4 | 6 | 1.2672838  | 0.30102999 |
| chr7 | 36301255 | 36447347 | 146093 | 4 | 1 | 4 | 0.00478973 | 0.06713722 | 5 | 6 | 1.02643191 | 0.44141547 |
| chr7 | 36447347 | 36547449 | 100103 | 4 | 2 | 4 | 0.02162467 | 0.06713722 | 5 | 6 | 0.68214471 | 0.44141547 |
| chr7 | 36547449 | 36713598 | 166150 | 5 | 2 | 4 | 0.01053319 | 0.06713722 | 6 | 6 | 0.91219088 | 0.44141547 |
| chr7 | 367135   |          |        |   |   |   |            |            |   |   |            |            |

|      |          |          |        |   |   |   |            |            |   |   |            |            |
|------|----------|----------|--------|---|---|---|------------|------------|---|---|------------|------------|
| chr7 | 40379983 | 40680672 | 300690 | 8 | 2 | 0 | 0.02162467 | 0          | 5 | 3 | 0.68214471 | 0.93173516 |
| chr7 | 40680672 | 40789006 | 108335 | 2 | 2 | 0 | 0.02162467 | 0          | 5 | 2 | 0.68214471 | 0.61140001 |
| chr7 | 40789006 | 40817945 | 28940  | 2 | 0 | 0 | 0.01053319 | 0          | 6 | 3 | 0.91219088 | 0.93173516 |
| chr7 | 40817945 | 40917509 | 99565  | 3 | 2 | 0 | 0.02162467 | 0          | 5 | 3 | 0.68214471 | 0.93173516 |
| chr7 | 40917509 | 40917568 | 60     | 1 | 2 | 0 | 0.01053319 | 0          | 6 | 3 | 0.91219088 | 0.93173516 |
| chr7 | 40917568 | 41084640 | 167073 | 1 | 2 | 0 | 0.02162467 | 0          | 5 | 3 | 0.68214471 | 0.93173516 |
| chr7 | 41084640 | 41280084 | 195445 | 1 | 1 | 0 | 0.05404976 | 0          | 2 | 3 | 0.30102999 | 0.93173516 |
| chr7 | 41280084 | 41280143 | 60     | 1 | 2 | 0 | 0.05404976 | 0.08289318 | 2 | 3 | 0.30102999 | 0.30102999 |
| chr7 | 41280143 | 41546705 | 266563 | 1 | 2 | 0 | 0.1218695  | 0.08289318 | 1 | 3 | 0.1218695  | 0.30102999 |
| chr7 | 41546705 | 41750898 | 204194 | 3 | 0 | 0 | 0          | 0.08289318 | 1 | 3 | 0.30102999 | 0.30102999 |
| chr7 | 41750898 | 41915483 | 164586 | 1 | 0 | 1 | 0          | 0.02438896 | 1 | 3 | 0.30102999 | 0.51676182 |
| chr7 | 41915483 | 42003745 | 88263  | 1 | 0 | 0 | 0          | 0          | 1 | 3 | 0.30102999 | 0.93173516 |
| chr7 | 42003745 | 42079615 | 75871  | 2 | 0 | 1 | 0          | 0.02438896 | 1 | 3 | 0.30102999 | 0.51676182 |
| chr7 | 42079615 | 42079670 | 56     | 1 | 1 | 3 | 0.05404976 | 0.05670724 | 2 | 5 | 0.30102999 | 0.45545077 |
| chr7 | 42079670 | 42116391 | 36722  | 1 | 0 | 1 | 0          | 0.01091641 | 2 | 4 | 0.61140001 | 0.76005302 |
| chr7 | 42116391 | 42188032 | 71642  | 1 | 0 | 1 | 0          | 0.02438896 | 1 | 3 | 0.61140001 | 0.51676182 |
| chr7 | 42188032 | 42262821 | 74790  | 2 | 1 | 3 | 0.05404976 | 0.10122019 | 2 | 4 | 0.30102999 | 0.30102999 |
| chr7 | 42262821 | 42441843 | 179023 | 2 | 0 | 1 | 0          | 0.01091641 | 2 | 4 | 0.61140001 | 0.76005302 |
| chr7 | 42441843 | 42664387 | 222545 | 2 | 1 | 5 | 0.05404976 | 0.19510895 | 5 | 5 | 0.30102999 | 0.19510895 |
| chr7 | 42664387 | 42664446 | 60     | 1 | 2 | 5 | 0.1575501  | 0.19510895 | 2 | 5 | 0.1575501  | 0.19510895 |
| chr7 | 42664446 | 42807357 | 142922 | 1 | 4 | 4 | 0.1575501  | 0.13390336 | 2 | 5 | 0.1575501  | 0.30102999 |
| chr7 | 42807357 | 42944511 | 137145 | 2 | 2 | 4 | 0.1575501  | 0.06713722 | 2 | 6 | 0.1575501  | 0.44141547 |
| chr7 | 42944511 | 42949108 | 4598   | 2 | 2 | 5 | 0.1575501  | 0.07511598 | 2 | 7 | 0.1575501  | 0.43181735 |
| chr7 | 42949108 | 42974342 | 25235  | 3 | 2 | 6 | 0.1575501  | 0.129913   | 2 | 7 | 0.1575501  | 0.30102999 |
| chr7 | 42974342 | 43070435 | 96094  | 1 | 2 | 4 | 0.1575501  | 0.03812622 | 2 | 7 | 0.1575501  | 0.60763643 |
| chr7 | 43070435 | 43139655 | 69221  | 1 | 2 | 3 | 0.1575501  | 0.01598258 | 2 | 7 | 0.1575501  | 0.84395715 |
| chr7 | 43139655 | 43139714 | 60     | 1 | 2 | 3 | 0.08289318 | 0.01598258 | 3 | 7 | 0.30102999 | 0.84395715 |
| chr7 | 43139714 | 43160630 | 20917  | 2 | 2 | 2 | 0.08289318 | 0.00493743 | 3 | 7 | 0.30102999 | 1.16581773 |
| chr7 | 43160630 | 43267465 | 106836 | 2 | 2 | 2 | 0.08289318 | 0.01053319 | 3 | 6 | 0.30102999 | 0.91219088 |
| chr7 | 43267465 | 43399629 | 132165 | 4 | 3 | 2 | 0.17593012 | 0.01053319 | 3 | 6 | 0.17593012 | 0.91219088 |
| chr7 | 43399629 | 43399688 | 60     | 1 | 3 | 3 | 0.17593012 | 0.01598258 | 3 | 7 | 0.17593012 | 0.84395715 |
| chr7 | 43399688 | 43483743 | 84056  | 2 | 2 | 2 | 0.17593012 | 0.00493743 | 3 | 7 | 0.17593012 | 1.16581773 |
| chr7 | 43483743 | 43613764 | 130022 | 3 | 2 | 2 | 0.08289318 | 0.00493743 | 7 | 7 | 0.30102999 | 1.16581773 |
| chr7 | 43613764 | 43613823 | 60     | 1 | 3 | 2 | 0.10122019 | 0.00493743 | 4 | 7 | 0.30102999 | 1.16581773 |
| chr7 | 43613823 | 43631207 | 17326  | 1 | 3 | 2 | 0.10122019 | 0.01053319 | 4 | 6 | 0.30102999 | 0.91219088 |
| chr7 | 43631207 | 43721565 | 90359  | 3 | 2 | 2 | 0.05670724 | 0.01053319 | 5 | 6 | 0.45545077 | 0.63695542 |
| chr7 | 43721565 | 43844311 | 122747 | 3 | 3 | 1 | 0.05670724 | 0.00204627 | 5 | 6 | 0.45545077 | 1.31360226 |
| chr7 | 43844311 | 43844370 | 60     | 1 | 3 | 1 | 0.03070643 | 0.00204627 | 6 | 6 | 0.63695542 | 1.31360226 |
| chr7 | 43844370 | 43906135 | 61766  | 1 | 3 | 1 | 0.10122019 | 0.00204627 | 4 | 6 | 0.30102999 | 1.31360226 |
| chr7 | 43906135 | 43945453 | 39919  | 4 | 3 | 3 | 0.10122019 | 0.03070643 | 4 | 6 | 0.30102999 | 0.63695542 |
| chr7 | 43945453 | 43945512 | 60     | 1 | 3 | 3 | 0.03070643 | 0.03070643 | 6 | 6 | 0.63695542 | 0.63695542 |
| chr7 | 43945512 | 44085092 | 139581 | 2 | 2 | 2 | 0.05670724 | 0.01053319 | 5 | 6 | 0.45545077 | 0.91219088 |
| chr7 | 44085092 | 44103691 | 18600  | 2 | 2 | 2 | 0.03070643 | 0.01053319 | 6 | 6 | 0.63695542 | 0.91219088 |
| chr7 | 44103691 | 44123435 | 19745  | 4 | 3 | 4 | 0.03070643 | 0.06713722 | 6 | 6 | 0.63695542 | 0.44141547 |
| chr7 | 44123435 | 44146194 | 22760  | 1 | 3 | 3 | 0.03070643 | 0.03070643 | 6 | 6 | 0.63695542 | 0.63695542 |
| chr7 | 44146194 | 44158547 | 12354  | 1 | 3 | 2 | 0.03070643 | 0.01053319 | 6 | 6 | 0.63695542 | 0.91219088 |
| chr7 | 44158547 | 44179545 | 20999  | 4 | 3 | 1 | 0.03070643 | 0.00204627 | 6 | 6 | 0.63695542 | 1.31360226 |
| chr7 | 44179545 | 44179591 | 47     | 1 | 3 | 3 | 0.03070643 | 0.03070643 | 6 | 6 | 0.63695542 | 0.63695542 |
| chr7 | 44179591 | 44220292 | 40702  | 1 | 3 | 1 | 0.03070643 | 0.00204627 | 6 | 6 | 0.63695542 | 1.31360226 |
| chr7 | 44220292 | 44243081 | 22790  | 2 | 3 | 1 | 0.03070643 | 8.47E-04   | 7 | 7 | 0.63695542 | 1.62048027 |
| chr7 | 44243081 | 44243140 | 60     | 1 | 3 | 3 | 0.03070643 | 0.01598258 | 6 | 7 | 0.63695542 | 0.84395715 |
| chr7 | 44243140 | 44359362 | 116223 | 3 | 3 | 1 | 0.03070643 | 8.47E-04   | 7 | 7 | 0.63695542 | 1.62048027 |
| chr7 | 44359362 | 44423686 | 64325  | 2 | 3 | 1 | 0.05670724 | 8.47E-04   | 5 | 7 | 0.45545077 | 1.62048027 |
| chr7 | 44423686 | 44501992 | 78307  | 3 | 1 | 1 | 0.05670724 | 0.00204627 | 5 | 6 | 0.45545077 | 1.31360226 |
| chr7 | 44501992 | 44530729 | 28738  | 2 | 3 | 2 | 0.03070643 | 0.00204627 | 6 | 6 | 0.63695542 | 1.31360226 |
| chr7 | 44530729 | 44572817 | 42089  | 1 | 3 | 1 | 0.05670724 | 0.00204627 | 5 | 6 | 0.45545077 | 1.31360226 |
| chr7 | 44572817 | 44618716 | 45900  | 3 | 2 | 2 | 0.05670724 | 0.01053319 | 5 | 6 | 0.45545077 | 0.91219088 |
| chr7 | 44618716 | 44646934 | 28219  | 4 | 3 | 2 | 0.03070643 | 0.01053319 | 6 | 6 | 0.63695542 | 0.91219088 |
| chr7 | 44646934 | 44748537 | 101604 | 3 | 3 | 1 | 0.03070643 | 0.00204627 | 6 | 6 | 0.63695542 | 1.31360226 |
| chr7 | 44748537 | 44787686 | 39150  | 2 | 3 | 1 | 0.03070643 | 8.47E-04   | 6 | 7 | 0.63695542 | 1.62048027 |
| chr7 | 44787686 | 44837459 | 49774  | 1 | 3 | 1 | 0.05670724 | 8.47E-04   | 5 | 7 | 0.45545077 | 1.62048027 |
| chr7 | 44837459 | 44886899 | 49441  | 2 | 3 | 1 | 0.10122019 | 8.47E-04   | 4 | 7 | 0.30102999 | 1.62048027 |
| chr7 | 44886899 | 44924081 | 37183  | 1 | 3 | 1 | 0.10122019 | 0.00204627 | 4 | 6 | 0.30102999 | 1.31360226 |
| chr7 | 44924081 | 44995529 | 75449  | 3 | 1 | 2 | 0.05670724 | 0.00204627 | 5 | 6 | 0.45545077 | 1.31360226 |
| chr7 | 44995529 | 45103560 | 104032 | 2 | 2 | 2 | 0.05670724 | 0.01053319 | 3 | 6 | 0.45545077 | 0.91219088 |
| chr7 | 45103560 | 45145939 | 42370  | 1 | 2 | 2 | 0.02162467 | 0.01053319 | 5 | 5 | 0.68214471 | 0.91219088 |
| chr7 | 45145939 | 45179106 | 33178  | 1 | 2 | 2 | 0.0429175  | 0.01053319 | 4 | 6 | 0.47744371 | 0.91219088 |
| chr7 | 45179106 | 45179165 | 60     | 1 | 4 | 2 | 0.0429175  | 0.03070643 | 4 | 4 | 0.47744371 | 0.63695542 |
| chr7 | 45179165 | 45223788 | 44624  | 1 | 2 | 3 | 0.08289318 | 0.03070643 | 3 | 6 | 0.30102999 | 0.63695542 |
| chr7 | 45223788 | 45285096 | 61309  | 2 | 3 | 2 | 0.08289318 | 0.01598258 | 3 | 7 | 0.30102999 | 0.84395715 |
| chr7 | 45285096 | 45482804 | 197709 | 1 | 2 | 2 | 0.08289318 | 0.02162467 | 3 | 5 | 0.30102999 | 0.68214471 |
| chr7 | 45482804 | 45618484 | 135681 | 2 | 2 | 2 | 0.0429175  | 0.02162467 | 4 | 5 | 0.47744371 | 0.68214471 |
| chr7 | 45618484 | 45618543 | 60     | 1 | 2 | 3 | 0.0429175  | 0.05670724 | 4 | 5 | 0.47744371 | 0.45545077 |
| chr7 | 45618543 | 45680560 | 62018  | 1 | 0 | 2 | 0          | 0.02162467 | 1 | 5 | 0.30102999 | 0.68214471 |
| chr7 | 45680560 | 45724596 | 44037  | 2 | 0 | 2 | 0.01053319 | 0.01053319 | 1 | 6 | 0.30102999 | 0.91219088 |
| chr7 | 45724596 | 45789334 | 64739  | 4 | 0 | 4 | 0.06713722 | 0.01053319 | 1 | 6 | 0.30102999 | 0.44141547 |
| chr7 | 45789334 | 45929080 | 139747 | 1 | 0 | 3 | 0.03070643 | 0.01053319 | 1 | 6 | 0.30102999 | 0.63695542 |
| chr7 | 45929080 | 45953318 | 24239  | 2 | 0 | 4 | 0.06713722 | 0.01053319 | 1 | 6 | 0.30102999 | 0.44141547 |
| chr7 | 45953318 | 46028055 | 74738  | 1 | 0 | 3 | 0          | 0.05670724 | 1 | 5 | 0.30102999 | 0.45545077 |
| chr7 | 46028055 | 46256488 | 228434 | 1 | 0 | 0 | 0          | 0          | 0 | 0 | 1.26272838 | 0          |
| chr7 | 46256488 | 46392037 | 135550 | 1 | 0 | 0 | 0          | 0          | 0 | 3 | 0          | 0.93173516 |
| chr7 | 46392037 | 46392096 | 60     | 1 | 0 | 1 | 0          | 0.01091641 | 2 | 4 | 0.61140001 | 0.76005302 |
| chr7 | 46392096 | 46557430 | 165335 | 1 | 0 | 0 | 0          | 0          | 2 | 3 | 0.61140001 | 0.93173516 |
| chr7 | 46557430 | 46700759 | 143330 | 1 | 0 | 0 | 0          | 0          | 2 | 1 | 0.61140001 | 0.30102999 |
| chr7 | 46700759 | 46700818 | 60     | 1 | 0 | 0 | 0          | 0          | 2 | 2 | 0.61140001 | 0.61140001 |
| chr7 | 46700818 | 46889750 | 188933 | 3 | 0 | 0 | 0          | 0          | 2 | 1 | 0.61140001 | 0.30102999 |
| chr7 | 46889750 | 46889809 | 60     | 1 | 0 | 1 | 0          | 0.05404976 | 3 | 2 | 0.93173516 | 0.30102999 |
| chr7 | 46889809 | 47034481 | 144673 | 1 | 0 | 1 | 0          | 0.1218695  | 1 | 1 | 0.1218695  | 0.1218695  |
| chr7 | 47034481 | 47126917 | 92437  | 1 | 0 | 1 | 0          | 0.1218695  | 1 | 1 | 0.30102999 | 0.1218695  |
| chr7 | 47126917 | 47276534 | 149618 | 2 | 0 | 2 | 0          | 0.1575501  | 2 | 1 | 0.30102999 | 0.1575501  |
| chr7 | 47276534 | 47455744 | 179211 | 4 | 1 | 2 | 0.1218695  | 0.08289318 | 1 | 3 | 0.1218695  | 0.30102999 |
| chr7 | 47455744 | 47455803 | 60     | 1 | 3 | 3 | 0.05404976 | 0.17593012 | 2 | 3 | 0.30102999 | 0.17593012 |
| chr7 | 47455803 | 47533605 | 77     |   |   |   |            |            |   |   |            |            |

|      |          |          |        |    |   |   |            |            |   |   |            |            |
|------|----------|----------|--------|----|---|---|------------|------------|---|---|------------|------------|
| chr7 | 52068122 | 52182150 | 114029 | 1  | 0 | 2 | 0          | 0.02162467 | 0 | 5 | 0          | 0.68214471 |
| chr7 | 52182150 | 52182209 | 60     | 1  | 1 | 2 | 0.30102999 | 0.02162467 | 0 | 5 | 0          | 0.68214471 |
| chr7 | 52182209 | 52317316 | 135108 | 1  | 0 | 1 | 0          | 0.01091641 | 0 | 4 | 0          | 0.76005302 |
| chr7 | 52317316 | 52793551 | 476236 | 3  | 0 | 1 | 0          | 0.05404976 | 0 | 2 | 0          | 0.30102999 |
| chr7 | 52793551 | 52957325 | 163775 | 2  | 0 | 2 | 0          | 0.0429175  | 0 | 4 | 0          | 0.47744371 |
| chr7 | 52957325 | 53180432 | 223108 | 3  | 0 | 2 | 0          | 0.0429175  | 1 | 4 | 0.30102999 | 0.47744371 |
| chr7 | 53180432 | 53605427 | 424996 | 3  | 0 | 1 | 0          | 0.05404976 | 1 | 2 | 0.30102999 | 0.30102999 |
| chr7 | 53605427 | 53605486 | 60     | 1  | 0 | 1 | 0          | 0.02438896 | 1 | 3 | 0.30102999 | 0.51676182 |
| chr7 | 53605486 | 53724423 | 118938 | 1  | 0 | 0 | 0          | 0          | 1 | 3 | 0.30102999 | 0.93173516 |
| chr7 | 53724423 | 53724482 | 60     | 1  | 0 | 0 | 0          | 0          | 2 | 4 | 0.61140001 | 1.26272838 |
| chr7 | 53724482 | 53825056 | 100575 | 2  | 0 | 0 | 0          | 0          | 2 | 3 | 0.61140001 | 0.93173516 |
| chr7 | 53825056 | 54412818 | 587763 | 6  | 1 | 1 | 0.05404976 | 0.02438896 | 2 | 3 | 0.30102999 | 0.51676182 |
| chr7 | 54412818 | 54412877 | 60     | 1  | 2 | 1 | 0.1575501  | 0.02438896 | 2 | 3 | 0.1575501  | 0.51676182 |
| chr7 | 54412877 | 54604609 | 191733 | 2  | 1 | 1 | 0.05404976 | 0.02438896 | 2 | 3 | 0.30102999 | 0.51676182 |
| chr7 | 54604609 | 54823177 | 218569 | 6  | 1 | 1 | 0.05404976 | 0.01091641 | 2 | 4 | 0.30102999 | 0.76005302 |
| chr7 | 54823177 | 54924763 | 101587 | 2  | 2 | 1 | 0.1575501  | 0.01091641 | 2 | 4 | 0.1575501  | 0.76005302 |
| chr7 | 54924763 | 54971953 | 47191  | 2  | 2 | 1 | 0.0429175  | 0.01091641 | 2 | 4 | 0.47744371 | 0.76005302 |
| chr7 | 54971953 | 55147087 | 175135 | 2  | 1 | 1 | 0.08289318 | 0.01091641 | 3 | 4 | 0.30102999 | 0.76005302 |
| chr7 | 55147087 | 55446925 | 299839 | 6  | 2 | 1 | 0.0429175  | 0.01091641 | 4 | 4 | 0.47744371 | 0.76005302 |
| chr7 | 55446925 | 55669321 | 122397 | 3  | 2 | 1 | 0.08289318 | 0.01091641 | 3 | 4 | 0.30102999 | 0.76005302 |
| chr7 | 55669321 | 55693800 | 60     | 1  | 0 | 1 | 0.0429175  | 0.01091641 | 4 | 4 | 0.47744371 | 0.76005302 |
| chr7 | 55693800 | 55693809 | 68650  | 2  | 2 | 1 | 0.08289318 | 0.01091641 | 4 | 4 | 0.30102999 | 0.76005302 |
| chr7 | 55693809 | 55638088 | 60     | 1  | 2 | 1 | 0.0429175  | 0.01091641 | 4 | 4 | 0.47744371 | 0.76005302 |
| chr7 | 55638088 | 56082888 | 444801 | 10 | 2 | 1 | 0.08289318 | 0.02438896 | 3 | 3 | 0.30102999 | 0.51676182 |
| chr7 | 56082888 | 56147677 | 64790  | 2  | 1 | 1 | 0.02438896 | 0.02438896 | 3 | 3 | 0.51676182 | 0.51676182 |
| chr7 | 56147677 | 56169989 | 223113 | 3  | 1 | 2 | 0.02438896 | 0.08289318 | 3 | 3 | 0.51676182 | 0.30102999 |
| chr7 | 56169989 | 56267361 | 937373 | 1  | 1 | 0 | 0.02438896 | 0          | 3 | 3 | 0.51676182 | 0.93173516 |
| chr7 | 56267361 | 56566840 | 299480 | 1  | 1 | 0 | 0.05404976 | 0          | 2 | 3 | 0.30102999 | 0.93173516 |
| chr7 | 56566840 | 56566899 | 60     | 1  | 1 | 1 | 0.05404976 | 0.02438896 | 2 | 3 | 0.30102999 | 0.51676182 |
| chr7 | 56566899 | 56786860 | 219962 | 2  | 1 | 1 | 0.05404976 | 0.05404976 | 2 | 2 | 0.30102999 | 0.30102999 |
| chr7 | 56786860 | 5696079  | 209220 | 1  | 0 | 0 | 0          | 0          | 0 | 1 | 0          | 0.30102999 |
| chr7 | 62833583 | 63108972 | 275390 | 2  | 0 | 0 | 0          | 0          | 1 | 0 | 0          | 0.30102999 |
| chr7 | 63108972 | 63374309 | 265338 | 2  | 3 | 0 | 0.17593012 | 0          | 3 | 1 | 0.17593012 | 0.30102999 |
| chr7 | 63374309 | 63374368 | 60     | 1  | 4 | 0 | 0.18734596 | 0          | 4 | 1 | 0.18734596 | 0.30102999 |
| chr7 | 63374368 | 63494989 | 120622 | 2  | 3 | 0 | 0.10122019 | 0          | 4 | 1 | 0.30102999 | 0.30102999 |
| chr7 | 63494989 | 63919428 | 424440 | 7  | 2 | 0 | 0.08289318 | 0          | 3 | 1 | 0.30102999 | 0.30102999 |
| chr7 | 63919428 | 63919487 | 60     | 1  | 4 | 0 | 0.18734596 | 0          | 4 | 2 | 0.18734596 | 0.61140001 |
| chr7 | 63919487 | 64117428 | 197942 | 5  | 2 | 0 | 0.0429175  | 0          | 4 | 2 | 0.47744371 | 0.61140001 |
| chr7 | 64117428 | 64170916 | 53489  | 3  | 4 | 0 | 0.18734596 | 0          | 4 | 2 | 0.18734596 | 0.61140001 |
| chr7 | 64170916 | 64290160 | 119245 | 2  | 4 | 0 | 0.18734596 | 0          | 4 | 1 | 0.18734596 | 0.30102999 |
| chr7 | 64290160 | 64362759 | 72600  | 3  | 5 | 0 | 0.19510895 | 0          | 5 | 2 | 0.19510895 | 0.61140001 |
| chr7 | 64362759 | 64399980 | 37222  | 4  | 5 | 0 | 0.30102999 | 0          | 4 | 2 | 0.11390336 | 0.61140001 |
| chr7 | 64399980 | 64435453 | 35474  | 1  | 4 | 0 | 0.18734596 | 0          | 4 | 2 | 0.18734596 | 0.61140001 |
| chr7 | 64435453 | 64691936 | 256484 | 2  | 4 | 0 | 0.10122019 | 0          | 4 | 2 | 0.30102999 | 0.61140001 |
| chr7 | 64691936 | 64691995 | 60     | 1  | 4 | 0 | 0.18734596 | 0          | 4 | 2 | 0.18734596 | 0.61140001 |
| chr7 | 64691995 | 64754859 | 62865  | 1  | 2 | 0 | 0.08289318 | 0          | 3 | 2 | 0.30102999 | 0.61140001 |
| chr7 | 64754859 | 64786270 | 31412  | 1  | 2 | 0 | 0.08289318 | 0          | 3 | 1 | 0.30102999 | 0.30102999 |
| chr7 | 64786270 | 64866014 | 79745  | 3  | 3 | 0 | 0.17593012 | 0          | 3 | 1 | 0.17593012 | 0.30102999 |
| chr7 | 64866014 | 64927758 | 61745  | 3  | 4 | 0 | 0.11390336 | 0          | 5 | 2 | 0.30102999 | 0.61140001 |
| chr7 | 64927758 | 65070919 | 143162 | 1  | 3 | 0 | 0.10122019 | 0          | 4 | 2 | 0.30102999 | 0.61140001 |
| chr7 | 65070919 | 65217105 | 146187 | 1  | 2 | 0 | 0.0429175  | 0          | 4 | 1 | 0.47744371 | 0.30102999 |
| chr7 | 65217105 | 65217164 | 60     | 1  | 3 | 1 | 0.10122019 | 0.1218695  | 1 | 1 | 0.30102999 | 0.1218695  |
| chr7 | 65217164 | 65269867 | 52704  | 1  | 3 | 0 | 0.10122019 | 0          | 4 | 1 | 0.30102999 | 0.30102999 |
| chr7 | 65269867 | 65426422 | 156556 | 2  | 1 | 0 | 0.01091641 | 0          | 4 | 1 | 0.76005302 | 0.30102999 |
| chr7 | 65426422 | 65426481 | 60     | 1  | 3 | 0 | 0.10122019 | 0          | 4 | 1 | 0.30102999 | 0.30102999 |
| chr7 | 65426481 | 65580686 | 154206 | 3  | 3 | 0 | 0.17593012 | 0          | 3 | 1 | 0.17593012 | 0.30102999 |
| chr7 | 65580686 | 65618072 | 37387  | 2  | 3 | 0 | 0.17593012 | 0          | 3 | 2 | 0.17593012 | 0.61140001 |
| chr7 | 65618072 | 65618131 | 60     | 1  | 3 | 1 | 0.17593012 | 0.05404976 | 3 | 2 | 0.17593012 | 0.30102999 |
| chr7 | 65618131 | 65726503 | 108373 | 2  | 3 | 1 | 0.17593012 | 0.1218695  | 3 | 1 | 0.17593012 | 0.1218695  |
| chr7 | 65726503 | 65726562 | 60     | 1  | 4 | 1 | 0.30102999 | 0.05404976 | 3 | 2 | 0.10122019 | 0.30102999 |
| chr7 | 65726562 | 65782693 | 56132  | 1  | 2 | 1 | 0.08289318 | 0.05404976 | 3 | 2 | 0.30102999 | 0.30102999 |
| chr7 | 65782693 | 65886456 | 103764 | 4  | 2 | 0 | 0.08289318 | 0          | 3 | 2 | 0.30102999 | 0.61140001 |
| chr7 | 65886456 | 65972673 | 86218  | 2  | 3 | 1 | 0.08289318 | 0.05404976 | 3 | 2 | 0.30102999 | 0.30102999 |
| chr7 | 65972673 | 66246289 | 273617 | 8  | 3 | 1 | 0.17593012 | 0.05404976 | 3 | 2 | 0.17593012 | 0.30102999 |
| chr7 | 66246289 | 66246348 | 60     | 1  | 3 | 1 | 0.17593012 | 0          | 3 | 3 | 0.17593012 | 0.51676182 |
| chr7 | 66246348 | 66389043 | 142696 | 3  | 3 | 1 | 0.1575501  | 0.05404976 | 2 | 2 | 0.1575501  | 0.30102999 |
| chr7 | 66389043 | 66418437 | 29395  | 2  | 3 | 1 | 0.17593012 | 0.05404976 | 3 | 2 | 0.17593012 | 0.30102999 |
| chr7 | 66418437 | 66540178 | 121742 | 3  | 3 | 1 | 0.30102999 | 0.05404976 | 3 | 2 | 0.08289318 | 0.30102999 |
| chr7 | 66540178 | 66730616 | 190439 | 4  | 2 | 1 | 0.1575501  | 0.05404976 | 2 | 2 | 0.1575501  | 0.30102999 |
| chr7 | 66730616 | 66824455 | 93040  | 2  | 2 | 4 | 0.47744371 | 0.05404976 | 2 | 2 | 0.0429175  | 0.30102999 |
| chr7 | 66824455 | 66937687 | 113233 | 2  | 1 | 1 | 0.05404976 | 0.05404976 | 2 | 2 | 0.30102999 | 0.30102999 |
| chr7 | 66937687 | 66937746 | 60     | 1  | 1 | 1 | 0.05404976 | 0.02438896 | 3 | 3 | 0.30102999 | 0.51676182 |
| chr7 | 66937746 | 67230326 | 292581 | 1  | 1 | 1 | 0.05404976 | 0.05404976 | 2 | 2 | 0.30102999 | 0.30102999 |
| chr7 | 67230326 | 67230385 | 60     | 1  | 2 | 1 | 0.1575501  | 0.05404976 | 2 | 1 | 0.1575501  | 0.30102999 |
| chr7 | 67230385 | 67429596 | 199212 | 1  | 2 | 1 | 0.30102999 | 0.05404976 | 1 | 2 | 0.05404976 | 0.30102999 |
| chr7 | 67429596 | 67616356 | 186761 | 2  | 1 | 1 | 0.1218695  | 0.30102999 | 1 | 0 | 0.1218695  | 0          |
| chr7 | 67616356 | 68065098 | 448743 | 2  | 0 | 1 | 0          | 0.30102999 | 0 | 0 | 0          | 0          |
| chr7 | 68065098 | 68065157 | 60     | 1  | 0 | 1 | 0          | 0.30102999 | 1 | 0 | 0.30102999 | 0          |
| chr7 | 68194327 | 68363806 | 169480 | 2  | 0 | 0 | 0          | 0          | 1 | 0 | 0.30102999 | 0          |
| chr7 | 68363806 | 68564123 | 200318 | 2  | 1 | 0 | 0.05404976 | 0          | 2 | 1 | 0.30102999 | 0.30102999 |
| chr7 | 68564123 | 68694925 | 130803 | 2  | 1 | 0 | 0.01091641 | 0          | 4 | 1 | 0.76005302 | 0.30102999 |
| chr7 | 68694925 | 68953512 | 258588 | 3  | 1 | 0 | 0.02438896 | 0          | 3 | 1 | 0.51676182 | 0.30102999 |
| chr7 | 68953512 | 68953571 | 60     | 1  | 2 | 0 | 0.08289318 | 0          | 3 | 1 | 0.30102999 | 0.30102999 |
| chr7 | 68953571 | 69130237 | 176667 | 3  | 1 | 0 | 0.02438896 | 0          | 3 | 1 | 0.51676182 | 0.30102999 |
| chr7 | 69130237 | 69130296 | 60     | 1  | 1 | 0 | 0.01091641 | 0          | 4 | 1 | 0.76005302 | 0.30102999 |
| chr7 | 69130296 | 69250222 | 94727  | 2  | 1 | 0 | 0.02438896 | 0          | 3 | 1 | 0.51676182 | 0.30102999 |
| chr7 | 69250222 | 69330796 | 105775 | 2  | 2 | 0 | 0.08289318 | 0          | 3 | 1 | 0.30102999 | 0.30102999 |
| chr7 | 69330796 | 69492624 | 161829 | 3  | 1 | 0 | 0.02438896 | 0          | 3 | 1 | 0.51676182 | 0.30102999 |
| chr7 | 69492624 | 69563017 | 70394  | 2  | 2 | 0 | 0.02162467 | 0          | 5 | 1 | 0.68214471 | 0.30102999 |
| chr7 | 69563017 | 69709373 | 146357 | 2  | 2 | 0 | 0.0429175  | 0          | 4 | 1 | 0.47744371 | 0.30102999 |
| chr7 | 69709373 | 69709432 | 60     | 1  | 3 | 0 | 0.10122019 | 0          | 4 | 1 | 0.30102999 | 0.30102999 |
| chr7 | 69709432 | 69822421 | 112990 | 2  | 2 | 0 | 0.0429175  | 0          | 4 | 1 | 0.47744371 | 0.30102999 |
| chr7 | 69822421 | 69869807 | 47387  | 2  | 3 | 0 | 0.10122019 | 0          | 4 | 1 | 0.30102999 | 0.30102999 |
| chr7 | 69869807 | 69869866 | 60     | 1  | 3 | 0 | 0.05670724 | 0          | 5 | 1 | 0.45545077 | 0.30102999 |
| chr7 | 69869866 | 70037607 | 167742 | 4  | 3 | 0 | 0.30102999 | 0          | 2 | 1 |            |            |

|      |          |          |        |    |    |   |            |            |   |   |            |            |
|------|----------|----------|--------|----|----|---|------------|------------|---|---|------------|------------|
| chr7 | 73150418 | 73152527 | 2110   | 2  | 8  | 1 | 0.4250187  | 0.00478973 | 6 | 5 | 0.08122616 | 1.02643191 |
| chr7 | 73152527 | 73183363 | 30837  | 1  | 8  | 1 | 0.4250187  | 0.01091641 | 6 | 4 | 0.08122616 | 0.76005302 |
| chr7 | 73183363 | 73246898 | 63536  | 1  | 7  | 1 | 0.30102999 | 0.01091641 | 6 | 4 | 0.129913   | 0.76005302 |
| chr7 | 73246898 | 73313449 | 66552  | 4  | 7  | 1 | 0.30102999 | 0.00478973 | 6 | 5 | 0.129913   | 1.02643191 |
| chr7 | 73313449 | 73313508 | 60     | 1  | 8  | 1 | 0.4250187  | 0.00478973 | 6 | 5 | 0.08122616 | 1.02643191 |
| chr7 | 73313508 | 73445798 | 132291 | 1  | 7  | 1 | 0.30102999 | 0.00478973 | 6 | 5 | 0.129913   | 1.02643191 |
| chr7 | 73445798 | 73525221 | 79424  | 2  | 7  | 1 | 0.30102999 | 0.01091641 | 6 | 4 | 0.129913   | 0.76005302 |
| chr7 | 73525221 | 73700208 | 174988 | 8  | 8  | 1 | 0.4250187  | 0.00478973 | 6 | 5 | 0.08122616 | 1.02643191 |
| chr7 | 73700208 | 73773985 | 73778  | 2  | 8  | 1 | 0.4250187  | 0.01091641 | 6 | 4 | 0.08122616 | 0.76005302 |
| chr7 | 73773985 | 73901713 | 127729 | 4  | 8  | 1 | 0.30102999 | 0.01091641 | 7 | 4 | 0.13499366 | 0.76005302 |
| chr7 | 73901713 | 73944662 | 42950  | 2  | 10 | 1 | 0.4167287  | 0.01091641 | 8 | 4 | 0.08923391 | 0.76005302 |
| chr7 | 73944662 | 74024374 | 79713  | 3  | 11 | 1 | 0.55623409 | 0.01091641 | 8 | 4 | 0.05490675 | 0.76005302 |
| chr7 | 74024374 | 74090455 | 66082  | 1  | 7  | 1 | 0.30102999 | 0.01091641 | 7 | 4 | 0.13499366 | 0.76005302 |
| chr7 | 74090455 | 74119570 | 29116  | 1  | 7  | 1 | 0.20469099 | 0.02438996 | 7 | 3 | 0.20469099 | 0.51676182 |
| chr7 | 74119570 | 74339044 | 219475 | 2  | 6  | 1 | 0.20064824 | 0.05404976 | 6 | 2 | 0.20064824 | 0.30102999 |
| chr7 | 74339044 | 74481540 | 142497 | 1  | 5  | 1 | 0.12309572 | 0.05404976 | 6 | 2 | 0.30102999 | 0.30102999 |
| chr7 | 74481540 | 74485767 | 4228   | 1  | 5  | 1 | 0.19510895 | 0.05404976 | 5 | 2 | 0.19510895 | 0.30102999 |
| chr7 | 74485767 | 74485826 | 60     | 1  | 6  | 1 | 0.30102999 | 0.05404976 | 5 | 2 | 0.12309572 | 0.30102999 |
| chr7 | 74485826 | 75062013 | 576188 | 1  | 4  | 1 | 0.11390336 | 0.05404976 | 5 | 2 | 0.30102999 | 0.30102999 |
| chr7 | 75062013 | 75160961 | 98949  | 2  | 4  | 1 | 0.03812622 | 0.05404976 | 7 | 2 | 0.60763643 | 0.30102999 |
| chr7 | 75160961 | 75197522 | 36562  | 2  | 6  | 1 | 0.12309572 | 0.05404976 | 7 | 2 | 0.30102999 | 0.30102999 |
| chr7 | 75197522 | 75278702 | 81181  | 2  | 11 | 1 | 0.06713722 | 0.05404976 | 6 | 2 | 0.44141547 | 0.30102999 |
| chr7 | 75278702 | 75278761 | 60     | 1  | 5  | 1 | 0.12309572 | 0.05404976 | 6 | 2 | 0.30102999 | 0.30102999 |
| chr7 | 75278761 | 75546088 | 267328 | 6  | 4  | 1 | 0.06713722 | 0.05404976 | 2 | 2 | 0.44141547 | 0.30102999 |
| chr7 | 75546088 | 75729577 | 183490 | 5  | 4  | 1 | 0.06713722 | 0.1218695  | 6 | 1 | 0.44141547 | 0.1218695  |
| chr7 | 75729577 | 75853698 | 124122 | 2  | 3  | 1 | 0.03070643 | 0.1218695  | 6 | 1 | 0.63695542 | 0.1218695  |
| chr7 | 75853698 | 76139282 | 285585 | 11 | 3  | 1 | 0.03070643 | 0.05404976 | 6 | 2 | 0.63695542 | 0.30102999 |
| chr7 | 76139282 | 76144740 | 5459   | 2  | 4  | 1 | 0.03812622 | 0.05404976 | 7 | 2 | 0.60763643 | 0.30102999 |
| chr7 | 76144740 | 76200157 | 55418  | 1  | 4  | 1 | 0.03812622 | 0.1218695  | 7 | 1 | 0.60763643 | 0.1218695  |
| chr7 | 76200157 | 76230206 | 30050  | 2  | 4  | 1 | 0.03812622 | 0.05404976 | 7 | 2 | 0.60763643 | 0.30102999 |
| chr7 | 76230206 | 76476855 | 246650 | 1  | 4  | 1 | 0.11390336 | 0.1218695  | 5 | 1 | 0.30102999 | 0.1218695  |
| chr7 | 76476855 | 76583962 | 107108 | 1  | 4  | 0 | 0.11390336 | 0          | 5 | 1 | 0.30102999 | 0.30102999 |
| chr7 | 76583962 | 76724633 | 140672 | 1  | 3  | 0 | 0.17593012 | 0          | 3 | 1 | 0.17593012 | 0.30102999 |
| chr7 | 76724633 | 76724692 | 60     | 1  | 3  | 0 | 0.10122019 | 0          | 4 | 1 | 0.30102999 | 0.30102999 |
| chr7 | 76724692 | 76882615 | 157924 | 3  | 3  | 0 | 0.17593012 | 0          | 3 | 1 | 0.17593012 | 0.30102999 |
| chr7 | 76882615 | 76941286 | 58672  | 1  | 3  | 0 | 0.08289318 | 0          | 3 | 1 | 0.30102999 | 0.30102999 |
| chr7 | 76941286 | 76980543 | 39258  | 2  | 2  | 0 | 0.08289318 | 0          | 3 | 2 | 0.30102999 | 0.61140001 |
| chr7 | 76980543 | 77954661 | 974119 | 20 | 2  | 0 | 0.1575501  | 0          | 2 | 2 | 0.1575501  | 0.61140001 |
| chr7 | 77954661 | 78015051 | 60391  | 2  | 2  | 0 | 0.08289318 | 0          | 3 | 2 | 0.30102999 | 0.61140001 |
| chr7 | 78015051 | 78095241 | 80191  | 2  | 2  | 0 | 0.1575501  | 0          | 2 | 2 | 0.1575501  | 0.61140001 |
| chr7 | 78095241 | 78256506 | 161266 | 4  | 2  | 0 | 0.08289318 | 0          | 3 | 2 | 0.30102999 | 0.61140001 |
| chr7 | 78256506 | 78364961 | 108456 | 3  | 2  | 0 | 0.08289318 | 0          | 3 | 1 | 0.30102999 | 0.30102999 |
| chr7 | 78364961 | 78554817 | 189857 | 4  | 2  | 0 | 0.1575501  | 0          | 2 | 1 | 0.1575501  | 0.30102999 |
| chr7 | 78554817 | 78711132 | 156316 | 2  | 1  | 0 | 0.05404976 | 0          | 2 | 0 | 0.30102999 | 0          |
| chr7 | 78711132 | 79241694 | 530563 | 11 | 1  | 0 | 0.05404976 | 0          | 2 | 1 | 0.30102999 | 0.30102999 |
| chr7 | 79241694 | 79542478 | 312585 | 4  | 1  | 0 | 0.02438996 | 0          | 3 | 1 | 0.51676182 | 0.30102999 |
| chr7 | 79542478 | 79790594 | 236317 | 3  | 2  | 0 | 0.08289318 | 0          | 3 | 1 | 0.30102999 | 0.30102999 |
| chr7 | 79790594 | 79790653 | 60     | 1  | 3  | 0 | 0.10122019 | 0          | 4 | 1 | 0.30102999 | 0.30102999 |
| chr7 | 79790653 | 79903642 | 112990 | 3  | 2  | 0 | 0.08289318 | 0          | 3 | 1 | 0.30102999 | 0.30102999 |
| chr7 | 79903642 | 79903701 | 60     | 1  | 2  | 0 | 0.02162467 | 0          | 5 | 1 | 0.68214471 | 0.30102999 |
| chr7 | 79903701 | 80371841 | 468141 | 9  | 2  | 0 | 0.08289318 | 0          | 3 | 1 | 0.30102999 | 0.30102999 |
| chr7 | 80371841 | 80430058 | 58218  | 2  | 2  | 0 | 0.02162467 | 0          | 5 | 1 | 0.68214471 | 0.30102999 |
| chr7 | 80430058 | 80546138 | 116081 | 4  | 3  | 0 | 0.05670724 | 0          | 5 | 1 | 0.45545077 | 0.30102999 |
| chr7 | 80546138 | 80730949 | 184812 | 2  | 2  | 0 | 0.02162467 | 0          | 5 | 1 | 0.68214471 | 0.30102999 |
| chr7 | 80730949 | 80731008 | 60     | 1  | 3  | 1 | 0.05670724 | 0.1218695  | 5 | 1 | 0.45545077 | 0.1218695  |
| chr7 | 80731008 | 80878634 | 147627 | 1  | 3  | 0 | 0.05670724 | 0          | 5 | 1 | 0.45545077 | 0.30102999 |
| chr7 | 80878634 | 80878693 | 60     | 1  | 3  | 1 | 0.05670724 | 0.1218695  | 5 | 1 | 0.45545077 | 0.1218695  |
| chr7 | 80878693 | 80998965 | 120273 | 2  | 2  | 0 | 0.02162467 | 0          | 5 | 1 | 0.68214471 | 0.30102999 |
| chr7 | 80998965 | 81208524 | 209560 | 2  | 3  | 2 | 0.05670724 | 0.30102999 | 5 | 1 | 0.45545077 | 0.05404976 |
| chr7 | 81208524 | 81208583 | 60     | 1  | 3  | 3 | 0.05670724 | 0.51676182 | 5 | 1 | 0.45545077 | 0.02438996 |
| chr7 | 81208583 | 81329811 | 121229 | 2  | 2  | 1 | 0.0429175  | 0.1218695  | 4 | 1 | 0.47744371 | 0.1218695  |
| chr7 | 81329811 | 81388038 | 58228  | 7  | 2  | 3 | 0.0429175  | 0.51676182 | 4 | 1 | 0.47744371 | 0.02438996 |
| chr7 | 81388038 | 81639246 | 251209 | 4  | 2  | 2 | 0.08289318 | 0.30102999 | 3 | 1 | 0.30102999 | 0.05404976 |
| chr7 | 81639246 | 81679933 | 40688  | 2  | 3  | 2 | 0.10122019 | 0.30102999 | 4 | 1 | 0.30102999 | 0.05404976 |
| chr7 | 81679933 | 81850748 | 170816 | 4  | 3  | 2 | 0.17593012 | 0.30102999 | 3 | 1 | 0.17593012 | 0.05404976 |
| chr7 | 81850748 | 81964573 | 113026 | 3  | 2  | 1 | 0.17593012 | 0.1218695  | 3 | 1 | 0.17593012 | 0.1218695  |
| chr7 | 81964573 | 82027636 | 63064  | 2  | 3  | 0 | 0.17593012 | 0          | 3 | 1 | 0.17593012 | 0.30102999 |
| chr7 | 82027636 | 82159009 | 131374 | 3  | 3  | 1 | 0.17593012 | 0.05404976 | 3 | 2 | 0.17593012 | 0.30102999 |
| chr7 | 82159009 | 82159068 | 60     | 1  | 3  | 1 | 0.10122019 | 0.05404976 | 4 | 2 | 0.30102999 | 0.30102999 |
| chr7 | 82159068 | 82231161 | 72094  | 1  | 3  | 0 | 0.10122019 | 0          | 4 | 2 | 0.30102999 | 0.61140001 |
| chr7 | 82231161 | 82231220 | 60     | 1  | 4  | 0 | 0.18734596 | 0          | 4 | 2 | 0.18734596 | 0.61140001 |
| chr7 | 82231220 | 82356348 | 125129 | 1  | 3  | 0 | 0.10122019 | 0          | 4 | 2 | 0.30102999 | 0.61140001 |
| chr7 | 82356348 | 82460632 | 104285 | 2  | 0  | 2 | 0.08289318 | 0          | 3 | 2 | 0.30102999 | 0.61140001 |
| chr7 | 82460632 | 82460691 | 60     | 1  | 3  | 0 | 0.10122019 | 0          | 4 | 2 | 0.30102999 | 0.61140001 |
| chr7 | 82460691 | 82682438 | 221748 | 4  | 2  | 0 | 0.08289318 | 0          | 3 | 2 | 0.30102999 | 0.61140001 |
| chr7 | 82682438 | 82736112 | 53675  | 2  | 2  | 0 | 0.0429175  | 0          | 2 | 2 | 0.47744371 | 0.61140001 |
| chr7 | 82736112 | 82779289 | 43178  | 1  | 2  | 0 | 0.08289318 | 0          | 3 | 2 | 0.30102999 | 0.61140001 |
| chr7 | 82779289 | 82870498 | 91210  | 1  | 2  | 0 | 0.1575501  | 0          | 2 | 2 | 0.1575501  | 0.61140001 |
| chr7 | 82870498 | 82995159 | 124662 | 2  | 4  | 0 | 0.30102999 | 0          | 3 | 2 | 0.10122019 | 0.61140001 |
| chr7 | 82995159 | 83037696 | 42538  | 1  | 3  | 0 | 0.17593012 | 0          | 3 | 2 | 0.17593012 | 0.61140001 |
| chr7 | 83037696 | 83123092 | 85397  | 2  | 2  | 0 | 0.08289318 | 0          | 3 | 2 | 0.30102999 | 0.61140001 |
| chr7 | 83123092 | 83123151 | 60     | 1  | 4  | 0 | 0.30102999 | 0          | 3 | 2 | 0.10122019 | 0.61140001 |
| chr7 | 83123151 | 83229423 | 106273 | 2  | 3  | 0 | 0.17593012 | 0          | 3 | 2 | 0.17593012 | 0.61140001 |
| chr7 | 83229423 | 83229482 | 60     | 1  | 4  | 0 | 0.30102999 | 0          | 3 | 2 | 0.10122019 | 0.61140001 |
| chr7 | 83229482 | 83229365 | 99884  | 2  | 3  | 0 | 0.17593012 | 0          | 3 | 2 | 0.17593012 | 0.61140001 |
| chr7 | 83229365 | 83636840 | 307476 | 4  | 4  | 0 | 0.30102999 | 0          | 3 | 2 | 0.10122019 | 0.61140001 |
| chr7 | 83636840 | 83739821 | 102982 | 2  | 2  | 0 | 0.17593012 | 0          | 3 | 2 | 0.17593012 | 0.61140001 |
| chr7 | 83739821 | 83791547 | 51727  | 1  | 3  | 0 | 0.30102999 | 0          | 2 | 2 | 0.08289318 | 0.61140001 |
| chr7 | 83791547 | 83973024 | 181478 | 3  | 3  | 0 | 0.17593012 | 0          | 3 | 2 | 0.17593012 | 0.61140001 |
| chr7 | 83973024 | 84509221 | 536198 | 5  | 1  | 0 | 0.1218695  | 0          | 1 | 2 | 0.1218695  | 0.61140001 |
| chr7 | 84509221 | 84763387 | 254167 | 5  | 0  | 0 | 0          | 0          | 1 | 1 | 0.30102999 | 0.30102999 |
| chr7 | 84763387 | 84763446 | 60     | 1  | 0  | 1 | 0.1218695  | 0          | 1 | 1 | 0.30102999 | 0.1218695  |
| chr7 | 84763446 | 85258816 | 495371 | 3  | 0  | 0 | 0          | 0          | 1 | 1 | 0.30102999 | 0.30102999 |
| chr7 | 85258816 | 8543485  |        |    |    |   |            |            |   |   |            |            |

|      |          |          |        |    |   |            |             |           |   |            |            |            |
|------|----------|----------|--------|----|---|------------|-------------|-----------|---|------------|------------|------------|
| chr7 | 89038275 | 89322628 | 284354 | 2  | 2 | 0          | 0.08289318  | 0         | 3 | 1          | 0.30102999 | 0.30102999 |
| chr7 | 89322628 | 89445171 | 122544 | 2  | 2 | 0          | 0.0429175   | 0         | 4 | 1          | 0.47744371 | 0.30102999 |
| chr7 | 89445171 | 89445230 | 60     | 1  | 0 | 0.02162467 | 0           | 5         | 1 | 0.68214471 | 0.30102999 |            |
| chr7 | 89445230 | 89627519 | 182290 | 1  | 2 | 0          | 0.0429175   | 0         | 4 | 1          | 0.47744371 | 0.30102999 |
| chr7 | 89627519 | 89917070 | 289552 | 8  | 2 | 0          | 0.08289318  | 0         | 3 | 1          | 0.30102999 | 0.30102999 |
| chr7 | 89917070 | 89982216 | 65147  | 2  | 2 | 0          | 0.08289318  | 0         | 3 | 0          | 0.30102999 | 0          |
| chr7 | 89982216 | 90043788 | 61573  | 4  | 2 | 0          | 0.08289318  | 0         | 3 | 1          | 0.30102999 | 0.30102999 |
| chr7 | 90043788 | 90112283 | 68496  | 2  | 2 | 0          | 0.02162467  | 0         | 5 | 1          | 0.68214471 | 0.30102999 |
| chr7 | 90112283 | 90227502 | 115220 | 2  | 2 | 0          | 0.0429175   | 0         | 4 | 1          | 0.47744371 | 0.30102999 |
| chr7 | 90227502 | 90227561 | 60     | 1  | 2 | 0          | 0.02162467  | 0         | 5 | 1          | 0.68214471 | 0.30102999 |
| chr7 | 90227561 | 90366644 | 139084 | 3  | 2 | 0          | 0.0429175   | 0         | 4 | 1          | 0.47744371 | 0.30102999 |
| chr7 | 90366644 | 90747356 | 380713 | 9  | 2 | 0          | 0.02162467  | 0         | 5 | 1          | 0.68214471 | 0.30102999 |
| chr7 | 90747356 | 90792406 | 45051  | 2  | 3 | 0          | 0.05670724  | 0         | 5 | 1          | 0.45545077 | 0.30102999 |
| chr7 | 90792406 | 90897006 | 104601 | 2  | 3 | 0          | 0.05670724  | 0         | 5 | 0          | 0.45545077 | 0          |
| chr7 | 90897006 | 90968721 | 71716  | 2  | 3 | 0          | 0.01598258  | 0         | 7 | 1          | 0.84395715 | 0.30102999 |
| chr7 | 90968721 | 90988735 | 20015  | 1  | 3 | 0          | 0.03070643  | 0         | 6 | 1          | 0.63695542 | 0.30102999 |
| chr7 | 90988735 | 91145751 | 157017 | 1  | 3 | 0          | 0.10122019  | 0         | 4 | 1          | 0.30102999 | 0.30102999 |
| chr7 | 91145751 | 91251883 | 106133 | 2  | 3 | 0          | 0.05670724  | 0         | 5 | 1          | 0.45545077 | 0.30102999 |
| chr7 | 91251883 | 91251942 | 60     | 1  | 3 | 0          | 0.01598258  | 0         | 7 | 1          | 0.84395715 | 0.30102999 |
| chr7 | 91251942 | 91404315 | 152374 | 1  | 3 | 0          | 0.01598258  | 0         | 7 | 0          | 0.84395715 | 0          |
| chr7 | 91404315 | 91457963 | 53649  | 2  | 2 | 0          | 0.004893743 | 0         | 7 | 0          | 1.16581773 | 0.30102999 |
| chr7 | 91457963 | 91571480 | 113518 | 3  | 2 | 0          | 0.004893743 | 0         | 7 | 1          | 1.16581773 | 0.30102999 |
| chr7 | 91571480 | 91571539 | 60     | 1  | 3 | 0          | 0.01598258  | 0         | 7 | 1          | 0.84395715 | 0.30102999 |
| chr7 | 91571539 | 91762089 | 190551 | 4  | 3 | 0          | 0.03070643  | 0         | 6 | 1          | 0.63695542 | 0.30102999 |
| chr7 | 91762089 | 91829045 | 66957  | 2  | 3 | 0          | 0.05670724  | 0         | 5 | 1          | 0.45545077 | 0.30102999 |
| chr7 | 91829045 | 91873423 | 44379  | 2  | 3 | 0          | 0.10122019  | 0         | 4 | 1          | 0.30102999 | 0.30102999 |
| chr7 | 91873423 | 91914301 | 40879  | 2  | 3 | 0          | 0.05670724  | 0         | 5 | 1          | 0.45545077 | 0.30102999 |
| chr7 | 91914301 | 92247424 | 333124 | 10 | 3 | 0          | 0.03070643  | 0         | 6 | 1          | 0.63695542 | 0.30102999 |
| chr7 | 92247424 | 92279132 | 31709  | 1  | 3 | 0          | 0.03070643  | 0         | 6 | 0          | 0.63695542 | 0          |
| chr7 | 92279132 | 92312387 | 33256  | 2  | 3 | 0          | 0.01598258  | 0         | 7 | 0          | 0.84395715 | 0          |
| chr7 | 92312387 | 92441015 | 128629 | 4  | 3 | 0          | 0.01598258  | 0         | 7 | 1          | 0.84395715 | 0.30102999 |
| chr7 | 92441015 | 92762042 | 321028 | 4  | 3 | 0          | 0.03070643  | 0         | 6 | 1          | 0.63695542 | 0.30102999 |
| chr7 | 92762042 | 92793467 | 31426  | 2  | 4 | 0          | 0.03812622  | 0         | 7 | 1          | 0.60763643 | 0.30102999 |
| chr7 | 92793467 | 92869219 | 75753  | 2  | 3 | 0          | 0.01598258  | 0         | 7 | 1          | 0.84395715 | 0.30102999 |
| chr7 | 92869219 | 92940523 | 71305  | 3  | 3 | 0          | 0.03070643  | 0         | 6 | 1          | 0.63695542 | 0.30102999 |
| chr7 | 92940523 | 93014702 | 74180  | 1  | 3 | 0          | 0.05670724  | 0         | 5 | 1          | 0.45545077 | 0.30102999 |
| chr7 | 93014702 | 93113485 | 98784  | 3  | 4 | 0          | 0.11390336  | 0         | 5 | 1          | 0.30102999 | 0.30102999 |
| chr7 | 93113485 | 93128868 | 15384  | 2  | 4 | 0          | 0.03812622  | 0         | 7 | 1          | 0.60763643 | 0.30102999 |
| chr7 | 93128868 | 93170460 | 41593  | 1  | 4 | 0          | 0.11390336  | 0         | 5 | 1          | 0.30102999 | 0.30102999 |
| chr7 | 93170460 | 93199449 | 28990  | 1  | 4 | 0          | 0.18734596  | 0         | 4 | 1          | 0.18734596 | 0.30102999 |
| chr7 | 93199449 | 93233925 | 34477  | 2  | 4 | 1          | 0.18734596  | 0.1218695 | 4 | 1          | 0.18734596 | 0.1218695  |
| chr7 | 93233925 | 93233984 | 60     | 1  | 4 | 1          | 0.03812622  | 0.1218695 | 7 | 1          | 0.60763643 | 0.1218695  |
| chr7 | 93233984 | 93389236 | 155253 | 2  | 4 | 1          | 0.30102999  | 0.1218695 | 3 | 1          | 0.10122019 | 0.1218695  |
| chr7 | 93389236 | 93389295 | 60     | 1  | 4 | 1          | 0.11390336  | 0.1218695 | 5 | 1          | 0.30102999 | 0.1218695  |
| chr7 | 93389295 | 93472023 | 82729  | 1  | 4 | 0          | 0.18734596  | 0         | 4 | 1          | 0.18734596 | 0.30102999 |
| chr7 | 93472023 | 93536746 | 64724  | 4  | 4 | 0          | 0.30102999  | 0         | 3 | 1          | 0.10122019 | 0.30102999 |
| chr7 | 93536746 | 93633040 | 96295  | 6  | 4 | 0          | 0.18734596  | 0         | 4 | 1          | 0.18734596 | 0.30102999 |
| chr7 | 93633040 | 93633099 | 60     | 1  | 4 | 1          | 0.18734596  | 0.1218695 | 4 | 1          | 0.18734596 | 0.1218695  |
| chr7 | 93633099 | 93797640 | 164542 | 1  | 4 | 0          | 0.18734596  | 0         | 4 | 1          | 0.18734596 | 0.30102999 |
| chr7 | 93797640 | 93971384 | 173745 | 3  | 5 | 0          | 0.07511598  | 0         | 7 | 1          | 0.43181735 | 0.30102999 |
| chr7 | 93971384 | 94047784 | 76401  | 2  | 4 | 0          | 0.06713722  | 0         | 6 | 1          | 0.44414547 | 0.30102999 |
| chr7 | 94047784 | 94082821 | 35038  | 3  | 4 | 0          | 0.04407651  | 0         | 8 | 1          | 0.58747015 | 0.30102999 |
| chr7 | 94082821 | 94180435 | 97615  | 2  | 4 | 0          | 0.03812622  | 0         | 7 | 1          | 0.60763643 | 0.30102999 |
| chr7 | 94180435 | 94229044 | 48610  | 3  | 4 | 0          | 0.02074938  | 0         | 8 | 1          | 0.79906872 | 0.30102999 |
| chr7 | 94229044 | 94376650 | 147607 | 4  | 4 | 0          | 0.03812622  | 0         | 7 | 1          | 0.60763643 | 0.30102999 |
| chr7 | 94376650 | 94399796 | 23147  | 1  | 4 | 0          | 0.06713722  | 0         | 6 | 1          | 0.44414547 | 0.30102999 |
| chr7 | 94399796 | 94399855 | 60     | 1  | 4 | 0          | 0.03812622  | 0         | 7 | 1          | 0.60763643 | 0.30102999 |
| chr7 | 94399855 | 94533676 | 133822 | 2  | 4 | 0          | 0.03812622  | 0         | 7 | 0          | 0.60763643 | 0          |
| chr7 | 94533676 | 94813618 | 279943 | 7  | 4 | 0          | 0.03812622  | 0         | 7 | 1          | 0.60763643 | 0.30102999 |
| chr7 | 94813618 | 94882150 | 68533  | 2  | 4 | 0          | 0.03812622  | 0         | 7 | 0          | 0.60763643 | 0          |
| chr7 | 94882150 | 94989596 | 107447 | 3  | 4 | 0          | 0.03812622  | 0         | 7 | 1          | 0.60763643 | 0.30102999 |
| chr7 | 94989596 | 95034510 | 44915  | 3  | 5 | 0          | 0.07511598  | 0         | 7 | 1          | 0.43181735 | 0.30102999 |
| chr7 | 95034510 | 95063886 | 29377  | 1  | 5 | 0          | 0.12309572  | 0         | 6 | 1          | 0.30102999 | 0.30102999 |
| chr7 | 95063886 | 95115411 | 51526  | 1  | 5 | 0          | 0.12309572  | 0         | 6 | 0          | 0.30102999 | 0          |
| chr7 | 95115411 | 95167037 | 51627  | 2  | 5 | 0          | 0.07511598  | 0         | 7 | 0          | 0.43181735 | 0          |
| chr7 | 95167037 | 95168573 | 1501   | 2  | 5 | 0          | 0.07511598  | 0         | 7 | 1          | 0.43181735 | 0.30102999 |
| chr7 | 95168573 | 95388063 | 219527 | 4  | 4 | 0          | 0.11390336  | 0         | 5 | 1          | 0.30102999 | 0.30102999 |
| chr7 | 95388063 | 95495600 | 107538 | 3  | 5 | 0          | 0.19510895  | 0         | 5 | 1          | 0.19510895 | 0.30102999 |
| chr7 | 95495600 | 95495659 | 60     | 1  | 5 | 0          | 0.12309572  | 0         | 6 | 1          | 0.30102999 | 0.30102999 |
| chr7 | 95495659 | 95579648 | 83990  | 2  | 5 | 0          | 0.19510895  | 0         | 5 | 1          | 0.19510895 | 0.30102999 |
| chr7 | 95579648 | 95614200 | 34553  | 1  | 3 | 0          | 0.05670724  | 0         | 5 | 1          | 0.45545077 | 0.30102999 |
| chr7 | 95614200 | 95659720 | 45521  | 1  | 3 | 0          | 0.05670724  | 0         | 5 | 0          | 0.45545077 | 0          |
| chr7 | 95659720 | 95659779 | 60     | 1  | 4 | 0          | 0.06713722  | 0         | 6 | 0          | 0.44414547 | 0          |
| chr7 | 95659779 | 95723689 | 63911  | 1  | 3 | 0          | 0.03070643  | 0         | 6 | 0          | 0.63695542 | 0.30102999 |
| chr7 | 95723689 | 95749059 | 25371  | 2  | 3 | 0          | 0.03070643  | 0         | 6 | 1          | 0.63695542 | 0.30102999 |
| chr7 | 95749059 | 95814120 | 65062  | 1  | 3 | 0          | 0.05670724  | 0         | 5 | 1          | 0.45545077 | 0.30102999 |
| chr7 | 95814120 | 95863771 | 49652  | 4  | 4 | 0          | 0.11390336  | 0         | 5 | 1          | 0.30102999 | 0.30102999 |
| chr7 | 95863771 | 95971363 | 107593 | 2  | 4 | 0          | 0.18734596  | 0         | 4 | 1          | 0.18734596 | 0.30102999 |
| chr7 | 95971363 | 95971422 | 60     | 1  | 3 | 0          | 0.30102999  | 0         | 4 | 1          | 0.11390336 | 0.30102999 |
| chr7 | 95971422 | 96055262 | 83841  | 1  | 4 | 0          | 0.18734596  | 0         | 4 | 1          | 0.18734596 | 0.30102999 |
| chr7 | 96055262 | 96276166 | 220905 | 3  | 3 | 0          | 0.10122019  | 0         | 4 | 1          | 0.30102999 | 0.30102999 |
| chr7 | 96276166 | 96361170 | 260005 | 7  | 4 | 0          | 0.18734596  | 0         | 4 | 1          | 0.18734596 | 0.30102999 |
| chr7 | 96361170 | 96710984 | 174815 | 5  | 4 | 0          | 0.11390336  | 0         | 5 | 1          | 0.30102999 | 0.30102999 |
| chr7 | 96710984 | 96786684 | 75701  | 2  | 4 | 0          | 0.18734596  | 0         | 4 | 1          | 0.18734596 | 0.30102999 |
| chr7 | 96786684 | 96969273 | 182590 | 2  | 3 | 0          | 0.17593012  | 0         | 3 | 0          | 0.17593012 | 0          |
| chr7 | 96969273 | 97038238 | 68966  | 2  | 3 | 0          | 0.10122019  | 0         | 4 | 0          | 0.30102999 | 0          |
| chr7 | 97038238 | 97242449 | 204212 | 2  | 3 | 0          | 0.17593012  | 0         | 3 | 0          | 0.17593012 | 0          |
| chr7 | 97242449 | 97242508 | 60     | 1  | 3 | 0          | 0.17593012  | 0         | 3 | 1          | 0.17593012 | 0.30102999 |
| chr7 | 97242508 | 97428148 | 185641 | 3  | 3 | 0          | 0.17593012  | 0         | 3 | 0          | 0.17593012 | 0          |
| chr7 | 97428148 | 97483869 | 55722  | 1  | 2 | 0          | 0.08289318  | 0         | 3 | 0          | 0.30102999 | 0          |
| chr7 | 97483869 | 97488141 | 4273   | 3  | 2 | 0          | 0.08289318  | 0         | 3 | 1          | 0.30102999 | 0.30102999 |
| chr7 | 97488141 | 97597642 | 109502 | 4  | 3 | 0          | 0.17593012  | 0         | 3 | 1          | 0.17593012 | 0.30102999 |
| chr7 | 97597642 | 97597701 | 60     | 1  | 3 | 0          | 0.17593012  | 0         | 3 | 2          | 0.61140001 | 0.30102999 |
| chr7 | 97597701 | 97652881 | 55181  | 1  | 2 | 0          | 0.08289318  | 0         | 3 | 1          | 0.30102999 | 0.30102999 |
| chr7 | 97652881 | 97749450 | 96570  | 2  | 2 | 0          | 0.4744371   | 0         | 4 | 1          | 0.47744371 | 0.30102999 |
| chr7 | 97749450 | 97749509 | 60     | 1  | 4 | 0          | 0.18734596  | 0         | 4 | 1          | 0.18734596 | 0.30102999 |
| chr7 | 97749509 | 97852707 | 103199 | 2  | 3 | 0          | 0.10122019  | 0         | 4 |            |            |            |

|      |           |           |        |   |    |   |            |            |    |   |            |            |
|------|-----------|-----------|--------|---|----|---|------------|------------|----|---|------------|------------|
| chr7 | 99633336  | 99633395  | 60     | 1 | 9  | 1 | 0.30102999 | 0.02438896 | 8  | 3 | 0.13872638 | 0.51676182 |
| chr7 | 99633395  | 99656999  | 23605  | 1 | 9  | 1 | 0.42015402 | 0.02438896 | 7  | 3 | 0.08584816 | 0.51676182 |
| chr7 | 99656999  | 99671423  | 14425  | 2 | 8  | 1 | 0.30102999 | 0.02438896 | 7  | 3 | 0.13499366 | 0.51676182 |
| chr7 | 99671423  | 99688525  | 17103  | 3 | 9  | 1 | 0.42015402 | 0.02438896 | 7  | 3 | 0.08584816 | 0.51676182 |
| chr7 | 99688525  | 99718475  | 29951  | 8 | 9  | 1 | 0.30102999 | 0.02438896 | 8  | 3 | 0.13872638 | 0.51676182 |
| chr7 | 99718475  | 99767299  | 48825  | 5 | 9  | 2 | 0.30102999 | 0.08289118 | 8  | 3 | 0.13872638 | 0.30102999 |
| chr7 | 99767299  | 99945627  | 178329 | 4 | 9  | 1 | 0.42015402 | 0.02438896 | 7  | 3 | 0.08584816 | 0.51676182 |
| chr7 | 99945627  | 99974771  | 29145  | 4 | 9  | 2 | 0.30102999 | 0.0429175  | 8  | 4 | 0.13872638 | 0.47744371 |
| chr7 | 99974771  | 100067865 | 93095  | 2 | 9  | 1 | 0.30102999 | 0.02438896 | 8  | 3 | 0.13872638 | 0.51676182 |
| chr7 | 100067865 | 100083726 | 15862  | 3 | 10 | 2 | 0.4167287  | 0.0429175  | 8  | 4 | 0.08923391 | 0.47744371 |
| chr7 | 100083726 | 100198681 | 114956 | 2 | 10 | 1 | 0.4167287  | 0.02438896 | 8  | 3 | 0.08923391 | 0.51676182 |
| chr7 | 100198681 | 100279058 | 80378  | 6 | 11 | 1 | 0.55623409 | 0.02438896 | 8  | 3 | 0.05490675 | 0.51676182 |
| chr7 | 100279058 | 100320692 | 41635  | 3 | 12 | 1 | 0.72109894 | 0.01091641 | 8  | 4 | 0.03209037 | 0.76005302 |
| chr7 | 100320692 | 100421854 | 101163 | 3 | 11 | 1 | 0.55623409 | 0.01091641 | 8  | 4 | 0.05490675 | 0.76005302 |
| chr7 | 100421854 | 100649012 | 227159 | 6 | 12 | 1 | 0.55190077 | 0.01091641 | 9  | 4 | 0.05585833 | 0.76005302 |
| chr7 | 100649012 | 100701931 | 52920  | 2 | 13 | 1 | 0.54980098 | 0.01091641 | 10 | 4 | 0.0574087  | 0.76005302 |
| chr7 | 100701931 | 100733164 | 31234  | 2 | 14 | 1 | 0.71353304 | 0.01091641 | 10 | 4 | 0.03344703 | 0.76005302 |
| chr7 | 100733164 | 100733213 | 50     | 1 | 16 | 1 | 0.91308053 | 0.01091641 | 11 | 4 | 0.01767679 | 0.76005302 |
| chr7 | 100733213 | 100814592 | 81380  | 8 | 15 | 1 | 0.90719478 | 0.01091641 | 10 | 4 | 0.01817691 | 0.76005302 |
| chr7 | 100814592 | 100886535 | 71944  | 7 | 16 | 1 | 1.13428373 | 0.01091641 | 10 | 4 | 0.00909834 | 0.76005302 |
| chr7 | 100886535 | 100967178 | 80644  | 2 | 15 | 1 | 0.90719478 | 0.01091641 | 10 | 4 | 0.01817691 | 0.76005302 |
| chr7 | 100967178 | 100988791 | 31614  | 2 | 15 | 1 | 0.90719478 | 0.02438896 | 10 | 3 | 0.01817691 | 0.51676182 |
| chr7 | 100988791 | 101049499 | 50709  | 1 | 14 | 1 | 0.71353304 | 0.02438896 | 10 | 3 | 0.03344703 | 0.51676182 |
| chr7 | 101049499 | 101092135 | 42637  | 1 | 13 | 1 | 0.54980098 | 0.02438896 | 10 | 3 | 0.0574087  | 0.51676182 |
| chr7 | 101092135 | 101149639 | 57505  | 2 | 14 | 1 | 0.71353304 | 0.02438896 | 10 | 3 | 0.03344703 | 0.51676182 |
| chr7 | 101149639 | 101149698 | 60     | 1 | 16 | 1 | 1.13428373 | 0.02438896 | 10 | 3 | 0.00909834 | 0.51676182 |
| chr7 | 101149698 | 101269072 | 119375 | 4 | 15 | 1 | 0.90719478 | 0.02438896 | 10 | 3 | 0.01817691 | 0.51676182 |
| chr7 | 101269072 | 101409332 | 140261 | 3 | 14 | 1 | 0.90719478 | 0.02438896 | 9  | 3 | 0.01817691 | 0.51676182 |
| chr7 | 101409332 | 101463620 | 54289  | 1 | 13 | 1 | 0.71538971 | 0.02438896 | 9  | 3 | 0.03310393 | 0.51676182 |
| chr7 | 101463620 | 101463679 | 60     | 1 | 15 | 1 | 0.90719478 | 0.02438896 | 10 | 3 | 0.01817691 | 0.51676182 |
| chr7 | 101463679 | 101572570 | 108892 | 2 | 13 | 1 | 0.71538971 | 0.05404976 | 9  | 2 | 0.03310393 | 0.30102999 |
| chr7 | 101572570 | 101658905 | 86336  | 3 | 13 | 1 | 0.71538971 | 0.02438896 | 9  | 3 | 0.03310393 | 0.51676182 |
| chr7 | 101658905 | 101790733 | 131829 | 3 | 11 | 1 | 0.41444892 | 0.02438896 | 9  | 3 | 0.09154957 | 0.51676182 |
| chr7 | 101790733 | 101790792 | 60     | 1 | 12 | 1 | 0.55190077 | 0.02438896 | 9  | 3 | 0.05585833 | 0.51676182 |
| chr7 | 101790792 | 101836705 | 45914  | 1 | 9  | 1 | 0.30102999 | 0.05404976 | 8  | 2 | 0.13872638 | 0.30102999 |
| chr7 | 101836705 | 101892906 | 56202  | 1 | 8  | 0 | 0.20764654 | 0          | 8  | 0 | 0.20764654 | 0          |
| chr7 | 101892906 | 101931864 | 38959  | 2 | 9  | 0 | 0.30102999 | 0          | 8  | 0 | 0.13872638 | 0          |
| chr7 | 101931864 | 101972013 | 40150  | 1 | 7  | 0 | 0.13499366 | 0          | 8  | 0 | 0.30102999 | 0          |
| chr7 | 101972013 | 102053011 | 80999  | 3 | 7  | 0 | 0.20469099 | 0          | 7  | 0 | 0.20469099 | 0          |
| chr7 | 102053011 | 102053070 | 60     | 1 | 8  | 0 | 0.20764654 | 0          | 8  | 0 | 0.20764654 | 0          |
| chr7 | 102053070 | 102108989 | 55920  | 3 | 8  | 0 | 0.30102999 | 0          | 7  | 0 | 0.13499366 | 0          |
| chr7 | 102108989 | 102114142 | 5154   | 2 | 7  | 0 | 0.20469099 | 0          | 7  | 0 | 0.20469099 | 0          |
| chr7 | 102114142 | 102353540 | 239399 | 1 | 6  | 0 | 0.129913   | 0          | 7  | 0 | 0.30102999 | 0          |
| chr7 | 102353540 | 102448618 | 95079  | 3 | 7  | 0 | 0.20469099 | 0          | 7  | 0 | 0.20469099 | 0          |
| chr7 | 102448618 | 102491806 | 43189  | 2 | 7  | 0 | 0.13499366 | 0          | 8  | 0 | 0.30102999 | 0          |
| chr7 | 102491806 | 102555946 | 64141  | 2 | 6  | 0 | 0.08122616 | 0          | 8  | 0 | 0.4250187  | 0          |
| chr7 | 102555946 | 102939691 | 383746 | 6 | 6  | 0 | 0.129913   | 0          | 7  | 0 | 0.30102999 | 0          |
| chr7 | 102939691 | 102988391 | 48701  | 3 | 6  | 0 | 0.129913   | 0          | 7  | 1 | 0.30102999 | 0.30102999 |
| chr7 | 102988391 | 102988450 | 60     | 1 | 7  | 0 | 0.20469099 | 0          | 7  | 1 | 0.20469099 | 0.30102999 |
| chr7 | 102988450 | 103032213 | 43764  | 1 | 6  | 0 | 0.129913   | 0          | 7  | 1 | 0.30102999 | 0.30102999 |
| chr7 | 103032213 | 103071413 | 39201  | 2 | 7  | 0 | 0.20469099 | 0          | 7  | 1 | 0.20469099 | 0.30102999 |
| chr7 | 103071413 | 103194117 | 122705 | 2 | 5  | 0 | 0.07511598 | 0          | 7  | 1 | 0.43181735 | 0.30102999 |
| chr7 | 103194117 | 103248033 | 53917  | 2 | 5  | 0 | 0.04407651 | 0          | 8  | 1 | 0.58747015 | 0.30102999 |
| chr7 | 103248033 | 103248092 | 60     | 1 | 7  | 0 | 0.05232577 | 0          | 10 | 1 | 0.56314362 | 0.30102999 |
| chr7 | 103248092 | 103294597 | 46506  | 1 | 6  | 0 | 0.129913   | 0          | 7  | 1 | 0.30102999 | 0.30102999 |
| chr7 | 103294597 | 103389855 | 95259  | 2 | 6  | 0 | 0.129913   | 0          | 7  | 0 | 0.30102999 | 0          |
| chr7 | 103389855 | 103389914 | 60     | 1 | 7  | 0 | 0.08584816 | 0          | 9  | 1 | 0.42015402 | 0.30102999 |
| chr7 | 103389914 | 103433940 | 44027  | 1 | 6  | 0 | 0.08122616 | 0          | 8  | 1 | 0.4250187  | 0.30102999 |
| chr7 | 103433940 | 103479678 | 45739  | 1 | 6  | 0 | 0.129913   | 0          | 7  | 1 | 0.30102999 | 0.30102999 |
| chr7 | 103479678 | 103479737 | 60     | 1 | 7  | 0 | 0.20469099 | 0          | 7  | 1 | 0.20469099 | 0.30102999 |
| chr7 | 103479737 | 103664675 | 184939 | 5 | 6  | 0 | 0.129913   | 0          | 7  | 1 | 0.30102999 | 0.30102999 |
| chr7 | 103664675 | 103664734 | 60     | 1 | 7  | 0 | 0.20469099 | 0          | 7  | 1 | 0.20469099 | 0.30102999 |
| chr7 | 103664734 | 103767027 | 102294 | 2 | 6  | 0 | 0.129913   | 0          | 7  | 1 | 0.30102999 | 0.30102999 |
| chr7 | 103767027 | 103767086 | 60     | 1 | 7  | 0 | 0.20469099 | 0          | 7  | 1 | 0.20469099 | 0.30102999 |
| chr7 | 103767086 | 103835708 | 68623  | 2 | 6  | 0 | 0.129913   | 0          | 7  | 1 | 0.30102999 | 0.30102999 |
| chr7 | 103835708 | 103947715 | 112008 | 2 | 6  | 0 | 0.129913   | 0          | 7  | 0 | 0.30102999 | 0          |
| chr7 | 103947715 | 103997140 | 49426  | 2 | 7  | 0 | 0.20469099 | 0          | 7  | 1 | 0.20469099 | 0.30102999 |
| chr7 | 103997140 | 103997199 | 60     | 1 | 9  | 0 | 0.42015402 | 0          | 7  | 1 | 0.08584816 | 0.30102999 |
| chr7 | 103997199 | 104051443 | 54245  | 1 | 9  | 0 | 0.42015402 | 0          | 7  | 0 | 0.08584816 | 0          |
| chr7 | 104051443 | 104100018 | 48576  | 2 | 9  | 0 | 0.20975986 | 0          | 9  | 0 | 0.20975986 | 0          |
| chr7 | 104100018 | 104130970 | 30953  | 1 | 9  | 0 | 0.30102999 | 0          | 8  | 0 | 0.13872638 | 0          |
| chr7 | 104130970 | 104179715 | 48746  | 1 | 7  | 0 | 0.20469099 | 0          | 7  | 0 | 0.20469099 | 0          |
| chr7 | 104179715 | 104241701 | 61987  | 2 | 7  | 0 | 0.13499366 | 0          | 8  | 0 | 0.30102999 | 0          |
| chr7 | 104241701 | 104284479 | 42779  | 2 | 7  | 0 | 0.05232577 | 0          | 10 | 0 | 0.56314362 | 0          |
| chr7 | 104284479 | 104380817 | 96339  | 2 | 7  | 0 | 0.08584816 | 0          | 9  | 0 | 0.42015402 | 0          |
| chr7 | 104380817 | 104477768 | 96952  | 2 | 6  | 0 | 0.08122616 | 0          | 8  | 0 | 0.4250187  | 0          |
| chr7 | 104477768 | 104477827 | 60     | 1 | 7  | 0 | 0.08584816 | 0          | 9  | 0 | 0.42015402 | 0          |
| chr7 | 104477827 | 104558966 | 81140  | 2 | 6  | 0 | 0.08122616 | 0          | 8  | 0 | 0.4250187  | 0          |
| chr7 | 104558966 | 104657247 | 98282  | 3 | 6  | 0 | 0.129913   | 0          | 7  | 0 | 0.30102999 | 0          |
| chr7 | 104657247 | 104730300 | 73054  | 2 | 6  | 0 | 0.08122616 | 0          | 8  | 0 | 0.4250187  | 0          |
| chr7 | 104730300 | 104765232 | 34933  | 2 | 6  | 0 | 0.08122616 | 0          | 8  | 1 | 0.4250187  | 0.30102999 |
| chr7 | 104765232 | 104861250 | 96019  | 2 | 6  | 0 | 0.08122616 | 0          | 8  | 0 | 0.4250187  | 0          |
| chr7 | 104861250 | 105044594 | 183345 | 5 | 7  | 0 | 0.13499366 | 0          | 8  | 0 | 0.30102999 | 0          |
| chr7 | 105044594 | 105044653 | 60     | 1 | 8  | 0 | 0.20764654 | 0          | 8  | 0 | 0.20764654 | 0          |
| chr7 | 105044653 | 105177121 | 132469 | 3 | 7  | 0 | 0.13499366 | 0          | 8  | 0 | 0.30102999 | 0          |
| chr7 | 105177121 | 105303894 | 126774 | 4 | 6  | 0 | 0.08122616 | 0          | 8  | 0 | 0.4250187  | 0          |
| chr7 | 105303894 | 105465969 | 162076 | 3 | 5  | 0 | 0.07511598 | 0          | 7  | 0 | 0.43181735 | 0          |
| chr7 | 105465969 | 105466028 | 60     | 1 | 5  | 0 | 0.04407651 | 0          | 8  | 0 | 0.58747015 | 0          |
| chr7 | 105466028 | 105549271 | 83244  | 3 | 5  | 0 | 0.07511598 | 0          | 7  | 0 | 0.43181735 | 0          |
| chr7 | 105549271 | 105549330 | 60     | 1 | 5  | 0 | 0.04407651 | 0          | 8  | 1 | 0.58747015 | 0.30102999 |
| chr7 | 105549330 | 105642012 | 92683  | 2 | 5  | 0 | 0.12309572 | 0          | 6  | 0 | 0.30102999 | 0          |
| chr7 | 105642012 | 105673543 | 31532  | 2 | 5  | 0 | 0.07511598 | 0          | 7  | 1 | 0.43181735 | 0.30102999 |
| chr7 | 105673543 | 105747316 | 73774  | 1 | 5  | 0 | 0.07511598 | 0          | 7  | 0 | 0.43181735 | 0          |
| chr7 | 105747316 | 105747375 | 60     | 1 | 5  | 0 | 0.02473314 | 0          | 9  | 0 | 0.76806864 | 0          |
| chr7 | 105747375 | 105796199 | 48825  | 1 | 5  | 0 | 0.04407651 | 0          | 8  | 0 | 0.         |            |

|      |           |           |        |    |   |   |            |   |   |   |            |   |
|------|-----------|-----------|--------|----|---|---|------------|---|---|---|------------|---|
| chr7 | 108321116 | 108440818 | 119703 | 2  | 4 | 0 | 0.18734596 | 0 | 4 | 0 | 0.18734596 | 0 |
| chr7 | 108440818 | 108526931 | 86114  | 3  | 4 | 0 | 0.11390336 | 0 | 5 | 0 | 0.30102999 | 0 |
| chr7 | 108526931 | 108596565 | 69635  | 2  | 5 | 0 | 0.19510895 | 0 | 5 | 0 | 0.19510895 | 0 |
| chr7 | 108596565 | 108672760 | 76196  | 1  | 4 | 0 | 0.11390336 | 0 | 5 | 0 | 0.30102999 | 0 |
| chr7 | 108672760 | 108717625 | 44866  | 1  | 3 | 0 | 0.05670724 | 0 | 5 | 0 | 0.45545077 | 0 |
| chr7 | 108717625 | 108876280 | 158656 | 3  | 3 | 0 | 0.10122019 | 0 | 4 | 0 | 0.30102999 | 0 |
| chr7 | 108876280 | 108876339 | 60     | 1  | 3 | 0 | 0.05670724 | 0 | 5 | 0 | 0.45545077 | 0 |
| chr7 | 108876339 | 108931936 | 55598  | 1  | 3 | 0 | 0.10122019 | 0 | 4 | 0 | 0.30102999 | 0 |
| chr7 | 108931936 | 109105351 | 173416 | 3  | 3 | 0 | 0.17593012 | 0 | 3 | 0 | 0.17593012 | 0 |
| chr7 | 109105351 | 109105410 | 60     | 1  | 3 | 0 | 0.05670724 | 0 | 5 | 0 | 0.45545077 | 0 |
| chr7 | 109105410 | 109173035 | 67626  | 2  | 3 | 0 | 0.10122019 | 0 | 4 | 0 | 0.30102999 | 0 |
| chr7 | 109173035 | 109211744 | 38710  | 1  | 2 | 0 | 0.0429175  | 0 | 4 | 0 | 0.47744371 | 0 |
| chr7 | 109211744 | 109319033 | 107290 | 2  | 1 | 0 | 0.01091641 | 0 | 4 | 0 | 0.76005302 | 0 |
| chr7 | 109319033 | 109319092 | 60     | 1  | 2 | 0 | 0.0429175  | 0 | 4 | 0 | 0.47744371 | 0 |
| chr7 | 109319092 | 109483610 | 164519 | 3  | 1 | 0 | 0.01091641 | 0 | 4 | 0 | 0.76005302 | 0 |
| chr7 | 109483610 | 109612590 | 128981 | 4  | 3 | 0 | 0.10122019 | 0 | 4 | 0 | 0.30102999 | 0 |
| chr7 | 109612590 | 109689563 | 76974  | 3  | 4 | 0 | 0.18734596 | 0 | 4 | 0 | 0.18734596 | 0 |
| chr7 | 109689563 | 109850636 | 161074 | 3  | 3 | 0 | 0.10122019 | 0 | 4 | 0 | 0.30102999 | 0 |
| chr7 | 109850636 | 109850695 | 60     | 1  | 4 | 0 | 0.18734596 | 0 | 4 | 0 | 0.18734596 | 0 |
| chr7 | 109850695 | 109889643 | 38951  | 1  | 3 | 0 | 0.10122019 | 0 | 4 | 0 | 0.30102999 | 0 |
| chr7 | 109889643 | 110187166 | 29722  | 6  | 3 | 0 | 0.17593012 | 0 | 3 | 0 | 0.17593012 | 0 |
| chr7 | 110187166 | 110276505 | 86340  | 3  | 3 | 0 | 0.10122019 | 0 | 4 | 0 | 0.30102999 | 0 |
| chr7 | 110276505 | 110602839 | 326335 | 8  | 5 | 0 | 0.30102999 | 0 | 4 | 0 | 0.11390336 | 0 |
| chr7 | 110602839 | 110602898 | 60     | 1  | 5 | 0 | 0.19510895 | 0 | 5 | 0 | 0.19510895 | 0 |
| chr7 | 110602898 | 110674867 | 71970  | 1  | 5 | 0 | 0.30102999 | 0 | 4 | 0 | 0.11390336 | 0 |
| chr7 | 110674867 | 110731344 | 56478  | 2  | 5 | 0 | 0.45545077 | 0 | 3 | 0 | 0.05670724 | 0 |
| chr7 | 110731344 | 110731403 | 60     | 1  | 5 | 0 | 0.30102999 | 0 | 4 | 0 | 0.11390336 | 0 |
| chr7 | 110731403 | 110767384 | 35982  | 1  | 5 | 0 | 0.45545077 | 0 | 3 | 0 | 0.05670724 | 0 |
| chr7 | 110767384 | 110767443 | 60     | 1  | 5 | 0 | 0.30102999 | 0 | 4 | 0 | 0.11390336 | 0 |
| chr7 | 110767443 | 110839892 | 72450  | 2  | 5 | 0 | 0.45545077 | 0 | 3 | 0 | 0.05670724 | 0 |
| chr7 | 110839892 | 110904950 | 65059  | 1  | 5 | 0 | 0.68214471 | 0 | 2 | 0 | 0.02162467 | 0 |
| chr7 | 110904950 | 111105151 | 200202 | 4  | 5 | 0 | 0.45545077 | 0 | 3 | 0 | 0.05670724 | 0 |
| chr7 | 111105151 | 111130599 | 25449  | 2  | 6 | 0 | 0.63695542 | 0 | 3 | 0 | 0.03070643 | 0 |
| chr7 | 111130599 | 111149166 | 18568  | 2  | 6 | 0 | 0.44141547 | 0 | 4 | 0 | 0.06713722 | 0 |
| chr7 | 111149166 | 111202026 | 52861  | 1  | 5 | 0 | 0.45545077 | 0 | 3 | 0 | 0.05670724 | 0 |
| chr7 | 111202026 | 111274604 | 72579  | 2  | 4 | 0 | 0.30102999 | 0 | 3 | 0 | 0.10122019 | 0 |
| chr7 | 111274604 | 111304031 | 29428  | 2  | 4 | 0 | 0.11390336 | 0 | 5 | 0 | 0.30102999 | 0 |
| chr7 | 111304031 | 111366863 | 62833  | 1  | 4 | 0 | 0.18734596 | 0 | 4 | 0 | 0.18734596 | 0 |
| chr7 | 111366863 | 111474710 | 107848 | 2  | 3 | 0 | 0.10122019 | 0 | 4 | 0 | 0.30102999 | 0 |
| chr7 | 111474710 | 111503892 | 29183  | 2  | 5 | 0 | 0.19510895 | 0 | 5 | 0 | 0.19510895 | 0 |
| chr7 | 111503892 | 111580210 | 76319  | 1  | 3 | 0 | 0.05670724 | 0 | 5 | 0 | 0.45545077 | 0 |
| chr7 | 111580210 | 111613396 | 33187  | 3  | 3 | 0 | 0.10122019 | 0 | 4 | 0 | 0.30102999 | 0 |
| chr7 | 111613396 | 111647224 | 33829  | 2  | 4 | 0 | 0.18734596 | 0 | 4 | 0 | 0.18734596 | 0 |
| chr7 | 111647224 | 111647283 | 60     | 1  | 4 | 0 | 0.06713722 | 0 | 6 | 0 | 0.44141547 | 0 |
| chr7 | 111647283 | 111741420 | 94138  | 2  | 4 | 0 | 0.18734596 | 0 | 4 | 0 | 0.18734596 | 0 |
| chr7 | 111741420 | 111741479 | 60     | 1  | 5 | 0 | 0.19510895 | 0 | 5 | 0 | 0.19510895 | 0 |
| chr7 | 111741479 | 111840999 | 99521  | 2  | 4 | 0 | 0.18734596 | 0 | 4 | 0 | 0.18734596 | 0 |
| chr7 | 111840999 | 112095843 | 254845 | 8  | 4 | 0 | 0.06713722 | 0 | 6 | 0 | 0.44141547 | 0 |
| chr7 | 112095843 | 112095902 | 60     | 1  | 5 | 0 | 0.12309572 | 0 | 6 | 0 | 0.30102999 | 0 |
| chr7 | 112095902 | 112124983 | 29082  | 1  | 3 | 0 | 0.05670724 | 0 | 5 | 0 | 0.45545077 | 0 |
| chr7 | 112124983 | 112211255 | 86273  | 2  | 2 | 0 | 0.0429175  | 0 | 4 | 0 | 0.47744371 | 0 |
| chr7 | 112211255 | 112320660 | 109406 | 2  | 2 | 0 | 0.08289318 | 0 | 3 | 0 | 0.30102999 | 0 |
| chr7 | 112320660 | 112378119 | 57460  | 2  | 2 | 0 | 0.0429175  | 0 | 4 | 0 | 0.47744371 | 0 |
| chr7 | 112378119 | 112409979 | 31861  | 2  | 2 | 0 | 0.02162467 | 0 | 5 | 0 | 0.68214471 | 0 |
| chr7 | 112409979 | 112459365 | 49387  | 2  | 2 | 0 | 0.01053319 | 0 | 6 | 0 | 0.91219088 | 0 |
| chr7 | 112459365 | 112494208 | 34844  | 1  | 2 | 0 | 0.0429175  | 0 | 4 | 0 | 0.47744371 | 0 |
| chr7 | 112494208 | 112494267 | 60     | 1  | 3 | 0 | 0.10122019 | 0 | 4 | 0 | 0.30102999 | 0 |
| chr7 | 112494267 | 112683880 | 189614 | 4  | 2 | 0 | 0.1575501  | 0 | 2 | 0 | 0.1575501  | 0 |
| chr7 | 112683880 | 112979837 | 295958 | 7  | 2 | 0 | 0.08289318 | 0 | 3 | 0 | 0.30102999 | 0 |
| chr7 | 112979837 | 113282818 | 302982 | 7  | 3 | 0 | 0.17593012 | 0 | 3 | 0 | 0.17593012 | 0 |
| chr7 | 113282818 | 113338567 | 55750  | 1  | 2 | 0 | 0.08289318 | 0 | 3 | 0 | 0.30102999 | 0 |
| chr7 | 113338567 | 113391485 | 52919  | 2  | 3 | 0 | 0.17593012 | 0 | 3 | 0 | 0.17593012 | 0 |
| chr7 | 113391485 | 113429675 | 38191  | 2  | 4 | 0 | 0.30102999 | 0 | 3 | 0 | 0.10122019 | 0 |
| chr7 | 113429675 | 113558493 | 128819 | 6  | 4 | 0 | 0.18734596 | 0 | 4 | 0 | 0.18734596 | 0 |
| chr7 | 113558493 | 113712256 | 153719 | 3  | 3 | 0 | 0.10122019 | 0 | 4 | 0 | 0.30102999 | 0 |
| chr7 | 113712256 | 113885474 | 173219 | 5  | 3 | 0 | 0.05670724 | 0 | 5 | 0 | 0.45545077 | 0 |
| chr7 | 113885474 | 113885533 | 60     | 1  | 4 | 0 | 0.11390336 | 0 | 5 | 0 | 0.30102999 | 0 |
| chr7 | 113885533 | 114385008 | 499476 | 12 | 4 | 0 | 0.18734596 | 0 | 4 | 0 | 0.18734596 | 0 |
| chr7 | 114385008 | 114474569 | 89562  | 4  | 4 | 0 | 0.30102999 | 0 | 4 | 0 | 0.11390336 | 0 |
| chr7 | 114474569 | 114577454 | 102886 | 4  | 4 | 0 | 0.18734596 | 0 | 4 | 0 | 0.18734596 | 0 |
| chr7 | 114577454 | 114899975 | 325222 | 8  | 5 | 0 | 0.19510895 | 0 | 5 | 0 | 0.19510895 | 0 |
| chr7 | 114899975 | 114900034 | 60     | 1  | 5 | 0 | 0.12309572 | 0 | 6 | 0 | 0.30102999 | 0 |
| chr7 | 114900034 | 115038104 | 138071 | 2  | 4 | 0 | 0.06713722 | 0 | 6 | 0 | 0.44141547 | 0 |
| chr7 | 115038104 | 115099128 | 61025  | 2  | 5 | 0 | 0.12309572 | 0 | 6 | 0 | 0.30102999 | 0 |
| chr7 | 115099128 | 115147607 | 48480  | 1  | 4 | 0 | 0.06713722 | 0 | 6 | 0 | 0.44141547 | 0 |
| chr7 | 115147607 | 115243213 | 95607  | 3  | 4 | 0 | 0.03812622 | 0 | 7 | 0 | 0.60763643 | 0 |
| chr7 | 115243213 | 115319336 | 76124  | 2  | 4 | 0 | 0.06713722 | 0 | 6 | 0 | 0.44141547 | 0 |
| chr7 | 115319336 | 115479345 | 160010 | 4  | 5 | 0 | 0.07511598 | 0 | 7 | 0 | 0.43181735 | 0 |
| chr7 | 115479345 | 115581915 | 102571 | 2  | 4 | 0 | 0.03812622 | 0 | 7 | 0 | 0.60763643 | 0 |
| chr7 | 115581915 | 115670743 | 88829  | 3  | 4 | 0 | 0.02074938 | 0 | 8 | 0 | 0.79906872 | 0 |
| chr7 | 115670743 | 115775118 | 104376 | 2  | 4 | 0 | 0.03812622 | 0 | 7 | 0 | 0.60763643 | 0 |
| chr7 | 115775118 | 115898680 | 123563 | 3  | 4 | 0 | 0.02074938 | 0 | 8 | 0 | 0.79906872 | 0 |
| chr7 | 115898680 | 116060004 | 161325 | 3  | 4 | 0 | 0.03812622 | 0 | 7 | 0 | 0.60763643 | 0 |
| chr7 | 116060004 | 116625128 | 565125 | 20 | 4 | 0 | 0.02074938 | 0 | 8 | 0 | 0.79906872 | 0 |
| chr7 | 116625128 | 116692089 | 66962  | 2  | 4 | 0 | 0.06713722 | 0 | 6 | 0 | 0.44141547 | 0 |
| chr7 | 116692089 | 116692148 | 60     | 1  | 4 | 0 | 0.07511598 | 0 | 7 | 0 | 0.43181735 | 0 |
| chr7 | 116692148 | 116870046 | 177899 | 5  | 4 | 0 | 0.03812622 | 0 | 7 | 0 | 0.60763643 | 0 |
| chr7 | 116870046 | 117114170 | 244125 | 8  | 4 | 0 | 0.06713722 | 0 | 6 | 0 | 0.44141547 | 0 |
| chr7 | 117114170 | 117581083 | 466914 | 11 | 3 | 0 | 0.03070643 | 0 | 6 | 0 | 0.63695542 | 0 |
| chr7 | 117581083 | 117581142 | 60     | 1  | 4 | 0 | 0.03812622 | 0 | 7 | 0 | 0.60763643 | 0 |
| chr7 | 117581142 | 117701929 | 120788 | 3  | 3 | 0 | 0.01598258 | 0 | 7 | 0 | 0.84395715 | 0 |
| chr7 | 117701929 | 117701988 | 60     | 1  | 4 | 0 | 0.03812622 | 0 | 7 | 0 | 0.60763643 | 0 |
| chr7 | 117701988 | 117825700 | 123713 | 2  | 4 | 0 | 0.06713722 | 0 | 6 | 0 | 0.44141547 | 0 |
| chr7 | 117825700 | 117916326 | 90627  | 4  | 4 | 0 | 0.03812622 | 0 | 7 | 0 | 0.60763643 | 0 |
| chr7 | 117916326 | 118349222 | 432897 | 9  | 4 | 0 | 0.06713722 | 0 | 6 | 0 | 0.44141547 | 0 |
| chr7 | 118349222 | 118467051 | 117830 | 3  | 4 | 0 | 0.18734596 | 0 | 4 | 0 | 0.18734596 | 0 |
| chr7 | 118467051 | 118538355 | 71305  | 2  | 4 | 0 | 0.11390336 | 0 | 5 | 0 | 0.30102999 | 0 |
| chr7 | 118538355 | 118640924 | 102570 | 3  | 4 | 0 | 0.18734596 | 0 | 4 | 0 | 0.18734596 | 0 |
| chr7 | 118640924 | 118773037 | 132114 | 2  | 3 | 0 | 0.10122019 | 0 | 4 | 0 | 0.30102999 | 0 |
| chr7 | 118773037 | 118773096 | 60     | 1  | 3 | 0 | 0.05670724 | 0 | 5 | 0 | 0.45545077 | 0 |
| chr7 | 118773096 | 118866671 | 93576  | 2  | 3 | 0 | 0.10122019 | 0 | 4 | 0 | 0.30102999 | 0 |
| chr7 | 118866671 | 118866730 | 60</   |    |   |   |            |   |   |   |            |   |



|      |           |           |        |    |   |   |            |            |   |   |            |            |
|------|-----------|-----------|--------|----|---|---|------------|------------|---|---|------------|------------|
| chr7 | 120581132 | 120673969 | 92838  | 3  | 3 | 0 | 0.05670724 | 0          | 5 | 0 | 0.4554077  | 0          |
| chr7 | 120673969 | 120674028 | 60     | 1  | 4 | 0 | 0.11390336 | 0          | 5 | 0 | 0.30102999 | 0          |
| chr7 | 120674028 | 120780926 | 106899 | 3  | 3 | 0 | 0.05670724 | 0          | 5 | 0 | 0.4554077  | 0          |
| chr7 | 120780926 | 120901907 | 120982 | 2  | 2 | 0 | 0.02162467 | 0          | 5 | 0 | 0.68214471 | 0          |
| chr7 | 120901907 | 120901966 | 60     | 1  | 3 | 0 | 0.05670724 | 0          | 5 | 0 | 0.4554077  | 0          |
| chr7 | 120901966 | 120980577 | 96092  | 2  | 2 | 0 | 0.02162467 | 0          | 5 | 0 | 0.68214471 | 0          |
| chr7 | 120980577 | 120998116 | 60     | 1  | 2 | 0 | 0.01053198 | 0          | 6 | 0 | 0.91219088 | 0          |
| chr7 | 120998116 | 121101368 | 103253 | 3  | 2 | 0 | 0.02162467 | 0          | 5 | 0 | 0.68214471 | 0          |
| chr7 | 121101368 | 121347421 | 246054 | 6  | 2 | 0 | 0.01053198 | 0          | 6 | 0 | 0.91219088 | 0          |
| chr7 | 121347421 | 121381748 | 34328  | 2  | 4 | 0 | 0.03812622 | 0          | 7 | 0 | 0.60763643 | 0          |
| chr7 | 121381748 | 121512486 | 130739 | 3  | 3 | 0 | 0.03070643 | 0          | 6 | 0 | 0.63695542 | 0          |
| chr7 | 121512486 | 121652294 | 139809 | 5  | 3 | 0 | 0.01598258 | 0          | 7 | 0 | 0.84395715 | 0          |
| chr7 | 121652294 | 121701346 | 49053  | 2  | 5 | 0 | 0.07511598 | 0          | 7 | 0 | 0.43181735 | 0          |
| chr7 | 121701346 | 121758401 | 57056  | 2  | 6 | 0 | 0.08122616 | 0          | 8 | 0 | 0.4250187  | 0          |
| chr7 | 121758401 | 121809720 | 51320  | 2  | 6 | 0 | 0.129913   | 0          | 7 | 0 | 0.30102999 | 0          |
| chr7 | 121809720 | 121959920 | 150201 | 3  | 5 | 0 | 0.07511598 | 0          | 7 | 0 | 0.43181735 | 0          |
| chr7 | 121959920 | 121959979 | 60     | 1  | 6 | 0 | 0.129913   | 0          | 7 | 0 | 0.30102999 | 0          |
| chr7 | 121959979 | 122091427 | 131449 | 3  | 5 | 0 | 0.07511598 | 0          | 7 | 0 | 0.43181735 | 0          |
| chr7 | 122091427 | 122091486 | 60     | 1  | 7 | 0 | 0.20469099 | 0          | 7 | 0 | 0.20469099 | 0          |
| chr7 | 122091486 | 122161350 | 69865  | 1  | 6 | 0 | 0.129913   | 0          | 7 | 0 | 0.30102999 | 0          |
| chr7 | 122161350 | 122242796 | 81437  | 2  | 6 | 0 | 0.20064824 | 0          | 6 | 0 | 0.20064824 | 0          |
| chr7 | 122242796 | 122326642 | 48845  | 2  | 7 | 0 | 0.30102999 | 0          | 6 | 0 | 0.129913   | 0          |
| chr7 | 122326642 | 122412493 | 120864 | 5  | 6 | 0 | 0.20064824 | 0          | 6 | 0 | 0.20064824 | 0          |
| chr7 | 122412493 | 122453614 | 41122  | 2  | 6 | 0 | 0.129913   | 0          | 7 | 0 | 0.30102999 | 0          |
| chr7 | 122453614 | 122787185 | 333572 | 9  | 5 | 0 | 0.12309572 | 0          | 6 | 0 | 0.30102999 | 0          |
| chr7 | 122787185 | 122879594 | 92410  | 2  | 6 | 0 | 0.20064824 | 0          | 6 | 0 | 0.20064824 | 0          |
| chr7 | 122879594 | 122986200 | 106607 | 3  | 7 | 0 | 0.30102999 | 0          | 6 | 0 | 0.129913   | 0          |
| chr7 | 122986200 | 122986259 | 60     | 1  | 8 | 0 | 0.30102999 | 0          | 7 | 0 | 0.13499366 | 0          |
| chr7 | 122986259 | 123047169 | 60911  | 1  | 7 | 0 | 0.30102999 | 0          | 6 | 0 | 0.129913   | 0          |
| chr7 | 123047169 | 123047228 | 60     | 1  | 7 | 0 | 0.20469099 | 0          | 7 | 0 | 0.20469099 | 0          |
| chr7 | 123047228 | 123092563 | 45336  | 1  | 5 | 0 | 0.12309572 | 0          | 6 | 0 | 0.30102999 | 0          |
| chr7 | 123092563 | 123142667 | 50105  | 2  | 5 | 0 | 0.07511598 | 0          | 7 | 0 | 0.43181735 | 0          |
| chr7 | 123142667 | 123142726 | 60     | 1  | 7 | 0 | 0.08584816 | 0          | 9 | 0 | 0.42015402 | 0          |
| chr7 | 123142726 | 123235242 | 92517  | 2  | 6 | 0 | 0.20064824 | 0          | 6 | 0 | 0.20064824 | 0          |
| chr7 | 123235242 | 123266642 | 31401  | 2  | 6 | 0 | 0.129913   | 0          | 7 | 0 | 0.30102999 | 0          |
| chr7 | 123266642 | 123266701 | 60     | 1  | 6 | 0 | 0.08122616 | 0          | 8 | 0 | 0.4250187  | 0          |
| chr7 | 123266701 | 123384451 | 117751 | 2  | 6 | 0 | 0.20064824 | 0          | 6 | 0 | 0.20064824 | 0          |
| chr7 | 123384451 | 123488183 | 103733 | 3  | 6 | 0 | 0.129913   | 0          | 7 | 0 | 0.30102999 | 0          |
| chr7 | 123488183 | 123550345 | 62163  | 2  | 6 | 0 | 0.20064824 | 0          | 6 | 0 | 0.20064824 | 0          |
| chr7 | 123550345 | 123627320 | 76976  | 2  | 5 | 0 | 0.12309572 | 0          | 6 | 0 | 0.30102999 | 0          |
| chr7 | 123627320 | 123627379 | 60     | 1  | 6 | 0 | 0.20064824 | 0          | 6 | 0 | 0.20064824 | 0          |
| chr7 | 123627379 | 123710958 | 83580  | 2  | 4 | 0 | 0.18734596 | 0          | 4 | 0 | 0.18734596 | 0          |
| chr7 | 123710958 | 123711017 | 60     | 1  | 5 | 0 | 0.12309572 | 0          | 6 | 0 | 0.30102999 | 0          |
| chr7 | 123711017 | 123840714 | 129698 | 3  | 4 | 0 | 0.18734596 | 0          | 4 | 0 | 0.18734596 | 0          |
| chr7 | 123840714 | 123840773 | 60     | 1  | 4 | 0 | 0.11390336 | 0          | 5 | 0 | 0.30102999 | 0          |
| chr7 | 123840773 | 123911816 | 71044  | 1  | 3 | 0 | 0.05670724 | 0          | 5 | 0 | 0.4554077  | 0          |
| chr7 | 123911816 | 123952516 | 40701  | 2  | 4 | 0 | 0.11390336 | 0          | 5 | 0 | 0.30102999 | 0          |
| chr7 | 123952516 | 124136443 | 183928 | 4  | 2 | 0 | 0.02162467 | 0          | 5 | 0 | 0.68214471 | 0          |
| chr7 | 124136443 | 124136502 | 60     | 1  | 3 | 0 | 0.05670724 | 0          | 5 | 0 | 0.4554077  | 0          |
| chr7 | 124136502 | 124568925 | 432424 | 11 | 3 | 0 | 0.10122019 | 0          | 4 | 0 | 0.30102999 | 0          |
| chr7 | 124568925 | 124607233 | 38309  | 1  | 3 | 0 | 0.17593012 | 0          | 3 | 0 | 0.17593012 | 0          |
| chr7 | 124607233 | 124607292 | 60     | 1  | 4 | 0 | 0.30102999 | 0          | 3 | 0 | 0.10122019 | 0          |
| chr7 | 124607292 | 124671238 | 63947  | 1  | 2 | 0 | 0.0828918  | 0          | 3 | 0 | 0.30102999 | 0          |
| chr7 | 124671238 | 124695381 | 24144  | 2  | 2 | 0 | 0.0429175  | 0          | 4 | 0 | 0.47744371 | 0          |
| chr7 | 124695381 | 124968066 | 272686 | 5  | 2 | 0 | 0.0828918  | 0          | 3 | 0 | 0.30102999 | 0          |
| chr7 | 124968066 | 124968125 | 60     | 1  | 2 | 0 | 0.0429175  | 0          | 4 | 0 | 0.47744371 | 0          |
| chr7 | 124968125 | 125533178 | 565054 | 11 | 2 | 0 | 0.0828918  | 0          | 3 | 0 | 0.30102999 | 0          |
| chr7 | 125533178 | 125533237 | 60     | 1  | 3 | 0 | 0.17593012 | 0          | 3 | 0 | 0.17593012 | 0          |
| chr7 | 125533237 | 125610054 | 76818  | 2  | 2 | 0 | 0.0828918  | 0          | 3 | 0 | 0.30102999 | 0          |
| chr7 | 125610054 | 126025603 | 415550 | 9  | 3 | 0 | 0.17593012 | 0          | 3 | 0 | 0.17593012 | 0          |
| chr7 | 126025603 | 126199642 | 174040 | 3  | 5 | 0 | 0.4554077  | 0          | 3 | 0 | 0.05670724 | 0          |
| chr7 | 126199642 | 126363805 | 164164 | 3  | 4 | 0 | 0.30102999 | 0          | 3 | 0 | 0.10122019 | 0          |
| chr7 | 126363805 | 126711483 | 347679 | 10 | 5 | 0 | 0.4554077  | 0          | 3 | 0 | 0.05670724 | 0          |
| chr7 | 126711483 | 126832119 | 120637 | 2  | 5 | 0 | 0.68214471 | 0          | 2 | 0 | 0.02162467 | 0          |
| chr7 | 126832119 | 126882726 | 50608  | 2  | 5 | 0 | 0.4554077  | 0          | 3 | 0 | 0.05670724 | 0          |
| chr7 | 126882726 | 126924177 | 38752  | 2  | 5 | 0 | 0.4554077  | 0          | 3 | 1 | 0.05670724 | 0.30102999 |
| chr7 | 126924177 | 126961130 | 39654  | 1  | 4 | 0 | 0.30102999 | 0          | 3 | 1 | 0.10122019 | 0.30102999 |
| chr7 | 126961130 | 127023981 | 62852  | 3  | 4 | 0 | 0.30102999 | 0          | 3 | 2 | 0.10122019 | 0.61140001 |
| chr7 | 127023981 | 127103527 | 79547  | 3  | 4 | 0 | 0.18734596 | 0          | 4 | 2 | 0.18734596 | 0.61140001 |
| chr7 | 127103527 | 127167239 | 63713  | 1  | 4 | 0 | 0.30102999 | 0          | 3 | 2 | 0.10122019 | 0.61140001 |
| chr7 | 127167239 | 127254746 | 87508  | 4  | 4 | 0 | 0.47744371 | 0          | 2 | 2 | 0.0429175  | 0.61140001 |
| chr7 | 127254746 | 127287308 | 32563  | 2  | 5 | 0 | 0.4554077  | 0          | 3 | 2 | 0.05670724 | 0.61140001 |
| chr7 | 127287308 | 127341251 | 53944  | 1  | 4 | 0 | 0.30102999 | 0          | 3 | 2 | 0.10122019 | 0.61140001 |
| chr7 | 127341251 | 127447514 | 106264 | 2  | 4 | 0 | 0.47744371 | 0          | 2 | 2 | 0.0429175  | 0.61140001 |
| chr7 | 127447514 | 127506726 | 59213  | 2  | 4 | 0 | 0.30102999 | 0          | 3 | 2 | 0.10122019 | 0.61140001 |
| chr7 | 127506726 | 127569334 | 62609  | 2  | 5 | 0 | 0.4554077  | 0          | 3 | 2 | 0.05670724 | 0.61140001 |
| chr7 | 127569334 | 127569388 | 55     | 1  | 6 | 0 | 0.44141547 | 0          | 4 | 2 | 0.06713722 | 0.61140001 |
| chr7 | 127569388 | 127816572 | 247185 | 6  | 4 | 0 | 0.18734596 | 0          | 4 | 2 | 0.18734596 | 0.61140001 |
| chr7 | 127816572 | 127892164 | 75593  | 3  | 4 | 0 | 0.11390336 | 0          | 5 | 2 | 0.30102999 | 0.61140001 |
| chr7 | 127892164 | 128002386 | 110223 | 4  | 4 | 0 | 0.06713722 | 0          | 6 | 2 | 0.44141547 | 0.61140001 |
| chr7 | 128002386 | 128002445 | 60     | 1  | 5 | 0 | 0.12309572 | 0          | 6 | 2 | 0.30102999 | 0.61140001 |
| chr7 | 128002445 | 128187067 | 184623 | 4  | 5 | 0 | 0.19510895 | 0          | 5 | 2 | 0.19510895 | 0.61140001 |
| chr7 | 128187067 | 128187126 | 60     | 1  | 6 | 0 | 0.20064824 | 0          | 6 | 2 | 0.20064824 | 0.61140001 |
| chr7 | 128187126 | 128319733 | 132608 | 1  | 5 | 0 | 0.19510895 | 0          | 5 | 2 | 0.19510895 | 0.61140001 |
| chr7 | 128319733 | 128403716 | 83984  | 4  | 6 | 0 | 0.30102999 | 0          | 5 | 2 | 0.12309572 | 0.61140001 |
| chr7 | 128403716 | 128412897 | 9182   | 2  | 7 | 0 | 0.43181735 | 0          | 5 | 2 | 0.07511598 | 0.61140001 |
| chr7 | 128412897 | 128499016 | 86120  | 3  | 5 | 0 | 0.19510895 | 0          | 5 | 2 | 0.19510895 | 0.61140001 |
| chr7 | 128499016 | 128504637 | 5622   | 2  | 7 | 1 | 0.43181735 | 0.05404976 | 5 | 2 | 0.07511598 | 0.30102999 |
| chr7 | 128504637 | 128640881 | 136245 | 3  | 6 | 1 | 0.30102999 | 0.05404976 | 5 | 2 | 0.12309572 | 0.30102999 |
| chr7 | 128640881 | 128680847 | 39967  | 2  | 6 | 1 | 0.20064824 | 0.05404976 | 6 | 2 | 0.20064824 | 0.30102999 |
| chr7 | 128680847 | 128680906 | 60     | 1  | 6 | 1 | 0.129913   | 0.05404976 | 7 | 2 | 0.30102999 | 0.30102999 |
| chr7 | 128680906 | 128711683 | 30778  | 1  | 6 | 1 | 0.20064824 | 0.05404976 | 6 | 2 | 0.20064824 | 0.30102999 |
| chr7 | 128711683 | 128803026 | 91344  | 2  | 4 | 1 | 0.06713722 | 0.05404976 | 6 | 2 | 0.44141547 | 0.30102999 |
| chr7 | 128803026 | 128803085 | 60     | 1  | 6 | 1 | 0.129913   | 0.05404976 | 7 | 2 | 0.30102999 | 0.30102999 |
| chr7 | 128803085 | 128837765 | 34681  | 1  | 4 | 1 | 0.03812622 | 0.05404976 | 7 | 2 | 0.60763643 | 0.30102999 |
| chr7 | 128837765 | 128890693 | 52929  | 2  | 4 | 1 | 0.06713722 | 0.05404976 | 6 | 2 | 0.44141547 | 0.30102999 |
| chr7 | 128890693 | 128936237 | 45545  | 1  | 4 | 1 | 0.06713722 | 0.1218695  | 6 | 1 | 0.44141547 | 0.1218695  |
| chr7 | 128936237 | 128996486 | 60250  | 1  | 4 | 1 | 0.06713722 | 0.30102999 | 6 | 0 | 0.44141547 | 0          |
| chr7 | 128996486 | 129045658 | 49173  | 2  | 6 | 1 | 0.20064824 |            |   |   |            |            |

|      |           |           |        |    |   |   |             |              |    |   |            |            |
|------|-----------|-----------|--------|----|---|---|-------------|--------------|----|---|------------|------------|
| chr7 | 13038057  | 13047791  | 39735  | 1  | 6 | 0 | 0.129913    | 0            | 7  | 0 | 0.30102999 | 0          |
| chr7 | 130347791 | 130354220 | 6430   | 2  | 6 | 0 | 0.08122616  | 0            | 8  | 0 | 0.4250187  | 0          |
| chr7 | 130354220 | 130417851 | 63632  | 3  | 6 | 0 | 0.04875589  | 0            | 9  | 0 | 0.5732208  | 0          |
| chr7 | 130417851 | 130458190 | 40340  | 2  | 6 | 0 | 0.01518174  | 0            | 11 | 0 | 0.9449689  | 0          |
| chr7 | 130458190 | 130458249 | 60     | 1  | 7 | 0 | 0.03037338  | 0            | 11 | 0 | 0.73110763 | 0          |
| chr7 | 130458249 | 130537984 | 79736  | 2  | 6 | 0 | 0.04875589  | 0            | 9  | 0 | 0.5732208  | 0          |
| chr7 | 130537984 | 130538043 | 60     | 1  | 7 | 0 | 0.03037338  | 0            | 11 | 0 | 0.73110763 | 0          |
| chr7 | 130538043 | 130572174 | 34132  | 1  | 7 | 0 | 0.08584816  | 0            | 9  | 0 | 0.42015402 | 0          |
| chr7 | 130572174 | 130593514 | 21341  | 1  | 6 | 0 | 0.04875589  | 0            | 9  | 0 | 0.5732208  | 0          |
| chr7 | 130593514 | 130712214 | 118701 | 3  | 6 | 0 | 0.08122616  | 0            | 8  | 0 | 0.4250187  | 0          |
| chr7 | 130712214 | 130849462 | 137249 | 5  | 6 | 0 | 0.04875589  | 0            | 9  | 0 | 0.5732208  | 0          |
| chr7 | 130849462 | 131023381 | 173920 | 5  | 7 | 0 | 0.08584816  | 0            | 9  | 0 | 0.42015402 | 0          |
| chr7 | 131023381 | 131084069 | 60689  | 1  | 7 | 0 | 0.13499366  | 0            | 8  | 0 | 0.30102999 | 0          |
| chr7 | 131084069 | 131120938 | 36870  | 2  | 7 | 0 | 0.08584816  | 0            | 9  | 0 | 0.42015402 | 0          |
| chr7 | 131120938 | 131120997 | 60     | 1  | 7 | 0 | 0.05232577  | 0            | 10 | 0 | 0.56314362 | 0          |
| chr7 | 131120997 | 131237966 | 116970 | 2  | 6 | 0 | 0.08122616  | 0            | 8  | 0 | 0.4250187  | 0          |
| chr7 | 131237966 | 131370007 | 132042 | 5  | 7 | 0 | 0.05232577  | 0            | 10 | 0 | 0.56314362 | 0          |
| chr7 | 131370007 | 131403218 | 33212  | 2  | 7 | 0 | 0.03037338  | 0            | 11 | 0 | 0.73110763 | 0          |
| chr7 | 131403218 | 131480152 | 76935  | 2  | 7 | 0 | 0.05232577  | 0            | 10 | 0 | 0.56314362 | 0          |
| chr7 | 131480152 | 131480211 | 60     | 1  | 8 | 0 | 0.05490675  | 0            | 11 | 0 | 0.53623409 | 0          |
| chr7 | 131480211 | 131577036 | 9626   | 2  | 7 | 0 | 0.03037338  | 0            | 11 | 0 | 0.73110763 | 0          |
| chr7 | 131577036 | 131707973 | 130938 | 3  | 7 | 0 | 0.05232577  | 0            | 10 | 0 | 0.56314362 | 0          |
| chr7 | 131707973 | 131827930 | 119948 | 3  | 7 | 0 | 0.13499366  | 0            | 8  | 0 | 0.30102999 | 0          |
| chr7 | 131827930 | 131827979 | 60     | 1  | 7 | 0 | 0.05232577  | 0            | 10 | 0 | 0.56314362 | 0          |
| chr7 | 131827979 | 131876810 | 48832  | 1  | 7 | 0 | 0.08584816  | 0            | 9  | 0 | 0.42015402 | 0          |
| chr7 | 131876810 | 131948767 | 71958  | 1  | 5 | 0 | 0.04407651  | 0            | 8  | 0 | 0.58747015 | 0          |
| chr7 | 131948767 | 131948826 | 60     | 1  | 6 | 0 | 0.08122616  | 0            | 8  | 1 | 0.4250187  | 0.30102999 |
| chr7 | 131948826 | 131984127 | 35302  | 1  | 5 | 0 | 0.04407651  | 0            | 8  | 1 | 0.58747015 | 0.30102999 |
| chr7 | 131984127 | 131984186 | 60     | 1  | 5 | 0 | 0.02473314  | 0            | 9  | 1 | 0.76806864 | 0.30102999 |
| chr7 | 131984186 | 132020408 | 36223  | 1  | 5 | 0 | 0.04407651  | 0            | 8  | 1 | 0.58747015 | 0.30102999 |
| chr7 | 132020408 | 132020467 | 60     | 1  | 5 | 0 | 0.02473314  | 0            | 9  | 1 | 0.76806864 | 0.30102999 |
| chr7 | 132020467 | 132059549 | 39083  | 1  | 5 | 0 | 0.04407651  | 0            | 8  | 1 | 0.58747015 | 0.30102999 |
| chr7 | 132059549 | 132059608 | 60     | 1  | 6 | 0 | 0.04875589  | 0            | 9  | 2 | 0.5732208  | 0.61140001 |
| chr7 | 132059608 | 132169510 | 109903 | 2  | 5 | 0 | 0.07511598  | 0            | 7  | 2 | 0.43181735 | 0.61140001 |
| chr7 | 132169510 | 132169569 | 60     | 1  | 6 | 0 | 0.129913    | 0            | 7  | 3 | 0.30102999 | 0.93173516 |
| chr7 | 132169569 | 132234470 | 64902  | 1  | 5 | 0 | 0.07511598  | 0            | 7  | 3 | 0.43181735 | 0.93173516 |
| chr7 | 132234470 | 132234529 | 60     | 1  | 5 | 0 | 0.04407651  | 0            | 8  | 3 | 0.58747015 | 0.93173516 |
| chr7 | 132234529 | 132281375 | 46847  | 1  | 4 | 0 | 0.02074938  | 0            | 8  | 2 | 0.79906872 | 0.61140001 |
| chr7 | 132281375 | 132281434 | 60     | 1  | 5 | 0 | 0.04407651  | 0            | 8  | 2 | 0.58747015 | 0.61140001 |
| chr7 | 132281434 | 132334303 | 52870  | 1  | 5 | 0 | 0.07511598  | 0            | 7  | 1 | 0.43181735 | 0.30102999 |
| chr7 | 132334303 | 132346241 | 11939  | 2  | 5 | 0 | 0.04407651  | 0            | 8  | 1 | 0.58747015 | 0.30102999 |
| chr7 | 132346241 | 132480379 | 134139 | 2  | 4 | 0 | 0.06713722  | 0            | 6  | 1 | 0.44141547 | 0.30102999 |
| chr7 | 132480379 | 132600441 | 120063 | 3  | 5 | 0 | 0.12309572  | 0            | 6  | 1 | 0.30102999 | 0.30102999 |
| chr7 | 132600441 | 132662185 | 61745  | 1  | 4 | 0 | 0.06713722  | 0            | 6  | 1 | 0.44141547 | 0.30102999 |
| chr7 | 132662185 | 133314916 | 652732 | 14 | 4 | 0 | 0.03812622  | 0            | 7  | 1 | 0.60763643 | 0.30102999 |
| chr7 | 133314916 | 133394713 | 79798  | 1  | 4 | 0 | 0.03812622  | 0            | 7  | 0 | 0.60763643 | 0          |
| chr7 | 133394713 | 133394772 | 60     | 1  | 4 | 0 | 0.02074938  | 0            | 8  | 0 | 0.79906872 | 0          |
| chr7 | 133394772 | 133602454 | 207683 | 5  | 4 | 0 | 0.03812622  | 0            | 7  | 0 | 0.60763643 | 0          |
| chr7 | 133602454 | 133788973 | 186520 | 5  | 4 | 0 | 0.02074938  | 0            | 8  | 0 | 0.79906872 | 0          |
| chr7 | 133788973 | 133933772 | 144800 | 3  | 4 | 0 | 0.06713722  | 0            | 6  | 0 | 0.44141547 | 0          |
| chr7 | 133933772 | 134063115 | 129344 | 6  | 4 | 0 | 0.03812622  | 0            | 7  | 0 | 0.60763643 | 0          |
| chr7 | 134063115 | 134104629 | 41515  | 2  | 4 | 1 | 0.03812622  | 0.30102999   | 7  | 0 | 0.60763643 | 0          |
| chr7 | 134104629 | 134202238 | 97610  | 3  | 4 | 1 | 0.02074938  | 0.30102999   | 8  | 0 | 0.79906872 | 0          |
| chr7 | 134202238 | 134332164 | 129927 | 3  | 5 | 1 | 0.02473314  | 0.30102999   | 9  | 0 | 0.76806864 | 0.30102999 |
| chr7 | 134332164 | 134564635 | 232472 | 7  | 6 | 1 | 0.04875589  | 0.30102999   | 9  | 0 | 0.5732208  | 0          |
| chr7 | 134564635 | 134702458 | 137824 | 3  | 6 | 1 | 0.08122616  | 0.30102999   | 8  | 0 | 0.4250187  | 0          |
| chr7 | 134702458 | 134784510 | 82053  | 1  | 5 | 1 | 0.04407651  | 0.30102999   | 8  | 0 | 0.58747015 | 0          |
| chr7 | 134784510 | 134853829 | 69220  | 3  | 4 | 1 | 0.02074938  | 0.30102999   | 8  | 0 | 0.79906872 | 0          |
| chr7 | 134853829 | 134923456 | 69628  | 3  | 4 | 1 | 0.03812622  | 0.30102999   | 7  | 0 | 0.60763643 | 0          |
| chr7 | 134923456 | 134968430 | 44975  | 2  | 5 | 1 | 0.07511598  | 0.30102999   | 7  | 0 | 0.43181735 | 0          |
| chr7 | 134968430 | 134968489 | 60     | 1  | 6 | 1 | 0.04875589  | 0.30102999   | 9  | 0 | 0.5732208  | 0          |
| chr7 | 134968489 | 134998314 | 29826  | 1  | 5 | 1 | 0.02473314  | 0.30102999   | 9  | 0 | 0.76806864 | 0          |
| chr7 | 134998314 | 135048841 | 50528  | 1  | 5 | 1 | 0.04407651  | 0.30102999   | 8  | 0 | 0.58747015 | 0          |
| chr7 | 135048841 | 135069843 | 21003  | 1  | 3 | 1 | 0.015398258 | 0.30102999   | 7  | 0 | 0.84395715 | 0          |
| chr7 | 135069843 | 135099056 | 29214  | 5  | 3 | 1 | 0.0079614   | 0.30102999   | 8  | 0 | 0.7648421  | 0          |
| chr7 | 135099056 | 135099115 | 60     | 1  | 4 | 1 | 0.02074938  | 0.30102999   | 8  | 0 | 0.79906872 | 0          |
| chr7 | 135099115 | 135165201 | 66087  | 1  | 4 | 1 | 0.03812622  | 0.30102999   | 7  | 0 | 0.60763643 | 0          |
| chr7 | 135165201 | 135165260 | 60     | 1  | 4 | 1 | 0.02074938  | 0.30102999   | 8  | 0 | 0.79906872 | 0          |
| chr7 | 135165260 | 135308257 | 142998 | 4  | 1 | 1 | 0.03812622  | 0.30102999   | 7  | 0 | 0.60763643 | 0          |
| chr7 | 135308257 | 135491891 | 183635 | 5  | 4 | 1 | 0.06713722  | 0.30102999   | 6  | 0 | 0.44141547 | 0          |
| chr7 | 135491891 | 135491950 | 60     | 1  | 4 | 1 | 0.03812622  | 0.30102999   | 7  | 0 | 0.60763643 | 0          |
| chr7 | 135491950 | 135739797 | 247848 | 8  | 4 | 1 | 0.06713722  | 0.30102999   | 6  | 0 | 0.44141547 | 0          |
| chr7 | 135739797 | 135739856 | 60     | 1  | 4 | 1 | 0.03812622  | 0.30102999   | 7  | 0 | 0.60763643 | 0          |
| chr7 | 135739856 | 135865434 | 125579 | 2  | 4 | 1 | 0.06713722  | 0.30102999   | 6  | 0 | 0.44141547 | 0          |
| chr7 | 135865434 | 135865493 | 60     | 1  | 4 | 1 | 0.03812622  | 0.30102999   | 7  | 0 | 0.60763643 | 0          |
| chr7 | 135865493 | 135923764 | 58272  | 1  | 4 | 1 | 0.06713722  | 0.30102999   | 6  | 0 | 0.44141547 | 0          |
| chr7 | 135923764 | 136063988 | 140225 | 3  | 4 | 1 | 0.11390336  | 0.30102999   | 5  | 0 | 0.30102999 | 0          |
| chr7 | 136063988 | 136092407 | 28420  | 1  | 3 | 1 | 0.05670724  | 0.30102999   | 5  | 0 | 0.45545077 | 0          |
| chr7 | 136092407 | 136540747 | 448341 | 10 | 3 | 1 | 0.10122019  | 0.30102999   | 4  | 0 | 0.30102999 | 0          |
| chr7 | 136540747 | 136540806 | 60     | 1  | 3 | 1 | 0.05670724  | 0.30102999   | 5  | 0 | 0.45545077 | 0          |
| chr7 | 136540806 | 136699615 | 158810 | 4  | 2 | 1 | 0.01262467  | 0.30102999   | 5  | 0 | 0.68214471 | 0          |
| chr7 | 136699615 | 136699674 | 60     | 1  | 3 | 1 | 0.05670724  | 0.30102999   | 5  | 0 | 0.45545077 | 0          |
| chr7 | 136699674 | 136805859 | 106186 | 2  | 3 | 1 | 0.10122019  | 0.30102999   | 4  | 0 | 0.30102999 | 0          |
| chr7 | 136805859 | 137028008 | 496950 | 11 | 3 | 1 | 0.05670724  | 0.30102999   | 5  | 0 | 0.45545077 | 0          |
| chr7 | 137028008 | 137436005 | 133198 | 4  | 4 | 1 | 0.11390336  | 0.30102999   | 5  | 0 | 0.30102999 | 0          |
| chr7 | 137436005 | 137544187 | 108183 | 2  | 3 | 1 | 0.05670724  | 0.30102999   | 5  | 0 | 0.45545077 | 0          |
| chr7 | 137544187 | 137597659 | 53473  | 2  | 4 | 1 | 0.06713722  | 0.30102999   | 6  | 0 | 0.44141547 | 0          |
| chr7 | 137597659 | 137597707 | 49     | 1  | 5 | 1 | 0.12309572  | 0.30102999   | 6  | 0 | 0.30102999 | 0          |
| chr7 | 137597707 | 137645389 | 47683  | 1  | 4 | 1 | 0.11390336  | 0.30102999   | 5  | 0 | 0.30102999 | 0          |
| chr7 | 137645389 | 137735357 | 89969  | 3  | 5 | 1 | 0.19510895  | 0.30102999   | 5  | 0 | 0.19510895 | 0          |
| chr7 | 137735357 | 137878359 | 143003 | 4  | 5 | 1 | 0.12309572  | 0.30102999   | 6  | 0 | 0.30102999 | 0          |
| chr7 | 137878359 | 137914662 | 36304  | 2  | 5 | 1 | 0.07511598  | 0.30102999   | 7  | 0 | 0.43181735 | 0          |
| chr7 | 137914662 | 138080879 | 166218 | 4  | 5 | 2 | 0.07511598  | 0.61140001   | 7  | 0 | 0.43181735 | 0          |
| chr7 | 138080879 | 138119953 | 39075  | 2  | 7 | 2 | 0.20469099  | 0.61140001   | 7  | 0 | 0.20469099 | 0          |
| chr7 | 138119953 | 138290465 | 170513 | 7  | 7 | 2 | 0.13499366  | 0.61140001   | 8  | 0 | 0.30102999 | 0          |
| chr7 | 138290465 | 138320582 | 30118  | 1  | 6 | 2 | 0.08122616  | 0.61140001   | 8  | 0 | 0.4250187  | 0          |
| chr7 | 138320582 | 138453585 | 133004 | 2  | 6 | 2 | 0.129913    | 0.61140001</ |    |   |            |            |

|      |           |           |         |    |   |   |            |            |   |   |            |            |
|------|-----------|-----------|---------|----|---|---|------------|------------|---|---|------------|------------|
| chr7 | 139966852 | 140043326 | 76475   | 2  | 4 | 2 | 0.11390336 | 0.61140001 | 5 | 0 | 0.30102999 | 0          |
| chr7 | 140043326 | 140043385 | 60      | 1  | 4 | 2 | 0.06713722 | 0.61140001 | 6 | 0 | 0.44141547 | 0          |
| chr7 | 140043385 | 140234201 | 190817  | 5  | 4 | 2 | 0.11390336 | 0.61140001 | 5 | 0 | 0.30102999 | 0          |
| chr7 | 140234201 | 140274928 | 40728   | 2  | 4 | 2 | 0.06713722 | 0.61140001 | 6 | 0 | 0.44141547 | 0          |
| chr7 | 140274928 | 140306327 | 31400   | 1  | 3 | 2 | 0.03070643 | 0.61140001 | 6 | 0 | 0.63695542 | 0          |
| chr7 | 140306327 | 140375777 | 69451   | 2  | 3 | 2 | 0.05670724 | 0.61140001 | 5 | 0 | 0.45545077 | 0          |
| chr7 | 140375777 | 140453998 | 78222   | 4  | 3 | 2 | 0.03070643 | 0.30102999 | 6 | 1 | 0.63695542 | 0.05404976 |
| chr7 | 140453998 | 140454057 | 60      | 1  | 3 | 2 | 0.01598258 | 0.30102999 | 7 | 1 | 0.84395715 | 0.05404976 |
| chr7 | 140454057 | 140534481 | 80425   | 2  | 3 | 2 | 0.03070643 | 0.30102999 | 6 | 1 | 0.63695542 | 0.05404976 |
| chr7 | 140534481 | 140620376 | 85896   | 3  | 4 | 2 | 0.06713722 | 0.1575501  | 6 | 2 | 0.44141547 | 0.1575501  |
| chr7 | 140620376 | 140671659 | 51284   | 1  | 4 | 2 | 0.06713722 | 0.30102999 | 6 | 1 | 0.44141547 | 0.05404976 |
| chr7 | 140671659 | 140740863 | 69205   | 2  | 4 | 1 | 0.06713722 | 0.1218695  | 6 | 1 | 0.44141547 | 0.1218695  |
| chr7 | 140740863 | 140803904 | 63042   | 2  | 4 | 1 | 0.06713722 | 0.05404976 | 6 | 2 | 0.44141547 | 0.30102999 |
| chr7 | 140803904 | 140869417 | 65514   | 1  | 4 | 1 | 0.06713722 | 0.1218695  | 6 | 1 | 0.44141547 | 0.1218695  |
| chr7 | 140869417 | 140869476 | 60      | 1  | 5 | 1 | 0.12309572 | 0.1218695  | 6 | 1 | 0.30102999 | 0.1218695  |
| chr7 | 140869476 | 140951427 | 81952   | 2  | 4 | 1 | 0.06713722 | 0.1218695  | 6 | 1 | 0.44141547 | 0.1218695  |
| chr7 | 140951427 | 140951486 | 60      | 1  | 5 | 1 | 0.12309572 | 0.1218695  | 6 | 1 | 0.30102999 | 0.1218695  |
| chr7 | 140951486 | 141405033 | 453548  | 10 | 4 | 1 | 0.06713722 | 0.1218695  | 6 | 1 | 0.44141547 | 0.1218695  |
| chr7 | 141405033 | 141405092 | 60      | 1  | 5 | 1 | 0.12309572 | 0.1218695  | 6 | 1 | 0.30102999 | 0.1218695  |
| chr7 | 141405092 | 141438657 | 33566   | 2  | 4 | 1 | 0.06713722 | 0.1218695  | 6 | 1 | 0.44141547 | 0.1218695  |
| chr7 | 141438657 | 141464180 | 25224   | 3  | 5 | 1 | 0.12309572 | 0.1218695  | 6 | 1 | 0.30102999 | 0.1218695  |
| chr7 | 141464180 | 141597935 | 133756  | 4  | 5 | 1 | 0.07511598 | 0.1218695  | 7 | 1 | 0.43181735 | 0.1218695  |
| chr7 | 141597935 | 141730228 | 132294  | 4  | 5 | 1 | 0.07511598 | 0.05404976 | 7 | 2 | 0.43181735 | 0.30102999 |
| chr7 | 141730228 | 141805616 | 75389   | 2  | 4 | 1 | 0.03812622 | 0.05404976 | 7 | 2 | 0.60763643 | 0.30102999 |
| chr7 | 141805616 | 142041570 | 235955  | 6  | 5 | 1 | 0.07511598 | 0.05404976 | 7 | 2 | 0.43181735 | 0.30102999 |
| chr7 | 142041570 | 142429393 | 387824  | 4  | 3 | 1 | 0.01598258 | 0.05404976 | 7 | 2 | 0.84395715 | 0.30102999 |
| chr7 | 142429393 | 142487095 | 5703    | 2  | 3 | 1 | 0.03070643 | 0.05404976 | 6 | 2 | 0.63695542 | 0.30102999 |
| chr7 | 142487095 | 142487154 | 60      | 1  | 3 | 2 | 0.03070643 | 0.1575501  | 6 | 2 | 0.63695542 | 0.1575501  |
| chr7 | 142487154 | 142561592 | 74439   | 2  | 3 | 1 | 0.03070643 | 0.05404976 | 6 | 2 | 0.63695542 | 0.30102999 |
| chr7 | 142561592 | 142580484 | 18893   | 2  | 3 | 2 | 0.03070643 | 0.1575501  | 6 | 2 | 0.63695542 | 0.1575501  |
| chr7 | 142580484 | 142637276 | 56793   | 3  | 3 | 1 | 0.03070643 | 0.05404976 | 6 | 2 | 0.63695542 | 0.30102999 |
| chr7 | 142637276 | 142763460 | 126185  | 4  | 3 | 2 | 0.01598258 | 0.1575501  | 7 | 2 | 0.84395715 | 0.1575501  |
| chr7 | 142763460 | 142798038 | 34579   | 2  | 3 | 2 | 0.0079614  | 0.1575501  | 8 | 2 | 1.07548421 | 0.1575501  |
| chr7 | 142798038 | 143175538 | 377501  | 19 | 3 | 2 | 0.01598258 | 0.1575501  | 7 | 2 | 0.84395715 | 0.1575501  |
| chr7 | 143175538 | 143425418 | 249881  | 2  | 3 | 2 | 0.0079614  | 0.1575501  | 8 | 2 | 1.07548421 | 0.1575501  |
| chr7 | 143425418 | 143426039 | 622     | 3  | 4 | 2 | 0.02074938 | 0.1575501  | 8 | 2 | 0.79906872 | 0.1575501  |
| chr7 | 143426039 | 143626560 | 200522  | 2  | 4 | 2 | 0.03812622 | 0.1575501  | 7 | 2 | 0.60763643 | 0.1575501  |
| chr7 | 143626560 | 143853032 | 226473  | 7  | 4 | 2 | 0.02074938 | 0.1575501  | 8 | 2 | 0.79906872 | 0.1575501  |
| chr7 | 143853032 | 143952435 | 99404   | 1  | 4 | 2 | 0.03812622 | 0.1575501  | 7 | 2 | 0.60763643 | 0.1575501  |
| chr7 | 143952435 | 144075261 | 122827  | 4  | 1 | 2 | 0.03812622 | 0.05404976 | 7 | 2 | 0.60763643 | 0.30102999 |
| chr7 | 144075261 | 144134169 | 58909   | 2  | 4 | 1 | 0.02074938 | 0.05404976 | 8 | 2 | 0.79906872 | 0.30102999 |
| chr7 | 144134169 | 144204173 | 70005   | 2  | 3 | 1 | 0.03070643 | 0.05404976 | 6 | 2 | 0.63695542 | 0.30102999 |
| chr7 | 144204173 | 144245804 | 41632   | 1  | 2 | 1 | 0.01053319 | 0.05404976 | 6 | 2 | 0.91219088 | 0.30102999 |
| chr7 | 144245804 | 144245863 | 60      | 1  | 3 | 2 | 0.01053319 | 0.30102999 | 6 | 2 | 0.91219088 | 0.08289318 |
| chr7 | 144245863 | 144288503 | 42641   | 1  | 2 | 2 | 0.01053319 | 0.1575501  | 6 | 2 | 0.91219088 | 0.1575501  |
| chr7 | 144288503 | 144340908 | 52406   | 2  | 3 | 2 | 0.03070643 | 0.1575501  | 6 | 2 | 0.63695542 | 0.1575501  |
| chr7 | 144340908 | 144379972 | 39065   | 1  | 2 | 2 | 0.01053319 | 0.1575501  | 6 | 2 | 0.91219088 | 0.1575501  |
| chr7 | 144379972 | 144419845 | 39874   | 2  | 2 | 3 | 0.01053319 | 0.30102999 | 6 | 2 | 0.91219088 | 0.08289318 |
| chr7 | 144419845 | 144462961 | 43117   | 1  | 2 | 2 | 0.01053319 | 0.1575501  | 6 | 2 | 0.91219088 | 0.1575501  |
| chr7 | 144462961 | 144520633 | 57673   | 2  | 2 | 2 | 0.00221948 | 0.1575501  | 8 | 2 | 1.44210395 | 0.1575501  |
| chr7 | 144520633 | 14466746  | 346114  | 7  | 2 | 3 | 0.00221948 | 0.30102999 | 8 | 2 | 1.44210395 | 0.08289318 |
| chr7 | 14466746  | 144947347 | 80602   | 2  | 1 | 3 | 3.39E-04   | 0.30102999 | 8 | 2 | 1.94674965 | 0.08289318 |
| chr7 | 144947347 | 144947406 | 60      | 1  | 1 | 3 | 0.00221948 | 0.17593012 | 8 | 3 | 1.44210395 | 0.17593012 |
| chr7 | 144947406 | 145026181 | 78776   | 1  | 3 | 3 | 3.39E-04   | 0.17593012 | 8 | 3 | 1.94674965 | 0.17593012 |
| chr7 | 145026181 | 145026240 | 60      | 1  | 2 | 3 | 0.00221948 | 0.17593012 | 8 | 3 | 1.44210395 | 0.17593012 |
| chr7 | 145026240 | 145064958 | 38719   | 1  | 3 | 3 | 0.00221948 | 0.30102999 | 8 | 2 | 1.44210395 | 0.08289318 |
| chr7 | 145064958 | 145133696 | 68739   | 1  | 2 | 2 | 0.00221948 | 0.1575501  | 8 | 2 | 1.44210395 | 0.1575501  |
| chr7 | 145133696 | 145178038 | 44343   | 1  | 2 | 2 | 3.39E-04   | 0.1575501  | 8 | 2 | 1.94674965 | 0.1575501  |
| chr7 | 145178038 | 145208793 | 30756   | 2  | 1 | 3 | 3.39E-04   | 0.30102999 | 8 | 2 | 1.94674965 | 0.08289318 |
| chr7 | 145208793 | 145349255 | 140463  | 3  | 3 | 3 | 8.47E-04   | 0.30102999 | 7 | 2 | 1.62048027 | 0.08289318 |
| chr7 | 145349255 | 145397096 | 47842   | 2  | 1 | 3 | 8.47E-04   | 0.17593012 | 7 | 3 | 1.62048027 | 0.17593012 |
| chr7 | 145397096 | 145525078 | 127983  | 3  | 1 | 3 | 0.00204627 | 0.17593012 | 6 | 3 | 1.31360226 | 0.17593012 |
| chr7 | 145525078 | 145556874 | 31797   | 2  | 1 | 3 | 8.47E-04   | 0.17593012 | 7 | 3 | 1.62048027 | 0.17593012 |
| chr7 | 145556874 | 145560396 | 93523   | 2  | 1 | 3 | 0.00204627 | 0.17593012 | 6 | 3 | 1.31360226 | 0.17593012 |
| chr7 | 145560396 | 145650453 | 60      | 1  | 2 | 3 | 0.01053319 | 0.17593012 | 6 | 3 | 0.91219088 | 0.17593012 |
| chr7 | 145650453 | 145726212 | 75758   | 2  | 2 | 3 | 0.00254667 | 0.17593012 | 5 | 3 | 0.68214471 | 0.17593012 |
| chr7 | 145726212 | 145781576 | 55365   | 1  | 1 | 3 | 0.00478973 | 0.17593012 | 5 | 3 | 1.02644391 | 0.17593012 |
| chr7 | 145781576 | 145824684 | 43109   | 2  | 1 | 3 | 0.00204627 | 0.17593012 | 6 | 3 | 1.31360226 | 0.17593012 |
| chr7 | 145824684 | 145824743 | 60      | 1  | 4 | 3 | 0.00204627 | 0.30102999 | 6 | 3 | 1.31360226 | 0.10122019 |
| chr7 | 145824743 | 145912108 | 87366   | 2  | 1 | 3 | 0.00204627 | 0.17593012 | 6 | 3 | 1.31360226 | 0.17593012 |
| chr7 | 145912108 | 145971019 | 58912   | 2  | 1 | 3 | 8.47E-04   | 0.17593012 | 7 | 3 | 1.62048027 | 0.17593012 |
| chr7 | 145971019 | 146017032 | 46014   | 2  | 1 | 3 | 3.39E-04   | 0.17593012 | 8 | 3 | 1.94674965 | 0.17593012 |
| chr7 | 146017032 | 146017091 | 60      | 1  | 2 | 3 | 0.00221948 | 0.17593012 | 8 | 3 | 1.44210395 | 0.17593012 |
| chr7 | 146017091 | 146236230 | 219140  | 4  | 1 | 3 | 3.39E-04   | 0.17593012 | 8 | 3 | 1.94674965 | 0.17593012 |
| chr7 | 146236230 | 14633829  | 97600   | 3  | 2 | 3 | 0.00221948 | 0.17593012 | 8 | 3 | 1.44210395 | 0.17593012 |
| chr7 | 14633829  | 146367408 | 33580   | 1  | 2 | 3 | 0.00493743 | 0.17593012 | 7 | 3 | 1.16581773 | 0.17593012 |
| chr7 | 146367408 | 146451347 | 83940   | 2  | 1 | 3 | 0.01053319 | 0.17593012 | 6 | 3 | 0.91219088 | 0.17593012 |
| chr7 | 146451347 | 146498949 | 47603   | 2  | 2 | 3 | 0.00493743 | 0.17593012 | 7 | 3 | 1.16581773 | 0.17593012 |
| chr7 | 146498949 | 146587249 | 88301   | 2  | 2 | 3 | 0.01053319 | 0.17593012 | 6 | 3 | 0.91219088 | 0.17593012 |
| chr7 | 146587249 | 146587308 | 60      | 1  | 2 | 3 | 0.00493743 | 0.17593012 | 7 | 3 | 1.16581773 | 0.17593012 |
| chr7 | 146587308 | 146730472 | 143165  | 2  | 2 | 3 | 0.01053319 | 0.17593012 | 6 | 3 | 0.91219088 | 0.17593012 |
| chr7 | 146730472 | 146763404 | 32933   | 2  | 2 | 3 | 0.00493743 | 0.17593012 | 7 | 3 | 1.16581773 | 0.17593012 |
| chr7 | 146763404 | 146805297 | 41894   | 1  | 2 | 3 | 0.01053319 | 0.17593012 | 6 | 3 | 0.91219088 | 0.17593012 |
| chr7 | 146805297 | 146981028 | 175732  | 4  | 1 | 3 | 0.00204627 | 0.17593012 | 6 | 3 | 1.31360226 | 0.17593012 |
| chr7 | 146981028 | 147147025 | 165998  | 5  | 2 | 3 | 0.01053319 | 0.17593012 | 6 | 3 | 0.91219088 | 0.17593012 |
| chr7 | 147147025 | 147292374 | 145350  | 3  | 2 | 3 | 0.02162467 | 0.17593012 | 5 | 3 | 0.68214471 | 0.17593012 |
| chr7 | 147292374 | 147335706 | 43333   | 2  | 2 | 3 | 0.01053319 | 0.17593012 | 6 | 3 | 0.91219088 | 0.17593012 |
| chr7 | 147335706 | 147366936 | 31231   | 2  | 2 | 3 | 0.00493743 | 0.17593012 | 7 | 3 | 1.16581773 | 0.17593012 |
| chr7 | 147366936 | 147366995 | 60      | 1  | 2 | 3 | 0.00221948 | 0.17593012 | 8 | 3 | 1.44210395 | 0.17593012 |
| chr7 | 147366995 | 147417054 | 50060</ |    |   |   |            |            |   |   |            |            |

|      |           |           |        |    |   |   |            |            |   |   |            |            |
|------|-----------|-----------|--------|----|---|---|------------|------------|---|---|------------|------------|
| chr7 | 150754875 | 150882916 | 128042 | 6  | 3 | 3 | 0.03070643 | 0.10122019 | 6 | 4 | 0.63695542 | 0.30102999 |
| chr7 | 150882916 | 151042488 | 159573 | 4  | 3 | 2 | 0.05670724 | 0.0429175  | 5 | 4 | 0.45545077 | 0.47744371 |
| chr7 | 151042488 | 151065059 | 22572  | 2  | 3 | 3 | 0.05670724 | 0.10122019 | 5 | 4 | 0.45545077 | 0.30102999 |
| chr7 | 151065059 | 151385392 | 320334 | 6  | 3 | 3 | 0.05670724 | 0.17593012 | 5 | 3 | 0.45545077 | 0.17593012 |
| chr7 | 151385392 | 151438034 | 52643  | 2  | 4 | 3 | 0.06713722 | 0.17593012 | 6 | 3 | 0.44141547 | 0.17593012 |
| chr7 | 151438034 | 151573677 | 135644 | 4  | 3 | 3 | 0.03070643 | 0.17593012 | 6 | 3 | 0.63695542 | 0.17593012 |
| chr7 | 151573677 | 151602419 | 28743  | 2  | 3 | 3 | 0.01598258 | 0.17593012 | 7 | 3 | 0.84395715 | 0.17593012 |
| chr7 | 151602419 | 151602478 | 60     | 1  | 3 | 3 | 0.0079614  | 0.17593012 | 8 | 3 | 1.07548421 | 0.17593012 |
| chr7 | 151602478 | 151711773 | 109296 | 4  | 3 | 3 | 0.01598258 | 0.17593012 | 7 | 3 | 0.84395715 | 0.17593012 |
| chr7 | 151711773 | 151748853 | 37081  | 2  | 3 | 3 | 0.0079614  | 0.17593012 | 8 | 3 | 1.07548421 | 0.17593012 |
| chr7 | 151748853 | 151748912 | 60     | 1  | 3 | 4 | 0.0079614  | 0.30102999 | 8 | 3 | 1.07548421 | 0.10122019 |
| chr7 | 151748912 | 151776649 | 27738  | 1  | 3 | 4 | 0.03070643 | 0.30102999 | 6 | 3 | 0.63695542 | 0.10122019 |
| chr7 | 151776649 | 151917504 | 140856 | 3  | 3 | 3 | 0.05670724 | 0.17593012 | 5 | 3 | 0.45545077 | 0.17593012 |
| chr7 | 151917504 | 152008358 | 90855  | 2  | 3 | 2 | 0.05670724 | 0.0828918  | 5 | 3 | 0.45545077 | 0.30102999 |
| chr7 | 152008358 | 152008417 | 60     | 1  | 3 | 3 | 0.03070643 | 0.17593012 | 6 | 3 | 0.63695542 | 0.17593012 |
| chr7 | 152008417 | 152032715 | 24299  | 1  | 3 | 3 | 0.05670724 | 0.17593012 | 5 | 3 | 0.45545077 | 0.17593012 |
| chr7 | 152032715 | 152351866 | 319152 | 4  | 2 | 3 | 0.02162467 | 0.17593012 | 5 | 3 | 0.68214471 | 0.17593012 |
| chr7 | 152351866 | 152418291 | 66426  | 2  | 2 | 2 | 0.02162467 | 0.0828918  | 5 | 3 | 0.68214471 | 0.30102999 |
| chr7 | 152418291 | 152516257 | 97967  | 3  | 2 | 2 | 0.02162467 | 0.0429175  | 4 | 3 | 0.47744371 | 0.30102999 |
| chr7 | 152516257 | 152516316 | 60     | 1  | 2 | 2 | 0.02162467 | 0.0828918  | 5 | 3 | 0.68214471 | 0.30102999 |
| chr7 | 152516316 | 152552113 | 35798  | 1  | 2 | 2 | 0.0429175  | 0.0828918  | 4 | 3 | 0.47744371 | 0.30102999 |
| chr7 | 152552113 | 152552172 | 60     | 1  | 2 | 3 | 0.0429175  | 0.17593012 | 4 | 3 | 0.47744371 | 0.17593012 |
| chr7 | 152552172 | 152765094 | 212923 | 2  | 2 | 2 | 0.0429175  | 0.0828918  | 4 | 3 | 0.47744371 | 0.30102999 |
| chr7 | 152765094 | 152765153 | 60     | 1  | 2 | 3 | 0.0429175  | 0.17593012 | 4 | 3 | 0.47744371 | 0.17593012 |
| chr7 | 152765153 | 152848370 | 83218  | 1  | 2 | 2 | 0.0429175  | 0.0828918  | 4 | 3 | 0.47744371 | 0.30102999 |
| chr7 | 152848370 | 153021983 | 173614 | 1  | 2 | 2 | 0.01091641 | 0.0828918  | 4 | 3 | 0.76005302 | 0.30102999 |
| chr7 | 153021983 | 153157388 | 135406 | 2  | 1 | 3 | 0.01091641 | 0.17593012 | 4 | 3 | 0.76005302 | 0.17593012 |
| chr7 | 153157388 | 153157447 | 60     | 1  | 3 | 3 | 0.0429175  | 0.17593012 | 4 | 3 | 0.47744371 | 0.17593012 |
| chr7 | 153157447 | 153569109 | 411663 | 2  | 1 | 3 | 0.01091641 | 0.17593012 | 3 | 3 | 0.76005302 | 0.17593012 |
| chr7 | 153569109 | 153617970 | 48862  | 2  | 2 | 3 | 0.0429175  | 0.10122019 | 4 | 4 | 0.47744371 | 0.30102999 |
| chr7 | 153617970 | 153618029 | 60     | 1  | 3 | 3 | 0.10122019 | 0.10122019 | 4 | 4 | 0.30102999 | 0.30102999 |
| chr7 | 153618029 | 153761547 | 143519 | 4  | 2 | 3 | 0.0429175  | 0.10122019 | 4 | 4 | 0.47744371 | 0.30102999 |
| chr7 | 153761547 | 153761606 | 60     | 1  | 3 | 3 | 0.10122019 | 0.10122019 | 4 | 4 | 0.30102999 | 0.30102999 |
| chr7 | 153761606 | 153891336 | 129731 | 2  | 2 | 3 | 0.0429175  | 0.10122019 | 4 | 4 | 0.47744371 | 0.30102999 |
| chr7 | 153891336 | 154263945 | 372610 | 10 | 3 | 3 | 0.10122019 | 0.10122019 | 4 | 4 | 0.30102999 | 0.30102999 |
| chr7 | 154263945 | 154946297 | 682353 | 18 | 3 | 3 | 0.05670724 | 0.10122019 | 5 | 4 | 0.45545077 | 0.30102999 |
| chr7 | 154946297 | 155008840 | 62544  | 1  | 3 | 3 | 0.10122019 | 0.10122019 | 4 | 4 | 0.30102999 | 0.30102999 |
| chr7 | 155008840 | 155255740 | 246901 | 5  | 3 | 2 | 0.10122019 | 0.0429175  | 4 | 4 | 0.30102999 | 0.47744371 |
| chr7 | 155255740 | 155257298 | 1559   | 3  | 3 | 3 | 0.10122019 | 0.10122019 | 4 | 4 | 0.30102999 | 0.30102999 |
| chr7 | 155257298 | 155330437 | 73140  | 2  | 3 | 2 | 0.10122019 | 0.0429175  | 4 | 4 | 0.30102999 | 0.47744371 |
| chr7 | 155330437 | 155330496 | 60     | 1  | 3 | 3 | 0.10122019 | 0.10122019 | 4 | 4 | 0.30102999 | 0.30102999 |
| chr7 | 155330496 | 155707594 | 377099 | 8  | 3 | 2 | 0.10122019 | 0.0429175  | 4 | 4 | 0.30102999 | 0.47744371 |
| chr7 | 155707594 | 155707653 | 60     | 1  | 3 | 2 | 0.05670724 | 0.0429175  | 5 | 4 | 0.45545077 | 0.47744371 |
| chr7 | 155707653 | 155911833 | 204181 | 3  | 3 | 2 | 0.10122019 | 0.0429175  | 4 | 4 | 0.30102999 | 0.47744371 |
| chr7 | 155911833 | 156052598 | 140766 | 4  | 3 | 2 | 0.03070643 | 0.0429175  | 6 | 4 | 0.63695542 | 0.47744371 |
| chr7 | 156052598 | 156235636 | 183039 | 2  | 3 | 2 | 0.10122019 | 0.0828918  | 4 | 3 | 0.30102999 | 0.30102999 |
| chr7 | 156235636 | 156407328 | 171693 | 2  | 2 | 2 | 0.0429175  | 0.0828918  | 3 | 3 | 0.47744371 | 0.30102999 |
| chr7 | 156407328 | 156431093 | 23766  | 2  | 3 | 3 | 0.02162467 | 0.17593012 | 5 | 3 | 0.68214471 | 0.17593012 |
| chr7 | 156431093 | 156475623 | 44531  | 4  | 2 | 4 | 0.02162467 | 0.10122019 | 5 | 4 | 0.68214471 | 0.30102999 |
| chr7 | 156475623 | 156589139 | 113517 | 2  | 3 | 3 | 0.0429175  | 0.10122019 | 4 | 4 | 0.47744371 | 0.30102999 |
| chr7 | 156589139 | 156589198 | 60     | 1  | 2 | 3 | 0.02162467 | 0.10122019 | 5 | 4 | 0.68214471 | 0.30102999 |
| chr7 | 156589198 | 156684752 | 95555  | 2  | 2 | 3 | 0.0429175  | 0.10122019 | 4 | 4 | 0.47744371 | 0.30102999 |
| chr7 | 156684752 | 156922311 | 237560 | 6  | 2 | 3 | 0.02162467 | 0.10122019 | 5 | 4 | 0.68214471 | 0.30102999 |
| chr7 | 156922311 | 156969269 | 46959  | 2  | 3 | 3 | 0.05670724 | 0.10122019 | 4 | 4 | 0.45545077 | 0.30102999 |
| chr7 | 156969269 | 157009703 | 40435  | 2  | 3 | 3 | 0.03070643 | 0.10122019 | 6 | 4 | 0.63695542 | 0.30102999 |
| chr7 | 157009703 | 157133297 | 123595 | 3  | 3 | 3 | 0.05670724 | 0.10122019 | 5 | 4 | 0.45545077 | 0.30102999 |
| chr7 | 157133297 | 157133356 | 60     | 1  | 5 | 3 | 0.12309572 | 0.10122019 | 6 | 4 | 0.30102999 | 0.30102999 |
| chr7 | 157133356 | 157258597 | 125242 | 3  | 5 | 3 | 0.19510895 | 0.10122019 | 5 | 4 | 0.19510895 | 0.30102999 |
| chr7 | 157258597 | 157319939 | 61343  | 1  | 5 | 2 | 0.19510895 | 0.0429175  | 5 | 4 | 0.19510895 | 0.47744371 |
| chr7 | 157319939 | 157345353 | 25415  | 3  | 5 | 2 | 0.12309572 | 0.0429175  | 6 | 4 | 0.30102999 | 0.47744371 |
| chr7 | 157345353 | 157422753 | 77401  | 4  | 5 | 3 | 0.12309572 | 0.10122019 | 6 | 4 | 0.30102999 | 0.30102999 |
| chr7 | 157422753 | 157422812 | 60     | 1  | 5 | 3 | 0.12309572 | 0.05670724 | 6 | 5 | 0.30102999 | 0.45545077 |
| chr7 | 157422812 | 157463498 | 40687  | 1  | 5 | 3 | 0.19510895 | 0.05670724 | 5 | 5 | 0.19510895 | 0.45545077 |
| chr7 | 157463498 | 157596312 | 134815 | 4  | 5 | 3 | 0.19510895 | 0.03070643 | 6 | 6 | 0.19510895 | 0.63695542 |
| chr7 | 157596312 | 157643650 | 45339  | 4  | 3 | 3 | 0.11390336 | 0.03070643 | 6 | 6 | 0.30102999 | 0.63695542 |
| chr7 | 157643650 | 157875046 | 231397 | 5  | 2 | 6 | 0.02162467 | 0.03070643 | 6 | 6 | 0.68214471 | 0.63695542 |
| chr7 | 157875046 | 157875105 | 60     | 1  | 4 | 3 | 0.11390336 | 0.03070643 | 5 | 6 | 0.30102999 | 0.63695542 |
| chr7 | 157875105 | 158020297 | 145139 | 3  | 3 | 3 | 0.05670724 | 0.03070643 | 5 | 6 | 0.45545077 | 0.63695542 |
| chr7 | 158020297 | 158110290 | 89994  | 3  | 3 | 4 | 0.05670724 | 0.06713722 | 5 | 6 | 0.45545077 | 0.44141547 |
| chr7 | 158110290 | 158201462 | 91173  | 2  | 2 | 4 | 0.02162467 | 0.06713722 | 5 | 6 | 0.68214471 | 0.44141547 |
| chr7 | 158201462 | 158269643 | 68182  | 2  | 2 | 4 | 0.02162467 | 0.03812622 | 5 | 7 | 0.68214471 | 0.60763643 |
| chr7 | 158269643 | 158365342 | 95700  | 4  | 2 | 4 | 0.02162467 | 0.02074938 | 5 | 8 | 0.68214471 | 0.79906872 |
| chr7 | 158365342 | 158365401 | 60     | 1  | 4 | 4 | 0.05670724 | 0.02074938 | 5 | 8 | 0.45545077 | 0.79906872 |
| chr7 | 158365401 | 158599209 | 238809 | 4  | 3 | 3 | 0.05670724 | 0.03070643 | 5 | 6 | 0.45545077 | 0.63695542 |
| chr7 | 158599209 | 158695253 | 96045  | 2  | 2 | 3 | 0.02162467 | 0.1053319  | 6 | 6 | 0.68214471 | 0.91219088 |
| chr7 | 158695253 | 158738830 | 43578  | 1  | 2 | 2 | 0.0429175  | 0.02162467 | 4 | 5 | 0.47744371 | 0.68214471 |
| chr7 | 158738830 | 158738889 | 60     | 1  | 3 | 2 | 0.05670724 | 0.02162467 | 5 | 5 | 0.45545077 | 0.68214471 |
| chr7 | 158738889 | 158827238 | 88350  | 2  | 2 | 1 | 0.0828918  | 0.00478973 | 3 | 5 | 0.30102999 | 1.02643191 |
| chr7 | 158827238 | 158861586 | 34349  | 2  | 2 | 1 | 0.0429175  | 0.00478973 | 4 | 5 | 0.47744371 | 1.02643191 |
| chr7 | 158861586 | 158909738 | 48153  | 1  | 2 | 1 | 0.0828918  | 0.00478973 | 3 | 5 | 0.30102999 | 1.02643191 |
| chr7 | 158909738 | 159088636 | 178899 | 1  | 2 | 1 | 0.1575501  | 0.05404976 | 2 | 2 | 0.1575501  | 0.30102999 |
| chr8 | 221611    | 379418    | 157808 | 3  | 0 | 2 | 0          | 0.0429175  | 0 | 0 | 0          | 0.47744371 |
| chr8 | 379418    | 442326    | 62909  | 2  | 0 | 3 | 0.0079614  | 0          | 8 | 0 | 0          | 1.07548421 |
| chr8 | 442326    | 627655    | 185330 | 2  | 0 | 0 | 0.01598258 | 0          | 7 | 0 | 0          | 0.84395715 |
| chr8 | 627655    | 714325    | 86671  | 2  | 0 | 6 | 0          | 0.129913   | 0 | 7 | 0          | 0.30102999 |
| chr8 | 714325    | 714384    | 60     | 1  | 0 | 8 | 0          | 0.13872638 | 0 | 9 | 0          | 0.30102999 |
| chr8 | 714384    | 770001    | 55618  | 1  | 0 | 8 | 0          | 0.20764654 | 0 | 8 | 0          | 0.20764654 |
| chr8 | 770001    | 770060    | 60     | 1  | 1 | 9 | 0.30102999 | 0.20975986 | 9 | 0 | 0          | 0.20975986 |
| chr8 | 770060    | 843383    | 73324  | 1  | 1 | 9 | 0.30102999 | 0.30102999 | 8 | 0 | 0          | 0.13872638 |
| chr8 | 843383    | 977218    | 133836 | 2  | 1 | 9 | 0.30102999 | 0.20975986 | 9 | 0 | 0          | 0.20975986 |
|      |           |           |        |    |   |   |            |            |   |   |            |            |

|      |          |          |        |    |   |    |            |            |   |    |            |            |
|------|----------|----------|--------|----|---|----|------------|------------|---|----|------------|------------|
| chr8 | 4301326  | 4301385  | 60     | 1  | 0 | 9  | 0          | 0.20975986 | 0 | 9  | 0          | 0.20975986 |
| chr8 | 4301385  | 4660008  | 35624  | 7  | 0 | 8  | 0          | 0.13872638 | 0 | 9  | 0          | 0.30102999 |
| chr8 | 4660008  | 4660067  | 60     | 1  | 0 | 8  | 0          | 0.08923391 | 0 | 10 | 0          | 0.4167287  |
| chr8 | 4660067  | 4725168  | 65102  | 1  | 0 | 8  | 0          | 0.13872638 | 0 | 9  | 0          | 0.30102999 |
| chr8 | 4725168  | 5232698  | 507531 | 7  | 0 | 6  | 0          | 0.04875589 | 0 | 9  | 0          | 0.5732208  |
| chr8 | 5232698  | 5454489  | 221792 | 1  | 0 | 4  | 0          | 0.01077081 | 0 | 9  | 0          | 1.01542894 |
| chr8 | 5454489  | 5721369  | 266881 | 2  | 0 | 3  | 0          | 0.01598258 | 0 | 7  | 0          | 0.84395715 |
| chr8 | 5721369  | 5721428  | 60     | 1  | 1 | 4  | 0.30102999 | 0.03812622 | 0 | 7  | 0          | 0.60763643 |
| chr8 | 5721428  | 5829649  | 108222 | 1  | 0 | 2  | 0          | 0.00493743 | 0 | 7  | 0          | 1.16581773 |
| chr8 | 5829649  | 5921954  | 92306  | 2  | 0 | 3  | 0          | 0.01598258 | 0 | 7  | 0          | 0.84395715 |
| chr8 | 5921954  | 5922013  | 60     | 1  | 0 | 4  | 0          | 0.03812622 | 0 | 7  | 0          | 0.60763643 |
| chr8 | 5922013  | 6261022  | 339010 | 3  | 0 | 2  | 0          | 0.00493743 | 0 | 7  | 0          | 1.16581773 |
| chr8 | 6261022  | 6550066  | 289045 | 8  | 0 | 4  | 0          | 0.01077081 | 0 | 9  | 0          | 1.01542894 |
| chr8 | 6550066  | 6746478  | 196413 | 4  | 0 | 2  | 0          | 0.01053319 | 0 | 6  | 0          | 0.91219088 |
| chr8 | 6746478  | 6914076  | 167599 | 3  | 0 | 2  | 0          | 0.02162467 | 0 | 5  | 0          | 0.68214471 |
| chr8 | 6914076  | 8130689  | 60     | 1  | 0 | 2  | 0          | 0.08289318 | 1 | 3  | 0.30102999 | 0.30102999 |
| chr8 | 8130689  | 8353662  | 222974 | 2  | 0 | 2  | 0          | 0.08289318 | 0 | 3  | 0          | 0.30102999 |
| chr8 | 8353662  | 8353721  | 60     | 1  | 0 | 4  | 0          | 0.11390336 | 0 | 5  | 0          | 0.30102999 |
| chr8 | 8353721  | 8557157  | 203437 | 2  | 0 | 3  | 0          | 0.10122019 | 0 | 4  | 0          | 0.30102999 |
| chr8 | 8557157  | 8621658  | 64502  | 2  | 1 | 3  | 0.1218695  | 0.05670724 | 1 | 5  | 0.1218695  | 0.45545077 |
| chr8 | 8621658  | 8684645  | 62908  | 2  | 1 | 4  | 0.1218695  | 0.01077081 | 1 | 9  | 0.1218695  | 1.01542894 |
| chr8 | 8684645  | 8857854  | 173210 | 2  | 1 | 4  | 0.30102999 | 0.01077081 | 0 | 9  | 0          | 1.01542894 |
| chr8 | 8857854  | 8891761  | 33908  | 2  | 2 | 5  | 0.6114001  | 0.02473314 | 0 | 9  | 0          | 0.76806864 |
| chr8 | 8891761  | 9097498  | 205738 | 4  | 1 | 4  | 0.30102999 | 0.01077081 | 0 | 9  | 0          | 1.01542894 |
| chr8 | 9097498  | 9261291  | 163794 | 3  | 1 | 4  | 0.30102999 | 0.00530919 | 0 | 10 | 0          | 1.2568129  |
| chr8 | 9261291  | 9313799  | 52509  | 2  | 5 | 5  | 0.6114001  | 0.01320236 | 0 | 10 | 0          | 0.97397077 |
| chr8 | 9313799  | 9372240  | 58422  | 1  | 1 | 5  | 0.30102999 | 0.01320236 | 0 | 10 | 0          | 0.97397077 |
| chr8 | 9372240  | 9423529  | 51290  | 1  | 1 | 4  | 0.30102999 | 0.00530919 | 0 | 10 | 0          | 1.2568129  |
| chr8 | 9423529  | 9423588  | 60     | 1  | 2 | 4  | 0.30102999 | 0.00530919 | 1 | 10 | 0.05404976 | 1.2568129  |
| chr8 | 9423588  | 9556782  | 133195 | 2  | 2 | 4  | 0.6114001  | 0.00530919 | 0 | 10 | 0          | 1.2568129  |
| chr8 | 9556782  | 9556841  | 60     | 1  | 2 | 6  | 0.6114001  | 0.02793176 | 0 | 10 | 0          | 0.74627054 |
| chr8 | 9556841  | 9615475  | 58635  | 2  | 2 | 4  | 0.6114001  | 0.00530919 | 0 | 10 | 0          | 1.2568129  |
| chr8 | 9615475  | 9638929  | 23455  | 2  | 2 | 6  | 0.6114001  | 0.02793176 | 0 | 10 | 0          | 0.74627054 |
| chr8 | 9638929  | 9638988  | 60     | 1  | 2 | 6  | 0.30102999 | 0.02793176 | 1 | 10 | 0.05404976 | 0.74627054 |
| chr8 | 9638988  | 9687615  | 48628  | 1  | 2 | 4  | 0.30102999 | 0.01077081 | 0 | 9  | 0.05404976 | 1.01542894 |
| chr8 | 9687615  | 9730056  | 42442  | 2  | 1 | 5  | 0.30102999 | 0.02473314 | 1 | 9  | 0.05404976 | 0.76806864 |
| chr8 | 9730056  | 9759684  | 29629  | 2  | 2 | 7  | 0.30102999 | 0.05232577 | 1 | 10 | 0.05404976 | 0.56314362 |
| chr8 | 9759684  | 9819189  | 59506  | 2  | 2 | 7  | 0.6114001  | 0.08584816 | 0 | 9  | 0          | 0.42015402 |
| chr8 | 9819189  | 9819248  | 60     | 1  | 2 | 7  | 0.6114001  | 0.03037338 | 0 | 11 | 0          | 0.73110763 |
| chr8 | 9819248  | 9918050  | 98803  | 1  | 2 | 7  | 0.6114001  | 0.08584816 | 0 | 9  | 0          | 0.42015402 |
| chr8 | 9918050  | 9992928  | 74879  | 1  | 2 | 6  | 0.6114001  | 0.04875589 | 0 | 9  | 0          | 0.5732208  |
| chr8 | 9992928  | 10029423 | 36496  | 2  | 2 | 6  | 0.6114001  | 0.02793176 | 0 | 10 | 0          | 0.74627054 |
| chr8 | 10029423 | 10065376 | 35954  | 2  | 2 | 8  | 0.6114001  | 0.08923391 | 0 | 10 | 0          | 0.4167287  |
| chr8 | 10065376 | 10190619 | 125244 | 2  | 2 | 8  | 0.6114001  | 0.13872638 | 0 | 9  | 0          | 0.30102999 |
| chr8 | 10190619 | 10358352 | 167734 | 4  | 2 | 8  | 0.6114001  | 0.08923391 | 0 | 10 | 0          | 0.4167287  |
| chr8 | 10358352 | 11012211 | 653860 | 20 | 2 | 8  | 0.6114001  | 0.05490675 | 0 | 11 | 0          | 0.55623409 |
| chr8 | 11012211 | 11374000 | 361790 | 14 | 2 | 7  | 0.6114001  | 0.03037338 | 0 | 11 | 0          | 0.73110763 |
| chr8 | 11374000 | 11516619 | 142620 | 3  | 2 | 7  | 0.6114001  | 0.05232577 | 0 | 10 | 0          | 0.56314362 |
| chr8 | 11516619 | 11567555 | 50937  | 2  | 2 | 7  | 0.6114001  | 0.03037338 | 0 | 11 | 0          | 0.73110763 |
| chr8 | 11567555 | 11732948 | 165394 | 7  | 1 | 7  | 0.30102999 | 0.03037338 | 0 | 11 | 0          | 0.73110763 |
| chr8 | 11732948 | 11841842 | 108895 | 2  | 1 | 6  | 0.30102999 | 0.02793176 | 0 | 10 | 0          | 0.74627054 |
| chr8 | 11841842 | 11841901 | 60     | 1  | 1 | 7  | 0.30102999 | 0.03037338 | 0 | 11 | 0          | 0.73110763 |
| chr8 | 11841901 | 12586472 | 744572 | 3  | 0 | 5  | 0          | 0.07511598 | 0 | 7  | 0          | 0.43181735 |
| chr8 | 12586472 | 12824735 | 238264 | 3  | 0 | 5  | 0          | 0.19510895 | 0 | 5  | 0          | 0.19510895 |
| chr8 | 12824735 | 12824794 | 60     | 1  | 0 | 5  | 0          | 0.12309572 | 0 | 6  | 0          | 0.30102999 |
| chr8 | 12824794 | 12942604 | 117811 | 3  | 0 | 5  | 0          | 0.19510895 | 0 | 5  | 0          | 0.19510895 |
| chr8 | 12942604 | 13083029 | 140426 | 3  | 0 | 5  | 0          | 0.30102999 | 0 | 4  | 0          | 0.11390336 |
| chr8 | 13083029 | 13083088 | 60     | 1  | 0 | 6  | 0          | 0.30102999 | 0 | 5  | 0          | 0.12309572 |
| chr8 | 13083088 | 13131825 | 48738  | 1  | 0 | 5  | 0          | 0.30102999 | 0 | 4  | 0          | 0.11390336 |
| chr8 | 13131825 | 13162770 | 30946  | 2  | 0 | 6  | 0          | 0.30102999 | 0 | 5  | 0          | 0.12309572 |
| chr8 | 13162770 | 13251151 | 88382  | 3  | 0 | 6  | 0          | 0.129913   | 0 | 7  | 0          | 0.30102999 |
| chr8 | 13251151 | 13357172 | 106022 | 3  | 0 | 8  | 0          | 0.13872638 | 0 | 9  | 0          | 0.30102999 |
| chr8 | 13357172 | 13357231 | 60     | 1  | 0 | 9  | 0          | 0.14135546 | 0 | 10 | 0          | 0.30102999 |
| chr8 | 13357231 | 13558023 | 200793 | 60 | 1 | 9  | 0          | 0.20975986 | 0 | 9  | 0          | 0.20975986 |
| chr8 | 13558023 | 13558082 | 60     | 1  | 0 | 9  | 0          | 0.20975986 | 1 | 9  | 0.30102999 | 0.20975986 |
| chr8 | 13558082 | 13828325 | 270244 | 1  | 0 | 9  | 0          | 0.20975986 | 0 | 9  | 0          | 0.20975986 |
| chr8 | 13828325 | 13947536 | 119212 | 2  | 0 | 10 | 0          | 0.14303407 | 0 | 11 | 0          | 0.30102999 |
| chr8 | 13947536 | 13978884 | 31349  | 2  | 0 | 12 | 0          | 0.14385241 | 0 | 13 | 0          | 0.30102999 |
| chr8 | 13978884 | 14062679 | 83796  | 4  | 0 | 11 | 0          | 0.09334429 | 0 | 13 | 0          | 0.41271556 |
| chr8 | 14062679 | 14226231 | 163553 | 4  | 0 | 11 | 0          | 0.14385241 | 0 | 12 | 0          | 0.30102999 |
| chr8 | 14226231 | 14308550 | 82320  | 2  | 0 | 10 | 0          | 0.09290028 | 0 | 12 | 0          | 0.41314172 |
| chr8 | 14308550 | 14834145 | 525596 | 14 | 0 | 11 | 0          | 0.14385241 | 0 | 12 | 0          | 0.30102999 |
| chr8 | 14834145 | 14921546 | 87402  | 2  | 0 | 11 | 0          | 0.21200206 | 0 | 11 | 0          | 0.21200206 |
| chr8 | 14921546 | 15000092 | 78547  | 2  | 0 | 11 | 0          | 0.14385241 | 0 | 12 | 0          | 0.30102999 |
| chr8 | 15000092 | 15093359 | 93268  | 4  | 0 | 11 | 0          | 0.09334429 | 0 | 13 | 0          | 0.41271556 |
| chr8 | 15093359 | 15149147 | 55789  | 2  | 0 | 12 | 0          | 0.14385241 | 0 | 13 | 0          | 0.30102999 |
| chr8 | 15149147 | 15480646 | 331500 | 3  | 0 | 9  | 0          | 0.0565833  | 0 | 12 | 0          | 0.55190077 |
| chr8 | 15480646 | 15480705 | 60     | 1  | 0 | 10 | 0          | 0.09290028 | 0 | 12 | 0          | 0.41314172 |
| chr8 | 15480705 | 15581080 | 100376 | 2  | 0 | 9  | 0          | 0.0565833  | 0 | 12 | 0          | 0.55190077 |
| chr8 | 15581080 | 15610795 | 29716  | 2  | 0 | 13 | 0          | 0.0331093  | 0 | 13 | 0          | 0.71538971 |
| chr8 | 15610795 | 15672380 | 61586  | 1  | 0 | 8  | 0          | 0.03209037 | 0 | 12 | 0          | 0.72109894 |
| chr8 | 15672380 | 15966905 | 294526 | 2  | 0 | 8  | 0          | 0.20764654 | 0 | 8  | 0          | 0.20764654 |
| chr8 | 15966905 | 16051358 | 84454  | 3  | 0 | 8  | 0          | 0.08923391 | 0 | 10 | 0          | 0.4167287  |
| chr8 | 16051358 | 16051417 | 60     | 1  | 0 | 8  | 0          | 0.05490675 | 0 | 11 | 0          | 0.55623409 |
| chr8 | 16051417 | 16100711 | 49295  | 1  | 0 | 8  | 0          | 0.08923391 | 0 | 10 | 0          | 0.4167287  |
| chr8 | 16100711 | 16100770 | 60     | 1  | 0 | 11 | 0          | 0.21200206 | 0 | 11 | 0          | 0.21200206 |
| chr8 | 16100770 | 16240968 | 140199 | 1  | 0 | 11 | 0          | 0.30102999 | 0 | 10 | 0          | 0.14303407 |
| chr8 | 16240968 | 16241027 | 60     | 1  | 0 | 11 | 0          | 0.21200206 | 0 | 11 | 0          | 0.21200206 |
| chr8 | 16241027 | 16416649 | 175623 | 1  | 0 | 9  | 0          | 0.20975986 | 0 | 9  | 0          | 0.20975986 |
| chr8 | 16416649 | 16416708 | 60     | 1  | 0 | 9  | 0          | 0.09154957 | 0 | 11 | 0          | 0.41444892 |
| chr8 | 16416708 | 16558744 | 142037 | 1  | 0 | 8  | 0          | 0.08923391 | 0 | 10 | 0          | 0.4167287  |
| chr8 | 16558744 | 16706628 | 147885 | 2  | 0 | 8  | 0          | 0.05490675 | 0 | 11 | 0          | 0.55623409 |
| chr8 | 16706628 | 16706687 | 60     | 1  | 0 | 9  | 0          | 0.0565833  | 0 | 12 | 0          | 0.55190077 |
| chr8 | 16706687 | 16850815 | 144129 | 1  | 0 | 9  | 0          | 0.09154957 | 0 | 11 | 0          | 0.41444892 |
| chr8 | 16850815 | 16935276 | 84462  | 2  | 0 | 9  | 0          | 0.05490675 | 0 | 11 | 0          | 0.55623409 |
| chr8 | 16935276 | 16963022 | 27747  | 2  | 0 | 9  | 0          | 0.09154957 | 0 | 11 | 0          | 0.41444892 |
| chr8 | 16963022 | 17183450 | 220429 | 6  | 0 | 8  | 0          | 0.05490675 | 0 | 11 | 0          | 0.55623409 |
| chr8 | 17183450 | 17183509 | 60     | 1  | 0 | 9  | 0          | 0.09154957 | 0 | 11 | 0          | 0.41444892 |
| chr8 | 17183509 | 17401992 | 218484 | 2  | 0 | 8  | 0          | 0.05490675 | 0 | 11 | 0          | 0.55623409 |
| chr8 | 17401992 | 17629688 | 227697 | 9  | 0 | 9  | 0          | 0.09154957 | 0 | 11 | 0          | 0.41444892 |
| chr8 | 17629688 | 17665600 |        |    |   |    |            |            |   |    |            |            |

|      |          |          |        |    |   |    |   |            |   |    |            |            |
|------|----------|----------|--------|----|---|----|---|------------|---|----|------------|------------|
| chr8 | 19873112 | 20056388 | 183277 | 4  | 0 | 8  | 0 | 0.13872638 | 0 | 9  | 0          | 0.30102999 |
| chr8 | 20056388 | 20165020 | 108633 | 4  | 0 | 9  | 0 | 0.20975986 | 0 | 0  | 0          | 0.20975986 |
| chr8 | 20165020 | 20468341 | 303322 | 3  | 0 | 8  | 0 | 0.13872638 | 0 | 9  | 0          | 0.30102999 |
| chr8 | 20468341 | 20690353 | 222013 | 1  | 0 | 8  | 0 | 0.20764654 | 0 | 8  | 0          | 0.20764654 |
| chr8 | 20690353 | 20690412 | 60     | 1  | 0 | 8  | 0 | 0.13872638 | 0 | 9  | 0          | 0.30102999 |
| chr8 | 20690412 | 20908353 | 217942 | 2  | 0 | 7  | 0 | 0.13499366 | 0 | 8  | 0          | 0.30102999 |
| chr8 | 20908353 | 21132854 | 224502 | 2  | 0 | 8  | 0 | 0.08923391 | 0 | 10 | 0          | 0.4167287  |
| chr8 | 21132854 | 21132913 | 60     | 1  | 0 | 9  | 0 | 0.09154957 | 0 | 11 | 0          | 0.41444892 |
| chr8 | 21132913 | 21242166 | 109254 | 1  | 0 | 7  | 0 | 0.05232577 | 0 | 10 | 0          | 0.56314362 |
| chr8 | 21242166 | 21493893 | 251728 | 2  | 0 | 6  | 0 | 0.02793176 | 0 | 10 | 0          | 0.74627054 |
| chr8 | 21493893 | 21577614 | 83722  | 2  | 0 | 7  | 0 | 0.00859896 | 0 | 13 | 0          | 1.14735594 |
| chr8 | 21577614 | 21820202 | 242589 | 6  | 0 | 8  | 0 | 0.00909834 | 0 | 14 | 0          | 1.13428373 |
| chr8 | 21820202 | 21883863 | 63662  | 3  | 0 | 8  | 0 | 0.01767679 | 0 | 13 | 0          | 0.91308053 |
| chr8 | 21883863 | 21883922 | 60     | 1  | 0 | 8  | 0 | 0.00909834 | 0 | 14 | 0          | 1.13428373 |
| chr8 | 21883922 | 21901426 | 17505  | 1  | 0 | 8  | 0 | 0.01767679 | 0 | 13 | 0          | 0.91308053 |
| chr8 | 21901426 | 21901478 | 53     | 1  | 0 | 9  | 0 | 0.01817691 | 0 | 14 | 0          | 0.90719478 |
| chr8 | 21901478 | 21964615 | 63138  | 5  | 0 | 8  | 0 | 0.03209037 | 0 | 12 | 0          | 0.72109894 |
| chr8 | 21964615 | 21964660 | 46     | 1  | 0 | 9  | 0 | 0.01817691 | 0 | 14 | 0          | 0.90719478 |
| chr8 | 21964660 | 21995524 | 30865  | 2  | 0 | 9  | 0 | 0.03510993 | 0 | 13 | 0          | 0.71538971 |
| chr8 | 21995524 | 22021055 | 25532  | 4  | 0 | 9  | 0 | 0.03817691 | 0 | 14 | 0          | 0.90719478 |
| chr8 | 22021055 | 22087590 | 66536  | 2  | 0 | 13 | 0 | 0.03103093 | 0 | 13 | 0          | 0.71538971 |
| chr8 | 22087590 | 22546205 | 45816  | 17 | 0 | 9  | 0 | 0.01817691 | 0 | 14 | 0          | 0.90719478 |
| chr8 | 22546205 | 22607913 | 61709  | 2  | 0 | 9  | 0 | 0.03103093 | 0 | 13 | 0          | 0.71538971 |
| chr8 | 22607913 | 22878680 | 270768 | 7  | 0 | 9  | 0 | 0.01817691 | 0 | 14 | 0          | 0.90719478 |
| chr8 | 22878680 | 22878739 | 60     | 1  | 0 | 10 | 0 | 0.03344703 | 0 | 14 | 0          | 0.71353304 |
| chr8 | 22878739 | 22959441 | 80703  | 3  | 0 | 9  | 0 | 0.01817691 | 0 | 14 | 0          | 0.90719478 |
| chr8 | 22959441 | 22995148 | 35708  | 2  | 0 | 8  | 0 | 0.00909834 | 0 | 14 | 0          | 1.13428373 |
| chr8 | 22995148 | 22995207 | 60     | 1  | 0 | 9  | 0 | 0.01817691 | 0 | 14 | 0          | 0.90719478 |
| chr8 | 22995207 | 23081265 | 86059  | 3  | 0 | 7  | 0 | 0.00413023 | 0 | 14 | 0          | 1.39918918 |
| chr8 | 23081265 | 23148333 | 67069  | 2  | 0 | 7  | 0 | 0.00859896 | 0 | 13 | 0          | 1.14735594 |
| chr8 | 23148333 | 23289322 | 140990 | 4  | 0 | 7  | 0 | 0.00183109 | 0 | 15 | 0          | 1.68336308 |
| chr8 | 23289322 | 23357497 | 68176  | 3  | 0 | 8  | 0 | 0.00433294 | 0 | 15 | 0          | 1.3873209  |
| chr8 | 23357497 | 23427849 | 70353  | 3  | 0 | 9  | 0 | 0.00926608 | 0 | 15 | 0          | 1.13004284 |
| chr8 | 23427849 | 23466216 | 38368  | 1  | 0 | 8  | 0 | 0.00433294 | 0 | 15 | 0          | 1.3873209  |
| chr8 | 23466216 | 23539339 | 73124  | 1  | 0 | 6  | 0 | 0.00778066 | 0 | 12 | 0          | 1.17038931 |
| chr8 | 23539339 | 23614962 | 75624  | 2  | 0 | 7  | 0 | 0.01667721 | 0 | 12 | 0          | 0.92532268 |
| chr8 | 23614962 | 23643346 | 28385  | 2  | 0 | 8  | 0 | 0.00909834 | 0 | 14 | 0          | 1.13428373 |
| chr8 | 23643346 | 23827988 | 184643 | 3  | 0 | 7  | 0 | 0.00859896 | 0 | 13 | 0          | 1.14735594 |
| chr8 | 23827988 | 23828047 | 60     | 1  | 0 | 8  | 0 | 0.00909834 | 0 | 14 | 0          | 1.13428373 |
| chr8 | 23828047 | 23947786 | 119740 | 1  | 0 | 8  | 0 | 0.05490675 | 0 | 11 | 0          | 0.55623409 |
| chr8 | 23947786 | 24036657 | 88872  | 2  | 0 | 9  | 0 | 0.09154957 | 0 | 11 | 0          | 0.41444892 |
| chr8 | 24036657 | 24036716 | 60     | 1  | 0 | 10 | 0 | 0.05740087 | 0 | 13 | 0          | 0.5498098  |
| chr8 | 24036716 | 24168873 | 132158 | 2  | 0 | 8  | 0 | 0.05490675 | 0 | 11 | 0          | 0.55623409 |
| chr8 | 24168873 | 24168932 | 60     | 1  | 0 | 9  | 0 | 0.09154957 | 0 | 11 | 0          | 0.41444892 |
| chr8 | 24168932 | 24263232 | 94301  | 2  | 0 | 8  | 0 | 0.05490675 | 0 | 11 | 0          | 0.55623409 |
| chr8 | 24263232 | 24304724 | 41493  | 2  | 0 | 9  | 0 | 0.09154957 | 0 | 11 | 0          | 0.41444892 |
| chr8 | 24304724 | 24351287 | 46564  | 2  | 0 | 9  | 0 | 0.01817691 | 0 | 14 | 0          | 0.90719478 |
| chr8 | 24351287 | 24351346 | 60     | 1  | 0 | 10 | 0 | 0.03344703 | 0 | 14 | 0          | 0.71353304 |
| chr8 | 24351346 | 24384376 | 33031  | 1  | 0 | 10 | 0 | 0.05740087 | 0 | 13 | 0          | 0.5498098  |
| chr8 | 24384376 | 24493086 | 108711 | 1  | 0 | 9  | 0 | 0.0565833  | 0 | 12 | 0          | 0.55190077 |
| chr8 | 24493086 | 24610445 | 117360 | 2  | 0 | 9  | 0 | 0.0331093  | 0 | 13 | 0          | 0.71538971 |
| chr8 | 24610445 | 24773595 | 163151 | 1  | 0 | 9  | 0 | 0.20975986 | 0 | 9  | 0          | 0.20975986 |
| chr8 | 24773595 | 24811819 | 38225  | 4  | 0 | 9  | 0 | 0.14135546 | 0 | 10 | 0          | 0.30102999 |
| chr8 | 24811819 | 24918107 | 106289 | 1  | 0 | 9  | 0 | 0.20975986 | 0 | 9  | 0          | 0.20975986 |
| chr8 | 24918107 | 25190093 | 271987 | 5  | 0 | 9  | 0 | 0.0565833  | 0 | 12 | 0          | 0.55190077 |
| chr8 | 25190093 | 25190152 | 60     | 1  | 0 | 10 | 0 | 0.09290028 | 0 | 12 | 0          | 0.41314172 |
| chr8 | 25190152 | 25323072 | 132921 | 4  | 0 | 10 | 0 | 0.14303407 | 0 | 11 | 0          | 0.30102999 |
| chr8 | 25323072 | 25323131 | 60     | 1  | 0 | 10 | 0 | 0.09290028 | 0 | 12 | 0          | 0.41314172 |
| chr8 | 25323131 | 25364736 | 41606  | 2  | 0 | 9  | 0 | 0.0565833  | 0 | 12 | 0          | 0.55190077 |
| chr8 | 25364736 | 25399721 | 34986  | 1  | 0 | 9  | 0 | 0.09154957 | 0 | 11 | 0          | 0.41444892 |
| chr8 | 25399721 | 25482789 | 83069  | 2  | 0 | 9  | 0 | 0.14135546 | 0 | 10 | 0          | 0.30102999 |
| chr8 | 25482789 | 25605849 | 123061 | 2  | 0 | 9  | 0 | 0.20975986 | 0 | 9  | 0          | 0.20975986 |
| chr8 | 25605849 | 25745312 | 139464 | 4  | 0 | 10 | 0 | 0.09290028 | 0 | 12 | 0          | 0.41314172 |
| chr8 | 25745312 | 25889490 | 144179 | 2  | 0 | 9  | 0 | 0.14135546 | 0 | 10 | 0          | 0.30102999 |
| chr8 | 25889490 | 25889549 | 60     | 1  | 0 | 9  | 0 | 0.09154957 | 0 | 11 | 0          | 0.41444892 |
| chr8 | 25889549 | 25895736 | 106188 | 2  | 0 | 10 | 0 | 0.14135546 | 0 | 10 | 0          | 0.30102999 |
| chr8 | 25895736 | 26102739 | 107004 | 2  | 0 | 9  | 0 | 0.20975986 | 0 | 9  | 0          | 0.20975986 |
| chr8 | 26102739 | 26102798 | 60     | 1  | 0 | 10 | 0 | 0.14303407 | 0 | 11 | 0          | 0.30102999 |
| chr8 | 26102798 | 26162268 | 59471  | 1  | 0 | 9  | 0 | 0.09154957 | 0 | 11 | 0          | 0.41444892 |
| chr8 | 26162268 | 26196470 | 34203  | 1  | 0 | 9  | 0 | 0.14135546 | 0 | 10 | 0          | 0.30102999 |
| chr8 | 26196470 | 26196529 | 60     | 1  | 0 | 11 | 0 | 0.30102999 | 0 | 10 | 0          | 0.14303407 |
| chr8 | 26196529 | 26265643 | 69115  | 2  | 0 | 10 | 0 | 0.21118145 | 0 | 10 | 0          | 0.21118145 |
| chr8 | 26265643 | 26584168 | 318526 | 5  | 0 | 9  | 0 | 0.20975986 | 0 | 9  | 0          | 0.20975986 |
| chr8 | 26584168 | 26584227 | 60     | 1  | 0 | 10 | 0 | 0.30102999 | 0 | 9  | 0          | 0.14135546 |
| chr8 | 26584227 | 26655855 | 71629  | 2  | 0 | 8  | 0 | 0.13872638 | 0 | 9  | 0          | 0.30102999 |
| chr8 | 26655855 | 26707917 | 52063  | 1  | 0 | 8  | 0 | 0.20764654 | 0 | 8  | 0          | 0.20764654 |
| chr8 | 26707917 | 26707976 | 60     | 1  | 0 | 9  | 0 | 0.30102999 | 0 | 8  | 0          | 0.13872638 |
| chr8 | 26707976 | 26876978 | 169003 | 2  | 0 | 9  | 0 | 0.42015402 | 0 | 7  | 0          | 0.08584816 |
| chr8 | 26876978 | 26978519 | 101542 | 3  | 0 | 9  | 0 | 0.20975986 | 0 | 9  | 0          | 0.20975986 |
| chr8 | 26978519 | 27040563 | 62045  | 1  | 0 | 9  | 0 | 0.30102999 | 0 | 8  | 0          | 0.13872638 |
| chr8 | 27040563 | 27098086 | 57524  | 2  | 0 | 10 | 0 | 0.4167287  | 0 | 8  | 0          | 0.08923391 |
| chr8 | 27098086 | 27143694 | 45609  | 1  | 0 | 9  | 0 | 0.42015402 | 0 | 7  | 0          | 0.08584816 |
| chr8 | 27143694 | 27162783 | 19090  | 1  | 0 | 7  | 0 | 0.20469099 | 0 | 7  | 0          | 0.20469099 |
| chr8 | 27162783 | 27227862 | 65080  | 3  | 0 | 7  | 0 | 0.13499366 | 0 | 8  | 0          | 0.30102999 |
| chr8 | 27227862 | 27319856 | 91995  | 4  | 0 | 10 | 0 | 0.30102999 | 0 | 9  | 0          | 0.14135546 |
| chr8 | 27319856 | 27402336 | 82481  | 2  | 0 | 9  | 0 | 0.20975986 | 0 | 9  | 0          | 0.20975986 |
| chr8 | 27402336 | 27402395 | 60     | 1  | 0 | 10 | 0 | 0.30102999 | 0 | 9  | 0          | 0.14135546 |
| chr8 | 27402395 | 27499756 | 97362  | 4  | 0 | 9  | 0 | 0.20975986 | 0 | 9  | 0          | 0.20975986 |
| chr8 | 27499756 | 27530515 | 30760  | 1  | 0 | 8  | 0 | 0.13872638 | 0 | 9  | 0          | 0.30102999 |
| chr8 | 27530515 | 27579235 | 48721  | 1  | 0 | 8  | 0 | 0.20764654 | 0 | 8  | 0          | 0.20764654 |
| chr8 | 27579235 | 27614313 | 35079  | 2  | 0 | 8  | 0 | 0.20764654 | 1 | 8  | 0.30102999 | 0.20764654 |
| chr8 | 27614313 | 27667902 | 53590  | 1  | 0 | 8  | 0 | 0.20764654 | 0 | 8  | 0          | 0.20764654 |
| chr8 | 27667902 | 27667961 | 60     | 1  | 0 | 8  | 0 | 0.13872638 | 0 | 9  | 0          | 0.30102999 |
| chr8 | 27667961 | 27711797 | 43837  | 2  | 0 | 8  | 0 | 0.20764654 | 0 | 8  | 0          | 0.20764654 |
| chr8 | 27711797 | 27711856 | 60     | 1  | 0 | 10 | 0 | 0.4167287  | 0 | 8  | 0          | 0.08923391 |
| chr8 | 27711856 | 27846302 | 134447 | 3  | 0 | 9  | 0 | 0.30102999 | 0 | 8  | 0          | 0.13872638 |
| chr8 | 27846302 | 27886331 | 40030  | 2  | 0 | 10 | 0 | 0.4167287  | 0 | 8  | 0          | 0.08923391 |
| chr8 | 27886331 | 27886390 | 60     | 1  | 0 | 10 | 0 | 0.30102999 | 0 | 9  | 0          | 0.14135546 |
| chr8 | 27886390 | 28047665 | 161276 | 4  | 0 | 8  | 0 | 0.13872638 | 0 | 9  | 0          | 0.30102999 |
| chr8 | 28047665 | 28240972 | 193308 | 7  | 0 | 8  | 0 | 0.20764654 | 0 | 8  | 0          | 0.20764654 |
| chr8 | 28240972 | 28241031 | 60     | 1  | 0 | 9  | 0 | 0.30102999 | 0 | 8  | 0          | 0.13872638 |
| chr8 | 28241031 | 28340940 | 99910  | 2  | 0 | 7  | 0 | 0.13499366 | 0 | 8  | 0          | 0.30102999 |
| chr8 | 28340940 | 28421560 | 80621  | 3  | 0 | 8  |   |            |   |    |            |            |

|      |          |            |         |    |   |    |            |            |   |    |            |             |
|------|----------|------------|---------|----|---|----|------------|------------|---|----|------------|-------------|
| chr8 | 30021700 | 30066728   | 45029   | 1  | 0 | 5  | 0          | 0.19510895 | 1 | 5  | 0.30102999 | 0.19510895  |
| chr8 | 30066728 | 30243957   | 172730  | 3  | 0 | 6  | 0          | 0.30102999 | 1 | 5  | 0.30102999 | 0.12309572  |
| chr8 | 30243957 | 30469997   | 226041  | 8  | 0 | 8  | 0          | 0.58747015 | 1 | 5  | 0.30102999 | 0.04407651  |
| chr8 | 30469997 | 30511086   | 41900   | 1  | 0 | 7  | 0          | 0.43181735 | 1 | 5  | 0.30102999 | 0.07511598  |
| chr8 | 30511086 | 30567333   | 56248   | 3  | 0 | 8  | 0          | 0.58747015 | 1 | 5  | 0.30102999 | 0.04407651  |
| chr8 | 30567333 | 30567389   | 57      | 1  | 0 | 8  | 0          | 0.4250187  | 1 | 6  | 0.30102999 | 0.08122616  |
| chr8 | 30567389 | 30666890   | 99502   | 2  | 0 | 8  | 0          | 0.58747015 | 1 | 5  | 0.30102999 | 0.04407651  |
| chr8 | 30666890 | 30853483   | 186594  | 4  | 0 | 8  | 0          | 0.30102999 | 1 | 7  | 0.30102999 | 0.13499366  |
| chr8 | 30853483 | 30853542   | 60      | 1  | 0 | 9  | 0          | 0.42015402 | 1 | 7  | 0.30102999 | 0.08584816  |
| chr8 | 30853542 | 30921916   | 68375   | 3  | 0 | 8  | 0          | 0.30102999 | 0 | 7  | 0.30102999 | 0.13499366  |
| chr8 | 30921916 | 30921975   | 60      | 1  | 0 | 9  | 0          | 0.30102999 | 0 | 8  | 0          | 0.13872638  |
| chr8 | 30921975 | 30973984   | 52010   | 1  | 0 | 9  | 0          | 0.42015402 | 0 | 7  | 0          | 0.08584816  |
| chr8 | 30973984 | 31031059   | 57076   | 3  | 0 | 9  | 0          | 0.56314362 | 0 | 7  | 0          | 0.05232577  |
| chr8 | 31031059 | 31158406   | 127348  | 2  | 0 | 12 | 0          | 0.72109894 | 1 | 8  | 0.30102999 | 0.03209037  |
| chr8 | 31158406 | 31396934   | 238529  | 2  | 0 | 12 | 0          | 0.55190077 | 1 | 9  | 0.30102999 | 0.0565833   |
| chr8 | 31396934 | 31396993   | 60      | 1  | 0 | 12 | 0          | 0.41314172 | 1 | 10 | 0.30102999 | 0.092590028 |
| chr8 | 31396993 | 31497313   | 100321  | 2  | 0 | 11 | 0          | 0.30102999 | 1 | 10 | 0.30102999 | 0.14303407  |
| chr8 | 31497313 | 31650428   | 153116  | 3  | 0 | 10 | 0          | 0.21118145 | 1 | 10 | 0.30102999 | 0.21118145  |
| chr8 | 31650428 | 31787247   | 136820  | 4  | 0 | 11 | 0          | 0.30102999 | 1 | 10 | 0.30102999 | 0.14303407  |
| chr8 | 31787247 | 31874423   | 87177   | 2  | 0 | 10 | 0          | 0.21118145 | 1 | 10 | 0.30102999 | 0.21118145  |
| chr8 | 31874423 | 31874482   | 60      | 1  | 0 | 11 | 0          | 0.30102999 | 1 | 10 | 0.30102999 | 0.14303407  |
| chr8 | 31874482 | 31920148   | 45667   | 1  | 0 | 10 | 0          | 0.21118145 | 1 | 10 | 0.30102999 | 0.21118145  |
| chr8 | 31920148 | 31973643   | 53496   | 2  | 0 | 11 | 0          | 0.30102999 | 1 | 10 | 0.30102999 | 0.14303407  |
| chr8 | 31973643 | 32005107   | 31465   | 1  | 0 | 10 | 0          | 0.30102999 | 1 | 9  | 0.30102999 | 0.14135546  |
| chr8 | 32005107 | 32067028   | 61922   | 1  | 0 | 9  | 0          | 0.20975986 | 1 | 9  | 0.30102999 | 0.20975986  |
| chr8 | 32067028 | 32067087   | 60      | 1  | 1 | 9  | 0.1218695  | 0.14135546 | 1 | 10 | 0.1218695  | 0.30102999  |
| chr8 | 32067087 | 32132178   | 65092   | 1  | 1 | 9  | 0.1218695  | 0.20975986 | 1 | 9  | 0.1218695  | 0.20975986  |
| chr8 | 32132178 | 32132237   | 60      | 1  | 1 | 10 | 0.1218695  | 0.30102999 | 1 | 9  | 0.1218695  | 0.14135546  |
| chr8 | 32132237 | 32282892   | 150656  | 3  | 1 | 9  | 0.1218695  | 0.20975986 | 1 | 9  | 0.1218695  | 0.20975986  |
| chr8 | 32282892 | 32282951   | 60      | 1  | 1 | 11 | 0.1218695  | 0.41448892 | 1 | 9  | 0.1218695  | 0.09154957  |
| chr8 | 32282951 | 32380233   | 97283   | 2  | 1 | 10 | 0.1218695  | 0.30102999 | 1 | 9  | 0.1218695  | 0.14135546  |
| chr8 | 32380233 | 32380292   | 60      | 1  | 1 | 10 | 0.1218695  | 0.21118145 | 1 | 10 | 0.1218695  | 0.21118145  |
| chr8 | 32380292 | 32502397   | 122106  | 2  | 1 | 9  | 0.1218695  | 0.20975986 | 1 | 9  | 0.1218695  | 0.20975986  |
| chr8 | 32502397 | 32543147   | 40751   | 2  | 1 | 9  | 0.1218695  | 0.14135546 | 1 | 10 | 0.1218695  | 0.30102999  |
| chr8 | 32543147 | 32586023   | 42877   | 1  | 1 | 7  | 0.1218695  | 0.08584816 | 1 | 9  | 0.1218695  | 0.42015402  |
| chr8 | 32586023 | 32666749   | 80727   | 1  | 1 | 5  | 0.1218695  | 0.02473314 | 1 | 9  | 0.1218695  | 0.76806864  |
| chr8 | 32666749 | 32817154   | 150406  | 2  | 1 | 3  | 0.1218695  | 0.0079614  | 1 | 8  | 0.1218695  | 1.07548421  |
| chr8 | 32817154 | 32859696   | 42543   | 2  | 1 | 3  | 0.05404976 | 0.0079614  | 2 | 8  | 0.30102999 | 1.07548421  |
| chr8 | 32859696 | 32859755   | 60      | 1  | 1 | 3  | 0.05404976 | 0.00170589 | 2 | 10 | 0.30102999 | 1.61091002  |
| chr8 | 32859755 | 32923289   | 63535   | 1  | 1 | 3  | 0.05404976 | 0.00378107 | 2 | 9  | 0.30102999 | 1.33111237  |
| chr8 | 32923289 | 33119221   | 195933  | 1  | 1 | 3  | 0.1218695  | 0.01598258 | 1 | 7  | 0.1218695  | 0.84395715  |
| chr8 | 33119221 | 33254022   | 134802  | 3  | 1 | 2  | 0.1218695  | 0.01053319 | 1 | 6  | 0.1218695  | 0.91239088  |
| chr8 | 33254022 | 34639082   | 1385061 | 16 | 1 | 1  | 0.1218695  | 0.00478973 | 1 | 5  | 0.1218695  | 1.02643191  |
| chr8 | 34639082 | 34714943   | 75862   | 2  | 1 | 5  | 0.1218695  | 0.07511598 | 1 | 7  | 0.1218695  | 0.43181735  |
| chr8 | 34714943 | 34715002   | 60      | 1  | 1 | 6  | 0.1218695  | 0.129913   | 1 | 7  | 0.1218695  | 0.30102999  |
| chr8 | 34715002 | 35167151   | 452150  | 5  | 1 | 5  | 0.1218695  | 0.12309572 | 1 | 6  | 0.1218695  | 0.30102999  |
| chr8 | 35167151 | 35167210   | 60      | 1  | 1 | 7  | 0.1218695  | 0.13499366 | 1 | 8  | 0.1218695  | 0.30102999  |
| chr8 | 35167210 | 35268882   | 101673  | 2  | 1 | 5  | 0.30102999 | 0.12309572 | 0 | 6  | 0          | 0.30102999  |
| chr8 | 35268882 | 35410653   | 141772  | 4  | 1 | 7  | 0.1218695  | 0.13499366 | 1 | 8  | 0.1218695  | 0.30102999  |
| chr8 | 35410653 | 35620127   | 209475  | 6  | 1 | 7  | 0.1218695  | 0.08584816 | 1 | 9  | 0.1218695  | 0.42015402  |
| chr8 | 35620127 | 35698220   | 78094   | 1  | 1 | 7  | 0.1218695  | 0.13499366 | 1 | 8  | 0.1218695  | 0.30102999  |
| chr8 | 35698220 | 35907864   | 209645  | 1  | 1 | 6  | 0.1218695  | 0.08122616 | 1 | 8  | 0.1218695  | 0.4250187   |
| chr8 | 35907864 | 36014509   | 106646  | 2  | 2 | 9  | 0.30102999 | 0.20975986 | 1 | 9  | 0.05404976 | 0.20975986  |
| chr8 | 36014509 | 36149008   | 134500  | 1  | 2 | 7  | 0.61140001 | 0.20469099 | 0 | 7  | 0          | 0.20469099  |
| chr8 | 36149008 | 36361881   | 212874  | 2  | 2 | 5  | 0.61140001 | 0.07511598 | 0 | 7  | 0          | 0.43181735  |
| chr8 | 36361881 | 36361940   | 60      | 1  | 2 | 7  | 0.61140001 | 0.08584816 | 0 | 9  | 0          | 0.42015402  |
| chr8 | 36361940 | 36622844   | 260905  | 2  | 1 | 4  | 0.30102999 | 0.06713722 | 0 | 6  | 0          | 0.44141547  |
| chr8 | 36622844 | 36622903   | 60      | 1  | 1 | 6  | 0.30102999 | 0.08122616 | 0 | 8  | 0          | 0.4250187   |
| chr8 | 36622903 | 36703080   | 80178   | 2  | 1 | 3  | 0.30102999 | 0.05670724 | 0 | 5  | 0          | 0.45545077  |
| chr8 | 36703080 | 36746755   | 43676   | 2  | 2 | 3  | 0.61140001 | 0.05670724 | 0 | 5  | 0          | 0.45545077  |
| chr8 | 36746755 | 36746814   | 60      | 1  | 2 | 4  | 0.30102999 | 0.3812622  | 1 | 7  | 0.05404976 | 0.60763643  |
| chr8 | 36746814 | 36854135   | 107322  | 2  | 2 | 3  | 0.30102999 | 0.03070643 | 1 | 6  | 0.05404976 | 0.63695542  |
| chr8 | 36854135 | 36854194   | 60      | 1  | 3 | 4  | 0.30102999 | 0.06713722 | 2 | 6  | 0.08289318 | 0.44141547  |
| chr8 | 36854194 | 37032208   | 178015  | 1  | 3 | 4  | 0.30102999 | 0.30102999 | 2 | 3  | 0.08289318 | 0.10122019  |
| chr8 | 37032208 | 37228320   | 196113  | 2  | 4 | 4  | 0.47714471 | 0.30102999 | 2 | 3  | 0.0429175  | 0.10122019  |
| chr8 | 37228320 | 37419308   | 190989  | 2  | 4 | 4  | 0.18734596 | 0.30102999 | 4 | 3  | 0.18734596 | 0.10122019  |
| chr8 | 37419308 | 37538561   | 119254  | 5  | 4 | 4  | 0.30102999 | 0.30102999 | 4 | 3  | 0.11390336 | 0.10122019  |
| chr8 | 37538561 | 37596744   | 58184   | 2  | 5 | 5  | 0.30102999 | 0.45545077 | 4 | 3  | 0.11390336 | 0.05670724  |
| chr8 | 37596744 | 37627128   | 30385   | 2  | 5 | 5  | 0.30102999 | 0.30102999 | 4 | 4  | 0.11390336 | 0.11390336  |
| chr8 | 37627128 | 37662934   | 35807   | 2  | 5 | 5  | 0.19510895 | 0.30102999 | 5 | 4  | 0.19510895 | 0.11390336  |
| chr8 | 37662934 | 37727921   | 64988   | 2  | 5 | 3  | 0.19510895 | 0.10122019 | 5 | 4  | 0.19510895 | 0.30102999  |
| chr8 | 37727921 | 37792736   | 64816   | 2  | 5 | 3  | 0.12309572 | 0.10122019 | 5 | 4  | 0.30102999 | 0.30102999  |
| chr8 | 37792736 | 37827202   | 34467   | 2  | 5 | 2  | 0.12309572 | 0.0429175  | 6 | 5  | 0.30102999 | 0.47744371  |
| chr8 | 37827202 | 37903880   | 76679   | 1  | 5 | 2  | 0.19510895 | 0.0429175  | 5 | 4  | 0.19510895 | 0.47744371  |
| chr8 | 37903880 | 38061694   | 157815  | 7  | 5 | 4  | 0.12309572 | 0.18734596 | 6 | 4  | 0.30102999 | 0.18734596  |
| chr8 | 38061694 | 38061753   | 60      | 1  | 5 | 4  | 0.07511598 | 0.18734596 | 7 | 4  | 0.43181735 | 0.18734596  |
| chr8 | 38061753 | 38105379   | 43627   | 1  | 5 | 3  | 0.07511598 | 0.10122019 | 7 | 4  | 0.43181735 | 0.30102999  |
| chr8 | 38105379 | 38133227   | 27849   | 5  | 6 | 3  | 0.129913   | 0.10122019 | 7 | 4  | 0.30102999 | 0.30102999  |
| chr8 | 38133227 | 38157045   | 23819   | 1  | 5 | 3  | 0.07511598 | 0.10122019 | 7 | 4  | 0.43181735 | 0.30102999  |
| chr8 | 38157045 | 38226918   | 69874   | 2  | 5 | 3  | 0.12309572 | 0.10122019 | 6 | 4  | 0.30102999 | 0.30102999  |
| chr8 | 38226918 | 38298466   | 71549   | 3  | 5 | 3  | 0.19510895 | 0.10122019 | 5 | 4  | 0.19510895 | 0.30102999  |
| chr8 | 38298466 | 38366279   | 67814   | 5  | 5 | 3  | 0.07511598 | 0.10122019 | 7 | 4  | 0.43181735 | 0.30102999  |
| chr8 | 38366279 | 38430838   | 64560   | 2  | 5 | 3  | 0.07511598 | 0.05670724 | 7 | 5  | 0.43181735 | 0.45545077  |
| chr8 | 38430838 | 38665576   | 234739  | 6  | 6 | 3  | 0.08122616 | 0.05670724 | 8 | 5  | 0.4250187  | 0.45545077  |
| chr8 | 38665576 | 38764939   | 9964    | 3  | 6 | 4  | 0.08122616 | 0.11390336 | 5 | 5  | 0.4250187  | 0.30102999  |
| chr8 | 38764939 | 38840455   | 75517   | 1  | 5 | 3  | 0.07511598 | 0.05670724 | 7 | 5  | 0.43181735 | 0.45545077  |
| chr8 | 38840455 | 38899473   | 59019   | 7  | 5 | 4  | 0.07511598 | 0.11390336 | 7 | 5  | 0.43181735 | 0.30102999  |
| chr8 | 38899473 | 38899532   | 60      | 1  | 5 | 4  | 0.04407651 | 0.11390336 | 8 | 5  | 0.58747015 | 0.30102999  |
| chr8 | 38899532 | 39008931   | 109400  | 2  | 5 | 4  | 0.07511598 | 0.11390336 | 7 | 5  | 0.43181735 | 0.30102999  |
| chr8 | 39008931 | 39008990   | 60      | 1  | 5 | 4  | 0.04407651 | 0.11390336 | 8 | 5  | 0.58747015 | 0.30102999  |
| chr8 | 39008990 | 39068643   | 59654   | 1  | 5 | 4  | 0.07511598 | 0.11390336 | 7 | 5  | 0.43181735 | 0.30102999  |
| chr8 | 39068643 | 39103677   | 35035   | 2  | 5 | 5  | 0.07511598 | 0.19510895 | 5 | 5  | 0.43181735 | 0.19510895  |
| chr8 | 39103677 | 39309648</ |         |    |   |    |            |            |   |    |            |             |

|      |          |          |        |    |   |   |            |            |    |   |            |            |
|------|----------|----------|--------|----|---|---|------------|------------|----|---|------------|------------|
| chr8 | 41387705 | 41559087 | 171383 | 7  | 4 | 3 | 0.11390336 | 0.30102999 | 5  | 2 | 0.30102999 | 0.08289318 |
| chr8 | 41559087 | 41559138 | 52     | 1  | 5 | 3 | 0.19510895 | 0.30102999 | 5  | 2 | 0.19510895 | 0.08289318 |
| chr8 | 41559138 | 41653582 | 94445  | 2  | 4 | 3 | 0.11390336 | 0.30102999 | 5  | 2 | 0.30102999 | 0.08289318 |
| chr8 | 41653582 | 41653641 | 60     | 1  | 4 | 3 | 0.11390336 | 0.17593012 | 5  | 3 | 0.30102999 | 0.17593012 |
| chr8 | 41653641 | 41690380 | 36740  | 1  | 4 | 3 | 0.11390336 | 0.30102999 | 5  | 2 | 0.30102999 | 0.08289318 |
| chr8 | 41690380 | 41690439 | 60     | 1  | 4 | 3 | 0.06713722 | 0.30102999 | 6  | 2 | 0.44141547 | 0.08289318 |
| chr8 | 41690439 | 41735639 | 45201  | 1  | 4 | 3 | 0.06713722 | 0.51676182 | 6  | 1 | 0.44141547 | 0.02438896 |
| chr8 | 41735639 | 41735698 | 60     | 1  | 5 | 3 | 0.12309572 | 0.51676182 | 6  | 1 | 0.30102999 | 0.02438896 |
| chr8 | 41735698 | 41792326 | 56629  | 1  | 4 | 3 | 0.06713722 | 0.51676182 | 6  | 1 | 0.44141547 | 0.02438896 |
| chr8 | 41792326 | 41850544 | 58219  | 3  | 4 | 3 | 0.06713722 | 0.30102999 | 6  | 2 | 0.44141547 | 0.08289318 |
| chr8 | 41850544 | 41850603 | 60     | 1  | 4 | 3 | 0.06713722 | 0.17593012 | 6  | 3 | 0.44141547 | 0.17593012 |
| chr8 | 41850603 | 42056223 | 205621 | 5  | 4 | 3 | 0.06713722 | 0.30102999 | 6  | 2 | 0.44141547 | 0.08289318 |
| chr8 | 42056223 | 42056282 | 60     | 1  | 5 | 3 | 0.12309572 | 0.30102999 | 6  | 2 | 0.30102999 | 0.08289318 |
| chr8 | 47681335 | 47681394 | 60     | 1  | 4 | 0 | 0.11390336 | 0          | 5  | 0 | 0.30102999 | 0          |
| chr8 | 47681394 | 47868796 | 187403 | 1  | 3 | 0 | 0.05670724 | 0          | 5  | 0 | 0.45545077 | 0          |
| chr8 | 47868796 | 47948697 | 79902  | 2  | 3 | 1 | 0.03070643 | 0.30102999 | 6  | 0 | 0.63695542 | 0          |
| chr8 | 47948697 | 47948756 | 60     | 1  | 5 | 1 | 0.12309572 | 0.30102999 | 6  | 0 | 0.30102999 | 0          |
| chr8 | 47948756 | 48274815 | 326060 | 6  | 3 | 1 | 0.03070643 | 0.30102999 | 6  | 0 | 0.63695542 | 0          |
| chr8 | 48274815 | 48487662 | 212848 | 5  | 4 | 1 | 0.06713722 | 0.30102999 | 6  | 0 | 0.44141547 | 0          |
| chr8 | 48487662 | 48547114 | 59453  | 2  | 4 | 1 | 0.03812622 | 0.30102999 | 7  | 0 | 0.60763643 | 0          |
| chr8 | 48547114 | 48962388 | 415275 | 14 | 4 | 1 | 0.01077081 | 0.30102999 | 9  | 0 | 1.01542894 | 0          |
| chr8 | 48962388 | 49091300 | 128913 | 2  | 4 | 1 | 0.00247414 | 0.30102999 | 11 | 0 | 1.52371709 | 0          |
| chr8 | 49091300 | 49091359 | 60     | 1  | 4 | 1 | 0.00317045 | 0.30102999 | 12 | 0 | 1.46403142 | 0          |
| chr8 | 49091359 | 49330207 | 238849 | 2  | 4 | 1 | 0.00530919 | 0.30102999 | 10 | 0 | 1.258129   | 0          |
| chr8 | 49330207 | 49534174 | 203968 | 2  | 3 | 1 | 0.01598258 | 0.30102999 | 7  | 0 | 0.84395715 | 0          |
| chr8 | 49534174 | 49623026 | 88853  | 1  | 3 | 1 | 0.03070643 | 0.30102999 | 6  | 0 | 0.63695542 | 0          |
| chr8 | 49623026 | 49646409 | 23384  | 3  | 3 | 1 | 0.03070643 | 0.1218695  | 6  | 1 | 0.63695542 | 0.1218695  |
| chr8 | 49646409 | 49830999 | 184591 | 3  | 1 | 1 | 0.10122019 | 0.1218695  | 4  | 1 | 0.30102999 | 0.1218695  |
| chr8 | 49830999 | 49990465 | 159467 | 2  | 3 | 1 | 0.17593012 | 0.30102999 | 3  | 0 | 0.17593012 | 0          |
| chr8 | 49990465 | 50253137 | 262673 | 2  | 2 | 1 | 0.08289318 | 0.30102999 | 3  | 0 | 0.30102999 | 0          |
| chr8 | 50253137 | 50447771 | 194635 | 2  | 3 | 1 | 0.17593012 | 0.30102999 | 3  | 0 | 0.17593012 | 0          |
| chr8 | 50447771 | 50968855 | 521085 | 8  | 3 | 1 | 0.17593012 | 0.1218695  | 3  | 1 | 0.17593012 | 0.1218695  |
| chr8 | 50968855 | 51078336 | 109482 | 2  | 3 | 0 | 0.17593012 | 0          | 3  | 0 | 0.17593012 | 0          |
| chr8 | 51078336 | 51245330 | 166995 | 4  | 3 | 1 | 0.17593012 | 0.1218695  | 3  | 1 | 0.17593012 | 0.1218695  |
| chr8 | 51245330 | 51362233 | 116904 | 2  | 3 | 1 | 0.17593012 | 0.30102999 | 3  | 0 | 0.17593012 | 0          |
| chr8 | 51362233 | 51395140 | 32908  | 2  | 3 | 1 | 0.17593012 | 0.1218695  | 3  | 1 | 0.17593012 | 0.1218695  |
| chr8 | 51395140 | 51543169 | 148030 | 4  | 3 | 1 | 0.17593012 | 0.30102999 | 3  | 0 | 0.17593012 | 0          |
| chr8 | 51543169 | 51640761 | 97593  | 3  | 1 | 1 | 0.10122019 | 0.30102999 | 4  | 0 | 0.30102999 | 0          |
| chr8 | 51640761 | 52570948 | 930188 | 12 | 3 | 1 | 0.05670724 | 0.30102999 | 5  | 0 | 0.45545077 | 0          |
| chr8 | 52570948 | 52672673 | 101726 | 3  | 3 | 1 | 0.03070643 | 0.30102999 | 6  | 0 | 0.63695542 | 0          |
| chr8 | 52672673 | 52672732 | 60     | 1  | 4 | 1 | 0.03812622 | 0.30102999 | 7  | 0 | 0.60763643 | 0          |
| chr8 | 52672732 | 52714573 | 41842  | 4  | 1 | 1 | 0.06713722 | 0.30102999 | 6  | 0 | 0.44141547 | 0          |
| chr8 | 52714573 | 53024779 | 310207 | 7  | 5 | 1 | 0.12309572 | 0.30102999 | 6  | 0 | 0.30102999 | 0          |
| chr8 | 53024779 | 53133343 | 108565 | 2  | 4 | 1 | 0.06713722 | 0.30102999 | 6  | 0 | 0.44141547 | 0          |
| chr8 | 53133343 | 53273925 | 140583 | 5  | 5 | 1 | 0.12309572 | 0.30102999 | 6  | 0 | 0.30102999 | 0          |
| chr8 | 53273925 | 53318890 | 44966  | 2  | 6 | 1 | 0.20064824 | 0.30102999 | 6  | 0 | 0.20064824 | 0          |
| chr8 | 53318890 | 53363992 | 45103  | 1  | 5 | 1 | 0.12309572 | 0.30102999 | 6  | 0 | 0.30102999 | 0          |
| chr8 | 53363992 | 53364051 | 60     | 1  | 5 | 1 | 0.07511598 | 0.30102999 | 7  | 0 | 0.43181735 | 0          |
| chr8 | 53364051 | 53467396 | 103346 | 1  | 3 | 1 | 0.01598258 | 0.30102999 | 7  | 0 | 0.84395715 | 0          |
| chr8 | 53467396 | 53607735 | 140340 | 4  | 3 | 1 | 0.03070643 | 0.30102999 | 6  | 0 | 0.63695542 | 0          |
| chr8 | 53607735 | 53694659 | 86925  | 2  | 3 | 1 | 0.05670724 | 0.30102999 | 5  | 0 | 0.45545077 | 0          |
| chr8 | 53694659 | 53694718 | 60     | 1  | 3 | 1 | 0.01598258 | 0.30102999 | 7  | 0 | 0.84395715 | 0          |
| chr8 | 53694718 | 54068813 | 374096 | 2  | 3 | 0 | 0.05670724 | 0          | 5  | 0 | 0.45545077 | 0          |
| chr8 | 54068813 | 54151519 | 82707  | 3  | 3 | 0 | 0.10122019 | 0          | 4  | 0 | 0.30102999 | 0          |
| chr8 | 54151519 | 54237949 | 86431  | 1  | 2 | 0 | 0.0429175  | 0          | 4  | 0 | 0.47744371 | 0          |
| chr8 | 54237949 | 54238008 | 60     | 1  | 2 | 0 | 0.01053319 | 0          | 6  | 0 | 0.91219088 | 0          |
| chr8 | 54238008 | 54426040 | 188033 | 1  | 2 | 0 | 0.0429175  | 0          | 4  | 0 | 0.47744371 | 0          |
| chr8 | 54426040 | 54628150 | 202111 | 3  | 3 | 0 | 0.10122019 | 0          | 4  | 0 | 0.30102999 | 0          |
| chr8 | 54628150 | 55273058 | 644909 | 11 | 3 | 1 | 0.10122019 | 0.30102999 | 4  | 0 | 0.30102999 | 0          |
| chr8 | 55273058 | 55372900 | 99843  | 4  | 1 | 1 | 0.05670724 | 0.30102999 | 5  | 0 | 0.45545077 | 0          |
| chr8 | 55372900 | 55445546 | 72647  | 1  | 3 | 1 | 0.10122019 | 0.30102999 | 4  | 0 | 0.30102999 | 0          |
| chr8 | 55445546 | 55538020 | 92475  | 3  | 3 | 1 | 0.05670724 | 0.30102999 | 5  | 0 | 0.45545077 | 0          |
| chr8 | 55538020 | 55538079 | 60     | 1  | 3 | 1 | 0.03070643 | 0.30102999 | 6  | 0 | 0.63695542 | 0          |
| chr8 | 55538079 | 55613652 | 75515  | 1  | 3 | 1 | 0.05670724 | 0.30102999 | 5  | 0 | 0.45545077 | 0          |
| chr8 | 55613652 | 55613692 | 60     | 1  | 3 | 1 | 0.03070643 | 0.30102999 | 6  | 0 | 0.63695542 | 0          |
| chr8 | 55613692 | 55994867 | 381216 | 3  | 3 | 1 | 0.10122019 | 0.30102999 | 4  | 0 | 0.30102999 | 0          |
| chr8 | 55994867 | 56081406 | 86630  | 3  | 3 | 1 | 0.05670724 | 0.30102999 | 5  | 0 | 0.45545077 | 0          |
| chr8 | 56081406 | 56147083 | 65588  | 2  | 4 | 1 | 0.11390336 | 0.30102999 | 5  | 0 | 0.30102999 | 0          |
| chr8 | 56147083 | 56192971 | 45889  | 4  | 4 | 1 | 0.02074938 | 0.30102999 | 8  | 0 | 0.79906872 | 0          |
| chr8 | 56192971 | 56383853 | 190883 | 4  | 4 | 1 | 0.03812622 | 0.30102999 | 7  | 0 | 0.60763643 | 0          |
| chr8 | 56383853 | 56383912 | 60     | 1  | 4 | 1 | 0.02074938 | 0.30102999 | 8  | 0 | 0.79906872 | 0          |
| chr8 | 56383912 | 56525071 | 141160 | 2  | 4 | 1 | 0.03812622 | 0.30102999 | 7  | 0 | 0.60763643 | 0          |
| chr8 | 56525071 | 56525130 | 60     | 1  | 4 | 1 | 0.02074938 | 0.30102999 | 8  | 0 | 0.79906872 | 0          |
| chr8 | 56525130 | 56607820 | 82691  | 1  | 4 | 1 | 0.03812622 | 0.30102999 | 7  | 0 | 0.60763643 | 0          |
| chr8 | 56607820 | 56652014 | 44195  | 1  | 4 | 1 | 0.06713722 | 0.30102999 | 6  | 0 | 0.44141547 | 0          |
| chr8 | 56652014 | 56776724 | 124711 | 5  | 4 | 1 | 0.02074938 | 0.30102999 | 8  | 0 | 0.79906872 | 0          |
| chr8 | 56776724 | 56886235 | 109512 | 2  | 4 | 1 | 0.03812622 | 0.30102999 | 7  | 0 | 0.60763643 | 0          |
| chr8 | 56886235 | 56922544 | 36310  | 1  | 4 | 1 | 0.11390336 | 0.30102999 | 5  | 0 | 0.30102999 | 0          |
| chr8 | 56922544 | 56986184 | 63641  | 2  | 4 | 1 | 0.06713722 | 0.30102999 | 6  | 0 | 0.44141547 | 0          |
| chr8 | 56986184 | 57025855 | 39672  | 1  | 4 | 0 | 0.11390336 | 0          | 5  | 0 | 0.30102999 | 0          |
| chr8 | 57025855 | 57075931 | 50077  | 2  | 4 | 0 | 0.06713722 | 0          | 6  | 0 | 0.44141547 | 0          |
| chr8 | 57075931 | 57229343 | 153413 | 5  | 4 | 0 | 0.03812622 | 0          | 7  | 0 | 0.60763643 | 0          |
| chr8 | 57229343 | 57229402 | 60     | 1  | 4 | 0 | 0.02074938 | 0          | 8  | 0 | 0.79906872 | 0          |
| chr8 | 57229402 | 57294135 | 64734  | 1  | 4 | 0 | 0.03812622 | 0          | 7  | 0 | 0.60763643 | 0          |
| chr8 | 57294135 | 57414265 | 120131 | 3  | 4 | 0 | 0.06713722 | 0          | 6  | 0 | 0.44141547 | 0          |
| chr8 | 57414265 | 57481595 | 67331  | 2  | 4 | 1 | 0.06713722 | 0.30102999 | 6  | 0 | 0.44141547 | 0          |
| chr8 | 57481595 | 57903463 | 421869 | 5  | 4 | 0 | 0.06713722 | 0          | 6  | 0 | 0.44141547 | 0          |
| chr8 | 57903463 | 57903522 | 60     | 1  | 5 | 1 | 0.12309572 | 0.30102999 | 6  | 0 | 0.30102999 | 0          |
| chr8 | 57903522 | 58006167 | 102646 | 1  | 4 | 1 | 0.06713722 | 0.30102999 | 6  | 0 | 0.44141547 | 0          |
| chr8 | 58006167 | 58006226 | 60     | 1  | 4 | 1 | 0.06713722 | 0.1218695  | 6  | 1 | 0.44141547 | 0.1218695  |
| chr8 | 58006226 | 58049907 | 43682  | 1  | 4 | 0 | 0.06713722 | 0          | 6  | 1 | 0.44141547 | 0.30102999 |
| chr8 | 58049907 | 58195802 | 145896 | 2  | 4 | 0 | 0.06713722 | 0          | 6  | 0 | 0.44141547 | 0          |
| chr8 | 58195802 | 58244889 | 49088  | 3  | 4 | 1 | 0.06713722 | 0.30102999 | 6  | 0 | 0.44141547 | 0          |
| chr8 | 58244889 | 58432828 | 187940 | 1  | 4 | 1 | 0.11390336 | 0.30102999 | 5  | 0 | 0.30102999 | 0          |
| chr8 | 58432828 | 58832685 | 399858 | 3  | 4 | 1 | 0.18734596 | 0.30102999 | 4  | 0 | 0.18734596 | 0          |
| chr8 | 58832685 | 58995874 | 163190 | 4  | 4 | 1 | 0.11390336 | 0.30102999 | 5  |   |            |            |



|      |          |          |        |    |    |   |            |            |    |   |            |            |
|------|----------|----------|--------|----|----|---|------------|------------|----|---|------------|------------|
| chr8 | 61915248 | 62121726 | 206479 | 2  | 3  | 1 | 0.10122019 | 0.30102999 | 4  | 0 | 0.30102999 | 0          |
| chr8 | 62121726 | 62121785 | 60     | 1  | 4  | 1 | 0.18734596 | 0.30102999 | 4  | 0 | 0.18734596 | 0          |
| chr8 | 62121785 | 62256117 | 134333 | 2  | 3  | 0 | 0.10122019 | 0          | 4  | 0 | 0.30102999 | 0          |
| chr8 | 62256117 | 62370995 | 114879 | 4  | 4  | 1 | 0.18734596 | 0.30102999 | 4  | 0 | 0.18734596 | 0          |
| chr8 | 62370995 | 62460604 | 89610  | 3  | 5  | 1 | 0.19510895 | 0.30102999 | 5  | 0 | 0.19510895 | 0          |
| chr8 | 62460604 | 62460663 | 60     | 1  | 5  | 1 | 0.12309572 | 0.30102999 | 6  | 0 | 0.30102999 | 0          |
| chr8 | 62460663 | 62505567 | 44905  | 1  | 5  | 0 | 0.12309572 | 0          | 6  | 0 | 0.30102999 | 0          |
| chr8 | 62505567 | 62537287 | 31721  | 1  | 5  | 0 | 0.19510895 | 0          | 5  | 0 | 0.19510895 | 0          |
| chr8 | 62537287 | 62580779 | 43493  | 2  | 5  | 1 | 0.19510895 | 0.30102999 | 5  | 0 | 0.19510895 | 0          |
| chr8 | 62580779 | 62580832 | 54     | 1  | 5  | 1 | 0.12309572 | 0.30102999 | 6  | 0 | 0.30102999 | 0          |
| chr8 | 62580832 | 62621940 | 41109  | 1  | 4  | 1 | 0.06713722 | 0.30102999 | 6  | 0 | 0.44141547 | 0          |
| chr8 | 62621940 | 63072717 | 450778 | 3  | 4  | 1 | 0.30102999 | 0.30102999 | 3  | 0 | 0.10120219 | 0          |
| chr8 | 63072717 | 63199019 | 126303 | 2  | 4  | 1 | 0.60763643 | 0.30102999 | 4  | 0 | 0.03812622 | 0          |
| chr8 | 63199019 | 63199078 | 60     | 1  | 7  | 2 | 0.30102999 | 0.61140001 | 6  | 0 | 0.129913   | 0          |
| chr8 | 63199078 | 63283467 | 84390  | 2  | 6  | 2 | 0.44141547 | 0.61140001 | 4  | 0 | 0.06713722 | 0          |
| chr8 | 63283467 | 63338725 | 55259  | 2  | 7  | 2 | 0.43181735 | 0.61140001 | 5  | 0 | 0.07511598 | 0          |
| chr8 | 63338725 | 63386986 | 48262  | 2  | 7  | 2 | 0.30102999 | 0.61140001 | 6  | 0 | 0.129913   | 0          |
| chr8 | 63386986 | 63387045 | 60     | 1  | 7  | 2 | 0.20469099 | 0.61140001 | 7  | 0 | 0.20469099 | 0          |
| chr8 | 63387045 | 63427135 | 40091  | 1  | 7  | 1 | 0.30102999 | 0.30102999 | 6  | 0 | 0.129913   | 0          |
| chr8 | 63427135 | 63462169 | 35035  | 1  | 6  | 1 | 0.20064824 | 0.30102999 | 6  | 0 | 0.20064824 | 0          |
| chr8 | 63462169 | 63462228 | 60     | 1  | 6  | 1 | 0.129913   | 0.30102999 | 7  | 0 | 0.30102999 | 0          |
| chr8 | 63462228 | 63517033 | 54806  | 1  | 5  | 1 | 0.12309572 | 0.30102999 | 6  | 0 | 0.30102999 | 0          |
| chr8 | 63517033 | 63569712 | 52880  | 2  | 5  | 2 | 0.12309572 | 0.61140001 | 6  | 0 | 0.30102999 | 0          |
| chr8 | 63569712 | 63569771 | 60     | 1  | 5  | 2 | 0.12309572 | 0.30102999 | 6  | 1 | 0.30102999 | 0.05404976 |
| chr8 | 63569771 | 63779676 | 209906 | 4  | 5  | 2 | 0.30102999 | 0.30102999 | 4  | 1 | 0.11390336 | 0.05404976 |
| chr8 | 63779676 | 63779735 | 60     | 1  | 5  | 2 | 0.12309572 | 0.30102999 | 6  | 1 | 0.30102999 | 0.05404976 |
| chr8 | 63779735 | 63803369 | 123635 | 5  | 2  | 2 | 0.30102999 | 0.30102999 | 4  | 1 | 0.11390336 | 0.05404976 |
| chr8 | 63803369 | 64443494 | 540126 | 11 | 5  | 2 | 0.45545077 | 0.30102999 | 3  | 1 | 0.05670724 | 0.05404976 |
| chr8 | 64443494 | 64443553 | 60     | 1  | 5  | 2 | 0.19510895 | 0.30102999 | 5  | 1 | 0.19510895 | 0.05404976 |
| chr8 | 64443553 | 64507981 | 64429  | 1  | 5  | 2 | 0.30102999 | 0.30102999 | 4  | 1 | 0.11390336 | 0.05404976 |
| chr8 | 64507981 | 64709711 | 201731 | 2  | 5  | 2 | 0.45545077 | 0.30102999 | 3  | 1 | 0.05670724 | 0.05404976 |
| chr8 | 64709711 | 64709770 | 60     | 1  | 5  | 2 | 0.07511598 | 0.30102999 | 7  | 1 | 0.43181735 | 0.05404976 |
| chr8 | 64709770 | 64921244 | 211475 | 1  | 5  | 2 | 0.30102999 | 0.30102999 | 4  | 1 | 0.11390336 | 0.05404976 |
| chr8 | 64921244 | 65113979 | 192736 | 1  | 5  | 2 | 0.45545077 | 0.30102999 | 3  | 1 | 0.05670724 | 0.05404976 |
| chr8 | 65113979 | 65114038 | 60     | 1  | 5  | 3 | 0.45545077 | 0.51676182 | 3  | 1 | 0.05670724 | 0.02438896 |
| chr8 | 65114038 | 65275659 | 161622 | 2  | 4  | 2 | 0.47744371 | 0.30102999 | 2  | 1 | 0.0429175  | 0.05404976 |
| chr8 | 65275659 | 65275718 | 60     | 1  | 5  | 3 | 0.45545077 | 0.51676182 | 3  | 1 | 0.05670724 | 0.02438896 |
| chr8 | 65275718 | 65302085 | 26368  | 1  | 5  | 2 | 0.68214471 | 0.30102999 | 2  | 1 | 0.02162467 | 0.05404976 |
| chr8 | 65302085 | 65302144 | 60     | 1  | 5  | 2 | 0.45545077 | 0.30102999 | 3  | 1 | 0.05670724 | 0.05404976 |
| chr8 | 65302144 | 65427599 | 125456 | 1  | 5  | 1 | 0.45545077 | 0.1218695  | 3  | 1 | 0.05670724 | 0.1218695  |
| chr8 | 65427599 | 65495515 | 67917  | 2  | 5  | 1 | 0.30102999 | 0.1218695  | 4  | 1 | 0.11390336 | 0.1218695  |
| chr8 | 65495515 | 65555119 | 59605  | 2  | 4  | 1 | 0.30102999 | 0.1218695  | 3  | 1 | 0.10120219 | 0.1218695  |
| chr8 | 65555119 | 6557261  | 102143 | 3  | 5  | 1 | 0.30102999 | 0.1218695  | 4  | 1 | 0.11390336 | 0.1218695  |
| chr8 | 6557261  | 66231528 | 574268 | 5  | 5  | 1 | 0.19510895 | 0.1218695  | 5  | 1 | 0.1218695  | 0.1218695  |
| chr8 | 66231528 | 66231587 | 60     | 1  | 5  | 1 | 0.07511598 | 0.1218695  | 7  | 1 | 0.43181735 | 0.1218695  |
| chr8 | 66231587 | 66409867 | 178281 | 2  | 5  | 1 | 0.12309572 | 0.1218695  | 6  | 1 | 0.30102999 | 0.1218695  |
| chr8 | 66409867 | 66515100 | 105234 | 3  | 5  | 1 | 0.04407651 | 0.1218695  | 8  | 1 | 0.58747015 | 0.1218695  |
| chr8 | 66515100 | 66545979 | 30880  | 4  | 5  | 1 | 0.02473314 | 0.1218695  | 9  | 1 | 0.76806864 | 0.1218695  |
| chr8 | 66545979 | 66582143 | 36165  | 1  | 5  | 1 | 0.04407651 | 0.1218695  | 8  | 1 | 0.58747015 | 0.1218695  |
| chr8 | 66582143 | 66622671 | 40529  | 1  | 5  | 1 | 0.07511598 | 0.1218695  | 7  | 1 | 0.43181735 | 0.1218695  |
| chr8 | 66622671 | 66647080 | 24410  | 3  | 5  | 1 | 0.04407651 | 0.1218695  | 8  | 1 | 0.58747015 | 0.1218695  |
| chr8 | 66647080 | 66647139 | 60     | 1  | 5  | 1 | 0.02473314 | 0.1218695  | 9  | 1 | 0.76806864 | 0.1218695  |
| chr8 | 66647139 | 66913877 | 266739 | 3  | 5  | 1 | 0.04407651 | 0.1218695  | 8  | 1 | 0.58747015 | 0.1218695  |
| chr8 | 66913877 | 67012006 | 98130  | 3  | 5  | 1 | 0.01320236 | 0.1218695  | 10 | 1 | 0.97390707 | 0.1218695  |
| chr8 | 67012006 | 67128015 | 116010 | 6  | 6  | 1 | 0.02793176 | 0.1218695  | 10 | 1 | 0.74627054 | 0.1218695  |
| chr8 | 67128015 | 67128074 | 60     | 1  | 7  | 1 | 0.01667721 | 0.1218695  | 12 | 1 | 0.92532268 | 0.1218695  |
| chr8 | 67128074 | 67296789 | 168716 | 1  | 6  | 1 | 0.00778066 | 0.1218695  | 12 | 1 | 1.17038931 | 0.1218695  |
| chr8 | 67296789 | 67492176 | 195388 | 7  | 6  | 1 | 0.00373523 | 0.1218695  | 13 | 1 | 1.42397267 | 0.1218695  |
| chr8 | 67492176 | 67492235 | 60     | 1  | 8  | 1 | 0.01767679 | 0.1218695  | 13 | 1 | 0.91308053 | 0.1218695  |
| chr8 | 67492235 | 67543387 | 51153  | 2  | 7  | 1 | 0.01667721 | 0.1218695  | 12 | 1 | 0.92532268 | 0.1218695  |
| chr8 | 67543387 | 67644481 | 101095 | 4  | 5  | 1 | 0.00666883 | 0.1218695  | 11 | 1 | 1.20557689 | 0.1218695  |
| chr8 | 67644481 | 67644540 | 60     | 1  | 7  | 1 | 0.03037338 | 0.1218695  | 11 | 1 | 0.73110763 | 0.1218695  |
| chr8 | 67644540 | 67684227 | 39688  | 1  | 5  | 1 | 0.01518174 | 0.1218695  | 11 | 1 | 0.9449689  | 0.1218695  |
| chr8 | 67684227 | 67971446 | 287220 | 6  | 5  | 1 | 0.00666883 | 0.1218695  | 11 | 1 | 1.20557689 | 0.1218695  |
| chr8 | 67971446 | 68074066 | 102621 | 4  | 7  | 2 | 0.03037338 | 0.30102999 | 11 | 1 | 0.73110763 | 0.05404976 |
| chr8 | 68074066 | 68111201 | 37136  | 6  | 6  | 1 | 0.01518174 | 0.1218695  | 11 | 1 | 0.9449689  | 0.1218695  |
| chr8 | 68111201 | 68289291 | 188091 | 4  | 5  | 1 | 0.00666883 | 0.1218695  | 11 | 1 | 1.20557689 | 0.1218695  |
| chr8 | 68289291 | 68334426 | 35136  | 2  | 7  | 2 | 0.03037338 | 0.30102999 | 11 | 1 | 0.73110763 | 0.05404976 |
| chr8 | 68334426 | 68454209 | 119784 | 2  | 6  | 2 | 0.01518174 | 0.30102999 | 11 | 1 | 0.9449689  | 0.05404976 |
| chr8 | 68454209 | 68536490 | 82282  | 3  | 7  | 2 | 0.03037338 | 0.30102999 | 11 | 1 | 0.73110763 | 0.05404976 |
| chr8 | 68536490 | 68595543 | 59054  | 1  | 7  | 2 | 0.05232577 | 0.1218695  | 10 | 1 | 0.56314362 | 0.1218695  |
| chr8 | 68595543 | 68675428 | 79886  | 3  | 9  | 1 | 0.14135546 | 0.1218695  | 10 | 1 | 0.30102999 | 0.1218695  |
| chr8 | 68675428 | 68675487 | 60     | 1  | 10 | 1 | 0.21118145 | 0.1218695  | 10 | 1 | 0.21118145 | 0.1218695  |
| chr8 | 68675487 | 68900021 | 224535 | 2  | 8  | 1 | 0.13872638 | 0.1218695  | 9  | 1 | 0.30102999 | 0.1218695  |
| chr8 | 68900021 | 68965391 | 65371  | 3  | 9  | 1 | 0.09154957 | 0.1218695  | 11 | 1 | 0.4144892  | 0.1218695  |
| chr8 | 68965391 | 69050748 | 85358  | 3  | 7  | 1 | 0.08584816 | 0.1218695  | 9  | 1 | 0.42015402 | 0.1218695  |
| chr8 | 69050748 | 69143736 | 92989  | 2  | 7  | 1 | 0.1349366  | 0.1218695  | 8  | 1 | 0.30102999 | 0.1218695  |
| chr8 | 69143736 | 69392095 | 248360 | 6  | 7  | 1 | 0.08584816 | 0.1218695  | 9  | 1 | 0.42015402 | 0.1218695  |
| chr8 | 69392095 | 69510342 | 118248 | 2  | 5  | 1 | 0.02473314 | 0.1218695  | 9  | 1 | 0.76806864 | 0.1218695  |
| chr8 | 69510342 | 69552714 | 42373  | 2  | 6  | 1 | 0.04875589 | 0.1218695  | 9  | 1 | 0.5732208  | 0.1218695  |
| chr8 | 69552714 | 69552773 | 60     | 1  | 8  | 1 | 0.0892391  | 0.1218695  | 10 | 1 | 0.4167287  | 0.1218695  |
| chr8 | 69552773 | 69610616 | 57844  | 1  | 7  | 1 | 0.08584816 | 0.1218695  | 9  | 1 | 0.42015402 | 0.1218695  |
| chr8 | 69610616 | 69680919 | 70304  | 2  | 5  | 1 | 0.02473314 | 0.1218695  | 9  | 1 | 0.76806864 | 0.1218695  |
| chr8 | 69680919 | 69730931 | 50013  | 2  | 6  | 1 | 0.04875589 | 0.1218695  | 9  | 1 | 0.5732208  | 0.1218695  |
| chr8 | 69730931 | 69836784 | 105854 | 1  | 5  | 1 | 0.02473314 | 0.1218695  | 9  | 1 | 0.76806864 | 0.1218695  |
| chr8 | 69836784 | 69867283 | 30500  | 2  | 5  | 1 | 0.01320236 | 0.1218695  | 10 | 1 | 0.97390707 | 0.1218695  |
| chr8 | 69867283 | 70029644 | 162362 | 2  | 5  | 1 | 0.04407651 | 0.1218695  | 8  | 1 | 0.58747015 | 0.1218695  |
| chr8 | 70029644 | 70106192 | 76549  | 1  | 5  | 1 | 0.12309572 | 0.30102999 | 6  | 0 | 0.30102999 | 0          |
| chr8 | 70106192 | 70279598 | 173407 | 1  | 5  | 0 | 0.19510895 | 0          | 5  | 0 | 0.19510895 | 0          |
| chr8 | 70279598 | 70279656 | 59     | 1  | 5  | 0 | 0.12309572 | 0          | 6  | 0 | 0.30102999 | 0          |
| chr8 | 70279656 | 70441544 | 161889 | 2  | 5  | 0 | 0.19510895 | 0          | 5  | 0 | 0.19510895 | 0          |
| chr8 | 70441544 | 70498689 | 57146  | 2  | 5  | 0 | 0.12309572 | 0          | 6  | 0 | 0.30102999 | 0          |
| chr8 | 70498689 | 70498748 | 60     | 1  | 5  | 0 | 0.12309572 | 0</        |    |   |            |            |

|      |          |          |        |   |    |   |            |            |    |   |            |            |
|------|----------|----------|--------|---|----|---|------------|------------|----|---|------------|------------|
| chr8 | 73850463 | 73925241 | 74779  | 1 | 5  | 0 | 0.01320236 | 0          | 10 | 0 | 0.97390707 | 0          |
| chr8 | 73925241 | 73982182 | 56942  | 3 | 7  | 0 | 0.05232577 | 0          | 10 | 0 | 0.56314362 | 0          |
| chr8 | 73982182 | 74203225 | 221044 | 6 | 7  | 0 | 0.05232577 | 0          | 10 | 1 | 0.56314362 | 0.30102999 |
| chr8 | 74203225 | 74203282 | 58     | 1 | 7  | 0 | 0.01667721 | 0          | 12 | 1 | 0.92532268 | 0.30102999 |
| chr8 | 74203282 | 74214226 | 10945  | 1 | 6  | 0 | 0.01518174 | 0          | 11 | 1 | 0.9449689  | 0.30102999 |
| chr8 | 74214226 | 74226543 | 12318  | 2 | 7  | 0 | 0.03037338 | 0          | 11 | 1 | 0.73110763 | 0.30102999 |
| chr8 | 74226543 | 74325115 | 98573  | 1 | 6  | 0 | 0.01518174 | 0          | 11 | 1 | 0.9449689  | 0.30102999 |
| chr8 | 74325115 | 74565684 | 240570 | 6 | 6  | 0 | 0.00778066 | 0          | 12 | 1 | 1.17038931 | 0.30102999 |
| chr8 | 74565684 | 74603322 | 37639  | 2 | 6  | 0 | 0.00373523 | 0          | 13 | 1 | 1.42397267 | 0.30102999 |
| chr8 | 74603322 | 74654966 | 51645  | 1 | 6  | 0 | 0.00778066 | 0          | 12 | 1 | 1.17038931 | 0.30102999 |
| chr8 | 74654966 | 74731758 | 76793  | 2 | 6  | 0 | 0.01518174 | 0          | 11 | 0 | 0.9449689  | 0          |
| chr8 | 74731758 | 74731817 | 60     | 1 | 6  | 0 | 0.00778066 | 0          | 12 | 0 | 1.17038931 | 0          |
| chr8 | 74731817 | 74789791 | 57975  | 1 | 6  | 0 | 0.02793176 | 0          | 10 | 0 | 0.74627054 | 0          |
| chr8 | 74789791 | 74860448 | 70658  | 2 | 6  | 0 | 0.01518174 | 0          | 11 | 0 | 0.9449689  | 0          |
| chr8 | 74860448 | 74893709 | 33262  | 3 | 6  | 0 | 0.00778066 | 0          | 12 | 0 | 1.17038931 | 0          |
| chr8 | 74893709 | 75147258 | 253550 | 4 | 6  | 0 | 0.01518174 | 0          | 11 | 0 | 0.9449689  | 0          |
| chr8 | 75147258 | 75210473 | 63216  | 4 | 6  | 0 | 0.00778066 | 0          | 12 | 0 | 1.17038931 | 0          |
| chr8 | 75210473 | 75397018 | 186546 | 3 | 6  | 0 | 0.08122616 | 0          | 8  | 0 | 0.4250187  | 0          |
| chr8 | 75397018 | 75586021 | 189004 | 2 | 6  | 0 | 0.04875589 | 0          | 9  | 0 | 0.5732208  | 0          |
| chr8 | 75586021 | 75586080 | 60     | 6 | 0  | 0 | 0.02793176 | 0          | 10 | 0 | 0.74627054 | 0          |
| chr8 | 75586080 | 75878199 | 292120 | 4 | 6  | 0 | 0.08122616 | 0          | 8  | 0 | 0.4250187  | 0          |
| chr8 | 75878199 | 75878258 | 60     | 6 | 0  | 0 | 0.04875589 | 0          | 9  | 0 | 0.5732208  | 0          |
| chr8 | 75878258 | 75889752 | 111495 | 2 | 6  | 0 | 0.08122616 | 0          | 8  | 0 | 0.4250187  | 0          |
| chr8 | 75889752 | 75889811 | 60     | 1 | 6  | 0 | 0.04875589 | 0          | 9  | 0 | 0.5732208  | 0          |
| chr8 | 75889811 | 76069530 | 79720  | 1 | 6  | 0 | 0.08122616 | 0          | 8  | 0 | 0.4250187  | 0          |
| chr8 | 76069530 | 76149281 | 79752  | 1 | 6  | 0 | 0.129913   | 0          | 7  | 0 | 0.30102999 | 0          |
| chr8 | 76149281 | 76149340 | 60     | 1 | 6  | 0 | 0.08122616 | 0          | 8  | 0 | 0.4250187  | 0          |
| chr8 | 76149340 | 76564258 | 414919 | 7 | 6  | 0 | 0.129913   | 0          | 7  | 0 | 0.30102999 | 0          |
| chr8 | 76564258 | 76564317 | 60     | 1 | 7  | 0 | 0.20469099 | 0          | 7  | 0 | 0.20469099 | 0          |
| chr8 | 76564317 | 76687035 | 122719 | 1 | 7  | 0 | 0.30102999 | 0          | 6  | 0 | 0.129913   | 0          |
| chr8 | 76687035 | 76794376 | 107342 | 2 | 7  | 0 | 0.20469099 | 0          | 7  | 1 | 0.20469099 | 0.30102999 |
| chr8 | 76794376 | 76941461 | 147086 | 2 | 8  | 0 | 0.30102999 | 0          | 7  | 1 | 0.13499366 | 0.30102999 |
| chr8 | 76941461 | 76941520 | 60     | 1 | 8  | 0 | 0.20764654 | 0          | 8  | 1 | 0.20764654 | 0.30102999 |
| chr8 | 76941520 | 77119820 | 178301 | 2 | 8  | 0 | 0.30102999 | 0          | 7  | 1 | 0.13499366 | 0.30102999 |
| chr8 | 77119820 | 77119879 | 60     | 1 | 8  | 0 | 0.13872638 | 0          | 9  | 1 | 0.30102999 | 0.30102999 |
| chr8 | 77119879 | 77376307 | 256429 | 2 | 8  | 0 | 0.30102999 | 0          | 7  | 1 | 0.13499366 | 0.30102999 |
| chr8 | 77376307 | 77376366 | 60     | 1 | 8  | 0 | 0.13872638 | 0          | 9  | 1 | 0.30102999 | 0.30102999 |
| chr8 | 77376366 | 77648477 | 272112 | 4 | 8  | 0 | 0.30102999 | 0          | 7  | 1 | 0.13499366 | 0.30102999 |
| chr8 | 77648477 | 78075125 | 426649 | 7 | 8  | 0 | 0.4250187  | 0          | 6  | 1 | 0.08122616 | 0.30102999 |
| chr8 | 78075125 | 78357218 | 282094 | 1 | 6  | 0 | 0.20064824 | 0          | 6  | 1 | 0.20064824 | 0.30102999 |
| chr8 | 78357218 | 78372122 | 14905  | 2 | 7  | 0 | 0.13499366 | 0          | 8  | 1 | 0.30102999 | 0.30102999 |
| chr8 | 78372122 | 78639744 | 267623 | 1 | 6  | 0 | 0.20064824 | 0          | 6  | 0 | 0.20064824 | 0          |
| chr8 | 78639744 | 78961227 | 321484 | 1 | 5  | 0 | 0.19510895 | 0          | 5  | 0 | 0.19510895 | 0          |
| chr8 | 78961227 | 78961286 | 60     | 1 | 5  | 0 | 0.12309572 | 0          | 6  | 0 | 0.30102999 | 0          |
| chr8 | 78961286 | 79434843 | 473558 | 4 | 5  | 0 | 0.19510895 | 0          | 5  | 0 | 0.19510895 | 0          |
| chr8 | 79434843 | 79514785 | 79943  | 2 | 5  | 0 | 0.30102999 | 0          | 4  | 0 | 0.11390336 | 0          |
| chr8 | 79514785 | 79645911 | 131127 | 2 | 4  | 0 | 0.18734596 | 0          | 4  | 0 | 0.18734596 | 0          |
| chr8 | 79645911 | 79763966 | 118056 | 3 | 4  | 0 | 0.03812622 | 0          | 7  | 0 | 0.60763643 | 0          |
| chr8 | 79763966 | 79967045 | 203080 | 2 | 7  | 0 | 0.08584816 | 0          | 9  | 0 | 0.42015402 | 0          |
| chr8 | 79967045 | 80082254 | 115210 | 2 | 8  | 0 | 0.08923391 | 0          | 10 | 0 | 0.4167287  | 0          |
| chr8 | 80082254 | 80440116 | 357863 | 3 | 8  | 0 | 0.05490675 | 0          | 11 | 0 | 0.55623409 | 0          |
| chr8 | 80440116 | 80559960 | 119845 | 2 | 9  | 0 | 0.0565833  | 0          | 12 | 0 | 0.55190077 | 0          |
| chr8 | 80559960 | 80560019 | 60     | 1 | 10 | 0 | 0.0574087  | 0          | 13 | 0 | 0.5498098  | 0          |
| chr8 | 80560019 | 80892766 | 332748 | 5 | 10 | 0 | 0.14303407 | 0          | 11 | 0 | 0.30102999 | 0          |
| chr8 | 80892766 | 80892825 | 60     | 1 | 10 | 0 | 0.0574087  | 0          | 13 | 0 | 0.5498098  | 0          |
| chr8 | 80892825 | 80948496 | 55672  | 1 | 9  | 0 | 0.0331093  | 0          | 13 | 0 | 0.71538971 | 0          |
| chr8 | 80948496 | 80992615 | 44120  | 1 | 9  | 0 | 0.09154957 | 0          | 11 | 0 | 0.41444892 | 0          |
| chr8 | 80992615 | 81043036 | 50422  | 3 | 10 | 0 | 0.0574087  | 0          | 13 | 0 | 0.5498098  | 0          |
| chr8 | 81043036 | 81070358 | 27323  | 2 | 10 | 1 | 0.03344703 | 0.30102999 | 14 | 0 | 0.71533304 | 0          |
| chr8 | 81070358 | 81198379 | 128022 | 2 | 10 | 1 | 0.09290028 | 0.30102999 | 12 | 0 | 0.41314172 | 0          |
| chr8 | 81198379 | 81198438 | 60     | 1 | 10 | 1 | 0.0574087  | 0.30102999 | 13 | 0 | 0.5498098  | 0          |
| chr8 | 81198438 | 81422563 | 224126 | 2 | 10 | 1 | 0.09290028 | 0.30102999 | 12 | 0 | 0.41314172 | 0          |
| chr8 | 81422563 | 81422622 | 60     | 1 | 10 | 1 | 0.03344703 | 0.1218695  | 14 | 1 | 0.71533304 | 0.1218695  |
| chr8 | 81422622 | 81432974 | 10353  | 2 | 10 | 1 | 0.0574087  | 0.1218695  | 13 | 1 | 0.5498098  | 0.1218695  |
| chr8 | 81432974 | 81669008 | 236035 | 4 | 10 | 0 | 0.0574087  | 0          | 13 | 1 | 0.5498098  | 0.30102999 |
| chr8 | 81669008 | 81726020 | 51013  | 1 | 10 | 0 | 0.09290028 | 0          | 12 | 1 | 0.41314172 | 0.30102999 |
| chr8 | 81726020 | 81855024 | 134405 | 3 | 10 | 0 | 0.09290028 | 0.1218695  | 12 | 1 | 0.41314172 | 0.1218695  |
| chr8 | 81855024 | 81888045 | 33022  | 1 | 10 | 1 | 0.14303407 | 0.1218695  | 11 | 1 | 0.30102999 | 0.1218695  |
| chr8 | 81888045 | 81925288 | 37244  | 1 | 10 | 0 | 0.14303407 | 0          | 11 | 1 | 0.30102999 | 0.30102999 |
| chr8 | 81925288 | 82019092 | 93805  | 4 | 10 | 0 | 0.09290028 | 0          | 12 | 1 | 0.41314172 | 0.30102999 |
| chr8 | 82019092 | 82019151 | 60     | 1 | 10 | 1 | 0.09290028 | 0.1218695  | 12 | 1 | 0.41314172 | 0.1218695  |
| chr8 | 82019151 | 82193925 | 174775 | 2 | 9  | 0 | 0.0565833  | 0          | 12 | 1 | 0.55190077 | 0.30102999 |
| chr8 | 82193925 | 82197238 | 3314   | 2 | 10 | 1 | 0.09290028 | 0.1218695  | 12 | 1 | 0.41314172 | 0.1218695  |
| chr8 | 82197238 | 82392629 | 195392 | 3 | 9  | 1 | 0.0565833  | 0.1218695  | 12 | 1 | 0.55190077 | 0.1218695  |
| chr8 | 82392629 | 82427223 | 34595  | 1 | 9  | 0 | 0.0565833  | 0          | 12 | 1 | 0.55190077 | 0.30102999 |
| chr8 | 82427223 | 82570356 | 143134 | 2 | 9  | 0 | 0.09154957 | 0          | 11 | 1 | 0.41444892 | 0.30102999 |
| chr8 | 82570356 | 82646435 | 76080  | 3 | 9  | 0 | 0.0565833  | 0          | 12 | 1 | 0.55190077 | 0.30102999 |
| chr8 | 82646435 | 82752514 | 106080 | 3 | 9  | 0 | 0.09154957 | 0          | 11 | 1 | 0.41444892 | 0.30102999 |
| chr8 | 82752514 | 82799697 | 47184  | 1 | 9  | 0 | 0.14135546 | 0          | 10 | 1 | 0.30102999 | 0.30102999 |
| chr8 | 82799697 | 83157905 | 358209 | 2 | 7  | 0 | 0.20469099 | 0          | 7  | 1 | 0.20469099 | 0.30102999 |
| chr8 | 83157905 | 83157964 | 60     | 1 | 9  | 0 | 0.30102999 | 0          | 8  | 1 | 0.13872638 | 0.30102999 |
| chr8 | 83157964 | 83365015 | 207052 | 2 | 6  | 0 | 0.129913   | 0          | 7  | 1 | 0.30102999 | 0.30102999 |
| chr8 | 83365015 | 83591368 | 226354 | 1 | 4  | 0 | 0.11390336 | 0          | 5  | 0 | 0.30102999 | 0          |
| chr8 | 83591368 | 83756025 | 164658 | 1 | 4  | 0 | 0.18734596 | 0          | 4  | 0 | 0.18734596 | 0          |
| chr8 | 83756025 | 83756084 | 60     | 1 | 4  | 0 | 0.11390336 | 0          | 5  | 0 | 0.30102999 | 0          |
| chr8 | 83756084 | 84280819 | 524736 | 3 | 4  | 0 | 0.18734596 | 0          | 4  | 0 | 0.18734596 | 0          |
| chr8 | 84280819 | 84772109 | 491291 | 4 | 5  | 0 | 0.19510895 | 0          | 5  | 1 | 0.19510895 | 0.30102999 |
| chr8 | 84772109 | 85022127 | 250019 | 3 | 7  | 0 | 0.13499366 | 0          | 8  | 1 | 0.30102999 | 0.30102999 |
| chr8 | 85022127 | 85197315 | 175189 | 4 | 8  | 0 | 0.13872638 | 0          | 9  | 1 | 0.30102999 | 0.30102999 |
| chr8 | 85197315 | 85229365 | 32051  | 2 | 8  | 0 | 0.05490675 | 0          | 11 | 1 | 0.55623409 | 0.30102999 |
| chr8 | 85229365 | 85409009 | 179645 | 3 | 8  | 0 | 0.13872638 | 0          | 9  | 1 | 0.30102999 | 0.30102999 |
| chr8 | 85409009 | 85521751 | 112743 | 3 | 9  | 0 | 0.20975986 | 0          | 9  | 1 | 0.20975986 | 0.30102999 |
| chr8 | 85521751 | 85521810 | 60     | 1 | 9  | 1 | 0.14135546 | 0.1218695  | 10 | 1 | 0.30102999 | 0.1218695  |
| chr8 | 85521810 | 85750950 | 229141 | 4 | 9  | 0 | 0.20975986 | 0          | 9  | 1 | 0.20975986 | 0.30102999 |
| chr8 | 85750950 | 85833804 | 82855  | 1 | 9  | 0 | 0.30102999 | 0          | 8  | 1 | 0.13872638 | 0.30102999 |
| chr8 | 85833804 | 85888656 | 54853  | 1 | 7  | 0 | 0.13499366 | 0          | 8  | 1 | 0.30102999 | 0.30102999 |
| chr8 | 85888656 | 86134206 | 245551 | 7 | 7  | 0 | 0.08584816 | 0          | 9  | 1 | 0.42015402 | 0.30102999 |
| chr8 | 86134206 | 86168328 | 34123  | 2 | 7  | 1 | 0.03037338 | 0.1218695  | 11 | 1 | 0.73110763 | 0.1218695  |
| chr8 | 8        |          |        |   |    |   |            |            |    |   |            |            |

|      |          |          |        |    |    |   |            |            |    |   |            |   |
|------|----------|----------|--------|----|----|---|------------|------------|----|---|------------|---|
| chr8 | 89408158 | 89832250 | 424093 | 4  | 8  | 0 | 0.20764654 | 0          | 8  | 0 | 0.20764654 | 0 |
| chr8 | 89832250 | 89959514 | 127265 | 2  | 8  | 0 | 0.05490675 | 0          | 11 | 0 | 0.55623409 | 0 |
| chr8 | 89959514 | 89959573 | 60     | 1  | 8  | 0 | 0.03209037 | 0          | 12 | 0 | 0.72109894 | 0 |
| chr8 | 89959573 | 90271287 | 311715 | 1  | 8  | 0 | 0.13872638 | 0          | 9  | 0 | 0.30102999 | 0 |
| chr8 | 90271287 | 90356558 | 85272  | 2  | 9  | 0 | 0.20975986 | 0          | 9  | 0 | 0.20975986 | 0 |
| chr8 | 90356558 | 90539895 | 183338 | 2  | 9  | 0 | 0.30102999 | 0          | 8  | 0 | 0.13872638 | 0 |
| chr8 | 90539895 | 90539954 | 60     | 1  | 9  | 0 | 0.20975986 | 0          | 9  | 0 | 0.20975986 | 0 |
| chr8 | 90539954 | 90734760 | 194807 | 2  | 9  | 0 | 0.30102999 | 0          | 8  | 0 | 0.13872638 | 0 |
| chr8 | 90734760 | 90802628 | 67869  | 5  | 9  | 0 | 0.20975986 | 0          | 9  | 0 | 0.20975986 | 0 |
| chr8 | 90802628 | 90921818 | 119191 | 1  | 9  | 0 | 0.30102999 | 0          | 8  | 0 | 0.13872638 | 0 |
| chr8 | 90921818 | 91049041 | 127224 | 6  | 9  | 0 | 0.20975986 | 0          | 9  | 0 | 0.20975986 | 0 |
| chr8 | 91049041 | 91125928 | 76888  | 4  | 9  | 0 | 0.09154957 | 0          | 11 | 0 | 0.41444892 | 0 |
| chr8 | 91125928 | 91125987 | 60     | 1  | 9  | 0 | 0.0565833  | 0          | 12 | 0 | 0.55190077 | 0 |
| chr8 | 91125987 | 91325764 | 199778 | 1  | 9  | 0 | 0.09154957 | 0          | 11 | 0 | 0.41444892 | 0 |
| chr8 | 91325764 | 91325823 | 60     | 1  | 9  | 0 | 0.0331093  | 0          | 13 | 0 | 0.71538971 | 0 |
| chr8 | 91325823 | 91611770 | 285948 | 3  | 9  | 0 | 0.09154957 | 0          | 11 | 0 | 0.41444892 | 0 |
| chr8 | 91611770 | 91667198 | 55429  | 2  | 9  | 0 | 0.0565833  | 0          | 12 | 0 | 0.55190077 | 0 |
| chr8 | 91667198 | 91712507 | 45310  | 2  | 10 | 0 | 0.09290028 | 0          | 12 | 0 | 0.41314172 | 0 |
| chr8 | 91712507 | 91775040 | 62534  | 1  | 10 | 0 | 0.14303407 | 0          | 11 | 0 | 0.30102999 | 0 |
| chr8 | 91775040 | 91893357 | 118318 | 3  | 9  | 0 | 0.09154957 | 0          | 11 | 0 | 0.41444892 | 0 |
| chr8 | 91893357 | 91996633 | 103277 | 2  | 9  | 0 | 0.30102999 | 0          | 8  | 0 | 0.13872638 | 0 |
| chr8 | 91996633 | 91996692 | 60     | 1  | 9  | 0 | 0.14135546 | 0          | 10 | 0 | 0.30102999 | 0 |
| chr8 | 91996692 | 92017958 | 21267  | 1  | 9  | 0 | 0.13872638 | 0          | 9  | 0 | 0.30102999 | 0 |
| chr8 | 92017958 | 92261799 | 243842 | 7  | 8  | 0 | 0.20764654 | 0          | 8  | 0 | 0.20764654 | 0 |
| chr8 | 92261799 | 92527471 | 265673 | 6  | 9  | 0 | 0.30102999 | 0          | 8  | 0 | 0.13872638 | 0 |
| chr8 | 92527471 | 92527530 | 60     | 1  | 9  | 0 | 0.20975986 | 0          | 9  | 0 | 0.20975986 | 0 |
| chr8 | 92527530 | 92650333 | 122804 | 2  | 8  | 0 | 0.20764654 | 0          | 8  | 0 | 0.20764654 | 0 |
| chr8 | 92650333 | 92650392 | 60     | 1  | 9  | 0 | 0.20975986 | 0          | 9  | 0 | 0.20975986 | 0 |
| chr8 | 92650392 | 92918168 | 267777 | 2  | 8  | 0 | 0.30102999 | 0          | 7  | 0 | 0.13499366 | 0 |
| chr8 | 92918168 | 92918227 | 60     | 1  | 10 | 0 | 0.4167287  | 0          | 8  | 0 | 0.08923391 | 0 |
| chr8 | 92918227 | 92971254 | 53028  | 1  | 9  | 0 | 0.30102999 | 0          | 8  | 0 | 0.13872638 | 0 |
| chr8 | 92971254 | 92999161 | 27908  | 2  | 9  | 0 | 0.14135546 | 0          | 10 | 0 | 0.30102999 | 0 |
| chr8 | 92999161 | 93029826 | 30666  | 2  | 10 | 0 | 0.21118145 | 0          | 10 | 0 | 0.21118145 | 0 |
| chr8 | 93029826 | 93061154 | 31329  | 1  | 10 | 0 | 0.30102999 | 0          | 9  | 0 | 0.14135546 | 0 |
| chr8 | 93061154 | 93088389 | 27236  | 1  | 10 | 0 | 0.4167287  | 0          | 8  | 0 | 0.08923391 | 0 |
| chr8 | 93088389 | 93194969 | 106581 | 2  | 8  | 0 | 0.30102999 | 0          | 7  | 0 | 0.13499366 | 0 |
| chr8 | 93194969 | 93335136 | 140168 | 2  | 8  | 0 | 0.20764654 | 0          | 8  | 0 | 0.20764654 | 0 |
| chr8 | 93335136 | 93335195 | 60     | 1  | 8  | 0 | 0.13872638 | 0          | 9  | 0 | 0.30102999 | 0 |
| chr8 | 93335195 | 93469030 | 133836 | 1  | 8  | 0 | 0.20764654 | 0          | 8  | 0 | 0.20764654 | 0 |
| chr8 | 93469030 | 93662591 | 193562 | 1  | 7  | 0 | 0.13499366 | 0          | 8  | 0 | 0.30102999 | 0 |
| chr8 | 93662591 | 93767760 | 105170 | 1  | 7  | 0 | 0.20469099 | 0          | 7  | 0 | 0.20469099 | 0 |
| chr8 | 93767760 | 93824090 | 56331  | 2  | 8  | 0 | 0.30102999 | 0          | 7  | 0 | 0.13499366 | 0 |
| chr8 | 93824090 | 93824149 | 60     | 1  | 8  | 0 | 0.05490675 | 0          | 11 | 0 | 0.55623409 | 0 |
| chr8 | 93824149 | 93945663 | 121515 | 2  | 8  | 0 | 0.20764654 | 0          | 8  | 0 | 0.20764654 | 0 |
| chr8 | 93945663 | 94081963 | 136301 | 3  | 8  | 0 | 0.08923391 | 0          | 10 | 0 | 0.4167287  | 0 |
| chr8 | 94081963 | 94320302 | 238340 | 3  | 7  | 0 | 0.08584816 | 0          | 9  | 0 | 0.42015402 | 0 |
| chr8 | 94320302 | 94320361 | 60     | 1  | 7  | 0 | 0.01667721 | 0          | 12 | 0 | 0.92532268 | 0 |
| chr8 | 94320361 | 94430294 | 109934 | 1  | 7  | 0 | 0.08584816 | 0          | 9  | 0 | 0.42015402 | 0 |
| chr8 | 94430294 | 94465088 | 34795  | 2  | 7  | 0 | 0.05232577 | 0          | 10 | 0 | 0.56314362 | 0 |
| chr8 | 94465088 | 94465147 | 60     | 1  | 8  | 0 | 0.03209037 | 0          | 12 | 0 | 0.72109894 | 0 |
| chr8 | 94465147 | 94550070 | 84924  | 1  | 8  | 0 | 0.05490675 | 0          | 11 | 0 | 0.55623409 | 0 |
| chr8 | 94550070 | 94622311 | 72242  | 2  | 8  | 0 | 0.03209037 | 0          | 12 | 0 | 0.72109894 | 0 |
| chr8 | 94622311 | 94737899 | 115589 | 3  | 8  | 0 | 0.00433294 | 0          | 15 | 0 | 1.3873209  | 0 |
| chr8 | 94737899 | 94784854 | 46956  | 4  | 9  | 0 | 0.00433294 | 0          | 16 | 0 | 1.3873209  | 0 |
| chr8 | 94784854 | 94992353 | 207500 | 3  | 8  | 0 | 0.00433294 | 0          | 15 | 0 | 1.3873209  | 0 |
| chr8 | 94992353 | 95106370 | 114018 | 2  | 10 | 0 | 0.00909834 | 0          | 16 | 0 | 1.13428373 | 0 |
| chr8 | 95106370 | 95220701 | 114332 | 4  | 10 | 0 | 0.00413023 | 0          | 17 | 0 | 1.39918918 | 0 |
| chr8 | 95220701 | 95582623 | 361923 | 10 | 11 | 0 | 0.00859896 | 0          | 17 | 0 | 1.14735594 | 0 |
| chr8 | 95582623 | 95718151 | 135529 | 2  | 11 | 0 | 0.01767679 | 0          | 16 | 0 | 0.91308053 | 0 |
| chr8 | 95718151 | 95718209 | 59     | 1  | 11 | 0 | 0.00859896 | 0          | 17 | 0 | 1.14735594 | 0 |
| chr8 | 95718209 | 95787879 | 69671  | 2  | 10 | 0 | 0.00909834 | 0          | 16 | 0 | 1.13428373 | 0 |
| chr8 | 95787879 | 95906483 | 118605 | 6  | 10 | 0 | 0.00413023 | 0          | 17 | 0 | 1.39918918 | 0 |
| chr8 | 95906483 | 95944304 | 37822  | 1  | 10 | 0 | 0.00909834 | 0          | 16 | 0 | 1.13428373 | 0 |
| chr8 | 95944304 | 96039968 | 95665  | 2  | 10 | 0 | 0.01817691 | 0          | 15 | 0 | 0.90719478 | 0 |
| chr8 | 96039968 | 96070073 | 30106  | 2  | 10 | 0 | 0.00909834 | 0          | 16 | 0 | 1.13428373 | 0 |
| chr8 | 96070073 | 96257651 | 187579 | 3  | 10 | 0 | 0.01817691 | 0          | 15 | 0 | 0.90719478 | 0 |
| chr8 | 96257651 | 96257710 | 60     | 1  | 11 | 0 | 0.0331093  | 0          | 15 | 0 | 0.71538971 | 0 |
| chr8 | 96257710 | 96269237 | 11528  | 2  | 11 | 0 | 0.0574087  | 0          | 14 | 0 | 0.5498098  | 0 |
| chr8 | 96269237 | 96432872 | 163636 | 3  | 11 | 0 | 0.0331093  | 0          | 15 | 0 | 0.71538971 | 0 |
| chr8 | 96432872 | 96432931 | 60     | 1  | 11 | 0 | 0.01767679 | 0          | 16 | 0 | 0.91308053 | 0 |
| chr8 | 96432931 | 96530476 | 97546  | 1  | 11 | 0 | 0.0331093  | 0          | 15 | 0 | 0.71538971 | 0 |
| chr8 | 96530476 | 96764742 | 234267 | 2  | 11 | 0 | 0.0574087  | 0          | 14 | 0 | 0.5498098  | 0 |
| chr8 | 96764742 | 96846254 | 81513  | 2  | 11 | 0 | 0.0331093  | 0          | 15 | 0 | 0.71538971 | 0 |
| chr8 | 96846254 | 96846313 | 60     | 1  | 13 | 0 | 0.05490675 | 0          | 16 | 0 | 0.55623409 | 0 |
| chr8 | 96846313 | 96936902 | 90590  | 1  | 12 | 0 | 0.14385241 | 0          | 13 | 0 | 0.30102999 | 0 |
| chr8 | 96936902 | 97014872 | 77971  | 1  | 12 | 0 | 0.30102999 | 0          | 11 | 0 | 0.14385241 | 0 |
| chr8 | 97014872 | 97014931 | 60     | 1  | 12 | 0 | 0.21227046 | 0          | 12 | 0 | 0.21227046 | 0 |
| chr8 | 97014931 | 97180081 | 165151 | 2  | 12 | 0 | 0.30102999 | 0          | 11 | 0 | 0.14385241 | 0 |
| chr8 | 97180081 | 97599692 | 419612 | 12 | 12 | 0 | 0.09290028 | 0          | 14 | 0 | 0.41314172 | 0 |
| chr8 | 97599692 | 97670469 | 70778  | 3  | 13 | 0 | 0.14303407 | 0          | 14 | 0 | 0.30102999 | 0 |
| chr8 | 97670469 | 97744108 | 73640  | 3  | 13 | 0 | 0.09154957 | 0          | 15 | 0 | 0.41444892 | 0 |
| chr8 | 97744108 | 97839787 | 95680  | 3  | 13 | 0 | 0.05490675 | 0          | 16 | 0 | 0.55623409 | 0 |
| chr8 | 97839787 | 97894579 | 54793  | 2  | 13 | 0 | 0.03037338 | 0          | 17 | 0 | 0.73110763 | 0 |
| chr8 | 97894579 | 97894638 | 60     | 1  | 14 | 0 | 0.05232577 | 0          | 17 | 0 | 0.56314362 | 0 |
| chr8 | 97894638 | 98078238 | 183601 | 4  | 13 | 0 | 0.03037338 | 0          | 17 | 0 | 0.73110763 | 0 |
| chr8 | 98078238 | 98156892 | 78655  | 3  | 14 | 0 | 0.05232577 | 0          | 17 | 0 | 0.56314362 | 0 |
| chr8 | 98156892 | 98237667 | 80776  | 1  | 13 | 0 | 0.03037338 | 0          | 17 | 0 | 0.73110763 | 0 |
| chr8 | 98237667 | 98237726 | 60     | 1  | 13 | 1 | 0.03037338 | 0.30102999 | 17 | 0 | 0.73110763 | 0 |
| chr8 | 98237726 | 98285813 | 48088  | 1  | 13 | 0 | 0.03037338 | 0          | 17 | 0 | 0.73110763 | 0 |
| chr8 | 98285813 | 98324149 | 38337  | 4  | 14 | 0 | 0.05232577 | 0          | 17 | 0 | 0.56314362 | 0 |
| chr8 | 98324149 | 98324208 | 60     | 1  | 15 | 0 | 0.08584816 | 0          | 17 | 0 | 0.42015402 | 0 |
| chr8 | 98324208 | 98432309 | 108102 | 2  | 14 | 0 | 0.05232577 | 0          | 17 | 0 | 0.56314362 | 0 |
| chr8 | 98432309 | 98560897 | 128589 | 1  | 14 | 0 | 0.08923391 | 0          | 16 | 0 | 0.4167287  | 0 |
| chr8 | 98560897 | 98560956 | 60     | 1  | 15 | 0 | 0.13872638 | 0          | 16 | 0 | 0.30102999 | 0 |
| chr8 | 98560956 | 98673425 | 112470 | 2  | 14 | 0 | 0.08923391 | 0          | 16 | 0 | 0.4167287  | 0 |
| chr8 | 98673425 | 98906274 | 232850 | 7  | 13 | 0 | 0.05490675 | 0          | 16 | 0 | 0.55623409 | 0 |
| chr8 | 98906274 | 99005555 | 99282  | 3  | 13 | 0 | 0.03037338 | 0          | 17 | 0 | 0.73110763 | 0 |
| chr8 | 99005555 | 99266324 | 260770 | 9  | 15 | 1 | 0.08584816 | 0.30102999 | 17 | 0 | 0.42015402 | 0 |
| chr8 | 99266324 | 99291095 | 24772  | 1  | 14 | 1 | 0.21118145 | 0.30102999 | 14 | 0 | 0.21118145 | 0 |
| chr8 | 99291095 | 99417167 | 126073 | 3  | 14 | 1 | 0.14135546 | 0.30102999 | 15 | 0 | 0.30102999 | 0 |
| chr8 | 99417167 | 99417226 | 60     | 1  | 15 | 1 | 0.08584816 | 0.30102999 | 17 | 0 | 0.42015402 | 0 |
| chr8 | 99417226 | 99527300 | 110075 | 2  | 15 | 0 | 0.13872638 | 0          | 16 | 0 |            |   |

|      |           |           |        |    |    |   |            |   |    |   |            |   |
|------|-----------|-----------|--------|----|----|---|------------|---|----|---|------------|---|
| chr8 | 101864506 | 101947980 | 83475  | 2  | 14 | 0 | 0.02793176 | 0 | 18 | 0 | 0.74627054 | 0 |
| chr8 | 101947980 | 101953221 | 5242   | 2  | 15 | 0 | 0.04875589 | 0 | 18 | 0 | 0.5732208  | 0 |
| chr8 | 101953221 | 102067097 | 113877 | 1  | 15 | 0 | 0.13872638 | 0 | 16 | 0 | 0.30102999 | 0 |
| chr8 | 102067097 | 102137815 | 70719  | 2  | 16 | 0 | 0.13499366 | 0 | 17 | 0 | 0.30102999 | 0 |
| chr8 | 102137815 | 102273350 | 135536 | 6  | 17 | 0 | 0.129913   | 0 | 18 | 0 | 0.30102999 | 0 |
| chr8 | 102273350 | 102273409 | 60     | 1  | 17 | 0 | 0.07511598 | 0 | 19 | 0 | 0.43181735 | 0 |
| chr8 | 102273409 | 102381990 | 108582 | 1  | 16 | 0 | 0.04407651 | 0 | 19 | 0 | 0.58747015 | 0 |
| chr8 | 102381990 | 102422643 | 40654  | 1  | 16 | 0 | 0.08122616 | 0 | 18 | 0 | 0.4250187  | 0 |
| chr8 | 102422643 | 102611301 | 188659 | 4  | 16 | 0 | 0.13499366 | 0 | 17 | 0 | 0.30102999 | 0 |
| chr8 | 102611301 | 102698924 | 87624  | 4  | 16 | 0 | 0.08122616 | 0 | 18 | 0 | 0.4250187  | 0 |
| chr8 | 102698924 | 102698975 | 52     | 1  | 16 | 0 | 0.0079614  | 0 | 21 | 0 | 1.07548421 | 0 |
| chr8 | 102698975 | 102731660 | 32686  | 1  | 16 | 0 | 0.02074938 | 0 | 20 | 0 | 0.79906872 | 0 |
| chr8 | 102731660 | 102755472 | 23813  | 2  | 17 | 0 | 0.03812622 | 0 | 20 | 0 | 0.60763643 | 0 |
| chr8 | 102755472 | 102803078 | 47607  | 1  | 17 | 0 | 0.07511598 | 0 | 19 | 0 | 0.43181735 | 0 |
| chr8 | 102803078 | 102803133 | 56     | 1  | 17 | 0 | 0.03812622 | 0 | 20 | 0 | 0.60763643 | 0 |
| chr8 | 102803133 | 102868211 | 65079  | 1  | 16 | 0 | 0.02074938 | 0 | 20 | 0 | 0.79906872 | 0 |
| chr8 | 102868211 | 102968972 | 100762 | 2  | 16 | 0 | 0.04407651 | 0 | 19 | 0 | 0.58747015 | 0 |
| chr8 | 102968972 | 103113904 | 144933 | 5  | 17 | 0 | 0.03812622 | 0 | 20 | 0 | 0.60763643 | 0 |
| chr8 | 103113904 | 103205695 | 91792  | 2  | 17 | 0 | 0.01598258 | 0 | 21 | 0 | 0.84395715 | 0 |
| chr8 | 103205695 | 103247710 | 42016  | 1  | 17 | 0 | 0.03812622 | 0 | 20 | 0 | 0.60763643 | 0 |
| chr8 | 103247710 | 103389163 | 144454 | 3  | 16 | 0 | 0.02074938 | 0 | 20 | 0 | 0.79906872 | 0 |
| chr8 | 103389163 | 103515061 | 125899 | 4  | 17 | 0 | 0.03812622 | 0 | 20 | 0 | 0.60763643 | 0 |
| chr8 | 103515061 | 103589803 | 74743  | 3  | 16 | 0 | 0.02074938 | 0 | 20 | 0 | 0.79906872 | 0 |
| chr8 | 103589803 | 103589862 | 60     | 1  | 17 | 0 | 0.03812622 | 0 | 20 | 0 | 0.60763643 | 0 |
| chr8 | 103589862 | 103664630 | 74769  | 2  | 16 | 0 | 0.02074938 | 0 | 20 | 0 | 0.79906872 | 0 |
| chr8 | 103664630 | 103769626 | 104997 | 1  | 16 | 0 | 0.08122616 | 0 | 18 | 0 | 0.4250187  | 0 |
| chr8 | 103769626 | 103769685 | 60     | 1  | 17 | 0 | 0.129913   | 0 | 18 | 0 | 0.30102999 | 0 |
| chr8 | 103769685 | 103841492 | 71808  | 1  | 16 | 0 | 0.13499366 | 0 | 17 | 0 | 0.30102999 | 0 |
| chr8 | 103841492 | 103841551 | 60     | 1  | 16 | 0 | 0.08122616 | 0 | 18 | 0 | 0.4250187  | 0 |
| chr8 | 103841551 | 103954240 | 112690 | 3  | 15 | 0 | 0.04875589 | 0 | 18 | 0 | 0.5732208  | 0 |
| chr8 | 103954240 | 103954299 | 60     | 1  | 15 | 0 | 0.02473314 | 0 | 19 | 0 | 0.76806864 | 0 |
| chr8 | 103954299 | 104102022 | 147724 | 3  | 15 | 0 | 0.08584816 | 0 | 17 | 0 | 0.42015402 | 0 |
| chr8 | 104102022 | 104102081 | 60     | 1  | 15 | 0 | 0.04875589 | 0 | 18 | 0 | 0.5732208  | 0 |
| chr8 | 104102081 | 104197966 | 95886  | 2  | 15 | 0 | 0.08584816 | 0 | 17 | 0 | 0.42015402 | 0 |
| chr8 | 104197966 | 104198025 | 60     | 1  | 15 | 0 | 0.04875589 | 0 | 18 | 0 | 0.5732208  | 0 |
| chr8 | 104198025 | 104499594 | 301570 | 11 | 15 | 0 | 0.08584816 | 0 | 17 | 0 | 0.42015402 | 0 |
| chr8 | 104499594 | 104853259 | 353666 | 9  | 15 | 0 | 0.04875589 | 0 | 18 | 0 | 0.5732208  | 0 |
| chr8 | 104853259 | 104853318 | 60     | 1  | 15 | 0 | 0.02473314 | 0 | 19 | 0 | 0.76806864 | 0 |
| chr8 | 104853318 | 105087630 | 234313 | 7  | 14 | 0 | 0.05232577 | 0 | 17 | 0 | 0.56314362 | 0 |
| chr8 | 105087630 | 105225087 | 137458 | 2  | 14 | 0 | 0.08923391 | 0 | 16 | 0 | 0.4167287  | 0 |
| chr8 | 105225087 | 105261842 | 36756  | 1  | 14 | 0 | 0.21118145 | 0 | 14 | 0 | 0.21118145 | 0 |
| chr8 | 105261842 | 105358106 | 96265  | 2  | 12 | 0 | 0.09290028 | 0 | 14 | 0 | 0.41314172 | 0 |
| chr8 | 105358106 | 105394000 | 35895  | 1  | 10 | 0 | 0.0574087  | 0 | 13 | 0 | 0.5498098  | 0 |
| chr8 | 105394000 | 105436584 | 42585  | 1  | 10 | 0 | 0.09290028 | 0 | 12 | 0 | 0.41314172 | 0 |
| chr8 | 105436584 | 105476947 | 40364  | 2  | 12 | 0 | 0.09290028 | 0 | 14 | 0 | 0.41314172 | 0 |
| chr8 | 105476947 | 105477006 | 60     | 1  | 12 | 0 | 0.0565833  | 0 | 15 | 0 | 0.55190077 | 0 |
| chr8 | 105477006 | 105509388 | 32383  | 1  | 12 | 0 | 0.09290028 | 0 | 14 | 0 | 0.41314172 | 0 |
| chr8 | 105509388 | 105544140 | 34753  | 2  | 12 | 0 | 0.03209937 | 0 | 16 | 0 | 0.72109894 | 0 |
| chr8 | 105544140 | 105564361 | 20222  | 2  | 12 | 0 | 0.00778066 | 0 | 18 | 0 | 1.17038931 | 0 |
| chr8 | 105564361 | 105610940 | 46580  | 2  | 12 | 0 | 0.01667721 | 0 | 17 | 0 | 0.92532268 | 0 |
| chr8 | 105610940 | 105788086 | 177147 | 1  | 12 | 0 | 0.0565833  | 0 | 15 | 0 | 0.55190077 | 0 |
| chr8 | 105788086 | 105914640 | 126555 | 1  | 11 | 0 | 0.0331093  | 0 | 15 | 0 | 0.71538971 | 0 |
| chr8 | 105914640 | 105914699 | 60     | 1  | 11 | 0 | 0.01767679 | 0 | 16 | 0 | 0.91308053 | 0 |
| chr8 | 105914699 | 106240525 | 325827 | 2  | 11 | 0 | 0.0331093  | 0 | 15 | 0 | 0.71538971 | 0 |
| chr8 | 106240525 | 106240584 | 60     | 1  | 11 | 0 | 0.01767679 | 0 | 16 | 0 | 0.91308053 | 0 |
| chr8 | 106240584 | 106319209 | 78626  | 1  | 10 | 0 | 0.00909834 | 0 | 16 | 0 | 1.13428373 | 0 |
| chr8 | 106319209 | 106400112 | 80904  | 1  | 10 | 0 | 0.01817691 | 0 | 15 | 0 | 0.90719478 | 0 |
| chr8 | 106400112 | 106461292 | 61181  | 3  | 11 | 0 | 0.0331093  | 0 | 15 | 0 | 0.71538971 | 0 |
| chr8 | 106461292 | 106503389 | 42098  | 2  | 11 | 0 | 0.01767679 | 0 | 16 | 0 | 0.91308053 | 0 |
| chr8 | 106503389 | 106503448 | 60     | 1  | 12 | 0 | 0.03209937 | 0 | 16 | 0 | 0.72109894 | 0 |
| chr8 | 106503448 | 106639222 | 135775 | 2  | 12 | 0 | 0.0574087  | 0 | 14 | 0 | 0.5498098  | 0 |
| chr8 | 106639222 | 106705607 | 66386  | 2  | 12 | 0 | 0.0565833  | 0 | 15 | 0 | 0.55190077 | 0 |
| chr8 | 106705607 | 106746062 | 40456  | 2  | 14 | 0 | 0.14135546 | 0 | 15 | 0 | 0.30102999 | 0 |
| chr8 | 106746062 | 107025536 | 279475 | 4  | 14 | 0 | 0.21118145 | 0 | 14 | 0 | 0.21118145 | 0 |
| chr8 | 107025536 | 107104446 | 78611  | 2  | 15 | 0 | 0.30102999 | 0 | 14 | 0 | 0.14135546 | 0 |
| chr8 | 107104446 | 107243362 | 138217 | 1  | 13 | 0 | 0.14303407 | 0 | 14 | 0 | 0.30102999 | 0 |
| chr8 | 107243362 | 107307812 | 64451  | 2  | 13 | 0 | 0.09154957 | 0 | 15 | 0 | 0.14144892 | 0 |
| chr8 | 107307812 | 107441071 | 132260 | 4  | 15 | 0 | 0.13872638 | 0 | 16 | 0 | 0.30102999 | 0 |
| chr8 | 107441071 | 107472460 | 31390  | 2  | 15 | 0 | 0.08584816 | 0 | 17 | 0 | 0.42015402 | 0 |
| chr8 | 107472460 | 107561136 | 88677  | 2  | 14 | 0 | 0.08923391 | 0 | 16 | 0 | 0.4167287  | 0 |
| chr8 | 107561136 | 107561195 | 60     | 1  | 15 | 0 | 0.08584816 | 0 | 17 | 0 | 0.42015402 | 0 |
| chr8 | 107561195 | 107669943 | 108749 | 2  | 14 | 0 | 0.08923391 | 0 | 16 | 0 | 0.4167287  | 0 |
| chr8 | 107669943 | 107733014 | 63072  | 3  | 14 | 0 | 0.05232577 | 0 | 17 | 0 | 0.56314362 | 0 |
| chr8 | 107733014 | 107764000 | 30987  | 2  | 14 | 0 | 0.21118145 | 0 | 14 | 0 | 0.21118145 | 0 |
| chr8 | 107764000 | 107782117 | 18118  | 2  | 15 | 0 | 0.13872638 | 0 | 16 | 0 | 0.30102999 | 0 |
| chr8 | 107782117 | 107852627 | 70511  | 1  | 14 | 0 | 0.14135546 | 0 | 15 | 0 | 0.30102999 | 0 |
| chr8 | 107852627 | 108145484 | 292858 | 2  | 14 | 0 | 0.21118145 | 0 | 14 | 0 | 0.21118145 | 0 |
| chr8 | 108145484 | 108262935 | 117452 | 3  | 15 | 0 | 0.20975986 | 0 | 15 | 0 | 0.20975986 | 0 |
| chr8 | 108262935 | 108348430 | 85496  | 3  | 15 | 0 | 0.08584816 | 0 | 17 | 0 | 0.42015402 | 0 |
| chr8 | 108348430 | 108413208 | 64779  | 1  | 15 | 0 | 0.13872638 | 0 | 16 | 0 | 0.30102999 | 0 |
| chr8 | 108413208 | 108448796 | 35589  | 2  | 15 | 0 | 0.08584816 | 0 | 17 | 0 | 0.42015402 | 0 |
| chr8 | 108448796 | 108512442 | 63647  | 1  | 14 | 0 | 0.21118145 | 0 | 14 | 0 | 0.21118145 | 0 |
| chr8 | 108512442 | 108633452 | 121011 | 1  | 13 | 0 | 0.30102999 | 0 | 12 | 0 | 0.14385241 | 0 |
| chr8 | 108633452 | 108762923 | 129472 | 1  | 12 | 0 | 0.30102999 | 0 | 11 | 0 | 0.14385241 | 0 |
| chr8 | 108762923 | 108917256 | 154334 | 1  | 11 | 0 | 0.21200206 | 0 | 11 | 0 | 0.21200206 | 0 |
| chr8 | 108917256 | 108942691 | 25436  | 2  | 12 | 0 | 0.21227046 | 0 | 12 | 0 | 0.21227046 | 0 |
| chr8 | 108942691 | 109009030 | 66340  | 1  | 10 | 0 | 0.09290028 | 0 | 12 | 0 | 0.41314172 | 0 |
| chr8 | 109009030 | 109058489 | 49460  | 1  | 10 | 0 | 0.14303407 | 0 | 11 | 0 | 0.30102999 | 0 |
| chr8 | 109058489 | 109248528 | 190040 | 5  | 11 | 0 | 0.21200206 | 0 | 11 | 0 | 0.21200206 | 0 |
| chr8 | 109248528 | 109498859 | 250332 | 5  | 11 | 0 | 0.30102999 | 0 | 10 | 0 | 0.14303407 | 0 |
| chr8 | 109498859 | 109567858 | 69000  | 1  | 10 | 0 | 0.21118145 | 0 | 10 | 0 | 0.21118145 | 0 |
| chr8 | 109567858 | 109619675 | 51818  | 2  | 10 | 0 | 0.14303407 | 0 | 11 | 0 | 0.30102999 | 0 |
| chr8 | 109619675 | 109677828 | 58154  | 2  | 11 | 0 | 0.14385241 | 0 | 12 | 0 | 0.30102999 | 0 |
| chr8 | 109677828 | 109677887 | 60     | 1  | 12 | 0 | 0.21227046 | 0 | 12 | 0 | 0.21227046 | 0 |
| chr8 | 109677887 | 109774130 | 96244  | 2  | 12 | 0 | 0.30102999 | 0 | 11 | 0 | 0.14385241 | 0 |
| chr8 | 109774130 | 109862169 | 88040  | 2  | 11 | 0 | 0.30102999 | 0 | 10 | 0 | 0.14303407 | 0 |
| chr8 | 109862169 | 110051157 | 188989 | 1  | 10 | 0 | 0.4167287  | 0 | 8  | 0 | 0.08923391 | 0 |
| chr8 | 110051157 | 110453542 | 402386 | 10 | 9  | 0 | 0.30102999 | 0 | 8  | 0 | 0.13872638 | 0 |
| chr8 | 110453542 | 110527427 | 73886  | 2  | 9  | 0 | 0.42015402 | 0 | 7  | 0 | 0.08584816 | 0 |
| chr8 | 110527427 | 110573111 | 45685  | 2  | 9  | 0 | 0.30102999 | 0 | 8  | 0 | 0.13872638 | 0 |

|      |           |           |        |    |    |   |            |   |    |   |            |            |
|------|-----------|-----------|--------|----|----|---|------------|---|----|---|------------|------------|
| chr8 | 114173007 | 114317923 | 144517 | 4  | 13 | 0 | 0.14303407 | 0 | 14 | 1 | 0.30102999 | 0.30102999 |
| chr8 | 114317923 | 114380869 | 62947  | 2  | 13 | 0 | 0.09154957 | 0 | 15 | 1 | 0.41444892 | 0.30102999 |
| chr8 | 114380869 | 114450308 | 69440  | 1  | 13 | 0 | 0.09154957 | 0 | 15 | 0 | 0.41444892 | 0          |
| chr8 | 114450308 | 114633352 | 183045 | 1  | 12 | 0 | 0.0565833  | 0 | 15 | 0 | 0.55190077 | 0          |
| chr8 | 114633352 | 114863900 | 230549 | 1  | 12 | 0 | 0.14385241 | 0 | 13 | 0 | 0.30102999 | 0          |
| chr8 | 114863900 | 114962376 | 98477  | 1  | 11 | 0 | 0.09334429 | 0 | 13 | 0 | 0.41271556 | 0          |
| chr8 | 114962376 | 115124554 | 162179 | 1  | 11 | 0 | 0.14385241 | 0 | 12 | 0 | 0.30102999 | 0          |
| chr8 | 115124554 | 115430637 | 306084 | 2  | 8  | 0 | 0.13872638 | 0 | 9  | 0 | 0.30102999 | 0          |
| chr8 | 115430637 | 115430696 | 60     | 1  | 8  | 0 | 0.08923391 | 0 | 10 | 0 | 0.41672387 | 0          |
| chr8 | 115430696 | 115656140 | 225445 | 1  | 8  | 0 | 0.20764654 | 0 | 8  | 0 | 0.20764654 | 0          |
| chr8 | 115656140 | 115803228 | 147089 | 2  | 10 | 0 | 0.0574087  | 0 | 13 | 0 | 0.5498098  | 0          |
| chr8 | 115803228 | 115803287 | 60     | 1  | 11 | 0 | 0.01767679 | 0 | 16 | 0 | 0.91308053 | 0          |
| chr8 | 115803287 | 116002879 | 199593 | 2  | 10 | 0 | 0.0574087  | 0 | 13 | 0 | 0.5498098  | 0          |
| chr8 | 116002879 | 116002938 | 60     | 1  | 11 | 0 | 0.00859896 | 0 | 17 | 0 | 1.14735594 | 0          |
| chr8 | 116002938 | 116617156 | 614219 | 7  | 10 | 0 | 0.03344703 | 0 | 14 | 0 | 0.71353304 | 0          |
| chr8 | 116617156 | 116676778 | 59623  | 1  | 10 | 0 | 0.0574087  | 0 | 13 | 0 | 0.5498098  | 0          |
| chr8 | 116676778 | 116948828 | 272051 | 2  | 10 | 0 | 0.14303407 | 0 | 11 | 0 | 0.30102999 | 0          |
| chr8 | 116948828 | 116948887 | 60     | 1  | 12 | 0 | 0.21227046 | 0 | 12 | 0 | 0.21227046 | 0          |
| chr8 | 116948887 | 117197436 | 248550 | 4  | 12 | 0 | 0.30102999 | 0 | 11 | 0 | 0.14385241 | 0          |
| chr8 | 117197436 | 117197495 | 60     | 1  | 13 | 0 | 0.21200206 | 0 | 13 | 0 | 0.21200206 | 0          |
| chr8 | 117197495 | 117656808 | 459314 | 2  | 13 | 0 | 0.30102999 | 0 | 12 | 0 | 0.14385241 | 0          |
| chr8 | 117656808 | 117694957 | 42690  | 1  | 13 | 0 | 0.21200206 | 0 | 13 | 0 | 0.21200206 | 0          |
| chr8 | 117694957 | 117884939 | 185443 | 4  | 13 | 0 | 0.30102999 | 0 | 12 | 0 | 0.14385241 | 0          |
| chr8 | 117884939 | 118391347 | 506409 | 9  | 14 | 0 | 0.30102999 | 0 | 13 | 0 | 0.14303407 | 0          |
| chr8 | 118391347 | 118806849 | 415503 | 5  | 14 | 0 | 0.21118145 | 0 | 14 | 0 | 0.21118145 | 0          |
| chr8 | 118806849 | 119418329 | 611481 | 12 | 14 | 0 | 0.14135546 | 0 | 15 | 0 | 0.30102999 | 0          |
| chr8 | 119418329 | 119682877 | 264549 | 6  | 15 | 0 | 0.20975986 | 0 | 15 | 0 | 0.20975986 | 0          |
| chr8 | 119682877 | 119886789 | 203913 | 2  | 15 | 0 | 0.13872638 | 0 | 16 | 0 | 0.30102999 | 0          |
| chr8 | 119886789 | 119957106 | 70318  | 3  | 15 | 0 | 0.08584816 | 0 | 17 | 0 | 0.42015402 | 0          |
| chr8 | 119957106 | 120079510 | 122405 | 2  | 15 | 0 | 0.13872638 | 0 | 16 | 0 | 0.30102999 | 0          |
| chr8 | 120079510 | 120079562 | 53     | 1  | 15 | 0 | 0.08584816 | 0 | 17 | 0 | 0.42015402 | 0          |
| chr8 | 120079562 | 120429746 | 350185 | 6  | 15 | 0 | 0.13872638 | 0 | 16 | 0 | 0.30102999 | 0          |
| chr8 | 120429746 | 120580415 | 150670 | 4  | 16 | 0 | 0.20764654 | 0 | 16 | 0 | 0.20764654 | 0          |
| chr8 | 120580415 | 120602816 | 22402  | 2  | 17 | 0 | 0.20469099 | 0 | 17 | 0 | 0.20469099 | 0          |
| chr8 | 120602816 | 120651018 | 48203  | 2  | 17 | 0 | 0.42015402 | 0 | 15 | 0 | 0.08584816 | 0          |
| chr8 | 120651018 | 121444240 | 793223 | 22 | 17 | 0 | 0.129913   | 0 | 18 | 0 | 0.30102999 | 0          |
| chr8 | 121444240 | 121747270 | 303031 | 12 | 17 | 0 | 0.07511598 | 0 | 19 | 0 | 0.43181735 | 0          |
| chr8 | 121747270 | 122142883 | 395614 | 4  | 17 | 0 | 0.129913   | 0 | 18 | 0 | 0.30102999 | 0          |
| chr8 | 122142883 | 122329549 | 186667 | 1  | 16 | 0 | 0.20764654 | 0 | 16 | 0 | 0.20764654 | 0          |
| chr8 | 122329549 | 122494596 | 165048 | 1  | 15 | 0 | 0.30102999 | 0 | 14 | 0 | 0.14135546 | 0          |
| chr8 | 122494596 | 122637617 | 143022 | 1  | 12 | 0 | 0.41314172 | 0 | 10 | 0 | 0.09290028 | 0          |
| chr8 | 122637617 | 122637676 | 60     | 1  | 12 | 0 | 0.30102999 | 0 | 11 | 0 | 0.14385241 | 0          |
| chr8 | 122637676 | 122653162 | 15487  | 2  | 12 | 0 | 0.41314172 | 0 | 10 | 0 | 0.09290028 | 0          |
| chr8 | 122653162 | 122653221 | 60     | 1  | 12 | 0 | 0.30102999 | 0 | 11 | 0 | 0.14385241 | 0          |
| chr8 | 122653221 | 122863357 | 210137 | 1  | 12 | 0 | 0.92532268 | 0 | 7  | 0 | 0.01667721 | 0          |
| chr8 | 122863357 | 122863416 | 60     | 1  | 12 | 0 | 0.72109894 | 0 | 8  | 0 | 0.03209037 | 0          |
| chr8 | 122863416 | 123165226 | 301811 | 3  | 8  | 0 | 0.79906872 | 0 | 4  | 0 | 0.02074938 | 0          |
| chr8 | 123165226 | 123165285 | 60     | 1  | 11 | 0 | 0.73110763 | 0 | 7  | 0 | 0.03037338 | 0          |
| chr8 | 123165285 | 123431150 | 265866 | 1  | 11 | 0 | 0.9449689  | 0 | 6  | 0 | 0.01518174 | 0          |
| chr8 | 123431150 | 123538325 | 107176 | 2  | 13 | 0 | 0.30102999 | 0 | 12 | 0 | 0.14385241 | 0          |
| chr8 | 123538325 | 123538384 | 60     | 1  | 14 | 0 | 0.41314172 | 0 | 12 | 0 | 0.09290028 | 0          |
| chr8 | 123538384 | 123743989 | 205606 | 2  | 12 | 0 | 0.30102999 | 0 | 11 | 0 | 0.14385241 | 0          |
| chr8 | 123743989 | 123812877 | 68889  | 2  | 13 | 0 | 0.21200206 | 0 | 13 | 0 | 0.21200206 | 0          |
| chr8 | 123812877 | 123852933 | 40057  | 2  | 14 | 0 | 0.21118145 | 0 | 14 | 0 | 0.21118145 | 0          |
| chr8 | 123852933 | 124042821 | 189889 | 4  | 14 | 0 | 0.30102999 | 0 | 13 | 0 | 0.14303407 | 0          |
| chr8 | 124042821 | 124115445 | 72625  | 3  | 14 | 0 | 0.05232577 | 0 | 17 | 0 | 0.56314362 | 0          |
| chr8 | 124115445 | 124403872 | 288428 | 13 | 15 | 0 | 0.08584816 | 0 | 17 | 0 | 0.42015402 | 0          |
| chr8 | 124403872 | 124453740 | 49869  | 2  | 15 | 0 | 0.02473314 | 0 | 19 | 0 | 0.76806864 | 0          |
| chr8 | 124453740 | 124453799 | 60     | 1  | 16 | 0 | 0.02074938 | 0 | 20 | 0 | 0.79906872 | 0          |
| chr8 | 124453799 | 124551697 | 97899  | 2  | 16 | 0 | 0.04407651 | 0 | 19 | 0 | 0.58747015 | 0          |
| chr8 | 124551697 | 124706038 | 154342 | 4  | 17 | 0 | 0.03812622 | 0 | 20 | 0 | 0.60763643 | 0          |
| chr8 | 124706038 | 124746836 | 40799  | 1  | 17 | 0 | 0.07511598 | 0 | 19 | 0 | 0.43181735 | 0          |
| chr8 | 124746836 | 124922842 | 176007 | 4  | 16 | 0 | 0.04407651 | 0 | 19 | 0 | 0.58747015 | 0          |
| chr8 | 124922842 | 125025913 | 103072 | 3  | 17 | 0 | 0.07511598 | 0 | 19 | 0 | 0.43181735 | 0          |
| chr8 | 125025913 | 125058412 | 32500  | 3  | 17 | 0 | 0.03812622 | 0 | 20 | 0 | 0.60763643 | 0          |
| chr8 | 125058412 | 125137486 | 79075  | 2  | 16 | 0 | 0.04407651 | 0 | 19 | 0 | 0.58747015 | 0          |
| chr8 | 125137486 | 125137545 | 60     | 1  | 17 | 0 | 0.07511598 | 0 | 19 | 0 | 0.43181735 | 0          |
| chr8 | 125137545 | 125908133 | 770589 | 18 | 16 | 0 | 0.04407651 | 0 | 19 | 0 | 0.58747015 | 0          |
| chr8 | 125908133 | 126011610 | 103478 | 4  | 17 | 0 | 0.07511598 | 0 | 19 | 0 | 0.43181735 | 0          |
| chr8 | 126011610 | 126061312 | 49703  | 2  | 17 | 0 | 0.129913   | 0 | 18 | 0 | 0.30102999 | 0          |
| chr8 | 126061312 | 126102049 | 40738  | 2  | 17 | 0 | 0.07511598 | 0 | 19 | 0 | 0.43181735 | 0          |
| chr8 | 126102049 | 126131821 | 29773  | 1  | 16 | 0 | 0.04407651 | 0 | 19 | 0 | 0.58747015 | 0          |
| chr8 | 126131821 | 126163413 | 31593  | 1  | 15 | 0 | 0.02473314 | 0 | 19 | 0 | 0.76806864 | 0          |
| chr8 | 126163413 | 126449694 | 286282 | 7  | 16 | 0 | 0.04407651 | 0 | 19 | 0 | 0.58747015 | 0          |
| chr8 | 126449694 | 126800956 | 351263 | 3  | 15 | 0 | 0.02473314 | 0 | 19 | 0 | 0.76806864 | 0          |
| chr8 | 126800956 | 127095547 | 294592 | 5  | 16 | 0 | 0.04407651 | 0 | 19 | 0 | 0.58747015 | 0          |
| chr8 | 127095547 | 127146431 | 50885  | 1  | 16 | 0 | 0.08122616 | 0 | 18 | 0 | 0.4250187  | 0          |
| chr8 | 127146431 | 127247560 | 101130 | 1  | 15 | 0 | 0.04875589 | 0 | 18 | 0 | 0.5732208  | 0          |
| chr8 | 127247560 | 127389078 | 141519 | 1  | 15 | 0 | 0.08584816 | 0 | 17 | 0 | 0.42015402 | 0          |
| chr8 | 127389078 | 127770332 | 381255 | 6  | 16 | 0 | 0.17538971 | 0 | 11 | 0 | 0.0331093  | 0          |
| chr8 | 127770332 | 127770391 | 60     | 1  | 16 | 0 | 0.20764654 | 0 | 16 | 0 | 0.20764654 | 0          |
| chr8 | 127770391 | 128052290 | 281900 | 2  | 16 | 0 | 0.30102999 | 0 | 15 | 0 | 0.13872638 | 0          |
| chr8 | 128052290 | 128052349 | 60     | 1  | 17 | 0 | 0.20469099 | 0 | 17 | 0 | 0.20469099 | 0          |
| chr8 | 128052349 | 128174165 | 121817 | 1  | 17 | 0 | 0.73110763 | 0 | 13 | 0 | 0.03037338 | 0          |
| chr8 | 128174165 | 128232861 | 58697  | 1  | 15 | 0 | 0.41444892 | 0 | 13 | 0 | 0.09154957 | 0          |
| chr8 | 128232861 | 128401403 | 168543 | 3  | 15 | 0 | 0.30102999 | 0 | 14 | 0 | 0.14135546 | 0          |
| chr8 | 128401403 | 128479520 | 78118  | 2  | 17 | 0 | 0.56314362 | 0 | 14 | 0 | 0.05232577 | 0          |
| chr8 | 128479520 | 128707459 | 227940 | 1  | 15 | 0 | 0.30102999 | 0 | 14 | 0 | 0.14135546 | 0          |
| chr8 | 128707459 | 128828456 | 120998 | 6  | 15 | 0 | 0.20975986 | 0 | 15 | 0 | 0.20975986 | 0          |
| chr8 | 128828456 | 128866097 | 57642  | 2  | 15 | 0 | 0.13872638 | 0 | 16 | 0 | 0.30102999 | 0          |
| chr8 | 128866097 | 128931603 | 45507  | 1  | 15 | 0 | 0.30102999 | 0 | 14 | 0 | 0.14135546 | 0          |
| chr8 | 128931603 | 129046130 | 114528 | 5  | 15 | 0 | 0.20975986 | 0 | 15 | 0 | 0.20975986 | 0          |
| chr8 | 129046130 | 129147723 | 101594 | 3  | 14 | 0 | 0.30102999 | 0 | 13 | 0 | 0.14303407 | 0          |
| chr8 | 129147723 | 129161861 | 14139  | 2  | 14 | 0 | 0.20975986 | 0 | 15 | 0 | 0.20975986 | 0          |
| chr8 | 129161861 | 129235191 | 73331  | 2  | 15 | 0 | 0.30102999 | 0 | 13 | 0 | 0.14303407 | 0          |
| chr8 | 129235191 | 129381645 | 146455 | 1  | 14 | 0 | 0.41314172 | 0 | 12 | 0 | 0.09290028 | 0          |
| chr8 | 129381645 | 129381704 | 60     | 1  | 15 | 0 | 0.41444892 | 0 | 13 | 0 | 0.09154957 | 0          |
| chr8 | 129381704 | 129505388 | 123685 | 1  | 14 | 0 | 0.30102999 | 0 | 13 | 0 | 0.14303407 | 0          |
| chr8 | 129505388 | 129505447 | 60     | 1  | 14 | 0 | 0.08923391 | 0 | 16 | 0 | 0.41672387 | 0          |
| chr8 | 129505447 | 129641936 | 136490 | 1  | 14 | 0 | 0.1        |   |    |   |            |            |

|      |           |           |        |    |    |   |            |   |    |   |            |            |
|------|-----------|-----------|--------|----|----|---|------------|---|----|---|------------|------------|
| chr8 | 132201275 | 132435042 | 233768 | 1  | 13 | 0 | 0.14303407 | 0 | 14 | 0 | 0.30102999 | 0          |
| chr8 | 132435042 | 132495569 | 60528  | 1  | 13 | 0 | 0.21200206 | 0 | 13 | 0 | 0.21200206 | 0          |
| chr8 | 132495569 | 132667661 | 172093 | 1  | 13 | 0 | 0.30102999 | 0 | 12 | 0 | 0.14385241 | 0          |
| chr8 | 132667661 | 132849059 | 181399 | 2  | 14 | 0 | 0.21118145 | 0 | 14 | 0 | 0.21118145 | 0          |
| chr8 | 132849059 | 132849118 | 60     | 1  | 14 | 0 | 0.08923391 | 0 | 16 | 0 | 0.4167287  | 0          |
| chr8 | 132849118 | 132942574 | 93457  | 1  | 14 | 0 | 0.30102999 | 0 | 13 | 0 | 0.14303407 | 0          |
| chr8 | 132942574 | 133150205 | 207632 | 5  | 14 | 0 | 0.41314172 | 0 | 12 | 0 | 0.09290028 | 0          |
| chr8 | 133150205 | 133318584 | 168380 | 5  | 14 | 0 | 0.21118145 | 0 | 14 | 0 | 0.21118145 | 0          |
| chr8 | 133318584 | 133396634 | 78051  | 3  | 14 | 0 | 0.02793176 | 0 | 18 | 0 | 0.74627054 | 0          |
| chr8 | 133396634 | 133584392 | 187759 | 3  | 14 | 0 | 0.05232577 | 0 | 17 | 0 | 0.56314362 | 0          |
| chr8 | 133584392 | 134031884 | 447493 | 12 | 14 | 0 | 0.02793176 | 0 | 18 | 0 | 0.74627054 | 0          |
| chr8 | 134031884 | 134147170 | 115287 | 6  | 15 | 0 | 0.04875589 | 0 | 18 | 0 | 0.5732208  | 0          |
| chr8 | 134147170 | 134233364 | 86195  | 2  | 15 | 0 | 0.08584816 | 0 | 17 | 0 | 0.42015402 | 0          |
| chr8 | 134233364 | 134307889 | 74526  | 6  | 14 | 0 | 0.08923391 | 0 | 16 | 0 | 0.4167287  | 0          |
| chr8 | 134307889 | 134585098 | 277210 | 5  | 14 | 0 | 0.14135546 | 0 | 15 | 0 | 0.30102999 | 0          |
| chr8 | 134585098 | 134649598 | 64501  | 2  | 14 | 0 | 0.08923391 | 0 | 16 | 0 | 0.4167287  | 0          |
| chr8 | 134649598 | 134649657 | 60     | 1  | 15 | 0 | 0.08584816 | 0 | 17 | 0 | 0.42015402 | 0          |
| chr8 | 134649657 | 134746618 | 96962  | 1  | 15 | 0 | 0.13872638 | 0 | 16 | 0 | 0.30102999 | 0          |
| chr8 | 134746618 | 135055947 | 309330 | 3  | 15 | 0 | 0.08584816 | 0 | 17 | 0 | 0.42015402 | 0          |
| chr8 | 135055947 | 135056006 | 60     | 1  | 16 | 0 | 0.13499366 | 0 | 17 | 0 | 0.30102999 | 0          |
| chr8 | 135056006 | 135253032 | 197027 | 1  | 14 | 0 | 0.08923391 | 0 | 16 | 0 | 0.30102999 | 0          |
| chr8 | 135253032 | 135415835 | 163804 | 1  | 11 | 0 | 0.0574087  | 0 | 14 | 0 | 0.4167287  | 0          |
| chr8 | 135415835 | 135498647 | 81813  | 1  | 11 | 0 | 0.09334429 | 0 | 13 | 0 | 0.5498098  | 0          |
| chr8 | 135498647 | 135558228 | 59582  | 2  | 11 | 0 | 0.0574087  | 0 | 14 | 0 | 0.4167287  | 0          |
| chr8 | 135558228 | 135558287 | 60     | 1  | 12 | 0 | 0.0565833  | 0 | 15 | 0 | 0.55190077 | 0          |
| chr8 | 135558287 | 135592578 | 34292  | 1  | 10 | 0 | 0.03344703 | 0 | 14 | 0 | 0.71333304 | 0          |
| chr8 | 135592578 | 135696501 | 103924 | 2  | 10 | 0 | 0.0574087  | 0 | 13 | 0 | 0.5498098  | 0          |
| chr8 | 135696501 | 135768464 | 71964  | 2  | 11 | 0 | 0.0331093  | 0 | 15 | 0 | 0.71538971 | 0          |
| chr8 | 135768464 | 135803456 | 34993  | 2  | 11 | 0 | 0.01767679 | 0 | 16 | 0 | 0.91308053 | 0          |
| chr8 | 135803456 | 135898618 | 95163  | 3  | 11 | 0 | 0.09334429 | 0 | 13 | 0 | 0.41271556 | 0          |
| chr8 | 135898618 | 135898677 | 60     | 1  | 11 | 0 | 0.0331093  | 0 | 15 | 0 | 0.71538971 | 0          |
| chr8 | 135898677 | 136533616 | 634940 | 6  | 10 | 0 | 0.09290028 | 0 | 12 | 0 | 0.41314172 | 0          |
| chr8 | 136533616 | 136554927 | 21312  | 1  | 10 | 0 | 0.21118145 | 0 | 10 | 0 | 0.21118145 | 0          |
| chr8 | 136554927 | 136809209 | 254283 | 4  | 10 | 0 | 0.30102999 | 0 | 9  | 0 | 0.14135546 | 0          |
| chr8 | 136809209 | 136958296 | 149088 | 1  | 9  | 0 | 0.30102999 | 0 | 8  | 0 | 0.13872638 | 0          |
| chr8 | 136958296 | 137325845 | 367550 | 3  | 9  | 0 | 0.5732208  | 0 | 6  | 0 | 0.04875589 | 0          |
| chr8 | 137325845 | 137325904 | 60     | 1  | 9  | 0 | 0.42015402 | 0 | 7  | 0 | 0.08584816 | 0          |
| chr8 | 137325904 | 137552141 | 226238 | 1  | 7  | 0 | 0.06763643 | 0 | 4  | 0 | 0.03812622 | 0          |
| chr8 | 137552141 | 137633745 | 81605  | 2  | 8  | 0 | 0.79906872 | 0 | 4  | 0 | 0.02074938 | 0          |
| chr8 | 137633745 | 137882966 | 249222 | 2  | 1  | 0 | 0.01091641 | 0 | 4  | 0 | 0.76005302 | 0          |
| chr8 | 137882966 | 138006813 | 123848 | 1  | 1  | 0 | 0.02438896 | 0 | 3  | 0 | 0.51676182 | 0          |
| chr8 | 138006813 | 138129879 | 123067 | 2  | 2  | 0 | 0.08289138 | 0 | 3  | 0 | 0.30102999 | 0          |
| chr8 | 138129879 | 138129938 | 60     | 1  | 8  | 0 | 0.30102999 | 0 | 7  | 0 | 0.13499366 | 0          |
| chr8 | 138129938 | 138391645 | 261708 | 2  | 8  | 0 | 0.4250187  | 0 | 6  | 0 | 0.08122616 | 0          |
| chr8 | 138391645 | 138617053 | 225409 | 2  | 9  | 0 | 0.30102999 | 0 | 8  | 0 | 0.13872638 | 0          |
| chr8 | 138617053 | 138796141 | 179089 | 2  | 9  | 0 | 0.20975986 | 0 | 9  | 0 | 0.20975986 | 0          |
| chr8 | 138796141 | 138936007 | 139867 | 2  | 9  | 0 | 0.14135546 | 0 | 10 | 0 | 0.30102999 | 0          |
| chr8 | 138936007 | 139030616 | 94610  | 2  | 10 | 0 | 0.14303407 | 0 | 11 | 0 | 0.30102999 | 0          |
| chr8 | 139030616 | 139155151 | 124536 | 3  | 11 | 0 | 0.21200206 | 0 | 11 | 0 | 0.21200206 | 0          |
| chr8 | 139155151 | 139229070 | 73920  | 3  | 12 | 0 | 0.30102999 | 0 | 11 | 0 | 0.14385241 | 0          |
| chr8 | 139229070 | 139338537 | 109468 | 2  | 12 | 0 | 0.30102999 | 0 | 10 | 0 | 0.14303407 | 0          |
| chr8 | 139338537 | 139380072 | 41536  | 2  | 11 | 0 | 0.30102999 | 0 | 11 | 0 | 0.14385241 | 0          |
| chr8 | 139380072 | 139413945 | 33874  | 1  | 11 | 0 | 0.21200206 | 0 | 11 | 0 | 0.21200206 | 0          |
| chr8 | 139413945 | 139465677 | 51733  | 2  | 11 | 0 | 0.14385241 | 0 | 12 | 0 | 0.30102999 | 0          |
| chr8 | 139465677 | 139904014 | 438338 | 10 | 12 | 0 | 0.14385241 | 0 | 13 | 0 | 0.30102999 | 0          |
| chr8 | 139904014 | 139904073 | 60     | 1  | 13 | 0 | 0.21200206 | 0 | 13 | 0 | 0.21200206 | 0          |
| chr8 | 139904073 | 140297689 | 393617 | 3  | 12 | 0 | 0.14385241 | 0 | 13 | 0 | 0.30102999 | 0          |
| chr8 | 140297689 | 140297748 | 60     | 1  | 13 | 0 | 0.21200206 | 0 | 13 | 1 | 0.30102999 | 0.30102999 |
| chr8 | 140297748 | 140427685 | 129938 | 1  | 12 | 0 | 0.21227046 | 0 | 12 | 1 | 0.21227046 | 0.30102999 |
| chr8 | 140427685 | 140682898 | 255214 | 3  | 12 | 0 | 0.14385241 | 0 | 13 | 1 | 0.30102999 | 0.30102999 |
| chr8 | 140682898 | 140945526 | 262629 | 7  | 13 | 0 | 0.21200206 | 0 | 13 | 1 | 0.21200206 | 0.30102999 |
| chr8 | 140945526 | 140945585 | 60     | 1  | 14 | 0 | 0.21118145 | 0 | 14 | 1 | 0.21118145 | 0.30102999 |
| chr8 | 140945585 | 141174389 | 228805 | 5  | 14 | 0 | 0.30102999 | 0 | 13 | 1 | 0.14303407 | 0.30102999 |
| chr8 | 141174389 | 141216384 | 41996  | 2  | 14 | 0 | 0.21118145 | 0 | 14 | 1 | 0.21118145 | 0.30102999 |
| chr8 | 141216384 | 141216443 | 60     | 1  | 16 | 0 | 0.4167287  | 0 | 14 | 1 | 0.08923391 | 0.30102999 |
| chr8 | 141216443 | 141285919 | 69477  | 1  | 16 | 0 | 0.55623409 | 0 | 13 | 1 | 0.05490675 | 0.30102999 |
| chr8 | 141285919 | 141301047 | 15129  | 1  | 15 | 0 | 0.41444892 | 0 | 13 | 1 | 0.09154957 | 0.30102999 |
| chr8 | 141301047 | 141301106 | 60     | 1  | 15 | 0 | 0.30102999 | 0 | 14 | 1 | 0.14135546 | 0.30102999 |
| chr8 | 141301106 | 141364555 | 63450  | 1  | 15 | 0 | 0.41444892 | 0 | 13 | 1 | 0.09154957 | 0.30102999 |
| chr8 | 141364555 | 141415716 | 51162  | 2  | 16 | 0 | 0.4167287  | 0 | 14 | 1 | 0.08923391 | 0.30102999 |
| chr8 | 141415716 | 141447774 | 32059  | 1  | 15 | 0 | 0.41444892 | 0 | 13 | 1 | 0.09154957 | 0.30102999 |
| chr8 | 141447774 | 141447833 | 60     | 1  | 15 | 0 | 0.30102999 | 0 | 14 | 1 | 0.14135546 | 0.30102999 |
| chr8 | 141447833 | 141709192 | 261360 | 6  | 15 | 0 | 0.41444892 | 0 | 13 | 1 | 0.09154957 | 0.30102999 |
| chr8 | 141709192 | 141709251 | 60     | 1  | 15 | 0 | 0.30102999 | 0 | 14 | 1 | 0.14135546 | 0.30102999 |
| chr8 | 141709251 | 141813629 | 104379 | 4  | 15 | 0 | 0.41444892 | 0 | 13 | 1 | 0.09154957 | 0.30102999 |
| chr8 | 141813629 | 141900696 | 87068  | 2  | 14 | 0 | 0.30102999 | 0 | 13 | 1 | 0.14303407 | 0.30102999 |
| chr8 | 141900696 | 141900755 | 60     | 1  | 14 | 0 | 0.21118145 | 0 | 14 | 1 | 0.21118145 | 0.30102999 |
| chr8 | 141900755 | 142080027 | 179273 | 4  | 14 | 0 | 0.30102999 | 0 | 13 | 1 | 0.14303407 | 0.30102999 |
| chr8 | 142080027 | 142270535 | 190509 | 7  | 15 | 0 | 0.30102999 | 0 | 14 | 1 | 0.14135546 | 0.30102999 |
| chr8 | 142270535 | 142308354 | 37820  | 1  | 14 | 0 | 0.21118145 | 0 | 14 | 1 | 0.21118145 | 0.30102999 |
| chr8 | 142308354 | 142390136 | 81783  | 1  | 13 | 0 | 0.14303407 | 0 | 14 | 1 | 0.30102999 | 0.30102999 |
| chr8 | 142390136 | 142390195 | 60     | 1  | 14 | 0 | 0.21118145 | 0 | 14 | 1 | 0.21118145 | 0.30102999 |
| chr8 | 142390195 | 142501148 | 110954 | 2  | 13 | 0 | 0.21200206 | 0 | 13 | 1 | 0.21200206 | 0.30102999 |
| chr8 | 142501148 | 142501207 | 60     | 1  | 14 | 0 | 0.30102999 | 0 | 13 | 1 | 0.14303407 | 0.30102999 |
| chr8 | 142501207 | 142624972 | 123766 | 2  | 13 | 0 | 0.21200206 | 0 | 13 | 1 | 0.21200206 | 0.30102999 |
| chr8 | 142624972 | 142680770 | 55799  | 2  | 14 | 0 | 0.30102999 | 0 | 13 | 1 | 0.14303407 | 0.30102999 |
| chr8 | 142680770 | 142680829 | 60     | 1  | 15 | 0 | 0.41444892 | 0 | 13 | 1 | 0.09154957 | 0.30102999 |
| chr8 | 142680829 | 142757798 | 76970  | 1  | 13 | 0 | 0.21200206 | 0 | 13 | 1 | 0.21200206 | 0.30102999 |
| chr8 | 142757798 | 142840194 | 82397  | 1  | 13 | 0 | 0.14385241 | 0 | 13 | 1 | 0.30102999 | 0.30102999 |
| chr8 | 142840194 | 142909763 | 69570  | 3  | 12 | 0 | 0.14385241 | 0 | 13 | 2 | 0.30102999 | 0.61140001 |
| chr8 | 142909763 | 143053394 | 143632 | 3  | 12 | 0 | 0.21227046 | 0 | 12 | 2 | 0.21227046 | 0.61140001 |
| chr8 | 143053394 | 143118366 | 64973  | 1  | 12 | 0 | 0.30102999 | 0 | 11 | 2 | 0.14385241 | 0.61140001 |
| chr8 | 143118366 | 143282786 | 164421 | 2  | 12 | 0 | 0.72109894 | 0 | 8  | 2 | 0.03209037 | 0.61140001 |
| chr8 | 143282786 | 143282845 | 60     | 1  | 12 | 0 | 0.41314172 | 0 | 10 | 2 | 0.09290028 | 0.61140001 |
| chr8 | 143282845 | 143371909 | 89065  | 2  | 12 | 0 | 0.72109894 | 0 | 8  | 2 | 0.03209037 | 0.61140001 |
| chr8 | 143371909 | 143371968 | 60     | 1  | 12 | 0 | 0.55190077 | 0 | 9  | 2 | 0.0565833  | 0.61140001 |
| chr8 | 143371968 | 143416464 | 44497  | 1  | 12 | 0 | 0.72109894 | 0 | 8  | 2 | 0.03209037 | 0.61140001 |
| chr8 | 143416464 |           |        |    |    |   |            |   |    |   |            |            |

|      |           |           |        |    |    |            |            |            |    |            |            |             |
|------|-----------|-----------|--------|----|----|------------|------------|------------|----|------------|------------|-------------|
| chr8 | 145493555 | 145722243 | 228689 | 13 | 20 | 1          | 1.01542894 | 0.05404976 | 15 | 2          | 0.01077081 | 0.30102999  |
| chr8 | 145722243 | 145777917 | 55675  | 3  | 19 | 1          | 1.20557689 | 0.05404976 | 13 | 2          | 0.00666883 | 0.30102999  |
| chr8 | 145777917 | 145811171 | 32355  | 1  | 18 | 1          | 0.9449689  | 0.05404976 | 13 | 2          | 0.01518174 | 0.30102999  |
| chr8 | 145811171 | 145811230 | 60     | 1  | 18 | 1          | 0.74627054 | 0.05404976 | 14 | 2          | 0.02793176 | 0.30102999  |
| chr8 | 145811230 | 145921823 | 110594 | 2  | 18 | 1          | 1.17038931 | 0.05404976 | 12 | 2          | 0.00778066 | 0.30102999  |
| chr8 | 145921823 | 145921882 | 60     | 1  | 19 | 1          | 1.46403142 | 0.05404976 | 12 | 2          | 0.00317045 | 0.30102999  |
| chr8 | 145921882 | 146005188 | 83307  | 2  | 17 | 1          | 0.92532268 | 0.05404976 | 12 | 2          | 0.01667721 | 0.30102999  |
| chr8 | 146005188 | 146015737 | 10550  | 2  | 18 | 1          | 1.17038931 | 0.05404976 | 12 | 2          | 0.00778066 | 0.30102999  |
| chr8 | 146015737 | 146121090 | 105354 | 5  | 17 | 1          | 0.92532268 | 0.05404976 | 12 | 2          | 0.01667721 | 0.30102999  |
| chr8 | 146121090 | 146157954 | 36865  | 1  | 15 | 1          | 0.71538971 | 0.05404976 | 11 | 2          | 0.0331093  | 0.30102999  |
| chr8 | 146157954 | 146174033 | 16080  | 1  | 13 | 1          | 0.41271556 | 0.05404976 | 11 | 2          | 0.09334429 | 0.30102999  |
| chr8 | 146174033 | 146280020 | 105988 | 1  | 12 | 1          | 0.30102999 | 0.05404976 | 11 | 2          | 0.14385241 | 0.30102999  |
| chr9 | 271257    | 329684    | 58428  | 2  | 0  | 0          | 0.30102999 | 0          | 1  | 2          | 0.05404976 | 0.61140001  |
| chr9 | 329684    | 329743    | 60     | 1  | 3  | 0          | 0.10122019 | 0          | 4  | 2          | 0.30102999 | 0.61140001  |
| chr9 | 329743    | 534531    | 204789 | 4  | 3  | 0          | 0.17593012 | 0          | 3  | 2          | 0.17593012 | 0.61140001  |
| chr9 | 534531    | 866584    | 332054 | 7  | 3  | 0          | 0.17593012 | 0          | 3  | 4          | 0.17593012 | 1.26272838  |
| chr9 | 866584    | 910389    | 43806  | 1  | 3  | 0          | 0.17593012 | 0          | 3  | 3          | 0.17593012 | 0.93173516  |
| chr9 | 910389    | 973803    | 63415  | 2  | 3  | 1          | 0.17593012 | 0.02438896 | 3  | 3          | 0.17593012 | 0.51676182  |
| chr9 | 973803    | 973862    | 60     | 1  | 3  | 1          | 0.17593012 | 0.01091641 | 3  | 4          | 0.17593012 | 0.76005302  |
| chr9 | 973862    | 1079463   | 105602 | 2  | 3  | 1          | 0.17593012 | 0.05404976 | 3  | 2          | 0.17593012 | 0.30102999  |
| chr9 | 1079463   | 1079522   | 60     | 1  | 60 | 1          | 0.17593012 | 0.00478973 | 3  | 5          | 0.17593012 | 0.102643191 |
| chr9 | 1079522   | 1178939   | 99418  | 1  | 3  | 0          | 0.17593012 | 0.01091641 | 3  | 4          | 0.17593012 | 0.76005302  |
| chr9 | 1178939   | 1288054   | 109116 | 1  | 3  | 0          | 0.17593012 | 0          | 3  | 4          | 0.17593012 | 1.26272838  |
| chr9 | 1288054   | 1288113   | 60     | 1  | 4  | 0          | 0.30102999 | 0          | 3  | 5          | 0.10122019 | 1.60515106  |
| chr9 | 1288113   | 1411750   | 123638 | 2  | 4  | 0          | 0.30102999 | 0          | 3  | 4          | 0.10122019 | 1.26272838  |
| chr9 | 1411750   | 1511200   | 99451  | 2  | 4  | 0          | 0.18734596 | 0          | 4  | 4          | 0.18734596 | 1.26272838  |
| chr9 | 1511200   | 1511259   | 60     | 1  | 4  | 1          | 0.18734596 | 0.01091641 | 4  | 4          | 0.18734596 | 0.76005302  |
| chr9 | 1511259   | 1579408   | 68150  | 1  | 1  | 0.30102999 | 0.01091641 | 3          | 4  | 0.10122019 | 0.76005302 |             |
| chr9 | 1579408   | 1579467   | 60     | 1  | 4  | 1          | 0.30102999 | 0.00478973 | 3  | 5          | 0.10122019 | 1.02643191  |
| chr9 | 1579467   | 1665294   | 85828  | 1  | 4  | 0          | 0.30102999 | 0          | 3  | 4          | 0.10122019 | 1.26272838  |
| chr9 | 1665294   | 1803603   | 138310 | 2  | 3  | 0          | 0.30102999 | 0          | 2  | 4          | 0.08289318 | 1.26272838  |
| chr9 | 1803603   | 1869792   | 66190  | 2  | 3  | 1          | 0.30102999 | 0.00478973 | 2  | 5          | 0.08289318 | 1.02643191  |
| chr9 | 1869792   | 1869851   | 60     | 1  | 3  | 1          | 0.30102999 | 0.00204627 | 2  | 6          | 0.08289318 | 1.31360226  |
| chr9 | 1869851   | 1950345   | 80495  | 1  | 3  | 1          | 0.30102999 | 0.00478973 | 2  | 5          | 0.08289318 | 1.02643191  |
| chr9 | 1950345   | 2141771   | 191427 | 3  | 3  | 1          | 0.30102999 | 0.01091641 | 2  | 4          | 0.08289318 | 0.76005302  |
| chr9 | 2141771   | 2267812   | 126042 | 3  | 3  | 1          | 0.30102999 | 0.00478973 | 2  | 5          | 0.08289318 | 1.02643191  |
| chr9 | 2267812   | 2267871   | 60     | 1  | 3  | 1          | 0.17593012 | 0.00204627 | 3  | 6          | 0.17593012 | 1.31360226  |
| chr9 | 2267871   | 2385395   | 117525 | 1  | 3  | 1          | 0.30102999 | 0.00204627 | 2  | 6          | 0.08289318 | 1.31360226  |
| chr9 | 2385395   | 2385454   | 60     | 1  | 3  | 1          | 0.30102999 | 8.47E-04   | 7  | 7          | 0.08289318 | 1.62048027  |
| chr9 | 2385454   | 2494816   | 109363 | 1  | 3  | 1          | 0.30102999 | 0.00204627 | 2  | 6          | 0.08289318 | 1.31360226  |
| chr9 | 2494816   | 2494875   | 60     | 1  | 4  | 1          | 0.47744371 | 0.00204627 | 2  | 6          | 0.0429175  | 1.31360226  |
| chr9 | 2494875   | 2737667   | 242793 | 4  | 3  | 1          | 0.30102999 | 0.00204627 | 2  | 6          | 0.08289318 | 1.31360226  |
| chr9 | 2737667   | 2805577   | 67911  | 1  | 3  | 1          | 0.30102999 | 0.00478973 | 2  | 5          | 0.08289318 | 1.02643191  |
| chr9 | 2805577   | 2876716   | 71140  | 2  | 3  | 1          | 0.30102999 | 0.02162467 | 2  | 5          | 0.08289318 | 0.68214471  |
| chr9 | 2876716   | 3168699   | 291984 | 5  | 3  | 0          | 0.30102999 | 0          | 2  | 5          | 0.08289318 | 1.60515106  |
| chr9 | 3168699   | 3323081   | 154383 | 4  | 3  | 1          | 0.30102999 | 0.00204627 | 2  | 6          | 0.08289318 | 1.31360226  |
| chr9 | 3323081   | 3519377   | 196297 | 4  | 3  | 1          | 0.30102999 | 0.00478973 | 5  | 5          | 0.08289318 | 1.02643191  |
| chr9 | 3519377   | 3754972   | 235596 | 4  | 3  | 2          | 0.30102999 | 0.02162467 | 2  | 5          | 0.08289318 | 0.68214471  |
| chr9 | 3754972   | 3755031   | 60     | 1  | 3  | 2          | 0.17593012 | 0.02162467 | 3  | 5          | 0.17593012 | 0.68214471  |
| chr9 | 3755031   | 3896743   | 141713 | 2  | 3  | 1          | 0.17593012 | 0.01091641 | 3  | 4          | 0.17593012 | 0.76005302  |
| chr9 | 3896743   | 3896802   | 60     | 1  | 4  | 1          | 0.30102999 | 0.00478973 | 5  | 5          | 0.10122019 | 1.02643191  |
| chr9 | 3896802   | 3972272   | 75471  | 2  | 3  | 1          | 0.17593012 | 0.02438896 | 3  | 3          | 0.17593012 | 0.51676182  |
| chr9 | 3972272   | 3972331   | 60     | 1  | 4  | 1          | 0.30102999 | 0.02438896 | 3  | 3          | 0.10122019 | 0.51676182  |
| chr9 | 3972331   | 4051530   | 79200  | 1  | 3  | 1          | 0.17593012 | 0.05404976 | 3  | 2          | 0.17593012 | 0.30102999  |
| chr9 | 4051530   | 4116616   | 65087  | 1  | 3  | 1          | 0.17593012 | 0.1218695  | 3  | 1          | 0.17593012 | 0.1218695   |
| chr9 | 4116616   | 4156589   | 39974  | 2  | 3  | 1          | 0.10122019 | 0.02438896 | 4  | 3          | 0.30102999 | 0.51676182  |
| chr9 | 4156589   | 4156648   | 60     | 1  | 3  | 1          | 0.10122019 | 0.01091641 | 4  | 4          | 0.30102999 | 0.76005302  |
| chr9 | 4156648   | 4210276   | 53629  | 1  | 3  | 1          | 0.17593012 | 0.01091641 | 3  | 4          | 0.17593012 | 0.76005302  |
| chr9 | 4210276   | 4210335   | 60     | 1  | 3  | 2          | 0.10122019 | 0.0429175  | 4  | 4          | 0.30102999 | 0.47744371  |
| chr9 | 4210335   | 4277620   | 67286  | 1  | 3  | 1          | 0.10122019 | 0.02438896 | 4  | 3          | 0.30102999 | 0.51676182  |
| chr9 | 4277620   | 4357696   | 80077  | 1  | 3  | 1          | 0.17593012 | 0.05404976 | 3  | 2          | 0.17593012 | 0.30102999  |
| chr9 | 4357696   | 4428574   | 70879  | 1  | 3  | 0          | 0.17593012 | 0          | 3  | 2          | 0.17593012 | 0.61140001  |
| chr9 | 4428574   | 4516059   | 87486  | 3  | 4  | 0          | 0.18734596 | 0          | 4  | 2          | 0.18734596 | 0.61140001  |
| chr9 | 4516059   | 4970093   | 454035 | 9  | 4  | 0          | 0.18734596 | 0          | 4  | 1          | 0.18734596 | 0.30102999  |
| chr9 | 4970093   | 5132181   | 162089 | 5  | 4  | 1          | 0.18734596 | 0.02438896 | 4  | 3          | 0.18734596 | 0.51676182  |
| chr9 | 5132181   | 5291649   | 159469 | 4  | 1  | 1          | 0.18734596 | 0.05404976 | 2  | 4          | 0.18734596 | 0.30102999  |
| chr9 | 5291649   | 5291708   | 60     | 1  | 4  | 2          | 0.18734596 | 0.08289318 | 1  | 4          | 0.18734596 | 0.30102999  |
| chr9 | 5291708   | 5420471   | 128764 | 2  | 4  | 2          | 0.30102999 | 0.08289318 | 3  | 3          | 0.10122019 | 0.30102999  |
| chr9 | 5420471   | 5485609   | 65139  | 1  | 4  | 2          | 0.47744371 | 0.08289318 | 2  | 3          | 0.0429175  | 0.30102999  |
| chr9 | 5485609   | 5558534   | 79256  | 2  | 4  | 2          | 0.30102999 | 0.0429175  | 3  | 4          | 0.10122019 | 0.47744371  |
| chr9 | 5558534   | 5558593   | 60     | 1  | 4  | 2          | 0.18734596 | 0.0429175  | 4  | 4          | 0.18734596 | 0.47744371  |
| chr9 | 5558593   | 5615590   | 56998  | 1  | 4  | 2          | 0.30102999 | 0.0429175  | 3  | 4          | 0.10122019 | 0.47744371  |
| chr9 | 5615590   | 5775569   | 159980 | 2  | 4  | 1          | 0.30102999 | 0.01091641 | 3  | 4          | 0.10122019 | 0.76005302  |
| chr9 | 5775569   | 5827172   | 51604  | 2  | 5  | 2          | 0.45545077 | 0.0429175  | 3  | 4          | 0.05670724 | 0.47744371  |
| chr9 | 5827172   | 5947662   | 120491 | 2  | 4  | 2          | 0.30102999 | 0.0429175  | 3  | 4          | 0.10122019 | 0.47744371  |
| chr9 | 5947662   | 5947721   | 60     | 1  | 5  | 2          | 0.45545077 | 0.0429175  | 3  | 4          | 0.05670724 | 0.47744371  |
| chr9 | 5947721   | 6198539   | 250819 | 3  | 4  | 2          | 0.47744371 | 0.0429175  | 2  | 4          | 0.0429175  | 0.47744371  |
| chr9 | 6198539   | 6198598   | 60     | 1  | 5  | 2          | 0.68214471 | 0.0429175  | 2  | 4          | 0.02162467 | 0.47744371  |
| chr9 | 6198598   | 6330667   | 132070 | 3  | 4  | 2          | 0.47744371 | 0.0429175  | 2  | 4          | 0.0429175  | 0.47744371  |
| chr9 | 6330667   | 6330726   | 60     | 1  | 4  | 2          | 0.47744371 | 0.02162467 | 5  | 5          | 0.0429175  | 0.68214471  |
| chr9 | 6330726   | 6715000   | 384275 | 7  | 3  | 2          | 0.30102999 | 0.0429175  | 2  | 4          | 0.08289318 | 0.47744371  |
| chr9 | 6715000   | 6763489   | 48490  | 1  | 3  | 2          | 0.30102999 | 0.08289318 | 3  | 3          | 0.08289318 | 0.30102999  |
| chr9 | 6763489   | 6813496   | 50008  | 1  | 3  | 2          | 0.30102999 | 0.1575501  | 2  | 2          | 0.08289318 | 0.1575501   |
| chr9 | 6813496   | 6884557   | 71062  | 2  | 4  | 2          | 0.47744371 | 0.08289318 | 3  | 4          | 0.0429175  | 0.30102999  |
| chr9 | 6884557   | 7047206   | 162650 | 3  | 2  | 2          | 0.30102999 | 0.08289318 | 2  | 3          | 0.08289318 | 0.30102999  |
| chr9 | 7047206   | 7202935   | 155730 | 3  | 3  | 2          | 0.30102999 | 0.1575501  | 2  | 2          | 0.08289318 | 0.1575501   |
| chr9 | 7202935   | 7341462   | 138528 | 1  | 3  | 2          | 0.30102999 | 0.05404976 | 2  | 2          | 0.08289318 | 0.30102999  |
| chr9 | 7341462   | 7493625   | 152164 | 2  | 4  | 1          | 0.47744371 | 0.05404976 | 2  | 2          | 0.0429175  | 0.30102999  |
| chr9 | 7493625   | 7493684   | 60     | 1  | 4  | 1          | 0.30102999 | 0.05404976 | 3  | 2          | 0.10122019 | 0.30102999  |
| chr9 | 7493684   | 7608025   | 114342 | 1  | 3  | 1          | 0.30102999 | 0.05404976 | 2  | 2          | 0.08289318 | 0.30102999  |
| chr9 | 7608025   | 7608084   | 60     | 1  | 3  | 2          | 0.30102999 | 0.1575501  | 2  | 2          | 0.08289318 | 0.1575501   |
| chr9 | 7608084   | 7935806   | 327723 | 3  | 2  | 2          | 0.51676182 | 0.1575501  | 1  | 2          | 0.02438896 |             |

|      |          |          |        |   |   |   |            |            |   |   |            |            |
|------|----------|----------|--------|---|---|---|------------|------------|---|---|------------|------------|
| chr9 | 11818291 | 11818350 | 60     | 1 | 1 | 1 | 0.1218695  | 0.02438896 | 1 | 3 | 0.1218695  | 0.51676182 |
| chr9 | 11818350 | 12196201 | 377852 | 3 | 1 | 1 | 0.30102999 | 0.02438896 | 0 | 3 | 0          | 0.51676182 |
| chr9 | 12196201 | 12275118 | 78918  | 1 | 1 | 1 | 0.30102999 | 0.05404976 | 0 | 2 | 0          | 0.30102999 |
| chr9 | 12275118 | 12275177 | 60     | 1 | 2 | 2 | 0.30102999 | 0.08289318 | 1 | 3 | 0.05404976 | 0.30102999 |
| chr9 | 12275177 | 12405964 | 130788 | 1 | 1 | 1 | 0.30102999 | 0.02438896 | 1 | 3 | 0.05404976 | 0.51676182 |
| chr9 | 12405964 | 12406020 | 57     | 1 | 2 | 1 | 0.1575501  | 0.01091641 | 2 | 4 | 0.1575501  | 0.76005302 |
| chr9 | 12406020 | 12698598 | 292579 | 4 | 2 | 1 | 0.30102999 | 0.02438896 | 1 | 3 | 0.05404976 | 0.51676182 |
| chr9 | 12698598 | 13003652 | 305055 | 4 | 2 | 1 | 0.61140001 | 0.05404976 | 0 | 2 | 0          | 0.30102999 |
| chr9 | 13003652 | 13003711 | 60     | 1 | 2 | 1 | 0.61140001 | 0.02438896 | 0 | 3 | 0          | 0.51676182 |
| chr9 | 13003711 | 13106806 | 103096 | 1 | 2 | 1 | 0.61140001 | 0.05404976 | 0 | 2 | 0          | 0.30102999 |
| chr9 | 13106806 | 13136195 | 29390  | 3 | 2 | 1 | 0.30102999 | 0.02438896 | 1 | 3 | 0.05404976 | 0.51676182 |
| chr9 | 13136195 | 13183475 | 47281  | 1 | 2 | 1 | 0.30102999 | 0.05404976 | 1 | 2 | 0.05404976 | 0.30102999 |
| chr9 | 13183475 | 13217213 | 33739  | 2 | 2 | 1 | 0.30102999 | 0.02438896 | 1 | 3 | 0.05404976 | 0.51676182 |
| chr9 | 13217213 | 13275993 | 58781  | 3 | 2 | 1 | 0.30102999 | 0.01091641 | 1 | 4 | 0.05404976 | 0.76005302 |
| chr9 | 13275993 | 13374245 | 98253  | 2 | 2 | 2 | 0.30102999 | 0.0429175  | 1 | 4 | 0.05404976 | 0.47744371 |
| chr9 | 13374245 | 13595855 | 221611 | 3 | 2 | 2 | 0.1575501  | 0.0429175  | 2 | 4 | 0.1575501  | 0.47744371 |
| chr9 | 13595855 | 13595914 | 60     | 1 | 3 | 2 | 0.30102999 | 0.0429175  | 2 | 4 | 0.08289318 | 0.47744371 |
| chr9 | 13595914 | 13752900 | 156987 | 1 | 3 | 2 | 0.30102999 | 0.08289318 | 2 | 3 | 0.08289318 | 0.30102999 |
| chr9 | 13752900 | 13752959 | 60     | 1 | 3 | 2 | 0.30102999 | 0.0429175  | 2 | 4 | 0.08289318 | 0.47744371 |
| chr9 | 13752959 | 13877280 | 124322 | 1 | 3 | 2 | 0.30102999 | 0.1575501  | 2 | 2 | 0.08289318 | 0.1575501  |
| chr9 | 13877280 | 13877339 | 60     | 1 | 3 | 2 | 0.17593012 | 0.08289318 | 3 | 3 | 0.17593012 | 0.30102999 |
| chr9 | 13877339 | 13959104 | 81766  | 1 | 3 | 1 | 0.17593012 | 0.02438896 | 1 | 3 | 0.17593012 | 0.51676182 |
| chr9 | 13959104 | 13959163 | 60     | 1 | 4 | 1 | 0.18734596 | 0.00478973 | 4 | 5 | 0.18734596 | 1.02643191 |
| chr9 | 13959163 | 14087982 | 128820 | 2 | 4 | 1 | 0.18734596 | 0.02438896 | 1 | 4 | 0.18734596 | 0.51676182 |
| chr9 | 14087982 | 14088041 | 60     | 1 | 6 | 1 | 0.20064824 | 0.01091641 | 1 | 6 | 0.20064824 | 0.76005302 |
| chr9 | 14088041 | 14179792 | 91752  | 2 | 4 | 1 | 0.11390336 | 0.02438896 | 5 | 3 | 0.30102999 | 0.51676182 |
| chr9 | 14179792 | 14210863 | 31072  | 1 | 4 | 1 | 0.18734596 | 0.02438896 | 4 | 3 | 0.18734596 | 0.51676182 |
| chr9 | 14210863 | 14270425 | 59563  | 1 | 3 | 1 | 0.17593012 | 0.02438896 | 3 | 3 | 0.17593012 | 0.51676182 |
| chr9 | 14270425 | 14360221 | 89797  | 3 | 4 | 1 | 0.30102999 | 0.01091641 | 4 | 4 | 0.10122019 | 0.76005302 |
| chr9 | 14360221 | 14397186 | 36966  | 1 | 3 | 1 | 0.17593012 | 0.01091641 | 3 | 4 | 0.17593012 | 0.76005302 |
| chr9 | 14397186 | 14506695 | 109510 | 2 | 3 | 2 | 0.17593012 | 0.0429175  | 3 | 4 | 0.17593012 | 0.47744371 |
| chr9 | 14506695 | 14542140 | 35446  | 2 | 4 | 4 | 0.30102999 | 0.18734596 | 3 | 4 | 0.10122019 | 0.18734596 |
| chr9 | 14542140 | 14610351 | 68212  | 1 | 3 | 3 | 0.17593012 | 0.10122019 | 3 | 4 | 0.17593012 | 0.30102999 |
| chr9 | 14610351 | 14639912 | 29562  | 2 | 3 | 3 | 0.17593012 | 0.05670724 | 3 | 5 | 0.17593012 | 0.45545077 |
| chr9 | 14639912 | 14680180 | 40269  | 2 | 3 | 4 | 0.10122019 | 0.06713722 | 4 | 6 | 0.30102999 | 0.44141547 |
| chr9 | 14680180 | 14720392 | 40213  | 1 | 3 | 4 | 0.17593012 | 0.06713722 | 3 | 6 | 0.17593012 | 0.44141547 |
| chr9 | 14720392 | 14887042 | 166651 | 4 | 3 | 3 | 0.17593012 | 0.03070643 | 3 | 6 | 0.17593012 | 0.63695542 |
| chr9 | 14887042 | 14887101 | 60     | 1 | 3 | 3 | 0.10122019 | 0.03070643 | 4 | 6 | 0.30102999 | 0.63695542 |
| chr9 | 14887101 | 14956477 | 69377  | 1 | 3 | 2 | 0.10122019 | 0.01053319 | 4 | 6 | 0.30102999 | 0.91219088 |
| chr9 | 14956477 | 15040963 | 84487  | 1 | 3 | 1 | 0.17593012 | 0.00204627 | 3 | 6 | 0.17593012 | 1.31360226 |
| chr9 | 15040963 | 15104458 | 63496  | 2 | 3 | 1 | 0.10122019 | 0.00204627 | 4 | 6 | 0.30102999 | 1.31360226 |
| chr9 | 15104458 | 15185751 | 81294  | 3 | 3 | 1 | 0.30102999 | 0.00478973 | 2 | 5 | 0.08289318 | 1.02643191 |
| chr9 | 15185751 | 15267912 | 82162  | 2 | 3 | 1 | 0.30102999 | 0.02438896 | 2 | 3 | 0.08289318 | 0.51676182 |
| chr9 | 15267912 | 15267965 | 54     | 1 | 3 | 1 | 0.30102999 | 0.00478973 | 2 | 5 | 0.08289318 | 1.02643191 |
| chr9 | 15267965 | 15305901 | 37937  | 1 | 3 | 1 | 0.51676182 | 0.01091641 | 1 | 4 | 0.02438896 | 0.76005302 |
| chr9 | 15305901 | 15378135 | 72235  | 1 | 3 | 1 | 0.51676182 | 0.02438896 | 1 | 3 | 0.02438896 | 0.51676182 |
| chr9 | 15378135 | 15378194 | 60     | 1 | 3 | 2 | 0.51676182 | 0.02162467 | 1 | 5 | 0.02438896 | 0.68214471 |
| chr9 | 15378194 | 15433811 | 55618  | 1 | 2 | 2 | 0.51676182 | 0.0429175  | 1 | 4 | 0.02438896 | 0.47744371 |
| chr9 | 15433811 | 15433870 | 60     | 1 | 3 | 2 | 0.51676182 | 0.02162467 | 1 | 5 | 0.02438896 | 0.68214471 |
| chr9 | 15433870 | 15482839 | 48970  | 2 | 2 | 2 | 0.51676182 | 0.0429175  | 1 | 4 | 0.02438896 | 0.47744371 |
| chr9 | 15482839 | 15482898 | 60     | 1 | 3 | 2 | 0.30102999 | 0.02162467 | 2 | 5 | 0.08289318 | 0.68214471 |
| chr9 | 15482898 | 15549731 | 66834  | 1 | 3 | 2 | 0.51676182 | 0.02162467 | 1 | 5 | 0.02438896 | 0.68214471 |
| chr9 | 15549731 | 15624173 | 74443  | 3 | 2 | 2 | 0.30102999 | 0.02162467 | 2 | 5 | 0.08289318 | 0.68214471 |
| chr9 | 15624173 | 16124090 | 499918 | 9 | 3 | 2 | 0.51676182 | 0.02162467 | 1 | 5 | 0.02438896 | 0.68214471 |
| chr9 | 16124090 | 16307883 | 183794 | 3 | 3 | 1 | 0.93173516 | 0.02438896 | 0 | 3 | 0          | 0.51676182 |
| chr9 | 16307883 | 16418754 | 110872 | 2 | 3 | 1 | 0.51676182 | 0.02438896 | 1 | 3 | 0.02438896 | 0.51676182 |
| chr9 | 16418754 | 16434825 | 16072  | 2 | 3 | 1 | 0.30102999 | 0.02438896 | 2 | 3 | 0.08289318 | 0.51676182 |
| chr9 | 16434825 | 16434884 | 60     | 1 | 3 | 1 | 0.30102999 | 0.01091641 | 2 | 4 | 0.08289318 | 0.76005302 |
| chr9 | 16434884 | 16526550 | 91667  | 2 | 3 | 1 | 0.30102999 | 0.02438896 | 2 | 3 | 0.08289318 | 0.51676182 |
| chr9 | 16526550 | 16527656 | 1107   | 2 | 3 | 1 | 0.30102999 | 0.01091641 | 2 | 4 | 0.08289318 | 0.76005302 |
| chr9 | 16527656 | 16593358 | 65703  | 1 | 3 | 1 | 0.51676182 | 0.02438896 | 1 | 3 | 0.02438896 | 0.51676182 |
| chr9 | 16593358 | 16705259 | 111902 | 4 | 4 | 1 | 0.76005302 | 0.02438896 | 1 | 3 | 0.01091641 | 0.51676182 |
| chr9 | 16705259 | 17020094 | 314836 | 4 | 2 | 1 | 0.30102999 | 0.05404976 | 2 | 2 | 0.05404976 | 0.30102999 |
| chr9 | 17020094 | 17076538 | 56445  | 2 | 2 | 1 | 0.1575501  | 0.05404976 | 2 | 2 | 0.1575501  | 0.30102999 |
| chr9 | 17076538 | 17195765 | 119228 | 2 | 1 | 1 | 0.30102999 | 0.05404976 | 2 | 2 | 0.05404976 | 0.30102999 |
| chr9 | 17195765 | 17288824 | 60     | 1 | 2 | 1 | 0.30102999 | 0.02438896 | 1 | 3 | 0.05404976 | 0.51676182 |
| chr9 | 17288824 | 17388504 | 103027 | 2 | 2 | 1 | 0.61140001 | 0.05404976 | 0 | 0 | 0          | 0.30102999 |
| chr9 | 17388504 | 17342315 | 43466  | 2 | 2 | 1 | 0.61140001 | 0.02438896 | 0 | 0 | 0          | 0.51676182 |
| chr9 | 17342315 | 17386482 | 44168  | 1 | 2 | 1 | 0.61140001 | 0.01091641 | 4 | 4 | 0          | 0.76005302 |
| chr9 | 17386482 | 17466848 | 80367  | 1 | 1 | 1 | 0.30102999 | 0.01091641 | 1 | 4 | 0          | 0.76005302 |
| chr9 | 17466848 | 17502885 | 36038  | 2 | 1 | 1 | 0.30102999 | 0.0429175  | 0 | 4 | 0          | 0.47744371 |
| chr9 | 17502885 | 17502944 | 60     | 1 | 2 | 2 | 0.61140001 | 0.0429175  | 0 | 4 | 0          | 0.47744371 |
| chr9 | 17502944 | 17578717 | 75774  | 1 | 2 | 2 | 0.61140001 | 0.08289318 | 0 | 3 | 0          | 0.30102999 |
| chr9 | 17578717 | 17630872 | 52156  | 1 | 1 | 2 | 0.30102999 | 0.08289318 | 0 | 3 | 0          | 0.30102999 |
| chr9 | 17630872 | 17675345 | 44474  | 2 | 1 | 2 | 0.30102999 | 0.0429175  | 0 | 4 | 0          | 0.47744371 |
| chr9 | 17675345 | 17709124 | 33780  | 2 | 2 | 2 | 0.61140001 | 0.0429175  | 0 | 4 | 0          | 0.47744371 |
| chr9 | 17709124 | 17796728 | 87605  | 2 | 2 | 2 | 0.61140001 | 0.08289318 | 0 | 3 | 0          | 0.30102999 |
| chr9 | 17796728 | 17851059 | 54332  | 1 | 2 | 1 | 0.61140001 | 0.02438896 | 0 | 3 | 0          | 0.51676182 |
| chr9 | 17851059 | 17985541 | 134483 | 2 | 2 | 1 | 0.30102999 | 0.02438896 | 1 | 3 | 0.05404976 | 0.51676182 |
| chr9 | 17985541 | 17985600 | 60     | 1 | 2 | 1 | 0.08289318 | 0.02438896 | 3 | 3 | 0.30102999 | 0.51676182 |
| chr9 | 17985600 | 18186747 | 201148 | 1 | 2 | 1 | 0.1575501  | 0.02438896 | 2 | 3 | 0.1575501  | 0.51676182 |
| chr9 | 18186747 | 18186806 | 60     | 1 | 2 | 1 | 0.08289318 | 0.01091641 | 3 | 4 | 0.30102999 | 0.76005302 |
| chr9 | 18186806 | 18288868 | 102063 | 1 | 2 | 1 | 0.1575501  | 0.01091641 | 2 | 4 | 0.1575501  | 0.76005302 |
| chr9 | 18288868 | 18398255 | 109388 | 2 | 1 | 1 | 0.30102999 | 0.02438896 | 1 | 3 | 0.05404976 | 0.51676182 |
| chr9 | 18398255 | 18474451 | 76197  | 1 | 2 | 1 | 0.30102999 | 0.01091641 | 1 | 4 | 0.05404976 | 0.76005302 |
| chr9 | 18474451 | 18533248 | 58798  | 2 | 2 | 1 | 0.30102999 | 0.00478973 | 1 | 5 | 0.05404976 | 1.02643191 |
| chr9 | 18533248 | 18574273 | 41026  | 2 | 1 | 4 | 0.0429175  | 0.00478973 | 4 | 5 | 0.47744371 | 1.02643191 |
| chr9 | 18574273 | 18639234 | 64962  | 2 | 1 | 1 | 0.08289318 | 0.00478973 | 3 | 5 | 0.30102999 | 1.02643191 |
| chr9 | 18639234 | 18681089 | 41856  | 2 | 1 | 1 | 0.0429175  | 0.00478973 | 4 | 5 | 0.47744371 | 1.02643191 |
| chr9 | 18681089 | 18743296 | 62208  | 1 | 1 | 1 | 0.1575501  | 0.00478973 | 2 | 5 | 0.1575501  | 1.02643191 |
| chr9 | 18743296 | 18892980 | 149685 | 3 | 1 | 2 | 0.05404976 | 0.00478973 | 2 | 5 | 0.30102999 | 1.02643191 |
| chr9 | 188      |          |        |   |   |   |            |            |   |   |            |            |



|      |          |          |          |   |   |            |            |            |   |            |            |            |
|------|----------|----------|----------|---|---|------------|------------|------------|---|------------|------------|------------|
| chr9 | 21583983 | 21678040 | 94058    | 2 | 1 | 6          | 0.00204627 | 0.129913   | 6 | 7          | 1.31360226 | 0.30102999 |
| chr9 | 21678040 | 21678099 | 60       | 1 | 1 | 6          | 0.00204627 | 0.08122616 | 6 | 8          | 1.31360226 | 0.4250187  |
| chr9 | 21678099 | 21743410 | 65312    | 1 | 0 | 6          | 0          | 0.08122616 | 6 | 8          | 1.95986592 | 0.4250187  |
| chr9 | 21743410 | 21743469 | 60       | 1 | 0 | 7          | 0          | 0.13499366 | 6 | 8          | 1.95986592 | 0.30102999 |
| chr9 | 21743469 | 21805329 | 61861    | 1 | 0 | 6          | 0          | 0.08122616 | 6 | 8          | 1.95986592 | 0.4250187  |
| chr9 | 21805329 | 21905380 | 100052   | 3 | 0 | 6          | 0          | 0.129913   | 6 | 7          | 1.95986592 | 0.30102999 |
| chr9 | 21905380 | 21905439 | 60       | 1 | 0 | 6          | 0          | 0.08122616 | 6 | 8          | 1.95986592 | 0.4250187  |
| chr9 | 21905439 | 22009029 | 103511   | 8 | 0 | 5          | 0          | 0.07511598 | 6 | 7          | 1.95986592 | 0.43181735 |
| chr9 | 22009029 | 22241139 | 232111   | 2 | 0 | 4          | 0          | 0.03812622 | 6 | 7          | 1.95986592 | 0.60763643 |
| chr9 | 22241139 | 22326224 | 85086    | 1 | 0 | 4          | 0          | 0.03812622 | 4 | 7          | 1.26272838 | 0.60763643 |
| chr9 | 22326224 | 22416608 | 90385    | 1 | 0 | 4          | 0          | 0.05670724 | 2 | 5          | 0.61140001 | 0.45545077 |
| chr9 | 22416608 | 22519885 | 103278   | 1 | 0 | 1          | 0          | 0.00478973 | 2 | 5          | 0.61140001 | 1.02643191 |
| chr9 | 22519885 | 22519944 | 60       | 1 | 0 | 1          | 8.47E-04   | 1          | 3 | 7          | 0.93173516 | 1.62048027 |
| chr9 | 22519944 | 22648510 | 128567   | 1 | 0 | 1          | 0          | 0.00478973 | 2 | 5          | 0.61140001 | 1.02643191 |
| chr9 | 22648510 | 22700103 | 51594    | 1 | 0 | 1          | 0          | 0.01091641 | 2 | 4          | 0.61140001 | 0.76005302 |
| chr9 | 22700103 | 22700162 | 60       | 1 | 0 | 2          | 0          | 0.01053319 | 2 | 6          | 0.61140001 | 0.91219088 |
| chr9 | 22700162 | 22765222 | 65061    | 1 | 0 | 1          | 0          | 0.00204627 | 2 | 6          | 0.61140001 | 1.31360226 |
| chr9 | 22765222 | 22899584 | 134363   | 2 | 0 | 2          | 0          | 0.01053319 | 2 | 6          | 0.61140001 | 0.91219088 |
| chr9 | 22899584 | 23002377 | 102794   | 2 | 0 | 4          | 0          | 0.06713722 | 2 | 6          | 0.61140001 | 0.44141547 |
| chr9 | 23002377 | 23398116 | 595740   | 4 | 0 | 3          | 0          | 0.05670724 | 1 | 5          | 0.30102999 | 0.45545077 |
| chr9 | 23398116 | 23598175 | 23598175 | 4 | 0 | 4          | 0          | 0.11390336 | 1 | 5          | 0.30102999 | 0.30102999 |
| chr9 | 23598175 | 23690332 | 92158    | 2 | 0 | 2          | 0          | 0.0429175  | 4 | 4          | 0.30102999 | 0.47744371 |
| chr9 | 23690332 | 23789157 | 98826    | 3 | 0 | 1          | 0          | 0.01091641 | 1 | 1          | 0.30102999 | 0.76005302 |
| chr9 | 23789157 | 23933357 | 144201   | 4 | 0 | 1          | 0          | 0.00478973 | 1 | 5          | 0.30102999 | 1.02643191 |
| chr9 | 23933357 | 24146307 | 212951   | 2 | 0 | 1          | 0          | 0.01091641 | 1 | 4          | 0.30102999 | 0.76005302 |
| chr9 | 24146307 | 24146366 | 60       | 1 | 0 | 2          | 0          | 0.0429175  | 1 | 4          | 0.30102999 | 0.47744371 |
| chr9 | 24146366 | 24694811 | 548446   | 3 | 0 | 1          | 0          | 0.05404976 | 1 | 2          | 0.30102999 | 0.30102999 |
| chr9 | 24694811 | 24837887 | 143077   | 1 | 0 | 1          | 0          | 0.1218695  | 1 | 1          | 0.30102999 | 0.1218695  |
| chr9 | 24837887 | 24942407 | 104521   | 2 | 0 | 1          | 0          | 0.30102999 | 1 | 0          | 0.30102999 | 0          |
| chr9 | 24942407 | 25205505 | 263099   | 2 | 0 | 0          | 0          | 0          | 0 | 1          | 0.30102999 | 0          |
| chr9 | 25205505 | 25738780 | 533276   | 4 | 0 | 1          | 0          | 0.1218695  | 1 | 1          | 0.30102999 | 0.1218695  |
| chr9 | 25738780 | 25738839 | 60       | 1 | 0 | 2          | 0          | 0.30102999 | 1 | 1          | 0.30102999 | 0.05404976 |
| chr9 | 25738839 | 26023775 | 284937   | 2 | 0 | 0          | 0          | 0          | 1 | 1          | 0.30102999 | 0.30102999 |
| chr9 | 26023775 | 26096341 | 72567    | 2 | 0 | 0          | 0          | 0          | 2 | 5          | 0.61140001 | 1.60515106 |
| chr9 | 26096341 | 26321885 | 225545   | 3 | 0 | 1          | 0          | 0.00478973 | 2 | 5          | 0.61140001 | 1.02643191 |
| chr9 | 26321885 | 26321944 | 60       | 1 | 0 | 3          | 0          | 0.05670724 | 2 | 5          | 0.61140001 | 0.45545077 |
| chr9 | 26321944 | 26464989 | 143046   | 1 | 0 | 2          | 0          | 0.02162467 | 2 | 5          | 0.61140001 | 0.68214471 |
| chr9 | 26464989 | 26999600 | 534612   | 1 | 4 | 0.05404976 | 0.06713722 | 2          | 6 | 0.30102999 | 0.44141547 |            |
| chr9 | 26999600 | 27029070 | 29471    | 2 | 1 | 4          | 0.05404976 | 0.03812622 | 2 | 7          | 0.30102999 | 0.60763643 |
| chr9 | 27029070 | 27230105 | 201036   | 6 | 1 | 5          | 0.05404976 | 0.04407651 | 2 | 8          | 0.30102999 | 0.58747015 |
| chr9 | 27230105 | 27263898 | 33794    | 2 | 1 | 6          | 0.05404976 | 0.08122616 | 2 | 8          | 0.30102999 | 0.4250187  |
| chr9 | 27263898 | 27374468 | 110571   | 2 | 1 | 5          | 0.05404976 | 0.04407651 | 2 | 8          | 0.30102999 | 0.58747015 |
| chr9 | 27374468 | 27415871 | 41404    | 2 | 1 | 7          | 0.05404976 | 0.13499366 | 2 | 8          | 0.30102999 | 0.30102999 |
| chr9 | 27415871 | 27455716 | 39846    | 1 | 1 | 6          | 0.05404976 | 0.08122616 | 2 | 8          | 0.30102999 | 0.4250187  |
| chr9 | 27455716 | 27487943 | 32228    | 2 | 1 | 6          | 0.02438996 | 0.08122616 | 3 | 8          | 0.51676182 | 0.4250187  |
| chr9 | 27487943 | 27524323 | 36381    | 1 | 1 | 5          | 0.02438996 | 0.04407651 | 3 | 8          | 0.51676182 | 0.58747015 |
| chr9 | 27524323 | 27556704 | 32382    | 2 | 1 | 6          | 0.02438996 | 0.08122616 | 3 | 8          | 0.51676182 | 0.4250187  |
| chr9 | 27556704 | 27626876 | 70173    | 2 | 1 | 6          | 0.02438996 | 0.129913   | 3 | 7          | 0.51676182 | 0.30102999 |
| chr9 | 27626876 | 27626935 | 60       | 1 | 1 | 7          | 0.02438996 | 0.13499366 | 3 | 8          | 0.51676182 | 0.30102999 |
| chr9 | 27626935 | 28014370 | 387436   | 4 | 1 | 6          | 0.02438996 | 0.129913   | 3 | 7          | 0.51676182 | 0.30102999 |
| chr9 | 28014370 | 28063806 | 49437    | 1 | 1 | 6          | 0.02438996 | 0.20064824 | 3 | 6          | 0.51676182 | 0.20064824 |
| chr9 | 28063806 | 28139825 | 76020    | 1 | 1 | 5          | 0.02438996 | 0.12309572 | 3 | 6          | 0.51676182 | 0.30102999 |
| chr9 | 28139825 | 28133665 | 73541    | 2 | 1 | 6          | 0.02438996 | 0.129913   | 3 | 7          | 0.51676182 | 0.30102999 |
| chr9 | 28133665 | 28335486 | 122122   | 3 | 1 | 7          | 0.02438996 | 0.20469099 | 3 | 7          | 0.51676182 | 0.20469099 |
| chr9 | 28335486 | 28428131 | 92646    | 2 | 1 | 7          | 0.02438996 | 0.43181735 | 3 | 5          | 0.51676182 | 0.07511598 |
| chr9 | 28428131 | 28462162 | 34032    | 2 | 1 | 7          | 0.02438996 | 0.30102999 | 3 | 6          | 0.51676182 | 0.129913   |
| chr9 | 28462162 | 28519628 | 57467    | 1 | 1 | 5          | 0.02438996 | 0.19510895 | 3 | 5          | 0.51676182 | 0.19510895 |
| chr9 | 28519628 | 28606661 | 87034    | 2 | 1 | 5          | 0.02438996 | 0.30102999 | 3 | 4          | 0.51676182 | 0.11390336 |
| chr9 | 28606661 | 28606720 | 60       | 1 | 1 | 6          | 0.02438996 | 0.44141547 | 3 | 4          | 0.51676182 | 0.06713722 |
| chr9 | 28606720 | 28887418 | 280699   | 6 | 1 | 4          | 0.02438996 | 0.30102999 | 3 | 3          | 0.51676182 | 0.1012019  |
| chr9 | 28887418 | 29022489 | 135072   | 2 | 1 | 3          | 0.02438996 | 0.17593012 | 3 | 3          | 0.51676182 | 0.17593012 |
| chr9 | 29022489 | 29022548 | 60       | 1 | 1 | 5          | 0.02438996 | 0.45545077 | 3 | 3          | 0.51676182 | 0.45545077 |
| chr9 | 29022548 | 29137041 | 114494   | 0 | 2 | 2          | 0          | 0.08289318 | 3 | 3          | 0.93173516 | 0.30102999 |
| chr9 | 29137041 | 29255382 | 118342   | 2 | 0 | 2          | 0          | 0.08289318 | 2 | 3          | 0.61140001 | 0.30102999 |
| chr9 | 29255382 | 29457747 | 202356   | 2 | 0 | 2          | 0          | 0          | 1 | 3          | 0.30102999 | 0.30102999 |
| chr9 | 29457747 | 29601835 | 144089   | 0 | 4 | 0          | 0          | 0.30102999 | 0 | 3          | 0.30102999 | 0.1012019  |
| chr9 | 29601835 | 29601894 | 60       | 1 | 0 | 6          | 0          | 0.63695542 | 1 | 1          | 0.30102999 | 0.03070643 |
| chr9 | 29601894 | 29753333 | 151440   | 0 | 3 | 3          | 0          | 0.17593012 | 1 | 3          | 0.30102999 | 0.17593012 |
| chr9 | 29753333 | 29753392 | 60       | 1 | 0 | 3          | 0          | 0.10122019 | 1 | 4          | 0.30102999 | 0.30102999 |
| chr9 | 29753392 | 30144402 | 391011   | 2 | 0 | 2          | 0          | 0.08289318 | 0 | 3          | 0          | 0.30102999 |
| chr9 | 30144402 | 30144461 | 60       | 1 | 0 | 2          | 0          | 0.0429175  | 0 | 4          | 0          | 0.47744371 |
| chr9 | 30144461 | 30247394 | 102934   | 1 | 0 | 2          | 0          | 0.08289318 | 0 | 3          | 0          | 0.30102999 |
| chr9 | 30247394 | 30424069 | 176676   | 2 | 0 | 2          | 0          | 0.08289318 | 1 | 3          | 0.30102999 | 0.30102999 |
| chr9 | 30424069 | 30424128 | 60       | 1 | 0 | 3          | 0          | 0.10122019 | 1 | 4          | 0.30102999 | 0.30102999 |
| chr9 | 30424128 | 30660176 | 236049   | 3 | 0 | 3          | 0          | 0.17593012 | 1 | 3          | 0.30102999 | 0.17593012 |
| chr9 | 30660176 | 30660235 | 60       | 1 | 0 | 4          | 0          | 0.30102999 | 1 | 3          | 0.30102999 | 0.1012019  |
| chr9 | 30660235 | 30810232 | 149998   | 2 | 0 | 2          | 0          | 0.30102999 | 1 | 2          | 0.30102999 | 0.08289318 |
| chr9 | 30810232 | 30810291 | 60       | 1 | 0 | 3          | 0          | 0.30102999 | 2 | 2          | 0.61140001 | 0.08289318 |
| chr9 | 30810291 | 31144867 | 334577   | 3 | 0 | 2          | 0          | 0.1575501  | 2 | 2          | 0.61140001 | 0.1575501  |
| chr9 | 31144867 | 31367313 | 222447   | 4 | 1 | 2          | 0.05404976 | 0.1575501  | 2 | 2          | 0.30102999 | 0.1575501  |
| chr9 | 31367313 | 31510599 | 143287   | 3 | 1 | 2          | 0.05404976 | 0.08289318 | 2 | 3          | 0.30102999 | 0.30102999 |
| chr9 | 31510599 | 31642000 | 131402   | 1 | 1 | 2          | 0.05404976 | 0.1575501  | 2 | 2          | 0.30102999 | 0.1575501  |
| chr9 | 31642000 | 31723924 | 81925    | 2 | 1 | 2          | 0.01091641 | 0.1575501  | 4 | 2          | 0.76005302 | 0.1575501  |
| chr9 | 31723924 | 31723983 | 60       | 1 | 1 | 3          | 0.01091641 | 0.30102999 | 4 | 2          | 0.76005302 | 0.08289318 |
| chr9 | 31723983 | 31891415 | 167433   | 1 | 1 | 2          | 0.01091641 | 0.1575501  | 4 | 2          | 0.76005302 | 0.1575501  |
| chr9 | 31891415 | 31891474 | 60       | 1 | 1 | 2          | 0.01091641 | 0.08289318 | 4 | 3          | 0.76005302 | 0.30102999 |
| chr9 | 31891474 | 32030469 | 138996   | 1 | 1 | 2          | 0.02438996 | 0.08289318 | 3 | 3          | 0.51676182 | 0.30102999 |
| chr9 | 32030469 | 32030528 | 60       | 1 | 1 | 2          | 0.02438996 | 0.0429175  | 3 | 4          | 0.51676182 | 0.47744371 |
| chr9 | 32030528 | 32205770 | 175243   | 1 | 1 | 2          | 0.02438996 | 0.08289318 | 3 | 3          | 0.51676182 | 0.30102999 |
| chr9 | 32205770 | 32293241 | 87472    | 2 | 1 | 2          | 0.02438996 | 0.0429175  | 3 | 4          | 0.51676182 | 0.47744371 |
| chr9 | 32293241 | 32293300 | 60       | 1 | 1 | 2          | 0.01091641 | 0.02162467 | 4 | 5          | 0.76005302 | 0.68214471 |
| chr9 | 32293300 | 32342016 | 48717    | 1 | 1 | 2          | 0.02438996 | 0.02162467 | 3 | 5          | 0.51676182 | 0.68214471 |
| chr9 | 32342016 | 32384264 | 42249    | 1 | 1 | 2          | 0.02438996 | 0.0429175  | 3 | 4          | 0.51676182 | 0.47744371 |
| chr9 | 32384264 | 32456057 | 71794    | 4 | 2 | 2          | 0.08289318 | 0.0429175  | 3 | 4          | 0.30102999 | 0.4774437  |

|      |          |          |        |    |   |   |            |            |   |   |            |            |
|------|----------|----------|--------|----|---|---|------------|------------|---|---|------------|------------|
| chr9 | 34257917 | 34257975 | 59     | 1  | 2 | 5 | 0.02162467 | 0.07511598 | 5 | 7 | 0.68214471 | 0.43181735 |
| chr9 | 34257975 | 34310936 | 52962  | 1  | 2 | 4 | 0.02162467 | 0.03812622 | 5 | 7 | 0.68214471 | 0.60763643 |
| chr9 | 34310936 | 34336250 | 25315  | 2  | 2 | 4 | 0.01053319 | 0.03812622 | 6 | 7 | 0.91219088 | 0.60763643 |
| chr9 | 34336250 | 34381835 | 45586  | 2  | 5 | 5 | 0.01053319 | 0.04407651 | 6 | 8 | 0.91219088 | 0.58747015 |
| chr9 | 34381835 | 34418362 | 36528  | 1  | 2 | 5 | 0.02162467 | 0.04407651 | 5 | 8 | 0.68214471 | 0.58747015 |
| chr9 | 34418362 | 34472098 | 53737  | 1  | 2 | 3 | 0.02162467 | 0.0079614  | 5 | 8 | 0.68214471 | 1.07548421 |
| chr9 | 34472098 | 34520945 | 48848  | 1  | 2 | 3 | 0.02162467 | 0.01598258 | 5 | 7 | 0.68214471 | 0.84395715 |
| chr9 | 34520945 | 34588605 | 67661  | 3  | 2 | 3 | 0.01053319 | 0.01598258 | 6 | 7 | 0.91219088 | 0.84395715 |
| chr9 | 34588605 | 34588663 | 59     | 1  | 2 | 4 | 0.01053319 | 0.03812622 | 6 | 7 | 0.91219088 | 0.60763643 |
| chr9 | 34588663 | 34618506 | 29844  | 3  | 1 | 3 | 0.00204627 | 0.01598258 | 6 | 7 | 1.31360226 | 0.84395715 |
| chr9 | 34618506 | 34690988 | 72483  | 8  | 1 | 4 | 0.00204627 | 0.03812622 | 6 | 7 | 1.31360226 | 0.60763643 |
| chr9 | 34690988 | 34745832 | 54845  | 2  | 2 | 4 | 0.01053319 | 0.03812622 | 6 | 7 | 0.91219088 | 0.60763643 |
| chr9 | 34745832 | 34866614 | 120783 | 1  | 2 | 3 | 0.01053319 | 0.01598258 | 6 | 7 | 0.91219088 | 0.84395715 |
| chr9 | 34866614 | 34996134 | 129521 | 4  | 2 | 3 | 0.01053319 | 0.0079614  | 6 | 8 | 0.91219088 | 1.07548421 |
| chr9 | 34996134 | 35090704 | 94571  | 5  | 2 | 3 | 0.01053319 | 0.01598258 | 6 | 7 | 0.91219088 | 0.84395715 |
| chr9 | 35090704 | 35196492 | 105789 | 6  | 2 | 3 | 0.00493743 | 0.0079614  | 7 | 8 | 1.16581773 | 1.07548421 |
| chr9 | 35196492 | 35277729 | 81238  | 3  | 2 | 4 | 0.00493743 | 0.02074938 | 7 | 8 | 1.16581773 | 0.79906872 |
| chr9 | 35277729 | 35404384 | 126656 | 3  | 2 | 4 | 0.00493743 | 0.03812622 | 7 | 7 | 1.16581773 | 0.60763643 |
| chr9 | 35404384 | 35404443 | 60     | 1  | 2 | 4 | 0.00493743 | 0.02074938 | 7 | 8 | 1.16581773 | 0.79906872 |
| chr9 | 35404443 | 35664900 | 260458 | 7  | 2 | 4 | 0.00493743 | 0.03812622 | 7 | 7 | 1.16581773 | 0.60763643 |
| chr9 | 35664900 | 35708126 | 43237  | 5  | 2 | 4 | 0.00493743 | 0.06713722 | 7 | 6 | 1.16581773 | 0.44141547 |
| chr9 | 35708126 | 36100542 | 392417 | 16 | 2 | 1 | 0.00493743 | 0.03812622 | 7 | 7 | 1.16581773 | 0.60763643 |
| chr9 | 36100542 | 36171237 | 70986  | 2  | 1 | 4 | 0.00204627 | 0.03812622 | 6 | 7 | 1.31360226 | 0.60763643 |
| chr9 | 36171237 | 36344858 | 173622 | 5  | 2 | 4 | 0.01053319 | 0.03812622 | 6 | 7 | 0.91219088 | 0.60763643 |
| chr9 | 36344858 | 36589598 | 244741 | 4  | 2 | 4 | 0.02162467 | 0.03812622 | 5 | 7 | 0.68214471 | 0.60763643 |
| chr9 | 36589598 | 36657289 | 67692  | 3  | 2 | 4 | 0.01053319 | 0.03812622 | 6 | 7 | 0.91219088 | 0.60763643 |
| chr9 | 36657289 | 36669396 | 12108  | 1  | 2 | 4 | 0.02162467 | 0.03812622 | 5 | 7 | 0.68214471 | 0.60763643 |
| chr9 | 36669396 | 36749860 | 80465  | 1  | 4 | 4 | 0.00478973 | 0.06713722 | 5 | 6 | 1.02643191 | 0.44141547 |
| chr9 | 36749860 | 36846481 | 96622  | 1  | 2 | 3 | 0.00478973 | 0.0429175  | 5 | 7 | 1.02643191 | 0.47744371 |
| chr9 | 36846481 | 36893592 | 47112  | 2  | 1 | 4 | 0.00204627 | 0.05670724 | 6 | 5 | 1.31360226 | 0.45545077 |
| chr9 | 36893592 | 36940263 | 46672  | 2  | 1 | 5 | 0.00204627 | 0.19510895 | 6 | 5 | 1.31360226 | 0.19510895 |
| chr9 | 36940263 | 36992764 | 52502  | 1  | 6 | 6 | 0.00204627 | 0.30102999 | 6 | 5 | 1.31360226 | 0.12309572 |
| chr9 | 36992764 | 37087995 | 95323  | 2  | 1 | 4 | 0.00204627 | 0.18734596 | 6 | 4 | 1.31360226 | 0.18734596 |
| chr9 | 37087995 | 37088054 | 60     | 1  | 5 | 5 | 0.00204627 | 0.30102999 | 6 | 4 | 1.31360226 | 0.1139036  |
| chr9 | 37088054 | 37156220 | 68167  | 2  | 1 | 4 | 0.00204627 | 0.18734596 | 6 | 4 | 1.31360226 | 0.18734596 |
| chr9 | 37156220 | 37186847 | 30628  | 1  | 1 | 4 | 0.00478973 | 0.18734596 | 5 | 4 | 1.02643191 | 0.18734596 |
| chr9 | 37186847 | 37288449 | 101603 | 2  | 1 | 4 | 0.00478973 | 0.30102999 | 5 | 3 | 1.02643191 | 0.10122019 |
| chr9 | 37288449 | 37327772 | 39324  | 1  | 1 | 4 | 0.00478973 | 0.47744371 | 5 | 2 | 1.02643191 | 0.0429175  |
| chr9 | 37327772 | 37327830 | 59     | 1  | 1 | 4 | 0.00478973 | 0.30102999 | 5 | 3 | 1.02643191 | 0.10122019 |
| chr9 | 37327830 | 37460967 | 133138 | 3  | 1 | 2 | 0.01091641 | 0.1575501  | 4 | 2 | 0.76005302 | 0.1575501  |
| chr9 | 37460967 | 37501694 | 40728  | 3  | 1 | 2 | 0.00478973 | 0.1575501  | 5 | 2 | 1.02643191 | 0.1575501  |
| chr9 | 37501694 | 37501753 | 60     | 1  | 2 | 5 | 0.00204627 | 0.08289318 | 6 | 3 | 1.31360226 | 0.30102999 |
| chr9 | 37501753 | 37596391 | 94639  | 2  | 1 | 1 | 0.00478973 | 0.1218695  | 5 | 1 | 1.02643191 | 0.1218695  |
| chr9 | 37596391 | 37660586 | 64196  | 1  | 1 | 1 | 0.01091641 | 0.1218695  | 4 | 1 | 0.76005302 | 0.1218695  |
| chr9 | 37660586 | 37711328 | 50743  | 1  | 0 | 1 | 0          | 0.1218695  | 4 | 1 | 1.26272838 | 0.1218695  |
| chr9 | 37711328 | 37760851 | 49524  | 2  | 2 | 0 | 0.08289318 | 0.1218695  | 4 | 3 | 1.26272838 | 0.30102999 |
| chr9 | 37760851 | 37767193 | 6343   | 2  | 0 | 2 | 0          | 0.08289318 | 3 | 3 | 1.60515106 | 0.30102999 |
| chr9 | 37767193 | 37857269 | 90077  | 3  | 0 | 0 | 0.05404976 | 0.1218695  | 4 | 2 | 1.26272838 | 0.30102999 |
| chr9 | 37857269 | 37857328 | 60     | 1  | 1 | 1 | 0.00478973 | 0.05404976 | 5 | 2 | 1.02643191 | 0.30102999 |
| chr9 | 37857328 | 37960064 | 102737 | 3  | 1 | 1 | 0.01091641 | 0.05404976 | 4 | 2 | 0.76005302 | 0.30102999 |
| chr9 | 37960064 | 38143707 | 183644 | 3  | 1 | 1 | 0.01091641 | 0.1218695  | 5 | 1 | 0.76005302 | 0.1218695  |
| chr9 | 38143707 | 38205685 | 61979  | 1  | 1 | 1 | 0.02438896 | 0.1218695  | 3 | 1 | 0.51676182 | 0.1218695  |
| chr9 | 38205685 | 38663271 | 457587 | 8  | 0 | 1 | 0          | 0.1218695  | 3 | 1 | 0.93173516 | 0.1218695  |
| chr9 | 38663271 | 38768291 | 105021 | 1  | 0 | 1 | 0          | 0.30102999 | 3 | 0 | 0.93173516 | 0          |
| chr9 | 38768291 | 39156954 | 388664 | 2  | 0 | 0 | 0          | 0          | 1 | 0 | 0.30102999 | 0          |
| chr9 | 39156954 | 40095721 | 60376  | 2  | 1 | 0 | 0.05404976 | 0.05404976 | 2 | 2 | 0.30102999 | 0.61140001 |
| chr9 | 40095721 | 41217555 | 121835 | 4  | 1 | 0 | 0.05404976 | 0.05404976 | 2 | 3 | 0.30102999 | 0.93173516 |
| chr9 | 41217555 | 41491639 | 274085 | 6  | 1 | 0 | 0.05404976 | 0.05404976 | 2 | 4 | 0.30102999 | 1.26272838 |
| chr9 | 41491639 | 41491698 | 60     | 1  | 2 | 0 | 0.1575501  | 0.05404976 | 2 | 4 | 0.1575501  | 1.26272838 |
| chr9 | 41491698 | 41649155 | 157458 | 4  | 1 | 0 | 0.05404976 | 0.05404976 | 2 | 4 | 0.30102999 | 1.26272838 |
| chr9 | 41649155 | 41917699 | 268545 | 6  | 3 | 0 | 0.30102999 | 0.08289318 | 2 | 4 | 0.8289318  | 1.26272838 |
| chr9 | 41917699 | 41977019 | 59321  | 3  | 1 | 2 | 0.0102999  | 0.01091641 | 4 | 4 | 0.8289318  | 0.76005302 |
| chr9 | 41977019 | 41994158 | 17140  | 2  | 3 | 1 | 0.17593012 | 0.01091641 | 3 | 4 | 0.17593012 | 0.76005302 |
| chr9 | 41994158 | 42083648 | 89491  | 3  | 2 | 1 | 0.08289318 | 0.01091641 | 3 | 4 | 0.30102999 | 0.76005302 |
| chr9 | 42083648 | 42083707 | 60     | 1  | 3 | 1 | 0          | 0.17593012 | 3 | 4 | 0.17593012 | 0.76005302 |
| chr9 | 42083707 | 42137166 | 53460  | 1  | 3 | 1 | 0.08289318 | 0.01091641 | 3 | 4 | 0.30102999 | 0.76005302 |
| chr9 | 42137166 | 42224463 | 85297  | 2  | 2 | 1 | 0.1575501  | 0.01091641 | 2 | 4 | 0.1575501  | 0.76005302 |
| chr9 | 42224463 | 42272234 | 49773  | 1  | 1 | 1 | 0.05404976 | 0.01091641 | 4 | 4 | 0.30102999 | 0.76005302 |
| chr9 | 42272234 | 42272293 | 60     | 1  | 2 | 1 | 0.1575501  | 0.01091641 | 2 | 4 | 0.1575501  | 0.76005302 |
| chr9 | 42272293 | 42441389 | 169097 | 3  | 2 | 1 | 0.05404976 | 0.01091641 | 2 | 4 | 0.30102999 | 0.76005302 |
| chr9 | 42441389 | 42464871 | 23483  | 2  | 1 | 2 | 0.1575501  | 0.01091641 | 2 | 4 | 0.1575501  | 0.76005302 |
| chr9 | 42464871 | 42464930 | 60     | 1  | 4 | 1 | 0.47744371 | 0.01091641 | 2 | 4 | 0.0429175  | 0.76005302 |
| chr9 | 42464930 | 42702982 | 238053 | 3  | 1 | 3 | 0.0102999  | 0.01091641 | 2 | 4 | 0.08289318 | 0.76005302 |
| chr9 | 42702982 | 42703041 | 60     | 1  | 4 | 1 | 0.30102999 | 0.01091641 | 3 | 4 | 0.10122019 | 0.76005302 |
| chr9 | 42703041 | 42758637 | 55597  | 2  | 4 | 1 | 0.47744371 | 0.01091641 | 2 | 4 | 0.0429175  | 0.76005302 |
| chr9 | 42758637 | 42937200 | 178564 | 3  | 3 | 1 | 0.30102999 | 0.01091641 | 2 | 4 | 0.08289318 | 0.76005302 |
| chr9 | 42937200 | 42968479 | 31280  | 2  | 1 | 1 | 0.17593012 | 0.01091641 | 3 | 4 | 0.17593012 | 0.76005302 |
| chr9 | 42968479 | 43309372 | 340894 | 7  | 2 | 1 | 0.08289318 | 0.01091641 | 3 | 4 | 0.30102999 | 0.76005302 |
| chr9 | 43309372 | 43462272 | 152901 | 4  | 1 | 1 | 0.02438896 | 0.01091641 | 3 | 4 | 0.51676182 | 0.76005302 |
| chr9 | 43462272 | 43462331 | 60     | 1  | 1 | 1 | 0.02438896 | 0.00478973 | 3 | 5 | 0.51676182 | 1.02643191 |
| chr9 | 43462331 | 43588788 | 126458 | 4  | 1 | 1 | 0.02438896 | 0.01091641 | 3 | 4 | 0.51676182 | 0.76005302 |
| chr9 | 43588788 | 43688965 | 100178 | 3  | 1 | 1 | 0.02438896 | 0.00478973 | 3 | 5 | 0.51676182 | 1.02643191 |
| chr9 | 43688965 | 43736251 | 47287  | 2  | 2 | 1 | 0.08289318 | 0.00478973 | 3 | 5 | 0.30102999 | 1.02643191 |
| chr9 | 43736251 | 43861618 | 125368 | 2  | 1 | 1 | 0.02438896 | 0.01091641 | 3 | 4 | 0.51676182 | 0.76005302 |
| chr9 | 43861618 | 44298697 | 437080 | 9  | 1 | 1 | 0.02438896 | 0.00478973 | 3 | 5 | 0.51676182 | 1.02643191 |
| chr9 | 44298697 | 44340500 | 41804  | 1  | 1 | 1 | 0.02438896 | 0.01091641 | 3 | 4 | 0.51676182 | 0.76005302 |
| chr9 | 44340500 | 44360324 | 19825  | 2  | 2 | 1 | 0.08289318 | 0.01091641 | 3 | 4 | 0.30102999 | 0.76005302 |
| chr9 | 44360324 | 44360381 | 58     | 1  | 2 | 1 | 0.08289318 | 0.00478973 | 3 | 5 | 0.30102999 | 1.02643191 |
| chr9 | 44360381 | 44481204 | 120824 | 2  | 2 | 1 | 0.02438896 | 0.00478973 | 3 | 5 | 0.51676182 | 1.02643191 |
| chr9 | 44481204 | 44587593 | 106390 | 4  | 1 | 1 | 0.01091641 | 0.00478973 | 4 | 5 | 0.76005302 | 1.02643191 |
| chr9 | 44587593 | 44666008 | 78416  | 2  | 1 |   |            |            |   |   |            |            |

|      |          |          |        |    |   |   |            |            |   |   |            |            |
|------|----------|----------|--------|----|---|---|------------|------------|---|---|------------|------------|
| chr9 | 77563714 | 78004387 | 440674 | 10 | 2 | 0 | 0.08289318 | 0          | 3 | 3 | 0.30102999 | 0.93173516 |
| chr9 | 78004387 | 78086127 | 81741  | 2  | 3 | 0 | 0.17593012 | 0          | 3 | 3 | 0.17593012 | 0.93173516 |
| chr9 | 78086127 | 78086186 | 60     | 1  | 3 | 0 | 0.10122019 | 0          | 4 | 3 | 0.30102999 | 0.93173516 |
| chr9 | 78086186 | 78307262 | 221077 | 1  | 3 | 0 | 0.17593012 | 0          | 3 | 3 | 0.17593012 | 0.93173516 |
| chr9 | 78307262 | 78547409 | 240148 | 2  | 2 | 0 | 0.08289318 | 0          | 3 | 3 | 0.30102999 | 0.93173516 |
| chr9 | 78547409 | 78702938 | 155530 | 3  | 2 | 0 | 0.1575501  | 0          | 2 | 3 | 0.1575501  | 0.93173516 |
| chr9 | 78702938 | 79528912 | 825975 | 18 | 2 | 0 | 0.1575501  | 0          | 2 | 2 | 0.1575501  | 0.61140001 |
| chr9 | 79528912 | 79583399 | 54488  | 2  | 3 | 0 | 0.30102999 | 0          | 2 | 2 | 0.08289318 | 0.61140001 |
| chr9 | 79583399 | 80356196 | 772798 | 16 | 2 | 0 | 0.1575501  | 0          | 2 | 2 | 0.1575501  | 0.61140001 |
| chr9 | 80356196 | 80804457 | 448262 | 7  | 2 | 0 | 0.1575501  | 0          | 2 | 1 | 0.1575501  | 0.30102999 |
| chr9 | 80804457 | 80915162 | 110706 | 3  | 2 | 0 | 0.1575501  | 0          | 2 | 3 | 0.1575501  | 0.93173516 |
| chr9 | 80915162 | 81186684 | 271523 | 3  | 1 | 0 | 0.05404976 | 0          | 2 | 2 | 0.30102999 | 0.61140001 |
| chr9 | 81186684 | 81400580 | 213897 | 2  | 1 | 0 | 0.1218695  | 0          | 1 | 2 | 0.1218695  | 0.61140001 |
| chr9 | 81400580 | 81488146 | 87567  | 2  | 2 | 0 | 0.1575501  | 0          | 2 | 2 | 0.1575501  | 0.61140001 |
| chr9 | 81488146 | 81488205 | 60     | 1  | 2 | 0 | 0.1575501  | 0          | 2 | 3 | 0.1575501  | 0.93173516 |
| chr9 | 81488205 | 81596633 | 108429 | 1  | 2 | 0 | 0.1575501  | 0          | 2 | 2 | 0.1575501  | 0.61140001 |
| chr9 | 81596633 | 81978151 | 381519 | 3  | 2 | 0 | 0.30102999 | 0          | 1 | 2 | 0.05404976 | 0.61140001 |
| chr9 | 81978151 | 82269003 | 290853 | 5  | 2 | 1 | 0.30102999 | 0.02438896 | 1 | 3 | 0.05404976 | 0.51676182 |
| chr9 | 82269003 | 82355013 | 86011  | 2  | 1 | 1 | 0.1218695  | 0.02438896 | 1 | 3 | 0.1218695  | 0.51676182 |
| chr9 | 82355013 | 82355072 | 60     | 1  | 2 | 1 | 0.1575501  | 0.02438896 | 2 | 3 | 0.1575501  | 0.51676182 |
| chr9 | 82355072 | 82449899 | 94888  | 1  | 1 | 0 | 0.05404976 | 0          | 2 | 2 | 0.30102999 | 0.61140001 |
| chr9 | 82449899 | 83003277 | 552969 | 7  | 2 | 0 | 0.05404976 | 0          | 2 | 3 | 0.30102999 | 0.93173516 |
| chr9 | 83003277 | 83002986 | 60     | 1  | 1 | 1 | 0.05404976 | 0.01091641 | 2 | 4 | 0.30102999 | 0.76005302 |
| chr9 | 83002986 | 83175374 | 172389 | 2  | 1 | 0 | 0.05404976 | 0          | 2 | 2 | 0.30102999 | 0.61140001 |
| chr9 | 83175374 | 83691625 | 516252 | 5  | 1 | 0 | 0.05404976 | 0          | 2 | 1 | 0.30102999 | 0.30102999 |
| chr9 | 83691625 | 83959649 | 268025 | 2  | 1 | 0 | 0.05404976 | 0          | 2 | 3 | 0.30102999 | 0.93173516 |
| chr9 | 83959649 | 84115644 | 155996 | 2  | 2 | 0 | 0.05404976 | 0          | 1 | 1 | 0.30102999 | 0.30102999 |
| chr9 | 84115644 | 84198666 | 83023  | 2  | 2 | 0 | 0.1575501  | 0          | 2 | 2 | 0.1575501  | 0.61140001 |
| chr9 | 84198666 | 84782517 | 583852 | 12 | 2 | 0 | 0.1575501  | 0          | 2 | 3 | 0.1575501  | 0.93173516 |
| chr9 | 84782517 | 84782576 | 60     | 1  | 2 | 1 | 0.1575501  | 0.02438896 | 2 | 3 | 0.1575501  | 0.51676182 |
| chr9 | 84782576 | 85032783 | 250208 | 2  | 2 | 0 | 0.1575501  | 0          | 2 | 2 | 0.1575501  | 0.61140001 |
| chr9 | 85032783 | 85070123 | 37341  | 2  | 1 | 1 | 0.1575501  | 0.01091641 | 2 | 4 | 0.1575501  | 0.76005302 |
| chr9 | 85070123 | 85070182 | 60     | 1  | 2 | 1 | 0.1575501  | 0.0429175  | 2 | 4 | 0.1575501  | 0.47744371 |
| chr9 | 85070182 | 85409863 | 339682 | 4  | 2 | 2 | 0.1575501  | 0.01091641 | 4 | 4 | 0.1575501  | 0.76005302 |
| chr9 | 85409863 | 85409922 | 60     | 1  | 2 | 2 | 0.1575501  | 0.0429175  | 2 | 4 | 0.1575501  | 0.47744371 |
| chr9 | 85409922 | 85605326 | 195405 | 2  | 1 | 1 | 0.1575501  | 0.01091641 | 4 | 4 | 0.1575501  | 0.76005302 |
| chr9 | 85605326 | 85640798 | 35473  | 2  | 2 | 2 | 0.1575501  | 0.0429175  | 2 | 4 | 0.1575501  | 0.47744371 |
| chr9 | 85640798 | 85753828 | 113031 | 2  | 2 | 2 | 0.1575501  | 0.08289318 | 2 | 3 | 0.1575501  | 0.30102999 |
| chr9 | 85753828 | 85857357 | 103530 | 2  | 2 | 2 | 0.1575501  | 0.0429175  | 2 | 4 | 0.1575501  | 0.47744371 |
| chr9 | 85857357 | 86188974 | 331618 | 7  | 2 | 2 | 0.1575501  | 0.01091641 | 2 | 4 | 0.1575501  | 0.76005302 |
| chr9 | 86188974 | 86248532 | 59559  | 2  | 2 | 0 | 0.1575501  | 0          | 2 | 4 | 0.1575501  | 1.26272838 |
| chr9 | 86248532 | 86356860 | 108329 | 3  | 2 | 0 | 0.1575501  | 0          | 2 | 3 | 0.1575501  | 0.93173516 |
| chr9 | 86356860 | 86496264 | 139405 | 4  | 2 | 0 | 0.1575501  | 0          | 2 | 4 | 0.1575501  | 1.26272838 |
| chr9 | 86496264 | 86496323 | 60     | 1  | 2 | 2 | 0.1575501  | 0.0429175  | 2 | 4 | 0.1575501  | 0.47744371 |
| chr9 | 86496323 | 86570445 | 74123  | 2  | 2 | 0 | 0.1575501  | 0          | 2 | 4 | 0.1575501  | 1.26272838 |
| chr9 | 86570445 | 86592592 | 22148  | 2  | 2 | 2 | 0.1575501  | 0.0429175  | 2 | 4 | 0.1575501  | 0.47744371 |
| chr9 | 86592592 | 87039456 | 446865 | 6  | 2 | 1 | 0.1575501  | 0.01091641 | 2 | 4 | 0.1575501  | 0.76005302 |
| chr9 | 87039456 | 87430380 | 390925 | 7  | 2 | 2 | 0.1575501  | 0.0429175  | 2 | 4 | 0.1575501  | 0.47744371 |
| chr9 | 87430380 | 87476029 | 45650  | 1  | 2 | 1 | 0.1575501  | 0.01091641 | 4 | 4 | 0.1575501  | 0.76005302 |
| chr9 | 87476029 | 87595872 | 119844 | 2  | 2 | 1 | 0.1575501  | 0.02438896 | 2 | 3 | 0.1575501  | 0.51676182 |
| chr9 | 87595872 | 87654624 | 58753  | 2  | 2 | 0 | 0.1575501  | 0          | 2 | 2 | 0.1575501  | 0.61140001 |
| chr9 | 87654624 | 87926084 | 271461 | 3  | 2 | 2 | 0.1575501  | 0.02438896 | 2 | 3 | 0.1575501  | 0.51676182 |
| chr9 | 87926084 | 87926143 | 60     | 1  | 2 | 1 | 0.1575501  | 0.01091641 | 4 | 4 | 0.1575501  | 0.76005302 |
| chr9 | 87926143 | 88142954 | 216812 | 2  | 2 | 1 | 0.1575501  | 0.02438896 | 2 | 3 | 0.1575501  | 0.51676182 |
| chr9 | 88142954 | 88167757 | 24804  | 2  | 1 | 2 | 0.1575501  | 0.01091641 | 2 | 4 | 0.1575501  | 0.76005302 |
| chr9 | 88167757 | 88202561 | 34805  | 1  | 2 | 1 | 0.1575501  | 0.02438896 | 2 | 3 | 0.1575501  | 0.51676182 |
| chr9 | 88202561 | 88202620 | 60     | 1  | 2 | 2 | 0.1575501  | 0.08289318 | 3 | 3 | 0.1575501  | 0.30102999 |
| chr9 | 88202620 | 88298964 | 96345  | 3  | 2 | 2 | 0.1575501  | 0.1575501  | 2 | 2 | 0.1575501  | 0.1575501  |
| chr9 | 88298964 | 88345162 | 46199  | 2  | 2 | 1 | 0.1575501  | 0.08289318 | 2 | 3 | 0.1575501  | 0.30102999 |
| chr9 | 88345162 | 88713319 | 368158 | 8  | 2 | 1 | 0.1575501  | 0.05404976 | 2 | 3 | 0.1575501  | 0.30102999 |
| chr9 | 88713319 | 89077436 | 364118 | 9  | 2 | 1 | 0.08289318 | 0.05404976 | 3 | 2 | 0.30102999 | 0.30102999 |
| chr9 | 89077436 | 89346554 | 269119 | 2  | 2 | 0 | 0.08289318 | 0          | 3 | 2 | 0.30102999 | 0.61140001 |
| chr9 | 89346554 | 89589995 | 243442 | 3  | 2 | 1 | 0.1575501  | 0          | 2 | 1 | 0.1575501  | 0.30102999 |
| chr9 | 89589995 | 89590054 | 60     | 1  | 3 | 0 | 0.17593012 | 0.05404976 | 2 | 2 | 0.17593012 | 0.30102999 |
| chr9 | 89590054 | 89585874 | 65821  | 1  | 3 | 1 | 0.30102999 | 0.05404976 | 2 | 2 | 0.08289318 | 0.30102999 |
| chr9 | 89585874 | 89805789 | 149516 | 4  | 3 | 2 | 0.30102999 | 0.05404976 | 2 | 2 | 0.08289318 | 0.1575501  |
| chr9 | 89805789 | 89947529 | 141741 | 1  | 3 | 2 | 0.30102999 | 0.05404976 | 2 | 1 | 0.08289318 | 0.05404976 |
| chr9 | 89947529 | 90033495 | 85667  | 1  | 3 | 1 | 0.30102999 | 0.1218695  | 2 | 2 | 0.08289318 | 0.1218695  |
| chr9 | 90033495 | 90100688 | 67194  | 2  | 3 | 1 | 0.30102999 | 0.05404976 | 2 | 2 | 0.08289318 | 0.30102999 |
| chr9 | 90100688 | 90132550 | 31863  | 2  | 3 | 2 | 0.30102999 | 0.1575501  | 2 | 2 | 0.08289318 | 0.1575501  |
| chr9 | 90132550 | 90216070 | 83521  | 2  | 1 | 0 | 0.30102999 | 0.05404976 | 2 | 2 | 0.08289318 | 0.30102999 |
| chr9 | 90216070 | 90342208 | 126139 | 4  | 3 | 3 | 0.30102999 | 0.30102999 | 2 | 2 | 0.08289318 | 0.08289318 |
| chr9 | 90342208 | 90503818 | 161611 | 4  | 3 | 3 | 0.30102999 | 0.17593012 | 3 | 3 | 0.08289318 | 0.17593012 |
| chr9 | 90503818 | 90619639 | 115822 | 2  | 3 | 2 | 0.30102999 | 0.08289318 | 2 | 3 | 0.08289318 | 0.30102999 |
| chr9 | 90619639 | 90721528 | 101890 | 2  | 2 | 2 | 0.1575501  | 0.1575501  | 2 | 2 | 0.1575501  | 0.1575501  |
| chr9 | 90721528 | 90803353 | 81826  | 2  | 2 | 2 | 0.1575501  | 0.08289318 | 2 | 3 | 0.1575501  | 0.30102999 |
| chr9 | 90803353 | 91007979 | 204627 | 4  | 2 | 2 | 0.1575501  | 0.0429175  | 4 | 4 | 0.1575501  | 0.47744371 |
| chr9 | 91007979 | 91093348 | 85370  | 3  | 2 | 2 | 0.1575501  | 0.02162467 | 5 | 2 | 0.1575501  | 0.68214471 |
| chr9 | 91093348 | 91093407 | 60     | 1  | 3 | 2 | 0.1575501  | 0.05670724 | 2 | 5 | 0.1575501  | 0.45545077 |
| chr9 | 91093407 | 91190032 | 96626  | 3  | 1 | 3 | 0.05404976 | 0.05670724 | 2 | 5 | 0.30102999 | 0.45545077 |
| chr9 | 91190032 | 91680525 | 490494 | 8  | 1 | 2 | 0.05404976 | 0.02162467 | 2 | 5 | 0.30102999 | 0.68214471 |
| chr9 | 91680525 | 91770153 | 89629  | 2  | 1 | 1 | 0.05404976 | 0.02438896 | 2 | 3 | 0.30102999 | 0.51676182 |
| chr9 | 91770153 | 91770201 | 49     | 1  | 2 | 1 | 0.05404976 | 0.0429175  | 2 | 4 | 0.30102999 | 0.47744371 |
| chr9 | 91770201 | 92014232 | 244032 | 8  | 1 | 1 | 0.05404976 | 0.02438896 | 2 | 3 | 0.30102999 | 0.51676182 |
| chr9 | 92014232 | 92221377 | 207146 | 3  | 1 | 1 | 0.05404976 | 0.05404976 | 2 | 2 | 0.30102999 | 0.30102999 |
| chr9 | 92221377 | 92297837 | 76461  | 3  | 1 | 2 | 0.05404976 | 0.08289318 | 2 | 3 | 0.30102999 | 0.30102999 |
| chr9 | 92297837 | 92484319 | 186483 | 1  | 2 | 2 | 0.1218695  | 0.08289318 | 1 | 3 | 0.1218695  | 0.30102999 |
| chr9 | 92484319 | 92484378 | 60     | 1  | 1 | 2 | 0.1218695  | 0.02162467 | 1 | 5 | 0.1218695  | 0.68214471 |
| chr9 | 92484378 | 92751038 | 266661 | 1  | 1 | 1 | 0.1218695  | 0.02438896 | 1 | 3 | 0.1218695  | 0.51676182 |
| chr9 | 92751038 | 92751097 | 60     | 1  | 1 | 1 | 0.05404976 | 0.02438896 | 1 | 2 | 0.30102999 | 0.51676182 |
| chr9 | 92751097 | 92875550 | 124454 | 1  | 1 | 0 | 0.05404976 | 0          | 2 | 3 | 0.30102999 | 0.93173516 |
| chr9 | 92875550 | 92965804 | 90255  | 1  | 1 | 0 | 0.05404976 | 0          | 2 | 1 | 0.30102999 | 0.30102999 |
| chr9 | 92965804 | 93372163 | 406360 | 4  | 1 | 0 | 0.05404976 |            |   |   |            |            |

|      |           |           |        |    |   |   |            |            |   |   |            |            |
|------|-----------|-----------|--------|----|---|---|------------|------------|---|---|------------|------------|
| chr9 | 96080473  | 96080532  | 60     | 1  | 1 | 3 | 0.1218695  | 0.03070643 | 1 | 6 | 0.1218695  | 0.63695542 |
| chr9 | 96080532  | 96191008  | 110477 | 3  | 1 | 2 | 0.1218695  | 0.01053319 | 1 | 6 | 0.1218695  | 0.91219088 |
| chr9 | 96191008  | 96285544  | 94537  | 4  | 1 | 3 | 0.1218695  | 0.01598258 | 1 | 7 | 0.1218695  | 0.84395715 |
| chr9 | 96285544  | 96285603  | 60     | 1  | 1 | 3 | 0.1218695  | 0.0079614  | 1 | 8 | 0.1218695  | 1.07548421 |
| chr9 | 96285603  | 96447813  | 162211 | 3  | 1 | 3 | 0.1218695  | 0.01598258 | 1 | 7 | 0.1218695  | 0.84395715 |
| chr9 | 96447813  | 96681493  | 233681 | 2  | 1 | 2 | 0.1218695  | 0.00493743 | 1 | 7 | 0.1218695  | 1.16581773 |
| chr9 | 96681493  | 96794163  | 112671 | 2  | 1 | 1 | 0.1218695  | 0.00204627 | 1 | 6 | 0.1218695  | 1.31360226 |
| chr9 | 96794163  | 96827115  | 32953  | 2  | 1 | 2 | 0.1218695  | 0.00493743 | 1 | 7 | 0.1218695  | 1.16581773 |
| chr9 | 96827115  | 96888888  | 61774  | 1  | 1 | 2 | 0.1218695  | 0.01053319 | 1 | 6 | 0.1218695  | 0.91219088 |
| chr9 | 96888888  | 96932958  | 44071  | 2  | 1 | 2 | 0.1218695  | 0.00493743 | 1 | 7 | 0.1218695  | 1.16581773 |
| chr9 | 96932958  | 96933017  | 60     | 1  | 1 | 3 | 0.1218695  | 0.01598258 | 1 | 7 | 0.1218695  | 0.84395715 |
| chr9 | 96933017  | 97023815  | 90799  | 2  | 1 | 3 | 0.30102999 | 0.01598258 | 0 | 7 | 0          | 0.84395715 |
| chr9 | 97023815  | 97055632  | 31818  | 2  | 1 | 2 | 0.30102999 | 0.00493743 | 0 | 7 | 0          | 1.16581773 |
| chr9 | 97055632  | 97223165  | 167534 | 2  | 1 | 2 | 0.30102999 | 0.01053319 | 0 | 6 | 0          | 0.91219088 |
| chr9 | 97223165  | 97320282  | 97118  | 3  | 1 | 3 | 0.30102999 | 0.03070643 | 0 | 6 | 0          | 0.63695542 |
| chr9 | 97320282  | 97375641  | 55360  | 2  | 1 | 2 | 0.30102999 | 0.02162467 | 0 | 5 | 0          | 0.68214471 |
| chr9 | 97375641  | 97380088  | 4448   | 2  | 1 | 2 | 0.30102999 | 0.01053319 | 0 | 6 | 0          | 0.91219088 |
| chr9 | 97380088  | 97387158  | 7071   | 1  | 1 | 1 | 0.30102999 | 0.00478973 | 0 | 5 | 0          | 1.02643191 |
| chr9 | 97387158  | 97522014  | 134857 | 2  | 1 | 0 | 0.30102999 | 0          | 0 | 5 | 0          | 1.60515106 |
| chr9 | 97522014  | 97522073  | 60     | 1  | 2 | 1 | 0.61140001 | 0.00478973 | 0 | 5 | 0          | 1.02643191 |
| chr9 | 97522073  | 97587748  | 65676  | 2  | 2 | 0 | 0.61140001 | 0          | 0 | 5 | 0          | 1.60515106 |
| chr9 | 97587748  | 97587807  | 60     | 1  | 1 | 0 | 0.30102999 | 0          | 1 | 5 | 0.05404976 | 1.60515106 |
| chr9 | 97587807  | 97827936  | 240130 | 5  | 2 | 0 | 0.61140001 | 0          | 0 | 5 | 0          | 1.60515106 |
| chr9 | 97827936  | 97843085  | 15150  | 2  | 2 | 0 | 0.61140001 | 0.00478973 | 0 | 5 | 0          | 1.02643191 |
| chr9 | 97843085  | 98078300  | 235216 | 5  | 2 | 1 | 0.61140001 | 0.02438896 | 0 | 3 | 0          | 0.51676182 |
| chr9 | 98078300  | 98078359  | 60     | 1  | 2 | 1 | 0.61140001 | 0.01091641 | 0 | 4 | 0          | 0.76005302 |
| chr9 | 98078359  | 98200891  | 122533 | 2  | 2 | 0 | 0.61140001 | 0          | 0 | 4 | 0          | 1.26272838 |
| chr9 | 98200891  | 98200950  | 60     | 1  | 2 | 0 | 0.61140001 | 0          | 0 | 5 | 0          | 1.60515106 |
| chr9 | 98200950  | 98233617  | 32668  | 1  | 1 | 0 | 0.30102999 | 0          | 0 | 5 | 0          | 1.60515106 |
| chr9 | 98233617  | 98373804  | 140188 | 3  | 1 | 0 | 0.30102999 | 0          | 0 | 6 | 0          | 1.95986592 |
| chr9 | 98373804  | 98513438  | 139635 | 2  | 0 | 0 | 0          | 0          | 0 | 6 | 0          | 1.95986592 |
| chr9 | 98513438  | 99160554  | 647117 | 11 | 0 | 0 | 0          | 0          | 0 | 5 | 0          | 1.60515106 |
| chr9 | 99160554  | 99178917  | 18364  | 2  | 0 | 0 | 0          | 0          | 0 | 4 | 0          | 1.26272838 |
| chr9 | 99178917  | 99178976  | 60     | 1  | 0 | 0 | 0          | 0          | 0 | 5 | 0          | 1.60515106 |
| chr9 | 99178976  | 99223270  | 44295  | 1  | 0 | 0 | 0          | 0          | 0 | 4 | 0          | 1.26272838 |
| chr9 | 99223270  | 99343936  | 120667 | 3  | 0 | 1 | 0          | 0.01091641 | 0 | 4 | 0          | 0.76005302 |
| chr9 | 99343936  | 99343995  | 60     | 1  | 0 | 1 | 0          | 0.00478973 | 0 | 5 | 0          | 1.02643191 |
| chr9 | 99343995  | 99373477  | 29483  | 1  | 0 | 0 | 0          | 0          | 0 | 5 | 0          | 1.60515106 |
| chr9 | 99373477  | 99443439  | 69963  | 1  | 0 | 0 | 0          | 0          | 0 | 4 | 0          | 1.26272838 |
| chr9 | 99443439  | 99479475  | 36037  | 2  | 0 | 0 | 0.01091641 | 0          | 0 | 4 | 0          | 0.76005302 |
| chr9 | 99479475  | 99524233  | 44759  | 2  | 0 | 1 | 0          | 0.00478973 | 0 | 5 | 0          | 1.02643191 |
| chr9 | 99524233  | 99583447  | 59215  | 2  | 1 | 1 | 0.30102999 | 0.00478973 | 0 | 5 | 0          | 1.02643191 |
| chr9 | 99583447  | 99583506  | 60     | 1  | 1 | 3 | 0.30102999 | 0.05670724 | 0 | 5 | 0          | 0.45545077 |
| chr9 | 99583506  | 99640257  | 56752  | 1  | 0 | 3 | 0          | 0.05670724 | 0 | 5 | 0          | 0.45545077 |
| chr9 | 99640257  | 99723609  | 83553  | 1  | 0 | 2 | 0          | 0.02162467 | 0 | 5 | 0          | 0.68214471 |
| chr9 | 99723609  | 99954624  | 231016 | 6  | 1 | 2 | 0.30102999 | 0.01053319 | 0 | 6 | 0          | 0.91219088 |
| chr9 | 99954624  | 100147447 | 192824 | 5  | 1 | 3 | 0.30102999 | 0.03070643 | 0 | 6 | 0          | 0.63695542 |
| chr9 | 100147447 | 100222949 | 75503  | 3  | 1 | 4 | 0.30102999 | 0.06713722 | 0 | 6 | 0          | 0.44141547 |
| chr9 | 100222949 | 100340699 | 117751 | 2  | 1 | 3 | 0.30102999 | 0.03070643 | 0 | 6 | 0          | 0.63695542 |
| chr9 | 100340699 | 100340758 | 60     | 1  | 1 | 4 | 0.30102999 | 0.06713722 | 0 | 6 | 0          | 0.44141547 |
| chr9 | 100340758 | 100368484 | 27727  | 2  | 1 | 3 | 0.30102999 | 0.03070643 | 0 | 6 | 0          | 0.63695542 |
| chr9 | 100368484 | 100368543 | 60     | 1  | 1 | 4 | 0.30102999 | 0.06713722 | 0 | 6 | 0          | 0.44141547 |
| chr9 | 100368543 | 100506926 | 138384 | 4  | 0 | 3 | 0          | 0.03070643 | 0 | 6 | 0          | 0.63695542 |
| chr9 | 100506926 | 100618226 | 111301 | 3  | 0 | 4 | 0          | 0.06713722 | 0 | 6 | 0          | 0.44141547 |
| chr9 | 100618226 | 100702830 | 84605  | 0  | 0 | 2 | 0          | 0.02162467 | 0 | 5 | 0          | 0.68214471 |
| chr9 | 100702830 | 100702889 | 60     | 1  | 0 | 4 | 0          | 0.06713722 | 0 | 6 | 0          | 0.44141547 |
| chr9 | 100702889 | 100880177 | 177289 | 5  | 0 | 3 | 0          | 0.03070643 | 0 | 6 | 0          | 0.63695542 |
| chr9 | 100880177 | 100880236 | 60     | 1  | 0 | 5 | 0          | 0.12309572 | 0 | 6 | 0          | 0.30102999 |
| chr9 | 100880236 | 100922724 | 42489  | 2  | 0 | 3 | 0          | 0.03070643 | 0 | 6 | 0          | 0.63695542 |
| chr9 | 100922724 | 100966794 | 44071  | 2  | 0 | 4 | 0          | 0.06713722 | 0 | 6 | 0          | 0.44141547 |
| chr9 | 100966794 | 100966853 | 60     | 1  | 1 | 4 | 0.30102999 | 0.06713722 | 0 | 6 | 0          | 0.44141547 |
| chr9 | 100966853 | 101052229 | 85377  | 2  | 0 | 4 | 0          | 0.06713722 | 0 | 6 | 0          | 0.44141547 |
| chr9 | 101052229 | 101103733 | 51505  | 0  | 1 | 3 | 0          | 0.03070643 | 0 | 6 | 0          | 0.63695542 |
| chr9 | 101103733 | 101366913 | 263181 | 6  | 1 | 3 | 0.30102999 | 0.03070643 | 0 | 6 | 0          | 0.63695542 |
| chr9 | 101366913 | 101366972 | 60     | 1  | 1 | 4 | 0.30102999 | 0.06713722 | 0 | 6 | 0          | 0.44141547 |
| chr9 | 101366972 | 101513362 | 146391 | 2  | 0 | 0 | 0          | 0.06713722 | 0 | 6 | 0          | 0.44141547 |
| chr9 | 101513362 | 101547430 | 34069  | 1  | 0 | 3 | 0          | 0.03070643 | 0 | 6 | 0          | 0.63695542 |
| chr9 | 101547430 | 101577905 | 30476  | 2  | 1 | 3 | 0.30102999 | 0.03070643 | 0 | 6 | 0          | 0.63695542 |
| chr9 | 101577905 | 101612063 | 34159  | 1  | 0 | 3 | 0          | 0.03070643 | 0 | 6 | 0          | 0.63695542 |
| chr9 | 101612063 | 101833091 | 221029 | 6  | 0 | 4 | 0          | 0.06713722 | 0 | 6 | 0          | 0.44141547 |
| chr9 | 101833091 | 101891260 | 58170  | 2  | 0 | 4 | 0          | 0.11390336 | 0 | 5 | 0          | 0.30102999 |
| chr9 | 101891260 | 101891315 | 56     | 1  | 0 | 4 | 0          | 0.06713722 | 0 | 6 | 0          | 0.44141547 |
| chr9 | 101891315 | 101940944 | 49630  | 2  | 0 | 4 | 0          | 0.11390336 | 0 | 5 | 0          | 0.30102999 |
| chr9 | 101940944 | 101982997 | 42054  | 2  | 0 | 5 | 0          | 0.19510895 | 0 | 5 | 0          | 0.19510895 |
| chr9 | 101982997 | 101988398 | 5402   | 2  | 1 | 5 | 0.30102999 | 0.19510895 | 0 | 5 | 0          | 0.19510895 |
| chr9 | 101988398 | 101989757 | 1360   | 1  | 1 | 4 | 0.30102999 | 0.11390336 | 0 | 5 | 0          | 0.30102999 |
| chr9 | 101989757 | 101989816 | 60     | 1  | 1 | 4 | 0.30102999 | 0.06713722 | 0 | 6 | 0          | 0.44141547 |
| chr9 | 101989816 | 102042279 | 52464  | 1  | 0 | 4 | 0          | 0.06713722 | 0 | 6 | 0          | 0.44141547 |
| chr9 | 102042279 | 102112257 | 69979  | 2  | 0 | 5 | 0          | 0.12309572 | 0 | 6 | 0          | 0.30102999 |
| chr9 | 102112257 | 102227981 | 115725 | 1  | 0 | 5 | 0          | 0.19510895 | 0 | 5 | 0          | 0.19510895 |
| chr9 | 102227981 | 102472075 | 244095 | 2  | 0 | 5 | 0.30102999 | 0          | 0 | 4 | 0          | 0.11390336 |
| chr9 | 102472075 | 102589027 | 116953 | 2  | 0 | 3 | 0          | 0.17593012 | 0 | 3 | 0          | 0.17593012 |
| chr9 | 102589027 | 102596175 | 7149   | 2  | 0 | 4 | 0          | 0.11390336 | 0 | 5 | 0          | 0.30102999 |
| chr9 | 102596175 | 102627513 | 31339  | 2  | 0 | 4 | 0          | 0.18734596 | 0 | 4 | 0          | 0.18734596 |
| chr9 | 102627513 | 102669932 | 42420  | 2  | 0 | 4 | 0          | 0.11390336 | 0 | 5 | 0          | 0.30102999 |
| chr9 | 102669932 | 102867687 | 197756 | 4  | 0 | 3 | 0          | 0.10122019 | 0 | 4 | 0          | 0.30102999 |
| chr9 | 102867687 | 102867746 | 60     | 1  | 0 | 4 | 0          | 0.18734596 | 0 | 4 | 0          | 0.18734596 |
| chr9 | 102867746 | 102947123 | 79378  | 2  | 0 | 3 | 0          | 0.17593012 | 0 | 3 | 0          | 0.17593012 |
| chr9 | 102947123 | 103027144 | 80022  | 3  | 0 | 3 | 0          | 0.10122019 | 0 | 4 | 0          | 0.30102999 |
| chr9 | 103027144 | 103027203 | 60     | 1  | 0 | 3 | 0          | 0.05670724 | 0 | 5 | 0          | 0.45545077 |
| chr9 | 103027203 | 103070825 | 43623  | 1  | 0 | 3 | 0          | 0.10122019 | 0 | 4 | 0          | 0.30102999 |
| chr9 | 103070825 | 103135416 | 64592  | 2  | 0 | 3 | 0          | 0.05670724 | 0 | 5 | 0          | 0.45545077 |
| chr9 | 103135416 | 103231512 | 96097  | 4  | 0 | 4 | 0          | 0.11390336 | 0 | 5 | 0          | 0.30102999 |
| chr9 | 103231512 | 103607071 | 375560 | 6  | 0 | 5 | 0          | 0.19510895 | 0 | 5 | 0          | 0.19510895 |
| chr9 | 103607071 | 103728118 | 121048 | 1  | 0 | 3 | 0          | 0.05670724 | 0 | 5 | 0          | 0.45545077 |
| chr9 | 103728118 | 103827939 | 99822  | 2  | 0 | 2 | 0          | 0.02162467 | 0 | 5 | 0          | 0.68214471 |
| chr9 | 103827939 | 103995306 | 167388 | 4  | 0 | 3 | 0          | 0.05670724 | 0 | 5 | 0          | 0.45545077 |
| chr9 | 103995306 | 104032248 | 36943  | 2  | 0 | 4 | 0          | 0.11390336 | 0 | 5 | 0          | 0.30102999 |
| chr9 | 104032248 | 104131381 | 99134  | 2  | 0 | 2 | 0          | 0.02162467 | 0 | 5 | 0          | 0.68214471 |
| chr9 | 104131381 | 1041981   |        |    |   |   |            |            |   |   |            |            |

|      |           |           |        |    |   |   |            |            |   |   |            |            |
|------|-----------|-----------|--------|----|---|---|------------|------------|---|---|------------|------------|
| chr9 | 107026058 | 107062792 | 36735  | 2  | 0 | 4 | 0          | 0.11390336 | 1 | 5 | 0.30102999 | 0.30102999 |
| chr9 | 107062792 | 107156480 | 93689  | 1  | 0 | 4 | 0          | 0.18734596 | 1 | 4 | 0.30102999 | 0.18734596 |
| chr9 | 107156480 | 107293452 | 136973 | 2  | 0 | 4 | 0          | 0.18734596 | 0 | 4 | 0          | 0.18734596 |
| chr9 | 107293452 | 107293511 | 60     | 1  | 0 | 5 | 0          | 0.12309572 | 1 | 6 | 0.30102999 | 0.30102999 |
| chr9 | 107293511 | 107386168 | 92658  | 2  | 1 | 3 | 0          | 0.10122019 | 1 | 4 | 0.30102999 | 0.30102999 |
| chr9 | 107386168 | 107420201 | 34034  | 2  | 0 | 4 | 0          | 0.11390336 | 1 | 5 | 0.30102999 | 0.30102999 |
| chr9 | 107420201 | 107460164 | 39964  | 1  | 0 | 3 | 0          | 0.10122019 | 1 | 4 | 0.30102999 | 0.30102999 |
| chr9 | 107460164 | 107510848 | 50685  | 1  | 0 | 3 | 0          | 0.17593012 | 1 | 3 | 0.30102999 | 0.17593012 |
| chr9 | 107510848 | 107648702 | 137855 | 6  | 1 | 5 | 0          | 0.30102999 | 1 | 4 | 0.30102999 | 0.11390336 |
| chr9 | 107648702 | 107810022 | 161321 | 3  | 0 | 6 | 0          | 0.30102999 | 1 | 5 | 0.30102999 | 0.12309572 |
| chr9 | 107810022 | 108021895 | 211874 | 3  | 0 | 4 | 0          | 0.30102999 | 0 | 5 | 0          | 0.10122019 |
| chr9 | 108021895 | 108021954 | 60     | 1  | 0 | 5 | 0          | 0.45545077 | 0 | 3 | 0          | 0.05670724 |
| chr9 | 108021954 | 108118605 | 96652  | 2  | 0 | 3 | 0          | 0.17593012 | 0 | 3 | 0          | 0.17593012 |
| chr9 | 108118605 | 108197017 | 78413  | 2  | 0 | 5 | 0          | 0.45545077 | 0 | 3 | 0          | 0.05670724 |
| chr9 | 108197017 | 108197076 | 60     | 1  | 0 | 5 | 0          | 0.30102999 | 0 | 4 | 0          | 0.11390336 |
| chr9 | 108197076 | 108276411 | 79936  | 1  | 0 | 4 | 0          | 0.30102999 | 0 | 3 | 0          | 0.10122019 |
| chr9 | 108276411 | 108382256 | 105846 | 2  | 0 | 3 | 0          | 0.17593012 | 0 | 3 | 0          | 0.17593012 |
| chr9 | 108382256 | 108424804 | 42549  | 1  | 0 | 3 | 0          | 0.10122019 | 0 | 4 | 0          | 0.30102999 |
| chr9 | 108424804 | 108487745 | 62942  | 2  | 0 | 2 | 0          | 0.0429175  | 0 | 4 | 0          | 0.47744371 |
| chr9 | 108487745 | 108535449 | 47705  | 1  | 0 | 0 | 0          | 0          | 0 | 0 | 0          | 0.25272838 |
| chr9 | 108535449 | 108865371 | 32923  | 2  | 0 | 0 | 0          | 0          | 0 | 3 | 0          | 0.93173516 |
| chr9 | 108865371 | 108986615 | 121245 | 2  | 0 | 4 | 0          | 0.08289318 | 2 | 0 | 0          | 0.30102999 |
| chr9 | 108986615 | 109043854 | 57240  | 2  | 0 | 2 | 0          | 0.30102999 | 0 | 0 | 0          | 0.10122019 |
| chr9 | 109043854 | 109163320 | 119467 | 2  | 0 | 1 | 0          | 0.02438896 | 0 | 3 | 0          | 0.51676182 |
| chr9 | 109163320 | 109163379 | 60     | 1  | 0 | 2 | 0          | 0.08289318 | 0 | 0 | 0          | 0.30102999 |
| chr9 | 109163379 | 109621337 | 457959 | 5  | 0 | 1 | 0          | 0.05404976 | 0 | 2 | 0          | 0.30102999 |
| chr9 | 109621337 | 109653113 | 31777  | 2  | 0 | 2 | 0          | 0.1575501  | 0 | 0 | 0          | 0.1575501  |
| chr9 | 109653113 | 109737164 | 84052  | 2  | 0 | 1 | 0          | 0.05404976 | 0 | 2 | 0          | 0.30102999 |
| chr9 | 109737164 | 110046402 | 309239 | 5  | 0 | 0 | 0          | 0          | 0 | 0 | 0          | 0.61140001 |
| chr9 | 110046402 | 110093089 | 46688  | 2  | 0 | 1 | 0          | 0.02438896 | 0 | 3 | 0          | 0.51676182 |
| chr9 | 110093089 | 110273555 | 180467 | 3  | 0 | 1 | 0          | 0.05404976 | 0 | 2 | 0          | 0.30102999 |
| chr9 | 110273555 | 110317852 | 44298  | 2  | 0 | 1 | 0          | 0.02438896 | 0 | 0 | 0          | 0.51676182 |
| chr9 | 110317852 | 110672051 | 354200 | 4  | 0 | 1 | 0          | 0.05404976 | 0 | 0 | 0          | 0.30102999 |
| chr9 | 110672051 | 110861863 | 189813 | 3  | 0 | 1 | 0          | 0.02438896 | 0 | 3 | 0          | 0.51676182 |
| chr9 | 110861863 | 111047632 | 185770 | 2  | 0 | 2 | 0          | 0.02162467 | 0 | 5 | 0          | 0.68214471 |
| chr9 | 111047632 | 111047691 | 60     | 1  | 0 | 2 | 0          | 0.01053319 | 0 | 6 | 0          | 0.91219088 |
| chr9 | 111047691 | 111341780 | 294090 | 1  | 0 | 1 | 0          | 0.00204627 | 0 | 0 | 0          | 1.31360226 |
| chr9 | 111341780 | 111518840 | 177061 | 2  | 0 | 2 | 0          | 0.01053319 | 0 | 6 | 0          | 0.91219088 |
| chr9 | 111518840 | 111518899 | 60     | 1  | 1 | 3 | 0.30102999 | 0.03070643 | 0 | 0 | 0          | 0.63695542 |
| chr9 | 111518899 | 111672482 | 153584 | 4  | 0 | 0 | 0          | 0.03070643 | 0 | 6 | 0          | 0.63695542 |
| chr9 | 111672482 | 111754969 | 82488  | 5  | 1 | 3 | 0.30102999 | 0.03070643 | 0 | 6 | 0          | 0.63695542 |
| chr9 | 111754969 | 111868855 | 113887 | 5  | 0 | 1 | 0.30102999 | 0.01053319 | 0 | 6 | 0          | 0.91219088 |
| chr9 | 111868855 | 111868914 | 60     | 1  | 1 | 3 | 0.30102999 | 0.03070643 | 0 | 6 | 0          | 0.63695542 |
| chr9 | 111868914 | 111970294 | 101381 | 3  | 1 | 2 | 0.30102999 | 0.01053319 | 0 | 6 | 0          | 0.91219088 |
| chr9 | 111970294 | 111970351 | 58     | 1  | 2 | 3 | 0.61140001 | 0.03070643 | 0 | 6 | 0          | 0.63695542 |
| chr9 | 111970351 | 112258440 | 288090 | 6  | 2 | 2 | 0.61140001 | 0.01053319 | 0 | 6 | 0          | 0.91219088 |
| chr9 | 112258440 | 112482995 | 224556 | 5  | 2 | 2 | 0.30102999 | 0.01053319 | 0 | 6 | 0.05404976 | 0.91219088 |
| chr9 | 112482995 | 112483054 | 60     | 1  | 2 | 3 | 0.30102999 | 0.03070643 | 0 | 6 | 0.05404976 | 0.63695542 |
| chr9 | 112483054 | 112633360 | 150307 | 3  | 2 | 2 | 0.30102999 | 0.01053319 | 1 | 6 | 0.05404976 | 0.91219088 |
| chr9 | 112633360 | 112772526 | 139167 | 3  | 1 | 2 | 0.1218695  | 0.01053319 | 1 | 6 | 0.1218695  | 0.91219088 |
| chr9 | 112772526 | 112820649 | 48124  | 1  | 1 | 2 | 0.1218695  | 0.02162467 | 1 | 5 | 0.1218695  | 0.68214471 |
| chr9 | 112820649 | 112981516 | 160868 | 4  | 1 | 1 | 0.1218695  | 0.00478973 | 1 | 5 | 0.1218695  | 1.02643191 |
| chr9 | 112981516 | 113285506 | 303991 | 6  | 1 | 1 | 0.1218695  | 0.01091641 | 1 | 4 | 0.1218695  | 0.76005302 |
| chr9 | 113285506 | 113285565 | 60     | 1  | 1 | 2 | 0.1218695  | 0.0429175  | 1 | 4 | 0.1218695  | 0.47744371 |
| chr9 | 113285565 | 113327458 | 41894  | 1  | 1 | 2 | 0.30102999 | 0.0429175  | 0 | 4 | 0          | 0.47744371 |
| chr9 | 113327458 | 113366472 | 39015  | 2  | 1 | 2 | 0.30102999 | 0.02162467 | 0 | 5 | 0          | 0.68214471 |
| chr9 | 113366472 | 113431266 | 64795  | 1  | 1 | 1 | 0.30102999 | 0.00478973 | 0 | 5 | 0          | 1.02643191 |
| chr9 | 113431266 | 113562937 | 131672 | 3  | 0 | 1 | 0.30102999 | 0.00478973 | 0 | 5 | 0          | 1.02643191 |
| chr9 | 113562937 | 113562988 | 52     | 1  | 0 | 2 | 0          | 0.02162467 | 0 | 0 | 0          | 0.68214471 |
| chr9 | 113562988 | 113677240 | 114253 | 2  | 0 | 1 | 0          | 0.00478973 | 0 | 5 | 0          | 1.02643191 |
| chr9 | 113677240 | 113784710 | 107471 | 3  | 0 | 2 | 0          | 0.02162467 | 0 | 5 | 0          | 0.68214471 |
| chr9 | 113784710 | 113784769 | 60     | 1  | 0 | 2 | 0          | 0.01053319 | 0 | 6 | 0          | 0.91219088 |
| chr9 | 113784769 | 113860744 | 75976  | 2  | 0 | 2 | 0          | 0.08289318 | 0 | 3 | 0          | 0.30102999 |
| chr9 | 113860744 | 113919284 | 58541  | 1  | 0 | 1 | 0          | 0.05404976 | 0 | 2 | 0          | 0.30102999 |
| chr9 | 113919284 | 113948283 | 29002  | 2  | 0 | 1 | 0          | 0.02438896 | 0 | 3 | 0          | 0.51676182 |
| chr9 | 113948283 | 114061747 | 113463 | 1  | 0 | 1 | 0          | 0.05404976 | 0 | 2 | 0          | 0.30102999 |
| chr9 | 114061747 | 114147203 | 85557  | 2  | 0 | 1 | 0          | 0.02438896 | 0 | 3 | 0          | 0.51676182 |
| chr9 | 114147203 | 114147362 | 60     | 1  | 0 | 1 | 0          | 0.01091641 | 0 | 4 | 0          | 0.76005302 |
| chr9 | 114147362 | 114198483 | 51122  | 1  | 0 | 1 | 0          | 0.02438896 | 0 | 3 | 0          | 0.51676182 |
| chr9 | 114198483 | 114325417 | 126935 | 5  | 0 | 1 | 0          | 0.01091641 | 0 | 4 | 0          | 0.76005302 |
| chr9 | 114325417 | 114423267 | 97851  | 3  | 0 | 1 | 0          | 0.05404976 | 0 | 2 | 0          | 0.30102999 |
| chr9 | 114423267 | 114423325 | 59     | 1  | 1 | 1 | 0.30102999 | 0.02438896 | 0 | 0 | 0          | 0.51676182 |
| chr9 | 114423325 | 114472435 | 49111  | 1  | 1 | 1 | 0.30102999 | 0.1218695  | 0 | 1 | 0          | 0.1218695  |
| chr9 | 114472435 | 114538198 | 65764  | 2  | 1 | 0 | 0.30102999 | 0          | 0 | 0 | 0          | 0.30102999 |
| chr9 | 114538198 | 114661532 | 123335 | 3  | 1 | 1 | 0.30102999 | 0.1218695  | 0 | 1 | 0          | 0.1218695  |
| chr9 | 114661532 | 114661591 | 60     | 1  | 1 | 1 | 0.30102999 | 0.02438896 | 0 | 3 | 0          | 0.51676182 |
| chr9 | 114661591 | 114762420 | 100830 | 2  | 0 | 0 | 0          | 0          | 0 | 0 | 0          | 0.93173516 |
| chr9 | 114762420 | 114805946 | 43527  | 2  | 1 | 0 | 0.30102999 | 0          | 0 | 3 | 0          | 0.93173516 |
| chr9 | 114805946 | 115095046 | 289101 | 7  | 1 | 1 | 0.30102999 | 0.02438896 | 0 | 3 | 0          | 0.51676182 |
| chr9 | 115095046 | 115167877 | 72832  | 3  | 1 | 1 | 0.30102999 | 0.01091641 | 0 | 4 | 0          | 0.76005302 |
| chr9 | 115167877 | 115167936 | 60     | 1  | 1 | 1 | 0.30102999 | 0.00478973 | 0 | 5 | 0          | 1.02643191 |
| chr9 | 115167936 | 115252623 | 84688  | 2  | 1 | 1 | 0.30102999 | 0.01091641 | 0 | 4 | 0          | 0.76005302 |
| chr9 | 115252623 | 115449078 | 196456 | 4  | 0 | 1 | 0          | 0.01091641 | 0 | 4 | 0          | 0.76005302 |
| chr9 | 115449078 | 115522278 | 103201 | 4  | 0 | 1 | 0          | 0.00478973 | 0 | 5 | 0          | 1.02643191 |
| chr9 | 115522278 | 115747015 | 194738 | 5  | 0 | 0 | 0          | 0.02438896 | 0 | 0 | 0          | 0.51676182 |
| chr9 | 115747015 | 115808690 | 61676  | 2  | 0 | 1 | 0          | 0.01091641 | 0 | 4 | 0          | 0.76005302 |
| chr9 | 115808690 | 115925701 | 117012 | 2  | 0 | 0 | 0          | 0.00478973 | 0 | 5 | 0          | 1.02643191 |
| chr9 | 115925701 | 115925760 | 60     | 1  | 0 | 1 | 0          | 0.00204627 | 0 | 6 | 0          | 1.31360226 |
| chr9 | 115925760 | 116035393 | 109634 | 2  | 0 | 1 | 0          | 0.00478973 | 0 | 5 | 0          | 1.02643191 |
| chr9 | 116035393 | 116041198 | 5806   | 2  | 0 | 1 | 0          | 0.00204627 | 0 | 0 | 0          | 1.31360226 |
| chr9 | 116041198 | 116113079 | 71882  | 6  | 0 | 3 | 0          | 0.03070643 | 0 | 6 | 0          | 0.63695542 |
| chr9 | 116113079 | 116641235 | 528157 | 14 | 0 | 0 | 0          | 0.01598258 | 0 | 7 | 0          | 0.84395715 |
| chr9 | 116641235 | 116708691 | 67457  | 1  | 0 | 3 | 0          | 0.03070643 | 0 | 6 | 0          | 0.63695542 |
| chr9 | 116708691 | 116756926 | 48236  | 2  | 1 | 3 | 0.30102999 | 0.03070643 | 0 | 6 | 0          | 0.63695542 |
| chr9 | 116756926 | 116756983 | 58     | 1  | 1 | 3 | 0.30102999 | 0.01598258 | 0 | 7 | 0          | 0.84395715 |
| chr9 | 116756983 | 116792658 | 35676  | 1  | 1 | 3 | 0.30102999 | 0.03070643 | 0 | 6 | 0          | 0.63695542 |
| chr9 | 116792658 | 116859141 | 66484  | 2  | 0 | 0 | 0          | 0.03070643 | 0 | 6 | 0          | 0.63695542 |
| chr9 | 116859141 | 116859193 | 53     | 1  | 0 | 3 | 0          | 0.01598258 | 0 | 7 | 0          | 0.84395715 |
| chr9 | 116859193 | 116953141 | 93     |    |   |   |            |            |   |   |            |            |

|      |           |           |        |    |   |   |            |             |   |   |            |            |
|------|-----------|-----------|--------|----|---|---|------------|-------------|---|---|------------|------------|
| chr9 | 118206371 | 118529695 | 323235 | 3  | 0 | 3 | 0          | 0.51676182  | 1 | 1 | 0.30102999 | 0.02438896 |
| chr9 | 118529695 | 118529754 | 60     | 1  | 0 | 4 | 0          | 0.18734596  | 1 | 4 | 0.30102999 | 0.18734596 |
| chr9 | 118529754 | 118650708 | 120955 | 1  | 0 | 0 | 0          | 0.30102999  | 0 | 3 | 0          | 0.1012019  |
| chr9 | 118650708 | 118677120 | 26413  | 3  | 0 | 5 | 0          | 0.45545077  | 0 | 3 | 0          | 0.05670724 |
| chr9 | 118677120 | 118839359 | 162240 | 1  | 0 | 4 | 0          | 0.30102999  | 0 | 3 | 0          | 0.1012019  |
| chr9 | 118839359 | 118839418 | 60     | 1  | 0 | 4 | 0          | 0.18734596  | 1 | 4 | 0.30102999 | 0.18734596 |
| chr9 | 118839418 | 119059513 | 220096 | 3  | 0 | 4 | 0          | 0.30102999  | 0 | 3 | 0          | 0.1012019  |
| chr9 | 119059513 | 119127934 | 68422  | 3  | 0 | 5 | 0          | 0.45545077  | 0 | 3 | 0          | 0.05670724 |
| chr9 | 119127934 | 119187479 | 59546  | 5  | 0 | 5 | 0          | 0.19510895  | 0 | 5 | 0          | 0.19510895 |
| chr9 | 119187479 | 119380611 | 193133 | 4  | 0 | 5 | 0          | 0.12309572  | 0 | 6 | 0          | 0.30102999 |
| chr9 | 119380611 | 119419472 | 38862  | 2  | 0 | 5 | 0          | 0.07511598  | 0 | 7 | 0          | 0.43181735 |
| chr9 | 119419472 | 119457998 | 38527  | 4  | 0 | 5 | 0          | 0.04407651  | 0 | 8 | 0          | 0.58747015 |
| chr9 | 119457998 | 119576527 | 118530 | 2  | 0 | 5 | 0          | 0.07511598  | 0 | 7 | 0          | 0.43181735 |
| chr9 | 119576527 | 120086013 | 509487 | 10 | 0 | 5 | 0          | 0.04407651  | 0 | 8 | 0          | 0.58747015 |
| chr9 | 120086013 | 120120407 | 34395  | 1  | 0 | 4 | 0          | 0.02074938  | 0 | 8 | 0          | 0.79906872 |
| chr9 | 120120407 | 120296568 | 176162 | 2  | 0 | 3 | 0          | 0.0079614   | 0 | 8 | 0          | 1.07548421 |
| chr9 | 120296568 | 120435101 | 138534 | 1  | 0 | 2 | 0          | 0.00493743  | 0 | 7 | 0          | 1.16581773 |
| chr9 | 120435101 | 120708959 | 273859 | 4  | 0 | 4 | 0          | 0.01053319  | 0 | 6 | 0          | 0.91219088 |
| chr9 | 120708959 | 120709018 | 60     | 1  | 0 | 2 | 0          | 0.06713722  | 0 | 6 | 0          | 0.44141547 |
| chr9 | 120709018 | 121139703 | 430686 | 3  | 0 | 3 | 0          | 0.03070643  | 0 | 6 | 0          | 0.63695542 |
| chr9 | 121139703 | 121432168 | 292466 | 2  | 0 | 6 | 0          | 0.01053319  | 0 | 6 | 0          | 0.91219088 |
| chr9 | 121432168 | 121432227 | 60     | 1  | 0 | 3 | 0          | 0.015398258 | 0 | 7 | 0          | 0.84395715 |
| chr9 | 121432227 | 121540083 | 107857 | 1  | 0 | 2 | 0          | 0.01053319  | 0 | 6 | 0          | 0.91219088 |
| chr9 | 121540083 | 121672929 | 132847 | 2  | 0 | 2 | 0          | 0.00493743  | 0 | 7 | 0          | 1.16581773 |
| chr9 | 121672929 | 121929223 | 256294 | 2  | 0 | 1 | 0          | 0.00204627  | 0 | 6 | 0          | 1.31360226 |
| chr9 | 121929223 | 122004122 | 74901  | 1  | 0 | 1 | 0          | 0.01091641  | 0 | 4 | 0          | 0.76005302 |
| chr9 | 122004122 | 122115885 | 111764 | 4  | 0 | 2 | 0          | 0.0429175   | 0 | 4 | 0          | 0.47744371 |
| chr9 | 122115885 | 122159398 | 43514  | 2  | 0 | 2 | 0          | 0.02162467  | 0 | 5 | 0          | 0.68214471 |
| chr9 | 122159398 | 122159457 | 60     | 1  | 0 | 2 | 0          | 0.01053319  | 0 | 6 | 0          | 0.91219088 |
| chr9 | 122159457 | 122361030 | 201574 | 2  | 0 | 2 | 0          | 0.0429175   | 0 | 4 | 0          | 0.47744371 |
| chr9 | 122361030 | 122547094 | 186065 | 2  | 0 | 2 | 0          | 0.00493743  | 0 | 7 | 0          | 1.16581773 |
| chr9 | 122547094 | 122547153 | 60     | 1  | 0 | 3 | 0          | 0.01598258  | 0 | 7 | 0          | 0.84395715 |
| chr9 | 122547153 | 122762080 | 214928 | 2  | 0 | 2 | 0          | 0.00493743  | 0 | 7 | 0          | 1.16581773 |
| chr9 | 122762080 | 122762139 | 60     | 1  | 0 | 2 | 0          | 0.00221948  | 0 | 8 | 0          | 1.44210395 |
| chr9 | 122762139 | 122905740 | 143602 | 1  | 0 | 2 | 0          | 0.00493743  | 0 | 7 | 0          | 1.16581773 |
| chr9 | 122905740 | 123010959 | 105220 | 2  | 0 | 2 | 0          | 0.01053319  | 0 | 6 | 0          | 0.91219088 |
| chr9 | 123010959 | 123088173 | 77215  | 2  | 0 | 2 | 0          | 0.00493743  | 0 | 7 | 0          | 1.16581773 |
| chr9 | 123088173 | 123088232 | 60     | 1  | 1 | 2 | 0.30102999 | 0.00493743  | 0 | 7 | 0          | 1.16581773 |
| chr9 | 123088232 | 123182061 | 93830  | 3  | 0 | 2 | 0          | 0.01053319  | 0 | 6 | 0          | 0.91219088 |
| chr9 | 123182061 | 123182120 | 60     | 1  | 1 | 2 | 0.30102999 | 0.01053319  | 0 | 6 | 0          | 0.91219088 |
| chr9 | 123182120 | 123341444 | 159325 | 3  | 0 | 2 | 0          | 0.01053319  | 0 | 6 | 0          | 0.91219088 |
| chr9 | 123341444 | 123341503 | 60     | 1  | 0 | 2 | 0          | 0.00493743  | 0 | 7 | 0          | 1.16581773 |
| chr9 | 123341503 | 123414289 | 72787  | 2  | 0 | 2 | 0          | 0.02162467  | 0 | 5 | 0          | 0.68214471 |
| chr9 | 123414289 | 123414348 | 60     | 1  | 1 | 2 | 0.30102999 | 0.02162467  | 0 | 5 | 0          | 0.68214471 |
| chr9 | 123414348 | 123546488 | 132141 | 3  | 0 | 2 | 0          | 0.02162467  | 0 | 5 | 0          | 0.68214471 |
| chr9 | 123546488 | 123550447 | 3960   | 2  | 0 | 2 | 0          | 0.01053319  | 0 | 6 | 0          | 0.91219088 |
| chr9 | 123550447 | 123636598 | 86152  | 3  | 0 | 2 | 0          | 0.00493743  | 0 | 7 | 0          | 1.16581773 |
| chr9 | 123636598 | 123860664 | 224067 | 8  | 0 | 7 | 0          | 0.00493743  | 1 | 7 | 0.30102999 | 1.16581773 |
| chr9 | 123860664 | 124001726 | 141063 | 5  | 0 | 2 | 0          | 0.00221948  | 0 | 8 | 0.30102999 | 1.44210395 |
| chr9 | 124001726 | 124291196 | 289471 | 9  | 0 | 2 | 0          | 0.00221948  | 2 | 8 | 0.61140001 | 1.44210395 |
| chr9 | 124291196 | 124423026 | 131831 | 2  | 0 | 2 | 0          | 0.00493743  | 2 | 7 | 0.61140001 | 1.16581773 |
| chr9 | 124423026 | 124423085 | 60     | 1  | 2 | 2 | 0          | 0.00221948  | 2 | 8 | 0.61140001 | 1.44210395 |
| chr9 | 124423085 | 124584365 | 161281 | 4  | 0 | 2 | 0          | 0.00493743  | 2 | 7 | 0.61140001 | 1.16581773 |
| chr9 | 124584365 | 124628147 | 43783  | 1  | 0 | 2 | 0          | 0.00493743  | 1 | 7 | 0.30102999 | 1.16581773 |
| chr9 | 124628147 | 124628206 | 60     | 1  | 0 | 2 | 0          | 0.00221948  | 8 | 8 | 0.30102999 | 1.44210395 |
| chr9 | 124628206 | 124664562 | 36357  | 1  | 0 | 2 | 0          | 0.00493743  | 1 | 7 | 0.30102999 | 1.16581773 |
| chr9 | 124664562 | 124918446 | 253885 | 7  | 0 | 2 | 0          | 0.00493743  | 2 | 7 | 0.61140001 | 1.16581773 |
| chr9 | 124918446 | 124918505 | 60     | 1  | 0 | 3 | 0          | 0.0079614   | 2 | 8 | 0.61140001 | 1.07548421 |
| chr9 | 124918505 | 124977052 | 58548  | 2  | 0 | 2 | 0          | 0.00493743  | 2 | 7 | 0.61140001 | 1.16581773 |
| chr9 | 124977052 | 125042127 | 65076  | 3  | 0 | 3 | 0          | 0.01598258  | 2 | 7 | 0.61140001 | 0.84395715 |
| chr9 | 125042127 | 125151302 | 109176 | 3  | 0 | 3 | 0          | 0.01598258  | 1 | 7 | 0.30102999 | 0.84395715 |
| chr9 | 125151302 | 125228887 | 77586  | 3  | 0 | 3 | 0          | 0.0079614   | 1 | 8 | 0.30102999 | 1.07548421 |
| chr9 | 125228887 | 125330788 | 101902 | 2  | 0 | 3 | 0          | 0.01598258  | 1 | 7 | 0.30102999 | 0.84395715 |
| chr9 | 125330788 | 125376609 | 45822  | 2  | 0 | 3 | 0          | 0.0079614   | 1 | 8 | 0.30102999 | 1.07548421 |
| chr9 | 125376609 | 125520006 | 143398 | 2  | 0 | 4 | 0          | 0.03070643  | 1 | 6 | 0.30102999 | 0.63695542 |
| chr9 | 125520006 | 125782637 | 252632 | 10 | 1 | 3 | 0          | 0.06713722  | 1 | 6 | 0.30102999 | 0.44141547 |
| chr9 | 125782637 | 125815519 | 32883  | 2  | 0 | 4 | 0          | 0.11398326  | 1 | 5 | 0.30102999 | 0.30102999 |
| chr9 | 125815519 | 126072907 | 212389 | 9  | 0 | 4 | 0          | 0.06713722  | 1 | 6 | 0.30102999 | 0.44141547 |
| chr9 | 126072907 | 126202182 | 174276 | 4  | 1 | 3 | 0          | 0.03070643  | 1 | 6 | 0.30102999 | 0.63695542 |
| chr9 | 126202182 | 126270264 | 68083  | 2  | 0 | 3 | 0          | 0.03070643  | 0 | 6 | 0          | 0.63695542 |
| chr9 | 126270264 | 126370323 | 60     | 1  | 0 | 3 | 0          | 0.03070643  | 1 | 6 | 0.30102999 | 0.63695542 |
| chr9 | 126370323 | 126340823 | 70501  | 1  | 0 | 3 | 0          | 0.03070643  | 0 | 6 | 0          | 0.63695542 |
| chr9 | 126340823 | 126370587 | 29765  | 2  | 0 | 4 | 0          | 0.06713722  | 0 | 6 | 0          | 0.44141547 |
| chr9 | 126370587 | 126480075 | 109489 | 2  | 0 | 3 | 0          | 0.03070643  | 0 | 6 | 0          | 0.63695542 |
| chr9 | 126480075 | 126480134 | 60     | 1  | 0 | 4 | 0          | 0.03812622  | 0 | 7 | 0          | 0.60763643 |
| chr9 | 126480134 | 126598579 | 118446 | 3  | 0 | 3 | 0          | 0.01598258  | 0 | 6 | 0          | 0.84395715 |
| chr9 | 126598579 | 126723048 | 124470 | 2  | 0 | 2 | 0          | 0.01053319  | 0 | 6 | 0          | 0.91219088 |
| chr9 | 126723048 | 126780380 | 57333  | 2  | 1 | 2 | 0.30102999 | 0.01053319  | 0 | 6 | 0          | 0.91219088 |
| chr9 | 126780380 | 126795325 | 14946  | 3  | 0 | 2 | 0.30102999 | 0.00493743  | 0 | 7 | 0          | 1.16581773 |
| chr9 | 126795325 | 127019350 | 224026 | 2  | 1 | 2 | 0.30102999 | 0.02162467  | 0 | 6 | 0          | 0.68214471 |
| chr9 | 127019350 | 127023652 | 4303   | 2  | 1 | 3 | 0.30102999 | 0.03070643  | 0 | 6 | 0          | 0.63695542 |
| chr9 | 127023652 | 127130392 | 106741 | 2  | 1 | 2 | 0.30102999 | 0.01053319  | 0 | 6 | 0          | 0.91219088 |
| chr9 | 127130392 | 127130451 | 60     | 1  | 1 | 3 | 0.30102999 | 0.03070643  | 0 | 6 | 0          | 0.63695542 |
| chr9 | 127130451 | 127254078 | 132628 | 3  | 1 | 3 | 0.30102999 | 0.05670724  | 0 | 5 | 0          | 0.45545077 |
| chr9 | 127254078 | 127254125 | 48     | 1  | 3 | 3 | 0.30102999 | 0.01598258  | 0 | 7 | 0          | 0.84395715 |
| chr9 | 127254125 | 127319305 | 65181  | 3  | 1 | 3 | 0.30102999 | 0.03070643  | 0 | 6 | 0          | 0.63695542 |
| chr9 | 127319305 | 127707232 | 387928 | 13 | 1 | 3 | 0.30102999 | 0.01598258  | 0 | 7 | 0          | 0.84395715 |
| chr9 | 127707232 | 127749171 | 41940  | 1  | 1 | 3 | 0.30102999 | 0.05670724  | 0 | 5 | 0          | 0.45545077 |
| chr9 | 127749171 | 127818144 | 68974  | 2  | 1 | 3 | 0.30102999 | 0.10122019  | 0 | 4 | 0          | 0.30102999 |
| chr9 | 127818144 | 127867709 | 49566  | 2  | 1 | 3 | 0.30102999 | 0.05670724  | 0 | 5 | 0          | 0.45545077 |
| chr9 | 127867709 | 128464047 | 596339 | 16 | 1 | 3 | 0.30102999 | 0.10122019  | 0 | 4 | 0          | 0.30102999 |
| chr9 | 128464047 | 128464106 | 60     | 1  | 1 | 3 | 0.30102999 | 0.05670724  | 0 | 5 | 0          | 0.45545077 |
| chr9 | 128464106 | 128557214 | 93109  | 3  | 1 | 3 | 0.30102999 | 0.0102999   | 0 | 2 | 0          | 0.08289318 |
| chr9 | 128557214 | 128557273 | 60     | 1  | 1 | 3 | 0.30102999 | 0.17593012  | 0 | 3 | 0          | 0.17593012 |
| chr9 | 128557273 | 128640000 | 82728  | 2  | 1 | 3 | 0.30102999 | 0.0102999   | 0 | 2 | 0          | 0.08289318 |
| chr9 | 128640000 | 128652844 | 12845  | 2  | 1 | 3 | 0.30102999 | 0.10122019  | 0 | 4 | 0          | 0.30102999 |
| chr9 | 128652844 | 128689438 | 36595  | 2  | 1 | 3 | 0.30102999 | 0.0102999   | 0 | 2 | 0          | 0.08289318 |
| chr9 | 128689438 | 128689497 | 60     | 1  | 1 | 3 | 0.30102999 | 0.10122019  | 0 |   |            |            |

|      |           |           |        |    |   |   |            |            |   |    |            |            |
|------|-----------|-----------|--------|----|---|---|------------|------------|---|----|------------|------------|
| chr9 | 130533364 | 130596070 | 62707  | 3  | 0 | 5 | 0          | 0.00666883 | 0 | 11 | 0          | 1.20557689 |
| chr9 | 130596070 | 130699312 | 103243 | 7  | 0 | 5 | 0          | 0.00317045 | 1 | 12 | 0.30102999 | 1.46403142 |
| chr9 | 130699312 | 130735438 | 36127  | 3  | 0 | 6 | 0          | 0.00778066 | 1 | 12 | 0.30102999 | 1.17038931 |
| chr9 | 130735438 | 130825542 | 90105  | 1  | 0 | 6 | 0          | 0.02793176 | 1 | 10 | 0.30102999 | 0.74627054 |
| chr9 | 130825542 | 130886800 | 61259  | 2  | 1 | 6 | 0.1218695  | 0.02793176 | 1 | 10 | 0.1218695  | 0.74627054 |
| chr9 | 130886800 | 130923464 | 36665  | 2  | 1 | 7 | 0.1218695  | 0.03037338 | 1 | 11 | 0.1218695  | 0.73110763 |
| chr9 | 130923464 | 130985100 | 61637  | 2  | 2 | 7 | 0.30102999 | 0.03037338 | 1 | 11 | 0.05404976 | 0.73110763 |
| chr9 | 130985100 | 131090997 | 105898 | 5  | 1 | 6 | 0.1218695  | 0.01518174 | 1 | 11 | 0.1218695  | 0.9449689  |
| chr9 | 131090997 | 131271757 | 180761 | 10 | 2 | 7 | 0.30102999 | 0.03037338 | 1 | 11 | 0.05404976 | 0.73110763 |
| chr9 | 131271757 | 131306786 | 35030  | 1  | 2 | 6 | 0.30102999 | 0.01518174 | 1 | 11 | 0.05404976 | 0.9449689  |
| chr9 | 131306786 | 131395721 | 88936  | 3  | 2 | 5 | 0.30102999 | 0.00666883 | 1 | 11 | 0.05404976 | 1.20557689 |
| chr9 | 131395721 | 131416330 | 20610  | 2  | 2 | 6 | 0.30102999 | 0.01518174 | 1 | 11 | 0.05404976 | 0.9449689  |
| chr9 | 131416330 | 131485931 | 69602  | 5  | 2 | 7 | 0.30102999 | 0.03037338 | 1 | 11 | 0.05404976 | 0.73110763 |
| chr9 | 131485931 | 131503843 | 17913  | 1  | 2 | 6 | 0.30102999 | 0.01518174 | 1 | 11 | 0.05404976 | 0.9449689  |
| chr9 | 131503843 | 131525429 | 21587  | 2  | 2 | 6 | 0.1575501  | 0.01518174 | 2 | 11 | 0.1575501  | 0.9449689  |
| chr9 | 131525429 | 131551269 | 25841  | 1  | 2 | 6 | 0.1575501  | 0.02793176 | 2 | 10 | 0.1575501  | 0.74627054 |
| chr9 | 131551269 | 131633235 | 81967  | 5  | 2 | 6 | 0.30102999 | 0.02793176 | 1 | 10 | 0.05404976 | 0.74627054 |
| chr9 | 131633235 | 131689374 | 56140  | 2  | 2 | 6 | 0.30102999 | 0.01518174 | 1 | 11 | 0.05404976 | 0.9449689  |
| chr9 | 131689374 | 131689418 | 45     | 1  | 2 | 7 | 0.30102999 | 0.03037338 | 1 | 11 | 0.05404976 | 0.73110763 |
| chr9 | 131689418 | 131708122 | 18705  | 2  | 1 | 7 | 0.1218695  | 0.03037338 | 1 | 11 | 0.1218695  | 0.73110763 |
| chr9 | 131708122 | 131708179 | 58     | 1  | 2 | 7 | 0.30102999 | 0.03037338 | 1 | 11 | 0.05404976 | 0.73110763 |
| chr9 | 131708179 | 131824464 | 116286 | 4  | 1 | 6 | 0.1218695  | 0.02793176 | 1 | 10 | 0.1218695  | 0.74627054 |
| chr9 | 131824464 | 131824523 | 60     | 1  | 2 | 6 | 0.30102999 | 0.01518174 | 1 | 11 | 0.05404976 | 0.9449689  |
| chr9 | 131824523 | 131852122 | 27600  | 3  | 2 | 6 | 0.30102999 | 0.02793176 | 1 | 10 | 0.05404976 | 0.74627054 |
| chr9 | 131852122 | 131867543 | 15422  | 1  | 1 | 6 | 0.1218695  | 0.02793176 | 1 | 10 | 0.1218695  | 0.74627054 |
| chr9 | 131867543 | 131899913 | 32371  | 2  | 1 | 6 | 0.1218695  | 0.01518174 | 1 | 11 | 0.1218695  | 0.9449689  |
| chr9 | 131899913 | 131899966 | 54     | 1  | 2 | 6 | 0.30102999 | 0.01518174 | 1 | 11 | 0.05404976 | 0.9449689  |
| chr9 | 131899966 | 131955293 | 55328  | 1  | 2 | 6 | 0.30102999 | 0.02793176 | 1 | 10 | 0.05404976 | 0.74627054 |
| chr9 | 131955293 | 131987266 | 31974  | 1  | 2 | 5 | 0.30102999 | 0.01320236 | 1 | 10 | 0.05404976 | 0.97390707 |
| chr9 | 131987266 | 131987325 | 60     | 1  | 2 | 6 | 0.30102999 | 0.02793176 | 1 | 10 | 0.05404976 | 0.74627054 |
| chr9 | 131987325 | 132043687 | 56363  | 1  | 1 | 6 | 0.1218695  | 0.04875589 | 1 | 9  | 0.1218695  | 0.5732208  |
| chr9 | 132043687 | 132091097 | 47411  | 1  | 1 | 5 | 0.1218695  | 0.02473314 | 1 | 9  | 0.1218695  | 0.76806864 |
| chr9 | 132091097 | 132091156 | 60     | 1  | 1 | 5 | 0.1218695  | 0.01320236 | 1 | 10 | 0.1218695  | 0.97390707 |
| chr9 | 132091156 | 132315993 | 224838 | 4  | 1 | 4 | 0.1218695  | 0.00530919 | 1 | 10 | 0.1218695  | 1.2568129  |
| chr9 | 132315993 | 132389432 | 73440  | 1  | 1 | 5 | 0.1218695  | 0.01320236 | 1 | 10 | 0.1218695  | 0.97390707 |
| chr9 | 132389432 | 132395475 | 6044   | 1  | 1 | 5 | 0.30102999 | 0.01320236 | 0 | 10 | 0          | 0.97390707 |
| chr9 | 132395475 | 132396763 | 1289   | 2  | 1 | 6 | 0.30102999 | 0.02793176 | 0 | 10 | 0          | 0.74627054 |
| chr9 | 132396763 | 132399197 | 2435   | 2  | 1 | 6 | 0.1218695  | 0.02793176 | 1 | 10 | 0.1218695  | 0.74627054 |
| chr9 | 132399197 | 132461752 | 62556  | 2  | 1 | 5 | 0.30102999 | 0.01320236 | 0 | 10 | 0          | 0.97390707 |
| chr9 | 132461752 | 132484969 | 23218  | 2  | 1 | 6 | 0.30102999 | 0.02793176 | 0 | 10 | 0          | 0.74627054 |
| chr9 | 132484969 | 132573552 | 88584  | 2  | 1 | 5 | 0.30102999 | 0.01320236 | 0 | 10 | 0          | 0.97390707 |
| chr9 | 132573552 | 132584673 | 11122  | 1  | 1 | 4 | 0.30102999 | 0.01077081 | 0 | 9  | 0          | 1.01542894 |
| chr9 | 132584673 | 132612490 | 27818  | 3  | 1 | 4 | 0.30102999 | 0.00530919 | 0 | 10 | 0          | 1.2568129  |
| chr9 | 132612490 | 132690322 | 77833  | 2  | 1 | 4 | 0.30102999 | 0.00247414 | 0 | 11 | 0          | 1.52371709 |
| chr9 | 132690322 | 132690381 | 60     | 1  | 1 | 5 | 0.30102999 | 0.00666883 | 0 | 11 | 0          | 1.20557689 |
| chr9 | 132690381 | 132755571 | 65191  | 1  | 1 | 4 | 0.30102999 | 0.00247414 | 0 | 11 | 0          | 1.52371709 |
| chr9 | 132755571 | 132755630 | 60     | 1  | 1 | 4 | 0.1218695  | 0.00247414 | 1 | 11 | 0.1218695  | 1.52371709 |
| chr9 | 132755630 | 132803682 | 48053  | 1  | 1 | 4 | 0.1218695  | 0.00530919 | 1 | 10 | 0.1218695  | 1.2568129  |
| chr9 | 132803682 | 132803741 | 60     | 1  | 1 | 5 | 0.1218695  | 0.00666883 | 1 | 11 | 0.1218695  | 1.20557689 |
| chr9 | 132803741 | 132863494 | 59754  | 2  | 1 | 4 | 0.30102999 | 0.00247414 | 0 | 11 | 0          | 1.52371709 |
| chr9 | 132863494 | 132902903 | 39410  | 1  | 1 | 4 | 0.30102999 | 0.00530919 | 0 | 10 | 0          | 1.2568129  |
| chr9 | 132902903 | 132995601 | 92699  | 2  | 1 | 4 | 0.30102999 | 0.01077081 | 0 | 9  | 0          | 1.01542894 |
| chr9 | 132995601 | 132995660 | 60     | 1  | 1 | 4 | 0.1218695  | 0.00530919 | 1 | 10 | 0.1218695  | 1.2568129  |
| chr9 | 132995660 | 133044416 | 48757  | 1  | 1 | 3 | 0.30102999 | 0.00170589 | 0 | 10 | 0          | 1.61091002 |
| chr9 | 133044416 | 133297198 | 252783 | 1  | 0 | 3 | 0          | 0.00170589 | 0 | 10 | 0          | 1.61091002 |
| chr9 | 133297198 | 133297257 | 60     | 1  | 0 | 7 | 0          | 0.05232577 | 0 | 10 | 0          | 0.56314362 |
| chr9 | 133297257 | 133376145 | 78889  | 2  | 0 | 5 | 0          | 0.04407651 | 0 | 8  | 0          | 0.58747015 |
| chr9 | 133376145 | 133376204 | 60     | 1  | 0 | 7 | 0          | 0.08584816 | 0 | 9  | 0          | 0.42015402 |
| chr9 | 133376204 | 133481689 | 105486 | 2  | 0 | 5 | 0          | 0.04407651 | 0 | 8  | 0          | 0.58747015 |
| chr9 | 133481689 | 133481748 | 60     | 1  | 0 | 5 | 0          | 0.04407651 | 0 | 8  | 0.30102999 | 0.58747015 |
| chr9 | 133481748 | 133548267 | 66520  | 1  | 0 | 4 | 0          | 0.03812622 | 0 | 7  | 0          | 0.60763643 |
| chr9 | 133548267 | 133590274 | 42008  | 4  | 0 | 5 | 0          | 0.07511598 | 0 | 7  | 0          | 0.43181735 |
| chr9 | 133590274 | 133590333 | 60     | 1  | 0 | 5 | 0          | 0.07511598 | 0 | 7  | 0.30102999 | 0.43181735 |
| chr9 | 133590333 | 133768611 | 178279 | 4  | 0 | 5 | 0          | 0.07511598 | 0 | 7  | 0          | 0.43181735 |
| chr9 | 133768611 | 133774868 | 6258   | 2  | 0 | 6 | 0          | 0.08122616 | 0 | 8  | 0          | 0.4250187  |
| chr9 | 133774868 | 133931680 | 156813 | 4  | 0 | 6 | 0          | 0.129913   | 0 | 7  | 0          | 0.30102999 |
| chr9 | 133931680 | 134053698 | 122019 | 4  | 0 | 4 | 0          | 0.03812622 | 0 | 7  | 0          | 0.60763643 |
| chr9 | 134053698 | 134104967 | 51270  | 3  | 0 | 6 | 0          | 0.129913   | 0 | 7  | 0          | 0.30102999 |
| chr9 | 134104967 | 134184586 | 79620  | 6  | 0 | 6 | 0          | 0.08122616 | 0 | 8  | 0          | 0.4250187  |
| chr9 | 134184586 | 134305643 | 121058 | 3  | 0 | 6 | 0          | 0.04875589 | 0 | 9  | 0          | 0.5732208  |
| chr9 | 134305643 | 134501267 | 185625 | 6  | 0 | 5 | 0          | 0.02473314 | 0 | 9  | 0          | 0.76806864 |
| chr9 | 134501267 | 134585960 | 149694 | 3  | 0 | 6 | 0          | 0.04875589 | 0 | 9  | 0          | 0.5732208  |
| chr9 | 134585960 | 134612145 | 26186  | 1  | 0 | 5 | 0          | 0.02473314 | 0 | 9  | 0          | 0.76806864 |
| chr9 | 134612145 | 134663883 | 51739  | 2  | 0 | 4 | 0          | 0.01320236 | 0 | 10 | 0          | 0.97390707 |
| chr9 | 134663883 | 134785337 | 121455 | 2  | 0 | 4 | 0          | 0.01077081 | 0 | 9  | 0          | 1.01542894 |
| chr9 | 134785337 | 134881700 | 96364  | 3  | 0 | 6 | 0          | 0.02793176 | 0 | 10 | 0          | 0.74627054 |
| chr9 | 134881700 | 135007324 | 125625 | 4  | 0 | 6 | 0          | 0.00778066 | 0 | 12 | 0          | 1.17038931 |
| chr9 | 135007324 | 135053804 | 46481  | 3  | 0 | 7 | 0          | 0.00859896 | 0 | 13 | 0          | 1.14735594 |
| chr9 | 135053804 | 135087840 | 34037  | 2  | 0 | 7 | 0          | 0.00413023 | 0 | 14 | 0          | 1.39918918 |
| chr9 | 135087840 | 135161840 | 74001  | 3  | 0 | 6 | 0          | 0.00373523 | 0 | 13 | 0          | 1.42397267 |
| chr9 | 135161840 | 135211814 | 49975  | 2  | 0 | 6 | 0          | 0.01518174 | 0 | 11 | 0          | 0.9449689  |
| chr9 | 135211814 | 135261940 | 50127  | 2  | 0 | 6 | 0          | 0.00778066 | 0 | 12 | 0          | 1.17038931 |
| chr9 | 135261940 | 135261999 | 60     | 1  | 0 | 6 | 0          | 0.00373523 | 0 | 13 | 0          | 1.42397267 |
| chr9 | 135261999 | 135380272 | 118274 | 3  | 0 | 6 | 0          | 0.00778066 | 0 | 12 | 0          | 1.17038931 |
| chr9 | 135380272 | 135380331 | 60     | 1  | 0 | 6 | 0          | 0.00166733 | 0 | 14 | 0          | 1.70763027 |
| chr9 | 135380331 | 135461246 | 80916  | 2  | 0 | 5 | 0          | 0.00317045 | 0 | 12 | 0          | 1.46403142 |
| chr9 | 135461246 | 135549768 | 88523  | 3  | 0 | 5 | 0          | 0.00141024 | 0 | 13 | 0          | 1.75065223 |
| chr9 | 135549768 | 135600047 | 50280  | 2  | 0 | 7 | 0          | 0.00859896 | 0 | 13 | 0          | 1.14735594 |
| chr9 | 135600047 | 135600104 | 58     | 1  | 0 | 8 | 0          | 0.01767679 | 0 | 13 | 0          | 0.91308053 |
| chr9 | 135600104 | 135763086 | 162983 | 5  | 0 | 8 | 0          | 0.03209037 | 0 | 12 | 0          | 0.72109894 |
| chr9 | 135763086 | 135787853 | 24768  | 3  | 0 | 8 | 0          | 0.01767679 | 0 | 13 | 0          | 0.91308053 |
| chr9 | 135787853 | 135813928 | 26076  | 1  | 0 | 8 | 0          | 0.03209037 | 0 | 12 | 0          | 0.72109894 |
| chr9 | 135813928 | 136036942 | 223015 | 8  | 0 | 7 | 0          | 0.01667721 | 0 | 12 | 0          | 0.92532268 |
| chr9 | 136036942 | 136137479 | 100538 | 2  | 0 | 6 | 0          | 0.00778066 | 0 | 12 | 0          | 1.17038931 |
| chr9 | 136137479 | 136137536 | 58     | 1  | 0 | 7 | 0          | 0.01667721 |   |    |            |            |

|       |           |           |        |    |    |   |            |            |    |    |            |            |
|-------|-----------|-----------|--------|----|----|---|------------|------------|----|----|------------|------------|
| chr9  | 138517845 | 138569148 | 51304  | 1  | 0  | 6 | 0          | 0.02793176 | 0  | 10 | 0          | 0.74627054 |
| chr9  | 138569148 | 138691533 | 122386 | 4  | 0  | 7 | 0          | 0.05232577 | 0  | 10 | 0          | 0.56314362 |
| chr9  | 138691533 | 138758222 | 66690  | 2  | 0  | 7 | 0          | 0.03037338 | 0  | 11 | 0          | 0.73110763 |
| chr9  | 138758222 | 138758281 | 60     | 1  | 0  | 7 | 0          | 0.0166721  | 0  | 12 | 0          | 0.9252268  |
| chr9  | 138758281 | 138824836 | 66556  | 1  | 0  | 6 | 0          | 0.04875589 | 0  | 9  | 0          | 0.5732208  |
| chr9  | 138824836 | 138880824 | 55989  | 3  | 1  | 7 | 0.30102999 | 0.08584816 | 0  | 9  | 0          | 0.42015402 |
| chr9  | 138880824 | 139088882 | 208059 | 5  | 1  | 7 | 0.1218695  | 0.08584816 | 1  | 9  | 0.1218695  | 0.42015402 |
| chr9  | 139088882 | 139088941 | 60     | 1  | 1  | 7 | 0.1218695  | 0.05232577 | 1  | 10 | 0.1218695  | 0.56314362 |
| chr9  | 139088941 | 139253928 | 164988 | 7  | 1  | 7 | 0.1218695  | 0.08584816 | 1  | 9  | 0.1218695  | 0.42015402 |
| chr9  | 139253928 | 139299672 | 45745  | 3  | 2  | 7 | 0.30102999 | 0.08584816 | 1  | 9  | 0.05404976 | 0.42015402 |
| chr9  | 139299672 | 139299731 | 60     | 1  | 2  | 7 | 0.30102999 | 0.05232577 | 1  | 10 | 0.05404976 | 0.56314362 |
| chr9  | 139299731 | 139362970 | 63240  | 3  | 2  | 7 | 0.30102999 | 0.08584816 | 1  | 9  | 0.05404976 | 0.42015402 |
| chr9  | 139362970 | 139363029 | 60     | 1  | 3  | 7 | 0.51676182 | 0.05232577 | 1  | 10 | 0.02438896 | 0.56314362 |
| chr9  | 139363029 | 139378050 | 15022  | 1  | 1  | 7 | 0.1218695  | 0.08584816 | 1  | 9  | 0.1218695  | 0.42015402 |
| chr9  | 139378050 | 139378107 | 58     | 1  | 2  | 7 | 0.30102999 | 0.08584816 | 1  | 9  | 0.05404976 | 0.42015402 |
| chr9  | 139378107 | 139432550 | 54444  | 2  | 1  | 6 | 0.1218695  | 0.04875589 | 1  | 9  | 0.1218695  | 0.5732208  |
| chr9  | 139432550 | 139432609 | 60     | 1  | 3  | 6 | 0.30102999 | 0.04875589 | 2  | 9  | 0.08289318 | 0.5732208  |
| chr9  | 139432609 | 139503031 | 70423  | 1  | 2  | 6 | 0.1575501  | 0.04875589 | 2  | 9  | 0.1575501  | 0.5732208  |
| chr9  | 139503031 | 139574425 | 71395  | 5  | 3  | 6 | 0.30102999 | 0.04875589 | 2  | 9  | 0.08289318 | 0.5732208  |
| chr9  | 139574425 | 139607528 | 33104  | 2  | 3  | 7 | 0.30102999 | 0.08584816 | 2  | 9  | 0.08289318 | 0.42015402 |
| chr9  | 139607528 | 139687162 | 79635  | 3  | 2  | 6 | 0.1575501  | 0.04875589 | 2  | 9  | 0.1575501  | 0.5732208  |
| chr9  | 139687162 | 139687722 | 561    | 2  | 2  | 6 | 0.30102999 | 0.08584816 | 2  | 9  | 0.08289318 | 0.42015402 |
| chr9  | 139687722 | 139722914 | 35193  | 2  | 2  | 6 | 0.1575501  | 0.04875589 | 2  | 9  | 0.1575501  | 0.5732208  |
| chr9  | 139722914 | 139882580 | 259667 | 8  | 3  | 7 | 0.30102999 | 0.08584816 | 2  | 9  | 0.08289318 | 0.42015402 |
| chr9  | 139882580 | 140087146 | 104567 | 5  | 4  | 7 | 0.47744371 | 0.05232577 | 2  | 10 | 0.0429175  | 0.56314362 |
| chr9  | 140087146 | 140110329 | 23184  | 2  | 4  | 7 | 0.47744371 | 0.08584816 | 2  | 9  | 0.0429175  | 0.42015402 |
| chr9  | 140110329 | 140110374 | 46     | 1  | 4  | 6 | 0.30102999 | 0.08584816 | 3  | 9  | 0.10122019 | 0.42015402 |
| chr9  | 140110374 | 140164421 | 54048  | 1  | 4  | 6 | 0.30102999 | 0.08122616 | 3  | 8  | 0.10122019 | 0.4250187  |
| chr9  | 140164421 | 140219048 | 54628  | 3  | 4  | 6 | 0.30102999 | 0.04875589 | 3  | 9  | 0.10122019 | 0.5732208  |
| chr9  | 140219048 | 140219107 | 60     | 1  | 4  | 7 | 0.30102999 | 0.05232577 | 3  | 10 | 0.10122019 | 0.56314362 |
| chr9  | 140219107 | 140287676 | 68570  | 1  | 4  | 6 | 0.30102999 | 0.04875589 | 3  | 9  | 0.10122019 | 0.5732208  |
| chr9  | 140287676 | 140378700 | 91025  | 2  | 4  | 5 | 0.30102999 | 0.02473314 | 3  | 9  | 0.10122019 | 0.76806864 |
| chr9  | 140378700 | 140378759 | 60     | 1  | 4  | 6 | 0.30102999 | 0.02793176 | 3  | 10 | 0.10122019 | 0.74627054 |
| chr9  | 140378759 | 140482538 | 103780 | 3  | 4  | 4 | 0.30102999 | 0.02074938 | 3  | 8  | 0.10122019 | 0.79906872 |
| chr9  | 140482538 | 140560792 | 78255  | 3  | 2  | 4 | 0.1575501  | 0.02074938 | 2  | 8  | 0.1575501  | 0.79906872 |
| chr9  | 140560792 | 140560851 | 60     | 1  | 2  | 4 | 0.08289318 | 0.01077081 | 3  | 9  | 0.30102999 | 1.01542894 |
| chr9  | 140560851 | 140590918 | 30068  | 1  | 3  | 3 | 0.08289318 | 0.0079614  | 3  | 8  | 0.30102999 | 1.07548421 |
| chr9  | 140590918 | 140590977 | 60     | 1  | 3  | 3 | 0.17593012 | 0.00378107 | 3  | 9  | 0.17593012 | 1.3311237  |
| chr9  | 140590977 | 140657526 | 66550  | 1  | 1  | 3 | 0.30102999 | 0.0079614  | 0  | 8  | 0          | 1.07548421 |
| chr9  | 140657526 | 140707451 | 49926  | 1  | 1  | 3 | 0.30102999 | 0.03070643 | 0  | 6  | 0          | 0.63695542 |
| chr9  | 140707451 | 140707504 | 54     | 1  | 2  | 3 | 0.61140001 | 0.03070643 | 0  | 6  | 0          | 0.63695542 |
| chr9  | 140707504 | 140785691 | 78188  | 2  | 1  | 3 | 0.30102999 | 0.03070643 | 0  | 6  | 0          | 0.63695542 |
| chr9  | 140785691 | 140878861 | 93171  | 2  | 1  | 2 | 0.30102999 | 0.02162467 | 0  | 5  | 0          | 0.68214471 |
| chr9  | 140878861 | 141008915 | 130055 | 1  | 0  | 1 | 0          | 0.00478973 | 0  | 5  | 0          | 1.02643191 |
| chr10 | 148206    | 148265    | 60     | 1  | 9  | 0 | 0.30102999 | 0          | 8  | 2  | 0.13872638 | 0.61140001 |
| chr10 | 148265    | 248464    | 100200 | 2  | 7  | 0 | 0.13499366 | 0          | 8  | 2  | 0.30102999 | 0.61140001 |
| chr10 | 248464    | 248523    | 60     | 1  | 8  | 0 | 0.20764654 | 0          | 8  | 2  | 0.20764654 | 0.61140001 |
| chr10 | 248523    | 314639    | 66117  | 1  | 7  | 0 | 0.13499366 | 0          | 8  | 2  | 0.30102999 | 0.61140001 |
| chr10 | 314639    | 314698    | 60     | 1  | 9  | 0 | 0.30102999 | 0          | 8  | 2  | 0.13872638 | 0.61140001 |
| chr10 | 314698    | 412075    | 97378  | 2  | 7  | 0 | 0.13499366 | 0          | 8  | 2  | 0.30102999 | 0.61140001 |
| chr10 | 412075    | 463007    | 50933  | 2  | 11 | 0 | 0.55623409 | 0          | 8  | 2  | 0.05490675 | 0.61140001 |
| chr10 | 463007    | 556875    | 93869  | 3  | 12 | 0 | 0.55190077 | 0          | 9  | 2  | 0.0558333  | 0.61140001 |
| chr10 | 556875    | 556934    | 60     | 1  | 12 | 0 | 0.41314172 | 0          | 10 | 2  | 0.09290028 | 0.61140001 |
| chr10 | 556934    | 728425    | 171492 | 3  | 11 | 0 | 0.30102999 | 0          | 10 | 2  | 0.14303407 | 0.61140001 |
| chr10 | 728425    | 873893    | 145469 | 4  | 13 | 0 | 0.5498098  | 0          | 10 | 2  | 0.0574087  | 0.61140001 |
| chr10 | 873893    | 972595    | 98703  | 2  | 12 | 0 | 0.41314172 | 0          | 10 | 2  | 0.09290028 | 0.61140001 |
| chr10 | 972595    | 1460405   | 487811 | 15 | 13 | 0 | 0.5498098  | 0          | 10 | 2  | 0.0574087  | 0.61140001 |
| chr10 | 1460405   | 1793817   | 333413 | 6  | 11 | 0 | 0.30102999 | 0          | 10 | 2  | 0.14303407 | 0.61140001 |
| chr10 | 1793817   | 2036190   | 242374 | 3  | 9  | 0 | 0.20975986 | 0          | 9  | 2  | 0.20975986 | 0.61140001 |
| chr10 | 2036190   | 2096163   | 59974  | 1  | 8  | 0 | 0.13499366 | 0          | 8  | 1  | 0.30102999 | 0.30102999 |
| chr10 | 2096163   | 2245932   | 14970  | 2  | 6  | 0 | 0.129913   | 0          | 7  | 1  | 0.30102999 | 0.30102999 |
| chr10 | 2245932   | 2318372   | 72441  | 2  | 8  | 0 | 0.20764654 | 0          | 8  | 2  | 0.20764654 | 0.61140001 |
| chr10 | 2318372   | 2318431   | 60     | 1  | 10 | 0 | 0.4167287  | 0          | 8  | 2  | 0.08923391 | 0.61140001 |
| chr10 | 2318431   | 2417549   | 99119  | 1  | 10 | 0 | 0.4167287  | 0          | 8  | 1  | 0.08923391 | 0.30102999 |
| chr10 | 2417549   | 2417608   | 60     | 1  | 11 | 0 | 0          | 0          | 9  | 1  | 0.09154957 | 0.30102999 |
| chr10 | 2417608   | 2692948   | 275341 | 3  | 6  | 0 | 0.41444892 | 0          | 8  | 0  | 0.41444892 | 0          |
| chr10 | 2692948   | 2693007   | 60     | 1  | 8  | 0 | 0.08122616 | 0          | 8  | 0  | 0.4250187  | 0          |
| chr10 | 2693007   | 2921442   | 228436 | 3  | 6  | 0 | 0.08122616 | 0          | 8  | 0  | 0.4250187  | 0          |
| chr10 | 2921442   | 3000869   | 79428  | 2  | 8  | 0 | 0.08923391 | 0          | 10 | 1  | 0.4167287  | 0.30102999 |
| chr10 | 3000869   | 3124061   | 123193 | 3  | 8  | 0 | 0.05490675 | 0          | 11 | 1  | 0.55623409 | 0.30102999 |
| chr10 | 3124061   | 3124120   | 60     | 1  | 9  | 0 | 0.09154957 | 0          | 11 | 1  | 0.41444892 | 0.30102999 |
| chr10 | 3124120   | 3177933   | 53814  | 1  | 8  | 0 | 0.05490675 | 0          | 11 | 1  | 0.55623409 | 0.30102999 |
| chr10 | 3177933   | 3178802   | 870    | 2  | 10 | 0 | 0.14303407 | 0          | 11 | 1  | 0.30102999 | 0.30102999 |
| chr10 | 3178802   | 3233421   | 54620  | 6  | 11 | 0 | 0.21200206 | 0          | 11 | 1  | 0.21200206 | 0.30102999 |
| chr10 | 3233421   | 3335606   | 102186 | 1  | 10 | 0 | 0.14303407 | 0          | 11 | 0  | 0.30102999 | 0          |
| chr10 | 3335606   | 3335665   | 60     | 1  | 10 | 0 | 0.09290028 | 0          | 12 | 0  | 0.41314172 | 0          |
| chr10 | 3335665   | 3469802   | 134138 | 2  | 8  | 0 | 0.03209037 | 0          | 12 | 0  | 0.72109894 | 0          |
| chr10 | 3469802   | 3691660   | 221859 | 4  | 11 | 0 | 0.14385241 | 0          | 12 | 0  | 0.30102999 | 0          |
| chr10 | 3691660   | 3735020   | 43361  | 2  | 13 | 0 | 0.30102999 | 0          | 12 | 0  | 0.14385241 | 0          |
| chr10 | 3735020   | 3735079   | 60     | 1  | 14 | 0 | 0.41314172 | 0          | 12 | 0  | 0.09290028 | 0          |
| chr10 | 3735079   | 3821288   | 86210  | 1  | 11 | 0 | 0.14385241 | 0          | 12 | 0  | 0.30102999 | 0          |
| chr10 | 3821288   | 3823295   | 2008   | 3  | 11 | 0 | 0.14385241 | 0          | 12 | 1  | 0.30102999 | 0.30102999 |
| chr10 | 3823295   | 3935490   | 112196 | 2  | 11 | 0 | 0.14385241 | 0          | 12 | 0  | 0.30102999 | 0          |
| chr10 | 3935490   | 3935549   | 60     | 1  | 14 | 0 | 0.41314172 | 0          | 12 | 1  | 0.09290028 | 0.30102999 |
| chr10 | 3935549   | 4049156   | 113608 | 1  | 12 | 0 | 0.21227046 | 0          | 12 | 1  | 0.21227046 | 0.30102999 |
| chr10 | 4049156   | 4049215   | 60     | 1  | 12 | 0 | 0.14385241 | 0          | 13 | 1  | 0.30102999 | 0.30102999 |
| chr10 | 4049215   | 4093817   | 44603  | 1  | 12 | 0 | 0.21227046 | 0          | 12 | 0  | 0.21227046 | 0          |
| chr10 | 4093817   | 4133446   | 39630  | 2  | 14 | 0 | 0.41314172 | 0          | 12 | 0  | 0.09290028 | 0          |
| chr10 | 4133446   | 4133505   | 60     | 1  | 14 | 0 | 0.30102999 | 0          | 13 | 0  | 0.14303407 | 0          |
| chr10 | 4133505   | 4318888   | 185384 | 2  | 13 | 0 | 0.21200206 | 0          | 13 | 0  | 0.21200206 | 0          |
| chr10 | 4318888   | 4318947   | 60     | 1  | 13 | 0 | 0.14303407 | 0          | 14 | 1  | 0.30102999 | 0.30102999 |
| chr10 | 4318947   | 4396320   | 77374  | 1  | 13 | 0 | 0.21200206 | 0          | 13 | 0  | 0.21200206 | 0          |
| chr10 | 4396320   | 4459570   | 63251  | 1  | 12 | 0 | 0.14385241 | 0          | 13 | 0  | 0.30102999 | 0          |
| chr10 | 4459570   | 4584377   | 124808 | 3  | 12 | 0 | 0.14385241 | 0          | 13 | 1  | 0.30102999 | 0.30102999 |
| chr10 | 4584377   | 4667016   | 82640  | 2  | 14 | 0 | 0.21118145 | 0          | 14 | 1  | 0.21118145 | 0.30102999 |
| chr10 | 4667016   | 4823143   | 1      |    |    |   |            |            |    |    |            |            |



|       |          |          |        |   |    |   |            |   |    |   |            |            |
|-------|----------|----------|--------|---|----|---|------------|---|----|---|------------|------------|
| chr10 | 6449112  | 6600019  | 150908 | 4 | 13 | 0 | 0.14303407 | 0 | 14 | 2 | 0.30102999 | 0.61140001 |
| chr10 | 6600019  | 6633590  | 33572  | 1 | 13 | 0 | 0.21200206 | 0 | 13 | 2 | 0.21200206 | 0.61140001 |
| chr10 | 6633590  | 7002284  | 368695 | 6 | 14 | 0 | 0.30102999 | 0 | 13 | 2 | 0.14303407 | 0.61140001 |
| chr10 | 7002284  | 7002343  | 60     | 1 | 15 | 0 | 0.41444892 | 0 | 13 | 2 | 0.09154957 | 0.61140001 |
| chr10 | 7002343  | 7069636  | 67294  | 1 | 14 | 0 | 0.30102999 | 0 | 13 | 2 | 0.14303407 | 0.61140001 |
| chr10 | 7069636  | 7131652  | 62017  | 1 | 13 | 0 | 0.21200206 | 0 | 13 | 2 | 0.21200206 | 0.61140001 |
| chr10 | 7131652  | 7131711  | 60     | 1 | 14 | 0 | 0.30102999 | 0 | 13 | 2 | 0.14303407 | 0.61140001 |
| chr10 | 7131711  | 7250691  | 118981 | 2 | 12 | 0 | 0.14385241 | 0 | 13 | 2 | 0.30102999 | 0.61140001 |
| chr10 | 7250691  | 7250750  | 60     | 1 | 14 | 0 | 0.30102999 | 0 | 13 | 2 | 0.14303407 | 0.61140001 |
| chr10 | 7250750  | 7351799  | 101050 | 2 | 12 | 0 | 0.14385241 | 0 | 13 | 2 | 0.30102999 | 0.61140001 |
| chr10 | 7351799  | 7386119  | 34321  | 2 | 13 | 0 | 0.21200206 | 0 | 13 | 2 | 0.21200206 | 0.61140001 |
| chr10 | 7386119  | 7416722  | 30604  | 2 | 14 | 0 | 0.30102999 | 0 | 13 | 2 | 0.14303407 | 0.61140001 |
| chr10 | 7416722  | 7470791  | 54070  | 1 | 13 | 0 | 0.21200206 | 0 | 13 | 2 | 0.21200206 | 0.61140001 |
| chr10 | 7470791  | 7565181  | 94391  | 1 | 12 | 0 | 0.14385241 | 0 | 13 | 2 | 0.30102999 | 0.61140001 |
| chr10 | 7565181  | 7565240  | 60     | 1 | 13 | 0 | 0.21200206 | 0 | 13 | 2 | 0.21200206 | 0.61140001 |
| chr10 | 7565240  | 7627978  | 62739  | 5 | 11 | 0 | 0.09334429 | 0 | 13 | 2 | 0.41271556 | 0.61140001 |
| chr10 | 7627978  | 7722648  | 94671  | 2 | 11 | 0 | 0.14385241 | 0 | 12 | 2 | 0.30102999 | 0.61140001 |
| chr10 | 7722648  | 7772056  | 49409  | 2 | 12 | 0 | 0.21200206 | 0 | 13 | 2 | 0.30102999 | 0.61140001 |
| chr10 | 7772056  | 7814191  | 42136  | 4 | 10 | 0 | 0.0574087  | 0 | 13 | 2 | 0.5498098  | 0.61140001 |
| chr10 | 7814191  | 7881298  | 77108  | 2 | 10 | 0 | 0.0574087  | 0 | 13 | 1 | 0.5498098  | 0.30102999 |
| chr10 | 7881298  | 7934635  | 43338  | 2 | 10 | 0 | 0.0574087  | 0 | 13 | 2 | 0.5498098  | 0.61140001 |
| chr10 | 7934635  | 8116694  | 182050 | 1 | 11 | 0 | 0.09334429 | 0 | 13 | 2 | 0.41271556 | 0.61140001 |
| chr10 | 8116694  | 8215858  | 99175  | 1 | 9  | 0 | 0.0313093  | 0 | 13 | 1 | 0.7158971  | 0.30102999 |
| chr10 | 8215858  | 8588248  | 372391 | 2 | 7  | 0 | 0.05232577 | 0 | 10 | 1 | 0.56314362 | 0.30102999 |
| chr10 | 8588248  | 8588307  | 60     | 1 | 7  | 0 | 0.03037338 | 0 | 11 | 1 | 0.73110763 | 0.30102999 |
| chr10 | 8588307  | 8683328  | 95022  | 1 | 6  | 0 | 0.02793176 | 0 | 10 | 1 | 0.74627054 | 0.30102999 |
| chr10 | 8683328  | 8774576  | 91249  | 1 | 5  | 0 | 0.02473314 | 0 | 9  | 1 | 0.76806864 | 0.30102999 |
| chr10 | 8774576  | 8994869  | 220294 | 1 | 5  | 0 | 0.07511598 | 0 | 7  | 1 | 0.43181735 | 0.30102999 |
| chr10 | 8994869  | 9190795  | 195927 | 1 | 2  | 0 | 0.0429175  | 0 | 4  | 0 | 0.47744371 | 0          |
| chr10 | 9190795  | 9352537  | 161743 | 2 | 3  | 0 | 0.01022019 | 0 | 4  | 0 | 0.30102999 | 0          |
| chr10 | 9352537  | 9513006  | 160470 | 1 | 2  | 0 | 0.0429175  | 0 | 4  | 0 | 0.47744371 | 0          |
| chr10 | 9513006  | 9645787  | 132782 | 1 | 1  | 0 | 0.01091641 | 0 | 4  | 0 | 0.76005302 | 0          |
| chr10 | 9645787  | 9846907  | 60     | 1 | 3  | 0 | 0.05670724 | 0 | 5  | 0 | 0.45545077 | 0          |
| chr10 | 9846907  | 10047084 | 200178 | 1 | 3  | 0 | 0.10122019 | 0 | 4  | 0 | 0.30102999 | 0          |
| chr10 | 10047084 | 10221742 | 174659 | 1 | 2  | 0 | 0.0429175  | 0 | 4  | 0 | 0.47744371 | 0          |
| chr10 | 10221742 | 10221801 | 60     | 1 | 5  | 0 | 0.04407651 | 0 | 8  | 0 | 0.58747015 | 0          |
| chr10 | 10221801 | 10358905 | 137105 | 1 | 5  | 0 | 0.07511598 | 0 | 7  | 0 | 0.43181735 | 0          |
| chr10 | 10358905 | 10358964 | 60     | 1 | 6  | 0 | 0.08122616 | 0 | 8  | 0 | 0.4250187  | 0          |
| chr10 | 10358964 | 10797860 | 438897 | 2 | 5  | 0 | 0.04407651 | 0 | 8  | 0 | 0.58747015 | 0          |
| chr10 | 10797860 | 10844699 | 46840  | 2 | 6  | 0 | 0.02793176 | 0 | 10 | 0 | 0.74627054 | 0          |
| chr10 | 10844699 | 11091335 | 246637 | 2 | 6  | 0 | 0.04875589 | 0 | 9  | 0 | 0.5732208  | 0          |
| chr10 | 11091335 | 11371351 | 280017 | 9 | 6  | 0 | 0.02793176 | 0 | 10 | 0 | 0.74627054 | 0          |
| chr10 | 11371351 | 11576958 | 205608 | 5 | 6  | 0 | 0.01518174 | 0 | 11 | 0 | 0.9449689  | 0          |
| chr10 | 11576958 | 11611794 | 34837  | 2 | 9  | 0 | 0.0565833  | 0 | 12 | 0 | 0.55190077 | 0          |
| chr10 | 11611794 | 11722207 | 110414 | 2 | 8  | 0 | 0.03209037 | 0 | 12 | 0 | 0.72109894 | 0          |
| chr10 | 11722207 | 11722266 | 60     | 1 | 9  | 0 | 0.0565833  | 0 | 12 | 0 | 0.55190077 | 0          |
| chr10 | 11722266 | 11794942 | 72677  | 3 | 9  | 0 | 0.09154957 | 0 | 11 | 0 | 0.41444892 | 0          |
| chr10 | 11794942 | 11895834 | 100893 | 2 | 8  | 0 | 0.05490675 | 0 | 11 | 0 | 0.55623409 | 0          |
| chr10 | 11895834 | 12114557 | 218724 | 6 | 9  | 0 | 0.09154957 | 0 | 11 | 0 | 0.41444892 | 0          |
| chr10 | 12114557 | 12114616 | 60     | 1 | 11 | 0 | 0.21200206 | 0 | 11 | 0 | 0.21200206 | 0          |
| chr10 | 12114616 | 12228207 | 113592 | 5 | 10 | 0 | 0.14303407 | 0 | 11 | 0 | 0.30102999 | 0          |
| chr10 | 12228207 | 12280441 | 52235  | 3 | 13 | 0 | 0.41271556 | 0 | 11 | 0 | 0.09334429 | 0          |
| chr10 | 12280441 | 12280500 | 60     | 1 | 14 | 0 | 0.5498098  | 0 | 11 | 0 | 0.0574087  | 0          |
| chr10 | 12280500 | 12446689 | 166190 | 3 | 12 | 0 | 0.30102999 | 0 | 11 | 0 | 0.14385241 | 0          |
| chr10 | 12446689 | 12512466 | 65778  | 1 | 11 | 0 | 0.21200206 | 0 | 11 | 0 | 0.21200206 | 0          |
| chr10 | 12512466 | 12539603 | 27138  | 1 | 10 | 0 | 0.14303407 | 0 | 11 | 0 | 0.30102999 | 0          |
| chr10 | 12539603 | 12613843 | 74241  | 2 | 10 | 0 | 0.14303407 | 0 | 11 | 1 | 0.30102999 | 0.30102999 |
| chr10 | 12613843 | 12706318 | 92476  | 3 | 11 | 0 | 0.21200206 | 0 | 11 | 1 | 0.21200206 | 0.30102999 |
| chr10 | 12706318 | 12766606 | 60289  | 1 | 10 | 0 | 0.14303407 | 0 | 11 | 1 | 0.30102999 | 0.30102999 |
| chr10 | 12766606 | 12857914 | 91309  | 2 | 10 | 0 | 0.21118145 | 0 | 10 | 0 | 0.21118145 | 0          |
| chr10 | 12857914 | 13001474 | 143561 | 4 | 10 | 0 | 0.14303407 | 0 | 11 | 0 | 0.30102999 | 0          |
| chr10 | 13001474 | 13160865 | 159392 | 4 | 15 | 0 | 0.55190077 | 0 | 12 | 0 | 0.0565833  | 0          |
| chr10 | 13160865 | 13160924 | 60     | 1 | 15 | 0 | 0.41444892 | 0 | 13 | 0 | 0.09154957 | 0          |
| chr10 | 13160924 | 13251149 | 90226  | 3 | 14 | 0 | 0.41314172 | 0 | 12 | 0 | 0.09290028 | 0          |
| chr10 | 13251149 | 13251208 | 60     | 1 | 14 | 0 | 0.21118145 | 0 | 14 | 0 | 0.21118145 | 0          |
| chr10 | 13251208 | 13271658 | 20451  | 1 | 14 | 0 | 0.30102999 | 0 | 13 | 0 | 0.43030909 | 0          |
| chr10 | 13271658 | 13336604 | 64947  | 1 | 14 | 0 | 0.41314172 | 0 | 12 | 0 | 0.09290028 | 0          |
| chr10 | 13336604 | 13380327 | 43724  | 1 | 13 | 0 | 0.30102999 | 0 | 12 | 0 | 0.14385241 | 0          |
| chr10 | 13380327 | 13483445 | 103119 | 1 | 13 | 0 | 0.41271556 | 0 | 11 | 0 | 0.09334429 | 0          |
| chr10 | 13483445 | 13642272 | 158828 | 4 | 12 | 0 | 0.30102999 | 0 | 11 | 0 | 0.14385241 | 0          |
| chr10 | 13642272 | 13773041 | 130770 | 4 | 13 | 0 | 0.41271556 | 0 | 11 | 0 | 0.09334429 | 0          |
| chr10 | 13773041 | 13880015 | 106975 | 3 | 13 | 0 | 0.30102999 | 0 | 12 | 0 | 0.14385241 | 0          |
| chr10 | 13880015 | 13904118 | 24104  | 2 | 13 | 0 | 0.21200206 | 0 | 13 | 0 | 0.21200206 | 0          |
| chr10 | 13904118 | 13904177 | 60     | 1 | 13 | 0 | 0.09154957 | 0 | 15 | 0 | 0.41444892 | 0          |
| chr10 | 13904177 | 14050271 | 146095 | 3 | 13 | 0 | 0.14303407 | 0 | 14 | 0 | 0.30102999 | 0          |
| chr10 | 14050271 | 14050330 | 60     | 1 | 14 | 0 | 0.21118145 | 0 | 14 | 0 | 0.21118145 | 0          |
| chr10 | 14050330 | 14108879 | 58550  | 1 | 14 | 0 | 0.41314172 | 0 | 12 | 0 | 0.09290028 | 0          |
| chr10 | 14108879 | 14158802 | 49924  | 2 | 14 | 0 | 0.30102999 | 0 | 13 | 0 | 0.14303407 | 0          |
| chr10 | 14158802 | 14268036 | 109235 | 2 | 13 | 0 | 0.30102999 | 0 | 12 | 0 | 0.14385241 | 0          |
| chr10 | 14268036 | 14329017 | 60982  | 2 | 14 | 0 | 0.30102999 | 0 | 13 | 0 | 0.14303407 | 0          |
| chr10 | 14329017 | 14372661 | 43645  | 1 | 14 | 0 | 0.41314172 | 0 | 12 | 0 | 0.09290028 | 0          |
| chr10 | 14372661 | 14496155 | 123495 | 3 | 13 | 0 | 0.30102999 | 0 | 12 | 0 | 0.14385241 | 0          |
| chr10 | 14496155 | 14496214 | 60     | 1 | 13 | 0 | 0.21200206 | 0 | 13 | 0 | 0.21200206 | 0          |
| chr10 | 14496214 | 14635361 | 139148 | 2 | 13 | 0 | 0.41271556 | 0 | 11 | 0 | 0.09334429 | 0          |
| chr10 | 14635361 | 14724086 | 88726  | 2 | 13 | 0 | 0.5498098  | 0 | 10 | 0 | 0.0574087  | 0          |
| chr10 | 14724086 | 14778772 | 54687  | 1 | 12 | 0 | 0.41314172 | 0 | 10 | 0 | 0.09290028 | 0          |
| chr10 | 14778772 | 14869993 | 91222  | 3 | 12 | 0 | 0.30102999 | 0 | 11 | 0 | 0.14385241 | 0          |
| chr10 | 14869993 | 15009438 | 139446 | 4 | 11 | 0 | 0.30102999 | 0 | 10 | 0 | 0.14303407 | 0          |
| chr10 | 15009438 | 15106486 | 97049  | 3 | 11 | 0 | 0.30102999 | 0 | 10 | 1 | 0.14303407 | 0.30102999 |
| chr10 | 15106486 | 15150846 | 44361  | 4 | 10 | 0 | 0.21118145 | 0 | 10 | 1 | 0.21118145 | 0.30102999 |
| chr10 | 15150846 | 15415335 | 264490 | 7 | 9  | 0 | 0.14135546 | 0 | 10 | 1 | 0.30102999 | 0.30102999 |
| chr10 | 15415335 | 15504365 | 89031  | 1 | 7  | 0 | 0.05232577 | 0 | 10 | 1 | 0.56314362 | 0.30102999 |
| chr10 | 15504365 | 15728129 | 223765 | 6 | 8  | 0 | 0.08923391 | 0 | 10 | 1 | 0.4167287  | 0.30102999 |
| chr10 | 15728129 | 15824162 | 96034  | 2 | 6  | 0 | 0.02793176 | 0 | 10 | 1 | 0.74627054 | 0.30102999 |
| chr10 | 15824162 | 15975054 | 150893 | 3 | 8  | 0 | 0.08923391 | 0 | 10 | 1 | 0.4167287  | 0.30102999 |
| chr10 | 15975054 | 15975113 | 60     | 1 | 9  | 0 | 0.14135546 | 0 | 10 | 1 | 0.30102999 | 0.30102999 |
| chr10 | 15975113 | 16042161 | 67049  | 1 | 9  | 0 | 0.14135546 | 0 | 10 | 0 | 0.30102999 | 0          |
| chr10 | 16042161 | 16151160 | 109000 | 1 | 7  | 0 | 0.05232577 | 0 | 10 | 0 | 0.56314362 | 0          |
| chr10 | 16151160 | 16300979 | 149820 | 1 | 6  | 0 | 0.02793176 | 0 | 10 |   |            |            |

|       |          |          |        |   |    |   |            |   |    |   |            |            |
|-------|----------|----------|--------|---|----|---|------------|---|----|---|------------|------------|
| chr10 | 18515359 | 18549858 | 34500  | 2 | 3  | 0 | 0.00170589 | 0 | 10 | 0 | 1.61091002 | 0          |
| chr10 | 18549858 | 18618376 | 68519  | 1 | 3  | 0 | 2.93E-04   | 0 | 12 | 0 | 2.24559516 | 0          |
| chr10 | 18618376 | 18652192 | 33817  | 3 | 3  | 0 | 7.28E-04   | 0 | 11 | 0 | 1.91540774 | 0          |
| chr10 | 18652192 | 18699314 | 47123  | 2 | 3  | 0 | 0.00170589 | 0 | 10 | 0 | 1.61091002 | 0          |
| chr10 | 18699314 | 18699373 | 60     | 1 | 3  | 0 | 2.93E-04   | 0 | 12 | 0 | 2.24559516 | 0          |
| chr10 | 18699373 | 18949530 | 250158 | 5 | 3  | 0 | 0.00378107 | 0 | 9  | 0 | 1.33111237 | 0          |
| chr10 | 18949530 | 19010007 | 60478  | 3 | 3  | 0 | 0.00170589 | 0 | 10 | 0 | 1.61091002 | 0          |
| chr10 | 19010007 | 19252784 | 242778 | 2 | 3  | 0 | 0.0079614  | 0 | 8  | 0 | 1.07548421 | 0          |
| chr10 | 19252784 | 19346555 | 93772  | 2 | 3  | 0 | 0.00378107 | 0 | 9  | 0 | 1.33111237 | 0          |
| chr10 | 19346555 | 1936529  | 189975 | 3 | 3  | 0 | 7.28E-04   | 0 | 11 | 0 | 1.91540774 | 0          |
| chr10 | 1936529  | 19650514 | 113986 | 1 | 3  | 0 | 0.00170589 | 0 | 10 | 0 | 1.61091002 | 0          |
| chr10 | 19650514 | 19650573 | 60     | 1 | 3  | 0 | 7.28E-04   | 0 | 11 | 0 | 1.91540774 | 0          |
| chr10 | 19650573 | 19906612 | 256040 | 4 | 3  | 0 | 0.00378107 | 0 | 9  | 0 | 1.33111237 | 0          |
| chr10 | 19906612 | 20105838 | 199227 | 3 | 3  | 0 | 0.0079614  | 0 | 8  | 0 | 1.07548421 | 0          |
| chr10 | 20105838 | 20311068 | 205231 | 5 | 4  | 0 | 0.01077081 | 0 | 9  | 0 | 1.01542894 | 0          |
| chr10 | 20311068 | 20357071 | 46004  | 2 | 4  | 0 | 0.00108487 | 0 | 12 | 0 | 1.81706455 | 0          |
| chr10 | 20357071 | 20357130 | 60     | 1 | 4  | 0 | 0.00778066 | 0 | 12 | 0 | 1.17038931 | 0          |
| chr10 | 20357130 | 20506343 | 149214 | 3 | 4  | 0 | 0.00530919 | 0 | 10 | 0 | 1.2568129  | 0          |
| chr10 | 20506343 | 20506402 | 60     | 1 | 4  | 0 | 0.01518174 | 0 | 11 | 0 | 0.9449689  | 0          |
| chr10 | 20506402 | 20589017 | 82616  | 1 | 6  | 0 | 0.02393176 | 0 | 10 | 0 | 0.74627054 | 0          |
| chr10 | 20589017 | 20589076 | 60     | 1 | 6  | 0 | 0.01518174 | 0 | 11 | 0 | 0.9449689  | 0          |
| chr10 | 20589076 | 20695175 | 106100 | 1 | 6  | 0 | 0.00666883 | 0 | 11 | 0 | 1.20557689 | 0          |
| chr10 | 20695175 | 20825532 | 130358 | 2 | 6  | 0 | 0.01518174 | 0 | 11 | 0 | 0.9449689  | 0          |
| chr10 | 20825532 | 20825591 | 60     | 1 | 7  | 0 | 0.00859896 | 0 | 13 | 0 | 1.14735594 | 0          |
| chr10 | 20825591 | 21070477 | 244887 | 2 | 6  | 0 | 0.00778066 | 0 | 12 | 0 | 1.17038931 | 0          |
| chr10 | 21070477 | 21102908 | 32432  | 2 | 7  | 0 | 0.01667721 | 0 | 12 | 0 | 0.92532268 | 0          |
| chr10 | 21102908 | 21445496 | 342589 | 7 | 6  | 0 | 0.01518174 | 0 | 11 | 0 | 0.9449689  | 0          |
| chr10 | 21445496 | 21551827 | 106332 | 3 | 6  | 0 | 0.00778066 | 0 | 12 | 0 | 1.17038931 | 0          |
| chr10 | 21551827 | 21757087 | 205261 | 2 | 5  | 0 | 0.00317045 | 0 | 12 | 0 | 1.46403142 | 0          |
| chr10 | 21757087 | 21883121 | 126035 | 5 | 7  | 0 | 0.00859896 | 0 | 13 | 0 | 1.14735594 | 0          |
| chr10 | 21883121 | 22002747 | 119627 | 2 | 7  | 0 | 0.01667721 | 0 | 12 | 0 | 0.92532268 | 0          |
| chr10 | 22002747 | 22065396 | 62650  | 2 | 7  | 0 | 0.03037338 | 0 | 11 | 0 | 0.73110763 | 0          |
| chr10 | 22065396 | 22146175 | 80780  | 1 | 7  | 0 | 0.01667721 | 0 | 12 | 0 | 0.92532268 | 0          |
| chr10 | 22146175 | 22146234 | 60     | 1 | 7  | 0 | 0.00859896 | 0 | 13 | 0 | 1.14735594 | 0          |
| chr10 | 22146234 | 22217411 | 71178  | 1 | 7  | 0 | 0.01667721 | 0 | 12 | 0 | 0.92532268 | 0          |
| chr10 | 22217411 | 22217470 | 60     | 1 | 7  | 0 | 0.00859896 | 0 | 13 | 0 | 1.14735594 | 0          |
| chr10 | 22217470 | 22262394 | 44925  | 1 | 6  | 0 | 0.01518174 | 0 | 11 | 0 | 0.9449689  | 0          |
| chr10 | 22262394 | 22394622 | 132229 | 3 | 7  | 0 | 0.01667721 | 0 | 12 | 0 | 0.92532268 | 0          |
| chr10 | 22394622 | 22532652 | 138031 | 3 | 9  | 0 | 0.0331093  | 0 | 13 | 0 | 0.71538971 | 0          |
| chr10 | 22532652 | 22606298 | 73647  | 2 | 9  | 0 | 0.01817691 | 0 | 14 | 0 | 0.90719478 | 0          |
| chr10 | 22606298 | 22639692 | 33395  | 3 | 9  | 0 | 0.0331093  | 0 | 13 | 0 | 0.71538971 | 0          |
| chr10 | 22639692 | 22825792 | 186101 | 4 | 9  | 0 | 0.01817691 | 0 | 14 | 0 | 0.90719478 | 0          |
| chr10 | 22825792 | 22844450 | 18659  | 2 | 9  | 0 | 0.00926608 | 0 | 15 | 0 | 1.13004284 | 0          |
| chr10 | 22844450 | 22950715 | 106266 | 2 | 9  | 0 | 0.0331093  | 0 | 13 | 0 | 0.71538971 | 0          |
| chr10 | 22950715 | 22991713 | 40999  | 2 | 9  | 0 | 0.01817691 | 0 | 14 | 0 | 0.90719478 | 0          |
| chr10 | 22991713 | 23041802 | 50090  | 1 | 9  | 0 | 0.0565833  | 0 | 12 | 0 | 0.55190077 | 0          |
| chr10 | 23041802 | 23041861 | 60     | 1 | 10 | 0 | 0.09290028 | 0 | 12 | 0 | 0.41314172 | 0          |
| chr10 | 23041861 | 23089529 | 47669  | 1 | 10 | 0 | 0.14303407 | 0 | 11 | 0 | 0.30102999 | 0          |
| chr10 | 23089529 | 23089588 | 60     | 1 | 10 | 0 | 0.0574087  | 0 | 13 | 0 | 0.5498098  | 0          |
| chr10 | 23089588 | 23190112 | 100525 | 1 | 10 | 0 | 0.09290028 | 0 | 12 | 0 | 0.41314172 | 0          |
| chr10 | 23190112 | 23220899 | 30788  | 2 | 10 | 0 | 0.03344703 | 0 | 14 | 0 | 0.7153304  | 0          |
| chr10 | 23220899 | 23257288 | 36390  | 2 | 10 | 0 | 0.01817691 | 0 | 15 | 0 | 0.90719478 | 0          |
| chr10 | 23257288 | 23377491 | 120204 | 3 | 9  | 0 | 0.0331093  | 0 | 13 | 0 | 0.71538971 | 0          |
| chr10 | 23377491 | 23377550 | 60     | 1 | 10 | 0 | 0.0574087  | 0 | 13 | 0 | 0.5498098  | 0          |
| chr10 | 23377550 | 23409844 | 32295  | 1 | 9  | 0 | 0.0331093  | 0 | 13 | 0 | 0.71538971 | 0          |
| chr10 | 23409844 | 23447940 | 38097  | 2 | 9  | 0 | 0.00433294 | 0 | 16 | 0 | 1.3873209  | 0          |
| chr10 | 23447940 | 23553937 | 105998 | 3 | 7  | 0 | 0.00413023 | 0 | 14 | 0 | 1.39918918 | 0          |
| chr10 | 23553937 | 23609705 | 55769  | 2 | 9  | 0 | 0.00926608 | 0 | 15 | 0 | 1.13004284 | 0          |
| chr10 | 23609705 | 23617487 | 7783   | 2 | 9  | 0 | 0.00433294 | 0 | 16 | 0 | 1.3873209  | 0          |
| chr10 | 23617487 | 23678708 | 61222  | 2 | 10 | 0 | 0.0099834  | 0 | 16 | 0 | 1.13428373 | 0          |
| chr10 | 23678708 | 23678767 | 60     | 1 | 10 | 0 | 0.00413023 | 0 | 17 | 0 | 1.39918918 | 0          |
| chr10 | 23678767 | 23725958 | 47192  | 1 | 9  | 0 | 0.00433294 | 0 | 16 | 0 | 1.3873209  | 0          |
| chr10 | 23725958 | 23899594 | 173637 | 1 | 7  | 0 | 0.00183109 | 0 | 15 | 0 | 1.68336308 | 0          |
| chr10 | 23899594 | 24006390 | 106347 | 2 | 7  | 0 | 2.70E-04   | 0 | 17 | 0 | 2.36290411 | 0          |
| chr10 | 24006390 | 24063030 | 54451  | 3 | 7  | 0 | 8.69E-05   | 0 | 18 | 1 | 2.76830915 | 0.30102999 |
| chr10 | 24063030 | 24177159 | 116770 | 2 | 7  | 0 | 2.70E-04   | 0 | 17 | 1 | 2.36290411 | 0.30102999 |
| chr10 | 24177159 | 24283796 | 106638 | 3 | 8  | 0 | 2.57E-04   | 0 | 18 | 1 | 2.37589866 | 0.30102999 |
| chr10 | 24283796 | 24400329 | 116534 | 3 | 8  | 0 | 7.41E-04   | 0 | 17 | 0 | 2.00316618 | 0          |
| chr10 | 24400329 | 24526574 | 126246 | 3 | 8  | 0 | 0.00188727 | 0 | 16 | 0 | 1.67551277 | 0          |
| chr10 | 24526574 | 24562280 | 35707  | 2 | 7  | 0 | 0.00183109 | 0 | 15 | 0 | 1.68336308 | 0          |
| chr10 | 24562280 | 24604763 | 42484  | 3 | 7  | 0 | 7.41E-04   | 0 | 16 | 0 | 2.00316618 | 0          |
| chr10 | 24604763 | 24716756 | 111994 | 2 | 6  | 0 | 8.66E-04   | 0 | 15 | 0 | 2.02387299 | 0          |
| chr10 | 24716756 | 24716815 | 60     | 1 | 7  | 0 | 7.41E-04   | 0 | 16 | 0 | 2.00316618 | 0          |
| chr10 | 24716815 | 25089237 | 372423 | 7 | 6  | 0 | 2.57E-04   | 0 | 16 | 0 | 2.37589866 | 0          |
| chr10 | 25089237 | 25181647 | 92411  | 3 | 6  | 0 | 8.66E-04   | 0 | 15 | 0 | 2.02387299 | 0          |
| chr10 | 25181647 | 25279466 | 97820  | 2 | 6  | 0 | 0.00166733 | 0 | 14 | 0 | 1.70763027 | 0          |
| chr10 | 25279466 | 25482892 | 203427 | 5 | 6  | 0 | 2.57E-04   | 0 | 16 | 0 | 2.37589866 | 0          |
| chr10 | 25482892 | 25534772 | 51881  | 1 | 6  | 0 | 8.66E-04   | 0 | 15 | 0 | 2.02387299 | 0          |
| chr10 | 25534772 | 25578708 | 43937  | 1 | 6  | 0 | 0.00166733 | 0 | 14 | 0 | 1.70763027 | 0          |
| chr10 | 25578708 | 25697468 | 118761 | 2 | 6  | 0 | 0.00375233 | 0 | 13 | 0 | 1.42397267 | 0          |
| chr10 | 25697468 | 25735095 | 37628  | 1 | 6  | 0 | 0.01518174 | 0 | 11 | 0 | 0.9449689  | 0          |
| chr10 | 25735095 | 25773461 | 38367  | 1 | 5  | 0 | 0.01320236 | 0 | 10 | 0 | 0.97390707 | 0          |
| chr10 | 25773461 | 26106103 | 332643 | 5 | 5  | 0 | 0.02473314 | 0 | 9  | 0 | 0.76806864 | 0          |
| chr10 | 26106103 | 26459434 | 353332 | 9 | 6  | 0 | 0.04875589 | 0 | 9  | 0 | 0.5732208  | 0          |
| chr10 | 26459434 | 26611986 | 152553 | 5 | 6  | 0 | 0.02473314 | 0 | 9  | 0 | 0.76806864 | 0          |
| chr10 | 26611986 | 26727223 | 115238 | 2 | 6  | 0 | 0.04875589 | 0 | 9  | 0 | 0.5732208  | 0          |
| chr10 | 26727223 | 26727268 | 46     | 1 | 6  | 0 | 0.02793176 | 0 | 10 | 0 | 0.74627054 | 0          |
| chr10 | 26727268 | 26822412 | 95145  | 2 | 5  | 0 | 0.01320236 | 0 | 10 | 0 | 0.97390707 | 0          |
| chr10 | 26822412 | 26822471 | 60     | 1 | 6  | 0 | 0.02793176 | 0 | 10 | 0 | 0.74627054 | 0          |
| chr10 | 26822471 | 26858131 | 35661  | 2 | 5  | 0 | 0.01320236 | 0 | 10 | 0 | 0.97390707 | 0          |
| chr10 | 26858131 | 26991816 | 133686 | 1 | 5  | 0 | 0.02473314 | 0 | 9  | 0 | 0.76806864 | 0          |
| chr10 | 26991816 | 27091081 | 99266  | 3 | 6  | 0 | 0.02793176 | 0 | 10 | 0 | 0.74627054 | 0          |
| chr10 | 27091081 | 27147044 | 55964  | 1 | 5  | 0 | 0.01320236 | 0 | 10 | 0 | 0.97390707 | 0          |
| chr10 | 27147044 | 27147103 | 60     | 1 | 5  | 0 | 0.00317045 | 0 | 12 | 0 | 1.46403142 | 0          |
| chr10 | 27147103 | 27266067 | 118965 | 1 | 5  | 0 | 0.02473314 | 0 | 9  | 0 | 0.76806864 | 0          |
| chr10 | 27266067 | 27294439 | 28373  | 2 | 5  | 0 | 0.01320236 | 0 | 10 | 0 | 0.97390707 | 0          |
| chr10 | 27294439 | 27313441 | 19003  | 2 | 5  | 0 | 0.00666883 | 0 | 11 | 0 | 1.20557689 | 0          |
| chr10 | 27313441 | 27313500 | 60     | 1 | 6  | 0 | 0.01518174 | 0 | 11 | 0 | 0.9449689  | 0          |
| chr10 | 27313500 | 27415826 | 102327 | 3 | 5  | 0 | 0.01320236 | 0 | 10 | 0 | 0.97390707 | 0          |
| chr10 | 27415826 | 27444025 | 28200  | 2 | 5  | 0 | 0.00666883 | 0 | 11 | 0 | 1.20557689 | 0          |
| chr10 | 27444025 | 27444075 | 51     | 1 | 6  | 0 | 0.01518174 | 0 | 11 | 0 | 0.9449689  | 0          |
| chr10 | 27444075 | 27461727 | 17653  | 1 | 5  | 0 | 0.00666883 |   |    |   |            |            |

|       |          |          |        |    |   |   |            |            |    |   |            |            |
|-------|----------|----------|--------|----|---|---|------------|------------|----|---|------------|------------|
| chr10 | 29149230 | 29309540 | 160311 | 3  | 8 | 0 | 0.13872638 | 0          | 9  | 0 | 0.30102999 | 0          |
| chr10 | 29309540 | 29309599 | 60     | 1  | 9 | 0 | 0.14135546 | 0          | 10 | 0 | 0.30102999 | 0          |
| chr10 | 29309599 | 29494622 | 185024 | 1  | 8 | 0 | 0.08923291 | 0          | 10 | 0 | 0.4167287  | 0          |
| chr10 | 29494622 | 29582455 | 87834  | 2  | 8 | 0 | 0.05490675 | 0          | 11 | 0 | 0.55623409 | 0          |
| chr10 | 29582455 | 29664214 | 81760  | 2  | 9 | 0 | 0.09154957 | 0          | 11 | 0 | 0.4144892  | 0          |
| chr10 | 29664214 | 29764262 | 100049 | 2  | 9 | 0 | 0.0331093  | 0          | 13 | 0 | 0.71538971 | 0          |
| chr10 | 29764262 | 29923752 | 159491 | 6  | 9 | 0 | 0.01817691 | 0          | 14 | 0 | 0.90719478 | 0          |
| chr10 | 29923752 | 30017357 | 93606  | 2  | 9 | 0 | 0.0565833  | 0          | 12 | 0 | 0.55190077 | 0          |
| chr10 | 30017357 | 30135457 | 118101 | 2  | 8 | 0 | 0.08923291 | 0          | 10 | 0 | 0.4167287  | 0          |
| chr10 | 30135457 | 30190964 | 55508  | 2  | 9 | 1 | 0.0565833  | 0.30102999 | 12 | 0 | 0.55190077 | 0          |
| chr10 | 30190964 | 30275294 | 84331  | 1  | 9 | 1 | 0.14135546 | 0.30102999 | 10 | 0 | 0.30102999 | 0          |
| chr10 | 30275294 | 30406831 | 131538 | 3  | 7 | 1 | 0.05232577 | 0.30102999 | 10 | 0 | 0.56314362 | 0          |
| chr10 | 30406831 | 30537801 | 130971 | 1  | 6 | 1 | 0.02793176 | 0.30102999 | 10 | 0 | 0.74627054 | 0          |
| chr10 | 30537801 | 30537860 | 60     | 1  | 6 | 1 | 0.02793176 | 0.1218695  | 10 | 1 | 0.74627054 | 0.1218695  |
| chr10 | 30537860 | 30661355 | 123496 | 3  | 5 | 0 | 0.01320236 | 0          | 10 | 0 | 0.97390707 | 0          |
| chr10 | 30661355 | 30661414 | 60     | 1  | 5 | 0 | 0.01320236 | 0          | 10 | 1 | 0.97390707 | 0.30102999 |
| chr10 | 30661414 | 30728137 | 66724  | 1  | 5 | 0 | 0.01320236 | 0          | 10 | 0 | 0.97390707 | 0          |
| chr10 | 30728137 | 30750028 | 21892  | 4  | 6 | 0 | 0.02793176 | 0          | 10 | 0 | 0.74627054 | 0          |
| chr10 | 30750028 | 30750087 | 60     | 1  | 7 | 0 | 0.03037338 | 0          | 11 | 0 | 0.73110763 | 0          |
| chr10 | 30750087 | 30822470 | 72384  | 2  | 6 | 0 | 0.02793176 | 0          | 10 | 0 | 0.74627054 | 0          |
| chr10 | 30822470 | 30961827 | 139358 | 1  | 4 | 0 | 0.02074938 | 0          | 8  | 0 | 0.79906872 | 0          |
| chr10 | 30961827 | 31156591 | 194765 | 2  | 3 | 0 | 0.01598258 | 0          | 7  | 0 | 0.84395715 | 0          |
| chr10 | 31156591 | 31156650 | 60     | 1  | 4 | 0 | 0.03812622 | 0          | 7  | 0 | 0.60763643 | 0          |
| chr10 | 31156650 | 31291873 | 135224 | 3  | 3 | 0 | 0.01598258 | 0          | 7  | 0 | 0.84395715 | 0          |
| chr10 | 31291873 | 31291932 | 60     | 1  | 4 | 0 | 0.03812622 | 0          | 7  | 0 | 0.60763643 | 0          |
| chr10 | 31291932 | 31387211 | 95280  | 1  | 3 | 0 | 0.01598258 | 0          | 7  | 0 | 0.84395715 | 0          |
| chr10 | 31387211 | 31507862 | 120652 | 2  | 4 | 0 | 0.02074938 | 0          | 8  | 0 | 0.79906872 | 0          |
| chr10 | 31507862 | 31551563 | 43702  | 2  | 5 | 0 | 0.04407651 | 0          | 8  | 0 | 0.58747015 | 0          |
| chr10 | 31551563 | 31637549 | 85987  | 2  | 4 | 0 | 0.02074938 | 0          | 8  | 0 | 0.79906872 | 0          |
| chr10 | 31637549 | 31637608 | 60     | 1  | 5 | 0 | 0.04407651 | 0          | 8  | 0 | 0.58747015 | 0          |
| chr10 | 31637608 | 31715824 | 78217  | 2  | 5 | 0 | 0.07511598 | 0          | 7  | 0 | 0.43181735 | 0          |
| chr10 | 31715824 | 32012867 | 297044 | 5  | 5 | 0 | 0.12309572 | 0          | 6  | 0 | 0.30102999 | 0          |
| chr10 | 32012867 | 32166608 | 153742 | 4  | 3 | 0 | 0.03070643 | 0          | 6  | 0 | 0.63695542 | 0          |
| chr10 | 32166608 | 32197507 | 30900  | 2  | 4 | 0 | 0.03812622 | 0          | 7  | 0 | 0.60763643 | 0          |
| chr10 | 32197507 | 32300151 | 102645 | 2  | 3 | 0 | 0.01598258 | 0          | 7  | 0 | 0.84395715 | 0          |
| chr10 | 32300151 | 32300210 | 60     | 1  | 4 | 0 | 0.02074938 | 0          | 8  | 0 | 0.79906872 | 0          |
| chr10 | 32300210 | 32505928 | 205719 | 5  | 3 | 0 | 0.0079614  | 0          | 8  | 0 | 1.07548421 | 0          |
| chr10 | 32505928 | 32505987 | 60     | 1  | 5 | 0 | 0.04407651 | 0          | 8  | 0 | 0.58747015 | 0          |
| chr10 | 32505987 | 32627962 | 121976 | 2  | 4 | 0 | 0.03812622 | 0          | 7  | 0 | 0.60763643 | 0          |
| chr10 | 32627962 | 32628021 | 60     | 1  | 4 | 0 | 0.02074938 | 0          | 8  | 0 | 0.79906872 | 0          |
| chr10 | 32628021 | 32779348 | 151328 | 3  | 4 | 0 | 0.03812622 | 0          | 7  | 0 | 0.60763643 | 0          |
| chr10 | 32779348 | 32952767 | 173420 | 4  | 5 | 0 | 0.07511598 | 0          | 7  | 0 | 0.43181735 | 0          |
| chr10 | 32952767 | 32978070 | 25304  | 2  | 5 | 0 | 0.02473314 | 0          | 9  | 0 | 0.67806864 | 0          |
| chr10 | 32978070 | 33093075 | 115006 | 2  | 5 | 0 | 0.04407651 | 0          | 8  | 0 | 0.58747015 | 0          |
| chr10 | 33093075 | 33093134 | 60     | 1  | 5 | 0 | 0.02473314 | 0          | 9  | 0 | 0.67806864 | 0          |
| chr10 | 33093134 | 33165392 | 72259  | 3  | 5 | 0 | 0.04407651 | 0          | 8  | 0 | 0.58747015 | 0          |
| chr10 | 33165392 | 33224403 | 59012  | 1  | 4 | 0 | 0.03812622 | 0          | 7  | 0 | 0.60763643 | 0          |
| chr10 | 33224403 | 33244547 | 20145  | 3  | 4 | 0 | 0.02074938 | 0          | 8  | 0 | 0.79906872 | 0          |
| chr10 | 33244547 | 33491224 | 246678 | 3  | 3 | 0 | 0.03070643 | 0          | 6  | 0 | 0.63695542 | 0          |
| chr10 | 33491224 | 33491282 | 59     | 1  | 4 | 0 | 0.03812622 | 0          | 7  | 0 | 0.60763643 | 0          |
| chr10 | 33491282 | 33550158 | 58877  | 1  | 3 | 0 | 0.01598258 | 0          | 7  | 0 | 0.84395715 | 0          |
| chr10 | 33550158 | 33582780 | 32623  | 1  | 3 | 0 | 0.03070643 | 0          | 6  | 0 | 0.63695542 | 0          |
| chr10 | 33582780 | 33582839 | 60     | 1  | 4 | 0 | 0.06713722 | 0          | 6  | 0 | 0.44141547 | 0          |
| chr10 | 33582839 | 33606406 | 23568  | 1  | 3 | 0 | 0.03070643 | 0          | 6  | 0 | 0.63695542 | 0          |
| chr10 | 33606406 | 33778244 | 171839 | 3  | 3 | 0 | 0.01598258 | 0          | 7  | 0 | 0.84395715 | 0          |
| chr10 | 33778244 | 33778303 | 60     | 1  | 3 | 0 | 0.0079614  | 0          | 8  | 0 | 1.07548421 | 0          |
| chr10 | 33778303 | 33938406 | 160104 | 1  | 3 | 0 | 0.01598258 | 0          | 7  | 0 | 0.84395715 | 0          |
| chr10 | 33938406 | 34057481 | 119076 | 2  | 4 | 0 | 0.03812622 | 0          | 7  | 0 | 0.60763643 | 0          |
| chr10 | 34057481 | 34232509 | 175029 | 2  | 5 | 0 | 0.07511598 | 0          | 7  | 0 | 0.43181735 | 0          |
| chr10 | 34232509 | 34232568 | 60     | 1  | 6 | 0 | 0.0078066  | 0          | 12 | 0 | 1.17038931 | 0          |
| chr10 | 34232568 | 34484667 | 252100 | 3  | 5 | 0 | 0.01320236 | 0          | 10 | 0 | 0.97390707 | 0          |
| chr10 | 34484667 | 34484725 | 59     | 1  | 6 | 0 | 0.02793176 | 0          | 10 | 0 | 0.74627054 | 0          |
| chr10 | 34484725 | 34537239 | 52515  | 1  | 5 | 0 | 0.01320236 | 0          | 10 | 0 | 0.97390707 | 0          |
| chr10 | 34537239 | 34537298 | 60     | 1  | 5 | 0 | 0.00666883 | 0          | 11 | 0 | 1.20557689 | 0          |
| chr10 | 34537298 | 34626197 | 88900  | 2  | 5 | 0 | 0.01320236 | 0          | 10 | 0 | 0.97390707 | 0          |
| chr10 | 34626197 | 34715611 | 89415  | 3  | 5 | 0 | 0.00666883 | 0          | 11 | 0 | 1.20557689 | 0          |
| chr10 | 34715611 | 34715670 | 60     | 1  | 5 | 0 | 0.00317045 | 0          | 12 | 0 | 1.46403142 | 0          |
| chr10 | 34715670 | 34885774 | 170105 | 5  | 5 | 0 | 0.01320236 | 0          | 10 | 0 | 0.97390707 | 0          |
| chr10 | 34885774 | 34985340 | 99567  | 2  | 5 | 0 | 0.04407651 | 0          | 8  | 0 | 0.58747015 | 0          |
| chr10 | 34985340 | 35391918 | 406579 | 10 | 6 | 0 | 0.04875589 | 0          | 9  | 1 | 0.5732208  | 0.30102999 |
| chr10 | 35391918 | 35530457 | 138540 | 4  | 4 | 0 | 0.01077081 | 0          | 9  | 1 | 1.01542894 | 0.30102999 |
| chr10 | 35530457 | 35605447 | 74991  | 1  | 4 | 0 | 0.03812622 | 0          | 7  | 1 | 0.60763643 | 0.30102999 |
| chr10 | 35605447 | 35652737 | 47291  | 2  | 5 | 0 | 0.07511598 | 0          | 7  | 1 | 0.43181735 | 0.30102999 |
| chr10 | 35652737 | 35760318 | 107582 | 2  | 4 | 0 | 0.03812622 | 0          | 7  | 1 | 0.60763643 | 0.30102999 |
| chr10 | 35760318 | 35790460 | 30143  | 2  | 5 | 0 | 0.04407651 | 0          | 8  | 1 | 0.58747015 | 0.30102999 |
| chr10 | 35790460 | 35823303 | 32844  | 1  | 4 | 0 | 0.02074938 | 0          | 8  | 1 | 0.79906872 | 0.30102999 |
| chr10 | 35823303 | 35823354 | 52     | 1  | 5 | 0 | 0.02473314 | 0          | 9  | 1 | 0.67806864 | 0.30102999 |
| chr10 | 35823354 | 35927794 | 104441 | 3  | 3 | 0 | 0.03070643 | 0          | 6  | 1 | 0.63695542 | 0.30102999 |
| chr10 | 35927794 | 36238765 | 310972 | 3  | 1 | 0 | 0.00478973 | 0          | 5  | 1 | 1.02643191 | 0.30102999 |
| chr10 | 36238765 | 36238824 | 60     | 1  | 1 | 0 | 0.00204627 | 0          | 6  | 1 | 1.31360226 | 0.30102999 |
| chr10 | 36238824 | 36418814 | 179991 | 1  | 1 | 0 | 0.00478973 | 0          | 5  | 1 | 1.02643191 | 0.30102999 |
| chr10 | 36418814 | 36912799 | 493986 | 4  | 1 | 0 | 0.02438896 | 0          | 3  | 0 | 0.51676182 | 0.30102999 |
| chr10 | 42889244 | 42969765 | 80522  | 2  | 1 | 0 | 0.02438896 | 0          | 3  | 1 | 0.51676182 | 0.30102999 |
| chr10 | 42969765 | 42998583 | 28819  | 3  | 1 | 0 | 0.02438896 | 0          | 3  | 2 | 0.51676182 | 0.61140001 |
| chr10 | 42998583 | 43238249 | 239667 | 5  | 1 | 0 | 0.01091641 | 0          | 4  | 2 | 0.76005302 | 0.61140001 |
| chr10 | 43238249 | 43818029 | 579781 | 13 | 2 | 0 | 0.0429175  | 0          | 4  | 2 | 0.47744371 | 0.61140001 |
| chr10 | 43818029 | 43818088 | 60     | 1  | 2 | 0 | 0.02162467 | 0          | 5  | 2 | 0.68214471 | 0.61140001 |
| chr10 | 43818088 | 43868297 | 50210  | 1  | 2 | 0 | 0.0429175  | 0          | 4  | 2 | 0.47744371 | 0.61140001 |
| chr10 | 43868297 | 43868356 | 60     | 1  | 2 | 0 | 0.02162467 | 0          | 5  | 2 | 0.68214471 | 0.61140001 |
| chr10 | 43868356 | 43949913 | 81558  | 2  | 2 | 0 | 0.0429175  | 0          | 4  | 1 | 0.47744371 | 0.30102999 |
| chr10 | 43949913 | 43949972 | 60     | 1  | 2 | 0 | 0.0429175  | 0          | 4  | 2 | 0.47744371 | 0.61140001 |
| chr10 | 43949972 | 44017493 | 67522  | 2  | 1 | 0 | 0.02438896 | 0          | 3  | 2 | 0.51676182 | 0.61140001 |
| chr10 | 44017493 | 44104662 | 87170  | 3  | 2 | 0 | 0.08289318 | 0          | 3  | 2 | 0.30102999 | 0.61140001 |
| chr10 | 44104662 | 44139435 | 34774  | 2  | 2 | 0 | 0.0429175  | 0          | 4  | 2 | 0.47744371 | 0.61140001 |
| chr10 | 44139435 | 44353706 | 214272 | 4  | 2 | 0 | 0.08289318 | 0          | 3  | 2 | 0.30102999 | 0.61140001 |
| chr10 | 44353706 | 44353765 | 60     | 1  | 2 | 0 | 0.0429175  | 0          | 4  | 3 | 0.47744371 | 0.93173516 |
| chr10 | 44353765 | 44484281 | 130517 | 2  | 2 | 0 | 0.0429175  | 0          | 4  | 2 | 0.47744371 | 0.61140001 |
| chr10 | 44484281 | 44706857 | 222577 | 2  | 2 | 0 | 0.0429175  | 0          | 4  | 3 | 0.47744371 | 0.93173516 |
| chr10 | 44706857 | 44706916 | 60     | 1  | 2 | 0 | 0.02162467 | 0          | 5  | 3 | 0.68214471 | 0.93173516 |
| chr10 | 44706916 | 44867043 | 160128 | 2  | 1 |   |            |            |    |   |            |            |

|       |          |          |        |   |   |   |              |            |   |   |            |            |
|-------|----------|----------|--------|---|---|---|--------------|------------|---|---|------------|------------|
| chr10 | 50358762 | 50580284 | 221523 | 3 | 2 | 1 | 0.30102999   | 0.00204627 | 1 | 6 | 0.05404976 | 1.31360226 |
| chr10 | 50580284 | 50580343 | 60     | 1 | 2 | 1 | 0.30102999   | 8.47E-04   | 1 | 7 | 0.05404976 | 1.62048027 |
| chr10 | 50580343 | 50668502 | 88160  | 1 | 1 | 1 | 0.1218695    | 0.00478973 | 1 | 5 | 0.1218695  | 1.02643191 |
| chr10 | 50668502 | 50765972 | 97471  | 3 | 1 | 1 | 0.1218695    | 0.02438896 | 1 | 3 | 0.1218695  | 0.51676182 |
| chr10 | 50765972 | 50766031 | 60     | 1 | 1 | 1 | 0.1218695    | 0.01091641 | 1 | 4 | 0.1218695  | 0.76005302 |
| chr10 | 50766031 | 50849538 | 83508  | 1 | 1 | 0 | 0.1218695    |            | 1 | 4 | 0.1218695  | 1.26272838 |
| chr10 | 50849538 | 50916848 | 67311  | 3 | 1 | 1 | 0.1218695    | 0.01091641 | 1 | 4 | 0.1218695  | 0.76005302 |
| chr10 | 50916848 | 50916907 | 60     | 1 | 2 | 1 | 0.1218695    | 0.0429175  | 1 | 4 | 0.1218695  | 0.47744371 |
| chr10 | 50916907 | 50968591 | 51685  | 2 | 1 | 2 | 0.1218695    | 0.08289318 | 1 | 3 | 0.1218695  | 0.30102999 |
| chr10 | 50968591 | 50968645 | 55     | 1 | 2 | 1 | 0.1218695    | 0.0429175  | 1 | 4 | 0.1218695  | 0.47744371 |
| chr10 | 50968645 | 51026371 | 57727  | 1 | 1 | 0 | 0.1218695    |            | 1 | 4 | 0.1218695  | 1.26272838 |
| chr10 | 51026371 | 51549555 | 523185 | 2 | 1 | 0 | 0.1218695    |            | 1 | 3 | 0.1218695  | 0.93173516 |
| chr10 | 51549555 | 51664079 | 114525 | 6 | 1 | 1 | 0.1218695    | 0.02438896 | 1 | 3 | 0.1218695  | 0.51676182 |
| chr10 | 51664079 | 51804961 | 140883 | 1 | 1 | 0 | 0.1218695    |            | 1 | 3 | 0.1218695  | 0.93173516 |
| chr10 | 51804961 | 51805020 | 60     | 1 | 2 | 0 | 0.1575501    |            | 2 | 4 | 0.1575501  | 1.26272838 |
| chr10 | 51805020 | 52006170 | 201151 | 2 | 1 | 0 | 0.05404976   |            | 2 | 4 | 0.30102999 | 1.26272838 |
| chr10 | 52006170 | 52036781 | 30612  | 1 | 1 | 0 | 0.02438896   |            | 3 | 4 | 0.51676182 | 1.26272838 |
| chr10 | 52036781 | 52036840 | 60     | 1 | 1 | 1 | 0.01091641   |            | 4 | 4 | 0.76005302 | 0.76005302 |
| chr10 | 52036840 | 52066864 | 30025  | 1 | 1 | 1 | 0.05404976   | 0.01091641 | 2 | 4 | 0.30102999 | 0.76005302 |
| chr10 | 52066864 | 52108756 | 41893  | 1 | 1 | 0 | 0.05404976   |            | 2 | 3 | 0.30102999 | 0.93173516 |
| chr10 | 52108756 | 52206675 | 87920  | 3 | 2 | 0 | 0.1575501    |            | 2 | 3 | 0.1575501  | 0.93173516 |
| chr10 | 52206675 | 52279593 | 72919  | 2 | 2 | 0 | 0.08289318   |            | 4 | 4 | 0.30102999 | 1.26272838 |
| chr10 | 52279593 | 52566413 | 286821 | 6 | 2 | 0 | 0.0429175    |            | 4 | 4 | 0.47744371 | 1.26272838 |
| chr10 | 52566413 | 52777344 | 210932 | 4 | 2 | 0 | 0.08289318   |            | 3 | 4 | 0.30102999 | 1.26272838 |
| chr10 | 52777344 | 52857542 | 80199  | 3 | 2 | 1 | 0.08289318   | 0.00478973 | 3 | 5 | 0.30102999 | 1.02643191 |
| chr10 | 52857542 | 53032642 | 175101 | 4 | 2 | 0 | 0.08289318   |            | 3 | 5 | 0.30102999 | 1.60515106 |
| chr10 | 53032642 | 53102430 | 69789  | 2 | 1 | 1 | 0.08289318   | 0.00478973 | 3 | 5 | 0.30102999 | 1.02643191 |
| chr10 | 53102430 | 53227459 | 125030 | 3 | 2 | 0 | 0.08289318   |            | 3 | 5 | 0.30102999 | 1.60515106 |
| chr10 | 53227459 | 53269263 | 41805  | 2 | 3 | 0 | 0.17593012   |            | 3 | 5 | 0.17593012 | 1.60515106 |
| chr10 | 53269263 | 53361898 | 92366  | 2 | 3 | 0 | 0.17593012   |            | 3 | 4 | 0.17593012 | 1.26272838 |
| chr10 | 53361898 | 53361957 | 60     | 1 | 3 | 0 | 0.17593012   |            | 3 | 5 | 0.17593012 | 1.60515106 |
| chr10 | 53361957 | 53746679 | 384723 | 9 | 3 | 0 | 0.17593012   |            | 3 | 4 | 0.17593012 | 1.26272838 |
| chr10 | 53746679 | 53807219 | 60541  | 1 | 3 | 0 | 0.17593012   |            | 3 | 3 | 0.17593012 | 0.93173516 |
| chr10 | 53807219 | 53982674 | 175456 | 4 | 3 | 0 | 0.17593012   |            | 3 | 4 | 0.17593012 | 1.26272838 |
| chr10 | 53982674 | 54213409 | 230736 | 5 | 3 | 0 | 0.17593012   |            | 3 | 3 | 0.17593012 | 0.93173516 |
| chr10 | 54213409 | 54584632 | 371224 | 3 | 3 | 0 | 0.30102999   |            | 2 | 3 | 0.08289318 | 0.93173516 |
| chr10 | 54584632 | 54676207 | 91576  | 1 | 3 | 0 | 0.51676182   |            | 1 | 1 | 0.02438896 | 0.30102999 |
| chr10 | 54676207 | 54810783 | 134577 | 1 | 2 | 0 | 0.30102999   |            | 1 | 1 | 0.05404976 | 0.30102999 |
| chr10 | 54810783 | 55186702 | 375920 | 2 | 2 | 0 | 0.30102999   |            | 1 | 3 | 0.05404976 | 0.93173516 |
| chr10 | 55186702 | 55236904 | 50203  | 2 | 2 | 0 | 0.30102999   |            | 1 | 4 | 0.05404976 | 1.26272838 |
| chr10 | 55236904 | 55236963 | 60     | 1 | 2 | 0 | 0.30102999   |            | 1 | 5 | 0.05404976 | 1.60515106 |
| chr10 | 55236963 | 55355871 | 118909 | 1 | 2 | 0 | 0.30102999   |            | 1 | 4 | 0.05404976 | 1.26272838 |
| chr10 | 55355871 | 55480375 | 124505 | 1 | 3 | 0 | 0.51676182   |            | 1 | 4 | 0.02438896 | 1.26272838 |
| chr10 | 55480375 | 55516193 | 35819  | 2 | 3 | 0 | 0.51676182   |            | 1 | 2 | 0.02438896 | 0.61140001 |
| chr10 | 55516193 | 55516252 | 60     | 1 | 4 | 0 | 0.76005302   |            | 1 | 2 | 0.01091641 | 0.61140001 |
| chr10 | 55516252 | 55754373 | 238122 | 5 | 3 | 0 | 0.51676182   |            | 1 | 2 | 0.02438896 | 0.61140001 |
| chr10 | 55754373 | 55803078 | 48706  | 1 | 3 | 0 | 0.51676182   |            | 1 | 1 | 0.02438896 | 0.30102999 |
| chr10 | 55803078 | 55803137 | 60     | 1 | 3 | 0 | 0.51676182   |            | 1 | 2 | 0.02438896 | 0.61140001 |
| chr10 | 55803137 | 55925472 | 122336 | 2 | 3 | 0 | 0.51676182   |            | 1 | 1 | 0.02438896 | 0.30102999 |
| chr10 | 55925472 | 55985113 | 59642  | 2 | 3 | 0 | 0.51676182   |            | 1 | 2 | 0.02438896 | 0.61140001 |
| chr10 | 55985113 | 56014996 | 29884  | 2 | 3 | 0 | 0.51676182   |            | 1 | 5 | 0.02438896 | 1.60515106 |
| chr10 | 56014996 | 56131740 | 116745 | 3 | 3 | 0 | 0.51676182   |            | 1 | 3 | 0.02438896 | 0.93173516 |
| chr10 | 56131740 | 56319908 | 188169 | 3 | 3 | 0 | 0.51676182   |            | 1 | 2 | 0.02438896 | 0.61140001 |
| chr10 | 56319908 | 56369329 | 49422  | 3 | 3 | 0 | 0.30102999   |            | 2 | 5 | 0.08289318 | 1.60515106 |
| chr10 | 56369329 | 56394602 | 25274  | 2 | 3 | 0 | 0.30102999   |            | 2 | 6 | 0.08289318 | 1.95986592 |
| chr10 | 56394602 | 56486116 | 91515  | 2 | 3 | 0 | 0.30102999   |            | 2 | 5 | 0.08289318 | 1.60515106 |
| chr10 | 56486116 | 56564594 | 78479  | 2 | 4 | 0 | 0.47744371   |            | 2 | 6 | 0.0429175  | 1.95986592 |
| chr10 | 56564594 | 56676461 | 111868 | 1 | 4 | 0 | 0.30102999   |            | 2 | 4 | 0.08289318 | 1.26272838 |
| chr10 | 56676461 | 56877260 | 200800 | 2 | 2 | 2 | 0.1575501    |            | 2 | 4 | 0.1575501  | 1.26272838 |
| chr10 | 56877260 | 56877319 | 60     | 1 | 2 | 1 | 0.1575501    | 0.01091641 | 2 | 4 | 0.1575501  | 0.76005302 |
| chr10 | 56877319 | 57038923 | 161605 | 2 | 2 | 0 | 0.1575501    |            | 2 | 1 | 0.1575501  | 0.30102999 |
| chr10 | 57038923 | 57038982 | 60     | 1 | 2 | 0 | 0.1575501    |            | 2 | 2 | 0.1575501  | 0.61140001 |
| chr10 | 57038982 | 57091487 | 52506  | 1 | 2 | 0 | 0.1575501    |            | 2 | 1 | 0.1575501  | 0.30102999 |
| chr10 | 57091487 | 57303429 | 211943 | 3 | 2 | 1 | 0.05404976   |            | 2 | 1 | 0.30102999 | 0.30102999 |
| chr10 | 57303429 | 57470290 | 166882 | 4 | 1 | 0 | 0.05404976   |            | 2 | 3 | 0.30102999 | 0.93173516 |
| chr10 | 57470290 | 57723213 | 252924 | 1 | 1 | 0 | 0.1218695    |            | 1 | 3 | 0.1218695  | 0.93173516 |
| chr10 | 57723213 | 57723272 | 60     | 1 | 1 | 0 | 0.1218695    |            | 1 | 4 | 0.1218695  | 1.26272838 |
| chr10 | 57723272 | 57831487 | 108216 | 1 | 0 | 0 | 0.30102999   |            | 1 | 3 | 0.30102999 | 0.93173516 |
| chr10 | 57831487 | 58121294 | 289808 | 2 | 1 | 0 | 0.30102999   |            | 1 | 2 | 0.61140001 | 0.61140001 |
| chr10 | 58121294 | 58121349 | 56     | 1 | 0 | 0 | 0.30102999   |            | 1 | 3 | 0.30102999 | 0.93173516 |
| chr10 | 58121349 | 58421494 | 300146 | 2 | 0 | 0 | 0.30102999   |            | 2 | 2 | 0.61140001 | 0.61140001 |
| chr10 | 58421494 | 58686145 | 264652 | 1 | 0 | 0 | 0.30102999   |            | 1 | 1 | 0.30102999 | 0.30102999 |
| chr10 | 58686145 | 59028244 | 342100 | 2 | 0 | 0 | 0.30102999   |            | 1 | 1 | 0.30102999 | 0.30102999 |
| chr10 | 59028244 | 59209294 | 181051 | 2 | 0 | 0 | 0.30102999   |            | 1 | 1 | 0.30102999 | 0.30102999 |
| chr10 | 59209294 | 59452586 | 243293 | 3 | 0 | 0 | 0.30102999   |            | 1 | 3 | 0.30102999 | 0.93173516 |
| chr10 | 59452586 | 59582257 | 129672 | 2 | 0 | 0 | 0.30102999   |            | 1 | 5 | 0.30102999 | 1.60515106 |
| chr10 | 59582257 | 59960546 | 378290 | 5 | 1 | 0 | 0.1218695    |            | 1 | 5 | 0.1218695  | 1.60515106 |
| chr10 | 59960546 | 59974608 | 14063  | 1 | 1 | 0 | 0.1218695    |            | 1 | 4 | 0.1218695  | 1.26272838 |
| chr10 | 59974608 | 60033417 | 58810  | 1 | 1 | 0 | 0.1218695    |            | 1 | 3 | 0.1218695  | 0.93173516 |
| chr10 | 60033417 | 60123346 | 89930  | 3 | 2 | 0 | 0.30102999   |            | 1 | 4 | 0.05404976 | 1.26272838 |
| chr10 | 60123346 | 60196887 | 73542  | 4 | 2 | 0 | 0.30102999   |            | 1 | 5 | 0.05404976 | 1.60515106 |
| chr10 | 60196887 | 60417076 | 220190 | 4 | 2 | 0 | 0.30102999   |            | 1 | 4 | 0.05404976 | 1.26272838 |
| chr10 | 60417076 | 60417135 | 60     | 1 | 2 | 0 | 0.30102999   |            | 1 | 5 | 0.05404976 | 1.60515106 |
| chr10 | 60417135 | 60516571 | 99437  | 2 | 2 | 0 | 0.30102999   |            | 1 | 4 | 0.05404976 | 1.26272838 |
| chr10 | 60516571 | 60516630 | 60     | 1 | 2 | 0 | 0.30102999   |            | 1 | 5 | 0.05404976 | 1.60515106 |
| chr10 | 60516630 | 60574007 | 57378  | 2 | 2 | 0 | 0.30102999   |            | 1 | 4 | 0.05404976 | 1.26272838 |
| chr10 | 60574007 | 60885982 | 311976 | 3 | 2 | 0 | 0.30102999   |            | 1 | 3 | 0.05404976 | 0.93173516 |
| chr10 | 60885982 | 61006839 | 120858 | 5 | 3 | 0 | 0.30102999   |            | 2 | 3 | 0.08289318 | 0.93173516 |
| chr10 | 61006839 | 61008352 | 1514   | 1 | 3 | 0 | 0.10122019   |            | 4 | 3 | 0.30102999 | 0.93173516 |
| chr10 | 61008352 | 61062589 | 54238  | 1 | 3 | 0 | 0.30102999   |            | 2 | 3 | 0.08289318 | 0.93173516 |
| chr10 | 61062589 | 61122141 | 59553  | 3 | 3 | 0 | 0.30102999   |            | 2 | 4 | 0.08289318 | 1.26272838 |
| chr10 | 61122141 | 61122196 | 56     | 1 | 3 | 1 | 0.30102999   | 0.00204627 | 6 | 6 | 0.08289318 | 1.31360226 |
| chr10 | 61122196 | 61188677 | 66482  | 1 | 3 | 0 | 0.30102999   |            | 2 | 6 | 0.08289318 | 1.95986592 |
| chr10 | 61188677 | 61361946 | 173270 | 2 | 4 | 0 | 0.18734596   |            | 4 | 6 | 0.18734596 | 1.95986592 |
| chr10 | 61361946 | 61410711 | 48766  | 2 | 4 | 1 | 0.18734596   | 8.47E-04   | 4 | 7 | 0.18734596 | 1.62048027 |
| chr10 | 61410711 | 61551500 | 140790 | 3 | 4 | 0 | 0.18734596</ |            |   |   |            |            |

|       |          |          |        |   |   |   |            |            |   |   |            |            |
|-------|----------|----------|--------|---|---|---|------------|------------|---|---|------------|------------|
| chr10 | 66985030 | 66985089 | 60     | 1 | 0 | 0 | 0          | 0          | 1 | 4 | 0.30102999 | 1.26272838 |
| chr10 | 66985089 | 67399303 | 414215 | 2 | 0 | 0 | 0          | 0          | 1 | 3 | 0.30102999 | 0.93173516 |
| chr10 | 67399303 | 67454101 | 54799  | 2 | 1 | 0 | 0.1218695  | 0          | 1 | 3 | 0.1218695  | 0.93173516 |
| chr10 | 67454101 | 67637905 | 183805 | 2 | 1 | 1 | 0.1218695  | 0.02438896 | 1 | 3 | 0.1218695  | 0.51676182 |
| chr10 | 67637905 | 67637964 | 60     | 1 | 1 | 1 | 0.1218695  | 0.01091641 | 1 | 4 | 0.1218695  | 0.76005302 |
| chr10 | 67637964 | 67758613 | 120650 | 2 | 1 | 0 | 0.1218695  | 0          | 1 | 3 | 0.1218695  | 0.93173516 |
| chr10 | 67758613 | 67865256 | 106644 | 3 | 1 | 0 | 0.1218695  | 0          | 1 | 4 | 0.1218695  | 1.26272838 |
| chr10 | 67865256 | 67907699 | 42444  | 2 | 1 | 0 | 0.05404976 | 0          | 2 | 4 | 0.30102999 | 1.26272838 |
| chr10 | 67907699 | 68040325 | 132627 | 4 | 1 | 1 | 0.05404976 | 0.01091641 | 2 | 4 | 0.30102999 | 0.76005302 |
| chr10 | 68040325 | 68040384 | 60     | 1 | 1 | 1 | 0.05404976 | 0.00204627 | 2 | 6 | 0.30102999 | 1.31360226 |
| chr10 | 68040384 | 68383364 | 342981 | 8 | 1 | 1 | 0.05404976 | 0.00478973 | 2 | 5 | 0.30102999 | 1.02643191 |
| chr10 | 68383364 | 68443835 | 60472  | 2 | 1 | 1 | 0.05404976 | 0.00204627 | 2 | 6 | 0.30102999 | 1.31360226 |
| chr10 | 68443835 | 68599432 | 155598 | 4 | 1 | 1 | 0.02438896 | 0.00204627 | 3 | 6 | 0.51676182 | 1.31360226 |
| chr10 | 68599432 | 68686933 | 87502  | 3 | 1 | 1 | 0.02438896 | 8.47E-04   | 3 | 7 | 0.51676182 | 1.62048027 |
| chr10 | 68686933 | 68687691 | 759    | 2 | 1 | 1 | 0.01091641 | 8.47E-04   | 4 | 7 | 0.76005302 | 1.62048027 |
| chr10 | 68687691 | 68779472 | 91782  | 2 | 1 | 1 | 0.01091641 | 0.00204627 | 4 | 6 | 0.76005302 | 1.31360226 |
| chr10 | 68779472 | 68779531 | 60     | 1 | 1 | 1 | 0.01091641 | 3.9E-04    | 4 | 8 | 0.76005302 | 1.94674965 |
| chr10 | 68779531 | 68843366 | 63836  | 1 | 1 | 1 | 0.01091641 | 8.47E-04   | 4 | 7 | 0.76005302 | 1.62048027 |
| chr10 | 68843366 | 69064338 | 220973 | 6 | 1 | 1 | 0.00478973 | 8.47E-04   | 5 | 7 | 1.02643191 | 1.62048027 |
| chr10 | 69064338 | 69281681 | 217344 | 4 | 1 | 1 | 0.00478973 | 0.00204627 | 5 | 6 | 1.02643191 | 1.31360226 |
| chr10 | 69281681 | 69281740 | 60     | 1 | 2 | 0 | 0.00478973 | 0.00493743 | 5 | 7 | 1.02643191 | 1.16581773 |
| chr10 | 69281740 | 69408480 | 126741 | 1 | 2 | 1 | 0.00478973 | 0.01053319 | 5 | 6 | 1.02643191 | 0.91219088 |
| chr10 | 69408480 | 69408539 | 60     | 1 | 1 | 2 | 0.00478973 | 0.00493743 | 5 | 7 | 1.02643191 | 1.16581773 |
| chr10 | 69408539 | 69647176 | 238638 | 5 | 1 | 2 | 0.00478973 | 0.01053319 | 5 | 6 | 1.02643191 | 0.91219088 |
| chr10 | 69647176 | 69748511 | 101336 | 5 | 2 | 2 | 0.02162467 | 0.01053319 | 5 | 6 | 0.68214471 | 0.91219088 |
| chr10 | 69748511 | 69832863 | 84353  | 2 | 2 | 2 | 0.02162467 | 0.0429175  | 5 | 4 | 0.68214471 | 0.47744371 |
| chr10 | 69832863 | 69881541 | 48679  | 3 | 2 | 2 | 0.02162467 | 0.02162467 | 5 | 6 | 0.68214471 | 0.68214471 |
| chr10 | 69881541 | 69921538 | 39928  | 2 | 2 | 2 | 0.0429175  | 0.02162467 | 4 | 5 | 0.47744371 | 0.68214471 |
| chr10 | 69921538 | 69991540 | 70003  | 1 | 2 | 2 | 0.0429175  | 0.0429175  | 4 | 4 | 0.47744371 | 0.47744371 |
| chr10 | 69991540 | 69991596 | 57     | 1 | 2 | 2 | 0.02162467 | 0.0429175  | 5 | 4 | 0.68214471 | 0.47744371 |
| chr10 | 69991596 | 70094900 | 103305 | 2 | 2 | 2 | 0.0429175  | 0.0429175  | 4 | 4 | 0.47744371 | 0.47744371 |
| chr10 | 70094900 | 70100962 | 6063   | 2 | 3 | 2 | 0.10122019 | 0.0429175  | 4 | 4 | 0.30102999 | 0.47744371 |
| chr10 | 70100962 | 70229949 | 128988 | 3 | 2 | 2 | 0.0429175  | 0.0429175  | 4 | 4 | 0.47744371 | 0.47744371 |
| chr10 | 70229949 | 70230008 | 60     | 1 | 2 | 2 | 0.03070643 | 0.0429175  | 6 | 4 | 0.63695542 | 0.47744371 |
| chr10 | 70230008 | 70286588 | 56581  | 2 | 2 | 2 | 0.02162467 | 0.0429175  | 5 | 4 | 0.68214471 | 0.47744371 |
| chr10 | 70286588 | 70322043 | 35456  | 3 | 3 | 3 | 0.05670724 | 0.10122019 | 5 | 4 | 0.45545077 | 0.30102999 |
| chr10 | 70322043 | 70362973 | 40931  | 1 | 3 | 3 | 0.10122019 | 0.10122019 | 4 | 4 | 0.30102999 | 0.30102999 |
| chr10 | 70362973 | 70453499 | 90527  | 2 | 3 | 2 | 0.10122019 | 0.0429175  | 4 | 4 | 0.30102999 | 0.47744371 |
| chr10 | 70453499 | 70522116 | 68618  | 3 | 3 | 3 | 0.10122019 | 0.10122019 | 4 | 4 | 0.30102999 | 0.30102999 |
| chr10 | 70522116 | 70522175 | 60     | 1 | 3 | 3 | 0.05670724 | 0.10122019 | 5 | 4 | 0.45545077 | 0.30102999 |
| chr10 | 70522175 | 70554458 | 32284  | 1 | 3 | 2 | 0.10122019 | 0.08289318 | 4 | 3 | 0.30102999 | 0.30102999 |
| chr10 | 70554458 | 70618242 | 63785  | 1 | 2 | 2 | 0.0429175  | 0.08289318 | 4 | 3 | 0.30102999 | 0.30102999 |
| chr10 | 70618242 | 70764899 | 146658 | 9 | 2 | 2 | 0.0429175  | 0.0429175  | 4 | 4 | 0.47744371 | 0.47744371 |
| chr10 | 70764899 | 70848046 | 83148  | 2 | 2 | 2 | 0.0429175  | 0.08289318 | 4 | 4 | 0.47744371 | 0.30102999 |
| chr10 | 70848046 | 70900599 | 52554  | 3 | 2 | 2 | 0.02162467 | 0.0429175  | 5 | 4 | 0.68214471 | 0.47744371 |
| chr10 | 70900599 | 70900658 | 60     | 1 | 2 | 2 | 0.1053319  | 0.0429175  | 6 | 4 | 0.91219088 | 0.47744371 |
| chr10 | 70900658 | 71218296 | 317639 | 7 | 2 | 2 | 0.08289318 | 0.0429175  | 3 | 4 | 0.30102999 | 0.47744371 |
| chr10 | 71218296 | 71251810 | 33515  | 1 | 2 | 2 | 0.08289318 | 0.08289318 | 3 | 3 | 0.30102999 | 0.30102999 |
| chr10 | 71251810 | 71251869 | 60     | 1 | 2 | 2 | 0.0429175  | 0.08289318 | 3 | 4 | 0.47744371 | 0.30102999 |
| chr10 | 71251869 | 71333003 | 81135  | 1 | 2 | 2 | 0.0429175  | 0.1575501  | 4 | 2 | 0.47744371 | 0.1575501  |
| chr10 | 71333003 | 71516435 | 183433 | 2 | 2 | 2 | 0.08289318 | 0.1575501  | 3 | 2 | 0.30102999 | 0.1575501  |
| chr10 | 71516435 | 71563087 | 46653  | 2 | 2 | 2 | 0.0429175  | 0.08289318 | 4 | 3 | 0.30102999 | 0.30102999 |
| chr10 | 71563087 | 71588406 | 25320  | 2 | 3 | 2 | 0.10122019 | 0.0429175  | 4 | 4 | 0.30102999 | 0.47744371 |
| chr10 | 71588406 | 71647182 | 58777  | 1 | 2 | 2 | 0.0429175  | 0.0429175  | 4 | 4 | 0.47744371 | 0.47744371 |
| chr10 | 71647182 | 71846010 | 198829 | 6 | 3 | 2 | 0.10122019 | 0.0429175  | 4 | 4 | 0.30102999 | 0.47744371 |
| chr10 | 71846010 | 71898932 | 52923  | 2 | 3 | 2 | 0.17593012 | 0.0429175  | 3 | 4 | 0.17593012 | 0.47744371 |
| chr10 | 71898932 | 71898991 | 60     | 1 | 3 | 2 | 0.10122019 | 0.0429175  | 4 | 4 | 0.30102999 | 0.47744371 |
| chr10 | 71898991 | 71983416 | 84426  | 3 | 2 | 2 | 0.10122019 | 0.08289318 | 4 | 3 | 0.30102999 | 0.30102999 |
| chr10 | 71983416 | 72072838 | 89423  | 3 | 2 | 2 | 0.10122019 | 0.1575501  | 4 | 2 | 0.30102999 | 0.1575501  |
| chr10 | 72072838 | 72072897 | 60     | 1 | 3 | 2 | 0.05670724 | 0.08289318 | 5 | 3 | 0.45545077 | 0.30102999 |
| chr10 | 72072897 | 72138939 | 66043  | 1 | 3 | 2 | 0.05670724 | 0.1575501  | 2 | 2 | 0.45545077 | 0.1575501  |
| chr10 | 72138939 | 72169741 | 30803  | 1 | 2 | 2 | 0.08289318 | 0.1575501  | 3 | 2 | 0.30102999 | 0.1575501  |
| chr10 | 72169741 | 72198662 | 28922  | 2 | 2 | 2 | 0.08289318 | 0.08289318 | 3 | 3 | 0.30102999 | 0.30102999 |
| chr10 | 72198662 | 72282361 | 83700  | 2 | 2 | 2 | 0.08289318 | 0.1575501  | 3 | 2 | 0.30102999 | 0.1575501  |
| chr10 | 72282361 | 72327855 | 45495  | 2 | 2 | 2 | 0.10122019 | 0.1575501  | 2 | 2 | 0.30102999 | 0.1575501  |
| chr10 | 72327855 | 72327914 | 60     | 1 | 4 | 2 | 0.11390336 | 0.1575501  | 5 | 2 | 0.30102999 | 0.1575501  |
| chr10 | 72327914 | 72359372 | 31459  | 1 | 2 | 2 | 0.10122019 | 0.1575501  | 4 | 2 | 0.30102999 | 0.1575501  |
| chr10 | 72359372 | 72359916 | 545    | 2 | 3 | 2 | 0.10122019 | 0.08289318 | 4 | 3 | 0.30102999 | 0.30102999 |
| chr10 | 72359916 | 72604311 | 244396 | 4 | 4 | 4 | 0.10122019 | 0.1575501  | 4 | 4 | 0.30102999 | 0.1575501  |
| chr10 | 72604311 | 72646994 | 42684  | 4 | 3 | 2 | 0.17593012 | 0.1575501  | 2 | 2 | 0.17593012 | 0.1575501  |
| chr10 | 72646994 | 72681585 | 34592  | 1 | 2 | 2 | 0.30102999 | 0.1575501  | 2 | 2 | 0.08289318 | 0.1575501  |
| chr10 | 72681585 | 72681644 | 60     | 1 | 3 | 2 | 0.17593012 | 0.1575501  | 3 | 2 | 0.17593012 | 0.1575501  |
| chr10 | 72681644 | 72929328 | 247685 | 1 | 2 | 1 | 0.08289318 | 0.05404976 | 3 | 2 | 0.30102999 | 0.30102999 |
| chr10 | 72929328 | 72929387 | 60     | 1 | 2 | 1 | 0.02162467 | 0.02438896 | 3 | 3 | 0.68214471 | 0.51676182 |
| chr10 | 72929387 | 73028865 | 99479  | 1 | 2 | 1 | 0.0429175  | 0.02438896 | 4 | 3 | 0.47744371 | 0.51676182 |
| chr10 | 73028865 | 73120782 | 91918  | 3 | 3 | 2 | 0.10122019 | 0.08289318 | 3 | 3 | 0.30102999 | 0.30102999 |
| chr10 | 73120782 | 73122419 | 1638   | 2 | 3 | 2 | 0.10122019 | 0.0429175  | 4 | 4 | 0.30102999 | 0.47744371 |
| chr10 | 73122419 | 73148577 | 26159  | 1 | 2 | 2 | 0.0429175  | 0.0429175  | 4 | 4 | 0.47744371 | 0.47744371 |
| chr10 | 73148577 | 73148636 | 60     | 1 | 2 | 2 | 0.0429175  | 0.02162467 | 4 | 5 | 0.47744371 | 0.68214471 |
| chr10 | 73148636 | 73247632 | 89897  | 2 | 2 | 2 | 0.08289318 | 0.0429175  | 3 | 4 | 0.30102999 | 0.47744371 |
| chr10 | 73247632 | 73315953 | 68322  | 2 | 2 | 2 | 0.08289318 | 0.02162467 | 3 | 5 | 0.30102999 | 0.68214471 |
| chr10 | 73315953 | 73406500 | 90548  | 2 | 2 | 2 | 0.1575501  | 0.08289318 | 2 | 3 | 0.1575501  | 0.30102999 |
| chr10 | 73406500 | 73449787 | 43288  | 2 | 2 | 2 | 0.08289318 | 0.08289318 | 3 | 3 | 0.30102999 | 0.30102999 |
| chr10 | 73449787 | 73449846 | 60     | 1 | 2 | 2 | 0.0429175  | 0.0429175  | 4 | 4 | 0.47744371 | 0.47744371 |
| chr10 | 73449846 | 73514717 | 64872  | 1 | 2 | 2 | 0.0429175  | 0.08289318 | 4 | 3 | 0.30102999 | 0.30102999 |
| chr10 | 73514717 | 73514776 | 60     | 1 | 2 | 2 | 0.0429175  | 0.0429175  | 4 | 4 | 0.47744371 | 0.47744371 |
| chr10 | 73514776 | 73607502 | 92727  | 2 | 2 | 2 | 0.0429175  | 0.1575501  | 2 | 2 | 0.47744371 | 0.1575501  |
| chr10 | 73607502 | 73773238 | 165737 | 3 | 2 | 2 | 0.08289318 | 0.1575501  | 3 | 2 | 0.30102999 | 0.1575501  |
| chr10 | 73773238 | 73773297 | 60     | 1 | 3 | 2 | 0.08289318 | 0.30102999 | 2 | 2 | 0.30102999 | 0.08289318 |
| chr10 | 73773297 | 73887835 | 114539 | 5 | 2 | 2 | 0.08289318 | 0.1575501  | 3 | 2 | 0.30102999 | 0.1575501  |
| chr10 | 73887835 | 73975496 | 87662  | 3 |   |   |            |            |   |   |            |            |

|       |          |          |        |    |   |   |            |            |   |     |            |            |
|-------|----------|----------|--------|----|---|---|------------|------------|---|-----|------------|------------|
| chr10 | 76788268 | 76864463 | 76196  | 3  | 2 | 2 | 0.02162467 | 0.1575501  | 5 | 2   | 0.68214471 | 0.1575501  |
| chr10 | 76864463 | 76864515 | 53     | 1  | 2 | 3 | 0.02162467 | 0.30102999 | 5 | 2   | 0.68214471 | 0.08289318 |
| chr10 | 76864515 | 76936246 | 71732  | 2  | 2 | 3 | 0.0429175  | 0.30102999 | 4 | 2   | 0.47744371 | 0.08289318 |
| chr10 | 76936246 | 76977436 | 41191  | 2  | 2 | 3 | 0.08289318 | 0.30102999 | 3 | 2   | 0.30102999 | 0.08289318 |
| chr10 | 76977436 | 77272227 | 294792 | 7  | 2 | 3 | 0.0429175  | 0.30102999 | 4 | 2   | 0.47744371 | 0.08289318 |
| chr10 | 77272227 | 77272286 | 60     | 1  | 2 | 3 | 0.0429175  | 0.17593012 | 4 | 3   | 0.47744371 | 0.17593012 |
| chr10 | 77272286 | 77483984 | 211699 | 5  | 2 | 3 | 0.0429175  | 0.30102999 | 4 | 2   | 0.47744371 | 0.08289318 |
| chr10 | 77483984 | 77484043 | 60     | 1  | 2 | 4 | 0.0429175  | 0.47744371 | 4 | 2   | 0.47744371 | 0.0429175  |
| chr10 | 77484043 | 77889960 | 405918 | 8  | 2 | 4 | 0.0429175  | 0.30102999 | 4 | 2   | 0.47744371 | 0.08289318 |
| chr10 | 77889960 | 77890019 | 60     | 1  | 3 | 3 | 0.10122019 | 0.30102999 | 4 | 2   | 0.30102999 | 0.08289318 |
| chr10 | 77890019 | 78015106 | 125088 | 2  | 3 | 3 | 0.10122019 | 0.51676182 | 4 | 1   | 0.30102999 | 0.02438896 |
| chr10 | 78015106 | 78146147 | 131042 | 3  | 3 | 3 | 0.05670724 | 0.51676182 | 5 | 1   | 0.45545077 | 0.02438896 |
| chr10 | 78146147 | 78224874 | 78728  | 2  | 3 | 2 | 0.05670724 | 0.30102999 | 5 | 1   | 0.45545077 | 0.05404976 |
| chr10 | 78224874 | 78292060 | 61787  | 2  | 3 | 3 | 0.05670724 | 0.51676182 | 5 | 1   | 0.45545077 | 0.02438896 |
| chr10 | 78292060 | 78517951 | 225892 | 4  | 3 | 3 | 0.05670724 | 0.17593012 | 5 | 3   | 0.45545077 | 0.17593012 |
| chr10 | 78517951 | 78518010 | 60     | 1  | 3 | 4 | 0.05670724 | 0.30102999 | 5 | 3   | 0.45545077 | 0.10122019 |
| chr10 | 78518010 | 78644080 | 126071 | 2  | 2 | 3 | 0.02162467 | 0.17593012 | 5 | 3   | 0.68214471 | 0.17593012 |
| chr10 | 78644080 | 78644139 | 60     | 1  | 3 | 4 | 0.03070643 | 0.30102999 | 6 | 3   | 0.63695542 | 0.10122019 |
| chr10 | 78644139 | 78687209 | 43071  | 1  | 2 | 4 | 0.01053319 | 0.30102999 | 6 | 3   | 0.91219088 | 0.10122019 |
| chr10 | 78687209 | 78839253 | 152045 | 3  | 2 | 3 | 0.01053319 | 0.17593012 | 6 | 3   | 0.91219088 | 0.17593012 |
| chr10 | 78839253 | 78839312 | 60     | 1  | 2 | 4 | 0.01053319 | 0.30102999 | 6 | 3   | 0.91219088 | 0.10122019 |
| chr10 | 78839312 | 79047382 | 208071 | 5  | 2 | 3 | 0.01053319 | 0.17593012 | 6 | 3   | 0.91219088 | 0.17593012 |
| chr10 | 79047382 | 79117234 | 69853  | 1  | 2 | 3 | 0.02162467 | 0.17593012 | 5 | 2   | 0.68214471 | 0.17593012 |
| chr10 | 79117234 | 79158563 | 41330  | 2  | 2 | 4 | 0.02162467 | 0.30102999 | 5 | 3   | 0.68214471 | 0.10122019 |
| chr10 | 79158563 | 79212583 | 54021  | 2  | 2 | 4 | 0.01053319 | 0.30102999 | 6 | 3   | 0.91219088 | 0.10122019 |
| chr10 | 79212583 | 79384197 | 171615 | 4  | 2 | 3 | 0.02162467 | 0.17593012 | 5 | 3   | 0.68214471 | 0.17593012 |
| chr10 | 79384197 | 79625278 | 241082 | 6  | 2 | 3 | 0.02162467 | 0.10122019 | 5 | 4   | 0.68214471 | 0.30102999 |
| chr10 | 79625278 | 79661733 | 36456  | 2  | 2 | 2 | 0.02162467 | 0.0429175  | 5 | 4   | 0.68214471 | 0.47744371 |
| chr10 | 79661733 | 79764590 | 102858 | 2  | 2 | 1 | 0.02162467 | 0.01091641 | 5 | 4   | 0.68214471 | 0.76005302 |
| chr10 | 79764590 | 79799851 | 35262  | 1  | 1 | 2 | 0.02162467 | 0.02438896 | 5 | 3   | 0.68214471 | 0.51676182 |
| chr10 | 79799851 | 79799910 | 60     | 1  | 2 | 2 | 0.02162467 | 0.08289318 | 5 | 3   | 0.68214471 | 0.30102999 |
| chr10 | 79799910 | 79891132 | 91223  | 1  | 1 | 2 | 0.0429175  | 0.02438896 | 4 | 3   | 0.47744371 | 0.51676182 |
| chr10 | 79891132 | 80048946 | 157815 | 1  | 1 | 1 | 0.01091641 | 0.02438896 | 4 | 3   | 0.76005302 | 0.51676182 |
| chr10 | 80048946 | 80049005 | 60     | 1  | 1 | 3 | 0.00478973 | 0.05670724 | 5 | 5   | 1.02643191 | 0.45545077 |
| chr10 | 80049005 | 80103108 | 54104  | 1  | 1 | 1 | 0.00478973 | 0.02438896 | 5 | 3   | 1.02643191 | 0.51676182 |
| chr10 | 80103108 | 80171813 | 68706  | 2  | 2 | 1 | 0.02162467 | 0.02438896 | 5 | 3   | 0.68214471 | 0.51676182 |
| chr10 | 80171813 | 80171872 | 60     | 1  | 2 | 2 | 0.02162467 | 0.02162467 | 5 | 5   | 0.68214471 | 0.68214471 |
| chr10 | 80171872 | 80270710 | 98839  | 1  | 1 | 2 | 0.00478973 | 0.0429175  | 5 | 4   | 1.02643191 | 0.47744371 |
| chr10 | 80270710 | 80381611 | 110902 | 2  | 2 | 2 | 0.02162467 | 0.0429175  | 4 | 4   | 0.68214471 | 0.47744371 |
| chr10 | 80381611 | 80597690 | 216080 | 2  | 2 | 0 | 0.02162467 | 0.02162467 | 5 | 3   | 0.68214471 | 0.93173516 |
| chr10 | 80597690 | 80597749 | 60     | 1  | 1 | 0 | 0.02162467 | 0.01091641 | 5 | 4   | 0.68214471 | 0.76005302 |
| chr10 | 80597749 | 80779547 | 181799 | 2  | 1 | 0 | 0.01091641 | 0.02438896 | 4 | 3   | 0.93173516 | 0.76005302 |
| chr10 | 80779547 | 80779606 | 60     | 1  | 1 | 1 | 0.01091641 | 0.00478973 | 4 | 5   | 0.76005302 | 1.02643191 |
| chr10 | 80779606 | 80846709 | 67104  | 1  | 0 | 0 | 0.01091641 | 0          | 4 | 4   | 0.76005302 | 1.26272838 |
| chr10 | 80846709 | 81051168 | 204460 | 4  | 1 | 0 | 0.01091641 | 0          | 4 | 3   | 0.76005302 | 0.93173516 |
| chr10 | 81051168 | 81154741 | 103574 | 4  | 2 | 1 | 0.02162467 | 0.02438896 | 5 | 3   | 0.68214471 | 0.51676182 |
| chr10 | 81154741 | 81154800 | 60     | 1  | 2 | 1 | 0.02162467 | 0.01091641 | 5 | 4   | 0.68214471 | 0.76005302 |
| chr10 | 81154800 | 81697501 | 542702 | 2  | 2 | 1 | 0.02162467 | 0.1218695  | 5 | 1   | 0.68214471 | 0.1218695  |
| chr10 | 81697501 | 81702930 | 5430   | 2  | 3 | 1 | 0.03070643 | 0.1218695  | 6 | 1   | 0.63695542 | 0.1218695  |
| chr10 | 81702930 | 81873133 | 170204 | 5  | 3 | 1 | 0.03070643 | 0.05404976 | 6 | 2   | 0.63695542 | 0.30102999 |
| chr10 | 81873133 | 81958740 | 85608  | 3  | 3 | 1 | 0.01592858 | 0.05404976 | 7 | 2   | 0.84395715 | 0.30102999 |
| chr10 | 81958740 | 82109919 | 151180 | 2  | 3 | 1 | 0.10122019 | 0.1218695  | 4 | 1   | 0.30102999 | 0.1218695  |
| chr10 | 82109919 | 82109978 | 60     | 1  | 3 | 1 | 0.05670724 | 0.1218695  | 5 | 1   | 0.45545077 | 0.1218695  |
| chr10 | 82109978 | 82718756 | 608779 | 11 | 2 | 3 | 0.0429175  | 0.1218695  | 4 | 1   | 0.47744371 | 0.1218695  |
| chr10 | 82718756 | 82860481 | 141726 | 2  | 2 | 1 | 0.02162467 | 0.1218695  | 5 | 1   | 0.68214471 | 0.1218695  |
| chr10 | 82860481 | 82860540 | 60     | 1  | 2 | 2 | 0.02162467 | 0.30102999 | 5 | 1   | 0.68214471 | 0.05404976 |
| chr10 | 82860540 | 82947948 | 87409  | 1  | 2 | 2 | 0.0429175  | 0.30102999 | 4 | 1   | 0.47744371 | 0.05404976 |
| chr10 | 82947948 | 83278097 | 330150 | 2  | 2 | 1 | 0.0429175  | 0.1218695  | 4 | 1   | 0.47744371 | 0.1218695  |
| chr10 | 83278097 | 83485997 | 207901 | 1  | 2 | 1 | 0.08289318 | 0.1218695  | 3 | 1   | 0.30102999 | 0.1218695  |
| chr10 | 83485997 | 83662567 | 176571 | 2  | 2 | 1 | 0.08289318 | 0.05404976 | 3 | 2   | 0.30102999 | 0.30102999 |
| chr10 | 83662567 | 83662626 | 60     | 1  | 2 | 2 | 0.08289318 | 0.08289318 | 3 | 3   | 0.30102999 | 0.30102999 |
| chr10 | 83662626 | 83719119 | 56494  | 1  | 2 | 1 | 0.08289318 | 0.02438896 | 3 | 3   | 0.30102999 | 0.51676182 |
| chr10 | 83719119 | 83799128 | 80010  | 3  | 2 | 1 | 0.08289318 | 0.01091641 | 3 | 4   | 0.30102999 | 0.76005302 |
| chr10 | 83799128 | 84098620 | 299493 | 5  | 2 | 1 | 0.1575501  | 0.01091641 | 4 | 4   | 0.76005302 | 0.76005302 |
| chr10 | 84098620 | 84098679 | 60     | 1  | 2 | 2 | 0.02162467 | 0.0429175  | 5 | 4   | 0.68214471 | 0.47744371 |
| chr10 | 84098679 | 84179145 | 80467  | 2  | 2 | 1 | 0.0429175  | 0.01091641 | 4 | 4   | 0.47744371 | 0.76005302 |
| chr10 | 84179145 | 84332776 | 53632  | 2  | 1 | 2 | 0.0429175  | 0.02438896 | 4 | 3   | 0.47744371 | 0.51676182 |
| chr10 | 84332776 | 84332835 | 60     | 1  | 2 | 1 | 0.02162467 | 0.02438896 | 5 | 3   | 0.68214471 | 0.51676182 |
| chr10 | 84332835 | 84561595 | 328761 | 5  | 2 | 1 | 0.0429175  | 0.02438896 | 4 | 3   | 0.47744371 | 0.51676182 |
| chr10 | 84561595 | 84696018 | 134424 | 3  | 2 | 1 | 0.0429175  | 0.01091641 | 4 | 4   | 0.47744371 | 0.76005302 |
| chr10 | 84696018 | 84783427 | 87410  | 1  | 2 | 1 | 0.08289318 | 0.02438896 | 3 | 3   | 0.30102999 | 0.51676182 |
| chr10 | 84783427 | 84835236 | 51810  | 1  | 1 | 1 | 0.1218695  | 0.02438896 | 1 | 3   | 0.1218695  | 0.51676182 |
| chr10 | 84835236 | 84973951 | 138716 | 1  | 1 | 1 | 0.1218695  | 0.05404976 | 1 | 2   | 0.1218695  | 0.30102999 |
| chr10 | 84973951 | 84974010 | 60     | 1  | 1 | 1 | 0.05404976 | 0.01091641 | 2 | 4   | 0.30102999 | 0.76005302 |
| chr10 | 84974010 | 85091232 | 117223 | 1  | 1 | 1 | 0.1218695  | 0.01091641 | 1 | 4   | 0.1218695  | 0.76005302 |
| chr10 | 85091232 | 85091291 | 60     | 1  | 2 | 2 | 0.02438896 | 0.02162467 | 3 | 5   | 0.51676182 | 0.68214471 |
| chr10 | 85091291 | 85283970 | 192680 | 2  | 2 | 0 | 0.30102999 | 0.0429175  | 0 | 0   | 0.47744371 | 0.47744371 |
| chr10 | 85283970 | 85284029 | 60     | 1  | 2 | 2 | 0.08289318 | 0.02162467 | 3 | 5   | 0.30102999 | 0.68214471 |
| chr10 | 85284029 | 85484389 | 200361 | 1  | 1 | 1 | 0.05404976 | 0.02438896 | 2 | 3   | 0.30102999 | 0.51676182 |
| chr10 | 85484389 | 85531316 | 46928  | 2  | 1 | 1 | 0.05404976 | 0.01091641 | 2 | 4   | 0.30102999 | 0.76005302 |
| chr10 | 85531316 | 85806428 | 275113 | 2  | 1 | 1 | 0.05404976 | 0.02438896 | 2 | 3   | 0.30102999 | 0.51676182 |
| chr10 | 85806428 | 85806487 | 60     | 1  | 1 | 1 | 0.02438896 | 0.01091641 | 3 | 4   | 0.51676182 | 0.76005302 |
| chr10 | 85806487 | 86134794 | 328308 | 10 | 1 | 1 | 0.1218695  | 0.01091641 | 1 | 4   | 0.1218695  | 0.76005302 |
| chr10 | 86134794 | 86276904 | 142111 | 4  | 1 | 1 | 0.30102999 | 0.01091641 | 0 | 4   | 0          | 0.76005302 |
| chr10 | 86276904 | 86276963 | 60     | 1  | 1 | 1 | 0.1218695  | 0.01091641 | 1 | 4   | 0.1218695  | 0.76005302 |
| chr10 | 86276963 | 86461676 | 184714 | 2  | 1 | 1 | 0.30102999 | 0.01091641 | 0 | 0   | 0          | 0.76005302 |
| chr10 | 86461676 | 86710999 | 249324 | 2  | 1 | 1 | 0.30102999 | 0.00478973 | 0 | 5   | 0          | 1.02643191 |
| chr10 | 86710999 | 86863692 | 152694 | 2  | 1 | 2 | 0.1218695  | 0.01053319 | 1 | 6   | 0.1218695  | 0.91219088 |
| chr10 | 86863692 | 86863751 | 60     | 1  | 1 | 3 | 0.05404976 | 0.1598258  | 2 | 7   | 0.30102999 | 0.84395715 |
| chr10 | 86863751 | 87012456 | 148706 | 1  | 1 | 3 | 0.1218695  | 0.03070643 | 1 | 6</ |            |            |

|       |          |          |        |    |   |   |            |            |   |    |            |            |
|-------|----------|----------|--------|----|---|---|------------|------------|---|----|------------|------------|
| chr10 | 90708111 | 90775321 | 67211  | 3  | 3 | 4 | 0.30102999 | 0.02074938 | 2 | 8  | 0.08289318 | 0.79906872 |
| chr10 | 90775321 | 90965786 | 190466 | 2  | 3 | 4 | 0.51676182 | 0.02074938 | 1 | 8  | 0.02438896 | 0.79906872 |
| chr10 | 90965786 | 91003286 | 37501  | 2  | 3 | 5 | 0.51676182 | 0.04407651 | 1 | 8  | 0.02438896 | 0.58747015 |
| chr10 | 91003286 | 91483662 | 480377 | 14 | 3 | 4 | 0.51676182 | 0.02074938 | 1 | 8  | 0.02438896 | 0.79906872 |
| chr10 | 91483662 | 91534283 | 50622  | 2  | 3 | 4 | 0.93173516 | 0.02074938 | 0 | 8  | 0          | 0.79906872 |
| chr10 | 91534283 | 91730726 | 196444 | 2  | 3 | 4 | 0.93173516 | 0.11390336 | 0 | 5  | 0          | 0.30102999 |
| chr10 | 91730726 | 92095432 | 364707 | 3  | 3 | 3 | 0.93173516 | 0.05670724 | 0 | 5  | 0          | 0.45545077 |
| chr10 | 92095432 | 92095491 | 60     | 1  | 3 | 4 | 0.93173516 | 0.06713722 | 0 | 6  | 0          | 0.44141547 |
| chr10 | 92095491 | 92191579 | 96089  | 1  | 3 | 3 | 0.93173516 | 0.03070643 | 0 | 6  | 0          | 0.63695542 |
| chr10 | 92191579 | 92191638 | 60     | 1  | 3 | 3 | 0.93173516 | 0.01598258 | 0 | 7  | 0          | 0.84395715 |
| chr10 | 92191638 | 92264113 | 72476  | 1  | 3 | 2 | 0.93173516 | 0.01053319 | 0 | 6  | 0          | 0.91219088 |
| chr10 | 92264113 | 92363552 | 99440  | 1  | 3 | 2 | 0.93173516 | 0.02162467 | 0 | 5  | 0          | 0.68214471 |
| chr10 | 92363552 | 92363611 | 60     | 1  | 3 | 3 | 0.93173516 | 0.05670724 | 0 | 5  | 0          | 0.45545077 |
| chr10 | 92363611 | 92480156 | 116546 | 1  | 2 | 3 | 0.61140001 | 0.05670724 | 0 | 5  | 0          | 0.45545077 |
| chr10 | 92480156 | 92532862 | 52707  | 2  | 2 | 3 | 0.61140001 | 0.03070643 | 0 | 6  | 0          | 0.63695542 |
| chr10 | 92532862 | 92532921 | 60     | 1  | 2 | 4 | 0.61140001 | 0.06713722 | 0 | 6  | 0          | 0.44141547 |
| chr10 | 92532921 | 92594832 | 61912  | 1  | 2 | 3 | 0.61140001 | 0.05670724 | 0 | 5  | 0          | 0.45545077 |
| chr10 | 92594832 | 92655612 | 60781  | 2  | 2 | 3 | 0.61140001 | 0.03070643 | 0 | 6  | 0          | 0.63695542 |
| chr10 | 92655612 | 92680452 | 24841  | 2  | 2 | 5 | 0.61140001 | 0.12309572 | 0 | 6  | 0          | 0.30102999 |
| chr10 | 92680452 | 92823852 | 143401 | 3  | 2 | 5 | 0.61140001 | 0.07511598 | 0 | 7  | 0          | 0.43181735 |
| chr10 | 92823852 | 92823911 | 60     | 1  | 3 | 5 | 0.93173516 | 0.07511598 | 0 | 7  | 0          | 0.43181735 |
| chr10 | 92823911 | 92850376 | 126466 | 2  | 2 | 5 | 0.61140001 | 0.07511598 | 0 | 7  | 0          | 0.43181735 |
| chr10 | 92850376 | 93008446 | 58071  | 4  | 2 | 5 | 0.61140001 | 0.04407651 | 0 | 8  | 0          | 0.58747015 |
| chr10 | 93008446 | 93041536 | 33091  | 2  | 3 | 6 | 0.51676182 | 0.08122616 | 1 | 8  | 0.02438896 | 0.4250187  |
| chr10 | 93041536 | 93126781 | 85246  | 1  | 2 | 6 | 0.61140001 | 0.08122616 | 0 | 8  | 0          | 0.4250187  |
| chr10 | 93126781 | 93126840 | 60     | 1  | 2 | 6 | 0.61140001 | 0.02793176 | 0 | 10 | 0          | 0.74627054 |
| chr10 | 93126840 | 93204666 | 77827  | 1  | 1 | 6 | 0.30102999 | 0.02793176 | 0 | 10 | 0          | 0.74627054 |
| chr10 | 93204666 | 93272363 | 67698  | 2  | 1 | 6 | 0.30102999 | 0.08122616 | 0 | 8  | 0          | 0.4250187  |
| chr10 | 93272363 | 93306009 | 33647  | 2  | 2 | 6 | 0.61140001 | 0.08122616 | 0 | 8  | 0          | 0.4250187  |
| chr10 | 93306009 | 93306068 | 60     | 1  | 3 | 6 | 0.93173516 | 0.04875589 | 0 | 9  | 0          | 0.57322028 |
| chr10 | 93306068 | 93390021 | 83954  | 1  | 3 | 6 | 0.93173516 | 0.08122616 | 0 | 8  | 0          | 0.4250187  |
| chr10 | 93390021 | 93517827 | 127807 | 4  | 3 | 6 | 0.51676182 | 0.08122616 | 1 | 8  | 0.02438896 | 0.4250187  |
| chr10 | 93517827 | 93590753 | 72927  | 1  | 3 | 6 | 0.93173516 | 0.129931   | 0 | 7  | 0          | 0.30102999 |
| chr10 | 93590753 | 93667685 | 76933  | 2  | 3 | 6 | 0.93173516 | 0.07511598 | 0 | 7  | 0          | 0.43181735 |
| chr10 | 93667685 | 93667744 | 60     | 1  | 3 | 5 | 0.93173516 | 0.04407651 | 0 | 8  | 0          | 0.58747015 |
| chr10 | 93667744 | 93748941 | 81198  | 2  | 3 | 5 | 0.93173516 | 0.12309572 | 0 | 6  | 0          | 0.30102999 |
| chr10 | 93748941 | 93749000 | 60     | 1  | 3 | 5 | 0.93173516 | 0.07511598 | 0 | 7  | 0          | 0.43181735 |
| chr10 | 93749000 | 93789925 | 40926  | 1  | 3 | 5 | 0.93173516 | 0.12309572 | 0 | 6  | 0          | 0.30102999 |
| chr10 | 93789925 | 93854943 | 65019  | 1  | 2 | 5 | 0.61140001 | 0.12309572 | 0 | 6  | 0          | 0.30102999 |
| chr10 | 93854943 | 93904872 | 49930  | 2  | 2 | 5 | 0.1575501  | 0.04407651 | 2 | 8  | 0.1575501  | 0.58747015 |
| chr10 | 93904872 | 93952270 | 47399  | 1  | 2 | 4 | 0.1575501  | 0.06713722 | 2 | 6  | 0.1575501  | 0.44141547 |
| chr10 | 93952270 | 94002962 | 50693  | 2  | 2 | 4 | 0.61140001 | 0.11390336 | 0 | 5  | 0          | 0.30102999 |
| chr10 | 94002962 | 94056824 | 53863  | 2  | 2 | 4 | 0.61140001 | 0.06713722 | 0 | 6  | 0          | 0.44141547 |
| chr10 | 94056824 | 94056883 | 60     | 1  | 2 | 4 | 0.61140001 | 0.02074938 | 0 | 8  | 0          | 0.79906872 |
| chr10 | 94056883 | 94138456 | 81574  | 2  | 1 | 4 | 0.30102999 | 0.02074938 | 0 | 8  | 0          | 0.79906872 |
| chr10 | 94138456 | 94214092 | 75637  | 1  | 1 | 4 | 0.30102999 | 0.03812622 | 0 | 7  | 0          | 0.60763643 |
| chr10 | 94214092 | 94269846 | 55755  | 2  | 2 | 4 | 0.30102999 | 0.03812622 | 0 | 7  | 0.05404976 | 0.60763643 |
| chr10 | 94269846 | 94348354 | 78509  | 2  | 2 | 4 | 0.30102999 | 0.06713722 | 1 | 6  | 0.05404976 | 0.44141547 |
| chr10 | 94348354 | 94393412 | 45059  | 1  | 0 | 4 | 0          | 0.06713722 | 0 | 6  | 0          | 0.44141547 |
| chr10 | 94393412 | 94610553 | 21714  | 4  | 0 | 4 | 0          | 0.01077081 | 0 | 9  | 0          | 1.01542894 |
| chr10 | 94610553 | 94669263 | 58711  | 2  | 0 | 5 | 0          | 0.02473314 | 0 | 9  | 0          | 0.76806864 |
| chr10 | 94669263 | 94669322 | 60     | 1  | 1 | 5 | 0.30102999 | 0.01320236 | 0 | 10 | 0          | 0.97390707 |
| chr10 | 94669322 | 94759139 | 89818  | 2  | 0 | 5 | 0          | 0.01320236 | 0 | 10 | 0          | 0.97390707 |
| chr10 | 94759139 | 95126196 | 367058 | 11 | 1 | 5 | 0.30102999 | 0.01320236 | 0 | 10 | 0          | 0.97390707 |
| chr10 | 95126196 | 95126255 | 60     | 1  | 1 | 5 | 0.1218695  | 0.01320236 | 1 | 10 | 0.1218695  | 0.97390707 |
| chr10 | 95126255 | 95185893 | 59639  | 2  | 1 | 5 | 0.1218695  | 0.04407651 | 1 | 8  | 0.1218695  | 0.58747015 |
| chr10 | 95185893 | 95216629 | 30737  | 2  | 1 | 5 | 0.1218695  | 0.02473314 | 1 | 9  | 0.1218695  | 0.76806864 |
| chr10 | 95216629 | 95287995 | 71367  | 2  | 1 | 5 | 0.1218695  | 0.01320236 | 1 | 10 | 0.1218695  | 0.97390707 |
| chr10 | 95287995 | 95335973 | 47979  | 2  | 2 | 5 | 0.30102999 | 0.01320236 | 1 | 10 | 0.05404976 | 0.97390707 |
| chr10 | 95335973 | 95380478 | 44506  | 2  | 1 | 5 | 0.30102999 | 0.01320236 | 1 | 10 | 0          | 0.97390707 |
| chr10 | 95380478 | 95380537 | 60     | 1  | 1 | 5 | 0.1218695  | 0.01320236 | 1 | 10 | 0.1218695  | 0.97390707 |
| chr10 | 95380537 | 95490522 | 109986 | 3  | 1 | 5 | 0.30102999 | 0.01320236 | 0 | 10 | 0          | 0.97390707 |
| chr10 | 95490522 | 95490581 | 60     | 1  | 1 | 6 | 0.30102999 | 0.02793176 | 0 | 10 | 0          | 0.74627054 |
| chr10 | 95490581 | 95518049 | 27469  | 1  | 4 | 6 | 0.30102999 | 0.00530918 | 0 | 10 | 0          | 1.2568129  |
| chr10 | 95518049 | 95557430 | 39382  | 2  | 1 | 4 | 0.1218695  | 0.00530918 | 1 | 10 | 0.1218695  | 1.2568129  |
| chr10 | 95557430 | 95557489 | 60     | 1  | 1 | 4 | 0.1218695  | 0.01320236 | 1 | 10 | 0.1218695  | 0.97390707 |
| chr10 | 95557489 | 95667849 | 110361 | 3  | 1 | 4 | 0.30102999 | 0.00530918 | 0 | 10 | 0          | 1.2568129  |
| chr10 | 95667849 | 95790945 | 123097 | 3  | 1 | 4 | 0.30102999 | 0.01077081 | 0 | 9  | 0          | 1.01542894 |
| chr10 | 95790945 | 95855990 | 165046 | 3  | 1 | 4 | 0.30102999 | 0.02074938 | 0 | 8  | 0          | 0.79906872 |
| chr10 | 95855990 | 95895733 | 39744  | 1  | 1 | 4 | 0.30102999 | 0.03812622 | 0 | 7  | 0          | 0.60763643 |
| chr10 | 95895733 | 96044614 | 48882  | 1  | 1 | 4 | 0.30102999 | 0.06713722 | 0 | 6  | 0          | 0.44141547 |
| chr10 | 96044614 | 96161373 | 116760 | 3  | 1 | 4 | 0.30102999 | 0.03812622 | 0 | 7  | 0          | 0.60763643 |
| chr10 | 96161373 | 96407740 | 246368 | 6  | 1 | 4 | 0.30102999 | 0.06713722 | 0 | 6  | 0          | 0.44141547 |
| chr10 | 96407740 | 96540436 | 132697 | 4  | 1 | 4 | 0.1218695  | 0.06713722 | 1 | 6  | 0.1218695  | 0.44141547 |
| chr10 | 96540436 | 96540495 | 60     | 1  | 1 | 5 | 0.1218695  | 0.07511598 | 1 | 7  | 0.1218695  | 0.43181735 |
| chr10 | 96540495 | 96612764 | 72270  | 2  | 1 | 5 | 0.1218695  | 0.12309572 | 1 | 6  | 0.1218695  | 0.30102999 |
| chr10 | 96612764 | 96750804 | 138041 | 2  | 1 | 4 | 0.1218695  | 0.06713722 | 1 | 6  | 0.1218695  | 0.44141547 |
| chr10 | 96750804 | 96750863 | 60     | 1  | 1 | 4 | 0.1218695  | 0.03812622 | 1 | 7  | 0.1218695  | 0.60763643 |
| chr10 | 96750863 | 96828377 | 77515  | 1  | 1 | 4 | 0.1218695  | 0.06713722 | 1 | 6  | 0.1218695  | 0.44141547 |
| chr10 | 96828377 | 96872364 | 43988  | 3  | 1 | 4 | 0.1218695  | 0.03812622 | 1 | 7  | 0.1218695  | 0.60763643 |
| chr10 | 96872364 | 97021441 | 149078 | 4  | 1 | 4 | 0.1218695  | 0.02074938 | 1 | 8  | 0.1218695  | 0.79906872 |
| chr10 | 97021441 | 97250768 | 229328 | 5  | 1 | 4 | 0.1218695  | 0.03812622 | 1 | 7  | 0.1218695  | 0.60763643 |
| chr10 | 97250768 | 97315278 | 64511  | 3  | 1 | 4 | 0.1218695  | 0.02074938 | 1 | 8  | 0.1218695  | 0.79906872 |
| chr10 | 97315278 | 97413126 | 97849  | 2  | 1 | 4 | 0.30102999 | 0.02074938 | 0 | 8  | 0          | 0.79906872 |
| chr10 | 97413126 | 97452727 | 39602  | 3  | 1 | 4 | 0.1218695  | 0.02074938 | 0 | 8  | 0.1218695  | 0.79906872 |
| chr10 | 97452727 | 97515782 | 63056  | 2  | 1 | 4 | 0.30102999 | 0.02074938 | 0 | 8  | 0          | 0.79906872 |
| chr10 | 97515782 | 97515834 | 53     | 1  | 1 | 4 | 0.30102999 | 0.01077081 | 0 | 9  | 0          | 1.01542894 |
| chr10 | 97515834 | 97583033 | 67200  | 2  | 1 | 4 | 0.30102999 | 0.02074938 | 0 | 8  | 0          | 0.79906872 |
| chr10 | 97583033 | 97640044 | 57012  | 1  | 1 | 4 | 0.30102999 | 0.03812622 | 0 | 7  | 0          | 0.60763643 |
| chr10 | 97640044 | 97870342 | 230299 | 7  | 1 | 4 | 0.1218695  | 0.02074938 | 0 | 8  | 0.1218695  | 0.79906872 |
| chr10 | 97870342 | 97870401 | 60     | 1  | 1 | 4 | 0.1218695  | 0.01077081 | 1 | 9  | 0.1218695  | 1.01542894 |
| chr10 | 97870401 | 97951720 | 81320  | 2  | 1 | 4 | 0.30102999 | 0.01077081 | 0 | 9  | 0          | 1.01542894 |
| chr10 | 97951720 | 97951779 | 60     | 1  | 1 | 4 | 0.1218695  | 0.01077081 | 1 | 9  | 0.1218695  | 1.01542894 |
| chr10 | 97951779 | 98108056 | 156278 | 3  | 1 | 4 | 0.30102999 | 0          |   |    |            |            |

|       |           |           |        |    |   |   |            |            |   |    |            |            |
|-------|-----------|-----------|--------|----|---|---|------------|------------|---|----|------------|------------|
| chr10 | 99990664  | 100074141 | 83478  | 2  | 1 | 7 | 0.30102999 | 0.00859896 | 0 | 13 | 0          | 1.14735594 |
| chr10 | 100074141 | 100074200 | 60     | 1  | 1 | 7 | 0.30102999 | 0.00413023 | 0 | 14 | 0          | 1.39918918 |
| chr10 | 100074200 | 100164382 | 90183  | 2  | 1 | 6 | 0.30102999 | 0.00373523 | 0 | 13 | 0          | 1.42397267 |
| chr10 | 100164382 | 100470191 | 305810 | 9  | 1 | 4 | 0.30102999 | 0.00247414 | 0 | 11 | 0          | 1.52371709 |
| chr10 | 100470191 | 100536851 | 66661  | 2  | 1 | 4 | 0.30102999 | 0.00530919 | 0 | 10 | 0          | 1.25681219 |
| chr10 | 100536851 | 100667784 | 130934 | 4  | 1 | 4 | 0.30102999 | 0.00247414 | 0 | 11 | 0          | 1.52371709 |
| chr10 | 100667784 | 100960668 | 292885 | 6  | 1 | 4 | 0.30102999 | 0.00530919 | 0 | 10 | 0          | 1.25681219 |
| chr10 | 100960668 | 100960727 | 60     | 1  | 1 | 4 | 0.30102999 | 0.00247414 | 0 | 11 | 0          | 1.52371709 |
| chr10 | 100960727 | 101128142 | 167416 | 4  | 1 | 4 | 0.30102999 | 0.00530919 | 0 | 10 | 0          | 1.25681219 |
| chr10 | 101128142 | 101170066 | 41925  | 2  | 1 | 4 | 0.30102999 | 0.00247414 | 0 | 11 | 0          | 1.52371709 |
| chr10 | 101170066 | 101193346 | 23281  | 1  | 1 | 4 | 0.30102999 | 0.00530919 | 0 | 10 | 0          | 1.25681219 |
| chr10 | 101193346 | 101294355 | 101010 | 1  | 0 | 4 | 0          | 0.00530919 | 0 | 10 | 0          | 1.25681219 |
| chr10 | 101294355 | 101294414 | 60     | 1  | 0 | 6 | 0          | 0.02793176 | 0 | 10 | 0          | 0.74627054 |
| chr10 | 101294414 | 101514267 | 219854 | 7  | 0 | 5 | 0          | 0.01320236 | 0 | 10 | 0          | 0.97390707 |
| chr10 | 101514267 | 101542596 | 28330  | 2  | 0 | 6 | 0          | 0.02793176 | 0 | 10 | 0          | 0.74627054 |
| chr10 | 101542596 | 101542655 | 60     | 1  | 0 | 6 | 0          | 0.01518174 | 0 | 11 | 0          | 0.9449689  |
| chr10 | 101542655 | 101704515 | 161861 | 4  | 0 | 4 | 0          | 0.00530919 | 0 | 10 | 0          | 1.25681219 |
| chr10 | 101704515 | 101704574 | 60     | 1  | 1 | 4 | 0.30102999 | 0.00530919 | 0 | 10 | 0          | 1.25681219 |
| chr10 | 101704574 | 101802101 | 97528  | 2  | 1 | 3 | 0.30102999 | 0.00170589 | 0 | 10 | 0          | 1.61091002 |
| chr10 | 101802101 | 101992529 | 190429 | 10 | 1 | 4 | 0.30102999 | 0.00530919 | 0 | 10 | 0          | 1.25681219 |
| chr10 | 101992529 | 102052328 | 59800  | 3  | 1 | 3 | 0          | 0.00378107 | 0 | 9  | 0          | 1.33111237 |
| chr10 | 102052328 | 102080193 | 27866  | 2  | 0 | 4 | 0          | 0.00530919 | 0 | 10 | 0          | 1.25681219 |
| chr10 | 102080193 | 102113993 | 33801  | 1  | 0 | 4 | 0          | 0.01077081 | 0 | 9  | 0          | 1.01542894 |
| chr10 | 102113993 | 102190585 | 76593  | 1  | 0 | 3 | 0          | 0.00378107 | 0 | 9  | 0          | 1.33111237 |
| chr10 | 102190585 | 102309789 | 119205 | 6  | 0 | 2 | 0          | 9.54E-04   | 0 | 9  | 0          | 1.74076927 |
| chr10 | 102309789 | 102428425 | 118637 | 1  | 0 | 2 | 0          | 0.00221948 | 0 | 8  | 0          | 1.44210395 |
| chr10 | 102428425 | 102516459 | 88035  | 2  | 0 | 4 | 0          | 0.02074938 | 0 | 0  | 0          | 0.79906872 |
| chr10 | 102516459 | 102516518 | 60     | 1  | 0 | 4 | 0          | 0.01077081 | 0 | 9  | 0          | 1.01542894 |
| chr10 | 102516518 | 102676543 | 160026 | 3  | 0 | 3 | 0          | 0.00378107 | 0 | 9  | 0          | 1.33111237 |
| chr10 | 102676543 | 102676602 | 60     | 1  | 0 | 4 | 0          | 0.00247414 | 0 | 11 | 0          | 1.52371709 |
| chr10 | 102676602 | 102705186 | 28585  | 1  | 0 | 3 | 0          | 0.00170589 | 0 | 10 | 0          | 1.61091002 |
| chr10 | 102705186 | 102705245 | 60     | 1  | 1 | 3 | 0.30102999 | 0.00170589 | 0 | 10 | 0          | 1.61091002 |
| chr10 | 102705245 | 102777838 | 72594  | 5  | 0 | 3 | 0          | 0.00170589 | 0 | 10 | 0          | 1.61091002 |
| chr10 | 102777838 | 102787703 | 9866   | 2  | 0 | 3 | 0          | 7.28E-04   | 0 | 11 | 0          | 1.91540774 |
| chr10 | 102787703 | 102897441 | 109739 | 3  | 0 | 3 | 0          | 0.00170589 | 0 | 10 | 0          | 1.61091002 |
| chr10 | 102897441 | 102897500 | 60     | 1  | 1 | 4 | 0.30102999 | 0.00247414 | 0 | 11 | 0          | 1.52371709 |
| chr10 | 102897500 | 102987480 | 89981  | 1  | 1 | 4 | 0.30102999 | 0.01077081 | 0 | 9  | 0          | 1.01542894 |
| chr10 | 102987480 | 103049803 | 62324  | 1  | 1 | 4 | 0.30102999 | 0.02074938 | 0 | 8  | 0          | 0.79906872 |
| chr10 | 103049803 | 103049862 | 60     | 1  | 1 | 5 | 0.30102999 | 0.01320236 | 0 | 10 | 0          | 0.97390707 |
| chr10 | 103049862 | 103098408 | 48547  | 1  | 1 | 4 | 0.30102999 | 0.00530919 | 0 | 10 | 0          | 1.25681219 |
| chr10 | 103098408 | 103176029 | 77622  | 3  | 1 | 4 | 0.30102999 | 0.00247414 | 0 | 11 | 0          | 1.52371709 |
| chr10 | 103176029 | 103176088 | 60     | 1  | 1 | 5 | 0.30102999 | 0.00666883 | 0 | 11 | 0          | 1.20557689 |
| chr10 | 103176088 | 103208863 | 32776  | 1  | 1 | 4 | 0.30102999 | 0.00247414 | 0 | 11 | 0          | 1.52371709 |
| chr10 | 103208863 | 103275686 | 66824  | 2  | 1 | 4 | 0.30102999 | 0.00530919 | 0 | 10 | 0          | 1.25681219 |
| chr10 | 103275686 | 103366970 | 91285  | 5  | 1 | 4 | 0.30102999 | 0.01077081 | 0 | 9  | 0          | 1.01542894 |
| chr10 | 103366970 | 103419623 | 52654  | 2  | 1 | 3 | 0.30102999 | 0.00378107 | 0 | 9  | 0          | 1.33111237 |
| chr10 | 103419623 | 103449273 | 29651  | 2  | 1 | 4 | 0.30102999 | 0.01077081 | 0 | 9  | 0          | 1.01542894 |
| chr10 | 103449273 | 103534634 | 85362  | 2  | 1 | 5 | 0.30102999 | 0.01320236 | 0 | 10 | 0          | 0.97390707 |
| chr10 | 103534634 | 103602586 | 67953  | 6  | 1 | 5 | 0.1218695  | 0.00666883 | 1 | 11 | 0.1218695  | 1.20557689 |
| chr10 | 103602586 | 103693010 | 90425  | 3  | 1 | 6 | 0.1218695  | 0.01518174 | 1 | 11 | 0.1218695  | 0.9449689  |
| chr10 | 103693010 | 103693069 | 60     | 1  | 1 | 6 | 0.05404976 | 0.01518174 | 2 | 11 | 0.30102999 | 0.9449689  |
| chr10 | 103693069 | 103750391 | 57323  | 2  | 1 | 6 | 0.1218695  | 0.01518174 | 1 | 11 | 0.1218695  | 0.9449689  |
| chr10 | 103750391 | 103774446 | 24056  | 1  | 1 | 6 | 0.30102999 | 0.01518174 | 0 | 11 | 0          | 0.9449689  |
| chr10 | 103774446 | 103872818 | 98373  | 2  | 1 | 6 | 0.30102999 | 0.04875589 | 0 | 9  | 0          | 0.57322208 |
| chr10 | 103872818 | 103988947 | 116130 | 6  | 1 | 6 | 0.30102999 | 0.02793176 | 0 | 10 | 0          | 0.74627054 |
| chr10 | 103988947 | 104066826 | 77880  | 3  | 1 | 5 | 0.30102999 | 0.01320236 | 0 | 10 | 0          | 0.97390707 |
| chr10 | 104066826 | 104066885 | 60     | 1  | 1 | 6 | 0.30102999 | 0.02793176 | 0 | 10 | 0          | 0.74627054 |
| chr10 | 104066885 | 104130174 | 63290  | 2  | 1 | 5 | 0.30102999 | 0.01320236 | 0 | 10 | 0          | 0.97390707 |
| chr10 | 104130174 | 104130226 | 53     | 1  | 1 | 6 | 0.1218695  | 0.02793176 | 0 | 10 | 0.1218695  | 0.74627054 |
| chr10 | 104130226 | 104177975 | 47750  | 2  | 1 | 6 | 0.30102999 | 0.02793176 | 0 | 10 | 0          | 0.74627054 |
| chr10 | 104177975 | 104178034 | 60     | 1  | 1 | 6 | 0.30102999 | 0.01518174 | 0 | 11 | 0          | 0.9449689  |
| chr10 | 104178034 | 104222014 | 43981  | 2  | 1 | 5 | 0.30102999 | 0.00666883 | 0 | 11 | 0          | 1.20557689 |
| chr10 | 104222014 | 104222073 | 60     | 1  | 1 | 7 | 0.30102999 | 0.03037338 | 0 | 0  | 0          | 0.73110763 |
| chr10 | 104222073 | 104412294 | 190222 | 7  | 1 | 6 | 0.30102999 | 0.01518174 | 0 | 11 | 0          | 0.9449689  |
| chr10 | 104412294 | 104445690 | 33397  | 1  | 1 | 6 | 0.30102999 | 0.02793176 | 0 | 10 | 0          | 0.74627054 |
| chr10 | 104445690 | 104477485 | 31796  | 2  | 1 | 6 | 0.1218695  | 0.02793176 | 1 | 10 | 0.1218695  | 0.74627054 |
| chr10 | 104477485 | 104556998 | 79514  | 1  | 1 | 6 | 0.1218695  | 0.05732208 | 0 | 11 | 0.1218695  | 0.57322208 |
| chr10 | 104556998 | 104557057 | 60     | 1  | 2 | 6 | 0.30102999 | 0.04875589 | 1 | 9  | 0.05404976 | 0.57322208 |
| chr10 | 104557057 | 104575440 | 18384  | 1  | 2 | 5 | 0.30102999 | 0.02473314 | 1 | 9  | 0.05404976 | 0.76806864 |
| chr10 | 104575440 | 104590252 | 14813  | 1  | 2 | 5 | 0.61140001 | 0.02473314 | 0 | 9  | 0          | 0.76806864 |
| chr10 | 104590252 | 104899137 | 308886 | 11 | 2 | 5 | 0.30102999 | 0.02473314 | 1 | 9  | 0.05404976 | 0.76806864 |
| chr10 | 104899137 | 104899196 | 60     | 1  | 2 | 5 | 0.1575501  | 0.02473314 | 2 | 9  | 0.1575501  | 0.76806864 |
| chr10 | 104899196 | 104989009 | 89814  | 2  | 2 | 4 | 0.1575501  | 0.01077081 | 2 | 9  | 0.1575501  | 1.01542894 |
| chr10 | 104989009 | 105166144 | 177136 | 6  | 2 | 4 | 0.30102999 | 0.01077081 | 1 | 9  | 0.05404976 | 1.01542894 |
| chr10 | 105166144 | 105206854 | 40711  | 3  | 1 | 4 | 0.1575501  | 0.01077081 | 2 | 9  | 0.1575501  | 1.01542894 |
| chr10 | 105206854 | 105350220 | 143367 | 5  | 2 | 4 | 0.30102999 | 0.01077081 | 1 | 9  | 0.05404976 | 1.01542894 |
| chr10 | 105350220 | 105374321 | 24102  | 2  | 2 | 4 | 0.30102999 | 0.00530919 | 1 | 10 | 0.05404976 | 1.25681219 |
| chr10 | 105374321 | 105431236 | 56916  | 1  | 2 | 4 | 0.61140001 | 0.00530919 | 0 | 10 | 0          | 1.25681219 |
| chr10 | 105431236 | 105431294 | 59     | 1  | 2 | 4 | 0.61140001 | 0.00247414 | 0 | 11 | 0          | 1.52371709 |
| chr10 | 105431294 | 105727489 | 296196 | 7  | 2 | 4 | 0.61140001 | 0.00530919 | 0 | 10 | 0          | 1.25681219 |
| chr10 | 105727489 | 105727541 | 53     | 1  | 2 | 5 | 0.61140001 | 0.01320236 | 0 | 10 | 0          | 0.97390707 |
| chr10 | 105727541 | 105823642 | 96102  | 4  | 2 | 4 | 0.61140001 | 0.00530919 | 0 | 10 | 0          | 1.25681219 |
| chr10 | 105823642 | 105823701 | 60     | 1  | 0 | 5 | 0.61140001 | 0.00666883 | 0 | 11 | 0          | 1.20557689 |
| chr10 | 105823701 | 105852252 | 28552  | 1  | 2 | 4 | 0.61140001 | 0.00530919 | 0 | 10 | 0          | 1.25681219 |
| chr10 | 105852252 | 105952489 | 100238 | 4  | 2 | 3 | 0.61140001 | 0.00170589 | 0 | 10 | 0          | 1.61091002 |
| chr10 | 105952489 | 105952548 | 60     | 1  | 2 | 4 | 0.61140001 | 0.00530919 | 0 | 10 | 0          | 1.25681219 |
| chr10 | 105952548 | 106021532 | 68985  | 2  | 2 | 3 | 0.61140001 | 0.00170589 | 0 | 10 | 0          | 1.61091002 |
| chr10 | 106021532 | 106021591 | 60     | 1  | 2 | 4 | 0.61140001 | 0.00530919 | 0 | 10 | 0          | 1.25681219 |
| chr10 | 106021591 | 106153921 | 132331 | 6  | 2 | 3 | 0.61140001 | 0.00378107 | 0 | 9  | 0          | 1.33111237 |
| chr10 | 106153921 | 106411883 | 257963 | 4  | 2 | 3 | 0.30102999 | 0.00378107 | 1 | 9  | 0.05404976 | 1.33111237 |
| chr10 | 106411883 | 106411942 | 60     | 1  | 2 | 4 | 0.30102999 | 0.01077081 | 1 | 9  | 0.05404976 | 1.01542894 |
| chr10 | 106411942 | 106437463 | 25522  | 1  | 2 | 4 | 0.61140001 | 0.01077081 | 0 | 9  | 0          | 1.01542894 |
| chr10 | 106437463 | 106611508 | 174046 | 4  | 2 | 4 | 0.61140001 | 0.00530919 | 0 | 10 | 0          | 1.25681219 |
| chr10 | 106611508 | 106643119 | 31612  | 1  | 1 | 4 | 0.30102999 | 0.02074938 | 0 |    |            |            |



|       |           |           |        |   |   |            |            |            |   |            |            |            |
|-------|-----------|-----------|--------|---|---|------------|------------|------------|---|------------|------------|------------|
| chr10 | 109454771 | 109552932 | 98162  | 1 | 0 | 1          | 0          | 0.00478973 | 0 | 5          | 0          | 1.02643191 |
| chr10 | 109552932 | 109552991 | 60     | 1 | 1 | 1          | 0.30102999 | 0.00478973 | 0 | 5          | 0          | 1.02643191 |
| chr10 | 109552991 | 109670302 | 117312 | 1 | 0 | 1          | 0          | 0.01091641 | 0 | 4          | 0          | 0.76005302 |
| chr10 | 109670302 | 109670361 | 60     | 1 | 0 | 1          | 0          | 0.00204627 | 0 | 6          | 0          | 1.31360226 |
| chr10 | 109670361 | 109862404 | 192044 | 2 | 0 | 1          | 0          | 0.01091641 | 0 | 4          | 0          | 0.76005302 |
| chr10 | 109862404 | 110057187 | 194784 | 2 | 0 | 0          | 0          | 0          | 0 | 1          | 0          | 0.30102999 |
| chr10 | 110057187 | 110057246 | 60     | 1 | 0 | 1          | 0          | 0.01091641 | 0 | 4          | 0          | 0.76005302 |
| chr10 | 110057246 | 110242525 | 185280 | 2 | 0 | 0          | 0          | 0          | 0 | 1          | 0          | 0.30102999 |
| chr10 | 110242525 | 110425573 | 183049 | 2 | 0 | 0          | 0          | 0          | 0 | 2          | 0          | 0.61140001 |
| chr10 | 110425573 | 110425632 | 60     | 1 | 1 | 2          | 0.30102999 | 0.0429175  | 0 | 4          | 0          | 0.47744371 |
| chr10 | 110425632 | 110611992 | 186361 | 2 | 1 | 0          | 0.30102999 | 0          | 0 | 2          | 0          | 0.61140001 |
| chr10 | 110611992 | 110729064 | 117073 | 1 | 0 | 0          | 0          | 0          | 0 | 2          | 0          | 0.61140001 |
| chr10 | 110729064 | 110966288 | 237225 | 2 | 0 | 1          | 0          | 0.01091641 | 0 | 4          | 0          | 0.76005302 |
| chr10 | 110966288 | 111037990 | 71703  | 2 | 1 | 1          | 0.30102999 | 0.00478973 | 0 | 5          | 0          | 1.02643191 |
| chr10 | 111037990 | 111038049 | 60     | 1 | 3 | 0.30102999 | 0.01598258 | 0          | 0 | 7          | 0          | 0.84395715 |
| chr10 | 111038049 | 111232394 | 194346 | 1 | 2 | 0.30102999 | 0.02162467 | 0          | 0 | 5          | 0          | 0.68214471 |
| chr10 | 111232394 | 111304044 | 71851  | 1 | 0 | 2          | 0          | 0.02162467 | 0 | 5          | 0          | 0.68214471 |
| chr10 | 111304044 | 111544670 | 240627 | 3 | 0 | 0          | 0          | 0.00493743 | 1 | 7          | 0.30102999 | 1.16581773 |
| chr10 | 111544670 | 111544729 | 60     | 1 | 0 | 2          | 0          | 0.00530919 | 0 | 10         | 0.30102999 | 1.2568129  |
| chr10 | 111544729 | 111628432 | 83704  | 1 | 0 | 3          | 0          | 0.00170588 | 0 | 10         | 0.30102999 | 1.61091002 |
| chr10 | 111628432 | 111639962 | 11531  | 1 | 0 | 3          | 0          | 0.0079614  | 1 | 8          | 0.30102999 | 1.07548421 |
| chr10 | 111639962 | 111640021 | 60     | 1 | 0 | 2          | 0          | 0.0079614  | 1 | 8          | 0.1218695  | 1.07548421 |
| chr10 | 111640021 | 111731310 | 91290  | 3 | 0 | 2          | 0          | 0.00221948 | 1 | 8          | 0.30102999 | 1.44210395 |
| chr10 | 111731310 | 111731369 | 60     | 1 | 2 | 2          | 0.30102999 | 9.54E-04   | 1 | 9          | 0.05404976 | 1.74076927 |
| chr10 | 111731369 | 111815687 | 84319  | 2 | 2 | 2          | 0.30102999 | 0.00221948 | 1 | 8          | 0.05404976 | 1.44210395 |
| chr10 | 111815687 | 111815746 | 60     | 1 | 2 | 3          | 0.30102999 | 0.0079614  | 1 | 8          | 0.05404976 | 1.07548421 |
| chr10 | 111815746 | 111872613 | 56688  | 2 | 2 | 2          | 0.30102999 | 0.00221948 | 1 | 8          | 0.05404976 | 1.44210395 |
| chr10 | 111872613 | 111973270 | 100658 | 1 | 2 | 2          | 0.1218695  | 0.00221948 | 1 | 8          | 0.1218695  | 1.44210395 |
| chr10 | 111973270 | 112012899 | 39630  | 2 | 0 | 3          | 0.1218695  | 0.00170588 | 1 | 10         | 0.1218695  | 1.61091002 |
| chr10 | 112012899 | 112342409 | 329511 | 7 | 1 | 3          | 0.1218695  | 0.00378107 | 1 | 9          | 0.1218695  | 1.33111237 |
| chr10 | 112342409 | 112405234 | 62826  | 1 | 1 | 3          | 0.1218695  | 0.0079614  | 1 | 8          | 0.1218695  | 1.07548421 |
| chr10 | 112405234 | 112438134 | 32901  | 2 | 2 | 3          | 0.30102999 | 0.0079614  | 1 | 8          | 0.05404976 | 1.07548421 |
| chr10 | 112438134 | 112537387 | 99254  | 3 | 2 | 3          | 0.30102999 | 0.00378107 | 0 | 9          | 0.05404976 | 1.33111237 |
| chr10 | 112537387 | 112635757 | 98371  | 2 | 1 | 3          | 0.1218695  | 0.0079614  | 1 | 8          | 0.1218695  | 1.07548421 |
| chr10 | 112635757 | 112635816 | 60     | 1 | 2 | 3          | 0.30102999 | 0.0079614  | 1 | 8          | 0.05404976 | 1.07548421 |
| chr10 | 112635816 | 112685048 | 49233  | 3 | 1 | 2          | 0.1218695  | 0.00221948 | 1 | 8          | 0.1218695  | 1.44210395 |
| chr10 | 112685048 | 112724426 | 39379  | 1 | 0 | 2          | 0          | 0.00493743 | 1 | 7          | 0.30102999 | 1.16581773 |
| chr10 | 112724426 | 112724485 | 60     | 1 | 0 | 2          | 0          | 0.00221948 | 1 | 8          | 0.30102999 | 1.44210395 |
| chr10 | 112724485 | 112753257 | 28773  | 1 | 0 | 2          | 0          | 0.00493743 | 1 | 7          | 0.30102999 | 1.16581773 |
| chr10 | 112753257 | 112753316 | 60     | 1 | 1 | 3          | 0.1218695  | 0.01598258 | 1 | 7          | 0.1218695  | 0.84395715 |
| chr10 | 112753316 | 112839536 | 86221  | 2 | 0 | 2          | 0          | 0.00493743 | 1 | 7          | 0.30102999 | 1.16581773 |
| chr10 | 112839536 | 112839586 | 51     | 1 | 2 | 2          | 0.1218695  | 0.00221948 | 1 | 8          | 0.1218695  | 1.44210395 |
| chr10 | 112839586 | 112915164 | 75579  | 1 | 2 | 2          | 0.1218695  | 0.01053319 | 1 | 6          | 0.1218695  | 0.91219088 |
| chr10 | 112915164 | 113072857 | 157694 | 1 | 1 | 5          | 0.1218695  | 0.00478973 | 1 | 5          | 0.1218695  | 1.02643191 |
| chr10 | 113072857 | 113072916 | 60     | 1 | 1 | 1          | 0.1218695  | 8.47E-04   | 1 | 7          | 0.1218695  | 1.62048027 |
| chr10 | 113072916 | 113217415 | 144500 | 1 | 1 | 1          | 0.1218695  | 0.01091641 | 1 | 4          | 0.1218695  | 0.76005302 |
| chr10 | 113217415 | 113377242 | 159828 | 1 | 1 | 1          | 0.1218695  | 0.05404976 | 1 | 2          | 0.1218695  | 0.30102999 |
| chr10 | 113377242 | 113377301 | 60     | 1 | 2 | 1          | 0.30102999 | 0.05404976 | 1 | 2          | 0.05404976 | 0.30102999 |
| chr10 | 113377301 | 113702235 | 324935 | 1 | 1 | 1          | 0.30102999 | 0.05404976 | 1 | 0          | 0          | 0.30102999 |
| chr10 | 113702235 | 113702294 | 60     | 1 | 2 | 2          | 0.30102999 | 0.02162467 | 0 | 5          | 0          | 0.68214471 |
| chr10 | 113702294 | 113872224 | 169931 | 1 | 1 | 1          | 0.30102999 | 0.02438896 | 0 | 3          | 0          | 0.51676182 |
| chr10 | 113872224 | 113911315 | 39092  | 2 | 1 | 1          | 0.30102999 | 0.00478973 | 0 | 5          | 0          | 1.02643191 |
| chr10 | 113911315 | 113931990 | 20676  | 2 | 1 | 1          | 0.30102999 | 0.00204627 | 0 | 6          | 0          | 1.31360226 |
| chr10 | 113931990 | 114005776 | 73787  | 2 | 1 | 2          | 0.30102999 | 0.01053319 | 0 | 6          | 0          | 0.91219088 |
| chr10 | 114005776 | 114118051 | 112276 | 2 | 1 | 1          | 0.30102999 | 0.00204627 | 0 | 6          | 0          | 1.31360226 |
| chr10 | 114118051 | 114190333 | 72283  | 4 | 1 | 2          | 0.30102999 | 0.00493743 | 0 | 7          | 0          | 1.16581773 |
| chr10 | 114190333 | 114278859 | 88527  | 2 | 1 | 1          | 0.30102999 | 8.47E-04   | 0 | 7          | 0          | 1.62048027 |
| chr10 | 114278859 | 114339686 | 60828  | 1 | 1 | 1          | 0.30102999 | 0.00204627 | 0 | 6          | 0          | 1.31360226 |
| chr10 | 114339686 | 114428032 | 88347  | 3 | 2 | 2          | 0.51676182 | 0.01053319 | 1 | 6          | 0.02438896 | 0.91219088 |
| chr10 | 114428032 | 114497495 | 69464  | 1 | 2 | 2          | 0.30102999 | 0.01053319 | 1 | 6          | 0.05404976 | 0.91219088 |
| chr10 | 114497495 | 114534908 | 37414  | 2 | 2 | 3          | 0.30102999 | 0.03070643 | 1 | 6          | 0.05404976 | 0.63695542 |
| chr10 | 114534908 | 114534967 | 60     | 1 | 3 | 3          | 0.51676182 | 0.03070643 | 1 | 6          | 0.02438896 | 0.63695542 |
| chr10 | 114534967 | 114595633 | 60667  | 1 | 3 | 2          | 0.51676182 | 0.01053319 | 1 | 6          | 0.02438896 | 0.91219088 |
| chr10 | 114595633 | 114595692 | 8036   | 1 | 3 | 2          | 0.51676182 | 0.00493743 | 7 | 0.02438896 | 1.16581773 |            |
| chr10 | 114595692 | 114676227 | 80536  | 1 | 3 | 2          | 0.51676182 | 0.01053319 | 1 | 6          | 0.02438896 | 0.91219088 |
| chr10 | 114676227 | 114676286 | 60     | 1 | 3 | 60         | 0.51676182 | 0.03070643 | 1 | 6          | 0.02438896 | 0.63695542 |
| chr10 | 114676286 | 114831514 | 155229 | 3 | 3 | 2          | 0.51676182 | 0.02162467 | 5 | 0.02438896 | 0.68214471 |            |
| chr10 | 114831514 | 115204957 | 373444 | 3 | 3 | 3          | 0.51676182 | 0.03070643 | 1 | 6          | 0.02438896 | 0.63695542 |
| chr10 | 115204957 | 115205016 | 60     | 1 | 3 | 6          | 0.51676182 | 0.06713722 | 1 | 6          | 0.02438896 | 0.44141547 |
| chr10 | 115205016 | 115349003 | 143988 | 3 | 3 | 4          | 0.51676182 | 0.11390336 | 1 | 5          | 0.02438896 | 0.30102999 |
| chr10 | 115349003 | 115454781 | 105779 | 4 | 3 | 4          | 0.51676182 | 0.06713722 | 1 | 6          | 0.02438896 | 0.44141547 |
| chr10 | 115454781 | 115542162 | 87382  | 4 | 3 | 3          | 0.51676182 | 0.05670724 | 1 | 5          | 0.02438896 | 0.45545077 |
| chr10 | 115542162 | 115640259 | 98098  | 2 | 3 | 3          | 0.51676182 | 0.10122019 | 1 | 4          | 0.02438896 | 0.30102999 |
| chr10 | 115640259 | 115676805 | 36547  | 2 | 3 | 3          | 0.51676182 | 0.05670724 | 1 | 5          | 0.02438896 | 0.45545077 |
| chr10 | 115676805 | 115687170 | 10366  | 2 | 4 | 4          | 0.51676182 | 0.06713722 | 1 | 6          | 0.02438896 | 0.44141547 |
| chr10 | 115687170 | 115736962 | 49793  | 1 | 3 | 4          | 0.51676182 | 0.11390336 | 1 | 5          | 0.02438896 | 0.30102999 |
| chr10 | 115736962 | 115827937 | 90976  | 1 | 3 | 4          | 0.51676182 | 0.30102999 | 1 | 3          | 0.02438896 | 0.10122019 |
| chr10 | 115827937 | 115827996 | 60     | 1 | 3 | 4          | 0.51676182 | 0.18734596 | 1 | 4          | 0.02438896 | 0.18734596 |
| chr10 | 115827996 | 115921404 | 93409  | 2 | 3 | 3          | 0.51676182 | 0.10122019 | 4 | 0.02438896 | 0.30102999 | 0.30102999 |
| chr10 | 115921404 | 116025608 | 104205 | 4 | 3 | 4          | 0.51676182 | 0.11390336 | 1 | 5          | 0.02438896 | 0.30102999 |
| chr10 | 116025608 | 116056380 | 30773  | 4 | 3 | 4          | 0.51676182 | 0.18734596 | 1 | 4          | 0.02438896 | 0.18734596 |
| chr10 | 116056380 | 116092980 | 36601  | 2 | 3 | 4          | 0.51676182 | 0.11390336 | 1 | 5          | 0.02438896 | 0.30102999 |
| chr10 | 116092980 | 116152540 | 59561  | 3 | 3 | 4          | 0.51676182 | 0.06713722 | 1 | 6          | 0.02438896 | 0.44141547 |
| chr10 | 116152540 | 116293190 | 140651 | 3 | 2 | 4          | 0.30102999 | 0.11390336 | 1 | 5          | 0.05404976 | 0.30102999 |
| chr10 | 116293190 | 116293249 | 60     | 1 | 2 | 4          | 0.30102999 | 0.06713722 | 1 | 6          | 0.05404976 | 0.44141547 |
| chr10 | 116293249 | 116405945 | 112697 | 2 | 2 | 4          | 0.30102999 | 0.18734596 | 1 | 4          | 0.05404976 | 0.18734596 |
| chr10 | 116405945 | 116406004 | 60     | 1 | 2 | 4          | 0.30102999 | 0.06713722 | 1 | 6          | 0.05404976 | 0.44141547 |
| chr10 | 116406004 | 116477971 | 71968  | 1 | 2 | 3          | 0.30102999 | 0.10122019 | 1 | 4          | 0.05404976 | 0.30102999 |
| chr10 | 116477971 | 116478030 | 60     | 1 | 3 | 3          | 0.51676182 | 0.10122019 | 1 | 4          | 0.02438896 | 0.30102999 |
| chr10 | 116478030 | 116705895 | 227866 | 5 | 2 | 3          | 0.30102999 | 0.10122019 | 1 | 4          | 0.05404976 | 0.30102999 |
| chr10 | 116705895 | 116786582 | 80688  | 2 | 2 | 3          | 0.30102999 | 0.05670724 | 1 | 5          | 0.05404976 | 0.45545077 |
| chr10 | 116786582 | 116786641 | 60     | 1 | 2 | 4          | 0.30102999 |            |   |            |            |            |

|       |           |           |        |   |   |   |            |            |   |    |            |            |
|-------|-----------|-----------|--------|---|---|---|------------|------------|---|----|------------|------------|
| chr10 | 119100470 | 119122473 | 22004  | 2 | 1 | 2 | 0.30102999 | 0.00221948 | 0 | 8  | 0          | 1.44210395 |
| chr10 | 119122473 | 119168883 | 46411  | 1 | 1 | 2 | 0.30102999 | 0.00493743 | 0 | 7  | 0          | 1.16581773 |
| chr10 | 119168883 | 119168942 | 60     | 1 | 1 | 2 | 0.30102999 | 0.00221948 | 0 | 8  | 0          | 1.44210395 |
| chr10 | 119168942 | 119327170 | 158229 | 4 | 1 | 1 | 0.30102999 | 0.00204627 | 0 | 6  | 0          | 1.31360226 |
| chr10 | 119327170 | 119434802 | 107633 | 1 | 1 | 1 | 0.30102999 | 0.00478973 | 0 | 5  | 0          | 1.02643191 |
| chr10 | 119434802 | 119434861 | 60     | 1 | 1 | 2 | 0.30102999 | 0.02162467 | 0 | 5  | 0          | 0.68214471 |
| chr10 | 119434861 | 119561238 | 126378 | 1 | 1 | 1 | 0.30102999 | 0.01091641 | 0 | 4  | 0          | 0.76005302 |
| chr10 | 119561238 | 119685626 | 124389 | 1 | 1 | 1 | 0.30102999 | 0.02438896 | 0 | 3  | 0          | 0.51676182 |
| chr10 | 119685626 | 119780990 | 95365  | 2 | 2 | 1 | 0.61140001 | 0.01091641 | 0 | 4  | 0          | 0.76005302 |
| chr10 | 119780990 | 119805443 | 24454  | 2 | 2 | 2 | 0.61140001 | 0.02162467 | 0 | 5  | 0          | 0.68214471 |
| chr10 | 119805443 | 119813612 | 8170   | 1 | 1 | 2 | 0.30102999 | 0.02162467 | 0 | 5  | 0          | 0.68214471 |
| chr10 | 119813612 | 119925455 | 111844 | 3 | 1 | 1 | 0.30102999 | 0.00478973 | 0 | 5  | 0          | 1.02643191 |
| chr10 | 119925455 | 120054686 | 129232 | 3 | 1 | 2 | 0.30102999 | 0.02162467 | 0 | 5  | 0          | 0.68214471 |
| chr10 | 120054686 | 120306894 | 252209 | 4 | 3 | 2 | 0.93173516 | 0.02162467 | 0 | 5  | 0          | 0.68214471 |
| chr10 | 120306894 | 120508795 | 201902 | 6 | 3 | 2 | 0.93173516 | 0.05670724 | 0 | 5  | 0          | 0.45545077 |
| chr10 | 120508795 | 120562393 | 53599  | 1 | 3 | 2 | 0.93173516 | 0.02162467 | 0 | 5  | 0          | 0.68214471 |
| chr10 | 120562393 | 120678170 | 115778 | 1 | 1 | 2 | 0.30102999 | 0.02162467 | 0 | 5  | 0          | 0.68214471 |
| chr10 | 120678170 | 120728496 | 50327  | 2 | 1 | 4 | 0.30102999 | 0.06713722 | 0 | 6  | 0          | 0.44141547 |
| chr10 | 120728496 | 120807022 | 78527  | 2 | 1 | 4 | 0.30102999 | 0.02074938 | 0 | 8  | 0          | 0.79906872 |
| chr10 | 120807022 | 120807081 | 60     | 1 | 2 | 4 | 0.61140001 | 0.02074938 | 0 | 8  | 0          | 0.79906872 |
| chr10 | 120807081 | 120850434 | 43354  | 2 | 1 | 4 | 0.30102999 | 0.02074938 | 0 | 8  | 0          | 0.79906872 |
| chr10 | 120850434 | 120970915 | 120482 | 2 | 1 | 3 | 0.30102999 | 0.0079614  | 0 | 8  | 0          | 1.07548421 |
| chr10 | 120970915 | 120970974 | 60     | 1 | 1 | 4 | 0.30102999 | 0.02074938 | 0 | 8  | 0          | 0.79906872 |
| chr10 | 120970974 | 121290609 | 319636 | 7 | 1 | 4 | 0.30102999 | 0.03812622 | 0 | 7  | 0          | 0.60763643 |
| chr10 | 121290609 | 121430894 | 140286 | 5 | 1 | 4 | 0.30102999 | 0.02074938 | 0 | 8  | 0          | 0.79906872 |
| chr10 | 121430894 | 121450103 | 19210  | 2 | 1 | 5 | 0.30102999 | 0.04407651 | 0 | 8  | 0          | 0.58747015 |
| chr10 | 121450103 | 121458431 | 8329   | 2 | 1 | 5 | 0.30102999 | 0.02473314 | 0 | 9  | 0          | 0.76806864 |
| chr10 | 121458431 | 121551651 | 93221  | 2 | 1 | 4 | 0.30102999 | 0.01077081 | 0 | 9  | 0          | 1.01542894 |
| chr10 | 121551651 | 121607181 | 55531  | 3 | 1 | 3 | 0.30102999 | 0.0079614  | 0 | 8  | 0          | 1.07548421 |
| chr10 | 121607181 | 121630730 | 23550  | 2 | 1 | 4 | 0.30102999 | 0.01077081 | 0 | 9  | 0          | 1.01542894 |
| chr10 | 121630730 | 121692456 | 61727  | 2 | 1 | 4 | 0.30102999 | 0.02074938 | 0 | 8  | 0          | 0.79906872 |
| chr10 | 121692456 | 121720948 | 28493  | 3 | 1 | 5 | 0.30102999 | 0.04407651 | 0 | 8  | 0          | 0.58747015 |
| chr10 | 121720948 | 121775059 | 54112  | 1 | 1 | 4 | 0.30102999 | 0.02074938 | 0 | 8  | 0          | 0.79906872 |
| chr10 | 121775059 | 121862696 | 87638  | 1 | 1 | 4 | 0.30102999 | 0.01598258 | 0 | 7  | 0          | 0.84395715 |
| chr10 | 121862696 | 122239298 | 376603 | 3 | 1 | 3 | 0.30102999 | 0.03070643 | 0 | 6  | 0          | 0.63695542 |
| chr10 | 122239298 | 122328262 | 88965  | 2 | 1 | 3 | 0.30102999 | 0.05670724 | 0 | 5  | 0          | 0.45545077 |
| chr10 | 122328262 | 122369351 | 41090  | 2 | 1 | 3 | 0.30102999 | 0.03070643 | 0 | 6  | 0          | 0.63695542 |
| chr10 | 122369351 | 122543185 | 173835 | 2 | 1 | 2 | 0.30102999 | 0.01053319 | 0 | 6  | 0          | 0.91219088 |
| chr10 | 122543185 | 122603290 | 60106  | 2 | 1 | 2 | 0.30102999 | 0.00493743 | 0 | 7  | 0          | 1.16581773 |
| chr10 | 122603290 | 122668785 | 65496  | 3 | 1 | 2 | 0.30102999 | 0.00221948 | 0 | 8  | 0          | 1.44210395 |
| chr10 | 122668785 | 122761687 | 92903  | 1 | 1 | 2 | 0.30102999 | 0.01053319 | 0 | 6  | 0          | 0.91219088 |
| chr10 | 122761687 | 122817760 | 56074  | 1 | 1 | 2 | 0.30102999 | 0.04029175 | 0 | 4  | 0          | 0.47744371 |
| chr10 | 122817760 | 122828243 | 10484  | 2 | 1 | 2 | 0.30102999 | 0.02162467 | 0 | 5  | 0          | 0.68214471 |
| chr10 | 122828243 | 122934825 | 106583 | 2 | 1 | 2 | 0.30102999 | 0.0429175  | 0 | 4  | 0          | 0.47744371 |
| chr10 | 122934825 | 122934884 | 60     | 1 | 1 | 2 | 0.30102999 | 0.02162467 | 0 | 5  | 0          | 0.68214471 |
| chr10 | 122934884 | 123025474 | 90591  | 1 | 1 | 1 | 0.30102999 | 0.00478973 | 0 | 5  | 0          | 1.02643191 |
| chr10 | 123025474 | 123116447 | 90974  | 2 | 1 | 1 | 0.30102999 | 0.00204627 | 0 | 6  | 0          | 1.31360226 |
| chr10 | 123116447 | 123208806 | 92360  | 2 | 1 | 1 | 0.30102999 | 0.03070643 | 1 | 6  | 0.1218695  | 0.63695542 |
| chr10 | 123208806 | 123208865 | 60     | 1 | 2 | 3 | 0.1575501  | 0.0079614  | 2 | 8  | 0.1575501  | 1.07548421 |
| chr10 | 123208865 | 123274734 | 65870  | 2 | 1 | 3 | 0.1575501  | 0.03070643 | 2 | 6  | 0.1575501  | 0.63695542 |
| chr10 | 123274734 | 123353262 | 78529  | 4 | 2 | 3 | 0.1575501  | 0.01598258 | 2 | 7  | 0.1575501  | 0.84395715 |
| chr10 | 123353262 | 123468418 | 115157 | 1 | 1 | 3 | 0.1218695  | 0.01598258 | 1 | 7  | 0.1218695  | 0.84395715 |
| chr10 | 123468418 | 123600369 | 132222 | 4 | 1 | 3 | 0.1218695  | 0.0079614  | 1 | 8  | 0.1218695  | 1.07548421 |
| chr10 | 123600369 | 123733571 | 132933 | 5 | 1 | 3 | 0.1218695  | 0.01598258 | 1 | 7  | 0.1218695  | 0.84395715 |
| chr10 | 123733571 | 123792851 | 59281  | 1 | 1 | 3 | 0.1218695  | 0.03070643 | 1 | 6  | 0.1218695  | 0.63695542 |
| chr10 | 123792851 | 123792910 | 60     | 1 | 2 | 3 | 0.30102999 | 0.0079614  | 1 | 8  | 0.05404976 | 1.07548421 |
| chr10 | 123792910 | 123853343 | 60434  | 1 | 1 | 3 | 0.1218695  | 0.0079614  | 1 | 8  | 0.1218695  | 1.07548421 |
| chr10 | 123853343 | 123887322 | 33980  | 2 | 1 | 3 | 0.1218695  | 0.00378107 | 1 | 9  | 0.1218695  | 1.33112337 |
| chr10 | 123887322 | 124083158 | 195837 | 6 | 2 | 3 | 0.30102999 | 0.00378107 | 1 | 9  | 0.05404976 | 1.33112337 |
| chr10 | 124083158 | 124162637 | 79480  | 2 | 1 | 3 | 0.30102999 | 0.0079614  | 1 | 8  | 0.05404976 | 1.07548421 |
| chr10 | 124162637 | 124189949 | 27313  | 4 | 2 | 3 | 0.30102999 | 0.00378107 | 1 | 9  | 0.05404976 | 1.33112337 |
| chr10 | 124189949 | 124500982 | 311034 | 5 | 2 | 3 | 0.30102999 | 0.0079614  | 1 | 8  | 0.05404976 | 1.07548421 |
| chr10 | 124500982 | 124597326 | 96345  | 3 | 2 | 3 | 0.30102999 | 0.00378107 | 1 | 9  | 0.05404976 | 1.33112337 |
| chr10 | 124597326 | 124622346 | 25021  | 2 | 1 | 3 | 0.30102999 | 0.0079614  | 1 | 8  | 0.05404976 | 1.07548421 |
| chr10 | 124622346 | 124701182 | 78837  | 2 | 1 | 3 | 0.30102999 | 0.01598258 | 1 | 7  | 0.05404976 | 0.84395715 |
| chr10 | 124701182 | 124701241 | 60     | 1 | 2 | 4 | 0.30102999 | 0.01077081 | 1 | 9  | 0.05404976 | 1.01542894 |
| chr10 | 124701241 | 124917445 | 216205 | 5 | 2 | 4 | 0.30102999 | 0.03812622 | 1 | 7  | 0.05404976 | 0.60763643 |
| chr10 | 124917445 | 124917504 | 60     | 1 | 2 | 4 | 0.30102999 | 0.01077081 | 1 | 9  | 0.05404976 | 1.01542894 |
| chr10 | 124917504 | 125032104 | 114961 | 3 | 2 | 4 | 0.30102999 | 0.02074938 | 1 | 8  | 0.05404976 | 0.79906872 |
| chr10 | 125032104 | 125121097 | 88949  | 2 | 1 | 4 | 0.30102999 | 0.00530919 | 1 | 10 | 0.05404976 | 1.2568129  |
| chr10 | 125121097 | 125191734 | 70638  | 1 | 1 | 4 | 0.1218695  | 0.02074938 | 1 | 8  | 0.1218695  | 0.79906872 |
| chr10 | 125191734 | 125249962 | 58229  | 1 | 1 | 4 | 0.1218695  | 0.03812622 | 1 | 7  | 0.1218695  | 0.60763643 |
| chr10 | 125249962 | 125250021 | 60     | 1 | 2 | 4 | 0.30102999 | 0.03812622 | 1 | 7  | 0.05404976 | 0.60763643 |
| chr10 | 125250021 | 125429413 | 179939 | 1 | 2 | 3 | 0.30102999 | 0.01598258 | 1 | 7  | 0.05404976 | 0.84395715 |
| chr10 | 125429413 | 125436776 | 7364   | 1 | 2 | 2 | 0.30102999 | 0.00493743 | 1 | 7  | 0.05404976 | 1.16581773 |
| chr10 | 125436776 | 125508873 | 72098  | 3 | 2 | 3 | 0.30102999 | 0.01598258 | 1 | 7  | 0.05404976 | 0.84395715 |
| chr10 | 125508873 | 125573294 | 64422  | 2 | 3 | 3 | 0.51676182 | 0.0079614  | 1 | 8  | 0.02438896 | 1.07548421 |
| chr10 | 125573294 | 125573353 | 60     | 1 | 3 | 3 | 0.51676182 | 0.00378107 | 1 | 9  | 0.02438896 | 1.33112337 |
| chr10 | 125573353 | 125726005 | 152653 | 3 | 3 | 3 | 0.51676182 | 0.01598258 | 1 | 7  | 0.02438896 | 0.84395715 |
| chr10 | 125726005 | 125834018 | 108014 | 2 | 3 | 2 | 0.51676182 | 0.00493743 | 1 | 7  | 0.02438896 | 1.16581773 |
| chr10 | 125834018 | 126061025 | 227008 | 3 | 3 | 2 | 0.51676182 | 0.01053319 | 1 | 6  | 0.02438896 | 0.91219088 |
| chr10 | 126061025 | 126105695 | 44671  | 3 | 3 | 2 | 0.51676182 | 0.00221948 | 1 | 6  | 0.02438896 | 1.44210395 |
| chr10 | 126105695 | 126173860 | 68166  | 3 | 2 | 2 | 0.51676182 | 0.01053319 | 1 | 6  | 0.02438896 | 0.91219088 |
| chr10 | 126173860 | 126434032 | 260173 | 6 | 2 | 2 | 0.30102999 | 0.01053319 | 1 | 6  | 0.05404976 | 0.91219088 |
| chr10 | 126434032 | 126491087 | 57056  | 2 | 2 | 2 | 0.51676182 | 0.01053319 | 1 | 6  | 0.02438896 | 0.91219088 |
| chr10 | 126491087 | 126517320 | 26234  | 1 | 2 | 2 | 0.30102999 | 0.01053319 | 1 | 6  | 0.05404976 | 0.91219088 |
| chr10 | 126517320 | 126581894 | 64575  | 2 | 2 | 3 | 0.30102999 | 0.03070643 | 1 | 6  | 0.05404976 | 0.63695542 |
| chr10 | 126581894 | 126581953 | 60     | 1 | 3 | 3 | 0.51676182 | 0.0079614  | 1 | 8  | 0.02438896 | 1.07548421 |
| chr10 | 126581953 | 126631873 | 49921  | 1 | 2 | 3 | 0.30102999 | 0.0079614  | 1 | 8  | 0.05404976 | 1.07548421 |
| chr10 | 126631873 | 126716425 | 84553  | 2 | 2 | 3 | 0.30102999 | 0.01598258 | 1 | 7  | 0.05404976 | 0.84395715 |
| chr10 | 126716425 | 126809975 | 93551  | 2 | 3 | 3 | 0.1218695  | 0.01598258 | 1 | 7  | 0.1218695  | 0.84       |

|       |           |           |        |   |   |     |            |            |   |    |            |            |
|-------|-----------|-----------|--------|---|---|-----|------------|------------|---|----|------------|------------|
| chr10 | 129874917 | 129874976 | 60     | 1 | 2 | 4   | 0.6114001  | 5.97E-05   | 0 | 15 | 0          | 2.87247834 |
| chr10 | 129874976 | 129908735 | 33760  | 1 | 1 | 4   | 0.30102999 | 0.00247414 | 0 | 11 | 0          | 1.52371709 |
| chr10 | 129908735 | 129994593 | 85859  | 1 | 1 | 4   | 0.30102999 | 0.00530919 | 0 | 10 | 0          | 1.25681219 |
| chr10 | 129994593 | 130031754 | 37162  | 2 | 1 | 4   | 0.30102999 | 0.00247414 | 0 | 11 | 0          | 1.52371709 |
| chr10 | 130031754 | 130187866 | 156113 | 1 | 0 | 3   | 0          | 7.28E-04   | 0 | 11 | 0          | 1.91540774 |
| chr10 | 130187866 | 130187925 | 60     | 1 | 0 | 5   | 0          | 0.00317045 | 0 | 12 | 0          | 1.46403142 |
| chr10 | 130187925 | 130315999 | 128075 | 1 | 0 | 4   | 0          | 0.00108487 | 0 | 12 | 0          | 1.81706455 |
| chr10 | 130315999 | 130316058 | 60     | 1 | 0 | 4   | 0          | 4.45E-04   | 0 | 13 | 0          | 2.13824703 |
| chr10 | 130316058 | 130513537 | 197480 | 1 | 0 | 4   | 0          | 0.00108487 | 0 | 12 | 0          | 1.81706455 |
| chr10 | 130513537 | 130650432 | 136896 | 3 | 0 | 4   | 0          | 4.45E-04   | 0 | 13 | 0          | 2.13824703 |
| chr10 | 130650432 | 130723155 | 72724  | 2 | 1 | 4   | 0.30102999 | 1.70E-04   | 0 | 14 | 0          | 2.48919369 |
| chr10 | 130723155 | 130723214 | 60     | 1 | 1 | 5   | 0.30102999 | 5.83E-04   | 0 | 14 | 0          | 2.06733314 |
| chr10 | 130723214 | 130811742 | 88529  | 1 | 1 | 4   | 0.30102999 | 1.70E-04   | 0 | 14 | 0          | 2.48919369 |
| chr10 | 130811742 | 130862975 | 51234  | 2 | 1 | 5   | 0.30102999 | 5.83E-04   | 0 | 14 | 0          | 2.06733314 |
| chr10 | 130862975 | 130977858 | 114884 | 1 | 1 | 4   | 0.30102999 | 0.00108487 | 0 | 12 | 0          | 1.81706455 |
| chr10 | 130977858 | 130977917 | 60     | 1 | 1 | 5   | 0.1218695  | 0.00141024 | 1 | 13 | 0.1218695  | 1.7506523  |
| chr10 | 130977917 | 131122317 | 144401 | 2 | 1 | 3   | 0.1218695  | 0.00378107 | 1 | 9  | 0.1218695  | 1.33111237 |
| chr10 | 131122317 | 131122376 | 60     | 1 | 2 | 4   | 0.30102999 | 0.01077081 | 1 | 9  | 0.05404976 | 1.01542894 |
| chr10 | 131122376 | 131197648 | 75273  | 1 | 1 | 4   | 0.1218695  | 0.01077081 | 1 | 9  | 0.1218695  | 1.01542894 |
| chr10 | 131197648 | 131397707 | 60     | 1 | 1 | 4   | 0.1218695  | 0.00247414 | 1 | 11 | 0.1218695  | 1.52371709 |
| chr10 | 131397707 | 131335418 | 137712 | 3 | 1 | 4   | 0.1218695  | 0.00530919 | 1 | 10 | 0.1218695  | 1.25681219 |
| chr10 | 131335418 | 131335477 | 60     | 1 | 3 | 5   | 0.1218695  | 0.00666883 | 1 | 11 | 0.1218695  | 1.20557689 |
| chr10 | 131335477 | 131434194 | 98718  | 3 | 1 | 3   | 0.1218695  | 0.00170589 | 1 | 10 | 0.1218695  | 1.61091002 |
| chr10 | 131434194 | 131561314 | 127112 | 3 | 1 | 4   | 0.1218695  | 0.00108487 | 1 | 12 | 0.1218695  | 1.81706455 |
| chr10 | 131561314 | 131643607 | 82294  | 3 | 2 | 5   | 0.30102999 | 0.00141024 | 1 | 13 | 0.05404976 | 1.7506523  |
| chr10 | 131643607 | 131868882 | 225276 | 4 | 2 | 4   | 0.30102999 | 4.45E-04   | 1 | 13 | 0.05404976 | 2.13824703 |
| chr10 | 131868882 | 131938654 | 69773  | 3 | 2 | 6   | 0.30102999 | 0.00375232 | 1 | 13 | 0.05404976 | 1.42397267 |
| chr10 | 131938654 | 132019546 | 80893  | 3 | 2 | 5   | 0.30102999 | 0.00141024 | 1 | 13 | 0.05404976 | 1.7506523  |
| chr10 | 132019546 | 132082758 | 63213  | 2 | 2 | 6   | 0.30102999 | 0.00375232 | 1 | 13 | 0.05404976 | 1.42397267 |
| chr10 | 132082758 | 132082817 | 60     | 1 | 2 | 6   | 0.30102999 | 0.00166733 | 1 | 14 | 0.05404976 | 1.70763027 |
| chr10 | 132082817 | 132190695 | 107879 | 2 | 2 | 4   | 0.6114001  | 1.70E-04   | 0 | 14 | 0          | 2.48919369 |
| chr10 | 132190695 | 132263824 | 73130  | 2 | 2 | 5   | 0.6114001  | 5.83E-04   | 0 | 14 | 0          | 2.06733314 |
| chr10 | 132263824 | 132365460 | 101637 | 1 | 2 | 5   | 0.6114001  | 0.00666883 | 0 | 11 | 0          | 1.20557689 |
| chr10 | 132365460 | 132418039 | 52580  | 1 | 2 | 5   | 0.6114001  | 0.02473314 | 0 | 9  | 0          | 0.76806864 |
| chr10 | 132418039 | 132468363 | 50325  | 2 | 2 | 5   | 0.6114001  | 0.01320236 | 0 | 10 | 0          | 0.97390707 |
| chr10 | 132468363 | 132580655 | 112293 | 2 | 2 | 5   | 0.6114001  | 0.00666883 | 0 | 11 | 0          | 1.20557689 |
| chr10 | 132580655 | 132680277 | 99623  | 1 | 2 | 4   | 0.6114001  | 0.01077081 | 0 | 9  | 0          | 1.01542894 |
| chr10 | 132680277 | 132789730 | 109454 | 2 | 2 | 4   | 0.6114001  | 0.02074938 | 0 | 8  | 0          | 0.79906872 |
| chr10 | 132789730 | 132789789 | 60     | 1 | 2 | 4   | 0.6114001  | 0.01077081 | 0 | 9  | 0          | 1.01542894 |
| chr10 | 132789789 | 132853145 | 63357  | 1 | 2 | 4   | 0.6114001  | 0.03812622 | 0 | 7  | 0          | 0.60763643 |
| chr10 | 132853145 | 132853204 | 60     | 1 | 2 | 4   | 0.6114001  | 0.02074938 | 0 | 8  | 0          | 0.79906872 |
| chr10 | 132853204 | 132942572 | 89369  | 2 | 2 | 4   | 0.6114001  | 0.03812622 | 0 | 7  | 0          | 0.60763643 |
| chr10 | 132942572 | 132994372 | 51801  | 1 | 1 | 4   | 0.30102999 | 0.03812622 | 0 | 7  | 0          | 0.60763643 |
| chr10 | 132994372 | 133047449 | 53078  | 2 | 1 | 5   | 0.30102999 | 0.01320236 | 0 | 10 | 0          | 0.97390707 |
| chr10 | 133047449 | 133047508 | 60     | 1 | 1 | 6   | 0.30102999 | 0.00778066 | 0 | 12 | 0          | 1.17038931 |
| chr10 | 133047508 | 133155037 | 107530 | 2 | 1 | 6   | 0.30102999 | 0.01518174 | 0 | 11 | 0          | 0.94496889 |
| chr10 | 133155037 | 133245771 | 90735  | 2 | 2 | 6   | 0.6114001  | 6.86E-04   | 0 | 15 | 0          | 2.02387299 |
| chr10 | 133245771 | 133442209 | 196439 | 2 | 2 | 5   | 0.6114001  | 5.83E-04   | 0 | 14 | 0          | 2.06733314 |
| chr10 | 133442209 | 133536778 | 94570  | 2 | 2 | 6   | 0.6114001  | 0.00166733 | 0 | 14 | 0          | 1.70763027 |
| chr10 | 133536778 | 133536837 | 60     | 1 | 2 | 6   | 0.6114001  | 6.86E-04   | 0 | 15 | 0          | 2.02387299 |
| chr10 | 133536837 | 133626790 | 89954  | 1 | 2 | 5   | 0.6114001  | 0.00141024 | 0 | 13 | 0          | 1.7506523  |
| chr10 | 133626790 | 133626849 | 60     | 1 | 2 | 5   | 0.30102999 | 0.00141024 | 1 | 13 | 0.05404976 | 1.7506523  |
| chr10 | 133626849 | 133749950 | 123102 | 1 | 2 | 5   | 0.6114001  | 0.00141024 | 0 | 13 | 0          | 1.7506523  |
| chr10 | 133749950 | 133831041 | 81092  | 4 | 2 | 5   | 0.6114001  | 2.22E-04   | 0 | 15 | 0          | 2.41659593 |
| chr10 | 133831041 | 133914951 | 83911  | 1 | 1 | 5   | 0.30102999 | 5.83E-04   | 0 | 14 | 0          | 2.06733314 |
| chr10 | 133914951 | 133915010 | 60     | 1 | 1 | 5   | 0.30102999 | 2.22E-04   | 0 | 15 | 0          | 2.41659593 |
| chr10 | 133915010 | 133945590 | 30581  | 1 | 1 | 5   | 0.30102999 | 5.83E-04   | 0 | 14 | 0          | 2.06733314 |
| chr10 | 133945590 | 133945649 | 60     | 1 | 1 | 6   | 0.30102999 | 0.00166733 | 0 | 14 | 0          | 1.70763027 |
| chr10 | 133945649 | 133996915 | 51267  | 1 | 1 | 5   | 0.30102999 | 0.00141024 | 0 | 13 | 0          | 1.7506523  |
| chr10 | 133996915 | 134009001 | 12087  | 2 | 2 | 5   | 0.6114001  | 0.00141024 | 0 | 13 | 0          | 1.7506523  |
| chr10 | 134009001 | 134079982 | 70582  | 1 | 1 | 5   | 0.30102999 | 0.00141024 | 0 | 13 | 0          | 1.7506523  |
| chr10 | 134079982 | 134118807 | 38826  | 2 | 1 | 5   | 0.30102999 | 5.83E-04   | 0 | 14 | 0          | 2.06733314 |
| chr10 | 134118807 | 134136680 | 17874  | 2 | 1 | 6   | 0.1218695  | 0.00166733 | 1 | 14 | 0.1218695  | 1.70763027 |
| chr10 | 134136680 | 134177439 | 40760  | 1 | 1 | 6   | 0.1218695  | 0.00375232 | 1 | 13 | 0.1218695  | 1.42397267 |
| chr10 | 134177439 | 134258887 | 81449  | 2 | 1 | 6   | 0.1218695  | 0.00166733 | 1 | 14 | 0.1218695  | 1.70763027 |
| chr10 | 134258887 | 134339232 | 80346  | 2 | 1 | 6   | 0.1218695  | 6.86E-04   | 1 | 15 | 0.1218695  | 2.02387299 |
| chr10 | 134339232 | 134372824 | 33593  | 1 | 1 | 7   | 0.1218695  | 0.00183109 | 1 | 15 | 0.1218695  | 1.68336908 |
| chr10 | 134372824 | 134505182 | 132359 | 4 | 1 | 8   | 0.1218695  | 0.00188723 | 1 | 16 | 0.1218695  | 1.67551277 |
| chr10 | 134505182 | 134704469 | 19928  | 5 | 1 | 7   | 0.1218695  | 7.41E-04   | 1 | 16 | 0.1218695  | 2.00316618 |
| chr10 | 134704469 | 134753939 | 49471  | 1 | 1 | 7   | 0.1218695  | 0.00183109 | 1 | 15 | 0.1218695  | 1.68336908 |
| chr10 | 134753939 | 134832661 | 78723  | 1 | 1 | 6   | 0.1218695  | 0.00166733 | 1 | 14 | 0.1218695  | 1.70763027 |
| chr10 | 134832661 | 134924296 | 91636  | 3 | 1 | 6   | 0.1218695  | 6.86E-04   | 1 | 15 | 0.1218695  | 2.02387299 |
| chr10 | 134924296 | 134996216 | 71921  | 1 | 1 | 4   | 0.1218695  | 0.00247414 | 1 | 11 | 0.1218695  | 1.52371709 |
| chr10 | 134996216 | 135125545 | 129330 | 7 | 1 | 4   | 0.1218695  | 0.00530919 | 1 | 10 | 0.1218695  | 1.25681219 |
| chr10 | 135125545 | 135194119 | 68575  | 3 | 1 | 3   | 0.1218695  | 0.00170589 | 1 | 10 | 0.1218695  | 1.61091002 |
| chr10 | 135194119 | 135234843 | 40725  | 4 | 1 | 3   | 0.1218695  | 7.28E-04   | 1 | 11 | 0.1218695  | 1.91540774 |
| chr10 | 135234843 | 135352372 | 117530 | 2 | 1 | 2   | 0.1218695  | 9.54E-04   | 1 | 9  | 0.1218695  | 1.74076927 |
| chr10 | 135352372 | 135372492 | 20121  | 3 | 1 | 2   | 0.1218695  | 3.90E-04   | 1 | 10 | 0.1218695  | 2.0620585  |
| chr10 | 135372492 | 135404523 | 32032  | 1 | 2 | 2   | 0.30102999 | 0.00221948 | 0 | 8  | 0          | 1.44210395 |
| chr11 | 218365    | 284838    | 66474  | 2 | 1 | 1   | 0.1218695  | 0.01091611 | 1 | 4  | 0.1218695  | 0.76005302 |
| chr11 | 284838    | 353347    | 68510  | 3 | 1 | 1   | 0.1218695  | 8.47E-04   | 1 | 7  | 0.1218695  | 1.62048027 |
| chr11 | 353347    | 403846    | 50500  | 1 | 2 | 2   | 0.05404976 | 9.54E-04   | 2 | 9  | 0.30102999 | 1.74076927 |
| chr11 | 403846    | 446813    | 42968  | 1 | 1 | 1   | 0.05404976 | 3.39E-04   | 2 | 8  | 0.30102999 | 1.94674965 |
| chr11 | 446813    | 508019    | 61207  | 1 | 1 | 1   | 0.1218695  | 3.39E-04   | 1 | 8  | 0.1218695  | 1.94674965 |
| chr11 | 508019    | 561995    | 53977  | 2 | 1 | 1   | 0.1218695  | 1.30E-04   | 1 | 9  | 0.1218695  | 2.29264207 |
| chr11 | 561995    | 562040    | 46     | 1 | 2 | 2   | 0.1218695  | 9.54E-04   | 1 | 9  | 0.1218695  | 1.74076927 |
| chr11 | 562040    | 594984    | 32945  | 1 | 1 | 1   | 0.1218695  | 1.30E-04   | 1 | 9  | 0.1218695  | 2.29264207 |
| chr11 | 594984    | 770222    | 175239 | 4 | 1 | 1   | 0.05404976 | 1.30E-04   | 1 | 9  | 0.30102999 | 2.29264207 |
| chr11 | 770222    | 770281    | 60     | 1 | 2 | 3   | 0.1575501  | 0.00378107 | 2 | 9  | 0.1575501  | 1.33111237 |
| chr11 | 770281    | 872664    | 102384 | 2 | 1 | 3   | 0.05404976 | 0.00378107 | 2 | 9  | 0.30102999 | 1.33111237 |
| chr11 | 872664    | 984637    | 111974 | 3 | 2 | 3   | 0.1575501  | 0.00378107 | 2 | 9  | 0.1575501  | 1.33111237 |
| chr11 | 984637    | 984692    | 56     | 1 | 3 | 3   | 0.30102999 | 0.00378107 | 2 | 9  | 0.08289318 | 1.33111237 |
| chr11 | 984692    | 1048786   | 64095  | 1 | 2 | 3</ |            |            |   |    |            |            |

|       |         |         |        |   |   |     |            |            |   |    |            |            |
|-------|---------|---------|--------|---|---|-----|------------|------------|---|----|------------|------------|
| chr11 | 2397182 | 2425071 | 27890  | 1 | 1 | 4   | 0.1218695  | 0.00530919 | 1 | 10 | 0.1218695  | 1.2568129  |
| chr11 | 2425071 | 2475746 | 50676  | 3 | 1 | 5   | 0.1218695  | 0.01320236 | 1 | 10 | 0.1218695  | 0.97390707 |
| chr11 | 2475746 | 2475805 | 60     | 1 | 5 | 5   | 0.05404976 | 0.00141024 | 2 | 13 | 0.30102999 | 1.7506523  |
| chr11 | 2475805 | 2542755 | 66951  | 1 | 1 | 5   | 0.05404976 | 0.00317045 | 2 | 12 | 0.30102999 | 1.46403142 |
| chr11 | 2542755 | 2618221 | 75467  | 1 | 1 | 5   | 0.05404976 | 0.02473314 | 2 | 9  | 0.30102999 | 0.76806864 |
| chr11 | 2618221 | 2674253 | 56033  | 1 | 1 | 5   | 0.1218695  | 0.02473314 | 1 | 9  | 0.1218695  | 0.76806864 |
| chr11 | 2674253 | 2718566 | 44314  | 2 | 1 | 5   | 0.1218695  | 0.01320236 | 1 | 10 | 0.1218695  | 0.97390707 |
| chr11 | 2718566 | 2718625 | 60     | 1 | 1 | 5   | 0.1218695  | 0.00317045 | 1 | 12 | 0.1218695  | 1.46403142 |
| chr11 | 2718625 | 2861725 | 143101 | 2 | 1 | 4   | 0.1218695  | 0.00108487 | 1 | 12 | 0.1218695  | 1.81706455 |
| chr11 | 2861725 | 2861784 | 60     | 1 | 1 | 4   | 0.05404976 | 4.45E-04   | 2 | 13 | 0.30102999 | 2.13824703 |
| chr11 | 2861784 | 2904974 | 43191  | 1 | 1 | 4   | 0.05404976 | 0.00108487 | 2 | 12 | 0.30102999 | 1.81706455 |
| chr11 | 2904974 | 2916747 | 11774  | 2 | 1 | 4   | 0.05404976 | 4.45E-04   | 2 | 13 | 0.30102999 | 2.13824703 |
| chr11 | 2916747 | 2949663 | 32917  | 3 | 1 | 5   | 0.05404976 | 0.00141024 | 2 | 13 | 0.30102999 | 1.7506523  |
| chr11 | 2949663 | 2985309 | 35647  | 2 | 1 | 5   | 0.05404976 | 5.83E-04   | 2 | 14 | 0.30102999 | 2.06733314 |
| chr11 | 2985309 | 3039842 | 54534  | 2 | 1 | 5   | 0.1218695  | 5.83E-04   | 1 | 14 | 0.1218695  | 2.06733314 |
| chr11 | 3039842 | 3039901 | 60     | 1 | 1 | 6   | 0.1218695  | 0.00166733 | 1 | 14 | 0.1218695  | 1.70763027 |
| chr11 | 3039901 | 3073629 | 33729  | 1 | 1 | 6   | 0.1218695  | 0.00375523 | 1 | 13 | 0.1218695  | 1.42397267 |
| chr11 | 3073629 | 3073688 | 60     | 1 | 1 | 6   | 0.05404976 | 0.00375523 | 2 | 13 | 0.30102999 | 1.42397267 |
| chr11 | 3073688 | 3153394 | 79707  | 2 | 1 | 5   | 0.1218695  | 0.00141024 | 1 | 13 | 0.1218695  | 1.7506523  |
| chr11 | 3153394 | 3153453 | 60     | 1 | 1 | 6   | 0.1218695  | 0.00375523 | 1 | 13 | 0.1218695  | 1.42397267 |
| chr11 | 3153453 | 3202593 | 49141  | 1 | 1 | 5   | 0.1218695  | 0.00141024 | 1 | 13 | 0.1218695  | 1.7506523  |
| chr11 | 3202593 | 3243558 | 40966  | 2 | 1 | 6   | 0.05404976 | 0.00141024 | 2 | 13 | 0.30102999 | 1.7506523  |
| chr11 | 3243558 | 3381940 | 138383 | 2 | 1 | 6   | 0.05404976 | 0.00375523 | 2 | 12 | 0.30102999 | 1.42397267 |
| chr11 | 3381940 | 3381999 | 60     | 1 | 1 | 7   | 0.05404976 | 0.00859896 | 1 | 13 | 0.30102999 | 1.14735594 |
| chr11 | 3381999 | 3669161 | 287163 | 3 | 1 | 6   | 0.1218695  | 0.00375523 | 1 | 13 | 0.1218695  | 1.42397267 |
| chr11 | 3669161 | 3692385 | 23225  | 6 | 1 | 6   | 0.30102999 | 0.00375523 | 0 | 13 | 0          | 1.42397267 |
| chr11 | 3692385 | 3733447 | 41063  | 3 | 1 | 7   | 0.1218695  | 0.00859896 | 1 | 13 | 0.1218695  | 1.14735594 |
| chr11 | 3733447 | 3793127 | 59681  | 3 | 1 | 7   | 0.05404976 | 0.00413023 | 2 | 14 | 0.30102999 | 1.39918918 |
| chr11 | 3793127 | 3793185 | 59     | 1 | 1 | 8   | 0.05404976 | 0.00909834 | 1 | 14 | 0.30102999 | 1.13428373 |
| chr11 | 3793185 | 3852615 | 59431  | 2 | 1 | 8   | 0.1218695  | 0.01767679 | 1 | 13 | 0.1218695  | 0.91308053 |
| chr11 | 3852615 | 3886853 | 34239  | 2 | 1 | 7   | 0.1218695  | 0.00859896 | 1 | 13 | 0.1218695  | 1.14735594 |
| chr11 | 3886853 | 3987618 | 100766 | 2 | 1 | 5   | 0.30102999 | 0.00141024 | 0 | 13 | 0          | 1.7506523  |
| chr11 | 3987618 | 3987677 | 60     | 1 | 1 | 6   | 0.1218695  | 0.00375523 | 1 | 13 | 0.1218695  | 1.42397267 |
| chr11 | 3987677 | 4061418 | 73742  | 1 | 1 | 5   | 0.30102999 | 0.00141024 | 0 | 13 | 0          | 1.7506523  |
| chr11 | 4061418 | 4127246 | 65829  | 1 | 1 | 5   | 0.30102999 | 0.00317045 | 0 | 12 | 0          | 1.46403142 |
| chr11 | 4127246 | 4175364 | 48119  | 2 | 1 | 6   | 0.30102999 | 0.00778066 | 0 | 12 | 0          | 1.17038931 |
| chr11 | 4175364 | 4175423 | 60     | 1 | 1 | 7   | 0.30102999 | 0.01667721 | 0 | 12 | 0          | 0.92532268 |
| chr11 | 4175423 | 4272812 | 97390  | 1 | 1 | 7   | 0.30102999 | 0.03037338 | 0 | 11 | 0          | 0.73110763 |
| chr11 | 4272812 | 4406219 | 133408 | 2 | 1 | 7   | 0.30102999 | 0.01667721 | 0 | 12 | 0          | 0.92532268 |
| chr11 | 4406219 | 4594629 | 188411 | 5 | 1 | 7   | 0.30102999 | 0.00413023 | 0 | 14 | 0          | 1.39918918 |
| chr11 | 4594629 | 4596397 | 1769   | 2 | 1 | 7   | 0.30102999 | 0.00183109 | 0 | 15 | 0          | 1.68336308 |
| chr11 | 4596397 | 5010854 | 414458 | 8 | 1 | 7   | 0.30102999 | 0.00413023 | 0 | 14 | 0          | 1.39918918 |
| chr11 | 5010854 | 5081198 | 70345  | 3 | 1 | 7   | 0.30102999 | 0.00183109 | 0 | 15 | 0          | 1.68336308 |
| chr11 | 5081198 | 5173297 | 92100  | 2 | 1 | 7   | 0.30102999 | 0.00413023 | 0 | 14 | 0          | 1.39918918 |
| chr11 | 5173297 | 5392466 | 219170 | 9 | 1 | 7   | 0.30102999 | 0.00183109 | 0 | 15 | 0          | 1.68336308 |
| chr11 | 5392466 | 5614439 | 221974 | 5 | 1 | 6   | 0.30102999 | 0.01667721 | 0 | 14 | 0          | 1.70763027 |
| chr11 | 5614439 | 5655948 | 41510  | 4 | 1 | 7   | 0.30102999 | 0.00413023 | 0 | 14 | 0          | 1.39918918 |
| chr11 | 5655948 | 5727098 | 71151  | 4 | 1 | 7   | 0.1218695  | 0.00413023 | 1 | 14 | 0.1218695  | 1.39918918 |
| chr11 | 5727098 | 5773545 | 46448  | 2 | 1 | 7   | 0.1218695  | 0.00183109 | 1 | 15 | 0.1218695  | 1.68336308 |
| chr11 | 5773545 | 5805665 | 32121  | 2 | 1 | 7   | 0.1218695  | 7.41E-04   | 1 | 16 | 0.1218695  | 2.00316618 |
| chr11 | 5805665 | 6102019 | 296355 | 5 | 1 | 7   | 0.1218695  | 0.00183109 | 1 | 15 | 0.1218695  | 1.68336308 |
| chr11 | 6102019 | 6102078 | 60     | 1 | 1 | 8   | 0.05404976 | 0.00433294 | 2 | 15 | 0.30102999 | 1.3873209  |
| chr11 | 6102078 | 6232603 | 130526 | 5 | 1 | 7   | 0.05404976 | 0.00183109 | 1 | 15 | 0.30102999 | 1.68336308 |
| chr11 | 6232603 | 6254886 | 22284  | 1 | 1 | 7   | 0.1218695  | 0.00183109 | 1 | 15 | 0.1218695  | 1.68336308 |
| chr11 | 6254886 | 6282812 | 27927  | 1 | 1 | 7   | 0.1218695  | 0.00413023 | 1 | 14 | 0.1218695  | 1.39918918 |
| chr11 | 6282812 | 6282871 | 60     | 1 | 1 | 7   | 0.05404976 | 0.00413023 | 2 | 14 | 0.30102999 | 1.39918918 |
| chr11 | 6282871 | 6340301 | 57431  | 2 | 1 | 7   | 0.05404976 | 0.03037338 | 1 | 11 | 0.30102999 | 0.73110763 |
| chr11 | 6340301 | 6457436 | 117136 | 5 | 1 | 7   | 0.05404976 | 0.01667721 | 1 | 12 | 0.30102999 | 0.92532268 |
| chr11 | 6457436 | 6503772 | 46337  | 5 | 1 | 8   | 0.05404976 | 0.03209037 | 1 | 12 | 0.30102999 | 0.72109894 |
| chr11 | 6503772 | 6592660 | 88889  | 2 | 1 | 7   | 0.05404976 | 0.01667721 | 2 | 12 | 0.30102999 | 0.92532268 |
| chr11 | 6592660 | 6621239 | 28580  | 2 | 1 | 6   | 0.05404976 | 0.00778066 | 2 | 12 | 0.30102999 | 1.17038931 |
| chr11 | 6621239 | 6639238 | 18000  | 4 | 1 | 6   | 0.05404976 | 0.01518174 | 1 | 11 | 0.30102999 | 0.9449689  |
| chr11 | 6639238 | 6639297 | 60     | 1 | 1 | 6   | 0.05404976 | 0.00778066 | 2 | 12 | 0.30102999 | 1.17038931 |
| chr11 | 6639297 | 6675974 | 36678  | 2 | 1 | 5   | 0.05404976 | 0.00317045 | 1 | 12 | 0.30102999 | 1.46403142 |
| chr11 | 6675974 | 6766031 | 58     | 1 | 1 | 7   | 0.05404976 | 0.01667721 | 2 | 12 | 0.30102999 | 0.92532268 |
| chr11 | 6766031 | 6703078 | 27048  | 1 | 1 | 6   | 0.05404976 | 0.00778066 | 2 | 12 | 0.30102999 | 1.17038931 |
| chr11 | 6703078 | 6816185 | 113108 | 2 | 1 | 5   | 0.05404976 | 0.00317045 | 2 | 12 | 0.30102999 | 1.46403142 |
| chr11 | 6816185 | 6920018 | 103834 | 3 | 1 | 3   | 0.05404976 | 2.93E-04   | 2 | 12 | 0.30102999 | 2.24559516 |
| chr11 | 6920018 | 6920077 | 60     | 1 | 1 | 4   | 0.05404976 | 0.00108487 | 2 | 12 | 0.30102999 | 1.81706455 |
| chr11 | 6920077 | 7040544 | 120468 | 3 | 1 | 3   | 0.05404976 | 7.28E-04   | 2 | 11 | 0.30102999 | 1.91540774 |
| chr11 | 7040544 | 7040603 | 60     | 1 | 1 | 4   | 0.05404976 | 0.00108487 | 2 | 12 | 0.30102999 | 1.81706455 |
| chr11 | 7040603 | 7091552 | 50950  | 2 | 1 | 3   | 0.05404976 | 7.28E-04   | 2 | 11 | 0.30102999 | 1.91540774 |
| chr11 | 7091552 | 7160345 | 68794  | 3 | 1 | 3   | 0.05404976 | 2.93E-04   | 2 | 12 | 0.30102999 | 2.24559516 |
| chr11 | 7160345 | 7278825 | 118481 | 2 | 1 | 3   | 0.05404976 | 7.28E-04   | 2 | 11 | 0.30102999 | 1.91540774 |
| chr11 | 7278825 | 7327235 | 48411  | 2 | 1 | 3   | 0.05404976 | 2.93E-04   | 2 | 12 | 0.30102999 | 2.24559516 |
| chr11 | 7327235 | 7353055 | 25821  | 1 | 1 | 3   | 0.05404976 | 7.28E-04   | 2 | 11 | 0.30102999 | 1.91540774 |
| chr11 | 7353055 | 7378670 | 25616  | 2 | 1 | 4   | 0.05404976 | 0.00247414 | 2 | 11 | 0.30102999 | 1.52371709 |
| chr11 | 7378670 | 7447256 | 68587  | 2 | 1 | 4   | 0.05404976 | 0.00108487 | 2 | 12 | 0.30102999 | 1.81706455 |
| chr11 | 7447256 | 7465744 | 18489  | 2 | 1 | 5   | 0.05404976 | 0.00317045 | 2 | 12 | 0.30102999 | 1.46403142 |
| chr11 | 7465744 | 7575495 | 109752 | 2 | 1 | 5   | 0.05404976 | 0.00666883 | 2 | 11 | 0.30102999 | 1.20557689 |
| chr11 | 7575495 | 7575553 | 59     | 1 | 1 | 5   | 0.05404976 | 0.00317045 | 2 | 12 | 0.30102999 | 1.46403142 |
| chr11 | 7575553 | 7616545 | 40993  | 1 | 1 | 5   | 0.05404976 | 0.00666883 | 2 | 11 | 0.30102999 | 1.20557689 |
| chr11 | 7616545 | 7634854 | 18310  | 1 | 1 | 5   | 0.05404976 | 0.01320236 | 2 | 10 | 0.30102999 | 0.97390707 |
| chr11 | 7634854 | 7660068 | 25215  | 1 | 1 | 5   | 0.05404976 | 0.02473314 | 2 | 9  | 0.30102999 | 0.76806864 |
| chr11 | 7660068 | 7712477 | 52410  | 2 | 1 | 4   | 0.05404976 | 0.01077081 | 2 | 9  | 0.30102999 | 1.01542894 |
| chr11 | 7712477 | 7931094 | 218618 | 7 | 1 | 5   | 0.05404976 | 0.02473314 | 2 | 9  | 0.30102999 | 0.76806864 |
| chr11 | 7931094 | 7981483 | 50390  | 1 | 1 | 5   | 0.05404976 | 0.04407651 | 2 | 8  | 0.30102999 | 0.58747015 |
| chr11 | 7981483 | 7981540 | 58     | 1 | 1 | 5   | 0.05404976 | 0.02473314 | 2 | 9  | 0.30102999 | 0.76806864 |
| chr11 | 7981540 | 8016220 | 34681  | 1 | 1 | 4   | 0.05404976 | 0.02074938 | 2 | 8  | 0.30102999 | 0.79906872 |
| chr11 | 8016220 | 8075884 | 59665  | 1 | 1 | 3   | 0.05404976 | 0.0079614  | 2 | 8  | 0.30102999 | 1.07548421 |
| chr11 | 8075884 | 8161528 | 85645  | 4 | 1 | 3   | 0.05404976 | 0.00378107 | 2 | 9  | 0.30102999 | 1.33111237 |
| chr11 | 8161528 | 8257457 | 95930  | 3 | 1 | 3</ |            |            |   |    |            |            |

|       |          |          |        |   |   |   |            |            |   |    |            |            |
|-------|----------|----------|--------|---|---|---|------------|------------|---|----|------------|------------|
| chr11 | 11094778 | 11094837 | 60     | 1 | 2 | 3 | 0.1575501  | 0.00170589 | 2 | 10 | 0.1575501  | 1.61091002 |
| chr11 | 11094837 | 11310311 | 215475 | 2 | 2 | 2 | 0.30102999 | 9.54E-04   | 1 | 9  | 0.05404976 | 1.74076927 |
| chr11 | 11310311 | 11368811 | 58501  | 2 | 2 | 2 | 0.30102999 | 3.90E-04   | 1 | 10 | 0.05404976 | 2.0620585  |
| chr11 | 11368811 | 11395953 | 27143  | 2 | 2 | 4 | 0.30102999 | 0.00530919 | 1 | 10 | 0.05404976 | 1.2568129  |
| chr11 | 11395953 | 11521697 | 125745 | 3 | 2 | 5 | 0.30102999 | 0.01320236 | 1 | 10 | 0.05404976 | 0.97390707 |
| chr11 | 11521697 | 11614411 | 92715  | 2 | 2 | 4 | 0.30102999 | 0.01077081 | 1 | 9  | 0.05404976 | 1.01542894 |
| chr11 | 11614411 | 11906064 | 291654 | 3 | 2 | 3 | 0.30102999 | 0.00378107 | 1 | 9  | 0.05404976 | 1.33111237 |
| chr11 | 11906064 | 11924291 | 18228  | 2 | 2 | 4 | 0.30102999 | 0.01077081 | 1 | 9  | 0.05404976 | 1.01542894 |
| chr11 | 11924291 | 11978280 | 53990  | 4 | 2 | 4 | 0.30102999 | 0.00530919 | 1 | 10 | 0.05404976 | 1.2568129  |
| chr11 | 11978280 | 11984479 | 6200   | 1 | 2 | 4 | 0.30102999 | 0.02074938 | 1 | 8  | 0.05404976 | 0.79906872 |
| chr11 | 11984479 | 11985627 | 1149   | 2 | 2 | 5 | 0.30102999 | 0.04407651 | 1 | 8  | 0.05404976 | 0.58747015 |
| chr11 | 11985627 | 12051354 | 65728  | 2 | 2 | 4 | 0.30102999 | 0.02074938 | 1 | 8  | 0.05404976 | 0.79906872 |
| chr11 | 12051354 | 12051413 | 60     | 1 | 2 | 5 | 0.30102999 | 0.04407651 | 1 | 8  | 0.05404976 | 0.58747015 |
| chr11 | 12051413 | 12143390 | 91978  | 1 | 2 | 4 | 0.30102999 | 0.02074938 | 1 | 8  | 0.05404976 | 0.79906872 |
| chr11 | 12143390 | 12229467 | 86078  | 5 | 2 | 4 | 0.30102999 | 0.01077081 | 1 | 9  | 0.05404976 | 1.01542894 |
| chr11 | 12229467 | 12316138 | 86672  | 5 | 2 | 5 | 0.30102999 | 0.02473314 | 1 | 9  | 0.05404976 | 0.76806864 |
| chr11 | 12316138 | 12363908 | 47771  | 3 | 2 | 7 | 0.30102999 | 0.08584816 | 1 | 9  | 0.05404976 | 0.42015402 |
| chr11 | 12363908 | 12452212 | 88305  | 4 | 2 | 7 | 0.30102999 | 0.05232577 | 1 | 10 | 0.05404976 | 0.56314362 |
| chr11 | 12452212 | 12551725 | 99514  | 2 | 2 | 6 | 0.30102999 | 0.02793176 | 1 | 10 | 0.05404976 | 0.74627054 |
| chr11 | 12551725 | 12800688 | 248964 | 4 | 2 | 7 | 0.30102999 | 0.05232577 | 1 | 10 | 0.05404976 | 0.56314362 |
| chr11 | 12800688 | 12848899 | 48212  | 2 | 2 | 7 | 0.1575501  | 0.05232577 | 2 | 9  | 0.1575501  | 0.52015402 |
| chr11 | 12848899 | 12896991 | 47193  | 2 | 2 | 6 | 0.1575501  | 0.08584816 | 2 | 9  | 0.1575501  | 0.42015402 |
| chr11 | 12896991 | 12923577 | 27487  | 1 | 2 | 6 | 0.30102999 | 0.04875588 | 1 | 9  | 0.05404976 | 0.57322308 |
| chr11 | 12923577 | 12983369 | 59793  | 1 | 2 | 5 | 0.30102999 | 0.02473314 | 1 | 9  | 0.05404976 | 0.76806864 |
| chr11 | 12983369 | 12983428 | 60     | 1 | 2 | 5 | 0.30102999 | 0.01320236 | 1 | 10 | 0.05404976 | 0.97390707 |
| chr11 | 12983428 | 13226395 | 24298  | 2 | 2 | 5 | 0.30102999 | 0.04407651 | 1 | 8  | 0.05404976 | 0.58747015 |
| chr11 | 13226395 | 13226454 | 60     | 1 | 2 | 5 | 0.30102999 | 0.02473314 | 1 | 9  | 0.05404976 | 0.76806864 |
| chr11 | 13226454 | 13331564 | 105111 | 3 | 2 | 3 | 0.61140001 | 0.00378107 | 0 | 9  | 0          | 1.33111237 |
| chr11 | 13331564 | 13351481 | 19918  | 1 | 2 | 3 | 0.61140001 | 0.03070643 | 0 | 6  | 0          | 0.63695542 |
| chr11 | 13351481 | 13371506 | 20026  | 2 | 2 | 3 | 0.30102999 | 0.03070643 | 1 | 6  | 0.05404976 | 0.63695542 |
| chr11 | 13371506 | 13412886 | 41381  | 2 | 2 | 3 | 0.1575501  | 0.03070643 | 2 | 6  | 0.1575501  | 0.63695542 |
| chr11 | 13412886 | 13412945 | 60     | 1 | 2 | 3 | 0.1575501  | 0.01598258 | 2 | 7  | 0.1575501  | 0.84395715 |
| chr11 | 13412945 | 13484163 | 71219  | 2 | 2 | 3 | 0.1575501  | 0.03070643 | 2 | 6  | 0.1575501  | 0.63695542 |
| chr11 | 13484163 | 13514371 | 30209  | 2 | 2 | 3 | 0.1575501  | 0.01598258 | 2 | 7  | 0.1575501  | 0.84395715 |
| chr11 | 13514371 | 13514430 | 60     | 1 | 2 | 4 | 0.1575501  | 0.02074938 | 2 | 8  | 0.1575501  | 0.79906872 |
| chr11 | 13514430 | 13666963 | 152534 | 2 | 2 | 3 | 0.1575501  | 0.0079614  | 2 | 8  | 0.1575501  | 1.07548421 |
| chr11 | 13666963 | 13705717 | 38755  | 3 | 2 | 4 | 0.1575501  | 0.02074938 | 2 | 8  | 0.1575501  | 0.79906872 |
| chr11 | 13705717 | 13952761 | 247045 | 4 | 2 | 3 | 0.1575501  | 0.0079614  | 2 | 8  | 0.1575501  | 1.07548421 |
| chr11 | 13952761 | 13991832 | 39072  | 1 | 2 | 3 | 0.30102999 | 0.0079614  | 1 | 8  | 0.05404976 | 1.07548421 |
| chr11 | 13991832 | 14034589 | 42758  | 2 | 2 | 3 | 0.30102999 | 0.00378107 | 1 | 9  | 0.05404976 | 1.33111237 |
| chr11 | 14034589 | 14034648 | 60     | 1 | 2 | 3 | 0.30102999 | 0.00170589 | 1 | 10 | 0.05404976 | 1.61091002 |
| chr11 | 14034648 | 14157083 | 122436 | 2 | 2 | 3 | 0.30102999 | 0.0079614  | 1 | 8  | 0.05404976 | 1.07548421 |
| chr11 | 14157083 | 14224682 | 67600  | 2 | 2 | 3 | 0.30102999 | 0.00378107 | 1 | 9  | 0.05404976 | 1.33111237 |
| chr11 | 14224682 | 14224741 | 60     | 1 | 2 | 3 | 0.30102999 | 0.00170589 | 1 | 10 | 0.05404976 | 1.61091002 |
| chr11 | 14224741 | 14362224 | 137484 | 4 | 2 | 3 | 0.30102999 | 0.00378107 | 1 | 9  | 0.05404976 | 1.33111237 |
| chr11 | 14362224 | 14362283 | 60     | 1 | 2 | 3 | 0.1575501  | 0.00378107 | 2 | 9  | 0.1575501  | 1.33111237 |
| chr11 | 14362283 | 14379102 | 16820  | 1 | 2 | 3 | 0.1575501  | 0.0079614  | 2 | 8  | 0.1575501  | 1.07548421 |
| chr11 | 14379102 | 14512134 | 133033 | 2 | 2 | 3 | 0.30102999 | 0.0079614  | 1 | 8  | 0.05404976 | 1.07548421 |
| chr11 | 14512134 | 14512193 | 60     | 1 | 2 | 3 | 0.30102999 | 0.00378107 | 1 | 9  | 0.05404976 | 1.33111237 |
| chr11 | 14512193 | 14570871 | 58679  | 2 | 2 | 3 | 0.61140001 | 0.0079614  | 0 | 8  | 0          | 1.07548421 |
| chr11 | 14570871 | 14659210 | 88340  | 4 | 2 | 3 | 0.61140001 | 0.00378107 | 0 | 9  | 0          | 1.33111237 |
| chr11 | 14659210 | 14709082 | 49873  | 1 | 2 | 3 | 0.61140001 | 0.01598258 | 0 | 7  | 0          | 0.84395715 |
| chr11 | 14709082 | 14768905 | 58424  | 2 | 2 | 3 | 0.30102999 | 0.01598258 | 1 | 7  | 0.05404976 | 0.84395715 |
| chr11 | 14768905 | 14853301 | 84397  | 3 | 2 | 3 | 0.30102999 | 0.00378107 | 1 | 9  | 0.05404976 | 1.33111237 |
| chr11 | 14853301 | 14888973 | 135673 | 3 | 2 | 3 | 0.61140001 | 0.0079614  | 0 | 8  | 0          | 1.07548421 |
| chr11 | 14888973 | 14991115 | 2143   | 2 | 2 | 4 | 0.61140001 | 0.02074938 | 0 | 8  | 0          | 0.79906872 |
| chr11 | 14991115 | 15028697 | 37583  | 2 | 2 | 2 | 0.61140001 | 0.00221948 | 0 | 8  | 0          | 1.44210395 |
| chr11 | 15028697 | 15100083 | 71387  | 2 | 2 | 3 | 0.61140001 | 0.0079614  | 0 | 8  | 0          | 1.07548421 |
| chr11 | 15100083 | 15213597 | 113515 | 2 | 2 | 4 | 0.30102999 | 0.02074938 | 1 | 8  | 0.05404976 | 0.79906872 |
| chr11 | 15213597 | 15261726 | 48130  | 3 | 2 | 3 | 0.30102999 | 0.0079614  | 1 | 8  | 0.05404976 | 1.07548421 |
| chr11 | 15261726 | 15261785 | 60     | 1 | 2 | 3 | 0.1575501  | 0.0079614  | 1 | 8  | 0.1575501  | 1.07548421 |
| chr11 | 15261785 | 15406551 | 144767 | 1 | 2 | 2 | 0.30102999 | 0.00221948 | 1 | 8  | 0.05404976 | 1.44210395 |
| chr11 | 15406551 | 15406610 | 60     | 1 | 2 | 3 | 0.30102999 | 0.0079614  | 1 | 8  | 0.05404976 | 1.07548421 |
| chr11 | 15406610 | 15667251 | 260642 | 1 | 2 | 1 | 0.30102999 | 3.39E-04   | 1 | 8  | 0.05404976 | 1.94674965 |
| chr11 | 15667251 | 15781823 | 114573 | 2 | 1 | 2 | 0.30102999 | 8.47E-04   | 1 | 7  | 0.05404976 | 1.62048027 |
| chr11 | 15781823 | 15781882 | 60     | 1 | 2 | 1 | 0.30102999 | 0.00493743 | 1 | 7  | 0.05404976 | 1.16581773 |
| chr11 | 15781882 | 15995789 | 213908 | 2 | 2 | 0 | 0.30102999 | 0.00170589 | 0 | 1  | 4          | 1.26272838 |
| chr11 | 15995789 | 16027746 | 31958  | 2 | 2 | 0 | 0.1575501  | 0          | 2 | 4  | 1.26272838 |            |
| chr11 | 16027746 | 16027805 | 60     | 1 | 2 | 2 | 0.1575501  | 0.00204627 | 2 | 6  | 0.1575501  | 1.31360226 |
| chr11 | 16027805 | 16122782 | 94978  | 2 | 2 | 0 | 0.1575501  | 0          | 2 | 5  | 1.60515106 |            |
| chr11 | 16122782 | 16122841 | 60     | 1 | 2 | 1 | 0.1575501  | 0          | 2 | 5  | 1.60515106 |            |
| chr11 | 16122841 | 16302150 | 179310 | 4 | 2 | 0 | 0.1575501  | 0.00478973 | 2 | 4  | 0.1575501  | 1.02643191 |
| chr11 | 16302150 | 16502568 | 200419 | 5 | 2 | 0 | 0.30102999 | 0          | 2 | 4  | 1.26272838 |            |
| chr11 | 16502568 | 16593589 | 91022  | 2 | 2 | 1 | 0.30102999 | 0.01091641 | 2 | 4  | 0.08289318 | 0.76005302 |
| chr11 | 16593589 | 16593648 | 60     | 1 | 2 | 1 | 0.30102999 | 0.00204627 | 2 | 6  | 0.08289318 | 1.31360226 |
| chr11 | 16593648 | 16922315 | 328668 | 6 | 3 | 1 | 0.30102999 | 0.00478973 | 2 | 5  | 0.08289318 | 1.02643191 |
| chr11 | 16922315 | 16922374 | 60     | 1 | 2 | 2 | 0.30102999 | 0.02162467 | 2 | 5  | 0.08289318 | 0.68214471 |
| chr11 | 16922374 | 17001335 | 78962  | 2 | 1 | 1 | 0.30102999 | 0.00478973 | 2 | 5  | 0.08289318 | 1.02643191 |
| chr11 | 17001335 | 17124338 | 123004 | 4 | 2 | 2 | 0.30102999 | 0.02162467 | 2 | 5  | 0.08289318 | 0.68214471 |
| chr11 | 17124338 | 17144330 | 19993  | 2 | 2 | 2 | 0.17593012 | 0.02162467 | 3 | 5  | 0.17593012 | 0.68214471 |
| chr11 | 17144330 | 17190929 | 46600  | 1 | 2 | 2 | 0.30102999 | 0.02162467 | 2 | 5  | 0.08289318 | 0.68214471 |
| chr11 | 17190929 | 17223356 | 32428  | 2 | 2 | 2 | 0.30102999 | 0.01053319 | 2 | 6  | 0.08289318 | 0.91219088 |
| chr11 | 17223356 | 17223415 | 60     | 1 | 2 | 2 | 0.17593012 | 0.01053319 | 3 | 6  | 0.17593012 | 0.91219088 |
| chr11 | 17223415 | 17270775 | 47361  | 1 | 3 | 2 | 0.17593012 | 0.02162467 | 3 | 5  | 0.17593012 | 0.68214471 |
| chr11 | 17270775 | 17270834 | 60     | 1 | 2 | 2 | 0.17593012 | 0.01053319 | 3 | 6  | 0.17593012 | 0.91219088 |
| chr11 | 17270834 | 17306149 | 35316  | 2 | 2 | 2 | 0.30102999 | 0.01053319 | 2 | 6  | 0.08289318 | 0.91219088 |
| chr11 | 17306149 | 17352436 | 46288  | 3 | 2 | 2 | 0.30102999 | 0.00493743 | 2 | 6  | 0.08289318 | 1.16581773 |
| chr11 | 17352436 | 17352494 | 59     | 1 | 2 | 2 | 0.17593012 | 0.00493743 | 3 | 7  | 0.17593012 | 1.16581773 |
| chr11 | 17352494 | 17414466 | 61973  | 2 | 2 | 2 | 0.30102999 | 0.00493743 | 2 | 7  | 0.08289318 | 1.16581773 |
| chr11 | 17414466 | 17495767 | 81302  | 2 | 2 | 2 | 0.30102999 | 0.01053319 | 2 | 6  | 0.08289318 | 0.91219088 |
| chr11 | 17495767 | 17495826 | 60     | 1 | 4 | 2 | 0.47744371 | 0.00221948 | 6 | 8  | 0.04291    |            |

|       |          |          |        |    |   |   |            |            |   |   |            |            |
|-------|----------|----------|--------|----|---|---|------------|------------|---|---|------------|------------|
| chr11 | 19430644 | 19458752 | 28109  | 1  | 3 | 1 | 0.30102999 | 8.47E-04   | 2 | 7 | 0.08289318 | 1.62048027 |
| chr11 | 19458752 | 19458811 | 60     | 1  | 3 | 1 | 0.17593012 | 8.47E-04   | 3 | 7 | 0.17593012 | 1.62048027 |
| chr11 | 19458811 | 19514209 | 55399  | 1  | 3 | 1 | 0.30102999 | 8.47E-04   | 2 | 7 | 0.08289318 | 1.62048027 |
| chr11 | 19514209 | 19591508 | 77300  | 2  | 3 | 1 | 0.30102999 | 3.39E-04   | 2 | 8 | 0.08289318 | 1.96474965 |
| chr11 | 19591508 | 19664553 | 73046  | 1  | 3 | 1 | 0.30102999 | 8.47E-04   | 2 | 7 | 0.08289318 | 1.62048027 |
| chr11 | 19664553 | 19739690 | 75138  | 1  | 2 | 1 | 0.30102999 | 8.47E-04   | 1 | 7 | 0.05404976 | 1.62048027 |
| chr11 | 19739690 | 19739749 | 60     | 1  | 2 | 1 | 0.30102999 | 0.00221948 | 1 | 8 | 0.05404976 | 1.44210395 |
| chr11 | 19739749 | 19793641 | 53893  | 1  | 2 | 1 | 0.30102999 | 3.39E-04   | 1 | 8 | 0.05404976 | 1.96474965 |
| chr11 | 19793641 | 19825909 | 32269  | 1  | 2 | 1 | 0.30102999 | 8.47E-04   | 1 | 7 | 0.05404976 | 1.62048027 |
| chr11 | 19825909 | 19825968 | 60     | 1  | 2 | 1 | 0.30102999 | 0.00493743 | 2 | 7 | 0.08289318 | 1.16581773 |
| chr11 | 19825968 | 19883334 | 57367  | 1  | 3 | 2 | 0.51676182 | 0.00493743 | 1 | 7 | 0.02438896 | 1.16581773 |
| chr11 | 19883334 | 19905869 | 22536  | 2  | 3 | 2 | 0.51676182 | 0.00221948 | 1 | 8 | 0.02438896 | 1.44210395 |
| chr11 | 19905869 | 19965281 | 59413  | 2  | 3 | 2 | 0.51676182 | 9.54E-04   | 1 | 9 | 0.02438896 | 1.74076927 |
| chr11 | 19965281 | 19965340 | 60     | 1  | 2 | 2 | 0.30102999 | 9.54E-04   | 2 | 9 | 0.08289318 | 1.74076927 |
| chr11 | 19965340 | 20083899 | 118560 | 2  | 3 | 2 | 0.51676182 | 9.54E-04   | 1 | 9 | 0.02438896 | 1.74076927 |
| chr11 | 20083899 | 20141561 | 57663  | 3  | 2 | 2 | 0.51676182 | 0.00221948 | 1 | 8 | 0.02438896 | 1.44210395 |
| chr11 | 20141561 | 20218948 | 77388  | 2  | 4 | 2 | 0.76005302 | 0.00221948 | 1 | 8 | 0.01091641 | 1.44210395 |
| chr11 | 20218948 | 20219007 | 60     | 1  | 4 | 2 | 0.47744371 | 9.54E-04   | 2 | 9 | 0.0429175  | 1.74076927 |
| chr11 | 20219007 | 20439739 | 220733 | 4  | 3 | 2 | 0.30102999 | 9.54E-04   | 2 | 9 | 0.08289318 | 1.74076927 |
| chr11 | 20439739 | 20483972 | 44234  | 3  | 2 | 2 | 0.17593012 | 9.54E-04   | 3 | 9 | 0.17593012 | 1.74076927 |
| chr11 | 20483972 | 20620987 | 137026 | 2  | 3 | 2 | 0.17593012 | 0.00221948 | 3 | 8 | 0.17593012 | 1.44210395 |
| chr11 | 20620987 | 20621056 | 60     | 1  | 3 | 2 | 0.10122019 | 0.00221948 | 4 | 8 | 0.30102999 | 1.44210395 |
| chr11 | 20621056 | 20668383 | 47328  | 1  | 3 | 2 | 0.17593012 | 0.00221948 | 1 | 3 | 0.17593012 | 1.44210395 |
| chr11 | 20668383 | 20804865 | 136483 | 4  | 3 | 2 | 0.17593012 | 9.54E-04   | 3 | 9 | 0.17593012 | 1.74076927 |
| chr11 | 20804865 | 21020109 | 215245 | 4  | 3 | 2 | 0.30102999 | 9.54E-04   | 2 | 9 | 0.08289318 | 1.74076927 |
| chr11 | 21020109 | 21099960 | 79852  | 2  | 3 | 2 | 0.51676182 | 9.54E-04   | 1 | 9 | 0.02438896 | 1.74076927 |
| chr11 | 21099960 | 21210098 | 110139 | 2  | 3 | 2 | 0.51676182 | 0.00221948 | 1 | 9 | 0.02438896 | 1.44210395 |
| chr11 | 21210098 | 21272754 | 62657  | 2  | 3 | 2 | 0.51676182 | 0.00493743 | 1 | 7 | 0.02438896 | 1.16581773 |
| chr11 | 21272754 | 21366340 | 93587  | 3  | 3 | 2 | 0.51676182 | 0.00221948 | 1 | 8 | 0.02438896 | 1.44210395 |
| chr11 | 21366340 | 21366399 | 60     | 1  | 3 | 2 | 0.51676182 | 9.54E-04   | 1 | 9 | 0.02438896 | 1.74076927 |
| chr11 | 21366399 | 21464425 | 98027  | 2  | 3 | 2 | 0.51676182 | 0.00221948 | 1 | 8 | 0.02438896 | 1.44210395 |
| chr11 | 21464425 | 21503026 | 38602  | 1  | 2 | 2 | 0.30102999 | 0.01053319 | 1 | 6 | 0.05404976 | 0.91219088 |
| chr11 | 21503026 | 21503085 | 60     | 1  | 2 | 2 | 0.1575501  | 0.01053319 | 2 | 6 | 0.1575501  | 0.91219088 |
| chr11 | 21503085 | 21549682 | 46598  | 1  | 2 | 2 | 0.1575501  | 0.02162467 | 2 | 5 | 0.1575501  | 0.68214471 |
| chr11 | 21549682 | 21596843 | 47162  | 2  | 2 | 2 | 0.1575501  | 0.01053319 | 2 | 6 | 0.1575501  | 0.91219088 |
| chr11 | 21596843 | 21859560 | 262718 | 2  | 2 | 2 | 0.30102999 | 0.01053319 | 1 | 6 | 0.05404976 | 0.91219088 |
| chr11 | 21859560 | 21859619 | 60     | 1  | 2 | 2 | 0.08289318 | 0.00493743 | 3 | 7 | 0.30102999 | 1.16581773 |
| chr11 | 21859619 | 22137207 | 277589 | 1  | 2 | 2 | 0.1575501  | 0.00493743 | 2 | 7 | 0.1575501  | 1.16581773 |
| chr11 | 22137207 | 22301894 | 164688 | 2  | 2 | 1 | 0.30102999 | 0.00478973 | 1 | 5 | 0.05404976 | 1.02643191 |
| chr11 | 22301894 | 22399498 | 97605  | 3  | 2 | 1 | 0.30102999 | 0.01091641 | 1 | 4 | 0.05404976 | 0.76005302 |
| chr11 | 22399498 | 22467574 | 77077  | 1  | 1 | 1 | 0.1218695  | 0.02438896 | 1 | 3 | 0.1218695  | 0.51676182 |
| chr11 | 22467574 | 22644572 | 167999 | 1  | 1 | 1 | 0.1218695  | 0.05404976 | 2 | 2 | 0.1218695  | 0.30102999 |
| chr11 | 22644572 | 22833595 | 189024 | 8  | 1 | 1 | 0.1218695  | 0.02438896 | 1 | 3 | 0.1218695  | 0.51676182 |
| chr11 | 22833595 | 23160039 | 326445 | 3  | 1 | 1 | 0.1218695  | 0.01091641 | 1 | 4 | 0.1218695  | 0.76005302 |
| chr11 | 23160039 | 23445008 | 284970 | 1  | 1 | 1 | 0.1218695  | 0.02438896 | 1 | 3 | 0.1218695  | 0.51676182 |
| chr11 | 23445008 | 23445067 | 60     | 1  | 1 | 1 | 0.1218695  | 0.01091641 | 1 | 4 | 0.1218695  | 0.76005302 |
| chr11 | 23445067 | 23710376 | 265310 | 1  | 1 | 1 | 0.1218695  | 0.02438896 | 1 | 3 | 0.1218695  | 0.51676182 |
| chr11 | 23710376 | 23710435 | 60     | 1  | 2 | 1 | 0.30102999 | 0.02438896 | 3 | 3 | 0.05404976 | 0.51676182 |
| chr11 | 23710435 | 24063998 | 353564 | 3  | 1 | 1 | 0.1218695  | 0.02438896 | 1 | 3 | 0.1218695  | 0.51676182 |
| chr11 | 24063998 | 24280229 | 216232 | 2  | 1 | 1 | 0.1218695  | 0.01091641 | 1 | 4 | 0.1218695  | 0.76005302 |
| chr11 | 24280229 | 24280288 | 60     | 1  | 2 | 1 | 0.30102999 | 0.01091641 | 1 | 4 | 0.05404976 | 0.76005302 |
| chr11 | 24280288 | 24476279 | 195992 | 2  | 1 | 1 | 0.30102999 | 0.02438896 | 3 | 3 | 0.05404976 | 0.51676182 |
| chr11 | 24476279 | 24522092 | 45814  | 2  | 2 | 1 | 0.1575501  | 0.01091641 | 2 | 4 | 0.1575501  | 0.76005302 |
| chr11 | 24522092 | 24671685 | 149594 | 3  | 2 | 0 | 0.1575501  | 0          | 2 | 4 | 0.1575501  | 1.26272838 |
| chr11 | 24671685 | 24847837 | 176153 | 4  | 2 | 0 | 0.1575501  | 0          | 2 | 3 | 0.1575501  | 0.93173516 |
| chr11 | 24847837 | 25069132 | 221296 | 5  | 2 | 0 | 0.30102999 | 0          | 3 | 3 | 0.05404976 | 0.93173516 |
| chr11 | 25069132 | 25069191 | 60     | 1  | 2 | 0 | 0.30102999 | 0          | 4 | 4 | 0.05404976 | 1.26272838 |
| chr11 | 25069191 | 25129984 | 60794  | 1  | 2 | 0 | 0.30102999 | 0          | 3 | 3 | 0.05404976 | 0.93173516 |
| chr11 | 25129984 | 25380076 | 250093 | 1  | 1 | 0 | 0.1218695  | 0          | 1 | 3 | 0.1218695  | 0.93173516 |
| chr11 | 25380076 | 25552296 | 172221 | 1  | 0 | 0 | 0.1218695  | 0          | 2 | 2 | 0.1218695  | 0.61140001 |
| chr11 | 25552296 | 25677598 | 125303 | 1  | 1 | 0 | 0.1218695  | 0          | 1 | 1 | 0.1218695  | 0.30102999 |
| chr11 | 25677598 | 25887995 | 210398 | 2  | 1 | 1 | 0.1218695  | 0.1218695  | 1 | 1 | 0.1218695  | 0.1218695  |
| chr11 | 25887995 | 25888054 | 60     | 1  | 2 | 1 | 0.1218695  | 0.0429175  | 1 | 4 | 0.1218695  | 0.47744371 |
| chr11 | 25888054 | 26118285 | 230232 | 1  | 1 | 1 | 0.1218695  | 0.02438896 | 1 | 3 | 0.1218695  | 0.51676182 |
| chr11 | 26118285 | 26118344 | 60     | 1  | 1 | 0 | 0.1218695  | 0.08289318 | 1 | 3 | 0.1218695  | 0.30102999 |
| chr11 | 26118344 | 26388841 | 170498 | 1  | 2 | 0 | 0.1218695  | 0          | 1 | 3 | 0.1218695  | 0.93173516 |
| chr11 | 26388841 | 26390509 | 101669 | 3  | 3 | 0 | 0.05404976 | 0          | 2 | 3 | 0.30102999 | 0.93173516 |
| chr11 | 26390509 | 26484665 | 94157  | 3  | 1 | 4 | 0.1575501  | 0.18734596 | 2 | 4 | 0.1575501  | 0.18734596 |
| chr11 | 26484665 | 26556063 | 71399  | 1  | 3 | 2 | 0.1575501  | 0.17593012 | 2 | 3 | 0.1575501  | 0.17593012 |
| chr11 | 26556063 | 26583144 | 27082  | 2  | 2 | 3 | 0.1575501  | 0.10122019 | 2 | 4 | 0.1575501  | 0.30102999 |
| chr11 | 26583144 | 26621222 | 38079  | 2  | 2 | 2 | 0.1575501  | 0.0429175  | 2 | 2 | 0.1575501  | 0.47744371 |
| chr11 | 26621222 | 26720962 | 99741  | 2  | 2 | 2 | 0.1575501  | 0.08289318 | 2 | 3 | 0.1575501  | 0.30102999 |
| chr11 | 26720962 | 26834415 | 113454 | 4  | 2 | 2 | 0.1575501  | 0.0429175  | 2 | 4 | 0.1575501  | 0.47744371 |
| chr11 | 26834415 | 27077147 | 242733 | 2  | 2 | 2 | 0.1575501  | 0.01091641 | 2 | 4 | 0.1575501  | 0.76005302 |
| chr11 | 27077147 | 27077206 | 60     | 1  | 3 | 3 | 0.30102999 | 0.10122019 | 2 | 4 | 0.08289318 | 0.08289318 |
| chr11 | 27077206 | 27129357 | 52152  | 1  | 3 | 2 | 0.30102999 | 0.0429175  | 2 | 4 | 0.08289318 | 0.47744371 |
| chr11 | 27129357 | 27149226 | 19870  | 2  | 4 | 2 | 0.18734596 | 0.0429175  | 4 | 4 | 0.18734596 | 0.47744371 |
| chr11 | 27149226 | 27265676 | 377351 | 12 | 4 | 2 | 0.30102999 | 0.0429175  | 3 | 4 | 0.10122019 | 0.47744371 |
| chr11 | 27265676 | 28104454 | 577879 | 11 | 4 | 4 | 0.30102999 | 0.01091641 | 3 | 4 | 0.10122019 | 0.76005302 |
| chr11 | 28104454 | 28131157 | 26704  | 1  | 3 | 1 | 0.17593012 | 0.02438896 | 3 | 3 | 0.17593012 | 0.51676182 |
| chr11 | 28131157 | 28154111 | 22955  | 1  | 3 | 1 | 0.17593012 | 0.05404976 | 3 | 2 | 0.17593012 | 0.30102999 |
| chr11 | 28154111 | 28154170 | 60     | 1  | 4 | 1 | 0.30102999 | 0.05404976 | 3 | 2 | 0.10122019 | 0.30102999 |
| chr11 | 28154170 | 28197596 | 43427  | 1  | 3 | 1 | 0.30102999 | 0.05404976 | 2 | 2 | 0.08289318 | 0.30102999 |
| chr11 | 28197596 | 28197655 | 60     | 1  | 3 | 1 | 0.30102999 | 0.02438896 | 2 | 3 | 0.08289318 | 0.51676182 |
| chr11 | 28197655 | 28254297 | 56643  | 1  | 3 | 1 | 0.30102999 | 0.05404976 | 2 | 2 | 0.08289318 | 0.30102999 |
| chr11 | 28254297 | 28291889 | 37593  | 2  | 4 | 1 | 0.47744371 | 0.05404976 | 2 | 4 | 0.0429175  | 0.30102999 |
| chr11 | 28291889 | 28349712 | 57824  | 3  | 4 | 2 | 0.47744371 | 0.02438896 | 2 | 3 | 0.0429175  | 0.51676182 |
| chr11 | 28349712 | 28464405 | 114694 | 1  | 3 | 1 | 0.51676182 | 0.02438896 | 3 | 3 | 0.02438896 | 0.51676182 |
| chr11 | 28464405 | 28728052 | 263648 | 1  | 3 | 1 | 0.51676182 | 0.1218695  | 1 | 1 | 0.1218695  | 0.1218695  |
| chr11 | 28728052 | 28728111 | 60     | 1  | 4 | 1 | 0.76005302 | 0.05404976 | 1 | 2 | 0.01091641 | 0.30102999 |
| chr11 | 28728111 | 29062145 | 334035 | 2  | 4 |   |            |            |   |   |            |            |

|       |          |          |        |    |   |   |            |            |   |   |            |            |
|-------|----------|----------|--------|----|---|---|------------|------------|---|---|------------|------------|
| chr11 | 31926025 | 32182723 | 256699 | 3  | 2 | 1 | 0.01053319 | 0.00478973 | 6 | 5 | 0.91219088 | 1.02643191 |
| chr11 | 32182723 | 32182782 | 60     | 1  | 4 | 1 | 0.06713722 | 0.00478973 | 6 | 5 | 0.44141547 | 1.02643191 |
| chr11 | 32182782 | 32439154 | 256373 | 3  | 3 | 1 | 0.03070643 | 0.00478973 | 6 | 5 | 0.63695542 | 1.02643191 |
| chr11 | 32439154 | 32562898 | 123745 | 2  | 3 | 1 | 0.03070643 | 0.01091641 | 6 | 4 | 0.63695542 | 0.76005302 |
| chr11 | 32562898 | 33331503 | 768606 | 25 | 3 | 1 | 0.03070643 | 0.00478973 | 6 | 5 | 0.63695542 | 1.02643191 |
| chr11 | 33331503 | 33488703 | 157201 | 4  | 3 | 2 | 0.03070643 | 0.02162467 | 6 | 5 | 0.63695542 | 0.68214471 |
| chr11 | 33488703 | 33730524 | 241822 | 6  | 3 | 2 | 0.01598258 | 0.02162467 | 7 | 5 | 0.84395715 | 0.68214471 |
| chr11 | 33730524 | 33880305 | 149782 | 5  | 3 | 2 | 0.03070643 | 0.02162467 | 6 | 5 | 0.63695542 | 0.68214471 |
| chr11 | 33880305 | 33952093 | 71789  | 2  | 3 | 2 | 0.01598258 | 0.02162467 | 7 | 5 | 0.84395715 | 0.68214471 |
| chr11 | 33952093 | 33952152 | 60     | 1  | 3 | 2 | 0.0079614  | 0.02162467 | 8 | 5 | 1.07548421 | 0.68214471 |
| chr11 | 33952152 | 34072303 | 120152 | 1  | 3 | 2 | 0.03070643 | 0.02162467 | 6 | 5 | 0.63695542 | 0.68214471 |
| chr11 | 34072303 | 34098149 | 25847  | 2  | 4 | 2 | 0.06713722 | 0.02162467 | 6 | 5 | 0.44141547 | 0.68214471 |
| chr11 | 34098149 | 34292369 | 194221 | 4  | 4 | 1 | 0.03070643 | 0.00478973 | 6 | 5 | 0.63695542 | 1.02643191 |
| chr11 | 34292369 | 34292428 | 60     | 1  | 4 | 1 | 0.03812622 | 0.00478973 | 7 | 5 | 0.60763643 | 1.02643191 |
| chr11 | 34292428 | 34350648 | 58221  | 2  | 4 | 1 | 0.06713722 | 0.00478973 | 6 | 5 | 0.44141547 | 1.02643191 |
| chr11 | 34350648 | 34386314 | 35667  | 2  | 4 | 1 | 0.03812622 | 0.00478973 | 7 | 5 | 0.60763643 | 1.02643191 |
| chr11 | 34386314 | 34530961 | 144648 | 5  | 4 | 1 | 0.06713722 | 0.00478973 | 6 | 5 | 0.44141547 | 1.02643191 |
| chr11 | 34530961 | 34651737 | 120777 | 1  | 3 | 1 | 0.03070643 | 0.00478973 | 6 | 5 | 0.63695542 | 1.02643191 |
| chr11 | 34651737 | 34764178 | 112442 | 4  | 4 | 1 | 0.06713722 | 0.00478973 | 6 | 5 | 0.44141547 | 1.02643191 |
| chr11 | 34764178 | 34764237 | 60     | 1  | 5 | 1 | 0.12309572 | 0.00478973 | 6 | 4 | 0.30102999 | 1.02643191 |
| chr11 | 34764237 | 34903851 | 139615 | 1  | 5 | 1 | 0.12309572 | 0.01091641 | 6 | 4 | 0.30102999 | 0.76005302 |
| chr11 | 34903851 | 34933576 | 29726  | 2  | 4 | 1 | 0.07511598 | 0.01091641 | 7 | 4 | 0.43181735 | 0.76005302 |
| chr11 | 34933576 | 34951163 | 17588  | 1  | 4 | 1 | 0.03812622 | 0.01091641 | 7 | 4 | 0.60763643 | 0.76005302 |
| chr11 | 34951163 | 34988333 | 37171  | 1  | 4 | 0 | 0.03812622 | 0.00478973 | 7 | 4 | 0.60763643 | 1.26272838 |
| chr11 | 34988333 | 35016838 | 28506  | 3  | 5 | 0 | 0.07511598 | 0.00478973 | 7 | 4 | 0.43181735 | 1.26272838 |
| chr11 | 35016838 | 35060987 | 44150  | 2  | 0 | 0 | 0.04407051 | 0.00478973 | 8 | 4 | 0.58747051 | 1.26272838 |
| chr11 | 35060987 | 35198117 | 137131 | 2  | 3 | 0 | 0.0079614  | 0.00478973 | 8 | 3 | 1.07548421 | 0.93173516 |
| chr11 | 35198117 | 35276999 | 78883  | 6  | 3 | 0 | 0.0079614  | 0.00478973 | 8 | 4 | 1.07548421 | 1.26272838 |
| chr11 | 35276999 | 35380848 | 103850 | 2  | 3 | 0 | 0.0079614  | 0.00478973 | 8 | 3 | 1.07548421 | 0.93173516 |
| chr11 | 35380848 | 35453639 | 72792  | 3  | 3 | 0 | 0.01598258 | 0.00478973 | 7 | 3 | 0.84395715 | 0.93173516 |
| chr11 | 35453639 | 35474376 | 20738  | 2  | 3 | 0 | 0.0079614  | 0.00478973 | 8 | 4 | 1.07548421 | 1.26272838 |
| chr11 | 35474376 | 35492366 | 17991  | 1  | 3 | 0 | 0.0079614  | 0.00478973 | 8 | 3 | 1.07548421 | 0.93173516 |
| chr11 | 35492366 | 35535716 | 43351  | 1  | 3 | 0 | 0.01598258 | 0.00478973 | 7 | 3 | 0.84395715 | 0.93173516 |
| chr11 | 35535716 | 35685126 | 149411 | 3  | 0 | 0 | 0.01598258 | 0.00478973 | 7 | 4 | 0.84395715 | 1.26272838 |
| chr11 | 35685126 | 35960609 | 275484 | 8  | 4 | 0 | 0.03812622 | 0.00478973 | 7 | 4 | 0.60763643 | 1.26272838 |
| chr11 | 35960609 | 36008617 | 48009  | 1  | 4 | 0 | 0.03812622 | 0.00478973 | 7 | 3 | 0.60763643 | 0.93173516 |
| chr11 | 36008617 | 36008676 | 60     | 1  | 4 | 1 | 0.03812622 | 0.02438896 | 7 | 3 | 0.60763643 | 0.51676182 |
| chr11 | 36008676 | 36084793 | 76118  | 1  | 4 | 0 | 0.03812622 | 0.00478973 | 7 | 3 | 0.60763643 | 0.93173516 |
| chr11 | 36084793 | 36084852 | 60     | 1  | 4 | 0 | 0.03812622 | 0.00478973 | 7 | 4 | 0.60763643 | 1.26272838 |
| chr11 | 36084852 | 36200233 | 115382 | 2  | 4 | 0 | 0.06713722 | 0.00478973 | 6 | 3 | 0.44141547 | 0.93173516 |
| chr11 | 36200233 | 36200292 | 60     | 1  | 5 | 0 | 0.12309572 | 0.00478973 | 6 | 3 | 0.30102999 | 0.93173516 |
| chr11 | 36200292 | 36309570 | 109279 | 2  | 5 | 0 | 0.19510895 | 0.00478973 | 5 | 3 | 0.19510895 | 0.93173516 |
| chr11 | 36309570 | 36420877 | 111308 | 3  | 4 | 0 | 0.11390336 | 0.00478973 | 5 | 3 | 0.30102999 | 0.93173516 |
| chr11 | 36420877 | 36445235 | 24359  | 1  | 3 | 0 | 0.05670724 | 0.00478973 | 5 | 3 | 0.45545077 | 0.93173516 |
| chr11 | 36445235 | 36472190 | 26956  | 1  | 3 | 0 | 0.05670724 | 0.00478973 | 5 | 1 | 0.45545077 | 0.30102999 |
| chr11 | 36472190 | 36537037 | 64848  | 2  | 2 | 0 | 0.02162467 | 0.00478973 | 5 | 1 | 0.68214471 | 0.30102999 |
| chr11 | 36537037 | 36614666 | 77630  | 4  | 3 | 0 | 0.05670724 | 0.00478973 | 5 | 2 | 0.45545077 | 0.61140001 |
| chr11 | 36614666 | 36680598 | 65933  | 2  | 3 | 0 | 0.05670724 | 0.00478973 | 5 | 1 | 0.45545077 | 0.30102999 |
| chr11 | 36680598 | 36801306 | 120709 | 1  | 1 | 0 | 0.00478973 | 0.00478973 | 5 | 1 | 1.02643191 | 0.30102999 |
| chr11 | 36801306 | 36973982 | 172677 | 1  | 1 | 0 | 0.02438896 | 0.00478973 | 3 | 1 | 0.51676182 | 0.30102999 |
| chr11 | 36973982 | 37126229 | 152248 | 1  | 1 | 0 | 0.05404976 | 0.00478973 | 2 | 1 | 0.30102999 | 0.30102999 |
| chr11 | 37126229 | 37305602 | 179374 | 2  | 1 | 0 | 0.05404976 | 0.00478973 | 2 | 2 | 0.30102999 | 0.61140001 |
| chr11 | 37305602 | 37305661 | 60     | 1  | 2 | 0 | 0.08289318 | 0.00478973 | 3 | 2 | 0.30102999 | 0.61140001 |
| chr11 | 37305661 | 37442379 | 136719 | 1  | 1 | 0 | 0.02438896 | 0.00478973 | 3 | 2 | 0.51676182 | 0.61140001 |
| chr11 | 37442379 | 37442438 | 60     | 1  | 1 | 0 | 0.01091641 | 0.00478973 | 4 | 2 | 0.76005302 | 0.61140001 |
| chr11 | 38868079 | 38868138 | 60     | 1  | 0 | 0 | 0.00478973 | 0.00478973 | 0 | 2 | 0.00478973 | 0.61140001 |
| chr11 | 39233962 | 39528105 | 294144 | 3  | 0 | 0 | 0.00478973 | 0.00478973 | 0 | 2 | 0.00478973 | 0.61140001 |
| chr11 | 39528105 | 39979653 | 451549 | 4  | 1 | 0 | 0.1218695  | 0.00478973 | 1 | 2 | 0.1218695  | 0.61140001 |
| chr11 | 39979653 | 39979712 | 60     | 1  | 2 | 0 | 0.1575501  | 0.00478973 | 2 | 3 | 0.1575501  | 0.93173516 |
| chr11 | 39979712 | 40149246 | 169535 | 2  | 0 | 0 | 0.1575501  | 0.00478973 | 2 | 2 | 0.1575501  | 0.61140001 |
| chr11 | 40149246 | 40339615 | 190370 | 4  | 2 | 1 | 0.1575501  | 0.05404976 | 2 | 2 | 0.1575501  | 0.30102999 |
| chr11 | 40339615 | 40428726 | 89112  | 2  | 2 | 1 | 0.1575501  | 0.02438896 | 2 | 2 | 0.1575501  | 0.51676182 |
| chr11 | 40428726 | 40694847 | 266122 | 2  | 2 | 2 | 0.1575501  | 0.08289318 | 2 | 3 | 0.1575501  | 0.30102999 |
| chr11 | 40694847 | 40859806 | 164960 | 4  | 2 | 1 | 0.1575501  | 0.02438896 | 2 | 3 | 0.1575501  | 0.51676182 |
| chr11 | 40859806 | 41094392 | 234587 | 6  | 2 | 2 | 0.1575501  | 0.08289318 | 2 | 3 | 0.1575501  | 0.30102999 |
| chr11 | 41094392 | 41385521 | 291130 | 5  | 2 | 1 | 0.1575501  | 0.02438896 | 2 | 3 | 0.1575501  | 0.51676182 |
| chr11 | 41385521 | 41943259 | 558339 | 4  | 1 | 1 | 0.05404976 | 0.02438896 | 2 | 3 | 0.30102999 | 0.51676182 |
| chr11 | 41943259 | 41944418 | 60     | 1  | 1 | 1 | 0.05404976 | 0.01091641 | 2 | 2 | 0.30102999 | 0.76005302 |
| chr11 | 41944418 | 42226159 | 281742 | 2  | 0 | 0 | 0.05404976 | 0.00478973 | 0 | 1 | 0.30102999 | 0.00478973 |
| chr11 | 42226159 | 42226218 | 60     | 1  | 1 | 0 | 0.1218695  | 0.00478973 | 1 | 1 | 0.1218695  | 0.30102999 |
| chr11 | 42226218 | 42648087 | 421870 | 1  | 0 | 0 | 0.1218695  | 0.00478973 | 1 | 0 | 0.1218695  | 0.00478973 |
| chr11 | 42648087 | 42648146 | 60     | 1  | 2 | 1 | 0.30102999 | 0.02438896 | 1 | 1 | 0.05404976 | 0.51676182 |
| chr11 | 42648146 | 42916891 | 268746 | 1  | 2 | 1 | 0.30102999 | 0.1218695  | 1 | 1 | 0.05404976 | 0.1218695  |
| chr11 | 42916891 | 42916950 | 60     | 1  | 2 | 1 | 0.30102999 | 0.05404976 | 1 | 1 | 0.05404976 | 0.30102999 |
| chr11 | 42916950 | 43115284 | 198335 | 1  | 2 | 1 | 0.30102999 | 0.1218695  | 1 | 1 | 0.05404976 | 0.1218695  |
| chr11 | 43115284 | 43275890 | 160607 | 2  | 2 | 1 | 0.1575501  | 0.05404976 | 2 | 2 | 0.1575501  | 0.30102999 |
| chr11 | 43275890 | 43428874 | 152985 | 3  | 2 | 1 | 0.08289318 | 0.05404976 | 3 | 2 | 0.30102999 | 0.30102999 |
| chr11 | 43428874 | 43448401 | 195228 | 2  | 2 | 1 | 0.0429175  | 0.05404976 | 4 | 2 | 0.47744371 | 0.30102999 |
| chr11 | 43448401 | 43619551 | 171151 | 6  | 2 | 1 | 0.08289318 | 0.05404976 | 2 | 2 | 0.30102999 | 0.30102999 |
| chr11 | 43619551 | 43904698 | 285148 | 8  | 2 | 1 | 0.0429175  | 0.05404976 | 2 | 2 | 0.47744371 | 0.30102999 |
| chr11 | 43904698 | 44088886 | 184189 | 5  | 4 | 1 | 0.18734596 | 0.05404976 | 4 | 2 | 0.18734596 | 0.30102999 |
| chr11 | 44088886 | 44282436 | 193551 | 7  | 4 | 1 | 0.18734596 | 0.02438896 | 4 | 3 | 0.18734596 | 0.51676182 |
| chr11 | 44282436 | 44305648 | 23213  | 2  | 4 | 1 | 0.11390336 | 0.02438896 | 5 | 3 | 0.30102999 | 0.51676182 |
| chr11 | 44305648 | 44305707 | 60     | 1  | 5 | 1 | 0.19510895 | 0.02438896 | 5 | 3 | 0.19510895 | 0.51676182 |
| chr11 | 44305707 | 44452984 | 147278 | 2  | 4 | 1 | 0.11390336 | 0.02438896 | 5 | 3 | 0.30102999 | 0.51676182 |
| chr11 | 44452984 | 44596757 | 143774 | 2  | 5 | 1 | 0.19510895 | 0.02438896 | 5 | 3 | 0.19510895 | 0.51676182 |
| chr11 | 44596757 | 44606275 | 9519   | 2  | 5 | 1 | 0.12309572 | 0.02438896 | 6 | 3 | 0.30102999 | 0.51676182 |
| chr11 | 44606275 | 44770056 | 163782 | 3  | 4 | 1 | 0.11390336 | 0.02438896 | 5 | 3 | 0.30102999 | 0.51676182 |
| chr11 | 44770056 | 44903476 | 133421 | 2  | 4 | 1 | 0.18734596 | 0.02438896 | 4 | 4 | 0.18734596 | 0.51676182 |
| chr11 |          |          |        |    |   |   |            |            |   |   |            |            |

|       |          |          |        |    |   |   |   |            |            |   |            |            |            |
|-------|----------|----------|--------|----|---|---|---|------------|------------|---|------------|------------|------------|
| chr11 | 47841088 | 48032749 | 191662 | 3  | 0 | 3 | 0 | 0.03070643 | 2          | 6 | 0.61140001 | 0.63695542 |            |
| chr11 | 48032749 | 48342701 | 309953 | 7  | 0 | 2 | 0 | 0.01053319 | 2          | 6 | 0.61140001 | 0.91219088 |            |
| chr11 | 48342701 | 48466903 | 124203 | 2  | 0 | 1 | 0 | 0.00478973 | 2          | 5 | 0.61140001 | 1.02643191 |            |
| chr11 | 48466903 | 48588884 | 121982 | 1  | 0 | 1 | 0 | 0.02438896 | 2          | 3 | 0.61140001 | 0.51676182 |            |
| chr11 | 48588884 | 48588943 | 60     | 1  | 0 | 1 | 0 | 0.01091641 | 2          | 4 | 0.61140001 | 0.76005302 |            |
| chr11 | 48588943 | 49532643 | 943701 | 6  | 0 | 0 | 0 | 0          | 0          | 1 | 0          | 0.30102999 |            |
| chr11 | 55375127 | 55375186 | 60     | 1  | 0 | 0 | 0 | 0          | 1          | 0 | 0.30102999 | 0          |            |
| chr11 | 55481624 | 55481683 | 60     | 1  | 0 | 0 | 0 | 0          | 2          | 1 | 0.61140001 | 0.30102999 |            |
| chr11 | 55481683 | 55622470 | 140788 | 2  | 0 | 0 | 0 | 0          | 2          | 0 | 0.61140001 | 0          |            |
| chr11 | 55622470 | 55622529 | 60     | 1  | 0 | 1 | 0 | 0.30102999 | 2          | 0 | 0.61140001 | 0          |            |
| chr11 | 55622529 | 55663362 | 40834  | 1  | 0 | 0 | 0 | 0          | 2          | 0 | 0.61140001 | 0          |            |
| chr11 | 55663362 | 55753062 | 89701  | 3  | 0 | 0 | 0 | 0          | 2          | 1 | 0.61140001 | 0.30102999 |            |
| chr11 | 55753062 | 55816312 | 63251  | 2  | 0 | 0 | 0 | 0          | 2          | 2 | 0.61140001 | 0.61140001 |            |
| chr11 | 55816312 | 55980347 | 164036 | 3  | 0 | 0 | 0 | 0          | 2          | 1 | 0.61140001 | 0.30102999 |            |
| chr11 | 55980347 | 56052089 | 71743  | 2  | 0 | 0 | 0 | 0          | 3          | 1 | 0.93173516 | 0.30102999 |            |
| chr11 | 56052089 | 56124601 | 72513  | 2  | 0 | 0 | 0 | 0          | 3          | 2 | 0.93173516 | 0.61140001 |            |
| chr11 | 56124601 | 56188940 | 64340  | 1  | 0 | 0 | 0 | 0          | 2          | 2 | 0.61140001 | 0.61140001 |            |
| chr11 | 56188940 | 56252050 | 63111  | 2  | 0 | 0 | 0 | 0          | 2          | 3 | 0.61140001 | 0.93173516 |            |
| chr11 | 56252050 | 56313831 | 61782  | 1  | 0 | 0 | 0 | 0          | 2          | 2 | 0.61140001 | 0.61140001 |            |
| chr11 | 56313831 | 56342108 | 28278  | 2  | 0 | 0 | 0 | 0          | 2          | 2 | 0.61140001 | 0.93173516 |            |
| chr11 | 56342108 | 56342167 | 60     | 1  | 0 | 0 | 0 | 0          | 3          | 3 | 0.93173516 | 0.93173516 |            |
| chr11 | 56342167 | 56394889 | 52723  | 1  | 0 | 0 | 0 | 0          | 2          | 2 | 0.61140001 | 0.61140001 |            |
| chr11 | 56394889 | 56461267 | 66379  | 2  | 0 | 0 | 0 | 0          | 3          | 2 | 0.93173516 | 0.61140001 |            |
| chr11 | 56461267 | 56610344 | 149078 | 3  | 0 | 0 | 0 | 0          | 3          | 3 | 0.93173516 | 0.93173516 |            |
| chr11 | 56610344 | 56610403 | 60     | 1  | 0 | 1 | 0 | 0.02438896 | 6          | 3 | 1.95986592 | 0.51676182 |            |
| chr11 | 56610403 | 56649983 | 39581  | 1  | 0 | 1 | 0 | 0.02438896 | 3          | 3 | 0.93173516 | 0.51676182 |            |
| chr11 | 56649983 | 56692526 | 42544  | 1  | 0 | 0 | 0 | 0          | 3          | 3 | 0.93173516 | 0.93173516 |            |
| chr11 | 56692526 | 56746498 | 53973  | 2  | 0 | 0 | 0 | 0          | 3          | 3 | 1.95986592 | 0.93173516 |            |
| chr11 | 56746498 | 56746557 | 60     | 1  | 0 | 1 | 0 | 0.02438896 | 6          | 3 | 1.95986592 | 0.51676182 |            |
| chr11 | 56746557 | 56872403 | 125847 | 1  | 0 | 0 | 0 | 0          | 4          | 3 | 1.26272838 | 0.93173516 |            |
| chr11 | 56872403 | 56975589 | 103187 | 2  | 0 | 0 | 0 | 0          | 4          | 5 | 1.26272838 | 1.60515106 |            |
| chr11 | 56975589 | 57002518 | 26930  | 5  | 0 | 2 | 0 | 0.02162467 | 4          | 5 | 1.26272838 | 0.68214471 |            |
| chr11 | 57002518 | 57002574 | 57     | 1  | 0 | 2 | 0 | 0.02162467 | 5          | 5 | 1.60515106 | 0.68214471 |            |
| chr11 | 57002574 | 57093520 | 90947  | 2  | 0 | 1 | 0 | 0.00478973 | 4          | 5 | 1.26272838 | 1.02643191 |            |
| chr11 | 57093520 | 57144214 | 50695  | 2  | 0 | 0 | 0 | 0          | 3          | 5 | 0.93173516 | 1.60515106 |            |
| chr11 | 57144214 | 57175444 | 31231  | 5  | 0 | 1 | 0 | 0.00478973 | 5          | 5 | 1.60515106 | 1.02643191 |            |
| chr11 | 57175444 | 57238918 | 63475  | 2  | 0 | 0 | 0 | 0          | 3          | 5 | 0.93173516 | 1.60515106 |            |
| chr11 | 57238918 | 57238965 | 48     | 1  | 0 | 0 | 0 | 0          | 4          | 5 | 1.26272838 | 1.60515106 |            |
| chr11 | 57238965 | 5727481  | 88517  | 3  | 0 | 0 | 0 | 0          | 3          | 5 | 0.93173516 | 1.60515106 |            |
| chr11 | 5727481  | 57327540 | 60     | 1  | 0 | 2 | 0 | 0.02162467 | 3          | 5 | 0.93173516 | 0.68214471 |            |
| chr11 | 57327540 | 57468357 | 140818 | 5  | 0 | 1 | 0 | 0.00478973 | 3          | 5 | 0.93173516 | 1.02643191 |            |
| chr11 | 57468357 | 57529533 | 61177  | 5  | 0 | 2 | 0 | 0.02162467 | 3          | 5 | 0.93173516 | 0.68214471 |            |
| chr11 | 57529533 | 57574289 | 44757  | 2  | 0 | 0 | 0 | 0          | 3          | 5 | 0.93173516 | 1.60515106 |            |
| chr11 | 57574289 | 57574348 | 60     | 1  | 0 | 2 | 0 | 0.02162467 | 4          | 5 | 1.26272838 | 0.68214471 |            |
| chr11 | 57574348 | 57668293 | 93946  | 1  | 0 | 0 | 0 | 0          | 4          | 5 | 1.26272838 | 1.60515106 |            |
| chr11 | 57668293 | 57788307 | 120015 | 1  | 0 | 0 | 0 | 0          | 4          | 4 | 1.26272838 | 1.26272838 |            |
| chr11 | 57788307 | 57944568 | 156262 | 4  | 0 | 0 | 0 | 0          | 5          | 4 | 1.60515106 | 1.26272838 |            |
| chr11 | 57944568 | 57944627 | 60     | 1  | 0 | 0 | 0 | 0          | 7          | 4 | 2.3278427  | 1.26272838 |            |
| chr11 | 57944627 | 57984274 | 39648  | 1  | 0 | 0 | 0 | 0          | 7          | 3 | 2.3278427  | 0.93173516 |            |
| chr11 | 57984274 | 58035563 | 51290  | 1  | 0 | 0 | 0 | 0          | 6          | 3 | 1.95986592 | 0.93173516 |            |
| chr11 | 58035563 | 58130496 | 94934  | 1  | 0 | 0 | 0 | 0          | 5          | 3 | 1.60515106 | 0.93173516 |            |
| chr11 | 58130496 | 58201966 | 71471  | 1  | 0 | 0 | 0 | 0          | 5          | 2 | 1.60515106 | 0.61140001 |            |
| chr11 | 58201966 | 58202025 | 60     | 1  | 1 | 0 | 0 | 0.00204627 | 6          | 2 | 1.31360226 | 0.61140001 |            |
| chr11 | 58202025 | 58312165 | 110141 | 2  | 1 | 0 | 0 | 0.01091641 | 4          | 2 | 0.76005302 | 0.61140001 |            |
| chr11 | 58312165 | 58362869 | 50705  | 3  | 1 | 0 | 0 | 0.00478973 | 5          | 2 | 1.02643191 | 0.61140001 |            |
| chr11 | 58362869 | 58392828 | 29960  | 2  | 1 | 0 | 0 | 0.00204627 | 6          | 2 | 1.31360226 | 0.61140001 |            |
| chr11 | 58392828 | 58480268 | 87441  | 1  | 0 | 0 | 0 | 0          | 4          | 2 | 1.26272838 | 0.61140001 |            |
| chr11 | 58480268 | 58891154 | 410887 | 8  | 0 | 0 | 0 | 0          | 3          | 2 | 0.93173516 | 0.61140001 |            |
| chr11 | 58891154 | 58967316 | 76163  | 4  | 0 | 0 | 0 | 0          | 4          | 2 | 1.26272838 | 0.61140001 |            |
| chr11 | 58967316 | 59163305 | 195990 | 3  | 0 | 0 | 0 | 0          | 3          | 2 | 0.93173516 | 0.61140001 |            |
| chr11 | 59163305 | 59295250 | 131946 | 3  | 0 | 0 | 0 | 0          | 3          | 3 | 0.93173516 | 0.93173516 |            |
| chr11 | 59295250 | 59295309 | 60     | 1  | 0 | 1 | 0 | 0.02438896 | 3          | 3 | 0.93173516 | 0.51676182 |            |
| chr11 | 59295309 | 59343075 | 47767  | 1  | 0 | 1 | 0 | 0.02438896 | 2          | 3 | 0.61140001 | 0.51676182 |            |
| chr11 | 59343075 | 59369293 | 26219  | 3  | 0 | 2 | 0 | 0.0429175  | 2          | 4 | 0.61140001 | 0.47744371 |            |
| chr11 | 59369293 | 59496171 | 126879 | 4  | 0 | 1 | 0 | 0.01091641 | 4          | 4 | 0.61140001 | 0.76005302 |            |
| chr11 | 59496171 | 59496230 | 60     | 1  | 1 | 0 | 0 | 0.05404976 | 2          | 4 | 0.30102999 | 0.76005302 |            |
| chr11 | 59496230 | 59541531 | 45383  | 1  | 0 | 1 | 0 | 0.01091641 | 2          | 4 | 0.61140001 | 0.76005302 |            |
| chr11 | 59541531 | 59569319 | 27788  | 1  | 0 | 1 | 0 | 0.01091641 | 1          | 4 | 0.30102999 | 0.76005302 |            |
| chr11 | 59569319 | 59569378 | 60     | 1  | 0 | 2 | 0 | 0.0429175  | 1          | 4 | 0.30102999 | 0.47744371 |            |
| chr11 | 59569378 | 59611911 | 42534  | 2  | 0 | 1 | 0 | 0.01091641 | 1          | 4 | 0.30102999 | 0.76005302 |            |
| chr11 | 59611911 | 59626700 | 14790  | 2  | 0 | 2 | 0 | 0.0429175  | 1          | 4 | 0.30102999 | 0.47744371 |            |
| chr11 | 59626700 | 59679690 | 52991  | 1  | 0 | 2 | 0 | 0.08289318 | 1          | 3 | 0.30102999 | 0.30102999 |            |
| chr11 | 59679690 | 59739027 | 59328  | 1  | 0 | 2 | 0 | 0.08289318 | 0          | 3 | 0          | 0.30102999 |            |
| chr11 | 59739027 | 59913096 | 174070 | 5  | 0 | 2 | 0 | 0.0429175  | 0          | 4 | 0          | 0.47744371 |            |
| chr11 | 59913096 | 60043784 | 130689 | 4  | 1 | 2 | 0 | 0.1218695  | 0.0429175  | 1 | 4          | 0.1218695  | 0.47744371 |
| chr11 | 60043784 | 60108734 | 64951  | 1  | 1 | 2 | 0 | 0.1218695  | 0.08289318 | 1 | 3          | 0.1218695  | 0.30102999 |
| chr11 | 60108734 | 60355993 | 247260 | 8  | 0 | 2 | 0 | 0.08289318 | 3          | 3 | 0.30102999 | 0.30102999 |            |
| chr11 | 60355993 | 60356052 | 60     | 1  | 0 | 2 | 0 | 0.0429175  | 1          | 4 | 0.30102999 | 0.47744371 |            |
| chr11 | 60356052 | 60416190 | 60139  | 2  | 0 | 2 | 0 | 0.08289318 | 1          | 3 | 0.30102999 | 0.30102999 |            |
| chr11 | 60416190 | 60454540 | 38351  | 2  | 0 | 2 | 0 | 0.0429175  | 2          | 4 | 0.61140001 | 0.47744371 |            |
| chr11 | 60454540 | 60614447 | 159908 | 5  | 1 | 2 | 0 | 0.05404976 | 0.0429175  | 2 | 4          | 0.30102999 | 0.47744371 |
| chr11 | 60614447 | 60942446 | 328000 | 14 | 1 | 2 | 0 | 0.02438896 | 0.0429175  | 3 | 4          | 0.51676182 | 0.47744371 |
| chr11 | 60942446 | 60942505 | 60     | 1  | 2 | 2 | 0 | 0.08289318 | 0.0429175  | 3 | 4          | 0.30102999 | 0.47744371 |
| chr11 | 60942505 | 61049008 | 106504 | 2  | 1 | 2 | 0 | 0.02438896 | 0.0429175  | 3 | 4          | 0.51676182 | 0.47744371 |
| chr11 | 61049008 | 61090525 | 41518  | 3  | 2 | 2 | 0 | 0.08289318 | 0.0429175  | 3 | 4          | 0.30102999 | 0.47744371 |
| chr11 | 61090525 | 61113696 | 23172  | 5  | 3 | 2 | 0 | 0.17593012 | 0.0429175  | 3 | 4          | 0.17593012 | 0.47744371 |
| chr11 | 61113696 | 61124898 | 11203  | 1  | 2 | 2 | 0 | 0.08289318 | 0.0429175  | 3 | 4          | 0.30102999 | 0.47744371 |
| chr11 | 61124898 | 61136645 | 11748  | 3  | 3 | 3 | 0 | 0.17593012 | 0.10122019 | 3 | 4          | 0.17593012 | 0.30102999 |
| chr11 | 61136645 | 61161394 | 24750  | 1  | 3 | 2 | 0 | 0.17593012 | 0.0429175  | 3 | 4          | 0.17593012 | 0.47744371 |
| chr11 | 61161394 | 61161448 | 55     | 1  | 4 | 2 | 0 | 0.30102999 | 0.0429175  | 3 | 4          | 0.10122019 | 0.47744371 |
| chr11 | 61161448 | 61170164 | 8717   | 1  | 4 | 2 | 0 | 0.30102999 | 0.08289318 | 3 | 3          | 0.10122019 | 0.30102999 |
| chr11 | 61170164 | 61170400 | 237    | 2  | 4 | 3 | 0 | 0.18734596 | 0.17593012 | 4 | 3          | 0.18734596 | 0.17593012 |
| chr11 | 61170400 | 61296134 | 125735 | 4  | 4 | 2 | 0 | 0.18734596 | 0.1755501  | 4 | 2          | 0.18734596 | 0.1755501  |
| chr11 | 61296134 | 61296189 | 56     | 1  | 5 | 2 | 0 | 0.30102999 | 0.1755501  | 4 | 2          | 0.11390336 | 0.1755501  |
| chr11 | 61296189 | 61328097 | 31909  | 1  | 5 | 2 | 0 | 0.45545077 | 0.1755501  | 3 | 2          | 0.05670724 | 0.1755501  |
| chr11 | 61328097 | 61349437 | 21341  | 1  | 4 | 2 | 0 | 0.30102999 | 0.1755501  | 2 | 2          | 0.10122019 | 0.1755501  |
| chr11 | 61349437 | 61410075 | 60639  | 1  | 3 | 2 | 0 | 0.17593012 | 0          |   |            |            |            |



|       |          |          |        |    |   |   |            |            |   |   |            |            |
|-------|----------|----------|--------|----|---|---|------------|------------|---|---|------------|------------|
| chr11 | 62407089 | 62407148 | 60     | 1  | 1 | 1 | 0.00478973 | 0.02438896 | 5 | 3 | 1.02643191 | 0.51676182 |
| chr11 | 62407148 | 62475483 | 68336  | 4  | 1 | 1 | 0.00478973 | 0.05404976 | 5 | 2 | 1.02643191 | 0.30102999 |
| chr11 | 62475483 | 62475540 | 58     | 1  | 2 | 1 | 0.02162467 | 0.05404976 | 5 | 2 | 0.68214471 | 0.30102999 |
| chr11 | 62475540 | 62495815 | 20276  | 1  | 0 | 1 | 0          | 0.05404976 | 5 | 2 | 1.60515106 | 0.30102999 |
| chr11 | 62495815 | 62502913 | 7099   | 2  | 0 | 1 | 0          | 0.02438896 | 5 | 3 | 1.60515106 | 0.51676182 |
| chr11 | 62502913 | 62534121 | 31209  | 2  | 0 | 1 | 0          | 0.05404976 | 5 | 2 | 1.60515106 | 0.30102999 |
| chr11 | 62534121 | 62571812 | 37692  | 4  | 0 | 1 | 0          | 0.02438896 | 5 | 3 | 1.60515106 | 0.51676182 |
| chr11 | 62571812 | 62571871 | 60     | 1  | 1 | 1 | 0.00478973 | 0.02438896 | 5 | 3 | 1.02643191 | 0.51676182 |
| chr11 | 62571871 | 62647750 | 75880  | 4  | 0 | 1 | 0          | 0.02438896 | 5 | 3 | 1.60515106 | 0.51676182 |
| chr11 | 62647750 | 62686758 | 39009  | 2  | 0 | 1 | 0          | 0.02438896 | 4 | 3 | 1.26272838 | 0.51676182 |
| chr11 | 62686758 | 62747892 | 61135  | 1  | 0 | 1 | 0          | 0.02438896 | 2 | 3 | 0.61140001 | 0.51676182 |
| chr11 | 62747892 | 62889579 | 141688 | 3  | 0 | 1 | 0          | 0.02438896 | 3 | 3 | 0.93173516 | 0.51676182 |
| chr11 | 62889579 | 62952099 | 62521  | 2  | 0 | 1 | 0          | 0.02438896 | 4 | 3 | 1.26272838 | 0.51676182 |
| chr11 | 62952099 | 62952158 | 60     | 1  | 1 | 1 | 0.01091641 | 0.02438896 | 4 | 3 | 0.76005302 | 0.51676182 |
| chr11 | 62952158 | 63069662 | 117505 | 2  | 1 | 1 | 0.02438896 | 0.02438896 | 3 | 3 | 0.51676182 | 0.51676182 |
| chr11 | 63069662 | 63069721 | 60     | 1  | 1 | 2 | 0.02438896 | 0.0429175  | 3 | 4 | 0.51676182 | 0.47744371 |
| chr11 | 63069721 | 63137588 | 67868  | 1  | 1 | 2 | 0.05404976 | 0.0429175  | 2 | 4 | 0.30102999 | 0.47744371 |
| chr11 | 63137588 | 63143087 | 5500   | 2  | 1 | 2 | 0.05404976 | 0.10122019 | 2 | 4 | 0.30102999 | 0.30102999 |
| chr11 | 63143087 | 63173946 | 30860  | 1  | 1 | 3 | 0.05404976 | 0.0429175  | 2 | 4 | 0.30102999 | 0.47744371 |
| chr11 | 63173946 | 63230830 | 56885  | 3  | 1 | 2 | 0.02438896 | 0.0429175  | 3 | 4 | 0.51676182 | 0.47744371 |
| chr11 | 63230830 | 63230889 | 60     | 1  | 1 | 2 | 0.02438896 | 0.10122019 | 3 | 4 | 0.51676182 | 0.30102999 |
| chr11 | 63230889 | 63278493 | 47605  | 1  | 1 | 3 | 0.05404976 | 0.10122019 | 2 | 4 | 0.30102999 | 0.30102999 |
| chr11 | 63278493 | 63342310 | 63818  | 3  | 1 | 1 | 0.05404976 | 0.01091641 | 2 | 4 | 0.30102999 | 0.76005302 |
| chr11 | 63342310 | 63342369 | 60     | 1  | 1 | 1 | 0.02438896 | 0.01091641 | 3 | 4 | 0.51676182 | 0.76005302 |
| chr11 | 63342369 | 63367171 | 24803  | 1  | 1 | 1 | 0.05404976 | 0.01091641 | 2 | 4 | 0.30102999 | 0.76005302 |
| chr11 | 63367171 | 63426700 | 59530  | 3  | 1 | 1 | 0.02438896 | 0.01091641 | 3 | 4 | 0.51676182 | 0.76005302 |
| chr11 | 63426700 | 63472345 | 45646  | 1  | 1 | 1 | 0.05404976 | 0.02438896 | 2 | 3 | 0.30102999 | 0.51676182 |
| chr11 | 63472345 | 63593273 | 120929 | 4  | 1 | 1 | 0.05404976 | 0.01091641 | 2 | 4 | 0.30102999 | 0.76005302 |
| chr11 | 63593273 | 63593332 | 60     | 1  | 1 | 3 | 0.02438896 | 0.05670724 | 3 | 5 | 0.51676182 | 0.45545077 |
| chr11 | 63593332 | 63666123 | 72792  | 5  | 1 | 3 | 0.05404976 | 0.05670724 | 2 | 5 | 0.30102999 | 0.45545077 |
| chr11 | 63666123 | 63756165 | 90043  | 3  | 1 | 3 | 0.1218695  | 0.10122019 | 1 | 4 | 0.1218695  | 0.30102999 |
| chr11 | 63756165 | 63882963 | 126799 | 4  | 1 | 3 | 0.1218695  | 0.05670724 | 1 | 5 | 0.1218695  | 0.45545077 |
| chr11 | 63882963 | 64358665 | 475703 | 25 | 1 | 4 | 0.1218695  | 0.11390336 | 1 | 5 | 0.1218695  | 0.30102999 |
| chr11 | 64358665 | 64358724 | 60     | 1  | 2 | 4 | 0.1575501  | 0.11390336 | 2 | 5 | 0.1575501  | 0.30102999 |
| chr11 | 64358724 | 64570971 | 212248 | 12 | 1 | 4 | 0.05404976 | 0.11390336 | 1 | 5 | 0.30102999 | 0.30102999 |
| chr11 | 64570971 | 64578407 | 7437   | 1  | 4 | 3 | 0.1575501  | 0.11390336 | 2 | 5 | 0.1575501  | 0.30102999 |
| chr11 | 64578407 | 64672741 | 94335  | 2  | 2 | 3 | 0.1575501  | 0.05670724 | 2 | 5 | 0.1575501  | 0.45545077 |
| chr11 | 64672741 | 64755476 | 82736  | 5  | 3 | 3 | 0.30102999 | 0.05670724 | 2 | 5 | 0.08289318 | 0.45545077 |
| chr11 | 64755476 | 64785672 | 30197  | 2  | 2 | 3 | 0.1575501  | 0.05670724 | 2 | 5 | 0.1575501  | 0.45545077 |
| chr11 | 64785672 | 64848925 | 63254  | 6  | 2 | 3 | 0.1575501  | 0.03070643 | 6 | 6 | 0.1575501  | 0.63695542 |
| chr11 | 64848925 | 64868919 | 19995  | 4  | 3 | 3 | 0.30102999 | 0.03070643 | 6 | 6 | 0.08289318 | 0.63695542 |
| chr11 | 64868919 | 64968857 | 99939  | 5  | 2 | 3 | 0.1575501  | 0.03070643 | 6 | 6 | 0.1575501  | 0.63695542 |
| chr11 | 64968857 | 64968916 | 60     | 1  | 3 | 3 | 0.17593012 | 0.03070643 | 6 | 6 | 0.17593012 | 0.63695542 |
| chr11 | 64968916 | 65057311 | 88396  | 2  | 2 | 3 | 0.1575501  | 0.03070643 | 2 | 6 | 0.1575501  | 0.63695542 |
| chr11 | 65057311 | 65065107 | 7797   | 2  | 3 | 3 | 0.30102999 | 0.03070643 | 6 | 6 | 0.08289318 | 0.63695542 |
| chr11 | 65065107 | 65109190 | 44084  | 2  | 2 | 3 | 0.30102999 | 0.03070643 | 1 | 6 | 0.05404976 | 0.63695542 |
| chr11 | 65109190 | 65109249 | 60     | 1  | 3 | 3 | 0.30102999 | 0.03070643 | 6 | 6 | 0.08289318 | 0.63695542 |
| chr11 | 65109249 | 65142778 | 33530  | 3  | 3 | 3 | 0.30102999 | 0.05670724 | 2 | 5 | 0.08289318 | 0.45545077 |
| chr11 | 65142778 | 65149392 | 6615   | 3  | 3 | 3 | 0.30102999 | 0.01598258 | 2 | 7 | 0.08289318 | 0.84395715 |
| chr11 | 65149392 | 65303260 | 153869 | 5  | 2 | 3 | 0.1575501  | 0.03070643 | 2 | 6 | 0.1575501  | 0.63695542 |
| chr11 | 65303260 | 65318425 | 15166  | 2  | 3 | 3 | 0.17593012 | 0.03070643 | 3 | 6 | 0.17593012 | 0.63695542 |
| chr11 | 65318425 | 65338387 | 19963  | 1  | 3 | 3 | 0.30102999 | 0.03070643 | 6 | 6 | 0.08289318 | 0.63695542 |
| chr11 | 65338387 | 65340664 | 2278   | 2  | 3 | 3 | 0.30102999 | 0.01598258 | 2 | 7 | 0.08289318 | 0.84395715 |
| chr11 | 65340664 | 65361644 | 20981  | 1  | 3 | 3 | 0.30102999 | 0.03070643 | 6 | 6 | 0.08289318 | 0.63695542 |
| chr11 | 65361644 | 65376658 | 15015  | 2  | 3 | 3 | 0.10122019 | 0.03070643 | 4 | 6 | 0.30102999 | 0.63695542 |
| chr11 | 65376658 | 65531771 | 155114 | 7  | 3 | 3 | 0.17593012 | 0.05670724 | 3 | 5 | 0.17593012 | 0.45545077 |
| chr11 | 65531771 | 65531830 | 60     | 1  | 4 | 3 | 0.30102999 | 0.05670724 | 3 | 5 | 0.10122019 | 0.45545077 |
| chr11 | 65531830 | 65544038 | 12209  | 1  | 4 | 3 | 0.17593012 | 0.05670724 | 3 | 5 | 0.17593012 | 0.45545077 |
| chr11 | 65544038 | 65544097 | 60     | 1  | 3 | 3 | 0.10122019 | 0.05670724 | 4 | 5 | 0.30102999 | 0.45545077 |
| chr11 | 65544097 | 65562392 | 18296  | 2  | 3 | 3 | 0.17593012 | 0.05670724 | 3 | 5 | 0.17593012 | 0.45545077 |
| chr11 | 65562392 | 65632191 | 69800  | 2  | 2 | 3 | 0.08289318 | 0.05670724 | 3 | 5 | 0.30102999 | 0.45545077 |
| chr11 | 65632191 | 65649068 | 16878  | 3  | 2 | 4 | 0.08289318 | 0.06713722 | 3 | 6 | 0.30102999 | 0.44141547 |
| chr11 | 65649068 | 65661361 | 12294  | 2  | 4 | 4 | 0.0429175  | 0.06713722 | 4 | 6 | 0.47744371 | 0.44141547 |
| chr11 | 65661361 | 65688272 | 26912  | 4  | 2 | 4 | 0.1575501  | 0.06713722 | 2 | 6 | 0.1575501  | 0.44141547 |
| chr11 | 65688272 | 65724878 | 36607  | 1  | 4 | 4 | 0.1575501  | 0.11390336 | 4 | 5 | 0.1575501  | 0.30102999 |
| chr11 | 65724878 | 65801513 | 15636  | 11 | 4 | 4 | 0.18734596 | 0.11390336 | 5 | 4 | 0.18734596 | 0.30102999 |
| chr11 | 65801513 | 65883969 | 102457 | 2  | 4 | 4 | 0.30102999 | 0.11390336 | 3 | 5 | 0.10122019 | 0.30102999 |
| chr11 | 65883969 | 65984026 | 58     | 1  | 4 | 4 | 0.18734596 | 0.11390336 | 4 | 5 | 0.18734596 | 0.30102999 |
| chr11 | 65984026 | 66046441 | 62416  | 3  | 4 | 4 | 0.30102999 | 0.11390336 | 3 | 5 | 0.10122019 | 0.30102999 |
| chr11 | 66046441 | 66052099 | 5659   | 2  | 4 | 4 | 0.18734596 | 0.11390336 | 4 | 5 | 0.18734596 | 0.30102999 |
| chr11 | 66052099 | 66055962 | 3864   | 1  | 4 | 4 | 0.18734596 | 0.18734596 | 4 | 5 | 0.18734596 | 0.18734596 |
| chr11 | 66055962 | 66063266 | 7305   | 1  | 4 | 4 | 0.30102999 | 0.18734596 | 3 | 4 | 0.10122019 | 0.18734596 |
| chr11 | 66063266 | 66101855 | 38590  | 2  | 4 | 4 | 0.30102999 | 0.11390336 | 3 | 5 | 0.10122019 | 0.30102999 |
| chr11 | 66101855 | 66134825 | 32971  | 5  | 4 | 4 | 0.18734596 | 0.11390336 | 4 | 5 | 0.18734596 | 0.30102999 |
| chr11 | 66134825 | 66157106 | 22282  | 1  | 4 | 4 | 0.30102999 | 0.11390336 | 3 | 5 | 0.10122019 | 0.30102999 |
| chr11 | 66157106 | 66157165 | 60     | 1  | 4 | 4 | 0.30102999 | 0.03812622 | 3 | 7 | 0.10122019 | 0.60763643 |
| chr11 | 66157165 | 66204328 | 47164  | 2  | 3 | 4 | 0.17593012 | 0.03812622 | 3 | 7 | 0.17593012 | 0.60763643 |
| chr11 | 66204328 | 66204387 | 60     | 1  | 4 | 4 | 0.30102999 | 0.03812622 | 7 | 7 | 0.10122019 | 0.60763643 |
| chr11 | 66204387 | 66276296 | 71910  | 4  | 4 | 4 | 0.30102999 | 0.03812622 | 2 | 7 | 0.08289318 | 0.60763643 |
| chr11 | 66276296 | 66276355 | 60     | 1  | 5 | 4 | 0.68214471 | 0.03812622 | 2 | 7 | 0.02162467 | 0.60763643 |
| chr11 | 66276355 | 66316040 | 39686  | 2  | 4 | 4 | 0.47744371 | 0.06713722 | 2 | 6 | 0.0429175  | 0.44141547 |
| chr11 | 66316040 | 66330922 | 14883  | 2  | 5 | 4 | 0.68214471 | 0.06713722 | 2 | 6 | 0.02162467 | 0.44141547 |
| chr11 | 66330922 | 66331133 | 212    | 2  | 5 | 4 | 0.68214471 | 0.02074928 | 8 | 8 | 0.02162467 | 0.79906872 |
| chr11 | 66331133 | 66386395 | 55263  | 5  | 4 | 4 | 0.47744371 | 0.06713722 | 2 | 6 | 0.0429175  | 0.44141547 |
| chr11 | 66386395 | 66397095 | 10701  | 2  | 4 | 4 | 0.30102999 | 0.06713722 | 3 | 6 | 0.10122019 | 0.44141547 |
| chr11 | 66397095 | 66433028 | 35934  | 2  | 4 | 4 | 0.47744371 | 0.06713722 | 2 | 6 | 0.0429175  | 0.44141547 |
| chr11 | 66433028 | 66479188 | 46161  | 3  | 4 | 4 | 0.30102999 | 0.06713722 | 3 | 6 | 0.10122019 | 0.44141547 |
| chr11 | 66479188 | 66613959 | 13472  | 4  | 3 | 4 | 0.17593012 | 0.11390336 | 3 | 5 | 0.17593012 | 0.30102999 |
| chr11 | 66613959 | 66627969 | 14011  | 2  | 4 | 4 | 0.30102999 | 0.11390336 | 3 | 5 | 0.10122019 | 0.30102999 |
| chr11 | 66627969 | 66675429 | 47461  | 2  | 3 | 4 | 0.17593012 | 0.11390336 | 3 | 5 | 0.17593012 | 0.30102999 |
| chr11 | 66675429 | 66888750 | 213322 | 6  | 2 | 4 | 0.08289318 | 0.11390336 |   |   |            |            |

|       |          |          |        |    |   |   |            |            |   |   |            |            |
|-------|----------|----------|--------|----|---|---|------------|------------|---|---|------------|------------|
| chr11 | 68287033 | 68305307 | 18275  | 1  | 2 | 1 | 0.1575501  | 0.05404976 | 2 | 2 | 0.1575501  | 0.30102999 |
| chr11 | 68305307 | 68336631 | 31325  | 1  | 1 | 1 | 0.05404976 | 0.05404976 | 2 | 2 | 0.30102999 | 0.30102999 |
| chr11 | 68336631 | 68336690 | 60     | 1  | 1 | 1 | 0.05404976 | 0.02438896 | 2 | 3 | 0.30102999 | 0.51676182 |
| chr11 | 68336690 | 68381504 | 44815  | 1  | 1 | 1 | 0.05404976 | 0.1218695  | 2 | 1 | 0.30102999 | 0.1218695  |
| chr11 | 68381504 | 68454441 | 72938  | 2  | 1 | 1 | 0.05404976 | 0.05404976 | 2 | 2 | 0.30102999 | 0.30102999 |
| chr11 | 68454441 | 68475784 | 21344  | 3  | 1 | 1 | 0.02438896 | 0.05404976 | 3 | 2 | 0.51676182 | 0.30102999 |
| chr11 | 68475784 | 68549308 | 73525  | 6  | 1 | 1 | 0.02438896 | 0.02438896 | 3 | 3 | 0.51676182 | 0.51676182 |
| chr11 | 68549308 | 68566737 | 17430  | 2  | 2 | 1 | 0.0429175  | 0.01091641 | 4 | 4 | 0.47744371 | 0.76005302 |
| chr11 | 68566737 | 68601605 | 34869  | 1  | 1 | 1 | 0.02438896 | 0.01091641 | 3 | 4 | 0.51676182 | 0.76005302 |
| chr11 | 68601605 | 68649827 | 48223  | 1  | 1 | 1 | 0.02438896 | 0.02438896 | 3 | 3 | 0.51676182 | 0.51676182 |
| chr11 | 68649827 | 68682282 | 32456  | 2  | 2 | 1 | 0.0429175  | 0.02438896 | 4 | 3 | 0.47744371 | 0.51676182 |
| chr11 | 68682282 | 68771883 | 89602  | 2  | 2 | 1 | 0.08289318 | 0.05404976 | 3 | 2 | 0.30102999 | 0.30102999 |
| chr11 | 68771883 | 68771942 | 60     | 1  | 2 | 1 | 0.0429175  | 0.01091641 | 4 | 4 | 0.47744371 | 0.76005302 |
| chr11 | 68771942 | 68818714 | 46773  | 1  | 2 | 1 | 0.0429175  | 0.02438896 | 4 | 3 | 0.47744371 | 0.51676182 |
| chr11 | 68818714 | 68818773 | 60     | 1  | 2 | 1 | 0.02162467 | 0.02438896 | 5 | 3 | 0.68214471 | 0.51676182 |
| chr11 | 68818773 | 68897871 | 79099  | 2  | 1 | 1 | 0.01091641 | 0.02438896 | 4 | 3 | 0.76005302 | 0.51676182 |
| chr11 | 68897871 | 68928165 | 30295  | 2  | 1 | 1 | 0.00478973 | 0.02438896 | 5 | 3 | 1.02643191 | 0.51676182 |
| chr11 | 68928165 | 69048284 | 120120 | 1  | 1 | 1 | 0.01091641 | 0.02438896 | 4 | 3 | 0.76005302 | 0.51676182 |
| chr11 | 69048284 | 69234367 | 186084 | 4  | 1 | 1 | 0.00478973 | 0.02438896 | 5 | 3 | 1.02643191 | 0.51676182 |
| chr11 | 69234367 | 69587837 | 353471 | 6  | 1 | 1 | 0.00478973 | 0.01091641 | 5 | 4 | 1.02643191 | 0.76005302 |
| chr11 | 69587837 | 69587896 | 60     | 1  | 2 | 1 | 0.02162467 | 0.01091641 | 5 | 4 | 0.68214471 | 0.76005302 |
| chr11 | 69587896 | 69630454 | 42559  | 3  | 1 | 1 | 0.00478973 | 0.01091641 | 5 | 4 | 1.02643191 | 0.76005302 |
| chr11 | 69630454 | 69891573 | 261120 | 1  | 1 | 1 | 0.01091641 | 0.01091641 | 4 | 4 | 0.76005302 | 0.76005302 |
| chr11 | 69891573 | 69891632 | 60     | 1  | 2 | 1 | 0.0429175  | 0.01091641 | 4 | 4 | 0.47744371 | 0.76005302 |
| chr11 | 69891632 | 70129305 | 237674 | 9  | 2 | 1 | 0.08289318 | 0.01091641 | 3 | 4 | 0.30102999 | 0.76005302 |
| chr11 | 70129305 | 70181821 | 52517  | 1  | 2 | 1 | 0.1575501  | 0.01091641 | 2 | 2 | 0.1575501  | 0.76005302 |
| chr11 | 70181821 | 70355116 | 153296 | 3  | 2 | 0 | 0.1575501  | 0          | 2 | 3 | 0.1575501  | 0.93173516 |
| chr11 | 70355116 | 70367700 | 32585  | 2  | 2 | 0 | 0.0429175  | 0.02438896 | 2 | 4 | 0.47744371 | 0.51676182 |
| chr11 | 70367700 | 70647318 | 279619 | 5  | 2 | 0 | 0.30102999 | 0          | 1 | 3 | 0.05404976 | 0.93173516 |
| chr11 | 70647318 | 70647377 | 60     | 1  | 2 | 0 | 0.30102999 | 0          | 1 | 4 | 0.05404976 | 1.26272838 |
| chr11 | 70647377 | 70709208 | 61832  | 1  | 2 | 0 | 0.61140001 | 0          | 0 | 4 | 0          | 1.26272838 |
| chr11 | 70709208 | 70778118 | 68911  | 3  | 2 | 0 | 0.61140001 | 0.01091641 | 0 | 4 | 0          | 0.76005302 |
| chr11 | 70778118 | 70853074 | 74957  | 2  | 2 | 1 | 0.61140001 | 0.00478973 | 0 | 5 | 0          | 1.02643191 |
| chr11 | 70853074 | 71090652 | 237579 | 3  | 2 | 1 | 0.61140001 | 0.00204627 | 0 | 6 | 0          | 1.31360226 |
| chr11 | 71090652 | 71155661 | 65010  | 2  | 2 | 1 | 0.1575501  | 0.00204627 | 2 | 6 | 0.1575501  | 1.31360226 |
| chr11 | 71155661 | 71260287 | 104627 | 3  | 2 | 1 | 0.1575501  | 8.47E-04   | 2 | 7 | 0.1575501  | 1.62048027 |
| chr11 | 71260287 | 71286776 | 26490  | 1  | 2 | 1 | 0.1575501  | 0.00204627 | 2 | 6 | 0.1575501  | 1.31360226 |
| chr11 | 71286776 | 71286835 | 60     | 1  | 5 | 1 | 0.68214471 | 0.00204627 | 2 | 6 | 0.02162467 | 1.31360226 |
| chr11 | 71286835 | 71627541 | 340707 | 1  | 3 | 1 | 0.30102999 | 0.00204627 | 6 | 8 | 0.08289318 | 1.31360226 |
| chr11 | 71627541 | 71648032 | 20492  | 2  | 3 | 0 | 0.30102999 | 0.00221948 | 2 | 8 | 0.08289318 | 1.44210395 |
| chr11 | 71648032 | 71690233 | 42202  | 2  | 3 | 0 | 0.51676182 | 0.00221948 | 1 | 8 | 0.02438896 | 1.44210395 |
| chr11 | 71690233 | 71690292 | 60     | 1  | 2 | 2 | 0.30102999 | 0.00221948 | 2 | 8 | 0.08289318 | 1.44210395 |
| chr11 | 71690292 | 71790023 | 99732  | 6  | 2 | 2 | 0.30102999 | 0.00221948 | 1 | 8 | 0.05404976 | 1.44210395 |
| chr11 | 71790023 | 71849521 | 59499  | 6  | 2 | 2 | 0.1575501  | 0.00221948 | 2 | 2 | 0.1575501  | 1.44210395 |
| chr11 | 71849521 | 72013162 | 163642 | 6  | 2 | 0 | 0.30102999 | 0.00221948 | 8 | 8 | 0.05404976 | 1.44210395 |
| chr11 | 72013162 | 72013220 | 59     | 1  | 2 | 2 | 0.51676182 | 0.00221948 | 1 | 8 | 0.02438896 | 1.44210395 |
| chr11 | 72013220 | 72123775 | 110556 | 3  | 2 | 2 | 0.30102999 | 0.00221948 | 8 | 8 | 0.05404976 | 1.44210395 |
| chr11 | 72123775 | 72287622 | 163848 | 4  | 2 | 2 | 0.51676182 | 0.00221948 | 1 | 8 | 0.02438896 | 1.44210395 |
| chr11 | 72287622 | 72370666 | 83045  | 5  | 3 | 2 | 0.30102999 | 0.00221948 | 8 | 8 | 0.08289318 | 1.44210395 |
| chr11 | 72370666 | 72444713 | 74048  | 2  | 2 | 2 | 0.30102999 | 0.00493743 | 2 | 7 | 0.08289318 | 1.16581773 |
| chr11 | 72444713 | 72664318 | 219606 | 7  | 3 | 2 | 0.30102999 | 0.00221948 | 8 | 8 | 0.08289318 | 1.44210395 |
| chr11 | 72664318 | 72664377 | 60     | 1  | 4 | 2 | 0.47744371 | 0.00221948 | 2 | 8 | 0.0429175  | 1.44210395 |
| chr11 | 72664377 | 72754376 | 90000  | 3  | 3 | 2 | 0.30102999 | 0.00221948 | 8 | 8 | 0.08289318 | 1.44210395 |
| chr11 | 72754376 | 72754435 | 60     | 1  | 3 | 2 | 0.10122019 | 0.00221948 | 4 | 8 | 0.30102999 | 1.44210395 |
| chr11 | 72754435 | 72794794 | 40360  | 1  | 3 | 2 | 0.17593012 | 0.00221948 | 3 | 8 | 0.17593012 | 1.44210395 |
| chr11 | 72794794 | 72851213 | 56420  | 1  | 3 | 2 | 0.17593012 | 0.01053319 | 3 | 6 | 0.17593012 | 0.91219088 |
| chr11 | 72851213 | 72939798 | 88586  | 2  | 4 | 2 | 0.30102999 | 0.01053319 | 3 | 6 | 0.11012019 | 0.91219088 |
| chr11 | 72939798 | 72939853 | 56     | 1  | 4 | 2 | 0.18734596 | 0.01053319 | 4 | 6 | 0.18734596 | 0.91219088 |
| chr11 | 72939853 | 72973271 | 33419  | 3  | 2 | 2 | 0.10122019 | 0.02162467 | 4 | 5 | 0.30102999 | 0.68214471 |
| chr11 | 72973271 | 73023132 | 49862  | 3  | 3 | 2 | 0.17593012 | 0.02162467 | 3 | 5 | 0.17593012 | 0.68214471 |
| chr11 | 73023132 | 73094436 | 71305  | 3  | 3 | 2 | 0.10122019 | 0.02162467 | 4 | 5 | 0.30102999 | 0.68214471 |
| chr11 | 73094436 | 73094490 | 55     | 1  | 3 | 2 | 0.09670724 | 0.02162467 | 5 | 5 | 0.45545077 | 0.68214471 |
| chr11 | 73094490 | 73358393 | 263904 | 6  | 3 | 2 | 0.10122019 | 0.0429175  | 4 | 4 | 0.30102999 | 0.47744371 |
| chr11 | 73358393 | 73419514 | 61122  | 3  | 2 | 2 | 0.11390336 | 0.0429175  | 5 | 4 | 0.30102999 | 0.47744371 |
| chr11 | 73419514 | 73471014 | 51501  | 2  | 5 | 2 | 0.19510895 | 0.0429175  | 5 | 4 | 0.19510895 | 0.47744371 |
| chr11 | 73471014 | 73471067 | 54     | 1  | 2 | 2 | 0.12309572 | 0.0429175  | 6 | 4 | 0.30102999 | 0.47744371 |
| chr11 | 73471067 | 73465640 | 75474  | 2  | 5 | 2 | 0.19510895 | 0.0429175  | 5 | 4 | 0.19510895 | 0.47744371 |
| chr11 | 73465640 | 73638725 | 92186  | 5  | 2 | 2 | 0.19510895 | 0.08289318 | 5 | 3 | 0.19510895 | 0.30102999 |
| chr11 | 73638725 | 73691098 | 52374  | 1  | 5 | 2 | 0.19510895 | 0.1575501  | 5 | 2 | 0.1575501  | 0.1575501  |
| chr11 | 73691098 | 73691152 | 55     | 1  | 6 | 2 | 0.30102999 | 0.1575501  | 5 | 2 | 0.12309572 | 0.1575501  |
| chr11 | 73691152 | 73714700 | 23549  | 1  | 6 | 1 | 0.30102999 | 0.05404976 | 5 | 2 | 0.12309572 | 0.30102999 |
| chr11 | 73714700 | 73749791 | 35092  | 2  | 6 | 1 | 0.20064824 | 0.05404976 | 6 | 2 | 0.20064824 | 0.30102999 |
| chr11 | 73749791 | 73749850 | 60     | 1  | 6 | 1 | 0.129913   | 0.02438896 | 7 | 3 | 0.30102999 | 0.51676182 |
| chr11 | 73749850 | 74062476 | 312627 | 11 | 6 | 3 | 0.20064824 | 0.02438896 | 6 | 3 | 0.20064824 | 0.51676182 |
| chr11 | 74062476 | 74166248 | 103773 | 3  | 5 | 3 | 0.12309572 | 0.02438896 | 6 | 3 | 0.30102999 | 0.51676182 |
| chr11 | 74166248 | 74465067 | 298820 | 7  | 5 | 1 | 0.07511598 | 0.02438896 | 7 | 3 | 0.43181735 | 0.51676182 |
| chr11 | 74465067 | 74571559 | 106493 | 2  | 4 | 1 | 0.03812622 | 0.02438896 | 7 | 3 | 0.60763643 | 0.51676182 |
| chr11 | 74571559 | 74571618 | 60     | 1  | 5 | 1 | 0.07511598 | 0.01091641 | 7 | 4 | 0.43181735 | 0.76005302 |
| chr11 | 74571618 | 74670859 | 99242  | 2  | 4 | 1 | 0.18734596 | 0.01091641 | 4 | 4 | 0.18734596 | 0.76005302 |
| chr11 | 74670859 | 74670918 | 60     | 1  | 4 | 1 | 0.03812622 | 0.01091641 | 7 | 4 | 0.60763643 | 0.76005302 |
| chr11 | 74670918 | 74718704 | 47787  | 2  | 4 | 1 | 0.18734596 | 0.01091641 | 4 | 4 | 0.18734596 | 0.76005302 |
| chr11 | 74718704 | 74718763 | 60     | 1  | 4 | 1 | 0.06713722 | 0.01091641 | 6 | 4 | 0.44141547 | 0.76005302 |
| chr11 | 74718763 | 74805354 | 86592  | 1  | 4 | 1 | 0.18734596 | 0.01091641 | 4 | 4 | 0.18734596 | 0.76005302 |
| chr11 | 74805354 | 74909934 | 104581 | 4  | 4 | 1 | 0.11390336 | 0.01091641 | 5 | 4 | 0.30102999 | 0.76005302 |
| chr11 | 74909934 | 74909993 | 60     | 1  | 5 | 1 | 0.19510895 | 0.01091641 | 5 | 4 | 0.19510895 | 0.76005302 |
| chr11 | 74909993 | 75022580 | 112588 | 2  | 3 | 1 | 0.05670724 | 0.01091641 | 5 | 4 | 0.45545077 | 0.76005302 |
| chr11 | 75022580 | 75022639 | 60     | 1  | 5 | 1 | 0.19510895 | 0.01091641 | 5 | 4 | 0.19510895 | 0.76005302 |
| chr11 | 75022639 | 75049688 | 27050  | 1  | 4 | 1 | 0.30102999 | 0.01091641 | 3 | 4 | 0.10122019 | 0.76005302 |
| chr11 | 75049688 | 75081755 | 32068  | 1  | 4 | 1 | 0.17593012 | 0.01091641 | 3 | 4 | 0.17593012 | 0.76005302 |
| chr11 | 75081755 | 75081814 | 60     | 1  | 3 | 1 | 0.17593012 | 0.00204627 | 3 | 6 | 0.17593012 | 1.313      |

|       |          |          |        |   |   |   |            |            |   |   |            |            |            |
|-------|----------|----------|--------|---|---|---|------------|------------|---|---|------------|------------|------------|
| chr11 | 76637590 | 76637648 | 59     | 1 | 7 | 1 | 0.30102999 | 8.47E-04   | 6 | 7 | 0.129913   | 1.62048027 |            |
| chr11 | 76637648 | 76696684 | 59037  | 2 | 4 | 1 | 0.06713722 | 0.00204627 | 6 | 6 | 0.44141547 | 1.31360226 |            |
| chr11 | 76696684 | 76696743 | 60     | 1 | 6 | 1 | 0.20064824 | 0.00204627 | 6 | 6 | 0.20064824 | 1.31360226 |            |
| chr11 | 76696743 | 76752340 | 55598  | 1 | 5 | 1 | 0.12309572 | 0.00478973 | 6 | 5 | 0.30102999 | 1.02643191 |            |
| chr11 | 76752340 | 76752384 | 45     | 1 | 5 | 1 | 0.12309572 | 0.00204627 | 6 | 6 | 0.30102999 | 1.31360226 |            |
| chr11 | 76752384 | 76777036 | 24653  | 1 | 5 | 1 | 0.19510895 | 0.00204627 | 5 | 6 | 0.19510895 | 1.31360226 |            |
| chr11 | 76777036 | 76777089 | 54     | 1 | 5 | 1 | 0.12309572 | 8.47E-04   | 6 | 7 | 0.30102999 | 1.62048027 |            |
| chr11 | 76777089 | 76875656 | 98568  | 4 | 5 | 1 | 0.12309572 | 0.00478973 | 6 | 5 | 0.30102999 | 1.02643191 |            |
| chr11 | 76875656 | 76875715 | 60     | 1 | 6 | 1 | 0.20064824 | 0.00204627 | 6 | 6 | 0.20064824 | 1.31360226 |            |
| chr11 | 76875715 | 76894638 | 18924  | 1 | 5 | 1 | 0.12309572 | 0.00204627 | 6 | 6 | 0.30102999 | 1.31360226 |            |
| chr11 | 76894638 | 76926116 | 31479  | 1 | 5 | 1 | 0.12309572 | 0.02438896 | 6 | 3 | 0.30102999 | 0.51676182 |            |
| chr11 | 76926116 | 76956469 | 30354  | 2 | 5 | 1 | 0.12309572 | 0.01091641 | 6 | 4 | 0.30102999 | 0.76005302 |            |
| chr11 | 76956469 | 76956528 | 60     | 1 | 5 | 1 | 0.12309572 | 0.00478973 | 6 | 5 | 0.30102999 | 1.02643191 |            |
| chr11 | 76956528 | 77035710 | 79183  | 3 | 5 | 1 | 0.12309572 | 0.01091641 | 6 | 4 | 0.30102999 | 0.76005302 |            |
| chr11 | 77035710 | 77066757 | 31048  | 2 | 5 | 1 | 0.12309572 | 0.00478973 | 6 | 5 | 0.30102999 | 1.02643191 |            |
| chr11 | 77066757 | 77103361 | 36605  | 1 | 5 | 1 | 0.12309572 | 0.01091641 | 6 | 4 | 0.30102999 | 0.76005302 |            |
| chr11 | 77103361 | 77103420 | 60     | 1 | 6 | 1 | 0.129913   | 0.01091641 | 7 | 4 | 0.30102999 | 0.76005302 |            |
| chr11 | 77103420 | 77130017 | 26598  | 5 | 1 | 1 | 0.12309572 | 0.01091641 | 6 | 4 | 0.30102999 | 0.76005302 |            |
| chr11 | 77130017 | 77130076 | 60     | 1 | 6 | 1 | 0.20064824 | 0.00478973 | 6 | 5 | 0.20064824 | 1.02643191 |            |
| chr11 | 77130076 | 77160642 | 30567  | 1 | 6 | 1 | 0.20064824 | 0.02438896 | 6 | 3 | 0.20064824 | 0.51676182 |            |
| chr11 | 77160642 | 77160701 | 60     | 1 | 7 | 1 | 0.30102999 | 0.129913   | 6 | 3 | 0.129913   | 0.51676182 |            |
| chr11 | 77160701 | 77230088 | 82308  | 1 | 6 | 1 | 0.20064824 | 0.02438896 | 6 | 4 | 0.20064824 | 0.51676182 |            |
| chr11 | 77230088 | 77303540 | 60533  | 2 | 6 | 1 | 0.20064824 | 0.01091641 | 6 | 4 | 0.20064824 | 0.76005302 |            |
| chr11 | 77303540 | 77346779 | 43240  | 2 | 6 | 1 | 0.20064824 | 0.00478973 | 6 | 5 | 0.20064824 | 1.02643191 |            |
| chr11 | 77346779 | 77458140 | 111362 | 3 | 6 | 1 | 0.20064824 | 0.01091641 | 6 | 4 | 0.20064824 | 0.76005302 |            |
| chr11 | 77458140 | 77590215 | 132076 | 2 | 6 | 1 | 0.19510895 | 0.02438896 | 5 | 3 | 0.19510895 | 0.51676182 |            |
| chr11 | 77590215 | 77590274 | 60     | 1 | 6 | 1 | 0.20064824 | 0.01091641 | 6 | 4 | 0.20064824 | 0.76005302 |            |
| chr11 | 77590274 | 77672088 | 81815  | 2 | 5 | 1 | 0.19510895 | 0.01091641 | 5 | 4 | 0.19510895 | 0.76005302 |            |
| chr11 | 77672088 | 7775320  | 103233 | 4 | 6 | 1 | 0.30102999 | 0.00478973 | 5 | 5 | 0.12309572 | 1.02643191 |            |
| chr11 | 7775320  | 7788679  | 113360 | 5 | 6 | 1 | 0.30102999 | 0.00204627 | 5 | 6 | 0.12309572 | 1.31360226 |            |
| chr11 | 7788679  | 77888738 | 60     | 1 | 6 | 1 | 0.20064824 | 0.00204627 | 6 | 6 | 0.20064824 | 1.31360226 |            |
| chr11 | 77888738 | 77926688 | 37951  | 5 | 1 | 1 | 0.19510895 | 0.00478973 | 5 | 5 | 0.19510895 | 1.02643191 |            |
| chr11 | 77926688 | 77970987 | 44300  | 1 | 4 | 1 | 0.11390336 | 0.00478973 | 5 | 5 | 0.30102999 | 1.02643191 |            |
| chr11 | 77970987 | 78024310 | 53324  | 2 | 4 | 1 | 0.11390336 | 0.00204627 | 5 | 6 | 0.30102999 | 1.31360226 |            |
| chr11 | 78024310 | 78093754 | 69445  | 3 | 4 | 1 | 0.11390336 | 8.47E-04   | 5 | 7 | 0.30102999 | 1.62048027 |            |
| chr11 | 78093754 | 78204103 | 110350 | 2 | 4 | 1 | 0.11390336 | 0.00204627 | 5 | 6 | 0.30102999 | 1.31360226 |            |
| chr11 | 78204103 | 78204162 | 60     | 1 | 4 | 1 | 0.06713722 | 8.47E-04   | 6 | 7 | 0.44141547 | 1.62048027 |            |
| chr11 | 78204162 | 78364494 | 160333 | 3 | 4 | 1 | 0.18734596 | 8.47E-04   | 4 | 7 | 0.18734596 | 1.62048027 |            |
| chr11 | 78364494 | 78364553 | 60     | 1 | 4 | 2 | 0.18734596 | 0.00493743 | 4 | 7 | 0.18734596 | 1.6581773  |            |
| chr11 | 78364553 | 78399909 | 35357  | 1 | 4 | 2 | 0.18734596 | 0.01053319 | 4 | 6 | 0.18734596 | 0.91219088 |            |
| chr11 | 78399909 | 78460316 | 60408  | 1 | 4 | 1 | 0.18734596 | 0.00478973 | 4 | 5 | 0.18734596 | 1.02643191 |            |
| chr11 | 78460316 | 78497793 | 37478  | 2 | 4 | 1 | 0.18734596 | 0.00204627 | 4 | 6 | 0.18734596 | 1.31360226 |            |
| chr11 | 78497793 | 78625598 | 127806 | 2 | 4 | 1 | 0.18734596 | 0.01091641 | 4 | 4 | 0.18734596 | 0.76005302 |            |
| chr11 | 78625598 | 78625657 | 60     | 1 | 4 | 1 | 0.18734596 | 0.00478973 | 4 | 5 | 0.18734596 | 1.02643191 |            |
| chr11 | 78625657 | 78748710 | 123054 | 2 | 4 | 1 | 0.47744371 | 0.01091641 | 2 | 4 | 0.0429175  | 0.76005302 |            |
| chr11 | 78748710 | 78748769 | 60     | 1 | 4 | 1 | 0.18734596 | 0.01091641 | 4 | 4 | 0.18734596 | 0.76005302 |            |
| chr11 | 78748769 | 78778362 | 29594  | 3 | 1 | 1 | 0.10122019 | 0.01091641 | 4 | 4 | 0.30102999 | 0.76005302 |            |
| chr11 | 78778362 | 78898511 | 120150 | 2 | 3 | 1 | 0.17593012 | 0.01091641 | 3 | 4 | 0.17593012 | 0.76005302 |            |
| chr11 | 78898511 | 78898570 | 60     | 1 | 3 | 1 | 0.10122019 | 0.01091641 | 4 | 4 | 0.30102999 | 0.76005302 |            |
| chr11 | 78898570 | 78993275 | 94706  | 2 | 3 | 1 | 0.17593012 | 0.05404976 | 3 | 2 | 0.17593012 | 0.30102999 |            |
| chr11 | 78993275 | 78993334 | 60     | 1 | 3 | 1 | 0.17593012 | 0.01091641 | 3 | 4 | 0.17593012 | 0.76005302 |            |
| chr11 | 78993334 | 79038442 | 45109  | 1 | 3 | 1 | 0.30102999 | 0.01091641 | 2 | 4 | 0.08289318 | 0.76005302 |            |
| chr11 | 79038442 | 79038501 | 60     | 1 | 3 | 1 | 0.30102999 | 0.00478973 | 2 | 5 | 0.08289318 | 1.02643191 |            |
| chr11 | 79038501 | 79218731 | 180231 | 3 | 3 | 0 | 0.30102999 | 0          | 2 | 2 | 0.08289318 | 0.61140001 |            |
| chr11 | 79218731 | 79218790 | 60     | 1 | 3 | 0 | 0.30102999 | 0          | 2 | 3 | 0.08289318 | 0.93173516 |            |
| chr11 | 79218790 | 79511172 | 292383 | 2 | 3 | 0 | 0.30102999 | 0          | 2 | 2 | 0.08289318 | 0.61140001 |            |
| chr11 | 79511172 | 79511231 | 60     | 1 | 3 | 0 | 0.30102999 | 0          | 2 | 3 | 0.08289318 | 0.93173516 |            |
| chr11 | 79511231 | 79715447 | 204217 | 1 | 2 | 0 | 0.1575501  | 0          | 2 | 3 | 0.1575501  | 0.93173516 |            |
| chr11 | 79715447 | 79715506 | 60     | 1 | 2 | 0 | 0.1575501  | 0          | 2 | 4 | 0.1575501  | 1.26272838 |            |
| chr11 | 79715506 | 80112382 | 396877 | 2 | 1 | 0 | 0.1218695  | 0          | 1 | 0 | 0.1218695  | 0          |            |
| chr11 | 80112382 | 80248939 | 136558 | 1 | 1 | 0 | 0.30102999 | 0          | 0 | 0 | 0          | 0          |            |
| chr11 | 80248939 | 80369045 | 120107 | 2 | 1 | 0 | 0.30102999 | 0          | 0 | 1 | 0          | 0.30102999 |            |
| chr11 | 80369045 | 81113118 | 744074 | 4 | 0 | 0 | 0          | 0          | 0 | 1 | 0          | 0.30102999 |            |
| chr11 | 81113118 | 81467310 | 354193 | 4 | 1 | 0 | 0.30102999 | 0          | 0 | 4 | 0          | 1.26272838 |            |
| chr11 | 81467310 | 81467369 | 60     | 1 | 1 | 0 | 0.30102999 | 0          | 0 | 5 | 0          | 1.60515106 |            |
| chr11 | 81467369 | 81582093 | 114725 | 1 | 1 | 0 | 0.05404976 | 0          | 1 | 0 | 0          | 0.61140001 |            |
| chr11 | 81582093 | 81582152 | 60     | 1 | 1 | 0 | 0.05404976 | 0          | 2 | 5 | 0.30102999 | 1.60515106 |            |
| chr11 | 81582152 | 81669620 | 87469  | 1 | 1 | 0 | 0.05404976 | 0          | 2 | 4 | 0.30102999 | 1.26272838 |            |
| chr11 | 81669620 | 81771852 | 102233 | 2 | 2 | 0 | 0.1575501  | 0          | 2 | 4 | 0.1575501  | 1.26272838 |            |
| chr11 | 81771852 | 81771911 | 60     | 1 | 2 | 0 | 0.30102999 | 0          | 2 | 4 | 0.08289318 | 1.26272838 |            |
| chr11 | 81771911 | 81961087 | 189177 | 3 | 0 | 0 | 0.51676182 | 0          | 2 | 1 | 4          | 0.02438896 | 1.26272838 |
| chr11 | 81961087 | 82031482 | 70396  | 2 | 3 | 0 | 0.05670724 | 0          | 5 | 4 | 0.45545077 | 1.26272838 |            |
| chr11 | 82031482 | 82031541 | 60     | 1 | 3 | 0 | 0.05670724 | 0.00204627 | 5 | 6 | 0.45545077 | 1.31360226 |            |
| chr11 | 82031541 | 82441687 | 410147 | 3 | 2 | 1 | 0.10122019 | 0.00204627 | 4 | 6 | 0.30102999 | 1.31360226 |            |
| chr11 | 82441687 | 82443427 | 1741   | 2 | 4 | 1 | 0.18734596 | 0.01053319 | 4 | 6 | 0.18734596 | 0.91219088 |            |
| chr11 | 82443427 | 82610479 | 167053 | 4 | 3 | 2 | 0.10122019 | 0.01053319 | 4 | 6 | 0.30102999 | 0.91219088 |            |
| chr11 | 82610479 | 82902701 | 292223 | 9 | 4 | 2 | 0.18734596 | 0.01053319 | 4 | 6 | 0.18734596 | 0.91219088 |            |
| chr11 | 82902701 | 82952017 | 49317  | 2 | 4 | 3 | 0.11390336 | 0.03070643 | 5 | 6 | 0.30102999 | 0.63695542 |            |
| chr11 | 82952017 | 82995386 | 43370  | 2 | 4 | 2 | 0.11390336 | 0.01053319 | 5 | 6 | 0.30102999 | 0.91219088 |            |
| chr11 | 82995386 | 83083730 | 88345  | 2 | 3 | 2 | 0.05670724 | 0.01053319 | 5 | 6 | 0.45545077 | 0.91219088 |            |
| chr11 | 83083730 | 83083789 | 60     | 1 | 4 | 2 | 0.11390336 | 0.01053319 | 5 | 6 | 0.30102999 | 0.91219088 |            |
| chr11 | 83083789 | 83193897 | 110109 | 4 | 3 | 2 | 0.05670724 | 0.01053319 | 5 | 6 | 0.45545077 | 0.91219088 |            |
| chr11 | 83193897 | 83269449 | 75553  | 1 | 3 | 1 | 0.05670724 | 0.00204627 | 5 | 6 | 0.45545077 | 1.31360226 |            |
| chr11 | 83269449 | 83537688 | 268240 | 7 | 3 | 2 | 0.05670724 | 0.01053319 | 5 | 6 | 0.45545077 | 0.91219088 |            |
| chr11 | 83537688 | 83537747 | 60     | 1 | 2 | 0 | 0.03070643 | 0.01053319 | 6 | 6 | 0.63695542 | 0.91219088 |            |
| chr11 | 83537747 | 83695388 | 157642 | 3 | 3 | 1 | 0.03070643 | 0.00204627 | 6 | 6 | 0.63695542 | 1.31360226 |            |
| chr11 | 83695388 | 83724570 | 29183  | 1 | 3 | 1 | 0.05670724 | 0.00204627 | 5 | 6 | 0.45545077 | 1.31360226 |            |
| chr11 | 83724570 | 83724629 | 60     | 1 | 2 | 2 | 0.05670724 | 0.01053319 | 5 | 6 | 0.45545077 | 0.91219088 |            |
| chr11 | 83724629 | 83952707 | 228079 | 4 | 3 | 1 | 0.05670724 | 0.00204627 | 5 | 6 | 0.45545077 | 1.31360226 |            |
| chr11 | 83952707 | 84003279 | 50573  | 2 | 3 | 1 | 0.05670724 | 0.00478973 | 5 | 5 | 0.45545077 | 1.02643191 |            |
| chr11 | 84003279 | 84003338 | 60     | 1 | 5 | 1 | 0.19510895 | 0.00204627 | 5 | 6 | 0.19510895 | 1.31360226 |            |
| chr11 | 84003338 | 84157984 | 154647 | 3 | 2 | 1 | 0.02162467 | 0.00204627 | 5 | 6 | 0.68214471 | 1.313602   |            |

|       |          |          |        |   |   |   |            |            |   |   |            |            |
|-------|----------|----------|--------|---|---|---|------------|------------|---|---|------------|------------|
| chr11 | 86219921 | 86317846 | 97926  | 2 | 3 | 1 | 0.03070643 | 0.02438896 | 6 | 3 | 0.63695542 | 0.51676182 |
| chr11 | 86317846 | 86374738 | 56893  | 2 | 3 | 1 | 0.01598258 | 0.02438896 | 7 | 3 | 0.84395715 | 0.51676182 |
| chr11 | 86374738 | 86512129 | 13792  | 3 | 3 | 1 | 0.05670724 | 0.02438896 | 5 | 3 | 0.45545077 | 0.51676182 |
| chr11 | 86512129 | 86586936 | 74808  | 1 | 3 | 1 | 0.05670724 | 0.05404976 | 5 | 2 | 0.45545077 | 0.30102999 |
| chr11 | 86586936 | 86665016 | 78081  | 3 | 3 | 0 | 0.05670724 | 0          | 5 | 2 | 0.45545077 | 0.61140001 |
| chr11 | 86665016 | 86978491 | 313476 | 6 | 2 | 0 | 0.0429175  | 0          | 4 | 2 | 0.47744371 | 0.61140001 |
| chr11 | 86978491 | 87144475 | 165985 | 2 | 2 | 0 | 0.08289318 | 0          | 3 | 1 | 0.30102999 | 0.30102999 |
| chr11 | 87144475 | 87144534 | 60     | 1 | 2 | 0 | 0.0429175  | 0          | 4 | 2 | 0.47744371 | 0.61140001 |
| chr11 | 87144534 | 87324690 | 180157 | 1 | 2 | 0 | 0.0429175  | 0          | 4 | 1 | 0.47744371 | 0.30102999 |
| chr11 | 87324690 | 87450865 | 126176 | 2 | 2 | 0 | 0.02162467 | 0          | 5 | 1 | 0.68214471 | 0.30102999 |
| chr11 | 87450865 | 87547184 | 96320  | 2 | 2 | 0 | 0.01053319 | 0          | 6 | 2 | 0.91219088 | 0.61140001 |
| chr11 | 87547184 | 87785796 | 238613 | 1 | 2 | 0 | 0.08289318 | 0          | 3 | 2 | 0.30102999 | 0.61140001 |
| chr11 | 87785796 | 87846529 | 60734  | 2 | 2 | 0 | 0.08289318 | 0          | 3 | 2 | 0.30102999 | 0.93173516 |
| chr11 | 87846529 | 87850595 | 4067   | 2 | 1 | 1 | 0.0429175  | 0.02438896 | 4 | 3 | 0.47744371 | 0.51676182 |
| chr11 | 87850595 | 87898185 | 47591  | 1 | 2 | 1 | 0.08289318 | 0.02438896 | 3 | 3 | 0.30102999 | 0.51676182 |
| chr11 | 87898185 | 88027109 | 128925 | 2 | 2 | 0 | 0.08289318 | 0          | 3 | 3 | 0.30102999 | 0.93173516 |
| chr11 | 88027109 | 88240997 | 213889 | 4 | 3 | 0 | 0.17593012 | 0          | 3 | 3 | 0.17593012 | 0.93173516 |
| chr11 | 88240997 | 88330392 | 89996  | 3 | 3 | 0 | 0.10122019 | 0          | 4 | 4 | 0.30102999 | 1.26272838 |
| chr11 | 88330392 | 88330451 | 60     | 1 | 3 | 0 | 0.10122019 | 0          | 4 | 5 | 0.30102999 | 1.60515106 |
| chr11 | 88330451 | 88360654 | 30204  | 3 | 3 | 0 | 0.10122019 | 0          | 4 | 4 | 0.30102999 | 1.26272838 |
| chr11 | 88360654 | 88609661 | 330008 | 6 | 3 | 0 | 0.10122019 | 0          | 3 | 3 | 0.30102999 | 0.93173516 |
| chr11 | 88609661 | 88758610 | 67950  | 2 | 3 | 0 | 0.10122019 | 0          | 4 | 4 | 0.30102999 | 1.26272838 |
| chr11 | 88758610 | 88903042 | 144433 | 2 | 3 | 0 | 0.17593012 | 0          | 3 | 3 | 0.17593012 | 0.93173516 |
| chr11 | 88903042 | 88961025 | 57984  | 2 | 4 | 0 | 0.18734596 | 0          | 4 | 3 | 0.18734596 | 0.93173516 |
| chr11 | 88961025 | 89014982 | 53958  | 2 | 4 | 0 | 0.18734596 | 0          | 4 | 3 | 0.18734596 | 1.60515106 |
| chr11 | 89014982 | 89177368 | 162387 | 4 | 4 | 1 | 0.18734596 | 0.00478973 | 4 | 5 | 0.18734596 | 1.02643191 |
| chr11 | 89177368 | 89223489 | 46122  | 2 | 4 | 1 | 0.18734596 | 0.01091641 | 4 | 4 | 0.18734596 | 0.76005302 |
| chr11 | 89223489 | 89223548 | 60     | 1 | 4 | 1 | 0.18734596 | 0.00478973 | 4 | 5 | 0.18734596 | 1.02643191 |
| chr11 | 89235488 | 89346831 | 123284 | 1 | 4 | 0 | 0.30102999 | 0          | 3 | 5 | 0.10122019 | 1.60515106 |
| chr11 | 89346831 | 89404085 | 57255  | 0 | 4 | 0 | 0.47744371 | 0          | 2 | 5 | 0.0429175  | 1.60515106 |
| chr11 | 89404085 | 89466583 | 62499  | 4 | 0 | 0 | 0.47744371 | 0          | 2 | 4 | 0.0429175  | 1.26272838 |
| chr11 | 89466583 | 89655866 | 189284 | 1 | 3 | 0 | 0.30102999 | 0          | 2 | 4 | 0.08289318 | 1.26272838 |
| chr11 | 89655866 | 89655925 | 60     | 1 | 3 | 1 | 0.17593012 | 0.01091641 | 3 | 4 | 0.17593012 | 0.76005302 |
| chr11 | 89655925 | 89885908 | 229984 | 2 | 3 | 0 | 0.17593012 | 0          | 3 | 4 | 0.17593012 | 1.26272838 |
| chr11 | 89885908 | 89954996 | 69089  | 3 | 2 | 0 | 0.1575501  | 0          | 2 | 3 | 0.1575501  | 0.93173516 |
| chr11 | 89954996 | 89956504 | 1509   | 2 | 3 | 0 | 0.17593012 | 0          | 3 | 4 | 0.17593012 | 1.26272838 |
| chr11 | 89956504 | 90090388 | 133885 | 2 | 2 | 0 | 0.1575501  | 0          | 2 | 3 | 0.1575501  | 0.93173516 |
| chr11 | 90090388 | 90090447 | 60     | 1 | 2 | 1 | 0.1575501  | 0.01091641 | 2 | 4 | 0.1575501  | 0.76005302 |
| chr11 | 90090447 | 90569659 | 479213 | 3 | 2 | 0 | 0.1575501  | 0          | 2 | 3 | 0.1575501  | 0.93173516 |
| chr11 | 90569659 | 90629499 | 59841  | 3 | 2 | 1 | 0.1575501  | 0.02438896 | 2 | 3 | 0.1575501  | 0.51676182 |
| chr11 | 90629499 | 90851187 | 221689 | 1 | 1 | 1 | 0.05404976 | 0.02438896 | 2 | 3 | 0.30102999 | 0.51676182 |
| chr11 | 90851187 | 90941251 | 90065  | 1 | 1 | 1 | 0.05404976 | 0          | 2 | 2 | 0.30102999 | 0.61140001 |
| chr11 | 90941251 | 90941310 | 60     | 1 | 3 | 0 | 0.30102999 | 0          | 2 | 2 | 0.08289318 | 0.61140001 |
| chr11 | 90941310 | 91344721 | 403412 | 2 | 0 | 0 | 0          | 0          | 0 | 1 | 0          | 0.30102999 |
| chr11 | 91344721 | 91565235 | 220515 | 2 | 1 | 0 | 0.1218695  | 0          | 1 | 1 | 0.1218695  | 0.30102999 |
| chr11 | 91565235 | 91657662 | 92428  | 2 | 1 | 0 | 0.30102999 | 0.05404976 | 1 | 2 | 0.05404976 | 0.30102999 |
| chr11 | 91657662 | 91657721 | 60     | 1 | 3 | 1 | 0.51676182 | 0.05404976 | 1 | 2 | 0.02438896 | 0.30102999 |
| chr11 | 91657721 | 91833562 | 175842 | 1 | 3 | 1 | 0.93173516 | 0.05404976 | 0 | 2 | 0          | 0.30102999 |
| chr11 | 91833562 | 91833621 | 60     | 1 | 3 | 1 | 0.93173516 | 0.02438896 | 0 | 3 | 0          | 0.51676182 |
| chr11 | 91833621 | 92016730 | 183110 | 1 | 2 | 0 | 0.61140001 | 0.02438896 | 0 | 3 | 0          | 0.51676182 |
| chr11 | 92016730 | 92125358 | 108629 | 2 | 2 | 1 | 0.61140001 | 0.00478973 | 0 | 5 | 0          | 1.02643191 |
| chr11 | 92125358 | 92189620 | 64263  | 2 | 2 | 1 | 0.08289318 | 8.47E-04   | 3 | 7 | 0.30102999 | 1.62048027 |
| chr11 | 92189620 | 92293847 | 104228 | 2 | 2 | 1 | 0.1575501  | 8.47E-04   | 2 | 7 | 0.1575501  | 1.62048027 |
| chr11 | 92293847 | 92343682 | 49836  | 2 | 2 | 1 | 0.08289318 | 8.47E-04   | 3 | 7 | 0.30102999 | 1.62048027 |
| chr11 | 92343682 | 92532149 | 188468 | 4 | 2 | 1 | 0.1575501  | 8.47E-04   | 2 | 7 | 0.1575501  | 1.62048027 |
| chr11 | 92532149 | 92624590 | 92442  | 3 | 3 | 1 | 0.17593012 | 8.47E-04   | 3 | 7 | 0.17593012 | 1.62048027 |
| chr11 | 92624590 | 92783972 | 159383 | 2 | 2 | 1 | 0.08289318 | 8.47E-04   | 3 | 7 | 0.30102999 | 1.62048027 |
| chr11 | 92783972 | 92784031 | 60     | 1 | 3 | 1 | 0.17593012 | 8.47E-04   | 3 | 7 | 0.17593012 | 1.62048027 |
| chr11 | 92784031 | 92924867 | 140837 | 3 | 3 | 1 | 0.17593012 | 0.00204627 | 3 | 6 | 0.17593012 | 1.31360226 |
| chr11 | 92924867 | 93065388 | 140522 | 3 | 3 | 1 | 0.17593012 | 8.47E-04   | 3 | 6 | 0.17593012 | 1.62048027 |
| chr11 | 93065388 | 93097455 | 32068  | 2 | 3 | 1 | 0.10122019 | 8.47E-04   | 4 | 7 | 0.30102999 | 1.62048027 |
| chr11 | 93097455 | 93170758 | 73304  | 3 | 2 | 1 | 0.08289318 | 8.47E-04   | 3 | 7 | 0.30102999 | 1.62048027 |
| chr11 | 93170758 | 93268533 | 97776  | 3 | 3 | 1 | 0.17593012 | 8.47E-04   | 3 | 7 | 0.17593012 | 1.62048027 |
| chr11 | 93268533 | 93294575 | 26943  | 2 | 4 | 1 | 0.11390336 | 8.47E-04   | 7 | 7 | 0.30102999 | 1.62048027 |
| chr11 | 93294575 | 93294739 | 229965 | 6 | 5 | 1 | 0.11390336 | 0.00204627 | 5 | 6 | 0.30102999 | 1.31360226 |
| chr11 | 93294739 | 93540074 | 18636  | 2 | 5 | 1 | 0.19510895 | 0.00204627 | 6 | 6 | 0.19510895 | 1.31360226 |
| chr11 | 93540074 | 93814103 | 374030 | 8 | 5 | 1 | 0.12309572 | 0.00204627 | 6 | 6 | 0.30102999 | 1.31360226 |
| chr11 | 93814103 | 94057525 | 143423 | 2 | 5 | 1 | 0.19510895 | 0.00204627 | 5 | 6 | 0.19510895 | 1.31360226 |
| chr11 | 94057525 | 94111573 | 54049  | 4 | 4 | 1 | 0.12309572 | 0.00204627 | 6 | 6 | 0.30102999 | 1.31360226 |
| chr11 | 94111573 | 94212820 | 101248 | 4 | 4 | 1 | 0.11390336 | 0.00204627 | 5 | 6 | 0.30102999 | 1.31360226 |
| chr11 | 94212820 | 94230159 | 17340  | 2 | 5 | 1 | 0.12309572 | 0.00204627 | 6 | 6 | 0.30102999 | 1.31360226 |
| chr11 | 94230159 | 94278998 | 48840  | 2 | 5 | 1 | 0.19510895 | 0.00204627 | 5 | 6 | 0.19510895 | 1.31360226 |
| chr11 | 94278998 | 94301888 | 22891  | 2 | 5 | 1 | 0.12309572 | 0.00204627 | 6 | 6 | 0.30102999 | 1.31360226 |
| chr11 | 94301888 | 94354534 | 52647  | 5 | 2 | 2 | 0.12309572 | 0.01053319 | 6 | 6 | 0.30102999 | 0.91219088 |
| chr11 | 94354534 | 94532550 | 178017 | 5 | 5 | 1 | 0.12309572 | 0.00204627 | 6 | 6 | 0.30102999 | 1.31360226 |
| chr11 | 94532550 | 94532602 | 53     | 1 | 5 | 2 | 0.12309572 | 0.01053319 | 6 | 6 | 0.30102999 | 0.91219088 |
| chr11 | 94532602 | 94563187 | 30586  | 1 | 4 | 2 | 0.11390336 | 0.01053319 | 5 | 6 | 0.30102999 | 0.91219088 |
| chr11 | 94563187 | 94604015 | 40829  | 2 | 4 | 3 | 0.11390336 | 0.03070643 | 5 | 6 | 0.30102999 | 0.63695542 |
| chr11 | 94604015 | 94604074 | 60     | 1 | 3 | 3 | 0.06713722 | 0.03070643 | 6 | 6 | 0.44141547 | 0.63695542 |
| chr11 | 94604074 | 94705730 | 101657 | 2 | 4 | 2 | 0.06713722 | 0.01053319 | 6 | 6 | 0.44141547 | 0.91219088 |
| chr11 | 94705730 | 94801415 | 95686  | 3 | 4 | 3 | 0.06713722 | 0.03070643 | 6 | 6 | 0.44141547 | 0.63695542 |
| chr11 | 94801415 | 94801474 | 60     | 1 | 5 | 3 | 0.12309572 | 0.01598258 | 6 | 7 | 0.30102999 | 0.84395715 |
| chr11 | 94801474 | 94838253 | 36780  | 1 | 5 | 2 | 0.12309572 | 0.00493743 | 6 | 7 | 0.30102999 | 1.16581773 |
| chr11 | 94838253 | 94926706 | 88454  | 2 | 5 | 1 | 0.12309572 | 8.47E-04   | 6 | 7 | 0.30102999 | 1.62048027 |
| chr11 | 94926706 | 95086530 | 159825 | 3 | 5 | 1 | 0.12309572 | 0.00204627 | 6 | 6 | 0.30102999 | 1.31360226 |
| chr11 | 95086530 | 95502376 | 415847 | 5 | 5 | 2 | 0.12309572 | 0.01053319 | 6 | 6 | 0.30102999 | 0.91219088 |
| chr11 | 95502376 | 95555141 | 52766  | 2 | 5 | 2 | 0.12309572 | 0.02162467 | 6 | 6 | 0.30102999 | 0.68214471 |
| chr11 | 95555141 | 95591810 | 36670  | 4 | 5 | 3 | 0.12309572 | 0.05670724 | 6 | 5 | 0.30102999 | 0.45545077 |
| chr11 | 95591810 | 95692390 | 100581 | 3 | 5 | 2 | 0.12309572 | 0.02162467 | 6 | 5 | 0.30102999 | 0.68214471 |
| chr11 | 95692390 | 95711854 | 19465  | 2 | 5 | 3 | 0.12309572 | 0.05670724 | 6 | 5 | 0.30102999 | 0.45545077 |
| chr11 | 95711854 | 95826861 | 115008 | 3 | 5 | 2 | 0.12309572 | 0.02162467 | 6 | 5 | 0.30102999 | 0.68214471 |
| chr11 | 95826861 | 95874545 | 47685  | 1 | 5 | 2 | 0.19510895 | 0.021624   |   |   |            |            |

|       |           |           |        |   |   |            |            |            |   |            |            |            |
|-------|-----------|-----------|--------|---|---|------------|------------|------------|---|------------|------------|------------|
| chr11 | 100666015 | 100713156 | 47142  | 1 | 0 | 3          | 0          | 0.01598258 | 2 | 7          | 0.61140001 | 0.84395715 |
| chr11 | 100713156 | 100786016 | 72861  | 1 | 0 | 3          | 0          | 0.03070643 | 2 | 6          | 0.61140001 | 0.63695542 |
| chr11 | 100786016 | 100786075 | 60     | 1 | 0 | 4          | 0          | 0.03812622 | 2 | 7          | 0.61140001 | 0.60763643 |
| chr11 | 100786075 | 100845021 | 58947  | 1 | 0 | 3          | 0          | 0.01598258 | 2 | 7          | 0.61140001 | 0.84395715 |
| chr11 | 100845021 | 100845080 | 60     | 1 | 1 | 4          | 0.05404976 | 0.02074938 | 2 | 8          | 0.30102999 | 0.79906872 |
| chr11 | 100845080 | 100909288 | 64209  | 2 | 1 | 3          | 0.05404976 | 0.0079614  | 2 | 6          | 0.30102999 | 1.07548421 |
| chr11 | 100909288 | 100917864 | 8577   | 1 | 1 | 3          | 0.05404976 | 0.03070643 | 2 | 6          | 0.30102999 | 0.63695542 |
| chr11 | 100917864 | 100949346 | 31483  | 1 | 1 | 3          | 0.05404976 | 0.05670724 | 2 | 5          | 0.30102999 | 0.45545077 |
| chr11 | 100949346 | 100949405 | 60     | 1 | 1 | 3          | 0.02438896 | 0.05670724 | 3 | 5          | 0.51676182 | 0.45545077 |
| chr11 | 100949405 | 101000675 | 51271  | 1 | 1 | 2          | 0.02438896 | 0.02162467 | 3 | 5          | 0.51676182 | 0.68214471 |
| chr11 | 101000675 | 101024341 | 23667  | 2 | 1 | 3          | 0.02438896 | 0.03070643 | 3 | 6          | 0.51676182 | 0.63695542 |
| chr11 | 101024341 | 101127880 | 103540 | 1 | 1 | 2          | 0.02438896 | 0.01053319 | 3 | 6          | 0.51676182 | 0.91219088 |
| chr11 | 101127880 | 101127939 | 60     | 1 | 2 | 4          | 0.08289118 | 0.03812622 | 3 | 7          | 0.30102999 | 0.60763643 |
| chr11 | 101127939 | 101323715 | 195777 | 1 | 2 | 3          | 0.08289118 | 0.01598258 | 3 | 7          | 0.30102999 | 0.84395715 |
| chr11 | 101323715 | 101374792 | 51078  | 3 | 3 | 5          | 0.10122019 | 0.07511598 | 4 | 7          | 0.30102999 | 0.43181735 |
| chr11 | 101374792 | 101563332 | 188541 | 2 | 2 | 5          | 0.08289118 | 0.12309572 | 3 | 6          | 0.30102999 | 0.30102999 |
| chr11 | 101563332 | 101659057 | 95726  | 2 | 2 | 5          | 0.0429175  | 0.12309572 | 4 | 6          | 0.30102999 | 0.30102999 |
| chr11 | 101659057 | 101659116 | 60     | 1 | 3 | 8          | 0.05670724 | 0.30102999 | 5 | 7          | 0.45545077 | 0.13499366 |
| chr11 | 101659116 | 101761480 | 102655 | 1 | 3 | 5          | 0.05670724 | 0.12309572 | 5 | 6          | 0.45545077 | 0.30102999 |
| chr11 | 101761480 | 101765744 | 4265   | 2 | 4 | 6          | 0.06713722 | 0.20064824 | 6 | 6          | 0.44141547 | 0.20064824 |
| chr11 | 101765744 | 101786833 | 21090  | 2 | 4 | 6          | 0.06713722 | 0.30102999 | 6 | 5          | 0.44141547 | 0.12309572 |
| chr11 | 101786833 | 101857794 | 70562  | 2 | 4 | 7          | 0.06713722 | 0.20468098 | 6 | 7          | 0.44141547 | 0.20468098 |
| chr11 | 101857794 | 101987284 | 129491 | 3 | 4 | 5          | 0.06713722 | 0.07511598 | 6 | 7          | 0.44141547 | 0.43181735 |
| chr11 | 101987284 | 102080256 | 92973  | 2 | 3 | 4          | 0.03070643 | 0.06713722 | 6 | 6          | 0.63695542 | 0.44141547 |
| chr11 | 102080256 | 102125285 | 45300  | 3 | 3 | 5          | 0.03070643 | 0.12309572 | 6 | 6          | 0.63695542 | 0.30102999 |
| chr11 | 102125285 | 102125344 | 60     | 1 | 7 | 0          | 0.03070643 | 0.30102999 | 6 | 6          | 0.63695542 | 0.129913   |
| chr11 | 102125344 | 102268518 | 143175 | 8 | 3 | 6          | 0.03070643 | 0.20064824 | 6 | 6          | 0.63695542 | 0.20064824 |
| chr11 | 102268518 | 102297802 | 29285  | 1 | 3 | 6          | 0.03070643 | 0.30102999 | 6 | 6          | 0.63695542 | 0.12309572 |
| chr11 | 102297802 | 102319527 | 21726  | 2 | 3 | 7          | 0.03070643 | 0.43181735 | 6 | 5          | 0.63695542 | 0.07511598 |
| chr11 | 102319527 | 102369773 | 50247  | 2 | 3 | 7          | 0.03070643 | 0.30102999 | 6 | 6          | 0.63695542 | 0.129913   |
| chr11 | 102369773 | 102369832 | 60     | 1 | 3 | 8          | 0.03070643 | 0.4250187  | 6 | 6          | 0.63695542 | 0.08122616 |
| chr11 | 102369832 | 102391461 | 21630  | 2 | 2 | 8          | 0.01053319 | 0.58747015 | 6 | 5          | 0.91219088 | 0.04407651 |
| chr11 | 102391461 | 102395665 | 4205   | 2 | 3 | 8          | 0.03070643 | 0.4250187  | 6 | 6          | 0.63695542 | 0.08122616 |
| chr11 | 102395665 | 102466901 | 71237  | 2 | 7 | 0.03070643 | 0.30102999 | 6          | 6 | 0.63695542 | 0.129913   |            |
| chr11 | 102466901 | 102494630 | 27730  | 1 | 3 | 5          | 0.03070643 | 0.12309572 | 6 | 6          | 0.63695542 | 0.30102999 |
| chr11 | 102494630 | 102562671 | 68042  | 2 | 3 | 6          | 0.03070643 | 0.20064824 | 6 | 6          | 0.63695542 | 0.20064824 |
| chr11 | 102562671 | 102645479 | 82809  | 2 | 3 | 6          | 0.03070643 | 0.30102999 | 6 | 5          | 0.63695542 | 0.12309572 |
| chr11 | 102645479 | 102651241 | 5763   | 3 | 3 | 6          | 0.03070643 | 0.20064824 | 6 | 6          | 0.63695542 | 0.20064824 |
| chr11 | 102651241 | 102755174 | 103934 | 7 | 3 | 5          | 0.03070643 | 0.12309572 | 6 | 6          | 0.63695542 | 0.30102999 |
| chr11 | 102755174 | 102815341 | 60168  | 2 | 3 | 4          | 0.03070643 | 0.06713722 | 6 | 6          | 0.63695542 | 0.44141547 |
| chr11 | 102815341 | 103106444 | 291104 | 6 | 3 | 4          | 0.03070643 | 0.11390336 | 5 | 5          | 0.63695542 | 0.30102999 |
| chr11 | 103106444 | 103124089 | 17646  | 3 | 5 | 0.03070643 | 0.19510895 | 6          | 5 | 0.63695542 | 0.19510895 |            |
| chr11 | 103124089 | 103191875 | 67787  | 2 | 3 | 4          | 0.03070643 | 0.11390336 | 6 | 5          | 0.63695542 | 0.30102999 |
| chr11 | 103191875 | 103306780 | 114906 | 3 | 2 | 4          | 0.01053319 | 0.11390336 | 6 | 5          | 0.91219088 | 0.30102999 |
| chr11 | 103306780 | 103339357 | 32578  | 1 | 2 | 4          | 0.01053319 | 0.18734596 | 6 | 4          | 0.91219088 | 0.18734596 |
| chr11 | 103339357 | 103620440 | 281084 | 2 | 2 | 2          | 0.01053319 | 0.08289118 | 6 | 3          | 0.30102999 | 0.30102999 |
| chr11 | 103620440 | 103829655 | 209216 | 2 | 1 | 0          | 0.01091641 | 0          | 4 | 2          | 0.76005302 | 0.61140001 |
| chr11 | 103829655 | 103914833 | 85179  | 3 | 1 | 0          | 0.00478973 | 0          | 5 | 3          | 1.02643191 | 0.93173516 |
| chr11 | 103914833 | 103955263 | 40431  | 1 | 1 | 0          | 0.01091641 | 0          | 4 | 3          | 0.76005302 | 0.93173516 |
| chr11 | 103955263 | 104050764 | 95502  | 3 | 1 | 2          | 0.01091641 | 0.0429175  | 4 | 4          | 0.76005302 | 0.47744371 |
| chr11 | 104050764 | 104050823 | 60     | 1 | 1 | 2          | 0.00478973 | 0.02162467 | 5 | 5          | 1.02643191 | 0.68214471 |
| chr11 | 104050823 | 104135377 | 84555  | 1 | 2 | 2          | 0.01091641 | 0.0429175  | 4 | 4          | 0.76005302 | 0.47744371 |
| chr11 | 104135377 | 104437152 | 301776 | 2 | 1 | 2          | 0.02438896 | 0.0429175  | 3 | 4          | 0.51676182 | 0.47744371 |
| chr11 | 104437152 | 104437211 | 60     | 1 | 2 | 3          | 0.08289118 | 0.10122019 | 3 | 4          | 0.30102999 | 0.30102999 |
| chr11 | 104437211 | 104757909 | 320699 | 1 | 3 | 3          | 0.02438896 | 0.10122019 | 3 | 4          | 0.51676182 | 0.30102999 |
| chr11 | 104757909 | 104820093 | 62185  | 4 | 2 | 4          | 0.08289118 | 0.11390336 | 3 | 5          | 0.30102999 | 0.30102999 |
| chr11 | 104820093 | 104869033 | 48941  | 1 | 2 | 3          | 0.08289118 | 0.10122019 | 3 | 4          | 0.30102999 | 0.30102999 |
| chr11 | 104869033 | 104962273 | 93241  | 4 | 2 | 3          | 0.0429175  | 0.10122019 | 4 | 4          | 0.47744371 | 0.30102999 |
| chr11 | 104962273 | 105068926 | 106654 | 4 | 2 | 4          | 0.0429175  | 0.11390336 | 5 | 5          | 0.47744371 | 0.30102999 |
| chr11 | 105068926 | 105068985 | 60     | 1 | 2 | 5          | 0.0429175  | 0.19510895 | 4 | 4          | 0.47744371 | 0.19510895 |
| chr11 | 105068985 | 105138232 | 69248  | 2 | 4 | 4          | 0.0429175  | 0.18734596 | 4 | 4          | 0.47744371 | 0.18734596 |
| chr11 | 105138232 | 105252612 | 114381 | 3 | 2 | 4          | 0.0429175  | 0.11390336 | 4 | 4          | 0.47744371 | 0.30102999 |
| chr11 | 105252612 | 105252671 | 60     | 1 | 2 | 5          | 0.0429175  | 0.19510895 | 4 | 4          | 0.47744371 | 0.19510895 |
| chr11 | 105252671 | 105510858 | 258188 | 3 | 2 | 4          | 0.0429175  | 0.19510895 | 4 | 5          | 0.47744371 | 0.30102999 |
| chr11 | 105510858 | 105510917 | 60     | 1 | 2 | 4          | 0.0429175  | 0.19510895 | 4 | 5          | 0.47744371 | 0.19510895 |
| chr11 | 105510917 | 105551988 | 51072  | 1 | 2 | 5          | 0.08289118 | 0.19510895 | 3 | 5          | 0.30102999 | 0.19510895 |
| chr11 | 105551988 | 105623705 | 61718  | 2 | 2 | 6          | 0.08289118 | 0.30102999 | 3 | 3          | 0.30102999 | 0.12309572 |
| chr11 | 105623705 | 105623763 | 59     | 1 | 3 | 6          | 0.05670724 | 0.30102999 | 5 | 5          | 0.45545077 | 0.12309572 |
| chr11 | 105623763 | 105730621 | 106859 | 2 | 2 | 3          | 0.10122019 | 0.19510895 | 5 | 4          | 0.30102999 | 0.19510895 |
| chr11 | 105730621 | 105730680 | 60     | 1 | 3 | 5          | 0.03070643 | 0.19510895 | 6 | 5          | 0.63695542 | 0.19510895 |
| chr11 | 105730680 | 105850492 | 119813 | 2 | 3 | 5          | 0.10122019 | 0.19510895 | 4 | 5          | 0.30102999 | 0.19510895 |
| chr11 | 105850492 | 105922488 | 71997  | 1 | 3 | 5          | 0.51676182 | 0.19510895 | 1 | 5          | 0.02438896 | 0.19510895 |
| chr11 | 105922488 | 105947397 | 24910  | 2 | 3 | 5          | 0.51676182 | 0.30102999 | 2 | 1          | 0.02438896 | 0.11390336 |
| chr11 | 105947397 | 105961442 | 14046  | 2 | 3 | 5          | 0.51676182 | 0.19510895 | 1 | 5          | 0.02438896 | 0.19510895 |
| chr11 | 105961442 | 105961501 | 60     | 1 | 3 | 5          | 0.30102999 | 0.19510895 | 2 | 5          | 0.08289118 | 0.19510895 |
| chr11 | 105961501 | 106031011 | 69511  | 1 | 2 | 3          | 0.30102999 | 0.05670724 | 1 | 5          | 0.05404976 | 0.45545077 |
| chr11 | 106031011 | 106267255 | 236245 | 1 | 2 | 2          | 0.30102999 | 0.1575501  | 1 | 2          | 0.05404976 | 0.1575501  |
| chr11 | 106267255 | 106267314 | 60     | 1 | 2 | 2          | 0.1575501  | 0.1575501  | 2 | 2          | 0.1575501  | 0.1575501  |
| chr11 | 106267314 | 106493972 | 226659 | 1 | 2 | 2          | 0.1575501  | 0.30102999 | 2 | 1          | 0.1575501  | 0.05404976 |
| chr11 | 106493972 | 106557833 | 63862  | 2 | 2 | 2          | 0.1575501  | 0.08289118 | 3 | 3          | 0.1575501  | 0.30102999 |
| chr11 | 106557833 | 106558195 | 363    | 2 | 2 | 2          | 0.08289118 | 0.0429175  | 3 | 4          | 0.30102999 | 0.47744371 |
| chr11 | 106558195 | 106617145 | 58951  | 1 | 2 | 2          | 0.1575501  | 0.1575501  | 2 | 2          | 0.1575501  | 0.1575501  |
| chr11 | 106617145 | 106681146 | 64002  | 2 | 2 | 3          | 0.1575501  | 0.30102999 | 2 | 2          | 0.1575501  | 0.08289118 |
| chr11 | 106681146 | 106681205 | 60     | 1 | 2 | 4          | 0.1575501  | 0.30102999 | 3 | 3          | 0.1575501  | 0.10122019 |
| chr11 | 106681205 | 106737199 | 55995  | 1 | 2 | 3          | 0.1575501  | 0.30102999 | 2 | 2          | 0.1575501  | 0.08289118 |
| chr11 | 106737199 | 106810465 | 73267  | 2 | 2 | 2          | 0.1575501  | 0.1575501  | 2 | 2          | 0.1575501  | 0.1575501  |
| chr11 | 106810465 | 106810524 | 60     | 1 | 2 | 2          | 0.08289118 | 0.1575501  | 3 | 2          | 0.30102999 | 0.1575501  |
| chr11 | 106810524 | 106874508 | 63985  | 1 | 2 | 2          | 0.1575501  | 0.1575501  | 2 | 2          | 0.1575501  | 0.1575501  |
| chr11 | 106874508 | 106959465 | 84958  | 2 | 2 | 2          | 0.1575501  | 0.05404976 | 2 | 2</        |            |            |

|       |           |           |        |    |   |   |            |            |   |   |            |            |
|-------|-----------|-----------|--------|----|---|---|------------|------------|---|---|------------|------------|
| chr11 | 110404638 | 110404697 | 60     | 1  | 2 | 1 | 0.08289318 | 0.05404976 | 3 | 2 | 0.30102999 | 0.30102999 |
| chr11 | 110404697 | 110508203 | 103507 | 3  | 2 | 1 | 0.08289318 | 0.1218695  | 3 | 1 | 0.30102999 | 0.1218695  |
| chr11 | 110508203 | 110564363 | 56161  | 1  | 2 | 0 | 0.08289318 | 0          | 3 | 1 | 0.30102999 | 0.30102999 |
| chr11 | 110564363 | 110772180 | 207818 | 3  | 2 | 0 | 0.0429175  | 0          | 4 | 2 | 0.47744371 | 0.61140001 |
| chr11 | 110772180 | 110846327 | 74148  | 2  | 2 | 1 | 0.01053319 | 0.05404976 | 6 | 2 | 0.91219088 | 0.30102999 |
| chr11 | 110846327 | 110967252 | 120926 | 2  | 2 | 2 | 0.01053319 | 0.1575501  | 6 | 2 | 0.91219088 | 0.1575501  |
| chr11 | 110967252 | 110967311 | 60     | 1  | 2 | 2 | 0.00221948 | 0.08289318 | 8 | 3 | 1.44210395 | 0.30102999 |
| chr11 | 110967311 | 111137190 | 169880 | 1  | 2 | 1 | 0.00221948 | 0.05404976 | 8 | 2 | 1.44210395 | 0.30102999 |
| chr11 | 111137190 | 111171889 | 34700  | 2  | 2 | 1 | 9.54E-04   | 0.05404976 | 9 | 2 | 1.74076927 | 0.30102999 |
| chr11 | 111171889 | 111249253 | 77365  | 4  | 2 | 2 | 9.54E-04   | 0.08289318 | 9 | 3 | 1.74076927 | 0.30102999 |
| chr11 | 111249253 | 111386795 | 137543 | 2  | 2 | 2 | 9.54E-04   | 0.1575501  | 9 | 2 | 1.74076927 | 0.1575501  |
| chr11 | 111386795 | 111465924 | 79130  | 2  | 2 | 2 | 0.00221948 | 0.1575501  | 8 | 2 | 1.44210395 | 0.1575501  |
| chr11 | 111465924 | 111465983 | 60     | 1  | 2 | 2 | 9.54E-04   | 0.1575501  | 9 | 2 | 1.74076927 | 0.1575501  |
| chr11 | 111465983 | 111612172 | 146190 | 2  | 1 | 1 | 9.54E-04   | 0.05404976 | 9 | 2 | 1.74076927 | 0.30102999 |
| chr11 | 111612172 | 111756483 | 144312 | 7  | 2 | 1 | 9.54E-04   | 0.1575501  | 9 | 2 | 1.74076927 | 0.1575501  |
| chr11 | 111756483 | 111846294 | 89812  | 4  | 2 | 2 | 0.00221948 | 0.1575501  | 8 | 2 | 1.44210395 | 0.1575501  |
| chr11 | 111846294 | 111846353 | 60     | 1  | 2 | 2 | 9.54E-04   | 0.08289318 | 9 | 3 | 1.74076927 | 0.30102999 |
| chr11 | 111846353 | 111941226 | 94874  | 4  | 2 | 2 | 0.00221948 | 0.08289318 | 8 | 3 | 1.44210395 | 0.30102999 |
| chr11 | 111941226 | 112085865 | 144640 | 10 | 2 | 2 | 0.00493743 | 0.1575501  | 7 | 2 | 1.16581773 | 0.1575501  |
| chr11 | 112085865 | 112093800 | 13516  | 2  | 2 | 2 | 0.00493743 | 0.08289318 | 7 | 2 | 1.16581773 | 0.30102999 |
| chr11 | 112093800 | 112168030 | 58551  | 2  | 2 | 2 | 0.00493743 | 0.1575501  | 7 | 2 | 1.16581773 | 0.1575501  |
| chr11 | 112168030 | 112375293 | 207264 | 4  | 2 | 2 | 0.00493743 | 0.08289318 | 7 | 2 | 1.16581773 | 0.30102999 |
| chr11 | 112375293 | 112440131 | 64839  | 2  | 2 | 2 | 0.00493743 | 0.1575501  | 7 | 2 | 1.16581773 | 0.1575501  |
| chr11 | 112440131 | 112499131 | 59001  | 1  | 2 | 1 | 0.00493743 | 0.05404976 | 7 | 2 | 1.16581773 | 0.30102999 |
| chr11 | 112499131 | 112563267 | 64137  | 2  | 2 | 1 | 0.00493743 | 0.02438896 | 7 | 3 | 1.16581773 | 0.51676182 |
| chr11 | 112563267 | 112563326 | 60     | 1  | 2 | 2 | 0.00493743 | 0.08289318 | 7 | 3 | 1.16581773 | 0.30102999 |
| chr11 | 112563326 | 112879364 | 316039 | 3  | 2 | 2 | 0.02162467 | 0.1575501  | 5 | 2 | 0.68214471 | 0.1575501  |
| chr11 | 112879364 | 112879423 | 60     | 1  | 2 | 3 | 0.02162467 | 0.30102999 | 5 | 2 | 0.68214471 | 0.08289318 |
| chr11 | 112879423 | 112942002 | 62580  | 1  | 1 | 2 | 0.00478973 | 0.1575501  | 5 | 1 | 1.02643191 | 0.1575501  |
| chr11 | 112942002 | 113000227 | 58226  | 1  | 1 | 1 | 0.00478973 | 0.1218695  | 5 | 1 | 1.02643191 | 0.1218695  |
| chr11 | 113000227 | 113111526 | 111300 | 2  | 1 | 1 | 0.02438896 | 0.1218695  | 3 | 1 | 0.51676182 | 0.1218695  |
| chr11 | 113111526 | 113111579 | 54     | 1  | 3 | 3 | 0.02438896 | 0.51676182 | 3 | 1 | 0.51676182 | 0.02438896 |
| chr11 | 113111579 | 113186964 | 75386  | 4  | 1 | 3 | 0.05404976 | 0.51676182 | 2 | 1 | 0.30102999 | 0.02438896 |
| chr11 | 113186964 | 113236999 | 50036  | 3  | 1 | 3 | 0.05404976 | 0.30102999 | 2 | 2 | 0.30102999 | 0.08289318 |
| chr11 | 113236999 | 113293362 | 56364  | 3  | 1 | 4 | 0.02438896 | 0.47744371 | 3 | 2 | 0.51676182 | 0.0429175  |
| chr11 | 113293362 | 113475281 | 181920 | 3  | 1 | 3 | 0.02438896 | 0.30102999 | 3 | 2 | 0.51676182 | 0.08289318 |
| chr11 | 113475281 | 113475340 | 60     | 1  | 1 | 4 | 0.02438896 | 0.18734596 | 3 | 4 | 0.51676182 | 0.18734596 |
| chr11 | 113475340 | 113523276 | 47937  | 1  | 1 | 4 | 0.02438896 | 0.30102999 | 3 | 3 | 0.51676182 | 0.10122019 |
| chr11 | 113523276 | 113566108 | 42833  | 1  | 1 | 3 | 0.02438896 | 0.17593012 | 3 | 3 | 0.51676182 | 0.17593012 |
| chr11 | 113566108 | 113612431 | 46324  | 2  | 1 | 3 | 0.02438896 | 0.10122019 | 3 | 4 | 0.51676182 | 0.30102999 |
| chr11 | 113612431 | 113639596 | 27166  | 2  | 1 | 4 | 0.02438896 | 0.18734596 | 3 | 4 | 0.51676182 | 0.18734596 |
| chr11 | 113639596 | 113856922 | 217327 | 8  | 1 | 3 | 0.02438896 | 0.17593012 | 3 | 3 | 0.51676182 | 0.17593012 |
| chr11 | 113856922 | 113955796 | 98875  | 2  | 1 | 3 | 0.05404976 | 0.17593012 | 3 | 3 | 0.30102999 | 0.17593012 |
| chr11 | 113955796 | 113976501 | 20706  | 2  | 1 | 3 | 0.02438896 | 0.10122019 | 3 | 4 | 0.51676182 | 0.30102999 |
| chr11 | 113976501 | 114030160 | 53660  | 2  | 1 | 3 | 0.05404976 | 0.17593012 | 2 | 3 | 0.30102999 | 0.17593012 |
| chr11 | 114030160 | 114130573 | 100414 | 3  | 1 | 2 | 0.05404976 | 0.08289318 | 2 | 3 | 0.30102999 | 0.30102999 |
| chr11 | 114130573 | 114167383 | 36811  | 1  | 1 | 1 | 0.05404976 | 0.02438896 | 3 | 3 | 0.30102999 | 0.51676182 |
| chr11 | 114167383 | 114167442 | 60     | 1  | 2 | 2 | 0.05404976 | 0.08289318 | 2 | 3 | 0.30102999 | 0.30102999 |
| chr11 | 114167442 | 114269885 | 102444 | 1  | 1 | 2 | 0.05404976 | 0.1575501  | 3 | 2 | 0.30102999 | 0.1575501  |
| chr11 | 114269885 | 114316688 | 46804  | 2  | 2 | 2 | 0.02438896 | 0.1575501  | 3 | 2 | 0.51676182 | 0.1575501  |
| chr11 | 114316688 | 114316747 | 60     | 1  | 4 | 4 | 0.02438896 | 0.47744371 | 3 | 2 | 0.51676182 | 0.0429175  |
| chr11 | 114316747 | 114398562 | 81816  | 1  | 1 | 2 | 0.02438896 | 0.1575501  | 3 | 2 | 0.51676182 | 0.1575501  |
| chr11 | 114398562 | 114465471 | 66910  | 3  | 1 | 2 | 0.08289318 | 0.08289318 | 3 | 3 | 0.30102999 | 0.30102999 |
| chr11 | 114465471 | 114556533 | 91063  | 1  | 2 | 1 | 0.02438896 | 0.02438896 | 3 | 3 | 0.51676182 | 0.51676182 |
| chr11 | 114556533 | 114653661 | 97129  | 2  | 1 | 1 | 0.02438896 | 0.05404976 | 2 | 2 | 0.51676182 | 0.30102999 |
| chr11 | 114653661 | 114845534 | 191874 | 1  | 0 | 0 | 0          | 0          | 3 | 1 | 0.93173516 | 0.30102999 |
| chr11 | 114845534 | 115046874 | 201341 | 1  | 0 | 0 | 0          | 0          | 0 | 0 | 0.93173516 | 0          |
| chr11 | 115046874 | 115046933 | 60     | 1  | 0 | 0 | 0.01091641 | 0          | 4 | 0 | 0.76005302 | 0          |
| chr11 | 115046933 | 115109269 | 62337  | 3  | 1 | 0 | 0.02438896 | 0          | 0 | 0 | 0.51676182 | 0          |
| chr11 | 115109269 | 115141188 | 31920  | 2  | 2 | 0 | 0.0429175  | 0          | 4 | 0 | 0.47744371 | 0          |
| chr11 | 115141188 | 115186132 | 44945  | 2  | 2 | 0 | 0.02162467 | 0          | 5 | 0 | 0.68214471 | 0          |
| chr11 | 115186132 | 115287204 | 101073 | 2  | 0 | 0 | 0.0429175  | 0          | 4 | 0 | 0.47744371 | 0          |
| chr11 | 115287204 | 115334147 | 46944  | 3  | 2 | 0 | 0.08289318 | 0          | 3 | 0 | 0.30102999 | 0          |
| chr11 | 115334147 | 115394072 | 59926  | 3  | 2 | 0 | 0.02438896 | 0          | 0 | 0 | 0.47744371 | 0          |
| chr11 | 115394072 | 115518388 | 124317 | 1  | 1 | 0 | 0          | 0          | 3 | 0 | 0.51676182 | 0          |
| chr11 | 115518388 | 115561137 | 142750 | 2  | 1 | 0 | 0.02438896 | 0          | 3 | 1 | 0.51676182 | 0.30102999 |
| chr11 | 115561137 | 115915689 | 254553 | 1  | 1 | 1 | 0.02438896 | 0          | 3 | 3 | 0.51676182 | 0.1218695  |
| chr11 | 115915689 | 116053868 | 138180 | 2  | 1 | 1 | 0.01091641 | 0.1218695  | 4 | 1 | 0.76005302 | 0.1218695  |
| chr11 | 116053868 | 116053927 | 60     | 1  | 1 | 3 | 0.00478973 | 0.51676182 | 5 | 1 | 1.02643191 | 0.02438896 |
| chr11 | 116053927 | 116326867 | 272941 | 2  | 1 | 1 | 0.00478973 | 0.1218695  | 5 | 1 | 1.02643191 | 0.1218695  |
| chr11 | 116326867 | 116326926 | 60     | 1  | 2 | 1 | 0.02162467 | 0.1218695  | 5 | 1 | 0.68214471 | 0.1218695  |
| chr11 | 116326926 | 116462497 | 135572 | 1  | 2 | 1 | 0.0429175  | 0.30102999 | 4 | 0 | 0.47744371 | 0          |
| chr11 | 116462497 | 116623317 | 160821 | 2  | 2 | 3 | 0.0429175  | 0.30102999 | 4 | 2 | 0.47744371 | 0.08289318 |
| chr11 | 116623317 | 116655121 | 31805  | 3  | 3 | 3 | 0.05670724 | 0.17593012 | 5 | 3 | 0.45545077 | 0.17593012 |
| chr11 | 116655121 | 116660613 | 5493   | 2  | 3 | 3 | 0.05670724 | 0.03070643 | 6 | 6 | 0.45545077 | 0.63695542 |
| chr11 | 116660613 | 116728594 | 67982  | 2  | 3 | 3 | 0.05670724 | 0.05670724 | 5 | 5 | 0.45545077 | 0.45545077 |
| chr11 | 116728594 | 116746672 | 18079  | 3  | 3 | 3 | 0.05670724 | 0.10122019 | 5 | 4 | 0.45545077 | 0.30102999 |
| chr11 | 116746672 | 116796887 | 50216  | 2  | 3 | 3 | 0.05670724 | 0.05670724 | 5 | 5 | 0.45545077 | 0.45545077 |
| chr11 | 116796887 | 116824812 | 27926  | 2  | 3 | 3 | 0.05670724 | 0.03070643 | 5 | 6 | 0.45545077 | 0.63695542 |
| chr11 | 116824812 | 116884978 | 60167  | 1  | 3 | 3 | 0.05670724 | 0.05670724 | 5 | 5 | 0.45545077 | 0.45545077 |
| chr11 | 116884978 | 116934241 | 49264  | 3  | 3 | 3 | 0.05670724 | 0.10122019 | 5 | 4 | 0.45545077 | 0.30102999 |
| chr11 | 116934241 | 116973424 | 39184  | 1  | 3 | 3 | 0.05670724 | 0.17593012 | 5 | 3 | 0.45545077 | 0.17593012 |
| chr11 | 116973424 | 117015663 | 60     | 1  | 3 | 4 | 0.05670724 | 0.11390336 | 5 | 5 | 0.45545077 | 0.30102999 |
| chr11 | 117015663 | 117051076 | 42181  | 1  | 3 | 3 | 0.05670724 | 0.05670724 | 5 | 5 | 0.45545077 | 0.45545077 |
| chr11 | 117051076 | 117067450 | 35414  | 3  | 3 | 3 | 0.05670724 | 0.01598258 | 5 | 7 | 0.45545077 | 0.84395715 |
| chr11 | 117067450 | 117067496 | 16375  | 1  | 3 | 3 | 0.05670724 | 0.03070643 | 5 | 6 | 0.45545077 | 0.63695542 |
| chr11 | 117067496 | 117101118 | 47     | 1  | 3 | 4 | 0.05670724 | 0.06713722 | 5 | 6 | 0.45545077 | 0.44141547 |
| chr11 | 117101118 | 117101170 | 33623  | 3  | 3 | 3 | 0.05670724 | 0.03070643 | 5 | 6 | 0.45545077 | 0.63695542 |
| chr11 | 117101170 | 117182655 | 53     | 1  | 4 | 3 | 0.05670724 | 0.03812622 | 5 | 7 | 0.45545077 | 0.60763643 |
| chr11 | 117182655 | 117209339 | 81486  | 2  | 3 | 3 | 0.05670724 | 0.03070643 | 5 | 6 | 0.45545077 |            |

|       |           |           |        |    |   |    |            |            |   |   |            |            |
|-------|-----------|-----------|--------|----|---|----|------------|------------|---|---|------------|------------|
| chr11 | 118448990 | 118517876 | 68887  | 3  | 5 | 7  | 0.04407651 | 0.30102999 | 8 | 6 | 0.58747015 | 0.129913   |
| chr11 | 118517876 | 118606840 | 88965  | 2  | 4 | 7  | 0.02074938 | 0.30102999 | 8 | 6 | 0.79906872 | 0.129913   |
| chr11 | 118606840 | 118660474 | 53635  | 2  | 4 | 7  | 0.01077081 | 0.30102999 | 9 | 6 | 1.01542894 | 0.129913   |
| chr11 | 118660474 | 118689267 | 28794  | 2  | 5 | 7  | 0.02473314 | 0.30102999 | 9 | 6 | 0.76806864 | 0.129913   |
| chr11 | 118689267 | 118828826 | 139560 | 3  | 5 | 6  | 0.02473314 | 0.20064824 | 2 | 9 | 0.76806864 | 0.20064824 |
| chr11 | 118828826 | 118894302 | 65477  | 2  | 4 | 6  | 0.01077081 | 0.20064824 | 4 | 6 | 1.01542894 | 0.20064824 |
| chr11 | 118894302 | 118898846 | 4545   | 2  | 4 | 6  | 0.01077081 | 0.30102999 | 9 | 5 | 1.01542894 | 0.12309572 |
| chr11 | 118898846 | 118969374 | 70529  | 7  | 4 | 6  | 0.01077081 | 0.20064824 | 4 | 6 | 1.01542894 | 0.20064824 |
| chr11 | 118969374 | 118998204 | 28831  | 3  | 4 | 5  | 0.01077081 | 0.12309572 | 9 | 6 | 1.01542894 | 0.30102999 |
| chr11 | 118998204 | 119180317 | 182114 | 10 | 4 | 6  | 0.01077081 | 0.20064824 | 4 | 6 | 1.01542894 | 0.20064824 |
| chr11 | 119180317 | 119217236 | 36920  | 4  | 3 | 6  | 0.00378107 | 0.20064824 | 9 | 6 | 1.33111237 | 0.20064824 |
| chr11 | 119217236 | 119242814 | 25579  | 1  | 3 | 6  | 0.0079614  | 0.30102999 | 8 | 5 | 1.07548421 | 0.12309572 |
| chr11 | 119242814 | 119288885 | 46072  | 2  | 4 | 6  | 0.02074938 | 0.30102999 | 8 | 5 | 0.79906872 | 0.12309572 |
| chr11 | 119288885 | 119293281 | 4397   | 2  | 4 | 6  | 0.01077081 | 0.20064824 | 9 | 6 | 1.01542894 | 0.20064824 |
| chr11 | 119293281 | 119321666 | 38886  | 1  | 4 | 5  | 0.01077081 | 0.19510895 | 9 | 5 | 1.01542894 | 0.19510895 |
| chr11 | 119321666 | 119332225 | 60     | 1  | 5 | 5  | 0.02473314 | 0.12309572 | 9 | 6 | 0.76806864 | 0.30102999 |
| chr11 | 119332225 | 119446154 | 113930 | 4  | 2 | 2  | 0.03812622 | 0.1053319  | 7 | 6 | 0.60763643 | 0.91219088 |
| chr11 | 119446154 | 119539406 | 93253  | 1  | 3 | 2  | 0.01598258 | 0.1053319  | 7 | 6 | 0.84395715 | 0.91219088 |
| chr11 | 119539406 | 119539465 | 60     | 1  | 3 | 4  | 0.01598258 | 0.03812622 | 7 | 7 | 0.84395715 | 0.60763643 |
| chr11 | 119539465 | 119568149 | 28685  | 1  | 2 | 4  | 0.00493743 | 0.03812622 | 7 | 7 | 1.16581773 | 0.60763643 |
| chr11 | 119568149 | 119569739 | 28591  | 1  | 1 | 4  | 8.47E-04   | 0.03812622 | 7 | 7 | 1.62048027 | 0.60763643 |
| chr11 | 119569739 | 119821204 | 224556 | 3  | 1 | 3  | 8.47E-04   | 0.02074938 | 7 | 8 | 1.62048027 | 0.79906872 |
| chr11 | 119821204 | 119821353 | 60     | 1  | 2 | 4  | 0.00493743 | 0.02074938 | 7 | 8 | 1.16581773 | 0.79906872 |
| chr11 | 119821353 | 119997842 | 176490 | 3  | 1 | 4  | 0.00493743 | 0.03812622 | 7 | 7 | 1.16581773 | 0.60763643 |
| chr11 | 119997842 | 120004507 | 9666   | 1  | 2 | 4  | 0.02162467 | 0.06713722 | 5 | 6 | 0.68214471 | 0.44141547 |
| chr11 | 120004507 | 120100568 | 96062  | 2  | 4 | 0  | 0          | 1.8734596  | 4 | 4 | 1.26272838 | 0.18734596 |
| chr11 | 120100568 | 120139957 | 39390  | 3  | 1 | 4  | 0.00478973 | 1.8734596  | 5 | 4 | 1.02643191 | 0.18734596 |
| chr11 | 120139957 | 120161828 | 21872  | 1  | 1 | 4  | 0.01091641 | 0.30102999 | 4 | 3 | 0.76005302 | 0.10122019 |
| chr11 | 120161828 | 120198698 | 36871  | 1  | 0 | 4  | 0          | 0.30102999 | 4 | 3 | 1.26272838 | 0.10122019 |
| chr11 | 120198698 | 120215064 | 16367  | 2  | 0 | 4  | 0          | 1.8734596  | 4 | 4 | 1.26272838 | 0.18734596 |
| chr11 | 120215064 | 120215123 | 60     | 1  | 1 | 4  | 0.01091641 | 1.8734596  | 4 | 4 | 0.76005302 | 0.18734596 |
| chr11 | 120215123 | 120276871 | 61749  | 1  | 0 | 4  | 0          | 1.8734596  | 4 | 4 | 1.26272838 | 0.18734596 |
| chr11 | 120276871 | 120328862 | 51992  | 1  | 0 | 4  | 0          | 0.30102999 | 4 | 3 | 1.26272838 | 0.10122019 |
| chr11 | 120328862 | 120377974 | 49113  | 2  | 0 | 4  | 0          | 0.47744371 | 4 | 4 | 0.6429175  | 0.0429175  |
| chr11 | 120377974 | 120482877 | 104904 | 3  | 0 | 4  | 0          | 1.8734596  | 4 | 4 | 1.26272838 | 0.18734596 |
| chr11 | 120482877 | 120580844 | 97968  | 2  | 0 | 4  | 0          | 0.30102999 | 4 | 3 | 1.26272838 | 0.10122019 |
| chr11 | 120580844 | 120898032 | 317189 | 7  | 0 | 4  | 0          | 1.8734596  | 4 | 4 | 1.26272838 | 0.18734596 |
| chr11 | 120898032 | 120970864 | 72833  | 2  | 0 | 4  | 0          | 0.30102999 | 4 | 3 | 1.26272838 | 0.10122019 |
| chr11 | 120970864 | 120970923 | 60     | 1  | 1 | 4  | 0.00478973 | 1.8734596  | 5 | 4 | 1.02643191 | 0.18734596 |
| chr11 | 120970923 | 121059837 | 88915  | 2  | 1 | 4  | 0.01091641 | 0.30102999 | 4 | 3 | 0.76005302 | 0.10122019 |
| chr11 | 121059837 | 121059896 | 60     | 1  | 1 | 4  | 0.00478973 | 0.30102999 | 5 | 2 | 1.02643191 | 0.10122019 |
| chr11 | 121059896 | 121164451 | 104556 | 1  | 0 | 3  | 0          | 0.30102999 | 5 | 3 | 1.60515106 | 0.08289318 |
| chr11 | 121164451 | 121172877 | 8427   | 2  | 0 | 4  | 0          | 0.47744371 | 5 | 2 | 1.60515106 | 0.0429175  |
| chr11 | 121172877 | 121172936 | 60     | 1  | 0 | 4  | 0          | 0.30102999 | 5 | 3 | 1.60515106 | 0.10122019 |
| chr11 | 121172936 | 121201620 | 28685  | 2  | 0 | 3  | 0          | 1.7593012  | 5 | 3 | 1.60515106 | 0.17593012 |
| chr11 | 121201620 | 121308861 | 107242 | 2  | 0 | 4  | 0          | 0.30102999 | 5 | 3 | 1.60515106 | 0.10122019 |
| chr11 | 121308861 | 121360841 | 51981  | 1  | 0 | 3  | 0          | 1.7593012  | 5 | 3 | 1.60515106 | 0.17593012 |
| chr11 | 121360841 | 121420666 | 59826  | 2  | 0 | 3  | 0          | 1.7593012  | 4 | 3 | 1.26272838 | 0.17593012 |
| chr11 | 121420666 | 121445069 | 24404  | 2  | 0 | 4  | 0          | 0.30102999 | 4 | 3 | 1.26272838 | 0.10122019 |
| chr11 | 121445069 | 121578616 | 133548 | 2  | 0 | 3  | 0          | 1.7593012  | 3 | 3 | 0.93173516 | 0.17593012 |
| chr11 | 121578616 | 121578675 | 60     | 1  | 1 | 3  | 0.02438896 | 1.7593012  | 3 | 3 | 0.51676182 | 0.17593012 |
| chr11 | 121578675 | 121829034 | 250360 | 1  | 0 | 3  | 0          | 1.7593012  | 3 | 3 | 0.93173516 | 0.17593012 |
| chr11 | 121829034 | 121925788 | 96755  | 2  | 1 | 3  | 0.01091641 | 1.7593012  | 4 | 3 | 0.76005302 | 0.17593012 |
| chr11 | 121925788 | 121925847 | 60     | 1  | 1 | 3  | 0.01091641 | 0.10122019 | 4 | 4 | 0.76005302 | 0.30102999 |
| chr11 | 121925847 | 121997214 | 71368  | 2  | 1 | 3  | 0.02438896 | 1.7593012  | 3 | 3 | 0.51676182 | 0.17593012 |
| chr11 | 121997214 | 122053210 | 55997  | 3  | 1 | 5  | 0.02438896 | 0.45545077 | 3 | 3 | 0.51676182 | 0.05670724 |
| chr11 | 122053210 | 122293668 | 240459 | 2  | 1 | 3  | 0.02438896 | 0.30102999 | 2 | 2 | 0.51676182 | 0.08289318 |
| chr11 | 122293668 | 122293727 | 60     | 1  | 1 | 4  | 0.01091641 | 0.47744371 | 4 | 2 | 0.76005302 | 0.0429175  |
| chr11 | 122293727 | 122467330 | 173604 | 1  | 1 | 3  | 0.05404976 | 0.30102999 | 2 | 2 | 0.30102999 | 0.08289318 |
| chr11 | 122467330 | 122467389 | 60     | 1  | 1 | 3  | 0.02438896 | 0.30102999 | 3 | 2 | 0.51676182 | 0.08289318 |
| chr11 | 122467389 | 122621163 | 153775 | 3  | 0 | 2  | 0          | 0.30102999 | 3 | 1 | 0.93173516 | 0.05404976 |
| chr11 | 122621163 | 122621222 | 60     | 1  | 1 | 4  | 0.02438896 | 0.76005302 | 3 | 1 | 0.51676182 | 0.01091641 |
| chr11 | 122621222 | 122680463 | 59242  | 1  | 2 | 2  | 0.02438896 | 0.30102999 | 3 | 1 | 0.51676182 | 0.05404976 |
| chr11 | 122680463 | 122726414 | 45952  | 1  | 1 | 60 | 0.02438896 | 0.1218695  | 3 | 1 | 0.51676182 | 0.1218695  |
| chr11 | 122726414 | 122726473 | 60     | 1  | 1 | 1  | 0.01091641 | 0.05404976 | 4 | 2 | 0.76005302 | 0.30102999 |
| chr11 | 122726473 | 122756645 | 30173  | 1  | 1 | 3  | 0.02438896 | 0.1218695  | 3 | 1 | 0.51676182 | 0.1218695  |
| chr11 | 122756645 | 122862489 | 105845 | 5  | 1 | 3  | 0.02438896 | 0.51676182 | 3 | 3 | 0.51676182 | 0.02438896 |
| chr11 | 122862489 | 122862548 | 60     | 1  | 1 | 4  | 0.02438896 | 0.76005302 | 3 | 1 | 0.51676182 | 0.01091641 |
| chr11 | 122862548 | 122968498 | 20951  | 1  | 3 | 3  | 0.02438896 | 0.51676182 | 3 | 1 | 0.51676182 | 0.02438896 |
| chr11 | 122968498 | 122995448 | 109511 | 2  | 1 | 3  | 0.02438896 | 0.30102999 | 3 | 2 | 0.51676182 | 0.08289318 |
| chr11 | 122995448 | 123045174 | 49727  | 2  | 1 | 4  | 0.02438896 | 0.30102999 | 3 | 3 | 0.51676182 | 0.10122019 |
| chr11 | 123045174 | 123045233 | 60     | 1  | 1 | 5  | 0.02438896 | 0.45545077 | 1 | 3 | 0.51676182 | 0.05670724 |
| chr11 | 123045233 | 123111261 | 66029  | 2  | 0 | 4  | 0          | 0.47744371 | 3 | 2 | 0.93173516 | 0.0429175  |
| chr11 | 123111261 | 123111320 | 60     | 1  | 1 | 5  | 0.02438896 | 0.45545077 | 3 | 3 | 0.51676182 | 0.05670724 |
| chr11 | 123111320 | 123252491 | 141172 | 1  | 0 | 5  | 0          | 0.45545077 | 3 | 3 | 0.93173516 | 0.05670724 |
| chr11 | 123252491 | 123322959 | 70469  | 2  | 0 | 5  | 0          | 0.19510895 | 3 | 5 | 0.93173516 | 0.19510895 |
| chr11 | 123322959 | 123414357 | 91399  | 2  | 0 | 5  | 0          | 0.19510895 | 4 | 5 | 1.26272838 | 0.19510895 |
| chr11 | 123414357 | 123443097 | 28741  | 2  | 0 | 5  | 0          | 0.12309572 | 4 | 6 | 1.26272838 | 0.30102999 |
| chr11 | 123443097 | 123513991 | 70895  | 2  | 0 | 5  | 0          | 0.19510895 | 4 | 5 | 1.26272838 | 0.19510895 |
| chr11 | 123513991 | 123514050 | 60     | 1  | 1 | 5  | 0.01091641 | 0.19510895 | 5 | 5 | 0.76005302 | 0.19510895 |
| chr11 | 123514050 | 123596435 | 82386  | 2  | 0 | 5  | 0          | 0.19510895 | 5 | 4 | 1.26272838 | 0.19510895 |
| chr11 | 123596435 | 123624201 | 27767  | 1  | 0 | 5  | 0          | 0.19510895 | 3 | 5 | 0.93173516 | 0.19510895 |
| chr11 | 123624201 | 123755593 | 131393 | 3  | 1 | 5  | 0.01091641 | 0.19510895 | 4 | 5 | 0.76005302 | 0.19510895 |
| chr11 | 123755593 | 123755652 | 60     | 1  | 1 | 6  | 0.01091641 | 0.20064824 | 4 | 6 | 0.76005302 | 0.20064824 |
| chr11 | 123755652 | 123789540 | 33889  | 1  | 0 | 5  | 0          | 0.12309572 | 3 | 6 | 0.93173516 | 0.30102999 |
| chr11 | 123789540 | 123789599 | 60     | 1  | 0 | 5  | 0          | 0.07511598 | 7 | 6 | 0.93173516 | 0.43181735 |
| chr11 | 123789599 | 123860285 | 70687  | 1  | 0 | 5  | 0          | 0.12309572 | 3 | 6 | 0.93173516 | 0.30102999 |
| chr11 | 123860285 | 123860344 | 60     | 1  | 1 | 5  | 0.01091641 | 0.12309572 | 4 | 6 | 0.76005302 | 0.30102999 |
| chr11 | 123860344 | 123978575 | 118232 | 2  | 1 | 4  | 0.01091641 | 1.8734596  | 4 | 4 | 0.76005302 | 0.18734596 |
| chr11 | 123978575 | 124013207 | 34633  | 3  | 1 | 5  | 0.00478973 | 0.12309572 | 5 | 6 | 1.02643191 | 0.30102999 |
| chr11 | 124013207 | 12        |        |    |   |    |            |            |   |   |            |            |

|       |           |           |        |   |   |   |            |            |   |   |            |            |
|-------|-----------|-----------|--------|---|---|---|------------|------------|---|---|------------|------------|
| chr11 | 125774792 | 125792773 | 17982  | 1 | 1 | 3 | 0.00204627 | 0.05670724 | 6 | 5 | 1.31360226 | 0.45545077 |
| chr11 | 125792773 | 125833462 | 40690  | 1 | 1 | 3 | 0.00204627 | 0.10122019 | 6 | 4 | 1.31360226 | 0.30102999 |
| chr11 | 125833462 | 125864146 | 30685  | 2 | 1 | 5 | 0.00204627 | 0.30102999 | 6 | 4 | 1.31360226 | 0.11390336 |
| chr11 | 125864146 | 125878336 | 14191  | 1 | 1 | 5 | 0.00478973 | 0.30102999 | 5 | 4 | 1.02643191 | 0.11390336 |
| chr11 | 125878336 | 126148026 | 269691 | 7 | 1 | 6 | 0.00478973 | 0.30102999 | 7 | 5 | 1.02643191 | 0.12309572 |
| chr11 | 126148026 | 126156495 | 8470   | 1 | 1 | 6 | 0.00478973 | 0.44141547 | 5 | 4 | 1.02643191 | 0.06713722 |
| chr11 | 126156495 | 126219397 | 62903  | 1 | 1 | 4 | 0.01091641 | 0.18734596 | 4 | 4 | 0.76005302 | 0.18734596 |
| chr11 | 126219397 | 126257061 | 37665  | 1 | 1 | 4 | 0.01091641 | 0.11390336 | 4 | 5 | 0.76005302 | 0.30102999 |
| chr11 | 126257061 | 126299163 | 42103  | 3 | 1 | 4 | 0.00478973 | 0.11390336 | 5 | 5 | 1.02643191 | 0.30102999 |
| chr11 | 126299163 | 126299222 | 60     | 1 | 1 | 6 | 0.00204627 | 0.30102999 | 6 | 5 | 1.31360226 | 0.12309572 |
| chr11 | 126299222 | 126433764 | 134543 | 2 | 1 | 4 | 0.00478973 | 0.11390336 | 5 | 5 | 1.02643191 | 0.30102999 |
| chr11 | 126433764 | 126503765 | 70002  | 1 | 1 | 4 | 0.01091641 | 0.11390336 | 4 | 5 | 0.76005302 | 0.30102999 |
| chr11 | 126503765 | 126503824 | 60     | 1 | 1 | 5 | 0.01091641 | 0.19510895 | 4 | 5 | 0.76005302 | 0.19510895 |
| chr11 | 126503824 | 126622218 | 118395 | 3 | 0 | 4 | 0          | 0.11390336 | 4 | 5 | 1.26272838 | 0.30102999 |
| chr11 | 126622218 | 126654804 | 32587  | 2 | 1 | 4 | 0.01091641 | 0.11390336 | 4 | 5 | 0.76005302 | 0.30102999 |
| chr11 | 126654804 | 126767927 | 113124 | 2 | 1 | 3 | 0.01091641 | 0.10122019 | 4 | 4 | 0.76005302 | 0.30102999 |
| chr11 | 126767927 | 126863276 | 95350  | 2 | 0 | 3 | 0          | 0.17593012 | 4 | 3 | 1.26272838 | 0.17593012 |
| chr11 | 126863276 | 126863335 | 60     | 1 | 0 | 4 | 0          | 0.18734596 | 4 | 4 | 1.26272838 | 0.18734596 |
| chr11 | 126863335 | 126875921 | 12587  | 2 | 0 | 4 | 0          | 0.30102999 | 4 | 3 | 1.26272838 | 0.10122019 |
| chr11 | 126875921 | 127054775 | 178855 | 1 | 0 | 4 | 0          | 0.30102999 | 3 | 3 | 0.93173516 | 0.10122019 |
| chr11 | 127054775 | 127054834 | 60     | 1 | 0 | 4 | 0          | 0.18734596 | 3 | 4 | 0.93173516 | 0.18734596 |
| chr11 | 127054834 | 127154844 | 100011 | 1 | 0 | 3 | 0          | 0.76005302 | 3 | 1 | 0.93173516 | 0.01091641 |
| chr11 | 127154844 | 127255598 | 100755 | 1 | 0 | 3 | 0          | 0.93173516 | 3 | 0 | 0.93173516 | 0          |
| chr11 | 127255598 | 127255657 | 60     | 1 | 0 | 3 | 0          | 0.51676182 | 3 | 1 | 0.93173516 | 0.02438896 |
| chr11 | 127255657 | 127546842 | 291186 | 2 | 0 | 3 | 0          | 0.93173516 | 2 | 0 | 0.61140001 | 0          |
| chr11 | 127546842 | 127546901 | 60     | 1 | 1 | 5 | 0.05404976 | 0.45545077 | 2 | 3 | 0.30102999 | 0.05670724 |
| chr11 | 127546901 | 127771597 | 224697 | 1 | 1 | 5 | 0.05404976 | 1.02643191 | 2 | 1 | 0.30102999 | 0.00478973 |
| chr11 | 127771597 | 127771656 | 60     | 1 | 1 | 5 | 0.05404976 | 0.45545077 | 2 | 3 | 0.30102999 | 0.05670724 |
| chr11 | 127771656 | 127889198 | 117543 | 1 | 0 | 4 | 0          | 0.47744371 | 2 | 2 | 0.61140001 | 0.0429175  |
| chr11 | 127889198 | 127889257 | 60     | 1 | 1 | 5 | 0.02438896 | 0.45545077 | 3 | 3 | 0.51676182 | 0.05670724 |
| chr11 | 127889257 | 128076421 | 187165 | 1 | 1 | 4 | 0.02438896 | 0.47744371 | 2 | 2 | 0.51676182 | 0.0429175  |
| chr11 | 128076421 | 128076480 | 60     | 1 | 2 | 4 | 0.0429175  | 0.30102999 | 4 | 3 | 0.47744371 | 0.10122019 |
| chr11 | 128076480 | 128170880 | 94401  | 1 | 2 | 4 | 0.0429175  | 0.47744371 | 2 | 2 | 0.47744371 | 0.0429175  |
| chr11 | 128170880 | 128170939 | 60     | 1 | 2 | 5 | 0.02162467 | 0.68214471 | 5 | 2 | 0.68214471 | 0.02162467 |
| chr11 | 128170939 | 128313173 | 160435 | 1 | 1 | 4 | 0.01091641 | 0.76005302 | 4 | 1 | 0.76005302 | 0.01091641 |
| chr11 | 128313173 | 128373445 | 42073  | 5 | 1 | 5 | 0.01091641 | 1.02643191 | 1 | 1 | 0.76005302 | 0.00478973 |
| chr11 | 128373445 | 128447967 | 74523  | 3 | 2 | 5 | 0.0429175  | 1.02643191 | 4 | 1 | 0.47744371 | 0.00478973 |
| chr11 | 128447967 | 128578771 | 130805 | 1 | 1 | 5 | 0.01091641 | 1.02643191 | 4 | 1 | 0.76005302 | 0.00478973 |
| chr11 | 128578771 | 128708441 | 129671 | 8 | 1 | 6 | 0.01091641 | 1.31360226 | 1 | 1 | 0.76005302 | 0.00204627 |
| chr11 | 128708441 | 128772225 | 63785  | 2 | 1 | 4 | 0.01091641 | 0.76005302 | 4 | 1 | 0.76005302 | 0.01091641 |
| chr11 | 128772225 | 128772274 | 50     | 1 | 1 | 5 | 0.01091641 | 0.68214471 | 4 | 2 | 0.76005302 | 0.02162467 |
| chr11 | 128772274 | 128894057 | 121784 | 5 | 1 | 4 | 0.01091641 | 0.47744371 | 2 | 2 | 0.76005302 | 0.0429175  |
| chr11 | 128894057 | 128993322 | 99266  | 4 | 1 | 4 | 0.01091641 | 0.30102999 | 4 | 3 | 0.76005302 | 0.10122019 |
| chr11 | 128993322 | 129034189 | 40868  | 1 | 1 | 4 | 0.00478973 | 0.30102999 | 5 | 4 | 1.02643191 | 0.11390336 |
| chr11 | 129034189 | 129061060 | 26872  | 2 | 2 | 6 | 0.01053319 | 0.44141547 | 6 | 4 | 0.91219088 | 0.06713722 |
| chr11 | 129061060 | 129090507 | 29448  | 1 | 2 | 5 | 0.01053319 | 0.30102999 | 6 | 4 | 0.91219088 | 0.11390336 |
| chr11 | 129090507 | 129161900 | 71394  | 1 | 2 | 5 | 0.01053319 | 0.45545077 | 6 | 3 | 0.91219088 | 0.05670724 |
| chr11 | 129161900 | 129255977 | 94078  | 1 | 1 | 5 | 0.00478973 | 0.45545077 | 5 | 3 | 1.02643191 | 0.05670724 |
| chr11 | 129255977 | 129302317 | 46341  | 3 | 1 | 5 | 0.00478973 | 0.30102999 | 5 | 4 | 1.02643191 | 0.11390336 |
| chr11 | 129302317 | 129321760 | 19444  | 2 | 1 | 7 | 0.00478973 | 0.43181735 | 5 | 5 | 1.02643191 | 0.07511598 |
| chr11 | 129321760 | 129361018 | 39259  | 1 | 1 | 6 | 0.00478973 | 0.44141547 | 4 | 4 | 1.02643191 | 0.06713722 |
| chr11 | 129361018 | 129570431 | 209414 | 1 | 1 | 5 | 0.00478973 | 0.45545077 | 5 | 3 | 1.02643191 | 0.05670724 |
| chr11 | 129570431 | 129570490 | 60     | 1 | 1 | 5 | 0.00204627 | 0.30102999 | 6 | 4 | 1.31360226 | 0.11390336 |
| chr11 | 129570490 | 129722493 | 152004 | 1 | 1 | 5 | 0.00204627 | 1.02643191 | 6 | 1 | 1.31360226 | 0.00478973 |
| chr11 | 129722493 | 129722546 | 54     | 1 | 2 | 5 | 0.01053319 | 1.02643191 | 6 | 1 | 0.91219088 | 0.00478973 |
| chr11 | 129722546 | 129764846 | 42301  | 3 | 1 | 5 | 0.00204627 | 1.02643191 | 6 | 1 | 1.31360226 | 0.00478973 |
| chr11 | 129764846 | 129764904 | 59     | 1 | 2 | 5 | 0.01053319 | 0.68214471 | 6 | 2 | 0.91219088 | 0.02162467 |
| chr11 | 129764904 | 129899266 | 134363 | 4 | 2 | 5 | 0.01053319 | 1.02643191 | 6 | 1 | 0.91219088 | 0.00478973 |
| chr11 | 129899266 | 129966779 | 67514  | 1 | 2 | 5 | 0.02162467 | 1.02643191 | 5 | 1 | 0.68214471 | 0.00478973 |
| chr11 | 129966779 | 129992355 | 25577  | 2 | 2 | 5 | 0.02162467 | 0.68214471 | 5 | 2 | 0.68214471 | 0.02162467 |
| chr11 | 129992355 | 130014663 | 22309  | 1 | 2 | 4 | 0.02162467 | 0.47744371 | 5 | 2 | 0.68214471 | 0.0429175  |
| chr11 | 130014663 | 130014722 | 60     | 1 | 2 | 4 | 0.02162467 | 0.30102999 | 5 | 3 | 0.68214471 | 0.10122019 |
| chr11 | 130014722 | 130178562 | 163841 | 5 | 2 | 4 | 0.0429175  | 0.30102999 | 4 | 3 | 0.47744371 | 0.10122019 |
| chr11 | 130178562 | 130285086 | 106253 | 2 | 2 | 5 | 0.0429175  | 0.45545077 | 3 | 3 | 0.47744371 | 0.05670724 |
| chr11 | 130285086 | 130285134 | 4049   | 2 | 2 | 5 | 0.0429175  | 0.30102999 | 4 | 3 | 0.47744371 | 0.11390336 |
| chr11 | 130285134 | 130379600 | 90467  | 2 | 2 | 4 | 0.0429175  | 0.18734596 | 4 | 4 | 0.47744371 | 0.18734596 |
| chr11 | 130379600 | 130413593 | 33993  | 2 | 2 | 6 | 0.0429175  | 0.30102999 | 4 | 4 | 0.47744371 | 0.12309572 |
| chr11 | 130413593 | 130547126 | 133535 | 2 | 2 | 6 | 0.0429175  | 0.44141547 | 4 | 4 | 0.47744371 | 0.06713722 |
| chr11 | 130547126 | 130547185 | 60     | 1 | 2 | 7 | 0          | 0.429175   | 4 | 4 | 0.47744371 | 0.07511598 |
| chr11 | 130547185 | 130584263 | 37079  | 1 | 1 | 6 | 0.01091641 | 0.44141547 | 4 | 4 | 0.76005302 | 0.06713722 |
| chr11 | 130584263 | 130635725 | 51463  | 1 | 1 | 5 | 0.01091641 | 0.30102999 | 4 | 4 | 0.76005302 | 0.11390336 |
| chr11 | 130635725 | 130635784 | 60     | 1 | 2 | 6 | 0.0429175  | 0.30102999 | 4 | 5 | 0.47744371 | 0.12309572 |
| chr11 | 130635784 | 130703906 | 68123  | 1 | 1 | 6 | 0.01091641 | 0.30102999 | 4 | 5 | 0.76005302 | 0.12309572 |
| chr11 | 130703906 | 130719758 | 15853  | 2 | 1 | 7 | 0.01091641 | 0.30102999 | 4 | 6 | 0.76005302 | 0.129913   |
| chr11 | 130719758 | 130784198 | 64441  | 3 | 1 | 7 | 0.01091641 | 0.43181735 | 4 | 5 | 0.76005302 | 0.07511598 |
| chr11 | 130784198 | 131013203 | 229006 | 3 | 1 | 6 | 0.01091641 | 0.63695542 | 3 | 3 | 0.76005302 | 0.03070643 |
| chr11 | 131013203 | 131110755 | 97553  | 2 | 1 | 7 | 0.01091641 | 0.84395715 | 4 | 3 | 0.76005302 | 0.01598258 |
| chr11 | 131110755 | 131110814 | 60     | 1 | 1 | 8 | 0.01091641 | 0.79906872 | 4 | 4 | 0.76005302 | 0.02074938 |
| chr11 | 131110814 | 131267471 | 156658 | 2 | 0 | 7 | 0          | 0.84395715 | 3 | 3 | 1.26272838 | 0.01598258 |
| chr11 | 131267471 | 131267530 | 60     | 1 | 0 | 8 | 0          | 0.79906872 | 4 | 4 | 1.26272838 | 0.02074938 |
| chr11 | 131267530 | 131390419 | 122890 | 0 | 0 | 8 | 0          | 1.07548421 | 4 | 3 | 1.26272838 | 0.0079614  |
| chr11 | 131390419 | 131605551 | 215133 | 5 | 0 | 8 | 0          | 0.79906872 | 4 | 4 | 1.26272838 | 0.02074938 |
| chr11 | 131605551 | 131702440 | 96890  | 2 | 0 | 8 | 0          | 0.79906872 | 3 | 4 | 0.93173516 | 0.02074938 |
| chr11 | 131702440 | 131780086 | 77647  | 1 | 0 | 7 | 0          | 0.60763643 | 3 | 4 | 0.93173516 | 0.03812622 |
| chr11 | 131780086 | 132137301 | 357216 | 8 | 0 | 7 | 0.02438896 | 0.60763643 | 3 | 4 | 0.51676182 | 0.03812622 |
| chr11 | 132137301 | 132225369 | 88069  | 3 | 1 | 6 | 0.02438896 | 0.44141547 | 4 | 4 | 0.51676182 | 0.06713722 |
| chr11 | 132225369 | 132225428 | 60     | 1 | 1 | 6 | 0.02438896 | 0.30102999 | 3 | 5 | 0.51676182 | 0.12309572 |
| chr11 | 132225428 | 13233033  | 107066 | 2 | 1 | 6 | 0.02438896 | 0.44141547 | 3 | 4 | 0.51676182 | 0.06713722 |
| chr11 | 13233033  | 13233092  | 60     | 1 | 1 | 8 | 0.02438896 | 0.58747015 | 3 | 5 | 0.51676182 | 0.04407651 |
| chr11 | 13233092  | 132399092 |        |   |   |   |            |            |   |   |            |            |



|       |         |         |        |    |    |   |            |            |   |   |            |            |
|-------|---------|---------|--------|----|----|---|------------|------------|---|---|------------|------------|
| chr12 | 786623  | 835365  | 48743  | 1  | 6  | 1 | 0.08122616 | 0.1218695  | 8 | 1 | 0.4250187  | 0.1218695  |
| chr12 | 835365  | 835424  | 60     | 1  | 7  | 2 | 0.13499366 | 0.30102999 | 8 | 1 | 0.30102999 | 0.05404976 |
| chr12 | 835424  | 921383  | 85960  | 2  | 6  | 2 | 0.08122616 | 0.30102999 | 8 | 1 | 0.4250187  | 0.05404976 |
| chr12 | 921383  | 921442  | 60     | 1  | 9  | 2 | 0.20975986 | 0.30102999 | 9 | 1 | 0.20975986 | 0.05404976 |
| chr12 | 921442  | 1064055 | 142614 | 3  | 9  | 2 | 0.30102999 | 0.30102999 | 8 | 1 | 0.13872638 | 0.05404976 |
| chr12 | 1064055 | 1219472 | 155418 | 3  | 8  | 2 | 0.20764654 | 0.30102999 | 8 | 1 | 0.20764654 | 0.05404976 |
| chr12 | 1219472 | 1258131 | 38660  | 2  | 9  | 2 | 0.30102999 | 0.30102999 | 8 | 1 | 0.13872638 | 0.05404976 |
| chr12 | 1258131 | 1313319 | 55189  | 1  | 9  | 2 | 0.42015402 | 0.30102999 | 7 | 1 | 0.08584816 | 0.05404976 |
| chr12 | 1313319 | 1367681 | 54363  | 1  | 8  | 2 | 0.30102999 | 0.30102999 | 7 | 1 | 0.13499366 | 0.05404976 |
| chr12 | 1367681 | 1367740 | 60     | 1  | 8  | 2 | 0.20764654 | 0.30102999 | 8 | 1 | 0.20764654 | 0.05404976 |
| chr12 | 1367740 | 1399200 | 31461  | 1  | 8  | 2 | 0.30102999 | 0.30102999 | 7 | 1 | 0.13499366 | 0.05404976 |
| chr12 | 1399200 | 1476151 | 76952  | 1  | 7  | 2 | 0.20469099 | 0.30102999 | 7 | 1 | 0.20469099 | 0.05404976 |
| chr12 | 1476151 | 1476210 | 60     | 1  | 9  | 2 | 0.30102999 | 0.30102999 | 8 | 1 | 0.13872638 | 0.05404976 |
| chr12 | 1476210 | 1518073 | 41864  | 1  | 7  | 2 | 0.20469099 | 0.30102999 | 7 | 1 | 0.20469099 | 0.05404976 |
| chr12 | 1518073 | 1518132 | 60     | 1  | 8  | 2 | 0.30102999 | 0.30102999 | 7 | 1 | 0.13499366 | 0.05404976 |
| chr12 | 1518132 | 1644476 | 126345 | 3  | 7  | 2 | 0.20469099 | 0.30102999 | 7 | 1 | 0.20469099 | 0.05404976 |
| chr12 | 1644476 | 1696902 | 52427  | 2  | 7  | 2 | 0.20469099 | 0.1575501  | 7 | 2 | 0.20469099 | 0.1575501  |
| chr12 | 1696902 | 1749581 | 52680  | 3  | 8  | 2 | 0.30102999 | 0.1575501  | 7 | 2 | 0.13499366 | 0.1575501  |
| chr12 | 1749581 | 1863686 | 114106 | 5  | 8  | 2 | 0.20764654 | 0.1575501  | 8 | 2 | 0.20764654 | 0.1575501  |
| chr12 | 1863686 | 1904537 | 40852  | 1  | 7  | 2 | 0.13499366 | 0.1575501  | 8 | 2 | 0.30102999 | 0.1575501  |
| chr12 | 1904537 | 1904585 | 49     | 1  | 8  | 2 | 0.20764654 | 0.1575501  | 8 | 2 | 0.20764654 | 0.1575501  |
| chr12 | 1904585 | 1968642 | 64058  | 2  | 7  | 2 | 0.13499366 | 0.1575501  | 8 | 2 | 0.30102999 | 0.1575501  |
| chr12 | 1968642 | 1995419 | 26778  | 2  | 8  | 2 | 0.20764654 | 0.1575501  | 8 | 2 | 0.20764654 | 0.1575501  |
| chr12 | 1995419 | 2086180 | 90762  | 2  | 7  | 2 | 0.13499366 | 0.1575501  | 8 | 2 | 0.30102999 | 0.1575501  |
| chr12 | 2086180 | 2112401 | 26222  | 2  | 7  | 3 | 0.13499366 | 0.30102999 | 7 | 2 | 0.30102999 | 0.08289318 |
| chr12 | 2112401 | 2230845 | 118445 | 2  | 7  | 2 | 0.20469099 | 0.1575501  | 7 | 2 | 0.20469099 | 0.1575501  |
| chr12 | 2230845 | 2345759 | 114915 | 3  | 7  | 3 | 0.20469099 | 0.30102999 | 7 | 2 | 0.20469099 | 0.08289318 |
| chr12 | 2345759 | 2345818 | 60     | 1  | 7  | 3 | 0.13499366 | 0.30102999 | 8 | 2 | 0.30102999 | 0.08289318 |
| chr12 | 2345818 | 2438871 | 93054  | 2  | 7  | 3 | 0.20469099 | 0.30102999 | 7 | 2 | 0.20469099 | 0.08289318 |
| chr12 | 2438871 | 2623147 | 184277 | 4  | 7  | 3 | 0.13499366 | 0.30102999 | 8 | 2 | 0.30102999 | 0.08289318 |
| chr12 | 2623147 | 2623206 | 60     | 1  | 7  | 3 | 0.13499366 | 0.17593012 | 8 | 3 | 0.30102999 | 0.17593012 |
| chr12 | 2623206 | 3178479 | 555274 | 18 | 7  | 3 | 0.20469099 | 0.17593012 | 7 | 3 | 0.20469099 | 0.17593012 |
| chr12 | 3178479 | 3394129 | 215651 | 5  | 7  | 3 | 0.30102999 | 0.17593012 | 6 | 3 | 0.1299312  | 0.17593012 |
| chr12 | 3394129 | 3731272 | 337144 | 7  | 5  | 3 | 0.12309572 | 0.17593012 | 6 | 3 | 0.30102999 | 0.17593012 |
| chr12 | 3731272 | 3850575 | 119304 | 2  | 5  | 2 | 0.12309572 | 0.1575501  | 6 | 2 | 0.30102999 | 0.1575501  |
| chr12 | 3850575 | 3907929 | 57355  | 2  | 5  | 3 | 0.12309572 | 0.30102999 | 6 | 2 | 0.30102999 | 0.08289318 |
| chr12 | 3907929 | 4543321 | 635393 | 12 | 4  | 4 | 0.06713722 | 0.30102999 | 6 | 2 | 0.44141547 | 0.08289318 |
| chr12 | 4543321 | 4595093 | 51773  | 2  | 4  | 4 | 0.06713722 | 0.47744371 | 6 | 2 | 0.44141547 | 0.0429175  |
| chr12 | 4595093 | 4790138 | 195046 | 6  | 4  | 3 | 0.06713722 | 0.30102999 | 6 | 2 | 0.44141547 | 0.08289318 |
| chr12 | 4790138 | 5155203 | 365066 | 8  | 4  | 2 | 0.06713722 | 0.1575501  | 6 | 2 | 0.44141547 | 0.1575501  |
| chr12 | 5155203 | 5221304 | 66102  | 3  | 4  | 3 | 0.06713722 | 0.30102999 | 6 | 2 | 0.44141547 | 0.08289318 |
| chr12 | 5221304 | 5347885 | 126582 | 2  | 5  | 3 | 0.12309572 | 0.30102999 | 6 | 2 | 0.30102999 | 0.08289318 |
| chr12 | 5347885 | 5447696 | 99812  | 2  | 5  | 3 | 0.12309572 | 0.17593012 | 6 | 3 | 0.30102999 | 0.17593012 |
| chr12 | 5447696 | 5447755 | 60     | 1  | 6  | 4 | 0.20064824 | 0.18734596 | 6 | 4 | 0.20064824 | 0.18734596 |
| chr12 | 5447755 | 5513678 | 65924  | 1  | 6  | 4 | 0.20064824 | 0.30102999 | 6 | 3 | 0.20064824 | 0.10122019 |
| chr12 | 5513678 | 5513737 | 60     | 1  | 8  | 4 | 0.4250187  | 0.30102999 | 6 | 3 | 0.08122616 | 0.10122019 |
| chr12 | 5513737 | 5545532 | 31796  | 1  | 8  | 3 | 0.4250187  | 0.17593012 | 6 | 3 | 0.08122616 | 0.17593012 |
| chr12 | 5545532 | 5603350 | 57819  | 1  | 6  | 3 | 0.20064824 | 0.17593012 | 6 | 3 | 0.20064824 | 0.17593012 |
| chr12 | 5603350 | 5672258 | 68909  | 2  | 7  | 4 | 0.30102999 | 0.18734596 | 6 | 4 | 0.1299312  | 0.18734596 |
| chr12 | 5672258 | 5672314 | 57     | 1  | 8  | 4 | 0.4250187  | 0.18734596 | 6 | 4 | 0.08122616 | 0.18734596 |
| chr12 | 5672314 | 5738225 | 65912  | 1  | 8  | 3 | 0.4250187  | 0.10122019 | 6 | 4 | 0.08122616 | 0.30102999 |
| chr12 | 5738225 | 5738284 | 60     | 1  | 9  | 3 | 0.5732208  | 0.10122019 | 6 | 4 | 0.04875589 | 0.30102999 |
| chr12 | 5738284 | 5769389 | 31106  | 1  | 9  | 3 | 0.5732208  | 0.17593012 | 6 | 3 | 0.04875589 | 0.17593012 |
| chr12 | 5769389 | 5816806 | 47418  | 2  | 10 | 3 | 0.74627054 | 0.17593012 | 6 | 3 | 0.02793176 | 0.17593012 |
| chr12 | 5816806 | 5816865 | 60     | 1  | 10 | 4 | 0.74627054 | 0.18734596 | 6 | 4 | 0.02793176 | 0.18734596 |
| chr12 | 5816865 | 5916479 | 99615  | 2  | 10 | 4 | 0.74627054 | 0.30102999 | 6 | 3 | 0.02793176 | 0.10122019 |
| chr12 | 5916479 | 5916532 | 54     | 1  | 10 | 4 | 0.74627054 | 0.18734596 | 6 | 4 | 0.02793176 | 0.18734596 |
| chr12 | 5916532 | 5979800 | 63269  | 1  | 9  | 4 | 0.5732208  | 0.18734596 | 6 | 4 | 0.04875589 | 0.18734596 |
| chr12 | 5979800 | 5979859 | 60     | 1  | 9  | 4 | 0.5732208  | 0.11390336 | 6 | 5 | 0.04875589 | 0.30102999 |
| chr12 | 5979859 | 6055308 | 75450  | 1  | 9  | 3 | 0.5732208  | 0.05670724 | 6 | 5 | 0.04875589 | 0.45545077 |
| chr12 | 6055308 | 6147946 | 92639  | 3  | 10 | 3 | 0.74627054 | 0.05670724 | 6 | 5 | 0.02793176 | 0.45545077 |
| chr12 | 6147946 | 6326781 | 178836 | 5  | 9  | 3 | 0.5732208  | 0.10122019 | 6 | 4 | 0.04875589 | 0.30102999 |
| chr12 | 6326781 | 6422116 | 95336  | 3  | 10 | 3 | 0.74627054 | 0.10122019 | 6 | 4 | 0.02793176 | 0.30102999 |
| chr12 | 6422116 | 6496043 | 73928  | 4  | 10 | 3 | 0.74627054 | 0.05670724 | 6 | 5 | 0.02793176 | 0.45545077 |
| chr12 | 6496043 | 6525364 | 29992  | 2  | 11 | 3 | 0.9449689  | 0.05670724 | 6 | 5 | 0.01548294 | 0.45545077 |
| chr12 | 6525364 | 6671514 | 145881 | 8  | 10 | 3 | 0.74627054 | 0.10122019 | 6 | 4 | 0.02793176 | 0.30102999 |
| chr12 | 6671514 | 6732736 | 61223  | 3  | 9  | 3 | 0.5732208  | 0.10122019 | 6 | 4 | 0.04875589 | 0.30102999 |
| chr12 | 6732736 | 6732795 | 60     | 1  | 10 | 3 | 0.74627054 | 0.10122019 | 6 | 4 | 0.02793176 | 0.30102999 |
| chr12 | 6732795 | 6796169 | 63375  | 4  | 9  | 3 | 0.5732208  | 0.10122019 | 6 | 4 | 0.04875589 | 0.30102999 |
| chr12 | 6796169 | 6857172 | 61004  | 2  | 9  | 2 | 0.5732208  | 0.0429175  | 6 | 4 | 0.04875589 | 0.47744371 |
| chr12 | 6857172 | 6857231 | 60     | 1  | 7  | 4 | 0.42015402 | 0.10122019 | 7 | 4 | 0.08584816 | 0.30102999 |
| chr12 | 6857231 | 6929708 | 72478  | 7  | 9  | 3 | 0.5732208  | 0.10122019 | 7 | 4 | 0.04875589 | 0.30102999 |
| chr12 | 6929708 | 7114197 | 184490 | 22 | 9  | 4 | 0.42015402 | 0.18734596 | 6 | 4 | 0.08584816 | 0.18734596 |
| chr12 | 7114197 | 7187618 | 73422  | 3  | 9  | 4 | 0.42015402 | 0.11390336 | 7 | 5 | 0.08584816 | 0.30102999 |
| chr12 | 7187618 | 7278289 | 90672  | 9  | 4  | 4 | 0.42015402 | 0.30102999 | 7 | 3 | 0.08584816 | 0.10122019 |
| chr12 | 7278289 | 7301110 | 22822  | 1  | 8  | 4 | 0.30102999 | 0.30102999 | 7 | 3 | 0.13499366 | 0.10122019 |
| chr12 | 7301110 | 7347854 | 46745  | 4  | 8  | 4 | 0.30102999 | 0.18734596 | 7 | 4 | 0.13499366 | 0.18734596 |
| chr12 | 7347854 | 7495496 | 147643 | 2  | 8  | 4 | 0.30102999 | 0.30102999 | 7 | 3 | 0.13499366 | 0.10122019 |
| chr12 | 7495496 | 7495555 | 60     | 1  | 4  | 4 | 0.30102999 | 0.18734596 | 7 | 4 | 0.13499366 | 0.18734596 |
| chr12 | 7495555 | 7550952 | 55398  | 2  | 8  | 2 | 0.30102999 | 0.08289318 | 7 | 3 | 0.13499366 | 0.30102999 |
| chr12 | 7550952 | 7551009 | 58     | 1  | 8  | 4 | 0.30102999 | 0.18734596 | 7 | 4 | 0.13499366 | 0.18734596 |
| chr12 | 7551009 | 7586015 | 35007  | 1  | 8  | 2 | 0.30102999 | 0.08289318 | 7 | 3 | 0.13499366 | 0.30102999 |
| chr12 | 7586015 | 7653675 | 67661  | 2  | 8  | 1 | 0.30102999 | 0.02438896 | 7 | 3 | 0.13499366 | 0.51676182 |
| chr12 | 7653675 | 7712397 | 58723  | 2  | 8  | 2 | 0.30102999 | 0.08289318 | 7 | 3 | 0.13499366 | 0.30102999 |
| chr12 | 7712397 | 7805008 | 92612  | 1  | 7  | 3 | 0.20469099 | 0.08289318 | 7 | 3 | 0.20469099 | 0.30102999 |
| chr12 | 7805008 | 7817151 | 12144  | 2  | 7  | 2 | 0.13499366 | 0.08289318 | 8 | 3 | 0.30102999 | 0.30102999 |
| chr12 | 7817151 | 7817210 | 60     | 1  | 7  | 3 | 0.13499366 | 0.17593012 | 8 | 3 | 0.30102999 | 0.17593012 |
| chr12 | 7817210 | 7886957 | 69748  | 4  | 7  | 2 | 0.13499366 | 0.08289318 | 8 | 3 | 0.30102999 | 0.30102999 |
| chr12 | 7886957 | 7900049 | 13093  | 2  | 7  | 4 | 0.13499366 | 0.10122019 | 8 | 4 | 0.30102999 | 0.30102999 |
| chr12 | 7900049 | 7945970 | 45922  | 1  | 6  | 3 | 0.08122616 | 0.17593012 | 8 | 3 | 0.4250187  | 0.17593012 |
| chr12 | 7945970 | 7985489 | 39520  | 1  | 6  | 1 | 0.08122616 | 0.02438896 | 8 |   |            |            |

|       |          |          |        |    |   |   |            |            |    |   |            |            |
|-------|----------|----------|--------|----|---|---|------------|------------|----|---|------------|------------|
| chr12 | 9913160  | 9984895  | 71736  | 1  | 5 | 0 | 0.0066683  | 0          | 11 | 2 | 1.20557689 | 0.61140001 |
| chr12 | 9984895  | 10039266 | 54372  | 3  | 5 | 3 | 0.0066683  | 0.17593012 | 11 | 3 | 1.20557689 | 0.17593012 |
| chr12 | 10039266 | 10039325 | 60     | 1  | 5 | 5 | 0.0066683  | 0.30102999 | 11 | 4 | 1.20557689 | 0.11390336 |
| chr12 | 10039325 | 10101899 | 62575  | 1  | 5 | 4 | 0.0066683  | 0.18734596 | 11 | 4 | 1.20557689 | 0.18734596 |
| chr12 | 10101899 | 10137505 | 35607  | 3  | 5 | 6 | 0.0066683  | 0.44141547 | 11 | 4 | 1.20557689 | 0.06713722 |
| chr12 | 10137505 | 10151724 | 14220  | 1  | 4 | 6 | 0.00247414 | 0.44141547 | 11 | 4 | 1.52371709 | 0.06713722 |
| chr12 | 10151724 | 10162062 | 10339  | 2  | 4 | 7 | 0.00247414 | 0.60763643 | 11 | 4 | 1.52371709 | 0.03812622 |
| chr12 | 10162062 | 10164583 | 2522   | 1  | 4 | 5 | 0.00247414 | 0.30102999 | 11 | 4 | 1.52371709 | 0.11390336 |
| chr12 | 10164583 | 10242688 | 78106  | 1  | 4 | 5 | 0.00247414 | 0.45545077 | 11 | 3 | 1.52371709 | 0.05670724 |
| chr12 | 10242688 | 10467296 | 224609 | 7  | 4 | 6 | 0.00247414 | 0.63695542 | 11 | 3 | 1.52371709 | 0.03070643 |
| chr12 | 10467296 | 10467355 | 60     | 1  | 4 | 6 | 0.00247414 | 0.44141547 | 11 | 4 | 1.52371709 | 0.06713722 |
| chr12 | 10467355 | 10511649 | 44295  | 1  | 4 | 6 | 0.00247414 | 0.63695542 | 11 | 3 | 1.52371709 | 0.03070643 |
| chr12 | 10511649 | 10562264 | 50616  | 1  | 4 | 6 | 0.00247414 | 0.91219088 | 11 | 2 | 1.52371709 | 0.01053319 |
| chr12 | 10562264 | 10602776 | 40513  | 4  | 4 | 6 | 0.00247414 | 0.63695542 | 11 | 3 | 1.52371709 | 0.03070643 |
| chr12 | 10602776 | 10662648 | 59873  | 2  | 4 | 6 | 0.00247414 | 0.91219088 | 11 | 2 | 1.52371709 | 0.01053319 |
| chr12 | 10662648 | 10789795 | 127148 | 4  | 4 | 6 | 0.00247414 | 0.44141547 | 11 | 4 | 1.52371709 | 0.06713722 |
| chr12 | 10789795 | 10826880 | 37086  | 1  | 4 | 5 | 0.00247414 | 0.30102999 | 11 | 4 | 1.52371709 | 0.11390336 |
| chr12 | 10826880 | 10872197 | 45318  | 2  | 4 | 4 | 0.00247414 | 0.18734596 | 11 | 4 | 1.52371709 | 0.18734596 |
| chr12 | 10872197 | 10954311 | 82115  | 1  | 4 | 4 | 0.00247414 | 0.30102999 | 11 | 3 | 1.52371709 | 0.10122019 |
| chr12 | 10954311 | 10958642 | 4332   | 1  | 3 | 4 | 7.28E-04   | 0.30102999 | 11 | 3 | 1.91540774 | 0.10122019 |
| chr12 | 10958642 | 10958701 | 60     | 1  | 3 | 4 | 7.28E-04   | 0.18734596 | 11 | 4 | 1.91540774 | 0.18734596 |
| chr12 | 10958701 | 10958960 | 260    | 1  | 3 | 4 | 0.00170589 | 0.18734596 | 10 | 4 | 1.61091002 | 0.18734596 |
| chr12 | 10958960 | 10961831 | 2872   | 2  | 4 | 4 | 0.00530919 | 0.18734596 | 10 | 4 | 1.2568129  | 0.18734596 |
| chr12 | 10961831 | 10978139 | 16309  | 2  | 4 | 4 | 0.00247414 | 0.18734596 | 11 | 4 | 1.52371709 | 0.18734596 |
| chr12 | 10978139 | 11061373 | 83235  | 2  | 4 | 3 | 0.00247414 | 0.17593012 | 11 | 3 | 1.52371709 | 0.17593012 |
| chr12 | 11061373 | 11091279 | 29907  | 1  | 4 | 4 | 0.00247414 | 0.10122019 | 11 | 4 | 1.52371709 | 0.30102999 |
| chr12 | 11091279 | 11091338 | 60     | 1  | 4 | 5 | 0.00247414 | 0.30102999 | 11 | 4 | 1.52371709 | 0.11390336 |
| chr12 | 11091338 | 11149738 | 58401  | 2  | 4 | 3 | 0.00247414 | 0.10122019 | 11 | 4 | 1.52371709 | 0.30102999 |
| chr12 | 11149738 | 11212877 | 63140  | 2  | 4 | 2 | 0.00247414 | 0.08289318 | 11 | 3 | 1.52371709 | 0.30102999 |
| chr12 | 11212877 | 11331053 | 118177 | 2  | 4 | 1 | 0.00247414 | 0.0243896  | 11 | 3 | 1.52371709 | 0.51676182 |
| chr12 | 11331053 | 11331112 | 60     | 1  | 4 | 2 | 0.00247414 | 0.08289318 | 11 | 3 | 1.52371709 | 0.30102999 |
| chr12 | 11331112 | 11421447 | 90336  | 1  | 4 | 2 | 0.00530919 | 0.08289318 | 10 | 3 | 1.2568129  | 0.30102999 |
| chr12 | 11421447 | 11496728 | 75282  | 2  | 4 | 3 | 0.00530919 | 0.10122019 | 10 | 4 | 1.2568129  | 0.30102999 |
| chr12 | 11496728 | 11496787 | 60     | 1  | 4 | 4 | 0.00247414 | 0.18734596 | 11 | 4 | 1.52371709 | 0.18734596 |
| chr12 | 11496787 | 11539679 | 42893  | 1  | 4 | 4 | 0.00530919 | 0.18734596 | 10 | 4 | 1.2568129  | 0.18734596 |
| chr12 | 11539679 | 11787045 | 247367 | 3  | 4 | 2 | 0.00530919 | 0.08289318 | 10 | 3 | 1.2568129  | 0.30102999 |
| chr12 | 11787045 | 11787104 | 60     | 1  | 4 | 2 | 0.00530919 | 0.0429175  | 10 | 4 | 1.2568129  | 0.47744371 |
| chr12 | 11787104 | 11861203 | 74100  | 1  | 4 | 2 | 0.00530919 | 0.08289318 | 10 | 3 | 1.2568129  | 0.30102999 |
| chr12 | 11861203 | 11896528 | 35326  | 2  | 4 | 3 | 0.00530919 | 0.17593012 | 10 | 3 | 1.2568129  | 0.17593012 |
| chr12 | 11896528 | 11896587 | 60     | 1  | 5 | 4 | 0.01032036 | 0.30102999 | 10 | 3 | 0.97390707 | 0.10122019 |
| chr12 | 11896587 | 11956206 | 59620  | 1  | 4 | 4 | 0.00530919 | 0.30102999 | 10 | 3 | 1.2568129  | 0.10122019 |
| chr12 | 11956206 | 12006403 | 50198  | 2  | 4 | 4 | 0.00530919 | 0.11390336 | 10 | 5 | 1.2568129  | 0.30102999 |
| chr12 | 12006403 | 12074651 | 68249  | 2  | 3 | 3 | 0.00170589 | 0.10122019 | 10 | 4 | 1.61091002 | 0.30102999 |
| chr12 | 12074651 | 12094530 | 19880  | 1  | 3 | 3 | 0.00170589 | 0.17593012 | 10 | 3 | 1.61091002 | 0.17593012 |
| chr12 | 12094530 | 12172284 | 77755  | 1  | 3 | 3 | 0.00378107 | 0.17593012 | 9  | 3 | 1.33111237 | 0.17593012 |
| chr12 | 12172284 | 12172343 | 60     | 1  | 3 | 3 | 0.00378107 | 0.10122019 | 9  | 4 | 1.33111237 | 0.30102999 |
| chr12 | 12172343 | 12356229 | 183887 | 5  | 3 | 3 | 0.00378107 | 0.17593012 | 9  | 3 | 1.33111237 | 0.17593012 |
| chr12 | 12356229 | 12397221 | 40993  | 2  | 3 | 3 | 0.00378107 | 0.10122019 | 9  | 4 | 1.33111237 | 0.30102999 |
| chr12 | 12397221 | 12397280 | 60     | 1  | 3 | 3 | 0.00170589 | 0.10122019 | 10 | 4 | 1.61091002 | 0.30102999 |
| chr12 | 12397280 | 12436291 | 39012  | 1  | 3 | 3 | 0.00170589 | 0.17593012 | 10 | 3 | 1.61091002 | 0.17593012 |
| chr12 | 12436291 | 12549605 | 113315 | 5  | 3 | 3 | 0.00170589 | 0.10122019 | 10 | 4 | 1.61091002 | 0.30102999 |
| chr12 | 12549605 | 12653165 | 103561 | 4  | 3 | 3 | 0.00170589 | 0.05670724 | 10 | 4 | 1.61091002 | 0.45545077 |
| chr12 | 12653165 | 12918924 | 265760 | 9  | 3 | 4 | 0.00170589 | 0.11390336 | 10 | 5 | 1.61091002 | 0.30102999 |
| chr12 | 12918924 | 12982882 | 63959  | 4  | 3 | 5 | 0.00170589 | 0.19510895 | 10 | 5 | 1.61091002 | 0.19510895 |
| chr12 | 12982882 | 13013713 | 30832  | 1  | 3 | 4 | 0.00170589 | 0.11390336 | 10 | 5 | 1.61091002 | 0.30102999 |
| chr12 | 13013713 | 13013772 | 60     | 1  | 3 | 4 | 0.00170589 | 0.06713722 | 10 | 6 | 1.61091002 | 0.44141547 |
| chr12 | 13013772 | 13066504 | 52733  | 1  | 3 | 4 | 0.00378107 | 0.06713722 | 9  | 6 | 1.33111237 | 0.44141547 |
| chr12 | 13066504 | 13066563 | 60     | 1  | 3 | 5 | 0.00378107 | 0.12309572 | 9  | 6 | 1.33111237 | 0.30102999 |
| chr12 | 13066563 | 13240987 | 174425 | 4  | 3 | 5 | 0.0079614  | 0.12309572 | 8  | 6 | 1.07548421 | 0.30102999 |
| chr12 | 13240987 | 13418897 | 179111 | 4  | 3 | 5 | 0.01598258 | 0.12309572 | 7  | 6 | 0.84395715 | 0.30102999 |
| chr12 | 13418897 | 13525405 | 106509 | 1  | 3 | 4 | 0.01598258 | 0.18734596 | 7  | 4 | 0.84395715 | 0.18734596 |
| chr12 | 13525405 | 13529105 | 3701   | 2  | 3 | 4 | 0.0079614  | 0.18734596 | 8  | 4 | 1.07548421 | 0.18734596 |
| chr12 | 13529105 | 13656811 | 127707 | 2  | 2 | 4 | 0.00221948 | 0.18734596 | 8  | 4 | 1.44210395 | 0.18734596 |
| chr12 | 13656811 | 13656870 | 60     | 1  | 2 | 5 | 0.00221948 | 0.30102999 | 8  | 4 | 1.44210395 | 0.11390336 |
| chr12 | 13656870 | 13715102 | 58233  | 1  | 1 | 5 | 3.39E-04   | 0.30102999 | 8  | 4 | 1.94674965 | 0.11390336 |
| chr12 | 13715102 | 13828818 | 11317  | 4  | 1 | 5 | 1.20E-04   | 0.30102999 | 9  | 4 | 2.2926207  | 0.11390336 |
| chr12 | 13828818 | 13906859 | 78042  | 1  | 1 | 4 | 8.47E-04   | 0.30102999 | 7  | 4 | 1.62048027 | 0.11390336 |
| chr12 | 13906859 | 13975539 | 68681  | 1  | 1 | 4 | 8.47E-04   | 0.18734596 | 7  | 4 | 1.62048027 | 0.18734596 |
| chr12 | 13975539 | 13975598 | 60     | 1  | 1 | 4 | 3.9E-04    | 0.06713722 | 8  | 6 | 1.94674965 | 0.44141547 |
| chr12 | 13975598 | 14030273 | 54676  | 1  | 1 | 4 | 3.9E-04    | 0.11390336 | 8  | 5 | 1.94674965 | 0.30102999 |
| chr12 | 14030273 | 14132896 | 102624 | 3  | 1 | 4 | 1.30E-04   | 0.11390336 | 9  | 5 | 2.2926207  | 0.30102999 |
| chr12 | 14132896 | 14572563 | 439668 | 5  | 1 | 4 | 8.47E-04   | 0.11390336 | 7  | 5 | 1.62048027 | 0.30102999 |
| chr12 | 14572563 | 15066956 | 494394 | 23 | 1 | 5 | 8.47E-04   | 0.19510895 | 7  | 5 | 1.62048027 | 0.19510895 |
| chr12 | 15066956 | 15114530 | 47575  | 4  | 1 | 5 | 3.9E-04    | 0.19510895 | 8  | 5 | 1.94674965 | 0.19510895 |
| chr12 | 15114530 | 15129429 | 14900  | 2  | 1 | 5 | 1.30E-04   | 0.12309572 | 6  | 2 | 2.2926207  | 0.30102999 |
| chr12 | 15129429 | 15150448 | 21020  | 1  | 1 | 5 | 1.30E-04   | 0.19510895 | 9  | 5 | 2.2926207  | 0.19510895 |
| chr12 | 15150448 | 15278488 | 128041 | 2  | 1 | 5 | 1.30E-04   | 0.30102999 | 9  | 4 | 2.2926207  | 0.11390336 |
| chr12 | 15278488 | 15470171 | 191684 | 4  | 1 | 4 | 1.30E-04   | 0.18734596 | 9  | 4 | 2.2926207  | 0.18734596 |
| chr12 | 15470171 | 15489311 | 19141  | 1  | 1 | 5 | 1.30E-04   | 0.30102999 | 9  | 4 | 2.2926207  | 0.11390336 |
| chr12 | 15489311 | 15550885 | 61575  | 1  | 1 | 5 | 3.9E-04    | 0.30102999 | 8  | 4 | 1.94674965 | 0.11390336 |
| chr12 | 15550885 | 15550944 | 60     | 1  | 1 | 5 | 3.9E-04    | 0.12309572 | 6  | 2 | 1.94674965 | 0.30102999 |
| chr12 | 15550944 | 15598419 | 47476  | 1  | 1 | 4 | 3.9E-04    | 0.06713722 | 6  | 4 | 1.94674965 | 0.44141547 |
| chr12 | 15598419 | 15704539 | 106121 | 2  | 1 | 4 | 3.9E-04    | 0.18734596 | 8  | 4 | 1.94674965 | 0.18734596 |
| chr12 | 15704539 | 15749687 | 45149  | 2  | 1 | 4 | 1.30E-04   | 0.18734596 | 9  | 4 | 2.2926207  | 0.18734596 |
| chr12 | 15749687 | 15749746 | 60     | 1  | 1 | 4 | 1.30E-04   | 0.11390336 | 9  | 5 | 2.2926207  | 0.30102999 |
| chr12 | 15749746 | 15774015 | 24270  | 1  | 1 | 4 | 3.9E-04    | 0.11390336 | 8  | 5 | 1.94674965 | 0.30102999 |
| chr12 | 15774015 | 15834131 | 60117  | 1  | 1 | 4 | 3.9E-04    | 0.18734596 | 8  | 4 | 1.94674965 | 0.18734596 |
| chr12 | 15834131 | 15908518 | 74388  | 3  | 1 | 4 | 3.9E-04    | 0.11390336 | 8  | 5 | 1.94674965 | 0.30102999 |
| chr12 | 15908518 | 15908577 | 60     | 1  | 1 | 4 | 3.9E-04    | 0.06713722 | 8  | 6 | 1.94674965 | 0.44141547 |
| chr12 | 15908577 | 15940945 | 32369  | 1  | 1 | 4 |            |            |    |   |            |            |

|       |          |          |        |   |   |   |            |            |    |   |            |            |
|-------|----------|----------|--------|---|---|---|------------|------------|----|---|------------|------------|
| chr12 | 19459675 | 19459728 | 54     | 1 | 3 | 2 | 0.03070643 | 0.1575501  | 6  | 2 | 0.63695542 | 0.1575501  |
| chr12 | 19459728 | 19525493 | 65766  | 1 | 2 | 1 | 0.01053319 | 0.1218695  | 6  | 1 | 0.91219088 | 0.1218695  |
| chr12 | 19525493 | 19602761 | 77269  | 2 | 1 | 1 | 0.00478973 | 0.1218695  | 5  | 1 | 1.02643191 | 0.1218695  |
| chr12 | 19602761 | 19602820 | 60     | 1 | 2 | 2 | 0.01053319 | 0.1575501  | 6  | 2 | 0.91219088 | 0.1575501  |
| chr12 | 19602820 | 19615573 | 12754  | 1 | 1 | 1 | 0.00478973 | 0.1218695  | 5  | 1 | 1.02643191 | 0.1218695  |
| chr12 | 19615573 | 19744674 | 129102 | 2 | 0 | 1 | 0          | 0.1218695  | 5  | 1 | 1.60515106 | 0.1218695  |
| chr12 | 19744674 | 19875175 | 130502 | 2 | 0 | 2 | 0          | 0.1575501  | 5  | 2 | 1.60515106 | 0.1575501  |
| chr12 | 19875175 | 19875234 | 60     | 1 | 0 | 3 | 0          | 0.30102999 | 5  | 2 | 1.60515106 | 0.08289318 |
| chr12 | 19875234 | 20038565 | 163332 | 1 | 0 | 2 | 0          | 0.30102999 | 5  | 1 | 1.60515106 | 0.05404976 |
| chr12 | 20038565 | 20038624 | 60     | 1 | 1 | 2 | 0.00478973 | 0.1575501  | 5  | 2 | 1.02643191 | 0.1575501  |
| chr12 | 20038624 | 20210481 | 171858 | 2 | 1 | 2 | 0.00478973 | 0.30102999 | 5  | 1 | 1.02643191 | 0.05404976 |
| chr12 | 20210481 | 20210540 | 60     | 1 | 1 | 3 | 0.00478973 | 0.51676182 | 5  | 1 | 1.02643191 | 0.02438896 |
| chr12 | 20210540 | 20410956 | 200417 | 1 | 1 | 2 | 0.00478973 | 0.30102999 | 5  | 1 | 1.02643191 | 0.05404976 |
| chr12 | 20410956 | 20547035 | 136080 | 2 | 2 | 2 | 0.02162467 | 0.30102999 | 5  | 1 | 0.68214471 | 0.05404976 |
| chr12 | 20547035 | 20547094 | 60     | 1 | 2 | 3 | 0.02162467 | 0.51676182 | 5  | 1 | 0.68214471 | 0.02438896 |
| chr12 | 20547094 | 20643583 | 96490  | 2 | 1 | 3 | 0.00478973 | 0.51676182 | 5  | 1 | 1.02643191 | 0.02438896 |
| chr12 | 20643583 | 20874888 | 231306 | 5 | 1 | 3 | 0.00478973 | 0.30102999 | 5  | 2 | 1.02643191 | 0.08289318 |
| chr12 | 20874888 | 20951594 | 76707  | 3 | 1 | 4 | 0.00478973 | 0.47744371 | 5  | 2 | 1.02643191 | 0.0429175  |
| chr12 | 20951594 | 20968685 | 17092  | 2 | 1 | 4 | 0.00204627 | 0.47744371 | 6  | 2 | 1.31360226 | 0.0429175  |
| chr12 | 20968685 | 21069145 | 100461 | 2 | 1 | 4 | 0.00204627 | 0.76005302 | 6  | 1 | 1.31360226 | 0.01091641 |
| chr12 | 21069145 | 21261409 | 192255 | 4 | 1 | 4 | 0.00204627 | 0.47744371 | 6  | 2 | 1.31360226 | 0.0429175  |
| chr12 | 21261409 | 21326191 | 64773  | 3 | 1 | 6 | 8.47E-04   | 0.91219088 | 7  | 2 | 1.62048027 | 0.01053319 |
| chr12 | 21326191 | 21427381 | 101201 | 2 | 1 | 5 | 0.00204627 | 0.68214471 | 7  | 2 | 1.31360226 | 0.02162467 |
| chr12 | 21427381 | 21445371 | 17991  | 2 | 2 | 5 | 0.00493743 | 0.45545077 | 7  | 3 | 1.16581773 | 0.05670724 |
| chr12 | 21445371 | 21531577 | 86207  | 4 | 2 | 5 | 3.90E-04   | 0.45545077 | 10 | 3 | 2.0620585  | 0.05670724 |
| chr12 | 21531577 | 21532429 | 853    | 2 | 2 | 8 | 3.90E-04   | 1.07548421 | 10 | 3 | 2.0620585  | 0.0079614  |
| chr12 | 21532429 | 21636284 | 103856 | 2 | 2 | 5 | 3.90E-04   | 0.45545077 | 10 | 3 | 2.0620585  | 0.05670724 |
| chr12 | 21636284 | 21661429 | 25146  | 2 | 2 | 7 | 3.90E-04   | 0.84395715 | 10 | 3 | 2.0620585  | 0.01598258 |
| chr12 | 21661429 | 21689158 | 27730  | 3 | 3 | 7 | 0.00170589 | 0.84395715 | 10 | 3 | 1.61091002 | 0.01598258 |
| chr12 | 21689158 | 21741592 | 52435  | 3 | 2 | 6 | 3.90E-04   | 0.63695542 | 10 | 3 | 2.0620585  | 0.03070643 |
| chr12 | 21741592 | 21787942 | 46351  | 1 | 2 | 5 | 3.90E-04   | 0.45545077 | 10 | 3 | 2.0620585  | 0.05670724 |
| chr12 | 21787942 | 21852627 | 64686  | 1 | 2 | 4 | 3.90E-04   | 0.30102999 | 10 | 3 | 2.0620585  | 0.10122019 |
| chr12 | 21852627 | 21852686 | 60     | 1 | 3 | 5 | 0.00170589 | 0.45545077 | 10 | 3 | 1.61091002 | 0.05670724 |
| chr12 | 21852686 | 22017368 | 164683 | 4 | 2 | 5 | 3.90E-04   | 0.45545077 | 10 | 3 | 2.0620585  | 0.05670724 |
| chr12 | 22017368 | 22017427 | 60     | 1 | 3 | 5 | 7.28E-04   | 0.45545077 | 11 | 3 | 1.91540774 | 0.05670724 |
| chr12 | 22017427 | 22069981 | 52555  | 1 | 3 | 5 | 0.00170589 | 0.45545077 | 10 | 3 | 1.61091002 | 0.05670724 |
| chr12 | 22069981 | 22089612 | 19632  | 2 | 3 | 6 | 0.00170589 | 0.63695542 | 10 | 3 | 1.61091002 | 0.03070643 |
| chr12 | 22089612 | 22204517 | 114906 | 1 | 3 | 5 | 0.00170589 | 0.45545077 | 10 | 3 | 1.61091002 | 0.05670724 |
| chr12 | 22204517 | 22239923 | 35407  | 3 | 3 | 5 | 7.28E-04   | 0.45545077 | 11 | 3 | 1.91540774 | 0.05670724 |
| chr12 | 22239923 | 22401995 | 162073 | 2 | 3 | 4 | 7.28E-04   | 0.30102999 | 11 | 3 | 1.91540774 | 0.10122019 |
| chr12 | 22401995 | 22440065 | 38071  | 2 | 3 | 5 | 7.28E-04   | 0.45545077 | 11 | 3 | 1.91540774 | 0.05670724 |
| chr12 | 22440065 | 22440123 | 59     | 1 | 3 | 6 | 7.28E-04   | 0.63695542 | 11 | 3 | 1.91540774 | 0.03070643 |
| chr12 | 22440123 | 22478115 | 37993  | 1 | 3 | 6 | 7.28E-04   | 0.91219088 | 11 | 2 | 1.91540774 | 0.01053319 |
| chr12 | 22478115 | 22506561 | 28447  | 1 | 2 | 6 | 1.52E-04   | 0.91219088 | 11 | 2 | 2.40668355 | 0.01053319 |
| chr12 | 22506561 | 22602778 | 96218  | 1 | 2 | 5 | 1.52E-04   | 0.68214471 | 11 | 2 | 2.40668355 | 0.02162467 |
| chr12 | 22602778 | 22627734 | 24957  | 2 | 2 | 4 | 1.52E-04   | 0.45545077 | 11 | 3 | 2.40668355 | 0.05670724 |
| chr12 | 22627734 | 22674213 | 46480  | 2 | 2 | 4 | 1.52E-04   | 0.47744371 | 11 | 2 | 2.40668355 | 0.0429175  |
| chr12 | 22674213 | 22694990 | 20778  | 2 | 2 | 4 | 1.52E-04   | 0.30102999 | 11 | 3 | 2.40668355 | 0.10122019 |
| chr12 | 22694990 | 22695049 | 60     | 1 | 3 | 4 | 7.28E-04   | 0.30102999 | 11 | 3 | 1.91540774 | 0.10122019 |
| chr12 | 22695049 | 22784758 | 89710  | 2 | 2 | 3 | 3.90E-04   | 0.17593012 | 10 | 3 | 2.0620585  | 0.17593012 |
| chr12 | 22784758 | 22838216 | 53459  | 3 | 2 | 2 | 9.54E-04   | 0.08289318 | 9  | 3 | 1.74076927 | 0.30102999 |
| chr12 | 22838216 | 22892201 | 53986  | 2 | 2 | 3 | 3.90E-04   | 0.17593012 | 10 | 3 | 2.0620585  | 0.17593012 |
| chr12 | 22892201 | 23011040 | 118840 | 1 | 2 | 2 | 9.54E-04   | 0.08289318 | 9  | 3 | 1.74076927 | 0.30102999 |
| chr12 | 23011040 | 23155279 | 144240 | 1 | 1 | 2 | 1.30E-04   | 0.02438896 | 9  | 3 | 2.29264207 | 0.51676182 |
| chr12 | 23155279 | 23265912 | 110634 | 1 | 1 | 1 | 1.30E-04   | 0.05404976 | 9  | 2 | 2.29264207 | 0.30102999 |
| chr12 | 23265912 | 23386854 | 120943 | 1 | 1 | 1 | 1.30E-04   | 0.1218695  | 9  | 1 | 2.29264207 | 0.1218695  |
| chr12 | 23386854 | 23386913 | 60     | 1 | 1 | 2 | 1.30E-04   | 0.1575501  | 9  | 2 | 2.29264207 | 0.1575501  |
| chr12 | 23386913 | 23488498 | 101586 | 1 | 1 | 1 | 3.99E-04   | 0.1218695  | 8  | 1 | 1.94674965 | 0.1218695  |
| chr12 | 23488498 | 23488557 | 60     | 1 | 1 | 1 | 3.99E-04   | 0.05404976 | 8  | 2 | 1.94674965 | 0.30102999 |
| chr12 | 23488557 | 23685603 | 197047 | 1 | 1 | 0 | 3.99E-04   | 0          | 8  | 1 | 1.94674965 | 0.30102999 |
| chr12 | 23685603 | 23685662 | 60     | 1 | 2 | 0 | 0.00221948 | 0          | 8  | 1 | 1.44210395 | 0.30102999 |
| chr12 | 23685662 | 23807580 | 121919 | 2 | 2 | 0 | 0.00493743 | 0          | 7  | 1 | 1.16581773 | 0.30102999 |
| chr12 | 23807580 | 23807639 | 60     | 1 | 2 | 1 | 0.00493743 | 0.1218695  | 7  | 1 | 1.16581773 | 0.1218695  |
| chr12 | 23807639 | 23854642 | 47004  | 1 | 2 | 0 | 0.00493743 | 0          | 7  | 1 | 1.16581773 | 0.30102999 |
| chr12 | 23854642 | 23904524 | 49883  | 1 | 1 | 0 | 8.47E-04   | 0          | 7  | 1 | 1.62048027 | 0.30102999 |
| chr12 | 23904524 | 24023758 | 118235 | 3 | 1 | 1 | 8.47E-04   | 0.1218695  | 7  | 1 | 1.62048027 | 0.1218695  |
| chr12 | 24023758 | 24023817 | 60     | 1 | 2 | 1 | 0.00493743 | 0.05404976 | 7  | 2 | 1.16581773 | 0.30102999 |
| chr12 | 24023817 | 24102502 | 79686  | 2 | 1 | 1 | 8.47E-04   | 0.1218695  | 7  | 1 | 1.62048027 | 0.1218695  |
| chr12 | 24102502 | 24283358 | 190857 | 4 | 2 | 1 | 0.00493743 | 0.1218695  | 7  | 1 | 1.16581773 | 0.1218695  |
| chr12 | 24283358 | 24389848 | 106491 | 4 | 2 | 2 | 0.00493743 | 0.30102999 | 7  | 1 | 1.16581773 | 0.05404976 |
| chr12 | 24389848 | 24489386 | 99539  | 3 | 2 | 2 | 0.00493743 | 0.1575501  | 7  | 2 | 1.16581773 | 0.1575501  |
| chr12 | 24489386 | 24554915 | 65530  | 1 | 1 | 2 | 8.47E-04   | 0.1575501  | 7  | 2 | 1.62048027 | 0.1575501  |
| chr12 | 24554915 | 24607065 | 52151  | 2 | 2 | 1 | 1.30E-04   | 0.1575501  | 9  | 2 | 2.29264207 | 0.1575501  |
| chr12 | 24607065 | 24607124 | 60     | 1 | 2 | 3 | 3.90E-04   | 0.30102999 | 10 | 2 | 2.0620585  | 0.08289318 |
| chr12 | 24607124 | 24729689 | 122566 | 3 | 1 | 3 | 4.80E-05   | 0.30102999 | 10 | 2 | 2.6588298  | 0.08289318 |
| chr12 | 24729689 | 24861225 | 131537 | 1 | 1 | 3 | 1.30E-04   | 0.30102999 | 9  | 2 | 2.29264207 | 0.08289318 |
| chr12 | 24861225 | 24861284 | 60     | 1 | 1 | 3 | 1.30E-04   | 0.17593012 | 9  | 3 | 2.29264207 | 0.17593012 |
| chr12 | 24861284 | 25027344 | 166601 | 3 | 1 | 2 | 1.30E-04   | 0.30102999 | 9  | 1 | 2.29264207 | 0.05404976 |
| chr12 | 25027344 | 25157644 | 130301 | 5 | 1 | 2 | 4.80E-05   | 0.30102999 | 10 | 1 | 2.6588298  | 0.05404976 |
| chr12 | 25157644 | 25157703 | 60     | 1 | 3 | 2 | 7.28E-04   | 0.30102999 | 11 | 1 | 1.91540774 | 0.05404976 |
| chr12 | 25157703 | 25242667 | 84965  | 2 | 2 | 2 | 3.90E-04   | 0.30102999 | 11 | 1 | 2.0620585  | 0.05404976 |
| chr12 | 25242667 | 25286243 | 43577  | 3 | 2 | 2 | 1.52E-04   | 0.30102999 | 11 | 1 | 2.40668355 | 0.05404976 |
| chr12 | 25286243 | 25348677 | 62435  | 2 | 2 | 2 | 7.28E-04   | 0.30102999 | 11 | 1 | 1.91540774 | 0.05404976 |
| chr12 | 25348677 | 25348736 | 60     | 1 | 3 | 3 | 7.28E-04   | 0.51676182 | 11 | 1 | 1.91540774 | 0.02438896 |
| chr12 | 25348736 | 25485811 | 137076 | 3 | 2 | 1 | 1.52E-04   | 0.30102999 | 11 | 1 | 2.40668355 | 0.05404976 |
| chr12 | 25485811 | 25577112 | 91302  | 4 | 3 | 2 | 7.28E-04   | 0.30102999 | 11 | 1 | 1.91540774 | 0.05404976 |
| chr12 | 25577112 | 25577171 | 60     | 1 | 3 | 2 | 7.28E-04   | 0.1575501  | 11 | 2 | 1.91540774 | 0.1575501  |
| chr12 | 25577171 | 25629086 | 51916  | 1 | 2 | 2 | 1.52E-04   | 0.1575501  | 11 | 2 | 2.40668355 | 0.1575501  |
| chr12 | 25629086 | 25737386 | 108301 | 5 | 2 | 1 | 1.52E-04   | 0.30102999 | 11 | 1 | 2.40668355 | 0.05404976 |
| chr12 | 25737386 | 25737445 | 60     | 1 | 2 | 3 | 1.52E-04   | 0.30102999 | 11 | 2 | 2.40668355 | 0.08289318 |
| chr12 | 25737445 | 25944355 | 206911 | 2 | 3 | 2 | 1.52E-04   |            |    |   |            |            |

|       |          |          |        |   |   |   |            |            |    |   |            |            |
|-------|----------|----------|--------|---|---|---|------------|------------|----|---|------------|------------|
| chr12 | 28903466 | 29329868 | 426403 | 3 | 1 | 0 | 1.30E-04   | 0          | 9  | 1 | 2.29264207 | 0.30102999 |
| chr12 | 29329868 | 29423538 | 93671  | 2 | 1 | 0 | 3.39E-04   | 0          | 8  | 1 | 1.94674965 | 0.30102999 |
| chr12 | 29423538 | 29423589 | 52     | 1 | 1 | 0 | 1.30E-04   | 0          | 9  | 1 | 2.29264207 | 0.30102999 |
| chr12 | 29423589 | 29532012 | 108424 | 4 | 1 | 0 | 3.39E-04   | 0          | 8  | 1 | 1.94674965 | 0.30102999 |
| chr12 | 29532012 | 29575283 | 43272  | 1 | 1 | 0 | 0.00204627 | 0          | 6  | 1 | 1.31360226 | 0.30102999 |
| chr12 | 29575283 | 29813762 | 238480 | 6 | 1 | 0 | 0.01091641 | 0          | 4  | 1 | 0.76005302 | 0.30102999 |
| chr12 | 29813762 | 29886957 | 73196  | 3 | 1 | 0 | 0.00478973 | 0          | 5  | 1 | 1.02643191 | 0.30102999 |
| chr12 | 29886957 | 29914459 | 27503  | 1 | 1 | 0 | 0.01091641 | 0          | 4  | 1 | 0.76005302 | 0.30102999 |
| chr12 | 29914459 | 30013033 | 98575  | 2 | 1 | 0 | 0.00478973 | 0          | 5  | 1 | 1.02643191 | 0.30102999 |
| chr12 | 30013033 | 30013092 | 60     | 1 | 1 | 0 | 1.30E-04   | 0          | 9  | 1 | 2.29264207 | 0.30102999 |
| chr12 | 30013092 | 30218673 | 205582 | 1 | 1 | 0 | 3.39E-04   | 0          | 8  | 1 | 1.94674965 | 0.30102999 |
| chr12 | 30218673 | 30590907 | 372235 | 2 | 1 | 0 | 8.47E-04   | 0          | 7  | 0 | 1.62048027 | 0          |
| chr12 | 30590907 | 30833491 | 242585 | 4 | 2 | 0 | 0.00493743 | 0          | 7  | 0 | 1.16581773 | 0          |
| chr12 | 30833491 | 31157095 | 323605 | 7 | 2 | 0 | 0.00221948 | 0          | 8  | 0 | 1.44210395 | 0          |
| chr12 | 31157095 | 31157154 | 60     | 1 | 2 | 0 | 0.00221948 | 0          | 8  | 2 | 1.44210395 | 0.61140001 |
| chr12 | 31157154 | 31241554 | 84401  | 1 | 2 | 0 | 0.00221948 | 0          | 8  | 1 | 1.44210395 | 0.30102999 |
| chr12 | 31241554 | 31313985 | 72432  | 1 | 2 | 0 | 0.00221948 | 0          | 8  | 0 | 1.44210395 | 0          |
| chr12 | 31313985 | 31356945 | 42961  | 2 | 2 | 0 | 0.00221948 | 0          | 8  | 1 | 1.44210395 | 0.30102999 |
| chr12 | 31356945 | 31357004 | 60     | 1 | 2 | 0 | 9.54E-04   | 0          | 9  | 1 | 1.74076927 | 0.30102999 |
| chr12 | 31357004 | 31408631 | 51628  | 1 | 2 | 0 | 0.00221948 | 0          | 8  | 1 | 1.44210395 | 0.30102999 |
| chr12 | 31408631 | 31477869 | 69239  | 3 | 2 | 0 | 0.00221948 | 0          | 8  | 2 | 1.44210395 | 0.61140001 |
| chr12 | 31477869 | 31542346 | 64478  | 1 | 2 | 0 | 0.00493743 | 0          | 7  | 2 | 1.16581773 | 0.61140001 |
| chr12 | 31542346 | 31579238 | 36889  | 2 | 2 | 0 | 0.00221948 | 0          | 8  | 2 | 1.44210395 | 0.61140001 |
| chr12 | 31579238 | 31739139 | 159902 | 6 | 2 | 0 | 9.54E-04   | 0          | 9  | 2 | 1.74076927 | 0.61140001 |
| chr12 | 31739139 | 31739198 | 60     | 1 | 3 | 0 | 0.00378107 | 0          | 9  | 2 | 1.33111237 | 0.61140001 |
| chr12 | 31739198 | 31819003 | 79806  | 1 | 3 | 0 | 0.00378107 | 0          | 9  | 1 | 1.33111237 | 0.30102999 |
| chr12 | 31819003 | 31933396 | 114394 | 4 | 4 | 0 | 0.01077081 | 0          | 9  | 1 | 1.01542894 | 0.30102999 |
| chr12 | 31933396 | 31933455 | 60     | 1 | 3 | 0 | 0.04875589 | 0          | 9  | 1 | 0.5732208  | 0.30102999 |
| chr12 | 31933455 | 32049529 | 116075 | 1 | 5 | 0 | 0.02473314 | 0          | 9  | 1 | 0.76808664 | 0.30102999 |
| chr12 | 32049529 | 32049588 | 60     | 1 | 5 | 0 | 0.01320236 | 0          | 10 | 1 | 0.97390707 | 0.30102999 |
| chr12 | 32049588 | 32145402 | 95815  | 2 | 4 | 0 | 0.01077081 | 0          | 9  | 1 | 1.01542894 | 0.30102999 |
| chr12 | 32145402 | 32208785 | 63384  | 1 | 3 | 0 | 0.00378107 | 0          | 9  | 1 | 1.33111237 | 0.30102999 |
| chr12 | 32208785 | 32325075 | 116291 | 5 | 3 | 0 | 0.00170589 | 0          | 10 | 1 | 1.61091029 | 0.30102999 |
| chr12 | 32325075 | 32325134 | 60     | 1 | 4 | 0 | 0.00530919 | 0          | 10 | 1 | 1.2568112  | 0.30102999 |
| chr12 | 38572677 | 38956458 | 383782 | 5 | 0 | 1 | 0          | 0.1218695  | 1  | 1 | 0.30102999 | 0.1218695  |
| chr12 | 38956458 | 39045475 | 89018  | 2 | 0 | 3 | 0          | 0.30102999 | 2  | 2 | 0.30102999 | 0.08289318 |
| chr12 | 39045475 | 39114179 | 68705  | 3 | 0 | 3 | 0          | 0.30102999 | 2  | 2 | 0.61140001 | 0.08289318 |
| chr12 | 39114179 | 39114238 | 60     | 1 | 3 | 0 | 0          | 0.30102999 | 3  | 2 | 0.93173516 | 0.08289318 |
| chr12 | 39114238 | 39223163 | 108926 | 2 | 0 | 2 | 0          | 0.1575501  | 2  | 2 | 0.61140001 | 0.1575501  |
| chr12 | 39223163 | 39223222 | 60     | 1 | 0 | 4 | 0          | 0.47744371 | 2  | 2 | 0.61140001 | 0.0429175  |
| chr12 | 39223222 | 39268243 | 45022  | 1 | 0 | 2 | 0          | 0.1575501  | 2  | 2 | 0.61140001 | 0.1575501  |
| chr12 | 39268243 | 39300994 | 32752  | 2 | 1 | 2 | 0.02438896 | 0.1575501  | 3  | 2 | 0.51676182 | 0.1575501  |
| chr12 | 39300994 | 39487447 | 186454 | 1 | 2 | 2 | 0.05404976 | 0.1575501  | 2  | 2 | 0.30102999 | 0.1575501  |
| chr12 | 39487447 | 39703409 | 215963 | 3 | 1 | 4 | 0.02438896 | 0.30102999 | 3  | 3 | 0.51676182 | 0.10122019 |
| chr12 | 39703409 | 39788009 | 84601  | 4 | 1 | 4 | 0.02438896 | 0.18734596 | 3  | 4 | 0.51676182 | 0.18734596 |
| chr12 | 39788009 | 39788068 | 60     | 1 | 4 | 4 | 0.01091641 | 0.18734596 | 4  | 4 | 0.76005302 | 0.18734596 |
| chr12 | 39788068 | 39947362 | 159295 | 3 | 1 | 4 | 0.02438896 | 0.18734596 | 3  | 4 | 0.51676182 | 0.18734596 |
| chr12 | 39947362 | 39947421 | 60     | 1 | 4 | 4 | 0.02438896 | 0.11390336 | 3  | 5 | 0.51676182 | 0.30102999 |
| chr12 | 39947421 | 40041709 | 94289  | 4 | 1 | 4 | 0.02438896 | 0.18734596 | 3  | 4 | 0.51676182 | 0.18734596 |
| chr12 | 40041709 | 40115015 | 73307  | 2 | 1 | 3 | 0.05404976 | 0.10122019 | 2  | 4 | 0.30102999 | 0.30102999 |
| chr12 | 40115015 | 40223970 | 108956 | 4 | 1 | 3 | 0.02438896 | 0.10122019 | 3  | 4 | 0.51676182 | 0.30102999 |
| chr12 | 40223970 | 40250897 | 26928  | 2 | 1 | 4 | 0.02438896 | 0.11390336 | 3  | 5 | 0.51676182 | 0.30102999 |
| chr12 | 40250897 | 40315362 | 64466  | 1 | 1 | 3 | 0.02438896 | 0.10122019 | 3  | 4 | 0.51676182 | 0.30102999 |
| chr12 | 40315362 | 40344515 | 29154  | 1 | 3 | 3 | 0.02438896 | 0.17593012 | 3  | 3 | 0.51676182 | 0.17593012 |
| chr12 | 40344515 | 40344574 | 60     | 1 | 1 | 4 | 0.02438896 | 0.18734596 | 3  | 4 | 0.51676182 | 0.18734596 |
| chr12 | 40344574 | 40419588 | 75015  | 2 | 1 | 3 | 0.02438896 | 0.17593012 | 3  | 3 | 0.51676182 | 0.17593012 |
| chr12 | 40419588 | 40452621 | 33034  | 2 | 1 | 4 | 0.02438896 | 0.11390336 | 3  | 5 | 0.51676182 | 0.30102999 |
| chr12 | 40452621 | 40733081 | 280461 | 5 | 1 | 3 | 0.02438896 | 0.10122019 | 3  | 4 | 0.51676182 | 0.30102999 |
| chr12 | 40733081 | 40733140 | 60     | 1 | 1 | 3 | 0.02438896 | 0.05670724 | 3  | 4 | 0.51676182 | 0.45545077 |
| chr12 | 40733140 | 40805728 | 72589  | 1 | 1 | 3 | 0.02438896 | 0.10122019 | 3  | 4 | 0.51676182 | 0.30102999 |
| chr12 | 40805728 | 40923915 | 118188 | 1 | 1 | 3 | 0.02438896 | 0.17593012 | 3  | 3 | 0.51676182 | 0.17593012 |
| chr12 | 40923915 | 40980309 | 56395  | 2 | 1 | 3 | 0.02438896 | 0.10122019 | 3  | 3 | 0.51676182 | 0.30102999 |
| chr12 | 40980309 | 40980368 | 60     | 1 | 1 | 5 | 0.02438896 | 0.19510895 | 3  | 5 | 0.51676182 | 0.19510895 |
| chr12 | 40980368 | 41155891 | 175524 | 2 | 1 | 3 | 0.02438896 | 0.10122019 | 3  | 4 | 0.51676182 | 0.30102999 |
| chr12 | 41155891 | 41223674 | 67784  | 1 | 1 | 3 | 0.02438896 | 0.17593012 | 3  | 3 | 0.51676182 | 0.17593012 |
| chr12 | 41223674 | 41223733 | 60     | 1 | 1 | 3 | 0.02438896 | 0.10122019 | 3  | 4 | 0.51676182 | 0.30102999 |
| chr12 | 41223733 | 41410563 | 186831 | 4 | 1 | 3 | 0.05404976 | 0.10122019 | 2  | 4 | 0.30102999 | 0.30102999 |
| chr12 | 41410563 | 41410622 | 60     | 1 | 1 | 4 | 0.05404976 | 0.18734596 | 2  | 2 | 0.30102999 | 0.18734596 |
| chr12 | 41410622 | 41591398 | 180777 | 2 | 1 | 3 | 0.05404976 | 0.10122019 | 2  | 4 | 0.30102999 | 0.30102999 |
| chr12 | 41591398 | 41634141 | 42744  | 2 | 2 | 4 | 0.1575501  | 0.18734596 | 2  | 2 | 0.1575501  | 0.18734596 |
| chr12 | 41634141 | 41784743 | 150603 | 2 | 2 | 3 | 0.1575501  | 0.17593012 | 2  | 3 | 0.1575501  | 0.17593012 |
| chr12 | 41784743 | 42020829 | 236087 | 9 | 2 | 4 | 0.1575501  | 0.06713722 | 2  | 6 | 0.1575501  | 0.44141547 |
| chr12 | 42020829 | 42086874 | 66046  | 2 | 2 | 4 | 0.1575501  | 0.03812622 | 2  | 7 | 0.1575501  | 0.60763643 |
| chr12 | 42086874 | 42192473 | 105600 | 1 | 2 | 3 | 0.1575501  | 0.01598258 | 1  | 7 | 0.1575501  | 0.84395715 |
| chr12 | 42192473 | 42715330 | 522858 | 8 | 2 | 3 | 0.30102999 | 0.02589258 | 1  | 7 | 0.05404976 | 0.84395715 |
| chr12 | 42715330 | 42841139 | 125810 | 7 | 2 | 3 | 0.1575501  | 0.01598258 | 2  | 7 | 0.1575501  | 0.84395715 |
| chr12 | 42841139 | 42908419 | 67281  | 3 | 2 | 4 | 0.1575501  | 0.03812622 | 2  | 7 | 0.1575501  | 0.60763643 |
| chr12 | 42908419 | 42945214 | 36796  | 2 | 2 | 5 | 0.08289318 | 0.07511598 | 3  | 7 | 0.30102999 | 0.43181735 |
| chr12 | 42945214 | 42982703 | 37490  | 1 | 2 | 3 | 0.08289318 | 0.03070643 | 3  | 6 | 0.30102999 | 0.63695542 |
| chr12 | 42982703 | 43042145 | 59443  | 1 | 2 | 3 | 0.08289318 | 0.05670724 | 3  | 5 | 0.30102999 | 0.45545077 |
| chr12 | 43042145 | 43252854 | 210710 | 1 | 1 | 3 | 0.02438896 | 0.05670724 | 3  | 5 | 0.51676182 | 0.45545077 |
| chr12 | 43252854 | 43469733 | 216880 | 2 | 1 | 5 | 0.02438896 | 0.12309572 | 3  | 6 | 0.51676182 | 0.30102999 |
| chr12 | 43469733 | 43469792 | 60     | 1 | 1 | 5 | 0.01091641 | 0.12309572 | 4  | 6 | 0.76005302 | 0.30102999 |
| chr12 | 43469792 | 43665574 | 195783 | 1 | 1 | 4 | 0.01091641 | 0.06713722 | 4  | 6 | 0.76005302 | 0.44141547 |
| chr12 | 43665574 | 43665633 | 60     | 1 | 1 | 5 | 0.01091641 | 0.07511598 | 4  | 7 | 0.76005302 | 0.43181735 |
| chr12 | 43665633 | 43715233 | 49601  | 1 | 1 | 5 | 0.02438896 | 0.12309572 | 3  | 6 | 0.51676182 | 0.30102999 |
| chr12 | 43715233 | 43785504 | 70272  | 1 | 1 | 5 | 0.02438896 | 0.19510895 | 3  | 5 | 0.51676182 | 0.19510895 |
| chr12 | 43785504 | 43925990 | 140487 | 4 | 1 | 4 | 0.02438896 | 0.11390336 | 3  | 5 | 0.51676182 | 0.30102999 |
| chr12 | 43925990 | 44051706 | 125717 | 1 | 0 | 4 | 0          | 0.11390336 | 1  | 5 | 0.30102999 | 0.30102999 |
| chr12 | 44051706 | 44130156 | 78451  | 2 | 0 | 5 | 0          | 0.19510895 | 1  | 5 | 0.30102999 | 0.19510895 |
| chr12 | 44130156 | 44199504 | 69349  | 4 | 0 | 5 | 0          | 0.19510895 | 2  | 5 | 0.61140001 | 0.19510895 |
| chr12 | 44199504 | 44268498 | 68995  | 2 | 0 | 5 | 0          | 0.19510895 | 1  | 5 | 0.30102999 | 0.19510895 |
| chr12 | 44268498 | 44414180 | 145683 | 2 | 0 | 5 |            |            |    |   |            |            |

|       |          |          |        |   |   |    |            |            |   |    |            |            |
|-------|----------|----------|--------|---|---|----|------------|------------|---|----|------------|------------|
| chr12 | 47095745 | 47159051 | 63307  | 1 | 0 | 5  | 0          | 0.45545077 | 0 | 3  | 0          | 0.05670724 |
| chr12 | 47159051 | 47199194 | 40144  | 3 | 0 | 5  | 0          | 0.19510895 | 0 | 5  | 0          | 0.19510895 |
| chr12 | 47199194 | 47199253 | 60     | 1 | 0 | 5  | 0          | 0.12309572 | 0 | 6  | 0          | 0.30102999 |
| chr12 | 47199253 | 47226633 | 27381  | 2 | 0 | 5  | 0          | 0.30102999 | 0 | 4  | 0          | 0.11390336 |
| chr12 | 47226633 | 47575626 | 348994 | 5 | 0 | 5  | 0          | 0.45545077 | 0 | 3  | 0          | 0.05670724 |
| chr12 | 47575626 | 47766396 | 190771 | 5 | 0 | 5  | 0          | 0.30102999 | 0 | 4  | 0          | 0.11390336 |
| chr12 | 47766396 | 47964348 | 197953 | 2 | 0 | 5  | 0          | 0.19510895 | 0 | 5  | 0          | 0.19510895 |
| chr12 | 47964348 | 47964407 | 60     | 1 | 0 | 5  | 0          | 0.12309572 | 0 | 6  | 0          | 0.30102999 |
| chr12 | 47964407 | 48057274 | 92868  | 1 | 0 | 5  | 0          | 0.19510895 | 0 | 5  | 0          | 0.19510895 |
| chr12 | 48057274 | 48231230 | 173957 | 9 | 0 | 5  | 0          | 0.12309572 | 0 | 6  | 0          | 0.30102999 |
| chr12 | 48231230 | 48361276 | 130047 | 4 | 0 | 5  | 0          | 0.07511598 | 0 | 7  | 0          | 0.43181735 |
| chr12 | 48361276 | 48438902 | 77627  | 2 | 0 | 6  | 0          | 0.08122616 | 0 | 8  | 0          | 0.4250187  |
| chr12 | 48438902 | 48438961 | 60     | 1 | 0 | 7  | 0          | 0.08584816 | 0 | 9  | 0          | 0.42015402 |
| chr12 | 48438961 | 48469308 | 30348  | 1 | 0 | 6  | 0          | 0.04875589 | 0 | 9  | 0          | 0.5732208  |
| chr12 | 48469308 | 48520388 | 51081  | 1 | 0 | 6  | 0          | 0.129913   | 0 | 7  | 0          | 0.30102999 |
| chr12 | 48520388 | 48536470 | 16083  | 2 | 0 | 7  | 0          | 0.13499366 | 0 | 8  | 0          | 0.30102999 |
| chr12 | 48536470 | 48590234 | 53765  | 3 | 0 | 8  | 0          | 0.13872638 | 1 | 9  | 0.30102999 | 0.30102999 |
| chr12 | 48590234 | 48590293 | 60     | 1 | 0 | 9  | 0          | 0.20975986 | 1 | 9  | 0.30102999 | 0.20975986 |
| chr12 | 48590293 | 48840127 | 249835 | 6 | 0 | 9  | 0          | 0.30102999 | 0 | 8  | 0.30102999 | 0.13872638 |
| chr12 | 48840127 | 48962985 | 122859 | 4 | 0 | 9  | 0          | 0.14135546 | 1 | 10 | 0.30102999 | 0.30102999 |
| chr12 | 48962985 | 49014226 | 51242  | 1 | 0 | 9  | 0          | 0.20975986 | 0 | 9  | 0.30102999 | 0.20975986 |
| chr12 | 49014226 | 49054353 | 40128  | 2 | 0 | 8  | 0          | 0.13872638 | 1 | 9  | 0.30102999 | 0.30102999 |
| chr12 | 49054353 | 49054402 | 50     | 1 | 0 | 9  | 0          | 0.20975986 | 0 | 1  | 0.30102999 | 0.20975986 |
| chr12 | 49054402 | 49105346 | 50945  | 1 | 0 | 9  | 0          | 0.13872638 | 1 | 9  | 0.30102999 | 0.30102999 |
| chr12 | 49105346 | 49105405 | 60     | 1 | 0 | 8  | 0          | 0.08923391 | 1 | 10 | 0.30102999 | 0.4167287  |
| chr12 | 49105405 | 49160576 | 55172  | 1 | 0 | 8  | 0          | 0.13872638 | 1 | 9  | 0.30102999 | 0.30102999 |
| chr12 | 49160576 | 49231884 | 71309  | 4 | 0 | 9  | 0          | 0.20975986 | 0 | 9  | 0.30102999 | 0.20975986 |
| chr12 | 49231884 | 49250950 | 19067  | 2 | 0 | 9  | 0          | 0.20975986 | 0 | 9  | 0.30102999 | 0.20975986 |
| chr12 | 49250950 | 49362697 | 111748 | 8 | 0 | 9  | 0          | 0.20975986 | 1 | 9  | 0.30102999 | 0.20975986 |
| chr12 | 49362697 | 49416083 | 53387  | 5 | 0 | 9  | 0          | 0.14135546 | 1 | 10 | 0.30102999 | 0.30102999 |
| chr12 | 49416083 | 49416142 | 60     | 1 | 0 | 10 | 0          | 0.21118145 | 1 | 10 | 0.30102999 | 0.21118145 |
| chr12 | 49416142 | 49523562 | 107421 | 7 | 0 | 9  | 0          | 0.14135546 | 1 | 10 | 0.30102999 | 0.30102999 |
| chr12 | 49523562 | 49609243 | 85682  | 3 | 0 | 8  | 0          | 0.08923391 | 1 | 10 | 0.30102999 | 0.4167287  |
| chr12 | 49609243 | 49663205 | 53963  | 1 | 0 | 8  | 0          | 0.13872638 | 1 | 9  | 0.30102999 | 0.30102999 |
| chr12 | 49663205 | 49718188 | 54984  | 2 | 0 | 8  | 0          | 0.13872638 | 0 | 9  | 0.30102999 | 0.30102999 |
| chr12 | 49718188 | 49742919 | 24732  | 2 | 0 | 8  | 0          | 0.13872638 | 1 | 9  | 0.30102999 | 0.30102999 |
| chr12 | 49742919 | 49811367 | 68449  | 3 | 0 | 9  | 0          | 0.20975986 | 1 | 9  | 0.30102999 | 0.20975986 |
| chr12 | 49811367 | 49961110 | 149744 | 3 | 0 | 8  | 0          | 0.13872638 | 1 | 9  | 0.30102999 | 0.30102999 |
| chr12 | 49961110 | 49961169 | 60     | 1 | 0 | 9  | 0          | 0.20975986 | 1 | 9  | 0.30102999 | 0.20975986 |
| chr12 | 49961169 | 50029208 | 68040  | 3 | 0 | 8  | 0          | 0.13872638 | 1 | 9  | 0.30102999 | 0.30102999 |
| chr12 | 50029208 | 50035882 | 6675   | 2 | 0 | 9  | 0          | 0.20975986 | 1 | 9  | 0.30102999 | 0.20975986 |
| chr12 | 50035882 | 50233858 | 197977 | 6 | 0 | 8  | 0          | 0.20764654 | 1 | 8  | 0.30102999 | 0.20764654 |
| chr12 | 50233858 | 50287672 | 53815  | 3 | 0 | 8  | 0          | 0.13872638 | 1 | 9  | 0.30102999 | 0.30102999 |
| chr12 | 50287672 | 50370433 | 82762  | 3 | 0 | 8  | 0          | 0.20764654 | 1 | 8  | 0.30102999 | 0.20764654 |
| chr12 | 50370433 | 50542991 | 172559 | 8 | 0 | 7  | 0          | 0.13499366 | 1 | 8  | 0.30102999 | 0.30102999 |
| chr12 | 50542991 | 50598439 | 55449  | 2 | 0 | 6  | 0          | 0.129913   | 1 | 7  | 0.30102999 | 0.30102999 |
| chr12 | 50598439 | 50598494 | 56     | 1 | 0 | 6  | 0          | 0.08122616 | 1 | 8  | 0.30102999 | 0.4250187  |
| chr12 | 50598494 | 50642487 | 43994  | 2 | 0 | 6  | 0          | 0.07511598 | 1 | 7  | 0.30102999 | 0.43181735 |
| chr12 | 50642487 | 50668737 | 26251  | 2 | 0 | 6  | 0          | 0.08122616 | 1 | 8  | 0.30102999 | 0.4250187  |
| chr12 | 50668737 | 50795637 | 126901 | 2 | 0 | 4  | 0          | 0.02074938 | 1 | 8  | 0.30102999 | 0.79906872 |
| chr12 | 50795637 | 50834358 | 38722  | 2 | 1 | 5  | 0.1218695  | 0.02473314 | 1 | 9  | 0.1218695  | 0.76806864 |
| chr12 | 50834358 | 50943505 | 109148 | 3 | 1 | 5  | 0.1218695  | 0.04407651 | 1 | 8  | 0.1218695  | 0.58747015 |
| chr12 | 50943505 | 50943564 | 60     | 1 | 1 | 5  | 0.1218695  | 0.02473314 | 1 | 9  | 0.1218695  | 0.76806864 |
| chr12 | 50943564 | 51013428 | 69865  | 1 | 1 | 5  | 0.1218695  | 0.07511598 | 1 | 7  | 0.1218695  | 0.43181735 |
| chr12 | 51013428 | 51013487 | 60     | 1 | 1 | 6  | 0.1218695  | 0.129913   | 1 | 7  | 0.1218695  | 0.30102999 |
| chr12 | 51013487 | 51189671 | 176185 | 4 | 1 | 4  | 0.1218695  | 0.03812622 | 1 | 7  | 0.1218695  | 0.60763643 |
| chr12 | 51189671 | 51207680 | 18010  | 2 | 1 | 5  | 0.1218695  | 0.04407651 | 1 | 8  | 0.1218695  | 0.58747015 |
| chr12 | 51207680 | 51252857 | 45178  | 3 | 1 | 6  | 0.1218695  | 0.08122616 | 1 | 8  | 0.1218695  | 0.4250187  |
| chr12 | 51252857 | 51273429 | 20573  | 1 | 1 | 5  | 0.1218695  | 0.07511598 | 1 | 7  | 0.1218695  | 0.43181735 |
| chr12 | 51273429 | 51347228 | 73800  | 2 | 1 | 5  | 0.1218695  | 0.12309572 | 1 | 6  | 0.1218695  | 0.30102999 |
| chr12 | 51347228 | 51393125 | 45898  | 2 | 1 | 4  | 0.1218695  | 0.06713722 | 1 | 6  | 0.1218695  | 0.44141547 |
| chr12 | 51393125 | 51398738 | 5614   | 2 | 1 | 4  | 0.05404976 | 0.03812622 | 2 | 7  | 0.30102999 | 0.60763643 |
| chr12 | 51398738 | 51449739 | 51002  | 4 | 1 | 4  | 0.05404976 | 0.06713722 | 2 | 6  | 0.30102999 | 0.44141547 |
| chr12 | 51449739 | 51467129 | 17391  | 1 | 0 | 4  | 0          | 0.06713722 | 2 | 6  | 0.6114001  | 0.44141547 |
| chr12 | 51467129 | 51467188 | 60     | 1 | 0 | 5  | 0          | 0          | 2 | 6  | 0.6114001  | 0.30102999 |
| chr12 | 51467188 | 51517194 | 50007  | 1 | 0 | 5  | 0          | 0.19510895 | 2 | 5  | 0.6114001  | 0.19510895 |
| chr12 | 51517194 | 51517253 | 60     | 1 | 0 | 5  | 0          | 0.30102999 | 2 | 5  | 0.6114001  | 0.12309572 |
| chr12 | 51517253 | 51554319 | 37067  | 1 | 0 | 5  | 0          | 0.19510895 | 2 | 5  | 0.6114001  | 0.19510895 |
| chr12 | 51554319 | 51635922 | 81604  | 2 | 0 | 4  | 0          | 0.11390336 | 2 | 5  | 0.6114001  | 0.30102999 |
| chr12 | 51635922 | 51675447 | 39526  | 3 | 0 | 5  | 0          | 0.19510895 | 2 | 5  | 0.6114001  | 0.19510895 |
| chr12 | 51675447 | 51700726 | 25280  | 2 | 0 | 6  | 0          | 0.20064824 | 2 | 6  | 0.6114001  | 0.20064824 |
| chr12 | 51700726 | 51784685 | 83960  | 4 | 0 | 6  | 0          | 0.20064824 | 1 | 6  | 0.30102999 | 0.20064824 |
| chr12 | 51784685 | 51928346 | 143662 | 6 | 0 | 6  | 0          | 0.20064824 | 2 | 6  | 0.6114001  | 0.20064824 |
| chr12 | 51928346 | 52022746 | 94401  | 2 | 0 | 6  | 0          | 0.20064824 | 2 | 6  | 0.30102999 | 0.20064824 |
| chr12 | 52022746 | 52055275 | 32530  | 1 | 0 | 5  | 0          | 0.12309572 | 1 | 6  | 0.30102999 | 0.30102999 |
| chr12 | 52055275 | 52055334 | 60     | 1 | 0 | 6  | 0          | 0.20064824 | 1 | 6  | 0.30102999 | 0.20064824 |
| chr12 | 52055334 | 52093520 | 38187  | 1 | 0 | 5  | 0          | 0.12309572 | 1 | 6  | 0.30102999 | 0.30102999 |
| chr12 | 52093520 | 52093579 | 60     | 1 | 0 | 6  | 0          | 0.20064824 | 1 | 6  | 0.30102999 | 0.20064824 |
| chr12 | 52093579 | 52173991 | 80413  | 2 | 0 | 5  | 0          | 0.12309572 | 1 | 6  | 0.30102999 | 0.30102999 |
| chr12 | 52173991 | 52204405 | 30415  | 2 | 0 | 5  | 0          | 0.04407651 | 1 | 8  | 0.30102999 | 0.58747015 |
| chr12 | 52204405 | 52282085 | 77681  | 2 | 0 | 6  | 0          | 0.08122616 | 1 | 8  | 0.30102999 | 0.4250187  |
| chr12 | 52282085 | 52282133 | 49     | 1 | 0 | 6  | 0          | 0.04875589 | 1 | 9  | 0.30102999 | 0.5732208  |
| chr12 | 52282133 | 52347032 | 64900  | 2 | 0 | 6  | 0          | 0.08122616 | 1 | 8  | 0.30102999 | 0.4250187  |
| chr12 | 52347032 | 52347091 | 60     | 1 | 0 | 7  | 0          | 0.05232577 | 1 | 10 | 0.30102999 | 0.56314362 |
| chr12 | 52347091 | 52389883 | 42793  | 2 | 0 | 6  | 0          | 0.02793176 | 1 | 10 | 0.30102999 | 0.74627054 |
| chr12 | 52389883 | 52407286 | 17404  | 1 | 0 | 5  | 0          | 0.01320236 | 1 | 10 | 0.30102999 | 0.97390707 |
| chr12 | 52407286 | 52407338 | 53     | 1 | 0 | 7  | 0          | 0.05232577 | 1 | 10 | 0.30102999 | 0.56314362 |
| chr12 | 52407338 | 52442652 | 35315  | 1 | 0 | 6  | 0          | 0.02793176 | 1 | 10 | 0.30102999 | 0.74627054 |
| chr12 | 52442652 | 52442711 | 60     | 1 | 0 | 7  | 0          | 0.05232577 | 1 | 10 | 0.30102999 | 0.56314362 |
| chr12 | 52442711 | 52469962 | 27252  | 2 | 0 | 6  | 0          | 0.02793176 | 1 | 10 | 0.30102999 | 0.74627054 |
| chr12 | 52469962 | 52529221 | 59260  | 2 | 0 | 7  | 0          | 0.05232577 | 1 | 10 | 0.30102999 | 0.56314362 |
| chr12 | 52529221 | 52680482 | 151262 | 3 | 0 | 6  | 0          | 0.02793176 | 1 | 10 | 0.30102999 | 0.74627054 |
| chr12 | 52680482 | 52700536 | 20055  | 2 | 0 | 8  | 0          | 0.08923391 | 1 | 10 | 0.30102999 | 0.4167287  |
| chr12 | 52700536 | 52713895 | 13360  | 1 | 0 | 6  | 0          | 0.02793176 | 1 | 10 | 0.30102999 | 0.74627054 |
| chr12 | 52713895 | 52754572 | 40678  | 2 | 0 | 7  | 0          | 0.05232577 | 1 | 10 | 0.30102999 | 0.56314362 |
| chr12 | 52754572 | 52776216 | 21645  | 1 | 0 | 6  | 0          | 0.02793176 | 1 | 10 | 0.3        |            |

|       |          |          |        |    |   |   |            |            |    |    |            |            |
|-------|----------|----------|--------|----|---|---|------------|------------|----|----|------------|------------|
| chr12 | 53963041 | 54069290 | 106250 | 2  | 0 | 6 | 0          | 0.00778066 | 0  | 12 | 0          | 1.17038931 |
| chr12 | 54069290 | 54106700 | 37411  | 2  | 0 | 7 | 0          | 0.01667721 | 1  | 12 | 0.30102999 | 0.92532268 |
| chr12 | 54106700 | 54118309 | 11610  | 1  | 0 | 6 | 0          | 0.00778066 | 1  | 12 | 0.30102999 | 1.17038931 |
| chr12 | 54118309 | 54337791 | 219483 | 2  | 0 | 4 | 0          | 0.00247414 | 1  | 11 | 0.30102999 | 1.52371709 |
| chr12 | 54337791 | 54396400 | 58610  | 4  | 0 | 4 | 0          | 0.00247414 | 0  | 11 | 0          | 1.52371709 |
| chr12 | 54396400 | 54396459 | 60     | 1  | 0 | 6 | 0          | 0.00778066 | 0  | 12 | 0          | 1.17038931 |
| chr12 | 54396459 | 54429108 | 32650  | 3  | 0 | 5 | 0          | 0.00666883 | 0  | 11 | 0          | 1.20557689 |
| chr12 | 54429108 | 54442906 | 13799  | 2  | 0 | 7 | 0          | 0.01667721 | 0  | 12 | 0          | 0.92532268 |
| chr12 | 54442906 | 54442965 | 60     | 1  | 0 | 7 | 0          | 0.00859896 | 0  | 13 | 0          | 1.14735594 |
| chr12 | 54442965 | 54530640 | 87676  | 1  | 0 | 6 | 0          | 0.00778066 | 0  | 12 | 0          | 1.17038931 |
| chr12 | 54530640 | 54575481 | 44842  | 2  | 0 | 7 | 0          | 0.01667721 | 0  | 12 | 0          | 0.92532268 |
| chr12 | 54575481 | 54582494 | 7014   | 2  | 0 | 7 | 0          | 0.00859896 | 0  | 13 | 0          | 1.14735594 |
| chr12 | 54582494 | 54675533 | 93040  | 2  | 0 | 7 | 0          | 0.01667721 | 0  | 12 | 0          | 0.92532268 |
| chr12 | 54675533 | 54675592 | 60     | 1  | 0 | 7 | 0          | 0.00859896 | 0  | 13 | 0          | 1.14735594 |
| chr12 | 54675592 | 54686583 | 10992  | 1  | 0 | 7 | 0          | 0.01667721 | 0  | 12 | 0          | 0.92532268 |
| chr12 | 54686583 | 54695092 | 8510   | 1  | 0 | 7 | 0          | 0.03037338 | 0  | 11 | 0          | 0.73110763 |
| chr12 | 54695092 | 54727548 | 32457  | 1  | 0 | 7 | 0          | 0.05232577 | 0  | 10 | 0          | 0.56314362 |
| chr12 | 54727548 | 54797056 | 69509  | 2  | 0 | 7 | 0          | 0.08584816 | 0  | 9  | 0          | 0.42015402 |
| chr12 | 54797056 | 54802911 | 5856   | 2  | 0 | 7 | 0          | 0.08584816 | 1  | 9  | 0.30102999 | 0.42015402 |
| chr12 | 54802911 | 54811394 | 8484   | 1  | 0 | 7 | 0          | 0.08584816 | 0  | 9  | 0          | 0.42015402 |
| chr12 | 54811394 | 54849918 | 38525  | 2  | 0 | 7 | 0          | 0.05232577 | 0  | 10 | 0          | 0.56314362 |
| chr12 | 54849918 | 54924352 | 74435  | 2  | 0 | 6 | 0          | 0.2064824  | 0  | 6  | 0          | 0.2064824  |
| chr12 | 54924352 | 54977322 | 52971  | 4  | 0 | 6 | 0          | 0.129913   | 0  | 7  | 0          | 0.30102999 |
| chr12 | 54977322 | 55025624 | 48303  | 2  | 0 | 6 | 0          | 0.129913   | 0  | 7  | 0.30102999 | 0.30102999 |
| chr12 | 55025624 | 55096397 | 70774  | 1  | 0 | 6 | 0          | 0.2064824  | 0  | 6  | 0          | 0.2064824  |
| chr12 | 55096397 | 55143242 | 46846  | 2  | 0 | 6 | 0          | 0.2064824  | 0  | 6  | 0.30102999 | 0.2064824  |
| chr12 | 55143242 | 55252039 | 108798 | 2  | 0 | 6 | 0          | 0.08122616 | 1  | 8  | 0.30102999 | 0.4250187  |
| chr12 | 55252039 | 55252083 | 45     | 2  | 0 | 6 | 0          | 0.04875589 | 1  | 9  | 0.30102999 | 0.5732208  |
| chr12 | 55252083 | 55252125 | 43     | 1  | 0 | 6 | 0          | 0.04875589 | 0  | 9  | 0          | 0.5732208  |
| chr12 | 55252125 | 55313965 | 61841  | 1  | 0 | 6 | 0          | 0.08122616 | 0  | 8  | 0          | 0.4250187  |
| chr12 | 55313965 | 55382872 | 68908  | 2  | 0 | 6 | 0          | 0.08122616 | 1  | 8  | 0.30102999 | 0.4250187  |
| chr12 | 55382872 | 55422496 | 39625  | 2  | 0 | 5 | 0          | 0.12309572 | 1  | 6  | 0.30102999 | 0.30102999 |
| chr12 | 55422496 | 55589411 | 166916 | 3  | 0 | 5 | 0          | 0.07511598 | 1  | 7  | 0.30102999 | 0.43181735 |
| chr12 | 55589411 | 55660047 | 70637  | 2  | 1 | 6 | 0.1218695  | 0.129913   | 7  | 7  | 0.1218695  | 0.30102999 |
| chr12 | 55660047 | 55710027 | 49981  | 2  | 1 | 6 | 0.1218695  | 0.08122616 | 8  | 8  | 0.1218695  | 0.4250187  |
| chr12 | 55710027 | 55746104 | 36078  | 1  | 1 | 6 | 0.1218695  | 0.129913   | 7  | 7  | 0.1218695  | 0.30102999 |
| chr12 | 55746104 | 55789222 | 43119  | 2  | 1 | 6 | 0.1218695  | 0.04875589 | 1  | 9  | 0.1218695  | 0.5732208  |
| chr12 | 55789222 | 55844393 | 55172  | 2  | 1 | 6 | 0.1218695  | 0.02793176 | 1  | 10 | 0.1218695  | 0.74627054 |
| chr12 | 55844393 | 55844452 | 60     | 1  | 1 | 6 | 0.1218695  | 0.00373523 | 13 | 13 | 0.1218695  | 1.42397267 |
| chr12 | 55844452 | 56004786 | 160335 | 3  | 1 | 6 | 0.1218695  | 0.00778066 | 1  | 12 | 0.1218695  | 1.17038931 |
| chr12 | 56004786 | 56075406 | 70621  | 1  | 1 | 6 | 0.1218695  | 0.01518174 | 1  | 11 | 0.1218695  | 0.9449689  |
| chr12 | 56075406 | 56119225 | 43820  | 5  | 1 | 7 | 0.1218695  | 0.03037338 | 11 | 11 | 0.1218695  | 0.73110763 |
| chr12 | 56119225 | 56426250 | 307026 | 22 | 1 | 7 | 0.1218695  | 0.01667721 | 12 | 12 | 0.1218695  | 0.92532268 |
| chr12 | 56426250 | 56489450 | 63201  | 2  | 1 | 6 | 0.1218695  | 0.01518174 | 1  | 11 | 0.1218695  | 0.9449689  |
| chr12 | 56489450 | 56578793 | 89344  | 12 | 1 | 6 | 0.1218695  | 0.00778066 | 1  | 12 | 0.1218695  | 1.17038931 |
| chr12 | 56578793 | 56578851 | 59     | 1  | 7 | 7 | 0.1218695  | 0.01667721 | 12 | 12 | 0.1218695  | 0.92532268 |
| chr12 | 56578851 | 56680966 | 102116 | 6  | 1 | 6 | 0.1218695  | 0.00778066 | 1  | 12 | 0.1218695  | 1.17038931 |
| chr12 | 56680966 | 56723019 | 42054  | 2  | 1 | 6 | 0.1218695  | 0.01518174 | 11 | 11 | 0.1218695  | 0.9449689  |
| chr12 | 56723019 | 56733252 | 10234  | 2  | 1 | 7 | 0.1218695  | 0.00859896 | 13 | 13 | 0.1218695  | 1.14735594 |
| chr12 | 56733252 | 56756476 | 23225  | 4  | 1 | 7 | 0.1218695  | 0.01667721 | 12 | 12 | 0.1218695  | 0.92532268 |
| chr12 | 56756476 | 56827732 | 71257  | 3  | 1 | 8 | 0.1218695  | 0.00909834 | 1  | 14 | 0.1218695  | 1.13428373 |
| chr12 | 56827732 | 56845465 | 17734  | 1  | 1 | 7 | 0.1218695  | 0.00859896 | 13 | 13 | 0.1218695  | 1.14735594 |
| chr12 | 56845465 | 56920218 | 74754  | 2  | 1 | 6 | 0.1218695  | 0.00373523 | 13 | 13 | 0.1218695  | 1.42397267 |
| chr12 | 56920218 | 56983285 | 63068  | 2  | 1 | 6 | 0.1218695  | 0.00166733 | 14 | 14 | 0.1218695  | 1.70763027 |
| chr12 | 56983285 | 57000485 | 17201  | 2  | 1 | 8 | 0.1218695  | 0.00909834 | 1  | 14 | 0.1218695  | 1.13428373 |
| chr12 | 57000485 | 57079947 | 79463  | 4  | 1 | 9 | 0.1218695  | 0.01817691 | 1  | 14 | 0.1218695  | 0.90719478 |
| chr12 | 57079947 | 57163276 | 83330  | 3  | 1 | 7 | 0.1218695  | 0.00859896 | 1  | 13 | 0.1218695  | 1.14735594 |
| chr12 | 57163276 | 57186362 | 23087  | 3  | 1 | 8 | 0.1218695  | 0.00433294 | 15 | 15 | 0.1218695  | 1.3873209  |
| chr12 | 57186362 | 57277655 | 91294  | 2  | 1 | 8 | 0.1218695  | 0.00909834 | 1  | 14 | 0.1218695  | 1.13428373 |
| chr12 | 57277655 | 57320764 | 43110  | 2  | 1 | 8 | 0.1218695  | 0.00433294 | 15 | 15 | 0.1218695  | 1.3873209  |
| chr12 | 57320764 | 57346683 | 29520  | 2  | 1 | 8 | 0.30102999 | 0.00433294 | 0  | 15 | 0          | 1.3873209  |
| chr12 | 57346683 | 57501246 | 154564 | 11 | 1 | 8 | 0.1218695  | 0.00433294 | 15 | 15 | 0.1218695  | 1.3873209  |
| chr12 | 57501246 | 57548099 | 46854  | 2  | 0 | 8 | 0          | 0.00433294 | 15 | 15 | 0.30102999 | 1.3873209  |
| chr12 | 57548099 | 57640685 | 92487  | 5  | 0 | 8 | 0          | 0.00909834 | 14 | 14 | 0.30102999 | 1.13428373 |
| chr12 | 57640685 | 57640685 | 50     | 1  | 0 | 8 | 0          | 0.00433294 | 15 | 15 | 0.30102999 | 1.3873209  |
| chr12 | 57640685 | 57682667 | 42034  | 2  | 0 | 8 | 0          | 0.00433294 | 0  | 15 | 0          | 1.3873209  |
| chr12 | 57682667 | 57735721 | 53055  | 3  | 0 | 8 | 0          | 0.00433294 | 1  | 15 | 0.30102999 | 1.3873209  |
| chr12 | 57735721 | 57969746 | 234026 | 18 | 0 | 8 | 0          | 0.00909834 | 1  | 14 | 0.30102999 | 1.13428373 |
| chr12 | 57969746 | 58025372 | 55627  | 8  | 0 | 8 | 0          | 0.01767679 | 1  | 13 | 0.30102999 | 0.91308053 |
| chr12 | 58025372 | 58163728 | 13857  | 12 | 0 | 7 | 0          | 0.00859896 | 1  | 13 | 0.30102999 | 1.14735594 |
| chr12 | 58163728 | 58167187 | 3460   | 2  | 1 | 7 | 0.1218695  | 0.00859896 | 1  | 13 | 0.1218695  | 1.14735594 |
| chr12 | 58167187 | 58216571 | 49385  | 3  | 0 | 6 | 0          | 0.00373523 | 1  | 13 | 0.30102999 | 1.42397267 |
| chr12 | 58216571 | 58299145 | 82575  | 3  | 0 | 7 | 0          | 0.00859896 | 1  | 13 | 0.30102999 | 1.14735594 |
| chr12 | 58299145 | 58369576 | 70432  | 4  | 0 | 6 | 0          | 0.00778066 | 1  | 12 | 0.30102999 | 1.17038931 |
| chr12 | 58369576 | 58513206 | 143631 | 1  | 0 | 6 | 0          | 0.01518174 | 1  | 11 | 0.30102999 | 0.9449689  |
| chr12 | 58513206 | 58591960 | 78755  | 1  | 0 | 6 | 0          | 0.02793176 | 1  | 10 | 0.30102999 | 0.74627054 |
| chr12 | 58591960 | 58592019 | 60     | 1  | 0 | 6 | 0          | 0.01518174 | 1  | 11 | 0.30102999 | 0.9449689  |
| chr12 | 58592019 | 58843780 | 251762 | 1  | 0 | 6 | 0          | 0.08122616 | 1  | 8  | 0.30102999 | 0.4250187  |
| chr12 | 58843780 | 58843839 | 60     | 1  | 0 | 6 | 0          | 0.04875589 | 2  | 9  | 0.6114001  | 0.5732208  |
| chr12 | 58843839 | 59075529 | 231691 | 2  | 0 | 5 | 0          | 0.12309572 | 1  | 6  | 0.30102999 | 0.30102999 |
| chr12 | 59075529 | 59075588 | 60     | 1  | 0 | 5 | 0          | 0.07511598 | 1  | 7  | 0.30102999 | 0.43181735 |
| chr12 | 59075588 | 59167152 | 91565  | 1  | 0 | 5 | 0          | 0.45545077 | 1  | 3  | 0.30102999 | 0.05670724 |
| chr12 | 59167152 | 59267874 | 100723 | 2  | 0 | 5 | 0          | 0.45545077 | 2  | 3  | 0.6114001  | 0.05670724 |
| chr12 | 59267874 | 59317231 | 49358  | 4  | 0 | 6 | 0          | 0.63695542 | 3  | 3  | 0.6114001  | 0.03070643 |
| chr12 | 59317231 | 59405526 | 88296  | 2  | 0 | 3 | 0          | 0.17593012 | 2  | 3  | 0.6114001  | 0.17593012 |
| chr12 | 59405526 | 59543464 | 137939 | 2  | 0 | 3 | 0          | 0.10122019 | 4  | 4  | 0.6114001  | 0.30102999 |
| chr12 | 59543464 | 59543523 | 60     | 1  | 0 | 5 | 0          | 0.30102999 | 3  | 4  | 0.93173516 | 0.11390336 |
| chr12 | 59543523 | 59635040 | 91518  | 1  | 0 | 5 | 0          | 0.68214471 | 3  | 2  | 0.93173516 | 0.02162467 |
| chr12 | 59635040 | 59635099 | 60     | 1  | 0 | 6 | 0          | 0.91219088 | 2  | 2  | 0.93173516 | 0.01053319 |
| chr12 | 59635099 | 59764149 | 129051 | 1  | 0 | 5 | 0          | 0.68214471 | 3  | 2  | 0.93173516 | 0.02162467 |
| chr12 | 59764149 | 59764208 | 60     | 1  | 0 | 5 | 0          | 0.45545077 | 3  | 3  | 0.93173516 | 0.05670724 |
| chr12 | 59764208 | 59906948 | 142741 | 1  | 0 | 5 | 0          | 0.68214471 | 3  | 2  | 0.93173516 | 0.02162467 |
| chr12 | 59906948 | 59976120 | 69173  | 2  | 0 | 5 | 0          | 0.45545077 | 3  | 3  | 0.93173516 | 0.05670724 |
| chr12 | 59976120 | 60083108 | 106989 | 2  | 0 | 4 | 0          | 0.47744371 | 2  | 2  | 0.6114001  | 0.0429175  |
| chr12 | 60083108 | 60152404 | 69297  | 4  | 0 | 5 | 0          | 0.45545077 | 3  | 3  | 0.93173516 | 0.05670724 |

|       |          |          |        |   |   |            |            |            |   |            |            |            |
|-------|----------|----------|--------|---|---|------------|------------|------------|---|------------|------------|------------|
| chr12 | 63084854 | 63305085 | 220232 | 5 | 0 | 4          | 0          | 0.11390336 | 2 | 5          | 0.61140001 | 0.30102999 |
| chr12 | 63305085 | 63352112 | 47028  | 2 | 0 | 4          | 0          | 0.06713722 | 2 | 6          | 0.61140001 | 0.44141547 |
| chr12 | 63352112 | 63691883 | 33972  | 3 | 0 | 4          | 0          | 0.11390336 | 2 | 5          | 0.61140001 | 0.30102999 |
| chr12 | 63691883 | 63850994 | 159112 | 1 | 0 | 4          | 0          | 0.11390336 | 1 | 5          | 0.30102999 | 0.30102999 |
| chr12 | 63850994 | 64055929 | 204936 | 1 | 0 | 3          | 0          | 0.17593012 | 1 | 3          | 0.30102999 | 0.17593012 |
| chr12 | 64055929 | 64264960 | 209032 | 5 | 0 | 3          | 0          | 0.17593012 | 2 | 3          | 0.61140001 | 0.17593012 |
| chr12 | 64264960 | 64352524 | 87565  | 3 | 0 | 3          | 0          | 0.17593012 | 3 | 3          | 0.93173516 | 0.17593012 |
| chr12 | 64352524 | 64413741 | 61218  | 2 | 0 | 3          | 0          | 0.05670724 | 4 | 5          | 1.26272838 | 0.45545077 |
| chr12 | 64413741 | 64501975 | 88235  | 2 | 0 | 3          | 0          | 0.17593012 | 4 | 3          | 1.26272838 | 0.17593012 |
| chr12 | 64501975 | 64502034 | 60     | 1 | 0 | 3          | 0          | 0.05670724 | 4 | 5          | 1.26272838 | 0.45545077 |
| chr12 | 64502034 | 64727103 | 225070 | 6 | 0 | 3          | 0          | 0.05670724 | 3 | 5          | 0.93173516 | 0.45545077 |
| chr12 | 64727103 | 64825682 | 98580  | 3 | 0 | 3          | 0          | 0.05670724 | 4 | 5          | 1.26272838 | 0.45545077 |
| chr12 | 64825682 | 64868025 | 42344  | 2 | 0 | 3          | 0          | 0.05670724 | 3 | 5          | 0.93173516 | 0.45545077 |
| chr12 | 64868025 | 65078660 | 210636 | 6 | 0 | 3          | 0          | 0.05670724 | 4 | 5          | 1.26272838 | 0.45545077 |
| chr12 | 65078660 | 65224807 | 146148 | 3 | 0 | 3          | 0          | 0.05670724 | 3 | 5          | 0.93173516 | 0.45545077 |
| chr12 | 65224807 | 65224866 | 60     | 1 | 0 | 3          | 0          | 0.05670724 | 4 | 5          | 1.26272838 | 0.45545077 |
| chr12 | 65224866 | 65299033 | 74168  | 2 | 0 | 3          | 0          | 0.05670724 | 3 | 5          | 0.93173516 | 0.45545077 |
| chr12 | 65299033 | 65346923 | 47891  | 2 | 0 | 3          | 0          | 0.05670724 | 4 | 5          | 1.26272838 | 0.45545077 |
| chr12 | 65346923 | 65445070 | 98148  | 1 | 0 | 2          | 0          | 0.0429175  | 4 | 4          | 1.26272838 | 0.47744371 |
| chr12 | 65445070 | 65462706 | 17637  | 2 | 0 | 2          | 0          | 0.02162467 | 4 | 5          | 1.26272838 | 0.68214471 |
| chr12 | 65462706 | 65564802 | 102097 | 2 | 0 | 2          | 0          | 0.08289318 | 2 | 4          | 1.26272838 | 0.30102999 |
| chr12 | 65564802 | 65564860 | 59     | 1 | 0 | 3          | 0          | 0.03070643 | 4 | 6          | 1.26272838 | 0.63695542 |
| chr12 | 65564860 | 65632426 | 67567  | 2 | 0 | 3          | 0          | 0.03070643 | 3 | 6          | 0.93173516 | 0.63695542 |
| chr12 | 65632426 | 65632485 | 60     | 1 | 0 | 3          | 0          | 0.03070643 | 4 | 6          | 1.26272838 | 0.63695542 |
| chr12 | 65632485 | 65722290 | 89806  | 2 | 0 | 3          | 0          | 0.03070643 | 3 | 6          | 0.93173516 | 0.63695542 |
| chr12 | 65722290 | 65722349 | 60     | 1 | 0 | 3          | 0          | 0.03070643 | 4 | 6          | 1.26272838 | 0.63695542 |
| chr12 | 65722349 | 65762753 | 40405  | 1 | 0 | 3          | 0          | 0.03070643 | 3 | 6          | 0.93173516 | 0.63695542 |
| chr12 | 65762753 | 65762810 | 58     | 1 | 0 | 5          | 0          | 0.12309572 | 3 | 6          | 0.93173516 | 0.30102999 |
| chr12 | 65762810 | 65822792 | 59883  | 1 | 0 | 4          | 0          | 0.06713722 | 3 | 6          | 0.93173516 | 0.44141547 |
| chr12 | 65822792 | 65857603 | 34812  | 2 | 0 | 4          | 0          | 0.06713722 | 4 | 6          | 1.26272838 | 0.44141547 |
| chr12 | 65857603 | 65857662 | 60     | 1 | 0 | 5          | 0          | 0.12309572 | 4 | 6          | 1.26272838 | 0.30102999 |
| chr12 | 65857662 | 65979828 | 122167 | 1 | 0 | 4          | 0          | 0.11390336 | 4 | 5          | 1.26272838 | 0.30102999 |
| chr12 | 65979828 | 66107973 | 128146 | 1 | 0 | 3          | 0          | 0.10122019 | 3 | 4          | 0.93173516 | 0.30102999 |
| chr12 | 66107973 | 66108032 | 60     | 1 | 0 | 3          | 0          | 0.05670724 | 3 | 5          | 0.93173516 | 0.45545077 |
| chr12 | 66108032 | 66167846 | 59815  | 1 | 0 | 3          | 0          | 0.05670724 | 2 | 5          | 0.61140001 | 0.45545077 |
| chr12 | 66167846 | 66224830 | 56985  | 1 | 0 | 3          | 0          | 0.10122019 | 2 | 4          | 0.61140001 | 0.30102999 |
| chr12 | 66224830 | 66303379 | 78550  | 4 | 0 | 3          | 0          | 0.05670724 | 2 | 5          | 0.61140001 | 0.45545077 |
| chr12 | 66303379 | 66303438 | 60     | 1 | 0 | 3          | 0          | 0.05670724 | 3 | 5          | 0.93173516 | 0.45545077 |
| chr12 | 66303438 | 66441645 | 138208 | 2 | 0 | 3          | 0          | 0.10122019 | 3 | 4          | 0.93173516 | 0.30102999 |
| chr12 | 66441645 | 66620546 | 178902 | 6 | 0 | 2          | 0          | 0.0429175  | 2 | 4          | 0.61140001 | 0.47744371 |
| chr12 | 66620546 | 66666780 | 46235  | 2 | 0 | 2          | 0          | 0.02162467 | 2 | 5          | 0.61140001 | 0.68214471 |
| chr12 | 66666780 | 66712469 | 45690  | 1 | 0 | 2          | 0          | 0.0429175  | 2 | 4          | 0.61140001 | 0.47744371 |
| chr12 | 66712469 | 66731839 | 19371  | 2 | 0 | 2          | 0          | 0.0429175  | 3 | 4          | 0.93173516 | 0.47744371 |
| chr12 | 66731839 | 66731898 | 60     | 1 | 0 | 2          | 0          | 0.02162467 | 3 | 5          | 0.93173516 | 0.68214471 |
| chr12 | 66731898 | 66859293 | 127396 | 2 | 0 | 2          | 0          | 0.0429175  | 2 | 4          | 0.61140001 | 0.47744371 |
| chr12 | 66859293 | 67056891 | 197599 | 4 | 0 | 2          | 0          | 0.0429175  | 3 | 4          | 0.93173516 | 0.47744371 |
| chr12 | 67056891 | 67189836 | 132946 | 2 | 0 | 2          | 0          | 0.0429175  | 2 | 4          | 0.61140001 | 0.47744371 |
| chr12 | 67189836 | 67355301 | 165466 | 1 | 0 | 2          | 0          | 0.08289318 | 2 | 3          | 0.61140001 | 0.30102999 |
| chr12 | 67355301 | 67355360 | 60     | 1 | 0 | 2          | 0          | 0.08289318 | 4 | 3          | 1.26272838 | 0.30102999 |
| chr12 | 67355360 | 67445645 | 90286  | 1 | 0 | 2          | 0          | 0.1575501  | 4 | 2          | 1.26272838 | 0.1575501  |
| chr12 | 67445645 | 67604067 | 158423 | 1 | 0 | 2          | 0          | 0.30102999 | 4 | 1          | 1.26272838 | 0.05404976 |
| chr12 | 67604067 | 67689731 | 85665  | 2 | 0 | 1          | 0          | 0.1218695  | 3 | 1          | 0.93173516 | 0.1218695  |
| chr12 | 67689731 | 67708363 | 18633  | 1 | 0 | 0          | 0          | 0          | 3 | 1          | 0.93173516 | 0.30102999 |
| chr12 | 67708363 | 67794618 | 86256  | 1 | 0 | 0          | 0          | 0          | 2 | 1          | 0.61140001 | 0.30102999 |
| chr12 | 67794618 | 67794677 | 60     | 1 | 0 | 1          | 0          | 0.1218695  | 2 | 1          | 0.61140001 | 0.1218695  |
| chr12 | 67794677 | 68042888 | 248212 | 2 | 0 | 0          | 0          | 0          | 2 | 1          | 0.61140001 | 0.30102999 |
| chr12 | 68042888 | 68141857 | 98970  | 3 | 0 | 1          | 0          | 0.1218695  | 2 | 1          | 0.61140001 | 0.1218695  |
| chr12 | 68141857 | 68249792 | 107936 | 2 | 0 | 2          | 0          | 0.08289318 | 3 | 3          | 0.93173516 | 0.30102999 |
| chr12 | 68249792 | 68352496 | 102705 | 2 | 0 | 2          | 0          | 0.0429175  | 3 | 4          | 0.93173516 | 0.47744371 |
| chr12 | 68352496 | 68474277 | 121782 | 2 | 0 | 2          | 0          | 0.0429175  | 2 | 4          | 0.61140001 | 0.47744371 |
| chr12 | 68474277 | 68474336 | 60     | 1 | 0 | 2          | 0          | 0.10533319 | 2 | 6          | 0.61140001 | 0.91219088 |
| chr12 | 68474336 | 68595235 | 120900 | 2 | 0 | 2          | 0          | 0.08289318 | 2 | 3          | 0.61140001 | 0.30102999 |
| chr12 | 68595235 | 68595294 | 60     | 1 | 0 | 2          | 0          | 0.10533319 | 3 | 6          | 0.93173516 | 0.91219088 |
| chr12 | 68595294 | 68646334 | 51041  | 2 | 0 | 2          | 0          | 0.02162467 | 2 | 5          | 0.61140001 | 0.68214471 |
| chr12 | 68646334 | 68696373 | 50040  | 2 | 0 | 2          | 0          | 0.01053319 | 2 | 6          | 0.61140001 | 0.91219088 |
| chr12 | 68696373 | 68756432 | 60     | 1 | 0 | 4          | 0          | 0.03812622 | 2 | 7          | 0.61140001 | 0.60763643 |
| chr12 | 68756432 | 68755533 | 59122  | 3 | 0 | 3          | 0          | 0.15982558 | 2 | 7          | 0.61140001 | 0.84395715 |
| chr12 | 68755533 | 68845306 | 189754 | 3 | 0 | 5          | 0          | 0.04407651 | 3 | 8          | 0.93173516 | 0.58747015 |
| chr12 | 68845306 | 69003943 | 58638  | 1 | 0 | 4          | 0          | 0.03812622 | 3 | 7          | 0.93173516 | 0.60763643 |
| chr12 | 69003943 | 69020274 | 16322  | 3 | 0 | 4          | 0          | 0.03812622 | 4 | 7          | 1.26272838 | 0.60763643 |
| chr12 | 69020274 | 69083309 | 63036  | 3 | 0 | 4          | 0          | 0.03812622 | 3 | 7          | 0.93173516 | 0.60763643 |
| chr12 | 69083309 | 69103785 | 20477  | 2 | 1 | 4          | 0.02438896 | 0.03812622 | 3 | 7          | 0.51676182 | 0.60763643 |
| chr12 | 69103785 | 69128561 | 24777  | 1 | 5 | 4          | 0.01091641 | 0.07511598 | 4 | 7          | 0.76005302 | 0.43181735 |
| chr12 | 69128561 | 69207331 | 78771  | 3 | 1 | 5          | 0.01091641 | 0.12309572 | 4 | 6          | 0.76005302 | 0.30102999 |
| chr12 | 69207331 | 69207390 | 60     | 1 | 5 | 0.01091641 | 0.07511598 | 4          | 7 | 0.76005302 | 0.43181735 |            |
| chr12 | 69207390 | 69354696 | 147307 | 6 | 1 | 4          | 0.01091641 | 0.03812622 | 4 | 7          | 0.76005302 | 0.60763643 |
| chr12 | 69354696 | 69354755 | 60     | 1 | 5 | 0.01091641 | 0.07511598 | 4          | 7 | 0.76005302 | 0.43181735 |            |
| chr12 | 69354755 | 69575603 | 220849 | 2 | 1 | 4          | 0.01091641 | 0.03812622 | 4 | 7          | 0.76005302 | 0.60763643 |
| chr12 | 69575603 | 69636000 | 60398  | 2 | 1 | 4          | 0.02438896 | 0.03812622 | 3 | 7          | 0.51676182 | 0.60763643 |
| chr12 | 69636000 | 69651788 | 15789  | 2 | 1 | 4          | 0.01091641 | 0.03812622 | 4 | 7          | 0.76005302 | 0.60763643 |
| chr12 | 69651788 | 69746091 | 94304  | 4 | 1 | 6          | 0.01091641 | 0.08122616 | 4 | 8          | 0.76005302 | 0.4250187  |
| chr12 | 69746091 | 69777943 | 31853  | 2 | 1 | 6          | 0.01091641 | 0.129913   | 4 | 7          | 0.76005302 | 0.30102999 |
| chr12 | 69777943 | 69827339 | 49397  | 2 | 1 | 6          | 0.01091641 | 0.08122616 | 4 | 8          | 0.76005302 | 0.4250187  |
| chr12 | 69827339 | 69936885 | 109547 | 3 | 1 | 6          | 0.01091641 | 0.04875589 | 4 | 9          | 0.76005302 | 0.5732208  |
| chr12 | 69936885 | 70061935 | 125051 | 3 | 1 | 6          | 0.01091641 | 0.08122616 | 4 | 9          | 0.76005302 | 0.4250187  |
| chr12 | 70061935 | 70092953 | 31019  | 3 | 1 | 6          | 0.01091641 | 0.04875589 | 4 | 9          | 0.76005302 | 0.5732208  |
| chr12 | 70092953 | 70194095 | 101143 | 3 | 1 | 7          | 0.01091641 | 0.08584816 | 4 | 9          | 0.76005302 | 0.42015402 |
| chr12 | 70194095 | 70209125 | 15031  | 1 | 1 | 6          | 0.01091641 | 0.08122616 | 4 | 8          | 0.76005302 | 0.4250187  |
| chr12 | 70209125 | 70209184 | 60     | 1 | 6 | 0.01091641 | 0.04875589 | 4          | 9 | 0.76005302 | 0.5732208  |            |
| chr12 | 70209184 | 70352291 | 143108 | 2 | 1 | 5          | 0.01091641 | 0.12309572 | 4 | 6          | 0.76005302 | 0.30102999 |
| chr12 | 70352291 | 70539442 | 187152 | 2 | 1 | 4          | 0.01091641 | 0.06713722 | 4 | 6          | 0.76005302 | 0.44141547 |
| chr12 | 70539442 | 70539501 | 60     | 1 | 1 | 4          | 0.01091641 | 0.02074938 | 4 | 8          | 0.76005302 | 0.79906872 |
| chr12 | 70539501 | 70713108 | 173608 | 4 | 1 | 4          | 0.01091641 | 0.03812622 | 4 | 7          | 0.76005302 | 0.60763643 |
| chr12 | 70713108 | 70738096 | 24989  | 2 | 1 | 6          | 0.01091641 | 0.129913   | 4 | 7          | 0.76005302 | 0.30102999 |
| chr12 | 707380   |          |        |   |   |            |            |            |   |            |            |            |

|       |          |          |        |   |    |    |            |            |   |   |            |            |
|-------|----------|----------|--------|---|----|----|------------|------------|---|---|------------|------------|
| chr12 | 72093163 | 72249568 | 156406 | 5 | 0  | 3  | 0          | 0.03070643 | 3 | 6 | 0.93173516 | 0.63695542 |
| chr12 | 72249568 | 72425822 | 176255 | 4 | 0  | 2  | 0          | 0.01053319 | 3 | 6 | 0.93173516 | 0.91219088 |
| chr12 | 72425822 | 72542189 | 116368 | 1 | 0  | 2  | 0          | 0.01053319 | 0 | 6 | 0          | 0.91219088 |
| chr12 | 72542189 | 72655275 | 113087 | 2 | 0  | 2  | 0          | 0.00493743 | 0 | 7 | 0          | 1.16581773 |
| chr12 | 72655275 | 72655334 | 60     | 1 | 0  | 2  | 0          | 0.00493743 | 1 | 7 | 0.30102999 | 1.16581773 |
| chr12 | 72655334 | 72680432 | 25099  | 1 | 0  | 2  | 0          | 0.01053319 | 0 | 6 | 0          | 0.91219088 |
| chr12 | 72680432 | 72680491 | 60     | 1 | 0  | 2  | 0          | 0.01053319 | 1 | 6 | 0.30102999 | 0.91219088 |
| chr12 | 72680491 | 72863637 | 183147 | 4 | 0  | 2  | 0          | 0.01053319 | 0 | 6 | 0          | 0.91219088 |
| chr12 | 72863637 | 72932718 | 69082  | 2 | 0  | 2  | 0          | 0.01053319 | 2 | 6 | 0.61140001 | 0.91219088 |
| chr12 | 72932718 | 72956764 | 24047  | 1 | 0  | 2  | 0          | 0.02162467 | 2 | 5 | 0.61140001 | 0.68214471 |
| chr12 | 72956764 | 73085988 | 129225 | 3 | 0  | 2  | 0          | 0.0429175  | 1 | 4 | 0.30102999 | 0.47744371 |
| chr12 | 73085988 | 73086047 | 60     | 1 | 0  | 2  | 0          | 0.02162467 | 1 | 5 | 0.30102999 | 0.68214471 |
| chr12 | 73086047 | 73306593 | 220547 | 2 | 0  | 2  | 0          | 0.0429175  | 0 | 4 | 0          | 0.47744371 |
| chr12 | 73306593 | 73535084 | 228492 | 2 | 0  | 2  | 0          | 0.02162467 | 0 | 5 | 0          | 0.68214471 |
| chr12 | 73535084 | 73535143 | 60     | 1 | 0  | 3  | 0          | 0.05670724 | 0 | 5 | 0          | 0.45545077 |
| chr12 | 73535143 | 73690865 | 155723 | 1 | 0  | 3  | 0          | 0.10122019 | 0 | 4 | 0          | 0.30102999 |
| chr12 | 73690865 | 73816608 | 125744 | 2 | 0  | 4  | 0          | 0.18734596 | 0 | 4 | 0          | 0.18734596 |
| chr12 | 73816608 | 74205449 | 388842 | 3 | 0  | 1  | 0          | 0.02438996 | 0 | 3 | 0          | 0.51676182 |
| chr12 | 74205449 | 74468373 | 262925 | 3 | 0  | 2  | 0          | 0.08289318 | 0 | 3 | 0          | 0.30102999 |
| chr12 | 74468373 | 74468432 | 60     | 1 | 0  | 5  | 0          | 0.19510895 | 0 | 0 | 0          | 0.19510895 |
| chr12 | 74468432 | 74667388 | 198957 | 4 | 0  | 4  | 0          | 0.11390336 | 0 | 5 | 0          | 0.30102999 |
| chr12 | 74667388 | 74722286 | 54899  | 3 | 0  | 3  | 0          | 0.05670724 | 0 | 0 | 0          | 0.45545077 |
| chr12 | 74722286 | 74931444 | 209159 | 2 | 0  | 4  | 0          | 0.11390336 | 0 | 0 | 0          | 0.30102999 |
| chr12 | 74931444 | 74931503 | 60     | 1 | 0  | 7  | 0          | 0.13499366 | 0 | 2 | 0          | 0.30102999 |
| chr12 | 74931503 | 75055899 | 124397 | 1 | 0  | 6  | 0          | 0.129913   | 0 | 7 | 0.61140001 | 0.30102999 |
| chr12 | 75055899 | 75370979 | 315081 | 2 | 0  | 4  | 0          | 0.11390336 | 2 | 5 | 0.61140001 | 0.30102999 |
| chr12 | 75370979 | 75484417 | 113439 | 2 | 0  | 3  | 0          | 0.05670724 | 2 | 5 | 0.61140001 | 0.45545077 |
| chr12 | 75484417 | 75599959 | 115543 | 4 | 0  | 4  | 0          | 0.06713722 | 0 | 5 | 0.61140001 | 0.44141547 |
| chr12 | 75599959 | 75720308 | 120350 | 2 | 0  | 3  | 0          | 0.05670724 | 2 | 5 | 0.61140001 | 0.45545077 |
| chr12 | 75720308 | 75741466 | 21159  | 1 | 0  | 3  | 0          | 0.10122019 | 2 | 4 | 0.61140001 | 0.30102999 |
| chr12 | 75741466 | 75791455 | 49990  | 3 | 0  | 4  | 0          | 0.11390336 | 2 | 5 | 0.61140001 | 0.30102999 |
| chr12 | 75791455 | 75824698 | 33244  | 2 | 1  | 4  | 0.05404976 | 0.11390336 | 2 | 5 | 0.30102999 | 0.30102999 |
| chr12 | 75824698 | 75889408 | 64711  | 1 | 3  | 3  | 0.05404976 | 0.05670724 | 2 | 5 | 0.30102999 | 0.45545077 |
| chr12 | 75889408 | 76040045 | 150638 | 5 | 1  | 4  | 0.05404976 | 0.11390336 | 2 | 5 | 0.30102999 | 0.30102999 |
| chr12 | 76040045 | 76040104 | 60     | 1 | 6  | 6  | 0.05404976 | 0.30102999 | 0 | 5 | 0.30102999 | 0.12309572 |
| chr12 | 76040104 | 76215591 | 175488 | 2 | 1  | 5  | 0.05404976 | 0.19510895 | 2 | 5 | 0.30102999 | 0.19510895 |
| chr12 | 76215591 | 76215650 | 60     | 1 | 6  | 6  | 0.02438996 | 0.20064824 | 3 | 6 | 0.51676182 | 0.20064824 |
| chr12 | 76215650 | 76369578 | 153929 | 2 | 1  | 5  | 0.05404976 | 0.19510895 | 2 | 5 | 0.30102999 | 0.19510895 |
| chr12 | 76369578 | 76421634 | 52057  | 2 | 1  | 5  | 0.02438996 | 0.12309572 | 3 | 6 | 0.51676182 | 0.30102999 |
| chr12 | 76421634 | 76475486 | 53853  | 5 | 1  | 6  | 0.02438996 | 0.20064824 | 3 | 6 | 0.51676182 | 0.20064824 |
| chr12 | 76475486 | 76661792 | 186307 | 1 | 5  | 5  | 0.02438996 | 0.12309572 | 3 | 6 | 0.51676182 | 0.30102999 |
| chr12 | 76661792 | 76784270 | 122479 | 4 | 1  | 6  | 0.05404976 | 0.03070643 | 3 | 6 | 0.30102999 | 0.63695542 |
| chr12 | 76784270 | 76784329 | 60     | 1 | 4  | 4  | 0.05404976 | 0.06713722 | 2 | 6 | 0.30102999 | 0.44141547 |
| chr12 | 76784329 | 76879852 | 95524  | 2 | 3  | 3  | 0.05404976 | 0.10122019 | 2 | 4 | 0.30102999 | 0.30102999 |
| chr12 | 76879852 | 77016246 | 136395 | 4 | 1  | 2  | 0.05404976 | 0.1575501  | 2 | 2 | 0.30102999 | 0.1575501  |
| chr12 | 77016246 | 77144566 | 128321 | 1 | 1  | 2  | 0.05404976 | 0.30102999 | 2 | 1 | 0.30102999 | 0.05404976 |
| chr12 | 77144566 | 77214869 | 70304  | 4 | 1  | 2  | 0.02438996 | 0.30102999 | 3 | 1 | 0.51676182 | 0.05404976 |
| chr12 | 77214869 | 77243182 | 28314  | 1 | 1  | 2  | 0.05404976 | 0.30102999 | 2 | 1 | 0.30102999 | 0.05404976 |
| chr12 | 77243182 | 77326432 | 83251  | 2 | 1  | 2  | 0.05404976 | 0.1575501  | 2 | 2 | 0.30102999 | 0.1575501  |
| chr12 | 77326432 | 77326491 | 60     | 1 | 2  | 2  | 0.02438996 | 0.1575501  | 3 | 2 | 0.51676182 | 0.1575501  |
| chr12 | 77326491 | 77490446 | 163956 | 2 | 1  | 2  | 0.05404976 | 0.1575501  | 2 | 2 | 0.30102999 | 0.1575501  |
| chr12 | 77490446 | 77565007 | 74562  | 2 | 1  | 2  | 0.05404976 | 0.08289318 | 3 | 3 | 0.30102999 | 0.30102999 |
| chr12 | 77565007 | 77769968 | 204962 | 2 | 1  | 3  | 0.05404976 | 0.17593012 | 3 | 3 | 0.30102999 | 0.17593012 |
| chr12 | 77769968 | 77770027 | 60     | 1 | 4  | 4  | 0.05404976 | 0.18734596 | 2 | 4 | 0.30102999 | 0.18734596 |
| chr12 | 77770027 | 77916033 | 146007 | 1 | 0  | 3  | 0          | 0.10122019 | 1 | 4 | 0.61140001 | 0.30102999 |
| chr12 | 77916033 | 77916092 | 60     | 1 | 0  | 4  | 0          | 0.18734596 | 2 | 4 | 0.61140001 | 0.18734596 |
| chr12 | 77916092 | 78088426 | 172335 | 1 | 0  | 1  | 0          | 0.02438996 | 2 | 3 | 0.61140001 | 0.51676182 |
| chr12 | 78088426 | 78216406 | 127981 | 1 | 0  | 2  | 0.05404976 | 0.30102999 | 1 | 2 | 0.30102999 | 0.30102999 |
| chr12 | 78216406 | 78288003 | 71598  | 3 | 0  | 1  | 0          | 0.02438996 | 1 | 3 | 0.30102999 | 0.51676182 |
| chr12 | 78288003 | 78328560 | 40558  | 2 | 0  | 1  | 0          | 0.01091641 | 1 | 4 | 0.30102999 | 0.76005302 |
| chr12 | 78328560 | 78405252 | 76693  | 1 | 0  | 1  | 0          | 0.01091641 | 0 | 4 | 0          | 0.76005302 |
| chr12 | 78405252 | 78405311 | 60     | 1 | 3  | 3  | 0.30102999 | 0.10122019 | 0 | 4 | 0          | 0.30102999 |
| chr12 | 78405311 | 78510270 | 104960 | 2 | 0  | 1  | 0          | 0.01091641 | 0 | 0 | 0          | 0.76005302 |
| chr12 | 78510270 | 78541147 | 30878  | 2 | 0  | 2  | 0          | 0.0429175  | 0 | 4 | 0          | 0.47744371 |
| chr12 | 78541147 | 78567887 | 26741  | 1 | 0  | 1  | 0          | 0          | 0 | 4 | 0          | 0.76005302 |
| chr12 | 78567887 | 78723750 | 155864 | 3 | 0  | 1  | 0.30102999 | 0.01091641 | 0 | 4 | 0          | 0.76005302 |
| chr12 | 78723750 | 78723809 | 60     | 1 | 5  | 5  | 0.1218695  | 0.30102999 | 1 | 1 | 0.11390336 | 0.11390336 |
| chr12 | 78723809 | 78835579 | 111711 | 1 | 0  | 4  | 0          | 0.18734596 | 0 | 4 | 0          | 0.18734596 |
| chr12 | 78835579 | 78835638 | 60     | 1 | 0  | 4  | 0          | 0.11390336 | 0 | 5 | 0          | 0.30102999 |
| chr12 | 78835638 | 79033483 | 197846 | 1 | 0  | 3  | 0          | 0.05670724 | 2 | 5 | 0          | 0.45545077 |
| chr12 | 79033483 | 79216614 | 183132 | 2 | 1  | 4  | 0.1218695  | 0.11390336 | 1 | 5 | 0.1218695  | 0.30102999 |
| chr12 | 79216614 | 79216673 | 60     | 1 | 10 | 10 | 0.05404976 | 0.97390707 | 2 | 5 | 0.30102999 | 0.01320236 |
| chr12 | 79216673 | 79268211 | 51539  | 1 | 1  | 10 | 0.1218695  | 0.97390707 | 1 | 5 | 0.1218695  | 0.01320236 |
| chr12 | 79268211 | 79397836 | 129626 | 3 | 1  | 7  | 0.1218695  | 0.43181735 | 1 | 5 | 0.1218695  | 0.07511598 |
| chr12 | 79397836 | 79469509 | 71674  | 1 | 4  | 1  | 0.1218695  | 0.11390336 | 1 | 5 | 0.1218695  | 0.30102999 |
| chr12 | 79469509 | 79469568 | 60     | 1 | 5  | 5  | 0.1218695  | 0.19510895 | 1 | 5 | 0.1218695  | 0.19510895 |
| chr12 | 79469568 | 79543532 | 73965  | 1 | 1  | 3  | 0.1218695  | 0.05670724 | 1 | 5 | 0.1218695  | 0.45545077 |
| chr12 | 79543532 | 79543591 | 60     | 1 | 5  | 5  | 0.1218695  | 0.19510895 | 1 | 5 | 0.1218695  | 0.19510895 |
| chr12 | 79543591 | 79607898 | 64308  | 1 | 1  | 4  | 0.1218695  | 0.11390336 | 1 | 5 | 0.1218695  | 0.30102999 |
| chr12 | 79607898 | 79637135 | 29238  | 2 | 1  | 5  | 0.1218695  | 0.19510895 | 1 | 5 | 0.1218695  | 0.19510895 |
| chr12 | 79637135 | 79689969 | 52835  | 1 | 1  | 5  | 0.1218695  | 0.11390336 | 1 | 5 | 0.1218695  | 0.30102999 |
| chr12 | 79689969 | 79747313 | 57345  | 2 | 1  | 5  | 0.1218695  | 0.19510895 | 1 | 5 | 0.1218695  | 0.19510895 |
| chr12 | 79747313 | 79844406 | 97094  | 3 | 1  | 3  | 0.1218695  | 0.05670724 | 1 | 5 | 0.1218695  | 0.45545077 |
| chr12 | 79844406 | 79844465 | 60     | 1 | 4  | 4  | 0.05404976 | 0.11390336 | 2 | 5 | 0.30102999 | 0.30102999 |
| chr12 | 79844465 | 80168419 | 323955 | 7 | 1  | 3  | 0.05404976 | 0.05670724 | 2 | 5 | 0.30102999 | 0.45545077 |
| chr12 | 80168419 | 80168478 | 60     | 1 | 6  | 6  | 0.02438996 | 0.20064824 | 3 | 6 | 0.51676182 | 0.20064824 |
| chr12 | 80168478 | 80266616 | 98139  | 2 | 1  | 5  | 0.02438996 | 0.12309572 | 3 | 6 | 0.51676182 | 0.30102999 |
| chr12 | 80266616 | 80330043 | 63428  | 3 | 1  | 6  | 0.02438996 | 0.20064824 | 3 | 6 | 0.51676182 | 0.20064824 |
| chr12 | 80330043 | 80410473 | 80431  | 2 | 8  | 8  | 0.02438996 | 0.4250187  | 3 | 6 | 0.51676182 | 0.08122616 |
| chr12 | 80410473 | 80589370 | 17898  | 1 | 0  | 7  | 0          | 0.30102999 | 3 | 6 | 0.93173516 | 0.129913   |
| chr12 | 80589370 | 80660644 | 71275  | 2 | 0  | 7  | 0          | 0.20469099 | 3 | 7 | 0.93173516 | 0.20469099 |
| chr12 | 80660644 | 80756514 | 95871  | 2 | 0  | 6  | 0          | 0.30102999 | 5 | 5 | 0.93173516 | 0.12309572 |
| chr12 | 80756514 | 80761471 | 4958   | 2 | 1  | 7  | 0.02438996 | 0.20469099 | 3 | 7 | 0.51676182 | 0.20469099 |
| chr12 | 80761471 | 81049199 | 287729 | 2 | 0  | 6  | 0          | 0.20064824 | 3 | 6 | 0.93173516 | 0.20064824 |



|       |          |          |        |   |   |   |            |            |   |   |            |            |
|-------|----------|----------|--------|---|---|---|------------|------------|---|---|------------|------------|
| chr12 | 84526547 | 84526606 | 60     | 1 | 1 | 0 | 0.1218695  | 0          | 1 | 1 | 0.1218695  | 0.30102999 |
| chr12 | 84526606 | 84826862 | 300257 | 2 | 1 | 0 | 0.30102999 | 0          | 0 | 1 | 0          | 0.30102999 |
| chr12 | 84826862 | 84826921 | 60     | 1 | 1 | 0 | 0.1218695  | 0          | 1 | 3 | 0.1218695  | 0.93173516 |
| chr12 | 84826921 | 85432055 | 605135 | 5 | 1 | 0 | 0.30102999 | 0          | 0 | 2 | 0          | 0.61140001 |
| chr12 | 85432055 | 85581738 | 149684 | 5 | 1 | 1 | 0.30102999 | 0.2438896  | 0 | 3 | 0          | 0.51676182 |
| chr12 | 85581738 | 85677469 | 95732  | 2 | 1 | 0 | 0.30102999 | 0          | 0 | 2 | 0          | 0.61140001 |
| chr12 | 85677469 | 85803630 | 126162 | 4 | 1 | 1 | 0.30102999 | 0.2438896  | 0 | 3 | 0          | 0.51676182 |
| chr12 | 85803630 | 85949922 | 146293 | 2 | 1 | 2 | 0.30102999 | 0.0828918  | 0 | 3 | 0          | 0.30102999 |
| chr12 | 85949922 | 86058290 | 108369 | 2 | 1 | 1 | 0.1218695  | 0.10122019 | 1 | 4 | 0.1218695  | 0.30102999 |
| chr12 | 86058290 | 86058349 | 60     | 1 | 1 | 6 | 0.1218695  | 0.30102999 | 1 | 5 | 0.1218695  | 0.12309572 |
| chr12 | 86058349 | 86199044 | 140696 | 1 | 1 | 5 | 0.1218695  | 0.19510895 | 1 | 5 | 0.1218695  | 0.19510895 |
| chr12 | 86199044 | 86268135 | 69092  | 3 | 1 | 6 | 0.1218695  | 0.30102999 | 1 | 5 | 0.1218695  | 0.12309572 |
| chr12 | 86268135 | 86422899 | 154765 | 3 | 1 | 8 | 0.1218695  | 0.58747015 | 1 | 5 | 0.1218695  | 0.04407651 |
| chr12 | 86422899 | 86485552 | 62654  | 1 | 1 | 7 | 0.1218695  | 0.43181735 | 1 | 5 | 0.1218695  | 0.07511598 |
| chr12 | 86485552 | 86560507 | 74956  | 1 | 1 | 5 | 0.1218695  | 0.19510895 | 1 | 5 | 0.1218695  | 0.19510895 |
| chr12 | 86560507 | 86578383 | 17877  | 2 | 1 | 6 | 0.1218695  | 0.30102999 | 1 | 5 | 0.1218695  | 0.12309572 |
| chr12 | 86578383 | 86624824 | 46442  | 1 | 1 | 6 | 0.30102999 | 0          | 0 | 5 | 0          | 0.12309572 |
| chr12 | 86624824 | 86624883 | 60     | 1 | 0 | 0 | 0          | 0.20469099 | 0 | 7 | 0          | 0.20469099 |
| chr12 | 86624883 | 86702971 | 78089  | 1 | 0 | 5 | 0          | 0.30102999 | 0 | 4 | 0          | 0.11390336 |
| chr12 | 86702971 | 86829006 | 126036 | 3 | 0 | 5 | 0          | 0.19510895 | 0 | 5 | 0          | 0.19510895 |
| chr12 | 86829006 | 86829065 | 60     | 1 | 0 | 7 | 0          | 0.30102999 | 0 | 6 | 0          | 0.129913   |
| chr12 | 86829065 | 86947643 | 118579 | 2 | 0 | 0 | 0          | 0.20064824 | 0 | 6 | 0          | 0.20064824 |
| chr12 | 86947643 | 87003301 | 55659  | 1 | 0 | 6 | 0          | 0.30102999 | 0 | 6 | 0          | 0.12309572 |
| chr12 | 87003301 | 87116506 | 113206 | 3 | 0 | 7 | 0          | 0.43181735 | 0 | 5 | 0          | 0.07511598 |
| chr12 | 87116506 | 87322531 | 116026 | 3 | 0 | 8 | 0          | 0.58747015 | 0 | 5 | 0          | 0.04407651 |
| chr12 | 87322531 | 87484275 | 251745 | 3 | 0 | 8 | 0          | 0.30102999 | 1 | 7 | 0.30102999 | 0.13499366 |
| chr12 | 87484275 | 87484334 | 60     | 1 | 0 | 9 | 0          | 0.42015402 | 1 | 7 | 0.30102999 | 0.08584816 |
| chr12 | 87484334 | 87681595 | 197262 | 1 | 0 | 8 | 0          | 0.30102999 | 1 | 7 | 0.30102999 | 0.13499366 |
| chr12 | 87681595 | 87681654 | 60     | 1 | 1 | 8 | 0.05404976 | 0.20764654 | 2 | 8 | 0.30102999 | 0.20764654 |
| chr12 | 87681654 | 87855003 | 173350 | 1 | 1 | 7 | 0.1218695  | 0.30102999 | 1 | 6 | 0.1218695  | 0.129913   |
| chr12 | 87855003 | 88001647 | 146645 | 1 | 1 | 7 | 0.1218695  | 0.43181735 | 1 | 5 | 0.1218695  | 0.07511598 |
| chr12 | 88001647 | 88001706 | 60     | 1 | 1 | 7 | 0.05404976 | 0.30102999 | 2 | 6 | 0.30102999 | 0.129913   |
| chr12 | 88001706 | 88420788 | 419083 | 5 | 0 | 4 | 0          | 0.30102999 | 2 | 3 | 0.61140001 | 0.10122019 |
| chr12 | 88420788 | 88496794 | 76007  | 2 | 0 | 2 | 0          | 0.1575501  | 2 | 2 | 0.61140001 | 0.1575501  |
| chr12 | 88496794 | 88663132 | 166339 | 6 | 0 | 2 | 0          | 0.0828918  | 2 | 3 | 0.61140001 | 0.30102999 |
| chr12 | 88663132 | 88663191 | 60     | 1 | 2 | 5 | 0.1575501  | 0.30102999 | 2 | 4 | 0.1575501  | 0.11390336 |
| chr12 | 88663191 | 88826677 | 163487 | 1 | 1 | 5 | 0.05404976 | 0.30102999 | 2 | 4 | 0.30102999 | 0.11390336 |
| chr12 | 88826677 | 88826736 | 60     | 1 | 1 | 6 | 0.05404976 | 0.129913   | 2 | 7 | 0.30102999 | 0.30102999 |
| chr12 | 88826736 | 88970524 | 143789 | 3 | 1 | 4 | 0.05404976 | 0.11390336 | 2 | 5 | 0.30102999 | 0.30102999 |
| chr12 | 88970524 | 89197370 | 226847 | 2 | 1 | 5 | 0.05404976 | 0.19510895 | 2 | 5 | 0.30102999 | 0.19510895 |
| chr12 | 89197370 | 89286029 | 88660  | 2 | 2 | 6 | 0.1575501  | 0.20064824 | 2 | 6 | 0.1575501  | 0.20064824 |
| chr12 | 89286029 | 89462848 | 176820 | 1 | 2 | 5 | 0.1575501  | 0.19510895 | 2 | 5 | 0.1575501  | 0.19510895 |
| chr12 | 89462848 | 89549782 | 86933  | 1 | 0 | 4 | 0          | 0.11390336 | 2 | 5 | 0.61140001 | 0.30102999 |
| chr12 | 89549782 | 89625464 | 75658  | 1 | 2 | 0 | 0.0429175  | 0.20429175 | 2 | 4 | 0.61140001 | 0.47744371 |
| chr12 | 89625464 | 89886138 | 260675 | 6 | 0 | 2 | 0          | 0.0828918  | 2 | 3 | 0.61140001 | 0.30102999 |
| chr12 | 89886138 | 8984994  | 98857  | 3 | 0 | 2 | 0          | 0.1575501  | 2 | 2 | 0.61140001 | 0.1575501  |
| chr12 | 8984994  | 90094455 | 109462 | 4 | 0 | 2 | 0          | 0.0828918  | 2 | 3 | 0.61140001 | 0.30102999 |
| chr12 | 90094455 | 90355608 | 261154 | 2 | 0 | 2 | 0          | 0.61140001 | 2 | 0 | 0.61140001 | 0          |
| chr12 | 90355608 | 90472147 | 116540 | 2 | 0 | 2 | 0          | 0.1575501  | 0 | 2 | 0.61140001 | 0.1575501  |
| chr12 | 90472147 | 90472206 | 60     | 1 | 1 | 5 | 0.05404976 | 0.45545077 | 2 | 3 | 0.30102999 | 0.05670724 |
| chr12 | 90472206 | 90589566 | 117361 | 1 | 1 | 4 | 0.05404976 | 0.30102999 | 2 | 4 | 0.30102999 | 0.10122019 |
| chr12 | 90589566 | 90589625 | 60     | 1 | 1 | 4 | 0.05404976 | 0.18734596 | 2 | 4 | 0.30102999 | 0.18734596 |
| chr12 | 90589625 | 90831133 | 241509 | 1 | 1 | 4 | 0.05404976 | 0.47744371 | 2 | 2 | 0.30102999 | 0.0429175  |
| chr12 | 90831133 | 90955311 | 124179 | 1 | 1 | 3 | 0.05404976 | 0.51676182 | 1 | 1 | 0.30102999 | 0.02438896 |
| chr12 | 90955311 | 90955370 | 60     | 1 | 1 | 3 | 0.05404976 | 0.30102999 | 2 | 2 | 0.30102999 | 0.0828918  |
| chr12 | 90955370 | 91309485 | 354116 | 2 | 1 | 2 | 0          | 0.1218695  | 1 | 0 | 0.1218695  | 0          |
| chr12 | 91309485 | 91357890 | 48406  | 4 | 1 | 3 | 0.1218695  | 0.51676182 | 1 | 1 | 0.1218695  | 0.02438896 |
| chr12 | 91357890 | 91497939 | 140050 | 3 | 0 | 2 | 0          | 0.30102999 | 1 | 1 | 0.30102999 | 0.05404976 |
| chr12 | 91497939 | 91539685 | 41747  | 2 | 0 | 2 | 0          | 0.1575501  | 2 | 2 | 0.30102999 | 0.1575501  |
| chr12 | 91539685 | 91567862 | 28178  | 3 | 0 | 9 | 0          | 1.74076927 | 2 | 2 | 0.30102999 | 9.54E-04   |
| chr12 | 91567862 | 91643465 | 75604  | 1 | 0 | 5 | 0          | 0.12643191 | 1 | 1 | 0.30102999 | 0.00478973 |
| chr12 | 91643465 | 91930963 | 287499 | 2 | 0 | 5 | 0          | 0.45545077 | 1 | 1 | 0.30102999 | 0.05670724 |
| chr12 | 91930963 | 91931022 | 60     | 1 | 0 | 6 | 0          | 0.63699542 | 3 | 3 | 0.30102999 | 0.03070643 |
| chr12 | 91931022 | 92172083 | 241062 | 1 | 0 | 5 | 0          | 0.45545077 | 1 | 3 | 0.30102999 | 0.05670724 |
| chr12 | 92172083 | 92362113 | 190031 | 1 | 0 | 3 | 0          | 0          | 1 | 2 | 0.30102999 | 0.0828918  |
| chr12 | 92362113 | 92539486 | 177374 | 5 | 1 | 0 | 0          | 0.30102999 | 1 | 3 | 0.30102999 | 0.17593012 |
| chr12 | 92539486 | 92802384 | 262899 | 2 | 0 | 3 | 0          | 0.30102999 | 0 | 3 | 0.30102999 | 0.0828918  |
| chr12 | 92802384 | 92904583 | 102200 | 2 | 0 | 4 | 0          | 0.30102999 | 1 | 3 | 0.30102999 | 0.10122019 |
| chr12 | 92904583 | 92904642 | 60     | 1 | 0 | 4 | 0          | 0.18734596 | 1 | 4 | 0.30102999 | 0.18734596 |
| chr12 | 92904642 | 93056075 | 151434 | 1 | 0 | 4 | 0          | 0.30102999 | 1 | 3 | 0.30102999 | 0.10122019 |
| chr12 | 93056075 | 93148622 | 92548  | 2 | 0 | 4 | 0          | 0.30102999 | 2 | 3 | 0.61140001 | 0.10122019 |
| chr12 | 93148622 | 93258697 | 110076 | 2 | 0 | 3 | 0          | 0.17593012 | 2 | 3 | 0.61140001 | 0.17593012 |
| chr12 | 93258697 | 93292226 | 70530  | 3 | 0 | 4 | 0          | 0.18734596 | 2 | 4 | 0.61140001 | 0.18734596 |
| chr12 | 93292226 | 93414346 | 85121  | 1 | 0 | 4 | 0          | 0.18734596 | 1 | 4 | 0.30102999 | 0.18734596 |
| chr12 | 93414346 | 93414405 | 60     | 1 | 1 | 4 | 0.1218695  | 0.11390336 | 1 | 5 | 0.1218695  | 0.30102999 |
| chr12 | 93414405 | 93501898 | 87494  | 1 | 1 | 3 | 0.1218695  | 0.17593012 | 1 | 3 | 0.1218695  | 0.17593012 |
| chr12 | 93501898 | 93713940 | 212043 | 2 | 0 | 2 | 0          | 0.0828918  | 1 | 3 | 0.30102999 | 0.30102999 |
| chr12 | 93713940 | 93713999 | 60     | 1 | 0 | 4 | 0          | 0.11390336 | 1 | 5 | 0.30102999 | 0.30102999 |
| chr12 | 93713999 | 93774352 | 60354  | 1 | 0 | 3 | 0          | 0.05670724 | 1 | 5 | 0.30102999 | 0.45545077 |
| chr12 | 93774352 | 93834568 | 60217  | 7 | 1 | 3 | 0.05404976 | 0.05670724 | 2 | 5 | 0.30102999 | 0.45545077 |
| chr12 | 93834568 | 93969808 | 135241 | 2 | 1 | 2 | 0.05404976 | 0.0429175  | 2 | 4 | 0.30102999 | 0.47744371 |
| chr12 | 93969808 | 94039627 | 69820  | 2 | 1 | 2 | 0.05404976 | 0.02162467 | 1 | 5 | 0.30102999 | 0.68214471 |
| chr12 | 94039627 | 94039686 | 60     | 1 | 1 | 4 | 0.05404976 | 0.03812622 | 2 | 7 | 0.30102999 | 0.60763643 |
| chr12 | 94039686 | 94168984 | 129299 | 3 | 0 | 2 | 0          | 0.02162467 | 1 | 5 | 0.30102999 | 0.68214471 |
| chr12 | 94168984 | 94208272 | 39289  | 2 | 1 | 2 | 0.1218695  | 0.01053319 | 1 | 6 | 0.1218695  | 0.91219088 |
| chr12 | 94208272 | 94244445 | 36174  | 1 | 1 | 2 | 0.1218695  | 0.02162467 | 1 | 5 | 0.1218695  | 0.68214471 |
| chr12 | 94244445 | 94244504 | 60     | 1 | 1 | 2 | 0.05404976 | 0.02162467 | 2 | 5 | 0.30102999 | 0.68214471 |
| chr12 | 94244504 | 94338712 | 94209  | 1 | 0 | 2 | 0          | 0.02162467 | 1 | 5 | 0.30102999 | 0.68214471 |
| chr12 | 94338712 | 94805572 | 466861 | 9 | 0 | 2 | 0          | 0.01053319 | 1 | 6 | 0.30102999 | 0.91219088 |
| chr12 | 94805572 | 94805631 | 60     | 1 | 1 | 2 | 0.1218695  | 0.01053319 | 1 | 5 | 0.1218695  | 0.91219088 |
| chr12 | 94805631 | 94867692 | 62062  | 2 | 1 | 5 | 0.1218695  | 0.02162467 | 1 | 6 | 0.1218695  | 0.68214471 |
| chr12 | 94867692 | 94905839 | 38148  | 2 | 2 | 2 | 0.30102999 | 0.02162467 | 1 | 5 | 0.05404976 | 0.68214471 |
| chr12 | 94905839 | 94905898 | 60     | 1 | 1 | 2 | 0.30102999 | 0.01053319 | 1 | 6 | 0.05404976 | 0.91219088 |
| chr12 | 94905898 | 94965271 | 59374  | 1 | 1 | 2 | 0.1218695  | 0.01053319 | 1 | 6 | 0.1218695  | 0.9121908  |

|       |           |           |        |   |   |   |            |            |   |   |            |            |
|-------|-----------|-----------|--------|---|---|---|------------|------------|---|---|------------|------------|
| chr12 | 96991688  | 97081351  | 89664  | 2 | 0 | 6 | 0          | 0.20064824 | 1 | 6 | 0.30102999 | 0.20064824 |
| chr12 | 97081351  | 97081410  | 60     | 1 | 1 | 7 | 0.1218695  | 0.30102999 | 1 | 6 | 0.1218695  | 0.129913   |
| chr12 | 97081410  | 97153073  | 71664  | 1 | 1 | 6 | 0.1218695  | 0.30102999 | 1 | 5 | 0.1218695  | 0.12309572 |
| chr12 | 97153073  | 97239691  | 86619  | 2 | 1 | 6 | 0.1218695  | 0.20064824 | 1 | 6 | 0.1218695  | 0.20064824 |
| chr12 | 97239691  | 97239750  | 60     | 1 | 1 | 6 | 0.05404976 | 0.20064824 | 2 | 6 | 0.30102999 | 0.20064824 |
| chr12 | 97239750  | 97345858  | 106109 | 3 | 1 | 6 | 0.1218695  | 0.30102999 | 1 | 5 | 0.1218695  | 0.12309572 |
| chr12 | 97345858  | 97374327  | 28470  | 1 | 1 | 6 | 0.1218695  | 0.19510895 | 1 | 5 | 0.1218695  | 0.19510895 |
| chr12 | 97374327  | 97374386  | 60     | 1 | 1 | 5 | 0.05404976 | 0.19510895 | 2 | 5 | 0.30102999 | 0.19510895 |
| chr12 | 97374386  | 97605071  | 230686 | 2 | 0 | 4 | 0          | 0.30102999 | 2 | 3 | 0.61140001 | 0.10122019 |
| chr12 | 97605071  | 97605130  | 60     | 1 | 0 | 5 | 0          | 0.30102999 | 2 | 4 | 0.61140001 | 0.11390336 |
| chr12 | 97605130  | 97837042  | 231913 | 1 | 0 | 3 | 0          | 0.10122019 | 1 | 4 | 0.30102999 | 0.30102999 |
| chr12 | 97837042  | 97877626  | 40585  | 1 | 0 | 2 | 0          | 0.08289318 | 1 | 3 | 0.30102999 | 0.30102999 |
| chr12 | 97877626  | 97877685  | 60     | 1 | 1 | 2 | 0.05404976 | 0.08289318 | 1 | 3 | 0.30102999 | 0.30102999 |
| chr12 | 97877685  | 97909997  | 32313  | 1 | 0 | 2 | 0          | 0.08289318 | 1 | 3 | 0.30102999 | 0.30102999 |
| chr12 | 97909997  | 97910056  | 60     | 1 | 0 | 3 | 0          | 0.17593012 | 1 | 3 | 0.30102999 | 0.17593012 |
| chr12 | 97910056  | 97937939  | 27884  | 1 | 0 | 2 | 0          | 0.1575501  | 1 | 2 | 0.30102999 | 0.1575501  |
| chr12 | 97937939  | 98094511  | 156573 | 4 | 0 | 2 | 0          | 0.08289318 | 1 | 3 | 0.30102999 | 0.30102999 |
| chr12 | 98094511  | 98094570  | 60     | 1 | 0 | 2 | 0          | 0.02162467 | 1 | 5 | 0.30102999 | 0.68214471 |
| chr12 | 98094570  | 98196266  | 101697 | 2 | 0 | 2 | 0          | 0.0429175  | 1 | 4 | 0.30102999 | 0.47744371 |
| chr12 | 98196266  | 98286993  | 100728 | 2 | 0 | 2 | 0          | 0.0429175  | 2 | 4 | 0.61140001 | 0.47744371 |
| chr12 | 98286993  | 98287052  | 60     | 1 | 0 | 3 | 0          | 0.10122019 | 1 | 4 | 0.61140001 | 0.30102999 |
| chr12 | 98287052  | 98910948  | 613897 | 5 | 0 | 2 | 0          | 0.1575501  | 1 | 2 | 0.61140001 | 0.1575501  |
| chr12 | 98910948  | 99074125  | 163178 | 5 | 0 | 2 | 0          | 0.1575501  | 1 | 2 | 0.30102999 | 0.1575501  |
| chr12 | 99074125  | 99102363  | 28239  | 2 | 0 | 3 | 0          | 0.17593012 | 1 | 3 | 0.30102999 | 0.17593012 |
| chr12 | 99102363  | 99166844  | 64482  | 3 | 0 | 4 | 0          | 0.11390336 | 1 | 5 | 0.30102999 | 0.30102999 |
| chr12 | 99166844  | 99232726  | 65883  | 2 | 0 | 5 | 0          | 0.12309572 | 1 | 6 | 0.30102999 | 0.30102999 |
| chr12 | 99232726  | 99275559  | 42834  | 2 | 0 | 6 | 0          | 0.20064824 | 1 | 6 | 0.30102999 | 0.20064824 |
| chr12 | 99275559  | 99384956  | 109398 | 2 | 0 | 6 | 0          | 0.30102999 | 2 | 1 | 0.30102999 | 0.12309572 |
| chr12 | 99384956  | 99519258  | 134303 | 2 | 0 | 5 | 0          | 0.19510895 | 1 | 5 | 0.30102999 | 0.19510895 |
| chr12 | 99519258  | 99519316  | 59     | 1 | 0 | 6 | 0          | 0.30102999 | 1 | 5 | 0.30102999 | 0.12309572 |
| chr12 | 99519316  | 99574445  | 55130  | 1 | 0 | 5 | 0          | 0.19510895 | 1 | 5 | 0.30102999 | 0.19510895 |
| chr12 | 99574445  | 99574504  | 60     | 1 | 0 | 5 | 0          | 0.12309572 | 1 | 6 | 0.30102999 | 0.30102999 |
| chr12 | 99574504  | 99701065  | 126562 | 2 | 0 | 5 | 0          | 0.19510895 | 1 | 5 | 0.30102999 | 0.19510895 |
| chr12 | 99701065  | 99749458  | 48394  | 2 | 0 | 6 | 0          | 0.20064824 | 1 | 6 | 0.30102999 | 0.20064824 |
| chr12 | 99749458  | 99844789  | 95332  | 2 | 0 | 6 | 0          | 0.30102999 | 1 | 5 | 0.30102999 | 0.12309572 |
| chr12 | 99844789  | 99917893  | 73105  | 2 | 0 | 6 | 0          | 0.20064824 | 1 | 5 | 0.30102999 | 0.20064824 |
| chr12 | 99917893  | 100043181 | 125289 | 4 | 0 | 7 | 0          | 0.20469099 | 1 | 7 | 0.30102999 | 0.20469099 |
| chr12 | 100043181 | 100082900 | 39720  | 1 | 0 | 6 | 0          | 0.30102999 | 1 | 5 | 0.30102999 | 0.12309572 |
| chr12 | 100082900 | 100230230 | 147331 | 3 | 0 | 5 | 0          | 0.19510895 | 1 | 5 | 0.30102999 | 0.19510895 |
| chr12 | 100230230 | 100355505 | 125276 | 3 | 0 | 5 | 0          | 0.12309572 | 1 | 6 | 0.30102999 | 0.30102999 |
| chr12 | 100355505 | 100424372 | 68868  | 2 | 0 | 5 | 0          | 0.04407651 | 1 | 8 | 0.30102999 | 0.58747015 |
| chr12 | 100424372 | 100481580 | 57209  | 1 | 0 | 4 | 0          | 0.02074938 | 1 | 8 | 0.30102999 | 0.79906872 |
| chr12 | 100481580 | 100481639 | 60     | 1 | 0 | 6 | 0          | 0.08122616 | 1 | 8 | 0.30102999 | 0.4250187  |
| chr12 | 100481639 | 100606277 | 124639 | 4 | 0 | 6 | 0          | 0.129913   | 1 | 7 | 0.30102999 | 0.30102999 |
| chr12 | 100606277 | 100646153 | 39877  | 1 | 0 | 6 | 0          | 0.20064824 | 1 | 6 | 0.30102999 | 0.20064824 |
| chr12 | 100646153 | 100686287 | 40135  | 1 | 0 | 6 | 0          | 0.30102999 | 1 | 5 | 0.30102999 | 0.12309572 |
| chr12 | 100686287 | 100728308 | 42022  | 2 | 0 | 6 | 0          | 0.20064824 | 1 | 6 | 0.30102999 | 0.20064824 |
| chr12 | 100728308 | 100728367 | 60     | 1 | 0 | 7 | 0          | 0.20469099 | 1 | 7 | 0.30102999 | 0.20469099 |
| chr12 | 100728367 | 100774458 | 46092  | 2 | 0 | 6 | 0          | 0.20064824 | 1 | 6 | 0.30102999 | 0.20064824 |
| chr12 | 100774458 | 100774516 | 59     | 1 | 0 | 7 | 0          | 0.20469099 | 1 | 7 | 0.30102999 | 0.20469099 |
| chr12 | 100774516 | 100813920 | 39405  | 1 | 0 | 6 | 0          | 0.129913   | 1 | 7 | 0.30102999 | 0.30102999 |
| chr12 | 100813920 | 100813979 | 60     | 1 | 0 | 6 | 0          | 0.08122616 | 1 | 8 | 0.30102999 | 0.4250187  |
| chr12 | 100813979 | 100867757 | 53779  | 1 | 0 | 6 | 0          | 0.20064824 | 1 | 6 | 0.30102999 | 0.20064824 |
| chr12 | 100867757 | 101017584 | 149828 | 7 | 0 | 6 | 0          | 0.30102999 | 1 | 5 | 0.30102999 | 0.12309572 |
| chr12 | 101017584 | 101184121 | 166538 | 1 | 0 | 5 | 0          | 0.30102999 | 1 | 4 | 0.30102999 | 0.11390336 |
| chr12 | 101184121 | 101248965 | 64845  | 1 | 0 | 4 | 0          | 0.18734596 | 1 | 4 | 0.30102999 | 0.18734596 |
| chr12 | 101248965 | 101295422 | 46458  | 2 | 1 | 6 | 0.1218695  | 0.44141547 | 1 | 4 | 0.1218695  | 0.06713722 |
| chr12 | 101295422 | 101336232 | 40811  | 2 | 1 | 6 | 0.1218695  | 0.30102999 | 1 | 5 | 0.1218695  | 0.12309572 |
| chr12 | 101336232 | 101412460 | 76229  | 2 | 1 | 7 | 0.1218695  | 0.43181735 | 1 | 5 | 0.1218695  | 0.07511598 |
| chr12 | 101412460 | 101441803 | 29344  | 1 | 1 | 5 | 0.1218695  | 0.19510895 | 1 | 5 | 0.1218695  | 0.19510895 |
| chr12 | 101441803 | 101491653 | 49851  | 2 | 1 | 4 | 0.1218695  | 0.11390336 | 1 | 5 | 0.1218695  | 0.30102999 |
| chr12 | 101491653 | 101522134 | 30482  | 2 | 1 | 4 | 0.1218695  | 0.06713722 | 1 | 6 | 0.1218695  | 0.44141547 |
| chr12 | 101522134 | 101566971 | 44838  | 1 | 1 | 4 | 0.1218695  | 0.11390336 | 1 | 5 | 0.1218695  | 0.30102999 |
| chr12 | 101566971 | 101648748 | 81778  | 1 | 0 | 4 | 0          | 0.11390336 | 1 | 5 | 0.30102999 | 0.30102999 |
| chr12 | 101648748 | 101679596 | 30849  | 2 | 0 | 5 | 0          | 0.19510895 | 2 | 5 | 0.61140001 | 0.19510895 |
| chr12 | 101679596 | 101764242 | 84647  | 3 | 1 | 5 | 0          | 0.19510895 | 1 | 5 | 0.30102999 | 0.19510895 |
| chr12 | 101764242 | 101794956 | 30715  | 1 | 0 | 4 | 0          | 0.11390336 | 1 | 5 | 0.30102999 | 0.30102999 |
| chr12 | 101794956 | 101870585 | 75630  | 1 | 0 | 3 | 0          | 0.05670724 | 1 | 5 | 0.30102999 | 0.45545077 |
| chr12 | 101870585 | 101873197 | 2613   | 2 | 0 | 4 | 0          | 0.11390336 | 2 | 5 | 0.61140001 | 0.30102999 |
| chr12 | 101873197 | 101873256 | 60     | 1 | 0 | 5 | 0          | 0.19510895 | 1 | 2 | 0.61140001 | 0.19510895 |
| chr12 | 101873256 | 101994066 | 120811 | 1 | 0 | 4 | 0          | 0.11390336 | 1 | 5 | 0.30102999 | 0.30102999 |
| chr12 | 101994066 | 102039168 | 45103  | 1 | 0 | 4 | 0          | 0.11390336 | 1 | 5 | 0.30102999 | 0.30102999 |
| chr12 | 102039168 | 102124251 | 85084  | 7 | 1 | 4 | 0.1218695  | 0.11390336 | 1 | 5 | 0.1218695  | 0.30102999 |
| chr12 | 102124251 | 102189689 | 65439  | 2 | 0 | 4 | 0          | 0.11390336 | 1 | 5 | 0.30102999 | 0.30102999 |
| chr12 | 102189689 | 102223339 | 33651  | 2 | 1 | 4 | 0.1218695  | 0.06713722 | 1 | 6 | 0.1218695  | 0.44141547 |
| chr12 | 102223339 | 102292621 | 69283  | 1 | 0 | 4 | 0          | 0.06713722 | 1 | 6 | 0.30102999 | 0.44141547 |
| chr12 | 102292621 | 102295162 | 2542   | 2 | 0 | 6 | 0          | 0.20064824 | 1 | 6 | 0.30102999 | 0.20064824 |
| chr12 | 102295162 | 102377007 | 81846  | 2 | 0 | 5 | 0          | 0.12309572 | 1 | 6 | 0.30102999 | 0.30102999 |
| chr12 | 102377007 | 102449725 | 72719  | 2 | 0 | 4 | 0          | 0.06713722 | 1 | 6 | 0.30102999 | 0.44141547 |
| chr12 | 102449725 | 102512359 | 62635  | 3 | 0 | 5 | 0          | 0.12309572 | 1 | 6 | 0.30102999 | 0.30102999 |
| chr12 | 102512359 | 102569246 | 56888  | 2 | 0 | 4 | 0          | 0.06713722 | 1 | 6 | 0.30102999 | 0.44141547 |
| chr12 | 102569246 | 102569305 | 60     | 1 | 0 | 5 | 0          | 0.12309572 | 1 | 6 | 0.30102999 | 0.30102999 |
| chr12 | 102569305 | 102591550 | 22246  | 2 | 0 | 5 | 0          | 0.19510895 | 2 | 1 | 0.30102999 | 0.19510895 |
| chr12 | 102591550 | 102591609 | 60     | 1 | 0 | 5 | 0          | 0.12309572 | 1 | 6 | 0.30102999 | 0.30102999 |
| chr12 | 102591609 | 102792245 | 200637 | 2 | 0 | 3 | 0          | 0.05670724 | 1 | 5 | 0.30102999 | 0.45545077 |
| chr12 | 102792245 | 102872434 | 80190  | 7 | 0 | 3 | 0          | 0.03070643 | 2 | 6 | 0.61140001 | 0.63695542 |
| chr12 | 102872434 | 103012629 | 140196 | 2 | 1 | 0 | 0          | 0.03070643 | 0 | 6 | 0.30102999 | 0.63695542 |
| chr12 | 103012629 | 103012688 | 60     | 1 | 0 | 5 | 0          | 0.12309572 | 1 | 6 | 0.30102999 | 0.30102999 |
| chr12 | 103012688 | 103138394 | 125707 | 1 | 0 | 6 | 0          | 0.12309572 | 1 | 6 | 0.30102999 | 0.30102999 |
| chr12 | 103138394 | 103353153 | 214760 | 6 | 0 | 5 | 0          | 0.07511598 | 0 | 7 | 0          | 0.43181735 |
| chr12 | 103353153 | 103485872 | 132720 | 1 | 0 | 4 | 0          | 0.06713722 | 1 | 6 | 0          | 0.44141547 |
| chr12 | 103485872 | 103557886 | 72015  | 2 | 0 | 4 | 0          | 0.06713722 | 1 | 6 | 0.30102999 | 0.44141547 |
| chr12 | 103557886 | 103557945 | 60     | 1 | 0 | 6 | 0          | 0.129913   | 1 | 7 | 0.30102999 | 0.30102999 |
| chr12 | 103557945 | 103866426 | 308482 | 4 | 0 | 4 | 0          | 0.03812622 |   |   |            |            |

|       |           |           |        |    |   |            |            |            |   |    |            |            |
|-------|-----------|-----------|--------|----|---|------------|------------|------------|---|----|------------|------------|
| chr12 | 106903658 | 106959118 | 55461  | 1  | 0 | 7          | 0          | 0.13499366 | 1 | 8  | 0.30102999 | 0.30102999 |
| chr12 | 106959118 | 106959177 | 60     | 1  | 1 | 7          | 0.1218695  | 0.13499366 | 1 | 8  | 0.1218695  | 0.30102999 |
| chr12 | 106959177 | 107002609 | 43433  | 1  | 0 | 7          | 0          | 0.13499366 | 1 | 8  | 0.30102999 | 0.30102999 |
| chr12 | 107002609 | 107048772 | 46164  | 2  | 0 | 7          | 0          | 0.08584816 | 1 | 9  | 0.30102999 | 0.42015402 |
| chr12 | 107048772 | 107156389 | 107618 | 3  | 0 | 6          | 0          | 0.04875589 | 1 | 9  | 0.30102999 | 0.5732208  |
| chr12 | 107156389 | 107208633 | 52245  | 3  | 0 | 7          | 0          | 0.08584816 | 1 | 9  | 0.30102999 | 0.42015402 |
| chr12 | 107208633 | 107351649 | 143017 | 5  | 0 | 9          | 0          | 0.20975986 | 1 | 9  | 0.30102999 | 0.20975986 |
| chr12 | 107351649 | 107523902 | 172254 | 6  | 0 | 7          | 0          | 0.08584816 | 1 | 9  | 0.30102999 | 0.42015402 |
| chr12 | 107523902 | 107738930 | 215029 | 2  | 0 | 5          | 0          | 0.04407651 | 1 | 8  | 0.30102999 | 0.58747015 |
| chr12 | 107738930 | 107738989 | 60     | 1  | 1 | 6          | 0.1218695  | 0.04875589 | 1 | 9  | 0.1218695  | 0.5732208  |
| chr12 | 107738989 | 107948598 | 209610 | 3  | 1 | 4          | 0.1218695  | 0.02074938 | 1 | 8  | 0.1218695  | 0.79906872 |
| chr12 | 107948598 | 107948657 | 60     | 1  | 1 | 5          | 0.1218695  | 0.04407651 | 1 | 8  | 0.1218695  | 0.58747015 |
| chr12 | 107948657 | 107992941 | 44285  | 1  | 1 | 4          | 0.1218695  | 0.02074938 | 1 | 8  | 0.1218695  | 0.79906872 |
| chr12 | 107992941 | 107993000 | 60     | 1  | 1 | 5          | 0.1218695  | 0.04407651 | 1 | 8  | 0.1218695  | 0.58747015 |
| chr12 | 107993000 | 108082544 | 89545  | 3  | 1 | 4          | 0.1218695  | 0.03812622 | 1 | 7  | 0.1218695  | 0.60763643 |
| chr12 | 108082544 | 108102768 | 20225  | 2  | 1 | 5          | 0.1218695  | 0.04407651 | 1 | 8  | 0.1218695  | 0.58747015 |
| chr12 | 108102768 | 108137005 | 34238  | 1  | 1 | 4          | 0.1218695  | 0.03812622 | 1 | 7  | 0.1218695  | 0.60763643 |
| chr12 | 108137005 | 108181370 | 44366  | 3  | 1 | 4          | 0.1218695  | 0.02074938 | 1 | 8  | 0.1218695  | 0.79906872 |
| chr12 | 108181370 | 108181429 | 60     | 1  | 1 | 4          | 0.1218695  | 0.01077081 | 1 | 9  | 0.1218695  | 1.01542894 |
| chr12 | 108181429 | 108375431 | 194003 | 1  | 0 | 4          | 0          | 0.02074938 | 1 | 8  | 0.30102999 | 0.79906872 |
| chr12 | 108375431 | 108545583 | 170153 | 1  | 0 | 4          | 0          | 0.06713723 | 1 | 6  | 0.30102999 | 0.44141547 |
| chr12 | 108545583 | 108545642 | 60     | 1  | 0 | 4          | 0          | 0.03812622 | 1 | 7  | 0.30102999 | 0.60763643 |
| chr12 | 108545642 | 108611031 | 65390  | 1  | 0 | 4          | 0          | 0.03812622 | 1 | 7  | 0          | 0.60763643 |
| chr12 | 108611031 | 108641156 | 30126  | 2  | 0 | 4          | 0          | 0.02074938 | 1 | 8  | 0          | 0.79906872 |
| chr12 | 108641156 | 108641215 | 60     | 1  | 0 | 4          | 0          | 0.00530919 | 1 | 10 | 0          | 1.2568129  |
| chr12 | 108641215 | 108687293 | 46079  | 1  | 0 | 4          | 0          | 0.01077081 | 1 | 9  | 0          | 1.01542894 |
| chr12 | 108687293 | 108729628 | 42336  | 1  | 0 | 4          | 0          | 0.02074938 | 1 | 8  | 0          | 0.79906872 |
| chr12 | 108729628 | 108910156 | 180529 | 3  | 0 | 4          | 0          | 0.01077081 | 1 | 9  | 0          | 1.01542894 |
| chr12 | 108910156 | 108931293 | 21138  | 1  | 5 | 0.30102999 | 0.01320236 | 0.01077081 | 1 | 10 | 0          | 0.97390707 |
| chr12 | 108931293 | 108988359 | 57067  | 3  | 1 | 4          | 0.30102999 | 0.01077081 | 1 | 9  | 0          | 1.01542894 |
| chr12 | 108988359 | 108988418 | 60     | 1  | 1 | 4          | 0.30102999 | 0.00247414 | 1 | 11 | 0          | 1.52371709 |
| chr12 | 108988418 | 109019612 | 31195  | 1  | 0 | 4          | 0.30102999 | 0.00530919 | 1 | 10 | 0          | 1.2568129  |
| chr12 | 109019612 | 109039228 | 19617  | 1  | 1 | 4          | 0.30102999 | 0.01077081 | 1 | 9  | 0          | 1.01542894 |
| chr12 | 109039228 | 109063192 | 23965  | 1  | 4 | 0.30102999 | 0.02074938 | 0.02074938 | 1 | 8  | 0          | 0.79906872 |
| chr12 | 109063192 | 109091137 | 27946  | 1  | 1 | 4          | 0.30102999 | 0.03812622 | 1 | 7  | 0          | 0.60763643 |
| chr12 | 109091137 | 109117833 | 26697  | 2  | 1 | 4          | 0.30102999 | 0.02074938 | 1 | 8  | 0          | 0.79906872 |
| chr12 | 109117833 | 109449025 | 331193 | 9  | 1 | 4          | 0.30102999 | 0.00530919 | 1 | 10 | 0          | 1.2568129  |
| chr12 | 109449025 | 109577256 | 128232 | 6  | 1 | 5          | 0.30102999 | 0.00317045 | 1 | 12 | 0          | 1.46403142 |
| chr12 | 109577256 | 109639347 | 62092  | 2  | 1 | 5          | 0.30102999 | 0.00666883 | 1 | 11 | 0          | 1.20557689 |
| chr12 | 109639347 | 109639406 | 60     | 1  | 1 | 5          | 0.30102999 | 0.00317045 | 1 | 12 | 0          | 1.46403142 |
| chr12 | 109639406 | 109673159 | 33754  | 1  | 0 | 5          | 0          | 0.00666883 | 1 | 11 | 0          | 1.20557689 |
| chr12 | 109673159 | 109700182 | 27024  | 1  | 0 | 5          | 0          | 0.01320236 | 1 | 10 | 0          | 0.97390707 |
| chr12 | 109700182 | 109700235 | 54     | 1  | 0 | 5          | 0          | 0.00666883 | 1 | 11 | 0          | 1.20557689 |
| chr12 | 109700235 | 109886191 | 185957 | 4  | 0 | 5          | 0          | 0.01320236 | 1 | 10 | 0          | 0.97390707 |
| chr12 | 109886191 | 109959067 | 72877  | 3  | 0 | 5          | 0          | 0.02473314 | 1 | 9  | 0          | 0.76806864 |
| chr12 | 109959067 | 110008934 | 49868  | 2  | 0 | 6          | 0          | 0.04875589 | 1 | 9  | 0          | 0.5732208  |
| chr12 | 110008934 | 110008993 | 60     | 1  | 0 | 6          | 0          | 0.01518174 | 1 | 11 | 0          | 0.9449689  |
| chr12 | 110008993 | 110315774 | 306782 | 9  | 0 | 6          | 0          | 0.02793176 | 1 | 10 | 0          | 0.74627054 |
| chr12 | 110315774 | 110349515 | 33742  | 1  | 0 | 6          | 0          | 0.04875589 | 1 | 9  | 0          | 0.5732208  |
| chr12 | 110349515 | 110349574 | 60     | 1  | 0 | 7          | 0          | 0.08584816 | 1 | 9  | 0          | 0.42015402 |
| chr12 | 110349574 | 110516707 | 167134 | 6  | 0 | 6          | 0          | 0.04875589 | 1 | 9  | 0          | 0.5732208  |
| chr12 | 110516707 | 110584768 | 68062  | 2  | 0 | 6          | 0          | 0.08122616 | 1 | 8  | 0          | 0.4250187  |
| chr12 | 110584768 | 110720390 | 135623 | 4  | 0 | 6          | 0          | 0.04875589 | 1 | 9  | 0          | 0.5732208  |
| chr12 | 110720390 | 110720449 | 60     | 1  | 0 | 6          | 0          | 0.02793176 | 1 | 10 | 0          | 0.74627054 |
| chr12 | 110720449 | 110788279 | 67831  | 3  | 0 | 5          | 0          | 0.02473314 | 1 | 9  | 0          | 0.76806864 |
| chr12 | 110788279 | 110825442 | 37164  | 1  | 0 | 5          | 0          | 0.04407651 | 1 | 8  | 0          | 0.58747015 |
| chr12 | 110825442 | 11082590  | 57149  | 2  | 0 | 5          | 0          | 0.02473314 | 1 | 9  | 0          | 0.76806864 |
| chr12 | 11082590  | 110906118 | 23529  | 2  | 0 | 5          | 0          | 0.01320236 | 1 | 10 | 0          | 0.97390707 |
| chr12 | 110906118 | 110922927 | 16810  | 1  | 0 | 4          | 0          | 0.01077081 | 1 | 9  | 0          | 1.01542894 |
| chr12 | 110922927 | 110933787 | 10861  | 2  | 0 | 5          | 0          | 0.02473314 | 1 | 9  | 0          | 0.76806864 |
| chr12 | 110933787 | 110952877 | 19091  | 3  | 0 | 6          | 0          | 0.02793176 | 1 | 10 | 0          | 0.74627054 |
| chr12 | 110952877 | 110969787 | 16911  | 2  | 0 | 7          | 0          | 0.05232577 | 1 | 10 | 0          | 0.56314362 |
| chr12 | 110969787 | 111019428 | 49642  | 0  | 7 | 0          | 0          | 0.08584816 | 1 | 9  | 0          | 0.42015402 |
| chr12 | 111019428 | 111162580 | 143153 | 5  | 0 | 7          | 0          | 0.05232577 | 1 | 10 | 0          | 0.56314362 |
| chr12 | 111162580 | 111291334 | 128755 | 1  | 0 | 7          | 0          | 0.13499366 | 1 | 8  | 0          | 0.30102999 |
| chr12 | 111291334 | 111291388 | 55     | 1  | 0 | 7          | 0          | 0.05232577 | 1 | 10 | 0          | 0.56314362 |
| chr12 | 111291388 | 111410307 | 118920 | 4  | 0 | 7          | 0          | 0.13499366 | 1 | 8  | 0          | 0.30102999 |
| chr12 | 111410307 | 111531709 | 121403 | 0  | 7 | 0          | 0          | 0.08584816 | 1 | 9  | 0          | 0.42015402 |
| chr12 | 111531709 | 111531768 | 60     | 1  | 0 | 7          | 0          | 0.05232577 | 1 | 10 | 0          | 0.56314362 |
| chr12 | 111531768 | 111651602 | 119825 | 2  | 0 | 6          | 0          | 0.02793176 | 1 | 10 | 0          | 0.74627054 |
| chr12 | 111651602 | 111724247 | 72646  | 2  | 0 | 7          | 0          | 0.05232577 | 1 | 10 | 0          | 0.56314362 |
| chr12 | 111724247 | 111890077 | 165831 | 4  | 0 | 6          | 0          | 0.02793176 | 1 | 10 | 0          | 0.74627054 |
| chr12 | 111890077 | 111926444 | 36368  | 3  | 0 | 7          | 0          | 0.05232577 | 1 | 10 | 0          | 0.56314362 |
| chr12 | 111926444 | 111956233 | 29790  | 2  | 0 | 7          | 0          | 0.03037338 | 1 | 11 | 0          | 0.73110763 |
| chr12 | 111956233 | 112061298 | 105066 | 3  | 0 | 6          | 0          | 0.02793176 | 1 | 10 | 0          | 0.74627054 |
| chr12 | 112061298 | 112087791 | 26494  | 1  | 0 | 6          | 0          | 0.04875589 | 1 | 9  | 0          | 0.5732208  |
| chr12 | 112087791 | 112159670 | 71880  | 1  | 0 | 6          | 0          | 0.08122616 | 1 | 8  | 0          | 0.4250187  |
| chr12 | 112159670 | 112184121 | 24452  | 2  | 0 | 6          | 0          | 0.04875589 | 1 | 9  | 0          | 0.5732208  |
| chr12 | 112184121 | 112326796 | 142676 | 9  | 0 | 6          | 0          | 0.02793176 | 1 | 10 | 0          | 0.74627054 |
| chr12 | 112326796 | 112369235 | 42440  | 1  | 0 | 5          | 0          | 0.02473314 | 1 | 9  | 0          | 0.76806864 |
| chr12 | 112369235 | 112498109 | 128875 | 6  | 0 | 6          | 0          | 0.04875589 | 1 | 9  | 0          | 0.5732208  |
| chr12 | 112498109 | 112536499 | 38391  | 2  | 0 | 6          | 0          | 0.02793176 | 1 | 10 | 0          | 0.74627054 |
| chr12 | 112536499 | 112642469 | 105971 | 3  | 0 | 6          | 0          | 0.01518174 | 1 | 11 | 0          | 0.9449689  |
| chr12 | 112642469 | 112687575 | 45107  | 2  | 0 | 7          | 0          | 0.01667721 | 1 | 12 | 0          | 0.92532268 |
| chr12 | 112687575 | 112780616 | 93042  | 2  | 0 | 7          | 0          | 0.03037338 | 1 | 11 | 0          | 0.73110763 |
| chr12 | 112780616 | 112890812 | 110197 | 2  | 0 | 6          | 0          | 0.01518174 | 1 | 11 | 0          | 0.9449689  |
| chr12 | 112890812 | 112934567 | 43756  | 2  | 0 | 5          | 0          | 0.00666883 | 1 | 11 | 0          | 1.20557689 |
| chr12 | 112934567 | 112934626 | 60     | 1  | 1 | 5          | 0.30102999 | 0.00666883 | 1 | 11 | 0          | 1.20557689 |
| chr12 | 112934626 | 113084877 | 150252 | 1  | 0 | 5          | 0          | 0.00666883 | 1 | 11 | 0          | 1.20557689 |
| chr12 | 113084877 | 113134598 | 49722  | 2  | 0 | 7          | 0          | 0.03037338 | 1 | 11 | 0          | 0.73110763 |
| chr12 | 113134598 | 113254660 | 120063 | 2  | 0 | 6          | 0          | 0.01518174 | 1 | 11 | 0          | 0.9449689  |
| chr12 | 113254660 | 113513912 | 259253 | 7  | 0 | 4          | 0          | 0.00247414 | 1 | 10 | 0          | 1.52371709 |
| chr12 | 113513912 | 113545640 | 31729  | 4  | 0 | 5          | 0          | 0.00666883 | 1 | 11 | 0.30102999 | 1.20557689 |
| chr12 | 113545640 | 113640085 | 94446  | 4  | 0 | 5          | 0          | 0.01320236 | 1 | 10 | 0          | 0.97390707 |
| chr12 | 113640085 | 113640142 | 58     | 1  | 0 | 5          | 0          | 0.01320236 | 1 | 10 | 0.30102999 | 0.97390707 |
| chr12 | 113640142 | 113697112 | 56971  | 2  | 0 | 5          | 0          | 0.01320236 | 1 | 10 | 0          | 0.97390707 |
| chr12 | 113697112 | 113909823 | 212712 | 11 | 0 | 5          | 0          | 0.01320236 | 1 | 10 | 0.3010     |            |

|       |           |           |        |   |   |   |            |            |   |    |            |            |
|-------|-----------|-----------|--------|---|---|---|------------|------------|---|----|------------|------------|
| chr12 | 116476674 | 116550260 | 73587  | 1 | 0 | 1 | 0          | 0.00204627 | 1 | 6  | 0.30102999 | 1.31360226 |
| chr12 | 116550260 | 116632392 | 82133  | 3 | 0 | 2 | 0          | 0.01053319 | 2 | 6  | 0.61140001 | 0.91219088 |
| chr12 | 116632392 | 116695775 | 63384  | 1 | 0 | 2 | 0          | 0.0429175  | 2 | 4  | 0.61140001 | 0.47744371 |
| chr12 | 116695775 | 116732315 | 36541  | 2 | 0 | 4 | 0          | 0.11390336 | 2 | 5  | 0.61140001 | 0.30102999 |
| chr12 | 116732315 | 116732374 | 60     | 1 | 0 | 5 | 0          | 0.12309572 | 2 | 6  | 0.61140001 | 0.30102999 |
| chr12 | 116732374 | 116927061 | 194688 | 1 | 0 | 3 | 0          | 0.10122019 | 1 | 4  | 0.30102999 | 0.30102999 |
| chr12 | 116927061 | 117124643 | 197583 | 3 | 1 | 3 | 0.1218695  | 0.10122019 | 1 | 4  | 0.1218695  | 0.30102999 |
| chr12 | 117124643 | 117124702 | 60     | 1 | 1 | 4 | 0.1218695  | 0.11390336 | 1 | 5  | 0.1218695  | 0.30102999 |
| chr12 | 117124702 | 117174494 | 49793  | 2 | 1 | 4 | 0.1218695  | 0.18734596 | 1 | 4  | 0.1218695  | 0.18734596 |
| chr12 | 117174494 | 117300960 | 126467 | 4 | 1 | 4 | 0.1218695  | 0.11390336 | 1 | 5  | 0.1218695  | 0.30102999 |
| chr12 | 117300960 | 117432905 | 131946 | 2 | 1 | 4 | 0.1218695  | 0.18734596 | 1 | 4  | 0.1218695  | 0.18734596 |
| chr12 | 117432905 | 117450521 | 17617  | 2 | 1 | 5 | 0.1218695  | 0.12309572 | 1 | 6  | 0.1218695  | 0.30102999 |
| chr12 | 117450521 | 117491335 | 40815  | 1 | 0 | 5 | 0          | 0.12309572 | 1 | 6  | 0.30102999 | 0.30102999 |
| chr12 | 117491335 | 117619855 | 128521 | 4 | 0 | 6 | 0          | 0.20064824 | 1 | 6  | 0.30102999 | 0.20064824 |
| chr12 | 117619855 | 117624251 | 4397   | 2 | 0 | 6 | 0          | 0.129913   | 1 | 7  | 0.30102999 | 0.30102999 |
| chr12 | 117624251 | 117651749 | 27499  | 1 | 0 | 6 | 0          | 0.30102999 | 1 | 5  | 0.30102999 | 0.12309572 |
| chr12 | 117651749 | 117651808 | 60     | 1 | 1 | 6 | 0.1218695  | 0.20064824 | 1 | 6  | 0.1218695  | 0.20064824 |
| chr12 | 117651808 | 117769214 | 117407 | 4 | 0 | 6 | 0          | 0.30102999 | 1 | 5  | 0.30102999 | 0.12309572 |
| chr12 | 117769214 | 117799466 | 30253  | 2 | 0 | 7 | 0          | 0.30102999 | 1 | 6  | 0.30102999 | 0.129913   |
| chr12 | 117799466 | 117962514 | 163049 | 4 | 0 | 7 | 0          | 0.20469099 | 1 | 7  | 0.30102999 | 0.20469099 |
| chr12 | 117962514 | 117989509 | 26996  | 2 | 0 | 8 | 0          | 0.30102999 | 1 | 7  | 0.30102999 | 0.13499366 |
| chr12 | 117989509 | 118104215 | 114707 | 3 | 0 | 7 | 0          | 0.20469099 | 1 | 7  | 0.30102999 | 0.20469099 |
| chr12 | 118104215 | 118227078 | 122864 | 2 | 0 | 6 | 0          | 0.129913   | 1 | 7  | 0.30102999 | 0.30102999 |
| chr12 | 118227078 | 118287778 | 60701  | 1 | 0 | 6 | 0          | 0.20064824 | 1 | 6  | 0.30102999 | 0.20064824 |
| chr12 | 118287778 | 118404078 | 116301 | 4 | 0 | 6 | 0          | 0.129913   | 1 | 7  | 0.30102999 | 0.30102999 |
| chr12 | 118404078 | 118457535 | 53458  | 1 | 0 | 6 | 0          | 0.20064824 | 1 | 6  | 0.30102999 | 0.20064824 |
| chr12 | 118457535 | 118471911 | 14377  | 4 | 0 | 6 | 0          | 0.129913   | 1 | 7  | 0.30102999 | 0.30102999 |
| chr12 | 118471911 | 118503589 | 31679  | 1 | 0 | 6 | 0          | 0.20064824 | 1 | 6  | 0.30102999 | 0.20064824 |
| chr12 | 118503589 | 118539515 | 35927  | 1 | 0 | 6 | 0          | 0.30102999 | 1 | 0  | 0          | 0.12309572 |
| chr12 | 118539515 | 118539574 | 60     | 1 | 0 | 6 | 0          | 0.20064824 | 1 | 6  | 0          | 0.20064824 |
| chr12 | 118539574 | 118624738 | 85165  | 3 | 0 | 6 | 0          | 0.30102999 | 1 | 0  | 0          | 0.12309572 |
| chr12 | 118624738 | 118704470 | 79733  | 3 | 0 | 6 | 0          | 0.20064824 | 1 | 0  | 0          | 0.20064824 |
| chr12 | 118704470 | 118791867 | 87398  | 3 | 0 | 6 | 0          | 0.129913   | 1 | 7  | 0          | 0.30102999 |
| chr12 | 118791867 | 118850541 | 58675  | 1 | 0 | 5 | 0          | 0.07511598 | 0 | 7  | 0          | 0.43181735 |
| chr12 | 118850541 | 119019456 | 168916 | 1 | 0 | 4 | 0          | 0.06713722 | 0 | 6  | 0          | 0.44141547 |
| chr12 | 119019456 | 119188831 | 169376 | 1 | 0 | 4 | 0          | 0.11390336 | 0 | 5  | 0          | 0.30102999 |
| chr12 | 119188831 | 119299150 | 110320 | 2 | 0 | 5 | 0          | 0.12309572 | 0 | 6  | 0          | 0.30102999 |
| chr12 | 119299150 | 119484567 | 185418 | 3 | 0 | 4 | 0          | 0.06713722 | 0 | 6  | 0          | 0.44141547 |
| chr12 | 119484567 | 119554825 | 70259  | 2 | 0 | 4 | 0          | 0.11390336 | 0 | 5  | 0          | 0.30102999 |
| chr12 | 119554825 | 119629893 | 75069  | 1 | 0 | 3 | 0          | 0.05670724 | 0 | 5  | 0          | 0.45545077 |
| chr12 | 119629893 | 119724698 | 94806  | 1 | 0 | 2 | 0          | 0.02162467 | 0 | 2  | 0          | 0.68214471 |
| chr12 | 119724698 | 119724757 | 60     | 1 | 0 | 2 | 0          | 0.01053319 | 0 | 6  | 0          | 0.91219088 |
| chr12 | 119724757 | 119909829 | 185073 | 3 | 0 | 2 | 0          | 0.02162467 | 0 | 5  | 0          | 0.68214471 |
| chr12 | 119909829 | 119909888 | 60     | 1 | 0 | 2 | 0          | 0.00221948 | 0 | 8  | 0          | 1.44210395 |
| chr12 | 119909888 | 120020594 | 110707 | 2 | 0 | 2 | 0          | 0.02162467 | 0 | 7  | 0          | 0.68214471 |
| chr12 | 120020594 | 120153564 | 132971 | 4 | 0 | 2 | 0          | 0.00493743 | 0 | 5  | 0          | 1.16581773 |
| chr12 | 120153564 | 120168221 | 14658  | 2 | 0 | 2 | 0          | 9.54E-04   | 0 | 0  | 0          | 1.74076927 |
| chr12 | 120168221 | 120216682 | 48462  | 1 | 0 | 2 | 0          | 0.01053319 | 0 | 6  | 0          | 0.91219088 |
| chr12 | 120216682 | 120216741 | 60     | 1 | 0 | 2 | 0          | 0.01053319 | 1 | 6  | 0.30102999 | 0.91219088 |
| chr12 | 120216741 | 120346433 | 129693 | 3 | 0 | 2 | 0          | 0.01053319 | 0 | 6  | 0          | 0.91219088 |
| chr12 | 120346433 | 120346492 | 60     | 1 | 0 | 2 | 0          | 0.00221948 | 1 | 8  | 0.30102999 | 1.44210395 |
| chr12 | 120346492 | 120468141 | 121650 | 2 | 0 | 2 | 0          | 0.00221948 | 0 | 8  | 0          | 1.44210395 |
| chr12 | 120468141 | 120468200 | 60     | 1 | 0 | 3 | 0          | 0.00378107 | 0 | 9  | 0          | 1.33111237 |
| chr12 | 120468200 | 120532971 | 64772  | 1 | 0 | 3 | 0          | 0.0079614  | 0 | 8  | 0          | 1.07548421 |
| chr12 | 120532971 | 120538319 | 5349   | 2 | 0 | 3 | 0.30102999 | 0.0079614  | 0 | 8  | 0          | 1.07548421 |
| chr12 | 120538319 | 120637553 | 99235  | 2 | 0 | 3 | 0          | 0.0079614  | 0 | 8  | 0          | 1.07548421 |
| chr12 | 120637553 | 120648369 | 10817  | 2 | 0 | 3 | 0          | 0.00378107 | 0 | 9  | 0          | 1.33111237 |
| chr12 | 120648369 | 120700734 | 52366  | 2 | 0 | 3 | 0          | 0.0079614  | 0 | 8  | 0          | 1.07548421 |
| chr12 | 120700734 | 120725275 | 24542  | 1 | 0 | 3 | 0          | 0.00378107 | 0 | 9  | 0          | 1.33111237 |
| chr12 | 120725275 | 120725323 | 49     | 1 | 0 | 4 | 0          | 0.01077081 | 0 | 9  | 0          | 1.01542894 |
| chr12 | 120725323 | 120765590 | 40268  | 2 | 0 | 4 | 0          | 0.02074938 | 0 | 8  | 0          | 0.79906872 |
| chr12 | 120765590 | 120876483 | 110894 | 2 | 0 | 3 | 0          | 0.0079614  | 0 | 8  | 0          | 1.07548421 |
| chr12 | 120876483 | 120890858 | 14376  | 3 | 1 | 4 | 0.30102999 | 0.01077081 | 0 | 9  | 0          | 1.01542894 |
| chr12 | 120890858 | 120935826 | 44969  | 3 | 0 | 4 | 0          | 0.01077081 | 0 | 9  | 0          | 1.01542894 |
| chr12 | 120935826 | 120935883 | 60     | 1 | 1 | 5 | 0.30102999 | 0.01320236 | 0 | 10 | 0          | 0.97390707 |
| chr12 | 120935883 | 120961092 | 24218  | 1 | 0 | 5 | 0          | 0.01320236 | 0 | 10 | 0          | 0.97390707 |
| chr12 | 120961092 | 120965439 | 5338   | 2 | 0 | 5 | 0          | 0.00666883 | 0 | 11 | 0          | 1.20557689 |
| chr12 | 120965439 | 121089006 | 123668 | 2 | 0 | 5 | 0          | 0.01320236 | 0 | 10 | 0          | 0.97390707 |
| chr12 | 121089006 | 121161100 | 72095  | 2 | 0 | 5 | 0          | 0.02473314 | 0 | 9  | 0          | 0.76806864 |
| chr12 | 121161100 | 121241422 | 80323  | 7 | 0 | 5 | 0          | 0.00666883 | 0 | 11 | 0          | 1.20557689 |
| chr12 | 121241422 | 121241478 | 57     | 1 | 0 | 5 | 0          | 0.00317045 | 0 | 12 | 0          | 1.46403142 |
| chr12 | 121241478 | 121307694 | 66217  | 2 | 0 | 5 | 0          | 0.01320236 | 0 | 10 | 0          | 0.97390707 |
| chr12 | 121307694 | 121428571 | 120878 | 5 | 0 | 5 | 0          | 0.00666883 | 0 | 11 | 0          | 1.20557689 |
| chr12 | 121428571 | 121428630 | 60     | 1 | 0 | 5 | 0          | 0.00317045 | 0 | 12 | 0          | 1.46403142 |
| chr12 | 121428630 | 121441374 | 12745  | 2 | 0 | 4 | 0          | 0.00108487 | 0 | 12 | 0          | 1.81706455 |
| chr12 | 121441374 | 121496664 | 55291  | 2 | 0 | 5 | 0          | 0.00317045 | 0 | 12 | 0          | 1.46403142 |
| chr12 | 121496664 | 121496723 | 60     | 1 | 1 | 5 | 0.1218695  | 0.00317045 | 1 | 12 | 0.1218695  | 1.46403142 |
| chr12 | 121496723 | 121623267 | 126545 | 3 | 1 | 5 | 0.30102999 | 0.00317045 | 0 | 12 | 0          | 1.46403142 |
| chr12 | 121623267 | 121716835 | 93569  | 4 | 1 | 5 | 0.1218695  | 0.00317045 | 1 | 12 | 0.1218695  | 1.46403142 |
| chr12 | 121716835 | 121716894 | 60     | 1 | 2 | 5 | 0.30102999 | 0.00317045 | 1 | 12 | 0.05404976 | 1.46403142 |
| chr12 | 121716894 | 121788741 | 71848  | 4 | 2 | 5 | 0.30102999 | 0.00666883 | 1 | 11 | 0.05404976 | 1.20557689 |
| chr12 | 121788741 | 121861866 | 73126  | 2 | 2 | 5 | 0.30102999 | 0.01320236 | 1 | 10 | 0.05404976 | 0.97390707 |
| chr12 | 121861866 | 121895669 | 33804  | 3 | 2 | 5 | 0.30102999 | 0.00666883 | 1 | 11 | 0.05404976 | 1.20557689 |
| chr12 | 121895669 | 121954933 | 52965  | 2 | 2 | 5 | 0.61140001 | 0.01320236 | 0 | 10 | 0          | 0.97390707 |
| chr12 | 121954933 | 122070439 | 115507 | 1 | 1 | 5 | 0.30102999 | 0.01320236 | 0 | 10 | 0          | 0.97390707 |
| chr12 | 122070439 | 122080023 | 9585   | 3 | 1 | 5 | 0.30102999 | 0.00666883 | 0 | 11 | 0          | 1.20557689 |
| chr12 | 122080023 | 122102984 | 22962  | 1 | 1 | 5 | 0.30102999 | 0.01320236 | 0 | 10 | 0          | 0.97390707 |
| chr12 | 122102984 | 122156645 | 53662  | 1 | 1 | 5 | 0.30102999 | 0.02473314 | 0 | 9  | 0          | 0.76806864 |
| chr12 | 122156645 | 122227674 | 71030  | 1 | 0 | 5 | 0          | 0.04407651 | 0 | 8  | 0          | 0.58747015 |
| chr12 | 122227674 | 122389415 | 161742 | 6 | 0 | 6 | 0          | 0.04875589 | 0 | 9  | 0          | 0.5732208  |
| chr12 | 122389415 | 122423660 | 34246  | 1 | 0 | 5 | 0          | 0.02473314 | 0 | 9  | 0          | 0.76806864 |
| chr12 | 122423660 | 122423719 | 60     | 1 | 1 | 5 | 0.30102999 | 0.02473314 | 0 | 9  | 0          | 0.76806864 |
| chr12 | 122423719 | 122466282 | 42564  | 2 | 0 | 5 | 0          | 0.02473314 | 0 | 9  | 0          | 0.76806864 |
| chr12 | 122466282 | 122473208 | 6927   | 2 | 1 | 5 | 0.30102999 | 0.02473314 | 0 | 9  | 0          | 0.76806864 |
| chr12 | 122473208 | 122616822 | 143615 | 4 | 1 | 6 | 0.30102999 | 0.02793176 | 0 | 10 | 0          | 0.74627054 |
| chr12 | 122616822 | 122619580 | 2759   | 2 | 2 | 6 | 0.61140001 | 0.02793176 | 0 | 10 | 0          | 0.74627054 |
| chr12 | 122619580 |           |        |   |   |   |            |            |   |    |            |            |

|       |           |           |        |    |   |   |            |            |   |    |            |            |
|-------|-----------|-----------|--------|----|---|---|------------|------------|---|----|------------|------------|
| chr12 | 124290191 | 124427722 | 137532 | 3  | 3 | 4 | 0.51676182 | 0.11390336 | 1 | 5  | 0.02438896 | 0.30102999 |
| chr12 | 124427722 | 124427781 | 60     | 1  | 3 | 4 | 0.51676182 | 0.06713722 | 1 | 6  | 0.02438896 | 0.44141547 |
| chr12 | 124427781 | 124452792 | 25012  | 2  | 3 | 3 | 0.51676182 | 0.05670724 | 1 | 5  | 0.02438896 | 0.45545077 |
| chr12 | 124452792 | 124472216 | 19425  | 1  | 3 | 3 | 0.51676182 | 0.10122019 | 1 | 4  | 0.02438896 | 0.30102999 |
| chr12 | 124472216 | 124472275 | 60     | 1  | 4 | 3 | 0.76005302 | 0.10122019 | 1 | 4  | 0.01091641 | 0.30102999 |
| chr12 | 124472275 | 124540484 | 68210  | 3  | 3 | 3 | 0.51676182 | 0.10122019 | 1 | 4  | 0.02438896 | 0.30102999 |
| chr12 | 124540484 | 124726579 | 186096 | 1  | 2 | 3 | 0.30102999 | 0.10122019 | 1 | 4  | 0.05404976 | 0.30102999 |
| chr12 | 124726579 | 124726638 | 60     | 1  | 2 | 4 | 0.30102999 | 0.06713722 | 1 | 6  | 0.05404976 | 0.44141547 |
| chr12 | 124726638 | 124863098 | 136461 | 3  | 2 | 3 | 0.30102999 | 0.05670724 | 1 | 5  | 0.05404976 | 0.45545077 |
| chr12 | 124863098 | 124863148 | 51     | 1  | 2 | 4 | 0.30102999 | 0.11390336 | 1 | 5  | 0.05404976 | 0.30102999 |
| chr12 | 124863148 | 124896778 | 33631  | 2  | 2 | 3 | 0.30102999 | 0.10122019 | 1 | 4  | 0.05404976 | 0.30102999 |
| chr12 | 124896778 | 124964217 | 67440  | 2  | 2 | 3 | 0.30102999 | 0.17593012 | 1 | 3  | 0.05404976 | 0.17593012 |
| chr12 | 124964217 | 124964276 | 60     | 1  | 2 | 3 | 0.30102999 | 0.10122019 | 1 | 4  | 0.05404976 | 0.30102999 |
| chr12 | 124964276 | 125012928 | 48653  | 1  | 2 | 2 | 0.30102999 | 0.08289318 | 1 | 3  | 0.05404976 | 0.30102999 |
| chr12 | 125012928 | 125178836 | 165909 | 1  | 1 | 2 | 0.1218695  | 0.08289318 | 1 | 3  | 0.1218695  | 0.30102999 |
| chr12 | 125178836 | 125178895 | 60     | 1  | 1 | 2 | 0.1218695  | 0.1053319  | 1 | 6  | 0.1218695  | 0.91219088 |
| chr12 | 125178895 | 125267374 | 88480  | 1  | 1 | 2 | 0.30102999 | 0.1053319  | 1 | 6  | 0          | 0.91219088 |
| chr12 | 125267374 | 125341053 | 73680  | 4  | 1 | 3 | 0.30102999 | 0.0079642  | 0 | 8  | 0          | 1.07548421 |
| chr12 | 125341053 | 125342150 | 91098  | 2  | 1 | 2 | 0.30102999 | 0.1053319  | 0 | 6  | 0          | 0.91219088 |
| chr12 | 125342150 | 125470644 | 38495  | 1  | 2 | 2 | 0.30102999 | 0.02162467 | 0 | 5  | 0          | 0.68214471 |
| chr12 | 125470644 | 125487626 | 16983  | 2  | 1 | 2 | 0.30102999 | 0.1053319  | 0 | 6  | 0          | 0.91219088 |
| chr12 | 125487626 | 12549432  | 61807  | 1  | 1 | 2 | 0.30102999 | 0.0429175  | 0 | 4  | 0          | 0.47744371 |
| chr12 | 12549432  | 125824932 | 275501 | 6  | 1 | 2 | 0.30102999 | 0.02162467 | 0 | 5  | 0          | 0.68214471 |
| chr12 | 125824932 | 125866776 | 41845  | 1  | 1 | 2 | 0.30102999 | 0.0429175  | 0 | 4  | 0          | 0.47744371 |
| chr12 | 125866776 | 125918393 | 51618  | 1  | 1 | 2 | 0.30102999 | 0.02162467 | 0 | 5  | 0          | 0.68214471 |
| chr12 | 125918393 | 125918452 | 60     | 1  | 1 | 3 | 0.30102999 | 0.1598258  | 0 | 7  | 0          | 0.84395715 |
| chr12 | 125918452 | 125988721 | 70270  | 1  | 1 | 3 | 0.30102999 | 0.03070643 | 0 | 6  | 0          | 0.63695542 |
| chr12 | 125988721 | 126055149 | 66429  | 2  | 1 | 4 | 0.30102999 | 0.06713722 | 0 | 6  | 0          | 0.44141547 |
| chr12 | 126055149 | 126055208 | 60     | 1  | 1 | 4 | 0.30102999 | 0.03812622 | 0 | 6  | 0          | 0.60763643 |
| chr12 | 126055208 | 126107833 | 52626  | 1  | 1 | 3 | 0.30102999 | 0.03070643 | 0 | 6  | 0          | 0.63695542 |
| chr12 | 126107833 | 126225084 | 117252 | 1  | 1 | 3 | 0.30102999 | 0.05670724 | 0 | 5  | 0          | 0.45545077 |
| chr12 | 126225084 | 126225143 | 60     | 1  | 1 | 4 | 0.30102999 | 0.11390336 | 0 | 5  | 0          | 0.30102999 |
| chr12 | 126225143 | 126482698 | 257556 | 1  | 1 | 2 | 0.30102999 | 0.0429175  | 0 | 4  | 0          | 0.47744371 |
| chr12 | 126482698 | 126482757 | 60     | 1  | 1 | 4 | 0.30102999 | 0.11390336 | 0 | 5  | 0          | 0.30102999 |
| chr12 | 126482757 | 126697503 | 214747 | 1  | 0 | 4 | 0          | 0.30102999 | 0 | 0  | 0          | 0.10122019 |
| chr12 | 126697503 | 126916166 | 218664 | 3  | 0 | 4 | 0          | 0.18734596 | 0 | 4  | 0          | 0.18734596 |
| chr12 | 126916166 | 126916225 | 60     | 1  | 0 | 4 | 0          | 0.06713722 | 0 | 6  | 0          | 0.44141547 |
| chr12 | 126916225 | 126981922 | 65698  | 1  | 0 | 3 | 0          | 0.10122019 | 0 | 4  | 0          | 0.30102999 |
| chr12 | 126981922 | 127071993 | 90072  | 1  | 0 | 3 | 0          | 0.17593012 | 0 | 3  | 0          | 0.17593012 |
| chr12 | 127071993 | 127072052 | 60     | 1  | 0 | 5 | 0          | 0.45545077 | 0 | 3  | 0          | 0.05670724 |
| chr12 | 127072052 | 12775492  | 703441 | 7  | 0 | 4 | 0          | 0.76005302 | 0 | 1  | 0          | 0.01091641 |
| chr12 | 12775492  | 128119366 | 343875 | 2  | 0 | 3 | 0          | 0.51676182 | 0 | 1  | 0          | 0.02438896 |
| chr12 | 128119366 | 128119425 | 60     | 1  | 0 | 3 | 0          | 0.17593012 | 0 | 3  | 0          | 0.17593012 |
| chr12 | 128119425 | 128436060 | 316636 | 2  | 0 | 3 | 0          | 0.51676182 | 0 | 1  | 0          | 0.02438896 |
| chr12 | 128436060 | 128680324 | 244265 | 2  | 0 | 5 | 0          | 0.30102999 | 0 | 5  | 0          | 0.11390336 |
| chr12 | 128680324 | 128680383 | 60     | 1  | 0 | 5 | 0          | 0.19510895 | 0 | 5  | 0          | 0.19510895 |
| chr12 | 128680383 | 128936129 | 255747 | 2  | 0 | 3 | 0          | 0.05670724 | 0 | 5  | 0          | 0.45545077 |
| chr12 | 128936129 | 128936188 | 60     | 1  | 0 | 4 | 0          | 0.03812622 | 0 | 7  | 0          | 0.60763643 |
| chr12 | 128936188 | 128995008 | 58821  | 1  | 0 | 4 | 0          | 0.11390336 | 0 | 5  | 0          | 0.30102999 |
| chr12 | 128995008 | 129068800 | 73793  | 1  | 0 | 4 | 0          | 0.18734596 | 0 | 4  | 0          | 0.18734596 |
| chr12 | 129068800 | 129191237 | 122438 | 3  | 0 | 4 | 0          | 0.11390336 | 0 | 5  | 0          | 0.30102999 |
| chr12 | 129191237 | 129191296 | 60     | 1  | 0 | 6 | 0          | 0.08122616 | 0 | 8  | 0          | 0.4250187  |
| chr12 | 129191296 | 129278199 | 86904  | 1  | 0 | 5 | 0          | 0.07511598 | 0 | 7  | 0          | 0.43181735 |
| chr12 | 129278199 | 129298500 | 20302  | 2  | 1 | 5 | 0.30102999 | 0.07511598 | 0 | 7  | 0          | 0.43181735 |
| chr12 | 129298500 | 129326328 | 27829  | 2  | 1 | 5 | 0.30102999 | 0.04407651 | 0 | 8  | 0          | 0.58747015 |
| chr12 | 129326328 | 129376040 | 49713  | 2  | 1 | 5 | 0.30102999 | 0.07511598 | 0 | 7  | 0          | 0.43181735 |
| chr12 | 129376040 | 129376099 | 60     | 1  | 1 | 6 | 0.30102999 | 0.04875589 | 0 | 9  | 0          | 0.5732208  |
| chr12 | 129376099 | 129429923 | 53825  | 2  | 1 | 6 | 0.30102999 | 0.129913   | 0 | 7  | 0          | 0.30102999 |
| chr12 | 129429923 | 129467511 | 37589  | 1  | 1 | 5 | 0.30102999 | 0.07511598 | 0 | 7  | 0          | 0.43181735 |
| chr12 | 129467511 | 129566202 | 98692  | 3  | 1 | 5 | 0.30102999 | 0.04407651 | 0 | 8  | 0          | 0.58747015 |
| chr12 | 129566202 | 129626896 | 60695  | 1  | 1 | 4 | 0.30102999 | 0.02074938 | 0 | 8  | 0          | 0.79906872 |
| chr12 | 129626896 | 129672055 | 45160  | 1  | 1 | 4 | 0.30102999 | 0.03812622 | 0 | 7  | 0          | 0.60763643 |
| chr12 | 129672055 | 129672114 | 60     | 1  | 1 | 4 | 0.61140001 | 0.02074938 | 0 | 8  | 0          | 0.79906872 |
| chr12 | 129672114 | 129714058 | 41945  | 1  | 1 | 4 | 0.30102999 | 0.03812622 | 0 | 7  | 0          | 0.60763643 |
| chr12 | 129714058 | 129789818 | 75761  | 2  | 1 | 4 | 0.30102999 | 0.01077081 | 0 | 9  | 0          | 1.01542894 |
| chr12 | 129789818 | 129789877 | 60     | 1  | 1 | 5 | 0.30102999 | 0.01202336 | 0 | 10 | 0          | 0.97390707 |
| chr12 | 129789877 | 129930273 | 140397 | 2  | 1 | 5 | 0.30102999 | 0.04407651 | 0 | 8  | 0          | 0.58747015 |
| chr12 | 129930273 | 129973552 | 43280  | 1  | 1 | 5 | 0.30102999 | 0.02473314 | 0 | 9  | 0          | 0.76806864 |
| chr12 | 129973552 | 130045724 | 72173  | 2  | 1 | 5 | 0.61140001 | 0.02473314 | 0 | 9  | 0          | 0.76806864 |
| chr12 | 130045724 | 130045783 | 60     | 1  | 1 | 2 | 0.61140001 | 0.01320236 | 0 | 10 | 0          | 0.97390707 |
| chr12 | 130045783 | 130099125 | 53343  | 1  | 1 | 2 | 0.30102999 | 0.01320236 | 0 | 10 | 0          | 0.97390707 |
| chr12 | 130099125 | 130160411 | 61287  | 1  | 1 | 5 | 0.30102999 | 0.02473314 | 0 | 9  | 0          | 0.76806864 |
| chr12 | 130160411 | 130226325 | 65915  | 2  | 1 | 5 | 0.61140001 | 0.02473314 | 0 | 9  | 0          | 0.76806864 |
| chr12 | 130226325 | 130292864 | 66540  | 2  | 1 | 5 | 0.30102999 | 0.02473314 | 0 | 9  | 0          | 0.76806864 |
| chr12 | 130292864 | 130354278 | 61415  | 1  | 1 | 5 | 0.30102999 | 0.04407651 | 0 | 8  | 0          | 0.58747015 |
| chr12 | 130354278 | 130376880 | 22603  | 2  | 2 | 5 | 0.61140001 | 0.04407651 | 0 | 8  | 0          | 0.58747015 |
| chr12 | 130376880 | 130376939 | 60     | 1  | 2 | 6 | 0.61140001 | 0.04875589 | 0 | 9  | 0          | 0.5732208  |
| chr12 | 130376939 | 130452266 | 75328  | 1  | 2 | 6 | 0.61140001 | 0.129913   | 0 | 7  | 0          | 0.30102999 |
| chr12 | 130452266 | 130526203 | 73938  | 1  | 2 | 5 | 0.61140001 | 0.07511598 | 0 | 7  | 0          | 0.43181735 |
| chr12 | 130526203 | 130567591 | 41389  | 1  | 2 | 5 | 0.61140001 | 0.12309572 | 0 | 6  | 0          | 0.30102999 |
| chr12 | 130567591 | 130648869 | 81279  | 1  | 1 | 5 | 0.30102999 | 0.12309572 | 0 | 6  | 0          | 0.30102999 |
| chr12 | 130648869 | 131133039 | 484171 | 10 | 1 | 5 | 0.30102999 | 0.07511598 | 0 | 7  | 0          | 0.43181735 |
| chr12 | 131133039 | 131171871 | 38833  | 1  | 1 | 5 | 0.30102999 | 0.12309572 | 0 | 6  | 0          | 0.30102999 |
| chr12 | 131171871 | 131297476 | 125066 | 3  | 1 | 5 | 0.30102999 | 0.30102999 | 0 | 4  | 0          | 0.11390336 |
| chr12 | 131297476 | 131357719 | 60244  | 3  | 1 | 5 | 0.30102999 | 0.19510895 | 0 | 5  | 0          | 0.19510895 |
| chr12 | 131357719 | 131361379 | 3661   | 3  | 1 | 5 | 0.1218695  | 0.07511598 | 0 | 7  | 0.1218695  | 0.43181735 |
| chr12 | 131361379 | 131450373 | 88995  | 2  | 1 | 5 | 0.30102999 | 0.19510895 | 0 | 5  | 0          | 0.19510895 |
| chr12 | 131450373 | 131450432 | 60     | 1  | 1 | 5 | 0.1218695  | 0.04407651 | 1 | 8  | 0.1218695  | 0.58747015 |
| chr12 | 131450432 | 131473774 | 23343  | 1  | 1 | 5 | 0.1218695  | 0.12309572 | 1 | 6  | 0.1218695  | 0.30102999 |
| chr12 | 131473774 | 131534036 | 60263  | 2  | 1 | 5 | 0.30102999 | 0.12309572 | 0 | 6  | 0          | 0.30102999 |
| chr12 | 131534036 | 131574793 | 40758  | 1  | 1 | 5 | 0.30102999 | 0.07511598 | 0 | 7  | 0          | 0.43181735 |
| chr12 | 131574793 | 131652809 | 78017  | 2  | 1 | 5 | 0.30102999 | 0.04407651 | 0 | 8  | 0          | 0.58747015 |
| chr12 | 131652809 | 131801811 | 149003 | 3  | 1 | 5 | 0.1218695  | 0.04407651 | 1 | 8  | 0.1218695  | 0.58747015 |
| chr12 | 131801811 | 132227279 | 425469 | 7  | 1 | 5 | 0.30102999 | 0.04407651 | 0 | 8  | 0          | 0.58747015 |
|       |           |           |        |    |   |   |            |            |   |    |            |            |

|       |          |          |        |   |   |   |            |            |   |   |              |            |
|-------|----------|----------|--------|---|---|---|------------|------------|---|---|--------------|------------|
| chr13 | 20153689 | 20206599 | 52911  | 2 | 1 | 3 | 0.30102999 | 0.30102999 | 0 | 2 | 0            | 0.08289318 |
| chr13 | 20206599 | 20281332 | 74734  | 3 | 1 | 3 | 0.30102999 | 0.51676182 | 0 | 1 | 0            | 0.02438896 |
| chr13 | 20281332 | 20285281 | 3950   | 1 | 1 | 2 | 0.30102999 | 0.30102999 | 0 | 1 | 0            | 0.05404976 |
| chr13 | 20285281 | 20356966 | 71686  | 2 | 1 | 2 | 0.30102999 | 0.1575501  | 0 | 2 | 0            | 0.1575501  |
| chr13 | 20356966 | 20419333 | 62368  | 4 | 1 | 3 | 0.30102999 | 0.30102999 | 0 | 2 | 0            | 0.08289318 |
| chr13 | 20419333 | 20431339 | 12007  | 2 | 1 | 4 | 0.30102999 | 0.30102999 | 0 | 3 | 0            | 0.10122019 |
| chr13 | 20431339 | 20482708 | 51370  | 1 | 1 | 3 | 0.30102999 | 0.30102999 | 0 | 2 | 0            | 0.08289318 |
| chr13 | 20482708 | 20482767 | 60     | 1 | 1 | 3 | 0.30102999 | 0.17593012 | 0 | 3 | 0            | 0.17593012 |
| chr13 | 20482767 | 20530643 | 47877  | 1 | 1 | 2 | 0.30102999 | 0.08289318 | 0 | 3 | 0            | 0.30102999 |
| chr13 | 20530643 | 20530702 | 60     | 1 | 1 | 4 | 0.30102999 | 0.30102999 | 0 | 2 | 0            | 0.10122019 |
| chr13 | 20530702 | 20618734 | 88033  | 2 | 1 | 3 | 0.30102999 | 0.30102999 | 0 | 3 | 0            | 0.08289318 |
| chr13 | 20618734 | 20633721 | 14988  | 2 | 1 | 3 | 0.30102999 | 0.17593012 | 0 | 2 | 0            | 0.17593012 |
| chr13 | 20633721 | 20715922 | 82202  | 2 | 1 | 3 | 0.30102999 | 0.51676182 | 0 | 1 | 0            | 0.02438896 |
| chr13 | 20715922 | 20715972 | 51     | 1 | 2 | 3 | 0.61140001 | 0.51676182 | 0 | 1 | 0            | 0.02438896 |
| chr13 | 20715972 | 20762781 | 46810  | 1 | 1 | 3 | 0.30102999 | 0.51676182 | 0 | 1 | 0            | 0.02438896 |
| chr13 | 20762781 | 20797139 | 34359  | 2 | 1 | 3 | 0.30102999 | 0.30102999 | 0 | 2 | 0            | 0.08289318 |
| chr13 | 20797139 | 20919037 | 121899 | 2 | 1 | 3 | 0.30102999 | 0.17593012 | 0 | 3 | 0            | 0.17593012 |
| chr13 | 20919037 | 20977814 | 58778  | 1 | 1 | 5 | 0.30102999 | 0.30102999 | 0 | 4 | 0            | 0.11390336 |
| chr13 | 20977814 | 21059910 | 82097  | 2 | 1 | 5 | 0.30102999 | 0.44141547 | 0 | 4 | 0            | 0.06713722 |
| chr13 | 21059910 | 21113534 | 53625  | 2 | 1 | 7 | 0.30102999 | 0.60763643 | 0 | 4 | 0            | 0.03812622 |
| chr13 | 21113534 | 21189951 | 76418  | 2 | 1 | 6 | 0.30102999 | 0.44141547 | 0 | 4 | 0            | 0.06713722 |
| chr13 | 21189951 | 21284906 | 94956  | 3 | 1 | 6 | 0.1218695  | 0.44141547 | 1 | 4 | 0.1218695    | 0.06713722 |
| chr13 | 21284906 | 21284965 | 60     | 1 | 1 | 2 | 0.30102999 | 0.44141547 | 1 | 1 | 0.05404976   | 0.06713722 |
| chr13 | 21284965 | 21287726 | 2762   | 1 | 1 | 6 | 0.1218695  | 0.44141547 | 1 | 4 | 0.1218695    | 0.06713722 |
| chr13 | 21287726 | 21417979 | 130254 | 4 | 1 | 6 | 0.1218695  | 0.30102999 | 1 | 5 | 0.1218695    | 0.12309572 |
| chr13 | 21417979 | 21418038 | 60     | 1 | 1 | 7 | 0.1218695  | 0.43181735 | 1 | 5 | 0.1218695    | 0.07511598 |
| chr13 | 21418038 | 21460009 | 41972  | 1 | 1 | 6 | 0.1218695  | 0.30102999 | 1 | 5 | 0.1218695    | 0.12309572 |
| chr13 | 21460009 | 21502010 | 42002  | 1 | 1 | 6 | 0.1218695  | 0.20064824 | 1 | 6 | 0.1218695    | 0.20064824 |
| chr13 | 21502010 | 21561423 | 59414  | 2 | 1 | 6 | 0.1218695  | 0.44141547 | 1 | 4 | 0.1218695    | 0.06713722 |
| chr13 | 21561423 | 21561482 | 60     | 1 | 1 | 6 | 0.1218695  | 0.30102999 | 1 | 5 | 0.1218695    | 0.12309572 |
| chr13 | 21561482 | 21620209 | 58728  | 1 | 1 | 3 | 0.1218695  | 0.10122019 | 1 | 4 | 0.1218695    | 0.30102999 |
| chr13 | 21620209 | 21751522 | 131314 | 4 | 1 | 3 | 0.30102999 | 0.10122019 | 0 | 4 | 0            | 0.30102999 |
| chr13 | 21751522 | 21751581 | 60     | 1 | 1 | 4 | 0.1218695  | 0.18734596 | 1 | 4 | 0.1218695    | 0.18734596 |
| chr13 | 21751581 | 21861191 | 109611 | 2 | 1 | 2 | 0.1218695  | 0.0429175  | 1 | 4 | 0.1218695    | 0.47744371 |
| chr13 | 21861191 | 21907834 | 46644  | 2 | 1 | 3 | 0.1218695  | 0.10122019 | 1 | 4 | 0.1218695    | 0.30102999 |
| chr13 | 21907834 | 21945856 | 38023  | 1 | 1 | 3 | 0.1218695  | 0.17593012 | 1 | 3 | 0.1218695    | 0.17593012 |
| chr13 | 21945856 | 21948905 | 3050   | 1 | 1 | 4 | 0.1218695  | 0.30102999 | 1 | 3 | 0.1218695    | 0.10122019 |
| chr13 | 21948905 | 22066814 | 117910 | 3 | 1 | 3 | 0.1218695  | 0.17593012 | 1 | 3 | 0.1218695    | 0.17593012 |
| chr13 | 22066814 | 22113477 | 46664  | 2 | 1 | 4 | 0.1218695  | 0.30102999 | 1 | 3 | 0.1218695    | 0.10122019 |
| chr13 | 22113477 | 22196241 | 82765  | 3 | 1 | 3 | 0.1218695  | 0.17593012 | 1 | 3 | 0.1218695    | 0.17593012 |
| chr13 | 22196241 | 22271014 | 74774  | 2 | 1 | 3 | 0.30102999 | 0.30102999 | 0 | 2 | 0            | 0.08289318 |
| chr13 | 22271014 | 22405379 | 134366 | 2 | 1 | 2 | 0.30102999 | 0.1575501  | 0 | 2 | 0            | 0.1575501  |
| chr13 | 22405379 | 22405438 | 60     | 1 | 1 | 3 | 0.30102999 | 0.17593012 | 0 | 3 | 0            | 0.17593012 |
| chr13 | 22405438 | 22516500 | 111063 | 1 | 1 | 2 | 0.30102999 | 0.1575501  | 0 | 2 | 0            | 0.1575501  |
| chr13 | 22516500 | 22516559 | 60     | 1 | 1 | 2 | 0.1218695  | 0.1575501  | 0 | 2 | 0.1218695    | 0.1575501  |
| chr13 | 22516559 | 22747528 | 230970 | 3 | 1 | 2 | 0.30102999 | 0.30102999 | 0 | 1 | 0            | 0.05404976 |
| chr13 | 22747528 | 22747587 | 60     | 1 | 1 | 2 | 0.1218695  | 0.30102999 | 1 | 1 | 0.1218695    | 0.05404976 |
| chr13 | 22747587 | 22995869 | 248283 | 3 | 1 | 1 | 0.1218695  | 0.1218695  | 1 | 1 | 0.1218695    | 0.1218695  |
| chr13 | 22995869 | 23376271 | 380403 | 3 | 1 | 1 | 0.30102999 | 0.1218695  | 0 | 1 | 0            | 0.1218695  |
| chr13 | 23376271 | 23376330 | 60     | 1 | 1 | 1 | 0.05404976 | 0.1218695  | 2 | 1 | 0.30102999   | 0.1218695  |
| chr13 | 23376330 | 23439765 | 63436  | 1 | 1 | 1 | 0.1218695  | 0.1218695  | 1 | 1 | 0.1218695    | 0.1218695  |
| chr13 | 23439765 | 23566962 | 127198 | 3 | 1 | 2 | 0.1218695  | 0.30102999 | 1 | 1 | 0.1218695    | 0.05404976 |
| chr13 | 23566962 | 23777913 | 210952 | 5 | 1 | 3 | 0.1218695  | 0.51676182 | 1 | 1 | 0.1218695    | 0.02438896 |
| chr13 | 23777913 | 23853475 | 75563  | 2 | 1 | 3 | 0.1218695  | 0.76005302 | 1 | 1 | 0.1218695    | 0.01091641 |
| chr13 | 23853475 | 23948520 | 95046  | 4 | 1 | 4 | 0.1218695  | 0.47744371 | 1 | 2 | 0.1218695    | 0.0429175  |
| chr13 | 23948520 | 23989744 | 41225  | 2 | 1 | 4 | 0.1218695  | 0.30102999 | 1 | 3 | 0.1218695    | 0.10122019 |
| chr13 | 23989744 | 24164319 | 174576 | 3 | 1 | 4 | 0.30102999 | 0.30102999 | 0 | 3 | 0            | 0.10122019 |
| chr13 | 24164319 | 24164378 | 60     | 1 | 1 | 5 | 0.1218695  | 0.19510895 | 1 | 5 | 0.1218695    | 0.19510895 |
| chr13 | 24164378 | 24200833 | 36456  | 1 | 1 | 4 | 0.1218695  | 0.18734596 | 1 | 4 | 0.1218695    | 0.18734596 |
| chr13 | 24200833 | 24200890 | 58     | 1 | 1 | 4 | 0.05404976 | 0.18734596 | 2 | 4 | 0.30102999   | 0.18734596 |
| chr13 | 24200890 | 24334216 | 133327 | 2 | 1 | 4 | 0.30102999 | 0.18734596 | 1 | 4 | 0            | 0.18734596 |
| chr13 | 24334216 | 24334267 | 52     | 1 | 1 | 5 | 0.30102999 | 0.12309572 | 0 | 6 | 0            | 0.30102999 |
| chr13 | 24334267 | 24406631 | 72365  | 2 | 1 | 4 | 0.30102999 | 0.18734596 | 1 | 4 | 0            | 0.18734596 |
| chr13 | 24406631 | 24432194 | 25564  | 2 | 1 | 4 | 0.1218695  | 0.18734596 | 1 | 4 | 0.1218695    | 0.18734596 |
| chr13 | 24432194 | 24488224 | 57031  | 1 | 1 | 4 | 0.30102999 | 0.18734596 | 0 | 4 | 0            | 0.18734596 |
| chr13 | 24488224 | 24569281 | 80058  | 1 | 1 | 5 | 0.30102999 | 0.12309572 | 0 | 6 | 0            | 0.30102999 |
| chr13 | 24569281 | 24569340 | 60     | 1 | 1 | 5 | 0.1218695  | 0.12309572 | 1 | 6 | 0.1218695    | 0.30102999 |
| chr13 | 24569340 | 24653149 | 83810  | 1 | 1 | 4 | 0.1218695  | 0.06713722 | 1 | 6 | 0.1218695    | 0.44141547 |
| chr13 | 24653149 | 24727786 | 74638  | 2 | 1 | 4 | 0.1218695  | 0.30102999 | 1 | 3 | 0.1218695    | 0.10122019 |
| chr13 | 24727786 | 24727845 | 60     | 1 | 1 | 4 | 0.1218695  | 0.18734596 | 1 | 4 | 0.1218695    | 0.18734596 |
| chr13 | 24727845 | 24768859 | 41015  | 1 | 1 | 4 | 0.30102999 | 0.18734596 | 0 | 4 | 0            | 0.18734596 |
| chr13 | 24768859 | 24768918 | 60     | 1 | 1 | 5 | 0.30102999 | 0.12309572 | 0 | 6 | 0            | 0.30102999 |
| chr13 | 24768918 | 24807317 | 38400  | 2 | 1 | 4 | 0.30102999 | 0.06713722 | 0 | 6 | 0            | 0.44141547 |
| chr13 | 24807317 | 24910684 | 103368 | 2 | 1 | 4 | 0.30102999 | 0.30102999 | 0 | 3 | 0            | 0.10122019 |
| chr13 | 24910684 | 24910743 | 60     | 1 | 1 | 4 | 0.1218695  | 0.11390336 | 1 | 5 | 0.1218695    | 0.30102999 |
| chr13 | 24910743 | 25008701 | 97959  | 2 | 1 | 4 | 0.30102999 | 0.18734596 | 0 | 4 | 0            | 0.18734596 |
| chr13 | 25008701 | 25008754 | 54     | 1 | 1 | 4 | 0.30102999 | 0.11390336 | 0 | 5 | 0            | 0.30102999 |
| chr13 | 25008754 | 25077262 | 68509  | 2 | 1 | 4 | 0.30102999 | 0.18734596 | 0 | 4 | 0            | 0.18734596 |
| chr13 | 25077262 | 25077314 | 53     | 1 | 1 | 4 | 0.1218695  | 0.11390336 | 1 | 5 | 0.1218695    | 0.30102999 |
| chr13 | 25077314 | 25225538 | 148225 | 4 | 1 | 4 | 0.1218695  | 0.18734596 | 1 | 4 | 0.1218695    | 0.18734596 |
| chr13 | 25225538 | 25285987 | 60450  | 1 | 1 | 4 | 0.05404976 | 0.11390336 | 2 | 5 | 0.30102999   | 0.30102999 |
| chr13 | 25285987 | 25356020 | 70034  | 1 | 1 | 4 | 0.1218695  | 0.11390336 | 1 | 5 | 0.1218695    | 0.30102999 |
| chr13 | 25356020 | 25356079 | 60     | 1 | 1 | 5 | 0.1218695  | 0.19510895 | 1 | 5 | 0.1218695    | 0.19510895 |
| chr13 | 25356079 | 25436891 | 80813  | 2 | 1 | 5 | 0.30102999 | 0.19510895 | 0 | 5 | 0            | 0.19510895 |
| chr13 | 25436891 | 25479393 | 42503  | 1 | 1 | 5 | 0.30102999 | 0.30102999 | 0 | 4 | 0            | 0.11390336 |
| chr13 | 25479393 | 25498398 | 19006  | 2 | 1 | 5 | 0.30102999 | 0.19510895 | 0 | 5 | 0            | 0.19510895 |
| chr13 | 25498398 | 25534203 | 35806  | 2 | 1 | 6 | 0.30102999 | 0.30102999 | 0 | 5 | 0            | 0.12309572 |
| chr13 | 25534203 | 25622740 | 88538  | 1 | 1 | 6 | 0.30102999 | 0.44141547 | 0 | 4 | 0            | 0.06713722 |
| chr13 | 25622740 | 25669971 | 47232  | 1 | 1 | 5 | 0.05404976 | 0.30102999 | 2 | 5 | 0.30102999   | 0.12309572 |
| chr13 | 25669971 | 25815415 | 145445 | 5 | 1 | 5 | 0.05404976 | 0.30102999 | 2 | 4 | 0.30102999   | 0.11390336 |
| chr13 | 25815415 | 25909238 | 93824  | 4 | 1 | 5 | 0.05404976 | 0.19510895 | 2 | 5 | 0.30102999   | 0.19510895 |
| chr13 | 25909238 | 25909297 | 60     | 1 | 1 | 6 | 0.05404976 | 0.04875589 | 2 | 9 | 0.30102999   | 0.5732208  |
| chr13 | 25909297 | 25953313 | 44017  | 2 | 1 | 6 | 0.05404976 | 0.08122616 | 2 | 8 | 0.30102999</ |            |

|       |          |          |        |   |   |   |   |              |   |    |            |            |
|-------|----------|----------|--------|---|---|---|---|--------------|---|----|------------|------------|
| chr13 | 2733072  | 27521122 | 188051 | 2 | 0 | 4 | 0 | 0.02074938   | 0 | 8  | 0          | 0.79906872 |
| chr13 | 27521122 | 27521181 | 60     | 1 | 0 | 4 | 0 | 0.01077081   | 0 | 9  | 0          | 1.01542894 |
| chr13 | 27521181 | 27620031 | 98851  | 2 | 0 | 4 | 0 | 0.02074938   | 0 | 8  | 0          | 0.79906872 |
| chr13 | 27620031 | 27720081 | 100780 | 3 | 0 | 5 | 0 | 0.02473314   | 0 | 9  | 0          | 0.76806864 |
| chr13 | 27720081 | 27749138 | 28329  | 2 | 0 | 0 | 0 | 0.04875589   | 0 | 9  | 0          | 0.5732208  |
| chr13 | 27749138 | 27868211 | 119074 | 3 | 0 | 6 | 0 | 0.08122616   | 0 | 8  | 0          | 0.4250187  |
| chr13 | 27868211 | 27969802 | 101592 | 2 | 0 | 6 | 0 | 0.129913     | 0 | 7  | 0          | 0.30102999 |
| chr13 | 27969802 | 27969861 | 60     | 1 | 0 | 6 | 0 | 0.02793176   | 0 | 10 | 0          | 0.74627054 |
| chr13 | 27969861 | 28021442 | 51582  | 2 | 0 | 6 | 0 | 0.129913     | 0 | 7  | 0          | 0.30102999 |
| chr13 | 28021442 | 28021501 | 60     | 1 | 0 | 6 | 0 | 0.02793176   | 0 | 10 | 0          | 0.74627054 |
| chr13 | 28021501 | 28115389 | 93889  | 1 | 0 | 6 | 0 | 0.08122616   | 0 | 8  | 0          | 0.4250187  |
| chr13 | 28115389 | 28175193 | 59805  | 3 | 0 | 6 | 0 | 0.04875589   | 0 | 9  | 0          | 0.5732208  |
| chr13 | 28175193 | 28197411 | 22219  | 1 | 0 | 6 | 0 | 0.08122616   | 0 | 8  | 0          | 0.4250187  |
| chr13 | 28197411 | 28240922 | 43512  | 1 | 0 | 5 | 0 | 0.07511598   | 0 | 7  | 0          | 0.43181735 |
| chr13 | 28240922 | 28296658 | 55737  | 1 | 0 | 4 | 0 | 0.03812622   | 0 | 7  | 0          | 0.60763643 |
| chr13 | 28296658 | 28379980 | 83323  | 2 | 0 | 4 | 0 | 0.02074938   | 2 | 8  | 0.61140001 | 0.79906872 |
| chr13 | 28379980 | 28380039 | 60     | 1 | 0 | 5 | 0 | 0.04407651   | 2 | 8  | 0.61140001 | 0.58747015 |
| chr13 | 28380039 | 28578168 | 198130 | 8 | 0 | 5 | 0 | 0.04407651   | 1 | 8  | 0.30102999 | 0.58747015 |
| chr13 | 28578168 | 28644689 | 66522  | 2 | 0 | 4 | 0 | 0.02074938   | 1 | 8  | 0.30102999 | 0.79906872 |
| chr13 | 28644689 | 28675372 | 30684  | 2 | 0 | 6 | 0 | 0.08122616   | 2 | 8  | 0.61140001 | 0.4250187  |
| chr13 | 28675372 | 28675431 | 60     | 1 | 0 | 6 | 0 | 0.04875589   | 2 | 9  | 0.61140001 | 0.5732208  |
| chr13 | 28675431 | 28864098 | 188668 | 4 | 0 | 6 | 0 | 0.08122616   | 1 | 9  | 0.61140001 | 0.4250187  |
| chr13 | 28864098 | 28893346 | 29249  | 3 | 0 | 6 | 0 | 0.04875589   | 2 | 9  | 0.61140001 | 0.5732208  |
| chr13 | 28893346 | 29002003 | 108658 | 3 | 0 | 6 | 0 | 0.08122616   | 2 | 8  | 0.61140001 | 0.4250187  |
| chr13 | 29002003 | 29067457 | 65455  | 2 | 0 | 5 | 0 | 0.04407651   | 2 | 8  | 0.61140001 | 0.58747015 |
| chr13 | 29067457 | 29121251 | 53795  | 3 | 0 | 6 | 0 | 0.08122616   | 2 | 8  | 0.61140001 | 0.4250187  |
| chr13 | 29121251 | 29238616 | 117366 | 1 | 0 | 5 | 0 | 0.07511598   | 2 | 7  | 0.61140001 | 0.43181735 |
| chr13 | 29238616 | 29238675 | 60     | 1 | 0 | 5 | 0 | 0.04407651   | 3 | 8  | 0.93173516 | 0.58747015 |
| chr13 | 29238675 | 29274755 | 36081  | 2 | 0 | 5 | 0 | 0.07511598   | 1 | 7  | 0.30102999 | 0.43181735 |
| chr13 | 29274755 | 29275350 | 596    | 2 | 0 | 6 | 0 | 0.04875589   | 1 | 9  | 0.30102999 | 0.5732208  |
| chr13 | 29275350 | 29298998 | 23649  | 1 | 0 | 6 | 0 | 0.08122616   | 1 | 8  | 0.30102999 | 0.4250187  |
| chr13 | 29298998 | 29432419 | 133422 | 1 | 0 | 6 | 0 | 0.129913     | 1 | 7  | 0.30102999 | 0.30102999 |
| chr13 | 29432419 | 29432478 | 60     | 1 | 0 | 6 | 0 | 0.129913     | 2 | 7  | 0.61140001 | 0.30102999 |
| chr13 | 29432478 | 29528605 | 96128  | 1 | 0 | 5 | 0 | 0.07511598   | 2 | 7  | 0.61140001 | 0.43181735 |
| chr13 | 29528605 | 29585695 | 57091  | 1 | 0 | 5 | 0 | 0.12309572   | 2 | 6  | 0.61140001 | 0.30102999 |
| chr13 | 29585695 | 29696121 | 110427 | 2 | 0 | 5 | 0 | 0.12309572   | 1 | 6  | 0.30102999 | 0.30102999 |
| chr13 | 29696121 | 29736877 | 40757  | 2 | 0 | 5 | 0 | 0.07511598   | 1 | 7  | 0.30102999 | 0.43181735 |
| chr13 | 29736877 | 29899813 | 162937 | 3 | 0 | 4 | 0 | 0.03812622   | 1 | 7  | 0.30102999 | 0.60763643 |
| chr13 | 29899813 | 29962069 | 62257  | 1 | 0 | 4 | 0 | 0.03812622   | 0 | 7  | 0          | 0.60763643 |
| chr13 | 29962069 | 30002277 | 40209  | 1 | 0 | 3 | 0 | 0.05670724   | 0 | 5  | 0          | 0.45545077 |
| chr13 | 30002277 | 30002336 | 60     | 1 | 0 | 3 | 0 | 0.05670724   | 1 | 5  | 0.30102999 | 0.45545077 |
| chr13 | 30002336 | 30123284 | 120949 | 3 | 0 | 3 | 0 | 0.10122019   | 0 | 4  | 0          | 0.30102999 |
| chr13 | 30123284 | 30166841 | 43558  | 3 | 0 | 4 | 0 | 0.11390336   | 0 | 5  | 0          | 0.30102999 |
| chr13 | 30166841 | 30253448 | 86608  | 1 | 0 | 4 | 0 | 0.18734596   | 0 | 4  | 0          | 0.18734596 |
| chr13 | 30253448 | 30339662 | 86215  | 1 | 0 | 3 | 0 | 0.10122019   | 0 | 4  | 0          | 0.30102999 |
| chr13 | 30339662 | 30517350 | 177689 | 5 | 0 | 0 | 0 | 0.05670724   | 1 | 5  | 0.30102999 | 0.45545077 |
| chr13 | 30517350 | 30768420 | 251071 | 2 | 0 | 3 | 0 | 0.05670724   | 0 | 5  | 0          | 0.45545077 |
| chr13 | 30768420 | 30768479 | 60     | 1 | 0 | 4 | 0 | 0.11390336   | 1 | 5  | 0.30102999 | 0.30102999 |
| chr13 | 30768479 | 30898795 | 130317 | 3 | 0 | 4 | 0 | 0.18734596   | 1 | 4  | 0.30102999 | 0.18734596 |
| chr13 | 30898795 | 31002803 | 104009 | 2 | 0 | 4 | 0 | 0.18734596   | 0 | 4  | 0          | 0.18734596 |
| chr13 | 31002803 | 31035993 | 33191  | 2 | 0 | 5 | 0 | 0.30102999   | 0 | 4  | 0          | 0.11390336 |
| chr13 | 31035993 | 31180366 | 144374 | 3 | 0 | 4 | 0 | 0.30102999   | 0 | 3  | 0          | 0.10122019 |
| chr13 | 31180366 | 31205052 | 24687  | 2 | 0 | 5 | 0 | 0.45545077   | 0 | 4  | 0          | 0.05670724 |
| chr13 | 31205052 | 31232455 | 27404  | 1 | 0 | 3 | 0 | 0.17593012   | 0 | 3  | 0          | 0.17593012 |
| chr13 | 31232455 | 31324494 | 92040  | 2 | 0 | 2 | 0 | 0.08289318   | 0 | 3  | 0          | 0.30102999 |
| chr13 | 31324494 | 31499492 | 174999 | 5 | 0 | 3 | 0 | 0.17593012   | 0 | 3  | 0          | 0.17593012 |
| chr13 | 31499492 | 31711461 | 211970 | 5 | 0 | 3 | 0 | 0.10122019   | 0 | 4  | 0          | 0.30102999 |
| chr13 | 31711461 | 31750367 | 38907  | 3 | 0 | 5 | 0 | 0.30102999   | 0 | 4  | 0          | 0.11390336 |
| chr13 | 31750367 | 31750426 | 60     | 1 | 0 | 5 | 0 | 0.19510895   | 0 | 5  | 0          | 0.19510895 |
| chr13 | 31750426 | 31859866 | 109441 | 3 | 0 | 4 | 0 | 0.18734596   | 0 | 4  | 0          | 0.18734596 |
| chr13 | 31859866 | 31905123 | 45258  | 2 | 0 | 4 | 0 | 0.18734596   | 1 | 4  | 0.30102999 | 0.18734596 |
| chr13 | 31905123 | 31955272 | 50150  | 2 | 0 | 4 | 0 | 0.06713722   | 2 | 6  | 0.61140001 | 0.44141547 |
| chr13 | 31955272 | 32222337 | 267066 | 1 | 0 | 4 | 0 | 0.18734596   | 1 | 4  | 0.30102999 | 0.18734596 |
| chr13 | 32222337 | 32222396 | 60     | 1 | 0 | 5 | 0 | 0.30102999   | 1 | 4  | 0.30102999 | 0.11390336 |
| chr13 | 3222396  | 32339154 | 116759 | 2 | 0 | 4 | 0 | 0.76005302   | 1 | 1  | 0.30102999 | 0.01091641 |
| chr13 | 32339154 | 32339213 | 60     | 1 | 0 | 4 | 0 | 0.18734596   | 1 | 4  | 0.30102999 | 0.18734596 |
| chr13 | 32339213 | 32332681 | 183469 | 5 | 0 | 4 | 0 | 0.30102999   | 1 | 3  | 0.30102999 | 0.10122019 |
| chr13 | 32332681 | 32522740 | 60     | 1 | 0 | 4 | 0 | 0.18734596   | 1 | 4  | 0.30102999 | 0.18734596 |
| chr13 | 32522740 | 32582281 | 59542  | 1 | 0 | 2 | 0 | 0.30102999   | 1 | 1  | 0.30102999 | 0.05404976 |
| chr13 | 32582281 | 32582340 | 60     | 1 | 0 | 2 | 0 | 0.1575501    | 1 | 2  | 0.30102999 | 0.1575501  |
| chr13 | 32582340 | 32634372 | 52033  | 1 | 0 | 2 | 0 | 0.30102999   | 1 | 1  | 0.30102999 | 0.05404976 |
| chr13 | 32634372 | 32761116 | 41745  | 2 | 0 | 4 | 0 | 0.76005302   | 1 | 1  | 0.30102999 | 0.01091641 |
| chr13 | 32761116 | 32761175 | 60     | 1 | 0 | 4 | 0 | 0.18734596   | 1 | 4  | 0.30102999 | 0.18734596 |
| chr13 | 32761175 | 32776058 | 99884  | 2 | 0 | 1 | 0 | 0.05404976   | 1 | 2  | 0.30102999 | 0.30102999 |
| chr13 | 32776058 | 32840633 | 64576  | 2 | 0 | 1 | 0 | 0.05404976   | 2 | 2  | 0.61140001 | 0.30102999 |
| chr13 | 32840633 | 32840692 | 60     | 1 | 0 | 2 | 0 | 0.1575501    | 2 | 2  | 0.61140001 | 0.1575501  |
| chr13 | 32840692 | 32950859 | 110168 | 4 | 0 | 1 | 0 | 0.05404976   | 2 | 2  | 0.61140001 | 0.30102999 |
| chr13 | 32950859 | 33016972 | 66114  | 2 | 0 | 1 | 0 | 0.1218695    | 2 | 1  | 0.61140001 | 0.1218695  |
| chr13 | 33016972 | 33101629 | 84658  | 2 | 0 | 1 | 0 | 0.1218695    | 1 | 1  | 0.30102999 | 0.1218695  |
| chr13 | 33101629 | 33261371 | 159743 | 4 | 0 | 1 | 0 | 0.1218695    | 2 | 1  | 0.61140001 | 0.1218695  |
| chr13 | 33261371 | 33306351 | 44981  | 2 | 0 | 1 | 0 | 0.1218695    | 3 | 1  | 0.93173516 | 0.1218695  |
| chr13 | 33306351 | 33370636 | 64286  | 2 | 0 | 1 | 0 | 0.1218695    | 1 | 1  | 0.30102999 | 0.1218695  |
| chr13 | 33370636 | 33421881 | 51246  | 2 | 0 | 1 | 0 | 0.05404976   | 2 | 2  | 0.30102999 | 0.30102999 |
| chr13 | 33421881 | 33421940 | 60     | 1 | 0 | 1 | 0 | 0.05404976   | 2 | 2  | 0.61140001 | 0.30102999 |
| chr13 | 33421940 | 33491898 | 69959  | 1 | 0 | 1 | 0 | 0.05404976   | 1 | 2  | 0.30102999 | 0.30102999 |
| chr13 | 33491898 | 33678643 | 186746 | 5 | 0 | 2 | 0 | 0.1575501    | 1 | 2  | 0.30102999 | 0.1575501  |
| chr13 | 33678643 | 33963717 | 285075 | 7 | 0 | 1 | 0 | 0.1218695    | 1 | 1  | 0.30102999 | 0.1218695  |
| chr13 | 33963717 | 34102293 | 138577 | 2 | 0 | 1 | 0 | 0.30102999   | 1 | 0  | 0.30102999 | 0          |
| chr13 | 34102293 | 34229520 | 127228 | 2 | 0 | 0 | 0 | 0            | 1 | 0  | 0.30102999 | 0          |
| chr13 | 34229520 | 34328606 | 99087  | 2 | 0 | 1 | 0 | 0.30102999   | 1 | 0  | 0.30102999 | 0          |
| chr13 | 34328606 | 34328665 | 60     | 1 | 0 | 1 | 0 | 0.1218695    | 1 | 1  | 0.30102999 | 0.1218695  |
| chr13 | 34328665 | 34399902 | 71238  | 1 | 0 | 0 | 0 | 0            | 1 | 0  | 0          | 0.30102999 |
| chr13 | 34399902 | 34457353 | 57452  | 2 | 0 | 0 | 0 | 0.05404976   | 0 | 2  | 0          | 0.30102999 |
| chr13 | 34457353 | 34540490 | 83138  | 4 | 0 | 2 | 0 | 0.1575501    | 0 | 2  | 0          | 0.1575501  |
| chr13 | 34540490 | 34637460 | 96971  | 2 | 0 | 3 | 0 | 0.30102999   | 0 | 2  | 0          | 0.08289318 |
| chr13 | 34637460 | 34745723 | 108264 | 1 | 0 | 3 | 0 | 0.51676182   | 0 | 1  | 0          | 0.02438896 |
| chr13 | 34745723 | 34745782 | 60     | 1 | 0 | 5 | 0 | 0.68214471   | 0 | 2  | 0          | 0.02162467 |
| chr13 | 34745782 | 34830086 | 84305  | 1 | 0 | 4 | 0 | 0.47744371   | 0 | 2  | 0          | 0.0429175  |
| chr13 | 34830086 | 34957072 | 126987 | 2 | 0 | 5 | 0 | 0.30102999</ |   |    |            |            |

|       |          |          |        |    |   |    |            |            |   |    |            |            |
|-------|----------|----------|--------|----|---|----|------------|------------|---|----|------------|------------|
| chr13 | 37099237 | 37206831 | 107595 | 1  | 0 | 7  | 0          | 0.08584816 | 0 | 9  | 0          | 0.42015402 |
| chr13 | 37206831 | 37206890 | 60     | 1  | 0 | 8  | 0          | 0.08923391 | 0 | 10 | 0          | 0.4167287  |
| chr13 | 37206890 | 37343189 | 136300 | 3  | 0 | 7  | 0          | 0.05232577 | 0 | 10 | 0          | 0.56314362 |
| chr13 | 37343189 | 37343248 | 60     | 1  | 0 | 9  | 0          | 0.14135546 | 0 | 10 | 0          | 0.30102999 |
| chr13 | 37343248 | 37452823 | 109576 | 4  | 0 | 8  | 0          | 0.13872638 | 0 | 9  | 0          | 0.30102999 |
| chr13 | 37452823 | 38091091 | 638269 | 12 | 0 | 7  | 0          | 0.13499366 | 0 | 8  | 0          | 0.30102999 |
| chr13 | 38091091 | 38331613 | 240523 | 7  | 0 | 8  | 0          | 0.20764654 | 1 | 8  | 0.30102999 | 0.20764654 |
| chr13 | 38331613 | 38331672 | 60     | 1  | 0 | 9  | 0          | 0.20975986 | 1 | 9  | 0.30102999 | 0.20975986 |
| chr13 | 38331672 | 38425350 | 93679  | 2  | 0 | 7  | 0          | 0.13499366 | 0 | 8  | 0.30102999 | 0.30102999 |
| chr13 | 38425350 | 38513759 | 88410  | 2  | 0 | 9  | 0          | 0.20975986 | 1 | 9  | 0.30102999 | 0.20975986 |
| chr13 | 38513759 | 38513818 | 60     | 1  | 0 | 10 | 0          | 0.30102999 | 1 | 9  | 0.30102999 | 0.14135546 |
| chr13 | 38513818 | 38577010 | 63193  | 1  | 0 | 10 | 0          | 0.4167287  | 1 | 8  | 0.30102999 | 0.08923391 |
| chr13 | 38577010 | 38577069 | 60     | 1  | 0 | 11 | 0          | 0.55623409 | 1 | 8  | 0.30102999 | 0.05490675 |
| chr13 | 38577069 | 38627949 | 50881  | 1  | 0 | 10 | 0          | 0.4167287  | 1 | 8  | 0.30102999 | 0.08923391 |
| chr13 | 38627949 | 38722982 | 95034  | 2  | 1 | 10 | 0.1218695  | 0.4167287  | 1 | 8  | 0.1218695  | 0.08923391 |
| chr13 | 38722982 | 38723041 | 60     | 1  | 1 | 11 | 0.1218695  | 0.55623409 | 1 | 8  | 0.1218695  | 0.05490675 |
| chr13 | 38723041 | 38927365 | 204325 | 3  | 0 | 10 | 0          | 0.4167287  | 1 | 8  | 0.30102999 | 0.08923391 |
| chr13 | 38927365 | 39073147 | 145783 | 2  | 0 | 9  | 0          | 0.30102999 | 1 | 8  | 0.30102999 | 0.13872638 |
| chr13 | 39073147 | 39099628 | 26482  | 3  | 0 | 9  | 0          | 0.4167287  | 1 | 8  | 0.30102999 | 0.08923391 |
| chr13 | 39099628 | 39151107 | 51480  | 1  | 0 | 9  | 0          | 0.30102999 | 1 | 8  | 0.30102999 | 0.13872638 |
| chr13 | 39151107 | 39421125 | 270919 | 7  | 0 | 9  | 0          | 0.4167287  | 1 | 8  | 0.30102999 | 0.08923391 |
| chr13 | 39421125 | 39669239 | 248115 | 2  | 0 | 10 | 0          | 0.30102999 | 1 | 8  | 0.30102999 | 0.13872638 |
| chr13 | 39669239 | 39779626 | 110388 | 7  | 0 | 6  | 0          | 0.20064824 | 1 | 6  | 0.30102999 | 0.20064824 |
| chr13 | 39779626 | 39779685 | 60     | 1  | 0 | 10 | 0          | 0.4167287  | 1 | 8  | 0.30102999 | 0.08923391 |
| chr13 | 39779685 | 39915736 | 136052 | 1  | 0 | 9  | 0          | 0.30102999 | 1 | 8  | 0.30102999 | 0.13872638 |
| chr13 | 39915736 | 40015486 | 99751  | 2  | 1 | 8  | 0          | 0.4250187  | 1 | 6  | 0.30102999 | 0.08122616 |
| chr13 | 40015486 | 40061757 | 46272  | 3  | 0 | 8  | 0          | 0.30102999 | 1 | 7  | 0.30102999 | 0.13499366 |
| chr13 | 40061757 | 40061816 | 60     | 1  | 0 | 9  | 0          | 0.30102999 | 1 | 8  | 0.30102999 | 0.13872638 |
| chr13 | 40061816 | 40124661 | 62846  | 2  | 0 | 8  | 0          | 0.30102999 | 1 | 7  | 0.30102999 | 0.13499366 |
| chr13 | 40124661 | 40180664 | 56004  | 2  | 0 | 8  | 0          | 0.20764654 | 1 | 8  | 0.30102999 | 0.20764654 |
| chr13 | 40180664 | 40254170 | 73507  | 1  | 0 | 6  | 0          | 0.20064824 | 1 | 6  | 0.30102999 | 0.20064824 |
| chr13 | 40254170 | 40299035 | 44866  | 1  | 0 | 4  | 0          | 0.11390336 | 1 | 5  | 0.30102999 | 0.30102999 |
| chr13 | 40299035 | 40325869 | 26835  | 2  | 0 | 5  | 0          | 0.19510895 | 1 | 5  | 0.30102999 | 0.19510895 |
| chr13 | 40325869 | 40325928 | 60     | 1  | 0 | 8  | 0          | 0.30102999 | 1 | 7  | 0.30102999 | 0.13499366 |
| chr13 | 40325928 | 40434705 | 108778 | 2  | 0 | 8  | 0          | 0.4250187  | 1 | 6  | 0.30102999 | 0.08122616 |
| chr13 | 40434705 | 40434764 | 60     | 1  | 0 | 9  | 0          | 0.14135546 | 1 | 10 | 0.30102999 | 0.30102999 |
| chr13 | 40434764 | 40545404 | 110641 | 1  | 0 | 7  | 0          | 0.13499366 | 1 | 8  | 0.30102999 | 0.30102999 |
| chr13 | 40545404 | 40773015 | 227612 | 2  | 0 | 7  | 0          | 0.20469099 | 1 | 7  | 0          | 0.20469099 |
| chr13 | 40773015 | 40781219 | 8205   | 2  | 0 | 8  | 0          | 0.13872638 | 0 | 9  | 0          | 0.30102999 |
| chr13 | 40781219 | 40964788 | 183570 | 3  | 0 | 7  | 0          | 0.13499366 | 0 | 8  | 0          | 0.30102999 |
| chr13 | 40964788 | 40997488 | 32701  | 2  | 0 | 8  | 0          | 0.20764654 | 0 | 8  | 0          | 0.20764654 |
| chr13 | 40997488 | 40997547 | 60     | 1  | 0 | 9  | 0          | 0.14135546 | 0 | 10 | 0          | 0.30102999 |
| chr13 | 40997547 | 41076305 | 78759  | 2  | 0 | 8  | 0          | 0.08923391 | 0 | 10 | 0          | 0.4167287  |
| chr13 | 41076305 | 41076364 | 60     | 1  | 0 | 9  | 0          | 0.14135546 | 0 | 10 | 0          | 0.30102999 |
| chr13 | 41076364 | 41185013 | 108650 | 2  | 0 | 7  | 0          | 0.08584816 | 0 | 9  | 0          | 0.42015402 |
| chr13 | 41185013 | 41235944 | 50932  | 3  | 0 | 8  | 0          | 0.13872638 | 0 | 9  | 0          | 0.30102999 |
| chr13 | 41235944 | 41287830 | 51887  | 2  | 0 | 9  | 0          | 0.20975986 | 0 | 9  | 0          | 0.20975986 |
| chr13 | 41287830 | 41287889 | 60     | 1  | 0 | 9  | 0          | 0.14135546 | 0 | 10 | 0          | 0.30102999 |
| chr13 | 41287889 | 41409971 | 122083 | 7  | 0 | 8  | 0          | 0.13872638 | 0 | 9  | 0          | 0.30102999 |
| chr13 | 41409971 | 41446172 | 36202  | 2  | 0 | 9  | 0          | 0.14135546 | 0 | 10 | 0          | 0.30102999 |
| chr13 | 41446172 | 41704941 | 258770 | 9  | 0 | 9  | 0          | 0.09154957 | 0 | 11 | 0          | 0.41444892 |
| chr13 | 41704941 | 41766715 | 61775  | 2  | 0 | 10 | 0          | 0.14303407 | 0 | 11 | 0          | 0.30102999 |
| chr13 | 41766715 | 41832347 | 65633  | 2  | 0 | 9  | 0          | 0.09154957 | 0 | 11 | 0          | 0.41444892 |
| chr13 | 41832347 | 41832406 | 60     | 1  | 0 | 10 | 0          | 0.14303407 | 0 | 11 | 0          | 0.30102999 |
| chr13 | 41832406 | 42172377 | 339972 | 8  | 0 | 9  | 0          | 0.09154957 | 0 | 11 | 0          | 0.41444892 |
| chr13 | 42172377 | 42259283 | 86907  | 3  | 0 | 9  | 0          | 0.0565833  | 0 | 12 | 0          | 0.55190077 |
| chr13 | 42259283 | 42361193 | 101911 | 2  | 0 | 8  | 0          | 0.03209037 | 0 | 12 | 0          | 0.72109894 |
| chr13 | 42361193 | 42480403 | 119211 | 3  | 0 | 8  | 0          | 0.05490675 | 0 | 11 | 0          | 0.55623409 |
| chr13 | 42480403 | 42532854 | 52452  | 2  | 0 | 10 | 0          | 0.14303407 | 0 | 11 | 0          | 0.30102999 |
| chr13 | 42532854 | 42532909 | 56     | 1  | 0 | 10 | 0          | 0.09290028 | 0 | 12 | 0          | 0.41314172 |
| chr13 | 42532909 | 42650178 | 117270 | 2  | 0 | 8  | 0          | 0.05490675 | 0 | 11 | 0          | 0.55623409 |
| chr13 | 42650178 | 42650237 | 60     | 1  | 0 | 8  | 0          | 0.03209037 | 0 | 12 | 0          | 0.72109894 |
| chr13 | 42650237 | 42701677 | 51441  | 4  | 0 | 7  | 0          | 0.01667721 | 0 | 12 | 0          | 0.92532268 |
| chr13 | 42701677 | 42795460 | 93784  | 1  | 0 | 7  | 0          | 0.03037338 | 0 | 11 | 0          | 0.73110763 |
| chr13 | 42795460 | 42834376 | 38917  | 2  | 0 | 7  | 0          | 0.01667721 | 0 | 12 | 0          | 0.92532268 |
| chr13 | 42834376 | 42865682 | 32077  | 2  | 0 | 8  | 0          | 0.03209037 | 0 | 12 | 0          | 0.72109894 |
| chr13 | 42865682 | 42895495 | 38614  | 1  | 0 | 7  | 0          | 0.03037338 | 0 | 11 | 0          | 0.73110763 |
| chr13 | 42895495 | 43117189 | 221695 | 4  | 1 | 7  | 0.30102999 | 0.03037338 | 0 | 11 | 0          | 0.73110763 |
| chr13 | 43117189 | 43117248 | 60     | 1  | 0 | 9  | 0.1218695  | 0.0565833  | 1 | 12 | 0.1218695  | 0.55190077 |
| chr13 | 43117248 | 43474777 | 357530 | 6  | 1 | 9  | 0.1218695  | 0.09154957 | 1 | 11 | 0.1218695  | 0.41444892 |
| chr13 | 43474777 | 43793461 | 318685 | 7  | 1 | 8  | 0.1218695  | 0.08923391 | 1 | 10 | 0.1218695  | 0.4167287  |
| chr13 | 43793461 | 43918723 | 125263 | 3  | 1 | 8  | 0.1218695  | 0.05490675 | 1 | 11 | 0.1218695  | 0.55623409 |
| chr13 | 43918723 | 43987176 | 68454  | 1  | 1 | 8  | 0.1218695  | 0.08923391 | 1 | 10 | 0.1218695  | 0.4167287  |
| chr13 | 43987176 | 44032313 | 45138  | 2  | 1 | 9  | 0.1218695  | 0.14135546 | 1 | 10 | 0.1218695  | 0.30102999 |
| chr13 | 44032313 | 44058221 | 25909  | 1  | 1 | 8  | 0.1218695  | 0.08923391 | 1 | 10 | 0.1218695  | 0.4167287  |
| chr13 | 44058221 | 44092465 | 34245  | 1  | 1 | 7  | 0.1218695  | 0.05232577 | 1 | 10 | 0.1218695  | 0.56314362 |
| chr13 | 44092465 | 44146213 | 53749  | 3  | 1 | 8  | 0.1218695  | 0.08923391 | 1 | 10 | 0.1218695  | 0.4167287  |
| chr13 | 44146213 | 44216392 | 70180  | 1  | 1 | 8  | 0.1218695  | 0.13872638 | 1 | 9  | 0.1218695  | 0.30102999 |
| chr13 | 44216392 | 44311991 | 95600  | 3  | 1 | 8  | 0.1218695  | 0.08923391 | 1 | 10 | 0.1218695  | 0.4167287  |
| chr13 | 44311991 | 44348676 | 36686  | 2  | 1 | 9  | 0.1218695  | 0.14135546 | 1 | 10 | 0.1218695  | 0.30102999 |
| chr13 | 44348676 | 44470120 | 121445 | 6  | 1 | 8  | 0.1218695  | 0.08923391 | 1 | 10 | 0.1218695  | 0.4167287  |
| chr13 | 44470120 | 44717324 | 247205 | 1  | 1 | 7  | 0.1218695  | 0.05232577 | 1 | 10 | 0.1218695  | 0.56314362 |
| chr13 | 44717324 | 44786187 | 68864  | 3  | 1 | 7  | 0.1218695  | 0.03037338 | 1 | 11 | 0.1218695  | 0.73110763 |
| chr13 | 44786187 | 44965230 | 179044 | 3  | 1 | 7  | 0.1218695  | 0.01667721 | 1 | 12 | 0.1218695  | 0.92532268 |
| chr13 | 44965230 | 45163200 | 197971 | 5  | 1 | 7  | 0.30102999 | 0.01667721 | 1 | 12 | 0          | 0.92532268 |
| chr13 | 45163200 | 45223104 | 59905  | 2  | 1 | 6  | 0.30102999 | 0.00778066 | 0 | 12 | 0          | 1.17038931 |
| chr13 | 45223104 | 45238018 | 14915  | 2  | 1 | 6  | 0.30102999 | 0.00373523 | 0 | 13 | 0          | 1.42397267 |
| chr13 | 45238018 | 45294778 | 56761  | 1  | 1 | 6  | 0.30102999 | 0.00778066 | 0 | 12 | 0          | 1.17038931 |
| chr13 | 45294778 | 45440530 | 145753 | 2  | 1 | 7  | 0.30102999 | 0.01667721 | 0 | 12 | 0          | 0.92532268 |
| chr13 | 45440530 | 45440589 | 60     | 1  | 1 | 7  | 0.30102999 | 0.00859896 | 0 | 13 | 0          | 1.14735594 |
| chr13 | 45440589 | 45526609 | 86021  | 1  | 1 | 7  | 0.30102999 | 0.01667721 | 0 | 12 | 0          | 0.92532268 |
| chr13 | 45526609 | 4554780  | 28172  | 2  | 1 | 7  | 0.30102999 | 0.00859896 | 0 | 13 | 0          | 1.14735594 |
| chr13 | 4554780  | 45583346 | 28567  | 2  | 1 | 7  | 0.30102999 | 0.00413023 | 0 | 14 | 0          | 1.39918918 |
| chr13 | 45583346 | 45684357 | 101012 | 1  | 1 | 6  | 0.30102999 | 0.00166733 | 0 | 14 | 0          | 1.70763027 |
| chr13 | 45684357 | 45812718 | 128362 | 4  | 1 | 7  | 0.30102999 | 0.00413023 | 0 | 14 | 0          | 1.39918918 |
| chr13 | 45812718 | 45864385 | 51668  | 2  | 1 | 7  | 0.30102999 | 0.00183109 | 0 | 14 | 0          | 1.68336308 |
| chr13 | 45864385 | 46067665 | 2      |    |   |    |            |            |   |    |            |            |



|       |          |          |        |    |   |   |   |            |   |    |            |            |
|-------|----------|----------|--------|----|---|---|---|------------|---|----|------------|------------|
| chr13 | 48050656 | 48168072 | 117417 | 2  | 0 | 0 | 0 | 0.01518174 | 0 | 11 | 0          | 0.9449689  |
| chr13 | 48168072 | 48168131 | 60     | 1  | 0 | 0 | 0 | 0.03037338 | 0 | 11 | 0          | 0.73110763 |
| chr13 | 48168131 | 48459603 | 291473 | 2  | 0 | 0 | 0 | 0.05232577 | 0 | 10 | 0          | 0.56314362 |
| chr13 | 48459603 | 48516878 | 57276  | 2  | 0 | 0 | 0 | 0.09154957 | 0 | 9  | 0          | 0.41444892 |
| chr13 | 48516878 | 48612916 | 96039  | 3  | 0 | 0 | 0 | 0.05490675 | 0 | 11 | 0          | 0.55623409 |
| chr13 | 48612916 | 48657251 | 44336  | 1  | 0 | 0 | 0 | 0.08923391 | 0 | 10 | 0          | 0.4167287  |
| chr13 | 48657251 | 48657310 | 60     | 1  | 0 | 0 | 0 | 0.21118145 | 0 | 10 | 0          | 0.21118145 |
| chr13 | 48657310 | 48765800 | 108491 | 2  | 0 | 0 | 0 | 0.13872638 | 0 | 9  | 0          | 0.30102999 |
| chr13 | 48765800 | 48809347 | 43548  | 2  | 0 | 0 | 0 | 0.08923391 | 0 | 10 | 0          | 0.4167287  |
| chr13 | 48809347 | 48874253 | 64907  | 4  | 0 | 0 | 0 | 0.14135546 | 0 | 10 | 0          | 0.30102999 |
| chr13 | 48874253 | 48934198 | 59946  | 2  | 0 | 0 | 0 | 0.08923391 | 0 | 10 | 0          | 0.4167287  |
| chr13 | 48934198 | 48950928 | 16731  | 2  | 0 | 0 | 0 | 0.14135546 | 0 | 10 | 0          | 0.30102999 |
| chr13 | 48950928 | 49047270 | 96343  | 3  | 0 | 0 | 0 | 0.08923391 | 0 | 10 | 0          | 0.4167287  |
| chr13 | 49047270 | 49449923 | 402654 | 9  | 0 | 0 | 0 | 0.14135546 | 0 | 10 | 0          | 0.30102999 |
| chr13 | 49449923 | 49449982 | 60     | 1  | 0 | 0 | 0 | 0.09154957 | 0 | 11 | 0          | 0.41444892 |
| chr13 | 49449982 | 49523822 | 73841  | 1  | 0 | 0 | 0 | 0.14135546 | 0 | 9  | 0          | 0.30102999 |
| chr13 | 49523822 | 49523881 | 60     | 1  | 0 | 0 | 0 | 0.09154957 | 0 | 11 | 0          | 0.41444892 |
| chr13 | 49523881 | 49570052 | 46172  | 1  | 0 | 0 | 0 | 0.05490675 | 0 | 11 | 0          | 0.55623409 |
| chr13 | 49570052 | 49614224 | 44173  | 1  | 0 | 0 | 0 | 0.08923391 | 0 | 10 | 0          | 0.4167287  |
| chr13 | 49614224 | 50065622 | 452299 | 13 | 0 | 0 | 0 | 0.08923391 | 1 | 10 | 0.30102999 | 0.4167287  |
| chr13 | 50065622 | 50470181 | 403660 | 11 | 0 | 0 | 0 | 0.13872638 | 1 | 9  | 0.30102999 | 0.30102999 |
| chr13 | 50470181 | 50755506 | 105326 | 2  | 0 | 0 | 0 | 0.08584816 | 1 | 9  | 0.30102999 | 0.42015402 |
| chr13 | 50755506 | 50719232 | 143727 | 9  | 0 | 0 | 0 | 0.13872638 | 9 | 9  | 0.30102999 | 0.30102999 |
| chr13 | 50719232 | 50986864 | 267633 | 6  | 0 | 0 | 0 | 0.14135546 | 1 | 10 | 0.30102999 | 0.30102999 |
| chr13 | 50986864 | 51054987 | 68124  | 1  | 0 | 0 | 0 | 0.05232577 | 1 | 10 | 0.30102999 | 0.56314362 |
| chr13 | 51054987 | 51055046 | 60     | 1  | 0 | 0 | 0 | 0.03037338 | 1 | 11 | 0.30102999 | 0.73110763 |
| chr13 | 51055046 | 51127104 | 72059  | 1  | 0 | 0 | 0 | 0.01518174 | 1 | 11 | 0.30102999 | 0.9449689  |
| chr13 | 51127104 | 51212949 | 85846  | 1  | 0 | 0 | 0 | 0.02793176 | 0 | 10 | 0          | 0.74627054 |
| chr13 | 51212949 | 51278455 | 65507  | 1  | 0 | 0 | 0 | 0.02473314 | 0 | 9  | 0          | 0.76806864 |
| chr13 | 51278455 | 51302875 | 24421  | 2  | 0 | 0 | 0 | 0.04875589 | 1 | 9  | 0.30102999 | 0.57322028 |
| chr13 | 51302875 | 51380238 | 77364  | 2  | 0 | 0 | 0 | 0.07511598 | 1 | 7  | 0.30102999 | 0.43181735 |
| chr13 | 51380238 | 51423054 | 42817  | 2  | 0 | 0 | 0 | 0.08923391 | 1 | 10 | 0.30102999 | 0.4167287  |
| chr13 | 51423054 | 51486874 | 63821  | 1  | 0 | 0 | 0 | 0.05232577 | 1 | 10 | 0.30102999 | 0.56314362 |
| chr13 | 51486874 | 51555973 | 69100  | 2  | 0 | 0 | 0 | 0.02793176 | 1 | 10 | 0.30102999 | 0.74627054 |
| chr13 | 51555973 | 51556032 | 60     | 1  | 0 | 0 | 0 | 0.01667721 | 1 | 12 | 0.30102999 | 0.92532268 |
| chr13 | 51556032 | 51636975 | 80944  | 2  | 0 | 0 | 0 | 0.02473314 | 1 | 9  | 0.30102999 | 0.76806864 |
| chr13 | 51636975 | 51672708 | 35734  | 2  | 0 | 0 | 0 | 0.01320236 | 1 | 10 | 0.30102999 | 0.97390707 |
| chr13 | 51672708 | 51672767 | 60     | 1  | 0 | 0 | 0 | 0.00666883 | 1 | 11 | 0.30102999 | 1.20557689 |
| chr13 | 51672767 | 51825437 | 152671 | 2  | 0 | 0 | 0 | 0.01320236 | 1 | 10 | 0.30102999 | 0.97390707 |
| chr13 | 51825437 | 51989127 | 163691 | 6  | 0 | 0 | 0 | 0.02793176 | 1 | 10 | 0.30102999 | 0.74627054 |
| chr13 | 51989127 | 51989186 | 60     | 1  | 0 | 0 | 0 | 0.01518174 | 1 | 11 | 0.30102999 | 0.9449689  |
| chr13 | 51989186 | 52064599 | 75414  | 2  | 0 | 0 | 0 | 0.02793176 | 1 | 10 | 0.30102999 | 0.74627054 |
| chr13 | 52064599 | 52179616 | 115018 | 3  | 0 | 0 | 0 | 0.03037338 | 1 | 11 | 0.30102999 | 0.73110763 |
| chr13 | 52179616 | 52234770 | 55155  | 2  | 0 | 0 | 0 | 0.03209037 | 1 | 12 | 0.30102999 | 0.72109894 |
| chr13 | 52234770 | 52277798 | 43029  | 1  | 0 | 0 | 0 | 0.05490675 | 1 | 11 | 0.30102999 | 0.55623409 |
| chr13 | 52277798 | 52387903 | 110106 | 3  | 0 | 0 | 0 | 0.13872638 | 1 | 9  | 0.30102999 | 0.30102999 |
| chr13 | 52387903 | 52439703 | 51801  | 3  | 0 | 0 | 0 | 0.03209037 | 1 | 12 | 0.30102999 | 0.72109894 |
| chr13 | 52439703 | 52523841 | 84139  | 1  | 0 | 0 | 0 | 0.05490675 | 1 | 11 | 0.30102999 | 0.55623409 |
| chr13 | 52523841 | 52548513 | 24673  | 1  | 0 | 0 | 0 | 0.03037338 | 1 | 11 | 0.30102999 | 0.73110763 |
| chr13 | 52548513 | 52548572 | 60     | 1  | 0 | 0 | 0 | 0.01667721 | 1 | 12 | 0.30102999 | 0.92532268 |
| chr13 | 52548572 | 52646227 | 97656  | 2  | 0 | 0 | 0 | 0.03037338 | 1 | 11 | 0.30102999 | 0.73110763 |
| chr13 | 52646227 | 52710356 | 64130  | 2  | 0 | 0 | 0 | 0.08584816 | 1 | 9  | 0.30102999 | 0.42015402 |
| chr13 | 52710356 | 52755620 | 45265  | 4  | 0 | 0 | 0 | 0.03037338 | 1 | 11 | 0.30102999 | 0.73110763 |
| chr13 | 52755620 | 52976782 | 221163 | 2  | 0 | 0 | 0 | 0.13499366 | 8 | 8  | 0.30102999 | 0.30102999 |
| chr13 | 52976782 | 52987076 | 10295  | 2  | 0 | 0 | 0 | 0.05232577 | 1 | 10 | 0.30102999 | 0.56314362 |
| chr13 | 52987076 | 53034329 | 47254  | 2  | 0 | 0 | 0 | 0.13499366 | 8 | 8  | 0.30102999 | 0.30102999 |
| chr13 | 53034329 | 53075942 | 41614  | 4  | 0 | 0 | 0 | 0.08584816 | 1 | 9  | 0.30102999 | 0.42015402 |
| chr13 | 53075942 | 53076001 | 60     | 1  | 0 | 0 | 0 | 0.08923391 | 1 | 10 | 0.30102999 | 0.4167287  |
| chr13 | 53076001 | 53262176 | 186176 | 3  | 0 | 0 | 0 | 0.13872638 | 1 | 9  | 0.30102999 | 0.30102999 |
| chr13 | 53262176 | 53380179 | 118004 | 4  | 0 | 0 | 0 | 0.08923391 | 1 | 10 | 0.30102999 | 0.4167287  |
| chr13 | 53380179 | 53419272 | 39094  | 2  | 0 | 0 | 0 | 0.20746554 | 8 | 8  | 0.30102999 | 0.20746554 |
| chr13 | 53419272 | 53419331 | 60     | 1  | 0 | 0 | 0 | 0.08923391 | 1 | 10 | 0.30102999 | 0.4167287  |
| chr13 | 53419331 | 53508228 | 88988  | 2  | 0 | 0 | 0 | 0.20746554 | 8 | 8  | 0.30102999 | 0.20746554 |
| chr13 | 53508228 | 53551359 | 43132  | 1  | 0 | 0 | 0 | 0.30102999 | 7 | 7  | 0.30102999 | 0.13499366 |
| chr13 | 53551359 | 53625881 | 74523  | 1  | 0 | 0 | 0 | 0.20469099 | 1 | 7  | 0.30102999 | 0.20469099 |
| chr13 | 53625881 | 53703487 | 77607  | 1  | 0 | 0 | 0 | 0.129913   | 1 | 7  | 0.30102999 | 0.30102999 |
| chr13 | 53703487 | 53703546 | 60     | 1  | 0 | 0 | 0 | 0.08122616 | 8 | 8  | 0.30102999 | 0.4250187  |
| chr13 | 53703546 | 53941563 | 238018 | 4  | 0 | 0 | 0 | 0.19510895 | 5 | 5  | 0.30102999 | 0.19510895 |
| chr13 | 53941563 | 53941622 | 60     | 1  | 0 | 0 | 0 | 0.20064824 | 1 | 6  | 0.30102999 | 0.20064824 |
| chr13 | 53941622 | 54046536 | 104915 | 1  | 0 | 0 | 0 | 0.30102999 | 4 | 4  | 0          | 0.11390336 |
| chr13 | 54046536 | 54046595 | 60     | 1  | 0 | 0 | 0 | 0.19510895 | 5 | 5  | 0          | 0.19510895 |
| chr13 | 54046595 | 54306014 | 259420 | 1  | 0 | 0 | 0 | 0.45545077 | 3 | 3  | 0          | 0.05670724 |
| chr13 | 54306014 | 54306073 | 60     | 1  | 0 | 0 | 0 | 0.12309572 | 1 | 6  | 0.30102999 | 0.30102999 |
| chr13 | 54306073 | 54416772 | 110700 | 1  | 0 | 0 | 0 | 0.30102999 | 0 | 3  | 0          | 0.10122019 |
| chr13 | 54416772 | 54627609 | 210838 | 2  | 0 | 0 | 0 | 0.30102999 | 0 | 2  | 0          | 0.08289318 |
| chr13 | 54627609 | 54757634 | 130026 | 2  | 0 | 0 | 0 | 0.44141547 | 4 | 4  | 0          | 0.06713722 |
| chr13 | 54757634 | 54757693 | 60     | 1  | 0 | 0 | 0 | 0.30102999 | 5 | 5  | 0          | 0.12309572 |
| chr13 | 54757693 | 54877857 | 210165 | 1  | 0 | 0 | 0 | 0.30102999 | 0 | 1  | 0          | 0.05404976 |
| chr13 | 54877857 | 55096463 | 218607 | 5  | 0 | 0 | 0 | 0.1575501  | 2 | 2  | 0          | 0.1575501  |
| chr13 | 55096463 | 55215189 | 118727 | 2  | 0 | 0 | 0 | 0.30102999 | 0 | 2  | 0          | 0.08289318 |
| chr13 | 55215189 | 55358698 | 143510 | 1  | 0 | 0 | 0 | 0.1575501  | 2 | 2  | 0          | 0.1575501  |
| chr13 | 55358698 | 5543378  | 184681 | 2  | 0 | 0 | 0 | 0.30102999 | 0 | 2  | 0          | 0.08289318 |
| chr13 | 5543378  | 55978984 | 435607 | 3  | 0 | 0 | 0 | 0.1575501  | 2 | 0  | 0          | 0.1575501  |
| chr13 | 55978984 | 55979043 | 60     | 1  | 0 | 0 | 0 | 0.18734596 | 0 | 4  | 0          | 0.18734596 |
| chr13 | 55979043 | 56137534 | 158492 | 1  | 0 | 0 | 0 | 0.10122019 | 0 | 4  | 0          | 0.30102999 |
| chr13 | 56137534 | 56137593 | 60     | 1  | 0 | 0 | 0 | 0.30102999 | 1 | 4  | 0.30102999 | 0.11390336 |
| chr13 | 56137593 | 56258661 | 121069 | 1  | 0 | 0 | 0 | 0.18734596 | 1 | 4  | 0.30102999 | 0.18734596 |
| chr13 | 56258661 | 56258720 | 60     | 1  | 0 | 0 | 0 | 0.30102999 | 5 | 5  | 0.30102999 | 0.12309572 |
| chr13 | 56258720 | 56744524 | 485805 | 3  | 0 | 0 | 0 | 0.30102999 | 4 | 4  | 0.30102999 | 0.11390336 |
| chr13 | 56744524 | 56744583 | 60     | 1  | 0 | 0 | 0 | 0.58747015 | 1 | 5  | 0.30102999 | 0.04407651 |
| chr13 | 56744583 | 56880053 | 135471 | 2  | 0 | 0 | 0 | 0.30102999 | 1 | 5  | 0.30102999 | 0.12309572 |
| chr13 | 56880053 | 57093102 | 213050 | 3  | 0 | 0 | 0 | 0.30102999 | 1 | 6  | 0.30102999 | 0.129913   |
| chr13 | 57093102 | 57454474 | 361173 | 3  | 0 | 0 | 0 | 0.12309572 | 6 | 6  | 0          | 0.30102999 |
| chr13 | 57454474 | 57587473 | 133000 | 3  | 0 | 0 | 0 | 0.30102999 | 0 | 6  | 0          | 0.129913   |
| chr13 | 57587473 | 57587532 | 60     | 1  | 0 | 0 | 0 | 0.30102999 | 7 | 7  | 0          | 0.13499366 |
| chr13 | 57587532 | 57748283 | 160752 | 2  | 0 | 0 | 0 | 0.20469099 | 0 | 7  | 0          | 0.20469099 |
| chr13 | 57748283 | 57779596 | 31314  | 2  | 0 | 0 | 0 | 0.13499366 | 8 | 8  | 0          | 0.30102999 |
| chr13 | 57779596 | 57872556 | 92961  | 1  | 0 | 0 | 0 | 0.08122616 | 8 | 8  | 0          | 0.425018   |

|       |          |          |        |    |   |    |            |            |   |    |            |            |
|-------|----------|----------|--------|----|---|----|------------|------------|---|----|------------|------------|
| chr13 | 60535713 | 60535772 | 60     | 1  | 0 | 5  | 0          | 0.12309572 | 0 | 6  | 0          | 0.30102999 |
| chr13 | 60535772 | 60589420 | 53649  | 1  | 0 | 4  | 0          | 0.06713722 | 0 | 6  | 0          | 0.44141547 |
| chr13 | 60589420 | 60867629 | 278210 | 7  | 0 | 5  | 0          | 0.12309572 | 0 | 6  | 0          | 0.30102999 |
| chr13 | 60867629 | 61102644 | 235016 | 5  | 0 | 5  | 0          | 0.19510895 | 0 | 5  | 0          | 0.19510895 |
| chr13 | 61102644 | 61137836 | 35193  | 2  | 0 | 5  | 0          | 0.12309572 | 0 | 6  | 0          | 0.30102999 |
| chr13 | 61137836 | 61224194 | 86359  | 4  | 0 | 6  | 0          | 0.20064824 | 0 | 6  | 0          | 0.20064824 |
| chr13 | 61224194 | 61224253 | 60     | 1  | 0 | 6  | 0          | 0.20064824 | 1 | 6  | 0.30102999 | 0.20064824 |
| chr13 | 61224253 | 61307388 | 83136  | 1  | 0 | 6  | 0          | 0.30102999 | 1 | 5  | 0.30102999 | 0.12309572 |
| chr13 | 61307388 | 61358750 | 51363  | 1  | 0 | 6  | 0          | 0.44141547 | 1 | 4  | 0.30102999 | 0.06713722 |
| chr13 | 61358750 | 61519993 | 161244 | 2  | 0 | 4  | 0          | 0.18734596 | 0 | 4  | 0          | 0.18734596 |
| chr13 | 61519993 | 61520052 | 60     | 1  | 0 | 5  | 0          | 0.30102999 | 0 | 4  | 0          | 0.11390336 |
| chr13 | 61520052 | 61671582 | 151531 | 1  | 0 | 5  | 0          | 0.45545077 | 0 | 3  | 0          | 0.05670724 |
| chr13 | 61671582 | 61770319 | 98738  | 2  | 0 | 6  | 0          | 0.63695542 | 0 | 3  | 0          | 0.03070643 |
| chr13 | 61770319 | 61770378 | 60     | 1  | 0 | 6  | 0          | 0.63695542 | 1 | 3  | 0.30102999 | 0.03070643 |
| chr13 | 61770378 | 61983928 | 213551 | 2  | 0 | 5  | 0          | 0.45545077 | 0 | 3  | 0          | 0.05670724 |
| chr13 | 61983928 | 62089740 | 105813 | 3  | 0 | 5  | 0          | 0.30102999 | 0 | 4  | 0          | 0.11390336 |
| chr13 | 62089740 | 62603614 | 513875 | 6  | 0 | 5  | 0          | 0.45545077 | 0 | 3  | 0          | 0.05670724 |
| chr13 | 62603614 | 62673141 | 69528  | 1  | 0 | 5  | 0          | 0.68214471 | 0 | 2  | 0          | 0.02162467 |
| chr13 | 62673141 | 62962420 | 289280 | 3  | 0 | 3  | 0          | 0.30102999 | 0 | 2  | 0          | 0.08289318 |
| chr13 | 62962420 | 63482463 | 520044 | 4  | 0 | 3  | 0          | 0.10122019 | 0 | 4  | 0          | 0.30102999 |
| chr13 | 63482463 | 63482522 | 60     | 1  | 0 | 6  | 0          | 0.20064824 | 0 | 6  | 0          | 0.20064824 |
| chr13 | 63482522 | 63649641 | 167120 | 1  | 0 | 5  | 0          | 0.19510895 | 0 | 5  | 0          | 0.19510895 |
| chr13 | 63649641 | 63649700 | 60     | 1  | 0 | 5  | 0          | 0.12309572 | 0 | 6  | 0          | 0.30102999 |
| chr13 | 63649700 | 63813301 | 163602 | 2  | 0 | 4  | 0          | 0.11390336 | 0 | 5  | 0          | 0.30102999 |
| chr13 | 63813301 | 63813360 | 60     | 1  | 0 | 4  | 0          | 0.07511598 | 0 | 7  | 0          | 0.43181735 |
| chr13 | 63813360 | 64084290 | 270931 | 2  | 0 | 4  | 0          | 0.18734596 | 0 | 4  | 0          | 0.18734596 |
| chr13 | 64084290 | 64084349 | 60     | 1  | 0 | 7  | 0          | 0.60763643 | 0 | 4  | 0          | 0.03812622 |
| chr13 | 64084349 | 64189703 | 105355 | 1  | 0 | 3  | 0          | 0.10122019 | 0 | 4  | 0          | 0.30102999 |
| chr13 | 64189703 | 64504041 | 314339 | 7  | 0 | 2  | 0          | 0.0429175  | 0 | 4  | 0          | 0.47744371 |
| chr13 | 64504041 | 64570562 | 66522  | 2  | 0 | 3  | 0          | 0.10122019 | 0 | 4  | 0          | 0.30102999 |
| chr13 | 64570562 | 64949341 | 378780 | 3  | 0 | 4  | 0          | 0.06713722 | 0 | 6  | 0          | 0.44141547 |
| chr13 | 64949341 | 64949400 | 60     | 1  | 0 | 6  | 0          | 0.20064824 | 0 | 6  | 0          | 0.20064824 |
| chr13 | 64949400 | 65117216 | 167817 | 1  | 0 | 4  | 0          | 0.11390336 | 0 | 5  | 0          | 0.30102999 |
| chr13 | 65117216 | 65418459 | 301244 | 2  | 0 | 4  | 0          | 0.18734596 | 0 | 4  | 0          | 0.18734596 |
| chr13 | 65418459 | 65615467 | 197009 | 3  | 0 | 3  | 0          | 0.17593012 | 0 | 3  | 0          | 0.17593012 |
| chr13 | 65615467 | 65615526 | 60     | 1  | 0 | 3  | 0          | 0.10122019 | 0 | 4  | 0          | 0.30102999 |
| chr13 | 65615526 | 65971853 | 356328 | 3  | 0 | 3  | 0          | 0.17593012 | 0 | 3  | 0          | 0.17593012 |
| chr13 | 65971853 | 66198235 | 226383 | 2  | 0 | 6  | 0          | 0.03070643 | 0 | 6  | 0          | 0.63695542 |
| chr13 | 66198235 | 66198294 | 60     | 1  | 0 | 9  | 0          | 0.14135546 | 0 | 10 | 0          | 0.30102999 |
| chr13 | 66198294 | 66626710 | 428417 | 4  | 0 | 9  | 0          | 0.20975986 | 0 | 9  | 0          | 0.20975986 |
| chr13 | 66626710 | 66725999 | 99290  | 2  | 0 | 10 | 0          | 0.21118145 | 2 | 10 | 0.61140001 | 0.21118145 |
| chr13 | 66725999 | 66838891 | 112893 | 2  | 0 | 11 | 0          | 0.30102999 | 2 | 10 | 0.61140001 | 0.14303407 |
| chr13 | 66838891 | 66838950 | 60     | 1  | 0 | 11 | 0          | 0.21200206 | 2 | 11 | 0.61140001 | 0.21200206 |
| chr13 | 66838950 | 67341918 | 502969 | 15 | 0 | 11 | 0          | 0.21200206 | 1 | 11 | 0.30102999 | 0.21200206 |
| chr13 | 67341918 | 67446045 | 104128 | 2  | 0 | 10 | 0          | 0.14303407 | 1 | 11 | 0.30102999 | 0.30102999 |
| chr13 | 67446045 | 67733060 | 287016 | 7  | 0 | 9  | 0          | 0.14135546 | 0 | 10 | 0.30102999 | 0.30102999 |
| chr13 | 67733060 | 67804261 | 71202  | 2  | 0 | 9  | 0          | 0.09154957 | 1 | 11 | 0.30102999 | 0.41444892 |
| chr13 | 67804261 | 67939506 | 135246 | 2  | 0 | 8  | 0          | 0.08923391 | 1 | 10 | 0.30102999 | 0.41672787 |
| chr13 | 67939506 | 67939565 | 60     | 1  | 0 | 9  | 0          | 0.14135546 | 1 | 10 | 0.30102999 | 0.30102999 |
| chr13 | 67939565 | 68103781 | 164217 | 1  | 0 | 7  | 0          | 0.13499366 | 1 | 8  | 0.30102999 | 0.30102999 |
| chr13 | 68103781 | 68204874 | 101094 | 1  | 0 | 6  | 0          | 0.129913   | 1 | 7  | 0.30102999 | 0.30102999 |
| chr13 | 68204874 | 68377785 | 172912 | 1  | 0 | 5  | 0          | 0.07511598 | 1 | 7  | 0.30102999 | 0.43181735 |
| chr13 | 68377785 | 68377844 | 60     | 1  | 0 | 6  | 0          | 0.08122616 | 1 | 8  | 0.30102999 | 0.4250187  |
| chr13 | 68377844 | 68513369 | 135526 | 2  | 0 | 6  | 0          | 0.12309572 | 1 | 6  | 0.30102999 | 0.30102999 |
| chr13 | 68513369 | 68708794 | 195426 | 1  | 0 | 4  | 0          | 0.30102999 | 1 | 3  | 0.30102999 | 0.10122019 |
| chr13 | 68708794 | 68708853 | 60     | 1  | 0 | 5  | 0          | 0.45545077 | 1 | 3  | 0.30102999 | 0.05670724 |
| chr13 | 68708853 | 68864169 | 155317 | 1  | 0 | 5  | 0          | 0.68214471 | 1 | 2  | 0.30102999 | 0.02162467 |
| chr13 | 68864169 | 68903405 | 39237  | 2  | 0 | 3  | 0          | 0.45545077 | 1 | 3  | 0.30102999 | 0.05670724 |
| chr13 | 68903405 | 69124880 | 221476 | 1  | 0 | 4  | 0          | 0.30102999 | 0 | 3  | 0          | 0.10122019 |
| chr13 | 69124880 | 69124939 | 60     | 1  | 0 | 5  | 0          | 0.30102999 | 0 | 4  | 0          | 0.11390336 |
| chr13 | 69124939 | 69303986 | 179048 | 3  | 0 | 4  | 0          | 0.47744371 | 0 | 2  | 0          | 0.0429175  |
| chr13 | 69303986 | 69304045 | 60     | 1  | 0 | 5  | 0          | 0.30102999 | 0 | 4  | 0          | 0.11390336 |
| chr13 | 69304045 | 69444524 | 140480 | 1  | 0 | 4  | 0          | 0.18734596 | 0 | 4  | 0          | 0.18734596 |
| chr13 | 69444524 | 69444583 | 60     | 1  | 0 | 4  | 0          | 0.12309572 | 1 | 6  | 0.30102999 | 0.30102999 |
| chr13 | 69444583 | 69562597 | 120715 | 1  | 0 | 3  | 0          | 0.03070643 | 0 | 6  | 0          | 0.63695542 |
| chr13 | 69562597 | 69666001 | 100705 | 2  | 0 | 8  | 0          | 0.00739514 | 0 | 8  | 0          | 0.07548421 |
| chr13 | 69666001 | 69893937 | 317937 | 4  | 0 | 5  | 0          | 0.04407651 | 0 | 9  | 0          | 0.58747015 |
| chr13 | 69893937 | 70122318 | 138382 | 2  | 0 | 5  | 0          | 0.02473314 | 0 | 9  | 0          | 0.76806864 |
| chr13 | 70122318 | 70259652 | 137335 | 1  | 0 | 5  | 0          | 0.07511598 | 0 | 7  | 0          | 0.43181735 |
| chr13 | 70259652 | 70345271 | 85620  | 3  | 0 | 7  | 0          | 0.20469099 | 0 | 7  | 0          | 0.20469099 |
| chr13 | 70345271 | 70421499 | 76229  | 3  | 0 | 7  | 0          | 0.13499366 | 0 | 8  | 0          | 0.30102999 |
| chr13 | 70421499 | 70486055 | 64557  | 2  | 0 | 6  | 0          | 0.08122616 | 0 | 8  | 0          | 0.4250187  |
| chr13 | 70486055 | 70653237 | 167183 | 4  | 0 | 5  | 0          | 0.04407651 | 0 | 8  | 0          | 0.58747015 |
| chr13 | 70653237 | 70703916 | 50680  | 1  | 0 | 4  | 0          | 0.02074938 | 0 | 8  | 0          | 0.79906872 |
| chr13 | 70703916 | 70872350 | 168435 | 2  | 0 | 4  | 0          | 0.01077081 | 0 | 9  | 0          | 1.01542894 |
| chr13 | 70872350 | 71028436 | 156087 | 2  | 0 | 5  | 0          | 0.02473314 | 0 | 9  | 0          | 0.76806864 |
| chr13 | 71028436 | 71028495 | 60     | 1  | 0 | 6  | 0          | 0.04875589 | 0 | 9  | 0          | 0.5732208  |
| chr13 | 71028495 | 71062542 | 34048  | 1  | 0 | 5  | 0          | 0.02473314 | 0 | 8  | 0          | 0.76806864 |
| chr13 | 71062542 | 71062601 | 60     | 1  | 0 | 6  | 0          | 0.04875589 | 0 | 9  | 0          | 0.5732208  |
| chr13 | 71062601 | 71196665 | 134065 | 1  | 0 | 6  | 0          | 0.08122616 | 0 | 8  | 0          | 0.4250187  |
| chr13 | 71196665 | 71196724 | 60     | 1  | 0 | 7  | 0          | 0.13499366 | 0 | 8  | 0          | 0.30102999 |
| chr13 | 71196724 | 71324058 | 127335 | 1  | 0 | 6  | 0          | 0.08122616 | 0 | 8  | 0          | 0.4250187  |
| chr13 | 71324058 | 71324117 | 60     | 1  | 0 | 6  | 0          | 0.04875589 | 0 | 9  | 0          | 0.5732208  |
| chr13 | 71324117 | 71441946 | 117830 | 1  | 0 | 6  | 0          | 0.08122616 | 0 | 8  | 0          | 0.4250187  |
| chr13 | 71441946 | 71442005 | 60     | 1  | 0 | 7  | 0          | 0.08584816 | 0 | 9  | 0          | 0.42015402 |
| chr13 | 71442005 | 71515304 | 73300  | 1  | 0 | 6  | 0          | 0.04875589 | 0 | 9  | 0          | 0.5732208  |
| chr13 | 71515304 | 71618566 | 103263 | 1  | 0 | 6  | 0          | 0.129913   | 0 | 7  | 0          | 0.30102999 |
| chr13 | 71618566 | 71799163 | 180598 | 3  | 0 | 6  | 0          | 0.129913   | 1 | 7  | 0.30102999 | 0.30102999 |
| chr13 | 71799163 | 71799222 | 60     | 1  | 1 | 6  | 0.05404976 | 0.08122616 | 2 | 8  | 0.30102999 | 0.4250187  |
| chr13 | 71799222 | 71874765 | 75544  | 1  | 1 | 5  | 0.05404976 | 0.04407651 | 2 | 8  | 0.30102999 | 0.58747015 |
| chr13 | 71874765 | 71933242 | 58478  | 2  | 1 | 5  | 0.05404976 | 0.02473314 | 2 | 9  | 0.30102999 | 0.76806864 |
| chr13 | 71933242 | 72151784 | 218543 | 5  | 0 | 5  | 0          | 0.02473314 | 2 | 9  | 0.61140001 | 0.76806864 |
| chr13 | 72151784 | 72252458 | 100675 | 2  | 0 | 5  | 0          | 0.07511598 | 2 | 7  | 0.61140001 | 0.43181735 |
| chr13 | 72252458 | 72303175 | 50718  | 2  | 0 | 5  | 0          | 0.04407651 | 2 | 8  | 0.61140001 | 0.58747015 |
| chr13 | 72303175 | 72303234 | 60     | 1  | 0 | 5  | 0          | 0.1320236  | 2 | 10 | 0.61140001 | 0.97390707 |
| chr13 | 72303234 | 72334045 | 30812  | 1  | 0 | 5  | 0          | 0.02473314 | 2 | 9  | 0.61140001 | 0.76806864 |
| chr13 | 72334045 | 72366855 | 32811  | 2  | 0 | 6  | 0          | 0.04875589 | 2 | 9  | 0.61140001 | 0.5732208  |
| chr13 | 72366855 | 72366914 | 60     | 1  | 0 | 7  | 0          | 0.08584816 | 2 | 9  | 0.61140001 | 0.42015402 |
| chr13 | 72366914 | 72450126 | 83213  | 2  | 0 | 6  | 0          | 0.04875589 | 2 | 9  | 0.61140001 | 0.5732208  |
| chr13 | 72450126 | 72450185 | 60     | 1  | 0 |    |            |            |   |    |            |            |

|       |          |          |        |   |   |    |   |            |   |    |            |            |
|-------|----------|----------|--------|---|---|----|---|------------|---|----|------------|------------|
| chr13 | 74339017 | 74339076 | 60     | 1 | 0 | 7  | 0 | 0.13499366 | 2 | 8  | 0.6114001  | 0.3010299  |
| chr13 | 74339076 | 74430719 | 91644  | 2 | 0 | 7  | 0 | 0.20469099 | 2 | 7  | 0.6114001  | 0.20469099 |
| chr13 | 74430719 | 74430778 | 60     | 1 | 0 | 7  | 0 | 0.13499366 | 2 | 8  | 0.6114001  | 0.3010299  |
| chr13 | 74430778 | 74518169 | 87392  | 3 | 0 | 7  | 0 | 0.20469099 | 2 | 7  | 0.6114001  | 0.20469099 |
| chr13 | 74518169 | 74518228 | 60     | 1 | 0 | 7  | 0 | 0.13499366 | 2 | 8  | 0.6114001  | 0.3010299  |
| chr13 | 74518228 | 74579079 | 60852  | 1 | 0 | 6  | 0 | 0.08122616 | 2 | 8  | 0.6114001  | 0.4250187  |
| chr13 | 74579079 | 74610302 | 31224  | 2 | 0 | 6  | 0 | 0.04875589 | 2 | 9  | 0.6114001  | 0.5732208  |
| chr13 | 74610302 | 74610361 | 60     | 1 | 0 | 7  | 0 | 0.05232577 | 2 | 10 | 0.6114001  | 0.56314362 |
| chr13 | 74610361 | 74658923 | 48563  | 1 | 0 | 6  | 0 | 0.02793176 | 2 | 10 | 0.6114001  | 0.74627054 |
| chr13 | 74658923 | 74704254 | 45332  | 1 | 0 | 5  | 0 | 0.01320236 | 2 | 10 | 0.6114001  | 0.97390707 |
| chr13 | 74704254 | 74740763 | 36510  | 2 | 0 | 7  | 0 | 0.05232577 | 2 | 10 | 0.6114001  | 0.56314362 |
| chr13 | 74740763 | 74920347 | 179585 | 1 | 0 | 7  | 0 | 0.08584816 | 2 | 9  | 0.6114001  | 0.42015402 |
| chr13 | 74920347 | 74998017 | 77671  | 2 | 0 | 5  | 0 | 0.04407651 | 2 | 8  | 0.6114001  | 0.58747015 |
| chr13 | 74998017 | 75053622 | 55606  | 1 | 0 | 4  | 0 | 0.02074938 | 2 | 8  | 0.6114001  | 0.79906872 |
| chr13 | 75053622 | 75178898 | 125277 | 2 | 0 | 4  | 0 | 0.01077081 | 2 | 9  | 0.6114001  | 1.01542894 |
| chr13 | 75178898 | 75344304 | 165407 | 2 | 0 | 7  | 0 | 0.08584816 | 2 | 9  | 0.6114001  | 0.42015402 |
| chr13 | 75344304 | 75344363 | 60     | 1 | 0 | 9  | 0 | 0.14135546 | 2 | 10 | 0.6114001  | 0.3010299  |
| chr13 | 75344363 | 75462743 | 118381 | 1 | 0 | 6  | 0 | 0.02793176 | 2 | 10 | 0.6114001  | 0.74627054 |
| chr13 | 75462743 | 75600004 | 137262 | 2 | 0 | 6  | 0 | 0.01518174 | 2 | 11 | 0.6114001  | 0.9449689  |
| chr13 | 75600004 | 75826612 | 226609 | 3 | 0 | 3  | 0 | 0.00378107 | 2 | 9  | 0.6114001  | 1.33111237 |
| chr13 | 75826612 | 75888225 | 61614  | 1 | 0 | 3  | 0 | 0.00796414 | 2 | 8  | 0.6114001  | 1.07584421 |
| chr13 | 75888225 | 76194931 | 306707 | 7 | 0 | 3  | 0 | 0.03070643 | 2 | 6  | 0.6114001  | 0.63695542 |
| chr13 | 76194931 | 76195363 | 433    | 3 | 0 | 3  | 0 | 0.01598258 | 2 | 7  | 0.6114001  | 0.84395715 |
| chr13 | 76195363 | 76287311 | 91949  | 2 | 0 | 3  | 0 | 0.01598258 | 2 | 7  | 0.3010299  | 0.84395715 |
| chr13 | 76287311 | 76500962 | 213652 | 6 | 0 | 3  | 0 | 0.01598258 | 2 | 7  | 0.6114001  | 0.84395715 |
| chr13 | 76500962 | 76681102 | 180141 | 2 | 0 | 3  | 0 | 0.00378107 | 2 | 9  | 0.6114001  | 1.33111237 |
| chr13 | 76681102 | 76736647 | 55546  | 2 | 0 | 4  | 0 | 0.01077081 | 2 | 9  | 0.6114001  | 1.01542894 |
| chr13 | 76736647 | 76844352 | 107706 | 2 | 0 | 5  | 0 | 0.02473314 | 2 | 9  | 0.6114001  | 0.76806864 |
| chr13 | 76844352 | 76864411 | 20060  | 2 | 0 | 5  | 0 | 0.00666883 | 2 | 11 | 0.6114001  | 1.20557689 |
| chr13 | 76864411 | 77047576 | 183166 | 2 | 0 | 4  | 0 | 0.00530919 | 2 | 10 | 0.6114001  | 1.2568129  |
| chr13 | 77047576 | 77047635 | 60     | 1 | 0 | 5  | 0 | 0.00666883 | 2 | 11 | 0.6114001  | 1.20557689 |
| chr13 | 77047635 | 77387021 | 339387 | 2 | 0 | 4  | 0 | 0.01077081 | 2 | 9  | 0.6114001  | 1.01542894 |
| chr13 | 77387021 | 77387080 | 60     | 1 | 0 | 7  | 0 | 0.03037338 | 2 | 11 | 0.6114001  | 0.73110763 |
| chr13 | 77387080 | 77458080 | 71001  | 1 | 0 | 6  | 0 | 0.01518174 | 2 | 11 | 0.6114001  | 0.9449689  |
| chr13 | 77458080 | 77458808 | 729    | 2 | 0 | 8  | 0 | 0.05490675 | 2 | 11 | 0.6114001  | 0.55623409 |
| chr13 | 77458808 | 77619417 | 160610 | 5 | 0 | 6  | 0 | 0.01518174 | 2 | 11 | 0.6114001  | 0.9449689  |
| chr13 | 77619417 | 77692582 | 73166  | 2 | 0 | 6  | 0 | 0.01518174 | 1 | 11 | 0.3010299  | 0.9449689  |
| chr13 | 77692582 | 77692630 | 49     | 1 | 0 | 8  | 0 | 0.05490675 | 2 | 11 | 0.6114001  | 0.55623409 |
| chr13 | 77692630 | 77718617 | 25988  | 1 | 0 | 6  | 0 | 0.01518174 | 2 | 11 | 0.6114001  | 0.9449689  |
| chr13 | 77718617 | 77812881 | 94265  | 3 | 0 | 4  | 0 | 0.00530919 | 2 | 10 | 0.6114001  | 1.2568129  |
| chr13 | 77812881 | 77896921 | 84041  | 3 | 0 | 11 | 0 | 0.30102999 | 2 | 10 | 0.6114001  | 0.14303407 |
| chr13 | 77896921 | 77896980 | 60     | 1 | 0 | 14 | 0 | 0.71353304 | 2 | 10 | 0.6114001  | 0.03344703 |
| chr13 | 77896980 | 78036006 | 139027 | 1 | 0 | 13 | 0 | 0.5498098  | 2 | 10 | 0.6114001  | 0.0574087  |
| chr13 | 78036006 | 78176426 | 140421 | 5 | 0 | 13 | 0 | 0.30102999 | 2 | 12 | 0.6114001  | 0.14385241 |
| chr13 | 78176426 | 78176485 | 60     | 1 | 0 | 14 | 0 | 0.41314172 | 2 | 12 | 0.6114001  | 0.09290028 |
| chr13 | 78176485 | 78265717 | 89233  | 2 | 0 | 12 | 0 | 0.21227046 | 2 | 12 | 0.6114001  | 0.21227046 |
| chr13 | 78265717 | 78265776 | 60     | 1 | 0 | 15 | 0 | 0.41444882 | 2 | 13 | 0.6114001  | 0.09154957 |
| chr13 | 78265776 | 78315441 | 49666  | 2 | 0 | 13 | 0 | 0.30102999 | 2 | 12 | 0.6114001  | 0.14385241 |
| chr13 | 78315441 | 78320719 | 5279   | 2 | 0 | 15 | 0 | 0.55190077 | 2 | 12 | 0.6114001  | 0.0565833  |
| chr13 | 78320719 | 78532996 | 212278 | 4 | 0 | 14 | 0 | 0.41314172 | 2 | 12 | 0.6114001  | 0.09290028 |
| chr13 | 78532996 | 78560311 | 27316  | 2 | 0 | 14 | 0 | 0.30102999 | 2 | 13 | 0.6114001  | 0.14303407 |
| chr13 | 78560311 | 78658642 | 98332  | 2 | 0 | 13 | 0 | 0.21200206 | 2 | 13 | 0.6114001  | 0.21200206 |
| chr13 | 78658642 | 78706473 | 47832  | 1 | 0 | 12 | 0 | 0.14385241 | 2 | 13 | 0.6114001  | 0.30102999 |
| chr13 | 78706473 | 78795113 | 88641  | 2 | 0 | 10 | 0 | 0.0574087  | 2 | 13 | 0.6114001  | 0.5498098  |
| chr13 | 78795113 | 78855401 | 60289  | 1 | 0 | 7  | 0 | 0.01667271 | 2 | 12 | 0.6114001  | 0.92532268 |
| chr13 | 78855401 | 78974868 | 119468 | 2 | 0 | 7  | 0 | 0.03037338 | 2 | 11 | 0.6114001  | 0.73110763 |
| chr13 | 78974868 | 78974927 | 60     | 1 | 0 | 10 | 0 | 0.0574087  | 2 | 13 | 0.6114001  | 0.5498098  |
| chr13 | 78974927 | 79023662 | 48736  | 1 | 0 | 9  | 0 | 0.03310993 | 2 | 13 | 0.6114001  | 0.71538971 |
| chr13 | 79023662 | 79076153 | 52492  | 1 | 0 | 8  | 0 | 0.05490675 | 2 | 11 | 0.6114001  | 0.55623409 |
| chr13 | 79076153 | 79076212 | 60     | 1 | 0 | 9  | 0 | 0.09154957 | 2 | 11 | 0.6114001  | 0.41444882 |
| chr13 | 79076212 | 79141903 | 65692  | 1 | 0 | 8  | 0 | 0.05490675 | 2 | 11 | 0.6114001  | 0.55623409 |
| chr13 | 79141903 | 79174088 | 32186  | 2 | 0 | 9  | 0 | 0.0556833  | 2 | 12 | 0.6114001  | 0.55190077 |
| chr13 | 79174088 | 79188609 | 14522  | 1 | 0 | 7  | 0 | 0.05232577 | 2 | 10 | 0.6114001  | 0.56314362 |
| chr13 | 79188609 | 79303696 | 115088 | 2 | 0 | 6  | 0 | 0.04875589 | 2 | 9  | 0.6114001  | 0.5732208  |
| chr13 | 79303696 | 79303755 | 60     | 1 | 0 | 6  | 0 | 0.02793176 | 2 | 10 | 0.6114001  | 0.74627054 |
| chr13 | 79303755 | 79364211 | 60457  | 1 | 0 | 4  | 0 | 0.02074938 | 2 | 8  | 0.6114001  | 0.79906872 |
| chr13 | 79364211 | 79437810 | 73600  | 2 | 0 | 2  | 0 | 0.00493743 | 2 | 7  | 0.6114001  | 1.16581778 |
| chr13 | 79437810 | 79510542 | 72733  | 1 | 0 | 3  | 0 | 0.01598258 | 2 | 7  | 0.6114001  | 0.84395715 |
| chr13 | 79510542 | 79510601 | 60     | 1 | 0 | 5  | 0 | 0.04407651 | 2 | 8  | 0.6114001  | 0.58747015 |
| chr13 | 79510601 | 79618555 | 107955 | 1 | 0 | 5  | 0 | 0.07511598 | 2 | 7  | 0.6114001  | 0.43181735 |
| chr13 | 79618555 | 79618614 | 60     | 1 | 0 | 6  | 0 | 0.129913   | 2 | 7  | 0.6114001  | 0.30102999 |
| chr13 | 79618614 | 79669932 | 51319  | 1 | 0 | 6  | 0 | 0.30102999 | 2 | 5  | 0.6114001  | 0.12309572 |
| chr13 | 79669932 | 79669991 | 60     | 1 | 0 | 6  | 0 | 0.20064824 | 2 | 6  | 0.6114001  | 0.20064824 |
| chr13 | 79669991 | 79734671 | 64681  | 1 | 0 | 5  | 0 | 0.12309572 | 2 | 6  | 0.6114001  | 0.30102999 |
| chr13 | 79734671 | 79845490 | 110820 | 2 | 0 | 5  | 0 | 0.07511598 | 2 | 7  | 0.6114001  | 0.43181735 |
| chr13 | 79845490 | 79845549 | 60     | 1 | 0 | 6  | 0 | 0.129913   | 2 | 7  | 0.6114001  | 0.30102999 |
| chr13 | 79845549 | 79906078 | 60530  | 1 | 0 | 2  | 0 | 0.08289318 | 1 | 3  | 0.30102999 | 0.30102999 |
| chr13 | 79906078 | 79928673 | 22596  | 1 | 0 | 2  | 0 | 0.1575501  | 1 | 2  | 0.30102999 | 0.1575501  |
| chr13 | 79928673 | 79979070 | 50398  | 2 | 0 | 4  | 0 | 0.06713722 | 2 | 6  | 0.6114001  | 0.44141547 |
| chr13 | 79979070 | 80031549 | 52480  | 2 | 0 | 4  | 0 | 0.03812622 | 2 | 7  | 0.6114001  | 0.60763643 |
| chr13 | 80031549 | 80130697 | 99149  | 3 | 0 | 5  | 0 | 0.07511598 | 2 | 7  | 0.6114001  | 0.43181735 |
| chr13 | 80130697 | 80378551 | 247855 | 2 | 0 | 3  | 0 | 0.17593012 | 2 | 3  | 0.6114001  | 0.17593012 |
| chr13 | 80378551 | 80479338 | 100788 | 3 | 0 | 4  | 0 | 0.30102999 | 2 | 3  | 0.6114001  | 0.10122019 |
| chr13 | 80479338 | 80575921 | 96584  | 1 | 0 | 4  | 0 | 0.47744371 | 2 | 2  | 0.6114001  | 0.0429175  |
| chr13 | 80575921 | 80910339 | 334419 | 3 | 0 | 5  | 0 | 0.68214471 | 2 | 2  | 0.6114001  | 0.02162467 |
| chr13 | 80910339 | 80912899 | 2561   | 3 | 0 | 5  | 0 | 0.30102999 | 2 | 4  | 0.93173516 | 0.11390336 |
| chr13 | 80912899 | 81013592 | 100694 | 2 | 0 | 5  | 0 | 0.45545077 | 3 | 3  | 0.93173516 | 0.05670724 |
| chr13 | 81013592 | 81202719 | 189128 | 2 | 0 | 4  | 0 | 0.47744371 | 2 | 2  | 0.6114001  | 0.0429175  |
| chr13 | 81202719 | 81454057 | 251339 | 4 | 0 | 4  | 0 | 0.30102999 | 2 | 2  | 0.6114001  | 0.11390336 |
| chr13 | 81454057 | 81910085 | 456029 | 6 | 0 | 5  | 0 | 0.19510895 | 2 | 5  | 0.6114001  | 0.19510895 |
| chr13 | 81910085 | 82420867 | 150783 | 4 | 0 | 4  | 0 | 0.11390336 | 1 | 5  | 0.30102999 | 0.30102999 |
| chr13 | 82420867 | 82562672 | 141806 | 1 | 0 | 3  | 0 | 0.10122019 | 1 | 4  | 0.30102999 | 0.30102999 |
| chr13 | 82562672 | 82842459 | 279788 | 2 | 0 | 2  | 0 | 0.08289318 | 1 | 3  | 0.30102999 | 0.30102999 |
| chr13 | 82842459 | 82842518 | 60     | 1 | 0 | 2  | 0 | 0.0429175  | 1 | 4  | 0.30102999 | 0.47744371 |
| chr13 | 82842518 | 83102407 | 259890 | 1 | 0 | 2  | 0 | 0.08289318 | 1 | 3  | 0.30102999 | 0.30102999 |
| chr13 | 83102407 | 83494826 | 392420 | 5 | 0 | 1  | 0 | 0.0429175  | 1 |    |            |            |

|       |          |          |        |   |   |   |            |            |   |    |            |            |
|-------|----------|----------|--------|---|---|---|------------|------------|---|----|------------|------------|
| chr13 | 88507625 | 88596734 | 89110  | 2 | 0 | 3 | 0          | 0.17593012 | 2 | 3  | 0.61140001 | 0.17593012 |
| chr13 | 88596734 | 88789910 | 193177 | 3 | 0 | 3 | 0          | 0.10122019 | 2 | 4  | 0.61140001 | 0.30102999 |
| chr13 | 88789910 | 88958577 | 168668 | 2 | 0 | 2 | 0          | 0.1575501  | 2 | 2  | 0.61140001 | 0.1575501  |
| chr13 | 88958577 | 89212784 | 254208 | 1 | 0 | 1 | 0          | 0.1218695  | 2 | 1  | 0.61140001 | 0.1218695  |
| chr13 | 89212784 | 89342689 | 129906 | 1 | 0 | 1 | 0          | 0.1218695  | 1 | 1  | 0.30102999 | 0.1218695  |
| chr13 | 89342689 | 89960337 | 617649 | 5 | 0 | 1 | 0          | 0.1218695  | 0 | 1  | 0          | 0.1218695  |
| chr13 | 89960337 | 90017126 | 56790  | 2 | 0 | 1 | 0          | 0.1218695  | 1 | 1  | 0.30102999 | 0.1218695  |
| chr13 | 90017126 | 90223519 | 206394 | 3 | 0 | 3 | 0          | 0.30102999 | 1 | 1  | 0.30102999 | 0.08289318 |
| chr13 | 90223519 | 90661405 | 437887 | 4 | 0 | 3 | 0          | 0.51676182 | 1 | 2  | 0.30102999 | 0.02438896 |
| chr13 | 90661405 | 90723669 | 62265  | 2 | 1 | 3 | 0.1218695  | 0.51676182 | 1 | 1  | 0.1218695  | 0.02438896 |
| chr13 | 90723669 | 90822919 | 99251  | 3 | 1 | 3 | 0.02438896 | 0.30102999 | 3 | 2  | 0.51676182 | 0.08289318 |
| chr13 | 90822919 | 90881638 | 58720  | 3 | 1 | 4 | 0.02438896 | 0.30102999 | 3 | 3  | 0.51676182 | 0.10122019 |
| chr13 | 90881638 | 91016271 | 134634 | 2 | 1 | 4 | 0.1218695  | 0.30102999 | 1 | 2  | 0.1218695  | 0.08289318 |
| chr13 | 91016271 | 91120107 | 103837 | 2 | 1 | 4 | 0.02438896 | 0.30102999 | 3 | 3  | 0.51676182 | 0.10122019 |
| chr13 | 91120107 | 91280235 | 160129 | 2 | 1 | 4 | 0.02438896 | 0.18734596 | 3 | 4  | 0.51676182 | 0.18734596 |
| chr13 | 91280235 | 91426079 | 145845 | 3 | 1 | 4 | 0.00478973 | 0.18734596 | 5 | 4  | 1.02643191 | 0.18734596 |
| chr13 | 91426079 | 91497914 | 71836  | 2 | 1 | 4 | 0.00478973 | 0.06713722 | 5 | 6  | 1.02643191 | 0.44141547 |
| chr13 | 91497914 | 91497973 | 60     | 1 | 1 | 4 | 0.00478973 | 0.03812622 | 5 | 7  | 1.02643191 | 0.60763643 |
| chr13 | 91497973 | 91696368 | 198396 | 2 | 1 | 4 | 0.00478973 | 0.18734596 | 5 | 4  | 1.02643191 | 0.18734596 |
| chr13 | 91696368 | 91696427 | 60     | 1 | 2 | 5 | 0.02162467 | 0.12309572 | 5 | 6  | 0.68214471 | 0.30102999 |
| chr13 | 91696427 | 91816291 | 119865 | 1 | 2 | 4 | 0.02162467 | 0.11390336 | 5 | 5  | 0.68214471 | 0.30102999 |
| chr13 | 91816291 | 91816350 | 60     | 1 | 1 | 4 | 0.02162467 | 0.06713722 | 4 | 5  | 0.68214471 | 0.44141547 |
| chr13 | 91816350 | 91927724 | 111375 | 1 | 1 | 4 | 0.00478973 | 0.11390336 | 5 | 5  | 1.02643191 | 0.30102999 |
| chr13 | 91927724 | 91927783 | 60     | 1 | 1 | 5 | 0.00478973 | 0.19510895 | 5 | 5  | 1.02643191 | 0.19510895 |
| chr13 | 91927783 | 92012364 | 84582  | 3 | 1 | 4 | 0.00478973 | 0.11390336 | 5 | 5  | 1.02643191 | 0.30102999 |
| chr13 | 92012364 | 92065660 | 53297  | 2 | 1 | 4 | 0.01091641 | 0.11390336 | 4 | 4  | 0.76005302 | 0.30102999 |
| chr13 | 92065660 | 92101189 | 35530  | 2 | 2 | 5 | 0.02162467 | 0.07511598 | 5 | 7  | 0.68214471 | 0.43181735 |
| chr13 | 92101189 | 92209911 | 108723 | 2 | 2 | 5 | 0.02162467 | 0.12309572 | 5 | 6  | 0.68214471 | 0.30102999 |
| chr13 | 92209911 | 92308949 | 99039  | 4 | 3 | 6 | 0.05670724 | 0.129913   | 5 | 7  | 0.45545077 | 0.30102999 |
| chr13 | 92308949 | 92345560 | 36612  | 1 | 3 | 5 | 0.05670724 | 0.07511598 | 5 | 7  | 0.45545077 | 0.43181735 |
| chr13 | 92345560 | 92378959 | 33400  | 2 | 3 | 6 | 0.05670724 | 0.129913   | 5 | 7  | 0.45545077 | 0.30102999 |
| chr13 | 92378959 | 92416837 | 37879  | 1 | 3 | 6 | 0.10122019 | 0.129913   | 4 | 7  | 0.30102999 | 0.30102999 |
| chr13 | 92416837 | 92416896 | 60     | 1 | 3 | 6 | 0.10122019 | 0.08122616 | 4 | 8  | 0.30102999 | 0.4250187  |
| chr13 | 92416896 | 92494334 | 77439  | 1 | 2 | 6 | 0.0429175  | 0.08122616 | 4 | 8  | 0.47744371 | 0.4250187  |
| chr13 | 92494334 | 92658278 | 163945 | 5 | 2 | 6 | 0.02162467 | 0.08122616 | 5 | 8  | 0.68214471 | 0.4250187  |
| chr13 | 92658278 | 92760894 | 102617 | 2 | 2 | 6 | 0.0429175  | 0.08122616 | 4 | 8  | 0.47744371 | 0.4250187  |
| chr13 | 92760894 | 92802517 | 41624  | 2 | 2 | 6 | 0.02162467 | 0.08122616 | 5 | 8  | 0.68214471 | 0.4250187  |
| chr13 | 92802517 | 92802576 | 60     | 1 | 2 | 6 | 0.02162467 | 0.04875589 | 5 | 9  | 0.68214471 | 0.5732208  |
| chr13 | 92802576 | 92867649 | 65074  | 2 | 2 | 6 | 0.02162467 | 0.08122616 | 5 | 8  | 0.68214471 | 0.4250187  |
| chr13 | 92867649 | 92892528 | 24880  | 1 | 2 | 6 | 0.02162467 | 0.20064824 | 5 | 6  | 0.68214471 | 0.20064824 |
| chr13 | 92892528 | 92973314 | 80787  | 3 | 2 | 6 | 0.02162467 | 0.129913   | 5 | 7  | 0.68214471 | 0.30102999 |
| chr13 | 92973314 | 92973373 | 60     | 1 | 2 | 6 | 0.02162467 | 0.08122616 | 5 | 8  | 0.68214471 | 0.4250187  |
| chr13 | 92973373 | 93054510 | 81138  | 2 | 2 | 5 | 0.0429175  | 0.04407651 | 4 | 8  | 0.47744371 | 0.58747015 |
| chr13 | 93054510 | 93119090 | 64581  | 2 | 4 | 8 | 0.0429175  | 0.02074938 | 4 | 8  | 0.47744371 | 0.79906872 |
| chr13 | 93119090 | 93119149 | 60     | 1 | 2 | 4 | 0.0429175  | 0.01077081 | 4 | 9  | 0.47744371 | 1.01542894 |
| chr13 | 93119149 | 93184346 | 65198  | 2 | 4 | 4 | 0.08289318 | 0.02074938 | 3 | 8  | 0.30102999 | 0.79906872 |
| chr13 | 93184346 | 93231896 | 47551  | 2 | 2 | 5 | 0.08289318 | 0.02473314 | 2 | 9  | 0.30102999 | 0.76806864 |
| chr13 | 93231896 | 93309704 | 77809  | 2 | 2 | 5 | 0.1575501  | 0.02473314 | 2 | 9  | 0.1575501  | 0.76806864 |
| chr13 | 93309704 | 93390362 | 80659  | 2 | 2 | 6 | 0.1575501  | 0.04875589 | 2 | 9  | 0.1575501  | 0.5732208  |
| chr13 | 93390362 | 93608868 | 218507 | 5 | 2 | 6 | 0.08289318 | 0.04875589 | 3 | 9  | 0.30102999 | 0.5732208  |
| chr13 | 93608868 | 93608927 | 60     | 1 | 2 | 6 | 0.08289318 | 0.02793176 | 3 | 10 | 0.30102999 | 0.74627054 |
| chr13 | 93608927 | 93879442 | 270516 | 2 | 2 | 6 | 0.08289318 | 0.04875589 | 3 | 9  | 0.30102999 | 0.5732208  |
| chr13 | 93879442 | 93925051 | 45610  | 1 | 1 | 6 | 0.02438896 | 0.04875589 | 3 | 9  | 0.51676182 | 0.5732208  |
| chr13 | 93925051 | 93989415 | 64365  | 2 | 1 | 6 | 0.01091641 | 0.04875589 | 4 | 9  | 0.76005302 | 0.5732208  |
| chr13 | 93989415 | 94035921 | 46507  | 3 | 2 | 6 | 0.0429175  | 0.04875589 | 3 | 9  | 0.47744371 | 0.5732208  |
| chr13 | 94035921 | 94149606 | 113686 | 4 | 2 | 6 | 0.0429175  | 0.02793176 | 4 | 10 | 0.47744371 | 0.74627054 |
| chr13 | 94149606 | 94149665 | 60     | 1 | 2 | 7 | 0.0429175  | 0.05232577 | 4 | 10 | 0.47744371 | 0.56314362 |
| chr13 | 94149665 | 94259064 | 109400 | 2 | 2 | 6 | 0.0429175  | 0.04875589 | 4 | 9  | 0.47744371 | 0.5732208  |
| chr13 | 94259064 | 94259123 | 60     | 1 | 2 | 7 | 0.0429175  | 0.08584816 | 4 | 9  | 0.47744371 | 0.42015402 |
| chr13 | 94259123 | 94342109 | 82987  | 2 | 2 | 7 | 0.0429175  | 0.13499366 | 4 | 8  | 0.47744371 | 0.30102999 |
| chr13 | 94342109 | 94342168 | 60     | 1 | 2 | 7 | 0.0429175  | 0.08584816 | 4 | 9  | 0.47744371 | 0.42015402 |
| chr13 | 94342168 | 94423150 | 80983  | 2 | 2 | 6 | 0.0429175  | 0.08122616 | 4 | 8  | 0.47744371 | 0.4250187  |
| chr13 | 94423150 | 94449221 | 26072  | 2 | 2 | 6 | 0.0429175  | 0.04875589 | 4 | 9  | 0.47744371 | 0.5732208  |
| chr13 | 94449221 | 94493889 | 44669  | 1 | 2 | 5 | 0.0429175  | 0.02473314 | 4 | 9  | 0.47744371 | 0.76806864 |
| chr13 | 94493889 | 94540422 | 46534  | 2 | 2 | 5 | 0.0429175  | 0.01320236 | 4 | 10 | 0.47744371 | 0.97397077 |
| chr13 | 94540422 | 94625639 | 85218  | 3 | 2 | 6 | 0.0429175  | 0.02793176 | 4 | 10 | 0.47744371 | 0.74627054 |
| chr13 | 94625639 | 94625698 | 60     | 1 | 2 | 7 | 0.0429175  | 0.05232577 | 4 | 10 | 0.47744371 | 0.56314362 |
| chr13 | 94625698 | 94704797 | 79100  | 2 | 2 | 5 | 0.0429175  | 0.02473314 | 4 | 9  | 0.47744371 | 0.76806864 |
| chr13 | 94704797 | 94704856 | 60     | 1 | 2 | 5 | 0.02162467 | 0.01320236 | 5 | 9  | 0.68214471 | 0.97397077 |
| chr13 | 94704856 | 94776501 | 71646  | 1 | 2 | 5 | 0.0429175  | 0.01320236 | 4 | 9  | 0.47744371 | 0.97397077 |
| chr13 | 94776501 | 94844214 | 67714  | 2 | 2 | 4 | 0.0429175  | 0.00530919 | 4 | 10 | 0.47744371 | 1.2568129  |
| chr13 | 94844214 | 94875259 | 31046  | 2 | 2 | 4 | 0.02162467 | 0.00530919 | 5 | 9  | 0.68214471 | 1.2568129  |
| chr13 | 94875259 | 94908343 | 33085  | 1 | 2 | 4 | 0.0429175  | 0.01077081 | 4 | 9  | 0.47744371 | 1.01542894 |
| chr13 | 94908343 | 94939488 | 31146  | 2 | 2 | 5 | 0.0429175  | 0.02473314 | 4 | 9  | 0.47744371 | 0.76806864 |
| chr13 | 94939488 | 94993996 | 54509  | 2 | 2 | 5 | 0.0429175  | 0.01320236 | 4 | 10 | 0.47744371 | 0.97397077 |
| chr13 | 94993996 | 95020009 | 26014  | 2 | 2 | 6 | 0.02162467 | 0.02793176 | 5 | 10 | 0.68214471 | 0.74627054 |
| chr13 | 95020009 | 95090629 | 70621  | 2 | 2 | 5 | 0.02162467 | 0.01320236 | 5 | 10 | 0.68214471 | 0.97397077 |
| chr13 | 95090629 | 95092088 | 1460   | 3 | 2 | 6 | 0.02162467 | 0.02793176 | 5 | 10 | 0.68214471 | 0.74627054 |
| chr13 | 95092088 | 95119866 | 27779  | 1 | 2 | 6 | 0.0429175  | 0.04875589 | 4 | 9  | 0.47744371 | 0.5732208  |
| chr13 | 95119866 | 95131814 | 11949  | 1 | 2 | 6 | 0.0429175  | 0.08122616 | 4 | 8  | 0.47744371 | 0.4250187  |
| chr13 | 95131814 | 95131873 | 60     | 1 | 2 | 6 | 0.02162467 | 0.04875589 | 5 | 9  | 0.68214471 | 0.5732208  |
| chr13 | 95131873 | 95329547 | 197675 | 5 | 2 | 6 | 0.02162467 | 0.08122616 | 5 | 8  | 0.68214471 | 0.4250187  |
| chr13 | 95329547 | 95450110 | 120564 | 3 | 2 | 5 | 0.02162467 | 0.07511598 | 5 | 7  | 0.68214471 | 0.43181735 |
| chr13 | 95450110 | 95518286 | 68177  | 2 | 2 | 5 | 0.01053319 | 0.07511598 | 6 | 7  | 0.91219088 | 0.43181735 |
| chr13 | 95518286 | 95651213 | 132928 | 4 | 2 | 6 | 0.01053319 | 0.08122616 | 6 | 8  | 0.91219088 | 0.4250187  |
| chr13 | 95651213 | 95651272 | 60     | 1 | 2 | 6 | 0.01053319 | 0.04875589 | 6 | 9  | 0.91219088 | 0.5732208  |
| chr13 | 95651272 | 95718528 | 67257  | 2 | 2 | 6 | 0.01053319 | 0.02473314 | 6 | 9  | 0.91219088 | 0.76806864 |
| chr13 | 95718528 | 95834150 | 115623 | 3 | 2 | 5 | 0.01053319 | 0.04407651 | 6 | 8  | 0.91219088 | 0.58747015 |
| chr13 | 95834150 | 95834209 | 60     | 1 | 2 | 5 | 0.0409743  | 0.04407651 | 7 | 8  | 1.16581773 | 0.58747015 |
| chr13 | 95834209 | 95991527 | 157319 | 4 | 2 | 5 | 0.01053319 | 0.04407651 | 6 | 8  | 0.91219088 | 0.58747015 |
| chr13 | 9599152  |          |        |   |   |   |            |            |   |    |            |            |

|       |           |             |        |    |   |    |            |            |   |   |            |            |
|-------|-----------|-------------|--------|----|---|----|------------|------------|---|---|------------|------------|
| chr13 | 98828485  | 98930835    | 102351 | 2  | 3 | 3  | 0.05670724 | 0.10122019 | 5 | 4 | 0.45545077 | 0.30102999 |
| chr13 | 98930835  | 98930894    | 60     | 1  | 3 | 3  | 0.05670724 | 0.05670724 | 5 | 5 | 0.45545077 | 0.45545077 |
| chr13 | 98930894  | 99104744    | 173851 | 3  | 3 | 3  | 0.10122019 | 0.10122019 | 4 | 4 | 0.30102999 | 0.30102999 |
| chr13 | 99104744  | 99171384    | 66641  | 2  | 3 | 3  | 0.10122019 | 0.05670724 | 4 | 4 | 0.30102999 | 0.45545077 |
| chr13 | 99171384  | 99290848    | 119465 | 3  | 3 | 3  | 0.10122019 | 0.10122019 | 4 | 4 | 0.30102999 | 0.30102999 |
| chr13 | 99290848  | 99358500    | 67653  | 3  | 3 | 3  | 0.10122019 | 0.05670724 | 4 | 5 | 0.30102999 | 0.45545077 |
| chr13 | 99358500  | 99505636    | 147137 | 4  | 3 | 3  | 0.10122019 | 0.10122019 | 4 | 4 | 0.30102999 | 0.30102999 |
| chr13 | 99505636  | 99607671    | 102036 | 3  | 3 | 3  | 0.10122019 | 0.05670724 | 4 | 4 | 0.30102999 | 0.45545077 |
| chr13 | 99607671  | 99647199    | 39529  | 2  | 3 | 4  | 0.10122019 | 0.11390336 | 4 | 5 | 0.30102999 | 0.30102999 |
| chr13 | 99647199  | 99647258    | 60     | 1  | 3 | 4  | 0.05670724 | 0.06713722 | 5 | 6 | 0.45545077 | 0.44141547 |
| chr13 | 99647258  | 99716241    | 68984  | 1  | 3 | 4  | 0.10122019 | 0.06713722 | 4 | 6 | 0.30102999 | 0.44141547 |
| chr13 | 99716241  | 99812285    | 96045  | 2  | 3 | 4  | 0.10122019 | 0.03812622 | 4 | 7 | 0.30102999 | 0.60763643 |
| chr13 | 99812285  | 99812344    | 60     | 1  | 3 | 4  | 0.05670724 | 0.03812622 | 5 | 7 | 0.45545077 | 0.60763643 |
| chr13 | 99812344  | 99853732    | 41389  | 1  | 3 | 4  | 0.10122019 | 0.03812622 | 4 | 7 | 0.30102999 | 0.60763643 |
| chr13 | 99853732  | 99854558    | 827    | 1  | 3 | 4  | 0.17593012 | 0.03812622 | 3 | 7 | 0.17593012 | 0.60763643 |
| chr13 | 99854558  | 99907913    | 53356  | 1  | 3 | 4  | 0.17593012 | 0.06713722 | 3 | 6 | 0.17593012 | 0.44141547 |
| chr13 | 99907913  | 99947094    | 39182  | 2  | 3 | 4  | 0.05670724 | 0.06713722 | 5 | 6 | 0.45545077 | 0.44141547 |
| chr13 | 99947094  | 99984590    | 37497  | 2  | 3 | 4  | 0.10122019 | 0.11390336 | 4 | 5 | 0.30102999 | 0.30102999 |
| chr13 | 99984590  | 100025027   | 40438  | 3  | 3 | 4  | 0.05670724 | 0.11390336 | 5 | 5 | 0.45545077 | 0.30102999 |
| chr13 | 100025027 | 100124570   | 99544  | 3  | 3 | 4  | 0.05670724 | 0.06713722 | 3 | 6 | 0.45545077 | 0.44141547 |
| chr13 | 100124570 | 100169918   | 45349  | 2  | 3 | 4  | 0.03070643 | 0.06713722 | 6 | 6 | 0.63695542 | 0.44141547 |
| chr13 | 100169918 | 100619381   | 44964  | 11 | 3 | 4  | 0.03070643 | 0.11390336 | 6 | 5 | 0.63695542 | 0.30102999 |
| chr13 | 100619381 | 100724801   | 105421 | 4  | 3 | 4  | 0.01598258 | 0.11390336 | 4 | 7 | 0.84397515 | 0.30102999 |
| chr13 | 100724801 | 100764168   | 39368  | 2  | 3 | 4  | 0.0079614  | 0.11390336 | 8 | 5 | 1.07548421 | 0.30102999 |
| chr13 | 100764168 | 100856717   | 92550  | 2  | 3 | 4  | 0.01598258 | 0.11390336 | 7 | 5 | 0.84397515 | 0.30102999 |
| chr13 | 100856717 | 100887693   | 30977  | 2  | 3 | 4  | 0.0079614  | 0.11390336 | 8 | 5 | 1.07548421 | 0.30102999 |
| chr13 | 100887693 | 100957735   | 70043  | 2  | 3 | 4  | 0.01598258 | 0.11390336 | 7 | 5 | 0.84397515 | 0.30102999 |
| chr13 | 100957735 | 100957794   | 60     | 1  | 3 | 4  | 0.0079614  | 0.11390336 | 8 | 5 | 1.07548421 | 0.30102999 |
| chr13 | 100957794 | 100992463   | 34670  | 1  | 3 | 4  | 0.0079614  | 0.18734596 | 8 | 4 | 1.07548421 | 0.18734596 |
| chr13 | 100992463 | 101018388   | 25926  | 2  | 3 | 4  | 0.0079614  | 0.11390336 | 8 | 5 | 1.07548421 | 0.30102999 |
| chr13 | 101018388 | 101118078   | 99691  | 2  | 3 | 4  | 0.03070643 | 0.11390336 | 6 | 5 | 0.63695542 | 0.30102999 |
| chr13 | 101118078 | 101358431   | 240354 | 8  | 3 | 4  | 0.03070643 | 0.06713722 | 6 | 6 | 0.63695542 | 0.44141547 |
| chr13 | 101358431 | 101358490   | 60     | 1  | 3 | 4  | 0.01598258 | 0.06713722 | 7 | 6 | 0.84397515 | 0.44141547 |
| chr13 | 101358490 | 101436121   | 77632  | 2  | 3 | 4  | 0.03070643 | 0.06713722 | 6 | 6 | 0.63695542 | 0.44141547 |
| chr13 | 101436121 | 101475155   | 39035  | 1  | 3 | 4  | 0.03070643 | 0.11390336 | 6 | 5 | 0.63695542 | 0.30102999 |
| chr13 | 101475155 | 101522919   | 47765  | 2  | 3 | 4  | 0.01598258 | 0.11390336 | 7 | 5 | 0.84397515 | 0.30102999 |
| chr13 | 101522919 | 101587295   | 64377  | 1  | 3 | 4  | 0.03070643 | 0.11390336 | 6 | 5 | 0.63695542 | 0.30102999 |
| chr13 | 101587295 | 101633906   | 46612  | 1  | 3 | 4  | 0.03070643 | 0.18734596 | 6 | 4 | 0.63695542 | 0.18734596 |
| chr13 | 101633906 | 101633965   | 60     | 1  | 3 | 4  | 0.03070643 | 0.11390336 | 6 | 5 | 0.63695542 | 0.30102999 |
| chr13 | 101633965 | 101690813   | 56849  | 1  | 3 | 4  | 0.03070643 | 0.18734596 | 6 | 4 | 0.63695542 | 0.18734596 |
| chr13 | 101690813 | 101690872   | 60     | 1  | 3 | 4  | 0.03070643 | 0.11390336 | 6 | 5 | 0.63695542 | 0.30102999 |
| chr13 | 101690872 | 101785219   | 94348  | 2  | 3 | 4  | 0.03070643 | 0.18734596 | 6 | 4 | 0.63695542 | 0.18734596 |
| chr13 | 101785219 | 101833223   | 48005  | 2  | 3 | 4  | 0.03070643 | 0.06713722 | 6 | 6 | 0.63695542 | 0.44141547 |
| chr13 | 101833223 | 101833281   | 59     | 1  | 3 | 5  | 0.03070643 | 0.07511598 | 6 | 7 | 0.63695542 | 0.43181735 |
| chr13 | 101833281 | 102040093   | 206813 | 5  | 3 | 3  | 0.05670724 | 0.01598258 | 5 | 7 | 0.45545077 | 0.84397515 |
| chr13 | 102040093 | 102139699   | 99607  | 5  | 3 | 3  | 0.03070643 | 0.01598258 | 6 | 7 | 0.63695542 | 0.84397515 |
| chr13 | 102139699 | 102168309   | 28611  | 2  | 3 | 4  | 0.03070643 | 0.03812622 | 7 | 6 | 0.63695542 | 0.60763643 |
| chr13 | 102168309 | 102211574   | 43266  | 1  | 3 | 4  | 0.05670724 | 0.03812622 | 5 | 7 | 0.45545077 | 0.60763643 |
| chr13 | 102211574 | 102244663   | 33090  | 2  | 3 | 4  | 0.03070643 | 0.03812622 | 6 | 7 | 0.63695542 | 0.60763643 |
| chr13 | 102244663 | 102244722   | 60     | 1  | 3 | 4  | 0.03070643 | 0.02074938 | 6 | 8 | 0.63695542 | 0.79906872 |
| chr13 | 102244722 | 102398697   | 153976 | 6  | 3 | 4  | 0.05670724 | 0.03812622 | 5 | 7 | 0.45545077 | 0.60763643 |
| chr13 | 102398697 | 102398756   | 60     | 1  | 3 | 4  | 0.05670724 | 0.02074938 | 8 | 5 | 0.45545077 | 0.79906872 |
| chr13 | 102398756 | 102459721   | 60966  | 2  | 3 | 4  | 0.05670724 | 0.03812622 | 5 | 7 | 0.45545077 | 0.60763643 |
| chr13 | 102459721 | 102459780   | 60     | 1  | 3 | 4  | 0.05670724 | 0.01077081 | 5 | 9 | 0.45545077 | 1.01542894 |
| chr13 | 102459780 | 102556358   | 96579  | 2  | 3 | 4  | 0.05670724 | 0.03812622 | 5 | 7 | 0.45545077 | 0.60763643 |
| chr13 | 102556358 | 102591934   | 35577  | 2  | 3 | 5  | 0.03070643 | 0.04407651 | 6 | 8 | 0.63695542 | 0.58747015 |
| chr13 | 102591934 | 102620166   | 28233  | 2  | 3 | 6  | 0.03070643 | 0.08122616 | 6 | 8 | 0.63695542 | 0.4250187  |
| chr13 | 102620166 | 102681695   | 61530  | 2  | 3 | 5  | 0.05670724 | 0.07511598 | 5 | 7 | 0.45545077 | 0.43181735 |
| chr13 | 102681695 | 102681754   | 60     | 1  | 3 | 6  | 0.03070643 | 0.08122616 | 6 | 8 | 0.63695542 | 0.4250187  |
| chr13 | 102681754 | 102724000   | 42247  | 1  | 3 | 6  | 0.05670724 | 0.08122616 | 5 | 8 | 0.45545077 | 0.4250187  |
| chr13 | 102724000 | 102757483   | 33484  | 2  | 3 | 8  | 0.05670724 | 0.20764654 | 5 | 8 | 0.45545077 | 0.20764654 |
| chr13 | 102757483 | 102815308   | 57826  | 3  | 3 | 10 | 0.05670724 | 0.4167287  | 5 | 8 | 0.45545077 | 0.08923391 |
| chr13 | 102815308 | 102815367   | 60     | 1  | 3 | 10 | 0.03070643 | 0.4167287  | 8 | 8 | 0.63695542 | 0.08923391 |
| chr13 | 102815367 | 102864733   | 49367  | 1  | 3 | 7  | 0.03070643 | 0.13499366 | 6 | 8 | 0.63695542 | 0.30102999 |
| chr13 | 102864733 | 102927483   | 62753  | 1  | 3 | 7  | 0.05670724 | 0.13499366 | 5 | 8 | 0.45545077 | 0.30102999 |
| chr13 | 102927483 | 102927544   | 60     | 1  | 3 | 7  | 0.05670724 | 0.08534471 | 9 | 4 | 0.45545077 | 0.42015402 |
| chr13 | 102927544 | 103053854   | 126311 | 3  | 3 | 7  | 0.05670724 | 0.13499366 | 8 | 5 | 0.45545077 | 0.30102999 |
| chr13 | 103053854 | 103053906   | 53     | 1  | 3 | 7  | 0.01598258 | 0.13499366 | 7 | 8 | 0.84397515 | 0.30102999 |
| chr13 | 103053906 | 103122670   | 68765  | 1  | 3 | 6  | 0.01598258 | 0.129913   | 7 | 7 | 0.84397515 | 0.30102999 |
| chr13 | 103122670 | 103219570   | 96901  | 1  | 3 | 4  | 0.01598258 | 0.03812622 | 7 | 7 | 0.84397515 | 0.60763643 |
| chr13 | 103219570 | 103275381   | 55812  | 2  | 3 | 4  | 0.03070643 | 0.03812622 | 6 | 7 | 0.63695542 | 0.60763643 |
| chr13 | 103275381 | 103299583   | 24203  | 1  | 3 | 4  | 0.05670724 | 0.03812622 | 5 | 7 | 0.45545077 | 0.60763643 |
| chr13 | 103299583 | 103326838   | 27256  | 2  | 3 | 6  | 0.129913   | 0.03812622 | 7 | 7 | 0.63695542 | 0.30102999 |
| chr13 | 103326838 | 103378641   | 51804  | 1  | 3 | 4  | 0.03070643 | 0.06713722 | 6 | 6 | 0.63695542 | 0.44141547 |
| chr13 | 103378641 | 103378700   | 60     | 1  | 3 | 5  | 0.01598258 | 0.12309572 | 7 | 6 | 0.84397515 | 0.30102999 |
| chr13 | 103378700 | 103422437   | 43738  | 1  | 3 | 5  | 0.05670724 | 0.12309572 | 5 | 6 | 0.45545077 | 0.30102999 |
| chr13 | 103422437 | 103457665   | 35229  | 1  | 3 | 5  | 0.17593012 | 0.12309572 | 3 | 6 | 0.17593012 | 0.30102999 |
| chr13 | 103457665 | 103520481   | 62817  | 2  | 3 | 6  | 0.17593012 | 0.20064824 | 3 | 6 | 0.17593012 | 0.20064824 |
| chr13 | 103520481 | 103527663   | 7183   | 2  | 3 | 6  | 0.129913   | 0.129913   | 3 | 7 | 0.17593012 | 0.30102999 |
| chr13 | 103527663 | 103544551   | 16889  | 2  | 3 | 6  | 0.10122019 | 0.129913   | 4 | 7 | 0.30102999 | 0.30102999 |
| chr13 | 103544551 | 103581756   | 37206  | 1  | 3 | 5  | 0.17593012 | 0.07511598 | 3 | 7 | 0.17593012 | 0.43181735 |
| chr13 | 103581756 | 103658425   | 76670  | 1  | 3 | 5  | 0.30102999 | 0.07511598 | 2 | 7 | 0.08289318 | 0.43181735 |
| chr13 | 103658425 | 103701471   | 43047  | 2  | 3 | 6  | 0.30102999 | 0.129913   | 2 | 7 | 0.08289318 | 0.30102999 |
| chr13 | 103701471 | 103710668   | 9198   | 2  | 3 | 6  | 0.17593012 | 0.129913   | 3 | 7 | 0.17593012 | 0.30102999 |
| chr13 | 103710668 | 103751219   | 40552  | 1  | 3 | 5  | 0.17593012 | 0.07511598 | 3 | 7 | 0.17593012 | 0.43181735 |
| chr13 | 103751219 | 103880144   | 128926 | 1  | 2 | 5  | 0.08289318 | 0.30102999 | 3 | 4 | 0.30102999 | 0.11390336 |
| chr13 | 103880144 | 104016853   | 136710 | 1  | 2 | 5  | 0.08289318 | 0.45545077 | 3 | 3 | 0.30102999 | 0.05670724 |
| chr13 | 104016853 | 104114620   | 97768  | 2  | 3 | 5  | 0.17593012 | 0.45545077 | 3 | 3 | 0.17593012 | 0.05670724 |
| chr13 | 104114620 | 104114679</ |        |    |   |    |            |            |   |   |            |            |

|       |           |           |        |    |   |   |            |            |   |   |            |            |
|-------|-----------|-----------|--------|----|---|---|------------|------------|---|---|------------|------------|
| chr13 | 108740117 | 108861247 | 121131 | 1  | 4 | 4 | 0.11390336 | 0.18734596 | 5 | 4 | 0.30102999 | 0.18734596 |
| chr13 | 108861247 | 108862425 | 1179   | 2  | 4 | 5 | 0.06713722 | 0.30102999 | 6 | 4 | 0.44141547 | 0.11390336 |
| chr13 | 108862425 | 108882377 | 1953   | 4  | 4 | 6 | 0.06713722 | 0.20064824 | 6 | 6 | 0.44141547 | 0.20064824 |
| chr13 | 108882377 | 108942334 | 5958   | 2  | 4 | 6 | 0.11390336 | 0.30102999 | 5 | 5 | 0.30102999 | 0.12309572 |
| chr13 | 108942334 | 109098737 | 156404 | 1  | 4 | 6 | 0.18734596 | 0.30102999 | 4 | 4 | 0.18734596 | 0.12309572 |
| chr13 | 109098737 | 109178419 | 79683  | 2  | 4 | 6 | 0.18734596 | 0.20064824 | 4 | 6 | 0.18734596 | 0.20064824 |
| chr13 | 109178419 | 109232544 | 54126  | 1  | 4 | 6 | 0.18734596 | 0.30102999 | 4 | 4 | 0.18734596 | 0.12309572 |
| chr13 | 109232544 | 109375320 | 142777 | 2  | 4 | 4 | 0.18734596 | 0.19510895 | 4 | 5 | 0.18734596 | 0.19510895 |
| chr13 | 109375320 | 109417050 | 41731  | 4  | 4 | 5 | 0.18734596 | 0.30102999 | 4 | 5 | 0.18734596 | 0.12309572 |
| chr13 | 109417050 | 109507476 | 90427  | 4  | 4 | 6 | 0.18734596 | 0.20064824 | 4 | 6 | 0.18734596 | 0.20064824 |
| chr13 | 109507476 | 109650289 | 142814 | 5  | 4 | 6 | 0.11390336 | 0.20064824 | 5 | 6 | 0.30102999 | 0.20064824 |
| chr13 | 109650289 | 109710335 | 60047  | 2  | 4 | 6 | 0.11390336 | 0.30102999 | 5 | 5 | 0.30102999 | 0.12309572 |
| chr13 | 109710335 | 109760877 | 50543  | 1  | 4 | 6 | 0.11390336 | 0.44141547 | 5 | 4 | 0.30102999 | 0.06713722 |
| chr13 | 109760877 | 110015855 | 254979 | 4  | 4 | 5 | 0.11390336 | 0.30102999 | 5 | 4 | 0.30102999 | 0.11390336 |
| chr13 | 110015855 | 110131664 | 115810 | 2  | 4 | 5 | 0.06713722 | 0.30102999 | 6 | 4 | 0.44141547 | 0.11390336 |
| chr13 | 110131664 | 110131723 | 60     | 1  | 4 | 5 | 0.03812622 | 0.30102999 | 7 | 4 | 0.60763643 | 0.11390336 |
| chr13 | 110131723 | 110276185 | 144463 | 1  | 4 | 5 | 0.06713722 | 0.30102999 | 6 | 4 | 0.44141547 | 0.11390336 |
| chr13 | 110276185 | 110407213 | 131029 | 1  | 4 | 4 | 0.06713722 | 0.18734596 | 6 | 4 | 0.44141547 | 0.18734596 |
| chr13 | 110407213 | 110407272 | 60     | 1  | 4 | 4 | 0.06713722 | 0.30102999 | 6 | 4 | 0.44141547 | 0.11390336 |
| chr13 | 110407272 | 110488132 | 80861  | 2  | 4 | 4 | 0.06713722 | 0.18734596 | 6 | 4 | 0.44141547 | 0.18734596 |
| chr13 | 110488132 | 110665501 | 177370 | 3  | 4 | 5 | 0.06713722 | 0.30102999 | 6 | 4 | 0.44141547 | 0.11390336 |
| chr13 | 110665501 | 110801757 | 136257 | 2  | 4 | 5 | 0.06713722 | 0.45545077 | 6 | 4 | 0.44141547 | 0.05670724 |
| chr13 | 110801757 | 110866183 | 64427  | 1  | 3 | 5 | 0.05670724 | 0.45545077 | 5 | 3 | 0.45545077 | 0.05670724 |
| chr13 | 110866183 | 110895000 | 28818  | 2  | 3 | 5 | 0.05670724 | 0.30102999 | 5 | 4 | 0.45545077 | 0.11390336 |
| chr13 | 110895000 | 110982428 | 87429  | 3  | 4 | 5 | 0.06713722 | 0.30102999 | 6 | 4 | 0.44141547 | 0.11390336 |
| chr13 | 110982428 | 111090376 | 107949 | 3  | 4 | 5 | 0.03812622 | 0.12309572 | 7 | 6 | 0.60763643 | 0.30102999 |
| chr13 | 111090376 | 111212852 | 122477 | 3  | 4 | 5 | 0.03812622 | 0.19510895 | 7 | 5 | 0.60763643 | 0.19510895 |
| chr13 | 111212852 | 111212911 | 60     | 1  | 4 | 5 | 0.03812622 | 0.12309572 | 7 | 6 | 0.60763643 | 0.30102999 |
| chr13 | 111212911 | 111269919 | 57009  | 1  | 4 | 5 | 0.03812622 | 0.19510895 | 7 | 5 | 0.60763643 | 0.19510895 |
| chr13 | 111269919 | 111406917 | 136999 | 8  | 4 | 5 | 0.02074938 | 0.19510895 | 8 | 5 | 0.79906872 | 0.19510895 |
| chr13 | 111406917 | 111550565 | 143649 | 4  | 4 | 5 | 0.02074938 | 0.30102999 | 8 | 4 | 0.79906872 | 0.11390336 |
| chr13 | 111550565 | 111558497 | 7933   | 2  | 4 | 5 | 0.02074938 | 0.19510895 | 8 | 5 | 0.79906872 | 0.19510895 |
| chr13 | 111558497 | 111603577 | 45081  | 1  | 4 | 5 | 0.03812622 | 0.19510895 | 7 | 5 | 0.60763643 | 0.19510895 |
| chr13 | 111603577 | 111729981 | 126405 | 2  | 4 | 5 | 0.03812622 | 0.30102999 | 7 | 4 | 0.60763643 | 0.11390336 |
| chr13 | 111729981 | 111778204 | 48224  | 2  | 4 | 5 | 0.03812622 | 0.19510895 | 7 | 5 | 0.60763643 | 0.19510895 |
| chr13 | 111778204 | 111805036 | 26833  | 1  | 4 | 5 | 0.06713722 | 0.19510895 | 6 | 5 | 0.44141547 | 0.19510895 |
| chr13 | 111805036 | 111857674 | 52639  | 2  | 4 | 5 | 0.03812622 | 0.19510895 | 7 | 5 | 0.60763643 | 0.19510895 |
| chr13 | 111857674 | 111857733 | 60     | 1  | 4 | 5 | 0.02074938 | 0.19510895 | 8 | 5 | 0.79906872 | 0.19510895 |
| chr13 | 111857733 | 111884549 | 26817  | 1  | 4 | 5 | 0.03812622 | 0.19510895 | 7 | 5 | 0.60763643 | 0.19510895 |
| chr13 | 111884549 | 112129927 | 245379 | 5  | 4 | 5 | 0.06713722 | 0.30102999 | 6 | 4 | 0.44141547 | 0.11390336 |
| chr13 | 112129927 | 112193572 | 63646  | 1  | 4 | 4 | 0.06713722 | 0.18734596 | 6 | 4 | 0.44141547 | 0.18734596 |
| chr13 | 112193572 | 11228616  | 35045  | 1  | 4 | 4 | 0.11390336 | 0.18734596 | 5 | 4 | 0.30102999 | 0.18734596 |
| chr13 | 11228616  | 112255958 | 27343  | 2  | 4 | 4 | 0.06713722 | 0.18734596 | 6 | 4 | 0.44141547 | 0.18734596 |
| chr13 | 112255958 | 112287415 | 31458  | 4  | 3 | 4 | 0.06713722 | 0.10122019 | 6 | 4 | 0.44141547 | 0.30102999 |
| chr13 | 112287415 | 112287474 | 60     | 1  | 4 | 3 | 0.03812622 | 0.10122019 | 7 | 4 | 0.60763643 | 0.30102999 |
| chr13 | 112287474 | 112330789 | 43316  | 1  | 4 | 3 | 0.06713722 | 0.10122019 | 6 | 4 | 0.44141547 | 0.30102999 |
| chr13 | 112330789 | 112580684 | 249896 | 2  | 4 | 3 | 0.11390336 | 0.10122019 | 5 | 4 | 0.30102999 | 0.30102999 |
| chr13 | 112580684 | 112580743 | 60     | 1  | 4 | 4 | 0.11390336 | 0.18734596 | 5 | 4 | 0.30102999 | 0.18734596 |
| chr13 | 112580743 | 112639854 | 59112  | 1  | 4 | 3 | 0.11390336 | 0.10122019 | 5 | 4 | 0.30102999 | 0.30102999 |
| chr13 | 112639854 | 112725394 | 85541  | 1  | 4 | 2 | 0.11390336 | 0.0429175  | 5 | 4 | 0.30102999 | 0.47744371 |
| chr13 | 112725394 | 112725453 | 60     | 1  | 4 | 2 | 0.06713722 | 0.0429175  | 6 | 4 | 0.44141547 | 0.47744371 |
| chr13 | 112725453 | 112873845 | 148393 | 2  | 4 | 2 | 0.11390336 | 0.0429175  | 5 | 4 | 0.30102999 | 0.47744371 |
| chr13 | 112873845 | 112930111 | 56267  | 2  | 4 | 2 | 0.06713722 | 0.02162467 | 5 | 5 | 0.44141547 | 0.68214471 |
| chr13 | 112930111 | 112930170 | 60     | 1  | 4 | 2 | 0.03812622 | 0.02162467 | 7 | 5 | 0.60763643 | 0.68214471 |
| chr13 | 112930170 | 113172605 | 242436 | 5  | 4 | 2 | 0.11390336 | 0.0429175  | 5 | 4 | 0.30102999 | 0.47744371 |
| chr13 | 113172605 | 113219453 | 46849  | 2  | 4 | 2 | 0.06713722 | 0.0429175  | 6 | 4 | 0.44141547 | 0.47744371 |
| chr13 | 113219453 | 113328793 | 109341 | 3  | 4 | 3 | 0.03812622 | 0.10122019 | 7 | 4 | 0.60763643 | 0.30102999 |
| chr13 | 113328793 | 113362837 | 34045  | 2  | 4 | 3 | 0.03812622 | 0.11390336 | 7 | 5 | 0.60763643 | 0.30102999 |
| chr13 | 113362837 | 113413159 | 50233  | 1  | 4 | 4 | 0.06713722 | 0.11390336 | 6 | 5 | 0.44141547 | 0.30102999 |
| chr13 | 113413159 | 113469872 | 56714  | 1  | 4 | 4 | 0.11390336 | 0.11390336 | 5 | 5 | 0.30102999 | 0.30102999 |
| chr13 | 113469872 | 113538560 | 68689  | 2  | 4 | 4 | 0.06713722 | 0.11390336 | 6 | 5 | 0.44141547 | 0.30102999 |
| chr13 | 113538560 | 113562712 | 24153  | 2  | 4 | 4 | 0.06713722 | 0.06713722 | 6 | 6 | 0.44141547 | 0.44141547 |
| chr13 | 113562712 | 113868734 | 306023 | 12 | 4 | 4 | 0.11390336 | 0.06713722 | 5 | 6 | 0.30102999 | 0.44141547 |
| chr13 | 113868734 | 113907463 | 38730  | 1  | 4 | 4 | 0.11390336 | 0.11390336 | 5 | 5 | 0.30102999 | 0.30102999 |
| chr13 | 113907463 | 113939062 | 31600  | 2  | 5 | 4 | 0.19510895 | 0.11390336 | 5 | 5 | 0.19510895 | 0.30102999 |
| chr13 | 113939062 | 113985009 | 29548  | 2  | 5 | 4 | 0.19510895 | 0.12309572 | 5 | 6 | 0.19510895 | 0.44141547 |
| chr13 | 113985009 | 113988959 | 23951  | 5  | 5 | 5 | 0.19510895 | 0.12309572 | 5 | 5 | 0.19510895 | 0.30102999 |
| chr13 | 113988959 | 114053469 | 64511  | 2  | 5 | 4 | 0.19510895 | 0.06713722 | 5 | 6 | 0.19510895 | 0.44141547 |
| chr13 | 114053469 | 114053528 | 60     | 1  | 5 | 5 | 0.19510895 | 0.12309572 | 5 | 6 | 0.19510895 | 0.30102999 |
| chr13 | 114053528 | 114137698 | 84171  | 3  | 5 | 4 | 0.19510895 | 0.06713722 | 5 | 6 | 0.19510895 | 0.44141547 |
| chr13 | 114137698 | 114196931 | 59234  | 3  | 5 | 5 | 0.19510895 | 0.12309572 | 5 | 6 | 0.19510895 | 0.30102999 |
| chr13 | 114196931 | 114303365 | 106435 | 5  | 4 | 4 | 0.11390336 | 0.11390336 | 5 | 5 | 0.30102999 | 0.30102999 |
| chr13 | 114303365 | 114325791 | 22427  | 2  | 5 | 4 | 0.19510895 | 0.11390336 | 5 | 5 | 0.19510895 | 0.30102999 |
| chr13 | 114325791 | 114528702 | 202912 | 3  | 5 | 4 | 0.30102999 | 0.11390336 | 4 | 5 | 0.11390336 | 0.30102999 |
| chr13 | 114528702 | 114581618 | 52917  | 1  | 4 | 4 | 0.30102999 | 0.18734596 | 4 | 4 | 0.11390336 | 0.18734596 |
| chr13 | 114581618 | 114581677 | 60     | 1  | 5 | 4 | 0.30102999 | 0.11390336 | 5 | 4 | 0.11390336 | 0.30102999 |
| chr13 | 114581677 | 114834248 | 252572 | 3  | 4 | 4 | 0.18734596 | 0.11390336 | 4 | 5 | 0.18734596 | 0.30102999 |
| chr13 | 114834248 | 114886806 | 52559  | 2  | 4 | 4 | 0.30102999 | 0.30102999 | 3 | 3 | 0.10122019 | 0.10122019 |
| chr13 | 114886806 | 114886865 | 60     | 1  | 4 | 4 | 0.30102999 | 0.18734596 | 3 | 4 | 0.10122019 | 0.18734596 |
| chr13 | 114886865 | 114946264 | 59400  | 1  | 3 | 3 | 0.30102999 | 0.17593012 | 2 | 3 | 0.08289318 | 0.17593012 |
| chr13 | 114946264 | 115011448 | 65185  | 1  | 2 | 3 | 0.30102999 | 0.17593012 | 1 | 3 | 0.05404976 | 0.17593012 |
| chr13 | 115011448 | 115011507 | 60     | 1  | 2 | 4 | 0.30102999 | 0.30102999 | 1 | 3 | 0.05404976 | 0.10122019 |
| chr13 | 115011507 | 115059020 | 47514  | 1  | 2 | 2 | 0.30102999 | 0.08289318 | 1 | 3 | 0.05404976 | 0.30102999 |
| chr14 | 20253739  | 20338743  | 85005  | 2  | 1 | 4 | 0.05404976 | 0.30102999 | 2 | 3 | 0.30102999 | 0.10122019 |
| chr14 | 20338743  | 20472548  | 133806 | 3  | 1 | 4 | 0.05404976 | 0.18734596 | 2 | 4 | 0.30102999 | 0.18734596 |
| chr14 | 20472548  | 20472607  | 60     | 1  | 2 | 5 | 0.1575501  | 0.12309572 | 2 | 6 | 0.1575501  | 0.30102999 |
| chr14 | 20472607  | 20582059  | 109453 | 2  | 0 | 5 | 0.12309572 | 0.12309572 | 2 | 6 | 0.61140001 | 0.30102999 |
| chr14 | 20582059  | 20727096  | 145038 | 4  | 1 | 5 | 0.05404976 | 0.07511598 | 2 | 7 | 0.3        |            |

|       |          |          |        |    |   |   |            |            |    |    |            |            |
|-------|----------|----------|--------|----|---|---|------------|------------|----|----|------------|------------|
| chr14 | 22866736 | 22888863 | 22528  | 2  | 1 | 3 | 0.01091641 | 0.0079614  | 4  | 8  | 0.76005302 | 1.07548421 |
| chr14 | 22888863 | 22964864 | 76002  | 1  | 1 | 3 | 0.02438896 | 0.0079614  | 3  | 8  | 0.51676182 | 1.07548421 |
| chr14 | 22964864 | 23016539 | 51676  | 2  | 1 | 4 | 0.02438896 | 0.02074938 | 3  | 8  | 0.51676182 | 0.79906872 |
| chr14 | 23016539 | 23072300 | 55762  | 1  | 1 | 5 | 0.02438896 | 0.02473314 | 3  | 9  | 0.51676182 | 0.76806864 |
| chr14 | 23072300 | 23083325 | 11026  | 2  | 1 | 6 | 0.02438896 | 0.02793176 | 3  | 10 | 0.51676182 | 0.74627054 |
| chr14 | 23083325 | 23237648 | 154324 | 1  | 1 | 5 | 0.02438896 | 0.02473314 | 3  | 9  | 0.51676182 | 0.76806864 |
| chr14 | 23237648 | 23284108 | 46461  | 2  | 1 | 4 | 0.02438896 | 0.01077081 | 3  | 9  | 0.51676182 | 1.01542894 |
| chr14 | 23284108 | 23315758 | 31651  | 5  | 1 | 5 | 0.02438896 | 0.02473314 | 3  | 9  | 0.51676182 | 0.76806864 |
| chr14 | 23315758 | 23440697 | 124940 | 8  | 4 | 4 | 0.02438896 | 0.01077081 | 3  | 9  | 0.51676182 | 1.01542894 |
| chr14 | 23440697 | 23522469 | 81773  | 3  | 1 | 3 | 0.02438896 | 0.00378107 | 3  | 9  | 0.51676182 | 1.33111237 |
| chr14 | 23522469 | 23541735 | 19267  | 1  | 1 | 3 | 0.05404976 | 0.00378107 | 2  | 9  | 0.30102999 | 1.33111237 |
| chr14 | 23541735 | 23541794 | 60     | 1  | 1 | 5 | 0.05404976 | 0.02473314 | 2  | 9  | 0.30102999 | 0.76806864 |
| chr14 | 23541794 | 23565233 | 23440  | 1  | 1 | 4 | 0.05404976 | 0.01077081 | 2  | 9  | 0.30102999 | 1.01542894 |
| chr14 | 23565233 | 23586579 | 21347  | 2  | 1 | 6 | 0.05404976 | 0.04875589 | 2  | 9  | 0.30102999 | 0.5732208  |
| chr14 | 23586579 | 23619849 | 33271  | 1  | 1 | 5 | 0.05404976 | 0.02473314 | 2  | 9  | 0.30102999 | 0.76806864 |
| chr14 | 23619849 | 23652231 | 32383  | 1  | 1 | 4 | 0.05404976 | 0.01077081 | 2  | 9  | 0.30102999 | 1.01542894 |
| chr14 | 23652231 | 23652290 | 60     | 1  | 1 | 5 | 0.02438896 | 0.02473314 | 3  | 9  | 0.51676182 | 0.76806864 |
| chr14 | 23652290 | 23734420 | 82131  | 1  | 1 | 5 | 0.05404976 | 0.02473314 | 2  | 9  | 0.30102999 | 0.76806864 |
| chr14 | 23734420 | 23754227 | 19808  | 2  | 1 | 6 | 0.05404976 | 0.02793176 | 10 | 10 | 0.30102999 | 0.74627054 |
| chr14 | 23754227 | 23776812 | 22586  | 1  | 1 | 6 | 0.05404976 | 0.00778066 | 12 | 12 | 0.30102999 | 1.17038931 |
| chr14 | 23776812 | 23793946 | 17135  | 1  | 1 | 6 | 0.05404976 | 0.01518174 | 2  | 11 | 0.30102999 | 0.84496989 |
| chr14 | 23793946 | 23865630 | 91685  | 7  | 1 | 6 | 0.02438896 | 0.01518174 | 3  | 11 | 0.51676182 | 0.84496989 |
| chr14 | 23865630 | 24035987 | 150358 | 5  | 1 | 6 | 0.02438896 | 0.00778066 | 12 | 12 | 0.51676182 | 1.17038931 |
| chr14 | 24035987 | 24136331 | 100345 | 2  | 1 | 5 | 0.02438896 | 0.00666883 | 3  | 11 | 0.51676182 | 1.20557682 |
| chr14 | 24136331 | 24269239 | 132909 | 1  | 1 | 4 | 0.02438896 | 0.00247414 | 3  | 11 | 0.51676182 | 1.52371709 |
| chr14 | 24269239 | 24612989 | 343751 | 12 | 1 | 4 | 0.05404976 | 0.00247414 | 2  | 11 | 0.30102999 | 1.52371709 |
| chr14 | 24612989 | 24841199 | 228211 | 26 | 1 | 4 | 0.05404976 | 0.00530919 | 2  | 10 | 0.30102999 | 1.25681219 |
| chr14 | 24841199 | 24841258 | 60     | 1  | 1 | 4 | 0.05404976 | 0.00247414 | 2  | 11 | 0.30102999 | 1.52371709 |
| chr14 | 24841258 | 25042729 | 201472 | 5  | 1 | 4 | 0.1218695  | 0.00247414 | 1  | 11 | 0.1218695  | 1.52371709 |
| chr14 | 25042729 | 25103048 | 60320  | 4  | 1 | 4 | 0.05404976 | 0.00247414 | 2  | 11 | 0.30102999 | 1.52371709 |
| chr14 | 25103048 | 25279019 | 175972 | 2  | 1 | 4 | 0.1218695  | 0.00247414 | 1  | 11 | 0.1218695  | 1.52371709 |
| chr14 | 25279019 | 25325315 | 46297  | 1  | 1 | 4 | 0.30102999 | 0.00247414 | 0  | 11 | 0          | 1.52371709 |
| chr14 | 25325315 | 25347894 | 22580  | 1  | 1 | 4 | 0.30102999 | 0.00530919 | 0  | 10 | 0          | 1.25681219 |
| chr14 | 25347894 | 25370166 | 22273  | 2  | 1 | 4 | 0.05404976 | 0.00530919 | 2  | 10 | 0.30102999 | 1.25681219 |
| chr14 | 25370166 | 25479710 | 109545 | 3  | 1 | 4 | 0.1218695  | 0.00530919 | 1  | 10 | 0.1218695  | 1.25681219 |
| chr14 | 25479710 | 25522121 | 42412  | 2  | 1 | 4 | 0.05404976 | 0.00247414 | 2  | 11 | 0.30102999 | 1.52371709 |
| chr14 | 25522121 | 25843560 | 321440 | 2  | 0 | 2 | 0          | 0.01053319 | 1  | 6  | 0.30102999 | 0.91219088 |
| chr14 | 25843560 | 25843619 | 60     | 1  | 0 | 2 | 0          | 0.00493743 | 1  | 7  | 0.30102999 | 1.16581773 |
| chr14 | 25843619 | 25977924 | 134306 | 1  | 0 | 1 | 0          | 0.00204627 | 1  | 6  | 0.30102999 | 1.31360226 |
| chr14 | 25977924 | 26171903 | 193980 | 1  | 0 | 1 | 0          | 0.00478973 | 1  | 5  | 0.30102999 | 1.02643191 |
| chr14 | 26171903 | 26171962 | 60     | 1  | 0 | 2 | 0          | 0.00493743 | 1  | 7  | 0.30102999 | 1.16581773 |
| chr14 | 26171962 | 26277895 | 105934 | 0  | 0 | 2 | 0          | 0.01053319 | 1  | 6  | 0.30102999 | 0.91219088 |
| chr14 | 26277895 | 26331619 | 53725  | 1  | 0 | 2 | 0          | 0.0429175  | 1  | 4  | 0.30102999 | 0.47744371 |
| chr14 | 26331619 | 26524655 | 193037 | 1  | 0 | 2 | 0          | 0.0828918  | 1  | 3  | 0.30102999 | 0.30102999 |
| chr14 | 26524655 | 26689372 | 164718 | 3  | 0 | 3 | 0          | 0.17593012 | 1  | 3  | 0.30102999 | 0.17593012 |
| chr14 | 26689372 | 26809539 | 120168 | 2  | 0 | 3 | 0          | 0.03070643 | 1  | 6  | 0.30102999 | 0.63695542 |
| chr14 | 26809539 | 26809598 | 60     | 1  | 0 | 5 | 0          | 0.07511598 | 1  | 7  | 0.30102999 | 0.43181735 |
| chr14 | 26809598 | 26915553 | 105956 | 1  | 0 | 5 | 0          | 0.12309572 | 1  | 6  | 0.30102999 | 0.30102999 |
| chr14 | 26915553 | 27188633 | 273081 | 6  | 0 | 5 | 0          | 0.19510895 | 1  | 5  | 0.30102999 | 0.19510895 |
| chr14 | 27188633 | 27538931 | 350299 | 4  | 1 | 5 | 0.1218695  | 0.19510895 | 1  | 5  | 0.1218695  | 0.19510895 |
| chr14 | 27538931 | 27681623 | 142693 | 1  | 1 | 4 | 0.1218695  | 0.11390336 | 1  | 5  | 0.1218695  | 0.30102999 |
| chr14 | 27681623 | 27838972 | 157350 | 2  | 0 | 4 | 0          | 0.11390336 | 1  | 5  | 0.30102999 | 0.30102999 |
| chr14 | 27838972 | 27948078 | 109107 | 2  | 1 | 4 | 0.30102999 | 0.11390336 | 1  | 5  | 0.30102999 | 0.30102999 |
| chr14 | 27948078 | 27948137 | 60     | 1  | 1 | 5 | 0.30102999 | 0.19510895 | 1  | 5  | 0.30102999 | 0.19510895 |
| chr14 | 27948137 | 28022377 | 74241  | 1  | 1 | 2 | 0.30102999 | 0.02162467 | 0  | 5  | 0          | 0.68214471 |
| chr14 | 28022377 | 28022436 | 60     | 1  | 1 | 3 | 0.30102999 | 0.05670724 | 0  | 5  | 0          | 0.45545077 |
| chr14 | 28022436 | 28179861 | 157426 | 2  | 1 | 2 | 0.30102999 | 0.02162467 | 0  | 5  | 0          | 0.68214471 |
| chr14 | 28179861 | 28179920 | 60     | 1  | 1 | 3 | 0.30102999 | 0.05670724 | 0  | 5  | 0          | 0.45545077 |
| chr14 | 28179920 | 28339878 | 159959 | 1  | 0 | 3 | 0          | 0.05670724 | 0  | 5  | 0          | 0.45545077 |
| chr14 | 28339878 | 28625754 | 285877 | 3  | 0 | 4 | 0          | 0.06713722 | 0  | 6  | 0          | 0.44141547 |
| chr14 | 28625754 | 28843860 | 218107 | 0  | 0 | 5 | 0          | 0.12309572 | 0  | 6  | 0          | 0.30102999 |
| chr14 | 28843860 | 29147613 | 303754 | 2  | 0 | 4 | 0          | 0.06713722 | 0  | 6  | 0          | 0.44141547 |
| chr14 | 29147613 | 29238783 | 91171  | 3  | 0 | 5 | 0          | 0.07511598 | 0  | 7  | 0          | 0.43181735 |
| chr14 | 29238783 | 29258618 | 19836  | 2  | 0 | 7 | 0          | 0.20469099 | 0  | 7  | 0          | 0.20469099 |
| chr14 | 29258618 | 29305481 | 46864  | 1  | 0 | 6 | 0          | 0.11390336 | 0  | 7  | 0          | 0.30102999 |
| chr14 | 29305481 | 29305540 | 60     | 1  | 0 | 6 | 0          | 0.20469099 | 0  | 7  | 0          | 0.20469099 |
| chr14 | 29305540 | 29440952 | 135413 | 1  | 0 | 6 | 0          | 0.129913   | 0  | 7  | 0          | 0.30102999 |
| chr14 | 29440952 | 29615090 | 174139 | 1  | 0 | 6 | 0          | 0.20064824 | 0  | 7  | 0          | 0.20064824 |
| chr14 | 29615090 | 29615149 | 60     | 1  | 0 | 8 | 0          | 0.4250187  | 0  | 6  | 0          | 0.08126216 |
| chr14 | 29615149 | 29864986 | 249828 | 1  | 0 | 7 | 0          | 0.30102999 | 0  | 6  | 0          | 0.129913   |
| chr14 | 29864986 | 29938629 | 73644  | 3  | 0 | 7 | 0          | 0.30102999 | 0  | 6  | 0.6114001  | 0.129913   |
| chr14 | 29938629 | 30046219 | 107591 | 1  | 0 | 6 | 0          | 0.20064824 | 1  | 6  | 0.30102999 | 0.20064824 |
| chr14 | 30046219 | 30137695 | 91477  | 3  | 0 | 6 | 0          | 0.129913   | 1  | 7  | 0.30102999 | 0.30102999 |
| chr14 | 30137695 | 30230812 | 93118  | 2  | 0 | 5 | 0          | 0.07511598 | 1  | 7  | 0.30102999 | 0.43181735 |
| chr14 | 30230812 | 30303024 | 72213  | 2  | 0 | 5 | 0          | 0.19510895 | 1  | 5  | 0.30102999 | 0.19510895 |
| chr14 | 30303024 | 30303083 | 60     | 1  | 0 | 5 | 0          | 0.19510895 | 2  | 5  | 0.6114001  | 0.19510895 |
| chr14 | 30303083 | 30376034 | 72952  | 2  | 0 | 5 | 0          | 0.19510895 | 1  | 5  | 0.30102999 | 0.19510895 |
| chr14 | 30376034 | 30376093 | 60     | 1  | 0 | 5 | 0          | 0.12309572 | 6  | 6  | 0.6114001  | 0.30102999 |
| chr14 | 30376093 | 30503806 | 127714 | 2  | 0 | 5 | 0          | 0.19510895 | 1  | 5  | 0.30102999 | 0.19510895 |
| chr14 | 30503806 | 30551406 | 47601  | 2  | 0 | 5 | 0          | 0.07511598 | 2  | 7  | 0.6114001  | 0.43181735 |
| chr14 | 30551406 | 30697376 | 145971 | 2  | 0 | 5 | 0          | 0.19510895 | 2  | 5  | 0.6114001  | 0.19510895 |
| chr14 | 30697376 | 30780774 | 83399  | 2  | 0 | 6 | 0          | 0.129913   | 2  | 7  | 0.6114001  | 0.30102999 |
| chr14 | 30780774 | 30780833 | 60     | 1  | 1 | 6 | 0.05404976 | 0.129913   | 2  | 7  | 0.30102999 | 0.30102999 |
| chr14 | 30780833 | 30970103 | 189271 | 1  | 1 | 6 | 0.05404976 | 0.20064824 | 2  | 6  | 0.30102999 | 0.20064824 |
| chr14 | 30970103 | 31139520 | 169418 | 4  | 1 | 7 | 0.02438896 | 0.20469099 | 3  | 7  | 0.51676182 | 0.20469099 |
| chr14 | 31139520 | 31139579 | 60     | 1  | 1 | 7 | 0.02438896 | 0.13499366 | 8  | 8  | 0.51676182 | 0.30102999 |
| chr14 | 31139579 | 31170298 | 30720  | 1  | 1 | 7 | 0.02438896 | 0.20469099 | 3  | 7  | 0.51676182 | 0.20469099 |
| chr14 | 31170298 | 31290068 | 119771 | 2  | 1 | 7 | 0.05404976 | 0.20469099 | 2  | 7  | 0.30102999 | 0.20469099 |
| chr14 | 31290068 | 31290127 | 60     | 1  | 1 | 7 | 0.05404976 | 0.08584816 | 2  | 9  | 0.30102999 | 0.42015402 |
| chr14 | 31290127 | 31405702 | 115576 | 2  | 1 | 6 | 0.05404976 | 0.129913   | 2  | 7  | 0.30102999 | 0.30102999 |
| chr14 | 31405702 | 31574592 | 168891 | 6  | 1 | 6 | 0.02438896 | 0.129913   | 3  | 7  | 0.51676182 | 0.30102999 |
| chr14 | 31574592 | 31605930 | 31339  | 2  | 1 | 6 | 0.02438896 | 0.08122616 | 8  | 8  | 0.51676182 | 0.4250187  |
| chr14 | 31605930 | 31732058 | 126129 | 3  | 1 | 6 | 0.02438896 | 0.12       |    |    |            |            |

|       |          |          |        |   |   |   |            |            |   |   |            |            |
|-------|----------|----------|--------|---|---|---|------------|------------|---|---|------------|------------|
| chr14 | 33756873 | 33974276 | 217404 | 4 | 1 | 6 | 0.05404976 | 0.30102999 | 2 | 5 | 0.30102999 | 0.12309572 |
| chr14 | 33974276 | 34117159 | 142884 | 4 | 1 | 7 | 0.05404976 | 0.43181735 | 2 | 5 | 0.30102999 | 0.07511598 |
| chr14 | 34117159 | 34207073 | 89915  | 2 | 1 | 6 | 0.05404976 | 0.30102999 | 2 | 5 | 0.30102999 | 0.12309572 |
| chr14 | 34207073 | 34247716 | 40644  | 1 | 1 | 6 | 0.05404976 | 0.20064824 | 2 | 6 | 0.30102999 | 0.20064824 |
| chr14 | 34247716 | 34316382 | 68667  | 2 | 1 | 4 | 0.05404976 | 0.06713722 | 2 | 6 | 0.30102999 | 0.44141547 |
| chr14 | 34316382 | 34402593 | 86212  | 1 | 1 | 3 | 0.1218695  | 0.03070643 | 1 | 6 | 0.1218695  | 0.63695542 |
| chr14 | 34402593 | 34487659 | 85067  | 1 | 1 | 3 | 0.1218695  | 0.05670724 | 1 | 5 | 0.1218695  | 0.45545077 |
| chr14 | 34487659 | 34487718 | 60     | 1 | 1 | 4 | 0.1218695  | 0.06713722 | 1 | 6 | 0.1218695  | 0.44141547 |
| chr14 | 34487718 | 34670399 | 182682 | 2 | 1 | 4 | 0.1218695  | 0.18734596 | 1 | 4 | 0.1218695  | 0.18734596 |
| chr14 | 34670399 | 34670458 | 60     | 1 | 1 | 4 | 0.05404976 | 0.03812622 | 2 | 7 | 0.30102999 | 0.60763643 |
| chr14 | 34670458 | 34872998 | 202541 | 2 | 1 | 4 | 0.05404976 | 0.06713722 | 2 | 6 | 0.30102999 | 0.44141547 |
| chr14 | 34872998 | 34873057 | 60     | 1 | 1 | 4 | 0.05404976 | 0.02074938 | 2 | 8 | 0.30102999 | 0.79906872 |
| chr14 | 34873057 | 34993967 | 120911 | 3 | 1 | 4 | 0.05404976 | 0.06713722 | 2 | 6 | 0.30102999 | 0.44141547 |
| chr14 | 34993967 | 35072706 | 78740  | 1 | 0 | 4 | 0          | 0.06713722 | 2 | 6 | 0.61140001 | 0.44141547 |
| chr14 | 35072706 | 35095504 | 22799  | 2 | 0 | 4 | 0          | 0.3812622  | 2 | 7 | 0.61140001 | 0.60763643 |
| chr14 | 35095504 | 35095563 | 60     | 1 | 1 | 5 | 0.05404976 | 0.04407651 | 2 | 8 | 0.30102999 | 0.58747015 |
| chr14 | 35095563 | 35150642 | 55080  | 1 | 1 | 4 | 0.05404976 | 0.02074938 | 2 | 8 | 0.30102999 | 0.79906872 |
| chr14 | 35150642 | 35181696 | 31055  | 1 | 1 | 4 | 0.1218695  | 0.06713722 | 1 | 6 | 0.1218695  | 0.44141547 |
| chr14 | 35181696 | 35255109 | 73414  | 2 | 1 | 4 | 0.1218695  | 0.11390336 | 1 | 5 | 0.1218695  | 0.30102999 |
| chr14 | 35255109 | 35295327 | 40219  | 1 | 0 | 4 | 0          | 0.11390336 | 1 | 5 | 0.30102999 | 0.30102999 |
| chr14 | 35295327 | 35295386 | 60     | 1 | 0 | 4 | 0          | 0.03812622 | 1 | 7 | 0.30102999 | 0.60763643 |
| chr14 | 35295386 | 35455997 | 170611 | 3 | 4 | 0 | 0          | 0.06713722 | 3 | 4 | 0.44141547 | 0.44141547 |
| chr14 | 35455997 | 35593987 | 127991 | 5 | 0 | 4 | 0          | 0.11390336 | 5 | 5 | 0.30102999 | 0.30102999 |
| chr14 | 35593987 | 35620232 | 26246  | 1 | 1 | 4 | 0.1218695  | 0.11390336 | 1 | 5 | 0.1218695  | 0.30102999 |
| chr14 | 35620232 | 35649937 | 29706  | 1 | 0 | 4 | 0          | 0.11390336 | 1 | 5 | 0.30102999 | 0.30102999 |
| chr14 | 35649937 | 35709374 | 59438  | 1 | 0 | 4 | 0          | 0.18734596 | 1 | 4 | 0.30102999 | 0.18734596 |
| chr14 | 35709374 | 35780664 | 71291  | 3 | 1 | 4 | 0.1218695  | 0.18734596 | 1 | 4 | 0.1218695  | 0.18734596 |
| chr14 | 35780664 | 35780723 | 60     | 1 | 1 | 4 | 0.1218695  | 0.11390336 | 1 | 5 | 0.30102999 | 0.30102999 |
| chr14 | 35780723 | 35870998 | 90276  | 1 | 1 | 3 | 0.1218695  | 0.05670724 | 1 | 5 | 0.1218695  | 0.45545077 |
| chr14 | 35870998 | 35872162 | 1165   | 3 | 1 | 4 | 0.1218695  | 0.03812622 | 1 | 7 | 0.1218695  | 0.60763643 |
| chr14 | 35872162 | 35983284 | 111123 | 1 | 1 | 4 | 0.1218695  | 0.06713722 | 1 | 6 | 0.1218695  | 0.44141547 |
| chr14 | 35983284 | 35983343 | 60     | 1 | 1 | 4 | 0.1218695  | 0.03812622 | 1 | 7 | 0.1218695  | 0.60763643 |
| chr14 | 35983343 | 36077359 | 93017  | 3 | 1 | 4 | 0.1218695  | 0.11390336 | 1 | 5 | 0.1218695  | 0.30102999 |
| chr14 | 36077359 | 36190574 | 113216 | 3 | 1 | 5 | 0.1218695  | 0.04407651 | 1 | 8 | 0.1218695  | 0.58747015 |
| chr14 | 36190574 | 36190633 | 60     | 1 | 1 | 6 | 0.1218695  | 0.08122616 | 1 | 8 | 0.1218695  | 0.4250187  |
| chr14 | 36190633 | 36337142 | 146510 | 3 | 1 | 6 | 0.1218695  | 0.129913   | 1 | 7 | 0.1218695  | 0.30102999 |
| chr14 | 36337142 | 36337201 | 60     | 1 | 1 | 6 | 0.1218695  | 0.08122616 | 1 | 8 | 0.1218695  | 0.4250187  |
| chr14 | 36337201 | 36582477 | 245277 | 2 | 1 | 6 | 0.1218695  | 0.129913   | 2 | 7 | 0.1218695  | 0.30102999 |
| chr14 | 36582477 | 36660897 | 78421  | 1 | 0 | 6 | 0          | 0.129913   | 1 | 7 | 0.30102999 | 0.30102999 |
| chr14 | 36660897 | 36747497 | 86601  | 2 | 0 | 7 | 0          | 0.13499366 | 1 | 8 | 0.30102999 | 0.30102999 |
| chr14 | 36747497 | 36774197 | 26701  | 2 | 0 | 7 | 0          | 0.08584816 | 1 | 9 | 0.30102999 | 0.42015402 |
| chr14 | 36774197 | 36924172 | 149976 | 4 | 0 | 7 | 0          | 0.13499366 | 4 | 9 | 0.30102999 | 0.30102999 |
| chr14 | 36924172 | 37002712 | 78541  | 2 | 1 | 7 | 0.1218695  | 0.08584816 | 1 | 9 | 0.1218695  | 0.42015402 |
| chr14 | 37002712 | 37146111 | 143400 | 6 | 1 | 7 | 0.1218695  | 0.20469099 | 1 | 7 | 0.1218695  | 0.20469099 |
| chr14 | 37146111 | 37184644 | 38534  | 1 | 1 | 7 | 0.1218695  | 0.30102999 | 1 | 6 | 0.1218695  | 0.129913   |
| chr14 | 37184644 | 37242180 | 57537  | 2 | 2 | 7 | 0.30102999 | 0.30102999 | 1 | 6 | 0.05404976 | 0.129913   |
| chr14 | 37242180 | 37401127 | 158948 | 3 | 2 | 6 | 0.30102999 | 0.30102999 | 1 | 5 | 0.05404976 | 0.12309572 |
| chr14 | 37401127 | 37443737 | 42611  | 2 | 2 | 6 | 0.30102999 | 0.20064824 | 1 | 6 | 0.05404976 | 0.20064824 |
| chr14 | 37443737 | 37642899 | 199163 | 4 | 2 | 7 | 0.30102999 | 0.20469099 | 1 | 7 | 0.05404976 | 0.20469099 |
| chr14 | 37642899 | 37777651 | 134753 | 5 | 2 | 7 | 0.30102999 | 0.13499366 | 1 | 8 | 0.05404976 | 0.30102999 |
| chr14 | 37777651 | 37777710 | 60     | 1 | 1 | 3 | 0.51676182 | 0.13499366 | 1 | 8 | 0.05404976 | 0.30102999 |
| chr14 | 37777710 | 37892109 | 114400 | 2 | 1 | 7 | 0.1218695  | 0.13499366 | 1 | 8 | 0.1218695  | 0.30102999 |
| chr14 | 37892109 | 37923108 | 31000  | 2 | 2 | 7 | 0.30102999 | 0.13499366 | 1 | 8 | 0.05404976 | 0.30102999 |
| chr14 | 37923108 | 38017138 | 94031  | 2 | 1 | 7 | 0.1218695  | 0.20469099 | 1 | 7 | 0.1218695  | 0.20469099 |
| chr14 | 38017138 | 38017197 | 60     | 1 | 1 | 2 | 0.30102999 | 0.13499366 | 1 | 8 | 0.05404976 | 0.30102999 |
| chr14 | 38017197 | 38059397 | 42201  | 1 | 2 | 7 | 0.30102999 | 0.08122616 | 1 | 8 | 0.05404976 | 0.4250187  |
| chr14 | 38059397 | 38062732 | 3336   | 3 | 3 | 6 | 0.51676182 | 0.08122616 | 1 | 8 | 0.05404976 | 0.4250187  |
| chr14 | 38062732 | 38115908 | 53177  | 1 | 2 | 6 | 0.30102999 | 0.08122616 | 1 | 8 | 0.05404976 | 0.4250187  |
| chr14 | 38115908 | 38168425 | 52518  | 1 | 2 | 6 | 0.30102999 | 0.20064824 | 1 | 6 | 0.05404976 | 0.20064824 |
| chr14 | 38168425 | 38220333 | 51909  | 1 | 2 | 5 | 0.30102999 | 0.12309572 | 1 | 6 | 0.05404976 | 0.30102999 |
| chr14 | 38220333 | 38346804 | 126472 | 2 | 2 | 4 | 0.30102999 | 0.06713722 | 1 | 6 | 0.05404976 | 0.44141547 |
| chr14 | 38346804 | 38346863 | 60     | 1 | 2 | 4 | 0.30102999 | 0.03812622 | 1 | 7 | 0.05404976 | 0.60763643 |
| chr14 | 38346863 | 38428518 | 81656  | 1 | 2 | 4 | 0.30102999 | 0.06713722 | 1 | 6 | 0.05404976 | 0.44141547 |
| chr14 | 38428518 | 38583707 | 155190 | 2 | 1 | 4 | 0.1218695  | 0.11390336 | 1 | 5 | 0.1218695  | 0.30102999 |
| chr14 | 38583707 | 38583766 | 60     | 1 | 1 | 5 | 0.1218695  | 0.11390336 | 1 | 6 | 0.1218695  | 0.30102999 |
| chr14 | 38583766 | 38676513 | 92750  | 1 | 4 | 4 | 0.1218695  | 0.11390336 | 1 | 5 | 0.1218695  | 0.30102999 |
| chr14 | 38676513 | 38681943 | 5429   | 2 | 2 | 5 | 0.30102999 | 0.19510895 | 1 | 5 | 0.05404976 | 0.19510895 |
| chr14 | 38681943 | 38723471 | 41529  | 1 | 1 | 5 | 0.1218695  | 0.19510895 | 1 | 5 | 0.1218695  | 0.19510895 |
| chr14 | 38723471 | 38723530 | 60     | 1 | 1 | 6 | 0.1218695  | 0.20064824 | 1 | 6 | 0.1218695  | 0.20064824 |
| chr14 | 38723530 | 38881383 | 157854 | 1 | 1 | 6 | 0.1218695  | 0.30102999 | 1 | 5 | 0.1218695  | 0.12309572 |
| chr14 | 38881383 | 38881442 | 60     | 1 | 1 | 6 | 0.30102999 | 0.30102999 | 1 | 5 | 0.05404976 | 0.12309572 |
| chr14 | 38881442 | 39017462 | 136021 | 1 | 2 | 5 | 0.30102999 | 0.19510895 | 1 | 5 | 0.05404976 | 0.19510895 |
| chr14 | 39017462 | 39017521 | 60     | 1 | 1 | 5 | 0.30102999 | 0.12309572 | 1 | 6 | 0.05404976 | 0.30102999 |
| chr14 | 39017521 | 39218639 | 201119 | 1 | 1 | 5 | 0.30102999 | 0.12309572 | 1 | 5 | 0.05404976 | 0.30102999 |
| chr14 | 39218639 | 39218698 | 60     | 1 | 1 | 6 | 0.30102999 | 0.08122616 | 1 | 8 | 0          | 0.4250187  |
| chr14 | 39218698 | 39345313 | 126616 | 1 | 1 | 6 | 0.30102999 | 0.20064824 | 1 | 6 | 0          | 0.20064824 |
| chr14 | 39345313 | 39471773 | 126641 | 2 | 1 | 5 | 0.30102999 | 0.12309572 | 1 | 6 | 0          | 0.30102999 |
| chr14 | 39471773 | 39486109 | 14337  | 2 | 2 | 5 | 0.61140001 | 0.12309572 | 1 | 6 | 0          | 0.30102999 |
| chr14 | 39486109 | 39501872 | 15764  | 1 | 2 | 5 | 0.61140001 | 0.05670724 | 1 | 5 | 0          | 0.45545077 |
| chr14 | 39501872 | 39532526 | 30655  | 1 | 1 | 3 | 0.30102999 | 0.05670724 | 1 | 3 | 0          | 0.45545077 |
| chr14 | 39532526 | 39561844 | 29319  | 2 | 1 | 2 | 0.30102999 | 0.12309572 | 1 | 6 | 0          | 0.30102999 |
| chr14 | 39561844 | 39623388 | 61545  | 2 | 1 | 4 | 0.30102999 | 0.11390336 | 1 | 5 | 0          | 0.30102999 |
| chr14 | 39623388 | 39652133 | 28746  | 3 | 1 | 4 | 0.30102999 | 0.03812622 | 1 | 7 | 0          | 0.60763643 |
| chr14 | 39652133 | 39703308 | 51176  | 1 | 1 | 4 | 0.30102999 | 0.11390336 | 1 | 5 | 0          | 0.30102999 |
| chr14 | 39703308 | 39723119 | 19812  | 2 | 1 | 4 | 0.1218695  | 0.11390336 | 1 | 5 | 0.1218695  | 0.30102999 |
| chr14 | 39723119 | 39748443 | 25325  | 2 | 1 | 4 | 0.1218695  | 0.18734596 | 1 | 4 | 0.1218695  | 0.18734596 |
| chr14 | 39748443 | 40238278 | 489836 | 9 | 1 | 4 | 0.1218695  | 0.11390336 | 1 | 5 | 0.1218695  | 0.30102999 |
| chr14 | 40238278 | 40238337 | 60     | 1 | 1 | 5 | 0.1218695  | 0.12309572 | 1 | 6 | 0.1218695  | 0.30102999 |
| chr14 | 40238337 | 40343590 | 105254 | 1 | 1 | 5 | 0.30102999 | 0.12309572 | 1 | 6 | 0          | 0.30102999 |
| chr14 | 40343590 | 40503534 | 159945 | 1 | 1 | 3 | 0.30102999 | 0.05670724 | 1 | 5 | 0          | 0.45545077 |
| chr14 | 40503534 | 40591751 | 88218  | 1 | 1 | 3 | 0.30102999 | 0.17593012 | 1 | 3 | 0          | 0.17593012 |
| chr14 | 40591751 | 40591810 |        |   |   |   |            |            |   |   |            |            |



|       |          |          |        |    |   |   |            |            |   |    |            |            |
|-------|----------|----------|--------|----|---|---|------------|------------|---|----|------------|------------|
| chr14 | 46669990 | 46870334 | 200345 | 1  | 0 | 0 | 0          | 0          | 0 | 2  | 0          | 0.61140001 |
| chr14 | 46870334 | 46975576 | 105243 | 2  | 0 | 1 | 0          | 0.05404976 | 0 | 2  | 0          | 0.30102999 |
| chr14 | 46975576 | 46975635 | 60     | 1  | 0 | 4 | 0          | 0.30102999 | 0 | 3  | 0          | 0.1012019  |
| chr14 | 46975635 | 47119743 | 144109 | 1  | 0 | 3 | 0          | 0.17593012 | 0 | 3  | 0          | 0.17593012 |
| chr14 | 47119743 | 47119802 | 60     | 1  | 2 | 3 | 0.30102999 | 0.05670724 | 1 | 5  | 0.05404976 | 0.45545077 |
| chr14 | 47119802 | 47139314 | 19513  | 1  | 2 | 3 | 0.61140001 | 0.05670724 | 0 | 5  | 0          | 0.45545077 |
| chr14 | 47139314 | 47309970 | 170657 | 1  | 1 | 3 | 0.30102999 | 0.05670724 | 0 | 5  | 0          | 0.45545077 |
| chr14 | 47309970 | 47343304 | 33335  | 2  | 1 | 4 | 0.30102999 | 0.06713722 | 0 | 6  | 0          | 0.44141547 |
| chr14 | 47343304 | 47410524 | 67221  | 1  | 1 | 3 | 0.30102999 | 0.05670724 | 0 | 5  | 0          | 0.45545077 |
| chr14 | 47410524 | 47410583 | 60     | 1  | 1 | 3 | 0.30102999 | 0.03070643 | 0 | 6  | 0          | 0.63695542 |
| chr14 | 47410583 | 47478702 | 68120  | 1  | 1 | 3 | 0.30102999 | 0.05670724 | 0 | 5  | 0          | 0.45545077 |
| chr14 | 47478702 | 47520198 | 41497  | 2  | 1 | 4 | 0.1218695  | 0.06713722 | 1 | 6  | 0.1218695  | 0.44141547 |
| chr14 | 47520198 | 47637234 | 117037 | 2  | 1 | 3 | 0.30102999 | 0.05670724 | 0 | 5  | 0          | 0.45545077 |
| chr14 | 47637234 | 47637293 | 60     | 1  | 1 | 4 | 0.30102999 | 0.11390336 | 0 | 5  | 0          | 0.30102999 |
| chr14 | 47637293 | 47687365 | 50073  | 1  | 1 | 3 | 0.30102999 | 0.05670724 | 0 | 5  | 0          | 0.45545077 |
| chr14 | 47687365 | 47754197 | 66833  | 1  | 1 | 3 | 0.30102999 | 0.10122019 | 0 | 4  | 0          | 0.30102999 |
| chr14 | 47754197 | 47869160 | 114964 | 3  | 1 | 4 | 0.30102999 | 0.18734596 | 0 | 4  | 0          | 0.18734596 |
| chr14 | 47869160 | 47869219 | 60     | 1  | 1 | 4 | 0.30102999 | 0.03812622 | 0 | 7  | 0          | 0.60763643 |
| chr14 | 47869219 | 47955866 | 126648 | 2  | 1 | 4 | 0.30102999 | 0.18734596 | 0 | 4  | 0          | 0.18734596 |
| chr14 | 47955866 | 48159378 | 163513 | 5  | 1 | 5 | 0.30102999 | 0.12309572 | 0 | 6  | 0          | 0.30102999 |
| chr14 | 48159378 | 48159437 | 60     | 1  | 1 | 6 | 0.30102999 | 0.20064424 | 0 | 6  | 0          | 0.20064424 |
| chr14 | 48159437 | 48247954 | 88518  | 1  | 1 | 5 | 0.30102999 | 0.19510895 | 0 | 5  | 0          | 0.19510895 |
| chr14 | 48247954 | 48451202 | 203249 | 1  | 1 | 1 | 0.30102999 | 0.05404976 | 0 | 2  | 0          | 0.30102999 |
| chr14 | 48451202 | 48749012 | 297811 | 2  | 0 | 1 | 0          | 0.05404976 | 0 | 2  | 0          | 0.30102999 |
| chr14 | 48749012 | 48817641 | 68630  | 2  | 0 | 2 | 0          | 0.1575501  | 0 | 2  | 0          | 0.1575501  |
| chr14 | 48817641 | 48817700 | 60     | 1  | 0 | 2 | 0          | 0.08289318 | 0 | 3  | 0          | 0.30102999 |
| chr14 | 48817700 | 49196160 | 378461 | 2  | 0 | 1 | 0          | 0.02438996 | 0 | 3  | 0          | 0.51676182 |
| chr14 | 49196160 | 49196219 | 60     | 1  | 0 | 5 | 0          | 0.07511598 | 0 | 7  | 0          | 0.43181735 |
| chr14 | 49196219 | 49392169 | 195951 | 1  | 0 | 4 | 0          | 0.03812622 | 0 | 7  | 0          | 0.60763643 |
| chr14 | 49392169 | 49914400 | 522232 | 5  | 0 | 4 | 0.30102999 | 0.03812622 | 0 | 7  | 0          | 0.60763643 |
| chr14 | 49914400 | 50023820 | 109421 | 1  | 1 | 3 | 0.30102999 | 0.01598258 | 0 | 7  | 0          | 0.84395715 |
| chr14 | 50023820 | 50069148 | 45329  | 3  | 1 | 3 | 0.30102999 | 0.0079614  | 0 | 8  | 0          | 1.07548421 |
| chr14 | 50069148 | 50110208 | 41061  | 7  | 1 | 4 | 0.30102999 | 0.02074938 | 0 | 8  | 0          | 0.79906872 |
| chr14 | 50110208 | 50150290 | 40083  | 1  | 1 | 4 | 0.30102999 | 0.03812622 | 0 | 7  | 0          | 0.60763643 |
| chr14 | 50150290 | 50161015 | 10726  | 2  | 1 | 5 | 0.30102999 | 0.04407651 | 0 | 8  | 0          | 0.58747015 |
| chr14 | 50161015 | 50530587 | 369573 | 10 | 1 | 5 | 0.30102999 | 0.02473314 | 0 | 9  | 0          | 0.76806864 |
| chr14 | 50530587 | 50704260 | 173674 | 3  | 1 | 5 | 0.30102999 | 0.04407651 | 0 | 8  | 0          | 0.58747015 |
| chr14 | 50704260 | 50732173 | 27914  | 2  | 1 | 5 | 0.30102999 | 0.02473314 | 0 | 9  | 0          | 0.76806864 |
| chr14 | 50732173 | 50799092 | 66920  | 4  | 1 | 5 | 0.30102999 | 0.01320236 | 0 | 10 | 0          | 0.97390707 |
| chr14 | 50799092 | 50886439 | 87348  | 3  | 1 | 5 | 0.30102999 | 0.02473314 | 0 | 9  | 0          | 0.76806864 |
| chr14 | 50886439 | 50886498 | 60     | 1  | 1 | 5 | 0.30102999 | 0.01320236 | 0 | 10 | 0          | 0.97390707 |
| chr14 | 50886498 | 50930811 | 44314  | 1  | 1 | 5 | 0.30102999 | 0.04407651 | 0 | 8  | 0          | 0.58747015 |
| chr14 | 50930811 | 50990758 | 59948  | 2  | 1 | 5 | 0.30102999 | 0.07511598 | 0 | 7  | 0          | 0.43181735 |
| chr14 | 50990758 | 50990817 | 60     | 1  | 1 | 5 | 0.30102999 | 0.01320236 | 0 | 10 | 0          | 0.97390707 |
| chr14 | 50990817 | 51087356 | 96540  | 1  | 1 | 5 | 0.30102999 | 0.04407651 | 0 | 8  | 0          | 0.58747015 |
| chr14 | 51087356 | 51180627 | 93272  | 6  | 2 | 5 | 0.30102999 | 0.04407651 | 1 | 8  | 0.05404976 | 0.58747015 |
| chr14 | 51180627 | 51180686 | 60     | 1  | 2 | 5 | 0.30102999 | 0.02473314 | 1 | 9  | 0.05404976 | 0.76806864 |
| chr14 | 51180686 | 51224031 | 43346  | 1  | 1 | 5 | 0.1218695  | 0.02473314 | 1 | 9  | 0.1218695  | 0.76806864 |
| chr14 | 51224031 | 51224090 | 60     | 1  | 1 | 5 | 0.1218695  | 0.01320236 | 1 | 10 | 0.1218695  | 0.97390707 |
| chr14 | 51224090 | 51273449 | 49360  | 1  | 1 | 4 | 0.1218695  | 0.00530919 | 1 | 10 | 0.1218695  | 1.2568129  |
| chr14 | 51273449 | 51309067 | 35619  | 2  | 1 | 4 | 0.1218695  | 0.00247414 | 1 | 11 | 0.1218695  | 1.52371709 |
| chr14 | 51309067 | 51433946 | 124880 | 3  | 1 | 3 | 0.1218695  | 7.28E-04   | 1 | 11 | 0.1218695  | 1.91540774 |
| chr14 | 51433946 | 51463927 | 29982  | 1  | 1 | 3 | 0.1218695  | 0.00170589 | 1 | 10 | 0.1218695  | 1.61091002 |
| chr14 | 51463927 | 51502495 | 38569  | 2  | 1 | 4 | 0.1218695  | 0.00530919 | 1 | 10 | 0.1218695  | 1.2568129  |
| chr14 | 51502495 | 51502554 | 60     | 1  | 1 | 4 | 0.1218695  | 0.00247414 | 1 | 11 | 0.1218695  | 1.52371709 |
| chr14 | 51502554 | 51540543 | 37990  | 1  | 1 | 4 | 0.1218695  | 0.00530919 | 1 | 10 | 0.1218695  | 1.2568129  |
| chr14 | 51540543 | 51658075 | 117533 | 3  | 1 | 5 | 0.1218695  | 0.01320236 | 1 | 10 | 0.1218695  | 0.97390707 |
| chr14 | 51658075 | 51722367 | 64293  | 1  | 1 | 4 | 0.1218695  | 0.00530919 | 1 | 10 | 0.1218695  | 1.2568129  |
| chr14 | 51722367 | 51722426 | 60     | 1  | 1 | 5 | 0.1218695  | 0.01320236 | 1 | 10 | 0.1218695  | 0.97390707 |
| chr14 | 51722426 | 51876882 | 154457 | 1  | 1 | 5 | 0.1218695  | 0.01077081 | 1 | 9  | 0.1218695  | 1.01542894 |
| chr14 | 51876882 | 52011764 | 134883 | 3  | 1 | 5 | 0.1218695  | 0.02473314 | 1 | 9  | 0.1218695  | 0.76806864 |
| chr14 | 52011764 | 52011823 | 60     | 1  | 1 | 6 | 0.1218695  | 0.04875589 | 1 | 9  | 0.1218695  | 0.5732208  |
| chr14 | 52011823 | 52111062 | 99240  | 2  | 1 | 5 | 0.1218695  | 0.02473314 | 1 | 9  | 0.1218695  | 0.76806864 |
| chr14 | 52111062 | 52184341 | 73280  | 3  | 1 | 3 | 0.1218695  | 0.03070643 | 1 | 6  | 0.1218695  | 0.63695542 |
| chr14 | 52184341 | 52258916 | 74576  | 1  | 1 | 2 | 0.1218695  | 0.01053319 | 1 | 6  | 0.1218695  | 0.91219088 |
| chr14 | 52258916 | 52325875 | 60     | 1  | 1 | 4 | 0.1218695  | 0.02074938 | 1 | 8  | 0.1218695  | 0.79906872 |
| chr14 | 52325875 | 52344142 | 85168  | 2  | 1 | 4 | 0.30102999 | 0.02074938 | 0 | 8  | 0          | 0.79906872 |
| chr14 | 52344142 | 52344201 | 60     | 1  | 1 | 6 | 0.1218695  | 0.04875589 | 1 | 1  | 0.1218695  | 0.5732208  |
| chr14 | 52344201 | 53109274 | 765074 | 15 | 0 | 1 | 0.30102999 | 0.04875589 | 0 | 6  | 0          | 0.5732208  |
| chr14 | 53109274 | 53158972 | 49699  | 1  | 1 | 5 | 0.30102999 | 0.02473314 | 0 | 9  | 0          | 0.76806864 |
| chr14 | 53158972 | 53272714 | 113743 | 6  | 1 | 5 | 0.30102999 | 0.04407651 | 0 | 8  | 0          | 0.58747015 |
| chr14 | 53272714 | 53272773 | 60     | 1  | 1 | 5 | 0.30102999 | 0.02473314 | 0 | 9  | 0          | 0.76806864 |
| chr14 | 53272773 | 53359623 | 86851  | 3  | 1 | 4 | 0.30102999 | 0.01077081 | 0 | 9  | 0          | 1.01542894 |
| chr14 | 53359623 | 53416428 | 56806  | 2  | 1 | 3 | 0.30102999 | 0.00378107 | 0 | 9  | 0          | 1.33111237 |
| chr14 | 53416428 | 53516669 | 115242 | 2  | 1 | 4 | 0.30102999 | 0.01077081 | 0 | 9  | 0          | 1.01542894 |
| chr14 | 53516669 | 53531728 | 60     | 1  | 1 | 4 | 0.30102999 | 0.00530919 | 0 | 10 | 0          | 1.2568129  |
| chr14 | 53531728 | 53961115 | 429388 | 5  | 1 | 4 | 0.30102999 | 0.02074938 | 0 | 8  | 0          | 0.79906872 |
| chr14 | 53961115 | 53961174 | 60     | 1  | 1 | 8 | 0.30102999 | 0.03209037 | 0 | 12 | 0          | 0.72109894 |
| chr14 | 53961174 | 54102976 | 141803 | 1  | 1 | 7 | 0.30102999 | 0.08584816 | 0 | 9  | 0          | 0.42015402 |
| chr14 | 54102976 | 54281379 | 178404 | 1  | 1 | 5 | 0.30102999 | 0.04407651 | 0 | 8  | 0          | 0.58747015 |
| chr14 | 54281379 | 54369532 | 88154  | 2  | 1 | 5 | 0.30102999 | 0.02473314 | 0 | 9  | 0          | 0.76806864 |
| chr14 | 54369532 | 54369591 | 60     | 1  | 1 | 8 | 0.30102999 | 0.05490675 | 0 | 11 | 0          | 0.55623409 |
| chr14 | 54369591 | 54400802 | 31212  | 1  | 1 | 7 | 0.30102999 | 0.03037338 | 0 | 11 | 0          | 0.73110763 |
| chr14 | 54400802 | 54513532 | 112731 | 2  | 0 | 6 | 0          | 0.02793176 | 0 | 10 | 0          | 0.74627054 |
| chr14 | 54513532 | 54513591 | 60     | 1  | 1 | 7 | 0.30102999 | 0.03037338 | 0 | 11 | 0          | 0.73110763 |
| chr14 | 54513591 | 54688294 | 174704 | 1  | 1 | 7 | 0.30102999 | 0.05232577 | 0 | 10 | 0          | 0.56314362 |
| chr14 | 54688294 | 54688353 | 60     | 1  | 2 | 7 | 0.61140001 | 0.05232577 | 0 | 10 | 0          | 0.56314362 |
| chr14 | 54688353 | 54868115 | 179763 | 1  | 1 | 7 | 0.30102999 | 0.08584816 | 0 | 9  | 0          | 0.42015402 |
| chr14 | 54868115 | 54894265 | 26151  | 5  | 1 | 7 | 0.1218695  | 0.05232577 | 1 | 10 | 0.1218695  | 0.56314362 |
| chr14 | 54894265 | 54976696 | 82432  | 2  | 1 | 7 | 0.1218695  | 0.08584816 | 1 | 9  | 0.1218695  | 0.42015402 |
| chr14 | 54976696 | 55046173 | 69478  | 3  | 1 | 7 | 0.1218695  | 0.03037338 | 1 | 11 | 0.1218695  | 0.73110763 |
| chr14 | 55046173 | 55078646 | 32474  | 1  | 1 | 7 | 0.1218695  | 0.05232577 | 0 | 10 | 0.1218695  | 0.56314362 |
| chr14 | 55078646 | 55078705 | 60     | 1  | 1 | 7 | 0.1218695  | 0.03037338 | 0 | 11 | 0.1218695  | 0.73110763 |
| chr14 | 55078705 | 55218217 | 139513 | 3  | 1 | 7 | 0.1218695  | 0.08584816 | 0 | 9  | 0.1218695  | 0.42015402 |
| chr14 | 55218217 | 55386907 | 168691 |    |   |   |            |            |   |    |            |            |

|       |          |          |        |   |   |   |            |            |            |    |    |            |            |
|-------|----------|----------|--------|---|---|---|------------|------------|------------|----|----|------------|------------|
| chr14 | 57741716 | 57741775 | 60     | 1 | 0 | 0 | 8          | 0          | 0.0892391  | 0  | 10 | 0          | 0.4167287  |
| chr14 | 57741775 | 57764896 | 23122  | 1 | 0 | 0 | 6          | 0          | 0.02793176 | 0  | 10 | 0          | 0.74627054 |
| chr14 | 57764896 | 57821892 | 56997  | 2 | 0 | 0 | 6          | 0          | 0.01518174 | 0  | 11 | 0          | 0.9449689  |
| chr14 | 57821892 | 57943319 | 121428 | 2 | 0 | 0 | 6          | 0          | 0.02793176 | 0  | 10 | 0          | 0.74627054 |
| chr14 | 57943319 | 57943378 | 60     | 1 | 0 | 0 | 8          | 0          | 0.05490675 | 0  | 11 | 0          | 0.55623409 |
| chr14 | 57943378 | 58023813 | 80436  | 1 | 0 | 0 | 6          | 0          | 0.02793176 | 0  | 10 | 0          | 0.74627054 |
| chr14 | 58023813 | 58023872 | 60     | 1 | 0 | 0 | 6          | 0          | 0.01518174 | 0  | 11 | 0          | 0.9449689  |
| chr14 | 58023872 | 58214719 | 190848 | 2 | 0 | 0 | 6          | 0          | 0.04875589 | 0  | 9  | 0          | 0.5732208  |
| chr14 | 58214719 | 58214778 | 60     | 1 | 0 | 0 | 6          | 0          | 0.02793176 | 0  | 10 | 0          | 0.74627054 |
| chr14 | 58214778 | 58330211 | 115434 | 1 | 0 | 0 | 5          | 0          | 0.01320236 | 0  | 10 | 0          | 0.97390707 |
| chr14 | 58330211 | 58553226 | 223016 | 3 | 0 | 0 | 5          | 0          | 0.02473314 | 0  | 9  | 0          | 0.76806864 |
| chr14 | 58553226 | 58623335 | 70110  | 2 | 0 | 0 | 5          | 0          | 0.01320236 | 0  | 10 | 0          | 0.97390707 |
| chr14 | 58623335 | 58623394 | 60     | 1 | 0 | 0 | 6          | 0          | 0.02793176 | 0  | 10 | 0          | 0.74627054 |
| chr14 | 58623394 | 58701457 | 78064  | 2 | 0 | 0 | 6          | 0          | 0.08122616 | 0  | 8  | 0          | 0.4250187  |
| chr14 | 58701457 | 58755254 | 53798  | 3 | 1 | 6 | 0.30102999 | 0.02793176 | 0          | 10 | 0  | 0.74627054 |            |
| chr14 | 58755254 | 58755313 | 60     | 1 | 1 | 6 | 0.30102999 | 0.01518174 | 0          | 11 | 0  | 0.9449689  |            |
| chr14 | 58755313 | 58772848 | 17536  | 1 | 0 | 0 | 6          | 0          | 0.02793176 | 0  | 10 | 0          | 0.74627054 |
| chr14 | 58772848 | 58831341 | 58494  | 1 | 0 | 0 | 5          | 0          | 0.01320236 | 0  | 10 | 0          | 0.97390707 |
| chr14 | 58831341 | 58872942 | 41602  | 2 | 0 | 0 | 5          | 0          | 0.00666883 | 0  | 11 | 0          | 1.20557689 |
| chr14 | 58872942 | 58876227 | 3286   | 2 | 0 | 0 | 6          | 0          | 0.00778066 | 0  | 12 | 0          | 1.17038931 |
| chr14 | 58876227 | 58927755 | 51529  | 1 | 0 | 0 | 6          | 0          | 0.01529174 | 0  | 11 | 0          | 0.9449689  |
| chr14 | 58927755 | 58965609 | 37855  | 1 | 0 | 0 | 6          | 0          | 0.02793176 | 0  | 10 | 0          | 0.74627054 |
| chr14 | 58965609 | 58965668 | 60     | 1 | 0 | 0 | 7          | 0          | 0.01667721 | 0  | 12 | 0          | 0.92532268 |
| chr14 | 58965668 | 59014693 | 49026  | 1 | 0 | 0 | 7          | 0          | 0.03037338 | 0  | 11 | 0          | 0.73110763 |
| chr14 | 59014693 | 59187856 | 173164 | 4 | 0 | 0 | 7          | 0          | 0.01667721 | 0  | 12 | 0          | 0.92532268 |
| chr14 | 59187856 | 59303514 | 115659 | 2 | 0 | 0 | 6          | 0          | 0.00778066 | 0  | 12 | 0          | 1.17038931 |
| chr14 | 59303514 | 59303573 | 60     | 1 | 0 | 0 | 7          | 0          | 0.00413023 | 0  | 14 | 0          | 1.39918918 |
| chr14 | 59303573 | 59535937 | 232365 | 2 | 0 | 0 | 7          | 0          | 0.00859896 | 0  | 13 | 0          | 1.14735594 |
| chr14 | 59535937 | 59730218 | 194282 | 4 | 0 | 0 | 6          | 0          | 0.01518174 | 0  | 11 | 0          | 0.9449689  |
| chr14 | 59730218 | 59763943 | 33726  | 2 | 0 | 0 | 6          | 0          | 0.00778066 | 0  | 12 | 0          | 1.17038931 |
| chr14 | 59763943 | 59798529 | 34587  | 2 | 0 | 0 | 6          | 0          | 0.00373523 | 0  | 13 | 0          | 1.42397267 |
| chr14 | 59798529 | 59798588 | 60     | 1 | 0 | 0 | 6          | 0          | 0.00166733 | 0  | 14 | 0          | 1.70763027 |
| chr14 | 59798588 | 59836185 | 37598  | 1 | 0 | 0 | 6          | 0          | 0.00373523 | 0  | 13 | 0          | 1.42397267 |
| chr14 | 59836185 | 59942835 | 106651 | 2 | 0 | 0 | 6          | 0          | 0.00778066 | 0  | 12 | 0          | 1.17038931 |
| chr14 | 59942835 | 59970916 | 28082  | 3 | 0 | 0 | 6          | 0          | 0.00373523 | 0  | 13 | 0          | 1.42397267 |
| chr14 | 59970916 | 60035836 | 64921  | 2 | 0 | 0 | 6          | 0          | 0.00166733 | 0  | 14 | 0          | 1.70763027 |
| chr14 | 60035836 | 60138775 | 102940 | 4 | 0 | 0 | 7          | 0          | 0.00413023 | 0  | 14 | 0          | 1.39918918 |
| chr14 | 60138775 | 60241404 | 102630 | 2 | 0 | 0 | 6          | 0          | 0.00166733 | 0  | 14 | 0          | 1.70763027 |
| chr14 | 60241404 | 60241463 | 60     | 1 | 0 | 0 | 7          | 0          | 0.00183109 | 0  | 15 | 0          | 1.68336308 |
| chr14 | 60241463 | 60269592 | 28130  | 1 | 0 | 0 | 7          | 0          | 0.00413023 | 0  | 14 | 0          | 1.39918918 |
| chr14 | 60269592 | 60318883 | 49292  | 2 | 0 | 0 | 8          | 0          | 0.00909834 | 0  | 14 | 0          | 1.13428373 |
| chr14 | 60318883 | 60353527 | 34645  | 2 | 0 | 0 | 9          | 0          | 0.01817691 | 0  | 14 | 0          | 0.90719478 |
| chr14 | 60353527 | 60353586 | 60     | 1 | 0 | 0 | 10         | 0          | 0.01817691 | 0  | 15 | 0          | 0.90719478 |
| chr14 | 60353586 | 60427918 | 74333  | 2 | 0 | 0 | 9          | 0          | 0.0331093  | 0  | 13 | 0          | 0.71538971 |
| chr14 | 60427918 | 60530114 | 102197 | 3 | 0 | 0 | 9          | 0          | 0.00926608 | 0  | 15 | 0          | 1.13004284 |
| chr14 | 60530114 | 60693845 | 163732 | 6 | 0 | 0 | 9          | 0          | 0.01817691 | 0  | 14 | 0          | 0.90719478 |
| chr14 | 60693845 | 60726206 | 32362  | 1 | 0 | 0 | 9          | 0          | 0.0331093  | 0  | 13 | 0          | 0.71538971 |
| chr14 | 60726206 | 60753408 | 27203  | 1 | 0 | 0 | 9          | 0          | 0.0565833  | 0  | 12 | 0          | 0.55190077 |
| chr14 | 60753408 | 60796463 | 43056  | 1 | 0 | 0 | 9          | 0          | 0.09154957 | 0  | 10 | 0          | 0.41444892 |
| chr14 | 60796463 | 60916182 | 119720 | 2 | 0 | 0 | 8          | 0          | 0.13872638 | 0  | 9  | 0          | 0.30102999 |
| chr14 | 60916182 | 60916241 | 60     | 1 | 0 | 0 | 9          | 0          | 0.20975986 | 0  | 9  | 0          | 0.20975986 |
| chr14 | 60916241 | 60977074 | 60834  | 2 | 0 | 0 | 6          | 0          | 0.04875589 | 0  | 9  | 0          | 0.5732208  |
| chr14 | 60977074 | 60977132 | 59     | 1 | 0 | 0 | 7          | 0          | 0.08584816 | 0  | 9  | 0          | 0.42015402 |
| chr14 | 60977132 | 61113751 | 136620 | 2 | 0 | 0 | 6          | 0          | 0.04875589 | 0  | 9  | 0          | 0.5732208  |
| chr14 | 61113751 | 61182099 | 68349  | 1 | 0 | 0 | 6          | 0          | 0.08122616 | 0  | 8  | 0          | 0.4250187  |
| chr14 | 61182099 | 61213346 | 31248  | 1 | 0 | 0 | 5          | 0          | 0.12309572 | 0  | 6  | 0          | 0.30102999 |
| chr14 | 61213346 | 61213405 | 60     | 1 | 0 | 0 | 6          | 0          | 0.20064824 | 0  | 6  | 0          | 0.20064824 |
| chr14 | 61213405 | 61339969 | 126565 | 3 | 0 | 0 | 5          | 0          | 0.12309572 | 0  | 6  | 0          | 0.30102999 |
| chr14 | 61339969 | 61464621 | 124653 | 3 | 0 | 0 | 4          | 0          | 0.11390336 | 0  | 5  | 0          | 0.30102999 |
| chr14 | 61464621 | 61650561 | 185941 | 4 | 0 | 0 | 4          | 0          | 0.06713722 | 0  | 6  | 0          | 0.44141547 |
| chr14 | 61650561 | 61650620 | 60     | 1 | 0 | 0 | 5          | 0          | 0.07511598 | 0  | 7  | 0          | 0.43181735 |
| chr14 | 61650620 | 61740278 | 89659  | 1 | 0 | 0 | 5          | 0          | 0.12309572 | 0  | 6  | 0          | 0.30102999 |
| chr14 | 61740278 | 61740337 | 60     | 1 | 0 | 0 | 6          | 0          | 0.20064824 | 0  | 6  | 0          | 0.20064824 |
| chr14 | 61740337 | 61795770 | 55434  | 1 | 0 | 0 | 5          | 0          | 0.12309572 | 0  | 6  | 0          | 0.30102999 |
| chr14 | 61795770 | 61935994 | 120225 | 3 | 0 | 0 | 5          | 0          | 0.07511598 | 0  | 7  | 0          | 0.43181735 |
| chr14 | 61935994 | 61983054 | 67061  | 2 | 0 | 0 | 4          | 0          | 0.18734596 | 0  | 4  | 0          | 0.18734596 |
| chr14 | 61983054 | 62050287 | 67234  | 2 | 0 | 0 | 4          | 0          | 0.10122019 | 0  | 4  | 0          | 0.30102999 |
| chr14 | 62050287 | 62050346 | 60     | 1 | 0 | 0 | 4          | 0          | 0.18734596 | 0  | 4  | 0          | 0.18734596 |
| chr14 | 62050346 | 62170482 | 120137 | 1 | 0 | 0 | 4          | 0          | 0.30102999 | 0  | 3  | 0          | 0.10122019 |
| chr14 | 62170482 | 62188486 | 18005  | 1 | 0 | 0 | 4          | 0          | 0.17593012 | 0  | 3  | 0          | 0.17593012 |
| chr14 | 62188486 | 62256867 | 68382  | 3 | 0 | 0 | 3          | 0          | 0.10122019 | 0  | 4  | 0          | 0.30102999 |
| chr14 | 62256867 | 62256926 | 60     | 1 | 0 | 0 | 4          | 0          | 0.11390336 | 0  | 5  | 0          | 0.30102999 |
| chr14 | 62256926 | 62462964 | 206039 | 3 | 0 | 0 | 3          | 0          | 0.05670724 | 0  | 5  | 0          | 0.45545077 |
| chr14 | 62462964 | 62506173 | 43210  | 2 | 0 | 0 | 4          | 0          | 0.02074938 | 0  | 5  | 0          | 0.79906872 |
| chr14 | 62506173 | 62765482 | 259310 | 4 | 0 | 0 | 4          | 0          | 0.03812622 | 0  | 7  | 0          | 0.60763643 |
| chr14 | 62765482 | 62889240 | 123759 | 2 | 0 | 0 | 6          | 0          | 0.02793176 | 0  | 10 | 0          | 0.74627054 |
| chr14 | 62889240 | 62889299 | 60     | 1 | 0 | 0 | 7          | 0          | 0.03037338 | 0  | 11 | 0          | 0.73110763 |
| chr14 | 62889299 | 63121777 | 232479 | 1 | 0 | 0 | 6          | 0          | 0.02793176 | 0  | 10 | 0          | 0.74627054 |
| chr14 | 63121777 | 63211191 | 89415  | 2 | 0 | 0 | 5          | 0          | 0.01320236 | 0  | 10 | 0          | 0.97390707 |
| chr14 | 63211191 | 63246472 | 35282  | 2 | 0 | 0 | 8          | 0          | 0.0892391  | 0  | 10 | 0          | 0.4167287  |
| chr14 | 63246472 | 63350606 | 104135 | 2 | 0 | 0 | 6          | 0          | 0.02793176 | 0  | 10 | 0          | 0.74627054 |
| chr14 | 63350606 | 63350665 | 60     | 1 | 0 | 0 | 7          | 0          | 0.01667721 | 0  | 12 | 0          | 0.92532268 |
| chr14 | 63350665 | 63417051 | 66387  | 1 | 0 | 0 | 6          | 0          | 0.00778066 | 0  | 12 | 0          | 1.17038931 |
| chr14 | 63417051 | 63417105 | 55     | 1 | 0 | 0 | 8          | 0          | 0.03209037 | 0  | 12 | 0          | 0.72109894 |
| chr14 | 63417105 | 63502514 | 85410  | 2 | 0 | 0 | 8          | 0          | 0.05490675 | 0  | 11 | 0          | 0.55623409 |
| chr14 | 63502514 | 63502573 | 60     | 1 | 0 | 0 | 9          | 0          | 0.01817691 | 0  | 14 | 0          | 0.90719478 |
| chr14 | 63502573 | 63568516 | 65944  | 1 | 0 | 0 | 9          | 0          | 0.14135546 | 0  | 10 | 0          | 0.30102999 |
| chr14 | 63568516 | 63568575 | 60     | 1 | 0 | 0 | 10         | 0          | 0.14303407 | 0  | 11 | 0          | 0.30102999 |
| chr14 | 63568575 | 63644421 | 75847  | 1 | 0 | 0 | 9          | 0          | 0.09154957 | 0  | 11 | 0          | 0.41444892 |
| chr14 | 63644421 | 63690040 | 45620  | 2 | 0 | 0 | 9          | 0          | 0.01817691 | 0  | 14 | 0          | 0.90719478 |
| chr14 | 63690040 | 63690099 | 60     | 1 | 0 | 0 | 10         | 0          | 0.01817691 | 0  | 15 | 0          | 0.90719478 |
| chr14 | 63690099 | 63754762 | 64664  | 2 | 0 | 0 | 10         | 0          | 0.03344703 | 0  | 14 | 0          | 0.71353304 |
| chr14 | 63754762 | 63782364 | 27603  | 2 | 0 | 0 | 11         | 0          | 0.0574087  | 0  | 14 | 0          | 0.5498098  |
| chr14 | 63782364 | 63849077 | 66714  | 1 | 0 | 0 | 10         | 0          | 0.03344703 | 0  | 14 | 0          | 0.71353304 |
| chr14 | 63849077 | 63888769 | 39693  | 1 | 0 | 0 | 9          | 0          | 0.01817691 | 0  | 14 | 0          | 0.90719478 |
| chr14 | 63888769 | 63920493 | 31725  | 2 | 0 | 0 | 10         | 0          | 0.03344703 | 0  | 14 | 0          | 0.71353304 |
| chr14 | 63920493 | 63920552 | 60     | 1 | 0 | 0 | 12         | 0          | 0.09290028 | 0  | 14 | 0          | 0.41314172 |
| chr14 | 639      |          |        |   |   |   |            |            |            |    |    |            |            |

|       |          |          |        |    |   |   |   |            |   |    |            |            |
|-------|----------|----------|--------|----|---|---|---|------------|---|----|------------|------------|
| chr14 | 65408629 | 65419641 | 11013  | 1  | 0 | 8 | 0 | 0.01767679 | 0 | 13 | 0          | 0.91308053 |
| chr14 | 65419641 | 65419700 | 60     | 1  | 0 | 9 | 0 | 0.0331093  | 0 | 13 | 0          | 0.71538971 |
| chr14 | 65419700 | 65454572 | 34873  | 1  | 0 | 8 | 0 | 0.03209037 | 0 | 12 | 0          | 0.72109894 |
| chr14 | 65454572 | 65454631 | 60     | 1  | 0 | 8 | 0 | 0.03209037 | 1 | 12 | 0.30102999 | 0.72109894 |
| chr14 | 65454631 | 65489651 | 35021  | 1  | 0 | 8 | 0 | 0.05490675 | 1 | 11 | 0.30102999 | 0.55623409 |
| chr14 | 65489651 | 65495426 | 5776   | 2  | 0 | 9 | 0 | 0.09154957 | 1 | 11 | 0.30102999 | 0.41444892 |
| chr14 | 65495426 | 65550649 | 55224  | 2  | 0 | 8 | 0 | 0.08923391 | 1 | 10 | 0.30102999 | 0.41672787 |
| chr14 | 65550649 | 65712661 | 162013 | 1  | 0 | 8 | 0 | 0.13872638 | 1 | 9  | 0.30102999 | 0.30102999 |
| chr14 | 65712661 | 65712720 | 60     | 1  | 0 | 8 | 0 | 0.08923391 | 1 | 10 | 0.30102999 | 0.41672787 |
| chr14 | 65712720 | 65844388 | 131669 | 1  | 0 | 8 | 0 | 0.20764654 | 1 | 7  | 0.30102999 | 0.20764654 |
| chr14 | 65844388 | 65917230 | 72843  | 1  | 0 | 7 | 0 | 0.20469099 | 1 | 8  | 0.30102999 | 0.20469099 |
| chr14 | 65917230 | 65942823 | 25594  | 1  | 0 | 7 | 0 | 0.30102999 | 1 | 6  | 0.30102999 | 0.129913   |
| chr14 | 65942823 | 66028148 | 85326  | 3  | 0 | 8 | 0 | 0.4250187  | 1 | 6  | 0.30102999 | 0.08122616 |
| chr14 | 66028148 | 66136142 | 107995 | 4  | 0 | 8 | 0 | 0.30102999 | 1 | 7  | 0.30102999 | 0.13499366 |
| chr14 | 66136142 | 66191045 | 54904  | 1  | 0 | 8 | 0 | 0.4250187  | 1 | 7  | 0.30102999 | 0.08122616 |
| chr14 | 66191045 | 66486883 | 295839 | 3  | 0 | 8 | 0 | 0.79906872 | 1 | 4  | 0.30102999 | 0.02074938 |
| chr14 | 66486883 | 66641874 | 154992 | 1  | 0 | 6 | 0 | 0.44141547 | 0 | 4  | 0          | 0.06713722 |
| chr14 | 66641874 | 66761948 | 120075 | 2  | 0 | 6 | 0 | 0.30102999 | 0 | 5  | 0          | 0.12309972 |
| chr14 | 66761948 | 66762007 | 60     | 1  | 0 | 7 | 0 | 0          | 1 | 5  | 0.30102999 | 0.07511598 |
| chr14 | 66762007 | 66914334 | 152308 | 1  | 0 | 7 | 0 | 0.43181735 | 1 | 4  | 0.30102999 | 0.03812622 |
| chr14 | 66914334 | 66914373 | 60     | 1  | 0 | 7 | 0 | 0.60763643 | 1 | 4  | 0.30102999 | 0.129913   |
| chr14 | 66914373 | 66959646 | 45274  | 1  | 0 | 5 | 0 | 0.30102999 | 1 | 6  | 0.30102999 | 0.30102999 |
| chr14 | 66959646 | 67024822 | 65177  | 2  | 0 | 5 | 0 | 0.12309572 | 1 | 6  | 0.30102999 | 0.30102999 |
| chr14 | 67024822 | 67024881 | 60     | 1  | 0 | 6 | 0 | 0.07511598 | 1 | 7  | 0.30102999 | 0.43181735 |
| chr14 | 67024881 | 67102238 | 77358  | 1  | 0 | 5 | 0 | 0.129913   | 1 | 7  | 0.30102999 | 0.30102999 |
| chr14 | 67102238 | 67146757 | 44520  | 2  | 0 | 6 | 0 | 0.12309572 | 0 | 6  | 0          | 0.30102999 |
| chr14 | 67146757 | 67146816 | 60     | 1  | 0 | 7 | 0 | 0.20064824 | 0 | 6  | 0          | 0.20064824 |
| chr14 | 67146816 | 67176538 | 29723  | 1  | 0 | 7 | 0 | 0.13499366 | 1 | 8  | 0.30102999 | 0.30102999 |
| chr14 | 67176538 | 67291216 | 114679 | 2  | 0 | 6 | 0 | 0.30102999 | 1 | 6  | 0.30102999 | 0.129913   |
| chr14 | 67291216 | 67390977 | 99762  | 3  | 0 | 6 | 0 | 0.20064824 | 1 | 6  | 0.30102999 | 0.20064824 |
| chr14 | 67390977 | 67391036 | 60     | 1  | 0 | 7 | 0 | 0.129913   | 1 | 7  | 0.30102999 | 0.30102999 |
| chr14 | 67391036 | 67435993 | 44958  | 1  | 0 | 7 | 0 | 0.20469099 | 1 | 7  | 0.30102999 | 0.20469099 |
| chr14 | 67435993 | 67487660 | 51668  | 1  | 0 | 5 | 0 | 0.20469099 | 0 | 7  | 0          | 0.20469099 |
| chr14 | 67487660 | 67556486 | 68827  | 3  | 0 | 5 | 0 | 0.07511598 | 0 | 7  | 0          | 0.43181735 |
| chr14 | 67556486 | 67628628 | 72143  | 2  | 0 | 5 | 0 | 0.07511598 | 1 | 7  | 0.30102999 | 0.43181735 |
| chr14 | 67628628 | 67674948 | 46321  | 2  | 0 | 5 | 0 | 0.07511598 | 1 | 7  | 0.30102999 | 0.43181735 |
| chr14 | 67674948 | 67748075 | 73128  | 2  | 0 | 5 | 0 | 0.07511598 | 1 | 7  | 0          | 0.43181735 |
| chr14 | 67748075 | 67773485 | 25411  | 1  | 0 | 4 | 0 | 0.07511598 | 0 | 7  | 0          | 0.60763643 |
| chr14 | 67773485 | 67819647 | 41613  | 3  | 0 | 5 | 0 | 0.3812622  | 1 | 7  | 0.30102999 | 0.43181735 |
| chr14 | 67819647 | 67921079 | 101433 | 6  | 0 | 6 | 0 | 0.07511598 | 1 | 7  | 0.30102999 | 0.30102999 |
| chr14 | 67921079 | 67952185 | 31107  | 2  | 0 | 6 | 0 | 0.129913   | 1 | 7  | 0.30102999 | 0.30102999 |
| chr14 | 67952185 | 67979852 | 27668  | 1  | 0 | 6 | 0 | 0.04875589 | 1 | 8  | 0.30102999 | 0.5732208  |
| chr14 | 67979852 | 68008058 | 28207  | 1  | 0 | 5 | 0 | 0.08122616 | 1 | 8  | 0.30102999 | 0.4250187  |
| chr14 | 68008058 | 68008117 | 60     | 1  | 0 | 5 | 0 | 0.04407651 | 0 | 8  | 0.30102999 | 0.58747015 |
| chr14 | 68008117 | 68055825 | 47709  | 1  | 0 | 5 | 0 | 0.02473314 | 1 | 9  | 0.30102999 | 0.76806864 |
| chr14 | 68055825 | 68055884 | 60     | 1  | 0 | 6 | 0 | 0.02473314 | 0 | 9  | 0          | 0.76806864 |
| chr14 | 68055884 | 68110498 | 54615  | 1  | 0 | 6 | 0 | 0.04875589 | 0 | 9  | 0          | 0.5732208  |
| chr14 | 68110498 | 68146540 | 36043  | 2  | 0 | 6 | 0 | 0.08122616 | 1 | 8  | 0          | 0.4250187  |
| chr14 | 68146540 | 68161859 | 15320  | 1  | 0 | 6 | 0 | 0.04875589 | 1 | 9  | 0.30102999 | 0.5732208  |
| chr14 | 68161859 | 68352643 | 190785 | 6  | 0 | 6 | 0 | 0.04875589 | 0 | 9  | 0          | 0.76806864 |
| chr14 | 68352643 | 68517124 | 164482 | 5  | 0 | 6 | 0 | 0.02473314 | 0 | 9  | 0          | 0.5732208  |
| chr14 | 68517124 | 68567255 | 50132  | 1  | 0 | 5 | 0 | 0.04875589 | 0 | 9  | 0          | 0.76806864 |
| chr14 | 68567255 | 68816594 | 249340 | 5  | 0 | 5 | 0 | 0.02473314 | 0 | 9  | 0          | 0.5732208  |
| chr14 | 68816594 | 68944469 | 127876 | 3  | 0 | 4 | 0 | 0.44007651 | 0 | 8  | 0          | 0.60763643 |
| chr14 | 68944469 | 68944528 | 60     | 1  | 0 | 5 | 0 | 0.3812622  | 1 | 7  | 0          | 0.43181735 |
| chr14 | 68944528 | 69092689 | 148162 | 4  | 0 | 4 | 0 | 0.07511598 | 0 | 7  | 0          | 0.60763643 |
| chr14 | 69092689 | 69175045 | 82357  | 2  | 0 | 5 | 0 | 0.3812622  | 1 | 7  | 0          | 0.43181735 |
| chr14 | 69175045 | 69254090 | 79046  | 2  | 0 | 5 | 0 | 0.07511598 | 0 | 8  | 0          | 0.58747015 |
| chr14 | 69254090 | 69341278 | 87189  | 3  | 0 | 5 | 0 | 0.04407651 | 0 | 10 | 0          | 0.97390707 |
| chr14 | 69341278 | 69415799 | 74522  | 3  | 0 | 6 | 0 | 0.1320236  | 0 | 10 | 0          | 0.74627054 |
| chr14 | 69415799 | 69622832 | 207034 | 5  | 0 | 6 | 0 | 0.02793176 | 0 | 11 | 0          | 0.9449689  |
| chr14 | 69622832 | 69673588 | 50757  | 3  | 0 | 6 | 0 | 0.01518174 | 0 | 12 | 0          | 1.17038931 |
| chr14 | 69673588 | 69693571 | 19984  | 1  | 0 | 6 | 0 | 0.00778066 | 0 | 11 | 0          | 0.9449689  |
| chr14 | 69693571 | 69863905 | 170335 | 4  | 0 | 6 | 0 | 0.01518174 | 0 | 10 | 0          | 0.74627054 |
| chr14 | 69863905 | 69866067 | 2163   | 2  | 0 | 6 | 0 | 0.02793176 | 0 | 11 | 0          | 0.9449689  |
| chr14 | 69866067 | 69958019 | 94053  | 3  | 0 | 5 | 0 | 0.01518174 | 0 | 11 | 0          | 1.20557689 |
| chr14 | 69958019 | 70287880 | 329662 | 10 | 0 | 7 | 0 | 0.01518174 | 0 | 11 | 0          | 0.9449689  |
| chr14 | 70287880 | 70376683 | 88804  | 3  | 0 | 7 | 0 | 0.03037338 | 0 | 11 | 0          | 0.73110763 |
| chr14 | 70376683 | 70480078 | 103996 | 2  | 0 | 7 | 0 | 0.08584816 | 0 | 9  | 0          | 0.42015402 |
| chr14 | 70480078 | 70633490 | 153413 | 5  | 0 | 7 | 0 | 0.0232577  | 0 | 10 | 0          | 0.56314362 |
| chr14 | 70633490 | 70681664 | 48175  | 2  | 0 | 7 | 0 | 0.03037338 | 0 | 11 | 0          | 0.73110763 |
| chr14 | 70681664 | 70809358 | 127695 | 3  | 0 | 7 | 0 | 0.05232577 | 0 | 10 | 0          | 0.56314362 |
| chr14 | 70809358 | 70809417 | 60     | 1  | 0 | 7 | 0 | 0.03037338 | 0 | 11 | 0          | 0.73110763 |
| chr14 | 70809417 | 70879349 | 69933  | 2  | 0 | 7 | 0 | 0.05232577 | 0 | 10 | 0          | 0.56314362 |
| chr14 | 70879349 | 70879408 | 60     | 1  | 0 | 7 | 0 | 0.03037338 | 0 | 11 | 0          | 0.73110763 |
| chr14 | 70879408 | 70926316 | 46909  | 1  | 0 | 6 | 0 | 0.05232577 | 0 | 10 | 0          | 0.9449689  |
| chr14 | 70926316 | 71478637 | 552322 | 12 | 0 | 6 | 0 | 0.01518174 | 0 | 11 | 0          | 0.74627054 |
| chr14 | 71478637 | 71511833 | 33197  | 1  | 0 | 6 | 0 | 0.02793176 | 0 | 9  | 0          | 0.5732208  |
| chr14 | 71511833 | 71570220 | 58388  | 2  | 0 | 6 | 0 | 0.04875589 | 0 | 10 | 0          | 0.74627054 |
| chr14 | 71570220 | 71570279 | 60     | 1  | 0 | 6 | 0 | 0.07511598 | 0 | 9  | 0          | 0.5732208  |
| chr14 | 71570279 | 71809270 | 238992 | 2  | 0 | 6 | 0 | 0.01518174 | 0 | 11 | 0          | 0.9449689  |
| chr14 | 71809270 | 71874708 | 65439  | 2  | 0 | 6 | 0 | 0.04875589 | 0 | 9  | 0          | 0.5732208  |
| chr14 | 71874708 | 71947841 | 73134  | 2  | 0 | 7 | 0 | 0.01518174 | 0 | 12 | 0          | 0.9449689  |
| chr14 | 71947841 | 71996029 | 48189  | 2  | 0 | 7 | 0 | 0.1667721  | 1 | 12 | 0.30102999 | 0.92532268 |
| chr14 | 71996029 | 71996085 | 57     | 1  | 0 | 8 | 0 | 0.03209037 | 1 | 12 | 0.30102999 | 0.72109894 |
| chr14 | 71996085 | 72054358 | 58274  | 1  | 0 | 7 | 0 | 0.01667721 | 1 | 12 | 0.30102999 | 0.92532268 |
| chr14 | 72054358 | 72054417 | 60     | 1  | 0 | 7 | 0 | 0.00859896 | 1 | 13 | 0.30102999 | 1.14735594 |
| chr14 | 72054417 | 72085516 | 31100  | 1  | 0 | 7 | 0 | 0.00859896 | 1 | 13 | 0.30102999 | 1.14735594 |
| chr14 | 72085516 | 72138317 | 52802  | 1  | 0 | 7 | 0 | 0.0232577  | 0 | 10 | 0          | 0.56314362 |
| chr14 | 72138317 | 72238092 | 99776  | 3  | 0 | 7 | 0 | 0.05232577 | 0 | 10 | 0          | 0.56314362 |
| chr14 | 72238092 | 72351950 | 113859 | 1  | 0 | 5 | 0 | 0.03037338 | 0 | 11 | 0          | 0.73110763 |
| chr14 | 72351950 | 72352009 | 60     | 1  | 0 | 5 | 0 | 0.00666883 | 0 | 11 | 0          | 1.20557689 |
| chr14 | 72352009 | 72400769 | 48761  | 1  | 0 | 5 | 0 | 0.00317045 | 1 | 12 | 0.30102999 | 1.46403142 |
| chr14 | 72400769 | 72498653 | 97885  | 2  | 0 | 5 | 0 | 0.00666883 | 1 | 11 | 0.30102999 | 1.20557689 |
| chr14 | 72498653 | 72674392 | 175740 | 5  | 0 | 5 | 0 | 0.04407651 | 0 | 8  | 0.30102999 | 0.58747015 |
| chr14 | 72674392 | 72714751 | 40360  | 3  | 0 | 5 | 0 | 0.07511598 | 0 | 7  | 0.30102999 | 0.43181735 |
| chr14 | 72714751 | 72932497 | 217747 | 5  | 0 | 5 | 0 | 0.02473314 | 1 | 9  | 0.30102999 | 0.76806864 |
| chr14 | 72932497 | 73062467 | 129971 | 5  | 0 | 5 | 0 | 0.44007651 | 1 | 8  | 0.30102999 | 0.58747015 |
| chr14 | 73062467 | 73190383 | 127917 | 2  | 0 | 5 | 0 | 0.02473314 | 1 | 8  | 0.30102    |            |

|       |          |          |        |     |   |   |            |            |    |            |            |            |
|-------|----------|----------|--------|-----|---|---|------------|------------|----|------------|------------|------------|
| chr14 | 74428487 | 74453896 | 25410  | 2   | 1 | 5 | 0.30102999 | 0.01320236 | 0  | 10         | 0          | 0.97390707 |
| chr14 | 74453896 | 74482570 | 28675  | 1   | 0 | 5 | 0          | 0.01320236 | 0  | 10         | 0          | 0.97390707 |
| chr14 | 74482570 | 74527123 | 44554  | 2   | 0 | 5 | 0          | 0.02473314 | 0  | 9          | 0          | 0.76806864 |
| chr14 | 74527123 | 74588861 | 61739  | 5   | 0 | 6 | 0          | 0.00778066 | 0  | 12         | 0          | 1.17038931 |
| chr14 | 74588861 | 74657699 | 68839  | 2   | 0 | 5 | 0          | 0.01320236 | 0  | 10         | 0          | 0.97390707 |
| chr14 | 74657699 | 74729392 | 71694  | 3   | 0 | 7 | 0          | 0.01667721 | 0  | 12         | 0          | 0.92532268 |
| chr14 | 74729392 | 74852834 | 123443 | 4   | 0 | 6 | 0          | 0.04875589 | 0  | 9          | 0          | 0.57322208 |
| chr14 | 74852834 | 74965551 | 112718 | 6   | 0 | 6 | 0          | 0.01518174 | 0  | 11         | 0          | 0.94496889 |
| chr14 | 74965551 | 75011471 | 45921  | 1   | 0 | 6 | 0          | 0.04875589 | 0  | 9          | 0          | 0.57322208 |
| chr14 | 75011471 | 75106700 | 95230  | 2   | 0 | 6 | 0          | 0.08122616 | 0  | 8          | 0          | 0.4250187  |
| chr14 | 75106700 | 75136527 | 29828  | 2   | 0 | 6 | 0          | 0.02793176 | 0  | 10         | 0          | 0.74627054 |
| chr14 | 75136527 | 75136586 | 60     | 1   | 0 | 6 | 0          | 0.01518174 | 0  | 11         | 0          | 0.94496889 |
| chr14 | 75136586 | 75167626 | 31041  | 1   | 0 | 6 | 0          | 0.02793176 | 0  | 10         | 0          | 0.74627054 |
| chr14 | 75167626 | 75199965 | 32340  | 1   | 0 | 6 | 0          | 0.04875589 | 0  | 9          | 0          | 0.57322208 |
| chr14 | 75199965 | 75262432 | 62468  | 2   | 0 | 6 | 0          | 0.02793176 | 0  | 10         | 0          | 0.74627054 |
| chr14 | 75262432 | 75293891 | 31460  | 2   | 0 | 6 | 0          | 0.01518174 | 0  | 11         | 0          | 0.94496889 |
| chr14 | 75293891 | 75351423 | 57533  | 1   | 0 | 6 | 0          | 0.02793176 | 0  | 10         | 0          | 0.74627054 |
| chr14 | 75351423 | 75383512 | 32090  | 1   | 0 | 5 | 0          | 0.01320236 | 0  | 10         | 0          | 0.97390707 |
| chr14 | 75383512 | 75412267 | 28756  | 2   | 0 | 6 | 0          | 0.01518174 | 0  | 11         | 0          | 0.94496889 |
| chr14 | 75412267 | 75420179 | 7913   | 1   | 0 | 6 | 0          | 0.00778066 | 0  | 12         | 0          | 1.17038931 |
| chr14 | 75420179 | 75474484 | 54306  | 1   | 0 | 5 | 0          | 0.00666883 | 0  | 11         | 0          | 1.20557689 |
| chr14 | 75474484 | 75498796 | 24313  | 2   | 0 | 5 | 0          | 0.01320236 | 0  | 10         | 0          | 0.97390707 |
| chr14 | 75498796 | 75500431 | 1636   | 1   | 0 | 5 | 0          | 0.00317045 | 0  | 12         | 0          | 1.46403142 |
| chr14 | 75500431 | 75520250 | 19820  | 1   | 0 | 5 | 0          | 0.00666883 | 0  | 11         | 0          | 1.20557689 |
| chr14 | 75520250 | 75538123 | 17874  | 1   | 0 | 5 | 0          | 0.01320236 | 0  | 10         | 0          | 0.97390707 |
| chr14 | 75538123 | 75538180 | 58     | 1   | 0 | 6 | 0          | 0.02793176 | 0  | 10         | 0          | 0.74627054 |
| chr14 | 75538180 | 75601789 | 63610  | 3   | 0 | 6 | 0          | 0.04875589 | 0  | 9          | 0          | 0.57322208 |
| chr14 | 75601789 | 75634738 | 32950  | 2   | 0 | 6 | 0          | 0.02793176 | 0  | 10         | 0          | 0.74627054 |
| chr14 | 75634738 | 75707900 | 73163  | 1   | 0 | 6 | 0          | 0.04875589 | 0  | 9          | 0          | 0.57322208 |
| chr14 | 75707900 | 75911460 | 203561 | 5   | 0 | 6 | 0          | 0.02793176 | 0  | 10         | 0          | 0.74627054 |
| chr14 | 75911460 | 75998028 | 86569  | 4   | 0 | 7 | 0          | 0.05232577 | 0  | 10         | 0          | 0.56314362 |
| chr14 | 75998028 | 76029170 | 31143  | 1   | 0 | 7 | 0          | 0.08584816 | 0  | 9          | 0          | 0.42015402 |
| chr14 | 76029170 | 76178616 | 149447 | 4   | 0 | 7 | 0          | 0.13499366 | 0  | 8          | 0          | 0.30102999 |
| chr14 | 76178616 | 76249474 | 70859  | 3   | 0 | 7 | 0          | 0.08584816 | 0  | 9          | 0          | 0.42015402 |
| chr14 | 76249474 | 76249533 | 60     | 1   | 0 | 7 | 0          | 0.05232577 | 0  | 10         | 0          | 0.56314362 |
| chr14 | 76249533 | 76283830 | 34298  | 1   | 0 | 7 | 0          | 0.08584816 | 0  | 9          | 0          | 0.42015402 |
| chr14 | 76283830 | 76379255 | 95426  | 2   | 0 | 5 | 0          | 0.04407651 | 0  | 8          | 0          | 0.58747015 |
| chr14 | 76379255 | 76379314 | 60     | 1   | 0 | 6 | 0          | 0.08122616 | 0  | 8          | 0          | 0.4250187  |
| chr14 | 76379314 | 76429495 | 50182  | 2   | 0 | 6 | 0          | 0.129913   | 0  | 7          | 0          | 0.30102999 |
| chr14 | 76429495 | 76437972 | 8478   | 2   | 0 | 6 | 0          | 0.08122616 | 0  | 8          | 0          | 0.4250187  |
| chr14 | 76437972 | 76438023 | 52     | 1   | 1 | 6 | 0.30102999 | 0.08122616 | 0  | 8          | 0          | 0.4250187  |
| chr14 | 76438023 | 76522752 | 84730  | 3   | 1 | 5 | 0.30102999 | 0.04407651 | 0  | 8          | 0          | 0.58747015 |
| chr14 | 76522752 | 76838020 | 315269 | 6   | 1 | 5 | 0.1218695  | 0.04407651 | 1  | 8          | 0.1218695  | 0.58747015 |
| chr14 | 76838020 | 76871081 | 33062  | 2   | 1 | 5 | 0.1218695  | 0.01320236 | 1  | 10         | 0.1218695  | 0.97390707 |
| chr14 | 76871081 | 76921568 | 50488  | 2   | 1 | 5 | 0.1218695  | 0.02473314 | 1  | 9          | 0.1218695  | 0.76806864 |
| chr14 | 76921568 | 77007569 | 86002  | 3   | 2 | 5 | 0.30102999 | 0.01320236 | 1  | 10         | 0.05404976 | 0.97390707 |
| chr14 | 77007569 | 77007628 | 60     | 1   | 2 | 5 | 0.30102999 | 0.00666883 | 11 | 0.05404976 | 1.20557689 |            |
| chr14 | 77007628 | 77069559 | 61932  | 1   | 2 | 5 | 0.6114001  | 0.00666883 | 11 | 0          | 1.20557689 |            |
| chr14 | 77069559 | 77069618 | 60     | 1   | 3 | 5 | 0.93173516 | 0.00666883 | 11 | 0          | 1.20557689 |            |
| chr14 | 77069618 | 77234043 | 164426 | 1   | 3 | 5 | 0.93173516 | 0.01320236 | 10 | 0          | 0.97390707 |            |
| chr14 | 77234043 | 77239990 | 5948   | 2   | 3 | 6 | 0.93173516 | 0.01518174 | 11 | 0          | 0.94496889 |            |
| chr14 | 77239990 | 77275951 | 35962  | 2   | 3 | 5 | 0.93173516 | 0.00666883 | 11 | 0          | 1.20557689 |            |
| chr14 | 77275951 | 77297972 | 22022  | 2   | 3 | 5 | 0.51676182 | 0.00778066 | 1  | 12         | 0.02438896 | 1.17038931 |
| chr14 | 77297972 | 77361405 | 63434  | 2   | 3 | 5 | 0.51676182 | 0.02473314 | 1  | 9          | 0.02438896 | 0.76806864 |
| chr14 | 77361405 | 77361464 | 60     | 1   | 3 | 6 | 0.51676182 | 0.02793176 | 1  | 10         | 0.02438896 | 0.74627054 |
| chr14 | 77361464 | 77432360 | 70897  | 1   | 2 | 6 | 0.30102999 | 0.02793176 | 1  | 10         | 0.05404976 | 0.74627054 |
| chr14 | 77432360 | 77432419 | 60     | 1   | 2 | 6 | 0.30102999 | 0.01518174 | 11 | 0.05404976 | 0.94496889 |            |
| chr14 | 77432419 | 77546084 | 113666 | 3   | 2 | 6 | 0.6114001  | 0.02793176 | 10 | 0          | 0.74627054 |            |
| chr14 | 77546084 | 77546143 | 60     | 1   | 2 | 6 | 0.6114001  | 0.01518174 | 11 | 0          | 0.94496889 |            |
| chr14 | 77546143 | 7743283  | 197141 | 7   | 2 | 5 | 0.6114001  | 0.01320236 | 10 | 0          | 0.97390707 |            |
| chr14 | 7743283  | 77786448 | 43166  | 3   | 2 | 5 | 0.6114001  | 0.00666883 | 11 | 0          | 1.20557689 |            |
| chr14 | 77786448 | 77819550 | 33103  | 3   | 2 | 5 | 0.6114001  | 0.01518174 | 11 | 0          | 0.94496889 |            |
| chr14 | 77819550 | 77880416 | 60867  | 1   | 2 | 5 | 0.6114001  | 0.00666883 | 11 | 0          | 1.20557689 |            |
| chr14 | 77880416 | 7790475  | 60     | 1   | 3 | 5 | 0.93173516 | 0.00666883 | 11 | 0          | 1.20557689 |            |
| chr14 | 7790475  | 77904180 | 23706  | 1   | 3 | 5 | 0.93173516 | 0.01320236 | 10 | 0          | 0.97390707 |            |
| chr14 | 77904180 | 77926098 | 21919  | 1   | 3 | 5 | 0.93173516 | 0.02473314 | 9  | 0          | 0.76806864 |            |
| chr14 | 77926098 | 77926157 | 60     | 1   | 3 | 6 | 0.93173516 | 0.01518174 | 11 | 0          | 0.94496889 |            |
| chr14 | 77926157 | 7795890  | 69734  | 3   | 3 | 6 | 0.93173516 | 0.02793176 | 10 | 0          | 0.74627054 |            |
| chr14 | 7795890  | 78086356 | 90467  | 4   | 3 | 6 | 0.93173516 | 0.01518174 | 11 | 0          | 0.94496889 |            |
| chr14 | 78086356 | 78177193 | 90828  | 3   | 3 | 6 | 0.93173516 | 0.00778066 | 12 | 0          | 1.17038931 |            |
| chr14 | 78177193 | 78186837 | 9645   | 2   | 3 | 6 | 0.93173516 | 0.0073523  | 13 | 0          | 1.42397267 |            |
| chr14 | 78186837 | 78269582 | 82746  | 3   | 2 | 6 | 0.6114001  | 0.00778066 | 12 | 0          | 1.17038931 |            |
| chr14 | 78269582 | 78297306 | 27725  | 1   | 1 | 6 | 0.30102999 | 0.00778066 | 12 | 0          | 1.17038931 |            |
| chr14 | 78297306 | 78324514 | 27209  | 1   | 1 | 6 | 0.30102999 | 0.01518174 | 10 | 0          | 0.94496889 |            |
| chr14 | 78324514 | 78365740 | 41227  | 2   | 2 | 6 | 0.6114001  | 0.01518174 | 11 | 0          | 0.94496889 |            |
| chr14 | 78365740 | 78365799 | 60     | 1   | 2 | 6 | 0.6114001  | 0.00778066 | 12 | 0          | 1.17038931 |            |
| chr14 | 78365799 | 78389188 | 23390  | 1   | 2 | 6 | 0.6114001  | 0.01518174 | 11 | 0          | 0.94496889 |            |
| chr14 | 78389188 | 78491789 | 102602 | 2   | 2 | 6 | 0.6114001  | 0.00778066 | 12 | 0          | 1.17038931 |            |
| chr14 | 78491789 | 78608852 | 117064 | 2   | 2 | 6 | 0.6114001  | 0.0073523  | 13 | 0          | 1.42397267 |            |
| chr14 | 78608852 | 78608911 | 60     | 1   | 2 | 6 | 0.6114001  | 6.86E-04   | 15 | 0          | 2.02387299 |            |
| chr14 | 78608911 | 78713005 | 104095 | 2   | 1 | 6 | 0.30102999 | 0.00166733 | 14 | 0          | 1.70763027 |            |
| chr14 | 78713005 | 78775453 | 62449  | 1   | 0 | 6 | 0          | 0.00778066 | 0  | 12         | 0          | 1.17038931 |
| chr14 | 78775453 | 78912062 | 136610 | 3   | 0 | 6 | 0          | 0.01518174 | 0  | 11         | 0          | 0.94496889 |
| chr14 | 78912062 | 78947163 | 35102  | 2   | 1 | 6 | 0.30102999 | 0.01518174 | 11 | 0          | 0.94496889 |            |
| chr14 | 78947163 | 79020923 | 73761  | 2   | 1 | 6 | 0.30102999 | 0.01320236 | 10 | 0          | 0.97390707 |            |
| chr14 | 79020923 | 79020982 | 60     | 1   | 1 | 6 | 0.30102999 | 0.02793176 | 10 | 0          | 0.74627054 |            |
| chr14 | 79020982 | 79113186 | 92205  | 2   | 1 | 6 | 0.30102999 | 0.04875589 | 9  | 0          | 0.57322208 |            |
| chr14 | 79113186 | 79268086 | 154901 | 3   | 0 | 6 | 0          | 0.04875589 | 0  | 9          | 0          | 0.57322208 |
| chr14 | 79268086 | 79268145 | 60     | 1   | 1 | 7 | 0.30102999 | 0.05232577 | 10 | 0          | 0.56314362 |            |
| chr14 | 79268145 | 79328171 | 60027  | 1   | 0 | 7 | 0          | 0.05232577 | 0  | 10         | 0          | 0.56314362 |
| chr14 | 79328171 | 79388255 | 60085  | 1   | 0 | 7 | 0          | 0.08584816 | 0  | 9          | 0          | 0.42015402 |
| chr14 | 79388255 | 79433698 | 45444  | 2   | 1 | 7 | 0.30102999 | 0.08584816 | 9  | 0          | 0.42015402 |            |
| chr14 | 79433698 | 79473346 | 39649  | 2   | 2 | 7 | 0.6114001  | 0.05232577 | 10 | 0          | 0.56314362 |            |
| chr14 | 79473346 | 79579273 | 105928 | 2   | 1 | 7 | 0.30102999 | 0.05232577 | 10 | 0          | 0.56314362 |            |
| chr14 | 79579273 | 79654105 | 74833  | 1   | 1 | 7 | 0.30102999 | 0.08584816 | 9  | 0          | 0.42015402 |            |
| chr14 | 79654105 | 79696315 | 42211  | 1   | 1 | 7 | 0.30102999 | 0.13499366 | 8  | 0          | 0.30102999 |            |
| chr14 | 79696315 | 79797125 | 108113 | 3   | 1 | 7 | 0.30102999 | 0.08584816 | 9  | 0          | 0.42015402 |            |
| chr14 | 79797125 | 79901832 | 104708 | 2   | 1 | 7 | 0.30102999 | 0.13499366 | 8  | 0          | 0.30102999 |            |
| chr14 | 79901832 | 79959206 | 57375  | 2   | 1 | 7 | 0.30102999 | 0.08584816 | 9  | 0          | 0.42015402 |            |
| chr14 | 79959206 | 80190330 | 231125 | 4</ |   |   |            |            |    |            |            |            |

|       |          |          |        |   |    |    |            |            |   |    |   |            |
|-------|----------|----------|--------|---|----|----|------------|------------|---|----|---|------------|
| chr14 | 81817319 | 81855662 | 38344  | 1 | 1  | 5  | 0.30102999 | 0.12309572 | 0 | 6  | 0 | 0.30102999 |
| chr14 | 81855662 | 81855721 | 60     | 1 | 1  | 7  | 0.30102999 | 0.30102999 | 0 | 6  | 0 | 0.129913   |
| chr14 | 81855721 | 82006501 | 150781 | 5 | 1  | 5  | 0.30102999 | 0.12309572 | 0 | 6  | 0 | 0.30102999 |
| chr14 | 82006501 | 82190951 | 184451 | 1 | 1  | 5  | 0.30102999 | 0.19510895 | 0 | 5  | 0 | 0.19510895 |
| chr14 | 82190951 | 82357749 | 166799 | 2 | 1  | 4  | 0.30102999 | 0.11390336 | 0 | 5  | 0 | 0.30102999 |
| chr14 | 82357749 | 82441728 | 83980  | 2 | 1  | 6  | 0.30102999 | 0.20064824 | 0 | 6  | 0 | 0.20064824 |
| chr14 | 82441728 | 82644877 | 203150 | 1 | 0  | 2  | 0          | 0.08289318 | 0 | 3  | 0 | 0.30102999 |
| chr14 | 82644877 | 82910736 | 265860 | 2 | 0  | 2  | 0          | 0.1575501  | 0 | 2  | 0 | 0.1575501  |
| chr14 | 82910736 | 82910795 | 60     | 1 | 1  | 4  | 0.30102999 | 0.47744371 | 0 | 2  | 0 | 0.0429175  |
| chr14 | 82910795 | 83418411 | 507617 | 4 | 1  | 0  | 0.30102999 | 0          | 0 | 1  | 0 | 0.30102999 |
| chr14 | 83418411 | 83497304 | 78894  | 1 | 0  | 0  | 0          | 0          | 0 | 0  | 0 | 0.30102999 |
| chr14 | 83497304 | 83980293 | 482990 | 4 | 0  | 1  | 0          | 0.1218695  | 0 | 1  | 0 | 0.1218695  |
| chr14 | 83980293 | 84092094 | 111802 | 2 | 0  | 2  | 0          | 0.30102999 | 0 | 1  | 0 | 0.05404976 |
| chr14 | 84092094 | 84202854 | 110761 | 1 | 0  | 1  | 0          | 0.30102999 | 0 | 0  | 0 | 0          |
| chr14 | 84202854 | 84316126 | 113273 | 2 | 0  | 0  | 0          | 0.1218695  | 0 | 1  | 0 | 0.1218695  |
| chr14 | 84316126 | 84933266 | 617141 | 5 | 0  | 1  | 0          | 0.30102999 | 0 | 0  | 0 | 0          |
| chr14 | 84933266 | 85098211 | 164946 | 2 | 0  | 1  | 0          | 0.1218695  | 0 | 1  | 0 | 0.1218695  |
| chr14 | 85098211 | 85234048 | 135838 | 2 | 0  | 5  | 0          | 0.30102999 | 0 | 4  | 0 | 0.11390336 |
| chr14 | 85234048 | 85234107 | 60     | 1 | 0  | 6  | 0          | 0.44141547 | 0 | 4  | 0 | 0.08713722 |
| chr14 | 85234107 | 85448855 | 214449 | 0 | 0  | 6  | 0          | 0.63695542 | 0 | 3  | 0 | 0.03070643 |
| chr14 | 85448855 | 85584636 | 136662 | 1 | 0  | 2  | 0          | 0.20469099 | 0 | 7  | 0 | 0.20469099 |
| chr14 | 85584636 | 85734402 | 149787 | 2 | 0  | 6  | 0          | 0.123913   | 0 | 7  | 0 | 0.30102999 |
| chr14 | 85734402 | 86141945 | 407544 | 6 | 0  | 0  | 0          | 0.47744371 | 0 | 2  | 0 | 0.0429175  |
| chr14 | 86141945 | 86380388 | 238444 | 3 | 0  | 4  | 0          | 0.30102999 | 0 | 3  | 0 | 0.10122019 |
| chr14 | 86380388 | 86590165 | 209778 | 1 | 0  | 1  | 0          | 0.1218695  | 0 | 1  | 0 | 0.1218695  |
| chr14 | 86590165 | 86801516 | 211352 | 2 | 0  | 2  | 0          | 0.30102999 | 0 | 1  | 0 | 0.05404976 |
| chr14 | 86801516 | 86933738 | 132223 | 2 | 0  | 3  | 0          | 0.51676182 | 0 | 1  | 0 | 0.02438896 |
| chr14 | 86933738 | 86933797 | 60     | 1 | 0  | 3  | 0          | 0.30102999 | 0 | 2  | 0 | 0.08289318 |
| chr14 | 87514040 | 87860006 | 345967 | 3 | 0  | 1  | 0          | 0.1218695  | 0 | 1  | 0 | 0.1218695  |
| chr14 | 87860006 | 87860065 | 60     | 1 | 0  | 3  | 0          | 0.30102999 | 0 | 2  | 0 | 0.08289318 |
| chr14 | 87860065 | 87998062 | 137998 | 1 | 0  | 3  | 0          | 0.51676182 | 0 | 1  | 0 | 0.02438896 |
| chr14 | 87998062 | 88288638 | 290577 | 4 | 0  | 6  | 0          | 0.30102999 | 0 | 5  | 0 | 0.12309572 |
| chr14 | 88288638 | 88365550 | 76913  | 2 | 0  | 7  | 0          | 0.30102999 | 0 | 6  | 0 | 0.129913   |
| chr14 | 88365550 | 88365609 | 60     | 1 | 0  | 7  | 0          | 0.05232577 | 0 | 10 | 0 | 0.56314362 |
| chr14 | 88365609 | 88621415 | 255807 | 6 | 0  | 7  | 0          | 0.20469099 | 0 | 7  | 0 | 0.20469099 |
| chr14 | 88621415 | 88693803 | 72389  | 3 | 0  | 7  | 0          | 0.08584816 | 0 | 9  | 0 | 0.42015402 |
| chr14 | 88693803 | 88725522 | 31720  | 2 | 0  | 7  | 0          | 0.05232577 | 0 | 10 | 0 | 0.56314362 |
| chr14 | 88725522 | 88872339 | 146818 | 3 | 0  | 7  | 0          | 0.08584816 | 0 | 9  | 0 | 0.42015402 |
| chr14 | 88872339 | 88893997 | 21659  | 1 | 0  | 7  | 0          | 0.13499366 | 0 | 8  | 0 | 0.30102999 |
| chr14 | 88893997 | 88903529 | 9533   | 2 | 1  | 7  | 0.30102999 | 0.13499366 | 0 | 8  | 0 | 0.30102999 |
| chr14 | 88903529 | 88951413 | 47885  | 1 | 0  | 7  | 0          | 0.13499366 | 0 | 8  | 0 | 0.30102999 |
| chr14 | 88951413 | 88951470 | 58     | 1 | 1  | 7  | 0.30102999 | 0.08584816 | 0 | 9  | 0 | 0.42015402 |
| chr14 | 88951470 | 89061396 | 109927 | 3 | 0  | 7  | 0          | 0.08584816 | 0 | 9  | 0 | 0.42015402 |
| chr14 | 89061396 | 89061455 | 60     | 1 | 1  | 7  | 0.30102999 | 0.03037338 | 0 | 11 | 0 | 0.73110763 |
| chr14 | 89061455 | 89172615 | 111161 | 2 | 1  | 7  | 0.30102999 | 0.08584816 | 0 | 9  | 0 | 0.42015402 |
| chr14 | 89172615 | 89220885 | 48271  | 2 | 1  | 8  | 0.30102999 | 0.08923391 | 0 | 10 | 0 | 0.4167287  |
| chr14 | 89220885 | 89305889 | 85005  | 3 | 1  | 10 | 0.30102999 | 0.14303407 | 0 | 11 | 0 | 0.30102999 |
| chr14 | 89305889 | 89341349 | 35461  | 2 | 1  | 10 | 0.30102999 | 0.21118145 | 0 | 10 | 0 | 0.21118145 |
| chr14 | 89341349 | 89341408 | 60     | 1 | 1  | 10 | 0.30102999 | 0.14303407 | 0 | 10 | 0 | 0.30102999 |
| chr14 | 89341408 | 89563203 | 221796 | 1 | 0  | 9  | 0          | 0.20975986 | 0 | 9  | 0 | 0.20975986 |
| chr14 | 89563203 | 89563262 | 60     | 1 | 1  | 9  | 0.30102999 | 0.14135546 | 0 | 9  | 0 | 0.30102999 |
| chr14 | 89563262 | 89627950 | 64689  | 1 | 0  | 8  | 0          | 0.08923391 | 0 | 10 | 0 | 0.4167287  |
| chr14 | 89627950 | 89690983 | 63034  | 2 | 1  | 8  | 0.30102999 | 0.08923391 | 0 | 10 | 0 | 0.4167287  |
| chr14 | 89690983 | 89691042 | 60     | 1 | 1  | 9  | 0.30102999 | 0.14135546 | 0 | 10 | 0 | 0.30102999 |
| chr14 | 89691042 | 89729437 | 38396  | 1 | 1  | 8  | 0.30102999 | 0.08923391 | 0 | 10 | 0 | 0.4167287  |
| chr14 | 89729437 | 89787164 | 57728  | 1 | 0  | 8  | 0          | 0.08923391 | 0 | 10 | 0 | 0.4167287  |
| chr14 | 89787164 | 89848825 | 61662  | 3 | 0  | 9  | 0          | 0.14135546 | 0 | 10 | 0 | 0.30102999 |
| chr14 | 89848825 | 89848884 | 60     | 1 | 0  | 9  | 0          | 0.09154957 | 0 | 11 | 0 | 0.41444892 |
| chr14 | 89848884 | 89879335 | 30452  | 1 | 0  | 9  | 0          | 0.14135546 | 0 | 10 | 0 | 0.30102999 |
| chr14 | 89879335 | 89879394 | 60     | 1 | 1  | 9  | 0.30102999 | 0.14135546 | 0 | 10 | 0 | 0.30102999 |
| chr14 | 89879394 | 89928396 | 49003  | 1 | 0  | 9  | 0          | 0.14135546 | 0 | 10 | 0 | 0.30102999 |
| chr14 | 89928396 | 89961841 | 33446  | 2 | 0  | 9  | 0          | 0.09154957 | 0 | 11 | 0 | 0.41444892 |
| chr14 | 89961841 | 89961900 | 60     | 1 | 0  | 10 | 0          | 0.0574087  | 0 | 13 | 0 | 0.5498098  |
| chr14 | 89961900 | 90017463 | 55564  | 1 | 0  | 9  | 0          | 0.0331093  | 0 | 13 | 0 | 0.71538971 |
| chr14 | 90017463 | 90043558 | 26096  | 2 | 0  | 9  | 0          | 0.03817691 | 0 | 14 | 0 | 0.90719478 |
| chr14 | 90043558 | 90043616 | 59     | 1 | 0  | 9  | 0          | 0.03817691 | 0 | 14 | 0 | 0.71538971 |
| chr14 | 90043616 | 90299508 | 255893 | 4 | 0  | 9  | 0          | 0.0331093  | 0 | 13 | 0 | 0.71538971 |
| chr14 | 90299508 | 90353123 | 53616  | 1 | 0  | 8  | 0          | 0.03209037 | 0 | 12 | 0 | 0.72198984 |
| chr14 | 90353123 | 90353182 | 60     | 1 | 0  | 8  | 0          | 0.01767679 | 0 | 13 | 0 | 0.91308053 |
| chr14 | 90353182 | 90397922 | 44741  | 1 | 0  | 8  | 0          | 0.05490675 | 0 | 11 | 0 | 0.55623409 |
| chr14 | 90397922 | 90397981 | 60     | 1 | 0  | 8  | 0          | 0.03209037 | 0 | 12 | 0 | 0.72198984 |
| chr14 | 90397981 | 90424066 | 26086  | 1 | 0  | 8  | 0          | 0.05490675 | 0 | 11 | 0 | 0.55623409 |
| chr14 | 90424066 | 90424125 | 60     | 1 | 0  | 9  | 0          | 0.0565833  | 0 | 12 | 0 | 0.55190077 |
| chr14 | 90424125 | 90487797 | 63673  | 2 | 0  | 9  | 0          | 0.09154957 | 0 | 11 | 0 | 0.41444892 |
| chr14 | 90487797 | 90509644 | 21848  | 2 | 0  | 9  | 0          | 0.0331093  | 0 | 13 | 0 | 0.71538971 |
| chr14 | 90509644 | 90652284 | 142641 | 5 | 0  | 9  | 0          | 0.09154957 | 0 | 11 | 0 | 0.41444892 |
| chr14 | 90652284 | 90725028 | 72745  | 2 | 0  | 9  | 0          | 0.14135546 | 0 | 10 | 0 | 0.30102999 |
| chr14 | 90725028 | 90725087 | 60     | 1 | 1  | 10 | 0.30102999 | 0.09290028 | 0 | 12 | 0 | 0.41314172 |
| chr14 | 90725087 | 90761932 | 36846  | 2 | 1  | 9  | 0.30102999 | 0.09154957 | 0 | 11 | 0 | 0.41444892 |
| chr14 | 90761932 | 90779147 | 17216  | 2 | 1  | 9  | 0.30102999 | 0.0565833  | 0 | 12 | 0 | 0.55190077 |
| chr14 | 90779147 | 90867813 | 88667  | 2 | 0  | 9  | 0          | 0.0565833  | 0 | 12 | 0 | 0.55190077 |
| chr14 | 90867813 | 90969753 | 101941 | 1 | 0  | 9  | 0          | 0.09154957 | 0 | 11 | 0 | 0.41444892 |
| chr14 | 90969753 | 91040961 | 71209  | 2 | 0  | 10 | 0          | 0.14303407 | 0 | 11 | 0 | 0.30102999 |
| chr14 | 91040961 | 91072270 | 31310  | 1 | 0  | 9  | 0          | 0.09154957 | 0 | 11 | 0 | 0.41444892 |
| chr14 | 91072270 | 91122023 | 49754  | 1 | 0  | 9  | 0          | 0.14135546 | 0 | 10 | 0 | 0.30102999 |
| chr14 | 91122023 | 91158867 | 36845  | 2 | 0  | 10 | 0          | 0.21118145 | 0 | 10 | 0 | 0.21118145 |
| chr14 | 91158867 | 91158926 | 60     | 1 | 0  | 11 | 0          | 0.21200206 | 0 | 11 | 0 | 0.21200206 |
| chr14 | 91158926 | 91409392 | 250467 | 5 | 0  | 10 | 0          | 0.14303407 | 0 | 11 | 0 | 0.30102999 |
| chr14 | 91409392 | 91409451 | 60     | 1 | 11 | 0  | 0          | 0.21200206 | 0 | 11 | 0 | 0.21200206 |
| chr14 | 91409451 | 91444645 | 35195  | 1 | 0  | 8  | 0          | 0.05490675 | 0 | 11 | 0 | 0.55623409 |
| chr14 | 91444645 | 91580836 | 136192 | 5 | 0  | 8  | 0.30102999 | 0.05490675 | 0 | 11 | 0 | 0.55623409 |
| chr14 | 91580836 | 91626745 | 45910  | 2 | 1  | 9  | 0.30102999 | 0.09154957 | 0 | 11 | 0 | 0.41444892 |
| chr14 | 91626745 | 91702287 | 75543  | 3 | 0  | 9  | 0.30102999 | 0.14135546 | 0 | 10 | 0 | 0.30102999 |
| chr14 | 91702287 | 91747435 | 45149  | 1 | 1  | 7  | 0.30102999 | 0.08584816 | 0 | 9  | 0 | 0.42015402 |
| chr14 | 91747435 | 91851270 | 103836 | 2 | 1  | 7  | 0.30102999 | 0.13499366 | 0 | 8  | 0 | 0.30102999 |
| chr14 | 91851270 | 91851329 | 60     | 1 | 1  | 7  | 0.30102999 | 0.05232577 | 0 | 9  | 0 | 0.56314362 |
| chr14 | 91851329 | 91963189 | 111861 | 2 | 1  | 5  | 0.30102999 | 0.02473314 | 0 | 9  | 0 | 0.76806864 |
| chr14 | 91963189 | 91963248 | 60     | 1 | 1  | 7  | 0.30102999 | 0.05232577 | 0 | 9  | 0 | 0.56314362 |
| chr14 | 91963248 | 92074684 | 111437 | 2 | 1  | 7  | 0.30102999 | 0.08584816 | 0 | 9  | 0 | 0.42015402 |
| chr14 | 92074684 | 92074743 | 60     | 1 | 1  | 8  | 0.30102999 | 0.08923391 | 0 | 10 | 0 | 0          |

|       |           |           |        |    |   |    |            |            |   |    |            |            |
|-------|-----------|-----------|--------|----|---|----|------------|------------|---|----|------------|------------|
| chr14 | 94086079  | 94135586  | 49508  | 2  | 0 | 8  | 0          | 0.20764654 | 1 | 8  | 0.30102999 | 0.20764654 |
| chr14 | 94135586  | 94220976  | 85391  | 2  | 0 | 8  | 0          | 0.30102999 | 1 | 7  | 0.30102999 | 0.13499366 |
| chr14 | 94220976  | 94247786  | 26811  | 2  | 0 | 8  | 0          | 0.20764654 | 1 | 8  | 0.30102999 | 0.20764654 |
| chr14 | 94247786  | 94395961  | 148176 | 4  | 0 | 8  | 0          | 0.08923391 | 1 | 10 | 0.30102999 | 0.4167287  |
| chr14 | 94395961  | 94419599  | 23639  | 1  | 0 | 7  | 0          | 0.08584816 | 1 | 9  | 0.30102999 | 0.42015402 |
| chr14 | 94419599  | 94503722  | 84124  | 2  | 0 | 7  | 0          | 0.08584816 | 0 | 9  | 0          | 0.42015402 |
| chr14 | 94503722  | 94503781  | 60     | 1  | 0 | 9  | 0          | 0.14135546 | 1 | 10 | 0.30102999 | 0.30102999 |
| chr14 | 94503781  | 94551847  | 48067  | 2  | 0 | 8  | 0          | 0.13872638 | 0 | 9  | 0          | 0.30102999 |
| chr14 | 94551847  | 94551906  | 60     | 1  | 0 | 9  | 0          | 0.20975986 | 0 | 9  | 0          | 0.20975986 |
| chr14 | 94551906  | 94594176  | 42271  | 2  | 0 | 8  | 0          | 0.13872638 | 0 | 9  | 0          | 0.30102999 |
| chr14 | 94594176  | 94775715  | 181540 | 4  | 0 | 8  | 0          | 0.20764654 | 0 | 8  | 0          | 0.20764654 |
| chr14 | 94775715  | 94894552  | 118838 | 3  | 0 | 8  | 0          | 0.30102999 | 0 | 7  | 0          | 0.13499366 |
| chr14 | 94894552  | 94894611  | 60     | 1  | 0 | 8  | 0          | 0.20764654 | 0 | 8  | 0          | 0.20764654 |
| chr14 | 94894611  | 95048533  | 153923 | 3  | 0 | 8  | 0          | 0.30102999 | 0 | 7  | 0          | 0.13499366 |
| chr14 | 95048533  | 95085990  | 37458  | 3  | 0 | 9  | 0          | 0.20975986 | 0 | 9  | 0          | 0.20975986 |
| chr14 | 95085990  | 95113121  | 27132  | 2  | 0 | 8  | 0          | 0.13872638 | 0 | 9  | 0          | 0.30102999 |
| chr14 | 95113121  | 95113180  | 60     | 1  | 0 | 9  | 0          | 0.20975986 | 0 | 9  | 0          | 0.20975986 |
| chr14 | 95113180  | 95234749  | 121570 | 1  | 0 | 9  | 0          | 0.30102999 | 0 | 8  | 0          | 0.13872638 |
| chr14 | 95234749  | 95358516  | 123768 | 2  | 0 | 9  | 0          | 0.14135546 | 0 | 10 | 0          | 0.30102999 |
| chr14 | 95358516  | 95358575  | 60     | 1  | 0 | 9  | 0          | 0.0565933  | 0 | 12 | 0          | 0.55190077 |
| chr14 | 95358575  | 95474018  | 115444 | 1  | 0 | 11 | 0          | 0.09154957 | 0 | 11 | 0          | 0.4144892  |
| chr14 | 95474018  | 95573978  | 99959  | 1  | 0 | 8  | 0          | 0.08923391 | 0 | 10 | 0          | 0.4167287  |
| chr14 | 95573978  | 95713236  | 139261 | 3  | 0 | 7  | 0          | 0.05232577 | 0 | 10 | 0          | 0.56314362 |
| chr14 | 95713236  | 95740974  | 2729   | 2  | 0 | 7  | 0          | 0.03037338 | 0 | 11 | 0          | 0.73110763 |
| chr14 | 95740974  | 95741033  | 60     | 1  | 0 | 7  | 0          | 0.00859896 | 0 | 13 | 0          | 1.14735594 |
| chr14 | 95741033  | 95784280  | 43248  | 1  | 0 | 7  | 0          | 0.03037338 | 0 | 11 | 0          | 0.73110763 |
| chr14 | 95784280  | 95848957  | 64678  | 1  | 0 | 7  | 0          | 0.05232577 | 0 | 10 | 0          | 0.56314362 |
| chr14 | 95848957  | 95874684  | 25728  | 2  | 0 | 7  | 0          | 0.03037338 | 0 | 11 | 0          | 0.73110763 |
| chr14 | 95874684  | 95905454  | 30771  | 2  | 0 | 7  | 0          | 0.01667721 | 0 | 12 | 0          | 0.92532268 |
| chr14 | 95905454  | 96005851  | 100398 | 2  | 0 | 7  | 0          | 0.03037338 | 0 | 11 | 0          | 0.73110763 |
| chr14 | 96005851  | 96005910  | 60     | 1  | 0 | 7  | 0          | 0.00859896 | 1 | 13 | 0.30102999 | 1.14735594 |
| chr14 | 96005910  | 96130086  | 124177 | 2  | 0 | 7  | 0          | 0.03037338 | 1 | 11 | 0.30102999 | 0.73110763 |
| chr14 | 96130086  | 96158444  | 28359  | 4  | 0 | 7  | 0          | 0.01667721 | 1 | 12 | 0.30102999 | 0.92532268 |
| chr14 | 96158444  | 96179664  | 21221  | 2  | 0 | 7  | 0          | 0.03037338 | 1 | 11 | 0.30102999 | 0.73110763 |
| chr14 | 96179664  | 96301701  | 122038 | 1  | 0 | 7  | 0          | 0.05232577 | 1 | 10 | 0.30102999 | 0.56314362 |
| chr14 | 96301701  | 96848753  | 547053 | 10 | 0 | 7  | 0          | 0.03037338 | 1 | 11 | 0.30102999 | 0.73110763 |
| chr14 | 96848753  | 96949138  | 100386 | 3  | 0 | 6  | 0          | 0.01518174 | 1 | 11 | 0.30102999 | 0.9449689  |
| chr14 | 96949138  | 97046972  | 97835  | 3  | 0 | 6  | 0          | 0.02793176 | 1 | 10 | 0.30102999 | 0.74627054 |
| chr14 | 97046972  | 97277881  | 230910 | 2  | 0 | 6  | 0          | 0.04875589 | 1 | 9  | 0.30102999 | 0.5732208  |
| chr14 | 97277881  | 97299936  | 22056  | 2  | 0 | 6  | 0          | 0.01518174 | 1 | 11 | 0.30102999 | 0.9449689  |
| chr14 | 97299936  | 97367944  | 68009  | 2  | 0 | 5  | 0          | 0.07511598 | 1 | 7  | 0.30102999 | 0.43181735 |
| chr14 | 97367944  | 97368003  | 60     | 1  | 0 | 6  | 0          | 0.02793176 | 1 | 10 | 0.30102999 | 0.74627054 |
| chr14 | 97368003  | 97368008  | 26806  | 1  | 0 | 4  | 0          | 0.06713722 | 1 | 6  | 0.30102999 | 0.44141547 |
| chr14 | 97368008  | 97910619  | 273812 | 2  | 0 | 2  | 0          | 0.02162467 | 1 | 5  | 0.30102999 | 0.68214471 |
| chr14 | 97910619  | 97978451  | 67833  | 2  | 0 | 4  | 0          | 0.05670724 | 1 | 5  | 0.30102999 | 0.45545077 |
| chr14 | 97978451  | 98228630  | 250180 | 4  | 0 | 3  | 0          | 0.10122019 | 1 | 4  | 0.30102999 | 0.30102999 |
| chr14 | 98228630  | 98228689  | 60     | 1  | 0 | 4  | 0          | 0.18734596 | 1 | 4  | 0.30102999 | 0.18734596 |
| chr14 | 98228689  | 98366577  | 137889 | 1  | 0 | 3  | 0          | 0.17593012 | 1 | 3  | 0.30102999 | 0.17593012 |
| chr14 | 98366577  | 98622406  | 255830 | 2  | 0 | 2  | 0          | 0.08289118 | 1 | 3  | 0.30102999 | 0.30102999 |
| chr14 | 98622406  | 98759719  | 137314 | 1  | 0 | 2  | 0          | 0.1575501  | 1 | 2  | 0.30102999 | 0.1575501  |
| chr14 | 98759719  | 98972270  | 212552 | 3  | 0 | 2  | 0          | 0.0429175  | 1 | 4  | 0.30102999 | 0.47744371 |
| chr14 | 98972270  | 98972329  | 60     | 1  | 0 | 3  | 0          | 0.03070643 | 1 | 6  | 0.30102999 | 0.63695542 |
| chr14 | 98972329  | 99152010  | 179682 | 1  | 0 | 3  | 0          | 0.10122019 | 1 | 4  | 0.30102999 | 0.30102999 |
| chr14 | 99152010  | 99180936  | 28927  | 2  | 1 | 5  | 0.1218695  | 0.30102999 | 1 | 4  | 0.1218695  | 0.11390336 |
| chr14 | 99180936  | 99513045  | 332110 | 4  | 2 | 5  | 0.30102999 | 0.30102999 | 1 | 4  | 0.05404976 | 0.11390336 |
| chr14 | 99513045  | 99634561  | 121517 | 2  | 2 | 6  | 0.30102999 | 0.129913   | 1 | 7  | 0.05404976 | 0.30102999 |
| chr14 | 99634561  | 99638230  | 3670   | 2  | 2 | 6  | 0.30102999 | 0.08122616 | 1 | 8  | 0.05404976 | 0.4250187  |
| chr14 | 99638230  | 99813665  | 175436 | 4  | 2 | 6  | 0.30102999 | 0.129913   | 1 | 7  | 0.05404976 | 0.30102999 |
| chr14 | 99813665  | 99898286  | 84622  | 4  | 2 | 6  | 0.30102999 | 0.08122616 | 1 | 8  | 0.05404976 | 0.4250187  |
| chr14 | 99898286  | 100052963 | 154678 | 4  | 2 | 7  | 0.30102999 | 0.13499366 | 1 | 8  | 0.05404976 | 0.30102999 |
| chr14 | 100052963 | 100095713 | 42751  | 2  | 2 | 7  | 0.30102999 | 0.08584816 | 1 | 9  | 0.05404976 | 0.42015402 |
| chr14 | 100095713 | 100260674 | 164962 | 4  | 2 | 7  | 0.30102999 | 0.13499366 | 1 | 8  | 0.05404976 | 0.30102999 |
| chr14 | 100260674 | 100260733 | 60     | 1  | 2 | 7  | 0.1575501  | 0.13499366 | 2 | 8  | 0.1575501  | 0.30102999 |
| chr14 | 100260733 | 100359078 | 98246  | 2  | 2 | 7  | 0.30102999 | 0.13499366 | 1 | 8  | 0.05404976 | 0.30102999 |
| chr14 | 100359078 | 100376566 | 17489  | 2  | 2 | 7  | 0.1575501  | 0.13499366 | 2 | 8  | 0.1575501  | 0.30102999 |
| chr14 | 100376566 | 100508222 | 131657 | 5  | 2 | 8  | 0.1575501  | 0.20764654 | 2 | 8  | 0.1575501  | 0.20764654 |
| chr14 | 100508222 | 100532229 | 23999  | 2  | 2 | 9  | 0.1575501  | 0.30102999 | 2 | 8  | 0.1575501  | 0.13872638 |
| chr14 | 100532229 | 100532279 | 60     | 1  | 2 | 9  | 0.1575501  | 0.14135546 | 2 | 10 | 0.1575501  | 0.30102999 |
| chr14 | 100532279 | 100640420 | 108142 | 4  | 2 | 7  | 0.1575501  | 0.08584816 | 2 | 9  | 0.1575501  | 0.42015402 |
| chr14 | 100640420 | 100640479 | 60     | 1  | 2 | 7  | 0.1575501  | 0.05232577 | 2 | 10 | 0.1575501  | 0.56314362 |
| chr14 | 100640479 | 100809813 | 169325 | 6  | 2 | 7  | 0.1575501  | 0.08584816 | 2 | 9  | 0.1575501  | 0.42015402 |
| chr14 | 100809813 | 101003974 | 194162 | 5  | 2 | 7  | 0.1575501  | 0.13499366 | 2 | 8  | 0.1575501  | 0.30102999 |
| chr14 | 101003974 | 101028367 | 24394  | 2  | 2 | 7  | 0.1575501  | 0.08584816 | 2 | 9  | 0.1575501  | 0.42015402 |
| chr14 | 101028367 | 101028426 | 60     | 1  | 2 | 7  | 0.1575501  | 0.05232577 | 2 | 10 | 0.1575501  | 0.56314362 |
| chr14 | 101028426 | 101109655 | 81230  | 1  | 2 | 7  | 0.1575501  | 0.08584816 | 2 | 9  | 0.1575501  | 0.42015402 |
| chr14 | 101109655 | 101109714 | 60     | 1  | 2 | 7  | 0.1575501  | 0.05232577 | 2 | 10 | 0.1575501  | 0.56314362 |
| chr14 | 101109714 | 101197697 | 87984  | 2  | 2 | 7  | 0.1575501  | 0.08584816 | 2 | 9  | 0.1575501  | 0.42015402 |
| chr14 | 101197697 | 101289600 | 91904  | 4  | 2 | 7  | 0.1575501  | 0.05232577 | 2 | 10 | 0.1575501  | 0.56314362 |
| chr14 | 101289600 | 101331163 | 41564  | 3  | 2 | 7  | 0.1575501  | 0.03037338 | 2 | 11 | 0.1575501  | 0.73110763 |
| chr14 | 101331163 | 101365273 | 34111  | 2  | 2 | 7  | 0.1575501  | 0.05232577 | 2 | 10 | 0.1575501  | 0.56314362 |
| chr14 | 101365273 | 101386431 | 21159  | 1  | 2 | 7  | 0.1575501  | 0.08584816 | 2 | 9  | 0.1575501  | 0.42015402 |
| chr14 | 101386431 | 101410904 | 24474  | 1  | 2 | 6  | 0.1575501  | 0.04875589 | 2 | 9  | 0.1575501  | 0.5732208  |
| chr14 | 101410904 | 101475642 | 64739  | 1  | 2 | 6  | 0.1575501  | 0.08122616 | 2 | 8  | 0.1575501  | 0.4250187  |
| chr14 | 101475642 | 101538139 | 62498  | 5  | 2 | 6  | 0.1575501  | 0.04875589 | 2 | 9  | 0.1575501  | 0.5732208  |
| chr14 | 101538139 | 101563623 | 25485  | 1  | 2 | 6  | 0.1575501  | 0.08122616 | 2 | 8  | 0.1575501  | 0.4250187  |
| chr14 | 101563623 | 101697865 | 134243 | 2  | 2 | 6  | 0.08289118 | 0.08122616 | 3 | 8  | 0.30102999 | 0.4250187  |
| chr14 | 101697865 | 101697924 | 60     | 1  | 2 | 7  | 0.08289118 | 0.13499366 | 3 | 8  | 0.30102999 | 0.30102999 |
| chr14 | 101697924 | 101847855 | 149932 | 1  | 2 | 6  | 0.1575501  | 0.08122616 | 2 | 8  | 0.1575501  | 0.4250187  |
| chr14 | 101847855 | 102000488 | 152634 | 1  | 2 | 6  | 0.05404976 | 0.129913   | 2 | 7  | 0.30102999 | 0.30102999 |
| chr14 | 102000488 | 102023622 | 23135  | 2  | 1 | 7  | 0.05404976 | 0.20469099 | 2 | 7  | 0.30102999 | 0.20469099 |
| chr14 | 102023622 | 102028045 | 4424   | 2  | 1 | 7  | 0.1575501  | 0.13499366 | 2 | 8  | 0.1575501  | 0.30102999 |
| chr14 | 102028045 | 102044665 | 16621  | 1  | 2 | 7  | 0.1575501  | 0.20469099 | 2 | 7  | 0.1575501  | 0.20469099 |
| chr14 | 102044665 | 102044724 | 60     | 1  | 2 | 7  | 0.08289118 | 0.20469099 | 3 | 7  | 0.30102999 | 0.20469099 |
| chr14 | 102044724 | 102131998 | 87275  | 2  | 1 | 7  | 0.05404976 | 0.20469099 | 2 | 7  |            |            |

|       |           |           |        |   |   |   |            |            |   |    |            |            |
|-------|-----------|-----------|--------|---|---|---|------------|------------|---|----|------------|------------|
| chr14 | 103871620 | 103923455 | 51836  | 2 | 1 | 7 | 0.1218695  | 0.08584816 | 1 | 9  | 0.1218695  | 0.42015402 |
| chr14 | 103923455 | 103923514 | 60     | 1 | 1 | 7 | 0.1218695  | 0.01667721 | 1 | 12 | 0.1218695  | 0.92532268 |
| chr14 | 103923514 | 104030894 | 107381 | 5 | 1 | 7 | 0.1218695  | 0.08584816 | 1 | 9  | 0.1218695  | 0.42015402 |
| chr14 | 104030894 | 104121011 | 90118  | 2 | 1 | 6 | 0.1218695  | 0.04875589 | 1 | 9  | 0.1218695  | 0.5732208  |
| chr14 | 104121011 | 104121070 | 60     | 1 | 2 | 7 | 0.30102999 | 0.03037338 | 1 | 11 | 0.05404976 | 0.73110763 |
| chr14 | 104121070 | 104199796 | 78727  | 3 | 2 | 6 | 0.30102999 | 0.02793176 | 1 | 10 | 0.05404976 | 0.74627054 |
| chr14 | 104199796 | 104199848 | 53     | 1 | 2 | 6 | 0.30102999 | 0.01518174 | 1 | 11 | 0.05404976 | 0.9449689  |
| chr14 | 104199848 | 104263770 | 63923  | 2 | 2 | 6 | 0.30102999 | 0.04875589 | 1 | 9  | 0.05404976 | 0.5732208  |
| chr14 | 104263770 | 104263828 | 59     | 1 | 2 | 7 | 0.1575501  | 0.01667721 | 2 | 12 | 0.1575501  | 0.92532268 |
| chr14 | 104263828 | 104306502 | 42675  | 1 | 2 | 6 | 0.1575501  | 0.00778066 | 2 | 12 | 0.1575501  | 1.17038931 |
| chr14 | 104306502 | 104387328 | 80827  | 3 | 2 | 4 | 0.1575501  | 0.03812622 | 2 | 7  | 0.1575501  | 0.60763643 |
| chr14 | 104387328 | 104423456 | 36129  | 1 | 2 | 4 | 0.1575501  | 0.06713722 | 2 | 6  | 0.1575501  | 0.44141547 |
| chr14 | 104423456 | 104423515 | 60     | 1 | 2 | 5 | 0.1575501  | 0.02473314 | 2 | 9  | 0.1575501  | 0.76806864 |
| chr14 | 104423515 | 104491785 | 68271  | 2 | 2 | 4 | 0.1575501  | 0.03812622 | 2 | 7  | 0.1575501  | 0.60763643 |
| chr14 | 104491785 | 104564554 | 72770  | 1 | 2 | 4 | 0.1575501  | 0.06713722 | 2 | 6  | 0.1575501  | 0.44141547 |
| chr14 | 104564554 | 104581489 | 16936  | 2 | 2 | 5 | 0.1575501  | 0.07511598 | 2 | 6  | 0.1575501  | 0.43181735 |
| chr14 | 104581489 | 104635981 | 54493  | 2 | 2 | 5 | 0.1575501  | 0.12309572 | 2 | 6  | 0.1575501  | 0.30102999 |
| chr14 | 104635981 | 104780311 | 144331 | 2 | 2 | 4 | 0.1575501  | 0.06713722 | 2 | 6  | 0.1575501  | 0.44141547 |
| chr14 | 104780311 | 104780370 | 60     | 1 | 3 | 4 | 0.30102999 | 0.03812622 | 2 | 7  | 0.08289318 | 0.60763643 |
| chr14 | 104780370 | 104837235 | 56866  | 1 | 3 | 4 | 0.30102999 | 0.06713722 | 2 | 6  | 0.08289318 | 0.44141547 |
| chr14 | 104837235 | 104837294 | 60     | 1 | 3 | 4 | 0.30102999 | 0.03812622 | 2 | 6  | 0.08289318 | 0.60763643 |
| chr14 | 104837294 | 104913869 | 76576  | 1 | 3 | 3 | 0.30102999 | 0.01598258 | 2 | 7  | 0.08289318 | 0.84395715 |
| chr14 | 104913869 | 104913928 | 60     | 1 | 3 | 4 | 0.30102999 | 0.03812622 | 2 | 7  | 0.08289318 | 0.60763643 |
| chr14 | 104913928 | 104988519 | 74592  | 1 | 3 | 3 | 0.30102999 | 0.01598258 | 2 | 7  | 0.08289318 | 0.84395715 |
| chr14 | 104988519 | 105052722 | 64204  | 2 | 3 | 5 | 0.30102999 | 0.07511598 | 2 | 7  | 0.08289318 | 0.43181735 |
| chr14 | 105052722 | 105112791 | 60070  | 2 | 3 | 6 | 0.47744371 | 0.129913   | 2 | 7  | 0.0429175  | 0.30102999 |
| chr14 | 105112791 | 105213515 | 100725 | 4 | 4 | 6 | 0.47744371 | 0.20064824 | 2 | 6  | 0.0429175  | 0.20064824 |
| chr14 | 105213515 | 105257533 | 44019  | 5 | 4 | 5 | 0.47744371 | 0.12309572 | 2 | 6  | 0.0429175  | 0.30102999 |
| chr14 | 105257533 | 105283384 | 25852  | 1 | 4 | 4 | 0.47744371 | 0.06713722 | 2 | 6  | 0.0429175  | 0.44141547 |
| chr14 | 105283384 | 105363229 | 79846  | 1 | 3 | 3 | 0.30102999 | 0.03070643 | 2 | 6  | 0.08289318 | 0.63695542 |
| chr14 | 105363229 | 105363288 | 60     | 1 | 3 | 5 | 0.30102999 | 0.12309572 | 2 | 6  | 0.08289318 | 0.30102999 |
| chr14 | 105363288 | 105394910 | 31623  | 1 | 3 | 4 | 0.30102999 | 0.06713722 | 2 | 6  | 0.08289318 | 0.44141547 |
| chr14 | 105394910 | 105394957 | 48     | 1 | 5 | 4 | 0.68214471 | 0.03812622 | 2 | 7  | 0.02162467 | 0.60763643 |
| chr14 | 105394957 | 105401195 | 6239   | 1 | 3 | 4 | 0.30102999 | 0.06713722 | 2 | 6  | 0.08289318 | 0.44141547 |
| chr14 | 105401195 | 105481194 | 80000  | 1 | 3 | 3 | 0.30102999 | 0.03070643 | 2 | 6  | 0.08289318 | 0.63695542 |
| chr14 | 105481194 | 105585383 | 104190 | 3 | 4 | 3 | 0.47744371 | 0.01598258 | 2 | 7  | 0.0429175  | 0.84395715 |
| chr14 | 105585383 | 105585442 | 60     | 1 | 4 | 3 | 0.30102999 | 0.01598258 | 3 | 7  | 0.10122019 | 0.84395715 |
| chr14 | 105585442 | 105692441 | 107000 | 3 | 3 | 3 | 0.17593012 | 0.03070643 | 3 | 6  | 0.17593012 | 0.63695542 |
| chr14 | 105692441 | 105692495 | 55     | 1 | 4 | 3 | 0.30102999 | 0.01598258 | 3 | 7  | 0.10122019 | 0.84395715 |
| chr14 | 105692495 | 105757724 | 65230  | 3 | 3 | 3 | 0.30102999 | 0.01598258 | 2 | 7  | 0.08289318 | 0.84395715 |
| chr14 | 105757724 | 105847750 | 90027  | 2 | 2 | 3 | 0.1575501  | 0.03070643 | 2 | 6  | 0.1575501  | 0.63695542 |
| chr14 | 105847750 | 105890101 | 42352  | 2 | 3 | 3 | 0.30102999 | 0.03070643 | 2 | 6  | 0.08289318 | 0.63695542 |
| chr14 | 105890101 | 105891240 | 1140   | 2 | 3 | 4 | 0.30102999 | 0.06713722 | 2 | 6  | 0.08289318 | 0.44141547 |
| chr14 | 105891240 | 105929852 | 38613  | 2 | 3 | 3 | 0.30102999 | 0.03070643 | 2 | 6  | 0.08289318 | 0.63695542 |
| chr14 | 105929852 | 105957393 | 27542  | 3 | 3 | 4 | 0.30102999 | 0.06713722 | 2 | 6  | 0.08289318 | 0.44141547 |
| chr14 | 105957393 | 106009354 | 51962  | 3 | 2 | 4 | 0.1575501  | 0.06713722 | 2 | 6  | 0.1575501  | 0.44141547 |
| chr14 | 106009354 | 106361528 | 352175 | 3 | 1 | 4 | 0.1218695  | 0.18734596 | 1 | 4  | 0.1218695  | 0.18734596 |
| chr14 | 106361528 | 106512963 | 151436 | 4 | 1 | 4 | 0.1218695  | 0.30102999 | 1 | 3  | 0.1218695  | 0.10122019 |
| chr14 | 106512963 | 106513022 | 60     | 1 | 1 | 4 | 0.1218695  | 0.18734596 | 1 | 4  | 0.1218695  | 0.18734596 |
| chr14 | 106513022 | 106665119 | 152098 | 2 | 1 | 4 | 0.30102999 | 0.30102999 | 0 | 3  | 0          | 0.10122019 |
| chr14 | 106665119 | 106716345 | 51227  | 2 | 1 | 5 | 0.30102999 | 0.45545077 | 0 | 3  | 0          | 0.05670724 |
| chr14 | 106716345 | 106716404 | 60     | 1 | 1 | 5 | 0.30102999 | 0.30102999 | 0 | 4  | 0          | 0.11390336 |
| chr14 | 106716404 | 106803248 | 86845  | 2 | 1 | 3 | 0.30102999 | 0.51676182 | 0 | 0  | 0          | 0.02438896 |
| chr14 | 106803248 | 106906960 | 103713 | 3 | 1 | 5 | 0.30102999 | 0.45545077 | 0 | 3  | 0          | 0.05670724 |
| chr14 | 106906960 | 107258824 | 351865 | 7 | 1 | 3 | 0.30102999 | 0.30102999 | 0 | 2  | 0          | 0.08289318 |
| chr15 | 21939652  | 21939711  | 60     | 1 | 0 | 5 | 0          | 0.19510895 | 0 | 5  | 0          | 0.19510895 |
| chr15 | 21939711  | 22111908  | 172198 | 1 | 0 | 3 | 0          | 0.05670724 | 0 | 5  | 0          | 0.45545077 |
| chr15 | 22111908  | 22866888  | 754981 | 9 | 0 | 3 | 0          | 0.03070643 | 0 | 6  | 0          | 0.63695542 |
| chr15 | 22866888  | 22885696  | 18809  | 3 | 0 | 5 | 0          | 0.12309572 | 0 | 6  | 0          | 0.30102999 |
| chr15 | 22885696  | 23066778  | 181083 | 6 | 0 | 4 | 0          | 0.06713722 | 0 | 0  | 0          | 0.44141547 |
| chr15 | 23066778  | 23085096  | 18319  | 3 | 0 | 7 | 0          | 0.20469099 | 0 | 0  | 0          | 0.20469099 |
| chr15 | 23085096  | 23132102  | 47007  | 1 | 0 | 4 | 0          | 0.03812622 | 0 | 7  | 0          | 0.60763643 |
| chr15 | 23132102  | 23179889  | 47788  | 1 | 0 | 3 | 0          | 0.01598258 | 0 | 7  | 0          | 0.84395715 |
| chr15 | 23179889  | 23179948  | 60     | 1 | 0 | 3 | 0          | 0.0079614  | 0 | 8  | 0          | 1.07548421 |
| chr15 | 23179948  | 23699701  | 519754 | 3 | 0 | 3 | 0          | 0          | 0 | 0  | 0          | 0.84395715 |
| chr15 | 23699701  | 23813348  | 113648 | 1 | 0 | 6 | 0          | 0.01598258 | 2 | 9  | 0.61140001 | 0.5732208  |
| chr15 | 23813348  | 23858549  | 45202  | 1 | 0 | 5 | 0          | 0.04407651 | 2 | 8  | 0.61140001 | 0.84395715 |
| chr15 | 23858549  | 23889744  | 31196  | 1 | 0 | 5 | 0          | 0.07511598 | 2 | 7  | 0.61140001 | 0.43181735 |
| chr15 | 23889744  | 23930760  | 41017  | 1 | 0 | 5 | 0          | 0.12309572 | 2 | 6  | 0.61140001 | 0.30102999 |
| chr15 | 23930760  | 24026406  | 95647  | 1 | 0 | 2 | 0          | 0.02162467 | 2 | 5  | 0.61140001 | 0.68214471 |
| chr15 | 24026406  | 24026465  | 60     | 1 | 0 | 2 | 0          | 0.02162467 | 2 | 5  | 0.93173516 | 0.68214471 |
| chr15 | 24026465  | 24058973  | 32509  | 1 | 0 | 2 | 0          | 0.0429175  | 1 | 4  | 0.30102999 | 0.47744371 |
| chr15 | 24058973  | 24209396  | 150424 | 2 | 1 | 0 | 0          | 0.05404976 | 1 | 2  | 0.30102999 | 0.30102999 |
| chr15 | 24209396  | 24305019  | 95624  | 1 | 0 | 1 | 0          | 0.05404976 | 1 | 0  | 0          | 0.30102999 |
| chr15 | 24305019  | 24431653  | 126635 | 2 | 0 | 1 | 0          | 0.02438896 | 0 | 3  | 0          | 0.51676182 |
| chr15 | 24431653  | 24668239  | 236587 | 2 | 0 | 1 | 0          | 0.00478937 | 0 | 0  | 0          | 1.02643191 |
| chr15 | 24668239  | 24823757  | 155519 | 2 | 0 | 0 | 0          | 0.01053319 | 2 | 6  | 0.61140001 | 0.91219088 |
| chr15 | 24823757  | 24823816  | 60     | 1 | 0 | 4 | 0          | 0.06713722 | 2 | 6  | 0.61140001 | 0.44141547 |
| chr15 | 24823816  | 24924417  | 106002 | 1 | 0 | 3 | 0          | 0.03070643 | 2 | 6  | 0.61140001 | 0.63695542 |
| chr15 | 24924417  | 24979427  | 55011  | 2 | 0 | 4 | 0          | 0.06713722 | 2 | 6  | 0.61140001 | 0.44141547 |
| chr15 | 24979427  | 25143144  | 163718 | 2 | 0 | 2 | 0          | 0.01053319 | 2 | 6  | 0.61140001 | 0.91219088 |
| chr15 | 25143144  | 25270670  | 127527 | 4 | 0 | 4 | 0          | 0.06713722 | 2 | 6  | 0.61140001 | 0.44141547 |
| chr15 | 25270670  | 25337378  | 66709  | 3 | 0 | 5 | 0          | 0.12309572 | 2 | 6  | 0.61140001 | 0.30102999 |
| chr15 | 25337378  | 25582762  | 245385 | 5 | 0 | 6 | 0          | 0.20064824 | 2 | 6  | 0.61140001 | 0.20064824 |
| chr15 | 25582762  | 25671301  | 88540  | 3 | 0 | 7 | 0          | 0.20469099 | 2 | 7  | 0.61140001 | 0.20469099 |
| chr15 | 25671301  | 25682687  | 11387  | 2 | 0 | 8 | 0          | 0.2074654  | 2 | 8  | 0.61140001 | 0.2074654  |
| chr15 | 25682687  | 25766021  | 83335  | 1 | 0 | 7 | 0          | 0.13499366 | 2 | 8  | 0.61140001 | 0.30102999 |
| chr15 | 25766021  | 25808853  | 42833  | 1 | 0 | 7 | 0          | 0.20469099 | 2 | 7  | 0.61140001 | 0.20469099 |
| chr15 | 25808853  | 25966999  | 158147 | 4 | 0 | 9 | 0          | 0.30102999 | 2 | 6  | 0.61140001 | 0.13872638 |
| chr15 | 25966999  | 25967058  | 60     | 1 | 0 | 9 | 0          | 0.20975986 | 2 | 9  | 0.61140001 | 0.20975986 |
| chr15 | 25967058  | 26059904  | 92847  | 2 | 0 | 9 | 0          | 0.20975986 | 1 | 9  | 0.30102999 | 0.20975986 |
| chr15 | 26059904  | 26059963  | 60     | 1 | 0 | 9 | 0          | 0.14135546 | 1 | 0  | 0.30102999 | 0.30102999 |
| chr15 | 26059963  | 26238136  | 178174 |   |   |   |            |            |   |    |            |            |

|       |          |          |        |    |   |    |   |            |   |    |            |            |
|-------|----------|----------|--------|----|---|----|---|------------|---|----|------------|------------|
| chr15 | 28119374 | 28171418 | 52045  | 1  | 0 | 6  | 0 | 0.04875589 | 0 | 9  | 0          | 0.5732208  |
| chr15 | 28171418 | 28231753 | 60336  | 1  | 0 | 5  | 0 | 0.04407651 | 0 | 8  | 0          | 0.58747015 |
| chr15 | 28231753 | 28305526 | 73774  | 3  | 0 | 6  | 0 | 0.02793176 | 0 | 10 | 0          | 0.74627054 |
| chr15 | 28305526 | 28357515 | 51990  | 2  | 0 | 7  | 0 | 0.03037338 | 0 | 11 | 0          | 0.73110763 |
| chr15 | 28357515 | 28357574 | 60     | 1  | 0 | 8  | 0 | 0.05490675 | 0 | 11 | 0          | 0.55623409 |
| chr15 | 28357574 | 28409933 | 52360  | 1  | 0 | 8  | 0 | 0.08923391 | 0 | 10 | 0          | 0.4167287  |
| chr15 | 28409933 | 28436403 | 26471  | 2  | 0 | 10 | 0 | 0.21118145 | 0 | 10 | 0          | 0.21118145 |
| chr15 | 28436403 | 28491165 | 54763  | 1  | 0 | 7  | 0 | 0.08584816 | 0 | 9  | 0          | 0.42015402 |
| chr15 | 28491165 | 28525401 | 34237  | 2  | 0 | 7  | 0 | 0.08584816 | 1 | 9  | 0.30102999 | 0.42015402 |
| chr15 | 28525401 | 28525460 | 60     | 1  | 0 | 8  | 0 | 0.05490675 | 1 | 11 | 0.30102999 | 0.55623409 |
| chr15 | 28525460 | 29213402 | 687943 | 1  | 0 | 7  | 0 | 0.05232577 | 0 | 10 | 0          | 0.56314362 |
| chr15 | 29213402 | 29253376 | 39975  | 2  | 0 | 9  | 0 | 0.0331093  | 0 | 13 | 0          | 0.71538971 |
| chr15 | 29253376 | 29288002 | 34627  | 1  | 0 | 8  | 0 | 0.05490675 | 0 | 11 | 0          | 0.55623409 |
| chr15 | 29288002 | 29409576 | 121575 | 3  | 0 | 7  | 0 | 0.03037338 | 0 | 11 | 0          | 0.73110763 |
| chr15 | 29409576 | 29520075 | 110500 | 2  | 0 | 5  | 0 | 0.01320236 | 0 | 10 | 0          | 0.97390707 |
| chr15 | 29520075 | 29520134 | 60     | 1  | 0 | 7  | 0 | 0.05232577 | 0 | 10 | 0          | 0.56314362 |
| chr15 | 29520134 | 30026526 | 506393 | 13 | 0 | 6  | 0 | 0.02793176 | 0 | 10 | 0          | 0.74627054 |
| chr15 | 30026526 | 30078327 | 51802  | 2  | 0 | 7  | 0 | 0.05232577 | 0 | 10 | 0          | 0.56314362 |
| chr15 | 30078327 | 30112698 | 34372  | 2  | 0 | 9  | 0 | 0.0565833  | 0 | 12 | 0          | 0.55190077 |
| chr15 | 30112698 | 30207473 | 94776  | 1  | 0 | 8  | 0 | 0.08923391 | 0 | 10 | 0          | 0.4167287  |
| chr15 | 30207473 | 30251859 | 44387  | 1  | 0 | 7  | 0 | 0.05232577 | 0 | 10 | 0          | 0.56314362 |
| chr15 | 30251859 | 30323079 | 70221  | 2  | 0 | 10 | 0 | 0.03037338 | 0 | 11 | 0          | 0.73110763 |
| chr15 | 30323079 | 30322138 | 60     | 1  | 0 | 7  | 0 | 0.01667721 | 0 | 12 | 0          | 0.92522588 |
| chr15 | 30322138 | 31014508 | 692371 | 1  | 0 | 4  | 0 | 0.02074938 | 0 | 8  | 0          | 0.79906872 |
| chr15 | 31014508 | 31042916 | 28409  | 2  | 0 | 5  | 0 | 0.04407651 | 0 | 8  | 0          | 0.58747015 |
| chr15 | 31042916 | 31077774 | 34859  | 2  | 0 | 5  | 0 | 0.02473314 | 0 | 9  | 0          | 0.76806864 |
| chr15 | 31077774 | 31077833 | 60     | 1  | 0 | 6  | 0 | 0.01518174 | 0 | 11 | 0          | 0.9449689  |
| chr15 | 31077833 | 31123245 | 45413  | 1  | 0 | 5  | 0 | 0.04407651 | 0 | 8  | 0          | 0.58747015 |
| chr15 | 31123245 | 31199872 | 76628  | 1  | 0 | 5  | 0 | 0.07511598 | 0 | 7  | 0          | 0.43181735 |
| chr15 | 31199872 | 31203454 | 3583   | 2  | 0 | 6  | 0 | 0.02793176 | 0 | 10 | 0          | 0.74627054 |
| chr15 | 31203454 | 31337451 | 133998 | 4  | 0 | 5  | 0 | 0.07511598 | 0 | 7  | 0          | 0.43181735 |
| chr15 | 31337451 | 31427493 | 90043  | 5  | 0 | 7  | 0 | 0.03037338 | 0 | 11 | 0          | 0.73110763 |
| chr15 | 31427493 | 31516639 | 89147  | 2  | 0 | 8  | 0 | 0.03209037 | 0 | 12 | 0          | 0.72109894 |
| chr15 | 31516639 | 31886373 | 369735 | 10 | 0 | 9  | 0 | 0.0331093  | 0 | 13 | 0          | 0.71538971 |
| chr15 | 31886373 | 31972646 | 86274  | 1  | 0 | 8  | 0 | 0.01767679 | 0 | 13 | 0          | 0.91308053 |
| chr15 | 31972646 | 32021792 | 49147  | 2  | 0 | 10 | 0 | 0.05740087 | 0 | 13 | 0          | 0.5498098  |
| chr15 | 32021792 | 32139817 | 118026 | 2  | 0 | 10 | 0 | 0.09290028 | 0 | 12 | 0          | 0.41314172 |
| chr15 | 32139817 | 32139876 | 60     | 1  | 0 | 11 | 0 | 0.14385241 | 0 | 12 | 0          | 0.30102999 |
| chr15 | 32139876 | 32248451 | 108576 | 1  | 0 | 10 | 0 | 0.09290028 | 0 | 12 | 0          | 0.41314172 |
| chr15 | 32248451 | 32248510 | 60     | 1  | 0 | 10 | 0 | 0.03344703 | 1 | 14 | 0.30102999 | 0.71353304 |
| chr15 | 32248510 | 32350044 | 101535 | 2  | 0 | 10 | 0 | 0.05740087 | 1 | 13 | 0.30102999 | 0.5498098  |
| chr15 | 32350044 | 32404023 | 53980  | 1  | 0 | 10 | 0 | 0.09290028 | 1 | 12 | 0.30102999 | 0.41314172 |
| chr15 | 32404023 | 32438943 | 34921  | 1  | 0 | 9  | 0 | 0.09154957 | 1 | 11 | 0.30102999 | 0.41444892 |
| chr15 | 32438943 | 32510804 | 71862  | 1  | 0 | 9  | 0 | 0.05490675 | 1 | 11 | 0.30102999 | 0.55623409 |
| chr15 | 32510804 | 32510863 | 60     | 1  | 0 | 9  | 0 | 0.0565833  | 1 | 12 | 0.30102999 | 0.55190077 |
| chr15 | 32510863 | 33009483 | 498621 | 4  | 0 | 6  | 0 | 0.02793176 | 1 | 10 | 0.30102999 | 0.74627054 |
| chr15 | 33009483 | 33124227 | 114745 | 3  | 0 | 6  | 0 | 0.02793176 | 0 | 10 | 0          | 0.74627054 |
| chr15 | 33124227 | 33124286 | 60     | 1  | 0 | 6  | 0 | 0.02793176 | 0 | 10 | 0.6114001  | 0.74627054 |
| chr15 | 33124286 | 33233076 | 108791 | 2  | 0 | 6  | 0 | 0.02793176 | 1 | 10 | 0.30102999 | 0.74627054 |
| chr15 | 33233076 | 33393847 | 160772 | 5  | 0 | 7  | 0 | 0.05232577 | 1 | 10 | 0.30102999 | 0.56314362 |
| chr15 | 33393847 | 33660331 | 266485 | 6  | 0 | 7  | 0 | 0.05232577 | 2 | 10 | 0.6114001  | 0.56314362 |
| chr15 | 33660331 | 33660390 | 60     | 1  | 0 | 8  | 0 | 0.05490675 | 2 | 11 | 0.6114001  | 0.55623409 |
| chr15 | 33660390 | 33958877 | 298488 | 6  | 0 | 8  | 0 | 0.08923391 | 2 | 10 | 0.6114001  | 0.4167287  |
| chr15 | 33958877 | 34016348 | 57472  | 1  | 0 | 8  | 0 | 0.13872638 | 2 | 9  | 0.6114001  | 0.30102999 |
| chr15 | 34016348 | 34105933 | 89586  | 2  | 0 | 7  | 0 | 0.08584816 | 1 | 9  | 0.30102999 | 0.42015402 |
| chr15 | 34105933 | 34105992 | 60     | 1  | 0 | 7  | 0 | 0.05232577 | 2 | 10 | 0.6114001  | 0.56314362 |
| chr15 | 34105992 | 34282753 | 176762 | 5  | 0 | 7  | 0 | 0.08584816 | 2 | 9  | 0.6114001  | 0.42015402 |
| chr15 | 34282753 | 34553138 | 270386 | 7  | 0 | 7  | 0 | 0.08584816 | 1 | 9  | 0.30102999 | 0.42015402 |
| chr15 | 34553138 | 34627016 | 73879  | 2  | 0 | 6  | 0 | 0.04875589 | 1 | 9  | 0.30102999 | 0.5732208  |
| chr15 | 34627016 | 34785082 | 158067 | 6  | 0 | 7  | 0 | 0.08584816 | 1 | 9  | 0.30102999 | 0.42015402 |
| chr15 | 34785082 | 35045797 | 260716 | 3  | 0 | 7  | 0 | 0.08584816 | 1 | 9  | 0          | 0.42015402 |
| chr15 | 35045797 | 35228487 | 182691 | 7  | 0 | 8  | 0 | 0.13872638 | 0 | 9  | 0          | 0.30102999 |
| chr15 | 35228487 | 35228546 | 60     | 1  | 0 | 9  | 0 | 0.20975986 | 0 | 9  | 0          | 0.20975986 |
| chr15 | 35228546 | 35271744 | 43199  | 1  | 0 | 6  | 0 | 0.04875589 | 0 | 9  | 0          | 0.5732208  |
| chr15 | 35271744 | 35352721 | 80978  | 1  | 0 | 6  | 0 | 0.08122616 | 0 | 8  | 0          | 0.4250187  |
| chr15 | 35352721 | 35352780 | 60     | 1  | 0 | 6  | 0 | 0.30102999 | 0 | 8  | 0          | 0.30102999 |
| chr15 | 35352780 | 35500586 | 147807 | 1  | 0 | 8  | 0 | 0.20764654 | 0 | 8  | 0          | 0.20764654 |
| chr15 | 35500586 | 35510797 | 10212  | 3  | 0 | 8  | 0 | 0.13872638 | 0 | 9  | 0          | 0.30102999 |
| chr15 | 35510797 | 35601776 | 90980  | 1  | 0 | 7  | 0 | 0.08584816 | 0 | 9  | 0          | 0.42015402 |
| chr15 | 35601776 | 35785223 | 183448 | 4  | 0 | 5  | 0 | 0.02473314 | 0 | 7  | 0          | 0.76806864 |
| chr15 | 35785223 | 35811641 | 26419  | 2  | 0 | 7  | 0 | 0.08584816 | 0 | 9  | 0          | 0.42015402 |
| chr15 | 35811641 | 35811700 | 60     | 1  | 0 | 9  | 0 | 0.20975986 | 0 | 9  | 0          | 0.20975986 |
| chr15 | 35811700 | 35907640 | 95941  | 1  | 0 | 8  | 0 | 0.13872638 | 0 | 9  | 0          | 0.30102999 |
| chr15 | 35907640 | 35987298 | 79659  | 2  | 0 | 8  | 0 | 0.08923391 | 0 | 10 | 0          | 0.4167287  |
| chr15 | 35987298 | 35987357 | 60     | 1  | 0 | 10 | 0 | 0.21118145 | 0 | 10 | 0          | 0.21118145 |
| chr15 | 35987357 | 36049903 | 62547  | 1  | 0 | 8  | 0 | 0.08923391 | 0 | 10 | 0          | 0.4167287  |
| chr15 | 36049903 | 36215115 | 165213 | 2  | 0 | 7  | 0 | 0.08584816 | 0 | 9  | 0          | 0.42015402 |
| chr15 | 36215115 | 36215174 | 60     | 1  | 0 | 8  | 0 | 0.08923391 | 0 | 10 | 0          | 0.4167287  |
| chr15 | 36215174 | 36402021 | 186848 | 2  | 0 | 7  | 0 | 0.08584816 | 0 | 9  | 0          | 0.42015402 |
| chr15 | 36402021 | 36472607 | 70587  | 2  | 0 | 10 | 0 | 0.30102999 | 0 | 9  | 0          | 0.14135546 |
| chr15 | 36472607 | 36665445 | 192839 | 1  | 0 | 8  | 0 | 0.13872638 | 0 | 9  | 0          | 0.30102999 |
| chr15 | 36665445 | 36665504 | 60     | 1  | 0 | 9  | 0 | 0.20975986 | 0 | 9  | 0          | 0.20975986 |
| chr15 | 36665504 | 36761873 | 96370  | 1  | 0 | 7  | 0 | 0.08584816 | 0 | 9  | 0          | 0.42015402 |
| chr15 | 36761873 | 36761932 | 60     | 1  | 0 | 8  | 0 | 0.08923391 | 0 | 10 | 0          | 0.4167287  |
| chr15 | 36761932 | 36841785 | 79854  | 1  | 0 | 5  | 0 | 0.02473314 | 0 | 9  | 0          | 0.76806864 |
| chr15 | 36841785 | 36932795 | 91011  | 2  | 0 | 4  | 0 | 0.01077081 | 0 | 9  | 0          | 1.01542894 |
| chr15 | 36932795 | 36932854 | 60     | 1  | 0 | 5  | 0 | 0.01320236 | 0 | 10 | 0          | 0.97390707 |
| chr15 | 36932854 | 37100788 | 167935 | 3  | 0 | 2  | 0 | 0.00493743 | 0 | 7  | 0          | 1.16581773 |
| chr15 | 37100788 | 37100847 | 60     | 1  | 0 | 3  | 0 | 0.01598258 | 0 | 7  | 0          | 0.84395715 |
| chr15 | 37100847 | 37225880 | 125034 | 3  | 0 | 2  | 0 | 0.01053319 | 0 | 6  | 0          | 0.91219088 |
| chr15 | 37225880 | 37269953 | 44074  | 2  | 0 | 6  | 0 | 0.03070643 | 0 | 6  | 0          | 0.63695542 |
| chr15 | 37269953 | 37307586 | 37634  | 2  | 0 | 7  | 0 | 0.13499366 | 0 | 8  | 0          | 0.30102999 |
| chr15 | 37307586 | 37385405 | 77820  | 2  | 0 | 2  | 0 | 0.0429175  | 0 | 4  | 0          | 0.47744371 |
| chr15 | 37385405 | 37392418 | 7014   | 2  | 0 | 7  | 0 | 0.13499366 | 0 | 8  | 0          | 0.30102999 |
| chr15 | 37392418 | 37665129 | 272712 | 2  | 0 | 2  | 0 | 0.0429175  | 0 | 4  | 0          | 0.47744371 |
| chr15 | 37665129 | 37665188 | 60     | 1  | 0 | 7  | 0 | 0.20469099 | 0 | 7  | 0          | 0.20469099 |
| chr15 | 37665188 | 37869400 | 204213 | 2  | 0 | 6  | 0 | 0.30102999 | 0 | 6  | 0          | 0.129913   |
| chr15 | 37869400 | 37869459 | 60     | 1  | 0 | 7  | 0 | 0.13499366 | 0 | 8  | 0          | 0.30102999 |
| chr15 | 37869459 | 37963965 | 94507  | 1  | 0 | 5  | 0 | 0.07511598 | 0 | 7  | 0          | 0.43181735 |
| chr15 | 37963965 | 38067159 | 103195 | 1  | 0 | 4  | 0 | 0.06713722 | 0 | 6  | 0          | 0.44141547 |
| chr15 | 38067159 | 38067218 | 60     | 1  |   |    |   |            |   |    |            |            |



|       |          |          |        |    |   |    |   |            |   |    |   |            |
|-------|----------|----------|--------|----|---|----|---|------------|---|----|---|------------|
| chr15 | 39979988 | 40018775 | 38788  | 2  | 0 | 10 | 0 | 0.0574087  | 0 | 13 | 0 | 0.5498098  |
| chr15 | 40018775 | 40093168 | 74394  | 2  | 0 | 13 | 0 | 0.2120026  | 0 | 13 | 0 | 0.2120026  |
| chr15 | 40093168 | 40093227 | 60     | 1  | 0 | 13 | 0 | 0.1430347  | 0 | 14 | 0 | 0.3010299  |
| chr15 | 40093227 | 40154123 | 60897  | 1  | 0 | 10 | 0 | 0.0334470  | 0 | 14 | 0 | 0.7135304  |
| chr15 | 40154123 | 40208322 | 54200  | 1  | 0 | 9  | 0 | 0.0181769  | 0 | 14 | 0 | 0.9071947  |
| chr15 | 40208322 | 40385707 | 17386  | 5  | 0 | 10 | 0 | 0.0334470  | 0 | 14 | 0 | 0.7135304  |
| chr15 | 40385707 | 40543747 | 158041 | 3  | 0 | 9  | 0 | 0.0181769  | 0 | 14 | 0 | 0.9071947  |
| chr15 | 40543747 | 40580096 | 36350  | 1  | 0 | 9  | 0 | 0.0331093  | 0 | 13 | 0 | 0.7153897  |
| chr15 | 40580096 | 40597178 | 17083  | 2  | 0 | 9  | 0 | 0.0181769  | 0 | 14 | 0 | 0.9071947  |
| chr15 | 40597178 | 40678692 | 81515  | 2  | 0 | 8  | 0 | 0.0176767  | 0 | 13 | 0 | 0.91308053 |
| chr15 | 40678692 | 40684302 | 5611   | 2  | 0 | 9  | 0 | 0.0331093  | 0 | 13 | 0 | 0.7153897  |
| chr15 | 40684302 | 40701189 | 16888  | 1  | 0 | 9  | 0 | 0.0565833  | 0 | 12 | 0 | 0.55190077 |
| chr15 | 40701189 | 40709032 | 7844   | 2  | 0 | 9  | 0 | 0.0331093  | 0 | 13 | 0 | 0.7153897  |
| chr15 | 40709032 | 40765020 | 55989  | 1  | 0 | 9  | 0 | 0.0565833  | 0 | 12 | 0 | 0.55190077 |
| chr15 | 40765020 | 40824095 | 59076  | 2  | 0 | 9  | 0 | 0.0331093  | 0 | 13 | 0 | 0.7153897  |
| chr15 | 40824095 | 40827964 | 3870   | 1  | 0 | 9  | 0 | 0.0181769  | 0 | 14 | 0 | 0.9071947  |
| chr15 | 40827964 | 40856730 | 28767  | 2  | 0 | 9  | 0 | 0.0331093  | 0 | 13 | 0 | 0.7153897  |
| chr15 | 40856730 | 40866601 | 9872   | 2  | 0 | 10 | 0 | 0.0574087  | 0 | 13 | 0 | 0.5498098  |
| chr15 | 40866601 | 40866660 | 60     | 1  | 0 | 10 | 0 | 0.0334470  | 0 | 14 | 0 | 0.7135304  |
| chr15 | 40866660 | 40941446 | 74787  | 2  | 0 | 10 | 0 | 0.09290028 | 0 | 12 | 0 | 0.41314172 |
| chr15 | 40941446 | 41149572 | 208127 | 10 | 0 | 10 | 0 | 0.0574087  | 0 | 13 | 0 | 0.5498098  |
| chr15 | 41149572 | 41149631 | 60     | 1  | 0 | 11 | 0 | 0.0331093  | 0 | 15 | 0 | 0.7153897  |
| chr15 | 41149631 | 41191149 | 41519  | 2  | 0 | 10 | 0 | 0.0334470  | 0 | 14 | 0 | 0.7135304  |
| chr15 | 41191149 | 41342253 | 151105 | 5  | 0 | 10 | 0 | 0.0181769  | 0 | 15 | 0 | 0.9071947  |
| chr15 | 41342253 | 41396490 | 54238  | 2  | 0 | 9  | 0 | 0.0181769  | 0 | 14 | 0 | 0.9071947  |
| chr15 | 41396490 | 41396549 | 60     | 1  | 0 | 10 | 0 | 0.0181769  | 0 | 15 | 0 | 0.9071947  |
| chr15 | 41396549 | 41746409 | 79861  | 1  | 0 | 10 | 0 | 0.0334470  | 0 | 14 | 0 | 0.7135304  |
| chr15 | 41746409 | 41552430 | 76022  | 2  | 0 | 9  | 0 | 0.0181769  | 0 | 14 | 0 | 0.9071947  |
| chr15 | 41552430 | 41574329 | 21900  | 2  | 0 | 10 | 0 | 0.0334470  | 0 | 14 | 0 | 0.7135304  |
| chr15 | 41574329 | 41574388 | 60     | 1  | 0 | 10 | 0 | 0.0181769  | 0 | 15 | 0 | 0.9071947  |
| chr15 | 41574388 | 41625749 | 51362  | 2  | 0 | 9  | 0 | 0.0181769  | 0 | 14 | 0 | 0.9071947  |
| chr15 | 41625749 | 41693095 | 67347  | 4  | 0 | 11 | 0 | 0.0574087  | 0 | 14 | 0 | 0.5498098  |
| chr15 | 41693095 | 41858071 | 164977 | 4  | 0 | 12 | 0 | 0.09290028 | 0 | 14 | 0 | 0.41314172 |
| chr15 | 41858071 | 41961373 | 103303 | 5  | 0 | 10 | 0 | 0.0565833  | 0 | 15 | 0 | 0.55190077 |
| chr15 | 41961373 | 42457886 | 496514 | 17 | 0 | 12 | 0 | 0.09290028 | 0 | 14 | 0 | 0.41314172 |
| chr15 | 42457886 | 42502519 | 44634  | 3  | 0 | 13 | 0 | 0.09154957 | 0 | 15 | 0 | 0.41444892 |
| chr15 | 42502519 | 4251911  | 29939  | 2  | 0 | 14 | 0 | 0.14135546 | 0 | 15 | 0 | 0.3010299  |
| chr15 | 4251911  | 42720686 | 188776 | 5  | 0 | 13 | 0 | 0.09154957 | 0 | 15 | 0 | 0.41444892 |
| chr15 | 42720686 | 42814396 | 93711  | 3  | 0 | 15 | 0 | 0.20975986 | 0 | 0  | 0 | 0.20975986 |
| chr15 | 42814396 | 42845023 | 30628  | 3  | 0 | 14 | 0 | 0.14135546 | 0 | 15 | 0 | 0.3010299  |
| chr15 | 42845023 | 42980676 | 136564 | 2  | 0 | 13 | 0 | 0.09154957 | 0 | 15 | 0 | 0.41444892 |
| chr15 | 42980676 | 43021196 | 40521  | 1  | 0 | 13 | 0 | 0.1430347  | 0 | 14 | 0 | 0.3010299  |
| chr15 | 43021196 | 43036663 | 15468  | 2  | 0 | 14 | 0 | 0.21118145 | 0 | 14 | 0 | 0.21118145 |
| chr15 | 43036663 | 43087385 | 50723  | 1  | 0 | 13 | 0 | 0.1430347  | 0 | 14 | 0 | 0.3010299  |
| chr15 | 43087385 | 43087444 | 60     | 1  | 0 | 13 | 0 | 0.09154957 | 0 | 15 | 0 | 0.41444892 |
| chr15 | 43087444 | 43144229 | 56786  | 1  | 0 | 11 | 0 | 0.0574087  | 0 | 14 | 0 | 0.5498098  |
| chr15 | 43144229 | 43206743 | 62515  | 1  | 0 | 10 | 0 | 0.0574087  | 0 | 13 | 0 | 0.5498098  |
| chr15 | 43206743 | 43452932 | 246190 | 6  | 0 | 9  | 0 | 0.0331093  | 0 | 13 | 0 | 0.7153897  |
| chr15 | 43452932 | 43487174 | 34243  | 2  | 0 | 9  | 0 | 0.09154957 | 0 | 11 | 0 | 0.41444892 |
| chr15 | 43487174 | 43507570 | 20397  | 2  | 0 | 9  | 0 | 0.14135546 | 0 | 10 | 0 | 0.3010299  |
| chr15 | 43507570 | 43552103 | 44534  | 2  | 0 | 9  | 0 | 0.09154957 | 0 | 11 | 0 | 0.41444892 |
| chr15 | 43552103 | 43619942 | 67840  | 3  | 0 | 9  | 0 | 0.14135546 | 0 | 10 | 0 | 0.3010299  |
| chr15 | 43619942 | 43664702 | 44761  | 3  | 0 | 9  | 0 | 0.09154957 | 0 | 11 | 0 | 0.41444892 |
| chr15 | 43664702 | 43699533 | 34832  | 1  | 0 | 9  | 0 | 0.14135546 | 0 | 10 | 0 | 0.3010299  |
| chr15 | 43699533 | 43720184 | 20652  | 1  | 0 | 9  | 0 | 0.3010299  | 0 | 8  | 0 | 0.13872638 |
| chr15 | 43720184 | 43720243 | 60     | 1  | 0 | 9  | 0 | 0.20975986 | 0 | 9  | 0 | 0.20975986 |
| chr15 | 43720243 | 43749322 | 29080  | 1  | 0 | 9  | 0 | 0.3010299  | 0 | 8  | 0 | 0.13872638 |
| chr15 | 43749322 | 43784185 | 34864  | 2  | 0 | 9  | 0 | 0.20975986 | 0 | 9  | 0 | 0.20975986 |
| chr15 | 43784185 | 43784244 | 60     | 1  | 0 | 9  | 0 | 0.14135546 | 0 | 10 | 0 | 0.3010299  |
| chr15 | 43784244 | 43850223 | 65980  | 3  | 0 | 9  | 0 | 0.20975986 | 0 | 9  | 0 | 0.20975986 |
| chr15 | 43850223 | 43888927 | 38705  | 1  | 0 | 9  | 0 | 0.13872638 | 0 | 9  | 0 | 0.3010299  |
| chr15 | 43888927 | 44016490 | 127564 | 3  | 0 | 8  | 0 | 0.08923391 | 0 | 10 | 0 | 0.4167287  |
| chr15 | 44016490 | 44016549 | 60     | 1  | 0 | 8  | 0 | 0.05490675 | 0 | 11 | 0 | 0.55623409 |
| chr15 | 44016549 | 44065111 | 48563  | 2  | 0 | 8  | 0 | 0.08923391 | 0 | 10 | 0 | 0.4167287  |
| chr15 | 44065111 | 44149257 | 84147  | 5  | 0 | 8  | 0 | 0.05490675 | 0 | 11 | 0 | 0.55623409 |
| chr15 | 44149257 | 44214776 | 65520  | 3  | 0 | 9  | 0 | 0.0331093  | 0 | 11 | 0 | 0.7153897  |
| chr15 | 44214776 | 44214835 | 60     | 1  | 0 | 9  | 0 | 0.0181769  | 0 | 14 | 0 | 0.9071947  |
| chr15 | 44214835 | 44245758 | 30924  | 1  | 0 | 7  | 0 | 0.00859886 | 0 | 13 | 0 | 1.14735594 |
| chr15 | 44245758 | 44275073 | 29316  | 1  | 0 | 7  | 0 | 0.01667721 | 0 | 12 | 0 | 0.92532268 |
| chr15 | 44275073 | 44358868 | 83796  | 3  | 0 | 9  | 0 | 0.0565833  | 0 | 12 | 0 | 0.55190077 |
| chr15 | 44358868 | 44410056 | 51189  | 1  | 0 | 8  | 0 | 0.03209037 | 0 | 12 | 0 | 0.7219894  |
| chr15 | 44410056 | 44410115 | 60     | 1  | 0 | 8  | 0 | 0.0176767  | 0 | 13 | 0 | 0.91308053 |
| chr15 | 44410115 | 44450889 | 40775  | 1  | 0 | 8  | 0 | 0.03209037 | 0 | 12 | 0 | 0.7219894  |
| chr15 | 44450889 | 44450948 | 60     | 1  | 0 | 9  | 0 | 0.0565833  | 0 | 12 | 0 | 0.55190077 |
| chr15 | 44450948 | 44538622 | 87675  | 2  | 0 | 8  | 0 | 0.03209037 | 0 | 12 | 0 | 0.7219894  |
| chr15 | 44538622 | 44589103 | 50482  | 1  | 0 | 8  | 0 | 0.13872638 | 0 | 9  | 0 | 0.3010299  |
| chr15 | 44589103 | 44669229 | 80127  | 2  | 0 | 7  | 0 | 0.08584816 | 0 | 9  | 0 | 0.42015402 |
| chr15 | 44669229 | 44707942 | 38714  | 2  | 0 | 7  | 0 | 0.05232577 | 0 | 10 | 0 | 0.56314362 |
| chr15 | 44707942 | 44763220 | 55279  | 2  | 0 | 7  | 0 | 0.01667721 | 0 | 12 | 0 | 0.92532268 |
| chr15 | 44763220 | 44854621 | 91402  | 2  | 0 | 7  | 0 | 0.03037338 | 0 | 11 | 0 | 0.73110763 |
| chr15 | 44854621 | 44918673 | 64053  | 5  | 0 | 8  | 0 | 0.05490675 | 0 | 11 | 0 | 0.55623409 |
| chr15 | 44918673 | 45009783 | 91111  | 5  | 0 | 9  | 0 | 0.09154957 | 0 | 11 | 0 | 0.41444892 |
| chr15 | 45009783 | 45047376 | 37594  | 1  | 0 | 8  | 0 | 0.05490675 | 0 | 11 | 0 | 0.55623409 |
| chr15 | 45047376 | 45319178 | 271803 | 7  | 0 | 9  | 0 | 0.0565833  | 0 | 12 | 0 | 0.55190077 |
| chr15 | 45319178 | 45319237 | 60     | 1  | 0 | 10 | 0 | 0.09290028 | 0 | 12 | 0 | 0.41314172 |
| chr15 | 45319237 | 45385844 | 66608  | 1  | 0 | 9  | 0 | 0.0565833  | 0 | 12 | 0 | 0.55190077 |
| chr15 | 45385844 | 45419014 | 33171  | 3  | 0 | 9  | 0 | 0.0331093  | 0 | 13 | 0 | 0.7153897  |
| chr15 | 45419014 | 45495612 | 76599  | 2  | 0 | 9  | 0 | 0.0565833  | 0 | 12 | 0 | 0.55190077 |
| chr15 | 45495612 | 45633814 | 138203 | 4  | 0 | 10 | 0 | 0.09290028 | 0 | 12 | 0 | 0.41314172 |
| chr15 | 45633814 | 45671099 | 37286  | 2  | 0 | 9  | 0 | 0.0565833  | 0 | 12 | 0 | 0.55190077 |
| chr15 | 45671099 | 45700159 | 29061  | 3  | 0 | 10 | 0 | 0.0334470  | 0 | 14 | 0 | 0.7135304  |
| chr15 | 45700159 | 45803328 | 103170 | 4  | 0 | 9  | 0 | 0.0565833  | 0 | 12 | 0 | 0.55190077 |
| chr15 | 45803328 | 45803477 | 150    | 2  | 0 | 10 | 0 | 0.09290028 | 0 | 12 | 0 | 0.41314172 |
| chr15 | 45803477 | 45860115 | 56639  | 1  | 0 | 9  | 0 | 0.0565833  | 0 | 12 | 0 | 0.55190077 |
| chr15 | 45860115 | 45860174 | 60     | 1  | 0 | 9  | 0 | 0.0331093  | 0 | 13 | 0 | 0.7153897  |
| chr15 | 45860174 | 45947586 | 87413  | 3  | 0 | 8  | 0 | 0.0176767  | 0 | 13 | 0 | 0.91308053 |
| chr15 | 45947586 | 46026444 | 78859  | 1  | 0 | 7  | 0 | 0.03037338 | 0 | 11 | 0 | 0.73110763 |
| chr15 | 46026444 | 46176831 | 150388 | 1  | 0 | 7  | 0 | 0.20469099 | 0 | 7  | 0 | 0.20469099 |
| chr15 | 46176831 | 46602812 | 425982 | 4  | 0 | 6  | 0 | 0.129913   | 0 | 7  | 0 | 0.3010299  |
| chr15 | 46602812 | 46602871 | 60     | 1  | 0 | 7  | 0 | 0.13499366 | 0 | 8  | 0 | 0.3010299  |
| chr15 | 46602871 | 46749033 | 146163 | 1  | 0 | 4  | 0 | 0.03812622 | 0 | 7  | 0 | 0.60763643 |
| chr15 | 46749033 | 46749092 | 60     | 1  | 0 | 4  | 0 | 0.02074938 | 0 | 8  | 0 | 0.79906872 |
| chr15 | 46749092 | 46       |        |    |   |    |   |            |   |    |   |            |

|       |          |          |        |   |   |    |           |            |    |    |            |            |
|-------|----------|----------|--------|---|---|----|-----------|------------|----|----|------------|------------|
| chr15 | 48969211 | 48969270 | 60     | 1 | 1 | 8  | 0.1218695 | 0.08923391 | 1  | 10 | 0.1218695  | 0.4167287  |
| chr15 | 48969270 | 49033702 | 64433  | 1 | 1 | 8  | 0.1218695 | 0.13872638 | 1  | 9  | 0.1218695  | 0.30102999 |
| chr15 | 49033702 | 49084632 | 50931  | 1 | 1 | 7  | 0.1218695 | 0.13499366 | 8  | 9  | 0.1218695  | 0.30102999 |
| chr15 | 49084632 | 49118738 | 34107  | 2 | 1 | 7  | 0.1218695 | 0.08584816 | 1  | 9  | 0.1218695  | 0.42015402 |
| chr15 | 49118738 | 49210236 | 91499  | 3 | 1 | 8  | 0.1218695 | 0.13872638 | 1  | 9  | 0.1218695  | 0.30102999 |
| chr15 | 49210236 | 49259968 | 49733  | 2 | 1 | 9  | 0.1218695 | 0.20975986 | 1  | 9  | 0.1218695  | 0.20975986 |
| chr15 | 49259968 | 49290106 | 30139  | 1 | 1 | 8  | 0.1218695 | 0.13872638 | 1  | 9  | 0.1218695  | 0.30102999 |
| chr15 | 49290106 | 49319489 | 29384  | 2 | 1 | 9  | 0.1218695 | 0.14135546 | 1  | 10 | 0.1218695  | 0.30102999 |
| chr15 | 49319489 | 49319548 | 60     | 1 | 1 | 9  | 0.1218695 | 0.09154957 | 11 | 11 | 0.1218695  | 0.41444892 |
| chr15 | 49319548 | 49431696 | 112149 | 2 | 1 | 9  | 0.1218695 | 0.20975986 | 1  | 9  | 0.1218695  | 0.20975986 |
| chr15 | 49431696 | 49471304 | 39609  | 2 | 1 | 10 | 0.1218695 | 0.14303407 | 1  | 11 | 0.1218695  | 0.30102999 |
| chr15 | 49471304 | 49676358 | 205055 | 5 | 1 | 11 | 0.1218695 | 0.14385241 | 1  | 12 | 0.1218695  | 0.30102999 |
| chr15 | 49676358 | 49716454 | 40097  | 2 | 1 | 11 | 0.1218695 | 0.09334429 | 1  | 13 | 0.1218695  | 0.41271556 |
| chr15 | 49716454 | 49800473 | 84020  | 2 | 1 | 10 | 0.1218695 | 0.05740087 | 1  | 13 | 0.1218695  | 0.5498098  |
| chr15 | 49800473 | 49834496 | 34024  | 1 | 1 | 9  | 0.1218695 | 0.03310993 | 1  | 13 | 0.1218695  | 0.71538971 |
| chr15 | 49834496 | 49868297 | 33802  | 1 | 1 | 8  | 0.1218695 | 0.01767679 | 1  | 13 | 0.1218695  | 0.91308053 |
| chr15 | 49868297 | 49915859 | 47563  | 1 | 1 | 9  | 0.1218695 | 0.03209037 | 1  | 12 | 0.1218695  | 0.72109894 |
| chr15 | 49915859 | 49951843 | 35985  | 3 | 1 | 9  | 0.1218695 | 0.0565833  | 1  | 12 | 0.1218695  | 0.55190077 |
| chr15 | 49951843 | 49951902 | 60     | 1 | 1 | 9  | 0.1218695 | 0.03310993 | 1  | 13 | 0.1218695  | 0.71538971 |
| chr15 | 49951902 | 50086210 | 134309 | 2 | 1 | 11 | 0.1218695 | 0.09154957 | 1  | 11 | 0.1218695  | 0.41444892 |
| chr15 | 50086210 | 50168646 | 82437  | 1 | 1 | 8  | 0.1218695 | 0.05490675 | 1  | 11 | 0.1218695  | 0.55623409 |
| chr15 | 50168646 | 50211038 | 42330  | 1 | 1 | 7  | 0.1218695 | 0.03037338 | 1  | 11 | 0.1218695  | 0.73110763 |
| chr15 | 50211038 | 50273167 | 61219  | 2 | 1 | 7  | 0.1218695 | 0.01667721 | 1  | 12 | 0.1218695  | 0.92532268 |
| chr15 | 50273167 | 50273226 | 60     | 1 | 1 | 8  | 0.1218695 | 0.03209037 | 1  | 12 | 0.1218695  | 0.72109894 |
| chr15 | 50273226 | 50311064 | 37839  | 1 | 1 | 7  | 0.1218695 | 0.03037338 | 1  | 11 | 0.1218695  | 0.73110763 |
| chr15 | 50311064 | 50366355 | 55292  | 1 | 1 | 9  | 0.1218695 | 0.09154957 | 1  | 11 | 0.1218695  | 0.41444892 |
| chr15 | 50366355 | 50419669 | 53315  | 1 | 1 | 9  | 0.1218695 | 0.14135546 | 1  | 10 | 0.1218695  | 0.30102999 |
| chr15 | 50419669 | 50468990 | 49312  | 1 | 1 | 9  | 0.1218695 | 0.09154957 | 1  | 11 | 0.1218695  | 0.41444892 |
| chr15 | 50468990 | 50534249 | 65270  | 2 | 1 | 8  | 0.1218695 | 0.08923391 | 1  | 10 | 0.1218695  | 0.4167287  |
| chr15 | 50534249 | 50534301 | 53     | 1 | 1 | 9  | 0.1218695 | 0.0565833  | 1  | 12 | 0.1218695  | 0.55190077 |
| chr15 | 50534301 | 50596430 | 62130  | 2 | 1 | 8  | 0.1218695 | 0.05490675 | 1  | 11 | 0.1218695  | 0.55623409 |
| chr15 | 50596430 | 50630542 | 34113  | 2 | 1 | 9  | 0.1218695 | 0.0565833  | 1  | 12 | 0.1218695  | 0.55190077 |
| chr15 | 50630542 | 50646117 | 15576  | 2 | 1 | 10 | 0.1218695 | 0.05740087 | 1  | 13 | 0.1218695  | 0.5498098  |
| chr15 | 50646117 | 50716230 | 70114  | 1 | 1 | 10 | 0.1218695 | 0.09290028 | 1  | 12 | 0.1218695  | 0.41314172 |
| chr15 | 50716230 | 50744760 | 28531  | 2 | 1 | 10 | 0.1218695 | 0.05740087 | 1  | 13 | 0.1218695  | 0.5498098  |
| chr15 | 50744760 | 50837334 | 92575  | 2 | 1 | 9  | 0.1218695 | 0.0565833  | 1  | 12 | 0.1218695  | 0.55190077 |
| chr15 | 50837334 | 50864843 | 27510  | 2 | 1 | 10 | 0.1218695 | 0.05740087 | 1  | 13 | 0.1218695  | 0.5498098  |
| chr15 | 50864843 | 50896306 | 31464  | 2 | 1 | 11 | 0.1218695 | 0.09334429 | 1  | 13 | 0.1218695  | 0.41271556 |
| chr15 | 50896306 | 50950041 | 53736  | 1 | 1 | 6  | 0.1218695 | 0.00373523 | 1  | 13 | 0.1218695  | 1.42397267 |
| chr15 | 50950041 | 51028268 | 78228  | 1 | 1 | 5  | 0.1218695 | 0.00141024 | 1  | 13 | 0.1218695  | 1.7506523  |
| chr15 | 51028268 | 51155951 | 127684 | 2 | 1 | 6  | 0.1218695 | 0.00373523 | 1  | 13 | 0.1218695  | 1.42397267 |
| chr15 | 51155951 | 51156010 | 60     | 1 | 1 | 8  | 0.1218695 | 0.01767679 | 1  | 13 | 0.1218695  | 0.91308053 |
| chr15 | 51156010 | 51242317 | 86308  | 2 | 1 | 6  | 0.1218695 | 0.00778066 | 1  | 12 | 0.1218695  | 1.17038931 |
| chr15 | 51242317 | 51298206 | 55890  | 2 | 1 | 6  | 0.1218695 | 0.01518174 | 1  | 11 | 0.1218695  | 0.9449689  |
| chr15 | 51298206 | 51481794 | 183589 | 4 | 1 | 6  | 0.1218695 | 0.00778066 | 1  | 12 | 0.1218695  | 1.17038931 |
| chr15 | 51481794 | 51532849 | 51056  | 2 | 1 | 12 | 0.1218695 | 0.01667721 | 1  | 12 | 0.1218695  | 0.92532268 |
| chr15 | 51532849 | 51532908 | 60     | 1 | 1 | 8  | 0.1218695 | 0.01767679 | 1  | 13 | 0.1218695  | 0.91308053 |
| chr15 | 51532908 | 51587451 | 54544  | 1 | 1 | 6  | 0.1218695 | 0.00778066 | 1  | 12 | 0.1218695  | 1.17038931 |
| chr15 | 51587451 | 51627877 | 40427  | 1 | 1 | 6  | 0.1218695 | 0.01518174 | 1  | 11 | 0.1218695  | 0.9449689  |
| chr15 | 51627877 | 51663514 | 35638  | 2 | 1 | 7  | 0.1218695 | 0.03037338 | 1  | 11 | 0.1218695  | 0.73110763 |
| chr15 | 51663514 | 51700094 | 36581  | 2 | 1 | 8  | 0.1218695 | 0.05490675 | 1  | 11 | 0.1218695  | 0.55623409 |
| chr15 | 51700094 | 51700153 | 60     | 1 | 1 | 8  | 0.1218695 | 0.03209037 | 1  | 12 | 0.1218695  | 0.72109894 |
| chr15 | 51700153 | 51773393 | 73241  | 2 | 1 | 7  | 0.1218695 | 0.03037338 | 1  | 11 | 0.1218695  | 0.73110763 |
| chr15 | 51773393 | 51773452 | 60     | 1 | 1 | 9  | 0.1218695 | 0.0565833  | 1  | 12 | 0.1218695  | 0.55190077 |
| chr15 | 51773452 | 51839503 | 66052  | 2 | 1 | 7  | 0.1218695 | 0.01667721 | 1  | 12 | 0.1218695  | 0.92532268 |
| chr15 | 51839503 | 51839562 | 60     | 1 | 1 | 9  | 0.1218695 | 0.0565833  | 1  | 12 | 0.1218695  | 0.55190077 |
| chr15 | 51839562 | 51914051 | 74490  | 2 | 1 | 9  | 0.1218695 | 0.09154957 | 1  | 11 | 0.1218695  | 0.41444892 |
| chr15 | 51914051 | 51914110 | 60     | 1 | 1 | 9  | 0.1218695 | 0.0565833  | 1  | 12 | 0.1218695  | 0.55190077 |
| chr15 | 51914110 | 52129112 | 215003 | 6 | 1 | 9  | 0.1218695 | 0.09154957 | 1  | 11 | 0.1218695  | 0.41444892 |
| chr15 | 52129112 | 52129171 | 60     | 1 | 1 | 11 | 0.1218695 | 0.14385241 | 1  | 12 | 0.1218695  | 0.30102999 |
| chr15 | 52129171 | 52263492 | 134322 | 3 | 1 | 9  | 0.1218695 | 0.0565833  | 1  | 12 | 0.1218695  | 0.55190077 |
| chr15 | 52263492 | 52263543 | 52     | 1 | 1 | 10 | 0.1218695 | 0.09290028 | 1  | 12 | 0.1218695  | 0.41314172 |
| chr15 | 52263543 | 52298931 | 35389  | 1 | 1 | 9  | 0.1218695 | 0.0565833  | 1  | 12 | 0.1218695  | 0.55190077 |
| chr15 | 52298931 | 52375680 | 76750  | 3 | 1 | 10 | 0.1218695 | 0.09290028 | 1  | 12 | 0.1218695  | 0.41314172 |
| chr15 | 52375680 | 52404129 | 28450  | 1 | 1 | 11 | 0.1218695 | 0.14385241 | 1  | 12 | 0.1218695  | 0.30102999 |
| chr15 | 52404129 | 52652669 | 258441 | 9 | 1 | 10 | 0.1218695 | 0.09290028 | 1  | 12 | 0.1218695  | 0.41314172 |
| chr15 | 52652669 | 52801538 | 138960 | 3 | 1 | 9  | 0.1218695 | 0.0565833  | 1  | 12 | 0.1218695  | 0.55190077 |
| chr15 | 52801538 | 53022761 | 221234 | 7 | 1 | 9  | 0.1218695 | 0.09154957 | 1  | 11 | 0.1218695  | 0.41444892 |
| chr15 | 53022761 | 53022820 | 60     | 1 | 1 | 10 | 0.1218695 | 0.14303407 | 1  | 11 | 0.1218695  | 0.30102999 |
| chr15 | 53022820 | 53207302 | 184483 | 3 | 0 | 10 | 0         | 0.21118145 | 1  | 10 | 0.30102999 | 0.21118145 |
| chr15 | 53207302 | 53259359 | 52058  | 4 | 0 | 12 | 0         | 0.21227046 | 1  | 12 | 0.30102999 | 0.21227046 |
| chr15 | 53259359 | 53503987 | 244629 | 1 | 0 | 8  | 0         | 0.08923391 | 1  | 10 | 0.30102999 | 0.4167287  |
| chr15 | 53503987 | 53611526 | 107540 | 2 | 0 | 8  | 0         | 0.05490675 | 1  | 11 | 0.30102999 | 0.55623409 |
| chr15 | 53611526 | 53611585 | 60     | 1 | 0 | 9  | 0         | 0.0565833  | 1  | 12 | 0.30102999 | 0.55190077 |
| chr15 | 53611585 | 53827903 | 216319 | 3 | 0 | 8  | 0         | 0.03209037 | 1  | 12 | 0.30102999 | 0.72109894 |
| chr15 | 53827903 | 53827962 | 60     | 1 | 0 | 9  | 0         | 0.01817691 | 1  | 14 | 0.30102999 | 0.90719478 |
| chr15 | 53827962 | 53908354 | 80393  | 2 | 0 | 7  | 0         | 0.05232577 | 1  | 10 | 0.30102999 | 0.56314362 |
| chr15 | 53908354 | 53908413 | 60     | 1 | 0 | 7  | 0         | 0.03037338 | 1  | 11 | 0.30102999 | 0.73110763 |
| chr15 | 53908413 | 53957898 | 49486  | 1 | 0 | 6  | 0         | 0.01518174 | 1  | 11 | 0.30102999 | 0.9449689  |
| chr15 | 53957898 | 54003112 | 45215  | 2 | 0 | 6  | 0         | 0.00778066 | 1  | 12 | 0.30102999 | 1.17038931 |
| chr15 | 54003112 | 54050047 | 46936  | 1 | 0 | 6  | 0         | 0.01518174 | 1  | 11 | 0.30102999 | 0.9449689  |
| chr15 | 54050047 | 54050106 | 60     | 1 | 0 | 7  | 0         | 0.03037338 | 1  | 11 | 0.30102999 | 0.73110763 |
| chr15 | 54050106 | 54157265 | 107160 | 1 | 0 | 6  | 0         | 0.01518174 | 1  | 11 | 0.30102999 | 0.9449689  |
| chr15 | 54157265 | 54451481 | 294217 | 5 | 0 | 6  | 0         | 0.04875589 | 0  | 0  | 0          | 0.5732208  |
| chr15 | 54451481 | 54510127 | 58647  | 1 | 0 | 6  | 0         | 0.08122616 | 0  | 8  | 0          | 0.4250187  |
| chr15 | 54510127 | 54556488 | 46362  | 2 | 0 | 6  | 0         | 0.04875589 | 0  | 9  | 0          | 0.5732208  |
| chr15 | 54556488 | 54557589 | 1102   | 3 | 0 | 6  | 0         | 0.02793176 | 1  | 10 | 0.30102999 | 0.74627054 |
| chr15 | 54557589 | 54671727 | 114139 | 3 | 0 | 4  | 0         | 0.00530919 | 1  | 10 | 0.30102999 | 1.2568129  |
| chr15 | 54671727 | 54713558 | 41832  | 2 | 0 | 5  | 0         | 0.00666883 | 1  | 11 | 0.30102999 | 1.20557689 |
| chr15 | 54713558 | 54713617 | 60     | 1 | 0 | 8  | 0         | 0.03209037 | 1  | 12 | 0.30102999 | 0.72109894 |
| chr15 | 54713617 | 54757985 | 44369  | 1 | 0 | 5  | 0         | 0.00666883 | 1  | 11 | 0.30102999 | 1.20557689 |
| chr15 | 54757985 | 548708   |        |   |   |    |           |            |    |    |            |            |

|       |          |          |        |   |   |   |            |            |   |    |            |            |
|-------|----------|----------|--------|---|---|---|------------|------------|---|----|------------|------------|
| chr15 | 57661994 | 57925843 | 263850 | 6 | 0 | 7 | 0          | 0.05232577 | 1 | 10 | 0.30102999 | 0.56314362 |
| chr15 | 57925843 | 58026953 | 101111 | 3 | 0 | 7 | 0          | 0.08584816 | 1 | 9  | 0.30102999 | 0.42015402 |
| chr15 | 58026953 | 58027012 | 60     | 1 | 1 | 7 | 0.1218695  | 0.05232577 | 1 | 10 | 0.1218695  | 0.56314362 |
| chr15 | 58027012 | 58064178 | 37167  | 1 | 1 | 7 | 0.1218695  | 0.13499366 | 1 | 8  | 0.1218695  | 0.30102999 |
| chr15 | 58064178 | 58246591 | 182414 | 2 | 1 | 6 | 0.1218695  | 0.08122616 | 1 | 8  | 0.1218695  | 0.4250187  |
| chr15 | 58246591 | 58246650 | 60     | 1 | 1 | 7 | 0.1218695  | 0.01667721 | 1 | 12 | 0.1218695  | 0.92532268 |
| chr15 | 58246650 | 58306244 | 59595  | 2 | 1 | 7 | 0.1218695  | 0.05232577 | 1 | 10 | 0.1218695  | 0.56314362 |
| chr15 | 58306244 | 58355879 | 49636  | 1 | 1 | 6 | 0.1218695  | 0.04875589 | 1 | 9  | 0.1218695  | 0.5732208  |
| chr15 | 58355879 | 58403749 | 47871  | 2 | 1 | 7 | 0.1218695  | 0.02793176 | 1 | 10 | 0.1218695  | 0.74627054 |
| chr15 | 58403749 | 58403808 | 60     | 1 | 1 | 8 | 0.1218695  | 0.08923391 | 1 | 10 | 0.1218695  | 0.4167287  |
| chr15 | 58403808 | 58439525 | 35718  | 1 | 1 | 6 | 0.1218695  | 0.08122616 | 1 | 8  | 0.1218695  | 0.4250187  |
| chr15 | 58439525 | 58719161 | 279637 | 4 | 1 | 5 | 0.1218695  | 0.04407651 | 1 | 8  | 0.1218695  | 0.58747015 |
| chr15 | 58719161 | 58890540 | 171380 | 7 | 1 | 5 | 0.1218695  | 0.02473314 | 1 | 9  | 0.1218695  | 0.76806864 |
| chr15 | 58890540 | 58961099 | 70560  | 2 | 0 | 5 | 0          | 0.02473314 | 1 | 9  | 0.30102999 | 0.76806864 |
| chr15 | 58961099 | 59009831 | 48733  | 2 | 0 | 5 | 0          | 0.01320236 | 1 | 10 | 0.30102999 | 0.97390707 |
| chr15 | 59009831 | 59132571 | 122741 | 4 | 0 | 5 | 0          | 0.00317045 | 1 | 12 | 0.30102999 | 1.46403142 |
| chr15 | 59132571 | 59190131 | 57561  | 2 | 0 | 5 | 0          | 0.01320236 | 1 | 10 | 0.30102999 | 0.97390707 |
| chr15 | 59190131 | 59224839 | 34709  | 2 | 0 | 5 | 0          | 0.00317045 | 1 | 12 | 0.30102999 | 1.46403142 |
| chr15 | 59224839 | 59297352 | 72514  | 2 | 0 | 5 | 0          | 0.00666883 | 1 | 11 | 0.30102999 | 1.20557689 |
| chr15 | 59297352 | 59412296 | 114945 | 6 | 0 | 5 | 0          | 0.01320236 | 1 | 10 | 0.30102999 | 0.97390707 |
| chr15 | 59412296 | 59533662 | 151267 | 3 | 0 | 5 | 0          | 0.02473314 | 1 | 9  | 0.30102999 | 0.76806864 |
| chr15 | 59533662 | 59683022 | 114661 | 5 | 1 | 0 | 0          | 0.01320236 | 1 | 10 | 0.30102999 | 0.97390707 |
| chr15 | 59683022 | 59858053 | 175072 | 4 | 0 | 5 | 0          | 0.02473314 | 1 | 9  | 0.30102999 | 0.76806864 |
| chr15 | 59858053 | 59948961 | 90869  | 3 | 1 | 5 | 0          | 0.01320236 | 1 | 10 | 0.30102999 | 0.97390707 |
| chr15 | 59948961 | 60171634 | 222674 | 4 | 0 | 4 | 0          | 0.01077081 | 1 | 9  | 0.30102999 | 1.01542894 |
| chr15 | 60171634 | 60171693 | 60     | 1 | 1 | 4 | 0          | 0.00247414 | 1 | 11 | 0.30102999 | 1.52371709 |
| chr15 | 60171693 | 60409503 | 237811 | 3 | 0 | 4 | 0          | 0.01077081 | 1 | 9  | 0.30102999 | 1.01542894 |
| chr15 | 60409503 | 60522477 | 112975 | 2 | 0 | 5 | 0          | 0.00666883 | 1 | 11 | 0.30102999 | 1.20557689 |
| chr15 | 60522477 | 60611078 | 88602  | 2 | 0 | 7 | 0          | 0.03037338 | 1 | 11 | 0.30102999 | 0.73110763 |
| chr15 | 60611078 | 60611137 | 60     | 1 | 1 | 8 | 0.05404976 | 0.03209037 | 2 | 12 | 0.30102999 | 0.72109894 |
| chr15 | 60611137 | 60687310 | 76174  | 1 | 1 | 7 | 0.05404976 | 0.03037338 | 2 | 11 | 0.30102999 | 0.73110763 |
| chr15 | 60687310 | 60873096 | 185787 | 5 | 1 | 7 | 0.05404976 | 0.05232577 | 2 | 10 | 0.30102999 | 0.56314362 |
| chr15 | 60873096 | 60873155 | 60     | 1 | 1 | 7 | 0.05404976 | 0.03037338 | 2 | 11 | 0.30102999 | 0.73110763 |
| chr15 | 60873155 | 60907084 | 33930  | 0 | 1 | 7 | 0          | 0.03037338 | 2 | 11 | 0.61140001 | 0.73110763 |
| chr15 | 60907084 | 60907143 | 60     | 1 | 0 | 8 | 0          | 0.05490675 | 2 | 11 | 0.61140001 | 0.55623409 |
| chr15 | 60907143 | 60956132 | 48990  | 1 | 0 | 7 | 0          | 0.05232577 | 2 | 10 | 0.61140001 | 0.56314362 |
| chr15 | 60956132 | 60956191 | 60     | 1 | 0 | 7 | 0          | 0.05232577 | 3 | 10 | 0.93173516 | 0.56314362 |
| chr15 | 60956191 | 61008218 | 52028  | 1 | 0 | 5 | 0          | 0.01320236 | 2 | 10 | 0.61140001 | 0.97390707 |
| chr15 | 61008218 | 61144210 | 135993 | 3 | 0 | 5 | 0          | 0.02473314 | 1 | 9  | 0.30102999 | 0.76806864 |
| chr15 | 61144210 | 61173635 | 29426  | 1 | 0 | 5 | 0          | 0.04407651 | 1 | 8  | 0.30102999 | 0.58747015 |
| chr15 | 61173635 | 61202405 | 28771  | 1 | 6 | 0 | 0.02438896 | 0.04875589 | 3 | 9  | 0.51676182 | 0.5732208  |
| chr15 | 61202405 | 61306920 | 104516 | 3 | 1 | 5 | 0.02438896 | 0.02473314 | 3 | 9  | 0.51676182 | 0.76806864 |
| chr15 | 61306920 | 61515965 | 209046 | 5 | 1 | 5 | 0.02438896 | 0.04407651 | 3 | 8  | 0.51676182 | 0.58747015 |
| chr15 | 61515965 | 61589872 | 73908  | 2 | 1 | 5 | 0.02438896 | 0.02473314 | 3 | 9  | 0.51676182 | 0.76806864 |
| chr15 | 61589872 | 61696482 | 106611 | 2 | 1 | 6 | 0.02438896 | 0.02793176 | 3 | 10 | 0.51676182 | 0.74627054 |
| chr15 | 61696482 | 61889418 | 192937 | 2 | 0 | 4 | 0          | 0.02074938 | 3 | 8  | 0.93173516 | 0.79906872 |
| chr15 | 61889418 | 61889477 | 60     | 1 | 0 | 5 | 0          | 0.04407651 | 3 | 8  | 0.93173516 | 0.58747015 |
| chr15 | 61889477 | 62015898 | 126422 | 1 | 0 | 4 | 0          | 0.02074938 | 3 | 8  | 0.93173516 | 0.79906872 |
| chr15 | 62015898 | 62149361 | 134644 | 2 | 0 | 4 | 0          | 0.06713722 | 3 | 6  | 0.93173516 | 0.44141547 |
| chr15 | 62149361 | 62276184 | 126824 | 3 | 2 | 4 | 0          | 0.11390336 | 2 | 5  | 0.61140001 | 0.30102999 |
| chr15 | 62276184 | 62276243 | 60     | 1 | 0 | 4 | 0          | 0.11390336 | 3 | 5  | 0.93173516 | 0.30102999 |
| chr15 | 62276243 | 62313878 | 37636  | 1 | 0 | 3 | 0          | 0.05670724 | 2 | 5  | 0.61140001 | 0.45545077 |
| chr15 | 62313878 | 62350092 | 36215  | 1 | 0 | 3 | 0          | 0.17593012 | 3 | 3  | 0.61140001 | 0.17593012 |
| chr15 | 62350092 | 62350151 | 60     | 1 | 0 | 4 | 0          | 0.30102999 | 3 | 3  | 0.93173516 | 0.10122019 |
| chr15 | 62350151 | 62533005 | 182855 | 4 | 0 | 2 | 0          | 0.08289318 | 3 | 3  | 0.93173516 | 0.30102999 |
| chr15 | 62533005 | 62599021 | 66017  | 1 | 0 | 1 | 0          | 0.02438896 | 3 | 3  | 0.93173516 | 0.51676182 |
| chr15 | 62599021 | 62599080 | 60     | 1 | 0 | 3 | 0          | 0.17593012 | 3 | 3  | 0.93173516 | 0.17593012 |
| chr15 | 62599080 | 62681205 | 82126  | 1 | 0 | 2 | 0          | 0.08289318 | 3 | 3  | 0.93173516 | 0.30102999 |
| chr15 | 62681205 | 62681264 | 60     | 1 | 2 | 2 | 0.08289318 | 0.0429175  | 3 | 4  | 0.30102999 | 0.47744371 |
| chr15 | 62681264 | 62769295 | 88032  | 1 | 2 | 2 | 0.02438896 | 0.0429175  | 3 | 4  | 0.51676182 | 0.47744371 |
| chr15 | 62769295 | 62840351 | 71057  | 2 | 1 | 2 | 0.02438896 | 0.02162467 | 3 | 5  | 0.51676182 | 0.68214471 |
| chr15 | 62840351 | 62931717 | 91367  | 1 | 0 | 1 | 0          | 0.00478973 | 3 | 5  | 0.93173516 | 1.02643191 |
| chr15 | 62931717 | 63042626 | 110910 | 2 | 0 | 1 | 0          | 0.02438896 | 3 | 3  | 0.93173516 | 0.51676182 |
| chr15 | 63042626 | 63083627 | 41002  | 2 | 0 | 2 | 0.02438896 | 0.0429175  | 3 | 4  | 0.51676182 | 0.47744371 |
| chr15 | 63083627 | 63108325 | 24699  | 2 | 1 | 3 | 0          | 0.02438896 | 3 | 4  | 0.51676182 | 0.30102999 |
| chr15 | 63108325 | 63191165 | 82841  | 3 | 1 | 3 | 0.02438896 | 0.05670724 | 3 | 5  | 0.51676182 | 0.45545077 |
| chr15 | 63191165 | 63191224 | 60     | 1 | 1 | 3 | 0          | 0.02438896 | 3 | 6  | 0.51676182 | 0.63695542 |
| chr15 | 63191224 | 63270442 | 79219  | 1 | 1 | 3 | 0.02438896 | 0.05670724 | 3 | 5  | 0.51676182 | 0.45545077 |
| chr15 | 63270442 | 63270501 | 60     | 1 | 1 | 3 | 0.01091641 | 0.05670724 | 4 | 4  | 0.76005302 | 0.45545077 |
| chr15 | 63270501 | 63446219 | 175719 | 5 | 1 | 2 | 0.01091641 | 0.02162467 | 4 | 5  | 0.76005302 | 0.68214471 |
| chr15 | 63446219 | 63446278 | 60     | 1 | 1 | 3 | 0.01091641 | 0.05670724 | 4 | 5  | 0.76005302 | 0.45545077 |
| chr15 | 63446278 | 63484498 | 38221  | 1 | 1 | 3 | 0.02438896 | 0.05670724 | 3 | 5  | 0.51676182 | 0.45545077 |
| chr15 | 63484498 | 63484557 | 60     | 1 | 1 | 3 | 0.02438896 | 0.01598258 | 3 | 7  | 0.51676182 | 0.84395715 |
| chr15 | 63484557 | 63516922 | 32366  | 1 | 1 | 3 | 0.02438896 | 0.03070643 | 3 | 6  | 0.51676182 | 0.63695542 |
| chr15 | 63516922 | 63644116 | 127195 | 6 | 1 | 3 | 0.01091641 | 0.03070643 | 4 | 6  | 0.76005302 | 0.63695542 |
| chr15 | 63644116 | 63655430 | 11315  | 1 | 1 | 3 | 0.01091641 | 0.05670724 | 4 | 5  | 0.76005302 | 0.45545077 |
| chr15 | 63655430 | 63673319 | 17890  | 1 | 1 | 3 | 0.01091641 | 0.0122019  | 4 | 4  | 0.76005302 | 0.30102999 |
| chr15 | 63673319 | 63887210 | 213892 | 4 | 1 | 3 | 0.01091641 | 0.05670724 | 4 | 5  | 0.76005302 | 0.45545077 |
| chr15 | 63887210 | 63887269 | 60     | 1 | 1 | 3 | 0.01091641 | 0.03070643 | 4 | 6  | 0.76005302 | 0.63695542 |
| chr15 | 63887269 | 63944685 | 57417  | 1 | 1 | 3 | 0.01091641 | 0.05670724 | 4 | 5  | 0.76005302 | 0.45545077 |
| chr15 | 63944685 | 63991101 | 46417  | 2 | 1 | 4 | 0.01091641 | 0.11390336 | 4 | 5  | 0.76005302 | 0.30102999 |
| chr15 | 63991101 | 64041840 | 50740  | 1 | 1 | 3 | 0.01091641 | 0.05670724 | 4 | 5  | 0.76005302 | 0.45545077 |
| chr15 | 64041840 | 64041899 | 60     | 1 | 2 | 3 | 0.0429175  | 0.05670724 | 4 | 5  | 0.47744371 | 0.45545077 |
| chr15 | 64041899 | 64104624 | 62726  | 1 | 1 | 3 | 0.02438896 | 0.05670724 | 3 | 5  | 0.51676182 | 0.45545077 |
| chr15 | 64104624 | 64104683 | 60     | 1 | 2 | 3 | 0.0429175  | 0.03070643 | 4 | 6  | 0.47744371 | 0.63695542 |
| chr15 | 64104683 | 64162552 | 57870  | 2 | 1 | 3 | 0.02438896 | 0.05670724 | 3 | 5  | 0.51676182 | 0.45545077 |
| chr15 | 64162552 | 64226370 | 63819  | 3 | 2 | 3 | 0.08289318 | 0.05670724 | 3 | 5  | 0.30102999 | 0.45545077 |
| chr15 | 64226370 | 64297458 | 71089  | 4 | 2 | 3 | 0.08289318 | 0.03070643 | 6 | 6  | 0.30102999 | 0.63695542 |
| chr15 | 64297458 | 64297517 | 60     | 1 | 3 | 4 | 0.17593012 | 0.06713722 | 3 | 6  | 0.17593012 | 0.44141547 |
| chr15 | 64297517 | 64378725 | 81209  | 2 | 2 | 4 | 0.08289318 | 0.11390336 | 3 | 5  | 0.30102999 | 0.30102999 |
| chr15 | 64378725 | 64378784 | 60     | 1 | 3 | 5 | 0.10122019 | 0.12309572 | 4 | 6  | 0.30102999 | 0.30102999 |
| chr15 | 64378784 | 64446344 | 67561  | 2 | 3 | 4 | 0.10122019 | 0.03070643 | 6 | 6  | 0.30102999 |            |

|       |          |          |        |   |   |            |            |            |   |            |            |            |
|-------|----------|----------|--------|---|---|------------|------------|------------|---|------------|------------|------------|
| chr15 | 66276468 | 66327917 | 51450  | 2 | 6 | 3          | 0.91219088 | 0.10122019 | 2 | 4          | 0.01053319 | 0.30102999 |
| chr15 | 66327917 | 66327976 | 60     | 1 | 6 | 3          | 0.63695542 | 0.10122019 | 3 | 4          | 0.03070643 | 0.30102999 |
| chr15 | 66327976 | 66489504 | 161529 | 3 | 6 | 3          | 0.91219088 | 0.17593012 | 2 | 3          | 0.17593012 | 0.30102999 |
| chr15 | 66489504 | 66542274 | 52771  | 1 | 6 | 3          | 1.31360226 | 0.17593012 | 1 | 3          | 0.00204627 | 0.17593012 |
| chr15 | 66542274 | 66643638 | 101365 | 2 | 5 | 2          | 1.02643191 | 0.08289318 | 1 | 3          | 0.00478973 | 0.30102999 |
| chr15 | 66643638 | 66648676 | 5039   | 2 | 5 | 3          | 1.02643191 | 0.17593012 | 1 | 3          | 0.00478973 | 0.17593012 |
| chr15 | 66648676 | 66694589 | 45914  | 1 | 5 | 1          | 1.02643191 | 0.02438896 | 1 | 3          | 0.00478973 | 0.51676182 |
| chr15 | 66694589 | 66714396 | 19808  | 2 | 5 | 1          | 1.02643191 | 0.01091641 | 1 | 4          | 0.00478973 | 0.76005302 |
| chr15 | 66714396 | 66788452 | 74057  | 3 | 5 | 3          | 0.68214471 | 0.05670724 | 2 | 5          | 0.02162467 | 0.45545077 |
| chr15 | 66788452 | 66796563 | 8112   | 2 | 6 | 3          | 0.91219088 | 0.05670724 | 2 | 5          | 0.01053319 | 0.45545077 |
| chr15 | 66796563 | 66841841 | 45279  | 3 | 5 | 3          | 0.68214471 | 0.05670724 | 2 | 5          | 0.02162467 | 0.45545077 |
| chr15 | 66841841 | 66971863 | 130023 | 2 | 4 | 2          | 0.76005302 | 0.0429175  | 1 | 4          | 0.01091641 | 0.47744371 |
| chr15 | 66971863 | 66971922 | 60     | 1 | 4 | 2          | 0.47744371 | 0.02162467 | 2 | 5          | 0.0429175  | 0.68214471 |
| chr15 | 66971922 | 67074131 | 102210 | 3 | 4 | 2          | 0.47744371 | 0.08289318 | 2 | 3          | 0.0429175  | 0.30102999 |
| chr15 | 67074131 | 67152783 | 78653  | 1 | 4 | 2          | 0.76005302 | 0.08289318 | 1 | 3          | 0.01091641 | 0.30102999 |
| chr15 | 67152783 | 67152842 | 60     | 1 | 5 | 2          | 1.02643191 | 0.08289318 | 1 | 3          | 0.00478973 | 0.30102999 |
| chr15 | 67152842 | 67366720 | 213879 | 3 | 4 | 2          | 0.76005302 | 0.08289318 | 1 | 3          | 0.01091641 | 0.30102999 |
| chr15 | 67366720 | 67427926 | 61207  | 2 | 2 | 2          | 0.51676182 | 0.08289318 | 1 | 3          | 0.02438896 | 0.30102999 |
| chr15 | 67427926 | 67427985 | 60     | 1 | 4 | 2          | 0.76005302 | 0.08289318 | 1 | 3          | 0.01091641 | 0.30102999 |
| chr15 | 67427985 | 67620954 | 192970 | 4 | 4 | 2          | 0.51676182 | 0.08289318 | 1 | 3          | 0.02438896 | 0.30102999 |
| chr15 | 67620954 | 67621013 | 60     | 1 | 4 | 2          | 0.47744371 | 0.08289318 | 2 | 3          | 0.0429175  | 0.30102999 |
| chr15 | 67621013 | 67655817 | 44805  | 1 | 4 | 1          | 0.47744371 | 0.02438896 | 2 | 3          | 0.0429175  | 0.51676182 |
| chr15 | 67655817 | 67713860 | 48004  | 1 | 3 | 1          | 0.51676182 | 0.02438896 | 1 | 1          | 0.02438896 | 0.51676182 |
| chr15 | 67713860 | 67713918 | 59     | 1 | 3 | 2          | 0.51676182 | 0.0429175  | 1 | 4          | 0.02438896 | 0.47744371 |
| chr15 | 67713918 | 67785927 | 72010  | 2 | 3 | 2          | 0.93173516 | 0.08289318 | 0 | 3          | 0          | 0.30102999 |
| chr15 | 67785927 | 67852792 | 66866  | 3 | 1 | 0.93173516 | 0.02438896 | 0          | 3 | 0          | 0.51676182 |            |
| chr15 | 67852792 | 67885201 | 32410  | 2 | 3 | 3          | 0.93173516 | 0.17593012 | 0 | 3          | 0          | 0.17593012 |
| chr15 | 67885201 | 67979736 | 94536  | 2 | 3 | 1          | 0.93173516 | 0.02438896 | 0 | 3          | 0          | 0.51676182 |
| chr15 | 67979736 | 68032222 | 52487  | 2 | 3 | 3          | 0.93173516 | 0.10122019 | 0 | 4          | 0          | 0.30102999 |
| chr15 | 68032222 | 68126660 | 94439  | 3 | 4 | 0.93173516 | 0.11390336 | 0          | 5 | 0          | 0.30102999 |            |
| chr15 | 68126660 | 68252193 | 125534 | 2 | 3 | 5          | 0.93173516 | 0.19510895 | 0 | 5          | 0          | 0.19510895 |
| chr15 | 68252193 | 68348315 | 96123  | 2 | 4 | 0.93173516 | 0.11390336 | 0          | 5 | 0          | 0.30102999 |            |
| chr15 | 68348315 | 68379002 | 30688  | 2 | 4 | 0.51676182 | 0.11390336 | 1          | 5 | 0.02438896 | 0.30102999 |            |
| chr15 | 68379002 | 68501216 | 122215 | 4 | 4 | 0.76005302 | 0.11390336 | 1          | 5 | 0.01091641 | 0.30102999 |            |
| chr15 | 68501216 | 68712649 | 211434 | 6 | 3 | 4          | 0.51676182 | 0.11390336 | 1 | 5          | 0.02438896 | 0.30102999 |
| chr15 | 68712649 | 68828817 | 116169 | 3 | 4 | 4          | 0.51676182 | 0.18734596 | 1 | 4          | 0.02438896 | 0.18734596 |
| chr15 | 68828817 | 68828876 | 60     | 1 | 3 | 4          | 0.30102999 | 0.18734596 | 2 | 4          | 0.08289318 | 0.18734596 |
| chr15 | 68828876 | 68944263 | 115388 | 3 | 3 | 3          | 0.30102999 | 0.10122019 | 2 | 4          | 0.08289318 | 0.30102999 |
| chr15 | 68944263 | 69048772 | 104510 | 3 | 3 | 3          | 0.51676182 | 0.10122019 | 1 | 4          | 0.02438896 | 0.30102999 |
| chr15 | 69048772 | 69048831 | 60     | 1 | 3 | 3          | 0.30102999 | 0.10122019 | 2 | 4          | 0.08289318 | 0.30102999 |
| chr15 | 69048831 | 69097170 | 48340  | 4 | 3 | 3          | 0.51676182 | 0.10122019 | 4 | 4          | 0.02438896 | 0.30102999 |
| chr15 | 69097170 | 69277707 | 180538 | 4 | 3 | 4          | 0.51676182 | 0.18734596 | 4 | 4          | 0.02438896 | 0.18734596 |
| chr15 | 69277707 | 69349483 | 71777  | 4 | 3 | 4          | 0.51676182 | 0.11390336 | 1 | 5          | 0.02438896 | 0.30102999 |
| chr15 | 69349483 | 69464125 | 114643 | 2 | 2 | 4          | 0.30102999 | 0.11390336 | 5 | 5          | 0.05404976 | 0.30102999 |
| chr15 | 69464125 | 69464184 | 60     | 1 | 3 | 4          | 0.51676182 | 0.11390336 | 1 | 5          | 0.02438896 | 0.30102999 |
| chr15 | 69464184 | 69562009 | 97826  | 2 | 4 | 4          | 0.51676182 | 0.18734596 | 1 | 4          | 0.02438896 | 0.18734596 |
| chr15 | 69562009 | 69698611 | 136603 | 3 | 2 | 4          | 0.30102999 | 0.18734596 | 1 | 4          | 0.05404976 | 0.18734596 |
| chr15 | 69698611 | 69698670 | 60     | 1 | 3 | 4          | 0.51676182 | 0.18734596 | 1 | 4          | 0.02438896 | 0.18734596 |
| chr15 | 69698670 | 69715537 | 16688  | 1 | 3 | 4          | 0.51676182 | 0.30102999 | 1 | 3          | 0.02438896 | 0.10122019 |
| chr15 | 69715537 | 69841169 | 125633 | 5 | 3 | 4          | 0.30102999 | 0.30102999 | 2 | 3          | 0.08289318 | 0.10122019 |
| chr15 | 69841169 | 69906325 | 65157  | 1 | 3 | 4          | 0.51676182 | 0.30102999 | 1 | 3          | 0.02438896 | 0.10122019 |
| chr15 | 69906325 | 70167271 | 260947 | 3 | 3 | 3          | 0.51676182 | 0.17593012 | 3 | 3          | 0.02438896 | 0.17593012 |
| chr15 | 70167271 | 70263331 | 90601  | 2 | 3 | 4          | 0.51676182 | 0.18734596 | 1 | 4          | 0.02438896 | 0.18734596 |
| chr15 | 70263331 | 70344154 | 80824  | 1 | 3 | 3          | 0.51676182 | 0.17593012 | 1 | 4          | 0.02438896 | 0.17593012 |
| chr15 | 70344154 | 70461816 | 117663 | 4 | 3 | 2          | 0.51676182 | 0.08289318 | 1 | 3          | 0.02438896 | 0.30102999 |
| chr15 | 70461816 | 70513991 | 52176  | 2 | 3 | 3          | 0.51676182 | 0.17593012 | 1 | 3          | 0.02438896 | 0.17593012 |
| chr15 | 70513991 | 70897776 | 383786 | 4 | 3 | 2          | 0.51676182 | 0.08289318 | 1 | 3          | 0.02438896 | 0.30102999 |
| chr15 | 70897776 | 70961859 | 64084  | 2 | 3 | 3          | 0.51676182 | 0.17593012 | 1 | 3          | 0.02438896 | 0.17593012 |
| chr15 | 70961859 | 71063098 | 101240 | 4 | 3 | 3          | 0.51676182 | 0.10122019 | 1 | 4          | 0.02438896 | 0.30102999 |
| chr15 | 71063098 | 71094817 | 31720  | 1 | 3 | 2          | 0.51676182 | 0.08289318 | 1 | 3          | 0.02438896 | 0.30102999 |
| chr15 | 71094817 | 71140166 | 45350  | 2 | 3 | 2          | 0.30102999 | 0.08289318 | 2 | 3          | 0.08289318 | 0.30102999 |
| chr15 | 71140166 | 71140225 | 60     | 1 | 4 | 2          | 0.47744371 | 0.0429175  | 2 | 4          | 0.47744371 | 0.47744371 |
| chr15 | 71140225 | 71272476 | 132252 | 3 | 2 | 2          | 0.51676182 | 0.0429175  | 1 | 4          | 0.02438896 | 0.47744371 |
| chr15 | 71272476 | 71300851 | 28376  | 2 | 2 | 4          | 0.30102999 | 0.0429175  | 2 | 4          | 0.08289318 | 0.47744371 |
| chr15 | 71300851 | 71300910 | 60     | 1 | 4 | 2          | 0.47744371 | 0.0429175  | 2 | 4          | 0.47744371 | 0.47744371 |
| chr15 | 71300910 | 71341978 | 41069  | 1 | 4 | 1          | 0.76005302 | 0.01091641 | 1 | 4          | 0.01091641 | 0.76005302 |
| chr15 | 71341978 | 71403932 | 61955  | 2 | 4 | 1          | 0.76005302 | 0.02438896 | 1 | 3          | 0.01091641 | 0.51676182 |
| chr15 | 71403932 | 71403991 | 60     | 1 | 4 | 1          | 0.76005302 | 0.01091641 | 1 | 1          | 0.01091641 | 0.76005302 |
| chr15 | 71403991 | 71436645 | 32655  | 1 | 3 | 1          | 0.51676182 | 0.02438896 | 1 | 3          | 0.02438896 | 0.51676182 |
| chr15 | 71436645 | 71436704 | 60     | 1 | 3 | 1          | 0.30102999 | 0.02438896 | 2 | 3          | 0.08289318 | 0.51676182 |
| chr15 | 71436704 | 71481228 | 44525  | 1 | 3 | 1          | 0.51676182 | 0.02438896 | 1 | 3          | 0.02438896 | 0.51676182 |
| chr15 | 71481228 | 71508619 | 27392  | 2 | 4 | 1          | 0.47744371 | 0.02438896 | 2 | 3          | 0.0429175  | 0.51676182 |
| chr15 | 71508619 | 71563115 | 54497  | 2 | 3 | 1          | 0.30102999 | 0.02438896 | 2 | 3          | 0.08289318 | 0.51676182 |
| chr15 | 71563115 | 71618147 | 55033  | 1 | 3 | 1          | 0.30102999 | 0.05404976 | 1 | 2          | 0.08289318 | 0.30102999 |
| chr15 | 71618147 | 71679548 | 61402  | 2 | 4 | 1          | 0.47744371 | 0.05404976 | 2 | 2          | 0.0429175  | 0.30102999 |
| chr15 | 71679548 | 71679607 | 60     | 1 | 4 | 2          | 0.47744371 | 0.08289318 | 2 | 3          | 0.0429175  | 0.30102999 |
| chr15 | 71679607 | 71853137 | 173531 | 3 | 4 | 1          | 0.47744371 | 0.02438896 | 2 | 3          | 0.0429175  | 0.51676182 |
| chr15 | 71853137 | 71853196 | 60     | 1 | 4 | 2          | 0.47744371 | 0.08289318 | 1 | 3          | 0.0429175  | 0.30102999 |
| chr15 | 71853196 | 71959194 | 105999 | 2 | 1 | 0.30102999 | 0.05404976 | 2          | 2 | 0.08289318 | 0.30102999 |            |
| chr15 | 71959194 | 72006139 | 46946  | 1 | 3 | 1          | 0.93173516 | 0.05404976 | 0 | 2          | 0          | 0.30102999 |
| chr15 | 72006139 | 72036192 | 30054  | 2 | 3 | 1          | 0.51676182 | 0.02438896 | 1 | 3          | 0.02438896 | 0.51676182 |
| chr15 | 72036192 | 72070990 | 34799  | 2 | 4 | 2          | 0.76005302 | 0.08289318 | 1 | 3          | 0.01091641 | 0.30102999 |
| chr15 | 72070990 | 72143703 | 72714  | 2 | 4 | 2          | 1.26272838 | 0.08289318 | 0 | 3          | 0.30102999 | 0.30102999 |
| chr15 | 72143703 | 72143762 | 60     | 1 | 4 | 2          | 0.76005302 | 0.08289318 | 1 | 3          | 0.01091641 | 0.30102999 |
| chr15 | 72143762 | 72297797 | 154036 | 4 | 4 | 1          | 0.93173516 | 0.05404976 | 0 | 2          | 0.30102999 | 0.30102999 |
| chr15 | 72297797 | 72403103 | 105307 | 3 | 3 | 2          | 0.93173516 | 0.1575501  | 2 | 0          | 0          | 0.1575501  |
| chr15 | 72403103 | 72508018 | 104916 | 4 | 3 | 2          | 0.93173516 | 0.08289318 | 0 | 3          | 0.30102999 | 0.30102999 |
| chr15 | 72508018 | 72508077 | 60     | 1 | 3 | 2          | 0.93173516 | 0.0429175  | 0 | 4          | 0.47744371 | 0.47744371 |
| chr15 | 72508077 | 72603131 | 95055  | 2 | 3 | 1          | 0.93173516 | 0.02438896 | 0 | 3          | 0.51676182 | 0.51676182 |
| chr15 | 72603131 | 72645620 | 42490  | 2 | 3 | 1          | 0.93173516 | 0.01091641 | 0 | 4          | 0.76005302 | 0.76005302 |
| chr15 | 72645620 | 72670081 | 24462  | 1 | 3 | 1          | 0.93173516 | 0.02438896 | 0 | 3          |            |            |

|       |          |          |        |    |   |   |            |            |   |    |            |            |
|-------|----------|----------|--------|----|---|---|------------|------------|---|----|------------|------------|
| chr15 | 76280221 | 76364378 | 84158  | 2  | 5 | 4 | 1.02643191 | 0.06713722 | 1 | 6  | 0.00478973 | 0.44141547 |
| chr15 | 76364378 | 76364437 | 60     | 1  | 5 | 4 | 1.02643191 | 0.02074938 | 1 | 8  | 0.00478973 | 0.79906872 |
| chr15 | 76364437 | 76451027 | 86591  | 2  | 5 | 4 | 1.02643191 | 0.06713722 | 1 | 6  | 0.00478973 | 0.44141547 |
| chr15 | 76451027 | 76497150 | 46124  | 2  | 5 | 4 | 1.02643191 | 0.02074938 | 1 | 8  | 0.00478973 | 0.79906872 |
| chr15 | 76497150 | 76602835 | 105686 | 4  | 5 | 4 | 1.02643191 | 0.01077081 | 1 | 9  | 0.00478973 | 1.01542894 |
| chr15 | 76602835 | 76640635 | 37801  | 3  | 5 | 4 | 1.02643191 | 0.00530919 | 1 | 10 | 0.00478973 | 1.2568129  |
| chr15 | 76640635 | 76914185 | 273551 | 6  | 4 | 4 | 0.76005302 | 0.00530919 | 1 | 10 | 0.01091641 | 1.2568129  |
| chr15 | 76914185 | 76989204 | 75020  | 2  | 4 | 4 | 0.51676182 | 0.00530919 | 1 | 10 | 0.02438896 | 1.2568129  |
| chr15 | 76989204 | 76989263 | 60     | 1  | 4 | 4 | 0.76005302 | 0.00530919 | 1 | 10 | 0.01091641 | 1.2568129  |
| chr15 | 76989263 | 77227933 | 238671 | 6  | 3 | 4 | 0.51676182 | 0.00530919 | 1 | 10 | 0.02438896 | 1.2568129  |
| chr15 | 77227933 | 77485760 | 257828 | 7  | 3 | 4 | 0.51676182 | 0.01077081 | 1 | 9  | 0.02438896 | 1.01542894 |
| chr15 | 77485760 | 77516641 | 30882  | 3  | 4 | 4 | 0.76005302 | 0.01077081 | 1 | 9  | 0.01091641 | 1.01542894 |
| chr15 | 77516641 | 77729763 | 213123 | 3  | 4 | 4 | 0.51676182 | 0.01077081 | 1 | 9  | 0.02438896 | 1.01542894 |
| chr15 | 77729763 | 77960084 | 230322 | 5  | 4 | 4 | 0.76005302 | 0.01077081 | 1 | 9  | 0.01091641 | 1.01542894 |
| chr15 | 77960084 | 78050354 | 90271  | 1  | 3 | 4 | 0.51676182 | 0.01077081 | 1 | 9  | 0.02438896 | 1.01542894 |
| chr15 | 78050354 | 78387402 | 337049 | 6  | 3 | 3 | 0.51676182 | 0.00796414 | 1 | 8  | 0.02438896 | 1.07548421 |
| chr15 | 78387402 | 78442369 | 54968  | 2  | 3 | 3 | 0.51676182 | 0.01598258 | 1 | 7  | 0.02438896 | 0.84395715 |
| chr15 | 78442369 | 78452401 | 10033  | 2  | 3 | 3 | 0.51676182 | 0.00796414 | 1 | 8  | 0.02438896 | 1.07548421 |
| chr15 | 78452401 | 78610792 | 158392 | 8  | 3 | 3 | 0.51676182 | 0.01598258 | 1 | 7  | 0.02438896 | 0.84395715 |
| chr15 | 78610792 | 78715923 | 105132 | 4  | 3 | 3 | 0.76005302 | 0.01598258 | 1 | 7  | 0.01091641 | 0.84395715 |
| chr15 | 78715923 | 78751516 | 38594  | 2  | 4 | 3 | 0.76005302 | 0.00796414 | 1 | 8  | 0.01091641 | 1.07548421 |
| chr15 | 78751516 | 78825248 | 73723  | 3  | 3 | 3 | 0.51676182 | 0.01598258 | 1 | 7  | 0.02438896 | 0.84395715 |
| chr15 | 78825248 | 78906848 | 81601  | 6  | 4 | 3 | 0.47744371 | 0.00796414 | 1 | 8  | 0.02438896 | 1.07548421 |
| chr15 | 78906848 | 78925544 | 18697  | 1  | 3 | 3 | 0.51676182 | 0.01598258 | 1 | 7  | 0.02438896 | 0.84395715 |
| chr15 | 78925544 | 79084484 | 158941 | 2  | 3 | 3 | 0.51676182 | 0.03070643 | 1 | 6  | 0.02438896 | 0.63695542 |
| chr15 | 79084484 | 79164770 | 80287  | 2  | 3 | 3 | 0.30102999 | 0.03070643 | 1 | 6  | 0.08289318 | 0.63695542 |
| chr15 | 79164770 | 79254405 | 89636  | 4  | 3 | 3 | 0.30102999 | 0.00796414 | 2 | 8  | 0.08289318 | 1.07548421 |
| chr15 | 79254405 | 79380251 | 125847 | 3  | 3 | 3 | 0.30102999 | 0.01598258 | 2 | 7  | 0.08289318 | 0.84395715 |
| chr15 | 79380251 | 79822208 | 441958 | 10 | 3 | 3 | 0.30102999 | 0.05670724 | 2 | 5  | 0.08289318 | 0.45545077 |
| chr15 | 79822208 | 79952802 | 130595 | 3  | 3 | 3 | 0.30102999 | 0.10122019 | 2 | 4  | 0.08289318 | 0.30102999 |
| chr15 | 79952802 | 80145140 | 192339 | 4  | 4 | 3 | 0.47744371 | 0.10122019 | 2 | 4  | 0.0429175  | 0.30102999 |
| chr15 | 80145140 | 80181627 | 36488  | 2  | 5 | 3 | 0.68214471 | 0.10122019 | 2 | 4  | 0.02162467 | 0.30102999 |
| chr15 | 80181627 | 80190162 | 8536   | 2  | 5 | 3 | 0.45545077 | 0.10122019 | 3 | 4  | 0.05670724 | 0.30102999 |
| chr15 | 80190162 | 80254840 | 64679  | 1  | 5 | 3 | 0.45545077 | 0.17593012 | 3 | 3  | 0.05670724 | 0.17593012 |
| chr15 | 80254840 | 80282688 | 27849  | 1  | 4 | 2 | 0.45545077 | 0.08289318 | 3 | 3  | 0.05670724 | 0.30102999 |
| chr15 | 80282688 | 80375633 | 92946  | 1  | 5 | 2 | 0.47744371 | 0.08289318 | 2 | 3  | 0.0429175  | 0.30102999 |
| chr15 | 80375633 | 80446076 | 70444  | 2  | 4 | 3 | 0.47744371 | 0.17593012 | 3 | 4  | 0.0429175  | 0.17593012 |
| chr15 | 80446076 | 80571198 | 125123 | 5  | 5 | 3 | 0.30102999 | 0.10122019 | 4 | 4  | 0.11390336 | 0.30102999 |
| chr15 | 80571198 | 80608952 | 37755  | 2  | 6 | 3 | 0.44141547 | 0.10122019 | 4 | 4  | 0.06713722 | 0.30102999 |
| chr15 | 80608952 | 80754817 | 145866 | 6  | 2 | 2 | 0.63695542 | 0.0429175  | 3 | 4  | 0.03070643 | 0.47744371 |
| chr15 | 80754817 | 81027670 | 272854 | 7  | 6 | 3 | 0.63695542 | 0.10122019 | 3 | 4  | 0.03070643 | 0.30102999 |
| chr15 | 81027670 | 81108360 | 80691  | 6  | 2 | 2 | 0.63695542 | 0.0429175  | 3 | 4  | 0.03070643 | 0.47744371 |
| chr15 | 81108360 | 81306260 | 197901 | 7  | 6 | 2 | 0.44141547 | 0.0429175  | 4 | 4  | 0.06713722 | 0.47744371 |
| chr15 | 81306260 | 81429054 | 122795 | 2  | 6 | 2 | 0.63695542 | 0.0429175  | 3 | 4  | 0.03070643 | 0.47744371 |
| chr15 | 81429054 | 81429113 | 60     | 1  | 6 | 3 | 0.63695542 | 0.10122019 | 3 | 4  | 0.03070643 | 0.30102999 |
| chr15 | 81429113 | 81552687 | 123575 | 3  | 5 | 2 | 0.45545077 | 0.0429175  | 3 | 4  | 0.05670724 | 0.47744371 |
| chr15 | 81552687 | 81614725 | 62039  | 3  | 5 | 3 | 0.45545077 | 0.10122019 | 3 | 4  | 0.05670724 | 0.30102999 |
| chr15 | 81614725 | 81665035 | 50311  | 3  | 5 | 3 | 0.45545077 | 0.05670724 | 3 | 5  | 0.05670724 | 0.45545077 |
| chr15 | 81665035 | 81705267 | 40233  | 1  | 5 | 2 | 0.45545077 | 0.0429175  | 4 | 4  | 0.05670724 | 0.47744371 |
| chr15 | 81705267 | 81819038 | 113772 | 1  | 4 | 2 | 0.30102999 | 0.0429175  | 3 | 4  | 0.10122019 | 0.47744371 |
| chr15 | 81819038 | 81922756 | 103719 | 1  | 4 | 2 | 0.30102999 | 0.08289318 | 3 | 3  | 0.10122019 | 0.30102999 |
| chr15 | 81922756 | 82069629 | 146874 | 1  | 3 | 2 | 0.30102999 | 0.08289318 | 3 | 3  | 0.08289318 | 0.30102999 |
| chr15 | 82069629 | 82069688 | 60     | 1  | 3 | 2 | 0.30102999 | 0.0429175  | 2 | 4  | 0.08289318 | 0.47744371 |
| chr15 | 82069688 | 82256100 | 186413 | 2  | 3 | 1 | 0.30102999 | 0.01091641 | 4 | 4  | 0.08289318 | 0.76005302 |
| chr15 | 82256100 | 82256159 | 60     | 1  | 3 | 2 | 0.30102999 | 0.0429175  | 2 | 4  | 0.08289318 | 0.47744371 |
| chr15 | 82256159 | 82422588 | 166430 | 2  | 2 | 2 | 0.1575501  | 0.08289318 | 3 | 3  | 0.1575501  | 0.30102999 |
| chr15 | 82422588 | 82463416 | 40829  | 2  | 3 | 3 | 0.30102999 | 0.17593012 | 2 | 3  | 0.08289318 | 0.17593012 |
| chr15 | 82463416 | 82564197 | 100782 | 2  | 2 | 3 | 0.1575501  | 0.17593012 | 2 | 3  | 0.1575501  | 0.17593012 |
| chr15 | 82564197 | 82564256 | 60     | 1  | 3 | 3 | 0.30102999 | 0.17593012 | 2 | 3  | 0.08289318 | 0.17593012 |
| chr15 | 82564256 | 83214012 | 649757 | 1  | 3 | 3 | 0.30102999 | 0.30102999 | 2 | 2  | 0.08289318 | 0.08289318 |
| chr15 | 83214012 | 83240239 | 26228  | 3  | 3 | 3 | 0.30102999 | 0.05670724 | 2 | 2  | 0.08289318 | 0.45545077 |
| chr15 | 83240239 | 83240290 | 52     | 1  | 3 | 3 | 0.30102999 | 0.03070643 | 6 | 6  | 0.08289318 | 0.63695542 |
| chr15 | 83240290 | 83295965 | 55676  | 2  | 3 | 3 | 0.30102999 | 0.10122019 | 4 | 4  | 0.08289318 | 0.30102999 |
| chr15 | 83295965 | 83528428 | 232464 | 7  | 3 | 3 | 0.30102999 | 0.05670724 | 2 | 4  | 0.08289318 | 0.45545077 |
| chr15 | 83528428 | 83561391 | 32964  | 3  | 3 | 3 | 0.10122019 | 0.05670724 | 4 | 5  | 0.30102999 | 0.45545077 |
| chr15 | 83561391 | 83673944 | 112554 | 2  | 3 | 3 | 0.10122019 | 0.05670724 | 4 | 5  | 0.30102999 | 0.30102999 |
| chr15 | 83673944 | 83867060 | 193117 | 6  | 4 | 3 | 0.10122019 | 0.05670724 | 4 | 4  | 0.30102999 | 0.45545077 |
| chr15 | 83867060 | 84126174 | 259115 | 4  | 3 | 3 | 0.18734596 | 0.05670724 | 5 | 5  | 0.18734596 | 0.45545077 |
| chr15 | 84126174 | 84126233 | 60     | 1  | 4 | 5 | 0.30102999 | 0.03070643 | 6 | 4  | 0.11390336 | 0.63695542 |
| chr15 | 84126233 | 84159596 | 33364  | 1  | 4 | 3 | 0.18734596 | 0.03070643 | 4 | 6  | 0.18734596 | 0.63695542 |
| chr15 | 84159596 | 84226780 | 67185  | 2  | 4 | 3 | 0.18734596 | 0.05670724 | 4 | 6  | 0.18734596 | 0.45545077 |
| chr15 | 84226780 | 84256687 | 29908  | 2  | 5 | 3 | 0.30102999 | 0.05670724 | 4 | 5  | 0.11390336 | 0.45545077 |
| chr15 | 84256687 | 84286590 | 29904  | 1  | 4 | 3 | 0.18734596 | 0.05670724 | 4 | 5  | 0.18734596 | 0.45545077 |
| chr15 | 84286590 | 84286636 | 47     | 1  | 4 | 3 | 0.18734596 | 0.03070643 | 4 | 6  | 0.18734596 | 0.63695542 |
| chr15 | 84286636 | 84339106 | 52471  | 1  | 4 | 3 | 0.18734596 | 0.05670724 | 4 | 5  | 0.18734596 | 0.45545077 |
| chr15 | 84339106 | 84390400 | 51295  | 2  | 5 | 3 | 0.30102999 | 0.05670724 | 4 | 5  | 0.11390336 | 0.45545077 |
| chr15 | 84390400 | 84420532 | 30133  | 2  | 5 | 3 | 0.30102999 | 0.03070643 | 4 | 6  | 0.11390336 | 0.63695542 |
| chr15 | 84420532 | 84483276 | 62745  | 2  | 4 | 3 | 0.18734596 | 0.05670724 | 4 | 5  | 0.18734596 | 0.45545077 |
| chr15 | 84483276 | 84483335 | 60     | 1  | 5 | 3 | 0.30102999 | 0.05670724 | 4 | 5  | 0.11390336 | 0.45545077 |
| chr15 | 84483335 | 84689662 | 206328 | 5  | 4 | 4 | 0.18734596 | 0.10122019 | 4 | 4  | 0.18734596 | 0.30102999 |
| chr15 | 84689662 | 84729570 | 39909  | 2  | 4 | 3 | 0.18734596 | 0.05670724 | 4 | 5  | 0.18734596 | 0.45545077 |
| chr15 | 84729570 | 85089979 | 360410 | 2  | 4 | 3 | 0.18734596 | 0.10122019 | 4 | 4  | 0.18734596 | 0.30102999 |
| chr15 | 85089979 | 85152807 | 62829  | 3  | 5 | 3 | 0.30102999 | 0.10122019 | 4 | 4  | 0.11390336 | 0.30102999 |
| chr15 | 85152807 | 85181678 | 28872  | 2  | 5 | 3 | 0.30102999 | 0.17593012 | 4 | 3  | 0.11390336 | 0.17593012 |
| chr15 | 85181678 | 85198471 | 16794  | 3  | 5 | 3 | 0.30102999 | 0.10122019 | 4 | 4  | 0.11390336 | 0.30102999 |
| chr15 | 85198471 | 85257015 | 58545  | 4  | 5 | 3 | 0.30102999 | 0.17593012 | 4 | 3  | 0.11390336 | 0.17593012 |
| chr15 | 85257015 | 85336049 | 79035  | 2  | 5 | 2 | 0.30102999 | 0.08289318 | 3 | 4  | 0.11390336 | 0.30102999 |
| chr15 | 85336049 | 85336108 | 60     | 1  | 5 | 3 | 0.30102999 | 0.10122019 | 4 | 4  | 0.11390336 | 0.30102999 |
| chr15 | 85336108 | 85386706 | 50599  | 1  | 4 | 3 | 0.18734596 | 0.17593012 | 3 | 4  | 0.18734596 | 0.17593    |

|       |          |          |        |    |   |   |            |            |   |   |            |            |
|-------|----------|----------|--------|----|---|---|------------|------------|---|---|------------|------------|
| chr15 | 88424289 | 88474007 | 49719  | 1  | 4 | 2 | 0.30102999 | 0.0429175  | 3 | 4 | 0.10122019 | 0.47744371 |
| chr15 | 88474007 | 88474062 | 56     | 1  | 4 | 2 | 0.30102999 | 0.02162467 | 3 | 5 | 0.10122019 | 0.68214471 |
| chr15 | 88474062 | 88522569 | 48508  | 1  | 4 | 2 | 0.47744371 | 0.02162467 | 2 | 5 | 0.0429175  | 0.68214471 |
| chr15 | 88522569 | 88581413 | 58845  | 2  | 4 | 2 | 0.47744371 | 0.01053319 | 2 | 6 | 0.0429175  | 0.91219088 |
| chr15 | 88581413 | 88628309 | 46897  | 3  | 4 | 2 | 0.30102999 | 0.01053319 | 3 | 6 | 0.10122019 | 0.91219088 |
| chr15 | 88628309 | 88777101 | 148793 | 3  | 4 | 2 | 0.47744371 | 0.01053319 | 2 | 6 | 0.0429175  | 0.91219088 |
| chr15 | 88777101 | 88855561 | 78461  | 3  | 5 | 3 | 0.45545077 | 0.03070643 | 3 | 6 | 0.05670724 | 0.63695542 |
| chr15 | 88855561 | 88855620 | 60     | 1  | 5 | 3 | 0.30102999 | 0.03070643 | 4 | 6 | 0.11390336 | 0.63695542 |
| chr15 | 88855620 | 89018147 | 162528 | 3  | 5 | 3 | 0.45545077 | 0.05670724 | 3 | 5 | 0.05670724 | 0.45545077 |
| chr15 | 89018147 | 89137812 | 119666 | 4  | 4 | 3 | 0.30102999 | 0.05670724 | 3 | 5 | 0.10122019 | 0.45545077 |
| chr15 | 89137812 | 89241955 | 104144 | 7  | 4 | 3 | 0.30102999 | 0.03070643 | 3 | 6 | 0.10122019 | 0.63695542 |
| chr15 | 89241955 | 89375420 | 133466 | 3  | 4 | 3 | 0.18734596 | 0.03070643 | 4 | 6 | 0.18734596 | 0.63695542 |
| chr15 | 89375420 | 89375479 | 60     | 1  | 4 | 3 | 0.18734596 | 0.01598258 | 4 | 7 | 0.18734596 | 0.84395715 |
| chr15 | 89375479 | 89625779 | 250301 | 7  | 4 | 3 | 0.30102999 | 0.01598258 | 3 | 7 | 0.10122019 | 0.84395715 |
| chr15 | 89625779 | 89657063 | 31285  | 2  | 5 | 3 | 0.45545077 | 0.01598258 | 3 | 7 | 0.05670724 | 0.84395715 |
| chr15 | 89657063 | 89722114 | 65052  | 2  | 5 | 3 | 0.45545077 | 0.03070643 | 4 | 6 | 0.05670724 | 0.63695542 |
| chr15 | 89722114 | 89758287 | 36174  | 2  | 5 | 3 | 0.30102999 | 0.03070643 | 4 | 6 | 0.11390336 | 0.63695542 |
| chr15 | 89758287 | 89925993 | 167707 | 6  | 5 | 3 | 0.19510895 | 0.03070643 | 5 | 6 | 0.19510895 | 0.63695542 |
| chr15 | 89925993 | 90089732 | 163740 | 3  | 5 | 3 | 0.30102999 | 0.03070643 | 4 | 6 | 0.11390336 | 0.63695542 |
| chr15 | 90089732 | 90089791 | 60     | 1  | 5 | 3 | 0.19510895 | 0.03070643 | 5 | 6 | 0.19510895 | 0.63695542 |
| chr15 | 90089791 | 90296759 | 186669 | 9  | 4 | 3 | 0.11390336 | 0.03070643 | 5 | 6 | 0.30102999 | 0.63695542 |
| chr15 | 90296759 | 90328199 | 51741  | 1  | 5 | 2 | 0.19510895 | 0.03070643 | 3 | 6 | 0.19510895 | 0.63695542 |
| chr15 | 90328199 | 90377595 | 49397  | 1  | 5 | 2 | 0.19510895 | 0.01053319 | 5 | 5 | 0.19510895 | 0.91219088 |
| chr15 | 90377595 | 90419884 | 42290  | 1  | 5 | 2 | 0.19510895 | 0.02162467 | 5 | 5 | 0.19510895 | 0.68214471 |
| chr15 | 90419884 | 90719940 | 300057 | 7  | 5 | 2 | 0.19510895 | 0.0429175  | 5 | 4 | 0.19510895 | 0.47744371 |
| chr15 | 90719940 | 90951996 | 232057 | 11 | 5 | 3 | 0.19510895 | 0.10122019 | 5 | 4 | 0.19510895 | 0.30102999 |
| chr15 | 90951996 | 91020881 | 68886  | 1  | 5 | 2 | 0.19510895 | 0.0429175  | 5 | 4 | 0.19510895 | 0.47744371 |
| chr15 | 91020881 | 91045753 | 24873  | 2  | 5 | 2 | 0.19510895 | 0.02162467 | 5 | 5 | 0.19510895 | 0.68214471 |
| chr15 | 91045753 | 91084411 | 38659  | 2  | 5 | 2 | 0.19510895 | 0.01053319 | 5 | 6 | 0.19510895 | 0.91219088 |
| chr15 | 91084411 | 91150466 | 66056  | 1  | 5 | 2 | 0.19510895 | 0.02162467 | 5 | 5 | 0.19510895 | 0.68214471 |
| chr15 | 91150466 | 91177726 | 27261  | 1  | 5 | 2 | 0.19510895 | 0.0429175  | 5 | 4 | 0.19510895 | 0.47744371 |
| chr15 | 91177726 | 91326123 | 148398 | 4  | 5 | 2 | 0.12309572 | 0.0429175  | 6 | 4 | 0.30102999 | 0.47744371 |
| chr15 | 91326123 | 91421648 | 95526  | 2  | 5 | 2 | 0.19510895 | 0.0429175  | 5 | 4 | 0.19510895 | 0.47744371 |
| chr15 | 91421648 | 91435678 | 14031  | 2  | 5 | 2 | 0.12309572 | 0.02162467 | 6 | 5 | 0.30102999 | 0.68214471 |
| chr15 | 91435678 | 91510371 | 74694  | 4  | 4 | 2 | 0.06713722 | 0.0429175  | 6 | 4 | 0.44141547 | 0.47744371 |
| chr15 | 91510371 | 91535933 | 25563  | 3  | 5 | 2 | 0.12309572 | 0.02162467 | 6 | 5 | 0.30102999 | 0.68214471 |
| chr15 | 91535933 | 91547976 | 12044  | 1  | 5 | 2 | 0.19510895 | 0.02162467 | 5 | 5 | 0.19510895 | 0.68214471 |
| chr15 | 91547976 | 91548035 | 60     | 1  | 5 | 2 | 0.12309572 | 0.02162467 | 6 | 5 | 0.30102999 | 0.68214471 |
| chr15 | 91548035 | 91705234 | 157200 | 2  | 5 | 2 | 0.12309572 | 0.0429175  | 6 | 4 | 0.30102999 | 0.47744371 |
| chr15 | 91705234 | 91749749 | 44516  | 1  | 4 | 2 | 0.06713722 | 0.0429175  | 6 | 4 | 0.44141547 | 0.47744371 |
| chr15 | 91749749 | 91749808 | 60     | 1  | 4 | 2 | 0.06713722 | 0.02162467 | 6 | 5 | 0.44141547 | 0.68214471 |
| chr15 | 91749808 | 91795596 | 45789  | 1  | 4 | 2 | 0.06713722 | 0.0429175  | 6 | 4 | 0.44141547 | 0.47744371 |
| chr15 | 91795596 | 91879398 | 83803  | 3  | 4 | 2 | 0.03812622 | 0.0429175  | 7 | 4 | 0.60763643 | 0.47744371 |
| chr15 | 91879398 | 92002148 | 122751 | 1  | 4 | 2 | 0.06713722 | 0.0429175  | 6 | 4 | 0.44141547 | 0.47744371 |
| chr15 | 92002148 | 92223821 | 221674 | 3  | 4 | 2 | 0.06713722 | 0.02162467 | 6 | 5 | 0.44141547 | 0.68214471 |
| chr15 | 92223821 | 92397220 | 173400 | 2  | 4 | 2 | 0.18734596 | 0.02162467 | 4 | 5 | 0.18734596 | 0.68214471 |
| chr15 | 92397220 | 92397272 | 53     | 1  | 4 | 2 | 0.11390336 | 0.02162467 | 5 | 5 | 0.30102999 | 0.68214471 |
| chr15 | 92397272 | 92538892 | 141621 | 4  | 4 | 2 | 0.18734596 | 0.0429175  | 4 | 4 | 0.18734596 | 0.47744371 |
| chr15 | 92538892 | 92940670 | 401779 | 9  | 4 | 2 | 0.11390336 | 0.0429175  | 5 | 4 | 0.30102999 | 0.47744371 |
| chr15 | 92940670 | 92981569 | 40900  | 1  | 4 | 2 | 0.11390336 | 0.08289318 | 3 | 3 | 0.30102999 | 0.30102999 |
| chr15 | 92981569 | 92981628 | 60     | 1  | 5 | 2 | 0.19510895 | 0.08289318 | 5 | 3 | 0.19510895 | 0.30102999 |
| chr15 | 92981628 | 93238791 | 257164 | 5  | 4 | 2 | 0.11390336 | 0.08289318 | 3 | 3 | 0.30102999 | 0.30102999 |
| chr15 | 93238791 | 93428335 | 189545 | 3  | 4 | 2 | 0.11390336 | 0.0429175  | 5 | 4 | 0.30102999 | 0.47744371 |
| chr15 | 93428335 | 93492470 | 64136  | 3  | 4 | 2 | 0.06713722 | 0.0429175  | 6 | 4 | 0.44141547 | 0.47744371 |
| chr15 | 93492470 | 93563565 | 71096  | 2  | 4 | 1 | 0.11390336 | 0.02438896 | 5 | 3 | 0.30102999 | 0.51676182 |
| chr15 | 93563565 | 93742005 | 178441 | 4  | 4 | 1 | 0.06713722 | 0.02438896 | 6 | 3 | 0.44141547 | 0.51676182 |
| chr15 | 93742005 | 93900718 | 158714 | 2  | 4 | 0 | 0.06713722 | 0          | 6 | 2 | 0.44141547 | 0.61140001 |
| chr15 | 93900718 | 93960093 | 59376  | 2  | 4 | 1 | 0.06713722 | 0.02438896 | 6 | 3 | 0.44141547 | 0.51676182 |
| chr15 | 93960093 | 94086657 | 126565 | 4  | 4 | 2 | 0.06713722 | 0.08289318 | 6 | 3 | 0.44141547 | 0.30102999 |
| chr15 | 94086657 | 94086716 | 60     | 1  | 4 | 2 | 0.03812622 | 0.08289318 | 7 | 3 | 0.60763643 | 0.30102999 |
| chr15 | 94086716 | 94285748 | 199033 | 2  | 4 | 2 | 0.03070643 | 0.08289318 | 3 | 3 | 0.63695542 | 0.30102999 |
| chr15 | 94285748 | 94447538 | 161791 | 4  | 3 | 2 | 0.01598258 | 0.08289318 | 3 | 3 | 0.84395715 | 0.30102999 |
| chr15 | 94447538 | 9456237  | 128700 | 3  | 2 | 2 | 0.03070643 | 0.08289318 | 6 | 3 | 0.63695542 | 0.30102999 |
| chr15 | 9456237  | 94688578 | 112342 | 2  | 3 | 2 | 0.01598258 | 0.08289318 | 3 | 3 | 0.84395715 | 0.30102999 |
| chr15 | 94688578 | 94798487 | 108910 | 3  | 4 | 2 | 0.03812622 | 0.08289318 | 7 | 3 | 0.60763643 | 0.30102999 |
| chr15 | 94798487 | 94945181 | 146695 | 3  | 4 | 2 | 0.03812622 | 0.08289318 | 7 | 3 | 0.84395715 | 0.30102999 |
| chr15 | 94945181 | 95174602 | 229422 | 5  | 2 | 2 | 0.00493743 | 0.08289318 | 7 | 3 | 1.16581773 | 0.30102999 |
| chr15 | 95174602 | 95435047 | 260446 | 2  | 2 | 2 | 0.01053319 | 0.08289318 | 3 | 3 | 0.91219088 | 0.30102999 |
| chr15 | 95435047 | 95629793 | 194747 | 1  | 4 | 2 | 0.03070643 | 0.08289318 | 6 | 3 | 0.63695542 | 0.30102999 |
| chr15 | 95629793 | 95962045 | 332253 | 5  | 4 | 2 | 0.06713722 | 0.08289318 | 3 | 3 | 0.44141547 | 0.30102999 |
| chr15 | 95962045 | 96110921 | 148877 | 1  | 3 | 2 | 0.03070643 | 0.1575501  | 6 | 2 | 0.63695542 | 0.1575501  |
| chr15 | 96110921 | 96313856 | 202936 | 3  | 2 | 2 | 0.01598258 | 0.1575501  | 7 | 2 | 0.84395715 | 0.1575501  |
| chr15 | 96313856 | 96418284 | 104429 | 2  | 4 | 2 | 0.03812622 | 0.08289318 | 7 | 3 | 0.60763643 | 0.30102999 |
| chr15 | 96418284 | 96503448 | 85165  | 1  | 3 | 2 | 0.01598258 | 0.08289318 | 7 | 3 | 0.84395715 | 0.30102999 |
| chr15 | 96503448 | 96664942 | 161495 | 2  | 3 | 2 | 0.01598258 | 0.1575501  | 7 | 2 | 0.84395715 | 0.1575501  |
| chr15 | 96664942 | 96665001 | 60     | 1  | 2 | 2 | 0.01598258 | 0.0429175  | 7 | 4 | 0.84395715 | 0.47744371 |
| chr15 | 96665001 | 96863554 | 198554 | 2  | 2 | 2 | 0.00493743 | 0.0429175  | 7 | 4 | 1.16581773 | 0.47744371 |
| chr15 | 96863554 | 96863613 | 60     | 1  | 3 | 2 | 0.01598258 | 0.0429175  | 7 | 4 | 0.84395715 | 0.47744371 |
| chr15 | 96863613 | 96896823 | 33211  | 3  | 2 | 2 | 0.01598258 | 0.08289318 | 7 | 3 | 0.84395715 | 0.30102999 |
| chr15 | 96896823 | 97048169 | 151347 | 3  | 4 | 2 | 0.03812622 | 0.08289318 | 7 | 3 | 0.60763643 | 0.30102999 |
| chr15 | 97048169 | 97048228 | 60     | 1  | 4 | 2 | 0.03812622 | 0.02162467 | 7 | 5 | 0.60763643 | 0.68214471 |
| chr15 | 97048228 | 97327888 | 279661 | 4  | 4 | 2 | 0.03812622 | 0.0429175  | 7 | 4 | 0.60763643 | 0.47744371 |
| chr15 | 97327888 | 97557295 | 229408 | 3  | 4 | 2 | 0.03812622 | 0.02162467 | 7 | 5 | 0.60763643 | 0.68214471 |
| chr15 | 97557295 | 97867352 | 310058 | 7  | 4 | 3 | 0.03812622 | 0.05670724 | 7 | 5 | 0.60763643 | 0.45545077 |
| chr15 | 97867352 | 98033676 | 166325 | 3  | 4 | 3 | 0.03070643 | 0.10122019 | 6 | 4 | 0.63695542 | 0.30102999 |
| chr15 | 98033676 | 98097360 | 63685  | 2  | 4 | 3 | 0.03812622 | 0.05670724 | 7 | 5 | 0.60763643 | 0.45545077 |
| chr15 | 98097360 | 98225002 | 127643 | 2  | 4 | 3 | 0.03812622 | 0.10122019 | 7 | 4 | 0.60763643 | 0.30102999 |
| chr15 | 98225002 | 98278660 | 53659  | 1  | 3 | 3 | 0.01598258 | 0.10122019 | 7 | 4 | 0.84395715 | 0.30102999 |
| chr15 | 98278660 | 98327117 | 48458  | 1  | 3 | 3 | 0.01598258 | 0.05670724 | 7 | 5 | 0.84395715 | 0.45545077 |
| chr1  |          |          |        |    |   |   |            |            |   |   |            |            |

|       |           |           |        |    |    |   |            |              |   |   |            |            |
|-------|-----------|-----------|--------|----|----|---|------------|--------------|---|---|------------|------------|
| chr15 | 102093084 | 102241406 | 148323 | 4  | 3  | 1 | 0.01598258 | 0.1218695    | 7 | 1 | 0.84395715 | 0.1218695  |
| chr15 | 102241406 | 102383473 | 142068 | 5  | 2  | 1 | 0.00493743 | 0.1218695    | 7 | 1 | 1.16581773 | 0.1218695  |
| chr15 | 102383473 | 102465355 | 81883  | 1  | 2  | 0 | 0.01053139 | 0            | 6 | 1 | 0.91219088 | 0.30102999 |
| chr16 | 106271    | 154314    | 48044  | 2  | 1  | 1 | 0.05404976 | 0.05404976   | 2 | 2 | 0.30102999 | 0.30102999 |
| chr16 | 154314    | 154373    | 60     | 1  | 3  | 1 | 0.10122019 | 0.02438896   | 4 | 3 | 0.30102999 | 0.51676182 |
| chr16 | 154373    | 271734    | 117362 | 2  | 1  | 1 | 0.1218695  | 0.02438896   | 1 | 1 | 0.1218695  | 0.51676182 |
| chr16 | 271734    | 333753    | 62020  | 2  | 2  | 1 | 0.30102999 | 0.02438896   | 1 | 3 | 0.05404976 | 0.51676182 |
| chr16 | 333753    | 433219    | 99467  | 3  | 3  | 2 | 0.30102999 | 0.0429175    | 2 | 4 | 0.08289318 | 0.47744371 |
| chr16 | 433219    | 497766    | 64548  | 2  | 5  | 2 | 0.45545077 | 0.0429175    | 3 | 4 | 0.05670724 | 0.47744371 |
| chr16 | 497766    | 571779    | 74014  | 2  | 7  | 2 | 0.43181735 | 0.02162467   | 5 | 5 | 0.07511598 | 0.68214471 |
| chr16 | 571779    | 571827    | 49     | 1  | 9  | 2 | 0.5732208  | 0.02162467   | 6 | 5 | 0.04875589 | 0.68214471 |
| chr16 | 571827    | 673336    | 101510 | 2  | 5  | 2 | 0.30102999 | 0.02162467   | 4 | 5 | 0.11390336 | 0.68214471 |
| chr16 | 673336    | 1100695   | 427360 | 9  | 4  | 2 | 0.18734596 | 0.02162467   | 4 | 5 | 0.18734596 | 0.68214471 |
| chr16 | 1100695   | 1100754   | 60     | 1  | 7  | 2 | 0.43181735 | 0.02162467   | 5 | 5 | 0.07511598 | 0.68214471 |
| chr16 | 1100754   | 1125095   | 24342  | 1  | 7  | 2 | 0.60763643 | 0.02162467   | 4 | 5 | 0.03812622 | 0.68214471 |
| chr16 | 1125095   | 1206922   | 81828  | 3  | 8  | 2 | 0.79906872 | 0.02162467   | 4 | 5 | 0.02074938 | 0.68214471 |
| chr16 | 1206922   | 1297136   | 90215  | 4  | 9  | 2 | 1.01542894 | 0.02162467   | 4 | 5 | 0.01077081 | 0.68214471 |
| chr16 | 1297136   | 1297182   | 47     | 1  | 10 | 2 | 0.97390707 | 0.02162467   | 5 | 5 | 0.01320236 | 0.68214471 |
| chr16 | 1297182   | 1453652   | 156471 | 8  | 7  | 2 | 0.60763643 | 0.02162467   | 4 | 5 | 0.03812622 | 0.68214471 |
| chr16 | 1453652   | 1453710   | 59     | 1  | 7  | 3 | 0.60763643 | 0.05670724   | 4 | 5 | 0.03812622 | 0.45545077 |
| chr16 | 1453710   | 1574104   | 120395 | 3  | 6  | 3 | 0.44141547 | 0.10122019   | 4 | 4 | 0.06713722 | 0.30102999 |
| chr16 | 1574104   | 1637301   | 63198  | 4  | 7  | 3 | 0.60763643 | 0.10122019   | 4 | 4 | 0.03812622 | 0.30102999 |
| chr16 | 1637301   | 1759999   | 122899 | 5  | 4  | 3 | 0.18734596 | 0.10122019   | 4 | 4 | 0.18734596 | 0.30102999 |
| chr16 | 1759999   | 1760058   | 60     | 1  | 5  | 3 | 0.30102999 | 0.10122019   | 4 | 4 | 0.11390336 | 0.30102999 |
| chr16 | 1760058   | 1820324   | 60267  | 2  | 4  | 3 | 0.18734596 | 0.10122019   | 4 | 4 | 0.18734596 | 0.30102999 |
| chr16 | 1820324   | 1822173   | 1850   | 2  | 3  | 3 | 0.30102999 | 0.10122019   | 4 | 4 | 0.11390336 | 0.30102999 |
| chr16 | 1822173   | 1876022   | 53850  | 3  | 4  | 3 | 0.18734596 | 0.10122019   | 4 | 4 | 0.18734596 | 0.30102999 |
| chr16 | 1876022   | 1884173   | 8152   | 3  | 5  | 2 | 0.30102999 | 0.10122019   | 4 | 4 | 0.11390336 | 0.30102999 |
| chr16 | 1884173   | 1940455   | 56283  | 2  | 3  | 3 | 0.10122019 | 0.10122019   | 4 | 4 | 0.30102999 | 0.30102999 |
| chr16 | 1940455   | 1940514   | 60     | 1  | 4  | 3 | 0.18734596 | 0.10122019   | 4 | 4 | 0.18734596 | 0.30102999 |
| chr16 | 1940514   | 2034897   | 94384  | 6  | 3  | 3 | 0.10122019 | 0.10122019   | 4 | 4 | 0.30102999 | 0.30102999 |
| chr16 | 2034897   | 2100490   | 65594  | 7  | 3  | 3 | 0.18734596 | 0.05670724   | 4 | 5 | 0.18734596 | 0.45545077 |
| chr16 | 2100490   | 2127417   | 26928  | 2  | 3  | 3 | 0.10122019 | 0.10122019   | 4 | 4 | 0.30102999 | 0.30102999 |
| chr16 | 2127417   | 2145917   | 18501  | 1  | 3  | 3 | 0.10122019 | 0.17593012   | 4 | 3 | 0.30102999 | 0.17593012 |
| chr16 | 2145917   | 2200574   | 54658  | 2  | 4  | 3 | 0.18734596 | 0.17593012   | 4 | 3 | 0.18734596 | 0.17593012 |
| chr16 | 2200574   | 2280210   | 79637  | 2  | 3  | 3 | 0.10122019 | 0.17593012   | 4 | 3 | 0.30102999 | 0.17593012 |
| chr16 | 2280210   | 2300703   | 20494  | 3  | 4  | 3 | 0.18734596 | 0.17593012   | 4 | 3 | 0.18734596 | 0.17593012 |
| chr16 | 2300703   | 2307401   | 6699   | 2  | 5  | 3 | 0.30102999 | 0.17593012   | 4 | 3 | 0.11390336 | 0.17593012 |
| chr16 | 2307401   | 2365425   | 58025  | 2  | 4  | 3 | 0.18734596 | 0.17593012   | 4 | 3 | 0.18734596 | 0.17593012 |
| chr16 | 2365425   | 2481165   | 115741 | 2  | 4  | 3 | 0.30102999 | 0.17593012   | 3 | 3 | 0.10122019 | 0.17593012 |
| chr16 | 2481165   | 2513791   | 32627  | 3  | 3  | 3 | 0.17593012 | 0.17593012   | 3 | 3 | 0.17593012 | 0.17593012 |
| chr16 | 2513791   | 2544864   | 31074  | 3  | 3  | 3 | 0.30102999 | 0.17593012   | 3 | 3 | 0.10122019 | 0.17593012 |
| chr16 | 2544864   | 2573957   | 29094  | 2  | 3  | 3 | 0.17593012 | 0.17593012   | 3 | 3 | 0.17593012 | 0.17593012 |
| chr16 | 2573957   | 2698642   | 124686 | 4  | 4  | 3 | 0.30102999 | 0.17593012   | 3 | 3 | 0.10122019 | 0.17593012 |
| chr16 | 2698642   | 2767953   | 69312  | 3  | 4  | 3 | 0.18734596 | 0.17593012   | 4 | 3 | 0.18734596 | 0.17593012 |
| chr16 | 2767953   | 2768009   | 57     | 1  | 5  | 3 | 0.30102999 | 0.17593012   | 3 | 3 | 0.11390336 | 0.17593012 |
| chr16 | 2768009   | 2823440   | 55432  | 3  | 4  | 3 | 0.30102999 | 0.17593012   | 3 | 3 | 0.10122019 | 0.17593012 |
| chr16 | 2823440   | 2823495   | 56     | 1  | 5  | 3 | 0.45545077 | 0.17593012   | 3 | 3 | 0.05670724 | 0.17593012 |
| chr16 | 2823495   | 2869281   | 45787  | 1  | 4  | 3 | 0.30102999 | 0.30102999   | 3 | 2 | 0.10122019 | 0.08289318 |
| chr16 | 2869281   | 2904800   | 35520  | 2  | 4  | 3 | 0.17593012 | 0.30102999   | 3 | 2 | 0.17593012 | 0.08289318 |
| chr16 | 2904800   | 2998860   | 94061  | 5  | 4  | 3 | 0.30102999 | 0.30102999   | 3 | 2 | 0.10122019 | 0.08289318 |
| chr16 | 2998860   | 3020694   | 21835  | 2  | 3  | 3 | 0.17593012 | 0.30102999   | 3 | 2 | 0.17593012 | 0.08289318 |
| chr16 | 3020694   | 3066219   | 45526  | 3  | 2  | 3 | 0.1575501  | 0.30102999   | 2 | 2 | 0.1575501  | 0.08289318 |
| chr16 | 3066219   | 3076495   | 10277  | 3  | 3  | 3 | 0.30102999 | 0.30102999   | 2 | 2 | 0.08289318 | 0.08289318 |
| chr16 | 3076495   | 3100528   | 24034  | 1  | 2  | 2 | 0.1575501  | 0.30102999   | 2 | 2 | 0.1575501  | 0.08289318 |
| chr16 | 3100528   | 3117552   | 17025  | 2  | 4  | 2 | 0.1575501  | 0.47744371   | 2 | 2 | 0.1575501  | 0.0429175  |
| chr16 | 3117552   | 3117609   | 58     | 1  | 2  | 4 | 0.08289318 | 0.47744371   | 3 | 2 | 0.30102999 | 0.0429175  |
| chr16 | 3117609   | 3296579   | 178971 | 6  | 2  | 3 | 0.08289318 | 0.30102999   | 3 | 2 | 0.30102999 | 0.08289318 |
| chr16 | 3296579   | 3339626   | 43048  | 1  | 2  | 3 | 0.30102999 | 0.30102999   | 1 | 2 | 0.05404976 | 0.08289318 |
| chr16 | 3339626   | 3406011   | 66386  | 4  | 2  | 3 | 0.1575501  | 0.30102999   | 2 | 2 | 0.1575501  | 0.08289318 |
| chr16 | 3406011   | 3487263   | 81253  | 6  | 3  | 3 | 0.30102999 | 0.30102999   | 2 | 2 | 0.08289318 | 0.08289318 |
| chr16 | 3487263   | 3536906   | 49644  | 3  | 4  | 3 | 0.47744371 | 0.30102999   | 2 | 2 | 0.0429175  | 0.08289318 |
| chr16 | 3536906   | 4013225   | 476320 | 15 | 5  | 3 | 0.30102999 | 0.30102999   | 4 | 3 | 0.11390336 | 0.08289318 |
| chr16 | 4013225   | 4091021   | 77797  | 1  | 5  | 3 | 0.45545077 | 0.30102999   | 3 | 2 | 0.05670724 | 0.08289318 |
| chr16 | 4091021   | 4264335   | 173315 | 5  | 5  | 3 | 0.45545077 | 0.51676182   | 3 | 2 | 0.05670724 | 0.02438896 |
| chr16 | 4264335   | 4286108   | 21774  | 2  | 6  | 3 | 0.63695542 | 0.51676182   | 1 | 0 | 0.03070643 | 0.02438896 |
| chr16 | 4286108   | 4480158   | 154051 | 7  | 7  | 3 | 0.84395715 | 0.51676182   | 3 | 3 | 0.01589258 | 0.02438896 |
| chr16 | 4480158   | 4579701   | 99544  | 7  | 7  | 3 | 0.60763643 | 0.51676182   | 4 | 4 | 0.03812622 | 0.02438896 |
| chr16 | 4579701   | 4853843   | 274143 | 12 | 6  | 3 | 0.63695542 | 0.51676182   | 3 | 1 | 0.03070643 | 0.02438896 |
| chr16 | 4853843   | 4964631   | 110789 | 3  | 6  | 2 | 0.63695542 | 0.30102999   | 3 | 1 | 0.03070643 | 0.05404976 |
| chr16 | 4964631   | 5061608   | 96578  | 3  | 6  | 3 | 0.63695542 | 0.51676182   | 3 | 1 | 0.03070643 | 0.02438896 |
| chr16 | 5061608   | 5115497   | 53890  | 3  | 6  | 4 | 0.63695542 | 0.76005302   | 3 | 1 | 0.03070643 | 0.01091641 |
| chr16 | 5115497   | 5198159   | 82663  | 1  | 6  | 2 | 0.63695542 | 0.30102999   | 3 | 1 | 0.03070643 | 0.05404976 |
| chr16 | 5198159   | 5385307   | 187149 | 2  | 5  | 2 | 0.45545077 | 0.30102999   | 3 | 1 | 0.05670724 | 0.05404976 |
| chr16 | 5385307   | 5478322   | 93016  | 1  | 4  | 2 | 0.30102999 | 0.30102999   | 3 | 1 | 0.10122019 | 0.05404976 |
| chr16 | 5478322   | 5478381   | 60     | 1  | 4  | 3 | 0.30102999 | 0.51676182   | 3 | 1 | 0.10122019 | 0.02438896 |
| chr16 | 5478381   | 5526935   | 48555  | 1  | 4  | 1 | 0.47744371 | 0.1218695    | 2 | 1 | 0.0429175  | 0.1218695  |
| chr16 | 5526935   | 5625716   | 98782  | 1  | 2  | 1 | 0.1575501  | 0.1218695    | 2 | 1 | 0.1575501  | 0.1218695  |
| chr16 | 5625716   | 5791665   | 165950 | 2  | 2  | 1 | 0.1575501  | 0.30102999   | 2 | 1 | 0.1575501  | 0.05404976 |
| chr16 | 5791665   | 5916887   | 125223 | 2  | 2  | 3 | 0.1575501  | 0.51676182   | 2 | 1 | 0.1575501  | 0.02438896 |
| chr16 | 5916887   | 5961336   | 44450  | 2  | 2  | 3 | 0.1575501  | 0.30102999   | 2 | 2 | 0.1575501  | 0.08289318 |
| chr16 | 5961336   | 6109798   | 148463 | 2  | 2  | 2 | 0.1575501  | 0.1575501    | 2 | 2 | 0.1575501  | 0.1575501  |
| chr16 | 6109798   | 6149386   | 39589  | 2  | 2  | 3 | 0.1575501  | 0.30102999   | 2 | 2 | 0.1575501  | 0.08289318 |
| chr16 | 6149386   | 6266578   | 117193 | 2  | 1  | 3 | 0.05404976 | 0.51676182   | 2 | 1 | 0.30102999 | 0.02438896 |
| chr16 | 6266578   | 6466831   | 200254 | 7  | 2  | 3 | 0.1575501  | 0.51676182   | 2 | 1 | 0.1575501  | 0.02438896 |
| chr16 | 6466831   | 6466890   | 60     | 1  | 3  | 3 | 0.30102999 | 0.30102999   | 2 | 2 | 0.08289318 | 0.08289318 |
| chr16 | 6466890   | 6520292   | 53403  | 1  | 2  | 3 | 0.1575501  | 0.30102999   | 2 | 2 | 0.1575501  | 0.08289318 |
| chr16 | 6520292   | 6628137   | 107846 | 2  | 2  | 3 | 0.1575501  | 0.51676182   | 2 | 1 | 0.1575501  | 0.02438896 |
| chr16 | 6628137   | 6920971   | 292835 | 8  | 3  | 3 | 0.30102999 | 0.30102999   | 2 | 2 | 0.08289318 | 0.08289318 |
| chr16 | 6920971   | 7126816   | 205846 | 4  | 2  | 3 | 0.1575501  | 0.30102999   | 2 | 2 | 0.1575501  | 0.08289318 |
| chr16 | 7126816   | 7308768   | 181953 | 3  | 2  | 3 | 0.1575501  | 0.51676182</ |   |   |            |            |

|       |          |          |        |    |   |   |            |            |   |   |            |            |
|-------|----------|----------|--------|----|---|---|------------|------------|---|---|------------|------------|
| chr16 | 11035058 | 1141132  | 106075 | 2  | 2 | 3 | 0.08289318 | 0.30102999 | 3 | 2 | 0.30102999 | 0.08289318 |
| chr16 | 11141132 | 1141191  | 60     | 1  | 2 | 3 | 0.02162467 | 0.30102999 | 5 | 2 | 0.68214471 | 0.08289318 |
| chr16 | 11141191 | 11287050 | 145860 | 4  | 2 | 3 | 0.0429175  | 0.30102999 | 4 | 2 | 0.47744371 | 0.08289318 |
| chr16 | 11287050 | 11441572 | 154523 | 5  | 2 | 3 | 0.08289318 | 0.30102999 | 3 | 2 | 0.30102999 | 0.08289318 |
| chr16 | 11441572 | 11458544 | 16973  | 2  | 2 | 3 | 0.0429175  | 0.30102999 | 4 | 2 | 0.47744371 | 0.08289318 |
| chr16 | 11458544 | 11785157 | 326614 | 7  | 2 | 3 | 0.08289318 | 0.30102999 | 3 | 2 | 0.30102999 | 0.08289318 |
| chr16 | 11785157 | 11799532 | 14376  | 2  | 2 | 3 | 0.08289318 | 0.17593012 | 3 | 3 | 0.30102999 | 0.17593012 |
| chr16 | 11799532 | 11938929 | 139398 | 5  | 2 | 3 | 0.08289318 | 0.30102999 | 3 | 2 | 0.30102999 | 0.08289318 |
| chr16 | 11938929 | 12008210 | 69282  | 4  | 2 | 3 | 0.0429175  | 0.30102999 | 4 | 2 | 0.47744371 | 0.08289318 |
| chr16 | 12008210 | 12380174 | 371965 | 9  | 2 | 3 | 0.1575501  | 0.51676182 | 2 | 1 | 0.1575501  | 0.02438896 |
| chr16 | 12380174 | 12437027 | 56854  | 1  | 2 | 2 | 0.1575501  | 0.30102999 | 2 | 1 | 0.1575501  | 0.05404976 |
| chr16 | 12437027 | 12437086 | 60     | 1  | 3 | 2 | 0.30102999 | 0.30102999 | 2 | 1 | 0.08289318 | 0.05404976 |
| chr16 | 12437086 | 12571576 | 134491 | 3  | 2 | 2 | 0.1575501  | 0.30102999 | 2 | 1 | 0.1575501  | 0.05404976 |
| chr16 | 12571576 | 12610560 | 38985  | 2  | 2 | 2 | 0.1575501  | 0.1575501  | 2 | 2 | 0.1575501  | 0.1575501  |
| chr16 | 12610560 | 12663730 | 53171  | 1  | 2 | 2 | 0.1575501  | 0.30102999 | 2 | 1 | 0.1575501  | 0.05404976 |
| chr16 | 12663730 | 12831780 | 168051 | 3  | 2 | 2 | 0.1575501  | 0.61140001 | 2 | 0 | 0.1575501  | 0          |
| chr16 | 12831780 | 12875277 | 43498  | 2  | 2 | 2 | 0.30102999 | 0.61140001 | 2 | 0 | 0.08289318 | 0          |
| chr16 | 12875277 | 13030131 | 154855 | 2  | 3 | 1 | 0.30102999 | 0.30102999 | 2 | 0 | 0.08289318 | 0          |
| chr16 | 13030131 | 13030190 | 60     | 1  | 3 | 1 | 0.05670724 | 0.30102999 | 1 | 5 | 0.45545077 | 0          |
| chr16 | 13030190 | 13110654 | 80465  | 3  | 1 | 1 | 0.10122019 | 0.30102999 | 1 | 4 | 0.30102999 | 0          |
| chr16 | 13110654 | 13256366 | 145713 | 2  | 3 | 1 | 0.30102999 | 0.30102999 | 2 | 0 | 0.08289318 | 0          |
| chr16 | 13256366 | 13547819 | 291454 | 4  | 3 | 1 | 0.17593012 | 0.30102999 | 3 | 0 | 0.17593012 | 0          |
| chr16 | 13547819 | 13722409 | 174591 | 2  | 3 | 1 | 0.05670724 | 0.30102999 | 2 | 5 | 0.45545077 | 0          |
| chr16 | 13722409 | 14031596 | 309188 | 4  | 3 | 0 | 0.10122019 | 0          | 0 | 0 | 0.30102999 | 0          |
| chr16 | 14031596 | 14145698 | 114103 | 4  | 3 | 0 | 0.05670724 | 0          | 0 | 0 | 0.45545077 | 0          |
| chr16 | 14145698 | 14145757 | 60     | 1  | 0 | 0 | 0.03070643 | 0          | 0 | 6 | 0.63695542 | 0          |
| chr16 | 14145757 | 14205407 | 59651  | 1  | 3 | 0 | 0.05670724 | 0          | 0 | 5 | 0.45545077 | 0          |
| chr16 | 14205407 | 14383105 | 177699 | 3  | 0 | 0 | 0.10122019 | 0          | 0 | 4 | 0.30102999 | 0          |
| chr16 | 14383105 | 14545934 | 162830 | 4  | 3 | 0 | 0.05670724 | 0          | 0 | 0 | 0.45545077 | 0          |
| chr16 | 14545934 | 14545993 | 60     | 1  | 4 | 0 | 0.06713722 | 0          | 0 | 6 | 0.44141547 | 0          |
| chr16 | 14545993 | 14564188 | 18196  | 1  | 4 | 0 | 0.11390336 | 0          | 0 | 5 | 0.30102999 | 0          |
| chr16 | 14564188 | 14594848 | 30661  | 1  | 4 | 0 | 0.18734596 | 0          | 0 | 4 | 0.18734596 | 0          |
| chr16 | 14594848 | 14649516 | 54669  | 2  | 4 | 0 | 0.11390336 | 0          | 0 | 5 | 0.30102999 | 0          |
| chr16 | 14649516 | 14649572 | 57     | 1  | 4 | 0 | 0.06713722 | 0          | 0 | 6 | 0.44141547 | 0          |
| chr16 | 14649572 | 14680170 | 30599  | 1  | 3 | 0 | 0.03070643 | 0          | 0 | 6 | 0.63695542 | 0          |
| chr16 | 14680170 | 14742266 | 62097  | 2  | 4 | 0 | 0.06713722 | 0          | 0 | 6 | 0.44141547 | 0          |
| chr16 | 14742266 | 14742325 | 60     | 1  | 5 | 0 | 0.12309572 | 0          | 0 | 6 | 0.30102999 | 0          |
| chr16 | 14742325 | 14780194 | 37870  | 3  | 4 | 0 | 0.06713722 | 0          | 0 | 6 | 0.44141547 | 0          |
| chr16 | 14780194 | 15048751 | 268558 | 1  | 3 | 0 | 0.05670724 | 0          | 0 | 5 | 0.45545077 | 0          |
| chr16 | 15048751 | 15131723 | 82973  | 2  | 4 | 0 | 0.11390336 | 0.30102999 | 5 | 1 | 0.30102999 | 0.05404976 |
| chr16 | 15131723 | 15534187 | 402465 | 6  | 5 | 2 | 0.12309572 | 0.30102999 | 6 | 1 | 0.30102999 | 0.05404976 |
| chr16 | 15534187 | 15741010 | 206824 | 9  | 5 | 2 | 0.19510895 | 0.30102999 | 5 | 1 | 0.19510895 | 0.05404976 |
| chr16 | 15741010 | 15754022 | 13013  | 1  | 5 | 2 | 0.30102999 | 0.30102999 | 4 | 1 | 0.11390336 | 0.05404976 |
| chr16 | 15754022 | 15929435 | 175414 | 6  | 5 | 2 | 0.45545077 | 0.30102999 | 3 | 1 | 0.05670724 | 0.05404976 |
| chr16 | 15929435 | 16098195 | 168761 | 6  | 5 | 2 | 0.30102999 | 0.30102999 | 4 | 1 | 0.11390336 | 0.05404976 |
| chr16 | 16098195 | 16181005 | 82811  | 2  | 5 | 2 | 0.68214471 | 0.30102999 | 2 | 1 | 0.02162467 | 0.05404976 |
| chr16 | 16181005 | 16276115 | 95111  | 3  | 4 | 2 | 0.47744371 | 0.30102999 | 2 | 1 | 0.0429175  | 0.05404976 |
| chr16 | 16276115 | 16899617 | 623503 | 1  | 2 | 1 | 0.30102999 | 0.1218695  | 1 | 1 | 0.05404976 | 0.1218695  |
| chr16 | 16899617 | 16899676 | 60     | 1  | 2 | 2 | 0.30102999 | 0.30102999 | 1 | 1 | 0.05404976 | 0.05404976 |
| chr16 | 16899676 | 17134564 | 234889 | 2  | 1 | 1 | 0.1218695  | 0.30102999 | 1 | 0 | 0.1218695  | 0          |
| chr16 | 17134564 | 17134623 | 60     | 1  | 1 | 1 | 0.1218695  | 0.05404976 | 1 | 2 | 0.1218695  | 0.30102999 |
| chr16 | 17134623 | 17250131 | 115509 | 2  | 1 | 1 | 0.1218695  | 0.30102999 | 1 | 0 | 0.1218695  | 0          |
| chr16 | 17250131 | 17250190 | 60     | 1  | 1 | 2 | 0.1218695  | 0.61140001 | 1 | 0 | 0.1218695  | 0          |
| chr16 | 17250190 | 17804307 | 554118 | 9  | 0 | 0 | 0          | 0.61140001 | 0 | 0 | 0          | 0          |
| chr16 | 17804307 | 17804366 | 60     | 1  | 1 | 2 | 0.1218695  | 0.30102999 | 1 | 1 | 0.1218695  | 0.05404976 |
| chr16 | 17804366 | 17917642 | 113277 | 1  | 0 | 2 | 0          | 0.30102999 | 1 | 1 | 0.30102999 | 0.05404976 |
| chr16 | 17917642 | 18112776 | 195135 | 3  | 1 | 1 | 0.1218695  | 0.1575501  | 1 | 2 | 0.1218695  | 0.1575501  |
| chr16 | 18112776 | 18794446 | 681671 | 1  | 1 | 1 | 0.1218695  | 0.1218695  | 1 | 1 | 0.1218695  | 0.1218695  |
| chr16 | 18794446 | 18844372 | 49927  | 4  | 2 | 2 | 0.1575501  | 0.30102999 | 2 | 1 | 0.1575501  | 0.05404976 |
| chr16 | 18844372 | 19161369 | 316998 | 7  | 2 | 2 | 0.1575501  | 0.1575501  | 2 | 2 | 0.1575501  | 0.1575501  |
| chr16 | 19161369 | 19299290 | 137922 | 4  | 2 | 2 | 0.08289318 | 0.1575501  | 3 | 2 | 0.30102999 | 0.1575501  |
| chr16 | 19299290 | 19361550 | 62261  | 2  | 3 | 2 | 0.1575501  | 0.1575501  | 2 | 2 | 0.1575501  | 0.1575501  |
| chr16 | 19361550 | 19424115 | 62566  | 2  | 3 | 2 | 0.1575501  | 0.17593012 | 3 | 3 | 0.1575501  | 0.17593012 |
| chr16 | 19424115 | 19562650 | 138536 | 7  | 2 | 3 | 0.08289318 | 0.17593012 | 3 | 3 | 0.30102999 | 0.17593012 |
| chr16 | 19562650 | 19639932 | 77283  | 2  | 2 | 2 | 0.1575501  | 0.08289318 | 2 | 3 | 0.1575501  | 0.30102999 |
| chr16 | 19639932 | 19639991 | 60     | 1  | 2 | 2 | 0.08289318 | 0.08289318 | 3 | 0 | 0.30102999 | 0.30102999 |
| chr16 | 19639991 | 19690359 | 50369  | 2  | 2 | 2 | 0.1575501  | 0.08289318 | 2 | 3 | 0.1575501  | 0.30102999 |
| chr16 | 19690359 | 19838424 | 148066 | 5  | 2 | 2 | 0.08289318 | 0.08289318 | 3 | 3 | 0.30102999 | 0.30102999 |
| chr16 | 19838424 | 19838478 | 55     | 1  | 3 | 2 | 0.08289318 | 0.0429175  | 3 | 4 | 0.30102999 | 0.47744371 |
| chr16 | 19838478 | 19903390 | 64913  | 3  | 2 | 2 | 0.08289318 | 0.08289318 | 3 | 3 | 0.30102999 | 0.30102999 |
| chr16 | 19903390 | 19903449 | 60     | 1  | 3 | 2 | 0.17593012 | 0.0429175  | 3 | 4 | 0.17593012 | 0.47744371 |
| chr16 | 19903449 | 20116312 | 212864 | 3  | 3 | 2 | 0.17593012 | 0.08289318 | 3 | 3 | 0.17593012 | 0.30102999 |
| chr16 | 20116312 | 20300957 | 184646 | 2  | 3 | 2 | 0.17593012 | 0.0429175  | 3 | 3 | 0.17593012 | 0.47744371 |
| chr16 | 20300957 | 20430049 | 129093 | 10 | 4 | 2 | 0.30102999 | 0.0429175  | 4 | 4 | 0.10122019 | 0.47744371 |
| chr16 | 20430049 | 20563936 | 133888 | 3  | 4 | 3 | 0.30102999 | 0.10122019 | 3 | 4 | 0.10122019 | 0.30102999 |
| chr16 | 20563936 | 20611464 | 47529  | 4  | 4 | 4 | 0.30102999 | 0.18734596 | 3 | 4 | 0.10122019 | 0.18734596 |
| chr16 | 20611464 | 20673134 | 61671  | 2  | 3 | 3 | 0.17593012 | 0.10122019 | 3 | 4 | 0.17593012 | 0.30102999 |
| chr16 | 20673134 | 20673193 | 60     | 1  | 4 | 3 | 0.30102999 | 0.10122019 | 4 | 4 | 0.10122019 | 0.30102999 |
| chr16 | 20673193 | 20750192 | 77000  | 2  | 3 | 3 | 0.17593012 | 0.10122019 | 3 | 4 | 0.17593012 | 0.30102999 |
| chr16 | 20750192 | 20819612 | 69421  | 6  | 4 | 3 | 0.30102999 | 0.10122019 | 3 | 4 | 0.10122019 | 0.30102999 |
| chr16 | 20819612 | 20861010 | 41399  | 2  | 3 | 3 | 0.17593012 | 0.10122019 | 3 | 4 | 0.17593012 | 0.30102999 |
| chr16 | 20861010 | 21172562 | 311553 | 10 | 2 | 3 | 0.08289318 | 0.10122019 | 3 | 4 | 0.30102999 | 0.30102999 |
| chr16 | 21172562 | 21285019 | 112458 | 7  | 3 | 3 | 0.10122019 | 0.10122019 | 4 | 4 | 0.30102999 | 0.30102999 |
| chr16 | 21285019 | 21285078 | 60     | 1  | 4 | 3 | 0.18734596 | 0.10122019 | 4 | 4 | 0.18734596 | 0.30102999 |
| chr16 | 21285078 | 21328596 | 43519  | 2  | 3 | 3 | 0.10122019 | 0.10122019 | 4 | 4 | 0.30102999 | 0.30102999 |
| chr16 | 21328596 | 21574908 | 246313 | 3  | 2 | 2 | 0.10122019 | 0.0429175  | 4 | 4 | 0.30102999 | 0.47744371 |
| chr16 | 21574908 | 21599746 | 24839  | 2  | 3 | 2 | 0.05670724 | 0.0429175  | 5 | 4 | 0.45545077 | 0.47744371 |
| chr16 | 21599746 | 21649746 | 50001  | 2  | 3 | 2 | 0.10122019 | 0.08289318 | 4 | 3 | 0.30102999 | 0.30102999 |
| chr16 | 21649746 | 21677954 | 28209  | 3  | 3 | 3 | 0.05670724 | 0.17593012 | 5 | 3 | 0.45545077 | 0.17593012 |
| chr16 | 21677954 | 21739826 | 61873  | 2  | 2 | 2 | 0.02162467 | 0.08289318 | 5 | 3 | 0.68214471 | 0.30102999 |
| chr16 | 21739826 | 21739885 | 60     | 1  | 2 | 3 | 0.02162467 | 0.17593012 | 5 | 3 | 0.68214471 | 0.17593012 |
| chr16 | 21739885 | 21951379 | 211495 | 1  | 3 | 2 | 0.02162467 | 0.08289318 | 5 | 3 | 0.68214471 | 0.30102999 |
| chr16 | 21951379 | 21973816 | 22438  | 2  |   |   |            |            |   |   |            |            |



|       |          |          |        |    |   |   |            |            |   |   |            |            |
|-------|----------|----------|--------|----|---|---|------------|------------|---|---|------------|------------|
| chr16 | 24150661 | 24150720 | 60     | 1  | 5 | 2 | 0.30102999 | 0.0429175  | 4 | 4 | 0.11390336 | 0.47744371 |
| chr16 | 24150720 | 24406788 | 256069 | 6  | 5 | 2 | 0.30102999 | 0.08289318 | 4 | 3 | 0.11390336 | 0.30102999 |
| chr16 | 24406788 | 24406847 | 60     | 1  | 5 | 2 | 0.30102999 | 0.0429175  | 4 | 4 | 0.11390336 | 0.47744371 |
| chr16 | 24406847 | 24467952 | 61106  | 1  | 4 | 2 | 0.18734596 | 0.0429175  | 4 | 4 | 0.18734596 | 0.47744371 |
| chr16 | 24467952 | 24567752 | 99801  | 1  | 3 | 2 | 0.17593012 | 0.0429175  | 3 | 4 | 0.17593012 | 0.47744371 |
| chr16 | 24567752 | 24622434 | 54683  | 1  | 3 | 2 | 0.17593012 | 0.08289318 | 3 | 3 | 0.17593012 | 0.30102999 |
| chr16 | 24622434 | 24622493 | 60     | 1  | 4 | 2 | 0.18734596 | 0.08289318 | 4 | 3 | 0.18734596 | 0.30102999 |
| chr16 | 24622493 | 24736165 | 113673 | 2  | 3 | 2 | 0.10122019 | 0.1575501  | 4 | 2 | 0.30102999 | 0.1575501  |
| chr16 | 24736165 | 24931032 | 194868 | 7  | 3 | 2 | 0.10122019 | 0.08289318 | 4 | 3 | 0.30102999 | 0.30102999 |
| chr16 | 24931032 | 25025443 | 94412  | 7  | 3 | 2 | 0.05670724 | 0.08289318 | 5 | 3 | 0.45545077 | 0.30102999 |
| chr16 | 25025443 | 25046309 | 20867  | 2  | 4 | 2 | 0.06713722 | 0.08289318 | 6 | 3 | 0.44141547 | 0.30102999 |
| chr16 | 25046309 | 25125765 | 79457  | 2  | 4 | 2 | 0.11390336 | 0.08289318 | 5 | 3 | 0.30102999 | 0.30102999 |
| chr16 | 25125765 | 25189500 | 63736  | 1  | 4 | 2 | 0.11390336 | 0.1575501  | 5 | 2 | 0.30102999 | 0.1575501  |
| chr16 | 25189500 | 25189552 | 53     | 1  | 4 | 2 | 0.06713722 | 0.1575501  | 6 | 2 | 0.44141547 | 0.1575501  |
| chr16 | 25189552 | 25830560 | 641009 | 6  | 4 | 2 | 0.18734596 | 0.1575501  | 4 | 2 | 0.18734596 | 0.1575501  |
| chr16 | 25830560 | 25985475 | 154916 | 3  | 3 | 2 | 0.30102999 | 0.1575501  | 2 | 2 | 0.08289318 | 0.1575501  |
| chr16 | 25985475 | 26124834 | 139560 | 2  | 3 | 2 | 0.15676182 | 0.1575501  | 1 | 2 | 0.02438896 | 0.1575501  |
| chr16 | 26124834 | 26166040 | 41207  | 2  | 3 | 2 | 0.30102999 | 0.1575501  | 2 | 2 | 0.08289318 | 0.1575501  |
| chr16 | 26166040 | 26310956 | 144917 | 2  | 3 | 2 | 0.17593012 | 0.1575501  | 3 | 2 | 0.17593012 | 0.1575501  |
| chr16 | 26310956 | 26451225 | 140270 | 3  | 2 | 2 | 0.10122019 | 0.1575501  | 4 | 2 | 0.30102999 | 0.1575501  |
| chr16 | 26451225 | 26451284 | 60     | 1  | 3 | 2 | 0.05670724 | 0.1575501  | 5 | 2 | 0.45545077 | 0.1575501  |
| chr16 | 26451284 | 26576490 | 125207 | 2  | 6 | 2 | 0.10122019 | 0.1575501  | 4 | 2 | 0.30102999 | 0.1575501  |
| chr16 | 26576490 | 26649748 | 73259  | 1  | 3 | 2 | 0.17593012 | 0.1575501  | 3 | 2 | 0.17593012 | 0.1575501  |
| chr16 | 26649748 | 26949140 | 299393 | 3  | 3 | 3 | 0.17593012 | 0.30102999 | 3 | 2 | 0.17593012 | 0.30102999 |
| chr16 | 26949140 | 27109354 | 160215 | 5  | 4 | 3 | 0.11390336 | 0.30102999 | 5 | 2 | 0.30102999 | 0.08289318 |
| chr16 | 27109354 | 27149350 | 39997  | 3  | 3 | 2 | 0.10122019 | 0.30102999 | 4 | 2 | 0.30102999 | 0.08289318 |
| chr16 | 27149350 | 27302547 | 153198 | 3  | 3 | 3 | 0.17593012 | 0.30102999 | 3 | 2 | 0.17593012 | 0.08289318 |
| chr16 | 27302547 | 27340054 | 37508  | 2  | 3 | 3 | 0.10122019 | 0.30102999 | 4 | 2 | 0.30102999 | 0.08289318 |
| chr16 | 27340054 | 27434487 | 94434  | 4  | 4 | 3 | 0.18734596 | 0.30102999 | 2 | 3 | 0.18734596 | 0.08289318 |
| chr16 | 27434487 | 27556808 | 123222 | 4  | 3 | 3 | 0.17593012 | 0.30102999 | 3 | 2 | 0.17593012 | 0.08289318 |
| chr16 | 27556808 | 27629808 | 73001  | 2  | 4 | 3 | 0.30102999 | 0.30102999 | 3 | 2 | 0.10122019 | 0.08289318 |
| chr16 | 27629808 | 27875894 | 246087 | 7  | 3 | 2 | 0.17593012 | 0.30102999 | 3 | 2 | 0.17593012 | 0.08289318 |
| chr16 | 27875894 | 27875953 | 60     | 1  | 4 | 3 | 0.30102999 | 0.30102999 | 3 | 2 | 0.10122019 | 0.08289318 |
| chr16 | 27875953 | 27897220 | 21268  | 1  | 3 | 3 | 0.17593012 | 0.30102999 | 3 | 2 | 0.17593012 | 0.08289318 |
| chr16 | 27897220 | 28054783 | 157564 | 4  | 3 | 3 | 0.17593012 | 0.17593012 | 3 | 3 | 0.17593012 | 0.17593012 |
| chr16 | 28054783 | 28143634 | 88852  | 2  | 3 | 3 | 0.51676182 | 0.30102999 | 1 | 2 | 0.02438896 | 0.08289318 |
| chr16 | 28143634 | 28143693 | 60     | 1  | 3 | 3 | 0.30102999 | 0.17593012 | 2 | 3 | 0.08289318 | 0.17593012 |
| chr16 | 28143693 | 28265770 | 122078 | 3  | 3 | 3 | 0.51676182 | 0.30102999 | 3 | 2 | 0.02438896 | 0.08289318 |
| chr16 | 28265770 | 28335137 | 69368  | 2  | 3 | 3 | 0.51676182 | 0.17593012 | 1 | 3 | 0.02438896 | 0.17593012 |
| chr16 | 28335137 | 28574419 | 239283 | 4  | 2 | 3 | 0.30102999 | 0.30102999 | 1 | 2 | 0.05404976 | 0.08289318 |
| chr16 | 28574419 | 28837450 | 263032 | 1  | 1 | 3 | 0.30102999 | 0.30102999 | 0 | 2 | 0          | 0.08289318 |
| chr16 | 28837450 | 28837509 | 60     | 1  | 3 | 3 | 0.30102999 | 0.17593012 | 0 | 3 | 0          | 0.17593012 |
| chr16 | 28837509 | 28876648 | 39140  | 2  | 1 | 3 | 0.30102999 | 0.30102999 | 0 | 2 | 0          | 0.08289318 |
| chr16 | 28876648 | 28933521 | 56874  | 4  | 1 | 3 | 0.30102999 | 0.17593012 | 0 | 3 | 0          | 0.17593012 |
| chr16 | 28933521 | 29042059 | 108539 | 6  | 1 | 3 | 0.05404976 | 0.17593012 | 2 | 3 | 0.30102999 | 0.17593012 |
| chr16 | 29042059 | 29042118 | 60     | 1  | 2 | 3 | 0.08289318 | 0.17593012 | 3 | 3 | 0.30102999 | 0.17593012 |
| chr16 | 29042118 | 29133735 | 91618  | 1  | 2 | 3 | 0.1575501  | 0.17593012 | 2 | 3 | 0.1575501  | 0.17593012 |
| chr16 | 29133735 | 29673954 | 540220 | 1  | 3 | 3 | 0.05404976 | 0.17593012 | 2 | 3 | 0.30102999 | 0.17593012 |
| chr16 | 29673954 | 29826837 | 152884 | 6  | 4 | 3 | 0.11390336 | 0.10122019 | 5 | 4 | 0.30102999 | 0.30102999 |
| chr16 | 29826837 | 29829405 | 2569   | 2  | 5 | 3 | 0.19510895 | 0.05670724 | 5 | 5 | 0.19510895 | 0.45545077 |
| chr16 | 29829405 | 30003192 | 173788 | 9  | 5 | 3 | 0.19510895 | 0.10122019 | 5 | 4 | 0.19510895 | 0.30102999 |
| chr16 | 30003192 | 30003244 | 53     | 1  | 6 | 3 | 0.30102999 | 0.10122019 | 5 | 4 | 0.12309572 | 0.30102999 |
| chr16 | 30003244 | 30010440 | 7197   | 2  | 6 | 3 | 0.44141547 | 0.10122019 | 4 | 4 | 0.06713722 | 0.30102999 |
| chr16 | 30010440 | 30074574 | 64135  | 5  | 6 | 3 | 0.30102999 | 0.10122019 | 5 | 4 | 0.12309572 | 0.30102999 |
| chr16 | 30074574 | 30119759 | 45186  | 4  | 5 | 3 | 0.19510895 | 0.10122019 | 5 | 4 | 0.19510895 | 0.30102999 |
| chr16 | 30119759 | 30131048 | 11290  | 2  | 5 | 3 | 0.30102999 | 0.10122019 | 4 | 4 | 0.11390336 | 0.30102999 |
| chr16 | 30131048 | 30197290 | 66243  | 2  | 5 | 3 | 0.19510895 | 0.10122019 | 5 | 4 | 0.19510895 | 0.30102999 |
| chr16 | 30197290 | 30197341 | 52     | 1  | 5 | 3 | 0.19510895 | 0.05670724 | 5 | 5 | 0.19510895 | 0.45545077 |
| chr16 | 30197341 | 30198600 | 1260   | 1  | 5 | 3 | 0.30102999 | 0.05670724 | 4 | 5 | 0.11390336 | 0.45545077 |
| chr16 | 30198600 | 30363912 | 165313 | 1  | 5 | 3 | 0.30102999 | 0.10122019 | 4 | 5 | 0.11390336 | 0.30102999 |
| chr16 | 30363912 | 30391326 | 27415  | 6  | 5 | 3 | 0.19510895 | 0.10122019 | 4 | 4 | 0.19510895 | 0.30102999 |
| chr16 | 30391326 | 30537377 | 146052 | 11 | 6 | 3 | 0.30102999 | 0.10122019 | 5 | 4 | 0.12309572 | 0.30102999 |
| chr16 | 30537377 | 30620353 | 82977  | 5  | 5 | 3 | 0.19510895 | 0.10122019 | 5 | 4 | 0.19510895 | 0.30102999 |
| chr16 | 30620353 | 30686125 | 61773  | 3  | 6 | 3 | 0.30102999 | 0.10122019 | 5 | 4 | 0.12309572 | 0.30102999 |
| chr16 | 30686125 | 30786447 | 104323 | 4  | 5 | 3 | 0.19510895 | 0.10122019 | 5 | 4 | 0.19510895 | 0.30102999 |
| chr16 | 30786447 | 30786504 | 60     | 1  | 6 | 3 | 0.30102999 | 0.10122019 | 3 | 4 | 0.12309572 | 0.30102999 |
| chr16 | 30786504 | 30826514 | 40011  | 1  | 5 | 3 | 0.19510895 | 0.10122019 | 5 | 4 | 0.19510895 | 0.30102999 |
| chr16 | 30826514 | 30899905 | 72582  | 1  | 5 | 3 | 0.30102999 | 0.10122019 | 4 | 4 | 0.11390336 | 0.30102999 |
| chr16 | 30899905 | 30910580 | 11486  | 3  | 4 | 4 | 0.44141547 | 0.18734596 | 4 | 4 | 0.06713722 | 0.18734596 |
| chr16 | 30910580 | 31504626 | 594047 | 31 | 4 | 4 | 0.18734596 | 0.18734596 | 4 | 4 | 0.18734596 | 0.18734596 |
| chr16 | 31504626 | 31542115 | 37490  | 1  | 4 | 4 | 0.10122019 | 0.18734596 | 4 | 4 | 0.30102999 | 0.18734596 |
| chr16 | 31542115 | 31542174 | 60     | 1  | 3 | 4 | 0.05670724 | 0.18734596 | 5 | 4 | 0.45545077 | 0.18734596 |
| chr16 | 31542174 | 31611798 | 69625  | 1  | 2 | 4 | 0.0429175  | 0.18734596 | 4 | 4 | 0.47744371 | 0.18734596 |
| chr16 | 31611798 | 31693728 | 81931  | 2  | 1 | 3 | 0.01091641 | 0.17593012 | 3 | 3 | 0.76005302 | 0.17593012 |
| chr16 | 31693728 | 31713018 | 19291  | 2  | 2 | 3 | 0.0429175  | 0.17593012 | 4 | 3 | 0.47744371 | 0.17593012 |
| chr16 | 31713018 | 31928113 | 215096 | 6  | 1 | 3 | 0.01091641 | 0.17593012 | 4 | 3 | 0.76005302 | 0.17593012 |
| chr16 | 31928113 | 33604468 | 218729 | 4  | 0 | 0 | 0          | 0          | 0 | 0 | 0.30102999 | 0.30102999 |
| chr16 | 33604468 | 46564557 | 71388  | 4  | 1 | 1 | 0.30102999 | 0.05404976 | 0 | 2 | 0          | 0.30102999 |
| chr16 | 46564557 | 46635944 | 71388  | 4  | 1 | 1 | 0.30102999 | 0.05404976 | 0 | 2 | 0          | 0.30102999 |
| chr16 | 46635944 | 46722095 | 86152  | 2  | 1 | 0 | 0.30102999 | 0          | 0 | 0 | 0.61140001 | 0          |
| chr16 | 46722095 | 46755071 | 32977  | 5  | 1 | 1 | 0.30102999 | 0.05404976 | 0 | 2 | 0          | 0.30102999 |
| chr16 | 46755071 | 46909077 | 154007 | 3  | 1 | 0 | 0.30102999 | 0          | 0 | 0 | 0.61140001 | 0          |
| chr16 | 46909077 | 47124710 | 215634 | 7  | 1 | 1 | 0.30102999 | 0.02438896 | 0 | 3 | 0          | 0.51676182 |
| chr16 | 47124710 | 47192846 | 68137  | 4  | 1 | 1 | 0.30102999 | 0.01091641 | 0 | 4 | 0          | 0.76005302 |
| chr16 | 47192846 | 47192905 | 60     | 1  | 2 | 2 | 0.30102999 | 0.02162467 | 0 | 5 | 0          | 0.68214471 |
| chr16 | 47192905 | 47271928 | 79024  | 2  | 1 | 1 | 0.30102999 | 0.00478973 | 0 | 0 | 0          | 1.02643191 |
| chr16 | 47271928 | 47399807 | 127880 | 2  | 1 | 1 | 0.30102999 | 0.01091641 | 0 | 0 | 0          | 0.76005302 |
| chr16 | 47399807 | 47462659 | 62853  | 2  | 1 | 1 | 0.30102999 | 0.00478973 | 0 | 0 | 0          | 1.02643191 |
| chr16 | 47462659 | 47462718 | 60     | 1  | 1 | 2 | 0.30102999 | 0.02162467 | 0 | 5 | 0          | 0.68214471 |
| chr16 | 47462718 | 47534824 | 72107  | 3  | 1 | 2 | 0.30102999 | 0.0429175  | 0 | 4 | 0          | 0.47744371 |
| chr16 | 47534824 | 47581324 | 46501  | 1  | 1 | 1 | 0.30102    |            |   |   |            |            |

|       |          |          |        |   |   |   |            |            |   |   |            |            |
|-------|----------|----------|--------|---|---|---|------------|------------|---|---|------------|------------|
| chr16 | 50189841 | 50259119 | 69279  | 2 | 2 | 1 | 0.6114001  | 8.47E-04   | 0 | 7 | 0          | 1.62048027 |
| chr16 | 50259119 | 50586932 | 327814 | 6 | 2 | 1 | 0.6114001  | 0.00204627 | 0 | 6 | 0          | 1.31360226 |
| chr16 | 50586932 | 50759506 | 172575 | 6 | 2 | 1 | 0.30102999 | 0.00204627 | 1 | 6 | 0.05404976 | 1.31360226 |
| chr16 | 50759506 | 50818240 | 58735  | 3 | 2 | 1 | 0.30102999 | 0.00478973 | 1 | 5 | 0.05404976 | 1.02643191 |
| chr16 | 50818240 | 50818299 | 60     | 1 | 2 | 1 | 0.30102999 | 0.00204627 | 1 | 6 | 0.05404976 | 1.31360226 |
| chr16 | 50818299 | 50870832 | 52534  | 1 | 2 | 1 | 0.6114001  | 0.00478973 | 1 | 5 | 0          | 1.02643191 |
| chr16 | 50870832 | 51178627 | 307796 | 3 | 2 | 1 | 0.6114001  | 0.01091641 | 0 | 4 | 0          | 0.76005302 |
| chr16 | 51178627 | 51183149 | 4523   | 2 | 2 | 1 | 0.6114001  | 8.47E-04   | 0 | 7 | 0          | 1.62048027 |
| chr16 | 51183149 | 51584053 | 400905 | 3 | 1 | 1 | 0.30102999 | 0.00204627 | 0 | 6 | 0          | 1.31360226 |
| chr16 | 51584053 | 51584112 | 60     | 1 | 1 | 1 | 0.30102999 | 8.47E-04   | 0 | 7 | 0          | 1.62048027 |
| chr16 | 51584112 | 52010526 | 426415 | 4 | 1 | 1 | 0.30102999 | 0.00204627 | 0 | 6 | 0          | 1.31360226 |
| chr16 | 52010526 | 52010585 | 60     | 1 | 2 | 0 | 0.30102999 | 0.01053319 | 0 | 6 | 0          | 0.91219088 |
| chr16 | 52010585 | 52216416 | 205832 | 3 | 1 | 1 | 0.30102999 | 0.00204627 | 0 | 6 | 0          | 1.31360226 |
| chr16 | 52216416 | 52416229 | 199814 | 2 | 1 | 1 | 0.30102999 | 0.00478973 | 0 | 5 | 0          | 1.02643191 |
| chr16 | 52416229 | 52416288 | 60     | 1 | 1 | 1 | 0.30102999 | 0.00204627 | 0 | 6 | 0          | 1.31360226 |
| chr16 | 52416288 | 52475326 | 59039  | 2 | 1 | 1 | 0.30102999 | 0.01091641 | 0 | 4 | 0          | 0.76005302 |
| chr16 | 52475326 | 52514513 | 39188  | 4 | 1 | 1 | 0.30102999 | 0.00478973 | 0 | 5 | 0          | 1.02643191 |
| chr16 | 52514513 | 52514572 | 60     | 1 | 2 | 0 | 0.30102999 | 0.00493743 | 0 | 7 | 0          | 1.16581773 |
| chr16 | 52514572 | 52668156 | 153585 | 2 | 1 | 2 | 0.30102999 | 0.02162467 | 0 | 5 | 0          | 0.68214471 |
| chr16 | 52668156 | 52668215 | 60     | 1 | 2 | 0 | 0.30102999 | 9.54E-04   | 0 | 9 | 0          | 1.74076927 |
| chr16 | 52668215 | 52726250 | 58036  | 1 | 1 | 2 | 0.30102999 | 0.01053319 | 0 | 6 | 0          | 0.91219088 |
| chr16 | 52726250 | 52916718 | 190469 | 2 | 1 | 2 | 0.30102999 | 0.02162467 | 0 | 5 | 0          | 0.68214471 |
| chr16 | 52916718 | 53016229 | 69512  | 2 | 2 | 2 | 0.30102999 | 0.01053319 | 1 | 6 | 0.05404976 | 0.91219088 |
| chr16 | 53016229 | 53079453 | 63225  | 2 | 2 | 2 | 0.1575501  | 0.00493743 | 2 | 7 | 0.1575501  | 1.16581773 |
| chr16 | 53079453 | 53131202 | 51750  | 1 | 2 | 2 | 0.30102999 | 0.01053319 | 1 | 1 | 0.05404976 | 0.91219088 |
| chr16 | 53131202 | 53131261 | 60     | 1 | 3 | 0 | 0.30102999 | 0.03070643 | 0 | 6 | 0.05404976 | 0.63695542 |
| chr16 | 53131261 | 53204718 | 73458  | 2 | 2 | 3 | 0.30102999 | 0.05670724 | 1 | 5 | 0.05404976 | 0.45545077 |
| chr16 | 53204718 | 53250110 | 45393  | 1 | 2 | 3 | 0.30102999 | 0.01122019 | 1 | 4 | 0.05404976 | 0.30102999 |
| chr16 | 53250110 | 53360707 | 110598 | 4 | 2 | 3 | 0.1575501  | 0.01122019 | 2 | 4 | 0.1575501  | 0.30102999 |
| chr16 | 53360707 | 53472921 | 112215 | 2 | 2 | 2 | 0.1575501  | 0.08289318 | 2 | 3 | 0.1575501  | 0.30102999 |
| chr16 | 53472921 | 53472980 | 60     | 1 | 3 | 3 | 0.30102999 | 0.17593012 | 2 | 3 | 0.08289318 | 0.17593012 |
| chr16 | 53472980 | 53513110 | 40131  | 3 | 3 | 3 | 0.51676182 | 0.17593012 | 1 | 3 | 0.02438896 | 0.17593012 |
| chr16 | 53513110 | 53553005 | 39896  | 1 | 3 | 2 | 0.51676182 | 0.1575501  | 0 | 2 | 0.02438896 | 0.1575501  |
| chr16 | 53553005 | 53581735 | 28731  | 2 | 3 | 2 | 0.30102999 | 0.1575501  | 2 | 2 | 0.08289318 | 0.1575501  |
| chr16 | 53581735 | 53581794 | 60     | 1 | 3 | 2 | 0.30102999 | 0.08289318 | 2 | 3 | 0.08289318 | 0.30102999 |
| chr16 | 53581794 | 53634880 | 53087  | 1 | 3 | 2 | 0.30102999 | 0.1575501  | 2 | 2 | 0.08289318 | 0.1575501  |
| chr16 | 53634880 | 53779703 | 144824 | 3 | 2 | 2 | 0.1575501  | 0.1575501  | 2 | 2 | 0.1575501  | 0.1575501  |
| chr16 | 53779703 | 53913895 | 134193 | 4 | 3 | 2 | 0.30102999 | 0.1575501  | 2 | 2 | 0.08289318 | 0.1575501  |
| chr16 | 53913895 | 54017327 | 103433 | 2 | 3 | 2 | 0.30102999 | 0.30102999 | 2 | 1 | 0.08289318 | 0.05404976 |
| chr16 | 54017327 | 54051169 | 33843  | 2 | 3 | 2 | 0.30102999 | 0.1575501  | 2 | 2 | 0.08289318 | 0.1575501  |
| chr16 | 54051169 | 54094122 | 42954  | 1 | 3 | 2 | 0.30102999 | 0.30102999 | 2 | 1 | 0.08289318 | 0.05404976 |
| chr16 | 54094122 | 54147332 | 53211  | 1 | 2 | 2 | 0.05404976 | 0.30102999 | 2 | 1 | 0.30102999 | 0.05404976 |
| chr16 | 54147332 | 54147385 | 54     | 1 | 1 | 2 | 0.05404976 | 0.1575501  | 2 | 2 | 0.30102999 | 0.1575501  |
| chr16 | 54147385 | 54206543 | 59159  | 1 | 2 | 1 | 0.1218695  | 0.30102999 | 1 | 1 | 0.1218695  | 0.05404976 |
| chr16 | 54206543 | 54424288 | 217746 | 2 | 1 | 2 | 0.30102999 | 0.30102999 | 0 | 1 | 0          | 0.05404976 |
| chr16 | 54424288 | 54424347 | 60     | 1 | 2 | 0 | 0.30102999 | 0.1575501  | 0 | 2 | 0          | 0.1575501  |
| chr16 | 54424347 | 54574556 | 150210 | 1 | 1 | 2 | 0.30102999 | 0.30102999 | 0 | 1 | 0          | 0.05404976 |
| chr16 | 54574556 | 54759169 | 184614 | 1 | 1 | 1 | 0.30102999 | 0.1218695  | 0 | 1 | 0.1218695  | 0.1218695  |
| chr16 | 54759169 | 54759228 | 60     | 1 | 2 | 1 | 0.6114001  | 0.1218695  | 0 | 1 | 0          | 0.1218695  |
| chr16 | 54759228 | 54965673 | 206446 | 1 | 1 | 1 | 0.30102999 | 0.1218695  | 0 | 1 | 0          | 0.1218695  |
| chr16 | 54965673 | 55232047 | 257375 | 4 | 1 | 2 | 0.30102999 | 0.30102999 | 1 | 0 | 0.05404976 | 0.1575501  |
| chr16 | 55232047 | 55361181 | 138135 | 3 | 1 | 2 | 0.30102999 | 0.1575501  | 0 | 2 | 0          | 0.1575501  |
| chr16 | 55361181 | 55532306 | 171126 | 4 | 1 | 2 | 0.30102999 | 0.08289318 | 0 | 2 | 0          | 0.30102999 |
| chr16 | 55532306 | 55539880 | 7575   | 2 | 1 | 2 | 0.30102999 | 0.02162467 | 0 | 5 | 0          | 0.68214471 |
| chr16 | 55539880 | 55695424 | 155545 | 4 | 1 | 2 | 0.30102999 | 0.01053319 | 0 | 6 | 0          | 0.91219088 |
| chr16 | 55695424 | 55778920 | 83497  | 5 | 1 | 2 | 0.1218695  | 0.01053319 | 1 | 6 | 0.1218695  | 0.91219088 |
| chr16 | 55778920 | 55875707 | 96788  | 3 | 1 | 2 | 0.1218695  | 0.00493743 | 1 | 7 | 0.1218695  | 1.16581773 |
| chr16 | 55875707 | 56038617 | 162911 | 3 | 1 | 2 | 0.05404976 | 0.00493743 | 2 | 7 | 0.30102999 | 1.16581773 |
| chr16 | 56038617 | 56149936 | 111320 | 1 | 1 | 2 | 0.1218695  | 0.00493743 | 1 | 7 | 0.1218695  | 1.16581773 |
| chr16 | 56149936 | 56227480 | 77545  | 1 | 2 | 1 | 0.1218695  | 0.01053319 | 1 | 6 | 0.1218695  | 0.91219088 |
| chr16 | 56227480 | 56403201 | 175722 | 8 | 1 | 2 | 0.02438896 | 0.01053319 | 3 | 6 | 0.51676182 | 0.91219088 |
| chr16 | 56403201 | 56525520 | 122320 | 5 | 1 | 2 | 0.02438896 | 0.00493743 | 3 | 7 | 0.51676182 | 1.16581773 |
| chr16 | 56525520 | 56601667 | 76148  | 5 | 2 | 2 | 0.08289318 | 0.00493743 | 3 | 7 | 0.30102999 | 1.16581773 |
| chr16 | 56601667 | 56601722 | 56     | 1 | 2 | 2 | 0.08289318 | 0.00221948 | 3 | 8 | 0.30102999 | 1.44210395 |
| chr16 | 56601722 | 56672771 | 71050  | 3 | 2 | 1 | 0.6114001  | 8.47E-04   | 0 | 7 | 0.30102999 | 1.62048027 |
| chr16 | 56672771 | 56701034 | 28264  | 7 | 2 | 1 | 0.08289318 | 3.39E-04   | 3 | 8 | 0.30102999 | 0.91219088 |
| chr16 | 56701034 | 56717498 | 16465  | 1 | 2 | 1 | 0.1575501  | 8.47E-04   | 2 | 7 | 0.1575501  | 1.62048027 |
| chr16 | 56717498 | 56770921 | 53424  | 1 | 2 | 1 | 0.1575501  | 0.00204627 | 2 | 2 | 0.1575501  | 1.31360226 |
| chr16 | 56770921 | 56836148 | 65228  | 1 | 1 | 2 | 0.05404976 | 0.00478973 | 1 | 5 | 0.30102999 | 1.02643191 |
| chr16 | 56836148 | 56836207 | 60     | 1 | 1 | 2 | 0.05404976 | 0.01053319 | 2 | 6 | 0.30102999 | 0.91219088 |
| chr16 | 56836207 | 56868257 | 32051  | 1 | 1 | 2 | 0.05404976 | 0.00204627 | 2 | 6 | 0.30102999 | 1.31360226 |
| chr16 | 56868257 | 56970235 | 101979 | 5 | 2 | 1 | 0.1575501  | 8.47E-04   | 2 | 7 | 0.1575501  | 1.62048027 |
| chr16 | 56970235 | 57063106 | 92872  | 4 | 2 | 0 | 0.1575501  | 0.00493743 | 2 | 7 | 0.1575501  | 1.16581773 |
| chr16 | 57063106 | 57207612 | 144507 | 5 | 2 | 2 | 0.08289318 | 0.00493743 | 3 | 7 | 0.30102999 | 1.16581773 |
| chr16 | 57207612 | 57279797 | 72186  | 5 | 3 | 2 | 0.17593012 | 0.00493743 | 3 | 7 | 0.17593012 | 1.16581773 |
| chr16 | 57279797 | 57394795 | 114999 | 2 | 2 | 2 | 0.08289318 | 0.00493743 | 3 | 7 | 0.30102999 | 1.16581773 |
| chr16 | 57394795 | 57448234 | 53440  | 3 | 3 | 2 | 0.17593012 | 0.00493743 | 3 | 7 | 0.17593012 | 1.16581773 |
| chr16 | 57448234 | 57482107 | 33874  | 4 | 3 | 2 | 0.17593012 | 0.00221948 | 3 | 8 | 0.17593012 | 1.44210395 |
| chr16 | 57482107 | 57605006 | 122900 | 4 | 3 | 2 | 0.17593012 | 0.00493743 | 3 | 7 | 0.17593012 | 1.16581773 |
| chr16 | 57605006 | 57605065 | 60     | 1 | 4 | 2 | 0.30102999 | 0.00493743 | 3 | 7 | 0.10122019 | 1.16581773 |
| chr16 | 57605065 | 57671289 | 66225  | 1 | 4 | 2 | 0.30102999 | 0.01053319 | 3 | 6 | 0.10122019 | 0.91219088 |
| chr16 | 57671289 | 57685009 | 13721  | 1 | 4 | 2 | 0.30102999 | 0.0429175  | 3 | 4 | 0.10122019 | 0.47744371 |
| chr16 | 57685009 | 57748589 | 63581  | 2 | 4 | 2 | 0.30102999 | 0.08289318 | 3 | 3 | 0.10122019 | 0.30102999 |
| chr16 | 57748589 | 57748648 | 60     | 1 | 4 | 2 | 0.30102999 | 0.02162467 | 3 | 5 | 0.10122019 | 0.68214471 |
| chr16 | 57748648 | 57950099 | 201452 | 7 | 4 | 2 | 0.30102999 | 0.0429175  | 3 | 4 | 0.10122019 | 0.47744371 |
| chr16 | 57950099 | 58003556 | 53458  | 2 | 4 | 2 | 0.30102999 | 0.08289318 | 3 | 3 | 0.10122019 | 0.30102999 |
| chr16 | 58003556 | 58003615 | 60     | 1 | 5 | 2 | 0.45545077 | 0.0429175  | 3 | 4 | 0.05670724 | 0.47744371 |
| chr16 | 58003615 | 58032165 | 28551  | 2 | 4 | 2 | 0.30102999 | 0.08289318 | 3 | 3 | 0.10122019 | 0.30102999 |
| chr16 | 58032165 | 58047428 | 15264  | 2 | 5 | 2 | 0.45545077 | 0.08289318 | 3 | 3 | 0.05670724 | 0.30102999 |
| chr16 | 58047428 | 58154857 | 107430 | 5 | 4 | 2 | 0.30102999 | 0.08289318 | 3 | 3 | 0.10122019 | 0.30102999 |
| chr16 | 58154857 | 58230636 | 75780  | 2 | 4 | 2 | 0.47744371 | 0.08289318 | 2 | 3 | 0.0429175  | 0.30102999 |
| chr16 | 58230636 | 58230695 | 60     | 1 |   |   |            |            |   |   |            |            |

|       |          |          |        |    |   |   |            |            |   |   |   |            |
|-------|----------|----------|--------|----|---|---|------------|------------|---|---|---|------------|
| chr16 | 61450070 | 61450129 | 60     | 1  | 0 | 1 | 0          | 0.00478973 | 0 | 5 | 0 | 1.02643191 |
| chr16 | 61450129 | 61594312 | 144184 | 2  | 0 | 1 | 0          | 0.01091641 | 0 | 4 | 0 | 0.76005302 |
| chr16 | 61594312 | 61992442 | 398131 | 7  | 0 | 0 | 0          | 0.00478973 | 0 | 5 | 0 | 1.02643191 |
| chr16 | 61992442 | 62127967 | 135526 | 2  | 0 | 0 | 0          | 0          | 0 | 5 | 0 | 1.60515106 |
| chr16 | 62127967 | 62213294 | 85328  | 2  | 0 | 1 | 0          | 0.00478973 | 0 | 5 | 0 | 1.02643191 |
| chr16 | 62213294 | 62377344 | 164051 | 2  | 0 | 1 | 0          | 0.01091641 | 0 | 4 | 0 | 0.76005302 |
| chr16 | 62377344 | 62550291 | 172948 | 1  | 0 | 0 | 0          | 0          | 0 | 3 | 0 | 0.93173516 |
| chr16 | 62550291 | 62705691 | 155401 | 2  | 0 | 0 | 0          | 0          | 0 | 2 | 0 | 0.61140001 |
| chr16 | 63494668 | 63494727 | 60     | 1  | 0 | 0 | 0          | 0          | 0 | 1 | 0 | 0.30102999 |
| chr16 | 63841326 | 64029225 | 187900 | 3  | 0 | 1 | 0          | 0.30102999 | 0 | 0 | 0 | 0          |
| chr16 | 64029225 | 64127002 | 97778  | 2  | 0 | 0 | 0          | 0.61140001 | 0 | 0 | 0 | 0          |
| chr16 | 64127002 | 64307257 | 180256 | 3  | 0 | 2 | 0          | 0.30102999 | 0 | 1 | 0 | 0.05404976 |
| chr16 | 64307257 | 64478894 | 171638 | 3  | 0 | 2 | 0          | 0.08289318 | 0 | 3 | 0 | 0.30102999 |
| chr16 | 64478894 | 64579241 | 100348 | 2  | 0 | 2 | 0          | 0.0429175  | 0 | 4 | 0 | 0.47744371 |
| chr16 | 64579241 | 64868751 | 289511 | 4  | 0 | 3 | 0          | 0.10122019 | 0 | 4 | 0 | 0.30102999 |
| chr16 | 64868751 | 65022158 | 153408 | 5  | 0 | 3 | 0          | 0.10122019 | 1 | 4 | 0 | 0.30102999 |
| chr16 | 65022158 | 65087748 | 65591  | 3  | 0 | 3 | 0          | 0.17593012 | 1 | 3 | 0 | 0.17593012 |
| chr16 | 65087748 | 65121456 | 33709  | 1  | 0 | 2 | 0          | 0.08289318 | 1 | 3 | 0 | 0.30102999 |
| chr16 | 65121456 | 65121515 | 60     | 1  | 0 | 2 | 0          | 0.0429175  | 1 | 4 | 0 | 0.47744371 |
| chr16 | 65121515 | 65385523 | 264009 | 3  | 0 | 2 | 1          | 0.08289318 | 1 | 3 | 0 | 0.30102999 |
| chr16 | 65385523 | 65453448 | 67926  | 2  | 0 | 2 | 0          | 0.0429175  | 1 | 4 | 0 | 0.30102999 |
| chr16 | 65453448 | 65594848 | 141401 | 3  | 0 | 3 | 0          | 0.0429175  | 2 | 4 | 0 | 0.47744371 |
| chr16 | 65594848 | 65641590 | 46743  | 1  | 0 | 1 | 0          | 0.01091641 | 2 | 4 | 0 | 0.76005302 |
| chr16 | 65641590 | 65641649 | 60     | 1  | 0 | 1 | 0          | 0.00204627 | 2 | 6 | 0 | 1.31360226 |
| chr16 | 65641649 | 65832665 | 191017 | 1  | 0 | 1 | 0          | 0.00478973 | 2 | 5 | 0 | 1.02643191 |
| chr16 | 65832665 | 65986566 | 153902 | 2  | 0 | 1 | 0          | 0.00478973 | 3 | 5 | 0 | 1.02643191 |
| chr16 | 65986566 | 65986625 | 60     | 1  | 0 | 1 | 0          | 0.00204627 | 4 | 6 | 0 | 1.31360226 |
| chr16 | 65986625 | 66097955 | 111331 | 1  | 0 | 1 | 0          | 0.00478973 | 4 | 5 | 0 | 1.02643191 |
| chr16 | 66097955 | 66098014 | 60     | 1  | 1 | 1 | 0.01091641 | 0.00478973 | 4 | 5 | 0 | 0.76005302 |
| chr16 | 66098014 | 66215342 | 117329 | 1  | 1 | 1 | 0.01091641 | 0.01091641 | 4 | 4 | 0 | 0.76005302 |
| chr16 | 66215342 | 66343935 | 128594 | 2  | 2 | 2 | 0.0429175  | 0.0429175  | 4 | 4 | 0 | 0.47744371 |
| chr16 | 66343935 | 66343994 | 60     | 1  | 3 | 2 | 0.10122019 | 0.1053319  | 4 | 6 | 0 | 0.30102999 |
| chr16 | 66343994 | 66413433 | 69440  | 2  | 3 | 2 | 0.10122019 | 0.02162467 | 4 | 5 | 0 | 0.30102999 |
| chr16 | 66413433 | 66422302 | 8870   | 1  | 3 | 2 | 0.17593012 | 0.02162467 | 3 | 5 | 0 | 0.68214471 |
| chr16 | 66422302 | 66426646 | 4345   | 2  | 3 | 2 | 0.17593012 | 0.1053319  | 3 | 6 | 0 | 0.91219088 |
| chr16 | 66426646 | 66491377 | 64732  | 2  | 3 | 2 | 0.10122019 | 0.1053319  | 4 | 6 | 0 | 0.30102999 |
| chr16 | 66491377 | 66491436 | 60     | 1  | 4 | 2 | 0.18734596 | 0.00493743 | 4 | 7 | 0 | 1.16581773 |
| chr16 | 66491436 | 66583180 | 91745  | 2  | 4 | 2 | 0.18734596 | 0.1053319  | 4 | 6 | 0 | 0.91219088 |
| chr16 | 66583180 | 66593588 | 10409  | 2  | 4 | 2 | 0.18734596 | 0.00493743 | 4 | 7 | 0 | 1.16581773 |
| chr16 | 66593588 | 66764558 | 170971 | 7  | 4 | 2 | 0.18734596 | 0.1053319  | 4 | 7 | 0 | 0.91219088 |
| chr16 | 66764558 | 66791611 | 27054  | 2  | 4 | 2 | 0.18734596 | 0.00493743 | 4 | 7 | 0 | 1.16581773 |
| chr16 | 66791611 | 66852420 | 60810  | 3  | 4 | 2 | 0.10122019 | 0.00493743 | 4 | 7 | 0 | 1.16581773 |
| chr16 | 66852420 | 66852479 | 60     | 1  | 4 | 2 | 0.18734596 | 0.00493743 | 4 | 7 | 0 | 1.16581773 |
| chr16 | 66852479 | 66885876 | 33398  | 1  | 3 | 2 | 0.10122019 | 0.1053319  | 4 | 6 | 0 | 0.91219088 |
| chr16 | 66885876 | 66918257 | 32382  | 1  | 2 | 2 | 0.0429175  | 0.1053319  | 4 | 6 | 0 | 0.91219088 |
| chr16 | 66918257 | 66918316 | 60     | 1  | 3 | 3 | 0.10122019 | 0.1598258  | 4 | 7 | 0 | 0.84395715 |
| chr16 | 66918316 | 66965995 | 47680  | 4  | 3 | 3 | 0.10122019 | 0.03070643 | 4 | 6 | 0 | 0.63695542 |
| chr16 | 66965995 | 66972737 | 6743   | 2  | 4 | 3 | 0.18734596 | 0.0079614  | 4 | 8 | 0 | 1.07548421 |
| chr16 | 66972737 | 67123439 | 150703 | 7  | 3 | 3 | 0.10122019 | 0.0079614  | 4 | 8 | 0 | 1.07548421 |
| chr16 | 67123439 | 67168949 | 45511  | 2  | 3 | 4 | 0.10122019 | 0.01077081 | 4 | 9 | 0 | 1.01542894 |
| chr16 | 67168949 | 67221674 | 52726  | 8  | 3 | 3 | 0.10122019 | 0.0079614  | 4 | 9 | 0 | 1.07548421 |
| chr16 | 67221674 | 67366051 | 144378 | 13 | 3 | 3 | 0.10122019 | 0.00378107 | 4 | 9 | 0 | 1.33111237 |
| chr16 | 67366051 | 67418379 | 52329  | 3  | 4 | 4 | 0.10122019 | 0.01077081 | 4 | 9 | 0 | 1.01542894 |
| chr16 | 67418379 | 67420757 | 2379   | 2  | 4 | 4 | 0.18734596 | 0.01077081 | 4 | 9 | 0 | 1.01542894 |
| chr16 | 67420757 | 67466496 | 45740  | 3  | 4 | 4 | 0.18734596 | 0.02074938 | 4 | 8 | 0 | 0.79906872 |
| chr16 | 67466496 | 67550252 | 83757  | 3  | 4 | 4 | 0.18734596 | 0.03812622 | 4 | 7 | 0 | 0.60763643 |
| chr16 | 67550252 | 67605041 | 54790  | 3  | 4 | 4 | 0.18734596 | 0.02074938 | 4 | 8 | 0 | 0.79906872 |
| chr16 | 67605041 | 67605094 | 54     | 1  | 4 | 4 | 0.11390336 | 0.02074938 | 5 | 8 | 0 | 0.30102999 |
| chr16 | 67605094 | 67616190 | 11097  | 1  | 4 | 3 | 0.18734596 | 0.01598258 | 4 | 7 | 0 | 0.84395715 |
| chr16 | 67616190 | 67672633 | 56444  | 2  | 3 | 3 | 0.10122019 | 0.01598258 | 4 | 7 | 0 | 0.30102999 |
| chr16 | 67672633 | 67739020 | 66388  | 5  | 3 | 3 | 0.05670724 | 0.01598258 | 5 | 7 | 0 | 0.84395715 |
| chr16 | 67739020 | 67759724 | 20705  | 2  | 4 | 3 | 0.11390336 | 0.01598258 | 5 | 7 | 0 | 0.84395715 |
| chr16 | 67759724 | 67759783 | 60     | 1  | 5 | 3 | 0.19510895 | 0.01598258 | 5 | 7 | 0 | 0.19510895 |
| chr16 | 67759783 | 67804258 | 44476  | 2  | 4 | 3 | 0.11390336 | 0.01598258 | 5 | 7 | 0 | 0.30102999 |
| chr16 | 67804258 | 67804317 | 60     | 1  | 5 | 3 | 0.19510895 | 0.01598258 | 5 | 7 | 0 | 0.19510895 |
| chr16 | 67804317 | 67855497 | 52181  | 1  | 4 | 3 | 0.18734596 | 0.03070643 | 4 | 6 | 0 | 0.63695542 |
| chr16 | 67855497 | 67855552 | 56     | 1  | 3 | 3 | 0.18734596 | 0.0079614  | 4 | 8 | 0 | 1.07548421 |
| chr16 | 67855552 | 67863844 | 7293   | 1  | 3 | 3 | 0.10122019 | 0.0079614  | 4 | 8 | 0 | 1.07548421 |
| chr16 | 67863844 | 67933130 | 69287  | 7  | 3 | 4 | 0.10122019 | 0.00378107 | 4 | 9 | 0 | 1.33111237 |
| chr16 | 67933130 | 67973757 | 40628  | 4  | 3 | 3 | 0.10122019 | 0.0079614  | 4 | 8 | 0 | 1.07548421 |
| chr16 | 67973757 | 67978436 | 4680   | 3  | 3 | 3 | 0.05670724 | 0.0079614  | 5 | 8 | 0 | 1.07548421 |
| chr16 | 67978436 | 68021348 | 42913  | 2  | 3 | 3 | 0.10122019 | 0.01598258 | 4 | 7 | 0 | 0.30102999 |
| chr16 | 68021348 | 68026336 | 4989   | 1  | 3 | 3 | 0.17593012 | 0.01598258 | 3 | 7 | 0 | 0.84395715 |
| chr16 | 68026336 | 68055426 | 29091  | 1  | 3 | 3 | 0.17593012 | 0.03070643 | 4 | 6 | 0 | 0.63695542 |
| chr16 | 68055426 | 68059401 | 3976   | 2  | 3 | 3 | 0.10122019 | 0.01598258 | 4 | 7 | 0 | 0.30102999 |
| chr16 | 68059401 | 68173318 | 113918 | 3  | 3 | 3 | 0.10122019 | 0.03070643 | 4 | 6 | 0 | 0.63695542 |
| chr16 | 68173318 | 68225693 | 52376  | 1  | 2 | 3 | 0.0429175  | 0.03070643 | 4 | 6 | 0 | 0.63695542 |
| chr16 | 68225693 | 68225752 | 60     | 1  | 2 | 3 | 0.02162467 | 0.03070643 | 5 | 6 | 0 | 0.68214471 |
| chr16 | 68225752 | 68401681 | 175930 | 9  | 2 | 3 | 0.02162467 | 0.05670724 | 5 | 5 | 0 | 0.45545077 |
| chr16 | 68401681 | 68401731 | 51     | 1  | 2 | 3 | 0.02162467 | 0.03070643 | 5 | 6 | 0 | 0.68214471 |
| chr16 | 68401731 | 68550119 | 148389 | 3  | 2 | 3 | 0.02162467 | 0.05670724 | 5 | 5 | 0 | 0.45545077 |
| chr16 | 68550119 | 68550178 | 60     | 1  | 3 | 3 | 0.02162467 | 0.03070643 | 5 | 6 | 0 | 0.68214471 |
| chr16 | 68550178 | 68681927 | 131750 | 3  | 1 | 3 | 0.00478973 | 0.03070643 | 5 | 6 | 0 | 1.02643191 |
| chr16 | 68681927 | 68712060 | 30134  | 1  | 1 | 3 | 0.01091641 | 0.05670724 | 4 | 5 | 0 | 0.76005302 |
| chr16 | 68712060 | 68723501 | 11442  | 2  | 3 | 3 | 0.10122019 | 0.05670724 | 4 | 5 | 0 | 0.30102999 |
| chr16 | 68723501 | 68746468 | 22968  | 2  | 3 | 3 | 0.10122019 | 0.03070643 | 4 | 6 | 0 | 0.63695542 |
| chr16 | 68746468 | 68789598 | 43131  | 3  | 3 | 3 | 0.05670724 | 0.03070643 | 5 | 6 | 0 | 0.63695542 |
| chr16 | 68789598 | 68857339 | 67742  | 1  | 3 | 3 | 0.05670724 | 0.05670724 | 5 | 5 | 0 | 0.45545077 |
| chr16 | 68857339 | 68875640 | 18302  | 1  | 3 | 2 | 0.05670724 | 0.02162467 | 5 | 5 | 0 | 0.68214471 |
| chr16 | 68875640 | 68961456 | 85817  | 2  | 3 | 2 | 0.05670724 | 0.0429175  | 4 | 4 | 0 | 0.47744371 |
| chr16 | 68961456 | 68961515 | 60     | 1  | 3 | 2 | 0.05670724 | 0.02162467 | 5 | 5 | 0 | 0.68214471 |
| chr16 | 68961515 | 69030264 | 68750  | 1  | 2 | 2 | 0.0429175  | 0.0429175  | 4 | 4 | 0 | 0.47744371 |
| chr16 | 69030264 | 69030323 | 60     | 1  | 2 | 2 | 0.0429175  | 0.02162467 | 4 | 5 | 0 | 0.68214471 |
| chr16 | 69030323 | 69304027 | 273705 | 10 | 2 | 2 | 0.0429175  | 0.0429175  | 4 | 4 | 0 | 0.47744371 |
| chr16 | 69304027 | 69304080 | 54     | 1  | 2 | 2 | 0.0429175  | 0.1053319  | 4 | 6 | 0 | 0.91219088 |
| chr16 | 69304080 | 69400681 | 96602  | 7  | 2 | 2 | 0.0429175  | 0.08289318 | 4 | 3 | 0 | 0.30102999 |
| chr16 | 69400681 | 69400733 | 53     | 1  | 2 | 2 | 0.0429175  | 0.0429175  | 4 | 4 | 0 | 0.47744371 |
| chr16 | 69400733 | 69467146 | 66414  | 2  | 2 | 2 | 0.0429175  | 0.1575501  | 2 | 2 | 0 | 0.1575     |

|       |          |          |        |    |   |   |            |            |   |   |            |            |
|-------|----------|----------|--------|----|---|---|------------|------------|---|---|------------|------------|
| chr16 | 71100859 | 71196418 | 95560  | 3  | 2 | 2 | 0.0429175  | 0.02162467 | 4 | 5 | 0.47744371 | 0.68214471 |
| chr16 | 71196418 | 71196477 | 60     | 1  | 2 | 2 | 0.0429175  | 0.01053319 | 4 | 6 | 0.47744371 | 0.91219088 |
| chr16 | 71196477 | 71418747 | 222271 | 6  | 1 | 2 | 0.01091641 | 0.01053319 | 4 | 6 | 0.76005302 | 0.91219088 |
| chr16 | 71418747 | 71566694 | 147948 | 5  | 1 | 2 | 0.01091641 | 0.02162467 | 4 | 5 | 0.76005302 | 0.68214471 |
| chr16 | 71566694 | 71663112 | 96419  | 3  | 1 | 2 | 0.01091641 | 0.0429175  | 4 | 4 | 0.76005302 | 0.47744371 |
| chr16 | 71663112 | 71675049 | 11938  | 3  | 1 | 2 | 0.01091641 | 0.02162467 | 4 | 5 | 0.76005302 | 0.68214471 |
| chr16 | 71675049 | 71711486 | 36438  | 1  | 0 | 2 | 0          | 0.0429175  | 4 | 4 | 1.26272838 | 0.47744371 |
| chr16 | 71711486 | 71779180 | 67695  | 1  | 0 | 2 | 0          | 0.0429175  | 3 | 4 | 0.93173516 | 0.47744371 |
| chr16 | 71779180 | 71842785 | 63606  | 3  | 0 | 0 | 0          | 0.01091641 | 3 | 4 | 0.93173516 | 0.76005302 |
| chr16 | 71842785 | 71913790 | 71006  | 2  | 0 | 1 | 0          | 0.01091641 | 4 | 4 | 1.26272838 | 0.76005302 |
| chr16 | 71913790 | 71933390 | 19601  | 2  | 0 | 0 | 0          | 0.00478973 | 4 | 5 | 1.26272838 | 1.02643191 |
| chr16 | 71933390 | 72035792 | 102403 | 3  | 0 | 1 | 0          | 0.00204627 | 4 | 6 | 1.26272838 | 1.31360226 |
| chr16 | 72035792 | 72137043 | 101252 | 5  | 0 | 0 | 0          | 8.47E-04   | 7 | 7 | 1.26272838 | 1.62048027 |
| chr16 | 72137043 | 72184552 | 47510  | 2  | 0 | 1 | 0          | 0.00204627 | 4 | 6 | 1.26272838 | 1.31360226 |
| chr16 | 72184552 | 72184605 | 54     | 1  | 1 | 0 | 0          | 8.47E-04   | 4 | 7 | 1.26272838 | 1.62048027 |
| chr16 | 72184605 | 72255428 | 70824  | 2  | 0 | 1 | 0          | 0.00204627 | 4 | 6 | 1.26272838 | 1.31360226 |
| chr16 | 72255428 | 72335334 | 79907  | 1  | 0 | 0 | 0          | 0.00204627 | 3 | 6 | 0.93173516 | 1.31360226 |
| chr16 | 72335334 | 72403612 | 68279  | 1  | 0 | 1 | 0          | 0.00478973 | 3 | 5 | 0.93173516 | 1.02643191 |
| chr16 | 72403612 | 72499230 | 95560  | 2  | 0 | 0 | 0          | 0.00478973 | 4 | 6 | 1.26272838 | 1.02643191 |
| chr16 | 72499230 | 72499230 | 60     | 1  | 0 | 0 | 0          | 0.00204627 | 4 | 6 | 1.26272838 | 1.31360226 |
| chr16 | 72499230 | 72776614 | 277385 | 3  | 0 | 1 | 0          | 0.00478973 | 4 | 5 | 1.26272838 | 1.02643191 |
| chr16 | 72776614 | 72863722 | 87109  | 2  | 0 | 0 | 0          | 0          | 3 | 5 | 0.93173516 | 1.60515106 |
| chr16 | 72863722 | 72863778 | 57     | 1  | 0 | 1 | 0          | 0.00478973 | 3 | 3 | 0.93173516 | 1.02643191 |
| chr16 | 72863778 | 72935574 | 71797  | 2  | 0 | 0 | 0          | 0          | 3 | 5 | 0.93173516 | 1.60515106 |
| chr16 | 72935574 | 72992982 | 57409  | 2  | 0 | 0 | 0          | 0          | 2 | 5 | 0.61140001 | 1.60515106 |
| chr16 | 72992982 | 73012208 | 19227  | 2  | 0 | 0 | 0          | 0          | 3 | 5 | 0.93173516 | 1.60515106 |
| chr16 | 73012208 | 73182377 | 170170 | 4  | 0 | 0 | 0          | 0          | 2 | 5 | 0.61140001 | 1.60515106 |
| chr16 | 73182377 | 73317238 | 134862 | 1  | 0 | 0 | 0          | 0          | 2 | 3 | 0.61140001 | 0.93173516 |
| chr16 | 73317238 | 73402363 | 85126  | 1  | 0 | 0 | 0          | 0          | 2 | 2 | 0.61140001 | 0.61140001 |
| chr16 | 73402363 | 73402422 | 60     | 1  | 0 | 0 | 0          | 0          | 3 | 4 | 0.93173516 | 1.26272838 |
| chr16 | 73402422 | 73549652 | 147231 | 1  | 0 | 0 | 0          | 0          | 3 | 3 | 0.93173516 | 0.93173516 |
| chr16 | 73549652 | 73616266 | 66615  | 1  | 0 | 0 | 0          | 0          | 2 | 3 | 0.61140001 | 0.93173516 |
| chr16 | 73616266 | 73616325 | 60     | 1  | 0 | 0 | 0          | 0          | 3 | 4 | 0.93173516 | 1.26272838 |
| chr16 | 73616325 | 73705117 | 88793  | 1  | 0 | 0 | 0          | 0          | 2 | 4 | 0.61140001 | 1.26272838 |
| chr16 | 73705117 | 73792316 | 87200  | 2  | 0 | 0 | 0          | 0          | 2 | 5 | 0.61140001 | 1.60515106 |
| chr16 | 73792316 | 73792375 | 60     | 1  | 0 | 1 | 0          | 0.00478973 | 2 | 5 | 0.61140001 | 1.02643191 |
| chr16 | 73792375 | 73980954 | 188580 | 1  | 0 | 1 | 0          | 0.05404976 | 2 | 2 | 0.61140001 | 0.30102999 |
| chr16 | 73980954 | 74176768 | 195815 | 3  | 0 | 0 | 0          | 0.05404976 | 3 | 2 | 0.93173516 | 0.30102999 |
| chr16 | 74176768 | 74272815 | 96048  | 2  | 1 | 1 | 0.02438896 | 0.01091641 | 3 | 4 | 0.51676182 | 0.76005302 |
| chr16 | 74272815 | 74343759 | 70945  | 4  | 1 | 1 | 0.02438896 | 0.05404976 | 3 | 2 | 0.51676182 | 0.30102999 |
| chr16 | 74343759 | 74372285 | 28527  | 1  | 0 | 1 | 0          | 0.05404976 | 3 | 2 | 0.93173516 | 0.30102999 |
| chr16 | 74372285 | 74465077 | 92793  | 2  | 0 | 0 | 0          | 0.02438896 | 3 | 3 | 0.93173516 | 0.51676182 |
| chr16 | 74465077 | 74519665 | 54589  | 3  | 0 | 1 | 0          | 0.01091641 | 3 | 4 | 0.93173516 | 0.76005302 |
| chr16 | 74519665 | 74519724 | 60     | 1  | 1 | 1 | 0.02438896 | 0.01091641 | 3 | 4 | 0.51676182 | 0.76005302 |
| chr16 | 74519724 | 74591404 | 71681  | 1  | 0 | 1 | 0          | 0.01091641 | 4 | 4 | 0.93173516 | 0.76005302 |
| chr16 | 74591404 | 74616834 | 25431  | 2  | 0 | 0 | 0          | 0.00204627 | 6 | 6 | 0.93173516 | 1.31360226 |
| chr16 | 74616834 | 74657617 | 40784  | 2  | 0 | 1 | 0          | 0.00204627 | 6 | 6 | 0.61140001 | 1.31360226 |
| chr16 | 74657617 | 74706218 | 48602  | 2  | 0 | 2 | 0          | 0.01053319 | 2 | 6 | 0.61140001 | 0.91219088 |
| chr16 | 74706218 | 74747002 | 40785  | 3  | 0 | 2 | 0          | 0.00493743 | 2 | 7 | 0.61140001 | 1.16581773 |
| chr16 | 74747002 | 74822495 | 125494 | 4  | 0 | 2 | 0          | 0.00221948 | 8 | 8 | 0.61140001 | 1.44210395 |
| chr16 | 74822495 | 74938106 | 65612  | 3  | 0 | 2 | 0          | 0.00221948 | 8 | 8 | 0.93173516 | 1.44210395 |
| chr16 | 74938106 | 74966717 | 28612  | 1  | 0 | 2 | 0          | 0.00493743 | 3 | 7 | 0.93173516 | 1.16581773 |
| chr16 | 74966717 | 74966776 | 60     | 1  | 2 | 2 | 0.02438896 | 0.00493743 | 3 | 7 | 0.51676182 | 1.16581773 |
| chr16 | 74966776 | 75016306 | 49531  | 3  | 0 | 0 | 0          | 0.01053319 | 6 | 6 | 0.93173516 | 0.91219088 |
| chr16 | 75016306 | 75107790 | 91485  | 3  | 0 | 2 | 0          | 0.00493743 | 3 | 7 | 0.93173516 | 1.16581773 |
| chr16 | 75107790 | 75174953 | 67164  | 4  | 1 | 2 | 0.02438896 | 0.00493743 | 3 | 7 | 0.51676182 | 1.16581773 |
| chr16 | 75174953 | 75206054 | 31102  | 2  | 0 | 2 | 0          | 0.00493743 | 3 | 7 | 0.93173516 | 1.16581773 |
| chr16 | 75206054 | 75273211 | 67158  | 2  | 0 | 2 | 0          | 0.01053319 | 6 | 7 | 0.93173516 | 0.91219088 |
| chr16 | 75273211 | 75323433 | 50223  | 3  | 0 | 2 | 0          | 0.00493743 | 3 | 7 | 0.93173516 | 1.16581773 |
| chr16 | 75323433 | 75323492 | 60     | 1  | 1 | 2 | 0.02438896 | 0.00493743 | 3 | 7 | 0.51676182 | 1.16581773 |
| chr16 | 75323492 | 75567059 | 243568 | 8  | 0 | 0 | 0          | 0.00493743 | 3 | 7 | 0.93173516 | 1.16581773 |
| chr16 | 75567059 | 75604673 | 37615  | 1  | 0 | 2 | 0          | 0.00493743 | 2 | 7 | 0.61140001 | 1.16581773 |
| chr16 | 75604673 | 75633708 | 29036  | 2  | 1 | 2 | 0.05404976 | 0.00493743 | 2 | 7 | 0.30102999 | 1.16581773 |
| chr16 | 75633708 | 75651031 | 17324  | 1  | 0 | 2 | 0          | 0.00493743 | 2 | 7 | 0.61140001 | 1.16581773 |
| chr16 | 75651031 | 75654247 | 3217   | 2  | 0 | 2 | 0          | 0.00493743 | 3 | 7 | 0.93173516 | 1.16581773 |
| chr16 | 75654247 | 75732306 | 78060  | 5  | 0 | 2 | 0          | 0.00493743 | 2 | 7 | 0.61140001 | 1.16581773 |
| chr16 | 75732306 | 75850561 | 118256 | 2  | 0 | 2 | 0          | 0.00493743 | 3 | 7 | 0.93173516 | 1.16581773 |
| chr16 | 75850561 | 75960327 | 109767 | 2  | 0 | 2 | 0          | 0.01053319 | 2 | 6 | 0.61140001 | 0.91219088 |
| chr16 | 75960327 | 76055141 | 94815  | 1  | 0 | 2 | 0          | 0.01053319 | 1 | 6 | 0.30102999 | 0.91219088 |
| chr16 | 76055141 | 76161012 | 105872 | 1  | 0 | 1 | 0          | 0.00204627 | 1 | 6 | 0.30102999 | 1.31360226 |
| chr16 | 76161012 | 76295423 | 134412 | 3  | 0 | 2 | 0          | 0.00493743 | 1 | 7 | 0.30102999 | 1.16581773 |
| chr16 | 76295423 | 76295482 | 60     | 1  | 0 | 2 | 0          | 9.54E-04   | 9 | 9 | 0.30102999 | 1.74076927 |
| chr16 | 76295482 | 76443693 | 148212 | 3  | 0 | 2 | 0          | 0.00493743 | 1 | 7 | 0.30102999 | 1.16581773 |
| chr16 | 76443693 | 76579382 | 135690 | 4  | 0 | 2 | 0          | 0.00221948 | 1 | 8 | 0.30102999 | 1.44210395 |
| chr16 | 76579382 | 76615198 | 35817  | 1  | 0 | 2 | 0          | 0.00493743 | 1 | 7 | 0.30102999 | 1.16581773 |
| chr16 | 76615198 | 77014751 | 399554 | 3  | 0 | 2 | 0          | 0.02162467 | 1 | 5 | 0.30102999 | 0.68214471 |
| chr16 | 77014751 | 77225113 | 210363 | 4  | 0 | 2 | 0          | 0.01053319 | 1 | 6 | 0.30102999 | 0.91219088 |
| chr16 | 77225113 | 77465284 | 240172 | 5  | 0 | 2 | 0          | 0.01053319 | 2 | 6 | 0.61140001 | 0.91219088 |
| chr16 | 77465284 | 77647054 | 181771 | 2  | 0 | 0 | 0          | 0.00478973 | 2 | 5 | 0.61140001 | 1.02643191 |
| chr16 | 77647054 | 77723879 | 76826  | 2  | 0 | 2 | 0          | 0.02162467 | 2 | 5 | 0.61140001 | 0.68214471 |
| chr16 | 77723879 | 77789804 | 65926  | 2  | 0 | 2 | 0          | 0.01053319 | 2 | 6 | 0.61140001 | 0.91219088 |
| chr16 | 77789804 | 77918547 | 128744 | 2  | 0 | 1 | 0          | 0.00204627 | 6 | 6 | 0.61140001 | 1.31360226 |
| chr16 | 77918547 | 77950944 | 32398  | 2  | 0 | 2 | 0          | 0.00493743 | 2 | 7 | 0.61140001 | 1.16581773 |
| chr16 | 77950944 | 78064369 | 113426 | 3  | 0 | 2 | 0          | 0.01053319 | 6 | 6 | 0.61140001 | 0.91219088 |
| chr16 | 78064369 | 78064420 | 52     | 1  | 1 | 2 | 0.05404976 | 0.00493743 | 2 | 6 | 0.30102999 | 1.16581773 |
| chr16 | 78064420 | 78724611 | 660192 | 13 | 1 | 2 | 0.05404976 | 0.01053319 | 2 | 6 | 0.30102999 | 0.91219088 |
| chr16 | 78724611 | 78914668 | 190058 | 4  | 1 | 2 | 0.05404976 | 0.00493743 | 2 | 7 | 0.30102999 | 1.16581773 |
| chr16 | 78914668 | 78914727 | 60     | 1  | 1 | 2 | 0.05404976 | 0.00221948 | 8 | 8 | 0.30102999 | 1.44210395 |
| chr16 | 78914727 | 78970723 | 55997  | 1  | 1 | 2 | 0.1218695  | 0.00493743 | 1 | 7 | 0.1218695  | 1.16581773 |
| chr16 | 78970723 | 79015710 | 44988  | 1  | 1 | 2 | 0.1218695  | 0.01053319 | 1 | 6 | 0.1218695  | 0.91219088 |
| chr16 | 79015710 | 79056410 | 40701  | 3  | 1 | 2 | 0.1218695  | 0.00493743 | 1 | 7 | 0.1218695  | 1.16581773 |
| chr16 | 79056410 | 79188037 | 131628 | 4  | 1 | 2 | 0.1218695  | 0.00221948 | 8 | 8 | 0.1218695  | 1.44210395 |
| chr16 | 79188037 | 79352616 | 164580 | 3  | 1 | 2 | 0.1218695  | 0.00493743 | 7 | 7 | 0.1218695  | 1.16581773 |
| chr16 | 79352616 | 79562627 | 210012 | 2  | 1 | 2 | 0.1218695  | 0.01053319 | 1 | 6 | 0.1218695  | 0.91219088 |
| chr16 | 79562627 | 79741267 | 178641 | 6  | 1 | 2 | 0.         |            |   |   |            |            |

|       |          |          |        |    |   |            |            |            |   |            |            |            |
|-------|----------|----------|--------|----|---|------------|------------|------------|---|------------|------------|------------|
| chr16 | 82215973 | 82314230 | 98258  | 1  | 2 | 1          | 0.30102999 | 0.01091641 | 1 | 4          | 0.05404976 | 0.76005302 |
| chr16 | 82314230 | 82314289 | 60     | 1  | 2 | 2          | 0.30102999 | 0.02162467 | 1 | 5          | 0.05404976 | 0.68214471 |
| chr16 | 82314289 | 82450211 | 135923 | 1  | 2 | 1          | 0.30102999 | 0.01091641 | 1 | 4          | 0.05404976 | 0.76005302 |
| chr16 | 82450211 | 82450270 | 60     | 1  | 3 | 1          | 0.17593012 | 0.01091641 | 3 | 4          | 0.17593012 | 0.76005302 |
| chr16 | 82450270 | 82563550 | 113281 | 1  | 2 | 1          | 0.1575501  | 0.02438896 | 2 | 3          | 0.1575501  | 0.51676182 |
| chr16 | 82563550 | 82685994 | 122445 | 2  | 2 | 1          | 0.1575501  | 0.01091641 | 2 | 4          | 0.1575501  | 0.76005302 |
| chr16 | 82685994 | 82686053 | 60     | 1  | 3 | 2          | 0.30102999 | 0.0429175  | 2 | 4          | 0.08289318 | 0.47744371 |
| chr16 | 82686053 | 82738674 | 52622  | 1  | 3 | 2          | 0.51676182 | 0.0429175  | 1 | 4          | 0.02438896 | 0.47744371 |
| chr16 | 82738674 | 82738733 | 60     | 1  | 3 | 4          | 0.51676182 | 0.18734596 | 1 | 4          | 0.02438896 | 0.18734596 |
| chr16 | 82738733 | 82816260 | 77528  | 1  | 3 | 3          | 0.51676182 | 0.10122019 | 1 | 4          | 0.02438896 | 0.30102999 |
| chr16 | 82816260 | 82892105 | 75846  | 2  | 3 | 3          | 0.51676182 | 0.05670724 | 1 | 5          | 0.02438896 | 0.45545077 |
| chr16 | 82892105 | 83061853 | 169749 | 3  | 2 | 3          | 0.30102999 | 0.05670724 | 1 | 5          | 0.05404976 | 0.45545077 |
| chr16 | 83061853 | 83125002 | 63150  | 2  | 2 | 3          | 0.30102999 | 0.03070643 | 1 | 6          | 0.05404976 | 0.63695542 |
| chr16 | 83125002 | 83159043 | 34042  | 2  | 2 | 3          | 0.30102999 | 0.0079614  | 1 | 8          | 0.05404976 | 1.07548421 |
| chr16 | 83159043 | 83189921 | 30879  | 1  | 2 | 3          | 0.30102999 | 0.03070643 | 1 | 6          | 0.05404976 | 0.63695542 |
| chr16 | 83189921 | 83189980 | 60     | 1  | 2 | 3          | 0.30102999 | 0.01598258 | 1 | 7          | 0.05404976 | 0.84395715 |
| chr16 | 83189980 | 83258080 | 68101  | 1  | 2 | 3          | 0.30102999 | 0.03070643 | 1 | 6          | 0.05404976 | 0.63695542 |
| chr16 | 83258080 | 83289026 | 30947  | 2  | 2 | 3          | 0.30102999 | 0.0079614  | 1 | 8          | 0.05404976 | 1.07548421 |
| chr16 | 83289026 | 83289085 | 60     | 1  | 2 | 3          | 0.30102999 | 0.00378107 | 1 | 9          | 0.05404976 | 1.3311237  |
| chr16 | 83289085 | 83432724 | 143640 | 3  | 2 | 3          | 0.30102999 | 0.0079614  | 1 | 8          | 0.05404976 | 1.07548421 |
| chr16 | 83432724 | 83531662 | 98939  | 2  | 2 | 2          | 0.30102999 | 0.00493743 | 1 | 7          | 0.05404976 | 1.16581773 |
| chr16 | 83531662 | 83594908 | 67837  | 2  | 2 | 2          | 0.30102999 | 0.00221948 | 1 | 8          | 0.05404976 | 1.44210395 |
| chr16 | 83594908 | 83763748 | 164251 | 5  | 2 | 3          | 0.30102999 | 0.0079614  | 1 | 8          | 0.05404976 | 1.07548421 |
| chr16 | 83763748 | 83945839 | 182092 | 4  | 2 | 2          | 0.30102999 | 0.00221948 | 1 | 8          | 0.05404976 | 1.44210395 |
| chr16 | 83945839 | 84097068 | 151230 | 3  | 2 | 2          | 0.51676182 | 0.00221948 | 1 | 8          | 0.02438896 | 1.44210395 |
| chr16 | 84097068 | 84468513 | 371446 | 12 | 3 | 2          | 0.51676182 | 0.00493743 | 1 | 7          | 0.02438896 | 1.16581773 |
| chr16 | 84468513 | 84571125 | 102613 | 3  | 2 | 2          | 0.51676182 | 0.01053319 | 1 | 6          | 0.02438896 | 0.91219088 |
| chr16 | 84571125 | 84634567 | 63443  | 2  | 2 | 3          | 0.30102999 | 0.01053319 | 2 | 6          | 0.08289318 | 0.91219088 |
| chr16 | 84634567 | 84684618 | 50052  | 1  | 3 | 2          | 0.30102999 | 0.02162467 | 2 | 5          | 0.08289318 | 0.68214471 |
| chr16 | 84684618 | 84931157 | 246540 | 7  | 3 | 1          | 0.30102999 | 0.00478973 | 2 | 5          | 0.08289318 | 1.02643191 |
| chr16 | 84931157 | 85141553 | 210397 | 7  | 3 | 1          | 0.51676182 | 0.00478973 | 1 | 5          | 0.02438896 | 1.02643191 |
| chr16 | 85141553 | 85256582 | 115030 | 1  | 3 | 1          | 0.93173516 | 0.00478973 | 0 | 5          | 0          | 1.02643191 |
| chr16 | 85256582 | 85256641 | 60     | 1  | 3 | 1          | 0.93173516 | 0.00204627 | 0 | 6          | 0          | 1.31360226 |
| chr16 | 85256641 | 85410640 | 154000 | 3  | 1 | 0.93173516 | 0.00478973 | 0          | 5 | 0          | 1.02643191 |            |
| chr16 | 85410640 | 85465801 | 55162  | 2  | 4 | 1          | 1.26272838 | 0.00478973 | 0 | 5          | 0          | 1.02643191 |
| chr16 | 85465801 | 85508509 | 42709  | 1  | 3 | 1          | 0.93173516 | 0.00478973 | 0 | 5          | 0          | 1.02643191 |
| chr16 | 85508509 | 85719697 | 211189 | 5  | 3 | 1          | 0.93173516 | 0.01091641 | 0 | 4          | 0          | 0.76005302 |
| chr16 | 85719697 | 85776849 | 57153  | 2  | 3 | 1          | 0.93173516 | 0.02438896 | 0 | 3          | 0          | 0.51676182 |
| chr16 | 85776849 | 85839047 | 62199  | 4  | 3 | 1          | 0.93173516 | 0.01091641 | 0 | 4          | 0          | 0.76005302 |
| chr16 | 85839047 | 85942729 | 103683 | 2  | 3 | 1          | 0.93173516 | 0.02438896 | 0 | 3          | 0          | 0.51676182 |
| chr16 | 85942729 | 85950943 | 8215   | 2  | 3 | 1          | 0.93173516 | 0.01091641 | 0 | 4          | 0          | 0.76005302 |
| chr16 | 85950943 | 86053006 | 102064 | 1  | 2 | 1          | 0.61140001 | 0.01091641 | 0 | 4          | 0          | 0.76005302 |
| chr16 | 86053006 | 86053065 | 60     | 1  | 2 | 1          | 0.61140001 | 0.00204627 | 0 | 6          | 0          | 1.31360226 |
| chr16 | 86053065 | 86304983 | 251919 | 3  | 2 | 1          | 0.61140001 | 0.01091641 | 0 | 4          | 0          | 0.76005302 |
| chr16 | 86304983 | 86305042 | 60     | 1  | 3 | 1          | 0.93173516 | 0.01091641 | 0 | 4          | 0          | 0.76005302 |
| chr16 | 86305042 | 86394827 | 89786  | 2  | 3 | 1          | 0.93173516 | 0.05404976 | 0 | 2          | 0          | 0.30102999 |
| chr16 | 86394827 | 86394886 | 60     | 1  | 3 | 1          | 0.93173516 | 0.00478973 | 0 | 5          | 0          | 1.02643191 |
| chr16 | 86394886 | 86473051 | 78166  | 1  | 2 | 1          | 0.61140001 | 0.05404976 | 0 | 2          | 0          | 0.30102999 |
| chr16 | 86473051 | 86545322 | 72272  | 2  | 2 | 1          | 0.61140001 | 0.01091641 | 0 | 4          | 0          | 0.76005302 |
| chr16 | 86545322 | 86686352 | 141031 | 7  | 2 | 1          | 0.61140001 | 0.00478973 | 0 | 4          | 0          | 1.02643191 |
| chr16 | 86686352 | 86743412 | 57061  | 2  | 2 | 2          | 0.61140001 | 0.01053319 | 0 | 6          | 0          | 0.91219088 |
| chr16 | 86743412 | 86743471 | 60     | 1  | 2 | 2          | 0.61140001 | 0.00493743 | 0 | 7          | 0          | 1.16581773 |
| chr16 | 86743471 | 86936528 | 193058 | 2  | 2 | 1          | 0.61140001 | 0.00204627 | 0 | 6          | 0          | 1.31360226 |
| chr16 | 86936528 | 86936587 | 60     | 1  | 2 | 1          | 0.61140001 | 8.47E-04   | 0 | 7          | 0          | 1.62048027 |
| chr16 | 86936587 | 87083448 | 146862 | 2  | 2 | 1          | 0.61140001 | 0.00204627 | 0 | 6          | 0          | 1.31360226 |
| chr16 | 87083448 | 87340194 | 256747 | 5  | 2 | 1          | 0.61140001 | 8.47E-04   | 0 | 7          | 0          | 1.62048027 |
| chr16 | 87340194 | 87539375 | 199182 | 11 | 2 | 1          | 0.61140001 | 0.00204627 | 0 | 6          | 0          | 1.31360226 |
| chr16 | 87539375 | 87539434 | 60     | 1  | 2 | 1          | 0.61140001 | 8.47E-04   | 0 | 7          | 0          | 1.62048027 |
| chr16 | 87539434 | 87637775 | 98342  | 2  | 2 | 1          | 0.61140001 | 0.00204627 | 0 | 6          | 0          | 1.31360226 |
| chr16 | 87637775 | 87637824 | 50     | 1  | 1 | 0.51676182 | 0.00204627 | 1          | 6 | 0.02438896 | 1.31360226 |            |
| chr16 | 87637824 | 87709952 | 71219  | 1  | 2 | 1          | 0.30102999 | 0.00204627 | 0 | 6          | 0.05404976 | 1.31360226 |
| chr16 | 87709952 | 87789595 | 79644  | 3  | 2 | 1          | 0.30102999 | 8.47E-04   | 0 | 7          | 0.05404976 | 1.62048027 |
| chr16 | 87789595 | 87874033 | 84439  | 3  | 3 | 1          | 0.51676182 | 3.39E-04   | 1 | 8          | 0.02438896 | 1.94674965 |
| chr16 | 87874033 | 88320961 | 356929 | 7  | 3 | 1          | 0.51676182 | 1.30E-04   | 1 | 9          | 0.02438896 | 2.29264207 |
| chr16 | 88320961 | 88336035 | 105075 | 2  | 3 | 2          | 0.51676182 | 9.54E-04   | 1 | 9          | 0.02438896 | 1.74076927 |
| chr16 | 88336035 | 88473369 | 137325 | 1  | 3 | 2          | 0.51676182 | 3.39E-04   | 1 | 8          | 0.02438896 | 1.94674965 |
| chr16 | 88473369 | 88473428 | 60     | 1  | 3 | 1          | 0.91219088 | 0.00221948 | 2 | 2          | 0.01053319 | 1.44210395 |
| chr16 | 88473428 | 88544159 | 70732  | 3  | 6 | 1          | 0.91219088 | 3.39E-04   | 2 | 2          | 0.01053319 | 1.94674965 |
| chr16 | 88544159 | 88590554 | 46396  | 2  | 2 | 6          | 0.91219088 | 0.00221948 | 2 | 8          | 0.01053319 | 1.44210395 |
| chr16 | 88590554 | 88590613 | 60     | 1  | 2 | 2          | 0.91219088 | 9.54E-04   | 1 | 2          | 0.01053319 | 1.74076927 |
| chr16 | 88590613 | 88635000 | 44388  | 1  | 6 | 2          | 0.91219088 | 0.00221948 | 2 | 2          | 0.01053319 | 1.44210395 |
| chr16 | 88635000 | 88710597 | 75598  | 7  | 6 | 3          | 0.91219088 | 0.0079614  | 2 | 8          | 0.01053319 | 1.07548421 |
| chr16 | 88710597 | 88809983 | 99387  | 6  | 7 | 3          | 1.16581773 | 0.0079614  | 2 | 8          | 0.00493743 | 1.07548421 |
| chr16 | 88809983 | 89145482 | 335500 | 11 | 7 | 3          | 1.16581773 | 0.00378107 | 2 | 9          | 0.00493743 | 1.3311237  |
| chr16 | 89145482 | 89145541 | 60     | 1  | 7 | 3          | 1.16581773 | 0.00170589 | 2 | 10         | 0.00493743 | 1.61091023 |
| chr16 | 89145541 | 89230060 | 84520  | 5  | 7 | 3          | 1.16581773 | 0.00378107 | 2 | 9          | 0.00493743 | 1.3311237  |
| chr16 | 89230060 | 89285544 | 55485  | 2  | 7 | 3          | 1.16581773 | 0.0079614  | 2 | 8          | 0.00493743 | 1.07548421 |
| chr16 | 89285544 | 89785433 | 499890 | 22 | 7 | 3          | 1.16581773 | 0.00378107 | 2 | 9          | 0.00493743 | 1.3311237  |
| chr16 | 89785433 | 89804070 | 18638  | 4  | 3 | 2          | 1.44210395 | 0.00378107 | 2 | 9          | 0.00221948 | 1.3311237  |
| chr16 | 89804070 | 89869764 | 65695  | 3  | 8 | 3          | 1.44210395 | 0.01598258 | 2 | 7          | 0.00221948 | 0.84395715 |
| chr16 | 89869764 | 89877115 | 7352   | 1  | 7 | 3          | 1.16581773 | 0.01598258 | 2 | 7          | 0.00493743 | 0.84395715 |
| chr16 | 89877115 | 89909360 | 32246  | 3  | 7 | 3          | 1.16581773 | 0.0079614  | 2 | 8          | 0.00493743 | 1.07548421 |
| chr16 | 89909360 | 89909419 | 60     | 1  | 8 | 3          | 1.44210395 | 0.0079614  | 2 | 8          | 0.00221948 | 1.07548421 |
| chr16 | 89909419 | 89977030 | 67612  | 3  | 6 | 3          | 0.91219088 | 0.03070643 | 2 | 6          | 0.01053319 | 0.63695542 |
| chr16 | 89977030 | 90045308 | 68279  | 6  | 6 | 2          | 0.91219088 | 0.01053319 | 2 | 6          | 0.01053319 | 0.91219088 |
| chr16 | 90045308 | 90111263 | 65956  | 4  | 5 | 1          | 0.68214471 | 0.00204627 | 2 | 6          | 0.02162467 | 1.31360226 |
| chr17 | 87009    | 210970   | 123962 | 3  | 0 | 2          | 0.1575501  | 0.30102999 | 1 | 2          | 0.1575501  | 0.51676182 |
| chr17 | 210970   | 264204   | 53235  | 2  | 0 | 2          | 0          | 0.08289318 | 1 | 3          | 0.30102999 | 0.30102999 |
| chr17 | 264204   | 399280   | 135077 | 2  | 0 | 2          | 0          | 0.10122019 | 2 | 4          | 0.61140001 | 0.30102999 |
| chr17 | 399280   | 433983   | 34704  | 2  | 0 | 3          | 0          | 0.10122019 | 3 | 4          | 0.93173516 | 0.30102999 |
| chr17 | 433983   | 490921   | 56939  | 2  | 0 | 3          | 0          | 0.05670724 | 3 | 5          | 0.93173516 | 0.45545077 |
| chr17 | 490921   | 490980   | 60     | 1  | 0 | 4          | 0          | 0.11390336 | 3 |            |            |            |

|       |         |         |        |    |   |    |   |            |   |    |            |            |
|-------|---------|---------|--------|----|---|----|---|------------|---|----|------------|------------|
| chr17 | 1965674 | 2016700 | 51027  | 4  | 0 | 8  | 0 | 0.13872638 | 3 | 9  | 0.93173516 | 0.30102999 |
| chr17 | 2016700 | 2157982 | 141283 | 4  | 0 | 9  | 0 | 0.20975986 | 3 | 9  | 0.93173516 | 0.20975986 |
| chr17 | 2157982 | 2186565 | 28584  | 1  | 0 | 8  | 0 | 0.13872638 | 2 | 9  | 0.61140001 | 0.30102999 |
| chr17 | 2186565 | 2218977 | 32413  | 2  | 0 | 8  | 0 | 0.08923391 | 2 | 10 | 0.61140001 | 0.4167287  |
| chr17 | 2218977 | 2250725 | 31749  | 4  | 0 | 8  | 0 | 0.08923391 | 3 | 10 | 0.93173516 | 0.4167287  |
| chr17 | 2250725 | 2322673 | 71949  | 5  | 0 | 8  | 0 | 0.08923391 | 4 | 10 | 1.26272838 | 0.4167287  |
| chr17 | 2322673 | 2414600 | 91928  | 2  | 0 | 6  | 0 | 0.02793176 | 4 | 10 | 1.26272838 | 0.74627054 |
| chr17 | 2414600 | 2468384 | 53785  | 2  | 0 | 8  | 0 | 0.08923391 | 4 | 10 | 1.26272838 | 0.4167287  |
| chr17 | 2468384 | 2512241 | 43858  | 1  | 0 | 7  | 0 | 0.05232577 | 4 | 10 | 1.26272838 | 0.56314362 |
| chr17 | 2512241 | 2537791 | 25551  | 2  | 0 | 8  | 0 | 0.08923391 | 4 | 10 | 1.26272838 | 0.4167287  |
| chr17 | 2537791 | 2575922 | 38132  | 2  | 0 | 8  | 0 | 0.14135546 | 4 | 10 | 1.26272838 | 0.30102999 |
| chr17 | 2575922 | 2575981 | 60     | 1  | 0 | 11 | 0 | 0.30102999 | 4 | 10 | 1.26272838 | 0.14303407 |
| chr17 | 2575981 | 2650266 | 74286  | 3  | 0 | 8  | 0 | 0.30102999 | 4 | 9  | 1.26272838 | 0.14135546 |
| chr17 | 2650266 | 2650325 | 60     | 1  | 0 | 10 | 0 | 0.21118145 | 4 | 10 | 1.26272838 | 0.21118145 |
| chr17 | 2650325 | 2886015 | 235691 | 5  | 0 | 8  | 0 | 0.08923391 | 4 | 10 | 1.26272838 | 0.4167287  |
| chr17 | 2886015 | 2940023 | 54009  | 2  | 0 | 8  | 0 | 0.08923391 | 3 | 10 | 0.93173516 | 0.4167287  |
| chr17 | 2940023 | 2940082 | 60     | 1  | 0 | 8  | 0 | 0.08923391 | 4 | 10 | 1.26272838 | 0.4167287  |
| chr17 | 2940082 | 3118873 | 178792 | 4  | 0 | 8  | 0 | 0.08923391 | 3 | 10 | 0.93173516 | 0.4167287  |
| chr17 | 3118873 | 3183866 | 64994  | 1  | 0 | 8  | 0 | 0.08923391 | 2 | 10 | 0.61140001 | 0.4167287  |
| chr17 | 3183866 | 3195070 | 11205  | 2  | 0 | 9  | 0 | 0.14135546 | 2 | 10 | 0.61140001 | 0.30102999 |
| chr17 | 3195070 | 3195127 | 58     | 1  | 0 | 8  | 0 | 0.21118145 | 2 | 10 | 0.61140001 | 0.21118145 |
| chr17 | 3195127 | 3246946 | 51820  | 1  | 0 | 9  | 0 | 0.14135546 | 2 | 10 | 0.61140001 | 0.30102999 |
| chr17 | 3246946 | 3322579 | 75634  | 1  | 0 | 9  | 0 | 0.20975986 | 2 | 9  | 0.61140001 | 0.20975986 |
| chr17 | 3322579 | 3322638 | 60     | 1  | 0 | 9  | 0 | 0.20975986 | 4 | 9  | 1.26272838 | 0.20975986 |
| chr17 | 3322638 | 3365791 | 43154  | 2  | 0 | 9  | 0 | 0.20975986 | 2 | 9  | 0.61140001 | 0.20975986 |
| chr17 | 3365791 | 3379459 | 13669  | 2  | 0 | 9  | 0 | 0.20975986 | 3 | 9  | 0.93173516 | 0.20975986 |
| chr17 | 3379459 | 3519958 | 140500 | 5  | 0 | 8  | 0 | 0.13872638 | 3 | 9  | 0.93173516 | 0.30102999 |
| chr17 | 3519958 | 3572711 | 52754  | 4  | 0 | 8  | 0 | 0.13872638 | 4 | 9  | 1.26272838 | 0.30102999 |
| chr17 | 3572711 | 3587961 | 15251  | 1  | 0 | 8  | 0 | 0.20746544 | 4 | 8  | 1.26272838 | 0.20746544 |
| chr17 | 3587961 | 3629443 | 41483  | 1  | 0 | 7  | 0 | 0.13499366 | 2 | 8  | 0.61140001 | 0.30102999 |
| chr17 | 3629443 | 3727893 | 98451  | 5  | 0 | 7  | 0 | 0.08584816 | 2 | 9  | 0.61140001 | 0.42015402 |
| chr17 | 3727893 | 3803773 | 75881  | 3  | 0 | 7  | 0 | 0.08584816 | 3 | 9  | 0.93173516 | 0.42015402 |
| chr17 | 3803773 | 3803832 | 60     | 1  | 0 | 8  | 0 | 0.05490675 | 3 | 11 | 0.93173516 | 0.55623409 |
| chr17 | 3803832 | 3882071 | 78240  | 2  | 0 | 8  | 0 | 0.08923391 | 3 | 10 | 0.93173516 | 0.4167287  |
| chr17 | 3882071 | 3911853 | 29783  | 2  | 0 | 8  | 0 | 0.05490675 | 3 | 11 | 0.93173516 | 0.55623409 |
| chr17 | 3911853 | 3925821 | 13969  | 2  | 0 | 9  | 0 | 0.09154957 | 3 | 11 | 0.93173516 | 0.41444892 |
| chr17 | 3925821 | 4098401 | 172221 | 4  | 0 | 8  | 0 | 0.05490675 | 3 | 11 | 0.93173516 | 0.55623409 |
| chr17 | 4098401 | 4098100 | 60     | 1  | 0 | 9  | 0 | 0.09154957 | 3 | 11 | 0.93173516 | 0.41444892 |
| chr17 | 4098100 | 4192663 | 94564  | 2  | 0 | 8  | 0 | 0.05490675 | 3 | 11 | 0.93173516 | 0.55623409 |
| chr17 | 4192663 | 4192722 | 60     | 1  | 0 | 9  | 0 | 0.09154957 | 3 | 11 | 0.93173516 | 0.41444892 |
| chr17 | 4192722 | 4254776 | 62055  | 2  | 0 | 8  | 0 | 0.05490675 | 3 | 11 | 0.93173516 | 0.55623409 |
| chr17 | 4254776 | 4301427 | 46652  | 1  | 0 | 8  | 0 | 0.08923391 | 3 | 10 | 0.93173516 | 0.4167287  |
| chr17 | 4301427 | 4387305 | 85879  | 2  | 0 | 7  | 0 | 0.05232577 | 3 | 10 | 0.93173516 | 0.56314362 |
| chr17 | 4387305 | 4442248 | 54944  | 2  | 0 | 7  | 0 | 0.03037338 | 3 | 11 | 0.93173516 | 0.73110763 |
| chr17 | 4442248 | 4446572 | 4325   | 2  | 0 | 7  | 0 | 0.01667721 | 3 | 12 | 0.93173516 | 0.92532268 |
| chr17 | 4446572 | 4463172 | 16601  | 1  | 0 | 7  | 0 | 0.08584816 | 3 | 9  | 0.93173516 | 0.42015402 |
| chr17 | 4463172 | 4537516 | 74345  | 1  | 0 | 7  | 0 | 0.08584816 | 2 | 9  | 0.61140001 | 0.42015402 |
| chr17 | 4537516 | 4574665 | 37150  | 2  | 0 | 7  | 0 | 0.03037338 | 2 | 11 | 0.61140001 | 0.73110763 |
| chr17 | 4574665 | 4574718 | 54     | 1  | 0 | 7  | 0 | 0.03037338 | 3 | 11 | 0.93173516 | 0.73110763 |
| chr17 | 4574718 | 4615529 | 40812  | 2  | 0 | 7  | 0 | 0.05232577 | 2 | 10 | 0.61140001 | 0.56314362 |
| chr17 | 4615529 | 4911141 | 295613 | 23 | 0 | 7  | 0 | 0.03037338 | 2 | 11 | 0.61140001 | 0.73110763 |
| chr17 | 4911141 | 4935987 | 24847  | 1  | 0 | 7  | 0 | 0.05232577 | 2 | 10 | 0.61140001 | 0.56314362 |
| chr17 | 4935987 | 4936039 | 53     | 1  | 0 | 7  | 0 | 0.03037338 | 2 | 11 | 0.61140001 | 0.73110763 |
| chr17 | 4936039 | 4996341 | 60303  | 1  | 0 | 7  | 0 | 0.05232577 | 2 | 10 | 0.61140001 | 0.56314362 |
| chr17 | 4996341 | 5186897 | 190557 | 6  | 0 | 7  | 0 | 0.03037338 | 2 | 11 | 0.61140001 | 0.73110763 |
| chr17 | 5186897 | 5235415 | 48519  | 2  | 0 | 7  | 0 | 0.05232577 | 2 | 10 | 0.61140001 | 0.56314362 |
| chr17 | 5235415 | 5364469 | 129055 | 8  | 0 | 7  | 0 | 0.03037338 | 2 | 11 | 0.61140001 | 0.73110763 |
| chr17 | 5364469 | 5441311 | 76843  | 5  | 0 | 7  | 0 | 0.05232577 | 2 | 10 | 0.61140001 | 0.56314362 |
| chr17 | 5441311 | 5462042 | 20732  | 2  | 0 | 7  | 0 | 0.05232577 | 3 | 10 | 0.93173516 | 0.56314362 |
| chr17 | 5462042 | 5462101 | 60     | 1  | 0 | 7  | 0 | 0.03037338 | 3 | 11 | 0.93173516 | 0.73110763 |
| chr17 | 5462101 | 5816257 | 354157 | 6  | 0 | 7  | 0 | 0.03037338 | 2 | 11 | 0.61140001 | 0.73110763 |
| chr17 | 5816257 | 5992769 | 176513 | 2  | 0 | 6  | 0 | 0.01518174 | 2 | 11 | 0.61140001 | 0.9449689  |
| chr17 | 5992769 | 5992828 | 60     | 1  | 0 | 8  | 0 | 0.05490675 | 2 | 11 | 0.61140001 | 0.55623409 |
| chr17 | 5992828 | 6045993 | 53163  | 2  | 0 | 8  | 0 | 0.05490675 | 1 | 11 | 0.30102999 | 0.55623409 |
| chr17 | 6045993 | 6140933 | 94944  | 1  | 0 | 7  | 0 | 0.03037338 | 1 | 11 | 0.30102999 | 0.73110763 |
| chr17 | 6140933 | 6244703 | 103771 | 2  | 0 | 7  | 0 | 0.01667721 | 1 | 12 | 0.30102999 | 0.92532268 |
| chr17 | 6244703 | 6244762 | 60     | 1  | 0 | 8  | 0 | 0.00432398 | 2 | 15 | 0.61140001 | 1.3873209  |
| chr17 | 6244762 | 6336546 | 91785  | 1  | 0 | 8  | 0 | 0.03209037 | 2 | 12 | 0.61140001 | 0.72109894 |
| chr17 | 6336546 | 6354352 | 17807  | 2  | 0 | 7  | 0 | 0.01667721 | 2 | 12 | 0.61140001 | 0.92532268 |
| chr17 | 6354352 | 6482088 | 127737 | 5  | 0 | 8  | 0 | 0.03209037 | 2 | 12 | 0.61140001 | 0.72109894 |
| chr17 | 6482088 | 6498350 | 16263  | 2  | 0 | 8  | 0 | 0.00909834 | 2 | 14 | 0.61140001 | 1.13428373 |
| chr17 | 6498350 | 6592157 | 93808  | 4  | 0 | 8  | 0 | 0.01767679 | 2 | 13 | 0.61140001 | 0.91308053 |
| chr17 | 6592157 | 6613091 | 20935  | 2  | 0 | 8  | 0 | 0.00909834 | 2 | 14 | 0.61140001 | 1.13428373 |
| chr17 | 6613091 | 7293012 | 679922 | 31 | 0 | 8  | 0 | 0.01767679 | 2 | 13 | 0.61140001 | 0.91308053 |
| chr17 | 7293012 | 7306568 | 13557  | 4  | 0 | 8  | 0 | 0.00909834 | 2 | 14 | 0.61140001 | 1.13428373 |
| chr17 | 7306568 | 7339377 | 32810  | 4  | 0 | 8  | 0 | 0.01767679 | 2 | 13 | 0.61140001 | 0.91308053 |
| chr17 | 7339377 | 7343333 | 3957   | 2  | 0 | 8  | 0 | 0.00909834 | 2 | 14 | 0.61140001 | 1.13428373 |
| chr17 | 7343333 | 7387477 | 44145  | 3  | 0 | 8  | 0 | 0.01767679 | 2 | 13 | 0.61140001 | 0.91308053 |
| chr17 | 7387477 | 7489774 | 102298 | 7  | 0 | 9  | 0 | 0.0331093  | 2 | 13 | 0.61140001 | 0.71538971 |
| chr17 | 7489774 | 7494438 | 4665   | 4  | 0 | 9  | 0 | 0.01817691 | 2 | 14 | 0.61140001 | 0.90719478 |
| chr17 | 7494438 | 7529539 | 35102  | 2  | 0 | 9  | 0 | 0.0331093  | 2 | 13 | 0.61140001 | 0.71538971 |
| chr17 | 7529539 | 7530129 | 591    | 2  | 0 | 9  | 0 | 0.01817691 | 2 | 14 | 0.61140001 | 0.90719478 |
| chr17 | 7530129 | 7576822 | 46694  | 5  | 0 | 9  | 0 | 0.0331093  | 2 | 13 | 0.61140001 | 0.71538971 |
| chr17 | 7576822 | 7614115 | 37294  | 4  | 0 | 8  | 0 | 0.01767679 | 2 | 13 | 0.61140001 | 0.91308053 |
| chr17 | 7614115 | 7614174 | 60     | 1  | 0 | 9  | 0 | 0.0331093  | 2 | 13 | 0.61140001 | 0.71538971 |
| chr17 | 7614174 | 7729061 | 114888 | 2  | 0 | 8  | 0 | 0.01767679 | 2 | 13 | 0.61140001 | 0.91308053 |
| chr17 | 7729061 | 7759982 | 30922  | 1  | 0 | 8  | 0 | 0.03209037 | 2 | 12 | 0.61140001 | 0.72109894 |
| chr17 | 7759982 | 7761035 | 1054   | 2  | 0 | 9  | 0 | 0.0565833  | 2 | 12 | 0.61140001 | 0.55190077 |
| chr17 | 7761035 | 7807735 | 46701  | 4  | 0 | 9  | 0 | 0.0331093  | 2 | 13 | 0.61140001 | 0.71538971 |
| chr17 | 7807735 | 7807789 | 55     | 1  | 0 | 9  | 0 | 0.01817691 | 2 | 14 | 0.61140001 | 0.90719478 |
| chr17 | 7807789 | 7834083 | 26295  | 2  | 0 | 9  | 0 | 0.0331093  | 2 | 13 | 0.61140001 | 0.71538971 |
| chr17 | 7834083 | 7915276 | 81194  | 5  | 0 | 10 | 0 | 0.0574087  | 2 | 13 | 0.61140001 | 0.5498089  |
| chr17 | 7915276 | 8025991 | 110716 | 3  | 0 | 9  | 0 | 0.0331093  | 2 | 13 | 0.61140001 | 0.71538971 |
| chr17 | 8025991 | 8111359 | 85369  | 7  | 0 | 10 | 0 | 0.0574087  | 2 | 13 | 0.61140001 | 0.5498089  |
| chr17 | 8111359 | 8173113 | 61755  | 6  | 0 | 8  | 0 | 0.01767679 | 2 | 13 | 0.61140001 | 0.91308053 |
| chr17 | 8173113 | 8216038 | 42926  | 3  | 0 | 7  | 0 | 0.00859896 | 3 | 13 | 0.61140001 | 1.14735594 |
| chr17 | 8216038 | 8274697 |        |    |   |    |   |            |   |    |            |            |

|       |          |          |        |    |   |   |            |            |   |    |            |            |
|-------|----------|----------|--------|----|---|---|------------|------------|---|----|------------|------------|
| chr17 | 9806873  | 9828307  | 21435  | 1  | 0 | 7 | 0          | 0.08584816 | 1 | 9  | 0.30102999 | 0.42015402 |
| chr17 | 9828307  | 9836571  | 8265   | 1  | 0 | 7 | 0          | 0.13499366 | 1 | 8  | 0.30102999 | 0.30102999 |
| chr17 | 9836571  | 9836630  | 60     | 1  | 0 | 8 | 0          | 0.13872638 | 1 | 9  | 0.30102999 | 0.30102999 |
| chr17 | 9836630  | 9880821  | 44192  | 3  | 0 | 7 | 0          | 0.13499366 | 1 | 8  | 0.30102999 | 0.30102999 |
| chr17 | 9880821  | 9931908  | 51088  | 3  | 0 | 8 | 0          | 0.13872638 | 1 | 9  | 0.30102999 | 0.30102999 |
| chr17 | 9931908  | 9969397  | 37490  | 2  | 0 | 8 | 0          | 0.08923391 | 1 | 10 | 0.30102999 | 0.4167287  |
| chr17 | 9969397  | 10049168 | 79772  | 2  | 0 | 8 | 0          | 0.13872638 | 1 | 9  | 0.30102999 | 0.30102999 |
| chr17 | 10049168 | 10293677 | 244510 | 6  | 0 | 8 | 0          | 0.08923391 | 1 | 10 | 0.30102999 | 0.4167287  |
| chr17 | 10293677 | 10324955 | 31279  | 2  | 0 | 8 | 0          | 0.05490675 | 1 | 11 | 0.30102999 | 0.55623409 |
| chr17 | 10324955 | 10325014 | 60     | 1  | 0 | 8 | 0          | 0.03209037 | 1 | 12 | 0.30102999 | 0.72109894 |
| chr17 | 10325014 | 10367974 | 42961  | 1  | 0 | 8 | 0          | 0.03209037 | 0 | 12 | 0          | 0.72109894 |
| chr17 | 10367974 | 10368033 | 60     | 1  | 0 | 8 | 0          | 0.00909834 | 0 | 14 | 0          | 1.13428373 |
| chr17 | 10368033 | 10434536 | 66504  | 1  | 0 | 8 | 0          | 0.01767679 | 0 | 13 | 0          | 0.91308053 |
| chr17 | 10434536 | 10434595 | 60     | 1  | 0 | 8 | 0          | 0.00909834 | 1 | 14 | 0.30102999 | 1.13428373 |
| chr17 | 10434595 | 10506150 | 71556  | 1  | 0 | 6 | 0          | 0.01518174 | 1 | 11 | 0.30102999 | 0.9449689  |
| chr17 | 10506150 | 10536069 | 29920  | 1  | 0 | 6 | 0          | 0.02793176 | 1 | 10 | 0.30102999 | 0.74627054 |
| chr17 | 10536069 | 10602763 | 66695  | 2  | 0 | 6 | 0          | 0.00373523 | 1 | 13 | 0.30102999 | 1.42397267 |
| chr17 | 10602763 | 10608546 | 5784   | 2  | 0 | 6 | 0          | 0.00166733 | 1 | 14 | 0.30102999 | 1.70763027 |
| chr17 | 10608546 | 10840720 | 232175 | 3  | 0 | 6 | 0          | 0.00373523 | 1 | 13 | 0.30102999 | 1.42397267 |
| chr17 | 10840720 | 10840779 | 60     | 1  | 0 | 7 | 0          | 0.00859896 | 1 | 13 | 0.30102999 | 1.14735594 |
| chr17 | 10840779 | 10942053 | 101275 | 1  | 0 | 6 | 0          | 0.02793176 | 0 | 10 | 0          | 0.74627054 |
| chr17 | 10942053 | 11056416 | 114364 | 1  | 0 | 6 | 0          | 0.08122616 | 0 | 8  | 0          | 0.4250187  |
| chr17 | 11056416 | 11149155 | 92740  | 2  | 0 | 7 | 0          | 0.05232577 | 0 | 10 | 0          | 0.56314362 |
| chr17 | 11149155 | 11185236 | 36082  | 2  | 0 | 7 | 0          | 0.05232577 | 1 | 10 | 0.30102999 | 0.56314362 |
| chr17 | 11185236 | 11295301 | 110066 | 2  | 0 | 7 | 0          | 0.05232577 | 0 | 10 | 0          | 0.56314362 |
| chr17 | 11295301 | 11295360 | 60     | 1  | 1 | 8 | 0          | 0.08923391 | 1 | 10 | 0.30102999 | 0.4167287  |
| chr17 | 11295360 | 11365397 | 70038  | 1  | 0 | 7 | 0          | 0.13499366 | 0 | 8  | 0          | 0.30102999 |
| chr17 | 11365397 | 11467147 | 101751 | 2  | 0 | 6 | 0          | 0.129913   | 0 | 7  | 0          | 0.30102999 |
| chr17 | 11467147 | 11529154 | 62008  | 2  | 0 | 7 | 0          | 0.20469099 | 1 | 7  | 0.30102999 | 0.20469099 |
| chr17 | 11529154 | 11597632 | 68479  | 2  | 0 | 7 | 0          | 0.13499366 | 0 | 7  | 0.30102999 | 0.30102999 |
| chr17 | 11597632 | 11624778 | 27147  | 1  | 0 | 6 | 0          | 0.08122616 | 1 | 8  | 0.30102999 | 0.4250187  |
| chr17 | 11624778 | 11624837 | 60     | 1  | 0 | 7 | 0          | 0.05232577 | 1 | 10 | 0.30102999 | 0.56314362 |
| chr17 | 11624837 | 11725245 | 100409 | 2  | 0 | 7 | 0          | 0.20469099 | 0 | 7  | 0          | 0.20469099 |
| chr17 | 11725245 | 11786420 | 61176  | 2  | 0 | 7 | 0          | 0.08584816 | 0 | 9  | 0          | 0.42015402 |
| chr17 | 11786420 | 11827168 | 40749  | 2  | 0 | 8 | 0          | 0.13872638 | 0 | 0  | 0          | 0.30102999 |
| chr17 | 11827168 | 11899624 | 72457  | 1  | 0 | 8 | 0          | 0.20764654 | 0 | 8  | 0          | 0.20764654 |
| chr17 | 11899624 | 11934302 | 34679  | 2  | 0 | 8 | 0          | 0.08923391 | 0 | 10 | 0          | 0.4167287  |
| chr17 | 11934302 | 12049408 | 115107 | 6  | 0 | 8 | 0          | 0.05490675 | 0 | 11 | 0          | 0.55623409 |
| chr17 | 12049408 | 12185767 | 136360 | 1  | 0 | 8 | 0          | 0.08923391 | 0 | 10 | 0          | 0.4167287  |
| chr17 | 12185767 | 12328409 | 142643 | 1  | 0 | 8 | 0          | 0.13872638 | 0 | 9  | 0          | 0.30102999 |
| chr17 | 12328409 | 12328468 | 60     | 1  | 0 | 8 | 0          | 0.08923391 | 0 | 10 | 0          | 0.4167287  |
| chr17 | 12328468 | 12448919 | 120452 | 1  | 0 | 8 | 0          | 0.13872638 | 0 | 9  | 0          | 0.30102999 |
| chr17 | 12448919 | 12453402 | 4484   | 2  | 0 | 9 | 0          | 0.20975986 | 1 | 9  | 0.30102999 | 0.20975986 |
| chr17 | 12453402 | 12538758 | 85357  | 2  | 0 | 9 | 0          | 0.30102999 | 0 | 8  | 0          | 0.13872638 |
| chr17 | 12538758 | 12608903 | 70146  | 2  | 0 | 9 | 0          | 0.42015402 | 0 | 7  | 0          | 0.08584816 |
| chr17 | 12608903 | 12608962 | 60     | 1  | 0 | 9 | 0          | 0.20975986 | 0 | 9  | 0          | 0.20975986 |
| chr17 | 12608962 | 12661441 | 52480  | 2  | 0 | 9 | 0          | 0.30102999 | 0 | 8  | 0          | 0.13872638 |
| chr17 | 12661441 | 12661500 | 60     | 1  | 0 | 9 | 0          | 0.20975986 | 0 | 9  | 0          | 0.20975986 |
| chr17 | 12661500 | 12698956 | 37457  | 1  | 0 | 9 | 0          | 0.30102999 | 0 | 8  | 0          | 0.13872638 |
| chr17 | 12698956 | 12832953 | 133998 | 2  | 0 | 9 | 0          | 0.30102999 | 0 | 7  | 0          | 0.13499366 |
| chr17 | 12832953 | 12914062 | 81110  | 5  | 0 | 9 | 0          | 0.30102999 | 0 | 8  | 0          | 0.13872638 |
| chr17 | 12914062 | 12914121 | 60     | 1  | 0 | 9 | 0          | 0.20975986 | 0 | 9  | 0          | 0.20975986 |
| chr17 | 12914121 | 12980527 | 66407  | 1  | 0 | 9 | 0          | 0.30102999 | 0 | 8  | 0          | 0.13872638 |
| chr17 | 12980527 | 13170280 | 189754 | 1  | 0 | 9 | 0          | 0.42015402 | 0 | 7  | 0          | 0.08584816 |
| chr17 | 13170280 | 13170339 | 60     | 1  | 0 | 9 | 0          | 0.30102999 | 0 | 8  | 0          | 0.13872638 |
| chr17 | 13170339 | 13501809 | 331471 | 7  | 0 | 9 | 0          | 0.42015402 | 0 | 7  | 0          | 0.08584816 |
| chr17 | 13501809 | 13557539 | 55731  | 1  | 0 | 9 | 0          | 0.76806864 | 0 | 5  | 0          | 0.02473314 |
| chr17 | 13557539 | 13646858 | 89240  | 1  | 0 | 8 | 0          | 0.58747015 | 0 | 5  | 0          | 0.04407651 |
| chr17 | 13646858 | 13821052 | 174195 | 2  | 0 | 8 | 0          | 0.79906872 | 0 | 4  | 0          | 0.02074938 |
| chr17 | 13821052 | 13821111 | 60     | 1  | 0 | 8 | 0          | 0.79906872 | 1 | 4  | 0.30102999 | 0.02074938 |
| chr17 | 13821111 | 13980183 | 159073 | 2  | 0 | 7 | 0          | 0.84395715 | 1 | 3  | 0.30102999 | 0.01598258 |
| chr17 | 13980183 | 14111772 | 131590 | 4  | 0 | 6 | 0          | 0.63695542 | 1 | 2  | 0.30102999 | 0.03070643 |
| chr17 | 14111772 | 14210070 | 98299  | 3  | 0 | 7 | 0          | 0.84395715 | 1 | 2  | 0.30102999 | 0.01598258 |
| chr17 | 14210070 | 14210129 | 60     | 1  | 0 | 7 | 0          | 0.60763643 | 1 | 4  | 0.30102999 | 0.03812622 |
| chr17 | 14210129 | 14335884 | 126756 | 2  | 0 | 7 | 0          | 0.84395715 | 1 | 3  | 0.30102999 | 0.01598258 |
| chr17 | 14335884 | 14335943 | 60     | 1  | 0 | 8 | 0          | 0.79906872 | 1 | 4  | 0.30102999 | 0.03070643 |
| chr17 | 14335943 | 14448081 | 111139 | 1  | 0 | 6 | 0          | 0.63695542 | 1 | 3  | 0.30102999 | 0.03070643 |
| chr17 | 14448081 | 14448140 | 60     | 1  | 0 | 6 | 0          | 0.30102999 | 1 | 5  | 0.30102999 | 0.12309572 |
| chr17 | 14448140 | 14654133 | 205994 | 2  | 0 | 5 | 0          | 0.30102999 | 1 | 4  | 0.30102999 | 0.11390336 |
| chr17 | 14654133 | 14933706 | 279574 | 3  | 0 | 5 | 0          | 0.45545077 | 1 | 3  | 0.30102999 | 0.05670724 |
| chr17 | 14933706 | 15093600 | 159895 | 1  | 0 | 5 | 0          | 0.68214471 | 1 | 2  | 0.30102999 | 0.02162467 |
| chr17 | 15093600 | 15093659 | 60     | 1  | 0 | 6 | 0          | 0.20064824 | 1 | 6  | 0.30102999 | 0.20064824 |
| chr17 | 15093659 | 15133086 | 39428  | 1  | 0 | 4 | 0          | 0.18734596 | 1 | 4  | 0.30102999 | 0.18734596 |
| chr17 | 15133086 | 15162532 | 29447  | 2  | 1 | 4 | 0.1218695  | 0.18734596 | 1 | 4  | 0.1218695  | 0.18734596 |
| chr17 | 15162532 | 15207134 | 44603  | 1  | 1 | 3 | 0.1218695  | 0.17593012 | 1 | 3  | 0.1218695  | 0.17593012 |
| chr17 | 15207134 | 15244502 | 37369  | 2  | 1 | 3 | 0.1218695  | 0.05670724 | 1 | 5  | 0.1218695  | 0.45545077 |
| chr17 | 15244502 | 15244561 | 60     | 1  | 1 | 4 | 0.1218695  | 0.1390336  | 1 | 5  | 0.1218695  | 0.30102999 |
| chr17 | 15244561 | 15281888 | 37328  | 1  | 1 | 3 | 0.1218695  | 0.05670724 | 1 | 5  | 0.1218695  | 0.45545077 |
| chr17 | 15281888 | 15422498 | 140611 | 4  | 1 | 4 | 0.1218695  | 0.1390336  | 1 | 5  | 0.1218695  | 0.30102999 |
| chr17 | 15422498 | 15442066 | 19569  | 2  | 1 | 4 | 0.05404976 | 0.1390336  | 2 | 5  | 0.30102999 | 0.30102999 |
| chr17 | 15442066 | 15497883 | 55818  | 1  | 1 | 4 | 0.05404976 | 0.18734596 | 2 | 4  | 0.30102999 | 0.18734596 |
| chr17 | 15497883 | 15990613 | 492731 | 10 | 1 | 4 | 0.05404976 | 0.30102999 | 2 | 3  | 0.30102999 | 0.10122019 |
| chr17 | 15990613 | 15990667 | 55     | 1  | 1 | 5 | 0.05404976 | 0.30102999 | 2 | 4  | 0.30102999 | 0.11390336 |
| chr17 | 15990667 | 16021199 | 30533  | 1  | 1 | 4 | 0.05404976 | 0.18734596 | 2 | 4  | 0.30102999 | 0.18734596 |
| chr17 | 16021199 | 16116872 | 95674  | 4  | 1 | 5 | 0.05404976 | 0.30102999 | 2 | 4  | 0.30102999 | 0.11390336 |
| chr17 | 16116872 | 16116931 | 60     | 1  | 1 | 5 | 0.05404976 | 0.19510895 | 2 | 5  | 0.30102999 | 0.19510895 |
| chr17 | 16116931 | 16192213 | 75283  | 3  | 1 | 3 | 0.05404976 | 0.10122019 | 2 | 4  | 0.30102999 | 0.30102999 |
| chr17 | 16192213 | 16229523 | 37311  | 2  | 1 | 5 | 0.05404976 | 0.19510895 | 2 | 5  | 0.30102999 | 0.19510895 |
| chr17 | 16229523 | 16345336 | 115814 | 4  | 1 | 7 | 0.05404976 | 0.43181735 | 2 | 5  | 0.30102999 | 0.07511598 |
| chr17 | 16345336 | 16393663 | 48328  | 2  | 1 | 6 | 0.1218695  | 0.30102999 | 1 | 5  | 0.1218695  | 0.12309572 |
| chr17 | 16393663 | 16429920 | 36258  | 2  | 1 | 6 | 0.05404976 | 0.30102999 | 2 | 5  | 0.30102999 | 0.12309572 |
| chr17 | 16429920 | 16510077 | 80158  | 3  | 1 | 7 | 0.05404976 | 0.30102999 | 2 | 6  | 0.30102999 | 0.129913   |
| chr17 | 16510077 | 16532793 | 22717  | 1  | 1 | 7 | 0.05404976 | 0.43181735 | 2 | 5  | 0.30102999 | 0.07511598 |
| chr17 | 16532793 | 16822683 | 289891 | 1  | 1 | 7 | 0.1218695  | 0.43181735 | 1 | 5  | 0.1218695  | 0.07511598 |
| chr17 | 16822683 | 16865923 | 43241  | 2  | 1 | 7 | 0.1218695  | 0.30102999 | 1 | 6  | 0.1218695  | 0.129913   |
| chr17 | 16865923 | 16892401 | 26479  | 2  | 1 | 7 | 0.1218695  | 0.20469099 | 1 | 7  | 0.1218695  | 0.20469099 |
| chr17 | 16892401 | 16951702 | 59302  | 2  | 1 | 7 | 0.1218695  | 0.13499366 | 1 | 8  | 0.1218695  | 0.30102999 |
| chr   |          |          |        |    |   |   |            |            |   |    |            |            |

|         |          |          |        |    |    |    |            |            |   |    |            |            |            |
|---------|----------|----------|--------|----|----|----|------------|------------|---|----|------------|------------|------------|
| chr17   | 18834191 | 18858079 | 23889  | 1  | 0  | 7  | 0          | 0.20469099 | 0 | 7  | 0          | 0.20469099 |            |
| chr17   | 18858079 | 18882975 | 24897  | 1  | 0  | 7  | 0          | 0.30102999 | 0 | 6  | 0          | 0.129913   |            |
| chr17   | 18882975 | 18928347 | 45373  | 3  | 1  | 7  | 0.30102999 | 0.30102999 | 0 | 6  | 0          | 0.129913   |            |
| chr17   | 18928347 | 18928400 | 54     | 1  | 1  | 7  | 0.30102999 | 0.20469099 | 0 | 7  | 0          | 0.20469099 |            |
| chr17   | 18928400 | 19200770 | 272371 | 1  | 0  | 6  | 0          | 0.20064824 | 0 | 6  | 0          | 0.20064824 |            |
| chr17   | 19200770 | 19221911 | 21142  | 1  | 0  | 6  | 0          | 0.30102999 | 0 | 5  | 0          | 0.12309572 |            |
| chr17   | 19221911 | 19239027 | 17117  | 2  | 1  | 6  | 0.30102999 | 0.30102999 | 0 | 5  | 0          | 0.12309572 |            |
| chr17   | 19239027 | 19289953 | 50927  | 8  | 1  | 6  | 0.30102999 | 0.20064824 | 0 | 6  | 0          | 0.20064824 |            |
| chr17   | 19289953 | 19612027 | 322075 | 8  | 0  | 6  | 0          | 0.20064824 | 0 | 6  | 0          | 0.20064824 |            |
| chr17   | 19612027 | 19683783 | 71757  | 3  | 0  | 6  | 0          | 0.20064824 | 1 | 6  | 0          | 0.20064824 |            |
| chr17   | 19683783 | 19729437 | 45655  | 2  | 1  | 6  | 0.1218695  | 0.20064824 | 1 | 6  | 0.1218695  | 0.20064824 |            |
| chr17   | 19729437 | 19748711 | 19275  | 2  | 1  | 6  | 0.05404976 | 0.129913   | 2 | 7  | 0.30102999 | 0.30102999 |            |
| chr17   | 19748711 | 19775060 | 26350  | 1  | 1  | 6  | 0.05404976 | 0.20064824 | 2 | 6  | 0.30102999 | 0.20064824 |            |
| chr17   | 19775060 | 19809365 | 34306  | 1  | 1  | 6  | 0.05404976 | 0.30102999 | 2 | 5  | 0.30102999 | 0.12309572 |            |
| chr17   | 19809365 | 19925782 | 116418 | 2  | 1  | 6  | 0.05404976 | 0.44141547 | 2 | 4  | 0.30102999 | 0.06713722 |            |
| chr17   | 19925782 | 19925841 | 60     | 1  | 1  | 6  | 0.05404976 | 0.30102999 | 2 | 5  | 0.30102999 | 0.12309572 |            |
| chr17   | 19925841 | 19958955 | 33115  | 1  | 0  | 6  | 0          | 0.30102999 | 1 | 5  | 0.30102999 | 0.12309572 |            |
| chr17   | 19958955 | 20141913 | 182959 | 5  | 0  | 7  | 0          | 0.30102999 | 1 | 6  | 0.30102999 | 0.129913   |            |
| chr17   | 20141913 | 20193169 | 51257  | 2  | 0  | 7  | 0          | 0.08584816 | 1 | 9  | 0.30102999 | 0.42015402 |            |
| chr17   | 20193169 | 20523954 | 330786 | 1  | 0  | 7  | 0          | 0.08584816 | 1 | 9  | 0.30102999 | 0.42015402 |            |
| chr17   | 20523954 | 20524013 | 60     | 1  | 0  | 8  | 0          | 0.03209037 | 0 | 12 | 0          | 0.72102984 |            |
| chr17   | 20524013 | 20657174 | 143162 | 2  | 0  | 7  | 0          | 0.05232577 | 0 | 10 | 0          | 0.56314362 |            |
| chr17   | 20657174 | 20702612 | 34349  | 1  | 0  | 7  | 0          | 0.08584816 | 1 | 9  | 0          | 0.42015402 |            |
| chr17   | 20702612 | 20787090 | 84479  | 1  | 0  | 7  | 0          | 0.20469099 | 1 | 9  | 0          | 0.20469099 |            |
| chr17   | 20787090 | 20787149 | 60     | 1  | 0  | 7  | 0          | 0.13499366 | 0 | 8  | 0          | 0.30102999 |            |
| chr17   | 20787149 | 20810287 | 23139  | 1  | 0  | 5  | 0          | 0.07511598 | 0 | 7  | 0          | 0.43181735 |            |
| chr17   | 20810287 | 20810346 | 60     | 1  | 0  | 6  | 0          | 0.129913   | 0 | 7  | 0          | 0.30102999 |            |
| chr17   | 20810346 | 20877111 | 66766  | 1  | 0  | 5  | 0          | 0.12309572 | 0 | 6  | 0          | 0.30102999 |            |
| chr17   | 20877111 | 20936596 | 59486  | 5  | 0  | 6  | 0          | 0.20064824 | 0 | 6  | 0          | 0.20064824 |            |
| chr17   | 20936596 | 21034071 | 97476  | 2  | 1  | 6  | 0.30102999 | 0.20064824 | 0 | 6  | 0          | 0.20064824 |            |
| chr17   | 21034071 | 21034130 | 60     | 1  | 1  | 6  | 0.30102999 | 0.129913   | 0 | 7  | 0          | 0.30102999 |            |
| chr17   | 21034130 | 21070382 | 36253  | 1  | 1  | 5  | 0.30102999 | 0.12309572 | 0 | 6  | 0          | 0.30102999 |            |
| chr17   | 21070382 | 21155636 | 85255  | 2  | 1  | 4  | 0.30102999 | 0.13390336 | 0 | 5  | 0          | 0.30102999 |            |
| chr17   | 21155636 | 21199405 | 43770  | 3  | 1  | 4  | 0.30102999 | 0.06713722 | 0 | 6  | 0          | 0.44141547 |            |
| chr17   | 25403446 | 25403505 | 60     | 1  | 1  | 4  | 0.30102999 | 0.30102999 | 0 | 3  | 0          | 0.10122019 |            |
| chr17   | 25403505 | 25626982 | 223478 | 2  | 1  | 3  | 0.30102999 | 0.30102999 | 0 | 2  | 0          | 0.08289318 |            |
| chr17   | 25626982 | 25691127 | 61416  | 3  | 1  | 5  | 0.30102999 | 0.19510895 | 0 | 5  | 0          | 0.19510895 |            |
| chr17   | 25691127 | 25774462 | 83336  | 3  | 1  | 7  | 0.30102999 | 0.20469099 | 0 | 7  | 0          | 0.20469099 |            |
| chr17   | 25774462 | 25854931 | 80470  | 2  | 1  | 7  | 0.30102999 | 0.30102999 | 0 | 6  | 0          | 0.129913   |            |
| chr17   | 25854931 | 25854990 | 60     | 1  | 1  | 8  | 0.30102999 | 0.20764654 | 0 | 8  | 0          | 0.20764654 |            |
| chr17   | 25854990 | 25928445 | 73456  | 1  | 1  | 8  | 0.30102999 | 0.30102999 | 0 | 7  | 0          | 0.13499366 |            |
| chr17   | 25928445 | 25954759 | 26315  | 1  | 0  | 8  | 0          | 0.30102999 | 0 | 7  | 0          | 0.13499366 |            |
| chr17   | 25954759 | 26035213 | 80455  | 2  | 0  | 8  | 0          | 0.20764654 | 1 | 8  | 0.30102999 | 0.20764654 |            |
| chr17   | 26035213 | 26091841 | 56629  | 1  | 0  | 7  | 0          | 0.13499366 | 0 | 8  | 0.30102999 | 0.30102999 |            |
| chr17   | 26091841 | 26091892 | 52     | 1  | 0  | 9  | 0          | 0.30102999 | 2 | 8  | 0.6114001  | 0.13872638 |            |
| chr17   | 26091892 | 26207297 | 115406 | 4  | 0  | 9  | 0          | 0.30102999 | 1 | 8  | 0.30102999 | 0.13872638 |            |
| chr17   | 26207297 | 26322015 | 114719 | 2  | 0  | 10 | 0          | 0.30102999 | 2 | 9  | 0.6114001  | 0.14135546 |            |
| chr17   | 26322015 | 26322074 | 60     | 1  | 0  | 10 | 0          | 0.14303407 | 2 | 11 | 0.6114001  | 0.30102999 |            |
| chr17   | 26322074 | 26369913 | 47840  | 1  | 0  | 10 | 0          | 0.21118145 | 2 | 10 | 0.6114001  | 0.21118145 |            |
| chr17   | 26369913 | 26607585 | 237673 | 5  | 0  | 9  | 0          | 0.14135546 | 2 | 10 | 0.6114001  | 0.30102999 |            |
| chr17   | 26607585 | 26633122 | 25538  | 2  | 0  | 10 | 0          | 0.21118145 | 2 | 10 | 0.6114001  | 0.21118145 |            |
| chr17   | 26633122 | 26685857 | 52736  | 7  | 0  | 10 | 0          | 0.14303407 | 2 | 11 | 0.6114001  | 0.30102999 |            |
| chr17   | 26685857 | 26695483 | 9627   | 2  | 0  | 10 | 0          | 0.21118145 | 2 | 10 | 0.6114001  | 0.21118145 |            |
| chr17   | 26695483 | 27104442 | 408960 | 24 | 0  | 10 | 0          | 0.14303407 | 2 | 11 | 0.6114001  | 0.30102999 |            |
| chr17   | 27104442 | 27183648 | 79207  | 2  | 0  | 10 | 0          | 0.21118145 | 2 | 10 | 0.6114001  | 0.21118145 |            |
| chr17   | 27183648 | 27183703 | 56     | 1  | 0  | 10 | 0          | 0.14303407 | 2 | 11 | 0.6114001  | 0.30102999 |            |
| chr17   | 27183703 | 27332563 | 148861 | 7  | 0  | 10 | 0          | 0.21118145 | 2 | 10 | 0.6114001  | 0.21118145 |            |
| chr17   | 27332563 | 27408450 | 75888  | 3  | 0  | 10 | 0          | 0.14303407 | 2 | 11 | 0.6114001  | 0.30102999 |            |
| chr17   | 27408450 | 27492277 | 83828  | 2  | 0  | 10 | 0          | 0.21118145 | 2 | 10 | 0.6114001  | 0.21118145 |            |
| chr17   | 27492277 | 27577306 | 85030  | 2  | 0  | 9  | 0          | 0.14135546 | 2 | 10 | 0.6114001  | 0.30102999 |            |
| chr17   | 27577306 | 27613865 | 36560  | 1  | 0  | 9  | 0          | 0.20975986 | 2 | 9  | 0.6114001  | 0.20975986 |            |
| chr17   | 27613865 | 27720288 | 106424 | 4  | 0  | 9  | 0          | 0.30102999 | 2 | 9  | 0.6114001  | 0.14135546 |            |
| chr17   | 27720288 | 27720347 | 60     | 1  | 0  | 10 | 0          | 0.21118145 | 2 | 10 | 0.6114001  | 0.21118145 |            |
| chr17   | 27720347 | 27809262 | 88916  | 3  | 0  | 10 | 0          | 0.4167287  | 2 | 8  | 0.6114001  | 0.08923391 |            |
| chr17   | 27809262 | 27870478 | 61217  | 3  | 0  | 10 | 0          | 0.21118145 | 2 | 10 | 0.6114001  | 0.21118145 |            |
| chr17   | 27870478 | 27915052 | 44576  | 4  | 0  | 10 | 0          | 0.4167287  | 1 | 8  | 0.30102999 | 0.08923391 |            |
| chr17   | 27915052 | 27915103 | 52     | 1  | 0  | 10 | 0          | 0.30102999 | 0 | 10 | 0.6114001  | 0.14135546 |            |
| chr17   | 27915103 | 27942065 | 26663  | 2  | 0  | 9  | 0          | 0.30102999 | 0 | 9  | 0.30102999 | 0.13872638 |            |
| chr17   | 27942065 | 27975040 | 32976  | 2  | 0  | 9  | 0          | 0.20975986 | 1 | 9  | 0.30102999 | 0.20975986 |            |
| chr17   | 27975040 | 28003819 | 28780  | 2  | 0  | 9  | 0          | 0.42015402 | 2 | 1  | 7          | 0.30102999 | 0.08584816 |
| chr17   | 28003819 | 28038347 | 34529  | 2  | 0  | 9  | 0          | 0.30102999 | 1 | 8  | 0.30102999 | 0.13872638 |            |
| chr17   | 28038347 | 28038406 | 60     | 1  | 1  | 9  | 0          | 0.20975986 | 1 | 9  | 0.30102999 | 0.20975986 |            |
| chr17   | 28038406 | 28166499 | 128094 | 3  | 0  | 9  | 0          | 0.30102999 | 1 | 9  | 0.30102999 | 0.13872638 |            |
| chr17   | 28166499 | 28206921 | 40423  | 2  | 0  | 9  | 0          | 0.20975986 | 1 | 9  | 0.30102999 | 0.20975986 |            |
| chr17   | 28206921 | 28275264 | 68344  | 2  | 0  | 7  | 0          | 0.13499366 | 0 | 9  | 0.30102999 | 0.30102999 |            |
| chr17   | 28275264 | 28360817 | 85554  | 3  | 0  | 8  | 0          | 0.20764654 | 1 | 8  | 0.30102999 | 0.20764654 |            |
| chr17   | 28360817 | 28360876 | 60     | 1  | 0  | 9  | 0          | 0.30102999 | 1 | 8  | 0.30102999 | 0.13872638 |            |
| chr17   | 28360876 | 28454277 | 93402  | 2  | 0  | 8  | 0          | 0.20764654 | 1 | 8  | 0.30102999 | 0.20764654 |            |
| chr17   | 28454277 | 28512892 | 58616  | 3  | 0  | 8  | 0          | 0.20764654 | 2 | 8  | 0.6114001  | 0.20764654 |            |
| chr17   | 28512892 | 28581015 | 68124  | 3  | 0  | 10 | 0          | 0.30102999 | 2 | 9  | 0.6114001  | 0.14135546 |            |
| chr17   | 28581015 | 28641737 | 60723  | 3  | 0  | 12 | 0          | 0.55190077 | 2 | 9  | 0.6114001  | 0.0565833  |            |
| chr17   | 28641737 | 28670859 | 29123  | 1  | 0  | 12 | 0          | 0.72109894 | 2 | 8  | 0.6114001  | 0.03209037 |            |
| chr17   | 28670859 | 28723046 | 52188  | 1  | 11 | 0  | 0          | 0.55623409 | 2 | 8  | 0.6114001  | 0.05490675 |            |
| chr17   | 28723046 | 28765976 | 42931  | 1  | 0  | 10 | 0          | 0.4167287  | 2 | 8  | 0.6114001  | 0.08923391 |            |
| chr17   | 28765976 | 28766035 | 60     | 1  | 0  | 10 | 0          | 0.30102999 | 2 | 9  | 0.6114001  | 0.14135546 |            |
| chr17   | 28766035 | 28839691 | 73657  | 1  | 0  | 9  | 0          | 0.20975986 | 2 | 9  | 0.6114001  | 0.20975986 |            |
| chr17   | 28839691 | 28839750 | 60     | 1  | 0  | 10 | 0          | 0.30102999 | 2 | 9  | 0.6114001  | 0.14135546 |            |
| chr17   | 28839750 | 29024352 | 184603 | 2  | 0  | 9  | 0          | 0.20975986 | 1 | 9  | 0.30102999 | 0.20975986 |            |
| chr17   | 29024352 | 29024411 | 60     | 1  | 0  | 9  | 0          | 0.20975986 | 2 | 9  | 0.6114001  | 0.20975986 |            |
| chr17   | 29024411 | 29124350 | 99940  | 1  | 0  | 8  | 0          | 0.13872638 | 1 | 9  | 0.30102999 | 0.30102999 |            |
| chr17   | 29124350 | 29161600 | 37251  | 2  | 0  | 7  | 0          | 0.13499366 | 0 | 8  | 0.30102999 | 0.30102999 |            |
| chr17   | 29161600 | 29196637 | 35038  | 2  | 0  | 8  | 0          | 0.13872638 | 0 | 9  | 0.6114001  | 0.30102999 |            |
| chr17   | 29196637 | 29227482 | 30846  | 1  | 0  | 7  | 0          | 0.20469099 | 2 | 7  | 0.6114001  | 0.20469099 |            |
| chr17   | 29227482 | 29260816 | 33335  | 1  | 0  | 6  | 0          | 0.20064824 | 2 | 6  | 0.6114001  | 0.20064824 |            |
| chr17   | 29260816 | 29260875 | 60     | 1  | 0  | 6  | 0          | 0.129913   | 2 | 7  | 0.6114001  | 0.30102999 |            |
| chr17   | 29260875 | 29285446 | 24572  | 1  | 0  | 6  | 0          | 0.20064824 | 2 | 6  | 0.6114001  | 0.20064824 |            |
| chr17</ |          |          |        |    |    |    |            |            |   |    |            |            |            |



|       |          |          |        |    |   |   |           |            |   |    |            |            |
|-------|----------|----------|--------|----|---|---|-----------|------------|---|----|------------|------------|
| chr17 | 31344644 | 31404629 | 59986  | 2  | 0 | 6 | 0         | 0.20064824 | 1 | 6  | 0.30102999 | 0.20064824 |
| chr17 | 31404629 | 31439108 | 34480  | 2  | 0 | 6 | 0         | 0.129913   | 2 | 7  | 0.61140001 | 0.30102999 |
| chr17 | 31439108 | 31595510 | 156403 | 3  | 0 | 6 | 0         | 0.129913   | 1 | 7  | 0.30102999 | 0.30102999 |
| chr17 | 31595510 | 31640034 | 44525  | 1  | 0 | 6 | 0         | 0.20064824 | 1 | 6  | 0.30102999 | 0.20064824 |
| chr17 | 31640034 | 31718391 | 78358  | 2  | 0 | 6 | 0         | 0.20064824 | 2 | 0  | 0.20064824 | 0.20064824 |
| chr17 | 31718391 | 31718450 | 60     | 1  | 0 | 6 | 0         | 0.129913   | 1 | 7  | 0.30102999 | 0.30102999 |
| chr17 | 31718450 | 31830271 | 111822 | 2  | 0 | 6 | 0         | 0.20064824 | 0 | 6  | 0.20064824 | 0.20064824 |
| chr17 | 31830271 | 31953228 | 122958 | 4  | 0 | 6 | 0         | 0.129913   | 0 | 0  | 0.30102999 | 0.30102999 |
| chr17 | 31953228 | 32007395 | 54168  | 2  | 0 | 6 | 0         | 0.08122616 | 0 | 8  | 0.4250187  | 0.4250187  |
| chr17 | 32007395 | 32104806 | 97412  | 3  | 0 | 7 | 0         | 0.13499366 | 0 | 8  | 0.30102999 | 0.30102999 |
| chr17 | 32104806 | 32250724 | 145919 | 2  | 0 | 6 | 0         | 0.129913   | 0 | 7  | 0.30102999 | 0.30102999 |
| chr17 | 32250724 | 32293551 | 42828  | 2  | 0 | 7 | 0         | 0.20469099 | 0 | 7  | 0.20469099 | 0.20469099 |
| chr17 | 32293551 | 32293610 | 60     | 1  | 0 | 7 | 0         | 0.08584816 | 0 | 9  | 0.42015402 | 0.42015402 |
| chr17 | 32293610 | 3232197  | 38588  | 1  | 0 | 7 | 0         | 0.13499366 | 0 | 8  | 0.30102999 | 0.30102999 |
| chr17 | 3232197  | 32397574 | 65378  | 1  | 0 | 7 | 0         | 0.20469099 | 0 | 7  | 0.20469099 | 0.20469099 |
| chr17 | 32397574 | 32464313 | 66740  | 1  | 0 | 6 | 0         | 0.129913   | 0 | 7  | 0.30102999 | 0.30102999 |
| chr17 | 32464313 | 32464372 | 60     | 1  | 0 | 6 | 0         | 0.08122616 | 0 | 8  | 0.4250187  | 0.4250187  |
| chr17 | 32464372 | 32598136 | 133765 | 2  | 0 | 6 | 0         | 0.129913   | 0 | 7  | 0.30102999 | 0.30102999 |
| chr17 | 32598136 | 32685273 | 87138  | 5  | 0 | 6 | 0         | 0.08122616 | 0 | 8  | 0.4250187  | 0.4250187  |
| chr17 | 32685273 | 32858674 | 173402 | 2  | 0 | 6 | 0         | 0.129913   | 0 | 7  | 0.30102999 | 0.30102999 |
| chr17 | 32858674 | 32858733 | 60     | 1  | 0 | 6 | 0         | 0.04875589 | 0 | 7  | 0.5732208  | 0.5732208  |
| chr17 | 32858733 | 33094072 | 23540  | 4  | 0 | 6 | 0         | 0.129913   | 0 | 6  | 0.30102999 | 0.30102999 |
| chr17 | 33094072 | 33228898 | 134827 | 1  | 0 | 5 | 0         | 0.07511598 | 0 | 7  | 0.43181735 | 0.43181735 |
| chr17 | 33228898 | 33442267 | 213270 | 8  | 0 | 5 | 0         | 0.07511598 | 1 | 7  | 0.30102999 | 0.43181735 |
| chr17 | 33442267 | 33461778 | 19512  | 3  | 0 | 5 | 0         | 0.04407651 | 1 | 8  | 0.30102999 | 0.58747015 |
| chr17 | 33461778 | 33687356 | 225579 | 4  | 0 | 5 | 0         | 0.07511598 | 1 | 7  | 0.30102999 | 0.43181735 |
| chr17 | 33687356 | 33877743 | 190388 | 6  | 0 | 6 | 0         | 0.129913   | 1 | 7  | 0.30102999 | 0.30102999 |
| chr17 | 33877743 | 33966585 | 88843  | 4  | 0 | 5 | 0         | 0.07511598 | 1 | 7  | 0.30102999 | 0.43181735 |
| chr17 | 33966585 | 33966644 | 60     | 1  | 0 | 6 | 0         | 0.129913   | 1 | 7  | 0.30102999 | 0.30102999 |
| chr17 | 33966644 | 34105605 | 138962 | 5  | 0 | 6 | 0         | 0.20064824 | 1 | 6  | 0.30102999 | 0.20064824 |
| chr17 | 34105605 | 34207136 | 101532 | 7  | 0 | 6 | 0         | 0.129913   | 1 | 7  | 0.30102999 | 0.30102999 |
| chr17 | 34207136 | 34261571 | 54436  | 2  | 0 | 6 | 0         | 0.20064824 | 1 | 6  | 0.30102999 | 0.20064824 |
| chr17 | 34261571 | 34306837 | 45267  | 2  | 0 | 5 | 0         | 0.12309572 | 1 | 6  | 0.30102999 | 0.30102999 |
| chr17 | 34306837 | 34343942 | 37106  | 2  | 0 | 5 | 0         | 0.19510895 | 1 | 5  | 0.30102999 | 0.19510895 |
| chr17 | 34343942 | 34394384 | 50443  | 3  | 0 | 5 | 0         | 0.12309572 | 1 | 6  | 0.30102999 | 0.30102999 |
| chr17 | 34394384 | 34394443 | 60     | 1  | 0 | 6 | 0         | 0.20064824 | 1 | 6  | 0.30102999 | 0.20064824 |
| chr17 | 34394443 | 34437534 | 43092  | 2  | 0 | 5 | 0         | 0.12309572 | 1 | 6  | 0.30102999 | 0.30102999 |
| chr17 | 34437534 | 34817422 | 379889 | 1  | 0 | 5 | 0         | 0.19510895 | 1 | 5  | 0.30102999 | 0.19510895 |
| chr17 | 34817422 | 34851537 | 34116  | 2  | 0 | 6 | 0         | 0.30102999 | 1 | 5  | 0.30102999 | 0.12309572 |
| chr17 | 34851537 | 34995226 | 143690 | 8  | 0 | 6 | 0         | 0.20064824 | 1 | 6  | 0.30102999 | 0.20064824 |
| chr17 | 34995226 | 35221557 | 226332 | 2  | 0 | 6 | 0         | 0.129913   | 1 | 7  | 0.30102999 | 0.30102999 |
| chr17 | 35221557 | 35294957 | 73401  | 1  | 0 | 6 | 0         | 0.20064824 | 1 | 6  | 0.30102999 | 0.20064824 |
| chr17 | 35294957 | 35388984 | 94028  | 2  | 0 | 5 | 0         | 0.19510895 | 1 | 5  | 0.30102999 | 0.19510895 |
| chr17 | 35388984 | 35413303 | 24320  | 1  | 0 | 4 | 0         | 0.11390336 | 1 | 5  | 0.30102999 | 0.30102999 |
| chr17 | 35413303 | 35508199 | 94897  | 3  | 0 | 3 | 0         | 0.05670724 | 0 | 5  | 0.45545077 | 0.45545077 |
| chr17 | 35508199 | 35557058 | 48860  | 2  | 0 | 4 | 0         | 0.11390336 | 1 | 5  | 0.30102999 | 0.30102999 |
| chr17 | 35557058 | 35646371 | 89314  | 4  | 0 | 5 | 0         | 0.19510895 | 1 | 5  | 0.30102999 | 0.19510895 |
| chr17 | 35646371 | 35687296 | 40926  | 2  | 0 | 4 | 0         | 0.11390336 | 1 | 5  | 0.30102999 | 0.30102999 |
| chr17 | 35687296 | 35733060 | 45765  | 1  | 0 | 3 | 0         | 0.05670724 | 1 | 5  | 0.30102999 | 0.45545077 |
| chr17 | 35733060 | 35862118 | 129059 | 7  | 0 | 7 | 0         | 0.05670724 | 2 | 5  | 0.61140001 | 0.45545077 |
| chr17 | 35862118 | 35908460 | 46343  | 1  | 0 | 3 | 0         | 0.05670724 | 1 | 5  | 0.30102999 | 0.45545077 |
| chr17 | 35908460 | 35932024 | 23565  | 2  | 0 | 3 | 0         | 0.01598258 | 1 | 7  | 0.30102999 | 0.84395715 |
| chr17 | 35932024 | 35932083 | 60     | 1  | 0 | 4 | 0         | 0.03812622 | 1 | 7  | 0.30102999 | 0.60763643 |
| chr17 | 35932083 | 36019505 | 87423  | 3  | 0 | 3 | 0         | 0.01598258 | 0 | 7  | 0.84395715 | 0.84395715 |
| chr17 | 36019505 | 36047008 | 27504  | 2  | 0 | 4 | 0         | 0.03812622 | 0 | 7  | 0.60763643 | 0.60763643 |
| chr17 | 36047008 | 36079310 | 32303  | 2  | 0 | 5 | 0         | 0.07511598 | 0 | 7  | 0.43181735 | 0.43181735 |
| chr17 | 36079310 | 36079369 | 60     | 1  | 0 | 6 | 0         | 0.129913   | 0 | 7  | 0.30102999 | 0.30102999 |
| chr17 | 36079369 | 36473175 | 393807 | 2  | 0 | 5 | 0         | 0.07511598 | 0 | 7  | 0.43181735 | 0.43181735 |
| chr17 | 36473175 | 36552167 | 78993  | 3  | 0 | 7 | 0         | 0.20469099 | 1 | 7  | 0.30102999 | 0.20469099 |
| chr17 | 36552167 | 36696338 | 144172 | 2  | 0 | 6 | 0         | 0.129913   | 1 | 7  | 0.30102999 | 0.30102999 |
| chr17 | 36696338 | 36740844 | 44507  | 1  | 0 | 6 | 0         | 0.20064824 | 0 | 6  | 0.20064824 | 0.20064824 |
| chr17 | 36740844 | 36777825 | 36982  | 2  | 0 | 7 | 0         | 0.30102999 | 0 | 6  | 0.129913   | 0.129913   |
| chr17 | 36777825 | 36777884 | 60     | 1  | 0 | 7 | 0         | 0.20469099 | 0 | 7  | 0.20469099 | 0.20469099 |
| chr17 | 36777884 | 36862720 | 84837  | 1  | 0 | 6 | 0         | 0.129913   | 0 | 7  | 0.30102999 | 0.30102999 |
| chr17 | 36862720 | 36870211 | 7492   | 2  | 0 | 6 | 0         | 0.08122616 | 1 | 8  | 0.30102999 | 0.4250187  |
| chr17 | 36870211 | 36872192 | 1982   | 2  | 0 | 6 | 0         | 0.04875589 | 1 | 9  | 0.30102999 | 0.5732208  |
| chr17 | 36872192 | 36890774 | 18583  | 3  | 0 | 5 | 0         | 0.04407651 | 1 | 8  | 0.30102999 | 0.58747015 |
| chr17 | 36890774 | 36902787 | 12014  | 2  | 0 | 6 | 0         | 0.04875589 | 1 | 9  | 0.30102999 | 0.5732208  |
| chr17 | 36902787 | 36924995 | 22209  | 2  | 0 | 6 | 0         | 0.02473314 | 1 | 9  | 0.30102999 | 0.76806864 |
| chr17 | 36924995 | 36925054 | 60     | 1  | 0 | 6 | 0         | 0.04875589 | 1 | 9  | 0.30102999 | 0.5732208  |
| chr17 | 36925054 | 36963632 | 38579  | 2  | 0 | 5 | 0         | 0.04407651 | 1 | 8  | 0.30102999 | 0.58747015 |
| chr17 | 36963632 | 36963691 | 60     | 1  | 0 | 6 | 0         | 0.08122616 | 1 | 8  | 0.30102999 | 0.4250187  |
| chr17 | 36963691 | 37007395 | 43705  | 2  | 0 | 5 | 0         | 0.04407651 | 1 | 8  | 0.30102999 | 0.58747015 |
| chr17 | 37007395 | 37192290 | 184896 | 5  | 0 | 6 | 0         | 0.08122616 | 1 | 8  | 0.30102999 | 0.4250187  |
| chr17 | 37192290 | 37270721 | 78432  | 4  | 0 | 6 | 0         | 0.02793176 | 1 | 10 | 0.30102999 | 0.74627054 |
| chr17 | 37270721 | 37707861 | 437141 | 15 | 0 | 7 | 0         | 0.05232577 | 1 | 10 | 0.30102999 | 0.56314362 |
| chr17 | 37707861 | 37885501 | 177641 | 14 | 0 | 8 | 0         | 0.08923391 | 1 | 10 | 0.30102999 | 0.4167287  |
| chr17 | 37885501 | 37919725 | 34225  | 1  | 0 | 8 | 0         | 0.20764654 | 1 | 8  | 0.30102999 | 0.20764654 |
| chr17 | 37919725 | 37949117 | 29393  | 1  | 0 | 8 | 0         | 0.4250187  | 1 | 6  | 0.30102999 | 0.08122616 |
| chr17 | 37949117 | 37968295 | 19179  | 2  | 0 | 8 | 0         | 0.30102999 | 1 | 7  | 0.30102999 | 0.13499366 |
| chr17 | 37968295 | 37968354 | 60     | 1  | 0 | 8 | 0         | 0.13872638 | 1 | 9  | 0.30102999 | 0.30102999 |
| chr17 | 37968354 | 38177636 | 209283 | 11 | 0 | 8 | 0         | 0.20764654 | 1 | 8  | 0.30102999 | 0.20764654 |
| chr17 | 38177636 | 38345454 | 167819 | 6  | 0 | 7 | 0         | 0.13499366 | 1 | 8  | 0.30102999 | 0.30102999 |
| chr17 | 38345454 | 38493909 | 148456 | 8  | 0 | 8 | 0         | 0.20764654 | 1 | 8  | 0.30102999 | 0.20764654 |
| chr17 | 38493909 | 38612193 | 118285 | 7  | 0 | 7 | 0         | 0.13499366 | 1 | 8  | 0.30102999 | 0.30102999 |
| chr17 | 38612193 | 38644473 | 32281  | 3  | 0 | 7 | 0         | 0.08584816 | 1 | 9  | 0.30102999 | 0.42015402 |
| chr17 | 38644473 | 38763827 | 119355 | 2  | 0 | 5 | 0         | 0.02473314 | 1 | 9  | 0.30102999 | 0.76806864 |
| chr17 | 38763827 | 38763886 | 60     | 1  | 1 | 5 | 0.1218695 | 0.02473314 | 1 | 9  | 0.1218695  | 0.76806864 |
| chr17 | 38763886 | 38816237 | 52352  | 2  | 1 | 4 | 0.1218695 | 0.01077081 | 1 | 9  | 0.1218695  | 1.01542894 |
| chr17 | 38816237 | 38816291 | 55     | 1  | 1 | 5 | 0.1218695 | 0.02473314 | 1 | 9  | 0.1218695  | 0.76806864 |
| chr17 | 38816291 | 38856613 | 40323  | 1  | 0 | 5 | 0         | 0.02473314 | 1 | 9  | 0.30102999 | 0.76806864 |
| chr17 | 38856613 | 38856672 | 60     | 1  | 0 | 6 | 0         | 0.04875589 | 1 | 9  | 0.30102999 | 0.5732208  |
| chr17 | 38856672 | 38956124 | 99453  | 3  | 0 | 5 | 0         | 0.02473314 | 1 | 9  | 0.30102999 | 0.76806864 |
| chr17 | 38956124 | 38956183 | 60     | 1  | 0 | 6 | 0         | 0.04875589 | 1 | 9  | 0.30102999 | 0.5732208  |
| chr17 | 38956183 | 39305263 | 349081 | 7  | 0 | 5 | 0         | 0.02473314 | 1 | 9  | 0.30102999 | 0.76806864 |
| chr17 | 39305263 | 39305322 | 60     | 1  |   |   |           |            |   |    |            |            |

|       |          |          |        |    |   |   |            |            |   |    |            |            |
|-------|----------|----------|--------|----|---|---|------------|------------|---|----|------------|------------|
| chr17 | 41178955 | 41181165 | 2211   | 2  | 4 | 4 | 0.76005302 | 0.00108487 | 1 | 12 | 0.01091641 | 1.81706455 |
| chr17 | 41181165 | 41267792 | 86628  | 4  | 3 | 4 | 0.51676182 | 0.00108487 | 1 | 12 | 0.02438896 | 1.81706455 |
| chr17 | 41267792 | 41311893 | 44102  | 1  | 2 | 4 | 0.30102999 | 0.00108487 | 1 | 12 | 0.05404976 | 1.81706455 |
| chr17 | 41311893 | 41334568 | 22676  | 2  | 5 | 5 | 0.30102999 | 0.00317045 | 1 | 12 | 0.05404976 | 1.46403142 |
| chr17 | 41334568 | 41334627 | 60     | 1  | 3 | 5 | 0.51676182 | 0.00317045 | 1 | 12 | 0.02438896 | 1.46403142 |
| chr17 | 41334627 | 41338305 | 3679   | 1  | 1 | 5 | 0.1218695  | 0.00317045 | 1 | 12 | 0.1218695  | 1.46403142 |
| chr17 | 41338305 | 41521548 | 183244 | 3  | 1 | 5 | 0.1218695  | 0.00666883 | 1 | 11 | 0.1218695  | 1.20557689 |
| chr17 | 41521548 | 41566817 | 45270  | 2  | 2 | 5 | 0.30102999 | 0.00666883 | 1 | 11 | 0.05404976 | 1.20557689 |
| chr17 | 41566817 | 41585014 | 18198  | 2  | 5 | 5 | 0.30102999 | 0.00317045 | 1 | 12 | 0.05404976 | 1.46403142 |
| chr17 | 41585014 | 41659047 | 74034  | 5  | 2 | 5 | 0.1575501  | 0.00317045 | 2 | 12 | 0.1575501  | 1.46403142 |
| chr17 | 41659047 | 41909344 | 250298 | 8  | 1 | 5 | 0.1218695  | 0.00666883 | 1 | 11 | 0.1218695  | 1.20557689 |
| chr17 | 41909344 | 41925110 | 15767  | 2  | 1 | 5 | 0.05404976 | 0.00666883 | 2 | 11 | 0.30102999 | 1.20557689 |
| chr17 | 41925110 | 41981102 | 55993  | 2  | 1 | 5 | 0.1218695  | 0.00666883 | 1 | 11 | 0.1218695  | 1.20557689 |
| chr17 | 41981102 | 42155638 | 174537 | 9  | 1 | 5 | 0.05404976 | 0.00666883 | 2 | 11 | 0.30102999 | 1.20557689 |
| chr17 | 42155638 | 42397034 | 241397 | 12 | 1 | 5 | 0.05404976 | 0.00317045 | 2 | 12 | 0.30102999 | 1.46403142 |
| chr17 | 42397034 | 42455126 | 58093  | 2  | 1 | 4 | 0.05404976 | 0.00247414 | 1 | 11 | 0.30102999 | 1.52371709 |
| chr17 | 42455126 | 42472919 | 17794  | 2  | 1 | 4 | 0.05404976 | 0.00108487 | 2 | 12 | 0.30102999 | 1.81706455 |
| chr17 | 42472919 | 42472978 | 60     | 1  | 1 | 5 | 0.05404976 | 0.00317045 | 2 | 12 | 0.30102999 | 1.46403142 |
| chr17 | 42472978 | 42521371 | 48394  | 1  | 1 | 5 | 0.05404976 | 0.00108487 | 2 | 12 | 0.30102999 | 1.81706455 |
| chr17 | 42521371 | 42521430 | 60     | 1  | 4 | 6 | 0.02438896 | 0.00108487 | 3 | 12 | 0.51676182 | 1.81706455 |
| chr17 | 42521430 | 43074777 | 553348 | 16 | 1 | 4 | 0.05404976 | 0.00108487 | 2 | 12 | 0.30102999 | 1.81706455 |
| chr17 | 43074777 | 43101333 | 26557  | 1  | 1 | 4 | 0.05404976 | 0.00530919 | 2 | 10 | 0.30102999 | 1.25681329 |
| chr17 | 43101333 | 43123495 | 22163  | 1  | 1 | 4 | 0.1218695  | 0.00530919 | 1 | 10 | 0.1218695  | 1.25681329 |
| chr17 | 43123495 | 43240166 | 116672 | 9  | 1 | 4 | 0.1218695  | 0.00108487 | 1 | 12 | 0.1218695  | 1.81706455 |
| chr17 | 43240166 | 43470064 | 22989  | 6  | 1 | 4 | 0.1218695  | 0.00247414 | 1 | 11 | 0.1218695  | 1.52371709 |
| chr17 | 43470064 | 43513427 | 43364  | 1  | 3 | 1 | 0.1218695  | 7.28E-04   | 1 | 11 | 0.1218695  | 1.91540774 |
| chr17 | 43513427 | 43778669 | 265243 | 2  | 1 | 3 | 0.1218695  | 0.00170589 | 1 | 10 | 0.1218695  | 1.61091002 |
| chr17 | 43778669 | 43880294 | 101626 | 1  | 2 | 2 | 0.1218695  | 9.54E-04   | 1 | 9  | 0.1218695  | 1.74076927 |
| chr17 | 43880294 | 43923074 | 42781  | 1  | 2 | 2 | 0.1218695  | 0.00221948 | 1 | 8  | 0.1218695  | 1.44210395 |
| chr17 | 43923074 | 43954391 | 31318  | 2  | 1 | 2 | 0.1218695  | 0.00378107 | 1 | 9  | 0.1218695  | 1.33111237 |
| chr17 | 43954391 | 44004965 | 50575  | 2  | 1 | 3 | 0.1218695  | 0.0079614  | 1 | 8  | 0.1218695  | 1.07548421 |
| chr17 | 44004965 | 44005024 | 60     | 1  | 1 | 3 | 0.1218695  | 0.00378107 | 1 | 9  | 0.1218695  | 1.33111237 |
| chr17 | 44005024 | 44063394 | 58371  | 3  | 1 | 2 | 0.1218695  | 9.54E-04   | 1 | 9  | 0.1218695  | 1.74076927 |
| chr17 | 44063394 | 44127941 | 64548  | 4  | 1 | 2 | 0.1218695  | 0.00221948 | 1 | 8  | 0.1218695  | 1.44210395 |
| chr17 | 44127941 | 44144963 | 17023  | 1  | 1 | 2 | 0.1218695  | 0.00493743 | 1 | 7  | 0.1218695  | 1.16581773 |
| chr17 | 44144963 | 44210763 | 65801  | 2  | 1 | 2 | 0.1218695  | 0.01053319 | 1 | 6  | 0.1218695  | 0.91219088 |
| chr17 | 44210763 | 44276947 | 66185  | 3  | 1 | 2 | 0.1218695  | 0.00493743 | 1 | 7  | 0.1218695  | 1.16581773 |
| chr17 | 44276947 | 44277006 | 60     | 1  | 2 | 2 | 0.1218695  | 0.00221948 | 1 | 8  | 0.1218695  | 1.44210395 |
| chr17 | 44277006 | 44787865 | 510860 | 2  | 1 | 1 | 0.1218695  | 0.00478973 | 1 | 5  | 0.1218695  | 1.02643191 |
| chr17 | 44787865 | 44811727 | 23863  | 2  | 1 | 6 | 0.05404976 | 0.20064824 | 2 | 6  | 0.30102999 | 0.20064824 |
| chr17 | 44811727 | 44857482 | 45756  | 1  | 5 | 2 | 0.05404976 | 0.12309572 | 2 | 6  | 0.30102999 | 0.30102999 |
| chr17 | 44857482 | 44885925 | 28444  | 2  | 1 | 4 | 0.05404976 | 0.06713722 | 2 | 6  | 0.30102999 | 0.44141547 |
| chr17 | 44885925 | 45067710 | 181786 | 4  | 1 | 5 | 0.05404976 | 0.12309572 | 2 | 6  | 0.30102999 | 0.30102999 |
| chr17 | 45067710 | 45067769 | 60     | 1  | 6 | 6 | 0.05404976 | 0.129913   | 2 | 7  | 0.30102999 | 0.30102999 |
| chr17 | 45067769 | 45197719 | 12951  | 2  | 1 | 5 | 0.05404976 | 0.12309572 | 2 | 6  | 0.30102999 | 0.30102999 |
| chr17 | 45197719 | 45197778 | 60     | 1  | 1 | 6 | 0.05404976 | 0.20064824 | 2 | 6  | 0.30102999 | 0.20064824 |
| chr17 | 45197778 | 45270234 | 72457  | 1  | 1 | 5 | 0.05404976 | 0.12309572 | 2 | 6  | 0.30102999 | 0.30102999 |
| chr17 | 45270234 | 45298000 | 27767  | 2  | 1 | 5 | 0.05404976 | 0.07511598 | 2 | 7  | 0.30102999 | 0.43181735 |
| chr17 | 45298000 | 45367080 | 69081  | 2  | 1 | 4 | 0.05404976 | 0.06713722 | 2 | 6  | 0.30102999 | 0.44141547 |
| chr17 | 45367080 | 45438799 | 71220  | 7  | 1 | 4 | 0.05404976 | 0.03812622 | 2 | 7  | 0.30102999 | 0.60763643 |
| chr17 | 45438799 | 45468935 | 30137  | 2  | 1 | 5 | 0.05404976 | 0.07511598 | 2 | 7  | 0.30102999 | 0.43181735 |
| chr17 | 45468935 | 45547074 | 78140  | 3  | 1 | 3 | 0.05404976 | 0.01598258 | 2 | 7  | 0.30102999 | 0.84395715 |
| chr17 | 45547074 | 45681087 | 134014 | 1  | 1 | 3 | 0.05404976 | 0.03070643 | 1 | 6  | 0.30102999 | 0.63695542 |
| chr17 | 45681087 | 45681146 | 60     | 1  | 1 | 5 | 0.02438896 | 0.04407651 | 3 | 8  | 0.51676182 | 0.58747015 |
| chr17 | 45681146 | 45818799 | 137654 | 4  | 1 | 5 | 0.02438896 | 0.07511598 | 3 | 7  | 0.51676182 | 0.43181735 |
| chr17 | 45818799 | 45892336 | 73538  | 2  | 1 | 5 | 0.02438896 | 0.12309572 | 3 | 6  | 0.51676182 | 0.30102999 |
| chr17 | 45892336 | 46048958 | 156623 | 10 | 1 | 5 | 0.02438896 | 0.07511598 | 3 | 7  | 0.51676182 | 0.43181735 |
| chr17 | 46048958 | 46103834 | 54877  | 2  | 2 | 6 | 0.0429175  | 0.129913   | 4 | 7  | 0.47744371 | 0.30102999 |
| chr17 | 46103834 | 46229568 | 125735 | 5  | 2 | 5 | 0.0429175  | 0.07511598 | 4 | 7  | 0.47744371 | 0.43181735 |
| chr17 | 46229568 | 46350779 | 121212 | 4  | 2 | 6 | 0.0429175  | 0.129913   | 4 | 7  | 0.47744371 | 0.30102999 |
| chr17 | 46350779 | 46423296 | 72518  | 1  | 2 | 6 | 0.0429175  | 0.20064824 | 4 | 6  | 0.47744371 | 0.20064824 |
| chr17 | 46423296 | 46561305 | 138010 | 2  | 2 | 5 | 0.0429175  | 0.19510895 | 4 | 6  | 0.47744371 | 0.19510895 |
| chr17 | 46561305 | 46561363 | 59     | 1  | 2 | 5 | 0.0429175  | 0.12309572 | 4 | 6  | 0.47744371 | 0.30102999 |
| chr17 | 46561363 | 46655693 | 94331  | 5  | 2 | 5 | 0.0429175  | 0.19510895 | 5 | 4  | 0.47744371 | 0.19510895 |
| chr17 | 46655693 | 46803924 | 148232 | 11 | 2 | 6 | 0.0429175  | 0.12309572 | 4 | 6  | 0.47744371 | 0.12309572 |
| chr17 | 46803924 | 46840200 | 36277  | 1  | 1 | 4 | 0.0429175  | 0.30102999 | 1 | 5  | 0.47744371 | 0.12309572 |
| chr17 | 46840200 | 46840259 | 60     | 1  | 1 | 5 | 0.01091641 | 0.30102999 | 4 | 6  | 0.76005302 | 0.20064824 |
| chr17 | 46840259 | 46873448 | 33190  | 1  | 1 | 5 | 0.01091641 | 0.12309572 | 4 | 6  | 0.76005302 | 0.30102999 |
| chr17 | 46873448 | 46873507 | 60     | 1  | 2 | 5 | 0.0429175  | 0.12309572 | 4 | 6  | 0.47744371 | 0.30102999 |
| chr17 | 46873507 | 46889453 | 15947  | 1  | 1 | 5 | 0.01091641 | 0.12309572 | 4 | 6  | 0.76005302 | 0.30102999 |
| chr17 | 46889453 | 46889512 | 60     | 1  | 1 | 5 | 0.01091641 | 0.07511598 | 4 | 7  | 0.76005302 | 0.43181735 |
| chr17 | 46889512 | 46919109 | 29598  | 1  | 1 | 5 | 0.01091641 | 0.12309572 | 4 | 6  | 0.76005302 | 0.30102999 |
| chr17 | 46919109 | 46919161 | 53     | 1  | 2 | 6 | 0.0429175  | 0.20064824 | 4 | 6  | 0.47744371 | 0.20064824 |
| chr17 | 46919161 | 46992463 | 73303  | 2  | 2 | 6 | 0.0429175  | 0.30102999 | 4 | 5  | 0.12309572 | 0.12309572 |
| chr17 | 46992463 | 46992522 | 60     | 1  | 2 | 6 | 0.0429175  | 0.20064824 | 4 | 6  | 0.47744371 | 0.20064824 |
| chr17 | 46992522 | 47021848 | 29327  | 1  | 1 | 6 | 0.01091641 | 0.30102999 | 4 | 5  | 0.76005302 | 0.12309572 |
| chr17 | 47021848 | 47085941 | 64094  | 2  | 1 | 5 | 0.01091641 | 0.19510895 | 4 | 5  | 0.76005302 | 0.19510895 |
| chr17 | 47085941 | 47128482 | 42542  | 2  | 1 | 5 | 0.00478973 | 0.12309572 | 5 | 6  | 1.02643191 | 0.30102999 |
| chr17 | 47128482 | 47224588 | 96107  | 1  | 1 | 5 | 0.01091641 | 0.12309572 | 4 | 6  | 0.76005302 | 0.30102999 |
| chr17 | 47224588 | 47286668 | 62081  | 3  | 1 | 6 | 0.01091641 | 0.129913   | 4 | 7  | 0.76005302 | 0.30102999 |
| chr17 | 47286668 | 47304479 | 17812  | 3  | 3 | 6 | 0.10122019 | 0.129913   | 4 | 7  | 0.30102999 | 0.30102999 |
| chr17 | 47304479 | 47332571 | 28093  | 1  | 2 | 6 | 0.0429175  | 0.20064824 | 4 | 6  | 0.47744371 | 0.20064824 |
| chr17 | 47332571 | 47413290 | 80720  | 2  | 2 | 6 | 0.0429175  | 0.30102999 | 4 | 6  | 0.47744371 | 0.12309572 |
| chr17 | 47413290 | 47440073 | 26784  | 2  | 3 | 6 | 0.10122019 | 0.08122616 | 4 | 8  | 0.30102999 | 0.4250187  |
| chr17 | 47440073 | 47483950 | 43878  | 2  | 3 | 6 | 0.05670724 | 0.08122616 | 5 | 8  | 0.45545077 | 0.4250187  |
| chr17 | 47483950 | 47577439 | 93490  | 2  | 3 | 6 | 0.05670724 | 0.20064824 | 5 | 6  | 0.45545077 | 0.20064824 |
| chr17 | 47577439 | 47588570 | 11332  | 3  | 3 | 6 | 0.05670724 | 0.129913   | 5 | 6  | 0.45545077 | 0.30102999 |
| chr17 | 47588570 | 47655292 | 66723  | 1  | 3 | 5 | 0.05670724 | 0.07511598 | 5 | 7  | 0.45545077 | 0.43181735 |
| chr17 | 47655292 | 47655351 | 60     | 1  | 5 | 5 | 0.19510895 | 0.07511598 | 5 | 7  | 0.19510895 | 0.43181735 |
| chr17 | 47655351 | 47659366 | 4016   | 1  | 5 |   |            |            |   |    |            |            |

|       |          |          |        |    |   |   |            |            |   |   |            |            |
|-------|----------|----------|--------|----|---|---|------------|------------|---|---|------------|------------|
| chr17 | 50397431 | 50636777 | 23947  | 3  | 0 | 5 | 0          | 0.45545077 | 3 | 3 | 0.93173516 | 0.05670724 |
| chr17 | 50636777 | 50636836 | 60     | 1  | 1 | 5 | 0.02438896 | 0.45545077 | 3 | 3 | 0.51676182 | 0.05670724 |
| chr17 | 50636836 | 50957899 | 321064 | 2  | 0 | 2 | 0          | 0.1575501  | 3 | 2 | 0.93173516 | 0.1575501  |
| chr17 | 50957899 | 51084336 | 126438 | 2  | 0 | 3 | 0          | 0.30102999 | 3 | 2 | 0.93173516 | 0.08289318 |
| chr17 | 51084336 | 51084395 | 60     | 1  | 0 | 3 | 0          | 0.17593012 | 3 | 3 | 0.93173516 | 0.17593012 |
| chr17 | 51084395 | 51164695 | 80301  | 1  | 0 | 2 | 0          | 0.08289318 | 3 | 3 | 0.93173516 | 0.30102999 |
| chr17 | 51164695 | 51306425 | 141731 | 1  | 0 | 1 | 0          | 0.1218695  | 2 | 1 | 0.61140001 | 0.1218695  |
| chr17 | 51306425 | 51814294 | 507870 | 5  | 0 | 1 | 0          | 0.1218695  | 1 | 1 | 0.30102999 | 0.1218695  |
| chr17 | 51814294 | 52116240 | 301947 | 6  | 0 | 2 | 0          | 0.1575501  | 1 | 2 | 0.30102999 | 0.1575501  |
| chr17 | 52116240 | 52189051 | 72812  | 1  | 0 | 1 | 0          | 0.1218695  | 1 | 1 | 0.30102999 | 0.1218695  |
| chr17 | 52189051 | 52319645 | 130595 | 2  | 0 | 1 | 0          | 0.1218695  | 2 | 1 | 0.61140001 | 0.1218695  |
| chr17 | 52319645 | 52415424 | 95780  | 2  | 0 | 2 | 0          | 0.05404976 | 3 | 2 | 0.93173516 | 0.30102999 |
| chr17 | 52415424 | 52582241 | 166818 | 2  | 0 | 2 | 0          | 0.08289318 | 3 | 2 | 0.93173516 | 0.30102999 |
| chr17 | 52582241 | 52768316 | 186076 | 3  | 0 | 4 | 0          | 0.11390336 | 3 | 5 | 0.93173516 | 0.30102999 |
| chr17 | 52768316 | 52859927 | 91612  | 1  | 0 | 4 | 0          | 0.18734596 | 3 | 4 | 0.93173516 | 0.18734596 |
| chr17 | 52859927 | 5342860  | 482934 | 13 | 1 | 4 | 0.02438896 | 0.18734596 | 3 | 4 | 0.51676182 | 0.18734596 |
| chr17 | 5342860  | 53471088 | 128229 | 5  | 1 | 3 | 0.02438896 | 0.10122019 | 3 | 4 | 0.51676182 | 0.30102999 |
| chr17 | 53471088 | 54004003 | 532916 | 11 | 1 | 4 | 0.02438896 | 0.18734596 | 3 | 4 | 0.51676182 | 0.18734596 |
| chr17 | 54004003 | 54004062 | 60     | 1  | 1 | 5 | 0.02438896 | 0.19510895 | 3 | 5 | 0.51676182 | 0.19510895 |
| chr17 | 54004062 | 54153473 | 149412 | 6  | 1 | 3 | 0.02438896 | 0.10122019 | 3 | 4 | 0.51676182 | 0.30102999 |
| chr17 | 54153473 | 54485676 | 332204 | 1  | 1 | 2 | 0.02438896 | 0.0429175  | 3 | 4 | 0.51676182 | 0.47744371 |
| chr17 | 54485676 | 54557875 | 82200  | 2  | 2 | 2 | 0.05404976 | 0.0429175  | 2 | 2 | 0.30102999 | 0.47744371 |
| chr17 | 54557875 | 54671126 | 103852 | 2  | 1 | 2 | 0.02438896 | 0.0429175  | 2 | 3 | 0.51676182 | 0.47744371 |
| chr17 | 54671126 | 54671170 | 45     | 1  | 1 | 3 | 0.02438896 | 0.10122019 | 3 | 4 | 0.51676182 | 0.30102999 |
| chr17 | 54671170 | 54940391 | 268622 | 4  | 1 | 2 | 0.02438896 | 0.0429175  | 3 | 4 | 0.51676182 | 0.47744371 |
| chr17 | 54940391 | 54940450 | 60     | 1  | 2 | 2 | 0.02438896 | 0.02162467 | 3 | 5 | 0.51676182 | 0.68214471 |
| chr17 | 54940450 | 54981671 | 41222  | 2  | 1 | 2 | 0.02438896 | 0.0429175  | 3 | 4 | 0.51676182 | 0.47744371 |
| chr17 | 54981671 | 54981726 | 56     | 1  | 2 | 2 | 0.02438896 | 0.02162467 | 3 | 5 | 0.51676182 | 0.68214471 |
| chr17 | 54981726 | 55154651 | 172926 | 4  | 1 | 2 | 0.02438896 | 0.0429175  | 3 | 4 | 0.51676182 | 0.47744371 |
| chr17 | 55154651 | 55154710 | 60     | 1  | 2 | 2 | 0.02438896 | 0.02162467 | 3 | 5 | 0.51676182 | 0.68214471 |
| chr17 | 55154710 | 55334843 | 180134 | 4  | 1 | 2 | 0.02438896 | 0.0429175  | 3 | 4 | 0.51676182 | 0.47744371 |
| chr17 | 55334843 | 55355976 | 21134  | 2  | 2 | 2 | 0.08289318 | 0.0429175  | 3 | 4 | 0.30102999 | 0.47744371 |
| chr17 | 55355976 | 55394752 | 38777  | 2  | 2 | 2 | 0.08289318 | 0.08289318 | 3 | 3 | 0.30102999 | 0.30102999 |
| chr17 | 55394752 | 55394811 | 60     | 1  | 2 | 2 | 0.30102999 | 0.0429175  | 3 | 4 | 0.10122019 | 0.47744371 |
| chr17 | 55394811 | 55478738 | 83928  | 2  | 4 | 2 | 0.47744371 | 0.0429175  | 2 | 4 | 0.0429175  | 0.47744371 |
| chr17 | 55478738 | 55478794 | 57     | 1  | 4 | 2 | 0.30102999 | 0.0429175  | 3 | 4 | 0.10122019 | 0.47744371 |
| chr17 | 55478794 | 55553385 | 74592  | 1  | 3 | 2 | 0.30102999 | 0.0429175  | 2 | 4 | 0.08289318 | 0.47744371 |
| chr17 | 55553385 | 55607018 | 53634  | 2  | 3 | 2 | 0.10122019 | 0.0429175  | 4 | 4 | 0.30102999 | 0.47744371 |
| chr17 | 55607018 | 55644495 | 37478  | 2  | 3 | 2 | 0.05670724 | 0.0429175  | 5 | 4 | 0.45545077 | 0.47744371 |
| chr17 | 55644495 | 55644554 | 60     | 1  | 3 | 2 | 0.05670724 | 0.02162467 | 5 | 5 | 0.45545077 | 0.68214471 |
| chr17 | 55644554 | 55979159 | 334606 | 8  | 3 | 2 | 0.05670724 | 0.0429175  | 5 | 4 | 0.45545077 | 0.47744371 |
| chr17 | 55979159 | 56033469 | 54311  | 3  | 2 | 2 | 0.05670724 | 0.08289318 | 5 | 3 | 0.45545077 | 0.30102999 |
| chr17 | 56033469 | 56033528 | 60     | 1  | 4 | 2 | 0.11390336 | 0.0429175  | 5 | 4 | 0.30102999 | 0.47744371 |
| chr17 | 56033528 | 56064108 | 30581  | 2  | 2 | 2 | 0.05670724 | 0.0429175  | 5 | 4 | 0.45545077 | 0.47744371 |
| chr17 | 56064108 | 56328941 | 264834 | 7  | 3 | 2 | 0.10122019 | 0.0429175  | 4 | 4 | 0.30102999 | 0.47744371 |
| chr17 | 56328941 | 56356066 | 27126  | 1  | 3 | 2 | 0.10122019 | 0.08289318 | 4 | 3 | 0.30102999 | 0.30102999 |
| chr17 | 56356066 | 56392534 | 36469  | 2  | 4 | 2 | 0.11390336 | 0.08289318 | 5 | 3 | 0.30102999 | 0.30102999 |
| chr17 | 56392534 | 56457878 | 65345  | 2  | 3 | 2 | 0.05670724 | 0.08289318 | 5 | 3 | 0.45545077 | 0.30102999 |
| chr17 | 56457878 | 56457937 | 60     | 1  | 4 | 2 | 0.11390336 | 0.0429175  | 5 | 4 | 0.30102999 | 0.47744371 |
| chr17 | 56457937 | 56621571 | 163635 | 7  | 4 | 2 | 0.11390336 | 0.08289318 | 5 | 3 | 0.30102999 | 0.30102999 |
| chr17 | 56621571 | 56659010 | 37440  | 4  | 2 | 2 | 0.06713722 | 0.08289318 | 6 | 3 | 0.44141547 | 0.30102999 |
| chr17 | 56659010 | 56729221 | 70212  | 4  | 4 | 2 | 0.06713722 | 0.0429175  | 6 | 4 | 0.44141547 | 0.47744371 |
| chr17 | 56729221 | 56746399 | 17179  | 2  | 4 | 3 | 0.06713722 | 0.10122019 | 6 | 4 | 0.44141547 | 0.30102999 |
| chr17 | 56746399 | 56811482 | 65084  | 2  | 4 | 3 | 0.11390336 | 0.10122019 | 5 | 4 | 0.30102999 | 0.30102999 |
| chr17 | 56811482 | 56954731 | 143250 | 4  | 4 | 3 | 0.06713722 | 0.10122019 | 6 | 4 | 0.44141547 | 0.30102999 |
| chr17 | 56954731 | 56954790 | 60     | 1  | 4 | 3 | 0.03812622 | 0.10122019 | 7 | 4 | 0.60763643 | 0.30102999 |
| chr17 | 56954790 | 57076221 | 121432 | 3  | 3 | 3 | 0.05198258 | 0.17593012 | 7 | 3 | 0.84395715 | 0.17593012 |
| chr17 | 57076221 | 57246181 | 169961 | 8  | 4 | 3 | 0.03812622 | 0.17593012 | 7 | 3 | 0.60763643 | 0.17593012 |
| chr17 | 57246181 | 57326162 | 79982  | 5  | 4 | 2 | 0.03812622 | 0.08289318 | 7 | 3 | 0.60763643 | 0.30102999 |
| chr17 | 57326162 | 57350236 | 24075  | 1  | 3 | 2 | 0.05198258 | 0.08289318 | 7 | 3 | 0.84395715 | 0.30102999 |
| chr17 | 57350236 | 57350295 | 60     | 1  | 3 | 3 | 0.05198258 | 0.17593012 | 7 | 3 | 0.84395715 | 0.17593012 |
| chr17 | 57350295 | 57424820 | 74526  | 1  | 3 | 2 | 0.03070643 | 0.08289318 | 6 | 3 | 0.63695542 | 0.30102999 |
| chr17 | 57424820 | 57456368 | 31549  | 2  | 3 | 3 | 0.03070643 | 0.17593012 | 6 | 3 | 0.63695542 | 0.17593012 |
| chr17 | 57456368 | 57578587 | 122220 | 1  | 3 | 3 | 0.05670724 | 0.17593012 | 5 | 3 | 0.45545077 | 0.17593012 |
| chr17 | 57578587 | 57578646 | 60     | 1  | 4 | 3 | 0.11390336 | 0.17593012 | 5 | 3 | 0.30102999 | 0.17593012 |
| chr17 | 57578646 | 57680412 | 101767 | 2  | 4 | 3 | 0.18734596 | 0.17593012 | 4 | 3 | 0.18734596 | 0.17593012 |
| chr17 | 57680412 | 57680471 | 60     | 1  | 4 | 3 | 0.11390336 | 0.17593012 | 5 | 3 | 0.30102999 | 0.17593012 |
| chr17 | 57680471 | 57708588 | 28118  | 1  | 4 | 2 | 0.11390336 | 0.1575501  | 5 | 2 | 0.30102999 | 0.1575501  |
| chr17 | 57708588 | 57762906 | 54319  | 3  | 4 | 2 | 0.06713722 | 0.0429175  | 6 | 2 | 0.44141547 | 0.1575501  |
| chr17 | 57762906 | 57762965 | 60     | 1  | 4 | 3 | 0.06713722 | 0.30102999 | 6 | 2 | 0.44141547 | 0.08289318 |
| chr17 | 57762965 | 57762965 | 60     | 1  | 4 | 3 | 0.06713722 | 0.30102999 | 6 | 2 | 0.44141547 | 0.08289318 |
| chr17 | 57762965 | 57958368 | 195404 | 8  | 4 | 2 | 0.06713722 | 0.1575501  | 6 | 2 | 0.44141547 | 0.1575501  |
| chr17 | 57958368 | 57958427 | 60     | 1  | 5 | 2 | 0.12309572 | 0.1575501  | 6 | 2 | 0.30102999 | 0.1575501  |
| chr17 | 57958427 | 57999222 | 40796  | 2  | 5 | 2 | 0.19510895 | 0.1575501  | 5 | 2 | 0.19510895 | 0.1575501  |
| chr17 | 57999222 | 58151259 | 152038 | 4  | 5 | 2 | 0.12309572 | 0.1575501  | 5 | 2 | 0.30102999 | 0.1575501  |
| chr17 | 58151259 | 58299797 | 148539 | 2  | 5 | 2 | 0.19510895 | 0.1575501  | 5 | 2 | 0.19510895 | 0.1575501  |
| chr17 | 58299797 | 58408168 | 108372 | 4  | 5 | 2 | 0.19510895 | 0.08289318 | 5 | 3 | 0.19510895 | 0.30102999 |
| chr17 | 58408168 | 58408227 | 60     | 1  | 3 | 2 | 0.19510895 | 0.17593012 | 5 | 3 | 0.19510895 | 0.17593012 |
| chr17 | 58408227 | 58443234 | 35008  | 1  | 5 | 2 | 0.19510895 | 0.08289318 | 5 | 3 | 0.19510895 | 0.30102999 |
| chr17 | 58443234 | 58464182 | 20949  | 1  | 4 | 2 | 0.11390336 | 0.08289318 | 5 | 3 | 0.30102999 | 0.30102999 |
| chr17 | 58464182 | 58525129 | 60948  | 3  | 5 | 2 | 0.19510895 | 0.08289318 | 5 | 3 | 0.19510895 | 0.30102999 |
| chr17 | 58525129 | 58525188 | 60     | 1  | 6 | 2 | 0.30102999 | 0.08289318 | 5 | 3 | 0.12309572 | 0.30102999 |
| chr17 | 58525188 | 58571989 | 46802  | 1  | 6 | 2 | 0.30102999 | 0.1575501  | 5 | 2 | 0.12309572 | 0.1575501  |
| chr17 | 58571989 | 58711307 | 139319 | 3  | 6 | 2 | 0.30102999 | 0.05404976 | 5 | 2 | 0.12309572 | 0.30102999 |
| chr17 | 58711307 | 58711364 | 58     | 1  | 6 | 1 | 0.20064824 | 0.05404976 | 6 | 2 | 0.20064824 | 0.30102999 |
| chr17 | 58711364 | 58829418 | 118055 | 3  | 6 | 0 | 0.20064824 | 0.20064824 | 6 | 1 | 0.20064824 | 0.30102999 |
| chr17 | 58829418 | 58859460 | 30043  | 2  | 6 | 2 | 0.20064824 | 0.30102999 | 6 | 1 | 0.20064824 | 0.05404976 |
| chr17 | 58859460 | 58914563 | 55104  | 1  | 6 | 1 | 0.20064824 | 0.1218695  | 6 | 1 | 0.20064824 | 0.1218695  |
| chr17 | 58914563 | 58946010 | 31448  | 1  | 6 | 1 | 0.30102999 | 0.1218695  | 5 | 1 | 0.12309572 | 0.1218695  |
| chr17 | 58946010 | 58946069 | 60     | 1  | 7 | 1 | 0.43181735 | 0.1218695  | 5 | 1 | 0.07511598 | 0.1218695  |
| chr17 | 58946069 | 59049359 | 103291 | 2  |   |   |            |            |   |   |            |            |

|       |          |          |        |   |   |   |            |            |   |   |            |            |
|-------|----------|----------|--------|---|---|---|------------|------------|---|---|------------|------------|
| chr17 | 61710076 | 61788174 | 78099  | 5 | 7 | 2 | 0.43181735 | 0.08289318 | 5 | 3 | 0.07511598 | 0.30102999 |
| chr17 | 61788174 | 61831880 | 43707  | 3 | 7 | 2 | 0.60763643 | 0.08289318 | 4 | 3 | 0.03812622 | 0.30102999 |
| chr17 | 61831880 | 61869772 | 37893  | 1 | 6 | 2 | 0.44141547 | 0.08289318 | 4 | 3 | 0.06713722 | 0.30102999 |
| chr17 | 61869772 | 62007164 | 137393 | 7 | 6 | 2 | 0.30102999 | 0.08289318 | 5 | 3 | 0.12309572 | 0.30102999 |
| chr17 | 62007164 | 62032432 | 25269  | 3 | 6 | 2 | 0.20064824 | 0.08289318 | 6 | 3 | 0.20064824 | 0.30102999 |
| chr17 | 62032432 | 62032491 | 60     | 1 | 7 | 2 | 0.30102999 | 0.08289318 | 6 | 3 | 0.129913   | 0.30102999 |
| chr17 | 62032491 | 62121004 | 88514  | 3 | 7 | 2 | 0.43181735 | 0.1575501  | 5 | 2 | 0.07511598 | 0.1575501  |
| chr17 | 62121004 | 62121063 | 60     | 1 | 7 | 2 | 0.43181735 | 0.08289318 | 5 | 3 | 0.07511598 | 0.30102999 |
| chr17 | 62121063 | 62149369 | 28307  | 1 | 6 | 2 | 0.30102999 | 0.08289318 | 5 | 3 | 0.12309572 | 0.30102999 |
| chr17 | 62149369 | 62206386 | 57018  | 2 | 6 | 2 | 0.44141547 | 0.08289318 | 4 | 3 | 0.06713722 | 0.30102999 |
| chr17 | 62206386 | 62225401 | 19016  | 2 | 6 | 2 | 0.20064824 | 0.08289318 | 6 | 3 | 0.20064824 | 0.30102999 |
| chr17 | 62225401 | 62272412 | 47012  | 2 | 6 | 2 | 0.30102999 | 0.08289318 | 5 | 3 | 0.12309572 | 0.30102999 |
| chr17 | 62272412 | 62321833 | 49422  | 3 | 6 | 2 | 0.30102999 | 0.0429175  | 5 | 4 | 0.12309572 | 0.47744371 |
| chr17 | 62321833 | 62367426 | 45594  | 1 | 6 | 2 | 0.44141547 | 0.0429175  | 4 | 4 | 0.06713722 | 0.47744371 |
| chr17 | 62367426 | 62504770 | 137345 | 4 | 6 | 2 | 0.63695542 | 0.0429175  | 3 | 4 | 0.03070643 | 0.47744371 |
| chr17 | 62504770 | 62517528 | 12759  | 3 | 6 | 2 | 0.63695542 | 0.08289318 | 3 | 3 | 0.03070643 | 0.30102999 |
| chr17 | 62517528 | 62574662 | 57135  | 3 | 6 | 2 | 0.44141547 | 0.08289318 | 4 | 3 | 0.06713722 | 0.30102999 |
| chr17 | 62574662 | 62574721 | 60     | 1 | 6 | 2 | 0.44141547 | 0.0429175  | 4 | 4 | 0.06713722 | 0.47744371 |
| chr17 | 62574721 | 62616560 | 41840  | 1 | 5 | 2 | 0.30102999 | 0.0429175  | 4 | 4 | 0.11390336 | 0.47744371 |
| chr17 | 62616560 | 62752050 | 135491 | 3 | 5 | 2 | 0.30102999 | 0.08289318 | 4 | 4 | 0.11390336 | 0.30102999 |
| chr17 | 62752050 | 62752109 | 60     | 1 | 6 | 2 | 0.30102999 | 0.0429175  | 4 | 4 | 0.11390336 | 0.47744371 |
| chr17 | 62752109 | 62779687 | 27579  | 1 | 5 | 2 | 0.45545077 | 0.0429175  | 3 | 4 | 0.05670724 | 0.47744371 |
| chr17 | 62779687 | 62784269 | 4583   | 1 | 5 | 2 | 0.45545077 | 0.08289318 | 3 | 3 | 0.05670724 | 0.30102999 |
| chr17 | 62784269 | 62784313 | 45     | 1 | 5 | 2 | 0.30102999 | 0.08289318 | 3 | 3 | 0.11390336 | 0.30102999 |
| chr17 | 62784313 | 63023677 | 239365 | 3 | 5 | 2 | 0.45545077 | 0.08289318 | 3 | 3 | 0.05670724 | 0.30102999 |
| chr17 | 63023677 | 63049654 | 25978  | 2 | 5 | 3 | 0.45545077 | 0.17593012 | 3 | 3 | 0.05670724 | 0.17593012 |
| chr17 | 63049654 | 63094005 | 44352  | 2 | 6 | 3 | 0.63695542 | 0.17593012 | 3 | 3 | 0.03070643 | 0.17593012 |
| chr17 | 63094005 | 63094064 | 60     | 1 | 6 | 4 | 0.63695542 | 0.18734596 | 3 | 4 | 0.03070643 | 0.18734596 |
| chr17 | 63094064 | 63142306 | 48243  | 1 | 6 | 3 | 0.63695542 | 0.10122019 | 3 | 4 | 0.03070643 | 0.30102999 |
| chr17 | 63142306 | 63248095 | 105790 | 3 | 5 | 2 | 0.45545077 | 0.08289318 | 3 | 3 | 0.05670724 | 0.30102999 |
| chr17 | 63248095 | 63314161 | 66067  | 1 | 5 | 2 | 0.45545077 | 0.1575501  | 3 | 2 | 0.05670724 | 0.1575501  |
| chr17 | 63314161 | 63314220 | 60     | 1 | 6 | 2 | 0.63695542 | 0.1575501  | 3 | 2 | 0.03070643 | 0.1575501  |
| chr17 | 63314220 | 63455672 | 141453 | 1 | 5 | 1 | 0.45545077 | 0.05404976 | 3 | 2 | 0.05670724 | 0.30102999 |
| chr17 | 63455672 | 63531152 | 75481  | 1 | 5 | 1 | 0.45545077 | 0.1218695  | 3 | 1 | 0.05670724 | 0.1218695  |
| chr17 | 63531152 | 63554119 | 22968  | 2 | 7 | 1 | 0.84395715 | 0.1218695  | 3 | 1 | 0.01598258 | 0.1218695  |
| chr17 | 63554119 | 63775413 | 221295 | 6 | 8 | 1 | 1.07548421 | 0.1218695  | 3 | 1 | 0.0079614  | 0.1218695  |
| chr17 | 63775413 | 63848026 | 72614  | 3 | 8 | 1 | 1.07548421 | 0.05404976 | 3 | 2 | 0.0079614  | 0.30102999 |
| chr17 | 63848026 | 63957639 | 109614 | 2 | 8 | 1 | 1.07548421 | 0.1218695  | 3 | 1 | 0.0079614  | 0.1218695  |
| chr17 | 63957639 | 64026072 | 68434  | 1 | 7 | 1 | 0.84395715 | 0.1218695  | 3 | 1 | 0.01598258 | 0.1218695  |
| chr17 | 64026072 | 64049885 | 23814  | 1 | 7 | 0 | 0.84395715 | 0          | 3 | 1 | 0.01598258 | 0.30102999 |
| chr17 | 64049885 | 64049944 | 60     | 1 | 8 | 0 | 1.07548421 | 0          | 3 | 1 | 0.0079614  | 0.30102999 |
| chr17 | 64049944 | 64092355 | 42412  | 3 | 7 | 0 | 0.84395715 | 0          | 3 | 1 | 0.01598258 | 0.30102999 |
| chr17 | 64092355 | 64125890 | 33536  | 2 | 8 | 1 | 1.07548421 | 0.1218695  | 3 | 1 | 0.0079614  | 0.1218695  |
| chr17 | 64125890 | 64125949 | 60     | 1 | 9 | 1 | 1.3311237  | 0.1218695  | 3 | 1 | 0.00378107 | 0.1218695  |
| chr17 | 64125949 | 64254052 | 128104 | 4 | 8 | 1 | 1.07548421 | 0.1218695  | 3 | 1 | 0.0079614  | 0.1218695  |
| chr17 | 64254052 | 64392542 | 138491 | 4 | 8 | 1 | 1.07548421 | 0.05404976 | 3 | 2 | 0.0079614  | 0.30102999 |
| chr17 | 64392542 | 64529282 | 136741 | 2 | 8 | 1 | 1.07548421 | 0.1218695  | 3 | 1 | 0.0079614  | 0.1218695  |
| chr17 | 64529282 | 64590936 | 61655  | 1 | 7 | 1 | 0.84395715 | 0.1218695  | 3 | 1 | 0.01598258 | 0.1218695  |
| chr17 | 64590936 | 64590995 | 60     | 1 | 7 | 1 | 0.84395715 | 0.05404976 | 3 | 2 | 0.01598258 | 0.30102999 |
| chr17 | 64590995 | 64646313 | 55319  | 1 | 7 | 1 | 1.16581773 | 0.05404976 | 2 | 2 | 0.00493743 | 0.30102999 |
| chr17 | 64646313 | 64683354 | 37042  | 1 | 7 | 1 | 1.16581773 | 0.1218695  | 2 | 1 | 0.00493743 | 0.1218695  |
| chr17 | 64683354 | 64737783 | 54430  | 2 | 7 | 1 | 0.84395715 | 0.1218695  | 3 | 1 | 0.01598258 | 0.1218695  |
| chr17 | 64737783 | 64737841 | 59     | 1 | 7 | 1 | 0.60763643 | 0.1218695  | 4 | 1 | 0.03812622 | 0.1218695  |
| chr17 | 64737841 | 64874998 | 137158 | 3 | 7 | 1 | 0.84395715 | 0.1218695  | 3 | 1 | 0.01598258 | 0.1218695  |
| chr17 | 64874998 | 64955325 | 80328  | 2 | 7 | 1 | 0.84395715 | 0.05404976 | 2 | 2 | 0.01598258 | 0.30102999 |
| chr17 | 64955325 | 64992006 | 36682  | 1 | 7 | 0 | 0.84395715 | 0          | 3 | 2 | 0.01598258 | 0.61140001 |
| chr17 | 64992006 | 65074397 | 82392  | 4 | 7 | 0 | 0.60763643 | 0          | 4 | 2 | 0.03812622 | 0.61140001 |
| chr17 | 65074397 | 65124916 | 50520  | 1 | 7 | 0 | 0.84395715 | 0          | 3 | 2 | 0.01598258 | 0.61140001 |
| chr17 | 65124916 | 65343022 | 218107 | 5 | 7 | 0 | 0.84395715 | 0          | 3 | 1 | 0.01598258 | 0.30102999 |
| chr17 | 65343022 | 65343081 | 60     | 1 | 7 | 0 | 0.84395715 | 0          | 3 | 2 | 0.01598258 | 0.61140001 |
| chr17 | 65343081 | 65389605 | 46525  | 3 | 7 | 0 | 0.84395715 | 0          | 3 | 1 | 0.01598258 | 0.30102999 |
| chr17 | 65389605 | 65458702 | 69098  | 3 | 7 | 0 | 0.60763643 | 0          | 4 | 1 | 0.03812622 | 0.30102999 |
| chr17 | 65458702 | 65492032 | 33331  | 2 | 7 | 0 | 0.60763643 | 0          | 4 | 2 | 0.03812622 | 0.61140001 |
| chr17 | 65492032 | 65580340 | 98309  | 2 | 7 | 0 | 0.84395715 | 0          | 3 | 1 | 0.01598258 | 0.30102999 |
| chr17 | 65580340 | 65720329 | 139990 | 4 | 7 | 0 | 0.60763643 | 0          | 4 | 1 | 0.03812622 | 0.30102999 |
| chr17 | 65720329 | 65814243 | 93015  | 2 | 7 | 1 | 0.84395715 | 0          | 3 | 1 | 0.01598258 | 0.30102999 |
| chr17 | 65814243 | 65850820 | 365778 | 7 | 7 | 1 | 0.60763643 | 0.1218695  | 4 | 1 | 0.03812622 | 0.1218695  |
| chr17 | 65850820 | 65955890 | 105071 | 3 | 6 | 0 | 0.44141547 | 0          | 4 | 1 | 0.06713722 | 0.30102999 |
| chr17 | 65955890 | 65955949 | 60     | 1 | 6 | 2 | 0.44141547 | 0.1575501  | 4 | 2 | 0.06713722 | 0.1575501  |
| chr17 | 65955949 | 66208032 | 252084 | 3 | 6 | 0 | 0.44141547 | 0          | 4 | 2 | 0.06713722 | 0.61140001 |
| chr17 | 66208032 | 66208091 | 60     | 1 | 6 | 2 | 0.44141547 | 0.1575501  | 4 | 2 | 0.06713722 | 0.1575501  |
| chr17 | 66208091 | 66398204 | 190114 | 5 | 6 | 1 | 0.44141547 | 0.05404976 | 4 | 2 | 0.06713722 | 0.30102999 |
| chr17 | 66398204 | 66426540 | 28337  | 2 | 7 | 1 | 0.60763643 | 0.05404976 | 4 | 2 | 0.03812622 | 0.30102999 |
| chr17 | 66426540 | 66426599 | 60     | 1 | 8 | 2 | 0.79906872 | 0.1575501  | 0 | 2 | 0.02074938 | 0.1575501  |
| chr17 | 66426599 | 66509929 | 83331  | 4 | 7 | 2 | 0.60763643 | 0.1575501  | 4 | 2 | 0.03812622 | 0.1575501  |
| chr17 | 66509929 | 66519844 | 9916   | 1 | 6 | 2 | 0.44141547 | 0.1575501  | 4 | 2 | 0.06713722 | 0.1575501  |
| chr17 | 66519844 | 66519903 | 60     | 1 | 7 | 2 | 0.60763643 | 0.1575501  | 4 | 2 | 0.03812622 | 0.1575501  |
| chr17 | 66519903 | 66552569 | 32667  | 1 | 6 | 2 | 0.44141547 | 0.1575501  | 4 | 2 | 0.06713722 | 0.1575501  |
| chr17 | 66552569 | 66568637 | 16069  | 2 | 3 | 2 | 0.44141547 | 0.30102999 | 4 | 2 | 0.06713722 | 0.08289318 |
| chr17 | 66568637 | 66588509 | 19873  | 1 | 6 | 2 | 0.44141547 | 0.1575501  | 4 | 2 | 0.06713722 | 0.1575501  |
| chr17 | 66588509 | 66740799 | 152291 | 3 | 7 | 2 | 0.60763643 | 0.1575501  | 4 | 2 | 0.03812622 | 0.1575501  |
| chr17 | 66740799 | 66863607 | 122809 | 1 | 7 | 1 | 0.60763643 | 0.05404976 | 4 | 2 | 0.03812622 | 0.30102999 |
| chr17 | 66863607 | 66971516 | 107910 | 4 | 7 | 0 | 0.60763643 | 0          | 4 | 2 | 0.03812622 | 0.61140001 |
| chr17 | 66971516 | 66971575 | 60     | 1 | 7 | 1 | 0.60763643 | 0.05404976 | 4 | 2 | 0.03812622 | 0.30102999 |
| chr17 | 66971575 | 67016582 | 45008  | 2 | 7 | 0 | 0.60763643 | 0          | 4 | 2 | 0.03812622 | 0.61140001 |
| chr17 | 67016582 | 67047202 | 30621  | 1 | 7 | 0 | 0.60763643 | 0          | 4 | 2 | 0.03812622 | 0.30102999 |
| chr17 | 67047202 | 67094086 | 46885  | 2 | 7 | 0 | 0.84395715 | 0          | 3 | 1 | 0.01598258 | 0.30102999 |
| chr17 | 67094086 | 67132227 | 38142  | 2 | 7 | 0 | 0.60763643 | 0          | 4 | 2 | 0.03812622 | 0.61140001 |
| chr17 | 67132227 | 67149454 | 17228  | 2 | 7 | 3 | 0.60763643 | 0.30102999 | 4 | 2 | 0.03812622 | 0.08289318 |
| chr17 | 67149454 | 67231572 | 82119  | 4 | 7 | 0 | 0.60763643 | 0          | 4 | 1 | 0.03812622 | 0.30102999 |
| chr17 | 67231572 | 67318705 | 87134  | 2 | 7 | 1 | 0.60763643 | 0.1218695  | 4 | 1 | 0.03812622 | 0.1218695  |

|       |          |          |        |   |    |   |            |            |   |   |            |            |
|-------|----------|----------|--------|---|----|---|------------|------------|---|---|------------|------------|
| chr17 | 71630676 | 71272692 | 97017  | 1 | 7  | 0 | 0.84395715 | 0          | 3 | 2 | 0.01598258 | 0.61140001 |
| chr17 | 71727692 | 71757990 | 30299  | 2 | 8  | 0 | 1.07548421 | 0          | 3 | 2 | 0.0079614  | 0.61140001 |
| chr17 | 71757990 | 71758049 | 60     | 1 | 9  | 1 | 1.33111237 | 0.05404976 | 3 | 2 | 0.00378107 | 0.30102999 |
| chr17 | 71758049 | 71785484 | 27436  | 1 | 8  | 1 | 1.07548421 | 0.05404976 | 3 | 2 | 0.0079614  | 0.30102999 |
| chr17 | 71785484 | 71808078 | 22595  | 2 | 8  | 2 | 1.07548421 | 0.1575501  | 3 | 2 | 0.0079614  | 0.1575501  |
| chr17 | 71808078 | 71832461 | 24384  | 1 | 7  | 1 | 0.84395715 | 0.05404976 | 3 | 2 | 0.01598258 | 0.30102999 |
| chr17 | 71832461 | 71963482 | 131022 | 1 | 7  | 0 | 0.84395715 | 0          | 3 | 2 | 0.01598258 | 0.61140001 |
| chr17 | 71963482 | 72110043 | 146562 | 2 | 9  | 1 | 1.33111237 | 0.02438896 | 3 | 3 | 0.00378107 | 0.51676182 |
| chr17 | 72110043 | 72110102 | 60     | 1 | 10 | 1 | 1.2568129  | 0.02438896 | 4 | 3 | 0.00530919 | 0.51676182 |
| chr17 | 72110102 | 72177504 | 67403  | 1 | 9  | 1 | 1.33111237 | 0.02438896 | 3 | 3 | 0.00378107 | 0.51676182 |
| chr17 | 72177504 | 72249220 | 71717  | 4 | 10 | 1 | 1.61091002 | 0.02438896 | 3 | 3 | 0.00170589 | 0.51676182 |
| chr17 | 72249220 | 72268192 | 18973  | 2 | 11 | 1 | 1.91540774 | 0.02438896 | 3 | 3 | 7.28E-04   | 0.51676182 |
| chr17 | 72268192 | 72306574 | 38383  | 1 | 9  | 1 | 1.33111237 | 0.02438896 | 3 | 3 | 0.00378107 | 0.51676182 |
| chr17 | 72306574 | 72329873 | 23300  | 2 | 9  | 1 | 1.33111237 | 0.00478973 | 3 | 5 | 0.00378107 | 1.02643191 |
| chr17 | 72329873 | 72363726 | 33854  | 1 | 8  | 1 | 1.07548421 | 0.10791641 | 3 | 4 | 0.0079614  | 0.76005302 |
| chr17 | 72363726 | 72431963 | 68238  | 2 | 9  | 1 | 1.33111237 | 0.10791641 | 3 | 4 | 0.00378107 | 0.76005302 |
| chr17 | 72431963 | 72475812 | 43850  | 2 | 9  | 1 | 1.33111237 | 0.00478973 | 3 | 5 | 0.00378107 | 1.02643191 |
| chr17 | 72475812 | 72475871 | 60     | 1 | 11 | 1 | 1.91540774 | 0.00478973 | 3 | 5 | 7.28E-04   | 1.02643191 |
| chr17 | 72475871 | 72518922 | 43052  | 1 | 9  | 1 | 1.33111237 | 0.00478973 | 3 | 5 | 0.00378107 | 1.02643191 |
| chr17 | 72518922 | 72567896 | 48975  | 1 | 9  | 1 | 1.33111237 | 0.03916641 | 3 | 4 | 0.00378107 | 0.76005302 |
| chr17 | 72567896 | 72586826 | 18931  | 2 | 12 | 1 | 2.24559516 | 0.01091641 | 3 | 4 | 2.93E-04   | 0.76005302 |
| chr17 | 72586826 | 72619221 | 32396  | 2 | 12 | 1 | 2.24559516 | 0.00478973 | 3 | 5 | 1.10E-04   | 1.02643191 |
| chr17 | 72619221 | 72671837 | 52617  | 2 | 13 | 1 | 2.60294723 | 0.00478973 | 3 | 5 | 1.10E-04   | 1.02643191 |
| chr17 | 72671837 | 72671896 | 60     | 1 | 14 | 1 | 2.98948395 | 0.00478973 | 3 | 5 | 3.88E-05   | 1.02643191 |
| chr17 | 72671896 | 72719620 | 47725  | 2 | 14 | 1 | 2.98948395 | 0.01091641 | 3 | 4 | 3.88E-05   | 0.76005302 |
| chr17 | 72719620 | 72768178 | 48559  | 5 | 15 | 1 | 3.40787294 | 0.01091641 | 3 | 4 | 1.26E-05   | 0.76005302 |
| chr17 | 72768178 | 72814136 | 45959  | 1 | 14 | 1 | 2.98948395 | 0.01091641 | 3 | 4 | 3.88E-05   | 0.76005302 |
| chr17 | 72814136 | 72879541 | 65406  | 4 | 14 | 1 | 2.48919369 | 0.01091641 | 4 | 4 | 1.70E-04   | 0.76005302 |
| chr17 | 72879541 | 72901452 | 21912  | 2 | 15 | 1 | 2.87247834 | 0.01091641 | 4 | 4 | 5.97E-05   | 0.76005302 |
| chr17 | 72901452 | 72901511 | 60     | 1 | 15 | 1 | 2.41659953 | 0.01091641 | 4 | 4 | 2.22E-04   | 0.76005302 |
| chr17 | 72901511 | 72942567 | 41057  | 3 | 14 | 1 | 2.06733314 | 0.01091641 | 5 | 4 | 5.83E-04   | 0.76005302 |
| chr17 | 72942567 | 72962479 | 19913  | 1 | 13 | 1 | 1.7506523  | 0.01091641 | 5 | 4 | 0.00141024 | 0.76005302 |
| chr17 | 72962479 | 73000088 | 37610  | 3 | 14 | 1 | 2.06733314 | 0.01091641 | 5 | 4 | 5.83E-04   | 0.76005302 |
| chr17 | 73000088 | 73013209 | 13122  | 2 | 15 | 1 | 2.02387299 | 0.01091641 | 6 | 4 | 6.86E-04   | 0.76005302 |
| chr17 | 73013209 | 73037077 | 23869  | 2 | 14 | 1 | 2.06733314 | 0.01091641 | 5 | 4 | 5.83E-04   | 0.76005302 |
| chr17 | 73037077 | 73045949 | 8873   | 2 | 14 | 1 | 2.06733314 | 0.00478973 | 5 | 5 | 5.83E-04   | 1.02643191 |
| chr17 | 73045949 | 73164631 | 118683 | 7 | 14 | 1 | 2.48919369 | 0.00478973 | 4 | 5 | 1.70E-04   | 1.02643191 |
| chr17 | 73164631 | 73175266 | 10636  | 2 | 14 | 1 | 2.06733314 | 0.00478973 | 5 | 5 | 5.83E-04   | 1.02643191 |
| chr17 | 73175266 | 73231766 | 56501  | 2 | 13 | 1 | 1.7506523  | 0.00478973 | 5 | 5 | 0.00141024 | 1.02643191 |
| chr17 | 73231766 | 73231825 | 60     | 1 | 14 | 1 | 2.06733314 | 0.00478973 | 5 | 5 | 5.83E-04   | 1.02643191 |
| chr17 | 73231825 | 73281876 | 50052  | 3 | 13 | 1 | 1.7506523  | 0.00478973 | 5 | 5 | 0.00141024 | 1.02643191 |
| chr17 | 73281876 | 73281935 | 60     | 1 | 14 | 1 | 2.06733314 | 0.00478973 | 5 | 5 | 5.83E-04   | 1.02643191 |
| chr17 | 73281935 | 73314150 | 32216  | 1 | 13 | 1 | 1.7506523  | 0.00478973 | 5 | 5 | 0.00141024 | 1.02643191 |
| chr17 | 73314150 | 73423233 | 109084 | 5 | 13 | 1 | 1.42397267 | 0.00478973 | 6 | 5 | 0.00373523 | 1.02643191 |
| chr17 | 73423233 | 73594638 | 171406 | 9 | 13 | 1 | 1.14735594 | 0.00478973 | 7 | 5 | 0.00859896 | 1.02643191 |
| chr17 | 73594638 | 73645757 | 51120  | 3 | 13 | 2 | 1.14735594 | 0.02162467 | 7 | 5 | 0.00859896 | 0.68214471 |
| chr17 | 73645757 | 73649588 | 3832   | 2 | 14 | 2 | 1.39918918 | 0.02162467 | 7 | 5 | 0.00413023 | 0.68214471 |
| chr17 | 73649588 | 73681510 | 31923  | 1 | 14 | 1 | 1.39918918 | 0.00478973 | 7 | 5 | 0.00413023 | 1.02643191 |
| chr17 | 73681510 | 73730142 | 48633  | 2 | 13 | 2 | 1.14735594 | 0.01091641 | 7 | 4 | 0.00859896 | 0.76005302 |
| chr17 | 73730142 | 73730201 | 60     | 1 | 13 | 2 | 1.14735594 | 0.02162467 | 7 | 4 | 0.00859896 | 0.68214471 |
| chr17 | 73730201 | 73757326 | 27126  | 1 | 13 | 1 | 1.14735594 | 0.01091641 | 7 | 4 | 0.00859896 | 0.76005302 |
| chr17 | 73757326 | 73757385 | 60     | 1 | 13 | 1 | 1.14735594 | 0.00478973 | 7 | 5 | 0.00859896 | 1.02643191 |
| chr17 | 73757385 | 73833506 | 76122  | 2 | 13 | 1 | 1.14735594 | 0.01091641 | 7 | 4 | 0.00859896 | 0.76005302 |
| chr17 | 73833506 | 73895307 | 61802  | 4 | 12 | 1 | 0.92532268 | 0.01091641 | 7 | 4 | 0.01667721 | 0.76005302 |
| chr17 | 73895307 | 73924264 | 28958  | 3 | 13 | 1 | 1.14735594 | 0.01091641 | 7 | 4 | 0.00859896 | 0.76005302 |
| chr17 | 73924264 | 73945617 | 21354  | 1 | 12 | 1 | 0.92532268 | 0.01091641 | 7 | 4 | 0.01667721 | 0.76005302 |
| chr17 | 73945617 | 73945676 | 60     | 1 | 13 | 1 | 1.14735594 | 0.01091641 | 7 | 4 | 0.00859896 | 0.76005302 |
| chr17 | 73945676 | 73999785 | 54110  | 2 | 13 | 1 | 1.42397267 | 0.01091641 | 6 | 4 | 0.00373523 | 0.76005302 |
| chr17 | 73999785 | 74053498 | 53714  | 3 | 12 | 1 | 1.17038931 | 0.01091641 | 6 | 4 | 0.00778066 | 0.76005302 |
| chr17 | 74053498 | 74053554 | 57     | 1 | 12 | 1 | 0.92532268 | 0.01091641 | 7 | 4 | 0.01667721 | 0.76005302 |
| chr17 | 74053554 | 74091921 | 38368  | 2 | 12 | 1 | 1.17038931 | 0.01091641 | 6 | 4 | 0.00778066 | 0.76005302 |
| chr17 | 74091921 | 74132445 | 40525  | 1 | 9  | 1 | 0.76806864 | 0.01091641 | 5 | 4 | 0.02473314 | 0.76005302 |
| chr17 | 74132445 | 74132500 | 56     | 1 | 10 | 1 | 0.97390707 | 0.01091641 | 5 | 4 | 0.01320236 | 0.76005302 |
| chr17 | 74132500 | 74157420 | 24921  | 1 | 10 | 1 | 0.97390707 | 0.02438896 | 5 | 3 | 0.01320236 | 0.51676182 |
| chr17 | 74157420 | 74175813 | 18396  | 2 | 11 | 1 | 1.20557689 | 0.02438896 | 5 | 3 | 0.00666883 | 0.51676182 |
| chr17 | 74175813 | 74307079 | 131265 | 5 | 12 | 1 | 1.17038931 | 0.01091641 | 6 | 4 | 0.00778066 | 0.76005302 |
| chr17 | 74307079 | 74382663 | 75584  | 2 | 12 | 1 | 1.46403142 | 0.01091641 | 5 | 4 | 0.00317045 | 0.76005302 |
| chr17 | 74382663 | 74385672 | 3011   | 3 | 12 | 1 | 1.17038931 | 0.00478973 | 6 | 5 | 0.00778066 | 1.02643191 |
| chr17 | 74385672 | 74409883 | 24212  | 1 | 11 | 1 | 0.9449689  | 0.00478973 | 6 | 5 | 0.01518174 | 1.02643191 |
| chr17 | 74409883 | 74463925 | 54043  | 3 | 12 | 1 | 1.17038931 | 0.00478973 | 6 | 5 | 0.00778066 | 1.02643191 |
| chr17 | 74463925 | 74488990 | 25066  | 4 | 12 | 1 | 1.46403142 | 0.00478973 | 5 | 5 | 0.00317045 | 1.02643191 |
| chr17 | 74488990 | 74532333 | 43344  | 2 | 12 | 1 | 1.17038931 | 0.00478973 | 6 | 5 | 0.00778066 | 1.02643191 |
| chr17 | 74532333 | 74576904 | 44572  | 2 | 12 | 1 | 1.46403142 | 0.00478973 | 5 | 5 | 0.00317045 | 1.02643191 |
| chr17 | 74576904 | 74639643 | 62740  | 2 | 10 | 1 | 0.97390707 | 0.00478973 | 5 | 5 | 0.01320236 | 1.02643191 |
| chr17 | 74639643 | 74717932 | 78290  | 3 | 9  | 1 | 0.76806864 | 0.00478973 | 5 | 5 | 0.02473314 | 1.02643191 |
| chr17 | 74717932 | 74737102 | 19171  | 2 | 8  | 1 | 0.58747015 | 0.00478973 | 5 | 5 | 0.04407651 | 1.02643191 |
| chr17 | 74737102 | 74737161 | 60     | 1 | 9  | 1 | 0.76806864 | 0.00478973 | 5 | 5 | 0.02473314 | 1.02643191 |
| chr17 | 74737161 | 74801711 | 64551  | 2 | 8  | 1 | 0.79906872 | 0.00478973 | 4 | 5 | 0.02074938 | 1.02643191 |
| chr17 | 74801711 | 74871938 | 70228  | 1 | 8  | 1 | 1.07548421 | 0.00478973 | 3 | 5 | 0.0079614  | 1.02643191 |
| chr17 | 74871938 | 74890965 | 19028  | 2 | 9  | 1 | 1.33111237 | 0.00478973 | 3 | 5 | 0.00378107 | 1.02643191 |
| chr17 | 74890965 | 74896298 | 5334   | 2 | 9  | 1 | 1.01542894 | 0.00478973 | 4 | 5 | 0.01077081 | 1.02643191 |
| chr17 | 74896298 | 75043235 | 146938 | 2 | 8  | 1 | 0.79906872 | 0.00478973 | 4 | 5 | 0.02074938 | 1.02643191 |
| chr17 | 75043235 | 75043294 | 60     | 1 | 9  | 1 | 1.01542894 | 0.00478973 | 4 | 5 | 0.01077081 | 1.02643191 |
| chr17 | 75043294 | 75105998 | 62705  | 1 | 9  | 1 | 1.01542894 | 0.01091641 | 4 | 4 | 0.01077081 | 0.76005302 |
| chr17 | 75105998 | 75158508 | 52511  | 2 | 11 | 1 | 1.20557689 | 0.01091641 | 5 | 4 | 0.00666883 | 0.76005302 |
| chr17 | 75158508 | 75187323 | 28816  | 2 | 11 | 1 | 0.9449689  | 0.01091641 | 6 | 4 | 0.01518174 | 0.76005302 |
| chr17 | 75187323 | 75278451 | 91129  | 3 | 12 | 1 | 1.17038931 | 0.01091641 | 6 | 4 | 0.00778066 | 0.76005302 |
| chr17 | 75278451 | 75278510 | 60     | 1 | 12 | 1 | 1.17038931 | 0.00478973 | 6 | 5 | 0.00778066 | 1.02643191 |
| chr17 | 75278510 | 75379175 | 100666 | 1 | 12 | 1 | 1.17038931 | 0.02438896 | 6 | 3 | 0.00778066 | 0.51676182 |
| chr17 | 75379175 | 75462870 |        |   |    |   |            |            |   |   |            |            |

|       |          |          |        |    |    |   |            |            |   |   |            |            |
|-------|----------|----------|--------|----|----|---|------------|------------|---|---|------------|------------|
| chr17 | 77303455 | 77303514 | 60     | 1  | 12 | 0 | 1.46403142 | 0          | 5 | 3 | 0.00317045 | 0.93173516 |
| chr17 | 77303514 | 77361395 | 57882  | 1  | 12 | 0 | 1.81706455 | 0          | 4 | 3 | 0.00108487 | 0.93173516 |
| chr17 | 77361395 | 77361454 | 60     | 1  | 14 | 0 | 2.48919369 | 0          | 4 | 5 | 1.70E-04   | 1.60515106 |
| chr17 | 77361454 | 77400954 | 39501  | 1  | 13 | 0 | 2.13824703 | 0          | 4 | 5 | 4.45E-04   | 1.60515106 |
| chr17 | 77400954 | 77401013 | 60     | 1  | 13 | 0 | 2.13824703 | 0          | 4 | 6 | 4.45E-04   | 1.95986592 |
| chr17 | 77401013 | 77446901 | 45889  | 1  | 13 | 0 | 2.13824703 | 0          | 4 | 5 | 4.45E-04   | 1.60515106 |
| chr17 | 77446901 | 77446960 | 60     | 1  | 14 | 0 | 2.48919369 | 0          | 4 | 5 | 1.70E-04   | 1.60515106 |
| chr17 | 77446960 | 77545904 | 98945  | 1  | 12 | 0 | 1.81706455 | 0          | 4 | 5 | 0.0108487  | 1.60515106 |
| chr17 | 77545904 | 77545963 | 60     | 1  | 12 | 0 | 1.81706455 | 0          | 4 | 6 | 0.00108487 | 1.95986592 |
| chr17 | 77545963 | 77679973 | 134011 | 1  | 10 | 0 | 1.25681129 | 0          | 4 | 6 | 0.00530919 | 1.95986592 |
| chr17 | 77679973 | 77723251 | 43279  | 1  | 9  | 0 | 1.01542894 | 0          | 4 | 5 | 0.01077081 | 1.60515106 |
| chr17 | 77723251 | 77723310 | 60     | 1  | 10 | 0 | 1.25681129 | 0          | 4 | 5 | 0.00530919 | 1.60515106 |
| chr17 | 77723310 | 77770203 | 46894  | 1  | 9  | 0 | 1.01542894 | 0          | 4 | 5 | 0.01077081 | 1.60515106 |
| chr17 | 77770203 | 77770262 | 60     | 1  | 9  | 0 | 1.01542894 | 0          | 4 | 7 | 0.01077081 | 2.3278427  |
| chr17 | 77770262 | 77854335 | 84074  | 2  | 9  | 0 | 1.01542894 | 0          | 4 | 6 | 0.01077081 | 1.95986592 |
| chr17 | 77854335 | 77973643 | 119309 | 3  | 9  | 0 | 1.01542894 | 0          | 4 | 4 | 0.01077081 | 1.26272838 |
| chr17 | 77973643 | 77991759 | 18117  | 2  | 10 | 0 | 1.25681129 | 0          | 4 | 4 | 0.00530919 | 1.26272838 |
| chr17 | 77991759 | 78037899 | 46141  | 1  | 9  | 0 | 1.01542894 | 0          | 4 | 4 | 0.01077081 | 1.26272838 |
| chr17 | 78037899 | 78109158 | 71260  | 4  | 9  | 0 | 0.76806864 | 0          | 5 | 5 | 0.02473314 | 1.60515106 |
| chr17 | 78109158 | 78187257 | 78180  | 2  | 9  | 0 | 1.01542894 | 0          | 4 | 5 | 0.00377081 | 1.60515106 |
| chr17 | 78187257 | 78187311 | 55     | 1  | 11 | 0 | 1.20557689 | 0          | 5 | 5 | 0.00656883 | 1.60515106 |
| chr17 | 78187311 | 78221253 | 33043  | 2  | 10 | 0 | 0.76806864 | 0          | 5 | 5 | 0.02473314 | 1.60515106 |
| chr17 | 78221253 | 78260810 | 39558  | 2  | 10 | 0 | 0.97390707 | 0          | 5 | 5 | 0.01320236 | 1.60515106 |
| chr17 | 78260810 | 78283992 | 23183  | 2  | 13 | 0 | 1.42397267 | 0          | 6 | 5 | 0.00373523 | 1.60515106 |
| chr17 | 78283992 | 78310194 | 26203  | 2  | 14 | 0 | 1.70763027 | 0          | 6 | 5 | 0.00166733 | 1.60515106 |
| chr17 | 78310194 | 78367784 | 57591  | 3  | 14 | 1 | 1.70763027 | 0.00478973 | 6 | 5 | 0.00166733 | 1.26243191 |
| chr17 | 78367784 | 78390912 | 23129  | 2  | 16 | 1 | 2.37598969 | 0.00478973 | 6 | 5 | 2.57E-04   | 1.02643191 |
| chr17 | 78390912 | 78444169 | 53258  | 1  | 15 | 1 | 2.03872999 | 0.00478973 | 6 | 5 | 6.86E-04   | 1.02643191 |
| chr17 | 78444169 | 78460107 | 15939  | 2  | 15 | 1 | 1.68336308 | 0.00478973 | 7 | 5 | 0.00183109 | 1.02643191 |
| chr17 | 78460107 | 78460166 | 60     | 1  | 16 | 1 | 2.00316618 | 0.00478973 | 7 | 5 | 7.41E-04   | 1.02643191 |
| chr17 | 78460166 | 78741445 | 281280 | 5  | 14 | 1 | 1.39918918 | 0.00478973 | 7 | 5 | 0.00413023 | 1.02643191 |
| chr17 | 78741445 | 78796923 | 55479  | 3  | 16 | 1 | 2.00316618 | 0.00478973 | 7 | 5 | 7.41E-04   | 1.02643191 |
| chr17 | 78796923 | 78796979 | 57     | 1  | 18 | 1 | 2.76830915 | 0.00478973 | 7 | 5 | 8.69E-05   | 1.02643191 |
| chr17 | 78796979 | 78845849 | 48871  | 1  | 16 | 1 | 2.00316618 | 0.00478973 | 7 | 5 | 7.41E-04   | 1.02643191 |
| chr17 | 78845849 | 78935734 | 89886  | 5  | 17 | 1 | 2.36290411 | 0.00478973 | 7 | 5 | 2.70E-04   | 1.02643191 |
| chr17 | 78935734 | 78935793 | 60     | 1  | 18 | 1 | 2.76830915 | 0.00478973 | 7 | 5 | 8.69E-05   | 1.02643191 |
| chr17 | 78935793 | 78972208 | 36416  | 1  | 17 | 1 | 2.36290411 | 0.00478973 | 7 | 5 | 2.70E-04   | 1.02643191 |
| chr17 | 78972208 | 78972262 | 55     | 1  | 19 | 1 | 3.22720381 | 0.00478973 | 7 | 5 | 2.41E-05   | 1.02643191 |
| chr17 | 78972262 | 79000908 | 28647  | 1  | 17 | 1 | 2.76830915 | 0.00478973 | 6 | 5 | 8.69E-05   | 1.02643191 |
| chr17 | 79000908 | 79031850 | 30943  | 2  | 17 | 1 | 3.22720381 | 0.00478973 | 5 | 5 | 2.41E-05   | 1.02643191 |
| chr17 | 79031850 | 79054358 | 22509  | 2  | 18 | 1 | 3.20660496 | 0.00478973 | 6 | 5 | 2.59E-05   | 1.02643191 |
| chr17 | 79054358 | 79100092 | 45735  | 2  | 18 | 1 | 2.76830915 | 0.00478973 | 7 | 5 | 8.69E-05   | 1.02643191 |
| chr17 | 79100092 | 79119183 | 19092  | 1  | 17 | 1 | 2.36290411 | 0.00478973 | 7 | 5 | 2.70E-04   | 1.02643191 |
| chr17 | 79119183 | 79119241 | 59     | 1  | 17 | 1 | 2.00316618 | 0.00478973 | 8 | 5 | 7.41E-04   | 1.02643191 |
| chr17 | 79119241 | 79211846 | 92606  | 2  | 17 | 1 | 2.36290411 | 0.00478973 | 7 | 5 | 2.70E-04   | 1.02643191 |
| chr17 | 79211846 | 79211905 | 60     | 1  | 19 | 1 | 2.80176103 | 0.00478973 | 8 | 5 | 7.71E-05   | 1.02643191 |
| chr17 | 79211905 | 79240056 | 28152  | 2  | 16 | 1 | 2.00316618 | 0.00478973 | 7 | 5 | 7.41E-04   | 1.02643191 |
| chr17 | 79240056 | 79276598 | 36543  | 3  | 16 | 1 | 1.67551277 | 0.00478973 | 8 | 5 | 0.00188722 | 1.02643191 |
| chr17 | 79276598 | 79278428 | 1831   | 2  | 19 | 1 | 2.80176103 | 0.00478973 | 8 | 5 | 7.71E-05   | 1.02643191 |
| chr17 | 79278428 | 79413385 | 134958 | 3  | 18 | 1 | 2.76830915 | 0.00478973 | 7 | 5 | 8.69E-05   | 1.02643191 |
| chr17 | 79413385 | 79470000 | 56616  | 2  | 18 | 1 | 2.37598969 | 0.00478973 | 8 | 5 | 2.57E-04   | 1.02643191 |
| chr17 | 79470000 | 79774985 | 304986 | 12 | 18 | 1 | 2.03872999 | 0.00478973 | 9 | 5 | 6.86E-04   | 1.02643191 |
| chr17 | 79774985 | 79775044 | 60     | 1  | 19 | 1 | 2.41659593 | 0.00478973 | 9 | 5 | 2.22E-04   | 1.02643191 |
| chr17 | 79775044 | 79975488 | 200445 | 4  | 17 | 1 | 2.00316618 | 0.00478973 | 8 | 5 | 7.41E-04   | 1.02643191 |
| chr17 | 79975488 | 80015882 | 40395  | 2  | 17 | 1 | 2.36290411 | 0.00478973 | 7 | 5 | 2.70E-04   | 1.02643191 |
| chr17 | 80015882 | 80230386 | 214505 | 12 | 17 | 1 | 2.00316618 | 0.00478973 | 8 | 5 | 7.41E-04   | 1.02643191 |
| chr17 | 80230386 | 80286887 | 56502  | 2  | 15 | 1 | 1.3873209  | 0.00478973 | 7 | 5 | 0.00433294 | 1.02643191 |
| chr17 | 80286887 | 80445766 | 158880 | 8  | 14 | 1 | 1.39918918 | 0.00478973 | 8 | 5 | 0.00413023 | 1.02643191 |
| chr17 | 80445766 | 80445817 | 52     | 1  | 2  | 2 | 1.68336308 | 0.02162467 | 7 | 5 | 0.00183109 | 0.68214471 |
| chr17 | 80445817 | 80481025 | 35209  | 1  | 14 | 1 | 1.39918918 | 0.00478973 | 7 | 5 | 0.00413023 | 1.02643191 |
| chr17 | 80481025 | 80529672 | 48648  | 1  | 14 | 1 | 1.39918918 | 0.01091641 | 4 | 4 | 0.00413023 | 0.76005302 |
| chr17 | 80529672 | 80529729 | 58     | 1  | 15 | 1 | 1.3873209  | 0.01091641 | 8 | 4 | 0.00433294 | 0.76005302 |
| chr17 | 80529729 | 80596559 | 66831  | 3  | 12 | 1 | 0.91330805 | 0.01091641 | 8 | 4 | 0.01767679 | 0.76005302 |
| chr17 | 80596559 | 80680855 | 84297  | 2  | 12 | 1 | 0.92532268 | 0.01091641 | 4 | 4 | 0.01667721 | 0.76005302 |
| chr17 | 80680855 | 80680914 | 60     | 1  | 12 | 2 | 0.92532268 | 0.0429175  | 7 | 4 | 0.01667721 | 0.47744371 |
| chr17 | 80680914 | 80695764 | 14851  | 2  | 12 | 2 | 1.70738931 | 0.0429175  | 6 | 4 | 0.00778966 | 0.47744371 |
| chr17 | 80695764 | 80707119 | 11356  | 2  | 12 | 2 | 0.92532268 | 0.0429175  | 7 | 4 | 0.01667721 | 0.47744371 |
| chr17 | 80707119 | 80755696 | 48578  | 2  | 12 | 2 | 0.72109894 | 0.0429175  | 8 | 4 | 0.03209037 | 0.47744371 |
| chr17 | 80755696 | 80943189 | 187494 | 7  | 12 | 2 | 0.92532268 | 0.0429175  | 7 | 4 | 0.01667721 | 0.47744371 |
| chr17 | 80943189 | 80969424 | 26236  | 1  | 9  | 2 | 0.42015402 | 0.0429175  | 7 | 4 | 0.08584816 | 0.47744371 |
| chr17 | 80969424 | 81029941 | 60518  | 1  | 9  | 2 | 0.5732208  | 0.0429175  | 6 | 4 | 0.04875589 | 0.47744371 |
| chr18 | 14316    | 14375    | 60     | 1  | 2  | 0 | 0.08289318 | 0          | 3 | 0 | 0.30102999 | 0          |
| chr18 | 14375    | 198111   | 183737 | 2  | 1  | 0 | 0.02438896 | 0          | 3 | 0 | 0.51676182 | 0          |
| chr18 | 198111   | 236879   | 38769  | 2  | 2  | 0 | 0.0429175  | 0          | 4 | 0 | 0.47744371 | 0          |
| chr18 | 236879   | 363234   | 126556 | 2  | 1  | 0 | 0.02438896 | 0          | 3 | 0 | 0.51676182 | 0          |
| chr18 | 363234   | 528074   | 164841 | 5  | 1  | 0 | 0.00204627 | 0          | 6 | 0 | 1.31360226 | 0          |
| chr18 | 528074   | 628388   | 100315 | 3  | 1  | 0 | 0.00204627 | 0          | 6 | 1 | 1.31360226 | 0.30102999 |
| chr18 | 628388   | 704515   | 76128  | 2  | 1  | 0 | 0.00478973 | 0          | 5 | 1 | 1.02643191 | 0.30102999 |
| chr18 | 704515   | 704574   | 60     | 1  | 0  | 0 | 0.00204627 | 0          | 6 | 2 | 1.31360226 | 0.61140001 |
| chr18 | 704574   | 861334   | 156761 | 2  | 1  | 0 | 0.00478973 | 0          | 5 | 1 | 1.02643191 | 0.30102999 |
| chr18 | 861334   | 861393   | 60     | 1  | 0  | 0 | 0.00204627 | 0          | 6 | 2 | 1.31360226 | 0.61140001 |
| chr18 | 861393   | 981164   | 119772 | 2  | 1  | 0 | 0.00478973 | 0          | 5 | 2 | 1.02643191 | 0.61140001 |
| chr18 | 981164   | 981223   | 60     | 1  | 0  | 0 | 0.00204627 | 0          | 6 | 2 | 1.31360226 | 0.61140001 |
| chr18 | 981223   | 1191398  | 201076 | 3  | 1  | 0 | 0.00478973 | 0          | 5 | 2 | 1.02643191 | 0.61140001 |
| chr18 | 1191398  | 1191457  | 60     | 1  | 0  | 0 | 0.00204627 | 0          | 6 | 2 | 1.31360226 | 0.61140001 |
| chr18 | 1191457  | 1328033  | 136577 | 3  | 1  | 0 | 0.01091641 | 0          | 4 | 2 | 0.76005302 | 0.61140001 |
| chr18 | 1328033  | 1579586  | 251554 | 3  | 1  | 0 | 0.02438896 | 0          | 3 | 2 | 0.51676182 | 0.61140001 |
| chr18 | 1579586  | 1579645  | 60     | 1  | 1  | 0 | 0.01091641 | 0          | 4 | 2 | 0.76005302 | 0.61140001 |
| chr18 | 1579645  | 1684945  | 105301 | 2  | 1  | 0 | 0.05404976 | 0          | 2 | 2 | 0.30102999 | 0.61140001 |
| chr18 | 1684945  | 1685004  | 60     | 1  | 1  | 1 | 0.02438896 | 0.05404976 | 3 | 2 | 0.51676182 | 0.30102999 |
| chr18 | 1685004  | 1725284  | 40281  | 1  | 1  | 0 | 0.05404976 | 0.05404976 | 2 | 2 | 0.30102999 | 0.30102999 |
| chr18 | 1725284  | 1763991  | 38708  | 1  | 1  | 1 | 0.05404976 | 0.1218695  | 3 | 1 | 0.30102999 | 0.1218695  |
| chr18 | 1763991  | 1802439  | 38449  | 2  | 1  | 0 | 0.02438896 | 0.1218695  | 2 | 1 | 0.51676182 | 0.1218695  |

|       |          |          |        |   |   |   |            |            |    |            |            |            |
|-------|----------|----------|--------|---|---|---|------------|------------|----|------------|------------|------------|
| chr18 | 3724384  | 3844588  | 120205 | 2 | 2 | 1 | 0.0429175  | 0.05404976 | 4  | 2          | 0.47744371 | 0.30102999 |
| chr18 | 3844588  | 3899355  | 54768  | 2 | 2 | 1 | 0.00221948 | 0.05404976 | 8  | 2          | 1.44210395 | 0.30102999 |
| chr18 | 3899355  | 3954575  | 55221  | 1 | 1 | 1 | 3.39E-04   | 0.05404976 | 8  | 2          | 1.94674965 | 0.30102999 |
| chr18 | 3954575  | 3954634  | 60     | 1 | 1 | 1 | 4.80E-05   | 0.05404976 | 10 | 2          | 2.6588298  | 0.30102999 |
| chr18 | 3954634  | 4035471  | 80838  | 1 | 1 | 1 | 1.30E-04   | 0.05404976 | 9  | 2          | 2.29264207 | 0.30102999 |
| chr18 | 4035471  | 4035530  | 60     | 1 | 1 | 1 | 4.80E-05   | 0.05404976 | 10 | 2          | 2.6588298  | 0.30102999 |
| chr18 | 4035530  | 4184988  | 149459 | 2 | 1 | 1 | 0.00478973 | 0.05404976 | 5  | 2          | 1.02643191 | 0.30102999 |
| chr18 | 4184988  | 4290205  | 105218 | 1 | 1 | 1 | 0.01091641 | 0.05404976 | 4  | 2          | 0.76005302 | 0.30102999 |
| chr18 | 4290205  | 4562731  | 272527 | 4 | 1 | 0 | 0.02438896 | 0          | 3  | 0.51676182 | 0.61140001 |            |
| chr18 | 4562731  | 4562790  | 60     | 1 | 1 | 0 | 0.01091641 | 0          | 4  | 0.76005302 | 0.61140001 |            |
| chr18 | 4562790  | 4611794  | 49005  | 1 | 1 | 0 | 0.02438896 | 0          | 3  | 0.51676182 | 0.61140001 |            |
| chr18 | 4611794  | 4706194  | 94401  | 1 | 0 | 0 | 0          | 0          | 2  | 0.93173516 | 0.61140001 |            |
| chr18 | 4706194  | 4796671  | 90478  | 1 | 0 | 0 | 0          | 0          | 2  | 0.61140001 | 0.61140001 |            |
| chr18 | 4796671  | 4796730  | 60     | 1 | 1 | 1 | 0.02438896 | 0.05404976 | 3  | 2          | 0.51676182 | 0.30102999 |
| chr18 | 4796730  | 5055927  | 259198 | 3 | 1 | 0 | 0.05404976 | 0          | 2  | 0.30102999 | 0.61140001 |            |
| chr18 | 5055927  | 5290807  | 234881 | 6 | 1 | 1 | 0.05404976 | 0.05404976 | 2  | 2          | 0.30102999 | 0.30102999 |
| chr18 | 5290807  | 5458270  | 167464 | 2 | 0 | 1 | 0          | 0.05404976 | 2  | 2          | 0.61140001 | 0.30102999 |
| chr18 | 5458270  | 5523853  | 65584  | 3 | 1 | 1 | 0.05404976 | 0.05404976 | 2  | 2          | 0.30102999 | 0.30102999 |
| chr18 | 5523853  | 5709075  | 185233 | 2 | 1 | 0 | 0          | 0.05404976 | 2  | 2          | 0.61140001 | 0.30102999 |
| chr18 | 5709075  | 5953476  | 244402 | 2 | 0 | 1 | 0          | 0.1218695  | 2  | 1          | 0.61140001 | 0.1218695  |
| chr18 | 5953476  | 6030061  | 76486  | 3 | 0 | 2 | 0          | 0.1575501  | 3  | 2          | 0.93173516 | 0.1575501  |
| chr18 | 6030061  | 6030120  | 60     | 1 | 0 | 1 | 0          | 0.1575501  | 4  | 2          | 1.60815106 | 0.1575501  |
| chr18 | 6030120  | 6086667  | 56548  | 1 | 0 | 1 | 0          | 0.05404976 | 4  | 2          | 1.26272838 | 0.30102999 |
| chr18 | 6086667  | 6171252  | 84586  | 2 | 0 | 0 | 0          | 0          | 3  | 0.93173516 | 0.30102999 |            |
| chr18 | 6171252  | 6171311  | 60     | 1 | 1 | 0 | 0.05404976 | 0          | 4  | 1.26272838 | 0.30102999 |            |
| chr18 | 6171311  | 6395447  | 224137 | 4 | 0 | 0 | 0          | 0          | 3  | 0.93173516 | 0.30102999 |            |
| chr18 | 6395447  | 6542535  | 147089 | 3 | 0 | 1 | 0          | 0.1218695  | 3  | 1          | 0.93173516 | 0.1218695  |
| chr18 | 6542535  | 6542594  | 60     | 1 | 0 | 2 | 0          | 0.30102999 | 3  | 1          | 0.93173516 | 0.05404976 |
| chr18 | 6542594  | 6694807  | 152214 | 1 | 0 | 1 | 0          | 0.1218695  | 3  | 1          | 0.93173516 | 0.1218695  |
| chr18 | 6694807  | 6813026  | 118220 | 2 | 0 | 1 | 0          | 0.1218695  | 4  | 1          | 1.26272838 | 0.1218695  |
| chr18 | 6813026  | 6813085  | 60     | 1 | 0 | 2 | 0          | 0.30102999 | 4  | 1          | 1.26272838 | 0.05404976 |
| chr18 | 6813085  | 6858412  | 45328  | 2 | 0 | 2 | 0          | 0.30102999 | 1  | 1          | 0.30102999 | 0.05404976 |
| chr18 | 6858412  | 6959994  | 101583 | 3 | 0 | 1 | 0          | 0.1218695  | 1  | 1          | 0.30102999 | 0.1218695  |
| chr18 | 6959994  | 6997732  | 37739  | 2 | 0 | 1 | 0          | 0.1218695  | 4  | 1          | 1.26272838 | 0.1218695  |
| chr18 | 6997732  | 7112200  | 114469 | 2 | 0 | 1 | 0          | 0.1218695  | 3  | 1          | 0.93173516 | 0.1218695  |
| chr18 | 7112200  | 7157962  | 45763  | 1 | 0 | 1 | 0          | 0.1218695  | 2  | 1          | 0.61140001 | 0.1218695  |
| chr18 | 7157962  | 7244583  | 86622  | 1 | 0 | 1 | 0          | 0.30102999 | 1  | 0          | 0.30102999 | 0          |
| chr18 | 7244583  | 7290173  | 45591  | 2 | 0 | 1 | 0          | 0.30102999 | 2  | 0          | 0.61140001 | 0          |
| chr18 | 7290173  | 7290232  | 60     | 1 | 0 | 1 | 0          | 0.1218695  | 3  | 1          | 0.93173516 | 0.1218695  |
| chr18 | 7290232  | 7595519  | 305288 | 2 | 0 | 0 | 0          | 0.30102999 | 3  | 0          | 0.93173516 | 0          |
| chr18 | 7595519  | 7730661  | 135143 | 4 | 0 | 2 | 0          | 0.61140001 | 3  | 0          | 0.93173516 | 0          |
| chr18 | 7730661  | 7730720  | 60     | 1 | 0 | 2 | 0          | 0.61140001 | 4  | 0          | 1.26272838 | 0          |
| chr18 | 7730720  | 7877328  | 146609 | 3 | 0 | 2 | 0          | 0.61140001 | 3  | 0          | 0.93173516 | 0          |
| chr18 | 7877328  | 7877387  | 60     | 1 | 0 | 2 | 0          | 0.30102999 | 3  | 1          | 0.93173516 | 0.05404976 |
| chr18 | 7877387  | 8055875  | 178489 | 6 | 0 | 2 | 0          | 0.30102999 | 1  | 1          | 0.30102999 | 0.05404976 |
| chr18 | 8055875  | 8170867  | 114993 | 2 | 0 | 1 | 0          | 0.30102999 | 1  | 0          | 0.30102999 | 0          |
| chr18 | 8170867  | 8306657  | 135791 | 4 | 0 | 1 | 0          | 0.30102999 | 2  | 0          | 0.61140001 | 0          |
| chr18 | 8306657  | 8412487  | 105831 | 3 | 0 | 1 | 0          | 0.30102999 | 1  | 0          | 0.30102999 | 0          |
| chr18 | 8412487  | 8464701  | 52215  | 2 | 0 | 1 | 0          | 0.30102999 | 3  | 0          | 0.93173516 | 0          |
| chr18 | 8464701  | 8536769  | 72069  | 2 | 0 | 1 | 0          | 0.30102999 | 4  | 0          | 1.26272838 | 0          |
| chr18 | 8536769  | 8725120  | 188352 | 4 | 0 | 1 | 0.01091641 | 0.30102999 | 4  | 0          | 0.76005302 | 0          |
| chr18 | 8725120  | 9039372  | 314253 | 4 | 0 | 1 | 0          | 0.30102999 | 4  | 0          | 1.26272838 | 0          |
| chr18 | 9039372  | 9039431  | 60     | 1 | 2 | 1 | 0.00221948 | 0.1218695  | 8  | 1          | 1.44210395 | 0.1218695  |
| chr18 | 9039431  | 9109291  | 69861  | 1 | 1 | 1 | 0.00204627 | 0.1218695  | 6  | 1          | 1.31360226 | 0.1218695  |
| chr18 | 9109291  | 9109350  | 60     | 1 | 1 | 2 | 0.00204627 | 0.30102999 | 6  | 1          | 1.31360226 | 0.05404976 |
| chr18 | 9109350  | 9130344  | 20995  | 1 | 1 | 1 | 0.00204627 | 0.1218695  | 6  | 1          | 1.31360226 | 0.1218695  |
| chr18 | 9130344  | 9130403  | 60     | 1 | 1 | 1 | 8.47E-04   | 0.1218695  | 7  | 1          | 1.62048027 | 0.1218695  |
| chr18 | 9130403  | 9158020  | 27618  | 1 | 1 | 1 | 0.00204627 | 0.1218695  | 6  | 1          | 1.31360226 | 0.1218695  |
| chr18 | 9158020  | 9211705  | 53686  | 3 | 1 | 2 | 0.00204627 | 0.30102999 | 6  | 1          | 1.31360226 | 0.05404976 |
| chr18 | 9211705  | 9320833  | 109129 | 2 | 1 | 1 | 0.01091641 | 0.1218695  | 4  | 1          | 0.76005302 | 0.1218695  |
| chr18 | 9320833  | 9320892  | 60     | 1 | 1 | 1 | 8.47E-04   | 0.1218695  | 7  | 1          | 1.62048027 | 0.1218695  |
| chr18 | 9320892  | 9355850  | 34959  | 1 | 1 | 0 | 0.00204627 | 0.0        | 6  | 1          | 1.31360226 | 0.30102999 |
| chr18 | 9355850  | 9355909  | 60     | 1 | 1 | 0 | 8.47E-04   | 0          | 7  | 1          | 1.62048027 | 0.30102999 |
| chr18 | 9355909  | 9477315  | 121407 | 2 | 0 | 1 | 0.00204627 | 0.0        | 6  | 1          | 1.31360226 | 0.30102999 |
| chr18 | 9477315  | 9477374  | 60     | 1 | 0 | 1 | 8.47E-04   | 0          | 7  | 1          | 1.62048027 | 0.30102999 |
| chr18 | 9477374  | 9538006  | 60633  | 2 | 1 | 0 | 0.00478973 | 0          | 5  | 1          | 1.02643191 | 0.30102999 |
| chr18 | 9538006  | 9563361  | 25356  | 1 | 0 | 1 | 8.47E-04   | 0          | 7  | 1          | 1.62048027 | 0.30102999 |
| chr18 | 9563361  | 9593814  | 30454  | 2 | 1 | 1 | 0.00493743 | 0.1218695  | 7  | 1          | 1.16581773 | 0.1218695  |
| chr18 | 9593814  | 9645895  | 52082  | 2 | 1 | 0 | 8.47E-04   | 0          | 7  | 0          | 1.62048027 | 0          |
| chr18 | 9645895  | 9704285  | 58291  | 1 | 1 | 0 | 0.00204627 | 0          | 6  | 0          | 1.31360226 | 0          |
| chr18 | 9704285  | 9762318  | 58034  | 3 | 1 | 1 | 0.00204627 | 0.1218695  | 6  | 1          | 1.31360226 | 0.1218695  |
| chr18 | 9762318  | 9843884  | 81567  | 2 | 1 | 1 | 0.00478973 | 0.1218695  | 5  | 1          | 1.02643191 | 0.1218695  |
| chr18 | 9843884  | 9886016  | 42133  | 2 | 1 | 1 | 0.00204627 | 0.1218695  | 6  | 1          | 1.31360226 | 0.1218695  |
| chr18 | 9886016  | 9888578  | 2563   | 3 | 1 | 1 | 8.47E-04   | 0.1218695  | 7  | 1          | 1.62048027 | 0.1218695  |
| chr18 | 9888578  | 9920151  | 31574  | 1 | 1 | 1 | 0.00204627 | 0.1218695  | 6  | 1          | 1.31360226 | 0.1218695  |
| chr18 | 9920151  | 9946049  | 25899  | 2 | 2 | 1 | 0.01053319 | 0.1218695  | 6  | 1          | 0.91219088 | 0.1218695  |
| chr18 | 9946049  | 9946108  | 60     | 1 | 2 | 2 | 0.00493743 | 0.30102999 | 7  | 1          | 1.16581773 | 0.05404976 |
| chr18 | 9946108  | 10138890 | 192783 | 2 | 1 | 2 | 0.00204627 | 0.61140001 | 6  | 0          | 1.31360226 | 0          |
| chr18 | 10138890 | 10138949 | 60     | 1 | 1 | 2 | 0.00204627 | 0.30102999 | 6  | 1          | 1.31360226 | 0.05404976 |
| chr18 | 10138949 | 10240157 | 101209 | 1 | 0 | 2 | 0          | 0.30102999 | 6  | 1          | 1.95986592 | 0.05404976 |
| chr18 | 10240157 | 10240216 | 60     | 1 | 0 | 2 | 0          | 0.1575501  | 6  | 2          | 1.95986592 | 0.1575501  |
| chr18 | 10240216 | 10427143 | 186928 | 2 | 0 | 2 | 0          | 0.30102999 | 5  | 1          | 1.60515106 | 0.05404976 |
| chr18 | 10427143 | 10540301 | 113159 | 2 | 0 | 2 | 0          | 0.61140001 | 3  | 0          | 0.93173516 | 0          |
| chr18 | 10540301 | 10735390 | 195090 | 6 | 0 | 2 | 0          | 0.30102999 | 3  | 1          | 0.93173516 | 0.05404976 |
| chr18 | 10735390 | 10735449 | 60     | 1 | 1 | 2 | 0.02438896 | 0.30102999 | 3  | 1          | 0.51676182 | 0.05404976 |
| chr18 | 10735449 | 10855438 | 119990 | 3 | 0 | 1 | 0          | 0.1218695  | 2  | 1          | 0.61140001 | 0.1218695  |
| chr18 | 10855438 | 11075418 | 219981 | 5 | 0 | 1 | 0          | 0.1218695  | 1  | 1          | 0.30102999 | 0.1218695  |
| chr18 | 11075418 | 11075477 | 60     | 1 | 0 | 3 | 0          | 0.30102999 | 1  | 2          | 0.30102999 | 0.08289118 |
| chr18 | 11075477 | 11408767 | 333291 | 2 | 0 | 2 | 0          | 0.1575501  | 1  | 2          | 0.30102999 | 0.1575501  |
| chr18 | 11408767 | 11507040 | 98274  | 2 | 2 | 2 | 0.0429175  | 0.1575501  | 4  | 2          | 0.47744371 | 0.1575501  |
| chr18 | 11507040 | 11594848 | 87809  | 2 | 2 | 2 | 0.02162467 | 0.1575501  | 5  | 2          | 0.68214471 | 0.1575501  |
| chr18 | 11594848 | 11693002 | 98155  | 1 | 2 | 2 | 0.0429175  | 0.1575501  | 4  | 2          | 0.47744371 | 0.1575501  |
| chr18 | 11693002 | 11693061 | 60     | 1 | 2 | 2 | 0.02162467 | 0.1575501  | 5  | 2          | 0.68214471 | 0.1575501  |
| chr18 | 11693061 | 11734721 | 41661  | 1 | 2 | 2 | 0.0429175  | 0.1575501  | 4  | 2          | 0.47744371 | 0.1575501  |
| chr18 | 11734721 | 11734780 | 60     | 1 | 2 | 2 | 0.00493743 | 0.1575501  | 7  | 2          | 1.16581773 | 0.1575501  |
| chr18 | 11734780 | 11852138 | 117359 | 2 | 2 | 2 | 0.02162467 | 0.1575501  | 5  | 2          | 0.68214471 | 0.1575501  |
| chr18 | 11852138 | 11885059 | 32922  |   |   |   |            |            |    |            |            |            |

|       |          |          |        |   |   |   |            |            |    |   |            |            |
|-------|----------|----------|--------|---|---|---|------------|------------|----|---|------------|------------|
| chr18 | 1473811  | 14748636 | 14826  | 2 | 1 | 0 | 0.30102999 | 0          | 0  | 0 | 0          | 0          |
| chr18 | 18539853 | 18722048 | 182196 | 5 | 4 | 1 | 0.02074938 | 0.1218695  | 8  | 1 | 0.79906872 | 0.1218695  |
| chr18 | 18722048 | 18722107 | 60     | 1 | 5 | 1 | 0.04407651 | 0.1218695  | 8  | 1 | 0.58747015 | 0.1218695  |
| chr18 | 18722107 | 18800953 | 78847  | 2 | 4 | 1 | 0.02074938 | 0.1218695  | 8  | 1 | 0.79906872 | 0.1218695  |
| chr18 | 18800953 | 18883483 | 82531  | 3 | 4 | 1 | 0.01077081 | 0.1218695  | 9  | 1 | 1.01542894 | 0.1218695  |
| chr18 | 18883483 | 19125906 | 242424 | 6 | 5 | 1 | 0.01320236 | 0.1218695  | 10 | 1 | 0.97390707 | 0.1218695  |
| chr18 | 19125906 | 19283044 | 157139 | 7 | 5 | 1 | 0.01320236 | 0.05404976 | 10 | 2 | 0.97390707 | 0.30102999 |
| chr18 | 19283044 | 19383935 | 100892 | 2 | 5 | 1 | 0.01320236 | 0.1218695  | 10 | 1 | 0.97390707 | 0.1218695  |
| chr18 | 19383935 | 19554656 | 170722 | 7 | 6 | 1 | 0.01518174 | 0.05404976 | 11 | 2 | 0.9449689  | 0.30102999 |
| chr18 | 19554656 | 1958149  | 303494 | 4 | 6 | 1 | 0.04875589 | 0.05404976 | 9  | 2 | 0.5732208  | 0.30102999 |
| chr18 | 1958149  | 1958208  | 60     | 1 | 7 | 1 | 0.05232577 | 0.05404976 | 10 | 2 | 0.56314362 | 0.30102999 |
| chr18 | 1958208  | 19994555 | 136348 | 1 | 5 | 1 | 0.01320236 | 0.05404976 | 10 | 2 | 0.97390707 | 0.30102999 |
| chr18 | 19994555 | 19995026 | 472    | 3 | 5 | 1 | 0.00666883 | 0.05404976 | 11 | 2 | 1.20557689 | 0.30102999 |
| chr18 | 19995026 | 20072341 | 77316  | 1 | 5 | 1 | 0.01320236 | 0.05404976 | 10 | 2 | 0.97390707 | 0.30102999 |
| chr18 | 20072341 | 20204073 | 131733 | 1 | 5 | 1 | 0.07511598 | 0.05404976 | 7  | 2 | 0.43181735 | 0.30102999 |
| chr18 | 20204073 | 20204132 | 60     | 1 | 6 | 1 | 0.129913   | 0.05404976 | 7  | 2 | 0.30102999 | 0.30102999 |
| chr18 | 20204132 | 20373590 | 169459 | 2 | 6 | 1 | 0.20064824 | 0.05404976 | 6  | 2 | 0.20064824 | 0.30102999 |
| chr18 | 20373590 | 20606333 | 232744 | 3 | 6 | 1 | 0.20064824 | 0.05404976 | 6  | 2 | 0.20064824 | 0.61140001 |
| chr18 | 20606333 | 20606392 | 60     | 1 | 6 | 0 | 0.129913   | 0.05404976 | 7  | 2 | 0.30102999 | 0.30102999 |
| chr18 | 20606392 | 20714557 | 108186 | 1 | 5 | 1 | 0.12399573 | 0.05404976 | 6  | 2 | 0.30102999 | 0.30102999 |
| chr18 | 20714557 | 20739337 | 79381  | 2 | 5 | 1 | 0.12399573 | 0.1575501  | 6  | 2 | 0.30102999 | 0.1575501  |
| chr18 | 20739337 | 20739393 | 59     | 1 | 5 | 1 | 0.07511598 | 0.1575501  | 7  | 2 | 0.43181735 | 0.1575501  |
| chr18 | 20739393 | 20950175 | 156181 | 3 | 4 | 2 | 0.03812622 | 0.1575501  | 7  | 2 | 0.60763643 | 0.1575501  |
| chr18 | 20950175 | 20950231 | 57     | 1 | 5 | 2 | 0.07511598 | 0.1575501  | 7  | 2 | 0.43181735 | 0.1575501  |
| chr18 | 20950231 | 21057176 | 106946 | 4 | 4 | 2 | 0.03812622 | 0.1575501  | 7  | 2 | 0.60763643 | 0.1575501  |
| chr18 | 21057176 | 21171865 | 114690 | 2 | 4 | 2 | 0.03812622 | 0.30102999 | 7  | 1 | 0.60763643 | 0.05404976 |
| chr18 | 21171865 | 21302069 | 130205 | 4 | 4 | 2 | 0.06713722 | 0.30102999 | 6  | 1 | 0.44141547 | 0.05404976 |
| chr18 | 21302069 | 21506372 | 204304 | 3 | 4 | 2 | 0.03812622 | 0.30102999 | 7  | 1 | 0.60763643 | 0.05404976 |
| chr18 | 21506372 | 21596298 | 89370  | 2 | 4 | 2 | 0.11390336 | 0.61140001 | 5  | 0 | 0.30102999 | 0.05404976 |
| chr18 | 21596298 | 21600113 | 3816   | 2 | 4 | 2 | 0.11390336 | 0.30102999 | 5  | 1 | 0.30102999 | 0.05404976 |
| chr18 | 21600113 | 21659193 | 59081  | 3 | 4 | 2 | 0.11390336 | 0.61140001 | 5  | 0 | 0.30102999 | 0.05404976 |
| chr18 | 21659193 | 21659252 | 60     | 1 | 4 | 2 | 0.11390336 | 0.30102999 | 5  | 1 | 0.30102999 | 0.05404976 |
| chr18 | 21659252 | 21860868 | 201617 | 5 | 4 | 2 | 0.11390336 | 0.61140001 | 5  | 0 | 0.30102999 | 0.05404976 |
| chr18 | 21860868 | 21888499 | 27632  | 2 | 4 | 2 | 0.11390336 | 0.30102999 | 5  | 1 | 0.30102999 | 0.05404976 |
| chr18 | 21888499 | 22059380 | 170882 | 6 | 4 | 2 | 0.11390336 | 0.1575501  | 5  | 2 | 0.30102999 | 0.1575501  |
| chr18 | 22059380 | 22325295 | 265916 | 2 | 2 | 2 | 0.02162467 | 0.61140001 | 5  | 0 | 0.68214471 | 0.1575501  |
| chr18 | 22325295 | 22325354 | 60     | 1 | 3 | 2 | 0.03070643 | 0.61140001 | 6  | 0 | 0.63695542 | 0.1575501  |
| chr18 | 22325354 | 22400184 | 74831  | 1 | 3 | 2 | 0.05670724 | 0.61140001 | 5  | 0 | 0.45545077 | 0.1575501  |
| chr18 | 22400184 | 22560942 | 160759 | 1 | 2 | 1 | 0.1575501  | 0.30102999 | 2  | 0 | 0.1575501  | 0          |
| chr18 | 22560942 | 22642262 | 81321  | 1 | 1 | 1 | 0.1218695  | 0.30102999 | 1  | 0 | 0.1218695  | 0          |
| chr18 | 22642262 | 22766517 | 124256 | 4 | 2 | 1 | 0.30102999 | 0.30102999 | 1  | 0 | 0.05404976 | 0          |
| chr18 | 22766517 | 22863670 | 97154  | 3 | 2 | 2 | 0.30102999 | 0.61140001 | 1  | 0 | 0.05404976 | 0          |
| chr18 | 22863670 | 23022716 | 159047 | 4 | 2 | 2 | 0.1575501  | 0.61140001 | 2  | 0 | 0.1575501  | 0          |
| chr18 | 23022716 | 23277883 | 255168 | 1 | 2 | 0 | 0.1575501  | 0          | 2  | 0 | 0.1575501  | 0          |
| chr18 | 23277883 | 23380213 | 102331 | 2 | 2 | 0 | 0.0429175  | 0          | 4  | 0 | 0.47744371 | 0          |
| chr18 | 23380213 | 23492650 | 112438 | 2 | 2 | 1 | 0.0429175  | 0.30102999 | 4  | 0 | 0.47744371 | 0          |
| chr18 | 23492650 | 23492709 | 60     | 1 | 3 | 1 | 0.01598258 | 0.30102999 | 7  | 0 | 0.84395715 | 0          |
| chr18 | 23492709 | 23612422 | 119714 | 1 | 3 | 0 | 0.05670724 | 0          | 5  | 0 | 0.45545077 | 0          |
| chr18 | 23612422 | 23622760 | 10339  | 2 | 4 | 1 | 0.11390336 | 0.30102999 | 5  | 0 | 0.30102999 | 0          |
| chr18 | 23622760 | 23672685 | 49926  | 1 | 2 | 1 | 0.10122019 | 0.30102999 | 4  | 0 | 0.30102999 | 0          |
| chr18 | 23672685 | 23715893 | 43209  | 2 | 3 | 1 | 0.10122019 | 0.1218695  | 4  | 1 | 0.30102999 | 0          |
| chr18 | 23715893 | 23804776 | 88884  | 4 | 4 | 2 | 0.18734596 | 0.30102999 | 4  | 1 | 0.18734596 | 0.05404976 |
| chr18 | 23804776 | 23918871 | 114096 | 3 | 4 | 1 | 0.18734596 | 0.1218695  | 4  | 1 | 0.18734596 | 0.1218695  |
| chr18 | 23918871 | 23936798 | 17928  | 2 | 5 | 1 | 0.19510895 | 0.1218695  | 5  | 1 | 0.19510895 | 0.1218695  |
| chr18 | 23936798 | 24323593 | 386796 | 9 | 5 | 2 | 0.19510895 | 0.30102999 | 5  | 1 | 0.19510895 | 0.05404976 |
| chr18 | 24323593 | 24493543 | 169951 | 3 | 4 | 2 | 0.18734596 | 0.30102999 | 4  | 1 | 0.18734596 | 0.05404976 |
| chr18 | 24493543 | 24503483 | 9941   | 3 | 5 | 2 | 0.30102999 | 0.30102999 | 4  | 1 | 0.11390336 | 0.05404976 |
| chr18 | 24503483 | 24628433 | 124951 | 3 | 3 | 2 | 0.17593012 | 0.30102999 | 3  | 1 | 0.17593012 | 0.05404976 |
| chr18 | 24628433 | 24655661 | 27229  | 2 | 3 | 2 | 0.45545077 | 0.1575501  | 3  | 2 | 0.05670724 | 0.1575501  |
| chr18 | 24655661 | 24756700 | 101040 | 2 | 3 | 2 | 0.17593012 | 0.30102999 | 3  | 1 | 0.17593012 | 0.05404976 |
| chr18 | 24756700 | 24832110 | 75411  | 2 | 4 | 2 | 0.30102999 | 0.30102999 | 3  | 1 | 0.10122019 | 0.05404976 |
| chr18 | 24832110 | 24832169 | 60     | 1 | 5 | 2 | 0.30102999 | 0.30102999 | 4  | 1 | 0.11390336 | 0.05404976 |
| chr18 | 24832169 | 25029649 | 197481 | 3 | 3 | 2 | 0.17593012 | 0.30102999 | 3  | 1 | 0.17593012 | 0.05404976 |
| chr18 | 25029649 | 25119974 | 90326  | 2 | 3 | 2 | 0.30102999 | 0.30102999 | 2  | 1 | 0.08289318 | 0.05404976 |
| chr18 | 25119974 | 25237386 | 117413 | 1 | 2 | 1 | 0.1575501  | 0.30102999 | 2  | 1 | 0.1575501  | 0.05404976 |
| chr18 | 25237386 | 25327445 | 60     | 1 | 3 | 2 | 0.1575501  | 0.51676182 | 2  | 1 | 0.1575501  | 0.02438896 |
| chr18 | 25327445 | 25508581 | 271137 | 1 | 3 | 3 | 0.05404976 | 0.1575501  | 2  | 1 | 0.05404976 | 0.02438896 |
| chr18 | 25508581 | 25565559 | 56979  | 1 | 3 | 3 | 0.1575501  | 0.51676182 | 2  | 1 | 0.1575501  | 0.02438896 |
| chr18 | 25565559 | 25665990 | 100432 | 2 | 0 | 2 | 0.30102999 | 0.30102999 | 1  | 1 | 0.30102999 | 0.05404976 |
| chr18 | 25665990 | 25727668 | 61679  | 1 | 2 | 1 | 0.1218695  | 0.30102999 | 1  | 1 | 0.1218695  | 0.05404976 |
| chr18 | 25727668 | 25727724 | 57     | 1 | 2 | 1 | 0.30102999 | 0.30102999 | 1  | 1 | 0.05404976 | 0.05404976 |
| chr18 | 25727724 | 25798949 | 252126 | 3 | 1 | 2 | 0.1218695  | 0.30102999 | 1  | 1 | 0.1218695  | 0.05404976 |
| chr18 | 25798949 | 25799008 | 60     | 1 | 3 | 1 | 0.1218695  | 0.51676182 | 1  | 1 | 0.1218695  | 0.02438896 |
| chr18 | 25799008 | 26255699 | 275792 | 2 | 0 | 3 | 0          | 0.51676182 | 0  | 1 | 0          | 0.02438896 |
| chr18 | 26255699 | 26396738 | 141040 | 1 | 0 | 2 | 0          | 0.30102999 | 0  | 1 | 0          | 0.05404976 |
| chr18 | 26396738 | 26659319 | 262582 | 1 | 0 | 2 | 0          | 0.61140001 | 0  | 0 | 0          | 0          |
| chr18 | 26659319 | 26736765 | 77447  | 2 | 1 | 2 | 0.1218695  | 0.61140001 | 1  | 0 | 0.1218695  | 0          |
| chr18 | 26736765 | 26902630 | 165866 | 2 | 0 | 2 | 0          | 0.61140001 | 1  | 0 | 0.30102999 | 0          |
| chr18 | 26902630 | 27015815 | 113186 | 2 | 0 | 2 | 0          | 0.61140001 | 2  | 0 | 0.61140001 | 0          |
| chr18 | 27015815 | 27015874 | 60     | 1 | 0 | 3 | 0          | 0.30102999 | 2  | 2 | 0.61140001 | 0.08289318 |
| chr18 | 27015874 | 27095814 | 79941  | 1 | 0 | 3 | 0          | 0.30102999 | 1  | 2 | 0.30102999 | 0.08289318 |
| chr18 | 27095814 | 27299840 | 204027 | 1 | 0 | 3 | 0          | 0.51676182 | 1  | 1 | 0.30102999 | 0.02438896 |
| chr18 | 27299840 | 27580185 | 280346 | 2 | 0 | 1 | 0          | 0.1218695  | 1  | 1 | 0.30102999 | 0.1218695  |
| chr18 | 27580185 | 27681879 | 101695 | 1 | 0 | 1 | 0          | 0.30102999 | 1  | 0 | 0.30102999 | 0          |
| chr18 | 27681879 | 27828604 | 146726 | 2 | 0 | 2 | 0          | 0.61140001 | 1  | 0 | 0.30102999 | 0          |
| chr18 | 27828604 | 27828663 | 60     | 1 | 1 | 4 | 0.02438896 | 0.76005302 | 3  | 1 | 0.51676182 | 0.01091641 |
| chr18 | 27828663 | 27890123 | 61461  | 1 | 0 | 2 | 0          | 0.61140001 | 1  | 0 | 0.30102999 | 0          |
| chr18 | 27890123 | 28080271 | 190149 | 1 | 0 | 2 | 0          | 0.61140001 | 0  | 0 | 0          | 0          |
| chr18 | 28080271 | 28354894 | 274624 | 3 | 1 | 5 | 0.02438896 | 1.02643191 | 3  | 1 | 0.51676182 | 0.00478973 |
| chr18 | 28354894 | 28354953 | 60     | 1 | 1 | 7 | 0.02438896 | 1.62048027 | 3  | 1 | 0.51676182 | 8.47E-04   |
| chr18 | 28354953 | 28515102 | 160150 | 1 | 1 | 4 | 0.02438896 | 0.76005302 | 3  | 1 | 0.51676182 | 0.01091641 |
| chr18 | 28515102 | 28515161 | 60     | 1 | 1 | 5 | 0.02438896 | 0.68214471 | 3  | 2 | 0.51676182 | 0.02162467 |
| chr18 | 28515161 | 28       |        |   |   |   |            |            |    |   |            |            |



|       |          |          |        |    |   |    |            |            |   |   |            |            |
|-------|----------|----------|--------|----|---|----|------------|------------|---|---|------------|------------|
| chr18 | 30577046 | 30670609 | 93564  | 2  | 2 | 6  | 0.08289318 | 0.63695542 | 3 | 3 | 0.30102999 | 0.03070643 |
| chr18 | 30670609 | 30751328 | 87020  | 2  | 2 | 5  | 0.08289318 | 0.68214471 | 3 | 2 | 0.30102999 | 0.02162467 |
| chr18 | 30751328 | 30927873 | 176546 | 4  | 2 | 5  | 0.08289318 | 1.02643191 | 1 | 1 | 0.30102999 | 0.00478973 |
| chr18 | 30927873 | 30927932 | 60     | 1  | 3 | 5  | 0.17593012 | 0.68214471 | 3 | 2 | 0.17593012 | 0.02162467 |
| chr18 | 30927932 | 30969571 | 41640  | 1  | 3 | 5  | 0.30102999 | 1.02643191 | 2 | 1 | 0.08289318 | 0.00478973 |
| chr18 | 30969571 | 31180926 | 211356 | 2  | 2 | 5  | 0.1755501  | 1.02643191 | 1 | 1 | 0.1755501  | 0.00478973 |
| chr18 | 31180926 | 31239316 | 58391  | 2  | 3 | 5  | 0.30102999 | 0.68214471 | 2 | 2 | 0.08289318 | 0.02162467 |
| chr18 | 31239316 | 31266730 | 27415  | 1  | 2 | 5  | 0.1755501  | 0.68214471 | 2 | 1 | 0.1755501  | 0.02162467 |
| chr18 | 31266730 | 31266789 | 60     | 1  | 2 | 6  | 0.08289318 | 0.63695542 | 3 | 3 | 0.30102999 | 0.03070643 |
| chr18 | 31266789 | 31342677 | 165889 | 2  | 2 | 6  | 0.08289318 | 0.91219088 | 3 | 2 | 0.30102999 | 0.01053319 |
| chr18 | 31342677 | 31496939 | 64263  | 2  | 2 | 6  | 0.08289318 | 0.44141547 | 3 | 4 | 0.30102999 | 0.06713722 |
| chr18 | 31496939 | 31599286 | 102348 | 2  | 2 | 6  | 0.08289318 | 0.63695542 | 3 | 3 | 0.30102999 | 0.03070643 |
| chr18 | 31599286 | 31599343 | 58     | 1  | 2 | 6  | 0.08289318 | 0.44141547 | 3 | 4 | 0.30102999 | 0.06713722 |
| chr18 | 31599343 | 31673563 | 74221  | 1  | 2 | 6  | 0.08289318 | 0.63695542 | 3 | 3 | 0.30102999 | 0.03070643 |
| chr18 | 31673563 | 31730147 | 56585  | 1  | 2 | 6  | 0.30102999 | 0.63695542 | 3 | 3 | 0.05404976 | 0.03070643 |
| chr18 | 31730147 | 31775712 | 45566  | 2  | 2 | 6  | 0.30102999 | 0.44141547 | 1 | 4 | 0.05404976 | 0.06713722 |
| chr18 | 31775712 | 31775771 | 60     | 1  | 2 | 6  | 0.30102999 | 0.20064824 | 1 | 6 | 0.05404976 | 0.20064824 |
| chr18 | 31775771 | 31923705 | 147935 | 1  | 2 | 5  | 0.61140001 | 0.12309572 | 0 | 0 | 0          | 0.30102999 |
| chr18 | 31923705 | 32241257 | 317553 | 5  | 2 | 5  | 0.61140001 | 0.19510895 | 0 | 5 | 0          | 0.19510895 |
| chr18 | 32241257 | 32241316 | 60     | 1  | 2 | 5  | 0.30102999 | 0.19510895 | 1 | 5 | 0.05404976 | 0.19510895 |
| chr18 | 32241316 | 32280276 | 48961  | 1  | 2 | 5  | 0.61140001 | 0.19510895 | 0 | 5 | 0          | 0.19510895 |
| chr18 | 32280276 | 32344577 | 54302  | 2  | 2 | 6  | 0.61140001 | 0.20064824 | 0 | 0 | 0          | 0.20064824 |
| chr18 | 32344577 | 32398612 | 54036  | 2  | 2 | 6  | 0.93173516 | 0.20064824 | 0 | 0 | 0          | 0.20064824 |
| chr18 | 32398612 | 32515173 | 116562 | 2  | 1 | 5  | 0.30102999 | 0.19510895 | 0 | 5 | 0          | 0.19510895 |
| chr18 | 32515173 | 32515232 | 60     | 1  | 2 | 6  | 0.61140001 | 0.20064824 | 0 | 6 | 0          | 0.20064824 |
| chr18 | 32515232 | 32630326 | 115095 | 1  | 6 | 6  | 0.30102999 | 0.20064824 | 0 | 6 | 0          | 0.20064824 |
| chr18 | 32630326 | 32630385 | 60     | 1  | 1 | 6  | 0.1218695  | 0.20064824 | 1 | 6 | 0.1218695  | 0.20064824 |
| chr18 | 32630385 | 32695115 | 64731  | 1  | 6 | 6  | 0.1218695  | 0.30102999 | 1 | 5 | 0.1218695  | 0.12309572 |
| chr18 | 32695115 | 32695174 | 60     | 1  | 2 | 5  | 0.1755501  | 0.30102999 | 2 | 5 | 0.1755501  | 0.12309572 |
| chr18 | 32695174 | 32706973 | 118001 | 1  | 6 | 6  | 0.05404976 | 0.30102999 | 2 | 5 | 0.30102999 | 0.12309572 |
| chr18 | 32706973 | 32707243 | 271    | 2  | 1 | 6  | 0.05404976 | 0.20064824 | 2 | 6 | 0.30102999 | 0.20064824 |
| chr18 | 32707243 | 32770892 | 63650  | 1  | 6 | 6  | 0.1218695  | 0.20064824 | 1 | 6 | 0.1218695  | 0.20064824 |
| chr18 | 32770892 | 32833207 | 62316  | 2  | 1 | 6  | 0.05404976 | 0.20064824 | 2 | 6 | 0.30102999 | 0.20064824 |
| chr18 | 32833207 | 32919005 | 85799  | 2  | 1 | 5  | 0.1218695  | 0.12309572 | 1 | 6 | 0.1218695  | 0.30102999 |
| chr18 | 32919005 | 32919064 | 60     | 1  | 2 | 7  | 0.1755501  | 0.30102999 | 2 | 6 | 0.1755501  | 0.129913   |
| chr18 | 32919064 | 33052910 | 133847 | 4  | 2 | 4  | 0.1755501  | 0.19510895 | 2 | 5 | 0.1755501  | 0.19510895 |
| chr18 | 33052910 | 33052969 | 60     | 1  | 3 | 5  | 0.17593012 | 0.12309572 | 3 | 6 | 0.17593012 | 0.30102999 |
| chr18 | 33052969 | 33158481 | 105513 | 1  | 2 | 5  | 0.1755501  | 0.12309572 | 2 | 6 | 0.1755501  | 0.30102999 |
| chr18 | 33158481 | 33243695 | 85215  | 2  | 1 | 5  | 0.05404976 | 0.12309572 | 2 | 6 | 0.30102999 | 0.30102999 |
| chr18 | 33243695 | 33289988 | 46294  | 2  | 2 | 2  | 0.1755501  | 0.12309572 | 2 | 6 | 0.1755501  | 0.30102999 |
| chr18 | 33289988 | 33467118 | 177131 | 1  | 1 | 5  | 0.05404976 | 0.12309572 | 2 | 6 | 0.30102999 | 0.30102999 |
| chr18 | 33467118 | 33597627 | 130510 | 4  | 2 | 2  | 0.1755501  | 0.12309572 | 2 | 6 | 0.1755501  | 0.30102999 |
| chr18 | 33597627 | 33691071 | 93445  | 3  | 1 | 5  | 0.05404976 | 0.12309572 | 2 | 6 | 0.30102999 | 0.30102999 |
| chr18 | 33691071 | 33691130 | 60     | 1  | 2 | 5  | 0.1755501  | 0.12309572 | 1 | 2 | 0.1755501  | 0.30102999 |
| chr18 | 33691130 | 33747053 | 55924  | 2  | 1 | 5  | 0.05404976 | 0.12309572 | 2 | 6 | 0.30102999 | 0.30102999 |
| chr18 | 33747053 | 34229775 | 482723 | 10 | 2 | 2  | 0.1755501  | 0.12309572 | 2 | 2 | 0.1755501  | 0.30102999 |
| chr18 | 34229775 | 34462665 | 232891 | 6  | 2 | 4  | 0.1755501  | 0.06713722 | 2 | 6 | 0.1755501  | 0.44141547 |
| chr18 | 34462665 | 34576844 | 114180 | 2  | 2 | 4  | 0.1755501  | 0.18734596 | 2 | 4 | 0.1755501  | 0.18734596 |
| chr18 | 34576844 | 34576903 | 60     | 1  | 2 | 4  | 0.1755501  | 0.11390336 | 2 | 5 | 0.1755501  | 0.30102999 |
| chr18 | 34576903 | 34959559 | 382657 | 10 | 2 | 4  | 0.1755501  | 0.18734596 | 2 | 4 | 0.1755501  | 0.18734596 |
| chr18 | 34959559 | 34959618 | 60     | 1  | 2 | 4  | 0.1755501  | 0.11390336 | 2 | 5 | 0.1755501  | 0.30102999 |
| chr18 | 34959618 | 35022346 | 62729  | 1  | 2 | 4  | 0.30102999 | 0.11390336 | 1 | 5 | 0.05404976 | 0.30102999 |
| chr18 | 35022346 | 35199332 | 176987 | 3  | 2 | 3  | 0.30102999 | 0.05670724 | 1 | 5 | 0.05404976 | 0.45545077 |
| chr18 | 35199332 | 35329908 | 130577 | 1  | 2 | 3  | 0.30102999 | 0.10122019 | 1 | 4 | 0.05404976 | 0.30102999 |
| chr18 | 35329908 | 35493434 | 163527 | 1  | 2 | 3  | 0.30102999 | 0.17593012 | 1 | 3 | 0.05404976 | 0.17593012 |
| chr18 | 35493434 | 35643511 | 150078 | 1  | 2 | 3  | 0.61140001 | 0.17593012 | 0 | 3 | 0          | 0.17593012 |
| chr18 | 35643511 | 35643570 | 60     | 1  | 2 | 4  | 0.61140001 | 0.18734596 | 4 | 0 | 0          | 0.18734596 |
| chr18 | 35643570 | 35865331 | 221762 | 1  | 0 | 4  | 0          | 0.30102999 | 0 | 3 | 0          | 0.10120219 |
| chr18 | 35865331 | 35865390 | 60     | 1  | 1 | 5  | 0.30102999 | 0.45545077 | 0 | 3 | 0          | 0.05670724 |
| chr18 | 35865390 | 36020483 | 155094 | 1  | 1 | 1  | 0.30102999 | 0.30102999 | 0 | 2 | 0          | 0.08289318 |
| chr18 | 36020483 | 36173548 | 153066 | 1  | 1 | 2  | 0.30102999 | 0.61140001 | 0 | 0 | 0          | 0          |
| chr18 | 36173548 | 36374692 | 201145 | 1  | 0 | 2  | 0          | 0.61140001 | 0 | 0 | 0          | 0          |
| chr18 | 36374692 | 36460875 | 86184  | 0  | 3 | 0  | 0          | 0.51676182 | 0 | 1 | 0          | 0.02438896 |
| chr18 | 36460875 | 36460934 | 60     | 1  | 0 | 3  | 0          | 0.17593012 | 0 | 3 | 0          | 0.17593012 |
| chr18 | 36460934 | 36693609 | 232676 | 2  | 0 | 3  | 0          | 0.17593012 | 0 | 2 | 0          | 0.08289318 |
| chr18 | 36693609 | 36693668 | 60     | 1  | 0 | 3  | 0          | 0.30102999 | 0 | 3 | 0          | 0.17593012 |
| chr18 | 36693668 | 37063132 | 369465 | 5  | 0 | 0  | 0          | 0.30102999 | 0 | 2 | 0          | 0.08289318 |
| chr18 | 37063132 | 37206125 | 142994 | 3  | 0 | 3  | 0          | 0.30102999 | 0 | 1 | 0          | 0.08289318 |
| chr18 | 37206125 | 37493510 | 287386 | 7  | 1 | 3  | 0.1218695  | 0.30102999 | 1 | 2 | 0.1218695  | 0.08289318 |
| chr18 | 37493510 | 37787356 | 293847 | 3  | 0 | 3  | 0          | 0.30102999 | 0 | 2 | 0          | 0.08289318 |
| chr18 | 37787356 | 38170810 | 383455 | 2  | 0 | 2  | 0          | 0.1755501  | 0 | 1 | 0          | 0.1755501  |
| chr18 | 38170810 | 38709704 | 538895 | 4  | 0 | 1  | 0          | 0.1218695  | 0 | 1 | 0          | 0.1218695  |
| chr18 | 38709704 | 38785471 | 27568  | 2  | 0 | 2  | 0          | 0.1755501  | 0 | 1 | 0.30102999 | 0.1755501  |
| chr18 | 38785471 | 38972042 | 186572 | 1  | 0 | 2  | 0          | 0.1755501  | 0 | 2 | 0          | 0.1755501  |
| chr18 | 38972042 | 39083536 | 111495 | 2  | 0 | 0  | 0          | 0.68214471 | 0 | 2 | 0          | 0.02162467 |
| chr18 | 39083536 | 39083595 | 60     | 1  | 0 | 6  | 0          | 0.91219088 | 0 | 2 | 0          | 0.01053319 |
| chr18 | 39083595 | 39180140 | 96546  | 1  | 0 | 5  | 0          | 0.68214471 | 0 | 0 | 0          | 0.02162467 |
| chr18 | 39180140 | 39302846 | 122707 | 2  | 0 | 5  | 0          | 0.45545077 | 0 | 0 | 0          | 0.05670724 |
| chr18 | 39302846 | 39600614 | 297769 | 4  | 0 | 4  | 0          | 0.47744371 | 0 | 0 | 0          | 0.0429175  |
| chr18 | 39600614 | 39661149 | 60536  | 3  | 0 | 4  | 0          | 0.30102999 | 0 | 3 | 0          | 0.10122019 |
| chr18 | 39661149 | 39792312 | 131164 | 3  | 0 | 5  | 0          | 0.45545077 | 0 | 0 | 0          | 0.05670724 |
| chr18 | 39792312 | 39867556 | 75245  | 2  | 0 | 6  | 0          | 0.63695542 | 0 | 3 | 0          | 0.03070643 |
| chr18 | 39867556 | 40034862 | 167307 | 3  | 0 | 9  | 0          | 1.33111237 | 0 | 0 | 0          | 0.00378107 |
| chr18 | 40034862 | 40034921 | 60     | 1  | 0 | 11 | 0          | 1.91540774 | 0 | 0 | 0          | 7.2E-04    |
| chr18 | 40034921 | 40154838 | 119918 | 1  | 0 | 9  | 0          | 1.33111237 | 0 | 3 | 0          | 0.00378107 |
| chr18 | 40154838 | 40364127 | 209290 | 3  | 0 | 7  | 0          | 1.16581773 | 0 | 0 | 0          | 0.00493743 |
| chr18 | 40364127 | 40430921 | 66795  | 2  | 0 | 5  | 0          | 0.68214471 | 0 | 2 | 0          | 0.02162467 |
| chr18 | 40430921 | 40613765 | 182845 | 3  | 0 | 4  | 0          | 0.47744371 | 0 | 2 | 0          | 0.0429175  |
| chr18 | 40613765 | 40644164 | 30400  | 2  | 0 | 2  | 0          | 0.68214471 | 0 | 2 | 0          | 0.02162467 |
| chr18 | 40644164 | 40644223 | 60     | 1  | 0 | 6  | 0          | 0.44141547 | 0 | 0 | 0          | 0.06713722 |
| chr18 | 40644223 | 40932353 | 288131 | 5  | 0 | 5  | 0          | 0.30102999 | 0 | 4 | 0          | 0.11390336 |
| chr18 | 40932353 | 41143464 | 21112  | 2  | 0 | 4  | 0          | 0.47744371 | 0 | 2 | 0          | 0.0429175  |
| chr18 | 41143464 | 41143523 | 60     | 1  | 0 | 4  | 0          | 0.30102999 | 0 | 3 | 0          | 0.10122019 |
| chr18 | 41143523 | 41221772 | 78250  | 1  | 0 | 4  | 0          | 0.47744371 | 0 | 2 | 0          | 0.0429175  |
| chr18 | 41221772 | 41402003 | 180232 | 1  | 0 | 3  | 0          | 0.30       |   |   |            |            |

|       |          |          |        |   |   |   |            |            |   |   |            |            |
|-------|----------|----------|--------|---|---|---|------------|------------|---|---|------------|------------|
| chr18 | 43563610 | 43618467 | 54858  | 1 | 1 | 3 | 0.02438896 | 0.05670724 | 3 | 5 | 0.51676182 | 0.45545077 |
| chr18 | 43618467 | 43618526 | 60     | 1 | 1 | 3 | 0.02438896 | 0.03070643 | 3 | 6 | 0.51676182 | 0.63695542 |
| chr18 | 43618526 | 43677035 | 58510  | 2 | 1 | 3 | 0.02438896 | 0.05670724 | 3 | 5 | 0.51676182 | 0.45545077 |
| chr18 | 43677035 | 43687665 | 10631  | 1 | 1 | 3 | 0.02438896 | 0.10122019 | 3 | 4 | 0.51676182 | 0.30102999 |
| chr18 | 43687665 | 43724104 | 36440  | 2 | 1 | 4 | 0.02438896 | 0.18734596 | 3 | 4 | 0.51676182 | 0.18734596 |
| chr18 | 43724104 | 43764876 | 40773  | 2 | 1 | 4 | 0.02438896 | 0.11390336 | 3 | 5 | 0.51676182 | 0.30102999 |
| chr18 | 43764876 | 43813850 | 48975  | 1 | 1 | 3 | 0.02438896 | 0.05670724 | 3 | 5 | 0.51676182 | 0.45545077 |
| chr18 | 43813850 | 44000950 | 187101 | 6 | 1 | 3 | 0.02438896 | 0.03070643 | 3 | 6 | 0.51676182 | 0.63695542 |
| chr18 | 44000950 | 44175204 | 174255 | 4 | 1 | 3 | 0.02438896 | 0.05670724 | 3 | 5 | 0.51676182 | 0.45545077 |
| chr18 | 44175204 | 44291864 | 116661 | 3 | 1 | 3 | 0.10191641 | 0.05670724 | 4 | 5 | 0.76005302 | 0.45545077 |
| chr18 | 44291864 | 44306423 | 14560  | 2 | 2 | 3 | 0.0429175  | 0.05670724 | 4 | 5 | 0.47744371 | 0.45545077 |
| chr18 | 44306423 | 44396972 | 90550  | 1 | 1 | 3 | 0.02438896 | 0.05670724 | 3 | 5 | 0.51676182 | 0.45545077 |
| chr18 | 44396972 | 44540582 | 143611 | 3 | 1 | 3 | 0.02438896 | 0.10122019 | 3 | 4 | 0.51676182 | 0.30102999 |
| chr18 | 44540582 | 44560423 | 19842  | 2 | 1 | 3 | 0.10191641 | 0.10122019 | 4 | 4 | 0.76005302 | 0.30102999 |
| chr18 | 44560423 | 44649052 | 88630  | 2 | 1 | 3 | 0.02438896 | 0.10122019 | 3 | 4 | 0.51676182 | 0.30102999 |
| chr18 | 44649052 | 44649111 | 60     | 1 | 1 | 3 | 0.02438896 | 0.05670724 | 3 | 5 | 0.51676182 | 0.45545077 |
| chr18 | 44649111 | 44701591 | 52481  | 2 | 1 | 3 | 0.02438896 | 0.10122019 | 3 | 4 | 0.51676182 | 0.30102999 |
| chr18 | 44701591 | 44701650 | 60     | 1 | 1 | 3 | 0.02438896 | 0.05670724 | 3 | 5 | 0.51676182 | 0.45545077 |
| chr18 | 44701650 | 44938570 | 236921 | 3 | 1 | 2 | 0.02438896 | 0.02162467 | 3 | 5 | 0.51676182 | 0.68214471 |
| chr18 | 44938570 | 45035206 | 96637  | 1 | 1 | 2 | 0.02438896 | 0.0429175  | 3 | 4 | 0.51676182 | 0.47744371 |
| chr18 | 45035206 | 45132849 | 97644  | 1 | 1 | 2 | 0.05404976 | 0.0429175  | 2 | 4 | 0.30102999 | 0.47744371 |
| chr18 | 45132849 | 45132908 | 60     | 1 | 1 | 3 | 0.05404976 | 0.03070643 | 2 | 6 | 0.30102999 | 0.63695542 |
| chr18 | 45132908 | 45182273 | 49366  | 1 | 1 | 3 | 0.05404976 | 0.05670724 | 2 | 6 | 0.30102999 | 0.45545077 |
| chr18 | 45182273 | 45283832 | 101560 | 2 | 1 | 3 | 0.02438896 | 0.05670724 | 3 | 5 | 0.51676182 | 0.45545077 |
| chr18 | 45283832 | 45402156 | 118325 | 2 | 1 | 2 | 0.02438896 | 0.0429175  | 3 | 4 | 0.51676182 | 0.47744371 |
| chr18 | 45402156 | 45402215 | 60     | 1 | 1 | 3 | 0.02438896 | 0.05670724 | 3 | 5 | 0.51676182 | 0.45545077 |
| chr18 | 45402215 | 45460650 | 58436  | 2 | 1 | 3 | 0.02438896 | 0.17593012 | 3 | 3 | 0.51676182 | 0.17593012 |
| chr18 | 45460650 | 45460709 | 60     | 1 | 1 | 3 | 0.02438896 | 0.05670724 | 3 | 5 | 0.51676182 | 0.45545077 |
| chr18 | 45460709 | 45639299 | 178591 | 2 | 0 | 1 | 0          | 0.05404976 | 1 | 2 | 0.30102999 | 0.30102999 |
| chr18 | 45639299 | 45685853 | 46555  | 2 | 0 | 2 | 0.1575501  | 0          | 2 | 2 | 0.30102999 | 0.1575501  |
| chr18 | 45685853 | 45926429 | 240577 | 4 | 0 | 3 | 0          | 0.30102999 | 1 | 2 | 0.30102999 | 0.08289318 |
| chr18 | 45926429 | 45992988 | 66560  | 2 | 1 | 3 | 0.1218695  | 0.30102999 | 2 | 2 | 0.1218695  | 0.08289318 |
| chr18 | 45992988 | 46054292 | 61305  | 1 | 0 | 3 | 0          | 0.30102999 | 1 | 2 | 0.30102999 | 0.08289318 |
| chr18 | 46054292 | 46054351 | 60     | 1 | 0 | 3 | 0          | 0.17593012 | 2 | 3 | 0.61140001 | 0.17593012 |
| chr18 | 46054351 | 46117199 | 62849  | 1 | 0 | 3 | 0          | 0.30102999 | 2 | 2 | 0.61140001 | 0.08289318 |
| chr18 | 46117199 | 46117257 | 59     | 1 | 0 | 3 | 0          | 0.17593012 | 2 | 3 | 0.61140001 | 0.17593012 |
| chr18 | 46117257 | 46168465 | 51209  | 1 | 0 | 3 | 0          | 0.30102999 | 2 | 2 | 0.61140001 | 0.08289318 |
| chr18 | 46168465 | 46316215 | 147751 | 4 | 0 | 0 | 0          | 0.30102999 | 3 | 2 | 0.93173516 | 0.08289318 |
| chr18 | 46316215 | 46386594 | 70380  | 1 | 0 | 3 | 0          | 0.51676182 | 3 | 1 | 0.93173516 | 0.02438896 |
| chr18 | 46386594 | 46457918 | 71325  | 2 | 0 | 0 | 0          | 0.76005302 | 3 | 1 | 0.93173516 | 0.01091641 |
| chr18 | 46457918 | 46457977 | 60     | 1 | 0 | 4 | 0          | 0.47744371 | 3 | 2 | 0.93173516 | 0.0429175  |
| chr18 | 46457977 | 46570198 | 112222 | 2 | 0 | 0 | 0          | 0.30102999 | 2 | 2 | 0.93173516 | 0.08289318 |
| chr18 | 46570198 | 46570257 | 60     | 1 | 0 | 4 | 0          | 0.47744371 | 3 | 2 | 0.93173516 | 0.0429175  |
| chr18 | 46570257 | 46611500 | 41244  | 1 | 0 | 4 | 0          | 0.47744371 | 2 | 2 | 0.61140001 | 0.0429175  |
| chr18 | 46611500 | 46645129 | 33630  | 2 | 0 | 4 | 0          | 0.30102999 | 2 | 3 | 0.61140001 | 0.10122019 |
| chr18 | 46645129 | 46725840 | 80712  | 3 | 0 | 0 | 0          | 0.30102999 | 3 | 3 | 0.93173516 | 0.10122019 |
| chr18 | 46725840 | 46856943 | 131104 | 2 | 0 | 4 | 0          | 0.47744371 | 3 | 2 | 0.93173516 | 0.0429175  |
| chr18 | 46856943 | 46983891 | 126949 | 3 | 0 | 0 | 0          | 0.30102999 | 3 | 2 | 0.93173516 | 0.10122019 |
| chr18 | 46983891 | 47017646 | 33756  | 3 | 0 | 4 | 0          | 0.18734596 | 3 | 4 | 0.93173516 | 0.18734596 |
| chr18 | 47017646 | 47278386 | 260741 | 4 | 0 | 4 | 0          | 0.18734596 | 3 | 4 | 0.61140001 | 0.18734596 |
| chr18 | 47278386 | 47278445 | 60     | 1 | 0 | 4 | 0          | 0.18734596 | 3 | 4 | 0.93173516 | 0.18734596 |
| chr18 | 47278445 | 47323872 | 45428  | 2 | 0 | 4 | 0          | 0.30102999 | 2 | 3 | 0.61140001 | 0.10122019 |
| chr18 | 47323872 | 47368278 | 44407  | 1 | 0 | 3 | 0          | 0.17593012 | 2 | 3 | 0.61140001 | 0.17593012 |
| chr18 | 47368278 | 47368337 | 60     | 1 | 0 | 3 | 0          | 0.10122019 | 2 | 4 | 0.61140001 | 0.30102999 |
| chr18 | 47368337 | 47407706 | 39370  | 1 | 0 | 3 | 0          | 0.10122019 | 1 | 4 | 0.30102999 | 0.30102999 |
| chr18 | 47407706 | 47407765 | 60     | 1 | 0 | 4 | 0          | 0.18734596 | 1 | 4 | 0.30102999 | 0.18734596 |
| chr18 | 47407765 | 47452659 | 44895  | 1 | 0 | 3 | 0          | 0.10122019 | 1 | 4 | 0.30102999 | 0.30102999 |
| chr18 | 47452659 | 47452718 | 60     | 1 | 0 | 4 | 0          | 0.18734596 | 2 | 4 | 0.61140001 | 0.18734596 |
| chr18 | 47452718 | 47531483 | 78766  | 1 | 0 | 3 | 0          | 0.10122019 | 2 | 4 | 0.61140001 | 0.30102999 |
| chr18 | 47531483 | 47563288 | 31806  | 2 | 0 | 0 | 0          | 0.10122019 | 4 | 4 | 1.26272838 | 0.30102999 |
| chr18 | 47563288 | 47563347 | 60     | 1 | 0 | 4 | 0          | 0.18734596 | 4 | 4 | 1.26272838 | 0.18734596 |
| chr18 | 47563347 | 47610403 | 47057  | 1 | 0 | 3 | 0          | 0.10122019 | 2 | 4 | 0.61140001 | 0.30102999 |
| chr18 | 47610403 | 47610462 | 60     | 1 | 0 | 4 | 0          | 0.18734596 | 2 | 4 | 0.61140001 | 0.18734596 |
| chr18 | 47610462 | 47643651 | 33190  | 1 | 0 | 3 | 0          | 0.10122019 | 2 | 4 | 0.61140001 | 0.30102999 |
| chr18 | 47643651 | 47643710 | 60     | 1 | 0 | 3 | 0          | 0.10122019 | 3 | 4 | 0.93173516 | 0.30102999 |
| chr18 | 47643710 | 47702420 | 125711 | 2 | 0 | 3 | 0          | 0.10122019 | 2 | 4 | 0.61140001 | 0.30102999 |
| chr18 | 47702420 | 47802768 | 33349  | 3 | 0 | 4 | 0          | 0.18734596 | 3 | 3 | 0.18734596 | 0.18734596 |
| chr18 | 47802768 | 47911569 | 108802 | 3 | 0 | 3 | 0          | 0.10122019 | 3 | 4 | 0.93173516 | 0.30102999 |
| chr18 | 47911569 | 47917675 | 6107   | 2 | 0 | 4 | 0          | 0.18734596 | 3 | 4 | 0.93173516 | 0.18734596 |
| chr18 | 47917675 | 48036212 | 118538 | 1 | 0 | 1 | 0          | 0.18734596 | 1 | 2 | 0.61140001 | 0.18734596 |
| chr18 | 48036212 | 48226765 | 190554 | 6 | 0 | 5 | 0          | 0.30102999 | 2 | 4 | 0.61140001 | 0.11390336 |
| chr18 | 48226765 | 48351532 | 124768 | 2 | 0 | 3 | 0          | 0.10122019 | 0 | 4 | 0          | 0.30102999 |
| chr18 | 48351532 | 48351591 | 60     | 1 | 0 | 5 | 0          | 0.19510895 | 0 | 5 | 0          | 0.19510895 |
| chr18 | 48351591 | 48560414 | 208824 | 4 | 0 | 0 | 0          | 0.05670724 | 0 | 5 | 0          | 0.45545077 |
| chr18 | 48560414 | 48598971 | 38558  | 1 | 0 | 3 | 0          | 0.10122019 | 0 | 0 | 0.30102999 | 0.30102999 |
| chr18 | 48598971 | 48604914 | 5944   | 2 | 0 | 4 | 0          | 0.18734596 | 0 | 4 | 0          | 0.18734596 |
| chr18 | 48604914 | 48702126 | 97213  | 2 | 0 | 3 | 0          | 0.17593012 | 0 | 3 | 0          | 0.17593012 |
| chr18 | 48702126 | 48853707 | 151582 | 4 | 0 | 0 | 0          | 0.10122019 | 0 | 4 | 0          | 0.30102999 |
| chr18 | 48853707 | 48853766 | 60     | 1 | 0 | 4 | 0          | 0.18734596 | 0 | 4 | 0          | 0.18734596 |
| chr18 | 48853766 | 48981737 | 127972 | 2 | 0 | 0 | 0          | 0.47744371 | 0 | 2 | 0          | 0.0429175  |
| chr18 | 48981737 | 48981796 | 60     | 1 | 0 | 4 | 0          | 0.30102999 | 0 | 3 | 0          | 0.10122019 |
| chr18 | 48981796 | 49062358 | 80563  | 1 | 0 | 4 | 0          | 0.47744371 | 0 | 0 | 0          | 0.0429175  |
| chr18 | 49062358 | 49171603 | 109246 | 1 | 0 | 0 | 0          | 0.51676182 | 0 | 1 | 0          | 0.02438896 |
| chr18 | 49171603 | 49171662 | 60     | 1 | 0 | 3 | 0          | 0.30102999 | 1 | 2 | 0.30102999 | 0.08289318 |
| chr18 | 49171662 | 49335529 | 163868 | 1 | 0 | 2 | 0          | 0.1575501  | 2 | 2 | 0.30102999 | 0.1575501  |
| chr18 | 49335529 | 49454280 | 118752 | 2 | 0 | 0 | 0          | 0.30102999 | 1 | 2 | 0.30102999 | 0.08289318 |
| chr18 | 49454280 | 49454339 | 60     | 1 | 0 | 4 | 0          | 0.30102999 | 1 | 3 | 0.30102999 | 0.10122019 |
| chr18 | 49454339 | 49454872 | 91534  | 1 | 0 | 3 | 0          | 0.17593012 | 1 | 3 | 0.30102999 | 0.17593012 |
| chr18 | 49454872 | 49454931 | 60     | 1 | 0 | 4 | 0          | 0.18734596 | 1 | 4 | 0.30102999 | 0.18734596 |
| chr18 | 49454931 | 49644782 | 98852  | 1 | 0 | 4 | 0          | 0.18734596 | 0 | 4 | 0          | 0.18734596 |
| chr18 | 49644782 | 49769002 | 124221 | 2 | 0 | 4 | 0          | 0.11390336 | 0 | 5 | 0.30102999 | 0.30102999 |
| chr18 | 49769002 | 49966590 | 197589 | 4 | 0 | 0 | 0          | 0.07511598 | 1 | 7 | 0.30102999 | 0.43181735 |
| chr18 | 49966590 | 49966649 | 60     | 1 | 0 | 6 | 0          | 0.129913   | 1 | 7 | 0.30102999 | 0.30102999 |
| chr18 | 49966649 | 50033526 | 66878  | 2 | 0 | 5 | 0          | 0.07511598 | 1 | 7 | 0.30102999 | 0.43181735 |
| chr18 | 50033526 | 50169570 |        |   |   |   |            |            |   |   |            |            |

|       |          |          |        |   |   |   |            |            |   |   |            |            |
|-------|----------|----------|--------|---|---|---|------------|------------|---|---|------------|------------|
| chr18 | 52676620 | 52895125 | 218506 | 2 | 0 | 4 | 0          | 0.47744371 | 1 | 2 | 0.30102999 | 0.0429175  |
| chr18 | 52895125 | 52895184 | 60     | 1 | 0 | 4 | 0          | 0.30102999 | 1 | 3 | 0.30102999 | 0.1012019  |
| chr18 | 52895184 | 53007161 | 111978 | 3 | 0 | 4 | 0          | 0.47744371 | 0 | 2 | 0          | 0.0429175  |
| chr18 | 53007161 | 53115586 | 108426 | 3 | 0 | 5 | 0          | 0.45545077 | 0 | 0 | 0          | 0.05670724 |
| chr18 | 53115586 | 53254333 | 138748 | 4 | 0 | 0 | 0          | 0.63695542 | 1 | 3 | 0.30102999 | 0.03070643 |
| chr18 | 53254333 | 53254392 | 60     | 1 | 0 | 6 | 0          | 0.44141547 | 1 | 4 | 0.30102999 | 0.06713722 |
| chr18 | 53254392 | 53462230 | 207839 | 2 | 0 | 4 | 0          | 0.30102999 | 1 | 3 | 0.30102999 | 0.10122019 |
| chr18 | 53462230 | 53657471 | 195242 | 3 | 0 | 4 | 0          | 0.18734596 | 1 | 4 | 0.30102999 | 0.18734596 |
| chr18 | 53657471 | 53764280 | 106810 | 3 | 0 | 5 | 0          | 0.30102999 | 2 | 4 | 0.61140001 | 0.11390336 |
| chr18 | 53764280 | 53813460 | 49181  | 1 | 0 | 5 | 0          | 0.45545077 | 1 | 3 | 0.30102999 | 0.05670724 |
| chr18 | 53813460 | 53813519 | 60     | 1 | 0 | 6 | 0          | 0.63695542 | 1 | 3 | 0.30102999 | 0.03070643 |
| chr18 | 53813519 | 54037167 | 223649 | 2 | 0 | 4 | 0          | 0.30102999 | 1 | 3 | 0.30102999 | 0.10122019 |
| chr18 | 54037167 | 54113485 | 76319  | 2 | 0 | 4 | 0          | 0.45545077 | 2 | 3 | 0.61140001 | 0.05670724 |
| chr18 | 54113485 | 54296735 | 183251 | 2 | 0 | 4 | 0          | 0.47744371 | 1 | 2 | 0.30102999 | 0.0429175  |
| chr18 | 54296735 | 54361880 | 65146  | 2 | 0 | 0 | 0          | 0.68214471 | 2 | 2 | 0.61140001 | 0.02162467 |
| chr18 | 54361880 | 54361939 | 60     | 1 | 0 | 5 | 0          | 0.45545077 | 2 | 3 | 0.61140001 | 0.05670724 |
| chr18 | 54361939 | 54414845 | 52907  | 1 | 0 | 4 | 0          | 0.30102999 | 2 | 3 | 0.61140001 | 0.10122019 |
| chr18 | 54414845 | 54547147 | 132303 | 2 | 0 | 4 | 0          | 0.47744371 | 2 | 2 | 0.61140001 | 0.0429175  |
| chr18 | 54547147 | 54547206 | 60     | 1 | 0 | 4 | 0          | 0.30102999 | 2 | 3 | 0.61140001 | 0.10122019 |
| chr18 | 54547206 | 54622449 | 75244  | 2 | 0 | 4 | 0          | 0.47744371 | 2 | 2 | 0.61140001 | 0.0429175  |
| chr18 | 54622449 | 54622508 | 60     | 1 | 0 | 4 | 0          | 0.30102999 | 2 | 3 | 0.61140001 | 0.10122019 |
| chr18 | 54622508 | 54687950 | 65443  | 1 | 0 | 4 | 0          | 0.30102999 | 2 | 2 | 0.61140001 | 0.03289318 |
| chr18 | 54687950 | 54804650 | 116701 | 2 | 0 | 4 | 0          | 0.47744371 | 2 | 2 | 0.61140001 | 0.0429175  |
| chr18 | 54804650 | 54816643 | 11994  | 2 | 0 | 5 | 0          | 0.30102999 | 2 | 4 | 0.61140001 | 0.11390336 |
| chr18 | 54816643 | 55018538 | 201896 | 2 | 0 | 4 | 0          | 0.18734596 | 2 | 2 | 0.61140001 | 0.18734596 |
| chr18 | 55018538 | 55024323 | 5786   | 2 | 0 | 5 | 0          | 0.19510895 | 3 | 5 | 0.93173516 | 0.19510895 |
| chr18 | 55024323 | 55138961 | 114639 | 2 | 0 | 4 | 0          | 0.18734596 | 3 | 4 | 0.93173516 | 0.18734596 |
| chr18 | 55138961 | 55139020 | 60     | 1 | 0 | 5 | 0          | 0.19510895 | 3 | 5 | 0.93173516 | 0.19510895 |
| chr18 | 55139020 | 55250393 | 111374 | 2 | 0 | 5 | 0          | 0.30102999 | 3 | 4 | 0.93173516 | 0.11390336 |
| chr18 | 55250393 | 55376306 | 125914 | 4 | 0 | 5 | 0          | 0.19510895 | 3 | 4 | 0.93173516 | 0.19510895 |
| chr18 | 55376306 | 55405005 | 28700  | 2 | 0 | 5 | 0          | 0.07511598 | 3 | 7 | 0.93173516 | 0.43181735 |
| chr18 | 55405005 | 55620156 | 215152 | 2 | 0 | 4 | 0          | 0.06713722 | 3 | 6 | 0.93173516 | 0.44141547 |
| chr18 | 55620156 | 55620215 | 60     | 1 | 0 | 6 | 0          | 0.20064824 | 3 | 6 | 0.93173516 | 0.20064824 |
| chr18 | 55620215 | 55708888 | 88674  | 1 | 0 | 5 | 0          | 0.12309572 | 3 | 6 | 0.30102999 | 0.30102999 |
| chr18 | 55708888 | 55802582 | 93695  | 4 | 0 | 5 | 0          | 0.07511598 | 3 | 7 | 0.93173516 | 0.43181735 |
| chr18 | 55802582 | 55868739 | 66158  | 2 | 0 | 3 | 0          | 0.01598258 | 3 | 7 | 0.93173516 | 0.84395715 |
| chr18 | 55868739 | 55919290 | 50552  | 2 | 0 | 5 | 0          | 0.07511598 | 3 | 7 | 0.93173516 | 0.43181735 |
| chr18 | 55919290 | 55965118 | 45829  | 1 | 0 | 4 | 0          | 0.03812622 | 3 | 7 | 0.93173516 | 0.60763643 |
| chr18 | 55965118 | 56021527 | 56410  | 1 | 0 | 3 | 0          | 0.01598258 | 3 | 7 | 0.93173516 | 0.84395715 |
| chr18 | 56021527 | 56063722 | 42196  | 2 | 0 | 3 | 0          | 0.01598258 | 4 | 7 | 1.26272838 | 0.84395715 |
| chr18 | 56063722 | 56114405 | 50684  | 3 | 0 | 3 | 0          | 0.01598258 | 5 | 7 | 1.60515106 | 0.84395715 |
| chr18 | 56114405 | 56153213 | 38809  | 1 | 0 | 3 | 0          | 0.03070643 | 4 | 6 | 1.26272838 | 0.63695542 |
| chr18 | 56153213 | 56184029 | 30817  | 1 | 0 | 3 | 0          | 0.05670724 | 4 | 5 | 1.26272838 | 0.45545077 |
| chr18 | 56184029 | 56246521 | 62493  | 2 | 0 | 3 | 0          | 0.03070643 | 4 | 6 | 1.26272838 | 0.63695542 |
| chr18 | 56246521 | 56305873 | 59533  | 2 | 0 | 4 | 0          | 0.06713722 | 4 | 6 | 1.26272838 | 0.44141547 |
| chr18 | 56305873 | 56338084 | 32212  | 2 | 0 | 5 | 0          | 0.12309572 | 4 | 6 | 1.26272838 | 0.30102999 |
| chr18 | 56338084 | 56367729 | 29646  | 1 | 0 | 4 | 0          | 0.06713722 | 4 | 6 | 1.26272838 | 0.44141547 |
| chr18 | 56367729 | 56411663 | 43935  | 2 | 0 | 4 | 0          | 0.06713722 | 5 | 6 | 1.60515106 | 0.44141547 |
| chr18 | 56411663 | 56585530 | 173868 | 6 | 0 | 5 | 0          | 0.12309572 | 6 | 6 | 1.60515106 | 0.30102999 |
| chr18 | 56585530 | 56645426 | 59897  | 1 | 0 | 5 | 0          | 0.19510895 | 5 | 5 | 1.60515106 | 0.19510895 |
| chr18 | 56645426 | 56712055 | 66630  | 1 | 0 | 4 | 0          | 0.11390336 | 5 | 5 | 1.60515106 | 0.30102999 |
| chr18 | 56712055 | 56809345 | 97291  | 1 | 0 | 4 | 0          | 0.18734596 | 5 | 4 | 1.60515106 | 0.18734596 |
| chr18 | 56809345 | 56809404 | 60     | 1 | 1 | 5 | 0.00478973 | 0.30102999 | 5 | 4 | 1.02643191 | 0.11390336 |
| chr18 | 56809404 | 57022896 | 213493 | 6 | 1 | 4 | 0.00478973 | 0.18734596 | 5 | 4 | 1.02643191 | 0.18734596 |
| chr18 | 57022896 | 57155623 | 132728 | 2 | 1 | 4 | 0.01091641 | 0.18734596 | 4 | 4 | 0.76005302 | 0.18734596 |
| chr18 | 57155623 | 57155682 | 60     | 1 | 1 | 5 | 0.01091641 | 0.30102999 | 4 | 4 | 0.76005302 | 0.11390336 |
| chr18 | 57155682 | 57234972 | 79291  | 2 | 1 | 4 | 0.01091641 | 0.18734596 | 4 | 4 | 0.76005302 | 0.18734596 |
| chr18 | 57234972 | 57274793 | 39822  | 1 | 0 | 4 | 0          | 0.18734596 | 4 | 4 | 1.26272838 | 0.18734596 |
| chr18 | 57274793 | 57569648 | 294856 | 5 | 0 | 4 | 0          | 0.18734596 | 3 | 4 | 0.93173516 | 0.18734596 |
| chr18 | 57569648 | 57761111 | 206464 | 5 | 0 | 5 | 0          | 0.30102999 | 3 | 4 | 0.93173516 | 0.11390336 |
| chr18 | 57761111 | 57847119 | 71009  | 1 | 0 | 5 | 0          | 0.45545077 | 3 | 3 | 0.93173516 | 0.05670724 |
| chr18 | 57847119 | 57914543 | 67425  | 1 | 0 | 4 | 0          | 0.30102999 | 3 | 3 | 0.93173516 | 0.10122019 |
| chr18 | 57914543 | 58198905 | 284363 | 4 | 0 | 4 | 0          | 0.30102999 | 2 | 3 | 0.61140001 | 0.10122019 |
| chr18 | 58198905 | 58334261 | 135357 | 2 | 0 | 3 | 0          | 0.17593012 | 3 | 3 | 0.61140001 | 0.17593012 |
| chr18 | 58334261 | 58334320 | 60     | 1 | 0 | 3 | 0          | 0.30102999 | 3 | 3 | 0.93173516 | 0.17593012 |
| chr18 | 58334320 | 58517547 | 183228 | 2 | 0 | 3 | 0          | 0.30102999 | 2 | 2 | 0.61140001 | 0.08289318 |
| chr18 | 58517547 | 58582106 | 64560  | 1 | 0 | 3 | 0          | 0.10122019 | 2 | 2 | 0.61140001 | 0.30102999 |
| chr18 | 58582106 | 58582165 | 60     | 1 | 0 | 3 | 0          | 0.05670724 | 2 | 5 | 0.61140001 | 0.45545077 |
| chr18 | 58582165 | 58685167 | 103003 | 1 | 0 | 3 | 0          | 0.17593012 | 1 | 3 | 0.30102999 | 0.17593012 |
| chr18 | 58685167 | 58870623 | 185457 | 2 | 0 | 2 | 0          | 0.08289318 | 1 | 3 | 0.30102999 | 0.30102999 |
| chr18 | 58870623 | 59016390 | 145768 | 2 | 0 | 2 | 0          | 0.0429175  | 2 | 4 | 0.61140001 | 0.47744371 |
| chr18 | 59016390 | 59054986 | 38597  | 1 | 0 | 1 | 0          | 0.01091641 | 1 | 4 | 0.30102999 | 0.76005302 |
| chr18 | 59054986 | 59108394 | 53409  | 2 | 1 | 1 | 0.1218695  | 0.01091641 | 1 | 1 | 0.1218695  | 0.76005302 |
| chr18 | 59108394 | 59157813 | 49420  | 1 | 2 | 2 | 0.05404976 | 0.0429175  | 2 | 4 | 0.30102999 | 0.47744371 |
| chr18 | 59157813 | 59216675 | 58863  | 1 | 1 | 2 | 0.1218695  | 0.0429175  | 1 | 4 | 0.1218695  | 0.47744371 |
| chr18 | 59216675 | 59320991 | 104317 | 3 | 1 | 3 | 0.1218695  | 0.10122019 | 1 | 4 | 0.1218695  | 0.30102999 |
| chr18 | 59320991 | 59481918 | 160928 | 1 | 0 | 3 | 0          | 0.10122019 | 1 | 4 | 0.30102999 | 0.30102999 |
| chr18 | 59481918 | 59499931 | 18014  | 2 | 0 | 2 | 0          | 0.10122019 | 3 | 4 | 0.93173516 | 0.30102999 |
| chr18 | 59499931 | 59544482 | 44552  | 1 | 0 | 2 | 0          | 0.0429175  | 3 | 4 | 0.93173516 | 0.47744371 |
| chr18 | 59544482 | 59549639 | 5158   | 2 | 1 | 2 | 0.01091641 | 0.02162467 | 4 | 5 | 0.76005302 | 0.68214471 |
| chr18 | 59549639 | 59653070 | 103432 | 1 | 0 | 1 | 0          | 0.01091641 | 4 | 4 | 1.26272838 | 0.76005302 |
| chr18 | 59653070 | 59712412 | 59343  | 2 | 0 | 2 | 0          | 0.0429175  | 4 | 4 | 1.26272838 | 0.47744371 |
| chr18 | 59712412 | 59811336 | 98925  | 3 | 1 | 2 | 0.01091641 | 0.0429175  | 4 | 4 | 0.76005302 | 0.47744371 |
| chr18 | 59811336 | 59878466 | 67131  | 2 | 1 | 2 | 0.02438896 | 0.0429175  | 4 | 4 | 0.51676182 | 0.47744371 |
| chr18 | 59878466 | 59972668 | 94203  | 3 | 1 | 2 | 0.01091641 | 0.0429175  | 4 | 4 | 0.76005302 | 0.47744371 |
| chr18 | 59972668 | 60004574 | 31907  | 2 | 2 | 3 | 0.0429175  | 0.10122019 | 4 | 4 | 0.47744371 | 0.30102999 |
| chr18 | 60004574 | 60004633 | 60     | 1 | 2 | 3 | 0.02162467 | 0.10122019 | 5 | 4 | 0.68214471 | 0.30102999 |
| chr18 | 60004633 | 60173762 | 169130 | 3 | 2 | 3 | 0.0429175  | 0.10122019 | 4 | 4 | 0.47744371 | 0.30102999 |
| chr18 | 60173762 | 60215459 | 41698  | 2 | 2 | 3 | 0.01053319 | 0.10122019 | 6 | 4 | 0.91219088 | 0.30102999 |
| chr18 | 60215459 | 60245724 | 30266  | 1 | 2 | 3 | 0.02162467 | 0.10122019 | 5 | 4 | 0.68214471 | 0.30102999 |
| chr18 | 60245724 | 60380495 | 134772 | 4 | 2 | 4 | 0.02162467 | 0.18734596 | 5 | 4 | 0.68214471 | 0.18734596 |
| chr18 | 60380495 | 60380554 | 60     | 1 | 2 | 4 | 0.01053319 | 0.11390336 | 6 | 5 | 0.91219088 | 0.30102999 |
| chr18 | 60380554 | 60453234 | 72681  | 2 | 2 | 4 | 0.0429175  | 0.11390336 | 4 | 4 | 0.47744371 | 0.30102999 |
| chr18 | 60453234 | 60453293 | 60     | 1 | 2 | 4 | 0.02162467 | 0.11390336 | 5 | 5 | 0.68214471 | 0          |

|       |          |          |        |    |   |   |            |            |   |   |            |            |
|-------|----------|----------|--------|----|---|---|------------|------------|---|---|------------|------------|
| chr18 | 62505392 | 62618174 | 112783 | 1  | 1 | 5 | 0.30102999 | 0.45545077 | 0 | 3 | 0          | 0.05670724 |
| chr18 | 62618174 | 62618233 | 60     | 1  | 1 | 6 | 0.30102999 | 0.44141547 | 0 | 4 | 0          | 0.06713722 |
| chr18 | 62618233 | 62894117 | 275885 | 2  | 1 | 4 | 0.30102999 | 0.76005302 | 0 | 1 | 0          | 0.01091641 |
| chr18 | 62894117 | 62957094 | 62978  | 2  | 1 | 4 | 0.30102999 | 0.47744371 | 0 | 2 | 0          | 0.0429175  |
| chr18 | 62957094 | 62957153 | 60     | 1  | 1 | 4 | 0.30102999 | 0.11390336 | 0 | 5 | 0          | 0.30102999 |
| chr18 | 62957153 | 63038645 | 81493  | 2  | 1 | 4 | 0.30102999 | 0.30102999 | 0 | 3 | 0          | 0.10122019 |
| chr18 | 63038645 | 63279714 | 241070 | 1  | 0 | 3 | 0          | 0.51676182 | 0 | 1 | 0          | 0.02438896 |
| chr18 | 63279714 | 63279773 | 60     | 1  | 1 | 4 | 0.30102999 | 0.47744371 | 0 | 2 | 0          | 0.0429175  |
| chr18 | 63279773 | 63492421 | 212649 | 3  | 1 | 3 | 0.30102999 | 0.30102999 | 0 | 0 | 0          | 0.08289318 |
| chr18 | 63492421 | 63536154 | 43734  | 1  | 0 | 3 | 0          | 0.30102999 | 0 | 0 | 0          | 0.08289318 |
| chr18 | 63536154 | 63635348 | 99195  | 3  | 0 | 3 | 0          | 0.10122019 | 0 | 2 | 0          | 0.30102999 |
| chr18 | 63635348 | 63993067 | 357720 | 2  | 0 | 3 | 0          | 0.17593012 | 0 | 3 | 0          | 0.17593012 |
| chr18 | 63993067 | 64131605 | 138539 | 2  | 0 | 5 | 0          | 0.45545077 | 0 | 3 | 0          | 0.05670724 |
| chr18 | 64131605 | 64254055 | 122451 | 2  | 0 | 4 | 0          | 0.30102999 | 0 | 3 | 0          | 0.10122019 |
| chr18 | 64254055 | 64316333 | 62279  | 3  | 0 | 5 | 0          | 0.19510895 | 0 | 5 | 0          | 0.19510895 |
| chr18 | 64316333 | 64316392 | 60     | 1  | 0 | 7 | 0          | 0.43181735 | 0 | 3 | 0          | 0.07511598 |
| chr18 | 64316392 | 64494120 | 177729 | 1  | 0 | 5 | 0          | 0.45545077 | 0 | 3 | 0          | 0.05670724 |
| chr18 | 64494120 | 64635785 | 141666 | 2  | 0 | 4 | 0          | 0.47744371 | 0 | 2 | 0          | 0.0429175  |
| chr18 | 64635785 | 64635844 | 60     | 1  | 0 | 5 | 0          | 0.45545077 | 0 | 3 | 0          | 0.05670724 |
| chr18 | 64635844 | 64866339 | 230496 | 2  | 0 | 4 | 0          | 0.47744371 | 0 | 2 | 0          | 0.0429175  |
| chr18 | 64866339 | 65388686 | 532348 | 8  | 0 | 0 | 0          | 0.30102999 | 0 | 3 | 0          | 0.10122019 |
| chr18 | 65388686 | 65557293 | 158608 | 4  | 0 | 5 | 0          | 0.30102999 | 0 | 4 | 0          | 0.11390336 |
| chr18 | 65557293 | 65676232 | 118940 | 1  | 0 | 5 | 0          | 0.68214471 | 0 | 2 | 0          | 0.02162467 |
| chr18 | 65676232 | 65802005 | 125774 | 1  | 1 | 5 | 0.30102999 | 0.68214471 | 0 | 2 | 0          | 0.02162467 |
| chr18 | 65802005 | 65802064 | 60     | 1  | 1 | 5 | 0.30102999 | 0.45545077 | 0 | 3 | 0          | 0.05670724 |
| chr18 | 65802064 | 65866319 | 64256  | 1  | 0 | 5 | 0          | 0.45545077 | 0 | 3 | 0          | 0.05670724 |
| chr18 | 65866319 | 66086010 | 219692 | 2  | 0 | 4 | 0          | 0.30102999 | 0 | 3 | 0          | 0.10122019 |
| chr18 | 66086010 | 66190392 | 104383 | 1  | 0 | 3 | 0          | 0.30102999 | 0 | 2 | 0          | 0.08289318 |
| chr18 | 66190392 | 66190451 | 60     | 1  | 0 | 3 | 0          | 0.30102999 | 1 | 2 | 0.30102999 | 0.08289318 |
| chr18 | 66190451 | 66289865 | 99415  | 1  | 0 | 2 | 0          | 0.1575501  | 1 | 2 | 0.30102999 | 0.1575501  |
| chr18 | 66289865 | 66359504 | 69640  | 2  | 0 | 2 | 0          | 0.08289318 | 2 | 3 | 0.61140001 | 0.30102999 |
| chr18 | 66359504 | 66359563 | 60     | 1  | 0 | 3 | 0          | 0.17593012 | 2 | 3 | 0.61140001 | 0.17593012 |
| chr18 | 66359563 | 66381379 | 21817  | 1  | 0 | 3 | 0          | 0.17593012 | 1 | 3 | 0.30102999 | 0.17593012 |
| chr18 | 66381379 | 66506010 | 124632 | 3  | 1 | 4 | 0.1218695  | 0.30102999 | 3 | 1 | 0.1218695  | 0.10122019 |
| chr18 | 66506010 | 66598119 | 92110  | 2  | 1 | 3 | 0.1218695  | 0.30102999 | 1 | 2 | 0.1218695  | 0.08289318 |
| chr18 | 66598119 | 66598178 | 60     | 1  | 1 | 4 | 0.1218695  | 0.30102999 | 1 | 3 | 0.1218695  | 0.10122019 |
| chr18 | 66598178 | 66645840 | 47663  | 1  | 1 | 3 | 0.1218695  | 0.30102999 | 1 | 2 | 0.1218695  | 0.08289318 |
| chr18 | 66645840 | 66834041 | 188202 | 4  | 1 | 3 | 0.05404976 | 0.30102999 | 2 | 2 | 0.30102999 | 0.08289318 |
| chr18 | 66834041 | 66906349 | 72309  | 2  | 2 | 3 | 0.1575501  | 0.17593012 | 2 | 3 | 0.1575501  | 0.17593012 |
| chr18 | 66906349 | 66906408 | 60     | 1  | 2 | 4 | 0.08289318 | 0.30102999 | 3 | 3 | 0.30102999 | 0.10122019 |
| chr18 | 66906408 | 67088204 | 181797 | 2  | 2 | 3 | 0.1575501  | 0.17593012 | 2 | 3 | 0.1575501  | 0.17593012 |
| chr18 | 67088204 | 67088263 | 60     | 1  | 2 | 3 | 0.08289318 | 0.17593012 | 3 | 3 | 0.30102999 | 0.17593012 |
| chr18 | 67088263 | 67297512 | 209250 | 5  | 1 | 3 | 0.05404976 | 0.17593012 | 2 | 3 | 0.30102999 | 0.17593012 |
| chr18 | 67297512 | 67318038 | 20527  | 1  | 1 | 3 | 0.05404976 | 0.30102999 | 2 | 2 | 0.30102999 | 0.08289318 |
| chr18 | 67318038 | 67318097 | 60     | 1  | 1 | 4 | 0.05404976 | 0.47744371 | 2 | 2 | 0.30102999 | 0.0429175  |
| chr18 | 67318097 | 67365639 | 47543  | 1  | 1 | 3 | 0.05404976 | 0.30102999 | 2 | 2 | 0.30102999 | 0.08289318 |
| chr18 | 67365639 | 67365697 | 59     | 1  | 2 | 3 | 0.08289318 | 0.17593012 | 3 | 3 | 0.30102999 | 0.17593012 |
| chr18 | 67365697 | 67445448 | 79752  | 2  | 1 | 3 | 0.05404976 | 0.17593012 | 2 | 3 | 0.30102999 | 0.17593012 |
| chr18 | 67445448 | 67508863 | 63416  | 1  | 1 | 3 | 0.05404976 | 0.30102999 | 2 | 2 | 0.30102999 | 0.08289318 |
| chr18 | 67508863 | 67508922 | 60     | 1  | 2 | 4 | 0.1575501  | 0.47744371 | 2 | 2 | 0.1575501  | 0.0429175  |
| chr18 | 67508922 | 67589292 | 80371  | 1  | 2 | 3 | 0.1575501  | 0.30102999 | 2 | 2 | 0.1575501  | 0.08289318 |
| chr18 | 67589292 | 67685277 | 95986  | 3  | 1 | 3 | 0.05404976 | 0.30102999 | 2 | 2 | 0.30102999 | 0.08289318 |
| chr18 | 67685277 | 67804724 | 119448 | 3  | 2 | 3 | 0.1575501  | 0.30102999 | 2 | 2 | 0.1575501  | 0.08289318 |
| chr18 | 67804724 | 67957981 | 153258 | 4  | 2 | 3 | 0.30102999 | 0.30102999 | 1 | 2 | 0.05404976 | 0.08289318 |
| chr18 | 67957981 | 68023237 | 65257  | 3  | 2 | 3 | 0.1575501  | 0.30102999 | 2 | 2 | 0.1575501  | 0.08289318 |
| chr18 | 68023237 | 68023296 | 60     | 1  | 2 | 3 | 0.08289318 | 0.30102999 | 3 | 2 | 0.30102999 | 0.08289318 |
| chr18 | 68023296 | 68093778 | 70483  | 1  | 2 | 3 | 0.1575501  | 0.30102999 | 2 | 2 | 0.1575501  | 0.08289318 |
| chr18 | 68093778 | 68158803 | 65026  | 2  | 2 | 3 | 0.1575501  | 0.17593012 | 3 | 3 | 0.1575501  | 0.17593012 |
| chr18 | 68158803 | 68302106 | 143304 | 2  | 3 | 3 | 0.1575501  | 0.10122019 | 2 | 4 | 0.1575501  | 0.30102999 |
| chr18 | 68302106 | 68307963 | 5858   | 2  | 2 | 4 | 0.1575501  | 0.18734596 | 2 | 4 | 0.1575501  | 0.18734596 |
| chr18 | 68307963 | 68476892 | 168930 | 2  | 1 | 3 | 0.05404976 | 0.30102999 | 2 | 2 | 0.30102999 | 0.08289318 |
| chr18 | 68476892 | 68476951 | 60     | 1  | 1 | 3 | 0.02438896 | 0.30102999 | 3 | 2 | 0.51676182 | 0.08289318 |
| chr18 | 68476951 | 68632693 | 155743 | 1  | 1 | 3 | 0.05404976 | 0.30102999 | 2 | 2 | 0.30102999 | 0.08289318 |
| chr18 | 68632693 | 68632752 | 60     | 1  | 1 | 4 | 0.05404976 | 0.30102999 | 2 | 3 | 0.30102999 | 0.10122019 |
| chr18 | 68632752 | 68805374 | 172623 | 1  | 1 | 4 | 0.1218695  | 0.47744371 | 1 | 2 | 0.1218695  | 0.0429175  |
| chr18 | 68805374 | 68936426 | 131053 | 1  | 0 | 4 | 0.30102999 | 0.47744371 | 0 | 2 | 0          | 0.0429175  |
| chr18 | 68936426 | 69055254 | 118829 | 1  | 1 | 3 | 0.30102999 | 0.30102999 | 0 | 2 | 0          | 0.08289318 |
| chr18 | 69055254 | 69280883 | 225630 | 1  | 0 | 2 | 0          | 0.1575501  | 0 | 0 | 0          | 0.1575501  |
| chr18 | 69280883 | 69280942 | 60     | 1  | 2 | 2 | 0.61140001 | 0.1575501  | 0 | 2 | 0          | 0.1575501  |
| chr18 | 69280942 | 69476301 | 195360 | 2  | 1 | 1 | 0.30102999 | 0.05404976 | 0 | 2 | 0          | 0.30102999 |
| chr18 | 69476301 | 69476360 | 60     | 1  | 2 | 2 | 0.61140001 | 0.1575501  | 0 | 2 | 0          | 0.1575501  |
| chr18 | 69476360 | 69610835 | 134476 | 2  | 1 | 0 | 0.30102999 | 0          | 0 | 0 | 0          | 0          |
| chr18 | 69610835 | 70160991 | 550157 | 4  | 2 | 1 | 0.61140001 | 0.1218695  | 0 | 1 | 0          | 0.1218695  |
| chr18 | 70160991 | 70208885 | 47895  | 2  | 2 | 2 | 0.61140001 | 0.30102999 | 0 | 1 | 0          | 0.05404976 |
| chr18 | 70208885 | 70382640 | 173756 | 2  | 2 | 1 | 0.61140001 | 0.1218695  | 0 | 1 | 0          | 0.1218695  |
| chr18 | 70382640 | 70453012 | 70733  | 3  | 2 | 2 | 0.61140001 | 0.30102999 | 0 | 1 | 0          | 0.05404976 |
| chr18 | 70453012 | 70904250 | 451239 | 6  | 2 | 2 | 0.61140001 | 0.61140001 | 0 | 0 | 0          | 0          |
| chr18 | 70904250 | 71091915 | 187666 | 3  | 2 | 3 | 0.61140001 | 0.51676182 | 0 | 1 | 0          | 0.02438896 |
| chr18 | 71091915 | 71218776 | 126862 | 2  | 3 | 4 | 0.61140001 | 0.30102999 | 0 | 3 | 0          | 0.10122019 |
| chr18 | 71218776 | 71343626 | 124851 | 2  | 2 | 4 | 0.30102999 | 0.30102999 | 3 | 3 | 0.05404976 | 0.10122019 |
| chr18 | 71343626 | 71343685 | 60     | 1  | 2 | 5 | 0.1575501  | 0.45545077 | 2 | 3 | 0.1575501  | 0.05670724 |
| chr18 | 71343685 | 71409702 | 66018  | 1  | 2 | 5 | 0.30102999 | 0.45545077 | 1 | 3 | 0.05404976 | 0.05670724 |
| chr18 | 71409702 | 71643810 | 234109 | 2  | 2 | 4 | 0.30102999 | 0.30102999 | 1 | 3 | 0.05404976 | 0.10122019 |
| chr18 | 71643810 | 72110906 | 467097 | 12 | 2 | 6 | 0.1575501  | 0.44141547 | 2 | 4 | 0.1575501  | 0.06713722 |
| chr18 | 72110906 | 72185610 | 74705  | 5  | 2 | 6 | 0.1575501  | 0.30102999 | 2 | 5 | 0.1575501  | 0.12309572 |
| chr18 | 72185610 | 72280538 | 94929  | 2  | 2 | 6 | 0.30102999 | 0.30102999 | 1 | 5 | 0.05404976 | 0.12309572 |
| chr18 | 72280538 | 72280597 | 60     | 1  | 2 | 6 | 0.1575501  | 0.30102999 | 2 | 5 | 0.1575501  | 0.12309572 |
| chr18 | 72280597 | 72436928 | 156332 | 3  | 2 | 6 | 0.30102999 | 0.30102999 | 1 | 5 | 0.05404976 | 0.12309572 |
| chr18 | 72436928 | 72436987 | 60     | 1  | 4 | 6 | 0.47744371 | 0.30102999 | 2 | 5 | 0.0429175  | 0.12309572 |
| chr18 | 72436987 | 72516502 | 79516  | 2  | 4 | 5 | 0.47744371 | 0.19510895 | 2 | 5 | 0.0429175  | 0.19510895 |
| chr18 | 72516502 | 72632443 | 115942 | 3  | 4 | 5 | 0.76005302 | 0.30102999 | 1 | 4 | 0.01091641 | 0.11390336 |
| chr18 | 72632443 | 72632502 | 60     | 1  | 5 | 6 | 0.68214471 | 0.30102999 | 2 | 5 | 0.02162467 | 0.12309572 |
| chr18 | 72632502 | 72668025 | 35524  | 1  | 3 | 5 | 0.51676182 | 0.30102999 | 1 | 4 | 0.02438896 | 0.11390336 |
| chr18 | 72668025 | 72668084 | 60     | 1  | 3 | 5 | 0.51676182 | 0.19510895 | 0 | 5 | 0.02438896 | 0.195108   |

|       |          |          |        |   |   |   |            |            |   |    |            |            |
|-------|----------|----------|--------|---|---|---|------------|------------|---|----|------------|------------|
| chr18 | 74872811 | 74940661 | 67851  | 1 | 1 | 5 | 0.30102999 | 0.30102999 | 0 | 4  | 0          | 0.11390336 |
| chr18 | 74940661 | 75077574 | 136914 | 3 | 1 | 6 | 0.30102999 | 0.44141547 | 0 | 4  | 0          | 0.06713722 |
| chr18 | 75077574 | 75232370 | 154797 | 3 | 1 | 6 | 0.30102999 | 0.20064824 | 0 | 6  | 0          | 0.20064824 |
| chr18 | 75232370 | 75335200 | 102831 | 1 | 1 | 6 | 0.30102999 | 0.30102999 | 0 | 5  | 0          | 0.12309572 |
| chr18 | 75335200 | 75550939 | 215740 | 3 | 1 | 6 | 0.30102999 | 0.44141547 | 0 | 4  | 0          | 0.06713722 |
| chr18 | 75550939 | 75837550 | 286612 | 4 | 1 | 6 | 0.30102999 | 0.20064824 | 0 | 6  | 0          | 0.20064824 |
| chr18 | 75837550 | 75902706 | 65157  | 2 | 1 | 6 | 0.1218695  | 0.20064824 | 1 | 6  | 0.1218695  | 0.20064824 |
| chr18 | 75902706 | 75902765 | 60     | 1 | 1 | 6 | 0.1218695  | 0.129913   | 1 | 7  | 0.1218695  | 0.30102999 |
| chr18 | 75902765 | 76027350 | 124586 | 2 | 1 | 5 | 0.1218695  | 0.12309572 | 1 | 6  | 0.1218695  | 0.30102999 |
| chr18 | 76027350 | 76027409 | 60     | 1 | 1 | 6 | 0.1218695  | 0.20064824 | 1 | 6  | 0.1218695  | 0.20064824 |
| chr18 | 76027409 | 76194150 | 166742 | 2 | 1 | 5 | 0.1218695  | 0.19510895 | 1 | 5  | 0.1218695  | 0.19510895 |
| chr18 | 76194150 | 76194209 | 60     | 1 | 1 | 5 | 0.05404976 | 0.12309572 | 2 | 6  | 0.30102999 | 0.30102999 |
| chr18 | 76194209 | 76304557 | 110349 | 2 | 1 | 5 | 0.05404976 | 0.19510895 | 2 | 5  | 0.30102999 | 0.19510895 |
| chr18 | 76304557 | 76304616 | 60     | 1 | 2 | 6 | 0.1575501  | 0.30102999 | 2 | 5  | 0.1575501  | 0.12309572 |
| chr18 | 76304616 | 76462055 | 157440 | 2 | 2 | 5 | 0.1575501  | 0.19510895 | 2 | 5  | 0.1575501  | 0.19510895 |
| chr18 | 76462055 | 76462114 | 60     | 1 | 2 | 5 | 0.0828918  | 0.19510895 | 3 | 5  | 0.30102999 | 0.19510895 |
| chr18 | 76462114 | 76618387 | 156274 | 2 | 2 | 4 | 0.1575501  | 0.11390336 | 2 | 5  | 0.1575501  | 0.30102999 |
| chr18 | 76618387 | 76618446 | 60     | 1 | 2 | 4 | 0.0429175  | 0.12309572 | 4 | 6  | 0.47744371 | 0.30102999 |
| chr18 | 76618446 | 76712045 | 93600  | 1 | 2 | 5 | 0.0429175  | 0.06713722 | 4 | 6  | 0.47744371 | 0.44141547 |
| chr18 | 76712045 | 76744252 | 32208  | 2 | 3 | 4 | 0.10122019 | 0.06713722 | 4 | 6  | 0.30102999 | 0.44141547 |
| chr18 | 76744252 | 76855572 | 112321 | 3 | 3 | 5 | 0.10122019 | 0.12309572 | 4 | 6  | 0.30102999 | 0.30102999 |
| chr18 | 76855572 | 76903814 | 47243  | 1 | 3 | 5 | 0.17593012 | 0.12309572 | 3 | 6  | 0.17593012 | 0.30102999 |
| chr18 | 76903814 | 76903873 | 60     | 1 | 4 | 5 | 0.30102999 | 0.12309572 | 3 | 6  | 0.10122019 | 0.30102999 |
| chr18 | 76903873 | 77036101 | 132229 | 2 | 4 | 5 | 0.30102999 | 0.19510895 | 3 | 5  | 0.10122019 | 0.19510895 |
| chr18 | 77036101 | 77134694 | 98594  | 3 | 4 | 5 | 0.30102999 | 0.12309572 | 3 | 6  | 0.10122019 | 0.30102999 |
| chr18 | 77134694 | 77185928 | 51235  | 2 | 4 | 5 | 0.11390336 | 0.12309572 | 5 | 6  | 0.30102999 | 0.30102999 |
| chr18 | 77185928 | 77275831 | 89904  | 2 | 4 | 5 | 0.30102999 | 0.12309572 | 3 | 6  | 0.10122019 | 0.30102999 |
| chr18 | 77275831 | 77288002 | 12172  | 2 | 4 | 5 | 0.18734596 | 0.12309572 | 4 | 6  | 0.18734596 | 0.30102999 |
| chr18 | 77288002 | 77476102 | 188101 | 5 | 4 | 5 | 0.30102999 | 0.12309572 | 3 | 6  | 0.10122019 | 0.30102999 |
| chr18 | 77476102 | 77476161 | 60     | 1 | 5 | 5 | 0.45545077 | 0.12309572 | 3 | 6  | 0.05670724 | 0.30102999 |
| chr18 | 77476161 | 77702630 | 226470 | 5 | 3 | 4 | 0.17593012 | 0.06713722 | 3 | 6  | 0.17593012 | 0.44141547 |
| chr18 | 77702630 | 77762403 | 59774  | 2 | 4 | 4 | 0.0828918  | 0.06713722 | 3 | 6  | 0.30102999 | 0.44141547 |
| chr18 | 77762403 | 77893886 | 131484 | 3 | 4 | 4 | 0.17593012 | 0.06713722 | 3 | 6  | 0.17593012 | 0.44141547 |
| chr18 | 77893886 | 77917359 | 23474  | 2 | 4 | 4 | 0.30102999 | 0.06713722 | 3 | 6  | 0.10122019 | 0.44141547 |
| chr18 | 77917359 | 77917418 | 60     | 1 | 5 | 4 | 0.45545077 | 0.06713722 | 3 | 6  | 0.05670724 | 0.44141547 |
| chr18 | 77917418 | 77982126 | 64709  | 1 | 3 | 4 | 0.17593012 | 0.18734596 | 3 | 4  | 0.18734596 | 0.18734596 |
| chr19 | 327273   | 327332   | 60     | 1 | 2 | 2 | 0.61140001 | 0.00221948 | 0 | 8  | 0          | 1.44210395 |
| chr19 | 327332   | 421596   | 94265  | 2 | 1 | 2 | 0.30102999 | 0.00221948 | 0 | 8  | 0          | 1.44210395 |
| chr19 | 421596   | 463368   | 41773  | 1 | 0 | 2 | 0          | 0.00221948 | 0 | 8  | 0          | 1.44210395 |
| chr19 | 463368   | 537965   | 74598  | 2 | 0 | 3 | 0          | 0.00378107 | 0 | 9  | 0          | 1.3311237  |
| chr19 | 537965   | 606030   | 68066  | 2 | 1 | 4 | 0.30102999 | 0.01077081 | 0 | 9  | 0          | 1.01542894 |
| chr19 | 606030   | 786609   | 180580 | 5 | 1 | 4 | 0.30102999 | 0.00247414 | 0 | 11 | 0          | 1.52371709 |
| chr19 | 786609   | 823554   | 36946  | 1 | 1 | 4 | 0.30102999 | 0.00530919 | 0 | 10 | 0          | 1.2568129  |
| chr19 | 823554   | 830639   | 7086   | 2 | 1 | 4 | 0.30102999 | 0.00247414 | 0 | 11 | 0          | 1.52371709 |
| chr19 | 830639   | 863268   | 32630  | 1 | 1 | 4 | 0.30102999 | 0.00530919 | 0 | 10 | 0          | 1.2568129  |
| chr19 | 863268   | 972343   | 109076 | 3 | 2 | 4 | 0.61140001 | 0.00108487 | 0 | 12 | 0          | 1.81706455 |
| chr19 | 972343   | 1060075  | 87733  | 2 | 2 | 4 | 0.61140001 | 0.00530919 | 0 | 10 | 0          | 1.2568129  |
| chr19 | 1060075  | 1060134  | 60     | 1 | 2 | 4 | 0.61140001 | 4.45E-04   | 0 | 13 | 0          | 2.13824703 |
| chr19 | 1060134  | 1094565  | 34432  | 2 | 2 | 4 | 0.61140001 | 0.00247414 | 0 | 11 | 0          | 1.52371709 |
| chr19 | 1094565  | 1094614  | 50     | 1 | 2 | 4 | 0.61140001 | 4.45E-04   | 0 | 13 | 0          | 2.13824703 |
| chr19 | 1094614  | 1232412  | 137799 | 7 | 2 | 4 | 0.61140001 | 0.00108487 | 0 | 12 | 0          | 1.81706455 |
| chr19 | 1232412  | 1297440  | 65029  | 5 | 2 | 4 | 0.61140001 | 0.00247414 | 0 | 11 | 0          | 1.52371709 |
| chr19 | 1297440  | 1358258  | 60819  | 2 | 3 | 4 | 0.93173516 | 4.45E-04   | 0 | 13 | 0          | 2.13824703 |
| chr19 | 1358258  | 1364556  | 6299   | 2 | 3 | 4 | 0.93173516 | 1.70E-04   | 0 | 14 | 0          | 2.48919369 |
| chr19 | 1364556  | 1425923  | 61368  | 3 | 1 | 4 | 0.30102999 | 0.00108487 | 0 | 12 | 0          | 1.81706455 |
| chr19 | 1425923  | 1439151  | 13229  | 2 | 1 | 5 | 0.30102999 | 0.00141024 | 0 | 13 | 0          | 1.7506523  |
| chr19 | 1439151  | 1439200  | 50     | 1 | 1 | 5 | 0.30102999 | 5.83E-04   | 0 | 14 | 0          | 2.06733314 |
| chr19 | 1439200  | 1473121  | 33922  | 1 | 1 | 4 | 0.30102999 | 4.45E-04   | 0 | 13 | 0          | 2.13824703 |
| chr19 | 1473121  | 1477508  | 4388   | 2 | 2 | 4 | 0.61140001 | 4.45E-04   | 0 | 13 | 0          | 2.13824703 |
| chr19 | 1477508  | 1492108  | 14601  | 1 | 4 | 4 | 0.30102999 | 4.45E-04   | 0 | 13 | 0          | 2.13824703 |
| chr19 | 1492108  | 1549132  | 57025  | 1 | 1 | 4 | 0.30102999 | 0.00108487 | 0 | 12 | 0          | 1.81706455 |
| chr19 | 1549132  | 1597928  | 48797  | 3 | 1 | 4 | 0.30102999 | 4.45E-04   | 0 | 13 | 0          | 2.13824703 |
| chr19 | 1597928  | 1758857  | 160930 | 3 | 1 | 4 | 0.30102999 | 0.00108487 | 0 | 12 | 0          | 1.81706455 |
| chr19 | 1758857  | 1758916  | 60     | 1 | 2 | 4 | 0.61140001 | 4.45E-04   | 0 | 13 | 0          | 2.13824703 |
| chr19 | 1758916  | 1787473  | 28522  | 1 | 2 | 4 | 0.61140001 | 4.45E-04   | 0 | 12 | 0          | 1.81706455 |
| chr19 | 1787473  | 1815230  | 27794  | 1 | 2 | 4 | 0.61140001 | 0.00247414 | 0 | 11 | 0          | 1.52371709 |
| chr19 | 1815230  | 1852438  | 37409  | 3 | 2 | 5 | 0.61140001 | 0.00141024 | 0 | 13 | 0          | 1.7506523  |
| chr19 | 1852438  | 1882336  | 29899  | 2 | 2 | 5 | 0.61140001 | 0.00317045 | 0 | 12 | 0          | 1.46403142 |
| chr19 | 1882336  | 1952649  | 70114  | 4 | 2 | 5 | 0.61140001 | 0.00141024 | 0 | 13 | 0          | 1.7506523  |
| chr19 | 1952649  | 2102242  | 149594 | 5 | 2 | 5 | 0.61140001 | 0.00317045 | 0 | 12 | 0          | 1.46403142 |
| chr19 | 2102242  | 2138731  | 36490  | 3 | 2 | 6 | 0.61140001 | 0.00778066 | 0 | 12 | 0          | 1.17038931 |
| chr19 | 2138731  | 2183924  | 45194  | 1 | 2 | 6 | 0.61140001 | 0.01518174 | 0 | 11 | 0          | 0.9449689  |
| chr19 | 2183924  | 2215856  | 3193   | 2 | 7 | 6 | 0.61140001 | 0.03037338 | 0 | 11 | 0          | 0.73110763 |
| chr19 | 2215856  | 2240817  | 24962  | 2 | 7 | 6 | 0.61140001 | 0.01667721 | 0 | 12 | 0          | 0.92532268 |
| chr19 | 2240817  | 2372672  | 131856 | 6 | 2 | 6 | 0.61140001 | 0.00778066 | 0 | 12 | 0          | 1.17038931 |
| chr19 | 2372672  | 2428784  | 56113  | 4 | 2 | 6 | 0.61140001 | 0.00373523 | 0 | 13 | 0          | 1.42397267 |
| chr19 | 2428784  | 2511369  | 82586  | 2 | 2 | 6 | 0.61140001 | 0.00778066 | 0 | 12 | 0          | 1.17038931 |
| chr19 | 2511369  | 2613290  | 101922 | 3 | 2 | 6 | 0.61140001 | 0.01518174 | 0 | 11 | 0          | 0.9449689  |
| chr19 | 2613290  | 2716703  | 103414 | 3 | 5 | 6 | 0.61140001 | 0.00666883 | 0 | 11 | 0          | 1.20557689 |
| chr19 | 2716703  | 2800481  | 83779  | 6 | 2 | 6 | 0.30102999 | 0.00317045 | 1 | 12 | 0.05404976 | 1.46403142 |
| chr19 | 2800481  | 2853969  | 53489  | 6 | 6 | 6 | 0.30102999 | 0.00778066 | 1 | 12 | 0.05404976 | 1.17038931 |
| chr19 | 2853969  | 2890901  | 36933  | 2 | 2 | 6 | 0.30102999 | 0.01518174 | 1 | 11 | 0.05404976 | 0.9449689  |
| chr19 | 2890901  | 2905931  | 15031  | 2 | 2 | 6 | 0.30102999 | 0.00778066 | 1 | 12 | 0.05404976 | 1.17038931 |
| chr19 | 2905931  | 2936626  | 30696  | 2 | 2 | 6 | 0.30102999 | 0.01518174 | 1 | 11 | 0.05404976 | 0.9449689  |
| chr19 | 2936626  | 2991448  | 54823  | 2 | 6 | 6 | 0.30102999 | 0.02793176 | 1 | 10 | 0.05404976 | 0.74627054 |
| chr19 | 2991448  | 3027858  | 36411  | 2 | 2 | 6 | 0.30102999 | 0.01518174 | 1 | 11 | 0.05404976 | 0.9449689  |
| chr19 | 3027858  | 3027913  | 56     | 1 | 2 | 7 | 0.30102999 | 0.01667721 | 1 | 12 | 0.05404976 | 0.92532268 |
| chr19 | 3027913  | 3059192  | 31280  | 2 | 2 | 6 | 0.30102999 | 0.00778066 | 1 | 12 | 0.05404976 | 1.17038931 |
| chr19 | 3059192  | 3117122  | 57931  | 2 | 2 | 5 | 0.30102999 | 0.00666883 | 1 | 11 | 0.05404976 | 1.20557689 |
| chr19 | 3117122  | 3117181  | 60     | 1 | 2 | 7 | 0.30102999 | 0.03037338 | 1 | 11 | 0.05404976 | 0.73110763 |
| chr19 | 3117181  | 3236448  | 119268 | 4 | 2 | 5 | 0.30102999 | 0.00666883 | 1 | 11 | 0.05404976 | 1.20557689 |
| chr19 | 3236448  | 3236506  | 59     | 1 | 2 | 6 | 0.30102999 | 0.01518174 | 1 | 11 | 0.05404976 | 0.9449689  |
| chr19 | 3236506  | 3296069  | 59564  | 1 | 2 | 5 | 0.30102999 | 0.00666883 | 1 | 11 | 0.05404976 | 1.20557689 |
| chr19 | 3296069  | 3351581  | 55513  | 1 |   |   |            |            |   |    |            |            |

|       |         |         |        |   |   |     |            |            |   |    |            |            |
|-------|---------|---------|--------|---|---|-----|------------|------------|---|----|------------|------------|
| chr19 | 4205366 | 4205425 | 60     | 1 | 4 | 4   | 0.18734596 | 0.00530919 | 4 | 10 | 0.18734596 | 1.2568129  |
| chr19 | 4205425 | 4268242 | 62818  | 2 | 3 | 4   | 0.17593012 | 0.00530919 | 3 | 10 | 0.17593012 | 1.2568129  |
| chr19 | 4268242 | 4268301 | 60     | 1 | 3 | 5   | 0.17593012 | 0.00666883 | 3 | 11 | 0.17593012 | 1.20557689 |
| chr19 | 4268301 | 4365165 | 96865  | 5 | 2 | 5   | 0.08289318 | 0.01320236 | 3 | 10 | 0.30102999 | 0.97390707 |
| chr19 | 4365165 | 4378112 | 12948  | 1 | 2 | 5   | 0.08289318 | 0.02473314 | 3 | 9  | 0.30102999 | 0.76806864 |
| chr19 | 4378112 | 4392191 | 14080  | 2 | 3 | 5   | 0.17593012 | 0.02473314 | 3 | 9  | 0.17593012 | 0.76806864 |
| chr19 | 4392191 | 4392250 | 60     | 1 | 3 | 5   | 0.17593012 | 0.01320236 | 3 | 10 | 0.17593012 | 0.97390707 |
| chr19 | 4392250 | 4403030 | 10781  | 2 | 3 | 4   | 0.17593012 | 0.00530919 | 3 | 10 | 0.17593012 | 1.2568129  |
| chr19 | 4403030 | 4450298 | 47269  | 1 | 2 | 4   | 0.08289318 | 0.01077081 | 3 | 9  | 0.30102999 | 1.01542894 |
| chr19 | 4450298 | 4478976 | 28679  | 2 | 3 | 5   | 0.08289318 | 0.02473314 | 3 | 9  | 0.30102999 | 0.76806864 |
| chr19 | 4478976 | 4539275 | 60300  | 3 | 3 | 5   | 0.17593012 | 0.01320236 | 3 | 10 | 0.17593012 | 0.97390707 |
| chr19 | 4539275 | 4553191 | 13917  | 2 | 3 | 5   | 0.17593012 | 0.00666883 | 3 | 11 | 0.17593012 | 1.20557689 |
| chr19 | 4553191 | 4627166 | 73976  | 1 | 2 | 5   | 0.1575501  | 0.01320236 | 2 | 10 | 0.1575501  | 0.97390707 |
| chr19 | 4627166 | 4627225 | 60     | 1 | 2 | 5   | 0.1575501  | 0.00666883 | 2 | 11 | 0.1575501  | 1.20557689 |
| chr19 | 4627225 | 4675272 | 48048  | 3 | 1 | 5   | 0.05404976 | 0.00666883 | 2 | 11 | 0.30102999 | 1.20557689 |
| chr19 | 4675272 | 4675331 | 60     | 1 | 2 | 5   | 0.08289318 | 0.00666883 | 3 | 11 | 0.30102999 | 1.20557689 |
| chr19 | 4675331 | 4690926 | 15596  | 1 | 2 | 4   | 0.08289318 | 0.00530919 | 3 | 10 | 0.30102999 | 1.2568129  |
| chr19 | 4690926 | 4709381 | 18456  | 2 | 2 | 4   | 0.08289318 | 0.00247414 | 3 | 11 | 0.30102999 | 1.52371709 |
| chr19 | 4709381 | 4709440 | 60     | 1 | 2 | 4   | 0.08289318 | 0.00317045 | 3 | 12 | 0.30102999 | 1.46403142 |
| chr19 | 4709440 | 4817349 | 107910 | 3 | 1 | 4   | 0.05404976 | 0.00530919 | 2 | 10 | 0.30102999 | 1.2568129  |
| chr19 | 4817349 | 4879823 | 62475  | 5 | 1 | 4   | 0.05404976 | 0.00247414 | 2 | 11 | 0.30102999 | 1.52371709 |
| chr19 | 4879823 | 4879882 | 60     | 1 | 3 | 4   | 0.17593012 | 0.00247414 | 3 | 11 | 0.17593012 | 1.52371709 |
| chr19 | 4879882 | 4934897 | 55016  | 2 | 2 | 3   | 0.08289318 | 7.28E-04   | 3 | 11 | 0.30102999 | 1.91540774 |
| chr19 | 4934897 | 4934956 | 60     | 1 | 3 | 3   | 0.10122019 | 7.28E-04   | 4 | 11 | 0.30102999 | 1.91540774 |
| chr19 | 4934956 | 4963759 | 28804  | 2 | 2 | 3   | 0.08289318 | 7.28E-04   | 3 | 11 | 0.30102999 | 1.91540774 |
| chr19 | 4963759 | 5057513 | 93755  | 2 | 1 | 3   | 0.05404976 | 7.28E-04   | 2 | 11 | 0.30102999 | 1.91540774 |
| chr19 | 5057513 | 5057572 | 60     | 1 | 1 | 3   | 0.02438896 | 7.28E-04   | 3 | 11 | 0.51676182 | 1.91540774 |
| chr19 | 5057572 | 5298192 | 240621 | 6 | 1 | 3   | 0.05404976 | 7.28E-04   | 2 | 11 | 0.30102999 | 1.91540774 |
| chr19 | 5298192 | 5298251 | 60     | 1 | 1 | 4   | 0.05404976 | 0.00247414 | 2 | 11 | 0.30102999 | 1.52371709 |
| chr19 | 5298251 | 5398464 | 100214 | 1 | 1 | 4   | 0.05404976 | 0.00530919 | 2 | 10 | 0.30102999 | 1.2568129  |
| chr19 | 5398464 | 5456816 | 58533  | 1 | 1 | 4   | 0.1218695  | 0.00530919 | 1 | 10 | 0.1218695  | 1.2568129  |
| chr19 | 5456816 | 5706752 | 249937 | 7 | 1 | 5   | 0.1218695  | 0.01320236 | 1 | 10 | 0.1218695  | 0.97390707 |
| chr19 | 5706752 | 5727261 | 20510  | 2 | 1 | 5   | 0.02438896 | 0.01320236 | 3 | 10 | 0.51676182 | 0.97390707 |
| chr19 | 5727261 | 5739391 | 12131  | 2 | 1 | 5   | 0.01091641 | 0.01320236 | 4 | 10 | 0.76005302 | 0.97390707 |
| chr19 | 5739391 | 5754180 | 14790  | 1 | 1 | 4   | 0.01091641 | 0.00530919 | 4 | 10 | 0.76005302 | 1.2568129  |
| chr19 | 5754180 | 5778696 | 24517  | 1 | 1 | 3   | 0.01091641 | 0.00170589 | 4 | 10 | 0.76005302 | 1.61091002 |
| chr19 | 5778696 | 5778750 | 55     | 1 | 2 | 3   | 0.0429175  | 0.00170589 | 4 | 10 | 0.47744371 | 1.61091002 |
| chr19 | 5778750 | 5812673 | 33924  | 1 | 1 | 3   | 0.01091641 | 0.00170589 | 4 | 10 | 0.76005302 | 1.61091002 |
| chr19 | 5812673 | 5825503 | 12831  | 2 | 1 | 4   | 0.01091641 | 0.00530919 | 4 | 10 | 0.76005302 | 1.2568129  |
| chr19 | 5825503 | 5865845 | 40343  | 3 | 1 | 3   | 0.01091641 | 0.00170589 | 4 | 10 | 0.76005302 | 1.61091002 |
| chr19 | 5865845 | 5901502 | 35658  | 3 | 1 | 4   | 0.01091641 | 0.00530919 | 4 | 10 | 0.76005302 | 1.2568129  |
| chr19 | 5901502 | 5915788 | 14287  | 2 | 1 | 4   | 0.0429175  | 0.00530919 | 4 | 10 | 0.47744371 | 1.2568129  |
| chr19 | 5915788 | 5917080 | 1293   | 2 | 3 | 4   | 0.10122019 | 0.00530919 | 4 | 10 | 0.30102999 | 1.2568129  |
| chr19 | 5917080 | 5971688 | 54609  | 2 | 3 | 4   | 0.17593012 | 0.00530919 | 3 | 10 | 0.17593012 | 1.2568129  |
| chr19 | 5971688 | 6026184 | 54497  | 2 | 3 | 4   | 0.10122019 | 0.00530919 | 4 | 10 | 0.30102999 | 1.2568129  |
| chr19 | 6026184 | 6182836 | 156653 | 7 | 4 | 4   | 0.18734596 | 0.00530919 | 4 | 10 | 0.18734596 | 1.2568129  |
| chr19 | 6182836 | 6225039 | 42204  | 2 | 3 | 4   | 0.10122019 | 0.00530919 | 4 | 10 | 0.30102999 | 1.2568129  |
| chr19 | 6225039 | 6277866 | 52828  | 1 | 3 | 4   | 0.17593012 | 0.00530919 | 3 | 10 | 0.17593012 | 1.2568129  |
| chr19 | 6277866 | 6413589 | 135724 | 5 | 3 | 4   | 0.17593012 | 0.01077081 | 3 | 9  | 0.17593012 | 1.01542894 |
| chr19 | 6413589 | 6441738 | 28150  | 3 | 4 | 4   | 0.30102999 | 0.01077081 | 3 | 9  | 0.10122019 | 1.01542894 |
| chr19 | 6441738 | 6470009 | 28272  | 2 | 3 | 4   | 0.17593012 | 0.01077081 | 3 | 9  | 0.17593012 | 1.01542894 |
| chr19 | 6470009 | 6535607 | 65599  | 4 | 4 | 4   | 0.30102999 | 0.01077081 | 3 | 9  | 0.10122019 | 1.01542894 |
| chr19 | 6535607 | 6719938 | 184332 | 6 | 3 | 4   | 0.17593012 | 0.01077081 | 3 | 9  | 0.17593012 | 1.01542894 |
| chr19 | 6719938 | 6928242 | 208305 | 9 | 4 | 4   | 0.30102999 | 0.01077081 | 3 | 9  | 0.10122019 | 1.01542894 |
| chr19 | 6928242 | 6986278 | 58037  | 2 | 4 | 4   | 0.30102999 | 0.02074938 | 3 | 8  | 0.10122019 | 0.79906872 |
| chr19 | 6986278 | 6986337 | 60     | 1 | 4 | 4   | 0.30102999 | 0.00530919 | 3 | 10 | 0.10122019 | 1.2568129  |
| chr19 | 6986337 | 7070410 | 84074  | 1 | 3 | 4   | 0.17593012 | 0.00530919 | 3 | 10 | 0.17593012 | 1.2568129  |
| chr19 | 7070410 | 7083781 | 13372  | 2 | 3 | 5   | 0.17593012 | 0.01320236 | 3 | 10 | 0.17593012 | 0.97390707 |
| chr19 | 7083781 | 7205362 | 121582 | 5 | 3 | 4   | 0.17593012 | 0.00530919 | 3 | 10 | 0.17593012 | 1.2568129  |
| chr19 | 7205362 | 7205421 | 60     | 1 | 3 | 4   | 0.10122019 | 0.00530919 | 4 | 10 | 0.30102999 | 1.2568129  |
| chr19 | 7205421 | 7303650 | 98230  | 3 | 2 | 4   | 0.0429175  | 0.00530919 | 4 | 10 | 0.47744371 | 1.2568129  |
| chr19 | 7303650 | 7303709 | 60     | 1 | 3 | 4   | 0.10122019 | 0.00530919 | 4 | 10 | 0.30102999 | 1.2568129  |
| chr19 | 7303709 | 7483030 | 179322 | 2 | 2 | 4   | 0.0429175  | 0.01077081 | 4 | 9  | 0.47744371 | 1.01542894 |
| chr19 | 7483030 | 7483089 | 60     | 1 | 3 | 4   | 0.05670724 | 0.01077081 | 5 | 9  | 0.45545077 | 1.01542894 |
| chr19 | 7483089 | 7521300 | 38212  | 3 | 4 | 4   | 0.10122019 | 0.01077081 | 4 | 9  | 0.30102999 | 1.01542894 |
| chr19 | 7521300 | 7537269 | 159710 | 3 | 3 | 4   | 0.10122019 | 0.02074938 | 8 | 6  | 0.30102999 | 0.79906872 |
| chr19 | 7537269 | 7554290 | 17022  | 3 | 3 | 4   | 0.03070643 | 0.02074938 | 6 | 6  | 0.63695542 | 0.79906872 |
| chr19 | 7554290 | 7586147 | 31858  | 1 | 3 | 4   | 0.05670724 | 0.02074938 | 5 | 8  | 0.45545077 | 0.79906872 |
| chr19 | 7586147 | 7688543 | 102397 | 6 | 3 | 4   | 0.05670724 | 0.00530919 | 5 | 10 | 0.45545077 | 1.2568129  |
| chr19 | 7688543 | 7743475 | 54933  | 3 | 3 | 4   | 0.10122019 | 0.00530919 | 4 | 10 | 0.30102999 | 1.2568129  |
| chr19 | 7743475 | 7806644 | 63170  | 3 | 2 | 4   | 0.08289318 | 0.00530919 | 3 | 10 | 0.30102999 | 1.2568129  |
| chr19 | 7806644 | 7831845 | 25202  | 3 | 2 | 4   | 0.0429175  | 0.00530919 | 4 | 10 | 0.47744371 | 1.2568129  |
| chr19 | 7831845 | 7849357 | 17513  | 2 | 3 | 4   | 0.10122019 | 0.00530919 | 4 | 10 | 0.30102999 | 1.2568129  |
| chr19 | 7849357 | 7918816 | 69460  | 2 | 2 | 4   | 0.0429175  | 0.01077081 | 4 | 9  | 0.47744371 | 1.01542894 |
| chr19 | 7918816 | 7918874 | 59     | 1 | 3 | 4   | 0.05670724 | 0.00530919 | 5 | 10 | 0.45545077 | 1.2568129  |
| chr19 | 7918874 | 7988098 | 69225  | 4 | 2 | 4   | 0.02162467 | 0.00530919 | 5 | 10 | 0.68214471 | 1.2568129  |
| chr19 | 7988098 | 7991632 | 3535   | 2 | 2 | 4   | 0.02162467 | 0.01320236 | 5 | 10 | 0.68214471 | 0.97390707 |
| chr19 | 7991632 | 8035554 | 43929  | 2 | 2 | 6   | 0.01053319 | 0.02793176 | 6 | 10 | 0.91219088 | 0.74627054 |
| chr19 | 8035554 | 8056662 | 21109  | 2 | 6 | 6   | 0.02162467 | 0.04875589 | 5 | 9  | 0.68214471 | 0.5732208  |
| chr19 | 8056662 | 8068687 | 12026  | 2 | 3 | 6   | 0.05670724 | 0.04875589 | 5 | 9  | 0.45545077 | 0.5732208  |
| chr19 | 8068687 | 8086329 | 17643  | 1 | 3 | 5   | 0.05670724 | 0.04407651 | 5 | 8  | 0.45545077 | 0.58747015 |
| chr19 | 8086329 | 8086388 | 60     | 1 | 4 | 5   | 0.11390336 | 0.02473314 | 4 | 9  | 0.30102999 | 0.76806864 |
| chr19 | 8086388 | 8127491 | 41104  | 1 | 4 | 5   | 0.18734596 | 0.02473314 | 4 | 9  | 0.18734596 | 0.76806864 |
| chr19 | 8127491 | 8167708 | 40218  | 3 | 4 | 6   | 0.11390336 | 0.04875589 | 5 | 9  | 0.30102999 | 0.5732208  |
| chr19 | 8167708 | 8167758 | 51     | 1 | 4 | 6   | 0.06713722 | 0.04875589 | 6 | 9  | 0.44141547 | 0.5732208  |
| chr19 | 8167758 | 8267730 | 99973  | 3 | 3 | 5   | 0.05670724 | 0.04407651 | 5 | 8  | 0.45545077 | 0.58747015 |
| chr19 | 8267730 | 8267789 | 60     | 1 | 3 | 5   | 0.03070643 | 0.02473314 | 6 | 9  | 0.63695542 | 0.76806864 |
| chr19 | 8267789 | 8385653 | 117865 | 4 | 2 | 5   | 0.01053319 | 0.02473314 | 6 | 9  | 0.91219088 | 0.76806864 |
| chr19 | 8385653 | 8435667 | 50015  | 3 | 2 | 5   | 0.01053319 | 0.01320236 | 6 | 10 | 0.91219088 | 0.97390707 |
| chr19 | 8435667 | 8520434 | 84768  | 3 | 1 | 5   | 0.00204627 | 0.01320236 | 6 | 10 | 1.31360226 | 0.97390707 |
| chr19 | 8520434 | 8532495 | 12062  | 1 | 5 | 5</ |            |            |   |    |            |            |

|       |          |          |         |    |   |   |            |            |    |   |            |            |
|-------|----------|----------|---------|----|---|---|------------|------------|----|---|------------|------------|
| chr19 | 9923327  | 9928417  | 5091    | 2  | 3 | 4 | 0.05670724 | 0.18734596 | 5  | 4 | 0.45545077 | 0.18734596 |
| chr19 | 9928417  | 9951939  | 23523   | 1  | 3 | 3 | 0.05670724 | 0.10122019 | 5  | 4 | 0.45545077 | 0.30102999 |
| chr19 | 9951939  | 9986808  | 34870   | 1  | 2 | 3 | 0.02162467 | 0.10122019 | 5  | 4 | 0.68214471 | 0.30102999 |
| chr19 | 9986808  | 10088783 | 101976  | 6  | 2 | 4 | 0.02162467 | 0.18734596 | 5  | 4 | 0.68214471 | 0.18734596 |
| chr19 | 10088783 | 10108495 | 19713   | 2  | 2 | 4 | 0.02162467 | 0.11390336 | 5  | 5 | 0.68214471 | 0.30102999 |
| chr19 | 10108495 | 10108551 | 57      | 1  | 3 | 4 | 0.05670724 | 0.11390336 | 5  | 5 | 0.45545077 | 0.30102999 |
| chr19 | 10108551 | 10158842 | 50292   | 2  | 3 | 4 | 0.05670724 | 0.18734596 | 5  | 4 | 0.45545077 | 0.18734596 |
| chr19 | 10158842 | 10203763 | 44922   | 4  | 5 | 4 | 0.19510895 | 0.06713722 | 5  | 6 | 0.19510895 | 0.44141547 |
| chr19 | 10203763 | 10227804 | 24042   | 2  | 5 | 4 | 0.19510895 | 0.11390336 | 5  | 5 | 0.19510895 | 0.30102999 |
| chr19 | 10227804 | 10267141 | 39338   | 1  | 5 | 4 | 0.30102999 | 0.11390336 | 4  | 5 | 0.11390336 | 0.30102999 |
| chr19 | 10267141 | 10284528 | 17388   | 1  | 5 | 3 | 0.30102999 | 0.05670724 | 4  | 5 | 0.11390336 | 0.45545077 |
| chr19 | 10284528 | 10423927 | 139400  | 10 | 6 | 3 | 0.08122616 | 0.05670724 | 8  | 5 | 0.4250187  | 0.45545077 |
| chr19 | 10423927 | 10430203 | 6277    | 2  | 6 | 4 | 0.08122616 | 0.11390336 | 8  | 5 | 0.4250187  | 0.30102999 |
| chr19 | 10430203 | 10489303 | 59101   | 4  | 6 | 3 | 0.08122616 | 0.05670724 | 8  | 5 | 0.4250187  | 0.45545077 |
| chr19 | 10489303 | 10503217 | 13915   | 2  | 6 | 5 | 0.08122616 | 0.19510895 | 8  | 5 | 0.4250187  | 0.19510895 |
| chr19 | 10503217 | 10545184 | 41968   | 2  | 6 | 4 | 0.08122616 | 0.11390336 | 8  | 5 | 0.4250187  | 0.30102999 |
| chr19 | 10545184 | 10559582 | 14399   | 2  | 7 | 5 | 0.13499366 | 0.19510895 | 8  | 5 | 0.30102999 | 0.19510895 |
| chr19 | 10559582 | 10559626 | 45      | 1  | 7 | 5 | 0.08584816 | 0.12309572 | 9  | 6 | 0.42015402 | 0.30102999 |
| chr19 | 10559626 | 10601524 | 41899   | 3  | 7 | 4 | 0.08584816 | 0.06713722 | 9  | 6 | 0.42015402 | 0.44141547 |
| chr19 | 10601524 | 10659088 | 57575   | 4  | 8 | 4 | 0.08923391 | 0.06713722 | 10 | 6 | 0.4167287  | 0.44141547 |
| chr19 | 10659088 | 10734053 | 74955   | 5  | 8 | 4 | 0.13872638 | 0.06713722 | 9  | 6 | 0.30102999 | 0.44141547 |
| chr19 | 10734053 | 10754046 | 14994   | 3  | 8 | 4 | 0.08923391 | 0.06713722 | 10 | 6 | 0.4167287  | 0.44141547 |
| chr19 | 10754046 | 10835730 | 81685   | 3  | 8 | 4 | 0.13872638 | 0.06713722 | 9  | 6 | 0.30102999 | 0.44141547 |
| chr19 | 10835730 | 10904982 | 69253   | 3  | 8 | 4 | 0.08923391 | 0.06713722 | 10 | 6 | 0.4167287  | 0.44141547 |
| chr19 | 10904982 | 10948056 | 43075   | 2  | 8 | 4 | 0.13872638 | 0.06713722 | 9  | 6 | 0.30102999 | 0.44141547 |
| chr19 | 10948056 | 11000305 | 52250   | 2  | 5 | 5 | 0.13872638 | 0.12309572 | 9  | 6 | 0.30102999 | 0.30102999 |
| chr19 | 11000305 | 11033781 | 33477   | 2  | 8 | 5 | 0.08923391 | 0.12309572 | 10 | 6 | 0.4167287  | 0.30102999 |
| chr19 | 11033781 | 11040508 | 6728    | 1  | 8 | 4 | 0.08923391 | 0.06713722 | 10 | 6 | 0.4167287  | 0.44141547 |
| chr19 | 11040508 | 11077733 | 37226   | 1  | 7 | 4 | 0.13499366 | 0.06713722 | 8  | 6 | 0.30102999 | 0.44141547 |
| chr19 | 11077733 | 11117479 | 39747   | 3  | 7 | 5 | 0.13499366 | 0.12309572 | 8  | 6 | 0.30102999 | 0.30102999 |
| chr19 | 11117479 | 11172566 | 55088   | 2  | 6 | 5 | 0.08122616 | 0.12309572 | 8  | 6 | 0.4250187  | 0.30102999 |
| chr19 | 11172566 | 11218032 | 45467   | 2  | 6 | 5 | 0.08584816 | 0.12309572 | 9  | 6 | 0.42015402 | 0.30102999 |
| chr19 | 11218032 | 11230809 | 12778   | 1  | 6 | 5 | 0.04875589 | 0.12309572 | 9  | 6 | 0.5732208  | 0.30102999 |
| chr19 | 11230809 | 11260059 | 29251   | 2  | 6 | 5 | 0.04875589 | 0.19510895 | 9  | 5 | 0.5732208  | 0.19510895 |
| chr19 | 11260059 | 11275021 | 14963   | 2  | 6 | 6 | 0.04875589 | 0.30102999 | 9  | 5 | 0.5732208  | 0.12309572 |
| chr19 | 11275021 | 11280557 | 5537    | 1  | 6 | 6 | 0.08122616 | 0.30102999 | 8  | 5 | 0.4250187  | 0.12309572 |
| chr19 | 11280557 | 11291432 | 10876   | 2  | 6 | 6 | 0.08122616 | 0.20064824 | 8  | 6 | 0.4250187  | 0.20064824 |
| chr19 | 11291432 | 11306149 | 14718   | 1  | 6 | 6 | 0.129913   | 0.20064824 | 7  | 6 | 0.30102999 | 0.20064824 |
| chr19 | 11306149 | 11373737 | 67589   | 1  | 6 | 6 | 0.129913   | 0.30102999 | 7  | 5 | 0.30102999 | 0.12309572 |
| chr19 | 11373737 | 11373796 | 60      | 1  | 6 | 6 | 0.08122616 | 0.30102999 | 8  | 5 | 0.4250187  | 0.12309572 |
| chr19 | 11373796 | 11406991 | 33196   | 1  | 6 | 5 | 0.08122616 | 0.19510895 | 8  | 5 | 0.4250187  | 0.19510895 |
| chr19 | 11406991 | 11457995 | 51005   | 5  | 7 | 5 | 0.13499366 | 0.19510895 | 8  | 5 | 0.30102999 | 0.19510895 |
| chr19 | 11457995 | 11474716 | 16722   | 1  | 6 | 5 | 0.08122616 | 0.19510895 | 8  | 5 | 0.4250187  | 0.19510895 |
| chr19 | 11474716 | 11488646 | 13931   | 3  | 6 | 6 | 0.08122616 | 0.30102999 | 8  | 5 | 0.4250187  | 0.12309572 |
| chr19 | 11488646 | 11511834 | 23189   | 1  | 5 | 6 | 0.04407651 | 0.30102999 | 8  | 5 | 0.58747015 | 0.12309572 |
| chr19 | 11511834 | 11531532 | 19699   | 2  | 6 | 6 | 0.04875589 | 0.30102999 | 9  | 5 | 0.5732208  | 0.12309572 |
| chr19 | 11531532 | 11613371 | 81840   | 10 | 7 | 6 | 0.08584816 | 0.30102999 | 9  | 5 | 0.42015402 | 0.12309572 |
| chr19 | 11613371 | 11661106 | 47736   | 4  | 6 | 6 | 0.04875589 | 0.30102999 | 9  | 5 | 0.5732208  | 0.12309572 |
| chr19 | 11661106 | 11687328 | 26223   | 1  | 6 | 6 | 0.08122616 | 0.44141547 | 4  | 4 | 0.4250187  | 0.06713722 |
| chr19 | 11687328 | 11687932 | 605     | 2  | 6 | 6 | 0.13499366 | 0.44141547 | 4  | 4 | 0.30102999 | 0.06713722 |
| chr19 | 11687932 | 11866242 | 178311  | 3  | 5 | 6 | 0.04407651 | 0.44141547 | 4  | 4 | 0.58747015 | 0.06713722 |
| chr19 | 11866242 | 11866301 | 60      | 1  | 5 | 6 | 0.02473314 | 0.30102999 | 5  | 5 | 0.76806864 | 0.12309572 |
| chr19 | 11866301 | 11918573 | 52273   | 1  | 4 | 6 | 0.01077081 | 0.30102999 | 9  | 5 | 1.01542894 | 0.12309572 |
| chr19 | 11918573 | 11979543 | 60971   | 2  | 5 | 6 | 0.02473314 | 0.30102999 | 9  | 5 | 0.76806864 | 0.12309572 |
| chr19 | 11979543 | 12105697 | 126155  | 2  | 4 | 6 | 0.02074938 | 0.30102999 | 4  | 5 | 0.79906872 | 0.12309572 |
| chr19 | 12105697 | 12105756 | 60      | 1  | 7 | 6 | 0.05232577 | 0.30102999 | 10 | 5 | 0.56314362 | 0.12309572 |
| chr19 | 12105756 | 12128888 | 23133   | 1  | 5 | 6 | 0.02473314 | 0.30102999 | 9  | 5 | 0.76806864 | 0.12309572 |
| chr19 | 12128888 | 12144946 | 16059   | 1  | 5 | 6 | 0.04407651 | 0.30102999 | 8  | 5 | 0.58747015 | 0.12309572 |
| chr19 | 12144946 | 12145005 | 60      | 1  | 7 | 6 | 0.08584816 | 0.30102999 | 9  | 5 | 0.42015402 | 0.12309572 |
| chr19 | 12145005 | 12191995 | 46991   | 1  | 7 | 6 | 0.08584816 | 0.44141547 | 9  | 4 | 0.42015402 | 0.06713722 |
| chr19 | 12191995 | 12242867 | 50873   | 1  | 7 | 5 | 0.20469099 | 0.30102999 | 7  | 4 | 0.20469099 | 0.11390336 |
| chr19 | 12242867 | 12256966 | 14100   | 3  | 7 | 5 | 0.13499366 | 0.30102999 | 8  | 4 | 0.30102999 | 0.11390336 |
| chr19 | 12256966 | 12278707 | 21742   | 1  | 5 | 5 | 0.04407651 | 0.30102999 | 8  | 4 | 0.58747015 | 0.11390336 |
| chr19 | 12278707 | 12278766 | 60      | 1  | 7 | 7 | 0.13499366 | 0.60763643 | 8  | 4 | 0.30102999 | 0.03812622 |
| chr19 | 12278766 | 12296782 | 18017   | 1  | 5 | 7 | 0.07511598 | 0.60763643 | 7  | 4 | 0.43181735 | 0.03812622 |
| chr19 | 12296782 | 12361694 | 64913   | 1  | 7 | 6 | 0.12309572 | 0.60763643 | 6  | 4 | 0.30102999 | 0.03812622 |
| chr19 | 12361694 | 12361753 | 60      | 1  | 7 | 7 | 0.30102999 | 0.43181735 | 3  | 5 | 0.129913   | 0.07511598 |
| chr19 | 12361753 | 12433780 | 70208   | 4  | 5 | 7 | 0.12309572 | 0.84395715 | 6  | 6 | 0.30102999 | 0.01598258 |
| chr19 | 12433780 | 12433839 | 60      | 1  | 7 | 7 | 0.30102999 | 0.43181735 | 6  | 6 | 0.129913   | 0.07511598 |
| chr19 | 12433839 | 12527157 | 93319   | 3  | 5 | 7 | 0.12309572 | 0.84395715 | 6  | 6 | 0.30102999 | 0.01598258 |
| chr19 | 12527157 | 12527216 | 60      | 1  | 5 | 7 | 0.12309572 | 0.60763643 | 6  | 4 | 0.30102999 | 0.03812622 |
| chr19 | 12527216 | 12615664 | 89449   | 4  | 4 | 7 | 0.06713722 | 0.84395715 | 6  | 3 | 0.44141547 | 0.01598258 |
| chr19 | 12615664 | 12675642 | 59979   | 4  | 4 | 7 | 0.11390336 | 0.84395715 | 5  | 3 | 0.30102999 | 0.01598258 |
| chr19 | 12675642 | 12675701 | 60      | 1  | 4 | 7 | 0.11390336 | 0.60763643 | 5  | 4 | 0.30102999 | 0.03812622 |
| chr19 | 12675701 | 12766741 | 91041   | 5  | 3 | 7 | 0.05670724 | 0.84395715 | 5  | 3 | 0.45545077 | 0.01598258 |
| chr19 | 12766741 | 12903808 | 137068  | 12 | 4 | 7 | 0.11390336 | 0.84395715 | 5  | 3 | 0.30102999 | 0.01598258 |
| chr19 | 12903808 | 12918366 | 14559   | 3  | 4 | 7 | 0.06713722 | 0.84395715 | 6  | 3 | 0.44141547 | 0.01598258 |
| chr19 | 12918366 | 12989416 | 71051   | 3  | 4 | 6 | 0.06713722 | 0.91219088 | 6  | 2 | 0.44141547 | 0.01053319 |
| chr19 | 12989416 | 12995235 | 5820    | 2  | 4 | 6 | 0.03812622 | 0.91219088 | 7  | 2 | 0.60763643 | 0.01053319 |
| chr19 | 12995235 | 13009209 | 13975   | 3  | 4 | 6 | 0.02074938 | 0.91219088 | 8  | 2 | 0.79906872 | 0.01053319 |
| chr19 | 13009209 | 13041833 | 32625   | 1  | 4 | 5 | 0.03812622 | 0.68214471 | 7  | 2 | 0.60763643 | 0.02162467 |
| chr19 | 13041833 | 13050384 | 8552    | 2  | 5 | 5 | 0.07511598 | 0.68214471 | 7  | 2 | 0.43181735 | 0.02162467 |
| chr19 | 13050384 | 13136390 | 86007   | 6  | 5 | 5 | 0.04407651 | 0.68214471 | 8  | 2 | 0.58747015 | 0.02162467 |
| chr19 | 13136390 | 13237941 | 101552  | 8  | 6 | 5 | 0.08122616 | 0.68214471 | 8  | 2 | 0.4250187  | 0.02162467 |
| chr19 | 13237941 | 13237998 | 58      | 1  | 7 | 5 | 0.13499366 | 0.68214471 | 8  | 2 | 0.30102999 | 0.02162467 |
| chr19 | 13237998 | 13259858 | 21861   | 2  | 6 | 5 | 0.08122616 | 0.68214471 | 8  | 2 | 0.4250187  | 0.02162467 |
| chr19 | 13259858 | 13317512 | 57655   | 2  | 7 | 5 | 0.13499366 | 0.68214471 | 8  | 2 | 0.30102999 | 0.02162467 |
| chr19 | 13317512 | 13352580 | 35069   | 3  | 8 | 5 | 0.20764654 | 0.45545077 | 8  | 3 | 0.20764654 | 0.05670724 |
| chr19 | 13352580 | 13419203 | 66624   | 1  | 7 | 5 | 0.13499366 | 0.45545077 | 8  | 3 | 0.30102999 | 0.05670724 |
| chr19 | 13419203 | 13476169 | 56967</ |    |   |   |            |            |    |   |            |            |

|       |           |           |        |    |    |   |            |            |    |   |             |            |
|-------|-----------|-----------|--------|----|----|---|------------|------------|----|---|-------------|------------|
| chr19 | 15124588  | 15166682  | 42095  | 2  | 2  | 4 | 0.08289318 | 0.18734596 | 3  | 4 | 0.30102999  | 0.18734596 |
| chr19 | 15166682  | 15201885  | 35204  | 1  | 2  | 4 | 0.1575501  | 0.18734596 | 2  | 4 | 0.1575501   | 0.18734596 |
| chr19 | 15201885  | 15201944  | 60     | 1  | 2  | 4 | 0.0429175  | 0.18734596 | 4  | 4 | 0.47744371  | 0.18734596 |
| chr19 | 15201944  | 15225722  | 23779  | 1  | 2  | 4 | 0.08289318 | 0.18734596 | 3  | 4 | 0.30102999  | 0.18734596 |
| chr19 | 15225722  | 15230897  | 5176   | 2  | 2  | 4 | 0.0429175  | 0.18734596 | 4  | 4 | 0.47744371  | 0.18734596 |
| chr19 | 15230897  | 15338118  | 107222 | 5  | 2  | 4 | 0.02162467 | 0.18734596 | 5  | 4 | 0.68214471  | 0.18734596 |
| chr19 | 15338118  | 15338167  | 50     | 1  | 2  | 4 | 0.01053319 | 0.18734596 | 6  | 4 | 0.91219088  | 0.18734596 |
| chr19 | 15338167  | 15379869  | 41703  | 2  | 2  | 4 | 0.02162467 | 0.18734596 | 5  | 4 | 0.68214471  | 0.18734596 |
| chr19 | 15379869  | 15425644  | 45776  | 2  | 2  | 4 | 0.0429175  | 0.18734596 | 4  | 4 | 0.47744371  | 0.18734596 |
| chr19 | 15425644  | 15491798  | 66555  | 4  | 2  | 4 | 0.02162467 | 0.18734596 | 5  | 4 | 0.68214471  | 0.18734596 |
| chr19 | 15491798  | 15532335  | 40538  | 4  | 2  | 4 | 0.01053319 | 0.18734596 | 6  | 4 | 0.91219088  | 0.18734596 |
| chr19 | 15532335  | 15534371  | 2037   | 2  | 2  | 4 | 0.00493743 | 0.18734596 | 7  | 4 | 1.16581773  | 0.18734596 |
| chr19 | 15534371  | 15579872  | 45502  | 2  | 2  | 4 | 0.01053319 | 0.18734596 | 6  | 4 | 0.91219088  | 0.18734596 |
| chr19 | 15579872  | 15633081  | 53210  | 1  | 2  | 4 | 0.02162467 | 0.18734596 | 5  | 4 | 0.68214471  | 0.18734596 |
| chr19 | 15633081  | 15655428  | 22348  | 3  | 5  | 5 | 0.02162467 | 0.30102999 | 5  | 5 | 0.68214471  | 0.11990336 |
| chr19 | 15655428  | 15771023  | 115996 | 3  | 3  | 3 | 0.02162467 | 0.10122019 | 5  | 4 | 0.68214471  | 0.30102999 |
| chr19 | 15771023  | 15771082  | 60     | 1  | 2  | 3 | 0.01053319 | 0.10122019 | 6  | 4 | 0.91219088  | 0.30102999 |
| chr19 | 15771082  | 16192533  | 421452 | 14 | 2  | 3 | 0.02162467 | 0.10122019 | 5  | 4 | 0.68214471  | 0.30102999 |
| chr19 | 16192533  | 16210862  | 18330  | 2  | 2  | 3 | 0.01053319 | 0.10122019 | 6  | 4 | 0.91219088  | 0.30102999 |
| chr19 | 16210862  | 16272179  | 61318  | 4  | 2  | 3 | 0.02162467 | 0.10122019 | 5  | 4 | 0.68214471  | 0.30102999 |
| chr19 | 16272179  | 16289807  | 26729  | 3  | 3  | 3 | 0.00493743 | 0.10122019 | 7  | 4 | 1.16581773  | 0.30102999 |
| chr19 | 16289807  | 16346101  | 47195  | 2  | 2  | 3 | 0.01053319 | 0.10122019 | 6  | 4 | 0.91219088  | 0.30102999 |
| chr19 | 16346101  | 16346160  | 60     | 1  | 2  | 3 | 0.00493743 | 0.10122019 | 7  | 4 | 1.16581773  | 0.30102999 |
| chr19 | 16346160  | 16438239  | 92080  | 1  | 2  | 3 | 0.01053319 | 0.10122019 | 6  | 4 | 0.91219088  | 0.30102999 |
| chr19 | 16438239  | 16470807  | 32569  | 3  | 2  | 3 | 0.00493743 | 0.10122019 | 7  | 4 | 1.16581773  | 0.30102999 |
| chr19 | 16470807  | 16552979  | 82173  | 3  | 3  | 3 | 0.01598258 | 0.10122019 | 7  | 4 | 0.849395715 | 0.30102999 |
| chr19 | 16552979  | 16581389  | 28411  | 2  | 3  | 3 | 0.0079614  | 0.10122019 | 8  | 4 | 1.07548421  | 0.30102999 |
| chr19 | 16581389  | 16640237  | 58849  | 6  | 3  | 3 | 0.00378107 | 0.10122019 | 9  | 4 | 1.33111237  | 0.30102999 |
| chr19 | 16640237  | 16681497  | 41261  | 2  | 3  | 3 | 0.00378107 | 0.05670724 | 9  | 5 | 1.33111237  | 0.45545077 |
| chr19 | 16681497  | 16723054  | 41558  | 5  | 3  | 3 | 0.00170589 | 0.05670724 | 10 | 5 | 1.61091002  | 0.45545077 |
| chr19 | 16723054  | 16772843  | 49790  | 4  | 3  | 3 | 0.00378107 | 0.05670724 | 9  | 5 | 1.33111237  | 0.45545077 |
| chr19 | 16772843  | 16783029  | 10187  | 2  | 3  | 3 | 0.00170589 | 0.05670724 | 10 | 5 | 1.61091002  | 0.45545077 |
| chr19 | 16783029  | 16791419  | 8391   | 1  | 3  | 3 | 0.00378107 | 0.05670724 | 9  | 5 | 1.33111237  | 0.45545077 |
| chr19 | 16791419  | 16848440  | 57022  | 3  | 3  | 3 | 0.0079614  | 0.05670724 | 8  | 5 | 1.07548421  | 0.45545077 |
| chr19 | 16848440  | 17003240  | 154801 | 4  | 3  | 3 | 0.00378107 | 0.05670724 | 9  | 5 | 1.33111237  | 0.45545077 |
| chr19 | 17003240  | 17017019  | 13780  | 3  | 5  | 3 | 0.00666883 | 0.05670724 | 11 | 5 | 1.20557689  | 0.45545077 |
| chr19 | 17017019  | 17068691  | 51673  | 2  | 4  | 3 | 0.00530919 | 0.05670724 | 10 | 5 | 1.2568129   | 0.45545077 |
| chr19 | 17068691  | 17068750  | 60     | 1  | 4  | 3 | 0.00247414 | 0.05670724 | 11 | 5 | 1.52371709  | 0.45545077 |
| chr19 | 17068750  | 17087934  | 19185  | 1  | 4  | 3 | 0.00530919 | 0.05670724 | 10 | 5 | 1.2568129   | 0.45545077 |
| chr19 | 17087934  | 17107159  | 19226  | 2  | 5  | 3 | 0.00666883 | 0.05670724 | 11 | 5 | 1.20557689  | 0.45545077 |
| chr19 | 17107159  | 17107218  | 60     | 1  | 5  | 3 | 0.00317045 | 0.05670724 | 12 | 5 | 1.46403142  | 0.45545077 |
| chr19 | 17107218  | 17173780  | 66563  | 2  | 5  | 3 | 0.01320236 | 0.05670724 | 10 | 5 | 0.97390707  | 0.45545077 |
| chr19 | 17173780  | 17173839  | 60     | 1  | 5  | 3 | 0.00666883 | 0.05670724 | 11 | 5 | 1.20557689  | 0.45545077 |
| chr19 | 17173839  | 17235592  | 61754  | 1  | 5  | 3 | 0.01320236 | 0.05670724 | 10 | 5 | 0.97390707  | 0.45545077 |
| chr19 | 17235592  | 17264757  | 29166  | 2  | 6  | 3 | 0.02793176 | 0.05670724 | 10 | 5 | 0.74627054  | 0.45545077 |
| chr19 | 17264757  | 17264814  | 58     | 1  | 7  | 3 | 0.05232577 | 0.05670724 | 10 | 5 | 0.56314362  | 0.45545077 |
| chr19 | 17264814  | 17390155  | 125342 | 6  | 6  | 3 | 0.02793176 | 0.05670724 | 10 | 5 | 0.74627054  | 0.45545077 |
| chr19 | 17390155  | 17396732  | 6578   | 1  | 6  | 2 | 0.02793176 | 0.02162467 | 10 | 5 | 0.74627054  | 0.68214471 |
| chr19 | 17396732  | 17450470  | 53739  | 4  | 7  | 2 | 0.05232577 | 0.02162467 | 10 | 5 | 0.56314362  | 0.68214471 |
| chr19 | 17450470  | 17623422  | 172953 | 10 | 8  | 2 | 0.03209037 | 0.02162467 | 12 | 5 | 0.72109894  | 0.68214471 |
| chr19 | 17623422  | 17623471  | 50     | 1  | 8  | 2 | 0.01767679 | 0.02162467 | 13 | 5 | 0.91308053  | 0.68214471 |
| chr19 | 17623471  | 17646865  | 23395  | 2  | 8  | 2 | 0.03209037 | 0.02162467 | 12 | 5 | 0.72109894  | 0.68214471 |
| chr19 | 17646865  | 17806948  | 160084 | 7  | 8  | 2 | 0.01767679 | 0.02162467 | 13 | 5 | 0.91308053  | 0.68214471 |
| chr19 | 17806948  | 17831517  | 24570  | 2  | 8  | 2 | 0.00909834 | 0.02162467 | 14 | 5 | 1.13428373  | 0.68214471 |
| chr19 | 17831517  | 17878860  | 47344  | 3  | 9  | 2 | 0.01817691 | 0.02162467 | 14 | 5 | 0.90719478  | 0.68214471 |
| chr19 | 17878860  | 17915666  | 36807  | 2  | 9  | 2 | 0.0331093  | 0.02162467 | 13 | 5 | 0.71538971  | 0.68214471 |
| chr19 | 17915666  | 17927374  | 11709  | 2  | 9  | 2 | 0.01817691 | 0.02162467 | 14 | 5 | 0.90719478  | 0.68214471 |
| chr19 | 17927374  | 17972319  | 44946  | 3  | 9  | 2 | 0.0331093  | 0.0429175  | 13 | 4 | 0.71538971  | 0.47744371 |
| chr19 | 17972319  | 18024344  | 52026  | 4  | 9  | 2 | 0.0331093  | 0.02162467 | 13 | 5 | 0.71538971  | 0.68214471 |
| chr19 | 18024344  | 18052555  | 28212  | 1  | 9  | 2 | 0.056833   | 0.02162467 | 12 | 5 | 0.55190077  | 0.68214471 |
| chr19 | 18052555  | 18079656  | 27102  | 2  | 9  | 2 | 0.0331093  | 0.02162467 | 13 | 5 | 0.71538971  | 0.68214471 |
| chr19 | 18079656  | 18120227  | 40572  | 2  | 9  | 2 | 0.056833   | 0.02162467 | 12 | 5 | 0.55190077  | 0.68214471 |
| chr19 | 18120227  | 18180071  | 59845  | 5  | 9  | 2 | 0.0331093  | 0.02162467 | 13 | 5 | 0.71538971  | 0.68214471 |
| chr19 | 18180071  | 18197366  | 17296  | 3  | 10 | 2 | 0.0574087  | 0.02162467 | 13 | 5 | 0.54980098  | 0.68214471 |
| chr19 | 18197366  | 18286500  | 89135  | 3  | 9  | 2 | 0.0331093  | 0.02162467 | 13 | 5 | 0.71538971  | 0.68214471 |
| chr19 | 18286500  | 183319820 | 33321  | 4  | 9  | 2 | 0.056833   | 0.02162467 | 12 | 5 | 0.55190077  | 0.68214471 |
| chr19 | 183319820 | 18335349  | 15530  | 2  | 13 | 2 | 0.0331093  | 0.02162467 | 13 | 5 | 0.71538971  | 0.68214471 |
| chr19 | 18335349  | 18390848  | 55500  | 9  | 2  | 2 | 0.0331093  | 0.0429175  | 13 | 4 | 0.71538971  | 0.47744371 |
| chr19 | 18390848  | 18437696  | 46849  | 2  | 9  | 2 | 0.056833   | 0.0429175  | 12 | 4 | 0.55190077  | 0.47744371 |
| chr19 | 18437696  | 18505015  | 67320  | 3  | 9  | 2 | 0.0331093  | 0.0429175  | 13 | 4 | 0.71538971  | 0.47744371 |
| chr19 | 18505015  | 18518207  | 13192  | 3  | 9  | 2 | 0.0331093  | 0.08289318 | 13 | 3 | 0.71538971  | 0.30102999 |
| chr19 | 18518207  | 18543127  | 24921  | 2  | 9  | 2 | 0.056833   | 0.08289318 | 12 | 3 | 0.55190077  | 0.30102999 |
| chr19 | 18543127  | 18543181  | 55     | 1  | 9  | 2 | 0.0331093  | 0.08289318 | 13 | 3 | 0.71538971  | 0.30102999 |
| chr19 | 18543181  | 18553591  | 10411  | 1  | 9  | 2 | 0.056833   | 0.08289318 | 12 | 3 | 0.55190077  | 0.30102999 |
| chr19 | 18553591  | 18630162  | 76572  | 6  | 10 | 2 | 0.09290028 | 0.08289318 | 12 | 3 | 0.41314172  | 0.30102999 |
| chr19 | 18630162  | 18670324  | 40163  | 3  | 10 | 2 | 0.09290028 | 0.0429175  | 12 | 4 | 0.41314172  | 0.47744371 |
| chr19 | 18670324  | 18710894  | 40571  | 2  | 9  | 2 | 0.056833   | 0.0429175  | 12 | 4 | 0.55190077  | 0.47744371 |
| chr19 | 18710894  | 18760394  | 49501  | 4  | 10 | 2 | 0.09290028 | 0.0429175  | 12 | 4 | 0.41314172  | 0.47744371 |
| chr19 | 18760394  | 18805209  | 44816  | 2  | 10 | 2 | 0.14303407 | 0.0429175  | 11 | 4 | 0.30102999  | 0.47744371 |
| chr19 | 18805209  | 18822730  | 17522  | 2  | 10 | 2 | 0.09290028 | 0.0429175  | 12 | 4 | 0.41314172  | 0.47744371 |
| chr19 | 18822730  | 18839267  | 16538  | 1  | 10 | 2 | 0.14303407 | 0.0429175  | 11 | 4 | 0.30102999  | 0.47744371 |
| chr19 | 18839267  | 18878306  | 39040  | 1  | 10 | 2 | 0.21118145 | 0.0429175  | 10 | 4 | 0.21118145  | 0.47744371 |
| chr19 | 18878306  | 18944925  | 66620  | 3  | 10 | 2 | 0.14303407 | 0.02162467 | 11 | 5 | 0.30102999  | 0.68214471 |
| chr19 | 18944925  | 18944984  | 60     | 1  | 10 | 2 | 0.14303407 | 0.01053319 | 11 | 6 | 0.30102999  | 0.91219088 |
| chr19 | 18944984  | 18963985  | 19002  | 2  | 10 | 2 | 0.14303407 | 0.02162467 | 11 | 5 | 0.30102999  | 0.68214471 |
| chr19 | 18963985  | 19000001  | 36017  | 1  | 9  | 2 | 0.14135546 | 0.02162467 | 10 | 5 | 0.30102999  | 0.68214471 |
| chr19 | 19000001  | 19000055  | 55     | 1  | 9  | 2 | 0.14135546 | 0.01053319 | 10 | 6 | 0.30102999  | 0.91219088 |
| chr19 | 19000055  | 19024903  | 24849  | 1  | 9  | 2 | 0.14135546 | 0.02162467 | 10 | 5 | 0.30102999  | 0.68214471 |
| chr19 | 19024903  | 19039459  | 14557  | 5  | 9  | 2 | 0.09154957 | 0.02162467 | 11 | 5 | 0.4144892   |            |



|       |          |          |        |   |   |   |            |            |   |   |            |            |
|-------|----------|----------|--------|---|---|---|------------|------------|---|---|------------|------------|
| chr19 | 20470640 | 20607860 | 137221 | 2 | 2 | 1 | 0.00221948 | 0.1218695  | 8 | 1 | 1.44210395 | 0.1218695  |
| chr19 | 20607860 | 20607913 | 54     | 1 | 2 | 1 | 0.00221948 | 0.05404976 | 8 | 2 | 1.44210395 | 0.30102999 |
| chr19 | 20607913 | 20719006 | 111094 | 1 | 2 | 1 | 0.00493743 | 0.1218695  | 7 | 1 | 1.16581773 | 0.1218695  |
| chr19 | 20719006 | 20785739 | 66734  | 1 | 2 | 1 | 0.01053319 | 0.30102999 | 6 | 0 | 0.91219088 | 0          |
| chr19 | 20785739 | 20897558 | 111820 | 2 | 2 | 1 | 0.02162467 | 0.30102999 | 5 | 0 | 0.68214471 | 0          |
| chr19 | 20897558 | 21001208 | 103651 | 4 | 2 | 1 | 0.01053319 | 0.30102999 | 6 | 0 | 0.91219088 | 0          |
| chr19 | 21001208 | 21121769 | 120562 | 2 | 2 | 1 | 0.02162467 | 0.30102999 | 5 | 0 | 0.68214471 | 0          |
| chr19 | 21121769 | 21179783 | 58015  | 2 | 2 | 1 | 0.08289318 | 0.30102999 | 3 | 0 | 0.30102999 | 0          |
| chr19 | 21179783 | 21179842 | 60     | 1 | 2 | 1 | 0.02162467 | 0.30102999 | 5 | 0 | 0.68214471 | 0          |
| chr19 | 21179842 | 21242458 | 62617  | 1 | 2 | 1 | 0.0429175  | 0.30102999 | 4 | 0 | 0.47744371 | 0          |
| chr19 | 21242458 | 21342867 | 100410 | 2 | 2 | 1 | 0.08289318 | 0.30102999 | 3 | 0 | 0.30102999 | 0          |
| chr19 | 21342867 | 21591468 | 248602 | 8 | 2 | 1 | 0.0429175  | 0.30102999 | 4 | 0 | 0.47744371 | 0          |
| chr19 | 21591468 | 21611444 | 19977  | 1 | 2 | 1 | 0.08289318 | 0.30102999 | 3 | 0 | 0.30102999 | 0          |
| chr19 | 21611444 | 21611503 | 60     | 1 | 2 | 1 | 0.02162467 | 0.30102999 | 5 | 0 | 0.68214471 | 0          |
| chr19 | 21611503 | 21659104 | 47602  | 1 | 2 | 1 | 0.0429175  | 0.30102999 | 4 | 0 | 0.47744371 | 0          |
| chr19 | 21659104 | 21659163 | 60     | 1 | 2 | 1 | 0.02162467 | 0.30102999 | 5 | 0 | 0.68214471 | 0          |
| chr19 | 21659163 | 21726215 | 67053  | 2 | 2 | 1 | 0.0429175  | 0.30102999 | 4 | 0 | 0.47744371 | 0          |
| chr19 | 21726215 | 21757846 | 31632  | 2 | 2 | 1 | 0.02162467 | 0.30102999 | 5 | 0 | 0.68214471 | 0          |
| chr19 | 21757846 | 21833793 | 75948  | 1 | 2 | 1 | 0.1575501  | 0.30102999 | 2 | 0 | 0.1575501  | 0          |
| chr19 | 21833793 | 21884318 | 50526  | 2 | 2 | 1 | 0.1575501  | 0.1218695  | 2 | 1 | 0.1575501  | 0.1218695  |
| chr19 | 21884318 | 22148582 | 264265 | 5 | 2 | 1 | 0.30102999 | 0.1218695  | 1 | 1 | 0.05404976 | 0.1218695  |
| chr19 | 22148582 | 22359551 | 210970 | 6 | 2 | 1 | 0.30102999 | 0.05404976 | 1 | 2 | 0.05404976 | 0.30102999 |
| chr19 | 22359551 | 22470583 | 111033 | 1 | 2 | 1 | 0.61140001 | 0.1218695  | 1 | 0 | 0          | 0.1218695  |
| chr19 | 22470583 | 22511285 | 40703  | 2 | 2 | 1 | 0.61140001 | 0.30102999 | 0 | 0 | 0          | 0.05404976 |
| chr19 | 22511285 | 22585326 | 74042  | 1 | 2 | 0 | 0.30102999 | 0.30102999 | 0 | 1 | 0          | 0.05404976 |
| chr19 | 22585326 | 22639015 | 53690  | 1 | 1 | 0 | 0.30102999 | 0.1218695  | 0 | 1 | 0          | 0.1218695  |
| chr19 | 22639015 | 22682468 | 43544  | 2 | 1 | 1 | 0.1218695  | 0.1218695  | 1 | 1 | 0.1218695  | 0.1218695  |
| chr19 | 22682468 | 22682527 | 60     | 1 | 1 | 1 | 0.1218695  | 0.05404976 | 1 | 2 | 0.1218695  | 0.30102999 |
| chr19 | 22682527 | 22786306 | 103780 | 2 | 1 | 0 | 0.30102999 | 0          | 0 | 1 | 0          | 0.30102999 |
| chr19 | 22786306 | 22786359 | 54     | 1 | 2 | 0 | 0.30102999 | 0          | 1 | 2 | 0.05404976 | 0.61140001 |
| chr19 | 22786359 | 22848375 | 62017  | 1 | 1 | 0 | 0.1218695  | 0          | 2 | 1 | 0.1218695  | 0.61140001 |
| chr19 | 22848375 | 22936709 | 88335  | 1 | 1 | 0 | 0.1218695  | 0          | 1 | 1 | 0.1218695  | 0.30102999 |
| chr19 | 22936709 | 23091827 | 155119 | 3 | 1 | 1 | 0.1218695  | 0.1218695  | 1 | 1 | 0.1218695  | 0.1218695  |
| chr19 | 23091827 | 23337121 | 245295 | 4 | 1 | 1 | 0.05404976 | 0.1218695  | 2 | 1 | 0.30102999 | 0.1218695  |
| chr19 | 23337121 | 23436600 | 99480  | 2 | 1 | 0 | 0.05404976 | 0          | 2 | 1 | 0.30102999 | 0.30102999 |
| chr19 | 23436600 | 23624787 | 188188 | 0 | 0 | 0 | 0          | 0          | 0 | 1 | 0          | 0.30102999 |
| chr19 | 24228709 | 24280790 | 52082  | 2 | 0 | 1 | 0          | 0.30102999 | 0 | 0 | 0          | 0          |
| chr19 | 28272497 | 28407342 | 134846 | 2 | 0 | 0 | 0          | 0          | 2 | 1 | 0.61140001 | 0.30102999 |
| chr19 | 28407342 | 28740835 | 333494 | 4 | 1 | 0 | 0.02438896 | 0          | 3 | 2 | 0.51676182 | 0.61140001 |
| chr19 | 28740835 | 28740894 | 60     | 1 | 0 | 0 | 0.02438896 | 0          | 3 | 3 | 0.51676182 | 0.93173516 |
| chr19 | 28740894 | 28990717 | 249824 | 3 | 1 | 0 | 0.02438896 | 0          | 3 | 2 | 0.51676182 | 0.61140001 |
| chr19 | 28990717 | 29079363 | 88647  | 3 | 1 | 0 | 0.08289318 | 0          | 3 | 3 | 0.30102999 | 0.93173516 |
| chr19 | 29079363 | 29107598 | 28236  | 1 | 2 | 0 | 0.08289318 | 0          | 3 | 2 | 0.30102999 | 0.61140001 |
| chr19 | 29107598 | 29200916 | 93319  | 3 | 3 | 0 | 0.10122019 | 0          | 4 | 2 | 0.30102999 | 0.61140001 |
| chr19 | 29200916 | 29200975 | 60     | 1 | 4 | 0 | 0.18734596 | 0          | 4 | 4 | 0.18734596 | 1.26272838 |
| chr19 | 29200975 | 29281545 | 80571  | 1 | 4 | 0 | 0.18734596 | 0          | 4 | 3 | 0.18734596 | 0.93173516 |
| chr19 | 29281545 | 29382353 | 100809 | 1 | 3 | 0 | 0.10122019 | 0          | 4 | 3 | 0.30102999 | 0.93173516 |
| chr19 | 29382353 | 29465911 | 83559  | 2 | 3 | 0 | 0.10122019 | 0          | 4 | 4 | 0.30102999 | 1.26272838 |
| chr19 | 29465911 | 29465970 | 60     | 1 | 4 | 0 | 0.18734596 | 0          | 4 | 4 | 0.18734596 | 1.26272838 |
| chr19 | 29465970 | 29702580 | 236611 | 2 | 3 | 0 | 0.10122019 | 0          | 4 | 4 | 0.30102999 | 1.26272838 |
| chr19 | 29702580 | 29738651 | 36072  | 2 | 4 | 0 | 0.18734596 | 0          | 4 | 4 | 0.18734596 | 1.26272838 |
| chr19 | 29738651 | 29830704 | 92054  | 1 | 3 | 0 | 0.10122019 | 0          | 4 | 4 | 0.30102999 | 1.26272838 |
| chr19 | 29830704 | 29830763 | 60     | 1 | 3 | 0 | 0.05670724 | 0          | 5 | 4 | 0.45545077 | 1.26272838 |
| chr19 | 29830763 | 30162231 | 331469 | 6 | 2 | 0 | 0.02162467 | 0          | 5 | 3 | 0.68214471 | 0.93173516 |
| chr19 | 30162231 | 30195494 | 33264  | 3 | 2 | 0 | 0.01053319 | 0          | 6 | 3 | 0.91219088 | 0.93173516 |
| chr19 | 30195494 | 30203962 | 8469   | 1 | 2 | 0 | 0.02162467 | 0          | 5 | 3 | 0.68214471 | 0.93173516 |
| chr19 | 30203962 | 30286892 | 82931  | 1 | 2 | 0 | 0.0429175  | 0          | 4 | 3 | 0.47744371 | 0.93173516 |
| chr19 | 30286892 | 30367630 | 80739  | 5 | 2 | 0 | 0.02162467 | 0          | 5 | 3 | 0.68214471 | 0.93173516 |
| chr19 | 30367630 | 30476151 | 108522 | 3 | 2 | 0 | 0.02162467 | 0          | 5 | 2 | 0.68214471 | 0.61140001 |
| chr19 | 30476151 | 30537343 | 61193  | 3 | 2 | 0 | 0.05670724 | 0          | 5 | 2 | 0.45545077 | 0.61140001 |
| chr19 | 30537343 | 30696858 | 159516 | 1 | 2 | 0 | 0.02162467 | 0          | 5 | 2 | 0.68214471 | 0.61140001 |
| chr19 | 30696858 | 30840001 | 143144 | 1 | 2 | 0 | 0.0429175  | 0          | 4 | 2 | 0.47744371 | 0.61140001 |
| chr19 | 30840001 | 30901113 | 61113  | 2 | 3 | 0 | 0.10122019 | 0          | 4 | 2 | 0.30102999 | 0.61140001 |
| chr19 | 30901113 | 30939618 | 38506  | 1 | 3 | 0 | 0.17593012 | 0          | 3 | 2 | 0.17593012 | 0.61140001 |
| chr19 | 30939618 | 31015936 | 76119  | 2 | 3 | 0 | 0.17593012 | 0          | 3 | 3 | 0.17593012 | 0.93173516 |
| chr19 | 31015936 | 31087489 | 71554  | 1 | 3 | 0 | 0.17593012 | 0          | 3 | 2 | 0.17593012 | 0.61140001 |
| chr19 | 31087489 | 31160735 | 73188  | 1 | 3 | 0 | 0.17593012 | 0          | 3 | 3 | 0.17593012 | 0.30102999 |
| chr19 | 31160735 | 31285146 | 124412 | 1 | 3 | 0 | 0.17593012 | 0          | 3 | 2 | 0.17593012 | 0.61140001 |
| chr19 | 31285146 | 31382941 | 97796  | 1 | 1 | 0 | 0.02438896 | 0          | 3 | 2 | 0.51676182 | 0.61140001 |
| chr19 | 31382941 | 31563597 | 180657 | 1 | 1 | 0 | 0.05404976 | 0          | 2 | 2 | 0.30102999 | 0.61140001 |
| chr19 | 31563597 | 31644321 | 80725  | 2 | 2 | 0 | 0.1575501  | 0          | 2 | 2 | 0.1575501  | 0.61140001 |
| chr19 | 31644321 | 31832800 | 188480 | 5 | 2 | 0 | 0.05404976 | 0          | 2 | 2 | 0.30102999 | 0.61140001 |
| chr19 | 31832800 | 31915028 | 82229  | 1 | 1 | 0 | 0.05404976 | 0          | 2 | 1 | 0.30102999 | 0.30102999 |
| chr19 | 31915028 | 31998757 | 83730  | 2 | 2 | 0 | 0.08289318 | 0          | 3 | 1 | 0.30102999 | 0.30102999 |
| chr19 | 31998757 | 31998816 | 60     | 1 | 3 | 0 | 0.17593012 | 0          | 3 | 1 | 0.17593012 | 0.30102999 |
| chr19 | 31998816 | 32171846 | 173031 | 1 | 2 | 0 | 0.08289318 | 0          | 3 | 0 | 0.30102999 | 0          |
| chr19 | 32171846 | 32434941 | 263096 | 3 | 3 | 0 | 0.17593012 | 0          | 3 | 0 | 0.17593012 | 0          |
| chr19 | 32434941 | 32527643 | 92703  | 2 | 4 | 0 | 0.30102999 | 0          | 3 | 1 | 0.10122019 | 0.30102999 |
| chr19 | 32527643 | 32732949 | 205307 | 2 | 4 | 0 | 0.18734596 | 0          | 4 | 1 | 0.18734596 | 0.30102999 |
| chr19 | 32732949 | 32899097 | 166149 | 6 | 5 | 0 | 0.19510895 | 0          | 5 | 1 | 0.19510895 | 0.30102999 |
| chr19 | 32899097 | 32976182 | 77086  | 3 | 6 | 0 | 0.30102999 | 0          | 5 | 1 | 0.12309572 | 0.30102999 |
| chr19 | 32976182 | 33131199 | 155018 | 4 | 6 | 0 | 0.20064824 | 0          | 6 | 1 | 0.20064824 | 0.30102999 |
| chr19 | 33131199 | 33165154 | 33956  | 3 | 6 | 1 | 0.08122616 | 0.1218695  | 8 | 1 | 0.4250187  | 0.1218695  |
| chr19 | 33165154 | 33199860 | 34707  | 1 | 6 | 1 | 0.129913   | 0.1218695  | 7 | 1 | 0.30102999 | 0.1218695  |
| chr19 | 33199860 | 33233814 | 33955  | 2 | 6 | 1 | 0.129913   | 0.05404976 | 7 | 2 | 0.30102999 | 0.30102999 |
| chr19 | 33233814 | 33233873 | 60     | 1 | 6 | 1 | 0.08122616 | 0.05404976 | 8 | 2 | 0.4250187  | 0.30102999 |
| chr19 | 33233873 | 33293412 | 59540  | 1 | 6 | 0 | 0.08122616 | 0          | 8 | 2 | 0.4250187  | 0.61140001 |
| chr19 | 33293412 | 33428562 | 135151 | 7 | 6 | 0 | 0.04875589 | 0          | 9 | 2 | 0.5732208  | 0.61140001 |
| chr19 | 33428562 | 33428621 | 60     | 1 | 6 | 1 | 0.04875589 | 0.01091641 | 9 | 4 | 0.5732208  | 0.76005302 |
| chr19 | 33428621 | 33523708 | 95088  | 4 | 6 | 1 | 0.08122616 | 0.05404976 | 8 | 2 | 0.4250187  | 0.30102999 |
| chr19 | 33523708 | 33523767 | 60     | 1 | 6 | 1 | 0.08122616 | 0.01091641 | 8 | 4 | 0.4250187  | 0.76005302 |
| chr19 | 33523767 | 33566487 | 42721  | 2 | 6 | 1 | 0.08122616 | 0.02438896 | 8 | 3 | 0.4250187  | 0.51676182 |
| chr19 | 33566487 | 33706253 | 139767 | 7 | 6 | 1 | 0.08122616 | 0.01091641 | 8 | 4 | 0.4250187  | 0.76005302 |
| chr19 | 33706253 | 33791093 | 84841  | 1 | 6 | 1 | 0.08122616 | 0.05404976 | 8 | 2 | 0.4250187  | 0.30102999 |
| chr19 | 33791093 | 33822223 | 31131  | 5 | 6 | 1 | 0.04875589 | 0.054      |   |   |            |            |

|       |          |          |        |    |    |   |            |            |   |   |            |            |
|-------|----------|----------|--------|----|----|---|------------|------------|---|---|------------|------------|
| chr19 | 35310550 | 35393688 | 83139  | 2  | 7  | 1 | 0.60763643 | 0.00478973 | 4 | 5 | 0.03812622 | 1.02643191 |
| chr19 | 35393688 | 35393747 | 60     | 1  | 7  | 1 | 0.30102999 | 0.00478973 | 6 | 5 | 0.129913   | 1.02643191 |
| chr19 | 35393747 | 35448179 | 54433  | 2  | 7  | 1 | 0.60763643 | 0.00478973 | 4 | 5 | 0.03812622 | 1.02643191 |
| chr19 | 35448179 | 35513296 | 65118  | 4  | 7  | 1 | 0.30102999 | 0.00478973 | 6 | 5 | 0.129913   | 1.02643191 |
| chr19 | 35513296 | 35522393 | 9098   | 1  | 7  | 1 | 0.43181735 | 0.00478973 | 5 | 5 | 0.07511598 | 1.02643191 |
| chr19 | 35522393 | 35522446 | 54     | 1  | 8  | 1 | 0.4250187  | 0.00478973 | 6 | 5 | 0.08122616 | 1.02643191 |
| chr19 | 35522446 | 35530049 | 7604   | 1  | 7  | 1 | 0.43181735 | 0.00478973 | 5 | 5 | 0.07511598 | 1.02643191 |
| chr19 | 35530049 | 35549635 | 19587  | 2  | 7  | 1 | 0.30102999 | 0.00478973 | 6 | 5 | 0.129913   | 1.02643191 |
| chr19 | 35549635 | 35608666 | 59032  | 1  | 7  | 1 | 0.43181735 | 0.00478973 | 5 | 5 | 0.07511598 | 1.02643191 |
| chr19 | 35608666 | 35610475 | 1810   | 2  | 10 | 1 | 0.56314362 | 0.00478973 | 7 | 5 | 0.05232577 | 1.02643191 |
| chr19 | 35610475 | 35619061 | 8587   | 1  | 10 | 1 | 0.74627054 | 0.00478973 | 6 | 5 | 0.02793176 | 1.02643191 |
| chr19 | 35619061 | 35646198 | 27138  | 4  | 10 | 1 | 0.74627054 | 0.00204627 | 6 | 6 | 0.02793176 | 1.31360226 |
| chr19 | 35646198 | 35658650 | 12453  | 2  | 10 | 1 | 0.56314362 | 0.00204627 | 7 | 6 | 0.05232577 | 1.31360226 |
| chr19 | 35658650 | 35718953 | 60304  | 2  | 10 | 1 | 0.56314362 | 0.00478973 | 7 | 5 | 0.05232577 | 1.02643191 |
| chr19 | 35718953 | 35750183 | 31231  | 1  | 9  | 1 | 0.42015402 | 0.00478973 | 7 | 5 | 0.08584816 | 1.02643191 |
| chr19 | 35750183 | 35750239 | 57     | 1  | 9  | 1 | 0.20975986 | 0.00478973 | 9 | 5 | 0.20975986 | 1.02643191 |
| chr19 | 35750239 | 35753740 | 3502   | 1  | 9  | 1 | 0.42015402 | 0.00478973 | 7 | 5 | 0.08584816 | 1.02643191 |
| chr19 | 35753740 | 35764908 | 11169  | 3  | 10 | 1 | 0.56314362 | 0.00478973 | 7 | 5 | 0.05232577 | 1.02643191 |
| chr19 | 35764908 | 35774128 | 9221   | 1  | 9  | 1 | 0.42015402 | 0.00478973 | 7 | 5 | 0.08584816 | 1.02643191 |
| chr19 | 35774128 | 35786362 | 12235  | 2  | 9  | 1 | 0.30102999 | 0.00478973 | 8 | 5 | 0.13872638 | 1.02643191 |
| chr19 | 35786362 | 35797163 | 10802  | 1  | 9  | 1 | 0.42015402 | 0.00478973 | 7 | 5 | 0.08584816 | 1.02643191 |
| chr19 | 35797163 | 35805758 | 8596   | 2  | 10 | 1 | 0.56314362 | 0.00478973 | 7 | 5 | 0.05232577 | 1.02643191 |
| chr19 | 35805758 | 35823435 | 17678  | 1  | 9  | 1 | 0.42015402 | 0.00478973 | 7 | 5 | 0.08584816 | 1.02643191 |
| chr19 | 35823435 | 35852205 | 28771  | 3  | 9  | 1 | 0.30102999 | 0.00204627 | 8 | 6 | 0.13872638 | 1.31360226 |
| chr19 | 35852205 | 35884867 | 32663  | 2  | 9  | 1 | 0.30102999 | 0.00478973 | 8 | 5 | 0.13872638 | 1.02643191 |
| chr19 | 35884867 | 35884926 | 60     | 1  | 9  | 1 | 0.30102999 | 0.00204627 | 8 | 6 | 0.13872638 | 1.31360226 |
| chr19 | 35884926 | 35888104 | 103179 | 2  | 9  | 1 | 0.42015402 | 0.00204627 | 7 | 6 | 0.08584816 | 1.31360226 |
| chr19 | 35888104 | 36037096 | 48993  | 4  | 9  | 1 | 0.30102999 | 0.00204627 | 8 | 6 | 0.13872638 | 1.31360226 |
| chr19 | 36037096 | 36045581 | 8486   | 1  | 9  | 1 | 0.30102999 | 0.00478973 | 8 | 5 | 0.13872638 | 1.02643191 |
| chr19 | 36045581 | 36079371 | 33791  | 1  | 9  | 1 | 0.42015402 | 0.00478973 | 7 | 5 | 0.08584816 | 1.02643191 |
| chr19 | 36079371 | 36122979 | 43609  | 1  | 8  | 1 | 0.30102999 | 0.00478973 | 7 | 5 | 0.13493666 | 1.02643191 |
| chr19 | 36122979 | 36229680 | 106702 | 5  | 7  | 1 | 0.20469099 | 0.00478973 | 7 | 5 | 0.20469099 | 1.02643191 |
| chr19 | 36229680 | 36230810 | 1131   | 2  | 7  | 1 | 0.20469099 | 0.00204627 | 7 | 6 | 0.20469099 | 1.31360226 |
| chr19 | 36230810 | 36276528 | 45719  | 4  | 6  | 1 | 0.129913   | 0.00478973 | 7 | 5 | 0.30102999 | 1.02643191 |
| chr19 | 36276528 | 36299154 | 22627  | 2  | 7  | 1 | 0.13493666 | 0.00478973 | 8 | 5 | 0.30102999 | 1.02643191 |
| chr19 | 36299154 | 36317150 | 17997  | 1  | 7  | 1 | 0.20469099 | 0.00478973 | 7 | 5 | 0.20469099 | 1.02643191 |
| chr19 | 36317150 | 36331936 | 14787  | 2  | 7  | 1 | 0.20469099 | 0.00204627 | 7 | 6 | 0.20469099 | 1.31360226 |
| chr19 | 36331936 | 36361210 | 29275  | 2  | 6  | 1 | 0.129913   | 0.00204627 | 7 | 6 | 0.30102999 | 1.31360226 |
| chr19 | 36361210 | 36389025 | 27816  | 3  | 7  | 1 | 0.13493666 | 0.00204627 | 8 | 6 | 0.30102999 | 1.31360226 |
| chr19 | 36389025 | 36513404 | 124380 | 9  | 7  | 1 | 0.30102999 | 0.00204627 | 6 | 6 | 0.129913   | 1.31360226 |
| chr19 | 36513404 | 36513461 | 58     | 1  | 7  | 1 | 0.20469099 | 0.00204627 | 7 | 6 | 0.20469099 | 1.31360226 |
| chr19 | 36513461 | 36561534 | 48074  | 2  | 6  | 1 | 0.20064824 | 0.00204627 | 6 | 6 | 0.20064824 | 1.31360226 |
| chr19 | 36561534 | 36639087 | 77554  | 7  | 6  | 1 | 0.129913   | 0.00204627 | 7 | 6 | 0.30102999 | 1.31360226 |
| chr19 | 36639087 | 36685508 | 46422  | 1  | 5  | 1 | 0.07511598 | 0.00204627 | 7 | 6 | 0.43181735 | 1.31360226 |
| chr19 | 36685508 | 36719631 | 34124  | 4  | 1  | 1 | 0.06713722 | 0.00204627 | 6 | 6 | 0.44141547 | 1.31360226 |
| chr19 | 36719631 | 37062929 | 343299 | 14 | 4  | 1 | 0.06713722 | 8.47E-04   | 6 | 7 | 0.44141547 | 1.62048027 |
| chr19 | 37062929 | 37062988 | 60     | 1  | 4  | 1 | 0.03812622 | 8.47E-04   | 7 | 7 | 0.60763643 | 1.62048027 |
| chr19 | 37062988 | 37111052 | 48065  | 2  | 4  | 1 | 0.06713722 | 8.47E-04   | 6 | 7 | 0.44141547 | 1.62048027 |
| chr19 | 37111052 | 37128749 | 17698  | 1  | 4  | 1 | 0.06713722 | 0.00204627 | 6 | 6 | 0.44141547 | 1.31360226 |
| chr19 | 37128749 | 37180416 | 51668  | 4  | 4  | 1 | 0.03812622 | 0.00204627 | 6 | 6 | 0.60763643 | 1.31360226 |
| chr19 | 37180416 | 37207072 | 26657  | 1  | 4  | 1 | 0.06713722 | 0.00204627 | 6 | 6 | 0.44141547 | 1.31360226 |
| chr19 | 37207072 | 37207131 | 60     | 1  | 4  | 1 | 0.06713722 | 8.47E-04   | 6 | 7 | 0.44141547 | 1.62048027 |
| chr19 | 37207131 | 37316210 | 109080 | 2  | 4  | 1 | 0.06713722 | 0.00204627 | 6 | 6 | 0.44141547 | 1.31360226 |
| chr19 | 37316210 | 37316269 | 60     | 1  | 4  | 1 | 0.03812622 | 0.00204627 | 6 | 6 | 0.60763643 | 1.31360226 |
| chr19 | 37316269 | 37360646 | 44378  | 2  | 4  | 1 | 0.06713722 | 0.00204627 | 6 | 6 | 0.44141547 | 1.31360226 |
| chr19 | 37360646 | 37488737 | 128092 | 2  | 4  | 1 | 0.06713722 | 0.00478973 | 6 | 5 | 0.44141547 | 1.02643191 |
| chr19 | 37488737 | 37571279 | 82543  | 2  | 4  | 1 | 0.06713722 | 0.01091641 | 6 | 4 | 0.44141547 | 0.76005302 |
| chr19 | 37571279 | 37835452 | 264174 | 7  | 4  | 1 | 0.06713722 | 0.02438896 | 6 | 3 | 0.44141547 | 0.51676182 |
| chr19 | 37835452 | 37965013 | 129562 | 2  | 4  | 1 | 0.11390366 | 0.02438896 | 5 | 3 | 0.30102999 | 0.51676182 |
| chr19 | 37965013 | 37965072 | 60     | 1  | 4  | 1 | 0.03812622 | 0.02438896 | 7 | 3 | 0.60763643 | 0.51676182 |
| chr19 | 37965072 | 38077547 | 112476 | 3  | 4  | 1 | 0.11390366 | 0.02438896 | 5 | 3 | 0.30102999 | 0.51676182 |
| chr19 | 38077547 | 38123712 | 46166  | 4  | 4  | 1 | 0.06713722 | 0.02438896 | 6 | 3 | 0.44141547 | 0.51676182 |
| chr19 | 38123712 | 38294890 | 171179 | 8  | 4  | 1 | 0.03812622 | 0.02438896 | 7 | 3 | 0.60763643 | 0.51676182 |
| chr19 | 38294890 | 38465461 | 170572 | 4  | 4  | 1 | 0.03812622 | 0.01091641 | 4 | 4 | 0.60763643 | 0.76005302 |
| chr19 | 38465461 | 38533191 | 67731  | 2  | 5  | 1 | 0.07511598 | 0.01091641 | 7 | 4 | 0.43181735 | 0.76005302 |
| chr19 | 38533191 | 38698805 | 166615 | 3  | 5  | 1 | 0.07511598 | 0.02438896 | 7 | 3 | 0.43181735 | 0.51676182 |
| chr19 | 38698805 | 38754330 | 55226  | 4  | 6  | 1 | 0.129913   | 0.02438896 | 6 | 7 | 0.30102999 | 0.51676182 |
| chr19 | 38754330 | 38860308 | 105979 | 5  | 5  | 1 | 0.12309572 | 0.02438896 | 6 | 3 | 0.30102999 | 0.51676182 |
| chr19 | 38860308 | 38871281 | 10974  | 2  | 5  | 1 | 0.07511598 | 0.02438896 | 7 | 3 | 0.43181735 | 0.51676182 |
| chr19 | 38871281 | 38902685 | 31405  | 2  | 5  | 1 | 0.12309572 | 0.02438896 | 6 | 3 | 0.30102999 | 0.51676182 |
| chr19 | 38902685 | 38927991 | 25207  | 1  | 4  | 1 | 0.06713722 | 0.02438896 | 6 | 3 | 0.44141547 | 0.51676182 |
| chr19 | 38927991 | 38950861 | 22871  | 2  | 4  | 1 | 0.03812622 | 0.02438896 | 7 | 3 | 0.60763643 | 0.51676182 |
| chr19 | 38950861 | 38994678 | 43818  | 1  | 4  | 1 | 0.06713722 | 0.02438896 | 6 | 3 | 0.44141547 | 0.51676182 |
| chr19 | 38994678 | 38994737 | 60     | 1  | 4  | 1 | 0.06713722 | 0.01091641 | 4 | 4 | 0.44141547 | 0.76005302 |
| chr19 | 38994737 | 39025966 | 31230  | 1  | 3  | 1 | 0.03070643 | 0.01091641 | 6 | 4 | 0.63695542 | 0.76005302 |
| chr19 | 39025966 | 39026018 | 53     | 1  | 3  | 1 | 0.03070643 | 0.00478973 | 6 | 5 | 0.63695542 | 1.02643191 |
| chr19 | 39026018 | 39101916 | 75899  | 2  | 3  | 1 | 0.05670724 | 0.00478973 | 5 | 5 | 0.45545077 | 1.02643191 |
| chr19 | 39101916 | 39148286 | 46371  | 4  | 3  | 1 | 0.03070643 | 0.00478973 | 6 | 5 | 0.63695542 | 1.02643191 |
| chr19 | 39148286 | 39185493 | 37208  | 2  | 3  | 1 | 0.05670724 | 0.01091641 | 5 | 4 | 0.45545077 | 0.76005302 |
| chr19 | 39185493 | 39228718 | 43226  | 2  | 3  | 1 | 0.10122019 | 0.01091641 | 4 | 4 | 0.30102999 | 0.76005302 |
| chr19 | 39228718 | 39275245 | 46528  | 2  | 3  | 1 | 0.10122019 | 0.00478973 | 4 | 5 | 0.30102999 | 1.02643191 |
| chr19 | 39275245 | 39311330 | 36086  | 3  | 3  | 1 | 0.10122019 | 0.00204627 | 4 | 6 | 0.30102999 | 1.31360226 |
| chr19 | 39311330 | 39376984 | 65655  | 3  | 3  | 1 | 0.10122019 | 0.00478973 | 4 | 5 | 0.30102999 | 1.02643191 |
| chr19 | 39376984 | 39450676 | 73693  | 7  | 3  | 1 | 0.10122019 | 0.00204627 | 4 | 6 | 0.30102999 | 1.31360226 |
| chr19 | 39450676 | 39548286 | 97611  | 2  | 2  | 1 | 0.0429175  | 0.00204627 | 4 | 6 | 0.47744371 | 1.31360226 |
| chr19 | 39548286 | 39622907 | 74622  | 2  | 3  | 1 | 0.10122019 | 0.00204627 | 4 | 6 | 0.30102999 | 1.31360226 |
| chr19 | 39622907 | 39788399 | 165493 | 6  | 2  | 1 | 0.0429175  | 0.00204627 | 4 | 6 | 0.47744371 | 1.31360226 |
| chr19 | 39788399 | 39879804 | 91406  | 4  | 2  | 1 | 0.08289318 | 0.00204627 | 3 | 6 | 0.30102999 | 1.31360226 |
| chr19 | 39879804 | 39911847 | 32044  | 2  | 2  | 1 | 0.1575501  | 0.00204627 | 2 | 6 | 0.1575501  | 1.31360226 |
| chr19 | 39911847 |          |        |    |    |   |            |            |   |   |            |            |

|       |          |          |        |    |    |   |             |            |   |   |             |            |
|-------|----------|----------|--------|----|----|---|-------------|------------|---|---|-------------|------------|
| chr19 | 41798143 | 41836496 | 38354  | 4  | 7  | 1 | 0.60763643  | 3.39E-04   | 4 | 8 | 0.03812622  | 1.94674965 |
| chr19 | 41836496 | 41880304 | 43809  | 3  | 7  | 1 | 0.84395715  | 3.39E-04   | 3 | 8 | 0.01598258  | 1.94674965 |
| chr19 | 41880304 | 41892840 | 12537  | 2  | 7  | 1 | 0.60763643  | 3.39E-04   | 4 | 8 | 0.03812622  | 1.94674965 |
| chr19 | 41892840 | 41930171 | 37332  | 1  | 7  | 1 | 0.84395715  | 3.39E-04   | 3 | 8 | 0.01598258  | 1.94674965 |
| chr19 | 41930171 | 41945396 | 15226  | 3  | 7  | 2 | 0.84395715  | 0.00221948 | 3 | 8 | 0.01598258  | 1.44210395 |
| chr19 | 41945396 | 41991439 | 46044  | 1  | 7  | 2 | 0.84395715  | 0.00493743 | 3 | 7 | 0.01598258  | 1.16581773 |
| chr19 | 41991439 | 41991498 | 60     | 1  | 7  | 2 | 0.60763643  | 0.00493743 | 4 | 7 | 0.03812622  | 1.16581773 |
| chr19 | 41991498 | 42207243 | 215746 | 4  | 6  | 2 | 0.44141547  | 0.00493743 | 4 | 7 | 0.06713722  | 1.16581773 |
| chr19 | 42207243 | 42225055 | 17813  | 1  | 6  | 2 | 0.63695542  | 0.00493743 | 3 | 7 | 0.03070643  | 1.16581773 |
| chr19 | 42225055 | 42289030 | 63976  | 2  | 4  | 2 | 0.47744371  | 0.00493743 | 2 | 7 | 0.0429175   | 1.16581773 |
| chr19 | 42289030 | 42382285 | 93256  | 5  | 3  | 2 | 0.30102999  | 0.00493743 | 2 | 7 | 0.08289318  | 1.16581773 |
| chr19 | 42382285 | 42382332 | 48     | 1  | 4  | 2 | 0.47744371  | 0.00493743 | 2 | 7 | 0.0429175   | 1.16581773 |
| chr19 | 42382332 | 42477198 | 94867  | 5  | 3  | 2 | 0.51676182  | 0.00493743 | 1 | 7 | 0.02438896  | 1.16581773 |
| chr19 | 42477198 | 42487224 | 10027  | 2  | 4  | 2 | 0.76005302  | 0.00493743 | 1 | 7 | 0.01091641  | 1.16581773 |
| chr19 | 42487224 | 42754032 | 266809 | 15 | 3  | 2 | 0.51676182  | 0.00493743 | 1 | 7 | 0.02438896  | 1.16581773 |
| chr19 | 42754032 | 42790756 | 36725  | 1  | 2  | 2 | 0.30102999  | 0.00493743 | 1 | 7 | 0.05404976  | 1.16581773 |
| chr19 | 42790756 | 42871199 | 80444  | 2  | 2  | 2 | 0.61140001  | 0.00493743 | 0 | 7 | 0.05404976  | 1.16581773 |
| chr19 | 42871199 | 42882861 | 11663  | 2  | 2  | 2 | 0.30102999  | 0.00493743 | 1 | 7 | 0.05404976  | 1.16581773 |
| chr19 | 42882861 | 42882918 | 58     | 1  | 3  | 2 | 0.51676182  | 0.00493743 | 1 | 7 | 0.02438896  | 1.16581773 |
| chr19 | 42882918 | 42912651 | 29734  | 2  | 2  | 2 | 0.30102999  | 0.00493743 | 1 | 7 | 0.05404976  | 1.16581773 |
| chr19 | 42912651 | 42930946 | 18296  | 2  | 4  | 2 | 0.76005302  | 0.00493743 | 1 | 7 | 0.01091641  | 1.16581773 |
| chr19 | 42930946 | 43024312 | 93367  | 2  | 2  | 2 | 0.30102999  | 0.00493743 | 1 | 7 | 0.05404976  | 1.16581773 |
| chr19 | 43024312 | 43196116 | 171805 | 4  | 2  | 2 | 0.30102999  | 0.01053319 | 1 | 6 | 0.05404976  | 0.91219088 |
| chr19 | 43196116 | 43514123 | 318008 | 1  | 1  | 2 | 0.30102999  | 0.01053319 | 0 | 6 | 0           | 0.91219088 |
| chr19 | 43514123 | 43514182 | 60     | 1  | 2  | 2 | 0.61140001  | 0.01053319 | 0 | 6 | 0           | 0.91219088 |
| chr19 | 43514182 | 43689982 | 175801 | 1  | 2  | 2 | 0.30102999  | 0.02162467 | 0 | 6 | 0           | 0.68214471 |
| chr19 | 43689982 | 43859668 | 169687 | 3  | 1  | 2 | 0.30102999  | 0.01053319 | 0 | 6 | 0           | 0.91219088 |
| chr19 | 43859668 | 44079106 | 219439 | 9  | 1  | 2 | 0.30102999  | 0.02162467 | 0 | 5 | 0           | 0.68214471 |
| chr19 | 44079106 | 44079154 | 49     | 1  | 2  | 2 | 0.30102999  | 0.00493743 | 0 | 7 | 0           | 1.16581773 |
| chr19 | 44079154 | 44135582 | 56429  | 3  | 1  | 2 | 0.30102999  | 0.01053319 | 0 | 6 | 0           | 0.91219088 |
| chr19 | 44135582 | 44169093 | 33512  | 3  | 1  | 2 | 0.30102999  | 0.02162467 | 0 | 5 | 0           | 0.68214471 |
| chr19 | 44169093 | 44279755 | 110663 | 5  | 1  | 2 | 0.30102999  | 0.0429175  | 0 | 4 | 0           | 0.47744371 |
| chr19 | 44279755 | 44279814 | 60     | 1  | 1  | 2 | 0.30102999  | 0.02162467 | 0 | 5 | 0           | 0.68214471 |
| chr19 | 44279814 | 44571837 | 292024 | 8  | 1  | 2 | 0.30102999  | 0.0429175  | 0 | 4 | 0           | 0.47744371 |
| chr19 | 44571837 | 44599647 | 27811  | 2  | 1  | 2 | 0.1218695   | 0.02162467 | 1 | 5 | 0.1218695   | 0.68214471 |
| chr19 | 44599647 | 44624732 | 25086  | 3  | 2  | 2 | 0.1575501   | 0.02162467 | 2 | 5 | 0.1575501   | 0.68214471 |
| chr19 | 44624732 | 44872439 | 247708 | 11 | 1  | 2 | 0.05404976  | 0.02162467 | 2 | 5 | 0.30102999  | 0.68214471 |
| chr19 | 44872439 | 44872498 | 60     | 1  | 1  | 2 | 0.05404976  | 0.01053319 | 2 | 6 | 0.30102999  | 0.91219088 |
| chr19 | 44872498 | 44931854 | 59357  | 1  | 1  | 2 | 0.1218695   | 0.01053319 | 1 | 6 | 0.1218695   | 0.91219088 |
| chr19 | 44931854 | 45003573 | 71720  | 2  | 1  | 2 | 0.1218695   | 0.02162467 | 1 | 5 | 0.1218695   | 0.68214471 |
| chr19 | 45003573 | 45072894 | 69322  | 2  | 1  | 2 | 0.1218695   | 0.01053319 | 1 | 6 | 0.1218695   | 0.91219088 |
| chr19 | 45072894 | 45072953 | 60     | 1  | 2  | 2 | 0.30102999  | 0.00221948 | 1 | 8 | 0.05404976  | 1.44210395 |
| chr19 | 45072953 | 45178124 | 105172 | 2  | 2  | 2 | 0.30102999  | 0.00493743 | 1 | 7 | 0.05404976  | 1.16581773 |
| chr19 | 45178124 | 45258255 | 80132  | 2  | 2  | 2 | 0.30102999  | 0.02162467 | 1 | 5 | 0.05404976  | 0.68214471 |
| chr19 | 45258255 | 45261891 | 3637   | 2  | 3  | 2 | 0.30102999  | 0.00493743 | 2 | 7 | 0.08289318  | 1.16581773 |
| chr19 | 45261891 | 45452460 | 190570 | 8  | 3  | 2 | 0.30102999  | 0.01053319 | 2 | 6 | 0.08289318  | 0.91219088 |
| chr19 | 45452460 | 45464235 | 11776  | 2  | 3  | 2 | 0.17593012  | 0.01053319 | 3 | 6 | 0.17593012  | 0.91219088 |
| chr19 | 45464235 | 45631367 | 167133 | 9  | 4  | 2 | 0.30102999  | 0.01053319 | 3 | 6 | 0.110122019 | 0.91219088 |
| chr19 | 45631367 | 45681759 | 50393  | 2  | 5  | 2 | 0.45545077  | 0.01053319 | 3 | 6 | 0.05670724  | 0.91219088 |
| chr19 | 45681759 | 45852503 | 170745 | 8  | 6  | 2 | 0.63695542  | 0.01053319 | 3 | 6 | 0.03070643  | 0.91219088 |
| chr19 | 45852503 | 45918241 | 65739  | 5  | 7  | 2 | 0.43181735  | 0.01053319 | 5 | 6 | 0.07511598  | 0.91219088 |
| chr19 | 45918241 | 46030194 | 111954 | 7  | 9  | 2 | 0.76806864  | 0.01053319 | 5 | 6 | 0.02473314  | 0.91219088 |
| chr19 | 46030194 | 46142158 | 111965 | 6  | 10 | 2 | 0.97390707  | 0.01053319 | 5 | 6 | 0.01320236  | 0.91219088 |
| chr19 | 46142158 | 46167763 | 25606  | 1  | 9  | 2 | 0.76806864  | 0.01053319 | 5 | 6 | 0.02473314  | 0.91219088 |
| chr19 | 46167763 | 46194691 | 26929  | 2  | 9  | 2 | 0.101542894 | 0.01053319 | 4 | 6 | 0.01077081  | 0.91219088 |
| chr19 | 46194691 | 46239294 | 44604  | 4  | 9  | 2 | 0.76806864  | 0.01053319 | 5 | 6 | 0.02473314  | 0.91219088 |
| chr19 | 46239294 | 46371360 | 132067 | 10 | 9  | 2 | 0.101542894 | 0.01053319 | 4 | 6 | 0.01077081  | 0.91219088 |
| chr19 | 46371360 | 46376450 | 5091   | 2  | 9  | 2 | 0.76806864  | 0.01053319 | 5 | 6 | 0.02473314  | 0.91219088 |
| chr19 | 46376450 | 46524574 | 148125 | 5  | 8  | 2 | 0.58747015  | 0.01053319 | 5 | 6 | 0.04407651  | 0.91219088 |
| chr19 | 46524574 | 46619573 | 95000  | 7  | 2  | 2 | 0.43181735  | 0.01053319 | 5 | 6 | 0.07511598  | 0.91219088 |
| chr19 | 46619573 | 46664337 | 44765  | 2  | 9  | 2 | 0.58747015  | 0.01053319 | 5 | 6 | 0.04407651  | 0.91219088 |
| chr19 | 46664337 | 46664396 | 60     | 1  | 9  | 2 | 0.76806864  | 0.01053319 | 5 | 6 | 0.02473314  | 0.91219088 |
| chr19 | 46664396 | 46803472 | 139077 | 2  | 5  | 2 | 0.30102999  | 0.01053319 | 4 | 6 | 0.11390336  | 0.91219088 |
| chr19 | 46803472 | 46803531 | 60     | 1  | 6  | 2 | 0.30102999  | 0.01053319 | 5 | 6 | 0.12309572  | 0.91219088 |
| chr19 | 46803531 | 46819766 | 16236  | 1  | 6  | 2 | 0.44141547  | 0.01053319 | 4 | 6 | 0.06713722  | 0.91219088 |
| chr19 | 46819766 | 46867709 | 47944  | 2  | 5  | 2 | 0.30102999  | 0.01053319 | 4 | 6 | 0.11390336  | 0.91219088 |
| chr19 | 46867709 | 46867768 | 60     | 1  | 6  | 2 | 0.30102999  | 0.01053319 | 5 | 6 | 0.12309572  | 0.91219088 |
| chr19 | 46867768 | 46894533 | 26766  | 1  | 6  | 2 | 0.63695542  | 0.01053319 | 3 | 6 | 0.03070643  | 0.91219088 |
| chr19 | 46894533 | 46914298 | 19766  | 1  | 5  | 2 | 0.45545077  | 0.01053319 | 3 | 6 | 0.05670724  | 0.91219088 |
| chr19 | 46914298 | 46961367 | 47070  | 2  | 5  | 2 | 0.30102999  | 0.01053319 | 4 | 6 | 0.11390336  | 0.91219088 |
| chr19 | 46961367 | 46971563 | 10197  | 2  | 6  | 2 | 0.30102999  | 0.01053319 | 5 | 6 | 0.12309572  | 0.91219088 |
| chr19 | 46971563 | 47016014 | 44452  | 1  | 5  | 2 | 0.30102999  | 0.01053319 | 4 | 6 | 0.11390336  | 0.91219088 |
| chr19 | 47016014 | 47092309 | 76296  | 1  | 5  | 2 | 0.102643191 | 0.01053319 | 1 | 6 | 0.00478973  | 0.91219088 |
| chr19 | 47092309 | 47167978 | 75670  | 6  | 5  | 2 | 0.102643191 | 0.00493743 | 1 | 7 | 0.00478973  | 1.16581773 |
| chr19 | 47167978 | 47168037 | 60     | 1  | 5  | 2 | 0.68214471  | 0.00493743 | 2 | 7 | 0.02162467  | 1.16581773 |
| chr19 | 47168037 | 47189406 | 21370  | 1  | 5  | 2 | 0.68214471  | 0.01053319 | 2 | 6 | 0.02162467  | 0.91219088 |
| chr19 | 47189406 | 47217254 | 27849  | 3  | 5  | 2 | 0.45545077  | 0.01053319 | 3 | 6 | 0.05670724  | 0.91219088 |
| chr19 | 47217254 | 47241454 | 24201  | 1  | 5  | 2 | 0.102643191 | 0.01053319 | 1 | 6 | 0.00478973  | 0.91219088 |
| chr19 | 47241454 | 47253444 | 11991  | 2  | 5  | 2 | 0.102643191 | 0.00493743 | 1 | 7 | 0.00478973  | 1.16581773 |
| chr19 | 47253444 | 47343480 | 90037  | 3  | 4  | 2 | 0.76005302  | 0.00493743 | 1 | 7 | 0.01091641  | 1.16581773 |
| chr19 | 47343480 | 47343539 | 60     | 1  | 5  | 2 | 0.102643191 | 0.00493743 | 1 | 7 | 0.00478973  | 1.16581773 |
| chr19 | 47343539 | 47441137 | 97599  | 2  | 3  | 2 | 0.51676182  | 0.00493743 | 1 | 7 | 0.02438896  | 1.16581773 |
| chr19 | 47441137 | 47441196 | 60     | 1  | 4  | 2 | 0.76005302  | 0.00493743 | 1 | 7 | 0.01091641  | 1.16581773 |
| chr19 | 47441196 | 47550482 | 109287 | 6  | 3  | 2 | 0.51676182  | 0.00493743 | 1 | 7 | 0.02438896  | 1.16581773 |
| chr19 | 47550482 | 47634783 | 84302  | 3  | 3  | 2 | 0.51676182  | 0.01598258 | 1 | 7 | 0.02438896  | 0.84395715 |
| chr19 | 47634783 | 47658342 | 23560  | 2  | 3  | 3 | 0.51676182  | 0.0079614  | 1 | 8 | 0.02438896  | 1.07548421 |
| chr19 | 47658342 | 47658389 | 48     | 1  | 4  | 3 | 0.47744371  | 0.0079614  | 2 | 8 | 0.0429175   | 1.07548421 |
| chr19 | 47658389 | 47713626 | 55238  | 3  | 4  | 3 | 0.47744371  | 0.01598258 | 2 | 7 | 0.0429175   | 0.84395715 |
| chr19 | 47713626 | 47726944 | 13319  | 2  | 3  | 3 | 0.51676182  | 0.01598258 | 1 | 7 | 0.02438896  | 0.84395715 |
| chr19 | 47726944 | 47728988 | 2045   | 2  | 5  | 3 | 0.68214471  | 0.01598258 | 2 | 7 | 0.021624    |            |

|       |          |          |        |    |   |   |            |            |   |    |            |            |
|-------|----------|----------|--------|----|---|---|------------|------------|---|----|------------|------------|
| chr19 | 49253227 | 49253284 | 58     | 1  | 2 | 4 | 0.30102999 | 0.01077081 | 1 | 9  | 0.05404976 | 1.01542894 |
| chr19 | 49253284 | 49308386 | 55103  | 2  | 2 | 3 | 0.30102999 | 0.00378107 | 1 | 9  | 0.05404976 | 1.33111237 |
| chr19 | 49308386 | 49308444 | 59     | 1  | 2 | 3 | 0.15755011 | 0.00378107 | 2 | 9  | 0.15755011 | 1.33111237 |
| chr19 | 49308444 | 49361277 | 52834  | 3  | 2 | 3 | 0.30102999 | 0.00378107 | 1 | 9  | 0.05404976 | 1.33111237 |
| chr19 | 49361277 | 49415642 | 54366  | 4  | 2 | 3 | 0.61140001 | 0.00378107 | 0 | 9  | 0          | 1.33111237 |
| chr19 | 49415642 | 49439537 | 23896  | 2  | 2 | 3 | 0.30102999 | 0.00170589 | 1 | 10 | 0.05404976 | 1.61091002 |
| chr19 | 49439537 | 49439588 | 52     | 1  | 3 | 3 | 0.51676182 | 0.00170589 | 1 | 10 | 0.02438896 | 1.61091002 |
| chr19 | 49439588 | 49485600 | 46013  | 5  | 3 | 3 | 0.51676182 | 0.00378107 | 1 | 9  | 0.02438896 | 1.33111237 |
| chr19 | 49485600 | 49485636 | 12937  | 2  | 3 | 3 | 0.51676182 | 0.00170589 | 1 | 10 | 0.02438896 | 1.61091002 |
| chr19 | 49485636 | 49511469 | 12934  | 2  | 3 | 3 | 0.51676182 | 0.00378107 | 1 | 9  | 0.02438896 | 1.33111237 |
| chr19 | 49511469 | 49562755 | 51287  | 1  | 3 | 3 | 0.93173516 | 0.00378107 | 0 | 9  | 0          | 1.33111237 |
| chr19 | 49562755 | 49562804 | 50     | 1  | 3 | 3 | 0.93173516 | 0.00170589 | 0 | 10 | 0          | 1.61091002 |
| chr19 | 49562804 | 49609499 | 46696  | 2  | 3 | 3 | 0.93173516 | 0.00378107 | 0 | 9  | 0          | 1.33111237 |
| chr19 | 49609499 | 49654798 | 45300  | 4  | 3 | 3 | 0.93173516 | 0.00170589 | 0 | 10 | 0          | 1.61091002 |
| chr19 | 49654798 | 49926268 | 271471 | 13 | 3 | 3 | 0.93173516 | 0.00378107 | 0 | 9  | 0          | 1.33111237 |
| chr19 | 49926268 | 50168439 | 242172 | 16 | 3 | 2 | 0.93173516 | 9.54E-04   | 0 | 9  | 0          | 1.74076927 |
| chr19 | 50168439 | 50186996 | 18558  | 2  | 4 | 2 | 1.26272838 | 9.54E-04   | 0 | 9  | 0          | 1.74076927 |
| chr19 | 50186996 | 50187055 | 60     | 1  | 4 | 2 | 0.76005302 | 9.54E-04   | 1 | 9  | 0.01091641 | 1.74076927 |
| chr19 | 50187055 | 50206317 | 19263  | 2  | 4 | 2 | 1.26272838 | 9.54E-04   | 0 | 9  | 0          | 1.74076927 |
| chr19 | 50206317 | 50250620 | 44304  | 3  | 2 | 2 | 0.93173516 | 9.54E-04   | 0 | 9  | 0          | 1.74076927 |
| chr19 | 50250620 | 50310150 | 59531  | 3  | 2 | 2 | 0.61140001 | 9.54E-04   | 0 | 9  | 0          | 1.74076927 |
| chr19 | 50310150 | 50310204 | 55     | 1  | 3 | 5 | 0.93173516 | 9.54E-04   | 0 | 9  | 0          | 1.74076927 |
| chr19 | 50310204 | 50332261 | 23058  | 2  | 2 | 2 | 0.61140001 | 9.54E-04   | 0 | 9  | 0          | 1.74076927 |
| chr19 | 50332261 | 50356474 | 23214  | 2  | 4 | 2 | 1.26272838 | 9.54E-04   | 0 | 9  | 0          | 1.74076927 |
| chr19 | 50356474 | 50491623 | 135150 | 11 | 2 | 2 | 0.61140001 | 9.54E-04   | 0 | 9  | 0          | 1.74076927 |
| chr19 | 50491623 | 50491673 | 51     | 1  | 2 | 2 | 0.61140001 | 3.90E-04   | 0 | 10 | 0          | 2.0620585  |
| chr19 | 50491673 | 50535632 | 43960  | 2  | 2 | 2 | 0.61140001 | 9.54E-04   | 0 | 9  | 0          | 1.74076927 |
| chr19 | 50535632 | 50655777 | 120146 | 1  | 1 | 2 | 0.30102999 | 9.54E-04   | 0 | 9  | 0          | 1.74076927 |
| chr19 | 50655777 | 50714322 | 58546  | 3  | 2 | 2 | 0.61140001 | 9.54E-04   | 0 | 9  | 0          | 1.74076927 |
| chr19 | 50714322 | 50728418 | 14097  | 2  | 5 | 2 | 1.60515106 | 9.54E-04   | 0 | 9  | 0          | 1.74076927 |
| chr19 | 50728418 | 50857865 | 129448 | 3  | 4 | 2 | 1.26272838 | 9.54E-04   | 0 | 9  | 0          | 1.74076927 |
| chr19 | 50857865 | 50908837 | 50973  | 1  | 2 | 2 | 0.93173516 | 9.54E-04   | 0 | 9  | 0          | 1.74076927 |
| chr19 | 50908837 | 50908896 | 60     | 1  | 3 | 3 | 0.93173516 | 7.28E-04   | 0 | 11 | 0          | 1.91540774 |
| chr19 | 50908896 | 50916164 | 7269   | 1  | 3 | 3 | 0.93173516 | 0.00378107 | 0 | 9  | 0          | 1.33111237 |
| chr19 | 50916164 | 50928594 | 12431  | 3  | 3 | 3 | 0.93173516 | 0.00170589 | 0 | 10 | 0          | 1.61091002 |
| chr19 | 50928594 | 50928653 | 60     | 1  | 4 | 3 | 1.26272838 | 0.00170589 | 0 | 10 | 0          | 1.61091002 |
| chr19 | 50928653 | 50964849 | 36197  | 2  | 3 | 3 | 0.93173516 | 0.00378107 | 0 | 9  | 0          | 1.33111237 |
| chr19 | 50964849 | 50978879 | 14031  | 2  | 4 | 3 | 1.26272838 | 0.00170589 | 0 | 10 | 0          | 1.61091002 |
| chr19 | 50978879 | 51012074 | 33196  | 2  | 3 | 3 | 0.93173516 | 0.00170589 | 0 | 10 | 0          | 1.61091002 |
| chr19 | 51012074 | 51038896 | 26823  | 2  | 3 | 3 | 0.93173516 | 7.28E-04   | 0 | 11 | 0          | 1.91540774 |
| chr19 | 51038896 | 51084302 | 45407  | 1  | 2 | 3 | 0.61140001 | 7.28E-04   | 0 | 11 | 0          | 1.91540774 |
| chr19 | 51084302 | 51137228 | 52927  | 1  | 3 | 3 | 0.30102999 | 7.28E-04   | 0 | 11 | 0          | 1.91540774 |
| chr19 | 51137228 | 51153559 | 16332  | 2  | 1 | 3 | 0.30102999 | 2.93E-04   | 0 | 12 | 0          | 2.24559516 |
| chr19 | 51153559 | 51167468 | 13910  | 2  | 1 | 4 | 0.30102999 | 0.00108487 | 0 | 12 | 0          | 1.81706455 |
| chr19 | 51167468 | 51167527 | 60     | 1  | 5 | 0 | 0.30102999 | 0.00141024 | 0 | 13 | 0          | 1.7506523  |
| chr19 | 51167527 | 51186054 | 18528  | 1  | 1 | 4 | 0.30102999 | 0.00108487 | 0 | 12 | 0          | 1.81706455 |
| chr19 | 51186054 | 51226985 | 40932  | 2  | 1 | 4 | 0.30102999 | 0.00247414 | 0 | 11 | 0          | 1.52371709 |
| chr19 | 51226985 | 51227034 | 50     | 1  | 2 | 4 | 0.61140001 | 0.00108487 | 0 | 12 | 0          | 1.81706455 |
| chr19 | 51227034 | 51377036 | 150003 | 5  | 1 | 4 | 0.30102999 | 0.00108487 | 0 | 12 | 0          | 1.81706455 |
| chr19 | 51377036 | 51377086 | 51     | 1  | 1 | 4 | 0.1218695  | 0.00108487 | 1 | 12 | 0.1218695  | 1.81706455 |
| chr19 | 51377086 | 51454386 | 77301  | 4  | 1 | 4 | 0.30102999 | 0.00108487 | 0 | 12 | 0          | 1.81706455 |
| chr19 | 51454386 | 51454441 | 56     | 1  | 1 | 5 | 0.30102999 | 0.00317045 | 0 | 12 | 0          | 1.46403142 |
| chr19 | 51454441 | 51650878 | 196438 | 14 | 0 | 4 | 0          | 0.00108487 | 0 | 12 | 0          | 1.81706455 |
| chr19 | 51650878 | 51729565 | 78688  | 1  | 0 | 4 | 0          | 0.00247414 | 0 | 11 | 0          | 1.52371709 |
| chr19 | 51729565 | 51729610 | 46     | 1  | 0 | 4 | 0          | 0.00108487 | 0 | 12 | 0          | 1.81706455 |
| chr19 | 51729610 | 51772099 | 42490  | 2  | 0 | 4 | 0          | 0.00247414 | 0 | 11 | 0          | 1.52371709 |
| chr19 | 51772099 | 51834801 | 62703  | 1  | 0 | 4 | 0          | 0.00530919 | 0 | 10 | 0          | 1.2568129  |
| chr19 | 51834801 | 51870742 | 35942  | 3  | 0 | 4 | 0          | 0.00530919 | 1 | 10 | 0.30102999 | 1.2568129  |
| chr19 | 51870742 | 51890178 | 19437  | 4  | 0 | 5 | 0          | 0.01320236 | 1 | 10 | 0.30102999 | 0.97390707 |
| chr19 | 51890178 | 51914320 | 24143  | 1  | 0 | 4 | 0          | 0.00530919 | 1 | 10 | 0.30102999 | 1.2568129  |
| chr19 | 51914320 | 51954712 | 40393  | 1  | 0 | 4 | 0          | 0.00530919 | 0 | 10 | 0          | 1.2568129  |
| chr19 | 51954712 | 51954771 | 60     | 1  | 0 | 5 | 0          | 0.00141024 | 0 | 13 | 0          | 1.7506523  |
| chr19 | 51954771 | 51995246 | 40476  | 2  | 0 | 5 | 0          | 0.00317045 | 0 | 12 | 0          | 1.46403142 |
| chr19 | 51995246 | 52024592 | 29347  | 1  | 0 | 5 | 0          | 0.00666883 | 0 | 11 | 0          | 2.20557689 |
| chr19 | 52024592 | 52076789 | 52198  | 2  | 0 | 5 | 0          | 0.01320236 | 0 | 10 | 0          | 0.97390707 |
| chr19 | 52076789 | 52078911 | 2123   | 2  | 0 | 5 | 0          | 0.00666883 | 0 | 11 | 0          | 2.20557689 |
| chr19 | 52078911 | 52092146 | 13236  | 1  | 0 | 5 | 0          | 0.01320236 | 0 | 10 | 0          | 0.97390707 |
| chr19 | 52092146 | 52124973 | 32828  | 1  | 0 | 5 | 0          | 0.02473314 | 0 | 9  | 0          | 0.76806864 |
| chr19 | 52124973 | 52125032 | 60     | 1  | 0 | 5 | 0          | 0.01320236 | 0 | 10 | 0          | 0.97390707 |
| chr19 | 52125032 | 52368797 | 243766 | 9  | 0 | 5 | 0          | 0.04407651 | 0 | 8  | 0          | 0.58747015 |
| chr19 | 52368797 | 52368856 | 60     | 1  | 0 | 5 | 0          | 0.04407651 | 2 | 8  | 0.61140001 | 0.58747015 |
| chr19 | 52368856 | 52448801 | 79946  | 4  | 0 | 5 | 0          | 0.04407651 | 1 | 8  | 0.30102999 | 0.58747015 |
| chr19 | 52448801 | 52472123 | 23233  | 3  | 0 | 5 | 0          | 0.04407651 | 2 | 8  | 0.61140001 | 0.58747015 |
| chr19 | 52472123 | 52648635 | 176513 | 5  | 0 | 4 | 0          | 0.02074938 | 2 | 8  | 0.61140001 | 0.79906872 |
| chr19 | 52648635 | 52759496 | 110862 | 4  | 0 | 3 | 0          | 0.00796414 | 2 | 8  | 0.61140001 | 1.07548421 |
| chr19 | 52759496 | 52784840 | 25345  | 1  | 0 | 3 | 0          | 0.01598258 | 1 | 7  | 0.30102999 | 0.84395715 |
| chr19 | 52784840 | 52801918 | 17079  | 2  | 0 | 3 | 0          | 0.00796414 | 1 | 8  | 0.30102999 | 1.07548421 |
| chr19 | 52801918 | 52870242 | 68325  | 4  | 0 | 3 | 0          | 0.00378107 | 2 | 9  | 0.61140001 | 1.33111237 |
| chr19 | 52870242 | 52949327 | 79086  | 2  | 0 | 3 | 0          | 0.00796414 | 1 | 8  | 0.30102999 | 1.07548421 |
| chr19 | 52949327 | 52949386 | 60     | 1  | 0 | 3 | 0          | 0.00796414 | 2 | 8  | 0.61140001 | 1.07548421 |
| chr19 | 52949386 | 53015409 | 66024  | 2  | 0 | 3 | 0          | 0.00796414 | 1 | 8  | 0.30102999 | 1.07548421 |
| chr19 | 53015409 | 53092298 | 76890  | 2  | 0 | 3 | 0          | 0.01598258 | 0 | 7  | 0          | 0.84395715 |
| chr19 | 53092298 | 53181823 | 89526  | 3  | 1 | 3 | 0.1218695  | 0.01598258 | 1 | 7  | 0.1218695  | 0.84395715 |
| chr19 | 53181823 | 53181882 | 60     | 1  | 1 | 3 | 0.05404976 | 0.00796414 | 2 | 8  | 0.30102999 | 1.07548421 |
| chr19 | 53181882 | 53292606 | 110725 | 3  | 1 | 3 | 0.1218695  | 0.00796414 | 1 | 8  | 0.1218695  | 1.07548421 |
| chr19 | 53292606 | 53280401 | 35436  | 2  | 2 | 3 | 0.30102999 | 0.00796414 | 1 | 8  | 0.05404976 | 1.07548421 |
| chr19 | 53280401 | 53386659 | 58619  | 2  | 2 | 3 | 0.0429175  | 0.00796414 | 4 | 8  | 0.47744371 | 1.07548421 |
| chr19 | 53386659 | 53432969 | 46311  | 2  | 2 | 4 | 0.0429175  | 0.02074938 | 4 | 8  | 0.47744371 | 0.79906872 |
| chr19 | 53432969 | 53433028 | 60     | 1  | 2 | 4 | 0.0162467  | 0.02074938 | 5 | 8  | 0.68214471 | 0.79906872 |
| chr19 | 53433028 | 53472172 | 39145  | 2  | 2 | 3 | 0.02162467 | 0.00796414 | 5 | 8  | 0.68214471 | 1.07548421 |
| chr19 | 53472172 | 53569529 | 97358  | 2  | 2 | 3 | 0.0429175  | 0.00796414 | 4 | 8  | 0.47744371 | 1.07548421 |
| chr19 | 53569529 | 53580177 | 10649  | 2  | 4 | 4 | 0.11390336 | 0.02074938 | 5 | 8  | 0.30102999 | 0.79906872 |
| chr19 | 53580177 | 53617810 | 37634  | 1  | 4 | 3 | 0.11390336 | 0.00796414 | 5 | 8  | 0.30102999 | 1.07548421 |
| chr19 | 53617810 | 53656381 | 38572  | 3  | 4 | 3 | 0.47744371 | 0.00796414 | 2 | 8  | 0.0429175  | 1.07548421 |
| chr19 | 53656381 | 53762584 | 106204 | 5  | 2 | 3 | 0.30102999 | 0.00796414 | 1 | 8  | 0.05404976 | 1.075484   |

|       |          |          |        |    |   |   |            |            |   |    |            |            |
|-------|----------|----------|--------|----|---|---|------------|------------|---|----|------------|------------|
| chr19 | 55708726 | 55738404 | 29679  | 2  | 6 | 4 | 0.91219088 | 0.01077081 | 2 | 9  | 0.01053319 | 1.01542894 |
| chr19 | 55738404 | 55756096 | 17693  | 1  | 5 | 4 | 0.68214471 | 0.01077081 | 2 | 9  | 0.02162467 | 1.01542894 |
| chr19 | 55756096 | 55816867 | 60772  | 3  | 5 | 4 | 1.02643191 | 0.02074938 | 1 | 8  | 0.00478973 | 0.79906872 |
| chr19 | 55816867 | 55841353 | 24487  | 1  | 5 | 4 | 1.02643191 | 0.01077081 | 1 | 9  | 0.00478973 | 1.01542894 |
| chr19 | 55841353 | 55852485 | 11133  | 2  | 5 | 4 | 1.02643191 | 0.02074938 | 1 | 8  | 0.00478973 | 0.79906872 |
| chr19 | 55852485 | 55877018 | 24534  | 2  | 6 | 4 | 1.31360226 | 0.02074938 | 1 | 8  | 0.00204627 | 0.79906872 |
| chr19 | 55877018 | 55888391 | 11374  | 5  | 6 | 4 | 0.91219088 | 0.02074938 | 2 | 8  | 0.01053319 | 0.79906872 |
| chr19 | 55888391 | 55926498 | 38108  | 3  | 4 | 4 | 0.76005302 | 0.02074938 | 1 | 8  | 0.01091641 | 0.79906872 |
| chr19 | 55926498 | 55926557 | 60     | 1  | 4 | 4 | 0.47744371 | 0.02074938 | 2 | 8  | 0.0429175  | 0.79906872 |
| chr19 | 55926557 | 55966279 | 39723  | 1  | 4 | 4 | 0.76005302 | 0.02074938 | 1 | 8  | 0.01091641 | 0.79906872 |
| chr19 | 55966279 | 55966326 | 48     | 1  | 5 | 4 | 1.02643191 | 0.02074938 | 1 | 8  | 0.00478973 | 0.79906872 |
| chr19 | 55966326 | 56220371 | 254046 | 12 | 4 | 4 | 0.76005302 | 0.02074938 | 1 | 8  | 0.01091641 | 0.79906872 |
| chr19 | 56220371 | 56220428 | 58     | 1  | 4 | 4 | 0.76005302 | 0.01077081 | 1 | 9  | 0.01091641 | 1.01542894 |
| chr19 | 56220428 | 56228225 | 7798   | 1  | 4 | 4 | 0.76005302 | 0.02074938 | 1 | 8  | 0.01091641 | 0.79906872 |
| chr19 | 56228225 | 56249744 | 21520  | 3  | 4 | 4 | 0.47744371 | 0.02074938 | 2 | 8  | 0.0429175  | 0.79906872 |
| chr19 | 56249744 | 56290087 | 40344  | 1  | 4 | 4 | 0.76005302 | 0.02074938 | 1 | 8  | 0.01091641 | 0.79906872 |
| chr19 | 56290087 | 56320223 | 30137  | 3  | 4 | 4 | 0.76005302 | 0.01077081 | 1 | 9  | 0.01091641 | 1.01542894 |
| chr19 | 56320223 | 56320282 | 60     | 1  | 4 | 4 | 0.47744371 | 0.00530919 | 2 | 10 | 0.0429175  | 1.2568129  |
| chr19 | 56320282 | 56568115 | 247834 | 13 | 4 | 4 | 0.76005302 | 0.00530919 | 1 | 10 | 0.01091641 | 1.2568129  |
| chr19 | 56568115 | 56775004 | 206990 | 7  | 4 | 4 | 0.76005302 | 0.00247414 | 1 | 11 | 0.01091641 | 1.52371709 |
| chr19 | 56775004 | 56918488 | 143485 | 5  | 4 | 4 | 0.76005302 | 0.00108487 | 1 | 12 | 0.01091641 | 1.81706455 |
| chr19 | 56918488 | 57052082 | 143595 | 6  | 2 | 4 | 0.30102999 | 0.00108487 | 1 | 12 | 0.05404976 | 1.81706455 |
| chr19 | 57052082 | 57108697 | 46616  | 2  | 3 | 3 | 0.30102999 | 7.28E-04   | 1 | 11 | 0.05404976 | 1.91540774 |
| chr19 | 57108697 | 57108756 | 60     | 1  | 2 | 3 | 0.30102999 | 2.93E-04   | 1 | 12 | 0.05404976 | 2.24559516 |
| chr19 | 57108756 | 57188156 | 79401  | 4  | 2 | 3 | 0.30102999 | 7.28E-04   | 1 | 11 | 0.05404976 | 1.91540774 |
| chr19 | 57188156 | 57333807 | 145652 | 7  | 3 | 3 | 0.30102999 | 2.93E-04   | 1 | 12 | 0.05404976 | 2.24559516 |
| chr19 | 57333807 | 57430264 | 96458  | 3  | 2 | 3 | 0.30102999 | 7.28E-04   | 1 | 11 | 0.05404976 | 1.91540774 |
| chr19 | 57430264 | 57496160 | 65897  | 1  | 1 | 3 | 0.1218695  | 7.28E-04   | 1 | 11 | 0.1218695  | 1.91540774 |
| chr19 | 57496160 | 57650111 | 153952 | 4  | 1 | 3 | 0.1218695  | 2.93E-04   | 1 | 12 | 0.1218695  | 2.24559516 |
| chr19 | 57650111 | 57762080 | 111970 | 4  | 1 | 3 | 0.1218695  | 7.28E-04   | 1 | 11 | 0.1218695  | 1.91540774 |
| chr19 | 57762080 | 57890890 | 128811 | 4  | 1 | 3 | 0.1218695  | 2.93E-04   | 1 | 12 | 0.1218695  | 2.24559516 |
| chr19 | 57890890 | 57890949 | 60     | 1  | 1 | 4 | 0.1218695  | 0.00108487 | 1 | 12 | 0.1218695  | 1.81706455 |
| chr19 | 57890949 | 57909938 | 18990  | 1  | 1 | 3 | 0.1218695  | 2.93E-04   | 1 | 12 | 0.1218695  | 2.24559516 |
| chr19 | 57909938 | 57909992 | 55     | 1  | 4 | 4 | 0.1218695  | 0.00108487 | 1 | 12 | 0.1218695  | 1.81706455 |
| chr19 | 57909992 | 57966949 | 56958  | 2  | 1 | 3 | 0.1218695  | 2.93E-04   | 1 | 12 | 0.1218695  | 2.24559516 |
| chr19 | 57966949 | 58039812 | 72864  | 4  | 1 | 5 | 0.1218695  | 0.00317045 | 1 | 12 | 0.1218695  | 1.46403142 |
| chr19 | 58039812 | 58084555 | 44744  | 4  | 1 | 6 | 0.1218695  | 0.00778066 | 1 | 12 | 0.1218695  | 1.17038931 |
| chr19 | 58084555 | 58088623 | 4069   | 2  | 1 | 7 | 0.1218695  | 0.00859896 | 1 | 13 | 0.1218695  | 1.14735594 |
| chr19 | 58088623 | 58351811 | 263189 | 15 | 1 | 6 | 0.1218695  | 0.00373523 | 1 | 13 | 0.1218695  | 1.42397267 |
| chr19 | 58351811 | 58627174 | 275364 | 15 | 1 | 6 | 0.1218695  | 0.00778066 | 1 | 12 | 0.1218695  | 1.17038931 |
| chr19 | 58627174 | 58758099 | 130926 | 6  | 1 | 4 | 0.1218695  | 0.00247414 | 1 | 11 | 0.1218695  | 1.52371709 |
| chr19 | 58758099 | 58847845 | 89747  | 4  | 1 | 4 | 0.1218695  | 0.00530919 | 1 | 10 | 0.1218695  | 1.2568129  |
| chr19 | 58847845 | 58900941 | 53097  | 5  | 1 | 4 | 0.1218695  | 0.00247414 | 1 | 11 | 0.1218695  | 1.52371709 |
| chr19 | 58900941 | 58962275 | 61335  | 4  | 1 | 4 | 0.1218695  | 0.00530919 | 1 | 10 | 0.1218695  | 1.2568129  |
| chr19 | 58962275 | 58984792 | 22518  | 2  | 1 | 4 | 0.1218695  | 0.01077081 | 1 | 9  | 0.1218695  | 1.01542894 |
| chr19 | 58984792 | 59077872 | 93081  | 7  | 1 | 4 | 0.1218695  | 0.02074938 | 1 | 8  | 0.1218695  | 0.79906872 |
| chr19 | 59077872 | 59083573 | 5702   | 2  | 1 | 4 | 0.1218695  | 0.01077081 | 1 | 9  | 0.1218695  | 1.01542894 |
| chr19 | 59083573 | 59092570 | 8998   | 1  | 1 | 4 | 0.1218695  | 0.02074938 | 1 | 8  | 0.1218695  | 0.79906872 |
| chr20 | 121521   | 373123   | 251603 | 6  | 1 | 1 | 0.1218695  | 0.05404976 | 1 | 2  | 0.1218695  | 0.30102999 |
| chr20 | 373123   | 557845   | 184723 | 4  | 2 | 1 | 0.30102999 | 0.01091641 | 1 | 4  | 0.05404976 | 0.76005302 |
| chr20 | 557845   | 635056   | 77212  | 1  | 1 | 1 | 0.1218695  | 0.01091641 | 1 | 4  | 0.1218695  | 0.76005302 |
| chr20 | 635056   | 682953   | 47898  | 2  | 1 | 1 | 0.1218695  | 0.00478973 | 1 | 5  | 0.1218695  | 1.02643191 |
| chr20 | 682953   | 683012   | 60     | 1  | 2 | 1 | 0.30102999 | 8.47E-04   | 1 | 7  | 0.05404976 | 1.62048027 |
| chr20 | 683012   | 939015   | 256004 | 4  | 2 | 1 | 0.30102999 | 0.00204627 | 1 | 6  | 0.05404976 | 1.31360226 |
| chr20 | 939015   | 1108098  | 169084 | 4  | 2 | 1 | 0.30102999 | 8.47E-04   | 1 | 7  | 0.05404976 | 1.62048027 |
| chr20 | 1108098  | 1263324  | 155227 | 6  | 2 | 1 | 0.30102999 | 0.00204627 | 1 | 6  | 0.05404976 | 1.31360226 |
| chr20 | 1263324  | 1263383  | 60     | 1  | 2 | 1 | 0.1575501  | 8.47E-04   | 2 | 7  | 0.1575501  | 1.62048027 |
| chr20 | 1263383  | 1317516  | 54134  | 2  | 2 | 1 | 0.30102999 | 0.00204627 | 6 | 6  | 0.05404976 | 1.31360226 |
| chr20 | 1317516  | 1360233  | 42718  | 2  | 3 | 1 | 0.51676182 | 0.00204627 | 6 | 6  | 0.02438896 | 1.31360226 |
| chr20 | 1360233  | 1532476  | 172244 | 4  | 2 | 1 | 0.30102999 | 0.00204627 | 6 | 6  | 0.05404976 | 1.31360226 |
| chr20 | 1532476  | 1580899  | 48424  | 2  | 2 | 1 | 0.1575501  | 3.39E-04   | 2 | 8  | 0.1575501  | 1.94674965 |
| chr20 | 1580899  | 1580958  | 60     | 1  | 2 | 2 | 0.1575501  | 0.00221948 | 2 | 8  | 0.1575501  | 1.44210395 |
| chr20 | 1580958  | 1609843  | 28886  | 2  | 2 | 2 | 0.1575501  | 0.00493773 | 7 | 7  | 0.1575501  | 1.16581773 |
| chr20 | 1609843  | 1638047  | 28205  | 1  | 2 | 1 | 0.1575501  | 8.47E-04   | 2 | 7  | 0.1575501  | 1.62048027 |
| chr20 | 1638047  | 1721983  | 89337  | 3  | 2 | 2 | 0.1575501  | 0.00493773 | 7 | 7  | 0.1575501  | 1.16581773 |
| chr20 | 1721983  | 1751154  | 29172  | 2  | 3 | 2 | 0.30102999 | 0.00828918 | 2 | 7  | 0.0828918  | 0.84395715 |
| chr20 | 1751154  | 1751213  | 60     | 1  | 3 | 3 | 0.30102999 | 0.00796114 | 2 | 8  | 0.0828918  | 0.84395715 |
| chr20 | 1751213  | 1833123  | 81911  | 1  | 3 | 3 | 0.30102999 | 0.01598258 | 2 | 7  | 0.0828918  | 0.84395715 |
| chr20 | 1833123  | 1864506  | 31384  | 1  | 3 | 3 | 0.30102999 | 0.03070643 | 2 | 6  | 0.0828918  | 0.84395715 |
| chr20 | 1864506  | 1966650  | 102145 | 2  | 2 | 2 | 0.30102999 | 0.02162467 | 2 | 5  | 0.0828918  | 0.68214471 |
| chr20 | 1966650  | 2085908  | 119259 | 3  | 2 | 2 | 0.30102999 | 0.1053319  | 2 | 6  | 0.0828918  | 0.91219088 |
| chr20 | 2085908  | 2231311  | 145404 | 2  | 2 | 2 | 0.30102999 | 0.02162467 | 2 | 5  | 0.0828918  | 0.68214471 |
| chr20 | 2231311  | 2231370  | 60     | 1  | 3 | 3 | 0.30102999 | 0.05670724 | 2 | 5  | 0.0828918  | 0.45545077 |
| chr20 | 2231370  | 2369442  | 138073 | 2  | 3 | 2 | 0.51676182 | 0.02162467 | 1 | 5  | 0.02438896 | 0.68214471 |
| chr20 | 2369442  | 2369501  | 60     | 1  | 2 | 2 | 0.30102999 | 0.02162467 | 2 | 5  | 0.0828918  | 0.68214471 |
| chr20 | 2369501  | 2560637  | 191137 | 7  | 2 | 2 | 0.1575501  | 0.02162467 | 2 | 5  | 0.1575501  | 0.68214471 |
| chr20 | 2560637  | 2638034  | 77398  | 3  | 2 | 2 | 0.30102999 | 0.02162467 | 2 | 5  | 0.0828918  | 0.68214471 |
| chr20 | 2638034  | 2795770  | 157737 | 4  | 3 | 1 | 0.51676182 | 0.00478973 | 1 | 5  | 0.02438896 | 1.02643191 |
| chr20 | 2795770  | 2818694  | 22925  | 3  | 1 | 3 | 0.30102999 | 0.00478973 | 2 | 5  | 0.0828918  | 1.02643191 |
| chr20 | 2818694  | 2903953  | 85260  | 2  | 3 | 1 | 0.51676182 | 0.00478973 | 1 | 5  | 0.02438896 | 1.02643191 |
| chr20 | 2903953  | 2945513  | 41561  | 1  | 2 | 1 | 0.30102999 | 0.00478973 | 1 | 5  | 0.05404976 | 1.02643191 |
| chr20 | 2945513  | 2945572  | 60     | 1  | 3 | 1 | 0.30102999 | 0.00478973 | 2 | 5  | 0.0828918  | 1.02643191 |
| chr20 | 2945572  | 2985760  | 40189  | 2  | 3 | 1 | 0.1575501  | 0.00478973 | 2 | 5  | 0.1575501  | 1.02643191 |
| chr20 | 2985760  | 2985819  | 60     | 1  | 3 | 1 | 0.30102999 | 0.00478973 | 2 | 5  | 0.0828918  | 1.02643191 |
| chr20 | 2985819  | 3151593  | 165775 | 8  | 2 | 1 | 0.1575501  | 0.00478973 | 2 | 5  | 0.1575501  | 1.02643191 |
| chr20 | 3151593  | 3151652  | 60     | 1  | 2 | 1 | 0.1575501  | 0.00204627 | 2 | 6  | 0.1575501  | 1.31360226 |
| chr20 | 3151652  | 3195918  | 44267  | 2  | 2 | 1 | 0.30102999 | 0.00478973 | 1 | 5  | 0.05404976 | 1.02643191 |
| chr20 | 3195918  | 3208172  | 12255  | 2  | 2 | 1 | 0.1575501  | 0.00478973 | 1 | 5  | 0.1575501  | 1.02643191 |
| chr20 | 3208172  | 3284167  | 75996  | 1  | 2 | 1 | 0.30102999 | 0.00478973 | 2 | 5  | 0.05404976 | 1.02643191 |
| chr20 | 3284167  | 3417855  | 133689 | 3  | 2 | 1 | 0.0828918  | 0.00478973 | 3 | 5  | 0.30102999 | 1.02643191 |
| chr20 | 3417855  | 3417914  | 60     | 1  | 3 |   |            |            |   |    |            |            |

|       |          |          |        |    |   |   |            |            |   |   |            |            |
|-------|----------|----------|--------|----|---|---|------------|------------|---|---|------------|------------|
| chr20 | 6769229  | 7103757  | 334529 | 2  | 1 | 1 | 0.1218695  | 0.05404976 | 1 | 2 | 0.1218695  | 0.30102999 |
| chr20 | 7103757  | 7170047  | 66291  | 2  | 1 | 2 | 0.1218695  | 0.0429175  | 1 | 4 | 0.1218695  | 0.47744371 |
| chr20 | 7170047  | 7287395  | 117349 | 1  | 0 | 2 | 0          | 0.0429175  | 1 | 4 | 0.30102999 | 0.47744371 |
| chr20 | 7287395  | 7463775  | 176381 | 3  | 0 | 3 | 0          | 0.10122019 | 1 | 4 | 0.30102999 | 0.30102999 |
| chr20 | 7463775  | 7463834  | 60     | 1  | 0 | 3 | 0.1218695  | 0.10122019 | 1 | 4 | 0.1218695  | 0.30102999 |
| chr20 | 7463834  | 7920942  | 457109 | 6  | 1 | 2 | 0.1218695  | 0.0429175  | 1 | 4 | 0.1218695  | 0.47744371 |
| chr20 | 7920942  | 8099800  | 178859 | 4  | 1 | 2 | 0.05404976 | 0.02162467 | 2 | 5 | 0.30102999 | 0.68214471 |
| chr20 | 8099800  | 8130946  | 31147  | 1  | 1 | 2 | 0.1218695  | 0.02162467 | 1 | 5 | 0.1218695  | 0.68214471 |
| chr20 | 8130946  | 8197845  | 66900  | 2  | 1 | 2 | 0.1218695  | 0.01053319 | 1 | 6 | 0.1218695  | 0.91219088 |
| chr20 | 8197845  | 8197904  | 60     | 1  | 1 | 2 | 0.05404976 | 0.01053319 | 2 | 6 | 0.30102999 | 0.91219088 |
| chr20 | 8197904  | 8323034  | 125131 | 2  | 1 | 2 | 0.1218695  | 0.01053319 | 1 | 6 | 0.1218695  | 0.91219088 |
| chr20 | 8323034  | 8323093  | 60     | 1  | 1 | 3 | 0.05404976 | 0.03070643 | 2 | 6 | 0.30102999 | 0.63695542 |
| chr20 | 8323093  | 8403029  | 79937  | 2  | 1 | 2 | 0.05404976 | 0.01053319 | 2 | 6 | 0.30102999 | 0.91219088 |
| chr20 | 8403029  | 8403088  | 60     | 1  | 1 | 3 | 0.05404976 | 0.03070643 | 2 | 6 | 0.30102999 | 0.63695542 |
| chr20 | 8403088  | 8509979  | 106892 | 2  | 1 | 2 | 0.05404976 | 0.01053319 | 2 | 6 | 0.30102999 | 0.91219088 |
| chr20 | 8509979  | 8510038  | 60     | 1  | 1 | 3 | 0.05404976 | 0.03070643 | 2 | 6 | 0.30102999 | 0.63695542 |
| chr20 | 8510038  | 8639165  | 129128 | 2  | 1 | 2 | 0.05404976 | 0.01053319 | 2 | 6 | 0.30102999 | 0.91219088 |
| chr20 | 8639165  | 8639224  | 60     | 1  | 1 | 3 | 0.02438896 | 0.01598258 | 3 | 7 | 0.51676182 | 0.84395715 |
| chr20 | 8639224  | 8821878  | 182655 | 4  | 1 | 2 | 0.1218695  | 0.01053319 | 1 | 6 | 0.1218695  | 0.91219088 |
| chr20 | 8821878  | 8821937  | 60     | 1  | 1 | 3 | 0.05404976 | 0.01598258 | 2 | 7 | 0.30102999 | 0.84395715 |
| chr20 | 8821937  | 8881577  | 59621  | 2  | 1 | 3 | 0.05404976 | 0.03070643 | 2 | 6 | 0.30102999 | 0.63695542 |
| chr20 | 8881577  | 9013081  | 131525 | 1  | 1 | 3 | 0.1218695  | 0.03070643 | 1 | 6 | 0.1218695  | 0.63695542 |
| chr20 | 9013081  | 9013140  | 60     | 1  | 1 | 3 | 0.1218695  | 0.01598258 | 3 | 7 | 0.1218695  | 0.84395715 |
| chr20 | 9013140  | 9243926  | 230787 | 4  | 1 | 1 | 0.1218695  | 0.03070643 | 1 | 6 | 0.1218695  | 0.63695542 |
| chr20 | 9243926  | 9288512  | 44587  | 2  | 1 | 3 | 0.05404976 | 0.03070643 | 2 | 6 | 0.30102999 | 0.63695542 |
| chr20 | 9288512  | 9347837  | 59261  | 1  | 1 | 2 | 0.05404976 | 0.01053319 | 2 | 6 | 0.30102999 | 0.91219088 |
| chr20 | 9347837  | 9401939  | 54103  | 2  | 1 | 2 | 0.05404976 | 0.00493743 | 2 | 7 | 0.30102999 | 1.16581773 |
| chr20 | 9401939  | 9454441  | 52503  | 2  | 1 | 5 | 0.02438896 | 0.07511598 | 3 | 7 | 0.51676182 | 0.43181735 |
| chr20 | 9454441  | 9498881  | 44441  | 1  | 1 | 3 | 0.02438896 | 0.01598258 | 3 | 7 | 0.51676182 | 0.84395715 |
| chr20 | 9498881  | 9511120  | 12240  | 2  | 1 | 3 | 0.02438896 | 0.03070643 | 3 | 6 | 0.51676182 | 0.63695542 |
| chr20 | 9511120  | 9624938  | 113819 | 3  | 1 | 5 | 0.02438896 | 0.12309572 | 3 | 6 | 0.51676182 | 0.30102999 |
| chr20 | 9624938  | 9822641  | 197704 | 5  | 1 | 5 | 0.02438896 | 0.07511598 | 3 | 7 | 0.51676182 | 0.43181735 |
| chr20 | 9822641  | 9985305  | 162665 | 1  | 1 | 5 | 0.02438896 | 0.12309572 | 3 | 6 | 0.51676182 | 0.30102999 |
| chr20 | 9985305  | 10124855 | 139551 | 3  | 1 | 4 | 0.02438896 | 0.06711372 | 3 | 6 | 0.51676182 | 0.44141547 |
| chr20 | 10124855 | 10124914 | 60     | 1  | 1 | 5 | 0.02438896 | 0.07511598 | 3 | 7 | 0.51676182 | 0.43181735 |
| chr20 | 10124914 | 10265343 | 104030 | 2  | 1 | 5 | 0.02438896 | 0.12309572 | 3 | 6 | 0.51676182 | 0.30102999 |
| chr20 | 10265343 | 10265402 | 60     | 1  | 2 | 5 | 0.08289318 | 0.12309572 | 3 | 6 | 0.30102999 | 0.30102999 |
| chr20 | 10265402 | 10340481 | 75080  | 2  | 1 | 3 | 0.08289318 | 0.05670724 | 3 | 5 | 0.30102999 | 0.45545077 |
| chr20 | 10340481 | 10340540 | 60     | 1  | 3 | 4 | 0.10122019 | 0.06711372 | 4 | 6 | 0.30102999 | 0.44141547 |
| chr20 | 10340540 | 10389352 | 48813  | 1  | 2 | 4 | 0.08289318 | 0.06711372 | 3 | 6 | 0.30102999 | 0.44141547 |
| chr20 | 10389352 | 10445325 | 55974  | 3  | 2 | 4 | 0.08289318 | 0.03812622 | 3 | 7 | 0.30102999 | 0.60763643 |
| chr20 | 10445325 | 10534536 | 89212  | 2  | 2 | 3 | 0.1575501  | 0.03070643 | 2 | 6 | 0.1575501  | 0.63695542 |
| chr20 | 10534536 | 10856785 | 322250 | 5  | 1 | 3 | 0.05404976 | 0.05670724 | 5 | 5 | 0.30102999 | 0.45545077 |
| chr20 | 10856785 | 11009283 | 152499 | 4  | 2 | 3 | 0.1575501  | 0.05670724 | 2 | 5 | 0.1575501  | 0.45545077 |
| chr20 | 11009283 | 11009342 | 60     | 1  | 3 | 3 | 0.17593012 | 0.05670724 | 3 | 5 | 0.17593012 | 0.45545077 |
| chr20 | 11009342 | 11229967 | 220626 | 2  | 1 | 2 | 0.05404976 | 0.0429175  | 2 | 4 | 0.30102999 | 0.47744371 |
| chr20 | 11229967 | 11230026 | 60     | 1  | 1 | 2 | 0.02438896 | 0.0429175  | 3 | 4 | 0.51676182 | 0.47744371 |
| chr20 | 11230026 | 11325716 | 95691  | 1  | 1 | 2 | 0.1218695  | 0.0429175  | 1 | 4 | 0.1218695  | 0.47744371 |
| chr20 | 11325716 | 11479769 | 154054 | 1  | 1 | 2 | 0.1218695  | 0.08289318 | 1 | 3 | 0.1218695  | 0.30102999 |
| chr20 | 11479769 | 11479828 | 60     | 1  | 2 | 2 | 0.30102999 | 0.08289318 | 1 | 3 | 0.05404976 | 0.30102999 |
| chr20 | 11479828 | 11729374 | 249547 | 2  | 2 | 1 | 0.30102999 | 0.1218695  | 1 | 1 | 0.05404976 | 0.1218695  |
| chr20 | 11729374 | 11810237 | 80864  | 2  | 2 | 1 | 0.30102999 | 0.05404976 | 2 | 2 | 0.05404976 | 0.30102999 |
| chr20 | 11810237 | 12089631 | 279395 | 3  | 2 | 1 | 0.30102999 | 0.1218695  | 1 | 1 | 0.05404976 | 0.1218695  |
| chr20 | 12089631 | 12089690 | 60     | 1  | 3 | 1 | 0.51676182 | 0.1218695  | 1 | 1 | 0.1218695  | 0.1218695  |
| chr20 | 12089690 | 12272243 | 182554 | 2  | 1 | 0 | 0.30102999 | 0          | 1 | 1 | 0.05404976 | 0.30102999 |
| chr20 | 12272243 | 12511311 | 239069 | 0  | 1 | 0 | 0.1218695  | 0          | 1 | 1 | 0.1218695  | 0.30102999 |
| chr20 | 12511311 | 12703981 | 192671 | 2  | 1 | 0 | 0.1218695  | 0          | 1 | 3 | 0.1218695  | 0.93173516 |
| chr20 | 12703981 | 12889507 | 185527 | 1  | 1 | 0 | 0.1218695  | 0          | 1 | 1 | 0.1218695  | 0.30102999 |
| chr20 | 12889507 | 12889552 | 100446 | 2  | 2 | 1 | 0.30102999 | 0.1218695  | 1 | 1 | 0.05404976 | 0.1218695  |
| chr20 | 12889552 | 13131861 | 141910 | 4  | 2 | 2 | 0.1575501  | 0.08289318 | 2 | 3 | 0.1575501  | 0.30102999 |
| chr20 | 13131861 | 13131920 | 60     | 1  | 3 | 2 | 0.30102999 | 0.08289318 | 2 | 3 | 0.08289318 | 0.30102999 |
| chr20 | 13131920 | 13194205 | 62286  | 1  | 2 | 2 | 0.1575501  | 0.08289318 | 2 | 3 | 0.1575501  | 0.30102999 |
| chr20 | 13194205 | 13438816 | 244612 | 5  | 2 | 3 | 0.1575501  | 0.17593012 | 2 | 3 | 0.1575501  | 0.17593012 |
| chr20 | 13438816 | 13797549 | 358734 | 10 | 2 | 4 | 0.1575501  | 0.30102999 | 2 | 3 | 0.1575501  | 0.10122019 |
| chr20 | 13797549 | 14190591 | 393043 | 10 | 2 | 4 | 0.1575501  | 0.18734596 | 2 | 4 | 0.1575501  | 0.18734596 |
| chr20 | 14190591 | 14244838 | 54248  | 1  | 1 | 4 | 0.05404976 | 0.18734596 | 2 | 4 | 0.30102999 | 0.18734596 |
| chr20 | 14244838 | 14395797 | 150560 | 5  | 1 | 4 | 0.1218695  | 0.18734596 | 1 | 1 | 0.1218695  | 0.18734596 |
| chr20 | 14395797 | 14395856 | 60     | 1  | 1 | 5 | 0.1218695  | 0.30102999 | 1 | 4 | 0.1218695  | 0.11390336 |
| chr20 | 14395856 | 14434373 | 38518  | 1  | 1 | 4 | 0.1218695  | 0.18734596 | 1 | 4 | 0.1218695  | 0.18734596 |
| chr20 | 14434373 | 14434432 | 60     | 1  | 1 | 2 | 0.30102999 | 0.18734596 | 1 | 4 | 0.05404976 | 0.18734596 |
| chr20 | 14434432 | 14501723 | 67292  | 1  | 1 | 4 | 0.1218695  | 0.18734596 | 1 | 4 | 0.1218695  | 0.18734596 |
| chr20 | 14501723 | 14524518 | 22796  | 2  | 1 | 5 | 0.1218695  | 0.30102999 | 1 | 4 | 0.1218695  | 0.11390336 |
| chr20 | 14524518 | 14524577 | 60     | 1  | 2 | 5 | 0.30102999 | 0.30102999 | 1 | 4 | 0.05404976 | 0.11390336 |
| chr20 | 14524577 | 14629123 | 104547 | 2  | 1 | 5 | 0.1218695  | 0.30102999 | 1 | 4 | 0.1218695  | 0.11390336 |
| chr20 | 14629123 | 14700099 | 70977  | 2  | 1 | 5 | 0.30102999 | 0.30102999 | 1 | 4 | 0.05404976 | 0.11390336 |
| chr20 | 14700099 | 14944155 | 244057 | 4  | 1 | 5 | 0.1218695  | 0.45545077 | 1 | 3 | 0.1218695  | 0.05670724 |
| chr20 | 14944155 | 14944214 | 60     | 1  | 1 | 6 | 0.1218695  | 0.30102999 | 1 | 5 | 0.1218695  | 0.12309572 |
| chr20 | 14944214 | 15199397 | 255184 | 5  | 1 | 5 | 0.1218695  | 0.30102999 | 1 | 4 | 0.1218695  | 0.11390336 |
| chr20 | 15199397 | 15268061 | 68665  | 1  | 1 | 4 | 0.1218695  | 0.30102999 | 1 | 3 | 0.1218695  | 0.10122019 |
| chr20 | 15268061 | 15329728 | 61668  | 1  | 1 | 3 | 0.1218695  | 0.30102999 | 1 | 2 | 0.1218695  | 0.08289318 |
| chr20 | 15329728 | 15397115 | 67388  | 2  | 1 | 3 | 0.1218695  | 0.17593012 | 1 | 3 | 0.1218695  | 0.17593012 |
| chr20 | 15397115 | 15397174 | 60     | 1  | 1 | 3 | 0.1218695  | 0.10122019 | 1 | 4 | 0.1218695  | 0.30102999 |
| chr20 | 15397174 | 15641319 | 244146 | 5  | 1 | 2 | 0.1218695  | 0.0429175  | 1 | 4 | 0.1218695  | 0.47744371 |
| chr20 | 15641319 | 15743395 | 102077 | 3  | 1 | 2 | 0.05404976 | 0.0429175  | 2 | 4 | 0.30102999 | 0.47744371 |
| chr20 | 15743395 | 15831543 | 88149  | 3  | 1 | 3 | 0.05404976 | 0.10122019 | 2 | 4 | 0.30102999 | 0.30102999 |
| chr20 | 15831543 | 15932490 | 100948 | 2  | 1 | 3 | 0.05404976 | 0.17593012 | 2 | 3 | 0.30102999 | 0.17593012 |
| chr20 | 15932490 | 16125902 | 193413 | 2  | 1 | 2 | 0.1218695  | 0.08289318 | 1 | 3 | 0.1218695  | 0.30102999 |
| chr20 | 16125902 | 16125961 | 60     | 1  | 1 | 3 | 0.1218695  | 0.17593012 | 1 | 3 | 0.1218695  | 0.17593012 |
| chr20 | 16125961 | 16253301 | 127341 | 1  | 1 | 2 | 0.1218695  | 0.1575501  | 1 | 2 | 0.1218695  | 0.1575501  |
| chr20 | 16253301 | 16293025 | 39725  | 2  | 1 | 2 | 0.1218695  | 0.08289318 | 1 | 3 | 0.1218695  | 0.30102999 |
| chr20 | 16293025 | 16360098 | 67074  | 1  | 1 | 2 | 0.1218695  | 0.         |   |   |            |            |

|       |          |          |        |    |   |   |            |            |   |   |            |            |
|-------|----------|----------|--------|----|---|---|------------|------------|---|---|------------|------------|
| chr20 | 20634153 | 20634212 | 60     | 1  | 0 | 1 | 0          | 0.02438896 | 1 | 3 | 0.30102999 | 0.51676182 |
| chr20 | 20634212 | 20788910 | 154699 | 2  | 0 | 1 | 0          | 0.05404976 | 1 | 3 | 0.30102999 | 0.30102999 |
| chr20 | 20788910 | 20916693 | 127784 | 2  | 0 | 0 | 0          | 0.02438896 | 1 | 2 | 0.30102999 | 0.51676182 |
| chr20 | 20916693 | 20916752 | 60     | 1  | 0 | 3 | 0          | 0.17593012 | 1 | 3 | 0.30102999 | 0.17593012 |
| chr20 | 20916752 | 21175719 | 258968 | 3  | 0 | 2 | 0          | 0.08289318 | 1 | 3 | 0.30102999 | 0.30102999 |
| chr20 | 21175719 | 21494492 | 318774 | 7  | 0 | 1 | 0          | 0.1218695  | 1 | 1 | 0.30102999 | 0.1218695  |
| chr20 | 21494492 | 21582785 | 88294  | 1  | 0 | 1 | 0          | 0.1218695  | 1 | 0 | 0.30102999 | 0.1218695  |
| chr20 | 21582785 | 21582844 | 60     | 1  | 0 | 2 | 0          | 0.1575501  | 0 | 2 | 0          | 0.1575501  |
| chr20 | 21582844 | 21784284 | 201441 | 3  | 0 | 0 | 0          | 0.30102999 | 0 | 1 | 0          | 0.05404976 |
| chr20 | 21784284 | 22067778 | 283495 | 3  | 0 | 2 | 0          | 0.1575501  | 0 | 2 | 0          | 0.1575501  |
| chr20 | 22067778 | 22145630 | 77853  | 2  | 0 | 2 | 0          | 0.02162467 | 1 | 5 | 0.30102999 | 0.68214471 |
| chr20 | 22145630 | 22368323 | 222694 | 2  | 0 | 2 | 0          | 0.0429175  | 0 | 4 | 0          | 0.47744371 |
| chr20 | 22368323 | 22505169 | 136847 | 2  | 0 | 2 | 0          | 0.0429175  | 0 | 4 | 0.30102999 | 0.47744371 |
| chr20 | 22505169 | 22562206 | 57038  | 2  | 0 | 3 | 0          | 0.10122019 | 1 | 4 | 0.30102999 | 0.30102999 |
| chr20 | 22562206 | 22564644 | 2439   | 2  | 0 | 3 | 0          | 0.03070643 | 1 | 6 | 0.30102999 | 0.63695542 |
| chr20 | 22564644 | 22732306 | 167663 | 2  | 0 | 3 | 0          | 0.05670724 | 1 | 5 | 0.30102999 | 0.45545077 |
| chr20 | 22732306 | 22732365 | 60     | 1  | 1 | 3 | 0.1218695  | 0.05670724 | 1 | 5 | 0.1218695  | 0.45545077 |
| chr20 | 22732365 | 22773013 | 40649  | 1  | 1 | 3 | 0.1218695  | 0.17593012 | 1 | 3 | 0.1218695  | 0.17593012 |
| chr20 | 22773013 | 22886006 | 112994 | 2  | 2 | 3 | 0.30102999 | 0.17593012 | 1 | 3 | 0.05404976 | 0.17593012 |
| chr20 | 22886006 | 22886065 | 60     | 1  | 2 | 3 | 0.30102999 | 0.10122019 | 1 | 4 | 0.05404976 | 0.30102999 |
| chr20 | 22886065 | 2327197  | 41133  | 1  | 2 | 3 | 0.30102999 | 0.17593012 | 1 | 3 | 0.05404976 | 0.17593012 |
| chr20 | 2327197  | 23062118 | 134922 | 1  | 1 | 3 | 0.30102999 | 0.17593012 | 1 | 3 | 0          | 0.17593012 |
| chr20 | 23062118 | 23113160 | 51043  | 1  | 1 | 2 | 0.30102999 | 0.08289318 | 0 | 0 | 0          | 0.30102999 |
| chr20 | 23113160 | 23184285 | 71126  | 2  | 2 | 2 | 0.61140001 | 0.0429175  | 0 | 4 | 0          | 0.47744371 |
| chr20 | 23184285 | 23285956 | 101672 | 2  | 2 | 2 | 0.61140001 | 0.02162467 | 0 | 4 | 0          | 0.68214471 |
| chr20 | 23285956 | 23421007 | 135052 | 4  | 2 | 2 | 0.30102999 | 0.0429175  | 0 | 4 | 0          | 0.47744371 |
| chr20 | 23421007 | 23474940 | 53934  | 3  | 1 | 2 | 0.1218695  | 0.0429175  | 1 | 4 | 0.1218695  | 0.47744371 |
| chr20 | 23474940 | 23476568 | 1629   | 2  | 2 | 3 | 0.30102999 | 0.05670724 | 1 | 5 | 0.05404976 | 0.45545077 |
| chr20 | 23476568 | 23545417 | 68850  | 2  | 1 | 2 | 0.1218695  | 0.02162467 | 1 | 5 | 0.1218695  | 0.68214471 |
| chr20 | 23545417 | 23545476 | 60     | 1  | 2 | 3 | 0.30102999 | 0.05670724 | 1 | 5 | 0.05404976 | 0.45545077 |
| chr20 | 23545476 | 23615548 | 70073  | 1  | 2 | 3 | 0.30102999 | 0.10122019 | 1 | 4 | 0.05404976 | 0.30102999 |
| chr20 | 23615548 | 23615607 | 60     | 1  | 2 | 3 | 0.30102999 | 0.05670724 | 1 | 5 | 0.05404976 | 0.45545077 |
| chr20 | 23615607 | 23893301 | 277695 | 4  | 1 | 2 | 0.1218695  | 0.02162467 | 1 | 5 | 0.1218695  | 0.68214471 |
| chr20 | 23893301 | 23977553 | 84253  | 2  | 2 | 2 | 0.30102999 | 0.02162467 | 1 | 5 | 0.05404976 | 0.68214471 |
| chr20 | 23977553 | 24067079 | 89527  | 1  | 2 | 2 | 0.30102999 | 0.0429175  | 1 | 4 | 0.05404976 | 0.47744371 |
| chr20 | 24067079 | 24523761 | 456683 | 5  | 2 | 2 | 0.61140001 | 0.0429175  | 0 | 4 | 0          | 0.47744371 |
| chr20 | 24523761 | 24523815 | 55     | 1  | 4 | 2 | 1.26272838 | 0.0429175  | 0 | 4 | 0          | 0.47744371 |
| chr20 | 24523815 | 24590008 | 66194  | 2  | 3 | 2 | 0.93173516 | 0.0429175  | 0 | 4 | 0          | 0.47744371 |
| chr20 | 24590008 | 24590067 | 60     | 1  | 4 | 2 | 1.26272838 | 0.0429175  | 0 | 4 | 0          | 0.47744371 |
| chr20 | 24590067 | 29959980 | 71504  | 2  | 3 | 0 | 0.10122019 | 0          | 4 | 1 | 0.30102999 | 0.30102999 |
| chr20 | 29959980 | 29991221 | 31242  | 4  | 3 | 0 | 0.10122019 | 0          | 4 | 2 | 0.30102999 | 0.61140001 |
| chr20 | 29991221 | 29991280 | 60     | 1  | 3 | 1 | 0.10122019 | 0.05404976 | 4 | 2 | 0.30102999 | 0.30102999 |
| chr20 | 29991280 | 30037874 | 46595  | 1  | 3 | 0 | 0.10122019 | 0          | 4 | 2 | 0.30102999 | 0.61140001 |
| chr20 | 30037874 | 30037933 | 60     | 1  | 3 | 0 | 0.10122019 | 0          | 4 | 4 | 0.30102999 | 1.26272838 |
| chr20 | 30037933 | 30128470 | 90538  | 2  | 3 | 0 | 0.17593012 | 0          | 3 | 4 | 0.17593012 | 1.26272838 |
| chr20 | 30128470 | 30193614 | 65145  | 1  | 3 | 0 | 0.30102999 | 0          | 2 | 4 | 0.08289318 | 1.26272838 |
| chr20 | 30193614 | 30252486 | 58873  | 3  | 3 | 1 | 0.30102999 | 0.01091641 | 2 | 4 | 0.08289318 | 0.76005302 |
| chr20 | 30252486 | 30367350 | 114865 | 5  | 3 | 1 | 0.17593012 | 0.01091641 | 3 | 4 | 0.17593012 | 0.76005302 |
| chr20 | 30367350 | 30412316 | 44967  | 2  | 3 | 2 | 0.10122019 | 0.0429175  | 0 | 4 | 0.30102999 | 0.47744371 |
| chr20 | 30412316 | 30609634 | 197319 | 4  | 1 | 1 | 0.10122019 | 0.01091641 | 4 | 4 | 0.30102999 | 0.76005302 |
| chr20 | 30609634 | 30844353 | 234720 | 9  | 3 | 2 | 0.10122019 | 0.0429175  | 4 | 4 | 0.30102999 | 0.47744371 |
| chr20 | 30844353 | 30914548 | 70196  | 2  | 3 | 1 | 0.10122019 | 0.01091641 | 4 | 4 | 0.30102999 | 0.76005302 |
| chr20 | 30914548 | 30922687 | 8140   | 2  | 3 | 2 | 0.10122019 | 0.0429175  | 4 | 4 | 0.30102999 | 0.47744371 |
| chr20 | 30922687 | 31025112 | 102426 | 2  | 3 | 1 | 0.10122019 | 0.01091641 | 4 | 4 | 0.30102999 | 0.76005302 |
| chr20 | 31025112 | 31031845 | 6734   | 2  | 5 | 2 | 0.30102999 | 0.0429175  | 4 | 4 | 0.11390336 | 0.47744371 |
| chr20 | 31031845 | 31062545 | 30701  | 1  | 4 | 2 | 0.18734596 | 0.0429175  | 4 | 4 | 0.18734596 | 0.47744371 |
| chr20 | 31062545 | 31121463 | 58919  | 1  | 3 | 2 | 0.10122019 | 0.0429175  | 4 | 4 | 0.30102999 | 0.47744371 |
| chr20 | 31121463 | 31184507 | 63045  | 1  | 3 | 1 | 0.10122019 | 0.01091641 | 4 | 4 | 0.30102999 | 0.76005302 |
| chr20 | 31184507 | 31184566 | 60     | 1  | 4 | 1 | 0.18734596 | 0.01091641 | 4 | 4 | 0.18734596 | 0.76005302 |
| chr20 | 31184566 | 31396102 | 211537 | 6  | 3 | 1 | 0.10122019 | 0.01091641 | 4 | 4 | 0.30102999 | 0.76005302 |
| chr20 | 31396102 | 31683690 | 287589 | 7  | 3 | 2 | 0.10122019 | 0.0429175  | 4 | 4 | 0.30102999 | 0.47744371 |
| chr20 | 31683690 | 31748361 | 64672  | 3  | 1 | 1 | 0.17593012 | 0.01091641 | 3 | 4 | 0.17593012 | 0.76005302 |
| chr20 | 31748361 | 31790344 | 41984  | 2  | 3 | 1 | 0.10122019 | 0.01091641 | 4 | 4 | 0.30102999 | 0.76005302 |
| chr20 | 31790344 | 31814296 | 23953  | 2  | 3 | 1 | 0.05670724 | 0.01091641 | 5 | 4 | 0.45545077 | 0.76005302 |
| chr20 | 31814296 | 31897453 | 83158  | 3  | 1 | 1 | 0.10122019 | 0.01091641 | 4 | 4 | 0.30102999 | 0.76005302 |
| chr20 | 31897453 | 31897509 | 57     | 1  | 3 | 2 | 0.10122019 | 0.0429175  | 4 | 4 | 0.30102999 | 0.47744371 |
| chr20 | 31897509 | 31967519 | 70011  | 1  | 3 | 1 | 0.10122019 | 0.01091641 | 4 | 4 | 0.30102999 | 0.76005302 |
| chr20 | 31967519 | 32060886 | 93368  | 3  | 1 | 1 | 0.10122019 | 0.02438896 | 3 | 0 | 0.30102999 | 0.51676182 |
| chr20 | 32060886 | 32060945 | 60     | 1  | 4 | 2 | 0.18734596 | 0.08289318 | 4 | 4 | 0.30102999 | 0.30102999 |
| chr20 | 32060945 | 32164936 | 103992 | 2  | 3 | 2 | 0.10122019 | 0.08289318 | 4 | 3 | 0.30102999 | 0.30102999 |
| chr20 | 32164936 | 32164995 | 60     | 1  | 3 | 2 | 0.10122019 | 0.0429175  | 4 | 4 | 0.30102999 | 0.47744371 |
| chr20 | 32164995 | 32305851 | 140857 | 4  | 3 | 2 | 0.10122019 | 0.08289318 | 4 | 3 | 0.30102999 | 0.30102999 |
| chr20 | 32305851 | 32407211 | 101361 | 3  | 3 | 1 | 0.10122019 | 0.02438896 | 4 | 3 | 0.30102999 | 0.51676182 |
| chr20 | 32407211 | 32518203 | 110993 | 3  | 3 | 2 | 0.10122019 | 0.08289318 | 4 | 3 | 0.30102999 | 0.30102999 |
| chr20 | 32518203 | 32854720 | 336518 | 8  | 3 | 2 | 0.05670724 | 0.08289318 | 5 | 3 | 0.45545077 | 0.30102999 |
| chr20 | 32854720 | 32872383 | 17664  | 2  | 4 | 2 | 0.06713722 | 0.08289318 | 6 | 3 | 0.44141547 | 0.30102999 |
| chr20 | 32872383 | 32884283 | 11901  | 1  | 3 | 2 | 0.30706643 | 0.08289318 | 6 | 3 | 0.63695542 | 0.30102999 |
| chr20 | 32884283 | 32972385 | 88103  | 2  | 2 | 2 | 0.01053319 | 0.08289318 | 6 | 3 | 0.91219088 | 0.30102999 |
| chr20 | 32972385 | 32972444 | 60     | 1  | 3 | 2 | 0.03070643 | 0.08289318 | 6 | 3 | 0.63695542 | 0.30102999 |
| chr20 | 32972444 | 33114654 | 142211 | 6  | 2 | 2 | 0.01053319 | 0.08289318 | 6 | 3 | 0.91219088 | 0.30102999 |
| chr20 | 33114654 | 33114713 | 60     | 1  | 2 | 3 | 0.01053319 | 0.17593012 | 6 | 3 | 0.91219088 | 0.17593012 |
| chr20 | 33114713 | 33184090 | 33378  | 1  | 2 | 3 | 0.02162467 | 0.17593012 | 5 | 3 | 0.68214471 | 0.17593012 |
| chr20 | 33184090 | 33148386 | 297    | 2  | 3 | 0 | 0.02162467 | 0.10122019 | 5 | 4 | 0.68214471 | 0.30102999 |
| chr20 | 33148386 | 33176228 | 27843  | 1  | 2 | 3 | 0.0429175  | 0.10122019 | 4 | 4 | 0.47744371 | 0.30102999 |
| chr20 | 33176228 | 33176286 | 59     | 1  | 3 | 3 | 0.05670724 | 0.10122019 | 5 | 4 | 0.45545077 | 0.30102999 |
| chr20 | 33176286 | 33384802 | 208517 | 5  | 3 | 3 | 0.17593012 | 0.10122019 | 3 | 4 | 0.17593012 | 0.30102999 |
| chr20 | 33384802 | 33652822 | 268021 | 12 | 3 | 3 | 0.10122019 | 0.10122019 | 4 | 4 | 0.30102999 | 0.30102999 |
| chr20 | 33652822 | 33719881 | 67060  | 4  | 3 | 3 | 0.11390336 | 0.10122019 | 5 | 4 | 0.30102999 | 0.30102999 |
| chr20 | 33719881 | 33820921 | 101041 | 2  | 4 | 2 | 0.11390336 | 0.0429175  | 5 | 4 | 0.30102999 | 0.47744371 |
| chr20 | 33820921 | 33834852 | 13932  | 4  | 3 | 3 | 0.11390336 | 0.10122019 | 5 | 4 | 0.30102999 | 0.30102999 |
| chr20 | 33834852 | 33873527 | 38676  | 2  | 4 | 3 | 0.11390336 | 0.0429175  | 5 | 4 | 0.30102999 | 0.47744371 |
| chr20 | 33873527 | 33879282 | 5756   | 2  | 4 | 3 | 0.11390336 | 0.1        |   |   |            |            |

|       |          |          |        |    |   |            |            |            |   |            |            |            |
|-------|----------|----------|--------|----|---|------------|------------|------------|---|------------|------------|------------|
| chr20 | 35929628 | 35977546 | 47919  | 1  | 2 | 1          | 0.08289318 | 0.02438896 | 3 | 3          | 0.30102999 | 0.51676182 |
| chr20 | 35977546 | 36033814 | 56269  | 4  | 3 | 1          | 0.17593012 | 0.02438896 | 3 | 3          | 0.17593012 | 0.51676182 |
| chr20 | 36033814 | 36237524 | 203711 | 3  | 2 | 1          | 0.08289318 | 0.02438896 | 3 | 3          | 0.30102999 | 0.51676182 |
| chr20 | 36237524 | 36316586 | 79063  | 2  | 2 | 2          | 0.08289318 | 0.0429175  | 3 | 4          | 0.30102999 | 0.47744371 |
| chr20 | 36316586 | 36316645 | 60     | 1  | 3 | 2          | 0.17593012 | 0.02162467 | 3 | 5          | 0.17593012 | 0.68214471 |
| chr20 | 36316645 | 36406083 | 89439  | 2  | 1 | 2          | 0.02438896 | 0.0429175  | 3 | 4          | 0.51676182 | 0.47744371 |
| chr20 | 36406083 | 36406138 | 56     | 1  | 3 | 2          | 0.17593012 | 0.0429175  | 3 | 4          | 0.17593012 | 0.47744371 |
| chr20 | 36406138 | 36468150 | 62013  | 1  | 3 | 2          | 0.17593012 | 0.08289318 | 3 | 3          | 0.17593012 | 0.30102999 |
| chr20 | 36468150 | 36573752 | 105603 | 2  | 3 | 1          | 0.17593012 | 0.02438896 | 3 | 3          | 0.17593012 | 0.51676182 |
| chr20 | 36573752 | 36611612 | 37861  | 1  | 2 | 1          | 0.08289318 | 0.02438896 | 3 | 3          | 0.30102999 | 0.51676182 |
| chr20 | 36611612 | 36611671 | 60     | 1  | 2 | 2          | 0.08289318 | 0.08289318 | 3 | 3          | 0.30102999 | 0.30102999 |
| chr20 | 36611671 | 36676752 | 65082  | 2  | 1 | 2          | 0.02438896 | 0.08289318 | 3 | 3          | 0.51676182 | 0.30102999 |
| chr20 | 36676752 | 36768739 | 91988  | 3  | 2 | 2          | 0.08289318 | 0.08289318 | 3 | 3          | 0.30102999 | 0.30102999 |
| chr20 | 36768739 | 36892254 | 123516 | 2  | 2 | 1          | 0.08289318 | 0.02438896 | 3 | 3          | 0.30102999 | 0.51676182 |
| chr20 | 36892254 | 37045370 | 153117 | 6  | 2 | 2          | 0.08289318 | 0.08289318 | 3 | 3          | 0.30102999 | 0.30102999 |
| chr20 | 37045370 | 37045429 | 60     | 1  | 3 | 2          | 0.17593012 | 0.08289318 | 3 | 3          | 0.17593012 | 0.30102999 |
| chr20 | 37045429 | 37213940 | 168512 | 6  | 3 | 1          | 0.17593012 | 0.02438896 | 3 | 3          | 0.17593012 | 0.51676182 |
| chr20 | 37213940 | 37289296 | 75357  | 1  | 2 | 1          | 0.08289318 | 0.02438896 | 3 | 3          | 0.30102999 | 0.51676182 |
| chr20 | 37289296 | 37354345 | 65050  | 1  | 2 | 0          | 0.08289318 | 0.08289318 | 3 | 3          | 0.30102999 | 0.93173516 |
| chr20 | 37354345 | 37394122 | 39778  | 3  | 0 | 0          | 0.17593012 | 0          | 3 | 3          | 0.17593012 | 0.93173516 |
| chr20 | 37394122 | 37581170 | 187049 | 5  | 2 | 0          | 0.08289318 | 0          | 3 | 3          | 0.30102999 | 0.93173516 |
| chr20 | 37581170 | 37763470 | 182301 | 1  | 2 | 0          | 0.30102999 | 0          | 1 | 3          | 0.05404976 | 0.93173516 |
| chr20 | 37763470 | 37763529 | 60     | 1  | 2 | 0          | 0.1575501  | 0          | 2 | 2          | 0.1575501  | 0.93173516 |
| chr20 | 37763529 | 38348446 | 584918 | 6  | 2 | 0          | 0.30102999 | 0          | 1 | 3          | 0.05404976 | 0.93173516 |
| chr20 | 38348446 | 38481459 | 133014 | 1  | 1 | 0          | 0.1218695  | 0          | 1 | 3          | 0.1218695  | 0.93173516 |
| chr20 | 38481459 | 38614807 | 133349 | 1  | 1 | 0          | 0.1218695  | 0          | 1 | 2          | 0.1218695  | 0.61140001 |
| chr20 | 38614807 | 38704864 | 90058  | 2  | 2 | 0          | 0.30102999 | 0          | 1 | 2          | 0.05404976 | 0.61140001 |
| chr20 | 38704864 | 39057994 | 353131 | 4  | 2 | 0          | 0.30102999 | 0          | 1 | 3          | 0.05404976 | 0.93173516 |
| chr20 | 39057994 | 39216522 | 158529 | 3  | 3 | 1          | 0.30102999 | 0.02438896 | 2 | 3          | 0.08289318 | 0.51676182 |
| chr20 | 39216522 | 39376295 | 159774 | 2  | 3 | 1          | 0.30102999 | 0.01091641 | 2 | 4          | 0.08289318 | 0.76005302 |
| chr20 | 39376295 | 39376354 | 60     | 1  | 3 | 2          | 0.30102999 | 0.0429175  | 2 | 4          | 0.08289318 | 0.47744371 |
| chr20 | 39376354 | 39708695 | 332342 | 6  | 3 | 2          | 0.30102999 | 0.01091641 | 2 | 4          | 0.08289318 | 0.76005302 |
| chr20 | 39708695 | 39794141 | 85447  | 3  | 2 | 2          | 0.30102999 | 0.0429175  | 2 | 4          | 0.08289318 | 0.47744371 |
| chr20 | 39794141 | 39833815 | 39675  | 2  | 1 | 0.30102999 | 0.01091641 | 2          | 4 | 0.08289318 | 0.76005302 |            |
| chr20 | 39833815 | 39833874 | 60     | 1  | 3 | 2          | 0.17593012 | 0.0429175  | 3 | 4          | 0.17593012 | 0.47744371 |
| chr20 | 39833874 | 39897685 | 63812  | 1  | 3 | 1          | 0.17593012 | 0.01091641 | 3 | 4          | 0.17593012 | 0.76005302 |
| chr20 | 39897685 | 40029237 | 131553 | 4  | 3 | 1          | 0.10122019 | 0.01091641 | 4 | 4          | 0.30102999 | 0.76005302 |
| chr20 | 40029237 | 40199230 | 169994 | 5  | 3 | 2          | 0.10122019 | 0.0429175  | 4 | 4          | 0.30102999 | 0.47744371 |
| chr20 | 40199230 | 40351646 | 152417 | 2  | 3 | 1          | 0.10122019 | 0.01091641 | 4 | 4          | 0.30102999 | 0.76005302 |
| chr20 | 40351646 | 40532315 | 180670 | 2  | 3 | 0          | 0.10122019 | 0          | 4 | 4          | 0.30102999 | 1.26272838 |
| chr20 | 40532315 | 40532374 | 60     | 1  | 3 | 2          | 0.10122019 | 0.02162467 | 4 | 5          | 0.30102999 | 0.68214471 |
| chr20 | 40532374 | 40703565 | 171192 | 2  | 3 | 2          | 0.17593012 | 0.02162467 | 3 | 5          | 0.17593012 | 0.68214471 |
| chr20 | 40703565 | 40776801 | 73237  | 3  | 1 | 1          | 0.17593012 | 0.00478973 | 3 | 5          | 0.17593012 | 1.02643191 |
| chr20 | 40776801 | 40899268 | 122468 | 4  | 3 | 0          | 0.17593012 | 0          | 3 | 5          | 0.17593012 | 1.60515106 |
| chr20 | 40899268 | 41107347 | 208080 | 3  | 3 | 0          | 0.30102999 | 0          | 2 | 5          | 0.08289318 | 1.60515106 |
| chr20 | 41107347 | 41107406 | 60     | 1  | 3 | 0          | 0.17593012 | 0          | 3 | 5          | 0.17593012 | 1.60515106 |
| chr20 | 41107406 | 41180609 | 73204  | 2  | 3 | 0          | 0.30102999 | 0          | 2 | 5          | 0.08289318 | 1.60515106 |
| chr20 | 41180609 | 41224904 | 44296  | 1  | 3 | 0          | 0.30102999 | 0          | 2 | 4          | 0.08289318 | 1.26272838 |
| chr20 | 41224904 | 41278214 | 53311  | 2  | 3 | 0          | 0.17593012 | 0          | 3 | 4          | 0.17593012 | 1.26272838 |
| chr20 | 41278214 | 41312488 | 34275  | 2  | 3 | 0          | 0.17593012 | 0          | 3 | 5          | 0.17593012 | 1.60515106 |
| chr20 | 41312488 | 41312547 | 60     | 1  | 3 | 0          | 0.17593012 | 0          | 3 | 6          | 0.17593012 | 1.95869592 |
| chr20 | 41312547 | 41384495 | 71949  | 1  | 3 | 0          | 0.17593012 | 0          | 3 | 4          | 0.17593012 | 1.26272838 |
| chr20 | 41384495 | 41442588 | 58094  | 1  | 2 | 0          | 0.08289318 | 0          | 3 | 4          | 0.30102999 | 1.26272838 |
| chr20 | 41442588 | 41514540 | 71953  | 1  | 2 | 0          | 0.08289318 | 0          | 3 | 3          | 0.30102999 | 0.93173516 |
| chr20 | 41514540 | 41704257 | 189718 | 4  | 3 | 0          | 0.17593012 | 0          | 3 | 3          | 0.17593012 | 0.93173516 |
| chr20 | 41704257 | 41746533 | 42277  | 1  | 2 | 0          | 0.08289318 | 0          | 3 | 3          | 0.30102999 | 0.93173516 |
| chr20 | 41746533 | 41746592 | 60     | 1  | 2 | 0          | 0.08289318 | 0          | 3 | 4          | 0.30102999 | 1.26272838 |
| chr20 | 41746592 | 41961081 | 214490 | 3  | 2 | 0          | 0.08289318 | 0          | 3 | 3          | 0.30102999 | 0.93173516 |
| chr20 | 41961081 | 42029922 | 68842  | 2  | 2 | 0          | 0.0429175  | 0          | 4 | 3          | 0.47744371 | 0.93173516 |
| chr20 | 42029922 | 42090802 | 60881  | 2  | 2 | 1          | 0.0429175  | 0.02438896 | 4 | 3          | 0.47744371 | 0.51676182 |
| chr20 | 42090802 | 42151032 | 60231  | 2  | 3 | 1          | 0.10122019 | 0.02438896 | 4 | 3          | 0.30102999 | 0.51676182 |
| chr20 | 42151032 | 42223439 | 72408  | 3  | 3 | 1          | 0.10122019 | 0.01091641 | 4 | 3          | 0.30102999 | 0.76005302 |
| chr20 | 42223439 | 42282679 | 59241  | 2  | 3 | 1          | 0.10122019 | 0.02438896 | 4 | 4          | 0.30102999 | 0.51676182 |
| chr20 | 42282679 | 42335068 | 52390  | 4  | 3 | 1          | 0.10122019 | 0.01091641 | 4 | 4          | 0.30102999 | 0.76005302 |
| chr20 | 42335068 | 42674660 | 339993 | 5  | 3 | 1          | 0.10122019 | 0.02438896 | 4 | 3          | 0.30102999 | 0.51676182 |
| chr20 | 42674660 | 42707714 | 33055  | 1  | 3 | 1          | 0.17593012 | 0.02438896 | 3 | 3          | 0.17593012 | 0.51676182 |
| chr20 | 42707714 | 42715044 | 7331   | 2  | 3 | 1          | 0.17593012 | 0.01091641 | 3 | 4          | 0.17593012 | 0.76005302 |
| chr20 | 42715044 | 42741598 | 26555  | 2  | 3 | 1          | 0.10122019 | 0.01091641 | 4 | 4          | 0.30102999 | 0.76005302 |
| chr20 | 42741598 | 42977909 | 32612  | 6  | 3 | 1          | 0.10122019 | 0.02438896 | 3 | 4          | 0.30102999 | 0.51676182 |
| chr20 | 42977909 | 43015519 | 37611  | 3  | 3 | 1          | 0.05670724 | 0.02438896 | 3 | 3          | 0.45545077 | 0.51676182 |
| chr20 | 43015519 | 43015578 | 60     | 1  | 3 | 1          | 0.05670724 | 0.01091641 | 5 | 4          | 0.45545077 | 0.76005302 |
| chr20 | 43015578 | 43104911 | 89334  | 2  | 3 | 1          | 0.10122019 | 0.02438896 | 4 | 3          | 0.30102999 | 0.51676182 |
| chr20 | 43104911 | 43104960 | 50     | 1  | 3 | 1          | 0.05670724 | 0.02438896 | 5 | 3          | 0.45545077 | 0.51676182 |
| chr20 | 43104960 | 43162092 | 57133  | 3  | 3 | 1          | 0.10122019 | 0.02438896 | 4 | 3          | 0.30102999 | 0.51676182 |
| chr20 | 43162092 | 43290901 | 128810 | 4  | 3 | 1          | 0.10122019 | 0.01091641 | 4 | 4          | 0.30102999 | 0.76005302 |
| chr20 | 43290901 | 43347006 | 56106  | 2  | 3 | 1          | 0.10122019 | 0.00478973 | 4 | 3          | 0.30102999 | 1.02643191 |
| chr20 | 43347006 | 43465263 | 118258 | 5  | 3 | 1          | 0.05670724 | 0.00478973 | 5 | 5          | 0.45545077 | 1.02643191 |
| chr20 | 43465263 | 43520556 | 55294  | 1  | 3 | 1          | 0.05670724 | 0.01091641 | 5 | 4          | 0.45545077 | 0.76005302 |
| chr20 | 43520556 | 43653584 | 133029 | 6  | 3 | 1          | 0.03070643 | 0.01091641 | 6 | 4          | 0.63695542 | 0.76005302 |
| chr20 | 43653584 | 43653638 | 55     | 1  | 4 | 1          | 0.03812622 | 0.01091641 | 7 | 4          | 0.60763643 | 0.76005302 |
| chr20 | 43653638 | 43704091 | 50454  | 2  | 4 | 1          | 0.06713722 | 0.01091641 | 6 | 4          | 0.44141547 | 0.76005302 |
| chr20 | 43704091 | 43752761 | 48671  | 2  | 3 | 1          | 0.03070643 | 0.01091641 | 6 | 4          | 0.63695542 | 0.76005302 |
| chr20 | 43752761 | 43752808 | 48     | 1  | 3 | 1          | 0.01598258 | 0.01091641 | 7 | 4          | 0.84395715 | 0.76005302 |
| chr20 | 43752808 | 43881324 | 128517 | 4  | 3 | 1          | 0.03070643 | 0.01091641 | 6 | 4          | 0.63695542 | 0.76005302 |
| chr20 | 43881324 | 44259509 | 378186 | 14 | 3 | 1          | 0.05670724 | 0.01091641 | 5 | 4          | 0.45545077 | 0.76005302 |
| chr20 | 44259509 | 44295572 | 36064  | 1  | 3 | 0          | 0.05670724 | 0          | 5 | 4          | 0.45545077 | 1.26272838 |
| chr20 | 44295572 | 44332363 | 36792  | 2  | 3 | 0          | 0.03070643 | 0          | 6 | 4          | 0.63695542 | 1.26272838 |
| chr20 | 44332363 | 44335603 | 3241   | 2  | 3 | 1          | 0.01598258 | 0.01091641 | 7 | 4          | 0.84395715 | 0.76005302 |
| chr20 | 44335603 | 44377145 | 41543  | 2  | 3 | 1          | 0.03070643 | 0.01091641 | 6 | 4          | 0.63695542 | 0.76005302 |
| chr20 | 44377145 | 44377204 | 60     | 1  | 3 | 2          | 0.01598258 | 0.0429175  | 7 | 4          | 0.84395715 | 0.47744371 |
| chr20 | 44377204 | 44427603 | 50400  | 2  | 3 | 1          | 0.01598258 | 0.01091641 | 7 | 4          | 0.84395715 | 0.76005    |



|       |          |          |         |    |   |   |            |            |   |   |            |            |
|-------|----------|----------|---------|----|---|---|------------|------------|---|---|------------|------------|
| chr20 | 46402730 | 46505139 | 102410  | 1  | 1 | 1 | 0.1218695  | 0.05404976 | 1 | 2 | 0.1218695  | 0.30102999 |
| chr20 | 46505139 | 46691172 | 186034  | 2  | 1 | 1 | 0.1218695  | 0.02438896 | 1 | 3 | 0.1218695  | 0.51676182 |
| chr20 | 46691172 | 46691231 | 60      | 1  | 1 | 2 | 0.05404976 | 0.0429175  | 2 | 4 | 0.30102999 | 0.47744371 |
| chr20 | 46691231 | 46760428 | 69198   | 1  | 1 | 2 | 0.05404976 | 0.08289318 | 2 | 3 | 0.30102999 | 0.30102999 |
| chr20 | 46760428 | 46874875 | 114448  | 1  | 1 | 1 | 0.05404976 | 0.1218695  | 2 | 1 | 0.1218695  | 0.1218695  |
| chr20 | 46874875 | 46874934 | 60      | 1  | 1 | 1 | 0.02438896 | 0.1218695  | 3 | 1 | 0.51676182 | 0.1218695  |
| chr20 | 46874934 | 46993379 | 118446  | 1  | 0 | 1 | 0          | 0.1218695  | 2 | 1 | 0.61140001 | 0.1218695  |
| chr20 | 46993379 | 47213615 | 220237  | 3  | 0 | 1 | 0          | 0.05404976 | 2 | 2 | 0.61140001 | 0.30102999 |
| chr20 | 47213615 | 47266527 | 52913   | 4  | 1 | 1 | 0.01091641 | 0.05404976 | 4 | 2 | 0.76005302 | 0.30102999 |
| chr20 | 47266527 | 47352725 | 86199   | 2  | 1 | 0 | 0.01091641 | 0          | 4 | 2 | 0.76005302 | 0.61140001 |
| chr20 | 47352725 | 47455836 | 103112  | 3  | 1 | 1 | 0.01091641 | 0.05404976 | 4 | 2 | 0.76005302 | 0.30102999 |
| chr20 | 47455836 | 47538964 | 83129   | 1  | 1 | 1 | 0.01091641 | 0.30102999 | 4 | 0 | 0.76005302 | 0          |
| chr20 | 47538964 | 47588872 | 49909   | 2  | 1 | 1 | 0.00478973 | 0.30102999 | 5 | 0 | 1.02643191 | 0          |
| chr20 | 47588872 | 47588931 | 60      | 1  | 1 | 1 | 0.00478973 | 0.02438896 | 5 | 3 | 1.02643191 | 0.51676182 |
| chr20 | 47588931 | 47650130 | 61200   | 2  | 1 | 1 | 0.00478973 | 0.05404976 | 5 | 2 | 1.02643191 | 0.30102999 |
| chr20 | 47650130 | 47805837 | 155708  | 4  | 2 | 1 | 0.02162467 | 0.02438896 | 5 | 3 | 0.68214471 | 0.51676182 |
| chr20 | 47805837 | 47859055 | 53219   | 2  | 2 | 1 | 0.02162467 | 0.05404976 | 5 | 3 | 0.68214471 | 0.30102999 |
| chr20 | 47859055 | 48099500 | 240446  | 6  | 2 | 1 | 0.02162467 | 0.1218695  | 5 | 1 | 0.68214471 | 0.1218695  |
| chr20 | 48099500 | 48164240 | 64741   | 3  | 2 | 1 | 0.01053319 | 0.1218695  | 6 | 1 | 0.91219088 | 0.1218695  |
| chr20 | 48164240 | 48224608 | 60357   | 2  | 2 | 1 | 0.00221948 | 0.1218695  | 8 | 2 | 1.44210395 | 0.1218695  |
| chr20 | 48224608 | 48273085 | 48480   | 1  | 1 | 1 | 0.00221948 | 0.30102999 | 8 | 0 | 1.44210395 | 0          |
| chr20 | 48273085 | 48320472 | 47388   | 2  | 3 | 1 | 0.00221948 | 0.30102999 | 8 | 0 | 1.07548421 | 0          |
| chr20 | 48320472 | 48347672 | 27201   | 2  | 3 | 2 | 0.0079614  | 0.61140001 | 8 | 0 | 1.07548421 | 0          |
| chr20 | 48347672 | 48464041 | 116370  | 2  | 2 | 2 | 0.01598258 | 0.61140001 | 7 | 0 | 0.84395715 | 0          |
| chr20 | 48464041 | 48600352 | 136312  | 5  | 3 | 2 | 0.0079614  | 0.61140001 | 8 | 0 | 1.07548421 | 0          |
| chr20 | 48600352 | 48643325 | 42574   | 1  | 3 | 1 | 0.0079614  | 0.30102999 | 8 | 0 | 1.07548421 | 0          |
| chr20 | 48643325 | 48760812 | 117488  | 3  | 3 | 1 | 0.00378107 | 0.30102999 | 9 | 0 | 1.33111237 | 0          |
| chr20 | 48760812 | 48760871 | 60      | 1  | 3 | 2 | 0.00378107 | 0.61140001 | 9 | 0 | 1.33111237 | 0          |
| chr20 | 48760871 | 48861933 | 101063  | 4  | 3 | 1 | 0.0079614  | 0.30102999 | 9 | 0 | 1.07548421 | 0          |
| chr20 | 48861933 | 48861992 | 60      | 1  | 1 | 1 | 0.00378107 | 0.30102999 | 9 | 0 | 1.33111237 | 0          |
| chr20 | 48861992 | 49042110 | 180119  | 2  | 3 | 1 | 0.0079614  | 0.30102999 | 8 | 0 | 1.07548421 | 0          |
| chr20 | 49042110 | 49200044 | 157935  | 5  | 3 | 1 | 0.00378107 | 0.30102999 | 9 | 0 | 1.33111237 | 0          |
| chr20 | 49200044 | 49571808 | 371765  | 10 | 3 | 1 | 0.00378107 | 0.1218695  | 9 | 1 | 1.33111237 | 0.1218695  |
| chr20 | 49571808 | 49633890 | 62083   | 3  | 1 | 1 | 0.00378107 | 0.30102999 | 9 | 0 | 1.33111237 | 0          |
| chr20 | 49633890 | 49954748 | 320859  | 3  | 3 | 1 | 0.0079614  | 0.30102999 | 8 | 0 | 1.07548421 | 0          |
| chr20 | 49954748 | 50112183 | 157436  | 4  | 3 | 1 | 0.0079614  | 0.1218695  | 8 | 1 | 1.07548421 | 0.1218695  |
| chr20 | 50112183 | 50208375 | 96193   | 2  | 2 | 1 | 0.00221948 | 0.1218695  | 8 | 1 | 1.44210395 | 0.1218695  |
| chr20 | 50208375 | 50317833 | 109459  | 2  | 2 | 1 | 0.00493743 | 0.1218695  | 7 | 1 | 1.16581773 | 0.1218695  |
| chr20 | 50317833 | 50401273 | 83441   | 3  | 2 | 1 | 0.00221948 | 0.1218695  | 8 | 1 | 1.44210395 | 0.1218695  |
| chr20 | 50401273 | 50401329 | 57      | 1  | 2 | 1 | 0.00221948 | 0.05404976 | 8 | 2 | 1.44210395 | 0.30102999 |
| chr20 | 50401329 | 50789021 | 387693  | 6  | 2 | 1 | 0.00221948 | 0.1218695  | 8 | 1 | 1.44210395 | 0.1218695  |
| chr20 | 50789021 | 51003975 | 214955  | 3  | 2 | 1 | 0.00493743 | 0.1218695  | 7 | 1 | 1.16581773 | 0.1218695  |
| chr20 | 51003975 | 51094095 | 90121   | 1  | 2 | 1 | 0.01053319 | 0.1218695  | 6 | 1 | 0.91219088 | 0.1218695  |
| chr20 | 51094095 | 51094154 | 60      | 1  | 3 | 1 | 0.03070643 | 0.1218695  | 6 | 1 | 0.63695542 | 0.1218695  |
| chr20 | 51094154 | 51188162 | 94009   | 1  | 2 | 1 | 0.01053319 | 0.1218695  | 6 | 1 | 0.91219088 | 0.1218695  |
| chr20 | 51188162 | 51580168 | 392007  | 4  | 2 | 1 | 0.01053319 | 0          | 6 | 1 | 0.91219088 | 0.30102999 |
| chr20 | 51580168 | 51796514 | 216347  | 6  | 2 | 1 | 0.01053319 | 0.1218695  | 6 | 1 | 0.91219088 | 0.1218695  |
| chr20 | 51796514 | 52269459 | 472946  | 8  | 2 | 1 | 0.01053319 | 0.30102999 | 6 | 0 | 0.91219088 | 0          |
| chr20 | 52269459 | 52407459 | 138001  | 2  | 2 | 1 | 0.00493743 | 0.1218695  | 7 | 1 | 1.16581773 | 0.1218695  |
| chr20 | 52407459 | 52612403 | 204945  | 4  | 2 | 1 | 0.00493743 | 0.30102999 | 7 | 0 | 1.16581773 | 0          |
| chr20 | 52612403 | 52612462 | 60      | 1  | 3 | 1 | 0.01598258 | 0.30102999 | 7 | 0 | 0.84395715 | 0          |
| chr20 | 52612462 | 52645535 | 33074   | 1  | 2 | 1 | 0.00493743 | 0.30102999 | 7 | 0 | 1.16581773 | 0          |
| chr20 | 52645535 | 52968023 | 322489  | 6  | 2 | 0 | 0.00493743 | 0          | 7 | 0 | 1.16581773 | 0          |
| chr20 | 52968023 | 53492165 | 524143  | 8  | 2 | 1 | 0.00493743 | 0.1218695  | 7 | 1 | 1.16581773 | 0.1218695  |
| chr20 | 53492165 | 53612498 | 120334  | 3  | 2 | 1 | 0.01053319 | 0.1218695  | 6 | 1 | 0.91219088 | 0.1218695  |
| chr20 | 53612498 | 53911068 | 298571  | 1  | 2 | 1 | 0.02162467 | 0.1218695  | 5 | 1 | 0.68214471 | 0.1218695  |
| chr20 | 53911068 | 53911127 | 60      | 1  | 2 | 1 | 0.01053319 | 0.1218695  | 6 | 1 | 0.91219088 | 0.1218695  |
| chr20 | 53911127 | 54071292 | 160166  | 2  | 1 | 1 | 0.02162467 | 0.1218695  | 5 | 1 | 0.68214471 | 0.1218695  |
| chr20 | 54071292 | 54146226 | 74935   | 2  | 2 | 1 | 0.01053319 | 0.1218695  | 6 | 1 | 0.91219088 | 0.1218695  |
| chr20 | 54146226 | 54394785 | 248560  | 2  | 2 | 1 | 0.00493743 | 0.1218695  | 7 | 1 | 1.16581773 | 0.1218695  |
| chr20 | 54394785 | 54573666 | 178882  | 2  | 2 | 1 | 0.00221948 | 0.1218695  | 8 | 1 | 1.44210395 | 0.1218695  |
| chr20 | 54573666 | 54940027 | 366362  | 7  | 3 | 1 | 0.0079614  | 0.05404976 | 8 | 2 | 1.07548421 | 0.30102999 |
| chr20 | 54940027 | 55983143 | 1043117 | 24 | 3 | 1 | 0.0079614  | 0.02438896 | 8 | 3 | 1.07548421 | 0.51676182 |
| chr20 | 55983143 | 56194543 | 211401  | 3  | 1 | 1 | 0.0079614  | 0.05404976 | 8 | 2 | 1.07548421 | 0.30102999 |
| chr20 | 56194543 | 56400042 | 205500  | 4  | 1 | 1 | 0.0079614  | 0.02438896 | 8 | 3 | 1.07548421 | 0.51676182 |
| chr20 | 56400042 | 56401091 | 60      | 1  | 3 | 2 | 0.0079614  | 0.08289318 | 8 | 3 | 0.30102999 | 0.30102999 |
| chr20 | 56401091 | 56526225 | 126125  | 1  | 3 | 1 | 0.0079614  | 0.02438896 | 8 | 3 | 1.07548421 | 0.51676182 |
| chr20 | 56526225 | 56608719 | 82495   | 1  | 3 | 1 | 0.01598258 | 0.02438896 | 7 | 2 | 0.84395715 | 0.51676182 |
| chr20 | 56608719 | 56608778 | 60      | 1  | 3 | 2 | 0.01598258 | 0.0429175  | 7 | 4 | 0.84395715 | 0.47744371 |
| chr20 | 56608778 | 56728648 | 119871  | 1  | 3 | 2 | 0.01598258 | 0.08289318 | 7 | 3 | 0.84395715 | 0.30102999 |
| chr20 | 56728648 | 56728703 | 56      | 1  | 3 | 2 | 0.0079614  | 0.0429175  | 8 | 4 | 1.07548421 | 0.47744371 |
| chr20 | 56728703 | 56906744 | 178042  | 4  | 3 | 2 | 0.01598258 | 0.0429175  | 7 | 4 | 0.84395715 | 0.47744371 |
| chr20 | 56906744 | 57058486 | 151743  | 5  | 3 | 2 | 0.01598258 | 0.01091641 | 7 | 4 | 0.84395715 | 0.76005302 |
| chr20 | 57058486 | 57058545 | 60      | 1  | 3 | 2 | 0.01598258 | 0.0429175  | 7 | 4 | 0.84395715 | 0.47744371 |
| chr20 | 57058545 | 57078518 | 19974   | 1  | 3 | 1 | 0.01598258 | 0.01091641 | 7 | 4 | 0.84395715 | 0.76005302 |
| chr20 | 57078518 | 57130773 | 52256   | 3  | 1 | 1 | 0.01598258 | 0.02438896 | 7 | 3 | 0.84395715 | 0.51676182 |
| chr20 | 57130773 | 57210777 | 80005   | 3  | 4 | 1 | 0.03812622 | 0.02438896 | 7 | 3 | 0.60763643 | 0.51676182 |
| chr20 | 57210777 | 57230394 | 19618   | 1  | 3 | 1 | 0.01598258 | 0.02438896 | 7 | 3 | 0.84395715 | 0.51676182 |
| chr20 | 57230394 | 57275821 | 45428   | 4  | 3 | 2 | 0.01598258 | 0.08289318 | 7 | 3 | 0.84395715 | 0.30102999 |
| chr20 | 57275821 | 57275880 | 60      | 1  | 4 | 2 | 0.03812622 | 0.08289318 | 7 | 3 | 0.60763643 | 0.30102999 |
| chr20 | 57275880 | 57333733 | 57854   | 1  | 2 | 2 | 0.01598258 | 0.08289318 | 7 | 3 | 0.84395715 | 0.30102999 |
| chr20 | 57333733 | 57381251 | 47519   | 2  | 2 | 2 | 0.01598258 | 0.0429175  | 7 | 4 | 0.84395715 | 0.47744371 |
| chr20 | 57381251 | 57381310 | 60      | 1  | 4 | 2 | 0.03812622 | 0.0429175  | 7 | 4 | 0.60763643 | 0.47744371 |
| chr20 | 57381310 | 57575516 | 194207  | 6  | 4 | 2 | 0.03812622 | 0.08289318 | 7 | 3 | 0.60763643 | 0.30102999 |
| chr20 | 57575516 | 57606847 | 31332   | 3  | 4 | 2 | 0.03812622 | 0.1575501  | 7 | 2 | 0.60763643 | 0.1575501  |
| chr20 | 57606847 | 57649748 | 42902   | 3  | 2 | 2 | 0.01598258 | 0.1575501  | 7 | 2 | 0.84395715 | 0.1575501  |
| chr20 | 57649748 | 57820897 | 171150  | 4  | 3 | 2 | 0.01598258 | 0.08289318 | 7 | 3 | 0.84395715 | 0.30102999 |
| chr20 | 57820897 | 57891781 | 70885   | 1  | 2 | 2 | 0.00493743 | 0.08289318 | 7 | 3 | 1.16581773 | 0.30102999 |
| chr20 | 57891781 | 57896819 | 5039    | 2  | 3 | 2 | 0.01598258 | 0.08289318 | 7 | 3 | 0.84395715 | 0.30102999 |
| chr20 | 57896819 | 57925726 | 28908   | 1  | 3 | 2 | 0.03070643 | 0.08289318 | 6 | 3 | 0.63695542 | 0.30102999 |
| chr20 | 57925726 | 58042945 | 117220  | 1  | 3 | 2 | 0.03070643 | 0.1575501  | 6 | 2 | 0.63695542 | 0.1575501  |
| chr20 | 580      |          |         |    |   |   |            |            |   |   |            |            |

|       |          |          |        |    |    |   |            |            |   |   |            |            |
|-------|----------|----------|--------|----|----|---|------------|------------|---|---|------------|------------|
| chr20 | 60882235 | 60919387 | 37153  | 4  | 6  | 2 | 0.129913   | 0.02162467 | 7 | 5 | 0.30102999 | 0.68214471 |
| chr20 | 60919387 | 60985282 | 65896  | 2  | 6  | 2 | 0.08122616 | 0.01053319 | 8 | 6 | 0.4250187  | 0.91219088 |
| chr20 | 60985282 | 61001287 | 16006  | 2  | 7  | 2 | 0.13499366 | 0.01053319 | 8 | 6 | 0.30102999 | 0.91219088 |
| chr20 | 61001287 | 61044777 | 43491  | 3  | 7  | 3 | 0.13499366 | 0.03070643 | 8 | 6 | 0.30102999 | 0.63695542 |
| chr20 | 61044777 | 61142577 | 97801  | 1  | 7  | 2 | 0.13499366 | 0.01053319 | 8 | 6 | 0.30102999 | 0.91219088 |
| chr20 | 61142577 | 61153440 | 10864  | 2  | 8  | 2 | 0.20764654 | 0.01053319 | 8 | 6 | 0.20764654 | 0.91219088 |
| chr20 | 61153440 | 61172673 | 19234  | 1  | 8  | 2 | 0.20764654 | 0.02162467 | 8 | 5 | 0.20764654 | 0.68214471 |
| chr20 | 61172673 | 61272915 | 100243 | 1  | 8  | 1 | 0.20764654 | 0.00478973 | 8 | 5 | 0.20764654 | 1.02643191 |
| chr20 | 61272915 | 61299441 | 26527  | 2  | 9  | 2 | 0.30102999 | 0.01053319 | 8 | 6 | 0.13872638 | 0.91219088 |
| chr20 | 61299441 | 61299500 | 60     | 1  | 10 | 3 | 0.4167287  | 0.03070643 | 8 | 6 | 0.08923391 | 0.63695542 |
| chr20 | 61299500 | 61391919 | 92420  | 3  | 9  | 3 | 0.30102999 | 0.03070643 | 8 | 6 | 0.13872638 | 0.63695542 |
| chr20 | 61391919 | 61391974 | 56     | 1  | 10 | 3 | 0.4167287  | 0.03070643 | 8 | 6 | 0.08923391 | 0.63695542 |
| chr20 | 61391974 | 61472348 | 80375  | 3  | 9  | 2 | 0.30102999 | 0.01053319 | 8 | 6 | 0.13872638 | 0.91219088 |
| chr20 | 61472348 | 61599925 | 127578 | 8  | 10 | 2 | 0.4167287  | 0.01053319 | 8 | 6 | 0.08923391 | 0.91219088 |
| chr20 | 61599925 | 61665549 | 65625  | 1  | 10 | 2 | 0.4167287  | 0.02162467 | 8 | 5 | 0.08923391 | 0.68214471 |
| chr20 | 61665549 | 61704303 | 38755  | 2  | 11 | 2 | 0.55623409 | 0.02162467 | 8 | 5 | 0.05490675 | 0.68214471 |
| chr20 | 61704303 | 61758593 | 54291  | 1  | 10 | 2 | 0.4167287  | 0.02162467 | 8 | 5 | 0.08923391 | 0.68214471 |
| chr20 | 61758593 | 61758652 | 60     | 1  | 10 | 2 | 0.4167287  | 0.01053319 | 8 | 6 | 0.08923391 | 0.91219088 |
| chr20 | 61758652 | 61813095 | 54444  | 1  | 9  | 2 | 0.30102999 | 0.01053319 | 8 | 6 | 0.13872638 | 0.91219088 |
| chr20 | 61813095 | 61845191 | 32097  | 1  | 9  | 2 | 0.42015402 | 0.01053319 | 7 | 6 | 0.08584816 | 0.91219088 |
| chr20 | 61845191 | 61877165 | 31975  | 2  | 10 | 2 | 0.56314562 | 0.01053319 | 7 | 6 | 0.05232577 | 0.91219088 |
| chr20 | 61877165 | 62031819 | 15455  | 1  | 9  | 2 | 0.42015402 | 0.01053319 | 7 | 6 | 0.08584816 | 0.91219088 |
| chr20 | 62031819 | 62065010 | 33192  | 1  | 8  | 2 | 0.30102999 | 0.01053319 | 7 | 6 | 0.13499366 | 0.91219088 |
| chr20 | 62065010 | 62106464 | 41455  | 2  | 8  | 4 | 0.30102999 | 0.06713722 | 7 | 6 | 0.13499366 | 0.44141547 |
| chr20 | 62106464 | 62163473 | 57010  | 1  | 8  | 3 | 0.30102999 | 0.03070643 | 7 | 6 | 0.13499366 | 0.63695542 |
| chr20 | 62163473 | 62276641 | 113169 | 6  | 6  | 2 | 0.20064824 | 0.02162467 | 6 | 5 | 0.20064824 | 0.68214471 |
| chr20 | 62276641 | 62281707 | 5067   | 2  | 8  | 3 | 0.30102999 | 0.03070643 | 7 | 6 | 0.13499366 | 0.63695542 |
| chr20 | 62281707 | 62336104 | 54398  | 2  | 8  | 2 | 0.30102999 | 0.02162467 | 7 | 5 | 0.13499366 | 0.68214471 |
| chr20 | 62336104 | 62353706 | 17603  | 2  | 8  | 3 | 0.30102999 | 0.05670724 | 7 | 5 | 0.13499366 | 0.45545077 |
| chr20 | 62353706 | 62382463 | 28758  | 1  | 7  | 2 | 0.20469099 | 0.02162467 | 7 | 5 | 0.20469099 | 0.68214471 |
| chr20 | 62382463 | 62494619 | 112157 | 2  | 6  | 2 | 0.20064824 | 0.02162467 | 6 | 5 | 0.20064824 | 0.68214471 |
| chr20 | 62494619 | 62494669 | 51     | 1  | 7  | 2 | 0.30102999 | 0.02162467 | 6 | 5 | 0.129913   | 0.68214471 |
| chr20 | 62494669 | 62559987 | 65319  | 3  | 6  | 2 | 0.20064824 | 0.0429175  | 6 | 4 | 0.20064824 | 0.47744371 |
| chr20 | 62559987 | 62560046 | 60     | 1  | 6  | 2 | 0.20064824 | 0.02162467 | 6 | 5 | 0.20064824 | 0.68214471 |
| chr20 | 62560046 | 62571286 | 11241  | 1  | 5  | 2 | 0.12309572 | 0.02162467 | 6 | 5 | 0.30102999 | 0.68214471 |
| chr20 | 62571286 | 62608202 | 36917  | 2  | 4  | 2 | 0.06713722 | 0.02162467 | 6 | 5 | 0.44141547 | 0.68214471 |
| chr20 | 62608202 | 62664464 | 56263  | 4  | 6  | 2 | 0.20064824 | 0.02162467 | 6 | 5 | 0.20064824 | 0.68214471 |
| chr20 | 62664464 | 62743116 | 78653  | 6  | 4  | 2 | 0.06713722 | 0.02162467 | 6 | 5 | 0.44141547 | 0.68214471 |
| chr20 | 62743116 | 62850226 | 107111 | 3  | 3  | 2 | 0.03070643 | 0.0429175  | 6 | 4 | 0.63695542 | 0.47744371 |
| chr20 | 62850226 | 62872839 | 22614  | 3  | 4  | 2 | 0.06713722 | 0.0429175  | 6 | 4 | 0.44141547 | 0.47744371 |
| chr20 | 62872839 | 62893189 | 20351  | 1  | 3  | 2 | 0.03070643 | 0.0429175  | 6 | 4 | 0.63695542 | 0.47744371 |
| chr21 | 9832448  | 9834682  | 2235   | 18 | 0  | 7 | 0.0        | 0.08584816 | 1 | 9 | 0.30102999 | 0.42015402 |
| chr21 | 14640392 | 14795268 | 154877 | 2  | 0  | 0 | 0          | 0          | 1 | 0 | 0.30102999 | 0          |
| chr21 | 14795268 | 14861256 | 65989  | 2  | 0  | 0 | 0          | 0          | 2 | 0 | 0.61140001 | 0          |
| chr21 | 14861256 | 15170361 | 309106 | 5  | 1  | 0 | 0.05404976 | 0          | 2 | 0 | 0.30102999 | 0          |
| chr21 | 15170361 | 15372467 | 202107 | 2  | 0  | 2 | 0.1575501  | 0          | 2 | 1 | 0.1575501  | 0.30102999 |
| chr21 | 15372467 | 15372526 | 60     | 1  | 2  | 1 | 0.1575501  | 0.1218695  | 2 | 1 | 0.1575501  | 0.1218695  |
| chr21 | 15372526 | 15451032 | 78507  | 2  | 1  | 1 | 0.30102999 | 0.1218695  | 1 | 1 | 0.05404976 | 0.1218695  |
| chr21 | 15451032 | 15824290 | 373259 | 9  | 2  | 2 | 0.30102999 | 0.1575501  | 1 | 2 | 0.05404976 | 0.1575501  |
| chr21 | 15824290 | 15872955 | 48666  | 1  | 1  | 2 | 0.1218695  | 0.1575501  | 1 | 2 | 0.1218695  | 0.1575501  |
| chr21 | 15872955 | 15925793 | 52839  | 3  | 1  | 3 | 0.1218695  | 0.30102999 | 1 | 2 | 0.1218695  | 0.08289318 |
| chr21 | 15925793 | 16187111 | 261319 | 7  | 1  | 3 | 0.1218695  | 0.10122019 | 1 | 4 | 0.1218695  | 0.30102999 |
| chr21 | 16187111 | 16271796 | 84686  | 2  | 1  | 2 | 0.1218695  | 0.0429175  | 1 | 4 | 0.1218695  | 0.47744371 |
| chr21 | 16271796 | 16374020 | 102225 | 4  | 2  | 3 | 0.30102999 | 0.10122019 | 1 | 4 | 0.05404976 | 0.30102999 |
| chr21 | 16374020 | 16438458 | 64439  | 3  | 2  | 3 | 0.1575501  | 0.10122019 | 2 | 4 | 0.1575501  | 0.30102999 |
| chr21 | 16438458 | 16588489 | 150032 | 1  | 3  | 3 | 0.05404976 | 0.10122019 | 2 | 4 | 0.30102999 | 0.30102999 |
| chr21 | 16588489 | 16795087 | 206599 | 2  | 1  | 2 | 0.1218695  | 0.0429175  | 1 | 4 | 0.1218695  | 0.47744371 |
| chr21 | 16795087 | 16795146 | 60     | 1  | 2  | 2 | 0.30102999 | 0.0429175  | 1 | 4 | 0.05404976 | 0.47744371 |
| chr21 | 16795146 | 16855962 | 60817  | 1  | 1  | 1 | 0.1218695  | 0.0429175  | 1 | 4 | 0.1218695  | 0.47744371 |
| chr21 | 16855962 | 16920045 | 64084  | 2  | 1  | 3 | 0.05404976 | 0.10122019 | 2 | 4 | 0.30102999 | 0.30102999 |
| chr21 | 16920045 | 16992255 | 72211  | 1  | 1  | 3 | 0.05404976 | 0.17593012 | 2 | 3 | 0.30102999 | 0.17593012 |
| chr21 | 16992255 | 16992314 | 60     | 1  | 1  | 4 | 0.02438986 | 0.30102999 | 3 | 3 | 0.51676182 | 0.10122019 |
| chr21 | 16992314 | 17096314 | 104001 | 2  | 1  | 4 | 0.05404976 | 0.30102999 | 2 | 3 | 0.30102999 | 0.10122019 |
| chr21 | 17096314 | 17341721 | 245408 | 6  | 1  | 4 | 0.02438986 | 0.30102999 | 3 | 3 | 0.51676182 | 0.10122019 |
| chr21 | 17341721 | 17406112 | 64592  | 1  | 1  | 3 | 0.02438986 | 0.17593012 | 3 | 3 | 0.51676182 | 0.17593012 |
| chr21 | 17406112 | 17451673 | 45562  | 1  | 1  | 3 | 0.05404976 | 0.17593012 | 2 | 3 | 0.30102999 | 0.17593012 |
| chr21 | 17451673 | 17586194 | 134522 | 4  | 1  | 4 | 0.05404976 | 0.30102999 | 2 | 3 | 0.30102999 | 0.10122019 |
| chr21 | 17586194 | 17639720 | 53527  | 1  | 1  | 3 | 0.05404976 | 0.17593012 | 2 | 3 | 0.30102999 | 0.17593012 |
| chr21 | 17639720 | 17639779 | 60     | 1  | 2  | 3 | 0.1575501  | 0.17593012 | 2 | 3 | 0.1575501  | 0.17593012 |
| chr21 | 17639779 | 17723391 | 83613  | 2  | 2  | 3 | 0.30102999 | 0.17593012 | 1 | 3 | 0.05404976 | 0.17593012 |
| chr21 | 17723391 | 17800277 | 76887  | 1  | 1  | 3 | 0.1218695  | 0.17593012 | 1 | 1 | 0.1218695  | 0.17593012 |
| chr21 | 17800277 | 17800336 | 60     | 1  | 1  | 3 | 0.05404976 | 0.17593012 | 2 | 3 | 0.30102999 | 0.17593012 |
| chr21 | 17800336 | 17939023 | 138688 | 5  | 1  | 3 | 0.1218695  | 0.17593012 | 1 | 3 | 0.1218695  | 0.17593012 |
| chr21 | 17939023 | 17977641 | 38619  | 3  | 1  | 3 | 0.05404976 | 0.17593012 | 3 | 2 | 0.30102999 | 0.17593012 |
| chr21 | 17977641 | 18081105 | 103465 | 2  | 1  | 2 | 0.05404976 | 0.08289318 | 2 | 3 | 0.30102999 | 0.30102999 |
| chr21 | 18081105 | 18081164 | 60     | 1  | 1  | 2 | 0.00478973 | 0.08289318 | 5 | 3 | 1.02643191 | 0.30102999 |
| chr21 | 18081164 | 18125633 | 44470  | 1  | 1  | 2 | 0.05404976 | 0.08289318 | 2 | 3 | 0.30102999 | 0.30102999 |
| chr21 | 18125633 | 18223919 | 98287  | 1  | 1  | 1 | 0.05404976 | 0.02438986 | 3 | 3 | 0.30102999 | 0.51676182 |
| chr21 | 18223919 | 18282280 | 58362  | 2  | 1  | 1 | 0.02438986 | 0.02438986 | 3 | 3 | 0.51676182 | 0.51676182 |
| chr21 | 18282280 | 18386876 | 104597 | 1  | 1  | 1 | 0.02438986 | 0.05404976 | 3 | 2 | 0.51676182 | 0.30102999 |
| chr21 | 18386876 | 18386935 | 60     | 1  | 1  | 2 | 0.02438986 | 0.1575501  | 3 | 2 | 0.51676182 | 0.1575501  |
| chr21 | 18386935 | 18679576 | 292642 | 3  | 1  | 2 | 0.05404976 | 0.1575501  | 2 | 2 | 0.30102999 | 0.1575501  |
| chr21 | 18679576 | 18679635 | 60     | 1  | 1  | 2 | 0.01091641 | 0.1575501  | 4 | 2 | 0.76005302 | 0.1575501  |
| chr21 | 18679635 | 18867614 | 187980 | 4  | 1  | 2 | 0.05404976 | 0.1575501  | 2 | 2 | 0.30102999 | 0.1575501  |
| chr21 | 18867614 | 18895240 | 27627  | 1  | 1  | 2 | 0.05404976 | 0.05404976 | 2 | 2 | 0.30102999 | 0.30102999 |
| chr21 | 18895240 | 18895299 | 60     | 1  | 1  | 1 | 0.02438986 | 0.05404976 | 3 | 2 | 0.51676182 | 0.30102999 |
| chr21 | 18895299 | 19036035 | 140737 | 5  | 1  | 2 | 0.05404976 | 0.05404976 | 2 | 2 | 0.30102999 | 0.30102999 |
| chr21 | 19036035 | 19183854 | 147820 | 2  | 1  | 1 | 0.1218695  | 0.05404976 | 1 | 2 | 0.1218695  | 0.30102999 |
| chr21 | 19183854 | 19372959 | 189106 | 6  | 1  | 1 | 0.05404976 | 0.05404976 | 2 | 2 | 0.30102999 | 0.30102999 |
| chr21 | 19372959 | 19577304 | 204346 | 5  | 2  | 0 | 0.1575501  | 0.05404976 | 2 | 2 | 0.1575501  | 0.30102999 |

|       |          |          |        |    |   |   |            |            |   |   |            |            |
|-------|----------|----------|--------|----|---|---|------------|------------|---|---|------------|------------|
| chr21 | 22847493 | 22911661 | 64169  | 4  | 2 | 3 | 0.02162467 | 0.17593012 | 5 | 3 | 0.68214471 | 0.17593012 |
| chr21 | 22911661 | 22977677 | 66017  | 1  | 2 | 3 | 0.08289318 | 0.17593012 | 3 | 3 | 0.30102999 | 0.17593012 |
| chr21 | 22977677 | 23127142 | 149466 | 2  | 2 | 2 | 0.08289318 | 0.08289318 | 3 | 3 | 0.30102999 | 0.30102999 |
| chr21 | 23127142 | 23127201 | 60     | 1  | 2 | 2 | 0.0429175  | 0.08289318 | 4 | 3 | 0.47744371 | 0.30102999 |
| chr21 | 23127201 | 23230528 | 10328  | 1  | 2 | 2 | 0.08289318 | 0.08289318 | 3 | 3 | 0.30102999 | 0.30102999 |
| chr21 | 23230528 | 23277776 | 97249  | 2  | 3 | 3 | 0.08289318 | 0.17593012 | 3 | 3 | 0.30102999 | 0.17593012 |
| chr21 | 23277776 | 23516266 | 188491 | 4  | 2 | 2 | 0.08289318 | 0.08289318 | 3 | 3 | 0.30102999 | 0.30102999 |
| chr21 | 23516266 | 23565601 | 49336  | 1  | 2 | 3 | 0.08289318 | 0.17593012 | 3 | 3 | 0.30102999 | 0.17593012 |
| chr21 | 23565601 | 23595873 | 30273  | 2  | 2 | 2 | 0.1575501  | 0.08289318 | 2 | 3 | 0.1575501  | 0.30102999 |
| chr21 | 23595873 | 23595932 | 60     | 1  | 2 | 3 | 0.1575501  | 0.17593012 | 2 | 3 | 0.1575501  | 0.17593012 |
| chr21 | 23595932 | 23685575 | 89644  | 1  | 2 | 2 | 0.1575501  | 0.08289318 | 2 | 3 | 0.1575501  | 0.30102999 |
| chr21 | 23685575 | 23785639 | 100065 | 2  | 2 | 2 | 0.08289318 | 0.0429175  | 3 | 4 | 0.30102999 | 0.47744371 |
| chr21 | 23785639 | 24008892 | 223254 | 2  | 2 | 2 | 0.30102999 | 0.61140001 | 1 | 0 | 0.05404976 | 0.30102999 |
| chr21 | 24008892 | 24131296 | 122405 | 1  | 1 | 1 | 0.1218695  | 0.30102999 | 1 | 0 | 0.1218695  | 0.30102999 |
| chr21 | 24131296 | 24273103 | 141808 | 2  | 1 | 1 | 0.05404976 | 0.30102999 | 2 | 0 | 0.30102999 | 0.30102999 |
| chr21 | 24273103 | 24339592 | 66490  | 2  | 2 | 1 | 0.1575501  | 0.30102999 | 2 | 0 | 0.1575501  | 0.30102999 |
| chr21 | 24339592 | 24811830 | 472239 | 8  | 2 | 1 | 0.08289318 | 0.30102999 | 3 | 0 | 0.30102999 | 0.30102999 |
| chr21 | 24811830 | 24811889 | 60     | 1  | 2 | 2 | 0.08289318 | 0.30102999 | 3 | 1 | 0.30102999 | 0.05404976 |
| chr21 | 24811889 | 25064425 | 252537 | 3  | 2 | 1 | 0.08289318 | 0.1218695  | 3 | 1 | 0.30102999 | 0.1218695  |
| chr21 | 25064425 | 25203824 | 139400 | 3  | 2 | 2 | 0.08289318 | 0.30102999 | 3 | 1 | 0.30102999 | 0.05404976 |
| chr21 | 25203824 | 25441714 | 237991 | 2  | 2 | 1 | 0.08289318 | 0.30102999 | 3 | 0 | 0.30102999 | 0.30102999 |
| chr21 | 25441714 | 25534271 | 92558  | 2  | 2 | 1 | 0.08289318 | 0.61140001 | 3 | 0 | 0.30102999 | 0.30102999 |
| chr21 | 25534271 | 25817275 | 283005 | 2  | 2 | 1 | 0.08289318 | 0.30102999 | 3 | 0 | 0.30102999 | 0.30102999 |
| chr21 | 25817275 | 26125905 | 308631 | 6  | 2 | 2 | 0.08289318 | 0.30102999 | 3 | 1 | 0.30102999 | 0.05404976 |
| chr21 | 26125905 | 26255403 | 129499 | 1  | 2 | 3 | 0.0429175  | 0.30102999 | 4 | 2 | 0.47744371 | 0.08289318 |
| chr21 | 26255403 | 26315375 | 59973  | 1  | 2 | 3 | 0.08289318 | 0.30102999 | 2 | 2 | 0.30102999 | 0.08289318 |
| chr21 | 26315375 | 26386800 | 71426  | 2  | 2 | 3 | 0.08289318 | 0.17593012 | 3 | 3 | 0.30102999 | 0.17593012 |
| chr21 | 26386800 | 26458747 | 71948  | 2  | 2 | 3 | 0.02162467 | 0.17593012 | 5 | 3 | 0.68214471 | 0.17593012 |
| chr21 | 26458747 | 26596163 | 137417 | 1  | 2 | 3 | 0.02162467 | 0.30102999 | 5 | 2 | 0.68214471 | 0.08289318 |
| chr21 | 26596163 | 26796939 | 200777 | 5  | 2 | 4 | 0.01053319 | 0.47744371 | 6 | 2 | 0.91219088 | 0.0429175  |
| chr21 | 26796939 | 26827918 | 30980  | 1  | 2 | 4 | 0.0429175  | 0.47744371 | 2 | 2 | 0.47744371 | 0.0429175  |
| chr21 | 26827918 | 26906429 | 78512  | 1  | 2 | 5 | 0.0429175  | 0.68214471 | 4 | 2 | 0.47744371 | 0.02162467 |
| chr21 | 26906429 | 26906488 | 60     | 1  | 2 | 6 | 0.01053319 | 0.91219088 | 6 | 2 | 0.91219088 | 0.01053319 |
| chr21 | 26906488 | 26975984 | 69497  | 3  | 2 | 6 | 0.02162467 | 0.91219088 | 5 | 2 | 0.68214471 | 0.01053319 |
| chr21 | 26975984 | 27269816 | 293833 | 6  | 2 | 5 | 0.02162467 | 0.68214471 | 5 | 2 | 0.68214471 | 0.02162467 |
| chr21 | 27269816 | 27333157 | 63342  | 2  | 2 | 6 | 0.02162467 | 0.91219088 | 5 | 2 | 0.68214471 | 0.01053319 |
| chr21 | 27333157 | 27411143 | 77987  | 2  | 2 | 6 | 0.0429175  | 0.91219088 | 4 | 2 | 0.47744371 | 0.01053319 |
| chr21 | 27411143 | 27411202 | 60     | 1  | 2 | 6 | 0.02162467 | 0.91219088 | 5 | 2 | 0.68214471 | 0.01053319 |
| chr21 | 27411202 | 27494356 | 83155  | 2  | 2 | 5 | 0.02162467 | 0.68214471 | 5 | 2 | 0.68214471 | 0.02162467 |
| chr21 | 27494356 | 27518295 | 23940  | 2  | 2 | 6 | 0.01053319 | 0.91219088 | 2 | 2 | 0.91219088 | 0.01053319 |
| chr21 | 27518295 | 27625335 | 107041 | 2  | 2 | 4 | 0.01053319 | 0.47744371 | 6 | 2 | 0.91219088 | 0.0429175  |
| chr21 | 27625335 | 27942108 | 316774 | 6  | 2 | 5 | 0.01053319 | 0.68214471 | 6 | 2 | 0.91219088 | 0.02162467 |
| chr21 | 27942108 | 27980388 | 38281  | 1  | 2 | 4 | 0.01053319 | 0.76005302 | 6 | 1 | 0.91219088 | 0.01091641 |
| chr21 | 27980388 | 28122073 | 141686 | 1  | 2 | 4 | 0.0429175  | 0.93173516 | 4 | 0 | 0.47744371 | 0.0429175  |
| chr21 | 28122073 | 28212572 | 90500  | 1  | 2 | 2 | 0.0429175  | 0.61140001 | 4 | 0 | 0.47744371 | 0.0429175  |
| chr21 | 28212572 | 28212631 | 60     | 1  | 2 | 2 | 0.01053319 | 0.61140001 | 6 | 0 | 0.91219088 | 0.0429175  |
| chr21 | 28212631 | 28315779 | 103149 | 2  | 1 | 1 | 0.01053319 | 0.30102999 | 6 | 0 | 0.91219088 | 0.0429175  |
| chr21 | 28315779 | 28315834 | 56     | 1  | 2 | 1 | 0.01053319 | 0.61140001 | 6 | 0 | 0.91219088 | 0.0429175  |
| chr21 | 28315834 | 28379185 | 63352  | 1  | 2 | 1 | 0.01053319 | 0.30102999 | 6 | 0 | 0.91219088 | 0.0429175  |
| chr21 | 28379185 | 28814199 | 435015 | 6  | 2 | 1 | 0.0429175  | 0.30102999 | 4 | 0 | 0.47744371 | 0.0429175  |
| chr21 | 28814199 | 28983735 | 169537 | 3  | 2 | 1 | 0.0429175  | 0.1218695  | 4 | 1 | 0.47744371 | 0.1218695  |
| chr21 | 28983735 | 29158363 | 174629 | 3  | 2 | 2 | 0.0429175  | 0.30102999 | 4 | 1 | 0.47744371 | 0.05404976 |
| chr21 | 29158363 | 29387463 | 229101 | 2  | 2 | 2 | 0.1575501  | 0.30102999 | 2 | 1 | 0.1575501  | 0.05404976 |
| chr21 | 29387463 | 29387522 | 60     | 1  | 2 | 2 | 0.08289318 | 0.30102999 | 3 | 1 | 0.30102999 | 0.05404976 |
| chr21 | 29387522 | 29546076 | 158555 | 3  | 2 | 2 | 0.1575501  | 0.30102999 | 2 | 1 | 0.1575501  | 0.05404976 |
| chr21 | 29546076 | 29546135 | 60     | 1  | 2 | 4 | 0.1575501  | 0.47744371 | 2 | 2 | 0.1575501  | 0.0429175  |
| chr21 | 29546135 | 29724927 | 178793 | 2  | 2 | 3 | 0.1575501  | 0.30102999 | 2 | 2 | 0.1575501  | 0.08289318 |
| chr21 | 29724927 | 29802561 | 77635  | 2  | 2 | 5 | 0.08289318 | 0.45545077 | 3 | 3 | 0.30102999 | 0.05670724 |
| chr21 | 29802561 | 29967276 | 164716 | 1  | 2 | 5 | 0.1575501  | 0.45545077 | 2 | 3 | 0.1575501  | 0.05670724 |
| chr21 | 29967276 | 30026612 | 59337  | 3  | 2 | 4 | 0.1575501  | 0.30102999 | 2 | 2 | 0.1575501  | 0.10122019 |
| chr21 | 30026612 | 30257058 | 230447 | 3  | 2 | 4 | 0.1575501  | 0.47744371 | 2 | 2 | 0.1575501  | 0.0429175  |
| chr21 | 30257058 | 30530843 | 273786 | 10 | 2 | 4 | 0.1575501  | 0.30102999 | 2 | 2 | 0.1575501  | 0.10122019 |
| chr21 | 30530843 | 30566530 | 35688  | 6  | 1 | 2 | 0.1575501  | 0.45545077 | 2 | 2 | 0.1575501  | 0.05670724 |
| chr21 | 30566530 | 30566589 | 60     | 1  | 2 | 5 | 0.1575501  | 0.30102999 | 2 | 4 | 0.1575501  | 0.11390336 |
| chr21 | 30566589 | 30660221 | 93633  | 2  | 2 | 2 | 0.1575501  | 0.35545077 | 2 | 3 | 0.1575501  | 0.05670724 |
| chr21 | 30660221 | 30656080 | 60     | 1  | 2 | 6 | 0.1575501  | 0.44141547 | 2 | 4 | 0.1575501  | 0.06713722 |
| chr21 | 30656080 | 30698438 | 38149  | 1  | 2 | 5 | 0.1575501  | 0.30102999 | 2 | 5 | 0.1575501  | 0.11390336 |
| chr21 | 30698438 | 30741397 | 42970  | 1  | 2 | 5 | 0.1575501  | 0.45545077 | 2 | 3 | 0.1575501  | 0.05670724 |
| chr21 | 30741397 | 30853223 | 111827 | 2  | 2 | 6 | 0.1575501  | 0.63695542 | 2 | 3 | 0.1575501  | 0.03070643 |
| chr21 | 30853223 | 30853282 | 60     | 1  | 2 | 6 | 0.1575501  | 0.44141547 | 2 | 4 | 0.1575501  | 0.06713722 |
| chr21 | 30853282 | 30925909 | 72628  | 1  | 2 | 2 | 0.1575501  | 0.30102999 | 2 | 2 | 0.1575501  | 0.11390336 |
| chr21 | 30925909 | 30969839 | 43931  | 2  | 2 | 5 | 0.08289318 | 0.30102999 | 3 | 4 | 0.30102999 | 0.11390336 |
| chr21 | 30969839 | 30976611 | 6773   | 1  | 2 | 5 | 0.02162467 | 0.30102999 | 5 | 4 | 0.68214471 | 0.11390336 |
| chr21 | 30976611 | 31131068 | 154458 | 4  | 2 | 5 | 0.08289318 | 0.30102999 | 3 | 4 | 0.30102999 | 0.11390336 |
| chr21 | 31131068 | 31174955 | 43888  | 2  | 2 | 5 | 0.0429175  | 0.30102999 | 4 | 4 | 0.47744371 | 0.11390336 |
| chr21 | 31174955 | 31270211 | 95257  | 3  | 2 | 6 | 0.02162467 | 0.44141547 | 5 | 4 | 0.68214471 | 0.06713722 |
| chr21 | 31270211 | 31333452 | 63242  | 3  | 2 | 7 | 0.02162467 | 0.43181735 | 5 | 5 | 0.68214471 | 0.07511598 |
| chr21 | 31333452 | 31632529 | 299078 | 5  | 1 | 7 | 0.01091641 | 0.43181735 | 4 | 5 | 0.76005302 | 0.07511598 |
| chr21 | 31632529 | 31719982 | 87454  | 3  | 1 | 6 | 0.01091641 | 0.30102999 | 4 | 5 | 0.76005302 | 0.12309572 |
| chr21 | 31719982 | 31860736 | 140755 | 6  | 1 | 5 | 0.01091641 | 0.19510895 | 4 | 5 | 0.76005302 | 0.19510895 |
| chr21 | 31860736 | 31962481 | 101746 | 6  | 1 | 5 | 0.00478973 | 0.19510895 | 5 | 5 | 1.02643191 | 0.19510895 |
| chr21 | 31962481 | 31988739 | 26259  | 2  | 1 | 5 | 0.00478973 | 0.12309572 | 5 | 6 | 1.02643191 | 0.30102999 |
| chr21 | 31988739 | 31988798 | 60     | 1  | 2 | 6 | 0.00478973 | 0.20064824 | 5 | 6 | 1.02643191 | 0.20064824 |
| chr21 | 31988798 | 32007240 | 18443  | 1  | 1 | 5 | 0.01091641 | 0.19510895 | 4 | 5 | 0.76005302 | 0.19510895 |
| chr21 | 32007240 | 32092337 | 85098  | 1  | 1 | 5 | 0.02438896 | 0.19510895 | 3 | 5 | 0.51676182 | 0.19510895 |
| chr21 | 32092337 | 32253224 | 160888 | 9  | 1 | 6 | 0.01091641 | 0.30102999 | 4 | 5 | 0.76005302 | 0.12309572 |
| chr21 | 32253224 | 32524994 | 271771 | 4  | 1 | 5 | 0.02438896 | 0.19510895 | 3 | 5 | 0.51676182 | 0.19510895 |
| chr21 | 32524994 | 32525053 | 60     | 1  | 1 | 6 | 0.02438896 | 0.129913   | 3 | 7 | 0.51676182 | 0.30102999 |
| chr21 | 32525053 | 32598015 | 72963  | 2  | 1 | 6 | 0.02438896 | 0.20064824 | 3 | 6 | 0.51676182 | 0.20064824 |
| chr21 | 32598015 | 32711701 | 113687 | 4  |   |   |            |            |   |   |            |            |

|       |          |          |        |    |   |   |            |            |            |   |            |            |            |
|-------|----------|----------|--------|----|---|---|------------|------------|------------|---|------------|------------|------------|
| chr21 | 35853320 | 35853379 | 60     | 1  | 1 | 6 | 0.00478973 | 0.30102999 | 5          | 5 | 1.02643191 | 0.12309572 |            |
| chr21 | 35853379 | 35888993 | 35615  | 1  | 1 | 5 | 0.00478973 | 0.19510895 | 5          | 5 | 1.02643191 | 0.19510895 |            |
| chr21 | 35888993 | 35966043 | 77051  | 2  | 1 | 5 | 0.02438896 | 0.30102999 | 3          | 4 | 0.51676182 | 0.11390336 |            |
| chr21 | 35966043 | 36011732 | 45690  | 3  | 1 | 5 | 0.01091641 | 0.30102999 | 4          | 4 | 0.76005302 | 0.11390336 |            |
| chr21 | 36011732 | 36069130 | 57399  | 2  | 1 | 4 | 0.02438896 | 0.18734596 | 3          | 4 | 0.51676182 | 0.18734596 |            |
| chr21 | 36069130 | 36118153 | 49024  | 3  | 1 | 5 | 0.02438896 | 0.30102999 | 3          | 4 | 0.51676182 | 0.11390336 |            |
| chr21 | 36118153 | 36162250 | 44098  | 2  | 1 | 5 | 0.02438896 | 0.12309572 | 3          | 6 | 0.51676182 | 0.30102999 |            |
| chr21 | 36162250 | 36196207 | 33958  | 2  | 1 | 5 | 0.01091641 | 0.12309572 | 4          | 6 | 0.76005302 | 0.30102999 |            |
| chr21 | 36196207 | 36201622 | 5416   | 2  | 1 | 5 | 0.00478973 | 0.12309572 | 5          | 6 | 1.02643191 | 0.30102999 |            |
| chr21 | 36201622 | 36289849 | 88228  | 2  | 1 | 4 | 0.01091641 | 0.06713722 | 4          | 6 | 0.76005302 | 0.44141547 |            |
| chr21 | 36289849 | 36289908 | 60     | 1  | 1 | 4 | 0.00478973 | 0.06713722 | 5          | 6 | 1.02643191 | 0.44141547 |            |
| chr21 | 36289908 | 36366449 | 76542  | 2  | 1 | 4 | 0.01091641 | 0.06713722 | 4          | 6 | 0.76005302 | 0.44141547 |            |
| chr21 | 36366449 | 36491731 | 125283 | 2  | 1 | 4 | 0.01091641 | 0.11390336 | 4          | 5 | 0.76005302 | 0.30102999 |            |
| chr21 | 36491731 | 36708148 | 216418 | 4  | 1 | 4 | 0.01091641 | 0.06713722 | 4          | 6 | 0.76005302 | 0.44141547 |            |
| chr21 | 36708148 | 36774743 | 66596  | 4  | 1 | 4 | 0.00478973 | 0.06713722 | 5          | 6 | 1.02643191 | 0.44141547 |            |
| chr21 | 36774743 | 36774802 | 60     | 1  | 1 | 5 | 0.00478973 | 0.12309572 | 5          | 6 | 1.02643191 | 0.30102999 |            |
| chr21 | 36774802 | 36857577 | 82776  | 2  | 1 | 5 | 0.00478973 | 0.19510895 | 5          | 5 | 1.02643191 | 0.19510895 |            |
| chr21 | 36857577 | 36901835 | 44259  | 2  | 1 | 5 | 0.00204627 | 0.19510895 | 6          | 5 | 1.31360226 | 0.19510895 |            |
| chr21 | 36901835 | 37062929 | 161095 | 2  | 1 | 4 | 0.00478973 | 0.11390336 | 5          | 5 | 1.02643191 | 0.30102999 |            |
| chr21 | 37062929 | 37062988 | 60     | 1  | 1 | 5 | 0.00478973 | 0.19510895 | 5          | 5 | 1.02643191 | 0.19510895 |            |
| chr21 | 37062988 | 37106031 | 43044  | 3  | 1 | 5 | 0.01091641 | 0.19510895 | 4          | 5 | 0.76005302 | 0.19510895 |            |
| chr21 | 37106031 | 37234957 | 128927 | 3  | 1 | 4 | 0.01091641 | 0.11390336 | 4          | 6 | 0.76005302 | 0.30102999 |            |
| chr21 | 37234957 | 37235016 | 60     | 1  | 1 | 4 | 0.00204627 | 0.11390336 | 6          | 5 | 1.31360226 | 0.30102999 |            |
| chr21 | 37235016 | 37307848 | 72833  | 1  | 1 | 3 | 0.01091641 | 0.05670724 | 4          | 4 | 0.76005302 | 0.45545077 |            |
| chr21 | 37307848 | 37376620 | 68773  | 2  | 1 | 3 | 0.00478973 | 0.05670724 | 5          | 5 | 1.02643191 | 0.45545077 |            |
| chr21 | 37376620 | 37376679 | 60     | 1  | 1 | 4 | 0.00478973 | 0.06713722 | 5          | 6 | 1.02643191 | 0.44141547 |            |
| chr21 | 37376679 | 37408252 | 31574  | 1  | 1 | 4 | 0.01091641 | 0.06713722 | 4          | 6 | 0.76005302 | 0.44141547 |            |
| chr21 | 37408252 | 37493865 | 85614  | 3  | 1 | 5 | 0.01091641 | 0.12309572 | 4          | 4 | 0.76005302 | 0.30102999 |            |
| chr21 | 37493865 | 37518332 | 24468  | 2  | 1 | 5 | 0.00478973 | 0.12309572 | 5          | 6 | 1.02643191 | 0.30102999 |            |
| chr21 | 37518332 | 37518391 | 60     | 1  | 1 | 5 | 8.47E-04   | 0.12309572 | 7          | 6 | 1.62048027 | 0.30102999 |            |
| chr21 | 37518391 | 37665937 | 147547 | 4  | 1 | 5 | 0.00204627 | 0.12309572 | 6          | 6 | 1.31360226 | 0.30102999 |            |
| chr21 | 37665937 | 37692139 | 26203  | 2  | 1 | 5 | 8.47E-04   | 0.12309572 | 7          | 6 | 1.62048027 | 0.30102999 |            |
| chr21 | 37692139 | 37763830 | 71692  | 2  | 1 | 5 | 0.00204627 | 0.19510895 | 6          | 5 | 1.31360226 | 0.19510895 |            |
| chr21 | 37763830 | 37763880 | 51     | 1  | 1 | 5 | 8.47E-04   | 0.12309572 | 7          | 6 | 1.62048027 | 0.30102999 |            |
| chr21 | 37763880 | 37954808 | 190929 | 5  | 1 | 5 | 8.47E-04   | 0.19510895 | 7          | 5 | 1.62048027 | 0.19510895 |            |
| chr21 | 37954808 | 38076707 | 121900 | 2  | 1 | 4 | 8.47E-04   | 0.18734596 | 7          | 4 | 1.62048027 | 0.18734596 |            |
| chr21 | 38076707 | 38125435 | 48729  | 1  | 1 | 3 | 8.47E-04   | 0.17593012 | 7          | 3 | 1.62048027 | 0.17593012 |            |
| chr21 | 38125435 | 38198069 | 72635  | 1  | 1 | 3 | 8.47E-04   | 0.30102999 | 7          | 2 | 1.62048027 | 0.08289318 |            |
| chr21 | 38198069 | 38198128 | 60     | 1  | 1 | 2 | 4          | 0.00493743 | 0.47744371 | 7 | 2          | 1.16581773 | 0.0429175  |
| chr21 | 38198128 | 38269298 | 71171  | 1  | 1 | 4 | 0.00204627 | 0.47744371 | 6          | 2 | 1.31360226 | 0.0429175  |            |
| chr21 | 38269298 | 38302639 | 33342  | 2  | 1 | 4 | 8.47E-04   | 0.47744371 | 7          | 2 | 1.62048027 | 0.0429175  |            |
| chr21 | 38302639 | 38302698 | 60     | 1  | 1 | 2 | 4          | 0.00493743 | 0.47744371 | 7 | 2          | 1.16581773 | 0.0429175  |
| chr21 | 38302698 | 38334436 | 31739  | 1  | 1 | 2 | 3          | 0.00493743 | 0.30102999 | 7 | 2          | 1.16581773 | 0.08289318 |
| chr21 | 38334436 | 38385885 | 51450  | 2  | 1 | 2 | 5          | 0.00221948 | 0.30102999 | 8 | 2          | 1.44210395 | 0.08289318 |
| chr21 | 38385885 | 38385940 | 56     | 1  | 1 | 4 | 0.00221948 | 0.47744371 | 8          | 2 | 1.44210395 | 0.0429175  |            |
| chr21 | 38385940 | 38495020 | 109081 | 3  | 1 | 2 | 4          | 0.01053319 | 0.47744371 | 6 | 2          | 0.91219088 | 0.0429175  |
| chr21 | 38495020 | 38495079 | 60     | 1  | 1 | 2 | 4          | 0.01053319 | 0.30102999 | 6 | 3          | 0.91219088 | 0.10122019 |
| chr21 | 38495079 | 38528931 | 33853  | 1  | 1 | 2 | 4          | 0.02162467 | 0.30102999 | 5 | 3          | 0.68214471 | 0.10122019 |
| chr21 | 38528931 | 38571127 | 42197  | 2  | 1 | 5 | 0.02162467 | 0.30102999 | 5          | 4 | 0.68214471 | 0.11390336 |            |
| chr21 | 38571127 | 38608455 | 37329  | 1  | 1 | 2 | 5          | 0.02162467 | 0.45545077 | 3 | 3          | 0.68214471 | 0.05670724 |
| chr21 | 38608455 | 38638701 | 30247  | 2  | 1 | 5 | 0.01053319 | 0.45545077 | 6          | 3 | 0.91219088 | 0.05670724 |            |
| chr21 | 38638701 | 38755168 | 116468 | 2  | 1 | 5 | 0.00478973 | 0.45545077 | 5          | 3 | 1.02643191 | 0.05670724 |            |
| chr21 | 38755168 | 38791630 | 36463  | 1  | 1 | 5 | 0.00204627 | 0.45545077 | 6          | 3 | 1.31360226 | 0.05670724 |            |
| chr21 | 38791630 | 38885762 | 94133  | 2  | 1 | 5 | 0.00478973 | 0.68214471 | 5          | 2 | 1.02643191 | 0.02162467 |            |
| chr21 | 38885762 | 38997273 | 111512 | 2  | 1 | 5 | 0.00204627 | 0.45545077 | 6          | 3 | 1.31360226 | 0.05670724 |            |
| chr21 | 38997273 | 38997332 | 60     | 1  | 1 | 6 | 0.00204627 | 0.63695542 | 6          | 3 | 1.31360226 | 0.03070643 |            |
| chr21 | 38997332 | 39041989 | 44658  | 1  | 1 | 6 | 0.01091641 | 0.63695542 | 4          | 3 | 0.76005302 | 0.03070643 |            |
| chr21 | 39041989 | 39126612 | 84624  | 2  | 1 | 5 | 0.01091641 | 0.45545077 | 4          | 3 | 0.76005302 | 0.05670724 |            |
| chr21 | 39126612 | 39288591 | 161980 | 5  | 1 | 5 | 0.01091641 | 0.30102999 | 4          | 4 | 0.76005302 | 0.11390336 |            |
| chr21 | 39288591 | 39655123 | 366533 | 13 | 2 | 5 | 0.0429175  | 0.30102999 | 4          | 4 | 0.7744371  | 0.11390336 |            |
| chr21 | 39655123 | 39694292 | 39170  | 1  | 1 | 5 | 0.01091641 | 0.30102999 | 4          | 4 | 0.76005302 | 0.11390336 |            |
| chr21 | 39694292 | 39956370 | 262079 | 7  | 1 | 4 | 0.01091641 | 0.19510895 | 4          | 5 | 0.76005302 | 0.19510895 |            |
| chr21 | 39956370 | 39992487 | 36118  | 1  | 1 | 5 | 0.01091641 | 0.30102999 | 4          | 4 | 0.76005302 | 0.11390336 |            |
| chr21 | 39992487 | 39992546 | 60     | 1  | 1 | 5 | 0.00478973 | 0.30102999 | 5          | 4 | 1.02643191 | 0.11390336 |            |
| chr21 | 39992546 | 40037973 | 45428  | 1  | 1 | 5 | 0.00478973 | 0.30102999 | 5          | 3 | 1.02643191 | 0.05670724 |            |
| chr21 | 40037973 | 40114248 | 76276  | 2  | 1 | 5 | 0.00478973 | 0.45545077 | 5          | 4 | 1.02643191 | 0.05670724 |            |
| chr21 | 40114248 | 40114307 | 60     | 1  | 1 | 5 | 0.00478973 | 0.19510895 | 5          | 4 | 1.02643191 | 0.19510895 |            |
| chr21 | 40114307 | 40176486 | 62180  | 1  | 1 | 5 | 0.01091641 | 0.19510895 | 4          | 4 | 0.76005302 | 0.19510895 |            |
| chr21 | 40176486 | 40185000 | 8515   | 2  | 1 | 6 | 0.01091641 | 0.30102999 | 4          | 4 | 0.76005302 | 0.12309572 |            |
| chr21 | 40185000 | 40250754 | 65755  | 3  | 1 | 5 | 0.01091641 | 0.30102999 | 4          | 4 | 0.76005302 | 0.11390336 |            |
| chr21 | 40250754 | 40250813 | 60     | 1  | 1 | 5 | 0.00478973 | 0.30102999 | 5          | 4 | 1.02643191 | 0.11390336 |            |
| chr21 | 40250813 | 40291003 | 40191  | 1  | 1 | 5 | 0.01091641 | 0.30102999 | 4          | 4 | 0.76005302 | 0.11390336 |            |
| chr21 | 40291003 | 40344284 | 53282  | 2  | 1 | 6 | 0.01091641 | 0.30102999 | 4          | 4 | 0.76005302 | 0.12309572 |            |
| chr21 | 40344284 | 40412395 | 68112  | 1  | 1 | 5 | 0.01091641 | 0.19510895 | 4          | 4 | 0.76005302 | 0.19510895 |            |
| chr21 | 40412395 | 40412454 | 60     | 1  | 1 | 5 | 0.00478973 | 0.19510895 | 5          | 5 | 1.02643191 | 0.19510895 |            |
| chr21 | 40412454 | 40486861 | 74408  | 1  | 1 | 5 | 0.01091641 | 0.19510895 | 4          | 5 | 0.76005302 | 0.19510895 |            |
| chr21 | 40486861 | 40486920 | 60     | 1  | 1 | 5 | 0.0429175  | 0.19510895 | 4          | 5 | 0.7744371  | 0.19510895 |            |
| chr21 | 40486920 | 40600417 | 113498 | 2  | 1 | 5 | 0.01091641 | 0.19510895 | 4          | 5 | 0.76005302 | 0.19510895 |            |
| chr21 | 40600417 | 40600476 | 60     | 1  | 1 | 6 | 0.01091641 | 0.30102999 | 4          | 5 | 0.76005302 | 0.12309572 |            |
| chr21 | 40600476 | 40613562 | 13087  | 1  | 1 | 5 | 0.01091641 | 0.19510895 | 4          | 5 | 0.76005302 | 0.19510895 |            |
| chr21 | 40613562 | 40717837 | 104276 | 3  | 1 | 4 | 0.01091641 | 0.11390336 | 4          | 5 | 0.76005302 | 0.30102999 |            |
| chr21 | 40717837 | 40765086 | 47250  | 1  | 1 | 4 | 0.01091641 | 0.18734596 | 4          | 4 | 0.76005302 | 0.18734596 |            |
| chr21 | 40765086 | 40765136 | 51     | 1  | 1 | 4 | 0.01091641 | 0.11390336 | 4          | 5 | 0.76005302 | 0.30102999 |            |
| chr21 | 40765136 | 40782248 | 17113  | 1  | 1 | 4 | 0.01091641 | 0.18734596 | 4          | 4 | 0.76005302 | 0.18734596 |            |
| chr21 | 40782248 | 40782307 | 60     | 1  | 1 | 4 | 0.01091641 | 0.11390336 | 4          | 5 | 0.76005302 | 0.30102999 |            |
| chr21 | 40782307 | 40828654 | 46348  | 1  | 1 | 4 | 0.01091641 | 0.18734596 | 4          | 4 | 0.76005302 | 0.18734596 |            |
| chr21 | 40828654 | 40828713 | 60     | 1  | 1 | 4 | 0.01091641 | 0.11390336 | 4          | 5 | 0.76005302 | 0.30102999 |            |
| chr21 | 40828713 | 40934228 | 105516 | 3  | 1 | 4 | 0.01091641 | 0.18734596 | 4          | 4 | 0.76005302 | 0.18734596 |            |
| chr21 | 40934228 | 41142352 | 208125 | 8  | 1 | 4 | 0.01091641 | 0.06713722 | 4          | 4 | 0.76005302 | 0.44141547 |            |
|       |          |          |        |    |   |   |            |            |            |   |            |            |            |

|       |          |          |        |   |   |   |            |            |   |   |            |            |
|-------|----------|----------|--------|---|---|---|------------|------------|---|---|------------|------------|
| chr21 | 43225133 | 43275477 | 50345  | 2 | 1 | 5 | 8.47E-04   | 0.19510895 | 7 | 5 | 1.62048027 | 0.19510895 |
| chr21 | 43275477 | 43311120 | 35644  | 2 | 2 | 5 | 0.00493743 | 0.19510895 | 7 | 5 | 1.16581773 | 0.19510895 |
| chr21 | 43311120 | 43311179 | 60     | 1 | 2 | 5 | 0.00219498 | 0.12309572 | 8 | 6 | 1.44210395 | 0.30102999 |
| chr21 | 43311179 | 43360953 | 49775  | 1 | 2 | 5 | 0.00493743 | 0.19510895 | 7 | 5 | 1.16581773 | 0.19510895 |
| chr21 | 43360953 | 43412563 | 51611  | 1 | 2 | 4 | 0.00493743 | 0.30102999 | 7 | 3 | 1.16581773 | 0.10122019 |
| chr21 | 43412563 | 43444398 | 31836  | 2 | 2 | 4 | 0.00219498 | 0.30102999 | 8 | 3 | 1.44210395 | 0.10122019 |
| chr21 | 43444398 | 43444452 | 55     | 1 | 2 | 5 | 0.00219498 | 0.19510895 | 8 | 5 | 1.44210395 | 0.19510895 |
| chr21 | 43444452 | 43607477 | 163026 | 3 | 2 | 5 | 0.00219498 | 0.30102999 | 8 | 4 | 1.44210395 | 0.11390336 |
| chr21 | 43607477 | 43607536 | 60     | 1 | 2 | 5 | 0.00219498 | 0.19510895 | 8 | 5 | 1.44210395 | 0.19510895 |
| chr21 | 43607536 | 43665494 | 57959  | 2 | 2 | 5 | 0.00219498 | 0.30102999 | 8 | 4 | 1.44210395 | 0.11390336 |
| chr21 | 43665494 | 43841750 | 176257 | 8 | 2 | 5 | 0.00219498 | 0.19510895 | 8 | 5 | 1.44210395 | 0.19510895 |
| chr21 | 43841750 | 43841809 | 60     | 1 | 2 | 5 | 0.00219498 | 0.12309572 | 8 | 6 | 1.44210395 | 0.30102999 |
| chr21 | 43841809 | 44094899 | 253091 | 7 | 2 | 4 | 0.00493743 | 0.11390336 | 7 | 5 | 1.16581773 | 0.30102999 |
| chr21 | 44094899 | 44128309 | 33411  | 2 | 3 | 4 | 0.0079614  | 0.06713722 | 8 | 6 | 1.07548421 | 0.44141547 |
| chr21 | 44128309 | 44191949 | 63641  | 2 | 2 | 4 | 0.00493743 | 0.06713722 | 7 | 6 | 1.16581773 | 0.44141547 |
| chr21 | 44191949 | 44333382 | 141434 | 4 | 3 | 4 | 0.0079614  | 0.06713722 | 8 | 6 | 1.07548421 | 0.44141547 |
| chr21 | 44333382 | 44484459 | 151078 | 4 | 3 | 4 | 0.01598258 | 0.06713722 | 7 | 6 | 0.84395715 | 0.44141547 |
| chr21 | 44484459 | 44521568 | 37110  | 4 | 3 | 4 | 0.0079614  | 0.06713722 | 8 | 6 | 1.07548421 | 0.44141547 |
| chr21 | 44521568 | 44592529 | 70562  | 3 | 3 | 4 | 0.0079614  | 0.03070643 | 8 | 6 | 0.63695542 | 0.63695542 |
| chr21 | 44592529 | 44624738 | 32210  | 1 | 3 | 3 | 0.0079614  | 0.05670724 | 8 | 5 | 1.07548421 | 0.45545077 |
| chr21 | 44624738 | 44759276 | 134539 | 1 | 3 | 3 | 0.0079614  | 0.10122019 | 8 | 4 | 1.07548421 | 0.30102999 |
| chr21 | 44759276 | 44767770 | 8495   | 2 | 3 | 3 | 0.13499366 | 0.10122019 | 8 | 4 | 0.30102999 | 0.30102999 |
| chr21 | 44767770 | 44848305 | 80536  | 2 | 4 | 3 | 0.02074938 | 0.10122019 | 8 | 4 | 0.79906872 | 0.30102999 |
| chr21 | 44848305 | 44848363 | 59     | 1 | 5 | 3 | 0.04407651 | 0.10122019 | 8 | 4 | 0.58747015 | 0.30102999 |
| chr21 | 44848363 | 44872057 | 23695  | 1 | 4 | 3 | 0.02074938 | 0.17593012 | 8 | 3 | 0.79906872 | 0.17593012 |
| chr21 | 44872057 | 44882757 | 10701  | 2 | 5 | 3 | 0.04407651 | 0.17593012 | 8 | 3 | 0.58747015 | 0.17593012 |
| chr21 | 44882757 | 44922148 | 39392  | 2 | 5 | 3 | 0.04407651 | 0.10122019 | 8 | 4 | 0.58747015 | 0.30102999 |
| chr21 | 44922148 | 44922207 | 60     | 1 | 2 | 4 | 0.13499366 | 0.10122019 | 8 | 4 | 0.30102999 | 0.30102999 |
| chr21 | 44922207 | 44949316 | 27110  | 1 | 6 | 3 | 0.08122616 | 0.10122019 | 8 | 4 | 0.4250187  | 0.30102999 |
| chr21 | 44949316 | 44987273 | 37958  | 1 | 5 | 3 | 0.04407651 | 0.10122019 | 8 | 4 | 0.58747015 | 0.30102999 |
| chr21 | 44987273 | 44987332 | 60     | 1 | 5 | 3 | 0.04407651 | 0.05670724 | 8 | 5 | 0.58747015 | 0.45545077 |
| chr21 | 44987332 | 45053804 | 66473  | 1 | 5 | 3 | 0.04407651 | 0.10122019 | 8 | 4 | 0.58747015 | 0.30102999 |
| chr21 | 45053804 | 45160652 | 106849 | 3 | 5 | 3 | 0.02473314 | 0.10122019 | 9 | 4 | 0.76806864 | 0.30102999 |
| chr21 | 45160652 | 45182194 | 21543  | 4 | 6 | 3 | 0.04875589 | 0.10122019 | 9 | 4 | 0.57322028 | 0.30102999 |
| chr21 | 45182194 | 45213546 | 31353  | 2 | 5 | 3 | 0.02473314 | 0.10122019 | 9 | 4 | 0.76806864 | 0.30102999 |
| chr21 | 45213546 | 45253086 | 39541  | 2 | 5 | 3 | 0.04407651 | 0.10122019 | 8 | 4 | 0.58747015 | 0.30102999 |
| chr21 | 45253086 | 45253145 | 60     | 1 | 7 | 3 | 0.08584816 | 0.10122019 | 9 | 4 | 0.42015402 | 0.30102999 |
| chr21 | 45253145 | 45287718 | 34574  | 1 | 6 | 3 | 0.08122616 | 0.10122019 | 8 | 4 | 0.4250187  | 0.30102999 |
| chr21 | 45287718 | 45347196 | 59479  | 1 | 5 | 3 | 0.04407651 | 0.10122019 | 8 | 4 | 0.58747015 | 0.30102999 |
| chr21 | 45347196 | 45371168 | 23973  | 2 | 6 | 3 | 0.08122616 | 0.03070643 | 8 | 6 | 0.63695542 | 0.63695542 |
| chr21 | 45371168 | 45371227 | 60     | 1 | 7 | 3 | 0.13499366 | 0.01598258 | 8 | 7 | 0.30102999 | 0.84395715 |
| chr21 | 45371227 | 45426572 | 55346  | 2 | 5 | 3 | 0.04407651 | 0.03070643 | 8 | 6 | 0.58747015 | 0.63695542 |
| chr21 | 45426572 | 45479382 | 52811  | 2 | 5 | 4 | 0.04407651 | 0.03812622 | 8 | 7 | 0.58747015 | 0.60763643 |
| chr21 | 45479382 | 45557482 | 78101  | 2 | 5 | 3 | 0.04407651 | 0.03070643 | 8 | 6 | 0.58747015 | 0.63695542 |
| chr21 | 45557482 | 45557536 | 55     | 1 | 6 | 3 | 0.08122616 | 0.01598258 | 8 | 7 | 0.4250187  | 0.84395715 |
| chr21 | 45557536 | 45589067 | 31532  | 1 | 5 | 3 | 0.04407651 | 0.05670724 | 8 | 5 | 0.58747015 | 0.45545077 |
| chr21 | 45589067 | 45626645 | 33779  | 1 | 4 | 3 | 0.02074938 | 0.05670724 | 8 | 5 | 0.79906872 | 0.45545077 |
| chr21 | 45626645 | 45659932 | 33288  | 2 | 4 | 4 | 0.02074938 | 0.06713722 | 8 | 6 | 0.79906872 | 0.44141547 |
| chr21 | 45659932 | 45716787 | 56856  | 5 | 4 | 5 | 0.02074938 | 0.07511598 | 8 | 7 | 0.79906872 | 0.43181735 |
| chr21 | 45716787 | 45727319 | 10533  | 2 | 4 | 5 | 0.02074938 | 0.04407651 | 8 | 8 | 0.79906872 | 0.58747015 |
| chr21 | 45727319 | 45753666 | 26348  | 3 | 6 | 5 | 0.08122616 | 0.04407651 | 8 | 8 | 0.4250187  | 0.58747015 |
| chr21 | 45753666 | 45835771 | 82106  | 2 | 2 | 5 | 0.00219498 | 0.04407651 | 8 | 8 | 1.44210395 | 0.58747015 |
| chr21 | 45835771 | 45835830 | 60     | 1 | 4 | 5 | 0.02074938 | 0.04407651 | 8 | 8 | 0.79906872 | 0.58747015 |
| chr21 | 45835830 | 45904024 | 68195  | 2 | 2 | 5 | 0.00219498 | 0.04407651 | 8 | 8 | 1.44210395 | 0.58747015 |
| chr21 | 45904024 | 45937080 | 33057  | 2 | 3 | 5 | 0.0079614  | 0.04407651 | 8 | 8 | 1.07548421 | 0.58747015 |
| chr21 | 45937080 | 45937129 | 50     | 1 | 5 | 5 | 0.04407651 | 0.04407651 | 8 | 8 | 0.58747015 | 0.58747015 |
| chr21 | 45937129 | 46001538 | 64410  | 3 | 4 | 5 | 0.02074938 | 0.04407651 | 8 | 8 | 0.79906872 | 0.58747015 |
| chr21 | 46001538 | 46056398 | 54861  | 2 | 5 | 5 | 0.04407651 | 0.04407651 | 8 | 8 | 0.58747015 | 0.58747015 |
| chr21 | 46056398 | 46056457 | 60     | 1 | 6 | 5 | 0.08122616 | 0.04407651 | 8 | 8 | 0.4250187  | 0.58747015 |
| chr21 | 46056457 | 46102428 | 45972  | 2 | 4 | 5 | 0.02074938 | 0.04407651 | 8 | 8 | 0.79906872 | 0.58747015 |
| chr21 | 46102428 | 46102484 | 57     | 1 | 6 | 5 | 0.08122616 | 0.04407651 | 8 | 8 | 0.4250187  | 0.58747015 |
| chr21 | 46102484 | 46157668 | 55185  | 1 | 5 | 5 | 0.04407651 | 0.04407651 | 8 | 8 | 0.58747015 | 0.58747015 |
| chr21 | 46157668 | 46193896 | 36229  | 1 | 3 | 5 | 0.0079614  | 0.04407651 | 8 | 8 | 0.58747015 | 0.58747015 |
| chr21 | 46193896 | 46291010 | 97115  | 2 | 2 | 5 | 0.00219498 | 0.04407651 | 8 | 8 | 1.44210395 | 0.58747015 |
| chr21 | 46291010 | 46307230 | 16221  | 2 | 3 | 3 | 0.02473314 | 0.02473314 | 9 | 3 | 0.76806864 | 0.76806864 |
| chr21 | 46307230 | 46357449 | 50230  | 2 | 2 | 5 | 0.00219498 | 0.04407651 | 8 | 8 | 1.44210395 | 0.58747015 |
| chr21 | 46357449 | 46357502 | 54     | 1 | 2 | 5 | 0.00219498 | 0.02473314 | 8 | 8 | 1.44210395 | 0.76806864 |
| chr21 | 46357502 | 46491662 | 134161 | 2 | 2 | 5 | 0.00493743 | 0.02473314 | 7 | 7 | 1.16581773 | 0.76806864 |
| chr21 | 46491662 | 46503092 | 38731  | 3 | 3 | 4 | 0.03812622 | 0.02473314 | 7 | 9 | 0.60763643 | 0.76806864 |
| chr21 | 46503092 | 46602586 | 72195  | 3 | 5 | 5 | 0.07511598 | 0.02473314 | 7 | 9 | 0.43181735 | 0.76806864 |
| chr21 | 46602586 | 46602645 | 60     | 1 | 6 | 5 | 0.129913   | 0.02473314 | 7 | 9 | 0.30102999 | 0.76806864 |
| chr21 | 46602645 | 46655758 | 53114  | 1 | 6 | 5 | 0.129913   | 0.04407651 | 7 | 8 | 0.30102999 | 0.58747015 |
| chr21 | 46655758 | 46722259 | 66502  | 4 | 5 | 5 | 0.07511598 | 0.04407651 | 7 | 8 | 0.43181735 | 0.58747015 |
| chr21 | 46722259 | 46907794 | 185536 | 5 | 4 | 5 | 0.03812622 | 0.04407651 | 7 | 8 | 0.60763643 | 0.58747015 |
| chr21 | 46907794 | 46956979 | 49186  | 3 | 5 | 5 | 0.07511598 | 0.04407651 | 7 | 8 | 0.43181735 | 0.58747015 |
| chr21 | 46956979 | 47003531 | 46553  | 1 | 3 | 5 | 0.01598258 | 0.04407651 | 7 | 8 | 0.84395715 | 0.58747015 |
| chr21 | 47003531 | 47145240 | 141710 | 3 | 3 | 5 | 0.01598258 | 0.07511598 | 7 | 7 | 0.84395715 | 0.43181735 |
| chr21 | 47145240 | 47221774 | 76353  | 2 | 2 | 5 | 0.01053319 | 0.07511598 | 6 | 7 | 0.91219088 | 0.43181735 |
| chr21 | 47221774 | 47221833 | 60     | 1 | 2 | 5 | 0.00493743 | 0.07511598 | 7 | 7 | 1.16581773 | 0.43181735 |
| chr21 | 47221833 | 47269420 | 47588  | 1 | 1 | 5 | 8.47E-04   | 0.07511598 | 7 | 7 | 1.62048027 | 0.43181735 |
| chr21 | 47269420 | 47269479 | 60     | 1 | 2 | 5 | 0.00493743 | 0.07511598 | 7 | 7 | 1.16581773 | 0.43181735 |
| chr21 | 47269479 | 47398532 | 129054 | 3 | 1 | 5 | 8.47E-04   | 0.07511598 | 7 | 7 | 1.62048027 | 0.43181735 |
| chr21 | 47398532 | 47398591 | 60     | 1 | 3 | 5 | 0.01598258 | 0.07511598 | 7 | 7 | 0.84395715 | 0.43181735 |
| chr21 | 47398591 | 47482269 | 83679  | 3 | 1 | 5 | 8.47E-04   | 0.12309572 | 7 | 6 | 1.62048027 | 0.30102999 |
| chr21 | 47482269 | 47542674 | 60406  | 2 | 1 | 6 | 0.00204627 | 0.12309572 | 6 | 6 | 1.31360226 | 0.30102999 |
| chr21 | 47542674 | 47556100 | 13427  | 1 | 1 | 5 | 0.00204627 | 0.07511598 | 7 | 7 | 1.31360226 | 0.43181735 |
| chr21 | 47556100 | 47561659 | 5560   | 2 | 1 | 5 | 0.00478973 | 0.07511598 | 5 | 7 | 1.02643191 | 0.43181735 |
| chr21 | 47561659 | 47609029 | 47371  | 4 | 2 | 5 | 0.02162467 | 0.07511598 | 5 | 7 | 0.68214471 | 0.43181735 |
| chr21 | 47609029 | 47663694 | 54666  | 4 | 2 | 5 | 0.01053319 | 0.07511598 | 7 | 7 | 0.91219088 | 0.43181735 |
| chr21 | 47663694 | 47678838 | 15145  | 2 |   |   |            |            |   |   |            |            |

|       |          |          |        |    |   |   |            |            |   |   |            |            |
|-------|----------|----------|--------|----|---|---|------------|------------|---|---|------------|------------|
| chr22 | 19495392 | 19584817 | 89426  | 3  | 4 | 4 | 0.47744371 | 0.03812622 | 2 | 7 | 0.0429175  | 0.60763643 |
| chr22 | 19584817 | 19660834 | 76018  | 1  | 4 | 4 | 0.47744371 | 0.06713722 | 2 | 6 | 0.0429175  | 0.44141547 |
| chr22 | 19660834 | 19756940 | 96107  | 4  | 5 | 4 | 0.68214471 | 0.06713722 | 2 | 6 | 0.02162467 | 0.44141547 |
| chr22 | 19756940 | 19804667 | 47728  | 3  | 5 | 4 | 0.45545077 | 0.06713722 | 3 | 6 | 0.05670724 | 0.44141547 |
| chr22 | 19804667 | 19804726 | 60     | 1  | 5 | 4 | 0.30102999 | 0.03812622 | 1 | 4 | 0.11390336 | 0.60763643 |
| chr22 | 19804726 | 19971714 | 166989 | 5  | 5 | 4 | 0.45545077 | 0.03812622 | 3 | 7 | 0.05670724 | 0.60763643 |
| chr22 | 19971714 | 20050352 | 78639  | 3  | 4 | 4 | 0.47744371 | 0.03812622 | 2 | 7 | 0.0429175  | 0.60763643 |
| chr22 | 20050352 | 20123442 | 73091  | 4  | 3 | 4 | 0.30102999 | 0.03812622 | 2 | 7 | 0.08289318 | 0.60763643 |
| chr22 | 20123442 | 20159968 | 36527  | 1  | 3 | 4 | 0.30102999 | 0.06713722 | 2 | 6 | 0.08289318 | 0.44141547 |
| chr22 | 20159968 | 20194165 | 34198  | 1  | 2 | 4 | 0.30102999 | 0.06713722 | 1 | 6 | 0.05404976 | 0.44141547 |
| chr22 | 20194165 | 20245228 | 51064  | 3  | 4 | 4 | 0.51676182 | 0.06713722 | 1 | 6 | 0.02438896 | 0.44141547 |
| chr22 | 20245228 | 20270498 | 25271  | 2  | 4 | 4 | 0.76005302 | 0.06713722 | 1 | 6 | 0.01091641 | 0.44141547 |
| chr22 | 20270498 | 20311763 | 41266  | 2  | 3 | 4 | 0.51676182 | 0.06713722 | 1 | 6 | 0.02438896 | 0.44141547 |
| chr22 | 20311763 | 20754422 | 442660 | 1  | 1 | 4 | 0.1218695  | 0.11390336 | 1 | 5 | 0.1218695  | 0.30102999 |
| chr22 | 20754422 | 20795851 | 41430  | 3  | 2 | 4 | 0.1575501  | 0.11390336 | 2 | 5 | 0.1575501  | 0.30102999 |
| chr22 | 20795851 | 20832003 | 36153  | 1  | 2 | 4 | 0.30102999 | 0.11390336 | 1 | 5 | 0.05404976 | 0.30102999 |
| chr22 | 20832003 | 20856757 | 24755  | 1  | 2 | 4 | 0.61140001 | 0.11390336 | 0 | 5 | 0          | 0.30102999 |
| chr22 | 20856757 | 20900601 | 43845  | 2  | 2 | 4 | 0.30102999 | 0.11390336 | 1 | 5 | 0.05404976 | 0.30102999 |
| chr22 | 20900601 | 20942862 | 60     | 1  | 2 | 4 | 0.1575501  | 0.11390336 | 2 | 5 | 0.1575501  | 0.30102999 |
| chr22 | 20942862 | 20992641 | 42303  | 1  | 1 | 4 | 0.05404976 | 0.11390336 | 1 | 5 | 0.30102999 | 0.30102999 |
| chr22 | 20992641 | 21075575 | 82935  | 1  | 1 | 4 | 0.1218695  | 0.11390336 | 1 | 5 | 0.1218695  | 0.30102999 |
| chr22 | 21075575 | 21075634 | 60     | 2  | 2 | 4 | 0.30102999 | 0.11390336 | 1 | 5 | 0.05404976 | 0.30102999 |
| chr22 | 21075634 | 21134126 | 58493  | 2  | 1 | 4 | 0.1575501  | 0.11390336 | 2 | 5 | 0.1575501  | 0.30102999 |
| chr22 | 21134126 | 21134185 | 60     | 1  | 1 | 4 | 0.05404976 | 0.06713722 | 1 | 2 | 0.30102999 | 0.44141547 |
| chr22 | 21134185 | 21192933 | 58749  | 1  | 0 | 4 | 0          | 0.06713722 | 1 | 2 | 0.61140001 | 0.44141547 |
| chr22 | 21192933 | 21323161 | 130229 | 0  | 0 | 4 | 0          | 0.11390336 | 2 | 5 | 0.61140001 | 0.30102999 |
| chr22 | 21323161 | 21998548 | 675388 | 16 | 0 | 4 | 0          | 0.06713722 | 2 | 6 | 0.61140001 | 0.44141547 |
| chr22 | 21998548 | 22055183 | 56636  | 3  | 1 | 4 | 0.05404976 | 0.06713722 | 2 | 6 | 0.30102999 | 0.44141547 |
| chr22 | 22055183 | 22161983 | 106801 | 3  | 1 | 4 | 0.05404976 | 0.11390336 | 2 | 5 | 0.30102999 | 0.30102999 |
| chr22 | 22161983 | 22162042 | 60     | 1  | 2 | 4 | 0.1575501  | 0.11390336 | 2 | 5 | 0.1575501  | 0.30102999 |
| chr22 | 22162042 | 22219392 | 57351  | 1  | 1 | 4 | 0.05404976 | 0.11390336 | 2 | 5 | 0.30102999 | 0.30102999 |
| chr22 | 22219392 | 22283340 | 63949  | 2  | 1 | 3 | 0.05404976 | 0.05670724 | 2 | 5 | 0.30102999 | 0.45545077 |
| chr22 | 22283340 | 22323105 | 39766  | 1  | 1 | 3 | 0.05404976 | 0.10122019 | 2 | 4 | 0.30102999 | 0.30102999 |
| chr22 | 22323105 | 22323157 | 53     | 1  | 1 | 3 | 0.05404976 | 0.05670724 | 2 | 5 | 0.30102999 | 0.45545077 |
| chr22 | 22323157 | 22400747 | 77591  | 1  | 2 | 2 | 0.05404976 | 0.0429175  | 2 | 4 | 0.30102999 | 0.47744371 |
| chr22 | 22400747 | 22400806 | 60     | 1  | 1 | 2 | 0.05404976 | 0.02162467 | 2 | 5 | 0.30102999 | 0.68214471 |
| chr22 | 22400806 | 22467302 | 66497  | 2  | 0 | 2 | 0          | 0.02162467 | 2 | 5 | 0.61140001 | 0.68214471 |
| chr22 | 22467302 | 22669466 | 220165 | 5  | 0 | 3 | 0          | 0.03070643 | 0 | 6 | 0.61140001 | 0.63695542 |
| chr22 | 22669466 | 22721966 | 52501  | 3  | 1 | 3 | 0.05404976 | 0.03070643 | 2 | 6 | 0.30102999 | 0.63695542 |
| chr22 | 22721966 | 23152416 | 430451 | 13 | 1 | 3 | 0.05404976 | 0.05670724 | 2 | 5 | 0.30102999 | 0.45545077 |
| chr22 | 23152416 | 23152475 | 60     | 1  | 4 | 3 | 0.05404976 | 0.11390336 | 2 | 5 | 0.30102999 | 0.30102999 |
| chr22 | 23152475 | 23258229 | 105755 | 2  | 1 | 3 | 0.05404976 | 0.05670724 | 2 | 5 | 0.30102999 | 0.45545077 |
| chr22 | 23258229 | 23258288 | 60     | 1  | 2 | 3 | 0.08289318 | 0.05670724 | 3 | 5 | 0.30102999 | 0.45545077 |
| chr22 | 23258288 | 23301426 | 43139  | 1  | 1 | 3 | 0.05404976 | 0.05670724 | 2 | 5 | 0.30102999 | 0.45545077 |
| chr22 | 23301426 | 23301485 | 60     | 1  | 1 | 3 | 0.02438896 | 0.05670724 | 3 | 5 | 0.51676182 | 0.45545077 |
| chr22 | 23301485 | 23352999 | 51515  | 1  | 1 | 3 | 0.1218695  | 0.05670724 | 1 | 5 | 0.1218695  | 0.45545077 |
| chr22 | 23352999 | 23410181 | 57183  | 2  | 1 | 3 | 0.05404976 | 0.05670724 | 2 | 5 | 0.30102999 | 0.45545077 |
| chr22 | 23410181 | 23443137 | 32957  | 2  | 1 | 3 | 0.02438896 | 0.05670724 | 3 | 5 | 0.51676182 | 0.45545077 |
| chr22 | 23443137 | 23443196 | 60     | 1  | 1 | 3 | 0.01091641 | 0.05670724 | 4 | 5 | 0.76005302 | 0.45545077 |
| chr22 | 23443196 | 23497330 | 54135  | 2  | 1 | 3 | 0.02438896 | 0.05670724 | 3 | 5 | 0.51676182 | 0.45545077 |
| chr22 | 23497330 | 23497389 | 60     | 1  | 1 | 3 | 0.01091641 | 0.05670724 | 4 | 5 | 0.76005302 | 0.45545077 |
| chr22 | 23497389 | 23603430 | 106042 | 3  | 1 | 3 | 0.02438896 | 0.05670724 | 3 | 5 | 0.51676182 | 0.45545077 |
| chr22 | 23603430 | 23603489 | 60     | 1  | 3 | 3 | 0.10122019 | 0.05670724 | 4 | 5 | 0.30102999 | 0.45545077 |
| chr22 | 23603489 | 23668015 | 64527  | 2  | 3 | 3 | 0.17593012 | 0.05670724 | 3 | 5 | 0.17593012 | 0.45545077 |
| chr22 | 23668015 | 23668074 | 60     | 1  | 3 | 3 | 0.05670724 | 0.05670724 | 5 | 5 | 0.45545077 | 0.45545077 |
| chr22 | 23668074 | 23822927 | 154854 | 2  | 1 | 3 | 0.05404976 | 0.05670724 | 2 | 5 | 0.30102999 | 0.45545077 |
| chr22 | 23822927 | 23822986 | 60     | 1  | 4 | 4 | 0.02438896 | 0.11390336 | 3 | 5 | 0.51676182 | 0.30102999 |
| chr22 | 23822986 | 23974097 | 151112 | 2  | 1 | 2 | 0.05404976 | 0.02162467 | 2 | 5 | 0.30102999 | 0.68214471 |
| chr22 | 23974097 | 24040187 | 66091  | 2  | 1 | 3 | 0.05404976 | 0.05670724 | 2 | 5 | 0.30102999 | 0.45545077 |
| chr22 | 24040187 | 24106591 | 66405  | 3  | 1 | 4 | 0.05404976 | 0.11390336 | 2 | 5 | 0.30102999 | 0.30102999 |
| chr22 | 24106591 | 24122328 | 15738  | 2  | 1 | 4 | 0.1218695  | 0.11390336 | 1 | 5 | 0.1218695  | 0.30102999 |
| chr22 | 24122328 | 24230883 | 108556 | 7  | 1 | 4 | 0.05404976 | 0.11390336 | 2 | 5 | 0.30102999 | 0.30102999 |
| chr22 | 24230883 | 24429551 | 198669 | 5  | 1 | 4 | 0.05404976 | 0.18734596 | 4 | 4 | 0.18734596 | 0.18734596 |
| chr22 | 24429551 | 24429610 | 60     | 1  | 1 | 4 | 0.30102999 | 0.18734596 | 4 | 4 | 0.08289318 | 0.18734596 |
| chr22 | 24429610 | 24488422 | 58813  | 2  | 1 | 4 | 0.05404976 | 0.18734596 | 4 | 4 | 0.30102999 | 0.18734596 |
| chr22 | 24488422 | 24488471 | 50     | 1  | 3 | 4 | 0.30102999 | 0.18734596 | 2 | 4 | 0.08289318 | 0.18734596 |
| chr22 | 24488471 | 24557125 | 68655  | 2  | 3 | 4 | 0.30102999 | 0.30102999 | 3 | 2 | 0.08289318 | 0.10122019 |
| chr22 | 24557125 | 24631554 | 74430  | 4  | 2 | 3 | 0.30102999 | 0.17593012 | 2 | 3 | 0.08289318 | 0.17593012 |
| chr22 | 24631554 | 24799476 | 167923 | 5  | 3 | 4 | 0.30102999 | 0.30102999 | 2 | 3 | 0.08289318 | 0.10122019 |
| chr22 | 24799476 | 24886984 | 87509  | 2  | 3 | 3 | 0.30102999 | 0.17593012 | 2 | 2 | 0.08289318 | 0.17593012 |
| chr22 | 24886984 | 24888455 | 101472 | 5  | 4 | 3 | 0.47744371 | 0.17593012 | 2 | 3 | 0.0429175  | 0.17593012 |
| chr22 | 24888455 | 25119103 | 130649 | 1  | 3 | 2 | 0.30102999 | 0.30102999 | 2 | 2 | 0.08289318 | 0.08289318 |
| chr22 | 25119103 | 25207398 | 88296  | 2  | 1 | 3 | 0.05404976 | 0.30102999 | 2 | 2 | 0.30102999 | 0.08289318 |
| chr22 | 25207398 | 25247453 | 40056  | 1  | 0 | 3 | 0          | 0.30102999 | 1 | 2 | 0.61140001 | 0.08289318 |
| chr22 | 25247453 | 25301283 | 53831  | 2  | 0 | 3 | 0          | 0.30102999 | 3 | 2 | 0.93173516 | 0.08289318 |
| chr22 | 25301283 | 25301342 | 60     | 1  | 1 | 3 | 0.02438896 | 0.30102999 | 3 | 2 | 0.51676182 | 0.08289318 |
| chr22 | 25301342 | 25415757 | 114416 | 2  | 0 | 3 | 0          | 0.30102999 | 3 | 2 | 0.93173516 | 0.08289318 |
| chr22 | 25415757 | 25415816 | 60     | 1  | 2 | 3 | 0.08289318 | 0.17593012 | 3 | 3 | 0.30102999 | 0.17593012 |
| chr22 | 25415816 | 25528082 | 112267 | 2  | 0 | 3 | 0          | 0.17593012 | 2 | 3 | 0.61140001 | 0.17593012 |
| chr22 | 25528082 | 25528141 | 60     | 1  | 1 | 3 | 0.05404976 | 0.17593012 | 2 | 3 | 0.30102999 | 0.17593012 |
| chr22 | 25528141 | 25601775 | 73635  | 1  | 0 | 3 | 0          | 0.17593012 | 2 | 3 | 0.61140001 | 0.17593012 |
| chr22 | 25601775 | 25664618 | 62844  | 3  | 0 | 3 | 0          | 0.17593012 | 3 | 3 | 0.93173516 | 0.17593012 |
| chr22 | 25664618 | 25664674 | 57     | 1  | 0 | 4 | 0          | 0.30102999 | 3 | 3 | 0.93173516 | 0.10122019 |
| chr22 | 25664674 | 25705256 | 40583  | 1  | 0 | 4 | 0          | 0.30102999 | 2 | 3 | 0.61140001 | 0.10122019 |
| chr22 | 25705256 | 25767040 | 61785  | 2  | 0 | 4 | 0          | 0.18734596 | 2 | 4 | 0.61140001 | 0.18734596 |
| chr22 | 25767040 | 25799523 | 32484  | 1  | 0 | 4 | 0          | 0.30102999 | 2 | 3 | 0.61140001 | 0.10122019 |
| chr22 | 25799523 | 25831743 | 32221  | 2  | 0 | 4 | 0          | 0.30102999 | 3 | 3 | 0.93173516 | 0.10122019 |
| chr22 | 25831743 | 25973050 | 141308 | 2  | 0 | 3 | 0          | 0.17593012 | 3 | 3 | 0.93173516 | 0.17593012 |
| chr22 | 25973050 | 25973109 | 60     | 1  | 0 | 3 | 0          | 0.17593012 | 4 | 3 | 1.26272838 | 0.17593012 |
| chr22 | 25973109 | 26030221 | 57113  | 1  | 0 | 3 | 0          | 0.17593012 | 3 | 3 | 0.93173516 | 0.17593012 |
| chr22 | 26030221 | 26099303 | 69083  | 2  | 0 | 4 | 0          | 0.30102999 |   |   |            |            |

|       |          |          |        |    |   |   |            |            |   |   |            |            |
|-------|----------|----------|--------|----|---|---|------------|------------|---|---|------------|------------|
| chr22 | 29046492 | 29130362 | 83871  | 2  | 0 | 4 | 0          | 0.06713722 | 3 | 6 | 0.93173516 | 0.44141547 |
| chr22 | 29130362 | 29181580 | 51219  | 4  | 0 | 4 | 0          | 0.03812622 | 3 | 7 | 0.93173516 | 0.60763643 |
| chr22 | 29181580 | 29377102 | 195523 | 7  | 0 | 4 | 0          | 0.02074938 | 3 | 8 | 0.93173516 | 0.79906872 |
| chr22 | 29377102 | 29476423 | 99322  | 3  | 0 | 4 | 0          | 0.03812622 | 3 | 7 | 0.93173516 | 0.60763643 |
| chr22 | 29476423 | 29580804 | 104382 | 2  | 0 | 4 | 0          | 0.06713722 | 3 | 6 | 0.93173516 | 0.44141547 |
| chr22 | 29580804 | 29617783 | 36980  | 1  | 0 | 4 | 0          | 0.06713722 | 2 | 6 | 0.61140001 | 0.44141547 |
| chr22 | 29617783 | 29663041 | 45259  | 2  | 0 | 4 | 0          | 0.03812622 | 2 | 7 | 0.61140001 | 0.60763643 |
| chr22 | 29663041 | 29673609 | 10569  | 2  | 0 | 4 | 0          | 0.02074938 | 2 | 8 | 0.61140001 | 0.79906872 |
| chr22 | 29673609 | 29732104 | 58496  | 6  | 0 | 4 | 0          | 0.02074938 | 3 | 8 | 0.93173516 | 0.79906872 |
| chr22 | 29732104 | 29781698 | 49595  | 1  | 0 | 4 | 0          | 0.03812622 | 3 | 7 | 0.93173516 | 0.60763643 |
| chr22 | 29781698 | 29826746 | 45049  | 1  | 0 | 4 | 0          | 0.18734596 | 3 | 4 | 0.93173516 | 0.18734596 |
| chr22 | 29826746 | 29866987 | 40242  | 2  | 0 | 4 | 0          | 0.11390336 | 3 | 5 | 0.93173516 | 0.30102999 |
| chr22 | 29866987 | 29884824 | 17838  | 2  | 1 | 4 | 0.02438896 | 0.06713722 | 3 | 6 | 0.51676182 | 0.44141547 |
| chr22 | 29884824 | 29902207 | 17384  | 2  | 0 | 4 | 0          | 0.06713722 | 3 | 6 | 0.93173516 | 0.44141547 |
| chr22 | 29902207 | 29927017 | 24811  | 2  | 1 | 4 | 0.02438896 | 0.03812622 | 3 | 7 | 0.51676182 | 0.60763643 |
| chr22 | 29927017 | 29951212 | 24196  | 2  | 3 | 4 | 0.17593012 | 0.03812622 | 3 | 7 | 0.17593012 | 0.60763643 |
| chr22 | 29951212 | 30014172 | 62961  | 1  | 3 | 4 | 0.17593012 | 0.06713722 | 3 | 6 | 0.17593012 | 0.44141547 |
| chr22 | 30014172 | 30074318 | 60147  | 3  | 3 | 4 | 0.10122019 | 0.06713722 | 4 | 6 | 0.30102999 | 0.44141547 |
| chr22 | 30074318 | 30120356 | 46039  | 2  | 3 | 4 | 0.17593012 | 0.06713722 | 3 | 6 | 0.17593012 | 0.44141547 |
| chr22 | 30120356 | 30120405 | 50     | 1  | 3 | 4 | 0.10122019 | 0.06713722 | 4 | 6 | 0.30102999 | 0.44141547 |
| chr22 | 30120405 | 30164431 | 44027  | 1  | 2 | 4 | 0.0429175  | 0.06713722 | 4 | 6 | 0.47744371 | 0.44141547 |
| chr22 | 30164431 | 30281261 | 116831 | 3  | 2 | 3 | 0.08289318 | 0.03070643 | 3 | 6 | 0.63695542 | 0.63695542 |
| chr22 | 30281261 | 30553654 | 272394 | 6  | 2 | 3 | 0.08289318 | 0.01598258 | 3 | 7 | 0.30102999 | 0.84395715 |
| chr22 | 30553654 | 30553713 | 60     | 1  | 2 | 4 | 0.08289318 | 0.03812622 | 3 | 7 | 0.30102999 | 0.60763643 |
| chr22 | 30553713 | 30892411 | 338699 | 15 | 2 | 4 | 0.08289318 | 0.06713722 | 3 | 6 | 0.30102999 | 0.44141547 |
| chr22 | 30892411 | 30892470 | 60     | 1  | 2 | 4 | 0.0429175  | 0.06713722 | 4 | 6 | 0.47744371 | 0.44141547 |
| chr22 | 30892470 | 31117971 | 225502 | 7  | 2 | 4 | 0.08289318 | 0.06713722 | 3 | 6 | 0.30102999 | 0.44141547 |
| chr22 | 31117971 | 31160344 | 42374  | 2  | 2 | 4 | 0.0429175  | 0.06713722 | 4 | 6 | 0.47744371 | 0.44141547 |
| chr22 | 31160344 | 31196071 | 35728  | 2  | 2 | 4 | 0.02162467 | 0.06713722 | 5 | 6 | 0.68214471 | 0.44141547 |
| chr22 | 31196071 | 31275336 | 79266  | 3  | 3 | 4 | 0.05670724 | 0.06713722 | 5 | 6 | 0.45545077 | 0.44141547 |
| chr22 | 31275336 | 31275395 | 60     | 1  | 3 | 5 | 0.05670724 | 0.12309572 | 5 | 6 | 0.45545077 | 0.30102999 |
| chr22 | 31275395 | 31319376 | 43982  | 2  | 3 | 5 | 0.02162467 | 0.12309572 | 5 | 6 | 0.68214471 | 0.30102999 |
| chr22 | 31319376 | 31322682 | 3307   | 2  | 3 | 5 | 0.05670724 | 0.12309572 | 5 | 6 | 0.45545077 | 0.30102999 |
| chr22 | 31322682 | 31435298 | 112617 | 2  | 2 | 4 | 0.0429175  | 0.12309572 | 4 | 6 | 0.47744371 | 0.30102999 |
| chr22 | 31435298 | 31491454 | 56157  | 2  | 3 | 5 | 0.10122019 | 0.12309572 | 4 | 6 | 0.30102999 | 0.30102999 |
| chr22 | 31491454 | 31574438 | 82985  | 5  | 2 | 5 | 0.0429175  | 0.12309572 | 4 | 6 | 0.47744371 | 0.30102999 |
| chr22 | 31574438 | 31603079 | 28642  | 2  | 3 | 5 | 0.10122019 | 0.12309572 | 4 | 6 | 0.30102999 | 0.30102999 |
| chr22 | 31603079 | 31635888 | 32810  | 2  | 3 | 5 | 0.10122019 | 0.07511598 | 4 | 7 | 0.30102999 | 0.43181735 |
| chr22 | 31635888 | 31677678 | 41791  | 1  | 3 | 4 | 0.10122019 | 0.06713722 | 4 | 6 | 0.30102999 | 0.44141547 |
| chr22 | 31677678 | 31798180 | 120503 | 8  | 4 | 4 | 0.18734596 | 0.06713722 | 4 | 6 | 0.18734596 | 0.44141547 |
| chr22 | 31798180 | 31851184 | 53005  | 3  | 4 | 4 | 0.18734596 | 0.11390336 | 4 | 6 | 0.18734596 | 0.30102999 |
| chr22 | 31851184 | 31883160 | 31977  | 2  | 4 | 4 | 0.18734596 | 0.06713722 | 4 | 6 | 0.18734596 | 0.44141547 |
| chr22 | 31883160 | 31980220 | 97061  | 2  | 4 | 4 | 0.30102999 | 0.11390336 | 3 | 5 | 0.10122019 | 0.30102999 |
| chr22 | 31980220 | 31980279 | 60     | 1  | 4 | 4 | 0.18734596 | 0.11390336 | 4 | 5 | 0.18734596 | 0.30102999 |
| chr22 | 31980279 | 32018129 | 37851  | 1  | 4 | 4 | 0.30102999 | 0.11390336 | 3 | 5 | 0.10122019 | 0.30102999 |
| chr22 | 32018129 | 32055138 | 37010  | 1  | 2 | 4 | 0.08289318 | 0.11390336 | 3 | 5 | 0.30102999 | 0.30102999 |
| chr22 | 32055138 | 32055197 | 60     | 1  | 2 | 5 | 0.08289318 | 0.19510895 | 3 | 5 | 0.30102999 | 0.19510895 |
| chr22 | 32055197 | 32092559 | 37363  | 1  | 2 | 5 | 0.1575501  | 0.19510895 | 5 | 5 | 0.1575501  | 0.19510895 |
| chr22 | 32092559 | 32111318 | 18760  | 2  | 4 | 5 | 0.30102999 | 0.19510895 | 3 | 5 | 0.10122019 | 0.19510895 |
| chr22 | 32111318 | 32111377 | 60     | 1  | 4 | 5 | 0.18734596 | 0.19510895 | 4 | 5 | 0.18734596 | 0.19510895 |
| chr22 | 32111377 | 32188701 | 77325  | 2  | 2 | 5 | 0.08289318 | 0.19510895 | 3 | 5 | 0.30102999 | 0.19510895 |
| chr22 | 32188701 | 32188760 | 60     | 1  | 2 | 5 | 0.0429175  | 0.19510895 | 4 | 5 | 0.47744371 | 0.19510895 |
| chr22 | 32188760 | 32308665 | 119906 | 3  | 2 | 5 | 0.1575501  | 0.19510895 | 2 | 5 | 0.1575501  | 0.19510895 |
| chr22 | 32308665 | 32308724 | 60     | 1  | 2 | 5 | 0.08289318 | 0.19510895 | 3 | 5 | 0.30102999 | 0.19510895 |
| chr22 | 32308724 | 32374048 | 65325  | 5  | 2 | 4 | 0.1575501  | 0.11390336 | 2 | 5 | 0.1575501  | 0.30102999 |
| chr22 | 32374048 | 32441612 | 67565  | 1  | 1 | 4 | 0.05404976 | 0.11390336 | 2 | 5 | 0.30102999 | 0.30102999 |
| chr22 | 32441612 | 32498020 | 56409  | 3  | 1 | 5 | 0.05404976 | 0.19510895 | 2 | 5 | 0.30102999 | 0.19510895 |
| chr22 | 32498020 | 32498072 | 53     | 1  | 2 | 5 | 0.1575501  | 0.19510895 | 2 | 5 | 0.1575501  | 0.19510895 |
| chr22 | 32498072 | 32663235 | 165164 | 4  | 1 | 5 | 0.05404976 | 0.19510895 | 2 | 5 | 0.30102999 | 0.19510895 |
| chr22 | 32663235 | 32811955 | 148721 | 4  | 1 | 4 | 0.1218695  | 0.11390336 | 1 | 5 | 0.1218695  | 0.30102999 |
| chr22 | 32811955 | 32881236 | 69282  | 2  | 1 | 4 | 0.30102999 | 0.11390336 | 3 | 0 | 0          | 0.30102999 |
| chr22 | 32881236 | 32908705 | 27470  | 1  | 3 | 4 | 0.30102999 | 0.05670724 | 0 | 5 | 0          | 0.45545077 |
| chr22 | 32908705 | 33197104 | 288400 | 8  | 1 | 3 | 0.1218695  | 0.05670724 | 1 | 5 | 0.1218695  | 0.45545077 |
| chr22 | 33197104 | 33253425 | 56322  | 1  | 3 | 3 | 0          | 0.05670724 | 1 | 5 | 0.30102999 | 0.45545077 |
| chr22 | 33253425 | 33304883 | 51461  | 1  | 3 | 3 | 0.1218695  | 0.05670724 | 1 | 5 | 0.1218695  | 0.45545077 |
| chr22 | 33304883 | 33387277 | 92393  | 3  | 0 | 3 | 0          | 0.05670724 | 1 | 5 | 0.30102999 | 0.45545077 |
| chr22 | 33387277 | 33397336 | 60     | 1  | 2 | 3 | 0.1218695  | 0.05670724 | 1 | 5 | 0.1218695  | 0.45545077 |
| chr22 | 33397336 | 33440680 | 43345  | 1  | 1 | 2 | 0.1218695  | 0.02162467 | 1 | 5 | 0.1218695  | 0.68214471 |
| chr22 | 33440680 | 33711497 | 270818 | 4  | 0 | 2 | 0          | 0.02162467 | 1 | 5 | 0.30102999 | 0.68214471 |
| chr22 | 33711497 | 33743143 | 31647  | 2  | 0 | 3 | 0          | 0.05670724 | 1 | 5 | 0.30102999 | 0.45545077 |
| chr22 | 33743143 | 33852676 | 109534 | 2  | 0 | 2 | 0          | 0.02162467 | 1 | 5 | 0.30102999 | 0.68214471 |
| chr22 | 33852676 | 33852735 | 60     | 1  | 0 | 3 | 0          | 0.05670724 | 1 | 5 | 0.30102999 | 0.45545077 |
| chr22 | 33852735 | 33961402 | 83668  | 2  | 0 | 2 | 0          | 0.02162467 | 1 | 5 | 0.30102999 | 0.68214471 |
| chr22 | 33961402 | 34045020 | 10619  | 2  | 0 | 2 | 0          | 0.02162467 | 0 | 5 | 0          | 0.68214471 |
| chr22 | 34045020 | 34045079 | 60     | 1  | 0 | 2 | 0          | 0.02162467 | 1 | 5 | 0.30102999 | 0.68214471 |
| chr22 | 34045079 | 34988931 | 943853 | 16 | 0 | 2 | 0          | 0.02162467 | 0 | 5 | 0          | 0.68214471 |
| chr22 | 34988931 | 35222738 | 233808 | 4  | 0 | 2 | 0          | 0.0429175  | 0 | 0 | 0          | 0.47744371 |
| chr22 | 35222738 | 35399605 | 176688 | 3  | 1 | 2 | 0.1218695  | 0.01053319 | 1 | 6 | 0.1218695  | 0.91219088 |
| chr22 | 35399605 | 35399664 | 60     | 1  | 2 | 2 | 0.1575501  | 0.01053319 | 2 | 6 | 0.1575501  | 0.91219088 |
| chr22 | 35399664 | 35653034 | 253371 | 4  | 2 | 2 | 0.1575501  | 0.0429175  | 2 | 4 | 0.1575501  | 0.47744371 |
| chr22 | 35653034 | 35653093 | 60     | 1  | 2 | 2 | 0.08289318 | 0.0429175  | 3 | 4 | 0.30102999 | 0.47744371 |
| chr22 | 35653093 | 35706637 | 53545  | 2  | 2 | 2 | 0.30102999 | 0.0429175  | 1 | 4 | 0.05404976 | 0.47744371 |
| chr22 | 35706637 | 35706696 | 60     | 1  | 2 | 3 | 0.30102999 | 0.10122019 | 1 | 4 | 0.05404976 | 0.30102999 |
| chr22 | 35706696 | 35743157 | 36462  | 2  | 2 | 2 | 0.30102999 | 0.0429175  | 1 | 4 | 0.05404976 | 0.47744371 |
| chr22 | 35743157 | 35777499 | 34343  | 2  | 2 | 2 | 0.1575501  | 0.0429175  | 2 | 4 | 0.1575501  | 0.47744371 |
| chr22 | 35777499 | 35901879 | 124381 | 4  | 2 | 2 | 0.30102999 | 0.0429175  | 1 | 4 | 0.05404976 | 0.47744371 |
| chr22 | 35901879 | 35901938 | 60     | 1  | 3 | 3 | 0.17593012 | 0.10122019 | 3 | 4 | 0.30102999 | 0.30102999 |
| chr22 | 35901938 | 35937722 | 35785  | 1  | 2 | 3 | 0.1575501  | 0.10122019 | 1 | 4 | 0.1575501  | 0.30102999 |
| chr22 | 35937722 | 35937781 | 60     | 1  | 2 | 4 | 0.1575501  | 0.18734596 | 4 | 4 | 0.1575501  | 0.18734596 |
| chr22 | 35937781 | 36011187 | 73407  | 2  | 3 | 3 | 0.1575501  | 0.10122019 | 2 | 4 | 0.1575501  | 0.30102999 |
| chr22 | 36011187 | 36055350 | 44164  | 2  | 2 | 3 | 0.30102999 | 0.10122019 | 2 | 4 | 0.08289318 | 0.30102999 |
| chr22 | 36055350 | 36055395 |        |    |   |   |            |            |   |   |            |            |

|       |          |          |        |   |    |   |            |            |   |   |            |            |
|-------|----------|----------|--------|---|----|---|------------|------------|---|---|------------|------------|
| chr22 | 37480029 | 37527633 | 47605  | 2 | 12 | 3 | 2.24559516 | 0.01598258 | 3 | 7 | 2.93E-04   | 0.84395715 |
| chr22 | 37527633 | 37605958 | 78326  | 2 | 11 | 3 | 1.91540774 | 0.01598258 | 3 | 7 | 7.28E-04   | 0.84395715 |
| chr22 | 37605958 | 37629237 | 23280  | 2 | 12 | 3 | 2.24559516 | 0.01598258 | 3 | 7 | 2.93E-04   | 0.84395715 |
| chr22 | 37629237 | 37651545 | 22309  | 4 | 13 | 3 | 2.60294723 | 0.01598258 | 3 | 7 | 1.10E-04   | 0.84395715 |
| chr22 | 37651545 | 37693018 | 41474  | 1 | 12 | 3 | 2.77580851 | 0.01598258 | 2 | 7 | 5.57E-05   | 0.84395715 |
| chr22 | 37693018 | 37700470 | 7453   | 2 | 12 | 3 | 1.81706455 | 0.01598258 | 4 | 7 | 0.00108487 | 0.84395715 |
| chr22 | 37700470 | 37700522 | 53     | 1 | 12 | 3 | 1.46403142 | 0.01598258 | 5 | 7 | 0.00317045 | 0.84395715 |
| chr22 | 37700522 | 37737497 | 72976  | 1 | 11 | 2 | 1.20557689 | 0.00493743 | 5 | 7 | 0.00666883 | 1.16581773 |
| chr22 | 37737497 | 37773556 | 60     | 1 | 11 | 2 | 0.9449689  | 0.00493743 | 6 | 7 | 0.01518174 | 1.16581773 |
| chr22 | 37773556 | 37826760 | 53205  | 1 | 11 | 1 | 0.9449689  | 8.47E-04   | 6 | 7 | 0.01518174 | 1.62048027 |
| chr22 | 37826760 | 37868020 | 41261  | 2 | 12 | 1 | 1.17038931 | 8.47E-04   | 6 | 7 | 0.00778066 | 1.62048027 |
| chr22 | 37868020 | 37868079 | 60     | 1 | 13 | 1 | 1.42397267 | 8.47E-04   | 6 | 7 | 0.00373523 | 1.62048027 |
| chr22 | 37868079 | 37901273 | 33195  | 1 | 13 | 1 | 1.7506523  | 8.47E-04   | 5 | 7 | 0.00141024 | 1.62048027 |
| chr22 | 37901273 | 37908896 | 7624   | 2 | 13 | 2 | 1.7506523  | 0.00493743 | 5 | 7 | 0.00141024 | 1.16581773 |
| chr22 | 37908896 | 37959650 | 50755  | 1 | 12 | 2 | 1.81706455 | 0.00493743 | 4 | 7 | 0.00108487 | 1.16581773 |
| chr22 | 37959650 | 37968292 | 8643   | 2 | 12 | 2 | 1.46403142 | 0.00493743 | 7 | 7 | 0.00317045 | 1.16581773 |
| chr22 | 37968292 | 38009903 | 41612  | 3 | 12 | 2 | 1.17038931 | 0.00493743 | 6 | 7 | 0.00778066 | 1.16581773 |
| chr22 | 38009903 | 38072724 | 62822  | 3 | 11 | 2 | 1.52371709 | 0.00493743 | 4 | 7 | 0.00247414 | 1.16581773 |
| chr22 | 38072724 | 38072780 | 57     | 1 | 12 | 2 | 1.46403142 | 0.00493743 | 5 | 7 | 0.00317045 | 1.16581773 |
| chr22 | 38072780 | 38083315 | 10536  | 1 | 11 | 2 | 1.20557689 | 0.00666883 | 5 | 7 | 0.00666883 | 1.16581773 |
| chr22 | 38083315 | 38083372 | 58     | 1 | 11 | 3 | 1.20557689 | 0.01598258 | 5 | 7 | 0.00666883 | 0.84395715 |
| chr22 | 38083372 | 38150933 | 67522  | 1 | 10 | 3 | 1.2568129  | 0.01598258 | 2 | 7 | 0.00530919 | 0.84395715 |
| chr22 | 38150933 | 38150988 | 56     | 1 | 11 | 3 | 1.52371709 | 0.01598258 | 3 | 4 | 0.00247414 | 0.84395715 |
| chr22 | 38150988 | 38208864 | 57877  | 2 | 9  | 3 | 1.01542894 | 0.01598258 | 4 | 7 | 0.01077081 | 0.84395715 |
| chr22 | 38208864 | 38229631 | 20768  | 3 | 10 | 3 | 1.2568129  | 0.01598258 | 4 | 7 | 0.00530919 | 0.84395715 |
| chr22 | 38229631 | 38258219 | 28589  | 3 | 11 | 3 | 1.52371709 | 0.01598258 | 4 | 7 | 0.00247414 | 0.84395715 |
| chr22 | 38258219 | 38371885 | 113667 | 5 | 10 | 3 | 1.2568129  | 0.01598258 | 4 | 7 | 0.00530919 | 0.84395715 |
| chr22 | 38371885 | 38371943 | 59     | 1 | 11 | 3 | 1.52371709 | 0.01598258 | 4 | 7 | 0.00247414 | 0.84395715 |
| chr22 | 38371943 | 38565610 | 193668 | 8 | 10 | 3 | 1.2568129  | 0.01598258 | 4 | 7 | 0.00530919 | 0.84395715 |
| chr22 | 38565610 | 38615341 | 49732  | 3 | 12 | 3 | 1.81706455 | 0.01598258 | 4 | 7 | 0.00108487 | 0.84395715 |
| chr22 | 38615341 | 38631825 | 16485  | 1 | 11 | 3 | 1.52371709 | 0.01598258 | 4 | 7 | 0.00247414 | 0.84395715 |
| chr22 | 38631825 | 38661052 | 29228  | 1 | 10 | 3 | 1.2568129  | 0.01598258 | 4 | 7 | 0.00530919 | 0.84395715 |
| chr22 | 38661052 | 38709553 | 48502  | 2 | 10 | 4 | 1.2568129  | 0.03812622 | 4 | 7 | 0.00530919 | 0.60763643 |
| chr22 | 38709553 | 38740942 | 31390  | 1 | 10 | 4 | 1.61091002 | 0.03812622 | 3 | 7 | 0.00170589 | 0.60763643 |
| chr22 | 38740942 | 38829024 | 88083  | 2 | 10 | 3 | 1.61091002 | 0.01598258 | 3 | 7 | 0.00170589 | 0.84395715 |
| chr22 | 38829024 | 38846115 | 17092  | 2 | 11 | 3 | 1.52371709 | 0.01598258 | 4 | 7 | 0.00247414 | 0.84395715 |
| chr22 | 38846115 | 38883780 | 37666  | 2 | 9  | 3 | 1.01542894 | 0.01598258 | 4 | 7 | 0.01077081 | 0.84395715 |
| chr22 | 38883780 | 38883839 | 60     | 1 | 11 | 3 | 1.52371709 | 0.01598258 | 4 | 7 | 0.00247414 | 0.84395715 |
| chr22 | 38883839 | 38927238 | 43400  | 1 | 8  | 3 | 1.07548421 | 0.01598258 | 3 | 7 | 0.00796414 | 0.84395715 |
| chr22 | 38927238 | 38987563 | 60326  | 4 | 8  | 3 | 0.79906872 | 0.01598258 | 4 | 7 | 0.02074938 | 0.84395715 |
| chr22 | 38987563 | 38987622 | 60     | 1 | 9  | 4 | 1.01542894 | 0.03812622 | 4 | 7 | 0.01077081 | 0.60763643 |
| chr22 | 38987622 | 39035608 | 47987  | 1 | 8  | 4 | 0.79906872 | 0.01598258 | 7 | 7 | 0.02074938 | 0.84395715 |
| chr22 | 39035608 | 39078752 | 43145  | 2 | 8  | 2 | 0.79906872 | 0.01053319 | 4 | 6 | 0.02074938 | 0.91219088 |
| chr22 | 39078752 | 39078811 | 60     | 1 | 8  | 2 | 0.79906872 | 0.00493743 | 4 | 7 | 0.02074938 | 1.16581773 |
| chr22 | 39078811 | 39096180 | 17370  | 1 | 7  | 2 | 0.60763643 | 0.00493743 | 4 | 7 | 0.03812622 | 1.16581773 |
| chr22 | 39096180 | 39112880 | 16701  | 1 | 7  | 2 | 0.60763643 | 0.01053319 | 4 | 6 | 0.03812622 | 0.91219088 |
| chr22 | 39112880 | 39137063 | 24184  | 2 | 7  | 3 | 0.60763643 | 0.03070643 | 4 | 6 | 0.03812622 | 0.63695542 |
| chr22 | 39137063 | 39137121 | 59     | 1 | 7  | 3 | 0.60763643 | 0.01598258 | 4 | 7 | 0.03812622 | 0.84395715 |
| chr22 | 39137121 | 39150884 | 13764  | 1 | 7  | 3 | 0.60763643 | 0.03070643 | 4 | 6 | 0.03812622 | 0.63695542 |
| chr22 | 39150884 | 39150938 | 55     | 1 | 8  | 3 | 0.79906872 | 0.03070643 | 4 | 6 | 0.02074938 | 0.63695542 |
| chr22 | 39150938 | 39174630 | 23693  | 1 | 7  | 3 | 0.60763643 | 0.03070643 | 4 | 6 | 0.03812622 | 0.63695542 |
| chr22 | 39174630 | 39224174 | 49545  | 1 | 7  | 2 | 0.60763643 | 0.01053319 | 4 | 6 | 0.03812622 | 0.91219088 |
| chr22 | 39224174 | 3929035  | 104862 | 2 | 6  | 2 | 0.44141547 | 0.01053319 | 4 | 6 | 0.06713722 | 0.91219088 |
| chr22 | 3929035  | 39329094 | 60     | 1 | 6  | 3 | 0.44141547 | 0.03070643 | 4 | 6 | 0.06713722 | 0.63695542 |
| chr22 | 39329094 | 39385439 | 56346  | 1 | 5  | 2 | 0.30102999 | 0.01053319 | 4 | 6 | 0.11390336 | 0.91219088 |
| chr22 | 39385439 | 39385485 | 47     | 1 | 5  | 3 | 0.30102999 | 0.03070643 | 4 | 6 | 0.11390336 | 0.63695542 |
| chr22 | 39385485 | 39449640 | 64156  | 2 | 5  | 3 | 0.45545077 | 0.03070643 | 3 | 6 | 0.05670724 | 0.63695542 |
| chr22 | 39449640 | 39449699 | 60     | 1 | 5  | 4 | 0.45545077 | 0.06713722 | 3 | 6 | 0.05670724 | 0.44141547 |
| chr22 | 39449699 | 39483699 | 34001  | 2 | 4  | 4 | 0.30102999 | 0.06713722 | 3 | 6 | 0.11021209 | 0.44141547 |
| chr22 | 39483699 | 39526824 | 43126  | 2 | 4  | 4 | 0.17593012 | 0.06713722 | 3 | 6 | 0.17593012 | 0.44141547 |
| chr22 | 39526824 | 39526883 | 60     | 1 | 3  | 4 | 0.10122019 | 0.06713722 | 2 | 6 | 0.30102999 | 0.44141547 |
| chr22 | 39526883 | 39570511 | 43629  | 2 | 3  | 4 | 0.30102999 | 0.06713722 | 2 | 6 | 0.08289318 | 0.44141547 |
| chr22 | 39570511 | 39570563 | 53     | 1 | 3  | 4 | 0.17593012 | 0.06713722 | 3 | 6 | 0.17593012 | 0.44141547 |
| chr22 | 39570563 | 39624274 | 53712  | 2 | 2  | 4 | 0.08289318 | 0.06713722 | 3 | 6 | 0.30102999 | 0.44141547 |
| chr22 | 39624274 | 39710920 | 86647  | 1 | 1  | 4 | 0.02438896 | 0.06713722 | 4 | 6 | 0.51676182 | 0.44141547 |
| chr22 | 39710920 | 39710919 | 50000  | 2 | 1  | 4 | 0.01091641 | 0.06713722 | 4 | 6 | 0.01091641 | 0.44141547 |
| chr22 | 39710919 | 39711243 | 10324  | 2 | 2  | 4 | 0.0429175  | 0.03812622 | 4 | 7 | 0.47744371 | 0.60763643 |
| chr22 | 39711243 | 39801422 | 30181  | 2 | 2  | 4 | 0.10122019 | 0.03812622 | 4 | 7 | 0.30102999 | 0.60763643 |
| chr22 | 39801422 | 39882895 | 81474  | 2 | 4  | 4 | 0.0429175  | 0.03812622 | 7 | 7 | 0.47744371 | 0.60763643 |
| chr22 | 39882895 | 39925897 | 43003  | 4 | 1  | 4 | 0.02438896 | 0.03812622 | 4 | 7 | 0.51676182 | 0.60763643 |
| chr22 | 39925897 | 39985869 | 59973  | 1 | 0  | 7 | 0          | 0.03812622 | 2 | 7 | 0.61140001 | 0.60763643 |
| chr22 | 39985869 | 40028993 | 43125  | 2 | 1  | 4 | 0.05404976 | 0.03812622 | 2 | 7 | 0.30102999 | 0.60763643 |
| chr22 | 40028993 | 40051794 | 22802  | 2 | 2  | 4 | 0.1755501  | 0.03812622 | 2 | 7 | 0.1755501  | 0.60763643 |
| chr22 | 40051794 | 40051848 | 55     | 1 | 3  | 4 | 0.30102999 | 0.03812622 | 2 | 7 | 0.08289318 | 0.60763643 |
| chr22 | 40051848 | 40083870 | 32023  | 1 | 2  | 7 | 0.1755501  | 0.03812622 | 2 | 7 | 0.1755501  | 0.60763643 |
| chr22 | 40083870 | 40116227 | 32358  | 1 | 2  | 3 | 0.1755501  | 0.01598258 | 2 | 7 | 0.1755501  | 0.84395715 |
| chr22 | 40116227 | 40139760 | 23534  | 1 | 2  | 3 | 0.1755501  | 0.03070643 | 2 | 6 | 0.1755501  | 0.63695542 |
| chr22 | 40139760 | 40161573 | 21814  | 2 | 2  | 3 | 0.08289318 | 0.03070643 | 3 | 6 | 0.30102999 | 0.63695542 |
| chr22 | 40161573 | 40258031 | 96459  | 3 | 3  | 3 | 0.17593012 | 0.03070643 | 3 | 6 | 0.17593012 | 0.63695542 |
| chr22 | 40258031 | 40338828 | 80798  | 2 | 3  | 3 | 0.17593012 | 0.05670724 | 3 | 5 | 0.17593012 | 0.45545077 |
| chr22 | 40338828 | 40355371 | 16544  | 2 | 3  | 3 | 0.10122019 | 0.05670724 | 4 | 5 | 0.30102999 | 0.45545077 |
| chr22 | 40355371 | 40395162 | 39792  | 1 | 2  | 3 | 0.0429175  | 0.05670724 | 4 | 5 | 0.47744371 | 0.45545077 |
| chr22 | 40395162 | 40441961 | 46800  | 2 | 3  | 3 | 0.08289318 | 0.05670724 | 3 | 5 | 0.30102999 | 0.45545077 |
| chr22 | 40441961 | 40503857 | 61897  | 1 | 2  | 3 | 0.08289318 | 0.10122019 | 3 | 4 | 0.30102999 | 0.30102999 |
| chr22 | 40503857 | 40503916 | 60     | 1 | 2  | 3 | 0.0429175  | 0.05670724 | 4 | 5 | 0.47744371 | 0.45545077 |
| chr22 | 40503916 | 40553644 | 49729  | 1 | 2  | 3 | 0.08289318 | 0.10122019 | 3 | 4 | 0.30102999 | 0.30102999 |
| chr22 | 40553644 | 40598077 | 44434  | 1 | 3  | 3 | 0.02438896 | 0.10122019 | 3 | 4 | 0.51676182 | 0.30102999 |
| chr22 | 40598077 | 40658240 | 60164  | 1 | 1  | 3 | 0.05404976 | 0.10122019 | 2 | 4 | 0.30102999 | 0.30102999 |
| chr22 | 40658240 | 40765158 | 106919 | 5 | 1  | 3 | 0.05404976 | 0.05670724 | 2 | 5 | 0.30102999 | 0.45545077 |
| chr22 | 40765158 | 40792649 | 27492  |   |    |   |            |            |   |   |            |            |



|       |          |          |        |    |   |   |            |            |   |    |            |            |
|-------|----------|----------|--------|----|---|---|------------|------------|---|----|------------|------------|
| chr22 | 42514811 | 42556272 | 41462  | 1  | 2 | 2 | 0.61140001 | 0.01053319 | 0 | 6  | 0          | 0.91219088 |
| chr22 | 42556272 | 42576343 | 20072  | 2  | 2 | 2 | 0.61140001 | 0.00493743 | 0 | 7  | 0          | 1.16581773 |
| chr22 | 42576343 | 42576402 | 60     | 1  | 2 | 2 | 0.30102999 | 0.00493743 | 1 | 7  | 0.05404976 | 1.16581773 |
| chr22 | 42576402 | 42601505 | 25104  | 1  | 2 | 2 | 0.30102999 | 0.01053319 | 1 | 6  | 0.05404976 | 0.91219088 |
| chr22 | 42601505 | 42601564 | 60     | 1  | 2 | 2 | 0.30102999 | 0.00493743 | 1 | 7  | 0.05404976 | 1.16581773 |
| chr22 | 42601564 | 42663298 | 61735  | 1  | 2 | 2 | 0.30102999 | 0.02162467 | 1 | 5  | 0.05404976 | 0.68214471 |
| chr22 | 42663298 | 43014867 | 351570 | 11 | 2 | 2 | 0.1575501  | 0.02162467 | 2 | 5  | 0.1575501  | 0.68214471 |
| chr22 | 43014867 | 43089839 | 74973  | 3  | 2 | 2 | 0.30102999 | 0.02162467 | 1 | 5  | 0.05404976 | 0.68214471 |
| chr22 | 43089839 | 43206844 | 117006 | 4  | 2 | 3 | 0.30102999 | 0.05670724 | 1 | 5  | 0.05404976 | 0.45545077 |
| chr22 | 43206844 | 43308126 | 101283 | 3  | 2 | 3 | 0.1575501  | 0.05670724 | 2 | 5  | 0.1575501  | 0.45545077 |
| chr22 | 43308126 | 43415658 | 107533 | 2  | 2 | 3 | 0.30102999 | 0.05670724 | 1 | 5  | 0.05404976 | 0.45545077 |
| chr22 | 43415658 | 43454452 | 38795  | 2  | 2 | 2 | 0.30102999 | 0.02162467 | 1 | 5  | 0.05404976 | 0.68214471 |
| chr22 | 43454452 | 43653392 | 198941 | 8  | 1 | 2 | 0.1218695  | 0.02162467 | 1 | 5  | 0.1218695  | 0.68214471 |
| chr22 | 43653392 | 43709818 | 56427  | 2  | 1 | 2 | 0.1218695  | 0.00493743 | 1 | 7  | 0.1218695  | 1.16581773 |
| chr22 | 43709818 | 43709877 | 60     | 1  | 3 | 3 | 0.1218695  | 0.01598258 | 1 | 7  | 0.1218695  | 0.84395715 |
| chr22 | 43709877 | 43730382 | 20506  | 1  | 1 | 2 | 0.1218695  | 0.01053319 | 1 | 6  | 0.1218695  | 0.91219088 |
| chr22 | 43730382 | 43884454 | 154073 | 4  | 1 | 1 | 0.1218695  | 0.00478973 | 1 | 5  | 0.1218695  | 1.02643191 |
| chr22 | 43884454 | 43884513 | 60     | 1  | 1 | 2 | 0.1218695  | 0.01053319 | 1 | 6  | 0.1218695  | 0.91219088 |
| chr22 | 43884513 | 43924819 | 40307  | 1  | 1 | 1 | 0.1218695  | 0.00478973 | 1 | 5  | 0.1218695  | 1.02643191 |
| chr22 | 43924819 | 43986034 | 61216  | 2  | 1 | 1 | 0.30102999 | 0.00478973 | 0 | 5  | 0          | 1.02643191 |
| chr22 | 43986034 | 44004444 | 18411  | 1  | 1 | 1 | 0.1218695  | 0.00478973 | 1 | 5  | 0.1218695  | 1.02643191 |
| chr22 | 44004444 | 44395191 | 390748 | 11 | 1 | 1 | 0.1218695  | 0.00204627 | 1 | 6  | 0.1218695  | 1.31360226 |
| chr22 | 44395191 | 44433685 | 38495  | 2  | 2 | 1 | 0.30102999 | 0.00204627 | 1 | 6  | 0.05404976 | 1.31360226 |
| chr22 | 44433685 | 44462046 | 28362  | 2  | 2 | 1 | 0.30102999 | 8.47E-04   | 1 | 7  | 0.05404976 | 1.62048027 |
| chr22 | 44462046 | 44462105 | 60     | 1  | 2 | 2 | 0.30102999 | 0.00221948 | 1 | 7  | 0.05404976 | 1.44210395 |
| chr22 | 44462105 | 44547389 | 85285  | 2  | 1 | 0 | 0.30102999 | 8.47E-04   | 1 | 8  | 0.05404976 | 1.62048027 |
| chr22 | 44547389 | 44580643 | 33255  | 1  | 1 | 1 | 0.1218695  | 8.47E-04   | 1 | 7  | 0.1218695  | 1.62048027 |
| chr22 | 44580643 | 44770724 | 190082 | 4  | 1 | 1 | 0.1218695  | 3.39E-04   | 1 | 8  | 0.1218695  | 1.94674965 |
| chr22 | 44770724 | 44770783 | 60     | 1  | 2 | 2 | 0.30102999 | 0.00221948 | 1 | 8  | 0.05404976 | 1.44210395 |
| chr22 | 44770783 | 45111831 | 341049 | 6  | 1 | 2 | 0.1218695  | 0.00221948 | 1 | 8  | 0.1218695  | 1.44210395 |
| chr22 | 45111831 | 45142884 | 31054  | 2  | 1 | 2 | 0.05404976 | 0.00221948 | 2 | 8  | 0.30102999 | 1.44210395 |
| chr22 | 45142884 | 45204182 | 61299  | 2  | 1 | 2 | 0.1218695  | 0.00221948 | 1 | 8  | 0.1218695  | 1.44210395 |
| chr22 | 45204182 | 45374168 | 169987 | 4  | 1 | 2 | 0.1218695  | 0.00493743 | 1 | 7  | 0.1218695  | 1.16581773 |
| chr22 | 45374168 | 45458565 | 84398  | 2  | 2 | 2 | 0.1218695  | 0.00221948 | 1 | 8  | 0.1218695  | 1.44210395 |
| chr22 | 45458565 | 45458624 | 60     | 1  | 1 | 2 | 0.1218695  | 9.54E-04   | 1 | 9  | 0.1218695  | 1.74076927 |
| chr22 | 45458624 | 45590487 | 131864 | 3  | 1 | 1 | 0.1218695  | 1.30E-04   | 1 | 9  | 0.1218695  | 2.29264207 |
| chr22 | 45590487 | 45590546 | 60     | 1  | 2 | 2 | 0.1218695  | 9.54E-04   | 1 | 9  | 0.1218695  | 1.74076927 |
| chr22 | 45590546 | 45768081 | 177536 | 5  | 1 | 1 | 0.1218695  | 1.30E-04   | 1 | 9  | 0.1218695  | 2.29264207 |
| chr22 | 45768081 | 45848269 | 80189  | 5  | 1 | 2 | 0.1218695  | 9.54E-04   | 1 | 9  | 0.1218695  | 1.74076927 |
| chr22 | 45848269 | 45848328 | 60     | 1  | 1 | 2 | 0.05404976 | 9.54E-04   | 2 | 9  | 0.30102999 | 1.74076927 |
| chr22 | 45848328 | 46088850 | 240523 | 4  | 1 | 2 | 0.1218695  | 9.54E-04   | 1 | 9  | 0.1218695  | 1.74076927 |
| chr22 | 46088850 | 46125356 | 36507  | 2  | 1 | 2 | 0.1218695  | 3.90E-04   | 1 | 10 | 0.1218695  | 2.0625085  |
| chr22 | 46125356 | 46316673 | 191318 | 3  | 1 | 1 | 0.1218695  | 1.30E-04   | 1 | 9  | 0.1218695  | 2.29264207 |
| chr22 | 46316673 | 46369947 | 53275  | 2  | 1 | 1 | 0.1218695  | 4.80E-05   | 1 | 10 | 0.1218695  | 2.6588298  |
| chr22 | 46369947 | 46448607 | 78661  | 2  | 1 | 2 | 0.1218695  | 3.90E-04   | 1 | 10 | 0.1218695  | 2.0625085  |
| chr22 | 46448607 | 46547478 | 98872  | 5  | 1 | 2 | 0.1218695  | 1.52E-04   | 1 | 11 | 0.1218695  | 2.40668355 |
| chr22 | 46547478 | 46844473 | 296996 | 11 | 1 | 0 | 0.1218695  | 0          | 1 | 10 | 0.1218695  | 3.523091   |
| chr22 | 46844473 | 46928267 | 83795  | 3  | 1 | 1 | 0.1218695  | 4.80E-05   | 1 | 10 | 0.1218695  | 2.6588298  |
| chr22 | 46928267 | 47130559 | 202293 | 5  | 1 | 0 | 0.1218695  | 0          | 1 | 10 | 0.1218695  | 3.523091   |
| chr22 | 47130559 | 47130618 | 60     | 1  | 1 | 1 | 0.1218695  | 4.80E-05   | 1 | 10 | 0.1218695  | 2.6588298  |
| chr22 | 47130618 | 47171527 | 40910  | 2  | 1 | 1 | 0.30102999 | 4.80E-05   | 0 | 10 | 0          | 2.6588298  |
| chr22 | 47171527 | 47204385 | 32859  | 2  | 1 | 1 | 0.1218695  | 4.80E-05   | 1 | 10 | 0.1218695  | 2.6588298  |
| chr22 | 47204385 | 47357143 | 152759 | 3  | 1 | 0 | 0.1218695  | 0          | 1 | 10 | 0.1218695  | 3.523091   |
| chr22 | 47357143 | 47434969 | 77827  | 3  | 1 | 1 | 0.1218695  | 4.80E-05   | 1 | 10 | 0.1218695  | 2.6588298  |
| chr22 | 47434969 | 47664084 | 229116 | 3  | 1 | 0 | 0.1218695  | 0          | 1 | 10 | 0.1218695  | 3.523091   |
| chr22 | 47664084 | 47786898 | 122815 | 2  | 1 | 1 | 0.1218695  | 0          | 1 | 9  | 0.1218695  | 3.10811765 |
| chr22 | 47786898 | 47786957 | 60     | 1  | 1 | 1 | 0.1218695  | 4.80E-05   | 1 | 10 | 0.1218695  | 2.6588298  |
| chr22 | 47786957 | 47865939 | 78983  | 1  | 1 | 0 | 0.1218695  | 0          | 1 | 10 | 0.1218695  | 3.523091   |
| chr22 | 47865939 | 48139205 | 273267 | 4  | 0 | 0 | 0          | 0          | 1 | 10 | 0.30102999 | 3.523091   |
| chr22 | 48139205 | 48139264 | 60     | 1  | 2 | 0 | 0.30102999 | 0          | 1 | 10 | 0.05404976 | 3.523091   |
| chr22 | 48139264 | 48802163 | 662900 | 10 | 1 | 0 | 0.1218695  | 0          | 1 | 10 | 0.1218695  | 3.523091   |
| chr22 | 48802163 | 48977517 | 175355 | 4  | 1 | 0 | 0.1218695  | 0          | 1 | 9  | 0.1218695  | 3.10811765 |
| chr22 | 48977517 | 48977576 | 60     | 1  | 2 | 1 | 0.30102999 | 1.30E-04   | 1 | 9  | 0.05404976 | 2.29264207 |
| chr22 | 48977576 | 49146109 | 168534 | 5  | 1 | 2 | 0.30102999 | 0          | 1 | 9  | 0.05404976 | 3.10811765 |
| chr22 | 49146109 | 49286759 | 140651 | 3  | 2 | 0 | 0.1575501  | 0          | 2 | 9  | 0.1575501  | 3.10811765 |
| chr22 | 49286759 | 49286818 | 60     | 1  | 1 | 0 | 0.1575501  | 1.30E-04   | 1 | 9  | 0.1575501  | 2.29264207 |
| chr22 | 49286818 | 49371816 | 84999  | 3  | 2 | 0 | 0.1575501  | 0          | 2 | 9  | 0.1575501  | 3.10811765 |
| chr22 | 49371816 | 49595767 | 223952 | 3  | 2 | 0 | 0.30102999 | 0          | 1 | 11 | 0.05404976 | 3.10811765 |
| chr22 | 49595767 | 49595826 | 60     | 1  | 3 | 0 | 0.30102999 | 0          | 2 | 9  | 0.08289318 | 3.10811765 |
| chr22 | 49595826 | 49752834 | 157009 | 2  | 3 | 0 | 0.51676182 | 0          | 1 | 9  | 0.02438986 | 3.10811765 |
| chr22 | 49752834 | 49833547 | 80714  | 2  | 3 | 0 | 0.30102999 | 0          | 2 | 9  | 0.08289318 | 3.10811765 |
| chr22 | 49833547 | 49920125 | 86579  | 2  | 4 | 0 | 0.47744371 | 0          | 2 | 9  | 0.0429175  | 3.10811765 |
| chr22 | 49920125 | 49920184 | 60     | 1  | 4 | 0 | 0.30102999 | 0          | 3 | 9  | 0.10122019 | 3.10811765 |
| chr22 | 49920184 | 50004759 | 84576  | 2  | 4 | 0 | 0.47744371 | 0          | 2 | 9  | 0.0429175  | 3.10811765 |
| chr22 | 50004759 | 50055627 | 50869  | 1  | 4 | 1 | 0.47744371 | 1.30E-04   | 2 | 9  | 0.0429175  | 2.29264207 |
| chr22 | 50055627 | 50131714 | 76088  | 1  | 4 | 1 | 0.76005302 | 1.30E-04   | 1 | 9  | 0.01091641 | 2.29264207 |
| chr22 | 50131714 | 50131773 | 60     | 1  | 6 | 1 | 0.91219088 | 1.30E-04   | 2 | 9  | 0.01053319 | 2.29264207 |
| chr22 | 50131773 | 50172917 | 41145  | 1  | 5 | 1 | 1.02643191 | 1.30E-04   | 1 | 9  | 0.00478973 | 2.29264207 |
| chr22 | 50172917 | 50181381 | 8465   | 2  | 5 | 1 | 0.68214471 | 1.30E-04   | 2 | 9  | 0.02162467 | 2.29264207 |
| chr22 | 50181381 | 50151294 | 333914 | 10 | 5 | 2 | 0.68214471 | 9.54E-04   | 2 | 9  | 0.02162467 | 1.74076927 |
| chr22 | 50151294 | 50613880 | 98587  | 5  | 5 | 1 | 0.68214471 | 1.30E-04   | 2 | 9  | 0.02162467 | 2.29264207 |
| chr22 | 50613880 | 50922383 | 308504 | 14 | 5 | 2 | 0.68214471 | 9.54E-04   | 2 | 9  | 0.02162467 | 1.74076927 |
| chr22 | 50922383 | 51043490 | 121108 | 7  | 5 | 3 | 0.68214471 | 0.00378107 | 2 | 9  | 0.02162467 | 1.33111237 |
| chr22 | 51043490 | 51104602 | 61113  | 2  | 3 | 3 | 0.30102999 | 0.00378107 | 2 | 9  | 0.08289318 | 1.33111237 |
| chr22 | 51104602 | 51178264 | 73663  | 1  | 3 | 2 | 0.05404976 | 9.54E-04   | 2 | 9  | 0.30102999 | 1.74076927 |
| chrX  | 61091    | 286524   | 225434 | 7  | 0 | 4 | 0          | 0.18734596 | 0 | 4  | 0          | 0.18734596 |
| chrX  | 286524   | 298336   | 11813  | 2  | 0 | 6 | 0          | 0.20064824 | 0 | 6  | 0          | 0.20064824 |
| chrX  | 298336   | 380280   | 81945  | 3  | 0 | 6 | 0          | 0.30102999 | 0 | 5  | 0          | 0.12309572 |
| chrX  | 380280   | 428231   | 47952  | 3  | 0 | 6 | 0          | 0.20064824 | 0 | 6  | 0          | 0.20064824 |
| chrX  | 428231   | 550458   | 122228 | 4  | 0 | 6 | 0          | 0.129913   | 0 | 7  | 0          | 0.30102999 |
| chrX  | 550458   | 594356   | 43899  | 2  | 0 | 6 | 0          | 0.04875589 | 0 | 9  | 0          | 0.5732208  |
| chrX  | 594356   | 658211   | 63856  | 3  | 0 | 6 | 0          | 0.02793176 | 0 | 10 | 0          | 0.74627054 |
| chrX  | 658211   | 697227   | 39017  | 3  | 0 | 7 | 0          | 0.05232577 | 0 | 10 | 0          | 0.56314362 |
| chrX  |          |          |        |    |   |   |            |            |   |    |            |            |

|      |          |          |        |    |   |   |   |            |   |   |            |            |
|------|----------|----------|--------|----|---|---|---|------------|---|---|------------|------------|
| chrX | 2558710  | 2558766  | 57     | 1  | 0 | 7 | 0 | 0.13499366 | 3 | 8 | 0.93173516 | 0.30102999 |
| chrX | 2558766  | 2573016  | 14251  | 1  | 0 | 7 | 0 | 0.20469099 | 3 | 7 | 0.93173516 | 0.20469099 |
| chrX | 2573016  | 2612294  | 39279  | 2  | 0 | 7 | 0 | 0.30102999 | 3 | 6 | 0.93173516 | 0.129913   |
| chrX | 2612294  | 2651980  | 39687  | 1  | 0 | 6 | 0 | 0.20064824 | 3 | 6 | 0.93173516 | 0.20064824 |
| chrX | 2651980  | 2656392  | 4413   | 2  | 0 | 7 | 0 | 0.129913   | 4 | 7 | 1.26272838 | 0.30102999 |
| chrX | 2656392  | 2865276  | 208885 | 5  | 0 | 6 | 0 | 0.20064824 | 4 | 6 | 1.26272838 | 0.20064824 |
| chrX | 2865276  | 2865335  | 60     | 1  | 0 | 7 | 0 | 0.30102999 | 4 | 6 | 1.26272838 | 0.129913   |
| chrX | 2865335  | 2937367  | 72033  | 1  | 0 | 7 | 0 | 0.30102999 | 3 | 6 | 0.93173516 | 0.129913   |
| chrX | 2937367  | 2937426  | 60     | 1  | 0 | 7 | 0 | 0.30102999 | 4 | 6 | 1.26272838 | 0.129913   |
| chrX | 2937426  | 2970843  | 33418  | 1  | 0 | 6 | 0 | 0.20064824 | 3 | 6 | 0.93173516 | 0.20064824 |
| chrX | 2970843  | 2998909  | 28067  | 2  | 0 | 6 | 0 | 0.20064824 | 4 | 6 | 1.26272838 | 0.20064824 |
| chrX | 2998909  | 2998968  | 60     | 1  | 0 | 7 | 0 | 0.30102999 | 4 | 6 | 1.26272838 | 0.129913   |
| chrX | 2998968  | 3059506  | 60539  | 0  | 1 | 6 | 0 | 0.20064824 | 3 | 6 | 0.93173516 | 0.20064824 |
| chrX | 3059506  | 3252654  | 193149 | 3  | 0 | 5 | 0 | 0.12309572 | 3 | 6 | 0.93173516 | 0.30102999 |
| chrX | 3252654  | 3313941  | 61288  | 1  | 0 | 5 | 0 | 0.19510895 | 3 | 5 | 0.93173516 | 0.19510895 |
| chrX | 3313941  | 3314000  | 60     | 1  | 0 | 5 | 0 | 0.19510895 | 4 | 5 | 1.26272838 | 0.19510895 |
| chrX | 3314000  | 3376702  | 62703  | 1  | 0 | 4 | 0 | 0.11390336 | 4 | 5 | 1.26272838 | 0.30102999 |
| chrX | 3376702  | 3419649  | 42948  | 1  | 0 | 4 | 0 | 0.11390336 | 3 | 5 | 0.93173516 | 0.30102999 |
| chrX | 3419649  | 3542001  | 122353 | 2  | 0 | 3 | 0 | 0.05670724 | 3 | 5 | 0.93173516 | 0.45545077 |
| chrX | 3542001  | 3542060  | 60     | 1  | 0 | 4 | 0 | 0.11390336 | 3 | 5 | 0.93173516 | 0.30102999 |
| chrX | 3542060  | 3598637  | 56578  | 1  | 0 | 3 | 0 | 0.05670724 | 3 | 5 | 0.93173516 | 0.45545077 |
| chrX | 3598637  | 3640941  | 42305  | 2  | 0 | 3 | 0 | 0.05670724 | 4 | 5 | 1.26272838 | 0.45545077 |
| chrX | 3640941  | 4229811  | 588871 | 4  | 0 | 3 | 0 | 0.17593012 | 3 | 4 | 0.93173516 | 0.17593012 |
| chrX | 4229811  | 4229870  | 60     | 1  | 0 | 3 | 0 | 0.10122019 | 3 | 4 | 0.93173516 | 0.30102999 |
| chrX | 4229870  | 4291542  | 61673  | 1  | 0 | 3 | 0 | 0.17593012 | 2 | 3 | 0.61140001 | 0.17593012 |
| chrX | 4291542  | 4387530  | 95989  | 1  | 0 | 3 | 0 | 0.17593012 | 1 | 3 | 0.30102999 | 0.17593012 |
| chrX | 4387530  | 4490526  | 102997 | 2  | 0 | 3 | 0 | 0.10122019 | 2 | 4 | 0.61140001 | 0.30102999 |
| chrX | 4490526  | 4591132  | 100607 | 2  | 0 | 4 | 0 | 0.18734596 | 2 | 4 | 0.61140001 | 0.18734596 |
| chrX | 4591132  | 4829206  | 238075 | 4  | 0 | 3 | 0 | 0.10122019 | 1 | 4 | 0.30102999 | 0.30102999 |
| chrX | 4829206  | 4934909  | 105704 | 2  | 0 | 4 | 0 | 0.18734596 | 1 | 4 | 0.30102999 | 0.18734596 |
| chrX | 4934909  | 4934968  | 60     | 1  | 0 | 4 | 0 | 0.06713722 | 2 | 6 | 0.61140001 | 0.44141547 |
| chrX | 4934968  | 4995810  | 60843  | 1  | 0 | 4 | 0 | 0.06713722 | 1 | 6 | 0.30102999 | 0.44141547 |
| chrX | 4995810  | 5083290  | 87481  | 2  | 0 | 4 | 0 | 0.06713722 | 2 | 6 | 0.61140001 | 0.44141547 |
| chrX | 5083290  | 5152054  | 68765  | 2  | 0 | 5 | 0 | 0.07511598 | 3 | 7 | 0.93173516 | 0.43181735 |
| chrX | 5152054  | 5354960  | 202907 | 2  | 0 | 4 | 0 | 0.03812622 | 3 | 7 | 0.93173516 | 0.60763643 |
| chrX | 5354960  | 5355019  | 60     | 1  | 0 | 5 | 0 | 0.07511598 | 3 | 7 | 0.93173516 | 0.43181735 |
| chrX | 5355019  | 5513119  | 158101 | 1  | 0 | 4 | 0 | 0.03812622 | 3 | 7 | 0.93173516 | 0.60763643 |
| chrX | 5513119  | 5697810  | 184692 | 1  | 0 | 3 | 0 | 0.01598258 | 3 | 7 | 0.93173516 | 0.84395715 |
| chrX | 5697810  | 5697869  | 60     | 1  | 0 | 5 | 0 | 0.07511598 | 3 | 7 | 0.93173516 | 0.43181735 |
| chrX | 5697869  | 5837199  | 139331 | 2  | 0 | 4 | 0 | 0.10122019 | 3 | 4 | 0.93173516 | 0.30102999 |
| chrX | 5837199  | 5881919  | 44721  | 2  | 0 | 4 | 0 | 0.11390336 | 3 | 5 | 0.93173516 | 0.30102999 |
| chrX | 5881919  | 6039361  | 157443 | 4  | 0 | 4 | 0 | 0.11390336 | 2 | 5 | 0.61140001 | 0.30102999 |
| chrX | 6039361  | 6705327  | 665967 | 8  | 0 | 4 | 0 | 0.06713722 | 2 | 6 | 0.61140001 | 0.44141547 |
| chrX | 6705327  | 7033316  | 327990 | 4  | 0 | 4 | 0 | 0.11390336 | 2 | 6 | 0.61140001 | 0.30102999 |
| chrX | 7033316  | 7341214  | 307899 | 5  | 0 | 3 | 0 | 0.05670724 | 2 | 5 | 0.61140001 | 0.45545077 |
| chrX | 7341214  | 7341273  | 60     | 1  | 0 | 3 | 0 | 0.03070643 | 2 | 6 | 0.63695542 | 0.63695542 |
| chrX | 7341273  | 7806007  | 464735 | 3  | 0 | 3 | 0 | 0.03070643 | 1 | 6 | 0.30102999 | 0.63695542 |
| chrX | 7806007  | 7896548  | 90542  | 4  | 0 | 3 | 0 | 0.03070643 | 2 | 6 | 0.61140001 | 0.63695542 |
| chrX | 7896548  | 7964736  | 68189  | 2  | 0 | 4 | 0 | 0.06713722 | 3 | 6 | 0.93173516 | 0.44141547 |
| chrX | 7964736  | 8115094  | 150359 | 3  | 0 | 3 | 0 | 0.03070643 | 1 | 6 | 0.30102999 | 0.63695542 |
| chrX | 8115094  | 8115153  | 60     | 1  | 0 | 4 | 0 | 0.06713722 | 1 | 6 | 0.30102999 | 0.44141547 |
| chrX | 8115153  | 8797458  | 682306 | 11 | 0 | 3 | 0 | 0.03070643 | 4 | 6 | 0.30102999 | 0.63695542 |
| chrX | 8797458  | 8959665  | 162208 | 3  | 0 | 3 | 0 | 0.03070643 | 2 | 6 | 0.61140001 | 0.63695542 |
| chrX | 8959665  | 9006088  | 46424  | 2  | 0 | 3 | 0 | 0.03070643 | 6 | 6 | 0.93173516 | 0.63695542 |
| chrX | 9006088  | 9389157  | 383070 | 8  | 0 | 4 | 0 | 0.03812622 | 3 | 7 | 0.93173516 | 0.60763643 |
| chrX | 9389157  | 9504733  | 115577 | 2  | 0 | 3 | 0 | 0.01598258 | 3 | 7 | 0.93173516 | 0.84395715 |
| chrX | 9504733  | 9641242  | 136510 | 4  | 0 | 4 | 0 | 0.03812622 | 3 | 7 | 0.93173516 | 0.60763643 |
| chrX | 9641242  | 9797009  | 155768 | 4  | 0 | 4 | 0 | 0.02074938 | 3 | 8 | 0.93173516 | 0.79906872 |
| chrX | 9797009  | 9907615  | 110607 | 2  | 0 | 4 | 0 | 0.03812622 | 3 | 7 | 0.93173516 | 0.60763643 |
| chrX | 9907615  | 10207876 | 300262 | 8  | 0 | 3 | 0 | 0.01598258 | 3 | 7 | 0.93173516 | 0.84395715 |
| chrX | 10207876 | 10207935 | 60     | 1  | 0 | 4 | 0 | 0.03812622 | 3 | 7 | 0.93173516 | 0.60763643 |
| chrX | 10207935 | 10401388 | 193454 | 2  | 0 | 3 | 0 | 0.01598258 | 3 | 7 | 0.93173516 | 0.84395715 |
| chrX | 10401388 | 10442700 | 41313  | 2  | 0 | 4 | 0 | 0.03812622 | 3 | 7 | 0.93173516 | 0.60763643 |
| chrX | 10442700 | 10805177 | 362478 | 6  | 0 | 3 | 0 | 0.01598258 | 3 | 7 | 0.93173516 | 0.84395715 |
| chrX | 10805177 | 10845298 | 40122  | 2  | 0 | 4 | 0 | 0.03812622 | 3 | 7 | 0.93173516 | 0.60763643 |
| chrX | 10845298 | 11083631 | 238334 | 3  | 0 | 3 | 0 | 0.01598258 | 1 | 7 | 0.30102999 | 0.84395715 |
| chrX | 11083631 | 11083690 | 60     | 1  | 0 | 3 | 0 | 0.01598258 | 3 | 2 | 0.61140001 | 0.84395715 |
| chrX | 11083690 | 11178896 | 95207  | 0  | 0 | 3 | 0 | 0.01598258 | 3 | 1 | 0.30102999 | 0.84395715 |
| chrX | 11178896 | 11384867 | 205972 | 6  | 0 | 3 | 0 | 0.01598258 | 0 | 7 | 0          | 0.84395715 |
| chrX | 11384867 | 11384926 | 60     | 1  | 0 | 4 | 0 | 0.03812622 | 1 | 7 | 0.30102999 | 0.60763643 |
| chrX | 11384926 | 11487710 | 102785 | 2  | 0 | 4 | 0 | 0.03812622 | 0 | 7 | 0.60763643 | 0.60763643 |
| chrX | 11487710 | 11530270 | 42561  | 1  | 0 | 3 | 0 | 0.01598258 | 1 | 0 | 0          | 0.84395715 |
| chrX | 11530270 | 11530329 | 60     | 1  | 0 | 3 | 0 | 0.01598258 | 1 | 7 | 0.30102999 | 0.84395715 |
| chrX | 11530329 | 11668762 | 138434 | 2  | 0 | 3 | 0 | 0.01598258 | 0 | 7 | 0          | 0.84395715 |
| chrX | 11668762 | 11668821 | 60     | 1  | 0 | 5 | 0 | 0.07511598 | 2 | 7 | 0.61140001 | 0.43181735 |
| chrX | 11668821 | 11759270 | 90450  | 2  | 0 | 3 | 0 | 0.01598258 | 0 | 7 | 0          | 0.84395715 |
| chrX | 11759270 | 11793498 | 34229  | 3  | 0 | 5 | 0 | 0.07511598 | 2 | 7 | 0.61140001 | 0.43181735 |
| chrX | 11793498 | 11921587 | 128090 | 2  | 0 | 5 | 0 | 0.07511598 | 1 | 7 | 0.30102999 | 0.43181735 |
| chrX | 11921587 | 11921646 | 60     | 1  | 0 | 6 | 0 | 0.129913   | 7 | 7 | 0.61140001 | 0.30102999 |
| chrX | 11921646 | 12210464 | 288819 | 5  | 0 | 6 | 0 | 0.129913   | 1 | 7 | 0.30102999 | 0.30102999 |
| chrX | 12210464 | 12210523 | 60     | 1  | 0 | 6 | 0 | 0.08122616 | 8 | 8 | 0.4250187  | 0.4250187  |
| chrX | 12210523 | 12378720 | 168198 | 4  | 0 | 6 | 0 | 0.08122616 | 0 | 8 | 0          | 0.4250187  |
| chrX | 12378720 | 12413852 | 35133  | 1  | 0 | 6 | 0 | 0.129913   | 0 | 7 | 0          | 0.30102999 |
| chrX | 12413852 | 12733261 | 319410 | 6  | 0 | 6 | 0 | 0.20064824 | 0 | 6 | 0          | 0.20064824 |
| chrX | 12733261 | 12733320 | 60     | 1  | 0 | 7 | 0 | 0.30102999 | 0 | 6 | 0          | 0.129913   |
| chrX | 12733320 | 12886945 | 153626 | 2  | 0 | 6 | 0 | 0.20064824 | 2 | 0 | 0          | 0.20064824 |
| chrX | 12886945 | 12904320 | 17376  | 2  | 0 | 7 | 0 | 0.30102999 | 0 | 6 | 0          | 0.129913   |
| chrX | 12904320 | 12939783 | 35644  | 1  | 0 | 6 | 0 | 0.20064824 | 0 | 6 | 0          | 0.20064824 |
| chrX | 12939783 | 13038152 | 98370  | 3  | 0 | 7 | 0 | 0.30102999 | 0 | 6 | 0          | 0.129913   |
| chrX | 13038152 | 13038211 | 60     | 1  | 0 | 7 | 0 | 0.30102999 | 2 | 6 | 0.61140001 | 0.129913   |
| chrX | 13038211 | 13146184 | 107974 | 2  | 0 | 6 | 0 | 0.30102999 | 1 | 6 | 0.30102999 | 0.129913   |
| chrX | 13146184 | 13146243 | 60     | 1  | 0 | 7 | 0 | 0.30102999 | 2 | 6 | 0.61140001 | 0.129913   |
| chrX | 13146243 | 13399972 | 253730 | 4  | 0 | 6 | 0 | 0.30102999 | 5 | 5 | 0.61140001 | 0.12309572 |
| chrX | 13399972 | 13589795 | 189824 | 2  | 0 | 5 | 0 | 0.19510895 | 2 | 5 | 0.61140001 | 0.19510895 |
| chrX | 13589795 | 13589854 | 60     | 1  | 0 | 6 | 0 | 0.30102999 | 2 | 5 | 0.61140001 | 0.12309572 |
| chrX | 13589854 | 13640036 | 50183  | 1  | 0 | 6 | 0 | 0.30102999 | 1 | 5 | 0.30102999 | 0.12309572 |
| chrX | 13640036 | 13640095 | 60     | 1  | 0 | 7 | 0 | 0.30102999 | 6 | 6 | 0.30102999 | 0.129913   |
| chrX | 13640095 | 13711721 | 71627  | 2  | 0 | 7 | 0 | 0.43181735 | 1 | 5 | 0.30102999 | 0.07511598 |

|        |          |          |        |    |   |   |   |            |   |   |            |            |
|--------|----------|----------|--------|----|---|---|---|------------|---|---|------------|------------|
| chrX   | 16159135 | 16204392 | 45258  | 2  | 0 | 5 | 0 | 0.12309572 | 2 | 6 | 0.61140001 | 0.30102999 |
| chrX   | 16204392 | 16319012 | 114621 | 1  | 0 | 5 | 0 | 0.12309572 | 1 | 6 | 0.30102999 | 0.30102999 |
| chrX   | 16319012 | 16414693 | 95682  | 1  | 0 | 4 | 0 | 0.06713722 | 1 | 6 | 0.30102999 | 0.44141547 |
| chrX   | 16414693 | 16611030 | 196338 | 3  | 0 | 3 | 0 | 0.03070643 | 1 | 6 | 0.30102999 | 0.63695542 |
| chrX   | 16611030 | 16739217 | 128188 | 3  | 0 | 2 | 0 | 0.01053319 | 1 | 6 | 0.30102999 | 0.91219088 |
| chrX   | 16739217 | 16809246 | 70030  | 3  | 0 | 3 | 0 | 0.03070643 | 1 | 6 | 0.30102999 | 0.63695542 |
| chrX   | 16809246 | 16887301 | 78056  | 4  | 0 | 4 | 0 | 0.06713722 | 1 | 6 | 0.30102999 | 0.44141547 |
| chrX   | 16887301 | 17040344 | 153044 | 4  | 0 | 5 | 0 | 0.12309572 | 1 | 6 | 0.30102999 | 0.30102999 |
| chrX   | 17040344 | 17144304 | 103961 | 3  | 0 | 5 | 0 | 0.07511598 | 1 | 7 | 0.30102999 | 0.43181735 |
| chrX   | 17144304 | 17305387 | 161084 | 2  | 0 | 4 | 0 | 0.06713722 | 1 | 6 | 0.30102999 | 0.44141547 |
| chrX   | 17305387 | 17305446 | 60     | 1  | 0 | 5 | 0 | 0.07511598 | 1 | 7 | 0.30102999 | 0.43181735 |
| chrX   | 17305446 | 17469460 | 164015 | 3  | 0 | 4 | 0 | 0.03812622 | 1 | 7 | 0.30102999 | 0.60763643 |
| chrX   | 17469460 | 17528288 | 58829  | 1  | 0 | 4 | 0 | 0.06713722 | 1 | 6 | 0.30102999 | 0.44141547 |
| chrX   | 17528288 | 17528347 | 60     | 1  | 0 | 5 | 0 | 0.12309572 | 1 | 6 | 0.30102999 | 0.30102999 |
| chrX   | 17528347 | 17579917 | 51571  | 1  | 0 | 4 | 0 | 0.06713722 | 1 | 6 | 0.30102999 | 0.44141547 |
| chrX   | 17579917 | 17818971 | 239055 | 6  | 0 | 4 | 0 | 0.06713722 | 2 | 6 | 0.61140001 | 0.44141547 |
| chrX   | 17818971 | 17820509 | 1539   | 2  | 0 | 4 | 0 | 0.03812622 | 2 | 7 | 0.61140001 | 0.60763643 |
| chrX   | 17820509 | 17881235 | 60727  | 2  | 0 | 3 | 0 | 0.00493743 | 2 | 7 | 0.61140001 | 1.16581773 |
| chrX   | 17881235 | 17936374 | 55140  | 2  | 0 | 2 | 0 | 0.01598258 | 2 | 7 | 0.61140001 | 0.84395715 |
| chrX   | 17936374 | 17936433 | 60     | 1  | 0 | 4 | 0 | 0.03812622 | 2 | 7 | 0.61140001 | 0.60763643 |
| chrX   | 17936433 | 18063359 | 159927 | 2  | 0 | 3 | 0 | 0.01598258 | 2 | 7 | 0.61140001 | 0.84395715 |
| chrX   | 18063359 | 18194098 | 97740  | 2  | 0 | 4 | 0 | 0.03812622 | 2 | 7 | 0.61140001 | 0.60763643 |
| chrX   | 18194098 | 18448419 | 254322 | 7  | 0 | 5 | 0 | 0.07511598 | 2 | 7 | 0.61140001 | 0.43181735 |
| chrX   | 18448419 | 18448478 | 60     | 1  | 0 | 6 | 0 | 0.129913   | 2 | 7 | 0.61140001 | 0.30102999 |
| chrX   | 18448478 | 18482783 | 34306  | 1  | 0 | 5 | 0 | 0.07511598 | 2 | 7 | 0.61140001 | 0.43181735 |
| chrX   | 18482783 | 18568506 | 85724  | 2  | 0 | 2 | 0 | 0.12309572 | 2 | 6 | 0.61140001 | 0.30102999 |
| chrX   | 18568506 | 18603611 | 35106  | 2  | 0 | 5 | 0 | 0.07511598 | 2 | 7 | 0.61140001 | 0.43181735 |
| chrX   | 18603611 | 18637171 | 33561  | 2  | 0 | 6 | 0 | 0.129913   | 2 | 7 | 0.61140001 | 0.30102999 |
| chrX   | 18637171 | 18736110 | 98940  | 3  | 0 | 5 | 0 | 0.07511598 | 2 | 7 | 0.61140001 | 0.43181735 |
| chrX   | 18736110 | 18846048 | 109939 | 3  | 0 | 7 | 0 | 0.20469099 | 2 | 7 | 0.61140001 | 0.20469099 |
| chrX   | 18846048 | 18875034 | 29897  | 1  | 0 | 6 | 0 | 0.129913   | 2 | 7 | 0.61140001 | 0.30102999 |
| chrX   | 18875034 | 18923990 | 48957  | 1  | 0 | 6 | 0 | 0.20064824 | 2 | 6 | 0.61140001 | 0.20064824 |
| chrX   | 18923990 | 18981850 | 57861  | 1  | 0 | 5 | 0 | 0.12309572 | 2 | 6 | 0.61140001 | 0.30102999 |
| chrX   | 18981850 | 18981909 | 60     | 1  | 0 | 5 | 0 | 0.07511598 | 2 | 7 | 0.61140001 | 0.43181735 |
| chrX   | 18981909 | 19100827 | 118919 | 3  | 0 | 5 | 0 | 0.07511598 | 1 | 7 | 0.30102999 | 0.43181735 |
| chrX   | 19100827 | 19208040 | 107214 | 3  | 0 | 7 | 0 | 0.20469099 | 1 | 7 | 0.30102999 | 0.20469099 |
| chrX   | 19208040 | 19208099 | 60     | 1  | 0 | 8 | 0 | 0.30102999 | 1 | 7 | 0.30102999 | 0.13499366 |
| chrX   | 19208099 | 19363938 | 155840 | 2  | 0 | 7 | 0 | 0.20469099 | 2 | 7 | 0.30102999 | 0.20469099 |
| chrX   | 19363938 | 19433365 | 69428  | 2  | 0 | 8 | 0 | 0.30102999 | 1 | 7 | 0.30102999 | 0.13499366 |
| chrX   | 19433365 | 19480558 | 47194  | 1  | 0 | 7 | 0 | 0.20469099 | 1 | 7 | 0.30102999 | 0.20469099 |
| chrX   | 19480558 | 19701918 | 212361 | 5  | 0 | 6 | 0 | 0.129913   | 1 | 7 | 0.30102999 | 0.30102999 |
| chrX   | 19701918 | 19735998 | 34081  | 2  | 0 | 7 | 0 | 0.20469099 | 1 | 7 | 0.30102999 | 0.20469099 |
| chrX   | 19735998 | 19813328 | 77331  | 2  | 0 | 6 | 0 | 0.20064824 | 1 | 6 | 0.30102999 | 0.20064824 |
| chrX   | 19813328 | 19904473 | 91146  | 3  | 0 | 7 | 0 | 0.20469099 | 1 | 7 | 0.30102999 | 0.20469099 |
| chrX   | 19904473 | 19948098 | 43626  | 1  | 0 | 6 | 0 | 0.129913   | 1 | 7 | 0.30102999 | 0.30102999 |
| chrX   | 19948098 | 20062553 | 114456 | 3  | 0 | 5 | 0 | 0.07511598 | 0 | 7 | 0          | 0.43181735 |
| chrX   | 20062553 | 20092715 | 30163  | 2  | 0 | 5 | 0 | 0.07511598 | 1 | 7 | 0.30102999 | 0.43181735 |
| chrX   | 20092715 | 20154793 | 62079  | 1  | 0 | 3 | 0 | 0.01598258 | 1 | 7 | 0.30102999 | 0.84395715 |
| chrX   | 20154793 | 20252867 | 98075  | 2  | 0 | 3 | 0 | 0.03070643 | 1 | 6 | 0.30102999 | 0.63695542 |
| chrX   | 20252867 | 20274813 | 21947  | 2  | 0 | 3 | 0 | 0.01598258 | 1 | 7 | 0.30102999 | 0.84395715 |
| chrX   | 20274813 | 20847745 | 572933 | 4  | 0 | 2 | 0 | 0.00493743 | 1 | 7 | 0.30102999 | 1.16581773 |
| chrX   | 20847745 | 21140909 | 293165 | 2  | 0 | 0 | 0 | 0          | 0 | 6 | 0          | 1.95866592 |
| chrX   | 21140909 | 21140968 | 60     | 1  | 0 | 2 | 0 | 0.00493743 | 1 | 7 | 0.30102999 | 1.16581773 |
| chrX   | 21140968 | 21411422 | 270455 | 2  | 0 | 2 | 0 | 0.01053319 | 1 | 6 | 0.30102999 | 0.91219088 |
| chrX   | 21411422 | 21411481 | 60     | 1  | 0 | 2 | 0 | 0.01053319 | 2 | 6 | 0.61140001 | 0.91219088 |
| chrX   | 21411481 | 21581460 | 169980 | 4  | 0 | 2 | 0 | 0.01053319 | 1 | 6 | 0.30102999 | 0.91219088 |
| chrX   | 21581460 | 21642422 | 60963  | 2  | 0 | 3 | 0 | 0.03070643 | 1 | 6 | 0.30102999 | 0.63695542 |
| chrX   | 21642422 | 21673728 | 31307  | 3  | 0 | 3 | 0 | 0.01598258 | 1 | 7 | 0.30102999 | 0.84395715 |
| chrX   | 21673728 | 21761921 | 88194  | 2  | 0 | 2 | 0 | 0.01053319 | 1 | 6 | 0.30102999 | 0.91219088 |
| chrX   | 21761921 | 21896267 | 134347 | 5  | 0 | 3 | 0 | 0.01598258 | 2 | 7 | 0.61140001 | 0.84395715 |
| chrX   | 21896267 | 22000870 | 104604 | 2  | 0 | 3 | 0 | 0.03070643 | 1 | 6 | 0.30102999 | 0.63695542 |
| chrX   | 22000870 | 22050894 | 50025  | 2  | 0 | 3 | 0 | 0.01598258 | 2 | 7 | 0.61140001 | 0.84395715 |
| chrX   | 22050894 | 22078910 | 28017  | 2  | 0 | 5 | 0 | 0.04407651 | 2 | 8 | 0.61140001 | 0.58747015 |
| chrX   | 22078910 | 22132608 | 53699  | 2  | 0 | 3 | 0 | 0.03070643 | 2 | 6 | 0.61140001 | 0.63695542 |
| chrX   | 22132608 | 22166967 | 34360  | 2  | 0 | 5 | 0 | 0.07511598 | 2 | 7 | 0.61140001 | 0.43181735 |
| chrX   | 22166967 | 22428554 | 274588 | 6  | 0 | 5 | 0 | 0.03407651 | 8 | 8 | 0.61140001 | 0.58747015 |
| chrX   | 22428554 | 22518903 | 80350  | 1  | 0 | 5 | 0 | 0.04407651 | 3 | 8 | 0.61140001 | 0.58747015 |
| chrX   | 22518903 | 22568109 | 49207  | 1  | 0 | 5 | 0 | 0.07511598 | 3 | 7 | 0.61140001 | 0.43181735 |
| chrX   | 22568109 | 22752364 | 184256 | 2  | 0 | 5 | 0 | 0.07511598 | 2 | 7 | 0.61140001 | 0.43181735 |
| chrX   | 22752364 | 22836383 | 84020  | 2  | 0 | 7 | 0 | 0.20469099 | 2 | 7 | 0.61140001 | 0.20469099 |
| chrX   | 22836383 | 23018417 | 182035 | 2  | 0 | 4 | 0 | 0.03812622 | 2 | 7 | 0.61140001 | 0.60763643 |
| chrX   | 23018417 | 23093188 | 74772  | 4  | 0 | 6 | 0 | 0.129913   | 2 | 7 | 0.61140001 | 0.30102999 |
| chrX   | 23093188 | 23139837 | 46650  | 3  | 0 | 7 | 0 | 0.07511598 | 2 | 7 | 0.61140001 | 0.43181735 |
| chrX   | 23139837 | 23301682 | 161846 | 3  | 0 | 6 | 0 | 0.129913   | 2 | 7 | 0.61140001 | 0.30102999 |
| chrX   | 23301682 | 23686935 | 385254 | 7  | 0 | 7 | 0 | 0.129913   | 3 | 7 | 0.61140001 | 0.30102999 |
| chrX   | 23686935 | 23731289 | 44355  | 3  | 0 | 5 | 0 | 0.07511598 | 3 | 7 | 0.61140001 | 0.43181735 |
| chrX   | 23731289 | 23926318 | 195030 | 3  | 0 | 4 | 0 | 0.03812622 | 3 | 7 | 0.61140001 | 0.60763643 |
| chrX   | 23926318 | 24001549 | 75232  | 3  | 0 | 5 | 0 | 0.07511598 | 4 | 7 | 1.26272838 | 0.43181735 |
| chrX   | 24001549 | 24165628 | 164080 | 3  | 0 | 4 | 0 | 0.03812622 | 4 | 7 | 1.26272838 | 0.60763643 |
| chrX   | 24165628 | 24228156 | 62529  | 2  | 0 | 4 | 0 | 0.06713722 | 4 | 6 | 1.26272838 | 0.44141547 |
| chrX   | 24228156 | 24228215 | 60     | 1  | 0 | 4 | 0 | 0.03812622 | 4 | 7 | 1.26272838 | 0.60763643 |
| chrX   | 24228215 | 24361166 | 132952 | 2  | 0 | 4 | 0 | 0.06713722 | 3 | 6 | 0.93173516 | 0.44141547 |
| chrX   | 24361166 | 24458508 | 97343  | 3  | 0 | 4 | 0 | 0.03812622 | 4 | 7 | 1.26272838 | 0.60763643 |
| chrX   | 24458508 | 24495317 | 36810  | 1  | 0 | 4 | 0 | 0.03812622 | 3 | 7 | 0.93173516 | 0.60763643 |
| chrX   | 24495317 | 24593364 | 98048  | 3  | 0 | 5 | 0 | 0.07511598 | 3 | 7 | 0.93173516 | 0.43181735 |
| chrX   | 24593364 | 24688933 | 95570  | 2  | 0 | 4 | 0 | 0.06713722 | 3 | 6 | 0.93173516 | 0.44141547 |
| chrX   | 24688933 | 24688992 | 60     | 1  | 0 | 5 | 0 | 0.07511598 | 3 | 7 | 0.93173516 | 0.43181735 |
| chrX   | 24688992 | 24759627 | 70636  | 1  | 0 | 4 | 0 | 0.06713722 | 3 | 6 | 0.93173516 | 0.44141547 |
| chrX   | 24759627 | 24861601 | 101975 | 2  | 0 | 4 | 0 | 0.06713722 | 2 | 6 | 0.61140001 | 0.44141547 |
| chrX   | 24861601 | 25510010 | 648410 | 10 | 0 | 5 | 0 | 0.12309572 | 2 | 6 | 0.61140001 | 0.30102999 |
| chrX   | 25510010 | 25631804 | 121795 | 1  | 0 | 5 | 0 | 0.19510895 | 2 | 5 | 0.61140001 | 0.19510895 |
| chrX   | 25631804 | 25816632 | 184829 | 3  | 0 | 6 | 0 | 0.30102999 | 2 | 5 | 0.61140001 | 0.12309572 |
| chrX   | 25816632 | 25816691 | 60     | 1  | 0 | 7 | 0 | 0.30102999 | 2 | 6 | 0.61140001 | 0.129913   |
| chrX   | 25816691 | 25933166 | 116476 | 1  | 0 | 6 | 0 | 0.44141547 | 2 | 4 | 0.61140001 | 0.06713722 |
| chrX   | 25933166 | 26086104 | 152939 | 1  | 0 | 5 | 0 | 0.30102999 | 2 | 4 | 0.61140001 | 0.11390336 |
| chrX   | 26086104 | 26157488 | 71385  | 2  | 0 | 6 | 0 | 0.44141547 | 2 | 4 | 0.61140001 | 0.06713722 |
| chrX</ |          |          |        |    |   |   |   |            |   |   |            |            |

|      |          |          |        |   |   |    |            |            |   |   |            |            |
|------|----------|----------|--------|---|---|----|------------|------------|---|---|------------|------------|
| chrX | 29301165 | 29488548 | 187384 | 3 | 0 | 7  | 0          | 0.30102999 | 0 | 6 | 0          | 0.129913   |
| chrX | 29488548 | 29513523 | 24976  | 2 | 0 | 7  | 0          | 0.30102999 | 1 | 6 | 0.30102999 | 0.129913   |
| chrX | 29513523 | 29637266 | 123744 | 2 | 0 | 6  | 0          | 0.20064824 | 0 | 6 | 0          | 0.20064824 |
| chrX | 29637266 | 29660848 | 23583  | 2 | 0 | 7  | 0          | 0.30102999 | 0 | 6 | 0          | 0.129913   |
| chrX | 29660848 | 29818244 | 157397 | 4 | 0 | 7  | 0          | 0.30102999 | 2 | 6 | 0.61140001 | 0.129913   |
| chrX | 29818244 | 29908241 | 89998  | 2 | 0 | 4  | 0          | 0.06713722 | 2 | 6 | 0.61140001 | 0.44141547 |
| chrX | 29908241 | 29939431 | 31191  | 2 | 0 | 6  | 0          | 0.20064824 | 2 | 6 | 0.61140001 | 0.20064824 |
| chrX | 29939431 | 29973473 | 34043  | 1 | 0 | 4  | 0          | 0.06713722 | 2 | 6 | 0.61140001 | 0.44141547 |
| chrX | 29973473 | 29973532 | 60     | 1 | 0 | 5  | 0          | 0.12309572 | 2 | 6 | 0.61140001 | 0.30102999 |
| chrX | 29973532 | 30026912 | 53381  | 1 | 0 | 5  | 0          | 0.12309572 | 1 | 6 | 0.30102999 | 0.30102999 |
| chrX | 30026912 | 30162186 | 135275 | 2 | 0 | 3  | 0          | 0.03070643 | 6 | 6 | 0.30102999 | 0.63695542 |
| chrX | 30162186 | 30162245 | 60     | 1 | 0 | 4  | 0          | 0.06713722 | 2 | 6 | 0.61140001 | 0.44141547 |
| chrX | 30162245 | 30444429 | 282185 | 5 | 0 | 4  | 0          | 0.06713722 | 2 | 6 | 0.30102999 | 0.44141547 |
| chrX | 30444429 | 30444488 | 60     | 1 | 0 | 6  | 0          | 0.129913   | 1 | 7 | 0.30102999 | 0.30102999 |
| chrX | 30444488 | 30577533 | 133046 | 2 | 0 | 5  | 0          | 0.07511598 | 1 | 7 | 0.30102999 | 0.43181735 |
| chrX | 30577533 | 30676006 | 98474  | 4 | 0 | 5  | 0          | 0.04407651 | 1 | 8 | 0.30102999 | 0.58747015 |
| chrX | 30676006 | 30715343 | 39338  | 1 | 0 | 5  | 0          | 0.07511598 | 1 | 7 | 0.30102999 | 0.43181735 |
| chrX | 30715343 | 30775402 | 60     | 1 | 0 | 6  | 0          | 0.129913   | 1 | 7 | 0.30102999 | 0.30102999 |
| chrX | 30775402 | 30877804 | 162403 | 4 | 0 | 5  | 0          | 0.07511598 | 1 | 7 | 0.30102999 | 0.43181735 |
| chrX | 30877804 | 30962926 | 85123  | 2 | 0 | 5  | 0          | 0.12309572 | 1 | 6 | 0.30102999 | 0.30102999 |
| chrX | 30962926 | 30962985 | 60     | 1 | 0 | 6  | 0          | 0.07511598 | 1 | 7 | 0.30102999 | 0.43181735 |
| chrX | 30962985 | 31015034 | 52050  | 1 | 0 | 4  | 0          | 0.03812622 | 1 | 7 | 0.30102999 | 0.60763643 |
| chrX | 31015034 | 31102650 | 87617  | 1 | 0 | 4  | 0          | 0.03812622 | 0 | 7 | 0          | 0.60763643 |
| chrX | 31102650 | 31139936 | 37287  | 2 | 0 | 6  | 0          | 0.129913   | 0 | 7 | 0          | 0.30102999 |
| chrX | 31139936 | 31139995 | 60     | 1 | 0 | 6  | 0          | 0.129913   | 1 | 7 | 0.30102999 | 0.30102999 |
| chrX | 31139995 | 31259759 | 119765 | 3 | 0 | 5  | 0          | 0.07511598 | 1 | 7 | 0.30102999 | 0.43181735 |
| chrX | 31259759 | 31333408 | 73650  | 1 | 0 | 5  | 0          | 0.07511598 | 0 | 7 | 0          | 0.43181735 |
| chrX | 31333408 | 31375215 | 41808  | 2 | 0 | 6  | 0          | 0.129913   | 0 | 7 | 0          | 0.30102999 |
| chrX | 31375215 | 31415644 | 40430  | 1 | 0 | 5  | 0          | 0.07511598 | 0 | 7 | 0          | 0.43181735 |
| chrX | 31415644 | 31462722 | 47079  | 2 | 0 | 6  | 0          | 0.129913   | 1 | 7 | 0.30102999 | 0.30102999 |
| chrX | 31462722 | 31462768 | 47     | 1 | 0 | 7  | 0          | 0.20469099 | 1 | 7 | 0.30102999 | 0.20469099 |
| chrX | 31462768 | 31496642 | 33875  | 1 | 0 | 7  | 0          | 0.20469099 | 0 | 7 | 0          | 0.20469099 |
| chrX | 31496642 | 31676105 | 179464 | 5 | 0 | 8  | 0          | 0.30102999 | 0 | 7 | 0          | 0.13499366 |
| chrX | 31676105 | 31715203 | 39099  | 2 | 0 | 9  | 0          | 0.42015402 | 0 | 7 | 0          | 0.08584816 |
| chrX | 31715203 | 31766614 | 51412  | 2 | 0 | 11 | 0          | 0.73110763 | 1 | 7 | 0.30102999 | 0.03037338 |
| chrX | 31766614 | 31766673 | 60     | 1 | 0 | 11 | 0          | 0.55623409 | 1 | 8 | 0.30102999 | 0.05490675 |
| chrX | 31766673 | 31824743 | 58071  | 1 | 0 | 9  | 0          | 0.42015402 | 1 | 7 | 0.30102999 | 0.08584816 |
| chrX | 31824743 | 31893344 | 68602  | 1 | 0 | 9  | 0          | 0.42015402 | 0 | 7 | 0          | 0.08584816 |
| chrX | 31893344 | 31893403 | 60     | 1 | 0 | 11 | 0          | 0.73110763 | 0 | 7 | 0          | 0.03037338 |
| chrX | 31893403 | 31944959 | 51557  | 1 | 0 | 10 | 0          | 0.56314362 | 0 | 7 | 0          | 0.05232577 |
| chrX | 31944959 | 31945018 | 60     | 1 | 0 | 10 | 0          | 0.56314362 | 2 | 7 | 0.61140001 | 0.05232577 |
| chrX | 31945018 | 32014464 | 69447  | 2 | 0 | 9  | 0          | 0.42015402 | 2 | 7 | 0.61140001 | 0.08584816 |
| chrX | 32014464 | 32014523 | 60     | 1 | 0 | 11 | 0          | 0.73110763 | 2 | 7 | 0.61140001 | 0.03037338 |
| chrX | 32014523 | 32129008 | 114486 | 3 | 0 | 9  | 0          | 0.42015402 | 2 | 7 | 0.61140001 | 0.08584816 |
| chrX | 32129008 | 32190220 | 61213  | 2 | 0 | 11 | 0          | 0.73110763 | 2 | 7 | 0.61140001 | 0.03037338 |
| chrX | 32190220 | 32383270 | 193051 | 4 | 0 | 10 | 0          | 0.56314362 | 2 | 7 | 0.61140001 | 0.05232577 |
| chrX | 32383270 | 32383326 | 57     | 1 | 0 | 11 | 0          | 0.73110763 | 2 | 7 | 0.61140001 | 0.03037338 |
| chrX | 32383326 | 32437956 | 54631  | 1 | 0 | 10 | 0          | 0.56314362 | 2 | 7 | 0.61140001 | 0.05232577 |
| chrX | 32437956 | 32466962 | 29007  | 2 | 0 | 11 | 0          | 0.73110763 | 2 | 7 | 0.61140001 | 0.03037338 |
| chrX | 32466962 | 32472715 | 5754   | 2 | 1 | 12 | 0.05404976 | 0.92532268 | 2 | 7 | 0.30102999 | 0.01667721 |
| chrX | 32472715 | 32663243 | 190529 | 5 | 1 | 11 | 0.05404976 | 0.73110763 | 2 | 7 | 0.30102999 | 0.03037338 |
| chrX | 32663243 | 32902300 | 239058 | 6 | 1 | 10 | 0.05404976 | 0.56314362 | 2 | 7 | 0.30102999 | 0.05232577 |
| chrX | 32902300 | 32967915 | 65616  | 2 | 1 | 11 | 0.05404976 | 0.73110763 | 2 | 7 | 0.30102999 | 0.03037338 |
| chrX | 32967915 | 32967974 | 60     | 1 | 0 | 12 | 0.05404976 | 0.92532268 | 2 | 7 | 0.30102999 | 0.01667721 |
| chrX | 32967974 | 33038252 | 70279  | 2 | 1 | 9  | 0.05404976 | 0.42015402 | 2 | 7 | 0.30102999 | 0.08584816 |
| chrX | 33038252 | 33038311 | 60     | 1 | 0 | 12 | 0.05404976 | 0.92532268 | 2 | 7 | 0.30102999 | 0.01667721 |
| chrX | 33038311 | 33108168 | 69858  | 1 | 1 | 11 | 0.05404976 | 0.73110763 | 2 | 7 | 0.30102999 | 0.03037338 |
| chrX | 33108168 | 33146672 | 38505  | 1 | 1 | 9  | 0.05404976 | 0.42015402 | 2 | 7 | 0.30102999 | 0.08584816 |
| chrX | 33146672 | 33183225 | 36554  | 1 | 0 | 9  | 0          | 0.42015402 | 1 | 7 | 0.30102999 | 0.08584816 |
| chrX | 33183225 | 33183284 | 60     | 1 | 0 | 11 | 0          | 0.73110763 | 1 | 7 | 0.30102999 | 0.03037338 |
| chrX | 33183284 | 33287777 | 145494 | 4 | 0 | 10 | 0          | 0.56314362 | 1 | 7 | 0.30102999 | 0.05232577 |
| chrX | 33287777 | 33427981 | 99205  | 2 | 0 | 11 | 0          | 0.73110763 | 2 | 7 | 0.61140001 | 0.03037338 |
| chrX | 33427981 | 33465295 | 37315  | 1 | 0 | 10 | 0          | 0.56314362 | 2 | 7 | 0.61140001 | 0.05232577 |
| chrX | 33465295 | 33718817 | 253523 | 2 | 0 | 8  | 0          | 0.30102999 | 1 | 7 | 0.30102999 | 0.13499366 |
| chrX | 33718817 | 33936518 | 217702 | 1 | 0 | 6  | 0          | 0          | 0 | 7 | 0          | 0.30102999 |
| chrX | 33936518 | 34052722 | 116205 | 1 | 0 | 6  | 0          | 0.20064824 | 0 | 6 | 0          | 0.20064824 |
| chrX | 34052722 | 34052781 | 60     | 1 | 0 | 8  | 0          | 0.42510817 | 0 | 6 | 0          | 0.08122616 |
| chrX | 34052781 | 34148545 | 95765  | 2 | 0 | 7  | 0          | 0.30102999 | 0 | 6 | 0          | 0.129913   |
| chrX | 34148545 | 34197222 | 48678  | 3 | 0 | 8  | 0          | 0.42510817 | 0 | 6 | 0          | 0.08122616 |
| chrX | 34197222 | 34296081 | 98860  | 2 | 0 | 7  | 0          | 0.43181735 | 0 | 5 | 0          | 0.07511598 |
| chrX | 34296081 | 34296140 | 60     | 1 | 0 | 8  | 0          | 0.42510817 | 0 | 6 | 0          | 0.08122616 |
| chrX | 34296140 | 34371982 | 75843  | 1 | 0 | 7  | 0          | 0.30102999 | 0 | 6 | 0          | 0.129913   |
| chrX | 34371982 | 34788781 | 416800 | 6 | 0 | 5  | 0          | 0.30102999 | 0 | 4 | 0          | 0.11390336 |
| chrX | 34788781 | 34898639 | 109859 | 2 | 0 | 5  | 0          | 0.19510895 | 0 | 5 | 0          | 0.19510895 |
| chrX | 34898639 | 35075355 | 176717 | 3 | 0 | 5  | 0          | 0.07511598 | 0 | 5 | 0          | 0.43181735 |
| chrX | 35075355 | 35296972 | 221618 | 3 | 0 | 5  | 0          | 0.04407651 | 0 | 8 | 0          | 0.58747015 |
| chrX | 35296972 | 35680866 | 383895 | 2 | 0 | 5  | 0          | 0.07511598 | 0 | 7 | 0          | 0.43181735 |
| chrX | 35680866 | 35680925 | 60     | 1 | 0 | 7  | 0          | 0.20469099 | 0 | 7 | 0          | 0.20469099 |
| chrX | 35680925 | 35897478 | 216554 | 2 | 0 | 6  | 0          | 0.129913   | 0 | 7 | 0          | 0.30102999 |
| chrX | 35897478 | 36007638 | 110161 | 4 | 0 | 7  | 0          | 0.20469099 | 0 | 7 | 0          | 0.20469099 |
| chrX | 36007638 | 36080050 | 72413  | 2 | 0 | 5  | 0          | 0.12309572 | 0 | 6 | 0          | 0.30102999 |
| chrX | 36080050 | 36270621 | 190572 | 6 | 0 | 7  | 0          | 0.20469099 | 0 | 7 | 0          | 0.20469099 |
| chrX | 36270621 | 36367358 | 96738  | 4 | 0 | 8  | 0          | 0.30102999 | 1 | 7 | 0.30102999 | 0.13499366 |
| chrX | 36367358 | 36419464 | 52107  | 1 | 0 | 7  | 0          | 0.20469099 | 1 | 7 | 0.30102999 | 0.20469099 |
| chrX | 36419464 | 36505008 | 85545  | 1 | 0 | 6  | 0          | 0.20064824 | 1 | 6 | 0.30102999 | 0.20064824 |
| chrX | 36505008 | 36727259 | 222252 | 3 | 0 | 6  | 0          | 0.20064824 | 2 | 6 | 0.61140001 | 0.20064824 |
| chrX | 36727259 | 36918338 | 191080 | 3 | 0 | 7  | 0          | 0.20469099 | 2 | 7 | 0.61140001 | 0.20469099 |
| chrX | 36918338 | 36978139 | 59802  | 2 | 0 | 7  | 0          | 0.20469099 | 3 | 7 | 0.93173516 | 0.20469099 |
| chrX | 36978139 | 37094298 | 116160 | 2 | 0 | 6  | 0          | 0.129913   | 2 | 7 | 0.61140001 | 0.30102999 |
| chrX | 37094298 | 37094357 | 60     | 1 | 0 | 7  | 0          | 0.20469099 | 2 | 7 | 0.61140001 | 0.20469099 |
| chrX | 37094357 | 37207338 | 112982 | 1 | 0 | 6  | 0          | 0.20064824 | 2 | 6 | 0.61140001 | 0.20064824 |
| chrX | 37207338 | 37268906 | 61569  | 3 | 0 | 6  | 0          | 0.20064824 | 2 | 6 | 0.93173516 | 0.20064824 |
| chrX | 37268906 | 37268965 | 60     | 1 | 0 | 7  | 0          | 0.30102999 | 3 | 6 | 0.93173516 | 0.129913   |
| chrX | 37268965 | 37372045 | 103081 | 2 | 0 | 6  | 0          | 0.30102999 | 3 | 5 | 0.93173516 | 0.12309572 |
| chrX | 37372045 | 37423768 | 51724  | 2 | 0 | 6  | 0          | 0.129913   | 3 | 7 | 0.93173516 | 0.30102999 |
| chrX | 37423768 | 37461323 | 37556  | 2 | 0 | 7  | 0          | 0.20469099 | 3 | 7 | 0.93173516 | 0.20469099 |
| chrX | 37461323 | 37496529 | 35207  | 1 | 0 | 7  | 0          | 0.20469099 | 2 | 7 | 0.61140001 | 0.20469099 |
| chrX | 37496529 | 37641460 | 144932 | 3 | 0 | 7  | 0          | 0.30102999 | 2 |   |            |            |

|      |          |          |        |    |   |   |            |            |   |   |            |            |
|------|----------|----------|--------|----|---|---|------------|------------|---|---|------------|------------|
| chrX | 40587990 | 40695229 | 107240 | 3  | 1 | 5 | 0.1218695  | 0.30102999 | 1 | 4 | 0.1218695  | 0.11390336 |
| chrX | 40695229 | 40731037 | 35809  | 2  | 1 | 6 | 0.05404976 | 0.20064824 | 2 | 6 | 0.30102999 | 0.20064824 |
| chrX | 40731037 | 40793456 | 62420  | 1  | 1 | 6 | 0.05404976 | 0.44141547 | 2 | 4 | 0.30102999 | 0.06713722 |
| chrX | 40793456 | 40933611 | 140156 | 1  | 1 | 5 | 0.05404976 | 0.30102999 | 2 | 4 | 0.30102999 | 0.11390336 |
| chrX | 40933611 | 41022032 | 88422  | 2  | 1 | 5 | 0.1218695  | 0.30102999 | 1 | 4 | 0.1218695  | 0.11390336 |
| chrX | 41022032 | 41217112 | 195081 | 1  | 1 | 5 | 0.05404976 | 0.30102999 | 2 | 4 | 0.30102999 | 0.11390336 |
| chrX | 41217112 | 41437803 | 220692 | 6  | 1 | 5 | 0.05404976 | 0.19510895 | 2 | 5 | 0.30102999 | 0.19510895 |
| chrX | 41437803 | 41490203 | 52401  | 1  | 1 | 5 | 0.05404976 | 0.30102999 | 2 | 4 | 0.30102999 | 0.11390336 |
| chrX | 41490203 | 41490262 | 60     | 1  | 1 | 5 | 0.02438896 | 0.30102999 | 3 | 4 | 0.51676182 | 0.11390336 |
| chrX | 41490262 | 41841300 | 351039 | 7  | 1 | 4 | 0.02438896 | 0.30102999 | 3 | 3 | 0.51676182 | 0.10122019 |
| chrX | 41841300 | 41989908 | 148609 | 1  | 4 | 4 | 0.05404976 | 0.30102999 | 2 | 3 | 0.30102999 | 0.10122019 |
| chrX | 41989908 | 42102734 | 112827 | 1  | 0 | 4 | 0          | 0.30102999 | 2 | 3 | 0.61140001 | 0.10122019 |
| chrX | 42102734 | 42181229 | 78496  | 1  | 0 | 4 | 0          | 0.30102999 | 1 | 3 | 0.30102999 | 0.10122019 |
| chrX | 42181229 | 42210744 | 29516  | 2  | 0 | 4 | 0          | 0.18734596 | 1 | 4 | 0.30102999 | 0.18734596 |
| chrX | 42210744 | 42375640 | 164897 | 4  | 1 | 4 | 0          | 0.30102999 | 1 | 3 | 0.30102999 | 0.10122019 |
| chrX | 42375640 | 42529828 | 154189 | 2  | 1 | 5 | 0          | 0.30102999 | 1 | 4 | 0.30102999 | 0.11390336 |
| chrX | 42529828 | 42529887 | 60     | 1  | 0 | 6 | 0          | 0.30102999 | 1 | 5 | 0.30102999 | 0.12309572 |
| chrX | 42529887 | 42600272 | 70386  | 1  | 0 | 4 | 0          | 0.18734596 | 0 | 4 | 0          | 0.18734596 |
| chrX | 42600272 | 42721456 | 121185 | 1  | 0 | 3 | 0          | 0.30102999 | 0 | 2 | 0          | 0.08289318 |
| chrX | 42721456 | 42721513 | 60     | 1  | 0 | 4 | 0          | 0.47744371 | 1 | 2 | 0.30102999 | 0.0429175  |
| chrX | 42721513 | 42892771 | 171257 | 1  | 0 | 4 | 0          | 0.47744371 | 0 | 2 | 0          | 0.0429175  |
| chrX | 42892771 | 43115695 | 222925 | 3  | 0 | 0 | 0          | 0.45545077 | 0 | 3 | 0          | 0.05670724 |
| chrX | 43115695 | 43115754 | 60     | 1  | 0 | 5 | 0          | 0.30102999 | 0 | 1 | 0          | 0.11390336 |
| chrX | 43115754 | 43274029 | 158276 | 2  | 0 | 4 | 0          | 0.18734596 | 0 | 4 | 0          | 0.18734596 |
| chrX | 43274029 | 43359500 | 85472  | 2  | 0 | 4 | 0          | 0.11390336 | 0 | 5 | 0          | 0.30102999 |
| chrX | 43359500 | 43359559 | 60     | 1  | 0 | 5 | 0          | 0.19510895 | 0 | 5 | 0          | 0.19510895 |
| chrX | 43359559 | 43516819 | 157261 | 2  | 0 | 4 | 0          | 0.11390336 | 0 | 5 | 0          | 0.30102999 |
| chrX | 43516819 | 43516878 | 60     | 1  | 0 | 5 | 0          | 0.19510895 | 0 | 5 | 0          | 0.19510895 |
| chrX | 43516878 | 43599360 | 82483  | 2  | 0 | 4 | 0          | 0.11390336 | 0 | 5 | 0          | 0.30102999 |
| chrX | 43599360 | 43698259 | 98900  | 4  | 0 | 5 | 0          | 0.19510895 | 0 | 5 | 0          | 0.19510895 |
| chrX | 43698259 | 43832630 | 134372 | 3  | 0 | 4 | 0          | 0.11390336 | 0 | 5 | 0          | 0.30102999 |
| chrX | 43832630 | 44007856 | 175227 | 3  | 0 | 4 | 0          | 0.06713722 | 0 | 6 | 0          | 0.44141547 |
| chrX | 44007856 | 44094581 | 86726  | 3  | 0 | 4 | 0          | 0.06713722 | 1 | 6 | 0.30102999 | 0.44141547 |
| chrX | 44094581 | 44094640 | 60     | 1  | 0 | 5 | 0          | 0.12309572 | 0 | 6 | 0.30102999 | 0.30102999 |
| chrX | 44094640 | 44198941 | 104302 | 3  | 0 | 4 | 0          | 0.06713722 | 1 | 6 | 0.30102999 | 0.44141547 |
| chrX | 44198941 | 44199000 | 60     | 1  | 0 | 5 | 0          | 0.12309572 | 1 | 6 | 0.30102999 | 0.30102999 |
| chrX | 44199000 | 44375988 | 176989 | 3  | 0 | 4 | 0          | 0.11390336 | 1 | 5 | 0.30102999 | 0.30102999 |
| chrX | 44375988 | 44585094 | 209107 | 4  | 0 | 5 | 0          | 0.19510895 | 1 | 5 | 0.30102999 | 0.19510895 |
| chrX | 44585094 | 44634291 | 41918  | 1  | 0 | 4 | 0          | 0.11390336 | 1 | 5 | 0.30102999 | 0.30102999 |
| chrX | 44634291 | 44703906 | 69616  | 2  | 0 | 5 | 0          | 0.19510895 | 1 | 5 | 0.30102999 | 0.19510895 |
| chrX | 44703906 | 44746783 | 42878  | 1  | 0 | 5 | 0          | 0.30102999 | 1 | 4 | 0.30102999 | 0.11390336 |
| chrX | 44746783 | 44777230 | 30448  | 2  | 0 | 5 | 0          | 0.30102999 | 2 | 4 | 0.61140001 | 0.11390336 |
| chrX | 44777230 | 44777289 | 60     | 1  | 0 | 6 | 0          | 0.20064824 | 2 | 6 | 0.61140001 | 0.20064824 |
| chrX | 44777289 | 44821772 | 44484  | 1  | 0 | 6 | 0          | 0.30102999 | 2 | 5 | 0.61140001 | 0.12309572 |
| chrX | 44821772 | 44856065 | 34294  | 1  | 0 | 5 | 0          | 0.30102999 | 2 | 4 | 0.61140001 | 0.11390336 |
| chrX | 44856065 | 44970889 | 114825 | 2  | 0 | 5 | 0          | 0.45545077 | 2 | 3 | 0.61140001 | 0.05670724 |
| chrX | 44970889 | 45002306 | 31418  | 2  | 0 | 5 | 0          | 0.30102999 | 4 | 4 | 0.61140001 | 0.11390336 |
| chrX | 45002306 | 45002364 | 59     | 1  | 0 | 5 | 0          | 0.19510895 | 2 | 5 | 0.61140001 | 0.19510895 |
| chrX | 45002364 | 45038649 | 36286  | 2  | 0 | 5 | 0          | 0.30102999 | 2 | 4 | 0.61140001 | 0.11390336 |
| chrX | 45038649 | 45059882 | 21234  | 2  | 0 | 5 | 0          | 0.19510895 | 2 | 5 | 0.61140001 | 0.19510895 |
| chrX | 45059882 | 45178321 | 118440 | 1  | 0 | 4 | 0          | 0.30102999 | 3 | 4 | 0.30102999 | 0.10122019 |
| chrX | 45178321 | 45178380 | 60     | 1  | 0 | 4 | 0          | 0.18734596 | 1 | 4 | 0.30102999 | 0.18734596 |
| chrX | 45178380 | 45298891 | 120512 | 1  | 0 | 4 | 0          | 0.30102999 | 1 | 3 | 0.30102999 | 0.10122019 |
| chrX | 45298891 | 45364990 | 66100  | 2  | 0 | 4 | 0          | 0.18734596 | 1 | 4 | 0.30102999 | 0.18734596 |
| chrX | 45364990 | 45598808 | 23819  | 4  | 0 | 5 | 0          | 0.30102999 | 2 | 4 | 0.61140001 | 0.11390336 |
| chrX | 45598808 | 45856542 | 257735 | 6  | 0 | 5 | 0          | 0.30102999 | 3 | 4 | 0.93173516 | 0.11390336 |
| chrX | 45856542 | 45980483 | 123942 | 1  | 0 | 5 | 0          | 0.30102999 | 2 | 4 | 0.61140001 | 0.11390336 |
| chrX | 45980483 | 46130431 | 149949 | 1  | 0 | 5 | 0          | 0.30102999 | 1 | 4 | 0.30102999 | 0.11390336 |
| chrX | 46130431 | 46130490 | 60     | 1  | 0 | 6 | 0          | 0.44141547 | 1 | 4 | 0.30102999 | 0.06713722 |
| chrX | 46130490 | 46309843 | 179354 | 3  | 0 | 5 | 0          | 0.30102999 | 1 | 4 | 0.30102999 | 0.11390336 |
| chrX | 46309843 | 46363189 | 53347  | 5  | 0 | 6 | 0          | 0.44141547 | 1 | 4 | 0.30102999 | 0.06713722 |
| chrX | 46363189 | 46407630 | 44442  | 2  | 0 | 6 | 0          | 0.44141547 | 3 | 4 | 0.93173516 | 0.06713722 |
| chrX | 46407630 | 46786857 | 379228 | 9  | 1 | 6 | 0.02438896 | 0.44141547 | 3 | 4 | 0.51676182 | 0.06713722 |
| chrX | 46786857 | 46884342 | 97486  | 3  | 0 | 7 | 0.02438896 | 0.60763643 | 3 | 4 | 0.51676182 | 0.03812622 |
| chrX | 46884342 | 47002896 | 118555 | 2  | 1 | 4 | 0          | 0.18734596 | 4 | 4 | 0.51676182 | 0.18734596 |
| chrX | 47002896 | 47080160 | 77765  | 6  | 1 | 6 | 0.02438896 | 0.44141547 | 4 | 4 | 0.51676182 | 0.06713722 |
| chrX | 47080160 | 47121570 | 41411  | 7  | 1 | 5 | 0.01091641 | 0.44141547 | 4 | 4 | 0.76005302 | 0.06713722 |
| chrX | 47121570 | 47374391 | 252822 | 2  | 1 | 6 | 0.02438896 | 0.44141547 | 3 | 4 | 0.51676182 | 0.06713722 |
| chrX | 47374391 | 47484349 | 109959 | 3  | 0 | 6 | 0          | 0.44141547 | 3 | 4 | 0.93173516 | 0.06713722 |
| chrX | 47484349 | 47496686 | 12238  | 2  | 0 | 7 | 0.02438896 | 0.43181735 | 3 | 5 | 0.51676182 | 0.07511598 |
| chrX | 47496686 | 47557292 | 60607  | 3  | 0 | 7 | 0          | 0.43181735 | 3 | 5 | 0.93173516 | 0.07511598 |
| chrX | 47557292 | 47557351 | 60     | 1  | 0 | 7 | 0          | 0.30102999 | 3 | 6 | 0.93173516 | 0.129913   |
| chrX | 47557351 | 47679726 | 122376 | 3  | 0 | 7 | 0          | 0.43181735 | 3 | 5 | 0.93173516 | 0.07511598 |
| chrX | 47679726 | 47770309 | 90584  | 3  | 0 | 7 | 0          | 0.30102999 | 3 | 6 | 0.93173516 | 0.129913   |
| chrX | 47770309 | 47842881 | 72573  | 2  | 1 | 7 | 0.02438896 | 0.30102999 | 3 | 6 | 0.51676182 | 0.129913   |
| chrX | 47842881 | 47960553 | 117673 | 2  | 1 | 7 | 0.05404976 | 0.60763643 | 2 | 4 | 0.30102999 | 0.03812622 |
| chrX | 47960553 | 47960608 | 56     | 1  | 1 | 7 | 0.05404976 | 0.30102999 | 2 | 6 | 0.30102999 | 0.129913   |
| chrX | 47960608 | 48074226 | 113619 | 1  | 1 | 7 | 0.1218695  | 0.43181735 | 1 | 5 | 0.1218695  | 0.07511598 |
| chrX | 48074226 | 48204101 | 129876 | 2  | 1 | 7 | 0.1218695  | 0.30102999 | 1 | 6 | 0.1218695  | 0.129913   |
| chrX | 48204101 | 48204160 | 60     | 1  | 1 | 7 | 0.1218695  | 0.13499366 | 8 | 8 | 0.1218695  | 0.30102999 |
| chrX | 48204160 | 48372386 | 168227 | 6  | 0 | 6 | 0          | 0.20064824 | 4 | 6 | 0.30102999 | 0.20064824 |
| chrX | 48372386 | 48458502 | 86117  | 5  | 0 | 6 | 0          | 0.129913   | 1 | 7 | 0.30102999 | 0.30102999 |
| chrX | 48458502 | 48507337 | 48836  | 2  | 0 | 6 | 0          | 0.20064824 | 1 | 6 | 0.30102999 | 0.20064824 |
| chrX | 48507337 | 48584410 | 77074  | 4  | 0 | 6 | 0          | 0.129913   | 1 | 7 | 0.30102999 | 0.30102999 |
| chrX | 48584410 | 48770434 | 186025 | 11 | 0 | 6 | 0          | 0.30102999 | 1 | 5 | 0.30102999 | 0.12309572 |
| chrX | 48770434 | 48770492 | 59     | 1  | 1 | 6 | 0.1218695  | 0.30102999 | 5 | 5 | 0.1218695  | 0.12309572 |
| chrX | 48770492 | 48774901 | 4410   | 2  | 1 | 6 | 0.1218695  | 0.44141547 | 4 | 5 | 0.1218695  | 0.06713722 |
| chrX | 48774901 | 48977436 | 202536 | 8  | 1 | 6 | 0.1218695  | 0.30102999 | 1 | 5 | 0.1218695  | 0.12309572 |
| chrX | 48977436 | 49030948 | 53513  | 4  | 1 | 7 | 0.1218695  | 0.30102999 | 1 | 6 | 0.1218695  | 0.129913   |
| chrX | 49030948 | 49069022 | 38075  | 3  | 1 | 8 | 0.1218695  | 0.4250187  | 1 | 6 | 0.1218695  | 0.08122616 |
| chrX | 49069022 | 49121150 | 52129  | 2  | 1 | 7 | 0.1218695  | 0.30102999 | 1 | 6 | 0.1218695  | 0.129913   |
| chrX | 49121150 | 49134211 | 13062  | 2  | 1 | 8 | 0.1218695  | 0.4250187  | 1 | 6 | 0.1218695  | 0.08122616 |
| chrX | 49134211 | 49371416 | 237206 | 1  | 1 | 7 | 0.1218695  | 0.43181735 | 1 | 5 | 0.1218695  | 0.07511598 |
| chrX | 49371416 | 49395335 | 23920  | 2  | 1 | 7 | 0.1218695  | 0.30102999 | 1 | 6 | 0.1218695  | 0.129913   |
| chrX | 49395335 | 49395394 | 60     | 1  | 1 | 7 | 0.1218695  | 0.20469099 | 1 | 7 | 0.1218695  | 0.2        |

|      |            |          |         |    |   |   |            |            |   |   |            |            |
|------|------------|----------|---------|----|---|---|------------|------------|---|---|------------|------------|
| chrX | 52841226   | 52905114 | 63889   | 3  | 1 | 5 | 0.30102999 | 0.19510895 | 0 | 5 | 0          | 0.19510895 |
| chrX | 52905114   | 52905173 | 60      | 1  | 1 | 5 | 0.1218695  | 0.19510895 | 1 | 5 | 0          | 0.1218695  |
| chrX | 52905173   | 52961214 | 56042   | 1  | 0 | 4 | 0          | 0.18734596 | 1 | 4 | 0          | 0.18734596 |
| chrX | 52961214   | 52961273 | 60      | 1  | 1 | 4 | 0.1218695  | 0.18734596 | 1 | 4 | 0          | 0.1218695  |
| chrX | 52961273   | 53031334 | 70062   | 1  | 0 | 4 | 0          | 0.30102999 | 1 | 3 | 0.30102999 | 0.10122019 |
| chrX | 53031334   | 53031392 | 59      | 1  | 1 | 5 | 0.1218695  | 0.45545077 | 1 | 3 | 0.1218695  | 0.05670724 |
| chrX | 53031392   | 53114400 | 83009   | 3  | 0 | 5 | 0          | 0.45545077 | 1 | 3 | 0.30102999 | 0.05670724 |
| chrX | 53114400   | 53969669 | 855270  | 22 | 2 | 5 | 0.30102999 | 0.45545077 | 1 | 3 | 0.05404976 | 0.05670724 |
| chrX | 53969669   | 54056614 | 86946   | 2  | 1 | 5 | 0.1218695  | 0.45545077 | 1 | 3 | 0.1218695  | 0.05670724 |
| chrX | 54056614   | 54056673 | 60      | 1  | 2 | 5 | 0.1575501  | 0.45545077 | 2 | 3 | 0.1575501  | 0.05670724 |
| chrX | 54056673   | 54097840 | 41168   | 1  | 1 | 5 | 0.05404976 | 0.68214471 | 2 | 2 | 0.30102999 | 0.02162467 |
| chrX | 54097840   | 54097899 | 60      | 1  | 1 | 6 | 0.05404976 | 0.91219088 | 2 | 2 | 0.30102999 | 0.01053319 |
| chrX | 54097899   | 54185700 | 87802   | 2  | 1 | 6 | 0.1218695  | 0.91219088 | 1 | 2 | 0.1218695  | 0.01053319 |
| chrX | 54185700   | 54185759 | 60      | 1  | 1 | 6 | 0.05404976 | 0.91219088 | 2 | 2 | 0.30102999 | 0.01053319 |
| chrX | 54185759   | 54291049 | 105291  | 2  | 1 | 6 | 0.1218695  | 0.91219088 | 1 | 2 | 0.1218695  | 0.01053319 |
| chrX | 54291049   | 54291108 | 60      | 1  | 1 | 6 | 0.05404976 | 0.91219088 | 2 | 2 | 0.30102999 | 0.01053319 |
| chrX | 54291108   | 54562094 | 270587  | 7  | 1 | 5 | 0.1218695  | 0.68214471 | 1 | 2 | 0.1218695  | 0.02162467 |
| chrX | 54562094   | 55084087 | 521994  | 9  | 1 | 4 | 0.1218695  | 0.47744371 | 1 | 2 | 0.1218695  | 0.0429175  |
| chrX | 55084087   | 55123579 | 39493   | 2  | 2 | 4 | 0.30102999 | 0.47744371 | 1 | 2 | 0.05404976 | 0.0429175  |
| chrX | 55123579   | 55180184 | 56066   | 1  | 2 | 3 | 0.30102999 | 0.30102999 | 1 | 2 | 0.05404976 | 0.08289318 |
| chrX | 55180184   | 55180243 | 60      | 1  | 2 | 3 | 0.1575501  | 0.30102999 | 1 | 2 | 0.1575501  | 0.08289318 |
| chrX | 55180243   | 55382119 | 211877  | 3  | 2 | 3 | 0.30102999 | 0.30102999 | 1 | 2 | 0.05404976 | 0.08289318 |
| chrX | 55382119   | 55479633 | 87515   | 3  | 3 | 4 | 0.1575501  | 0.47744371 | 1 | 2 | 0.05404976 | 0.0429175  |
| chrX | 55479633   | 55517989 | 38357   | 1  | 3 | 3 | 0.1575501  | 0.30102999 | 1 | 2 | 0.02438896 | 0.0429175  |
| chrX | 55517989   | 56005532 | 487544  | 7  | 3 | 3 | 0.93173516 | 0.30102999 | 0 | 2 | 0          | 0.08289318 |
| chrX | 56005532   | 56992484 | 986953  | 13 | 1 | 3 | 0.30102999 | 0.30102999 | 0 | 2 | 0          | 0.08289318 |
| chrX | 56992484   | 57100174 | 107691  | 3  | 1 | 5 | 0.30102999 | 0.68214471 | 0 | 2 | 0          | 0.02162467 |
| chrX | 57100174   | 57259659 | 159486  | 2  | 1 | 4 | 0.30102999 | 0.47744371 | 0 | 2 | 0          | 0.0429175  |
| chrX | 57259659   | 57527790 | 268132  | 5  | 1 | 2 | 0.30102999 | 0.1575501  | 0 | 2 | 0          | 0.1575501  |
| chrX | 57527790   | 57527849 | 60      | 1  | 1 | 4 | 0.30102999 | 0.47744371 | 0 | 2 | 0          | 0.0429175  |
| chrX | 57527849   | 57751615 | 223767  | 3  | 0 | 3 | 0          | 0.30102999 | 0 | 2 | 0          | 0.08289318 |
| chrX | 57751615   | 57751674 | 60      | 1  | 0 | 4 | 0          | 0.47744371 | 0 | 2 | 0          | 0.0429175  |
| chrX | 57751674   | 57987522 | 235849  | 4  | 0 | 2 | 0          | 0.1575501  | 0 | 2 | 0          | 0.1575501  |
| chrX | 57987522   | 58051706 | 64185   | 1  | 0 | 2 | 0          | 0.30102999 | 0 | 1 | 0          | 0.05404976 |
| chrX | 58051706   | 58051765 | 60      | 1  | 0 | 3 | 0          | 0.1575501  | 0 | 1 | 0          | 0.02438896 |
| chrX | 58051765   | 62405221 | 4353457 | 6  | 0 | 0 | 0          | 0          | 0 | 1 | 0          | 0.30102999 |
| chrX | 62405221   | 62645308 | 240088  | 9  | 0 | 2 | 0          | 0.08289318 | 0 | 3 | 0          | 0.30102999 |
| chrX | 62645308   | 63006807 | 361500  | 3  | 0 | 3 | 0          | 0.17593012 | 0 | 3 | 0          | 0.17593012 |
| chrX | 63006807   | 63314262 | 307456  | 2  | 0 | 2 | 0          | 0.08289318 | 0 | 3 | 0          | 0.30102999 |
| chrX | 63314262   | 63314321 | 60      | 1  | 1 | 3 | 0.30102999 | 0.17593012 | 0 | 3 | 0          | 0.17593012 |
| chrX | 63314321   | 63366260 | 51940   | 1  | 1 | 2 | 0.30102999 | 0.08289318 | 0 | 3 | 0          | 0.30102999 |
| chrX | 63366260   | 63510019 | 143760  | 5  | 0 | 2 | 0          | 0.08289318 | 0 | 3 | 0          | 0.30102999 |
| chrX | 63510019   | 63510078 | 60      | 1  | 0 | 4 | 0          | 0.18734596 | 0 | 4 | 0          | 0.18734596 |
| chrX | 63510078   | 63644897 | 134820  | 3  | 0 | 3 | 0          | 0.10122019 | 0 | 4 | 0          | 0.30102999 |
| chrX | 63644897   | 63831494 | 186598  | 2  | 0 | 3 | 0          | 0.17593012 | 0 | 3 | 0          | 0.17593012 |
| chrX | 63831494   | 64085656 | 254163  | 4  | 0 | 3 | 0          | 0.10122019 | 0 | 4 | 0          | 0.30102999 |
| chrX | 64085656   | 64140151 | 54496   | 2  | 0 | 4 | 0          | 0.11390336 | 0 | 5 | 0          | 0.30102999 |
| chrX | 64140151   | 64196201 | 56051   | 2  | 0 | 4 | 0          | 0.18734596 | 0 | 4 | 0          | 0.18734596 |
| chrX | 64196201   | 64196260 | 60      | 1  | 0 | 4 | 0          | 0.11390336 | 0 | 5 | 0          | 0.30102999 |
| chrX | 64196260   | 64263556 | 67297   | 2  | 0 | 4 | 0          | 0.18734596 | 0 | 4 | 0          | 0.18734596 |
| chrX | 64263556   | 64263615 | 60      | 1  | 0 | 4 | 0          | 0.11390336 | 0 | 5 | 0          | 0.30102999 |
| chrX | 64263615   | 64483580 | 219966  | 3  | 0 | 4 | 0          | 0.18734596 | 0 | 4 | 0          | 0.18734596 |
| chrX | 64483580   | 64937784 | 454205  | 10 | 0 | 3 | 0          | 0.17593012 | 0 | 3 | 0          | 0.17593012 |
| chrX | 64937784   | 65187631 | 249848  | 5  | 0 | 4 | 0          | 0.18734596 | 0 | 4 | 0          | 0.18734596 |
| chrX | 65187631   | 65272833 | 85203   | 5  | 0 | 4 | 0          | 0.30102999 | 0 | 3 | 0          | 0.10122019 |
| chrX | 65272833   | 65435266 | 162434  | 3  | 0 | 2 | 0          | 0.08289318 | 0 | 3 | 0          | 0.30102999 |
| chrX | 65435266   | 65546880 | 111615  | 2  | 0 | 2 | 0          | 0.1575501  | 0 | 2 | 0          | 0.1575501  |
| chrX | 65546880   | 65605124 | 58245   | 2  | 0 | 3 | 0          | 0.30102999 | 0 | 2 | 0          | 0.08289318 |
| chrX | 65605124   | 65691261 | 86138   | 1  | 0 | 2 | 0          | 0.1575501  | 0 | 2 | 0          | 0.1575501  |
| chrX | 65691261   | 65691320 | 60      | 1  | 0 | 2 | 0          | 0.1575501  | 1 | 2 | 0.30102999 | 0.1575501  |
| chrX | 65691320   | 65857832 | 166513  | 4  | 0 | 2 | 0          | 0.30102999 | 1 | 1 | 0.05404976 | 0.05404976 |
| chrX | 65857832   | 65953240 | 95409   | 3  | 0 | 2 | 0          | 0.1575501  | 1 | 2 | 0.30102999 | 0.1575501  |
| chrX | 65953240   | 65953299 | 60      | 1  | 0 | 2 | 0          | 0.08289318 | 1 | 3 | 0.30102999 | 0.30102999 |
| chrX | 65953299   | 66105563 | 152265  | 1  | 0 | 2 | 0          | 0.1575501  | 1 | 2 | 0.30102999 | 0.1575501  |
| chrX | 66105563   | 66430088 | 324226  | 2  | 0 | 2 | 0          | 0.30102999 | 1 | 1 | 0.30102999 | 0.05404976 |
| chrX | 66430088   | 66576767 | 146680  | 1  | 0 | 2 | 0          | 0.30102999 | 0 | 1 | 0          | 0.05404976 |
| chrX | 66576767   | 66656771 | 80005   | 2  | 0 | 2 | 0          | 0.1575501  | 0 | 2 | 0          | 0.1575501  |
| chrX | 66656771   | 66656830 | 60      | 1  | 0 | 2 | 0          | 0.08289318 | 0 | 3 | 0          | 0.30102999 |
| chrX | 66656830   | 66840883 | 184054  | 3  | 0 | 2 | 0          | 0.1575501  | 0 | 2 | 0          | 0.1575501  |
| chrX | 66840883   | 66905792 | 64910   | 3  | 0 | 3 | 0          | 0.30102999 | 0 | 2 | 0          | 0.08289318 |
| chrX | 66905792   | 67573743 | 667952  | 13 | 0 | 3 | 0          | 0.17593012 | 0 | 3 | 0          | 0.17593012 |
| chrX | 67573743   | 67573802 | 60      | 1  | 0 | 3 | 0          | 0.10122019 | 0 | 4 | 0          | 0.30102999 |
| chrX | 67573802   | 67708713 | 134912  | 3  | 0 | 3 | 0          | 0.17593012 | 0 | 3 | 0          | 0.17593012 |
| chrX | 67708713   | 67738923 | 30211   | 2  | 0 | 3 | 0          | 0.10122019 | 0 | 4 | 0          | 0.30102999 |
| chrX | 67738923   | 67740732 | 1810    | 2  | 0 | 3 | 0          | 0.05670724 | 0 | 5 | 0          | 0.45545077 |
| chrX | 67740732   | 67802941 | 62210   | 1  | 0 | 3 | 0          | 0.10122019 | 0 | 4 | 0          | 0.30102999 |
| chrX | 67802941   | 67896238 | 93298   | 2  | 0 | 2 | 0          | 0.0429175  | 0 | 4 | 0          | 0.47744371 |
| chrX | 67896238   | 67896297 | 60      | 1  | 0 | 3 | 0          | 0.10122019 | 0 | 4 | 0          | 0.30102999 |
| chrX | 67896297   | 67935738 | 39442   | 1  | 0 | 3 | 0          | 0.17593012 | 0 | 3 | 0          | 0.17593012 |
| chrX | 67935738   | 68023044 | 87307   | 2  | 0 | 2 | 0          | 0.08289318 | 0 | 3 | 0          | 0.30102999 |
| chrX | 68023044   | 68055548 | 32505   | 2  | 0 | 2 | 0          | 0.08289318 | 1 | 3 | 0.30102999 | 0.30102999 |
| chrX | 68055548   | 68061899 | 6352    | 3  | 0 | 3 | 0          | 0.17593012 | 1 | 3 | 0.30102999 | 0.17593012 |
| chrX | 68061899   | 68090862 | 28964   | 1  | 0 | 2 | 0          | 0.08289318 | 1 | 3 | 0.30102999 | 0.30102999 |
| chrX | 68090862   | 68271508 | 180647  | 1  | 0 | 2 | 0          | 0.08289318 | 0 | 3 | 0          | 0.30102999 |
| chrX | 68271508   | 68424147 | 152640  | 4  | 0 | 2 | 0          | 0.0429175  | 0 | 4 | 0          | 0.47744371 |
| chrX | 68424147   | 68542048 | 117902  | 2  | 0 | 3 | 0          | 0.10122019 | 0 | 4 | 0          | 0.30102999 |
| chrX | 68542048   | 68542107 | 60      | 1  | 0 | 3 | 0          | 0.10122019 | 1 | 4 | 0.30102999 | 0.30102999 |
| chrX | 68542107   | 68716578 | 174472  | 1  | 0 | 2 | 0          | 0.0429175  | 1 | 4 | 0.30102999 | 0.47744371 |
| chrX | 68716578   | 68736782 | 20205   | 2  | 0 | 2 | 0          | 0.0429175  | 2 | 4 | 0.61140001 | 0.47744371 |
| chrX | 68736782   | 68851654 | 114873  | 2  | 0 | 2 | 0          | 0.08289318 | 2 | 3 | 0.61140001 | 0.30102999 |
| chrX | 68851654   | 68851713 | 60      | 1  | 0 | 3 | 0          | 0.10122019 | 2 | 4 | 0.61140001 | 0.30102999 |
| chrX | 68851713   | 68983106 | 131394  | 3  | 0 | 2 | 0          | 0.08289318 | 2 | 3 | 0.61140001 | 0.30102999 |
| chrX | 68983106   | 68983165 | 60      | 1  | 1 | 2 | 0.05404976 | 0.08289318 | 2 | 3 | 0.30102999 | 0.30102999 |
| chrX | 68983165   | 69034096 | 50932   | 1  | 0 | 2 | 0          | 0.08289318 | 2 | 3 | 0.61140001 | 0.30102999 |
| chrX | 69034096   | 69068382 | 34287   | 2  | 0 | 2 | 0          | 0.10122019 | 2 | 4 | 0.61140001 | 0.30102999 |
| chrX | 69068382   | 69221513 | 153132  | 3  | 0 | 3 | 0          | 0.17593012 | 1 | 3 | 0.30102999 | 0.17593012 |
| chrX | 69221513   | 69221572 | 60      | 1  | 1 | 4 | 0.05404976 | 0.30102999 | 2 | 3 | 0.30102999 | 0.10122019 |
| chrX | 69221572   | 69283454 | 61883   | 2  | 1 | 3 | 0.05404976 | 0.17593012 | 2 | 3 | 0.30102999 | 0.17593012 |
| chrX | 69283454</ |          |         |    |   |   |            |            |   |   |            |            |

|      |          |          |        |   |   |            |            |            |   |   |            |            |
|------|----------|----------|--------|---|---|------------|------------|------------|---|---|------------|------------|
| chrX | 72470713 | 72470764 | 52     | 1 | 2 | 4          | 0.6114001  | 0.06713722 | 0 | 6 | 0          | 0.44141547 |
| chrX | 72470764 | 72562206 | 91443  | 1 | 2 | 4          | 0.6114001  | 0.11390336 | 0 | 5 | 0          | 0.30102999 |
| chrX | 72562206 | 72633733 | 71528  | 1 | 2 | 3          | 0.6114001  | 0.10122019 | 0 | 4 | 0          | 0.30102999 |
| chrX | 72633733 | 72670112 | 36380  | 1 | 1 | 3          | 0.30102999 | 0.10122019 | 0 | 4 | 0          | 0.30102999 |
| chrX | 72670112 | 72670171 | 60     | 1 | 3 | 0.30102999 | 0.05670724 | 0          | 5 | 0 | 0.45545077 |            |
| chrX | 72670171 | 72784396 | 114226 | 2 | 1 | 3          | 0.30102999 | 0.10122019 | 0 | 4 | 0          | 0.30102999 |
| chrX | 72784396 | 72902578 | 118183 | 1 | 1 | 2          | 0.30102999 | 0.08289318 | 0 | 3 | 0          | 0.30102999 |
| chrX | 72902578 | 73002438 | 99861  | 3 | 2 | 2          | 0.6114001  | 0.08289318 | 0 | 3 | 0          | 0.30102999 |
| chrX | 73002438 | 73060797 | 58360  | 2 | 2 | 3          | 0.6114001  | 0.17593012 | 0 | 3 | 0          | 0.17593012 |
| chrX | 73060797 | 73160794 | 99998  | 2 | 2 | 3          | 0.6114001  | 0.10122019 | 0 | 4 | 0          | 0.30102999 |
| chrX | 73160794 | 73222150 | 61357  | 2 | 2 | 4          | 0.6114001  | 0.18734596 | 0 | 4 | 0          | 0.18734596 |
| chrX | 73222150 | 73364181 | 142032 | 4 | 1 | 4          | 0.30102999 | 0.18734596 | 0 | 4 | 0          | 0.18734596 |
| chrX | 73364181 | 73426229 | 62049  | 3 | 1 | 4          | 0.30102999 | 0.11390336 | 0 | 5 | 0          | 0.30102999 |
| chrX | 73426229 | 73439364 | 13136  | 1 | 1 | 4          | 0.30102999 | 0.18734596 | 0 | 4 | 0          | 0.18734596 |
| chrX | 73439364 | 73524652 | 85289  | 5 | 1 | 4          | 0.1218695  | 0.18734596 | 1 | 4 | 0.1218695  | 0.18734596 |
| chrX | 73524652 | 73524711 | 60     | 1 | 1 | 4          | 0.1218695  | 0.06713722 | 1 | 6 | 0.1218695  | 0.44141547 |
| chrX | 73524711 | 73603325 | 78615  | 2 | 1 | 4          | 0.1218695  | 0.18734596 | 1 | 4 | 0.1218695  | 0.18734596 |
| chrX | 73603325 | 73603384 | 60     | 1 | 1 | 4          | 0.1218695  | 0.11390336 | 1 | 5 | 0.1218695  | 0.30102999 |
| chrX | 73603384 | 73753502 | 150119 | 3 | 1 | 4          | 0.30102999 | 0.11390336 | 0 | 5 | 0          | 0.30102999 |
| chrX | 73753502 | 73885506 | 132005 | 4 | 1 | 6          | 0.30102999 | 0.20064824 | 0 | 6 | 0          | 0.20064824 |
| chrX | 73885506 | 73990442 | 104937 | 2 | 1 | 5          | 0.30102999 | 0.12309572 | 0 | 6 | 0          | 0.30102999 |
| chrX | 73990442 | 74131582 | 141141 | 3 | 1 | 7          | 0.30102999 | 0.30102999 | 0 | 6 | 0          | 0.129913   |
| chrX | 74131582 | 74131641 | 60     | 1 | 1 | 7          | 0.30102999 | 0.20469099 | 0 | 7 | 0          | 0.20469099 |
| chrX | 74131641 | 74288939 | 157299 | 2 | 1 | 6          | 0.30102999 | 0.20064824 | 0 | 6 | 0          | 0.20064824 |
| chrX | 74288939 | 74288998 | 60     | 1 | 1 | 6          | 0.30102999 | 0.129913   | 0 | 7 | 0          | 0.30102999 |
| chrX | 74288998 | 74330654 | 41657  | 1 | 0 | 4          | 0          | 0.06713722 | 0 | 6 | 0          | 0.44141547 |
| chrX | 74330654 | 74330713 | 60     | 1 | 0 | 5          | 0          | 0.12309572 | 0 | 6 | 0          | 0.30102999 |
| chrX | 74330713 | 74360681 | 29969  | 1 | 0 | 5          | 0          | 0.19510895 | 0 | 5 | 0          | 0.19510895 |
| chrX | 74360681 | 74420870 | 60190  | 2 | 0 | 6          | 0          | 0.30102999 | 0 | 5 | 0          | 0.12309572 |
| chrX | 74420870 | 74420929 | 60     | 1 | 1 | 6          | 0.30102999 | 0.30102999 | 0 | 5 | 0          | 0.12309572 |
| chrX | 74420929 | 74494014 | 73086  | 1 | 0 | 6          | 0          | 0.30102999 | 0 | 5 | 0          | 0.12309572 |
| chrX | 74494014 | 74523277 | 29264  | 2 | 0 | 6          | 0          | 0.129913   | 0 | 7 | 0          | 0.30102999 |
| chrX | 74523277 | 74579928 | 56652  | 1 | 0 | 6          | 0          | 0.20064824 | 0 | 6 | 0          | 0.20064824 |
| chrX | 74579928 | 74579987 | 60     | 1 | 0 | 7          | 0          | 0.30102999 | 0 | 6 | 0          | 0.129913   |
| chrX | 74579987 | 74698752 | 118766 | 2 | 0 | 6          | 0          | 0.20064824 | 0 | 6 | 0          | 0.20064824 |
| chrX | 74698752 | 74725689 | 26938  | 2 | 0 | 7          | 0          | 0.30102999 | 0 | 6 | 0          | 0.129913   |
| chrX | 74725689 | 74874671 | 148983 | 2 | 0 | 6          | 0          | 0.20064824 | 0 | 6 | 0          | 0.20064824 |
| chrX | 74874671 | 74874730 | 60     | 1 | 0 | 8          | 0          | 0.30102999 | 0 | 7 | 0          | 0.13493966 |
| chrX | 74874730 | 74972331 | 97602  | 1 | 0 | 8          | 0          | 0.4250187  | 0 | 6 | 0          | 0.08122616 |
| chrX | 74972331 | 75344302 | 371972 | 6 | 0 | 7          | 0          | 0.30102999 | 0 | 6 | 0          | 0.129913   |
| chrX | 75344302 | 75344361 | 60     | 1 | 0 | 7          | 0          | 0.20469099 | 0 | 7 | 0          | 0.20469099 |
| chrX | 75344361 | 75466837 | 122477 | 3 | 0 | 7          | 0          | 0.30102999 | 0 | 6 | 0          | 0.129913   |
| chrX | 75466837 | 75629052 | 162216 | 1 | 0 | 6          | 0          | 0.30102999 | 0 | 5 | 0          | 0.12309572 |
| chrX | 75629052 | 75650985 | 21934  | 3 | 0 | 6          | 0          | 0.20064824 | 0 | 6 | 0          | 0.20064824 |
| chrX | 75650985 | 75956007 | 305023 | 2 | 0 | 4          | 0          | 0.06713722 | 0 | 6 | 0          | 0.44141547 |
| chrX | 75956007 | 76151778 | 195772 | 4 | 0 | 3          | 0          | 0.17593012 | 0 | 3 | 0          | 0.17593012 |
| chrX | 76151778 | 76227817 | 76040  | 3 | 0 | 4          | 0          | 0.30102999 | 0 | 3 | 0          | 0.10122019 |
| chrX | 76227817 | 76635050 | 407234 | 1 | 0 | 3          | 0          | 0.30102999 | 0 | 2 | 0          | 0.08289318 |
| chrX | 76635050 | 76635109 | 60     | 1 | 0 | 4          | 0          | 0.18734596 | 0 | 4 | 0          | 0.18734596 |
| chrX | 76635109 | 77001972 | 366864 | 2 | 0 | 2          | 0          | 0.30102999 | 1 | 1 | 0.05404976 | 0.05404976 |
| chrX | 77001972 | 77002031 | 60     | 1 | 0 | 4          | 0          | 0.18734596 | 0 | 4 | 0          | 0.18734596 |
| chrX | 77002031 | 77367904 | 365874 | 3 | 0 | 2          | 0          | 0.1575501  | 0 | 2 | 0          | 0.1575501  |
| chrX | 77367904 | 77371230 | 3327   | 3 | 0 | 4          | 0          | 0.11390336 | 0 | 5 | 0          | 0.30102999 |
| chrX | 77371230 | 77378600 | 7371   | 2 | 0 | 4          | 0          | 0.18734596 | 0 | 4 | 0          | 0.18734596 |
| chrX | 77378600 | 77379709 | 1110   | 2 | 0 | 4          | 0          | 0.11390336 | 0 | 5 | 0          | 0.30102999 |
| chrX | 77379709 | 77529011 | 149303 | 2 | 0 | 3          | 0          | 0.10122019 | 0 | 4 | 0          | 0.30102999 |
| chrX | 77529011 | 77569786 | 40776  | 2 | 0 | 5          | 0          | 0.30102999 | 0 | 4 | 0          | 0.11390336 |
| chrX | 77569786 | 7778351  | 208566 | 2 | 0 | 3          | 0          | 0.10122019 | 0 | 4 | 0          | 0.30102999 |
| chrX | 7778351  | 78203258 | 424908 | 6 | 0 | 4          | 0          | 0.11390336 | 0 | 5 | 0          | 0.30102999 |
| chrX | 78203258 | 78426724 | 223467 | 5 | 0 | 7          | 0          | 0.07511598 | 0 | 7 | 0          | 0.43181735 |
| chrX | 78426724 | 78621500 | 194777 | 2 | 0 | 5          | 0          | 0.19510895 | 0 | 5 | 0          | 0.19510895 |
| chrX | 78621500 | 78622836 | 1337   | 2 | 0 | 5          | 0          | 0.07511598 | 0 | 7 | 0          | 0.43181735 |
| chrX | 78622836 | 78700608 | 77773  | 1 | 0 | 5          | 0          | 0.12309572 | 0 | 6 | 0          | 0.30102999 |
| chrX | 78700608 | 78970992 | 270385 | 2 | 0 | 4          | 0          | 0.06713722 | 0 | 6 | 0          | 0.44141547 |
| chrX | 78970992 | 78971051 | 60     | 1 | 0 | 5          | 0          | 0.07511598 | 0 | 7 | 0          | 0.43181735 |
| chrX | 78971051 | 79115606 | 144536 | 1 | 0 | 5          | 0          | 0.01598258 | 0 | 6 | 0          | 0.84395715 |
| chrX | 79115606 | 79115665 | 60     | 1 | 1 | 5          | 0.30102999 | 0.07511598 | 0 | 7 | 0          | 0.43181735 |
| chrX | 79115665 | 79502672 | 387008 | 3 | 1 | 3          | 0.30102999 | 0.01598258 | 0 | 7 | 0          | 0.84395715 |
| chrX | 79502672 | 79502731 | 60     | 1 | 1 | 4          | 0.1218695  | 0.03812622 | 1 | 7 | 0.1218695  | 0.60763643 |
| chrX | 79502731 | 79545370 | 42640  | 1 | 1 | 3          | 0.1218695  | 0.01598258 | 1 | 7 | 0.1218695  | 0.84395715 |
| chrX | 79545370 | 79678199 | 132830 | 2 | 1 | 3          | 0.1218695  | 0.03070643 | 1 | 6 | 0.1218695  | 0.63695542 |
| chrX | 79678199 | 79678258 | 60     | 1 | 1 | 4          | 0.1218695  | 0.06713722 | 1 | 6 | 0.1218695  | 0.44141547 |
| chrX | 79678258 | 79699034 | 20777  | 2 | 1 | 4          | 0.1218695  | 0.11390336 | 1 | 5 | 0.1218695  | 0.30102999 |
| chrX | 79699034 | 79975010 | 275977 | 6 | 1 | 4          | 0.1218695  | 0.06713722 | 1 | 6 | 0.1218695  | 0.44141547 |
| chrX | 79975010 | 80306489 | 331480 | 7 | 1 | 5          | 0.1218695  | 0.12309572 | 1 | 6 | 0.1218695  | 0.30102999 |
| chrX | 80306489 | 80306548 | 60     | 1 | 2 | 5          | 0.30102999 | 0.12309572 | 1 | 6 | 0.05404976 | 0.30102999 |
| chrX | 80306548 | 80370112 | 63565  | 3 | 1 | 3          | 0.30102999 | 0.03070643 | 1 | 6 | 0.05404976 | 0.63695542 |
| chrX | 80370112 | 80512192 | 142081 | 4 | 2 | 3          | 0.30102999 | 0.01598258 | 1 | 7 | 0.05404976 | 0.84395715 |
| chrX | 80512192 | 80677126 | 164935 | 4 | 2 | 4          | 0.30102999 | 0.03812622 | 1 | 7 | 0.05404976 | 0.60763643 |
| chrX | 80677126 | 80842375 | 165250 | 1 | 1 | 4          | 0.1218695  | 0.03812622 | 1 | 7 | 0.1218695  | 0.60763643 |
| chrX | 80842375 | 80842434 | 60     | 1 | 1 | 4          | 0.1218695  | 0.02074938 | 1 | 8 | 0.1218695  | 0.79906872 |
| chrX | 80842434 | 80955599 | 113166 | 1 | 1 | 4          | 0.1218695  | 0.03812622 | 1 | 7 | 0.1218695  | 0.60763643 |
| chrX | 80955599 | 81150323 | 194725 | 2 | 1 | 2          | 0.1218695  | 0.01053319 | 1 | 6 | 0.1218695  | 0.91219088 |
| chrX | 81150323 | 81150382 | 60     | 1 | 1 | 4          | 0.1218695  | 0.06713722 | 1 | 6 | 0.1218695  | 0.44141547 |
| chrX | 81150382 | 81256808 | 106427 | 1 | 1 | 3          | 0.1218695  | 0.10122019 | 1 | 4 | 0.1218695  | 0.30102999 |
| chrX | 81256808 | 81256867 | 60     | 1 | 1 | 3          | 0.1218695  | 0.03070643 | 1 | 4 | 0.1218695  | 0.63695542 |
| chrX | 81256867 | 81330737 | 73871  | 1 | 1 | 1          | 0.1218695  | 0.01091641 | 1 | 6 | 0.1218695  | 0.76005302 |
| chrX | 81330737 | 81466715 | 135979 | 2 | 1 | 1          | 0.1218695  | 0.00478973 | 1 | 5 | 0.1218695  | 1.02643191 |
| chrX | 81466715 | 81466774 | 60     | 1 | 1 | 3          | 0.1218695  | 0.03070643 | 1 | 6 | 0.1218695  | 0.63695542 |
| chrX | 81466774 | 81686497 | 219724 | 2 | 1 | 2          | 0.1218695  | 0.01053319 | 1 | 6 | 0.1218695  | 0.91219088 |
| chrX | 81686497 | 81749209 | 62713  | 2 | 1 | 3          | 0.1218695  | 0.01598258 | 1 | 7 | 0.1218695  | 0.84395715 |
| chrX | 81749209 | 81810657 | 61449  | 1 | 1 | 2          | 0.1218695  | 0.00493743 | 1 | 7 | 0.1218695  | 1.16581773 |
| chrX | 81810657 | 81908432 | 97776  | 2 | 1 | 3          | 0.1218695  | 0.01598258 | 1 | 7 | 0.1218695  | 0.84395715 |
| chrX | 81908432 | 81908491 | 60     | 1 | 1 | 4          | 0.1218695  | 0.03812622 | 1 | 7 | 0.1218695  | 0.60763643 |
| chrX | 81908491 | 82119174 | 210684 | 2 | 1 | 3          | 0.1218695  | 0.01598258 | 1 | 7 | 0.1218695  | 0.84395715 |
| chrX | 82119174 | 82166192 | 47019  | 1 | 1 | 3          | 0.1218695  | 0.03070643 | 1 | 6 | 0.1218695  | 0.63695542 |
| chrX | 82166192 | 82255507 | 89316  | 2 | 1 | 4          | 0.1218695  | 0.06713722 | 1 | 7 | 0.1218695  | 0.44141547 |
| chrX | 8        |          |        |   |   |            |            |            |   |   |            |            |

|      |          |          |        |   |   |   |            |            |   |   |            |            |            |
|------|----------|----------|--------|---|---|---|------------|------------|---|---|------------|------------|------------|
| chrX | 84286981 | 84340764 | 53784  | 1 | 1 | 5 | 0.1218695  | 0.04407651 | 1 | 8 | 0.1218695  | 0.58747015 |            |
| chrX | 84340764 | 84340823 | 60     | 1 | 2 | 6 | 0.1575501  | 0.08122616 | 2 | 8 | 0.1575501  | 0.4250187  |            |
| chrX | 84340823 | 84432562 | 91740  | 1 | 2 | 4 | 0.1575501  | 0.02074938 | 2 | 8 | 0.1575501  | 0.79906872 |            |
| chrX | 84432562 | 84510647 | 78086  | 1 | 1 | 4 | 0.1218695  | 0.03812622 | 1 | 7 | 0.1218695  | 0.60763643 |            |
| chrX | 84510647 | 84535775 | 25129  | 2 | 1 | 8 | 0.1218695  | 0.30102999 | 2 | 1 | 7          | 0.1218695  | 0.13499366 |
| chrX | 84535775 | 84544575 | 8801   | 2 | 1 | 8 | 0.1218695  | 0.20764654 | 1 | 8 | 0.1218695  | 0.20764654 |            |
| chrX | 84544575 | 84590110 | 45536  | 1 | 1 | 7 | 0.1218695  | 0.13499366 | 1 | 8 | 0.1218695  | 0.30102999 |            |
| chrX | 84590110 | 84635365 | 45256  | 2 | 1 | 7 | 0.05404976 | 0.13499366 | 2 | 8 | 0.30102999 | 0.30102999 |            |
| chrX | 84635365 | 84635424 | 60     | 1 | 1 | 8 | 0.05404976 | 0.13872638 | 2 | 9 | 0.30102999 | 0.30102999 |            |
| chrX | 84635424 | 84805702 | 170279 | 1 | 1 | 8 | 0.1218695  | 0.20764654 | 1 | 8 | 0.1218695  | 0.20764654 |            |
| chrX | 84805702 | 85089328 | 283627 | 2 | 1 | 7 | 0.1218695  | 0.13499366 | 2 | 1 | 8          | 0.1218695  | 0.30102999 |
| chrX | 85089328 | 85162661 | 73334  | 5 | 1 | 9 | 0.1218695  | 0.30102999 | 5 | 1 | 8          | 0.1218695  | 0.13872638 |
| chrX | 85162661 | 85527762 | 365102 | 9 | 1 | 8 | 0.1218695  | 0.20764654 | 9 | 1 | 8          | 0.1218695  | 0.20764654 |
| chrX | 85527762 | 85627509 | 99748  | 2 | 1 | 7 | 0.1218695  | 0.13499366 | 2 | 1 | 8          | 0.1218695  | 0.30102999 |
| chrX | 85627509 | 85819982 | 192474 | 4 | 1 | 6 | 0.1218695  | 0.08122616 | 4 | 1 | 8          | 0.1218695  | 0.4250187  |
| chrX | 85819982 | 85820041 | 60     | 1 | 1 | 7 | 0.1218695  | 0.13499366 | 1 | 8 | 0.1218695  | 0.30102999 |            |
| chrX | 85820041 | 85970746 | 150706 | 3 | 1 | 6 | 0.1218695  | 0.08122616 | 3 | 1 | 8          | 0.1218695  | 0.4250187  |
| chrX | 85970746 | 86021882 | 51137  | 2 | 1 | 7 | 0.1218695  | 0.13499366 | 2 | 1 | 8          | 0.1218695  | 0.30102999 |
| chrX | 86021882 | 86144097 | 122216 | 3 | 1 | 6 | 0.1218695  | 0.08122616 | 3 | 1 | 8          | 0.1218695  | 0.4250187  |
| chrX | 86144097 | 86204407 | 57311  | 1 | 1 | 5 | 0.1218695  | 0.04407651 | 1 | 7 | 0.1218695  | 0.58747015 |            |
| chrX | 86204407 | 86428594 | 227138 | 2 | 1 | 1 | 0.1218695  | 0.07511598 | 2 | 1 | 7          | 0.1218695  | 0.43181735 |
| chrX | 86428594 | 86580837 | 152244 | 1 | 0 | 4 | 0          | 0          | 1 | 6 | 0.30102999 | 0.44141547 |            |
| chrX | 86580837 | 86959930 | 379094 | 6 | 0 | 3 | 0          | 0          | 6 | 0 | 0.30102999 | 0.63695542 |            |
| chrX | 86959930 | 87052326 | 92397  | 1 | 0 | 3 | 0          | 0.05670724 | 1 | 5 | 0.30102999 | 0.45545077 |            |
| chrX | 87052326 | 87335768 | 283443 | 2 | 0 | 3 | 0          | 0.17593012 | 1 | 3 | 0.30102999 | 0.17593012 |            |
| chrX | 87335768 | 87679812 | 344045 | 4 | 0 | 3 | 0          | 0.10122019 | 4 | 1 | 6          | 0.30102999 | 0.30102999 |
| chrX | 87679812 | 87679871 | 60     | 1 | 0 | 3 | 0          | 0.05670724 | 1 | 5 | 0.30102999 | 0.45545077 |            |
| chrX | 87679871 | 87794758 | 114888 | 1 | 0 | 3 | 0          | 0.17593012 | 1 | 3 | 0.30102999 | 0.17593012 |            |
| chrX | 87794758 | 87897630 | 102873 | 1 | 0 | 3 | 0          | 0.17593012 | 0 | 3 | 0          | 0.17593012 |            |
| chrX | 87897630 | 87897689 | 60     | 1 | 0 | 3 | 0          | 0.10122019 | 0 | 4 | 0          | 0.30102999 | 0.30102999 |
| chrX | 87897689 | 88305522 | 407834 | 3 | 0 | 1 | 0          | 0.1218695  | 0 | 1 | 0          | 0.1218695  | 0.1218695  |
| chrX | 88305522 | 88305581 | 60     | 1 | 0 | 2 | 0          | 0.1575501  | 0 | 2 | 0          | 0.1575501  | 0.1575501  |
| chrX | 91504849 | 91519622 | 14774  | 2 | 0 | 2 | 0.30102999 | 0.1575501  | 2 | 0 | 2          | 0          | 0.1575501  |
| chrX | 91880615 | 92377119 | 496505 | 2 | 0 | 0 | 0          | 0          | 0 | 1 | 0          | 0.30102999 | 0.30102999 |
| chrX | 92377119 | 92377178 | 60     | 1 | 1 | 2 | 0.30102999 | 0.0429175  | 0 | 4 | 0          | 0.47744371 | 0.47744371 |
| chrX | 92377178 | 92489472 | 112295 | 1 | 2 | 0 | 0.30102999 | 0.08289318 | 0 | 3 | 0          | 0.30102999 | 0.30102999 |
| chrX | 92489472 | 92489531 | 60     | 1 | 1 | 2 | 0.05404976 | 0.08289318 | 2 | 3 | 0.30102999 | 0.30102999 |            |
| chrX | 92489531 | 92665568 | 176038 | 3 | 0 | 2 | 0          | 0.30102999 | 0 | 1 | 0          | 0.05404976 | 0.05404976 |
| chrX | 92665568 | 93177456 | 511889 | 8 | 0 | 2 | 0          | 0.0429175  | 0 | 4 | 0          | 0.47744371 | 0.47744371 |
| chrX | 93177456 | 93177515 | 60     | 1 | 0 | 3 | 0          | 0.10122019 | 0 | 4 | 0          | 0.30102999 | 0.30102999 |
| chrX | 93177515 | 93382608 | 205094 | 2 | 0 | 2 | 0          | 0.0429175  | 0 | 4 | 0          | 0.47744371 | 0.47744371 |
| chrX | 93382608 | 93470236 | 87629  | 2 | 1 | 2 | 0.30102999 | 0.0429175  | 2 | 4 | 0          | 0.47744371 | 0.47744371 |
| chrX | 93470236 | 93831445 | 361210 | 4 | 0 | 2 | 0          | 0.0429175  | 0 | 4 | 0          | 0.47744371 | 0.47744371 |
| chrX | 93831445 | 93887108 | 55664  | 2 | 1 | 2 | 0.30102999 | 0.0429175  | 2 | 4 | 0          | 0.47744371 | 0.47744371 |
| chrX | 93887108 | 94166791 | 279684 | 2 | 0 | 1 | 0          | 0.02438896 | 0 | 3 | 0          | 0.51676182 | 0.51676182 |
| chrX | 94166791 | 94315189 | 148399 | 3 | 1 | 3 | 0.30102999 | 0.17593012 | 3 | 0 | 0          | 0.17593012 | 0.17593012 |
| chrX | 94315189 | 94376002 | 60814  | 2 | 1 | 3 | 0.30102999 | 0.05670724 | 2 | 5 | 0          | 0.45545077 | 0.45545077 |
| chrX | 94376002 | 94478642 | 102641 | 1 | 0 | 3 | 0          | 0.17593012 | 0 | 3 | 0          | 0.17593012 | 0.17593012 |
| chrX | 94478642 | 94599153 | 120512 | 1 | 0 | 3 | 0          | 0.30102999 | 0 | 2 | 0          | 0.08289318 | 0.08289318 |
| chrX | 94599153 | 94817207 | 218055 | 3 | 0 | 3 | 0.30102999 | 0.30102999 | 3 | 2 | 0          | 0.08289318 | 0.08289318 |
| chrX | 94817207 | 94817266 | 60     | 1 | 1 | 3 | 0.30102999 | 0.10122019 | 1 | 4 | 0          | 0.30102999 | 0.30102999 |
| chrX | 94817266 | 94980390 | 163125 | 2 | 0 | 3 | 0          | 0.17593012 | 0 | 3 | 0          | 0.17593012 | 0.17593012 |
| chrX | 94980390 | 94980449 | 60     | 1 | 1 | 3 | 0.30102999 | 0.17593012 | 0 | 3 | 0          | 0.17593012 | 0.17593012 |
| chrX | 94980449 | 95133615 | 153167 | 1 | 0 | 1 | 0          | 0.02438896 | 0 | 3 | 0          | 0.51676182 | 0.51676182 |
| chrX | 95133615 | 95257105 | 123491 | 2 | 0 | 1 | 0          | 0.02438896 | 0 | 3 | 0.30102999 | 0.51676182 | 0.51676182 |
| chrX | 95257105 | 95498487 | 241383 | 4 | 1 | 3 | 0.1218695  | 0.10122019 | 4 | 1 | 4          | 0.1218695  | 0.30102999 |
| chrX | 95498487 | 95498546 | 60     | 1 | 1 | 3 | 0.1218695  | 0.05670724 | 1 | 5 | 0.1218695  | 0.45545077 | 0.45545077 |
| chrX | 95498546 | 95664659 | 166114 | 2 | 1 | 3 | 0.1218695  | 0.08289318 | 2 | 3 | 0.1218695  | 0.30102999 | 0.30102999 |
| chrX | 95664659 | 95664718 | 60     | 1 | 1 | 3 | 0.1218695  | 0.05670724 | 1 | 5 | 0.1218695  | 0.45545077 | 0.45545077 |
| chrX | 95664718 | 95781217 | 116500 | 1 | 1 | 3 | 0.1218695  | 0.10122019 | 1 | 4 | 0.1218695  | 0.30102999 | 0.30102999 |
| chrX | 95781217 | 95781276 | 60     | 1 | 1 | 3 | 0.05404976 | 0.10122019 | 2 | 4 | 0.30102999 | 0.30102999 | 0.30102999 |
| chrX | 95781276 | 95890069 | 108794 | 1 | 1 | 3 | 0.1218695  | 0.10122019 | 1 | 4 | 0.1218695  | 0.30102999 | 0.30102999 |
| chrX | 95890069 | 96048052 | 157984 | 4 | 1 | 3 | 0.1218695  | 0.03070643 | 4 | 6 | 0.1218695  | 0.63695542 | 0.63695542 |
| chrX | 96048052 | 96396802 | 348751 | 7 | 1 | 3 | 0.1218695  | 0.05670724 | 7 | 5 | 0.1218695  | 0.45545077 | 0.45545077 |
| chrX | 96396802 | 96468456 | 71635  | 2 | 1 | 3 | 0.1218695  | 0.10122019 | 2 | 4 | 0.1218695  | 0.30102999 | 0.30102999 |
| chrX | 96468456 | 96529904 | 161449 | 5 | 1 | 4 | 0.1218695  | 0.05670724 | 5 | 1 | 5          | 0.45545077 | 0.45545077 |
| chrX | 96529904 | 96629963 | 60     | 1 | 1 | 4 | 0          | 0.13902336 | 1 | 5 | 0.1218695  | 0.30102999 | 0.30102999 |
| chrX | 96629963 | 96693948 | 63986  | 1 | 1 | 2 | 0.1218695  | 0.02162467 | 1 | 5 | 0.1218695  | 0.68214471 | 0.68214471 |
| chrX | 96693948 | 96759907 | 65960  | 2 | 1 | 1 | 0.1218695  | 0.10533319 | 2 | 6 | 0.1218695  | 0.91219088 | 0.91219088 |
| chrX | 96759907 | 96759966 | 60     | 1 | 1 | 4 | 0.1218695  | 0.06713722 | 1 | 6 | 0.1218695  | 0.44141547 | 0.44141547 |
| chrX | 96759966 | 96856211 | 96246  | 2 | 1 | 2 | 0.1218695  | 0.10533319 | 2 | 6 | 0.1218695  | 0.91219088 | 0.91219088 |
| chrX | 96856211 | 96975311 | 119101 | 2 | 1 | 4 | 0.1218695  | 0.06713722 | 2 | 6 | 0.1218695  | 0.44141547 | 0.44141547 |
| chrX | 96975311 | 96975370 | 60     | 1 | 1 | 6 | 0.05404976 | 0.129913   | 7 | 7 | 0.30102999 | 0.30102999 | 0.30102999 |
| chrX | 96975370 | 97139856 | 164487 | 2 | 1 | 2 | 0.1218695  | 0.00493743 | 2 | 7 | 0.1218695  | 1.16581773 | 1.16581773 |
| chrX | 97139856 | 97139915 | 60     | 1 | 1 | 4 | 0.1218695  | 0.03812622 | 4 | 7 | 0.1218695  | 0.60763643 | 0.60763643 |
| chrX | 97139915 | 97235458 | 95544  | 1 | 1 | 4 | 0.1218695  | 0.18734596 | 1 | 4 | 0.1218695  | 0.18734596 | 0.18734596 |
| chrX | 97235458 | 97394622 | 159165 | 1 | 1 | 4 | 0.1218695  | 0.30102999 | 1 | 3 | 0.1218695  | 0.10122019 | 0.10122019 |
| chrX | 97394622 | 97481233 | 86612  | 1 | 0 | 3 | 0          | 0.17593012 | 1 | 3 | 0.30102999 | 0.17593012 | 0.17593012 |
| chrX | 97481233 | 97481292 | 60     | 1 | 0 | 3 | 0          | 0.10122019 | 1 | 4 | 0.30102999 | 0.30102999 | 0.30102999 |
| chrX | 97481292 | 97624055 | 142764 | 1 | 0 | 3 | 0          | 0.17593012 | 0 | 3 | 0          | 0.17593012 | 0.17593012 |
| chrX | 97624055 | 97718507 | 94453  | 3 | 0 | 3 | 0          | 0.10122019 | 0 | 4 | 0          | 0.30102999 | 0.30102999 |
| chrX | 97718507 | 97718566 | 60     | 1 | 1 | 3 | 0.30102999 | 0.03070643 | 0 | 6 | 0          | 0.63695542 | 0.63695542 |
| chrX | 97718566 | 97855688 | 137123 | 1 | 0 | 1 | 0          | 0.1218695  | 0 | 1 | 0          | 0.1218695  | 0.1218695  |
| chrX | 97855688 | 97984949 | 129262 | 1 | 0 | 0 | 0          | 0          | 0 | 0 | 0          | 0.30102999 | 0.30102999 |
| chrX | 97984949 | 98131123 | 146175 | 2 | 0 | 1 | 0          | 0.1218695  | 0 | 1 | 0          | 0.1218695  | 0.1218695  |
| chrX | 98131123 | 98228517 | 97395  | 2 | 0 | 2 | 0          | 0.02162467 | 0 | 5 | 0          | 0.68214471 | 0.68214471 |
| chrX | 98228517 | 98471283 | 242767 | 2 | 0 | 2 | 0          | 0.0429175  | 0 | 4 | 0          | 0.47744371 | 0.47744371 |
| chrX | 98471283 | 98710592 | 239110 | 2 | 0 | 2 | 0          | 0.0429175  | 1 | 4 | 0.30102999 | 0.47744371 | 0.47744371 |
| chrX | 98710592 | 98710651 | 60     | 1 | 2 |   |            |            |   |   |            |            |            |



|      |           |           |        |    |   |   |            |            |   |   |            |             |
|------|-----------|-----------|--------|----|---|---|------------|------------|---|---|------------|-------------|
| chrX | 101751080 | 101857995 | 106916 | 3  | 2 | 3 | 0.30102999 | 0.05670724 | 1 | 5 | 0.05404976 | 0.45545077  |
| chrX | 101857995 | 101858054 | 60     | 1  | 2 | 5 | 0.30102999 | 0.12309572 | 1 | 6 | 0.05404976 | 0.30102999  |
| chrX | 101858054 | 101913265 | 55212  | 1  | 2 | 4 | 0.30102999 | 0.11390336 | 1 | 5 | 0.05404976 | 0.30102999  |
| chrX | 101913265 | 101913324 | 60     | 1  | 2 | 4 | 0.30102999 | 0.06713722 | 1 | 6 | 0.05404976 | 0.44141547  |
| chrX | 101913324 | 101970749 | 57426  | 2  | 2 | 4 | 0.30102999 | 0.18734596 | 1 | 4 | 0.05404976 | 0.18734596  |
| chrX | 101970749 | 101972813 | 2065   | 2  | 2 | 4 | 0.1575501  | 0.06713722 | 2 | 6 | 0.1575501  | 0.44141547  |
| chrX | 101972813 | 102051788 | 78976  | 2  | 2 | 4 | 0.1575501  | 0.18734596 | 2 | 4 | 0.1575501  | 0.18734596  |
| chrX | 102051788 | 102097944 | 46157  | 2  | 2 | 4 | 0.1575501  | 0.06713722 | 2 | 6 | 0.1575501  | 0.44141547  |
| chrX | 102097944 | 102193502 | 95559  | 1  | 2 | 4 | 0.30102999 | 0.06713722 | 1 | 6 | 0.05404976 | 0.44141547  |
| chrX | 102193502 | 102564983 | 371482 | 8  | 2 | 4 | 0.30102999 | 0.11390336 | 1 | 5 | 0.05404976 | 0.30102999  |
| chrX | 102564983 | 102565042 | 60     | 1  | 2 | 4 | 0.30102999 | 0.03812622 | 1 | 7 | 0.05404976 | 0.60763643  |
| chrX | 102565042 | 102632344 | 67303  | 2  | 2 | 4 | 0.30102999 | 0.06713722 | 2 | 6 | 0.05404976 | 0.44141547  |
| chrX | 102632344 | 102632399 | 56     | 1  | 2 | 4 | 0.30102999 | 0.03812622 | 1 | 7 | 0.05404976 | 0.60763643  |
| chrX | 102632399 | 102754792 | 122394 | 2  | 2 | 4 | 0.30102999 | 0.06713722 | 2 | 6 | 0.05404976 | 0.44141547  |
| chrX | 102754792 | 102789383 | 34592  | 1  | 2 | 4 | 0.30102999 | 0.11390336 | 1 | 5 | 0.05404976 | 0.30102999  |
| chrX | 102789383 | 103031756 | 242374 | 7  | 2 | 4 | 0.30102999 | 0.18734596 | 1 | 4 | 0.05404976 | 0.18734596  |
| chrX | 103031756 | 103094064 | 62309  | 4  | 2 | 4 | 0.30102999 | 0.11390336 | 1 | 5 | 0.05404976 | 0.30102999  |
| chrX | 103094064 | 103269136 | 175073 | 6  | 2 | 4 | 0.30102999 | 0.18734596 | 1 | 4 | 0.05404976 | 0.18734596  |
| chrX | 103269136 | 103288063 | 18928  | 2  | 2 | 5 | 0.30102999 | 0.12309572 | 1 | 6 | 0.05404976 | 0.30102999  |
| chrX | 103288063 | 103376653 | 88793  | 1  | 2 | 5 | 0.30102999 | 0.13510895 | 1 | 5 | 0.05404976 | 0.13510895  |
| chrX | 103376653 | 10365457  | 318603 | 5  | 2 | 6 | 0.30102999 | 0.30102999 | 1 | 5 | 0.05404976 | 0.12309572  |
| chrX | 10365457  | 103695516 | 60     | 1  | 2 | 6 | 0.30102999 | 0.112913   | 1 | 7 | 0.05404976 | 0.30102999  |
| chrX | 103695516 | 103808579 | 113064 | 1  | 2 | 6 | 0.30102999 | 0.20064824 | 1 | 6 | 0.05404976 | 0.20064824  |
| chrX | 103808579 | 103867053 | 58475  | 2  | 2 | 7 | 0.30102999 | 0.20469099 | 1 | 7 | 0.05404976 | 0.20469099  |
| chrX | 103867053 | 103908468 | 41416  | 2  | 2 | 7 | 0.30102999 | 0.13499366 | 1 | 8 | 0.05404976 | 0.30102999  |
| chrX | 103908468 | 104029333 | 120866 | 2  | 2 | 7 | 0.30102999 | 0.20469099 | 1 | 7 | 0.05404976 | 0.20469099  |
| chrX | 104029333 | 104097706 | 68374  | 2  | 2 | 6 | 0.30102999 | 0.129913   | 1 | 7 | 0.05404976 | 0.30102999  |
| chrX | 104097706 | 104097765 | 60     | 1  | 2 | 6 | 0.30102999 | 0.08122616 | 1 | 8 | 0.05404976 | 0.4250187   |
| chrX | 104097765 | 104172198 | 74434  | 1  | 1 | 6 | 0.1218695  | 0.129913   | 1 | 7 | 0.1218695  | 0.30102999  |
| chrX | 104172198 | 104172257 | 60     | 1  | 1 | 7 | 0.1218695  | 0.13499366 | 1 | 8 | 0.1218695  | 0.30102999  |
| chrX | 104172257 | 104208785 | 36529  | 1  | 1 | 6 | 0.1218695  | 0.20064824 | 1 | 6 | 0.1218695  | 0.20064824  |
| chrX | 104208785 | 104291149 | 82365  | 2  | 1 | 6 | 0.1218695  | 0.30102999 | 1 | 5 | 0.1218695  | 0.12309572  |
| chrX | 104291149 | 104291208 | 60     | 1  | 1 | 6 | 0.1218695  | 0.08122616 | 1 | 8 | 0.1218695  | 0.4250187   |
| chrX | 104291208 | 104375419 | 84212  | 1  | 1 | 6 | 0.1218695  | 0.129913   | 1 | 7 | 0.1218695  | 0.30102999  |
| chrX | 104375419 | 104463596 | 88178  | 2  | 1 | 6 | 0.1218695  | 0.30102999 | 1 | 5 | 0.1218695  | 0.12309572  |
| chrX | 104463596 | 104463972 | 377    | 2  | 1 | 8 | 0.1218695  | 0.13872638 | 1 | 9 | 0.1218695  | 0.30102999  |
| chrX | 104463972 | 104512161 | 48190  | 1  | 1 | 7 | 0.1218695  | 0.30102999 | 1 | 6 | 0.1218695  | 0.129913    |
| chrX | 104512161 | 104643689 | 131529 | 3  | 1 | 6 | 0.1218695  | 0.20064824 | 1 | 6 | 0.1218695  | 0.20064824  |
| chrX | 104643689 | 104643748 | 60     | 1  | 1 | 9 | 0.1218695  | 0.42015402 | 1 | 7 | 0.1218695  | 0.08584816  |
| chrX | 104643748 | 104727876 | 84129  | 2  | 1 | 7 | 0.1218695  | 0.30102999 | 1 | 6 | 0.1218695  | 0.129913    |
| chrX | 104727876 | 104760646 | 32771  | 2  | 1 | 7 | 0.1218695  | 0.20469099 | 1 | 7 | 0.1218695  | 0.20469099  |
| chrX | 104760646 | 104811651 | 51006  | 1  | 1 | 6 | 0.1218695  | 0.20064824 | 1 | 6 | 0.1218695  | 0.20064824  |
| chrX | 104811651 | 104843111 | 31461  | 1  | 1 | 6 | 0.1218695  | 0.129913   | 1 | 7 | 0.1218695  | 0.30102999  |
| chrX | 104843111 | 105077051 | 233941 | 4  | 1 | 6 | 0.1218695  | 0.20064824 | 1 | 6 | 0.1218695  | 0.20064824  |
| chrX | 105077051 | 105135229 | 58179  | 2  | 1 | 7 | 0.05404976 | 0.30102999 | 2 | 6 | 0.30102999 | 0.129913    |
| chrX | 105135229 | 105167104 | 31876  | 2  | 1 | 7 | 0.05404976 | 0.20469099 | 2 | 7 | 0.30102999 | 0.20469099  |
| chrX | 105167104 | 105167162 | 59     | 1  | 1 | 8 | 0.05404976 | 0.30102999 | 2 | 7 | 0.30102999 | 0.13499366  |
| chrX | 105167162 | 105277223 | 110062 | 2  | 1 | 7 | 0.05404976 | 0.30102999 | 2 | 6 | 0.30102999 | 0.129913    |
| chrX | 105277223 | 105279274 | 2052   | 2  | 1 | 7 | 0.05404976 | 0.20469099 | 2 | 7 | 0.30102999 | 0.20469099  |
| chrX | 105279274 | 105401671 | 122398 | 2  | 1 | 6 | 0.05404976 | 0.20064824 | 2 | 6 | 0.30102999 | 0.20064824  |
| chrX | 105401671 | 105446021 | 44351  | 2  | 1 | 6 | 0.05404976 | 0.129913   | 2 | 7 | 0.30102999 | 0.30102999  |
| chrX | 105446021 | 105452212 | 6192   | 2  | 2 | 6 | 0.1575501  | 0.129913   | 2 | 7 | 0.1575501  | 0.30102999  |
| chrX | 105452212 | 105674198 | 221987 | 3  | 1 | 6 | 0.05404976 | 0.20064824 | 2 | 6 | 0.30102999 | 0.20064824  |
| chrX | 105674198 | 105783180 | 108983 | 1  | 1 | 6 | 0.05404976 | 0.129913   | 2 | 7 | 0.30102999 | 0.30102999  |
| chrX | 105783180 | 105876203 | 93024  | 2  | 1 | 5 | 0.05404976 | 0.07511598 | 2 | 6 | 0.30102999 | 0.43181735  |
| chrX | 105876203 | 105922448 | 46246  | 2  | 1 | 3 | 0.05404976 | 0.03070643 | 2 | 6 | 0.30102999 | 0.63695542  |
| chrX | 105922448 | 105922507 | 60     | 1  | 1 | 4 | 0.05404976 | 0.06713722 | 2 | 6 | 0.30102999 | 0.44141547  |
| chrX | 105922507 | 106028458 | 109552 | 1  | 1 | 3 | 0.05404976 | 0.03070643 | 2 | 6 | 0.30102999 | 0.63695542  |
| chrX | 106028458 | 106109219 | 80762  | 1  | 1 | 3 | 0.05404976 | 0.05670724 | 2 | 5 | 0.30102999 | 0.45545077  |
| chrX | 106109219 | 106141055 | 31837  | 2  | 1 | 4 | 0.05404976 | 0.11390336 | 2 | 5 | 0.30102999 | 0.30102999  |
| chrX | 106141055 | 106397440 | 256386 | 9  | 1 | 4 | 0.05404976 | 0.06713722 | 2 | 6 | 0.30102999 | 0.44141547  |
| chrX | 106397440 | 106397499 | 60     | 1  | 1 | 4 | 0.05404976 | 0.03812622 | 2 | 7 | 0.30102999 | 0.60763643  |
| chrX | 106397499 | 106517691 | 120193 | 4  | 1 | 3 | 0.05404976 | 0.03070643 | 2 | 6 | 0.30102999 | 0.63695542  |
| chrX | 106517691 | 106629001 | 111311 | 2  | 1 | 2 | 0.05404976 | 0.01053319 | 2 | 6 | 0.30102999 | 0.91219088  |
| chrX | 106629001 | 106677622 | 48622  | 2  | 1 | 2 | 0.05404976 | 0.00493743 | 2 | 7 | 0.30102999 | 0.115881773 |
| chrX | 106677622 | 106844305 | 156684 | 4  | 1 | 3 | 0.05404976 | 0.01588358 | 2 | 7 | 0.30102999 | 0.84395715  |
| chrX | 106844305 | 106957968 | 113664 | 1  | 1 | 3 | 0.05404976 | 0.05670724 | 2 | 5 | 0.30102999 | 0.45545077  |
| chrX | 106957968 | 107040034 | 82067  | 5  | 1 | 3 | 0.05404976 | 0.03070643 | 2 | 6 | 0.30102999 | 0.63695542  |
| chrX | 107040034 | 107097663 | 57630  | 2  | 1 | 4 | 0.05404976 | 0.06713722 | 2 | 6 | 0.30102999 | 0.44141547  |
| chrX | 107097663 | 107175137 | 77475  | 2  | 1 | 2 | 0.05404976 | 0.01053319 | 2 | 6 | 0.30102999 | 0.91219088  |
| chrX | 107175137 | 107217219 | 42083  | 2  | 1 | 2 | 0.05404976 | 0.02162467 | 2 | 5 | 0.30102999 | 0.68214471  |
| chrX | 107217219 | 107217278 | 60     | 1  | 1 | 3 | 0.05404976 | 0.05670724 | 2 | 5 | 0.30102999 | 0.45545077  |
| chrX | 107217278 | 107301387 | 84110  | 2  | 1 | 3 | 0.05404976 | 0.17593012 | 3 | 3 | 0.30102999 | 0.17593012  |
| chrX | 107301387 | 107301438 | 52     | 1  | 1 | 3 | 0.05404976 | 0.05670724 | 2 | 5 | 0.30102999 | 0.45545077  |
| chrX | 107301438 | 107912277 | 610840 | 14 | 1 | 3 | 0.05404976 | 0.10122019 | 2 | 4 | 0.30102999 | 0.30102999  |
| chrX | 107912277 | 107967478 | 55202  | 2  | 1 | 3 | 0.05404976 | 0.05670724 | 2 | 5 | 0.30102999 | 0.45545077  |
| chrX | 107967478 | 108073392 | 105915 | 2  | 1 | 3 | 0.05404976 | 0.03070643 | 2 | 6 | 0.30102999 | 0.63695542  |
| chrX | 108073392 | 108073451 | 60     | 1  | 1 | 3 | 0.05404976 | 0.01598258 | 2 | 7 | 0.30102999 | 0.84395715  |
| chrX | 108073451 | 108163861 | 90411  | 1  | 1 | 3 | 0.05404976 | 0.03070643 | 2 | 6 | 0.30102999 | 0.63695542  |
| chrX | 108163861 | 108163920 | 60     | 1  | 1 | 4 | 0.05404976 | 0.06713722 | 2 | 6 | 0.30102999 | 0.44141547  |
| chrX | 108163920 | 108281482 | 117563 | 1  | 1 | 4 | 0.05404976 | 0.11390336 | 2 | 5 | 0.30102999 | 0.30102999  |
| chrX | 108281482 | 108434572 | 153091 | 2  | 1 | 4 | 0.05404976 | 0.06713722 | 2 | 6 | 0.30102999 | 0.44141547  |
| chrX | 108434572 | 108638550 | 203979 | 2  | 1 | 3 | 0.05404976 | 0.03070643 | 2 | 6 | 0.30102999 | 0.63695542  |
| chrX | 108638550 | 108638609 | 60     | 1  | 1 | 3 | 0.02438896 | 0.03070643 | 3 | 6 | 0.51676182 | 0.63695542  |
| chrX | 108638609 | 108673525 | 34917  | 1  | 1 | 3 | 0.05404976 | 0.03070643 | 2 | 6 | 0.30102999 | 0.63695542  |
| chrX | 108673525 | 108673582 | 58     | 1  | 1 | 4 | 0.05404976 | 0.06713722 | 2 | 6 | 0.30102999 | 0.44141547  |
| chrX | 108673582 | 108708556 | 34975  | 1  | 1 | 3 | 0.05404976 | 0.03070643 | 2 | 6 | 0.30102999 | 0.63695542  |
| chrX | 108708556 | 108786264 | 77709  | 3  | 1 | 3 | 0.02438896 | 0.03070643 | 3 | 6 | 0.51676182 | 0.63695542  |
| chrX | 108786264 | 108786323 | 60     | 1  | 1 | 4 | 0.01091641 | 0.06713722 | 4 | 6 | 0.76005302 | 0.441       |

|      |           |           |        |    |   |   |            |            |   |   |            |            |
|------|-----------|-----------|--------|----|---|---|------------|------------|---|---|------------|------------|
| chrX | 111078271 | 11137129  | 58859  | 2  | 2 | 4 | 0.0828918  | 0.03812622 | 3 | 7 | 0.30102999 | 0.60763643 |
| chrX | 111137129 | 111171326 | 34198  | 2  | 2 | 6 | 0.0828918  | 0.08122616 | 3 | 8 | 0.30102999 | 0.4250187  |
| chrX | 111171326 | 111280335 | 109010 | 3  | 2 | 4 | 0.0828918  | 0.03812622 | 3 | 7 | 0.30102999 | 0.60763643 |
| chrX | 111280335 | 111363911 | 83577  | 2  | 2 | 4 | 0.0828918  | 0.06713722 | 3 | 6 | 0.30102999 | 0.44141547 |
| chrX | 111363911 | 111441297 | 77387  | 2  | 2 | 3 | 0.0828918  | 0.03070643 | 3 | 6 | 0.30102999 | 0.63695542 |
| chrX | 111441297 | 111441356 | 60     | 1  | 2 | 4 | 0.0828918  | 0.03812622 | 3 | 7 | 0.30102999 | 0.60763643 |
| chrX | 111441356 | 111512985 | 71630  | 2  | 2 | 3 | 0.0828918  | 0.03070643 | 3 | 6 | 0.30102999 | 0.63695542 |
| chrX | 111512985 | 111536112 | 23128  | 2  | 2 | 4 | 0.0828918  | 0.06713722 | 3 | 6 | 0.30102999 | 0.44141547 |
| chrX | 111536112 | 111608916 | 72805  | 2  | 2 | 4 | 0.0828918  | 0.03812622 | 3 | 7 | 0.30102999 | 0.60763643 |
| chrX | 111608916 | 111700989 | 92074  | 2  | 1 | 4 | 0.02438996 | 0.03812622 | 3 | 7 | 0.51676182 | 0.60763643 |
| chrX | 111700989 | 111888891 | 187903 | 2  | 1 | 3 | 0.02438996 | 0.01598258 | 3 | 7 | 0.51676182 | 0.84395715 |
| chrX | 111888891 | 111920761 | 31871  | 2  | 2 | 3 | 0.0828918  | 0.01598258 | 3 | 7 | 0.30102999 | 0.84395715 |
| chrX | 111920761 | 112081992 | 161232 | 3  | 1 | 3 | 0.02438996 | 0.01598258 | 3 | 7 | 0.51676182 | 0.84395715 |
| chrX | 112081992 | 112122683 | 40692  | 1  | 1 | 3 | 0.02438996 | 0.03070643 | 3 | 6 | 0.51676182 | 0.63695542 |
| chrX | 112122683 | 112317309 | 194627 | 1  | 1 | 2 | 0.05404976 | 0.01053319 | 2 | 6 | 0.30102999 | 0.91219088 |
| chrX | 112317309 | 112317368 | 60     | 1  | 2 | 2 | 0.0828918  | 0.01053319 | 3 | 6 | 0.30102999 | 0.91219088 |
| chrX | 112317368 | 112365567 | 48200  | 1  | 2 | 1 | 0.0828918  | 0.00204627 | 3 | 6 | 0.30102999 | 1.31360226 |
| chrX | 112365567 | 112510043 | 144477 | 2  | 1 | 1 | 0.02438996 | 0.00204627 | 3 | 6 | 0.51676182 | 1.31360226 |
| chrX | 112510043 | 112510102 | 60     | 1  | 1 | 3 | 0.02438996 | 0.03070643 | 3 | 6 | 0.51676182 | 0.63695542 |
| chrX | 112510102 | 112572176 | 62075  | 1  | 1 | 1 | 0.02438996 | 0.03070643 | 3 | 4 | 0.51676182 | 0.76005302 |
| chrX | 112572176 | 112637368 | 65193  | 1  | 1 | 1 | 0.05404976 | 0.01091641 | 2 | 4 | 0.30102999 | 0.76005302 |
| chrX | 112637368 | 112637427 | 60     | 1  | 1 | 1 | 0.05404976 | 0.00478973 | 2 | 5 | 0.30102999 | 1.02643191 |
| chrX | 112637427 | 112776336 | 138910 | 1  | 1 | 1 | 0.05404976 | 0.01091641 | 2 | 4 | 0.30102999 | 0.76005302 |
| chrX | 112776336 | 112776395 | 60     | 1  | 1 | 1 | 0.02438996 | 0.01091641 | 2 | 4 | 0.51676182 | 0.76005302 |
| chrX | 112776395 | 113032051 | 25567  | 2  | 1 | 1 | 0.05404976 | 0.01091641 | 2 | 4 | 0.30102999 | 0.76005302 |
| chrX | 113032051 | 113118739 | 86689  | 2  | 1 | 2 | 0.02438996 | 0.0429175  | 3 | 4 | 0.51676182 | 0.47744371 |
| chrX | 113118739 | 113118798 | 60     | 1  | 1 | 2 | 0.02438996 | 0.01053319 | 3 | 6 | 0.51676182 | 0.91219088 |
| chrX | 113118798 | 113275135 | 156338 | 2  | 0 | 2 | 0          | 0.02162467 | 3 | 5 | 0.93173516 | 0.68214471 |
| chrX | 113275135 | 113464525 | 189391 | 2  | 1 | 2 | 0          | 0.01053319 | 3 | 6 | 0.93173516 | 0.91219088 |
| chrX | 113464525 | 113818779 | 354255 | 5  | 0 | 3 | 0          | 0.01598258 | 3 | 7 | 0.93173516 | 0.84395715 |
| chrX | 113818779 | 113818834 | 56     | 1  | 1 | 3 | 0.02438996 | 0.01598258 | 3 | 7 | 0.51676182 | 0.84395715 |
| chrX | 113818834 | 113934302 | 115469 | 4  | 1 | 2 | 0.02438996 | 0.01053319 | 3 | 6 | 0.51676182 | 0.91219088 |
| chrX | 113934302 | 113934361 | 60     | 1  | 2 | 2 | 0.0828918  | 0.01053319 | 3 | 6 | 0.30102999 | 0.91219088 |
| chrX | 113934361 | 114107990 | 173630 | 8  | 1 | 2 | 0.02438996 | 0.01053319 | 3 | 6 | 0.51676182 | 0.91219088 |
| chrX | 114107990 | 114108049 | 60     | 1  | 1 | 2 | 0.02438996 | 0.00493743 | 3 | 7 | 0.51676182 | 1.16581773 |
| chrX | 114108049 | 114242518 | 134470 | 2  | 1 | 2 | 0.02438996 | 0.01053319 | 3 | 6 | 0.51676182 | 0.91219088 |
| chrX | 114242518 | 114251886 | 9369   | 2  | 1 | 3 | 0.02438996 | 0.01598258 | 3 | 7 | 0.51676182 | 0.84395715 |
| chrX | 114251886 | 114305441 | 53556  | 1  | 1 | 3 | 0.02438996 | 0.03070643 | 3 | 6 | 0.51676182 | 0.63695542 |
| chrX | 114305441 | 114305500 | 60     | 1  | 1 | 4 | 0.02438996 | 0.06713722 | 3 | 6 | 0.51676182 | 0.44141547 |
| chrX | 114305500 | 114423468 | 117969 | 4  | 1 | 3 | 0.02438996 | 0.03070643 | 3 | 6 | 0.51676182 | 0.63695542 |
| chrX | 114423468 | 114622584 | 199117 | 4  | 1 | 3 | 0.02438996 | 0.05670724 | 3 | 5 | 0.51676182 | 0.45545077 |
| chrX | 114622584 | 114622643 | 60     | 1  | 1 | 3 | 0.02438996 | 0.0079614  | 3 | 8 | 0.51676182 | 1.07548421 |
| chrX | 114622643 | 114717179 | 94537  | 1  | 1 | 3 | 0.02438996 | 0.03070643 | 3 | 6 | 0.51676182 | 0.63695542 |
| chrX | 114717179 | 114821025 | 103847 | 1  | 1 | 3 | 0.02438996 | 0.05670724 | 3 | 5 | 0.51676182 | 0.45545077 |
| chrX | 114821025 | 114871243 | 50219  | 3  | 1 | 4 | 0.02438996 | 0.11390336 | 3 | 5 | 0.51676182 | 0.30102999 |
| chrX | 114871243 | 114890369 | 19127  | 1  | 1 | 5 | 0.02438996 | 0.19510895 | 3 | 5 | 0.51676182 | 0.19510895 |
| chrX | 114890369 | 114890428 | 60     | 1  | 1 | 5 | 0.02438996 | 0.07511598 | 3 | 7 | 0.51676182 | 0.43181735 |
| chrX | 114890428 | 114941617 | 51190  | 1  | 1 | 5 | 0.02438996 | 0.12309572 | 3 | 6 | 0.51676182 | 0.30102999 |
| chrX | 114941617 | 115007309 | 65693  | 2  | 1 | 5 | 0.02438996 | 0.07511598 | 3 | 7 | 0.51676182 | 0.43181735 |
| chrX | 115007309 | 115098133 | 90825  | 1  | 1 | 4 | 0.02438996 | 0.06713722 | 3 | 6 | 0.51676182 | 0.44141547 |
| chrX | 115098133 | 115176598 | 78466  | 1  | 1 | 3 | 0.02438996 | 0.03070643 | 3 | 6 | 0.51676182 | 0.63695542 |
| chrX | 115176598 | 115217658 | 41061  | 2  | 1 | 4 | 0.02438996 | 0.03812622 | 3 | 7 | 0.51676182 | 0.60763643 |
| chrX | 115217658 | 115454837 | 237180 | 4  | 1 | 3 | 0.02438996 | 0.05670724 | 3 | 5 | 0.51676182 | 0.45545077 |
| chrX | 115454837 | 115454896 | 60     | 1  | 1 | 5 | 0.02438996 | 0.19510895 | 3 | 5 | 0.51676182 | 0.19510895 |
| chrX | 115454896 | 115588823 | 133928 | 2  | 1 | 3 | 0.02438996 | 0.05670724 | 3 | 5 | 0.51676182 | 0.45545077 |
| chrX | 115588823 | 116121454 | 532632 | 7  | 1 | 2 | 0.05404976 | 0.02162467 | 3 | 5 | 0.30102999 | 0.68214471 |
| chrX | 116121454 | 116368756 | 247303 | 3  | 1 | 2 | 0.05404976 | 0.01053319 | 2 | 6 | 0.30102999 | 0.91219088 |
| chrX | 116368756 | 116758383 | 389628 | 3  | 1 | 2 | 0.05404976 | 0.02162467 | 2 | 5 | 0.30102999 | 0.68214471 |
| chrX | 116758383 | 116870378 | 111996 | 2  | 1 | 3 | 0.05404976 | 0.03070643 | 3 | 6 | 0.30102999 | 0.63695542 |
| chrX | 116870378 | 117032652 | 162275 | 2  | 1 | 3 | 0.05404976 | 0.10122019 | 4 | 6 | 0.30102999 | 0.30102999 |
| chrX | 117032652 | 117130599 | 97948  | 3  | 1 | 3 | 0.05404976 | 0.05670724 | 2 | 5 | 0.30102999 | 0.45545077 |
| chrX | 117130599 | 117331310 | 200712 | 5  | 1 | 3 | 0.05404976 | 0.03070643 | 2 | 6 | 0.30102999 | 0.63695542 |
| chrX | 117331310 | 117582917 | 251608 | 6  | 2 | 3 | 0.1575501  | 0.03070643 | 2 | 6 | 0.1575501  | 0.63695542 |
| chrX | 117582917 | 117738738 | 155822 | 5  | 2 | 3 | 0.1575501  | 0.05670724 | 2 | 5 | 0.1575501  | 0.45545077 |
| chrX | 117738738 | 117995787 | 237050 | 8  | 2 | 3 | 0.1575501  | 0.01598258 | 2 | 7 | 0.1575501  | 0.84395715 |
| chrX | 117995787 | 118053390 | 57604  | 2  | 1 | 4 | 0.1575501  | 0.03812622 | 2 | 7 | 0.1575501  | 0.60763643 |
| chrX | 118053390 | 118246763 | 373374 | 13 | 2 | 4 | 0.1575501  | 0.0157501  | 2 | 4 | 0.1575501  | 0.79906872 |
| chrX | 118246763 | 118493482 | 66720  | 1  | 2 | 3 | 0.1575501  | 0.0079614  | 2 | 8 | 0.1575501  | 1.07548421 |
| chrX | 118493482 | 118752165 | 258684 | 11 | 2 | 3 | 0.1575501  | 0.01598258 | 2 | 7 | 0.1575501  | 0.84395715 |
| chrX | 118752165 | 118841277 | 89113  | 4  | 2 | 3 | 0.1575501  | 0.0079614  | 2 | 8 | 0.1575501  | 1.07548421 |
| chrX | 118841277 | 118921399 | 80123  | 2  | 1 | 2 | 0.1575501  | 0.00493743 | 2 | 7 | 0.1575501  | 1.16581773 |
| chrX | 118921399 | 119082441 | 161043 | 7  | 1 | 2 | 0.05404976 | 0.00493743 | 2 | 7 | 0.30102999 | 1.16581773 |
| chrX | 119082441 | 119165877 | 83437  | 1  | 1 | 2 | 0.05404976 | 0.01053319 | 2 | 6 | 0.30102999 | 0.91219088 |
| chrX | 119165877 | 119243000 | 77124  | 2  | 1 | 2 | 0.05404976 | 0.03070643 | 2 | 6 | 0.30102999 | 0.63695542 |
| chrX | 119243000 | 119249206 | 6207   | 2  | 1 | 3 | 0.05404976 | 0.01598258 | 2 | 7 | 0.30102999 | 0.84395715 |
| chrX | 119249206 | 119337430 | 88225  | 1  | 1 | 2 | 0.05404976 | 0.00493743 | 2 | 7 | 0.30102999 | 1.16581773 |
| chrX | 119337430 | 119389047 | 51618  | 3  | 1 | 2 | 0.05404976 | 0.01053319 | 2 | 6 | 0.30102999 | 0.91219088 |
| chrX | 119389047 | 119451599 | 62553  | 5  | 1 | 2 | 0.05404976 | 0.00493743 | 2 | 7 | 0.30102999 | 1.16581773 |
| chrX | 119451599 | 119496297 | 44699  | 2  | 1 | 2 | 0.05404976 | 0.01053319 | 2 | 6 | 0.30102999 | 0.91219088 |
| chrX | 119496297 | 119526273 | 29977  | 2  | 1 | 3 | 0.05404976 | 0.03070643 | 2 | 6 | 0.30102999 | 0.63695542 |
| chrX | 119526273 | 119623196 | 96924  | 2  | 1 | 2 | 0.05404976 | 0.01053319 | 2 | 6 | 0.30102999 | 0.91219088 |
| chrX | 119623196 | 119672639 | 49444  | 3  | 1 | 3 | 0.05404976 | 0.03070643 | 2 | 6 | 0.30102999 | 0.63695542 |
| chrX | 119672639 | 119739970 | 67332  | 1  | 1 | 2 | 0.05404976 | 0.01053319 | 2 | 6 | 0.30102999 | 0.91219088 |
| chrX | 119739970 | 119761258 | 21289  | 1  | 1 | 1 | 0.05404976 | 0.00204627 | 3 | 6 | 0.30102999 | 1.31360226 |
| chrX | 119761258 | 119842618 | 81361  | 2  | 1 | 1 | 0.05404976 | 0.00478973 | 2 | 5 | 0.30102999 | 1.02643191 |
| chrX | 119842618 | 119931682 | 89065  | 2  | 1 | 2 | 0.05404976 | 0.01053319 | 2 | 6 | 0.30102999 | 0.91219088 |
| chrX | 119931682 | 119931741 | 60     | 1  | 1 | 3 | 0.05404976 | 0.03070643 | 2 | 6 | 0.30102999 | 0.63695542 |
| chrX | 119931741 | 120001567 | 69827  | 1  | 1 | 2 | 0.05404976 | 0.01053319 | 2 | 6 | 0.30102999 | 0.91219088 |
| chrX | 120001567 | 120001626 | 60     | 1  | 1 | 3 | 0.05404976 | 0.03070643 | 2 | 6 |            |            |

|      |           |           |        |   |   |   |            |            |   |   |            |            |
|------|-----------|-----------|--------|---|---|---|------------|------------|---|---|------------|------------|
| chrX | 123412470 | 123412529 | 60     | 1 | 2 | 3 | 0.08289318 | 0.01598258 | 3 | 7 | 0.30102999 | 0.84395715 |
| chrX | 123412529 | 123443453 | 30925  | 1 | 2 | 3 | 0.08289318 | 0.03070643 | 3 | 6 | 0.30102999 | 0.63695542 |
| chrX | 123443453 | 123480305 | 36853  | 1 | 1 | 3 | 0.02438896 | 0.03070643 | 3 | 6 | 0.51676182 | 0.63695542 |
| chrX | 123480305 | 123480361 | 57     | 1 | 1 | 4 | 0.02438896 | 0.06713722 | 3 | 6 | 0.51676182 | 0.44141547 |
| chrX | 123480361 | 123499637 | 19277  | 1 | 1 | 3 | 0.02438896 | 0.03070643 | 3 | 6 | 0.51676182 | 0.63695542 |
| chrX | 123499637 | 123546502 | 46866  | 3 | 2 | 3 | 0.08289318 | 0.03070643 | 3 | 6 | 0.30102999 | 0.63695542 |
| chrX | 123546502 | 123546561 | 60     | 1 | 3 | 3 | 0.08289318 | 0.01598258 | 3 | 7 | 0.30102999 | 0.84395715 |
| chrX | 123546561 | 123598237 | 51677  | 1 | 2 | 3 | 0.1575501  | 0.01598258 | 2 | 7 | 0.1575501  | 0.84395715 |
| chrX | 123598237 | 123630864 | 32628  | 1 | 0 | 3 | 0          | 0.01598258 | 2 | 7 | 0.61140001 | 0.84395715 |
| chrX | 123630864 | 123671491 | 40628  | 2 | 0 | 4 | 0          | 0.03812622 | 2 | 7 | 0.61140001 | 0.60763643 |
| chrX | 123671491 | 124028218 | 356728 | 8 | 0 | 4 | 0          | 0.06713722 | 2 | 6 | 0.61140001 | 0.44141547 |
| chrX | 124028218 | 124059235 | 31018  | 1 | 0 | 4 | 0          | 0.11390336 | 2 | 5 | 0.61140001 | 0.30102999 |
| chrX | 124059235 | 124097622 | 38388  | 1 | 0 | 4 | 0          | 0.18734596 | 2 | 4 | 0.61140001 | 0.18734596 |
| chrX | 124097622 | 124169775 | 72154  | 2 | 0 | 4 | 0          | 0.11390336 | 2 | 5 | 0.61140001 | 0.30102999 |
| chrX | 124169775 | 124169834 | 60     | 1 | 0 | 4 | 0          | 0.03812622 | 2 | 7 | 0.61140001 | 0.60763643 |
| chrX | 124169834 | 124315724 | 145891 | 1 | 0 | 3 | 0          | 0.01598258 | 2 | 7 | 0.61140001 | 0.84395715 |
| chrX | 124315724 | 124315783 | 60     | 1 | 1 | 3 | 0.05404976 | 0.01598258 | 2 | 7 | 0.30102999 | 0.84395715 |
| chrX | 124315783 | 124439389 | 123607 | 1 | 1 | 3 | 0.05404976 | 0.03070643 | 2 | 6 | 0.30102999 | 0.63695542 |
| chrX | 124439389 | 124472478 | 33090  | 1 | 1 | 2 | 0.05404976 | 0.0105319  | 2 | 6 | 0.30102999 | 0.91219088 |
| chrX | 124472478 | 124584316 | 121839 | 1 | 1 | 2 | 0.05404976 | 0.02162467 | 2 | 5 | 0.30102999 | 0.68214471 |
| chrX | 124584316 | 124935566 | 341251 | 2 | 0 | 1 | 0          | 0.02438896 | 1 | 3 | 0.30102999 | 0.51676182 |
| chrX | 124935566 | 125191679 | 256114 | 2 | 0 | 1 | 0          | 0.05404976 | 0 | 2 | 0.30102999 | 0.30102999 |
| chrX | 125191679 | 125293001 | 101323 | 2 | 0 | 1 | 0          | 0.02438896 | 2 | 1 | 0.30102999 | 0.51676182 |
| chrX | 125293001 | 125683723 | 390723 | 3 | 0 | 1 | 0          | 0.05404976 | 1 | 1 | 0.30102999 | 0.30102999 |
| chrX | 125683723 | 126117880 | 434158 | 7 | 0 | 1 | 0          | 0.02438896 | 1 | 3 | 0.30102999 | 0.51676182 |
| chrX | 126117880 | 126117939 | 60     | 1 | 1 | 1 | 0          | 0.01091641 | 1 | 4 | 0.30102999 | 0.76005302 |
| chrX | 126117939 | 126305440 | 187502 | 1 | 0 | 1 | 0          | 0.01091641 | 0 | 4 | 0          | 0.76005302 |
| chrX | 126305440 | 127247041 | 941602 | 9 | 0 | 1 | 0          | 0.02438896 | 0 | 3 | 0          | 0.51676182 |
| chrX | 127247041 | 127358373 | 111333 | 1 | 0 | 1 | 0          | 0.05404976 | 0 | 2 | 0          | 0.30102999 |
| chrX | 127358373 | 127561996 | 203624 | 3 | 0 | 1 | 0          | 0.05404976 | 1 | 2 | 0.30102999 | 0.30102999 |
| chrX | 127561996 | 127562055 | 60     | 1 | 1 | 1 | 0.05404976 | 0.02438896 | 2 | 3 | 0.30102999 | 0.51676182 |
| chrX | 127562055 | 127799877 | 237823 | 2 | 1 | 1 | 0.05404976 | 0.05404976 | 2 | 2 | 0.30102999 | 0.30102999 |
| chrX | 127799877 | 127943177 | 143301 | 3 | 1 | 1 | 0.05404976 | 0.02438896 | 3 | 3 | 0.30102999 | 0.51676182 |
| chrX | 127943177 | 127943236 | 60     | 1 | 2 | 1 | 0.1575501  | 0.01091641 | 2 | 4 | 0.1575501  | 0.76005302 |
| chrX | 127943236 | 128170249 | 227014 | 2 | 2 | 1 | 0.30102999 | 0.01091641 | 4 | 4 | 0.05404976 | 0.76005302 |
| chrX | 128170249 | 128170308 | 60     | 1 | 2 | 2 | 0.1575501  | 0.02162467 | 5 | 2 | 0.1575501  | 0.68214471 |
| chrX | 128170308 | 128294886 | 124579 | 1 | 2 | 2 | 0.1575501  | 0.0429175  | 2 | 4 | 0.1575501  | 0.47744371 |
| chrX | 128294886 | 128783483 | 488598 | 9 | 2 | 2 | 0.1575501  | 0.02162467 | 2 | 5 | 0.1575501  | 0.68214471 |
| chrX | 128783483 | 128877869 | 94387  | 2 | 2 | 3 | 0.1575501  | 0.05670724 | 2 | 5 | 0.1575501  | 0.45545077 |
| chrX | 128877869 | 128877928 | 60     | 1 | 3 | 3 | 0.30102999 | 0.05670724 | 2 | 5 | 0.08289318 | 0.45545077 |
| chrX | 128877928 | 128939593 | 61666  | 2 | 3 | 3 | 0.30102999 | 0.10122019 | 2 | 4 | 0.08289318 | 0.30102999 |
| chrX | 128939593 | 128939652 | 60     | 1 | 4 | 3 | 0.47744371 | 0.03070643 | 6 | 2 | 0.0429175  | 0.63695542 |
| chrX | 128939652 | 128978313 | 38662  | 2 | 3 | 3 | 0.30102999 | 0.05670724 | 5 | 5 | 0.08289318 | 0.45545077 |
| chrX | 128978313 | 129045725 | 67413  | 2 | 3 | 3 | 0.30102999 | 0.03070643 | 2 | 6 | 0.08289318 | 0.63695542 |
| chrX | 129045725 | 129252532 | 206808 | 7 | 2 | 3 | 0.1575501  | 0.03070643 | 6 | 6 | 0.1575501  | 0.63695542 |
| chrX | 129252532 | 129429699 | 177168 | 6 | 3 | 3 | 0.30102999 | 0.03070643 | 6 | 6 | 0.08289318 | 0.63695542 |
| chrX | 129429699 | 129429758 | 60     | 1 | 4 | 3 | 0.47744371 | 0.01598258 | 2 | 7 | 0.0429175  | 0.84395715 |
| chrX | 129429758 | 129538952 | 109195 | 3 | 3 | 3 | 0.30102999 | 0.03070643 | 6 | 6 | 0.08289318 | 0.63695542 |
| chrX | 129538952 | 129544319 | 5368   | 2 | 4 | 3 | 0.47744371 | 0.01598258 | 2 | 7 | 0.0429175  | 0.84395715 |
| chrX | 129544319 | 129730222 | 185904 | 2 | 3 | 3 | 0.30102999 | 0.03070643 | 6 | 6 | 0.08289318 | 0.63695542 |
| chrX | 129730222 | 129757856 | 27635  | 2 | 5 | 3 | 0.68214471 | 0.01598258 | 2 | 7 | 0.02162467 | 0.84395715 |
| chrX | 129757856 | 129864039 | 106184 | 3 | 4 | 3 | 0.47744371 | 0.01598258 | 4 | 7 | 0.0429175  | 0.84395715 |
| chrX | 129864039 | 130014984 | 150946 | 4 | 1 | 3 | 0.05404976 | 0.01598258 | 6 | 3 | 0.30102999 | 0.84395715 |
| chrX | 130014984 | 130180147 | 165164 | 2 | 1 | 3 | 0.05404976 | 0.03070643 | 6 | 2 | 0.30102999 | 0.63695542 |
| chrX | 130180147 | 130180206 | 60     | 1 | 2 | 3 | 0.1575501  | 0.03070643 | 6 | 2 | 0.1575501  | 0.63695542 |
| chrX | 130180206 | 130280298 | 100093 | 3 | 1 | 3 | 0.05404976 | 0.03070643 | 6 | 2 | 0.30102999 | 0.63695542 |
| chrX | 130280298 | 130280357 | 60     | 1 | 2 | 3 | 0.1575501  | 0.01598258 | 2 | 7 | 0.1575501  | 0.84395715 |
| chrX | 130280357 | 130407478 | 127122 | 2 | 1 | 3 | 0.05404976 | 0.01598258 | 2 | 7 | 0.30102999 | 0.84395715 |
| chrX | 130407478 | 130426722 | 19245  | 3 | 2 | 3 | 0.1575501  | 0.01598258 | 2 | 7 | 0.1575501  | 0.84395715 |
| chrX | 130426722 | 130571153 | 144432 | 2 | 1 | 3 | 0.05404976 | 0.03070643 | 2 | 6 | 0.30102999 | 0.63695542 |
| chrX | 130571153 | 130609011 | 37859  | 2 | 1 | 4 | 0.05404976 | 0.06713722 | 2 | 6 | 0.30102999 | 0.44141547 |
| chrX | 130609011 | 130725019 | 116009 | 3 | 0 | 4 | 0          | 0.06713722 | 2 | 6 | 0.61140001 | 0.44141547 |
| chrX | 130725019 | 130725078 | 60     | 1 | 1 | 4 | 0.05404976 | 0.06713722 | 2 | 6 | 0.30102999 | 0.44141547 |
| chrX | 130725078 | 130779931 | 54854  | 1 | 0 | 4 | 0          | 0.06713722 | 2 | 6 | 0.61140001 | 0.44141547 |
| chrX | 130779931 | 130892003 | 110273 | 2 | 0 | 4 | 0          | 0.06713722 | 3 | 6 | 0.93173516 | 0.44141547 |
| chrX | 130892003 | 130892062 | 60     | 1 | 1 | 5 | 0.02438896 | 0.12309572 | 3 | 6 | 0.51676182 | 0.30102999 |
| chrX | 130892062 | 130906017 | 70356  | 1 | 5 | 5 | 0.05404976 | 0.12309572 | 2 | 6 | 0.30102999 | 0.30102999 |
| chrX | 130906017 | 131029524 | 68908  | 1 | 1 | 4 | 0.05404976 | 0.06713722 | 2 | 6 | 0.30102999 | 0.44141547 |
| chrX | 131029524 | 131070932 | 41409  | 2 | 1 | 5 | 0.05404976 | 0.12309572 | 2 | 6 | 0.30102999 | 0.30102999 |
| chrX | 131070932 | 131166270 | 95339  | 3 | 1 | 6 | 0.05404976 | 0.20064824 | 2 | 6 | 0.30102999 | 0.20064824 |
| chrX | 131166270 | 131207386 | 41117  | 2 | 1 | 6 | 0.05404976 | 0.12309572 | 2 | 6 | 0.30102999 | 0.30102999 |
| chrX | 131207386 | 131234994 | 27609  | 1 | 0 | 5 | 0          | 0.19510895 | 2 | 5 | 0.61140001 | 0.19510895 |
| chrX | 131234994 | 131280915 | 45922  | 2 | 0 | 6 | 0          | 0.30102999 | 2 | 5 | 0.61140001 | 0.12309572 |
| chrX | 131280915 | 131348500 | 67586  | 2 | 0 | 6 | 0          | 0.20064824 | 2 | 6 | 0.61140001 | 0.20064824 |
| chrX | 131348500 | 131433758 | 85259  | 2 | 0 | 6 | 0          | 0.30102999 | 2 | 5 | 0.61140001 | 0.12309572 |
| chrX | 131433758 | 131515431 | 81674  | 2 | 0 | 6 | 0          | 0.30102999 | 3 | 5 | 0.93173516 | 0.12309572 |
| chrX | 131515431 | 131620050 | 104620 | 4 | 0 | 6 | 0          | 0.44141547 | 3 | 4 | 0.93173516 | 0.06713722 |
| chrX | 131620050 | 131722307 | 102258 | 1 | 0 | 5 | 0          | 0.30102999 | 3 | 4 | 0.93173516 | 0.11390336 |
| chrX | 131722307 | 131817692 | 95386  | 2 | 0 | 4 | 0          | 0.18734596 | 3 | 4 | 0.93173516 | 0.18734596 |
| chrX | 131817692 | 131910946 | 93255  | 4 | 0 | 4 | 0          | 0.18734596 | 4 | 4 | 1.26272838 | 0.18734596 |
| chrX | 131910946 | 131911005 | 60     | 1 | 1 | 4 | 0.01091641 | 0.18734596 | 4 | 4 | 0.76005302 | 0.18734596 |
| chrX | 131911005 | 131982242 | 71238  | 2 | 0 | 0 | 0          | 0.10122019 | 4 | 4 | 1.26272838 | 0.30102999 |
| chrX | 131982242 | 131982301 | 60     | 1 | 0 | 5 | 0          | 0.30102999 | 4 | 4 | 1.26272838 | 0.11390336 |
| chrX | 131982301 | 132222801 | 240501 | 4 | 0 | 3 | 0          | 0.10122019 | 4 | 4 | 1.26272838 | 0.30102999 |
| chrX | 132222801 | 132435274 | 212474 | 3 | 0 | 3 | 0          | 0.10122019 | 3 | 4 | 0.93173516 | 0.30102999 |
| chrX | 132435274 | 132543444 | 108171 | 4 | 0 | 3 | 0          | 0.05670724 | 5 | 5 | 0.93173516 | 0.45545077 |
| chrX | 132543444 | 132612390 | 68947  | 2 | 0 | 3 | 0          | 0.05670724 | 4 | 5 | 1.26272838 | 0.45545077 |
| chrX | 132612390 | 132669976 | 57587  | 1 | 0 | 3 | 0          | 0.05670724 | 3 | 5 | 0.93173516 | 0.45545077 |
| chrX | 132669976 | 132695910 | 25935  | 2 | 0 | 3 | 0          | 0.03070643 | 6 | 6 | 0.93173516 | 0.63695542 |
| chrX | 132695910 | 132834006 | 138097 | 3 | 2 | 3 | 0.08289318 | 0.03070643 | 3 | 6 | 0.30102999 | 0.63695542 |
| chrX | 132834006 | 132834065 | 60     | 1 | 2 | 3 | 0.0429175  | 0.03070643 | 4 | 6 | 0.47744371 | 0.63695542 |
| chrX | 132834065 |           |        |   |   |   |            |            |   |   |            |            |

|      |           |           |        |    |   |   |           |            |   |   |            |            |
|------|-----------|-----------|--------|----|---|---|-----------|------------|---|---|------------|------------|
| chrX | 135488154 | 135615273 | 127120 | 4  | 0 | 4 | 0         | 0.06713722 | 2 | 6 | 0.6114001  | 0.44141547 |
| chrX | 135615273 | 135638324 | 23052  | 2  | 0 | 5 | 0         | 0.12309572 | 2 | 6 | 0.6114001  | 0.30102999 |
| chrX | 135638324 | 135678075 | 39752  | 1  | 0 | 4 | 0         | 0.06713722 | 2 | 6 | 0.6114001  | 0.44141547 |
| chrX | 135678075 | 135732433 | 54359  | 2  | 0 | 4 | 0         | 0.03812622 | 2 | 7 | 0.6114001  | 0.60763643 |
| chrX | 135732433 | 135732492 | 60     | 1  | 0 | 5 | 0         | 0.07511598 | 2 | 7 | 0.6114001  | 0.43181735 |
| chrX | 135732492 | 135825882 | 93391  | 2  | 0 | 4 | 0         | 0.03812622 | 2 | 7 | 0.6114001  | 0.60763643 |
| chrX | 135825882 | 135850631 | 24750  | 2  | 0 | 4 | 0         | 0.02074938 | 2 | 8 | 0.6114001  | 0.79906872 |
| chrX | 135850631 | 135863290 | 12660  | 2  | 0 | 4 | 0         | 0.02074938 | 3 | 8 | 0.93173516 | 0.79906872 |
| chrX | 135863290 | 135961094 | 97805  | 2  | 0 | 3 | 0         | 0.0079614  | 1 | 8 | 0.30102999 | 1.07548421 |
| chrX | 135961094 | 135961153 | 60     | 1  | 0 | 5 | 0         | 0.04407651 | 2 | 8 | 0.6114001  | 0.58747015 |
| chrX | 135961153 | 135961940 | 788    | 1  | 0 | 5 | 0         | 0.07511598 | 2 | 7 | 0.6114001  | 0.43181735 |
| chrX | 135961940 | 135996354 | 34415  | 1  | 0 | 3 | 0         | 0.03070643 | 2 | 6 | 0.6114001  | 0.63695542 |
| chrX | 135996354 | 135996413 | 60     | 1  | 0 | 3 | 0         | 0.01598258 | 2 | 7 | 0.6114001  | 0.84395715 |
| chrX | 135996413 | 136077253 | 80841  | 1  | 0 | 3 | 0         | 0.01598258 | 1 | 7 | 0.30102999 | 0.84395715 |
| chrX | 136077253 | 136077312 | 60     | 1  | 1 | 4 | 0.1218695 | 0.02074938 | 1 | 8 | 0.1218695  | 0.79906872 |
| chrX | 136077312 | 136112474 | 35163  | 1  | 1 | 2 | 0.1218695 | 0.00493743 | 1 | 7 | 0.1218695  | 1.16581773 |
| chrX | 136112474 | 136175989 | 63516  | 1  | 0 | 2 | 0         | 0.00493743 | 1 | 7 | 0.30102999 | 1.16581773 |
| chrX | 136175989 | 136176048 | 60     | 1  | 0 | 5 | 0         | 0.04407651 | 1 | 8 | 0.30102999 | 0.58747015 |
| chrX | 136176048 | 136357271 | 181224 | 1  | 0 | 4 | 0         | 0.02074938 | 1 | 8 | 0.30102999 | 0.79906872 |
| chrX | 136357271 | 136470844 | 113574 | 1  | 0 | 4 | 0         | 0.06713722 | 1 | 6 | 0.30102999 | 0.44141547 |
| chrX | 136470844 | 136601621 | 130778 | 1  | 0 | 3 | 0         | 0.05670724 | 1 | 5 | 0.30102999 | 0.45545077 |
| chrX | 136601621 | 136707516 | 105896 | 2  | 0 | 2 | 0         | 0.02162467 | 1 | 5 | 0.30102999 | 0.68214471 |
| chrX | 136707516 | 136771929 | 64414  | 3  | 0 | 2 | 0         | 0.01053319 | 2 | 1 | 0.30102999 | 0.91219088 |
| chrX | 136771929 | 136771988 | 60     | 1  | 1 | 2 | 0         | 0.00221948 | 1 | 8 | 0.30102999 | 1.44210395 |
| chrX | 136771988 | 136863382 | 91395  | 1  | 0 | 2 | 0         | 0.00493743 | 1 | 7 | 0.30102999 | 1.16581773 |
| chrX | 136863382 | 137041064 | 177883 | 2  | 0 | 2 | 0         | 0.01053319 | 1 | 6 | 0.30102999 | 0.91219088 |
| chrX | 137041064 | 137041123 | 60     | 1  | 0 | 2 | 0         | 0.00221948 | 1 | 8 | 0.30102999 | 1.44210395 |
| chrX | 137041123 | 137303906 | 262784 | 2  | 0 | 2 | 0         | 0.00493743 | 2 | 1 | 0.30102999 | 1.16581773 |
| chrX | 137303906 | 137697632 | 393727 | 5  | 0 | 2 | 0         | 0.00221948 | 1 | 8 | 0.30102999 | 1.44210395 |
| chrX | 137697632 | 137697691 | 60     | 1  | 1 | 3 | 0.1218695 | 0.0079614  | 1 | 8 | 0.1218695  | 1.07548421 |
| chrX | 137697691 | 137790959 | 93269  | 4  | 0 | 3 | 0         | 0.0079614  | 1 | 8 | 0.30102999 | 1.07548421 |
| chrX | 137790959 | 137823607 | 32649  | 2  | 1 | 3 | 0.1218695 | 0.0079614  | 1 | 8 | 0.1218695  | 1.07548421 |
| chrX | 137823607 | 138038516 | 214910 | 5  | 0 | 3 | 0         | 0.0079614  | 1 | 8 | 0.30102999 | 1.07548421 |
| chrX | 138038516 | 138556249 | 517734 | 8  | 1 | 3 | 0.1218695 | 0.0079614  | 1 | 8 | 0.1218695  | 1.07548421 |
| chrX | 138556249 | 138669943 | 113695 | 4  | 1 | 4 | 0.1218695 | 0.02074938 | 1 | 8 | 0.1218695  | 0.79906872 |
| chrX | 138669943 | 138727793 | 57851  | 2  | 1 | 3 | 0.1218695 | 0.0079614  | 1 | 8 | 0.1218695  | 1.07548421 |
| chrX | 138727793 | 138923240 | 195448 | 5  | 1 | 4 | 0.1218695 | 0.02074938 | 1 | 8 | 0.1218695  | 0.79906872 |
| chrX | 138923240 | 139065525 | 142286 | 3  | 1 | 3 | 0.1218695 | 0.0079614  | 1 | 8 | 0.1218695  | 1.07548421 |
| chrX | 139065525 | 139153130 | 87606  | 1  | 0 | 3 | 0         | 0.01598258 | 1 | 7 | 0.30102999 | 0.84395715 |
| chrX | 139153130 | 139153189 | 60     | 1  | 0 | 4 | 0         | 0.03812622 | 1 | 7 | 0.30102999 | 0.60763643 |
| chrX | 139153189 | 139347579 | 194391 | 2  | 0 | 3 | 0         | 0.01598258 | 1 | 7 | 0.30102999 | 0.84395715 |
| chrX | 139347579 | 139347638 | 60     | 1  | 0 | 5 | 0         | 0.07511598 | 1 | 7 | 0.30102999 | 0.43181735 |
| chrX | 139347638 | 139585653 | 238016 | 4  | 0 | 4 | 0         | 0.03812622 | 1 | 7 | 0.30102999 | 0.60763643 |
| chrX | 139585653 | 139801223 | 215571 | 2  | 0 | 3 | 0         | 0.01598258 | 1 | 7 | 0.30102999 | 0.84395715 |
| chrX | 139801223 | 139879179 | 77957  | 3  | 0 | 4 | 0         | 0.03812622 | 1 | 7 | 0.30102999 | 0.60763643 |
| chrX | 139879179 | 139934533 | 55355  | 1  | 0 | 4 | 0         | 0.06713722 | 1 | 6 | 0.30102999 | 0.44141547 |
| chrX | 139934533 | 139993698 | 59166  | 1  | 0 | 3 | 0         | 0.03070643 | 1 | 6 | 0.30102999 | 0.63695542 |
| chrX | 139993698 | 140076700 | 83003  | 4  | 0 | 3 | 0         | 0.01598258 | 1 | 7 | 0.30102999 | 0.84395715 |
| chrX | 140076700 | 140353150 | 276451 | 4  | 0 | 3 | 0         | 0.03070643 | 1 | 6 | 0.30102999 | 0.63695542 |
| chrX | 140353150 | 140471097 | 117948 | 2  | 0 | 1 | 0         | 0.05670724 | 1 | 5 | 0.30102999 | 0.45545077 |
| chrX | 140471097 | 140828985 | 357889 | 6  | 0 | 3 | 0         | 0.03070643 | 1 | 6 | 0.30102999 | 0.63695542 |
| chrX | 140828985 | 140980034 | 151050 | 2  | 0 | 3 | 0         | 0.05670724 | 1 | 5 | 0.30102999 | 0.45545077 |
| chrX | 140980034 | 140980093 | 60     | 1  | 0 | 3 | 0         | 0.03070643 | 1 | 6 | 0.30102999 | 0.63695542 |
| chrX | 140980093 | 141124119 | 144027 | 3  | 0 | 3 | 0         | 0.05670724 | 1 | 5 | 0.30102999 | 0.45545077 |
| chrX | 141124119 | 141124178 | 60     | 1  | 0 | 3 | 0         | 0.03070643 | 1 | 6 | 0.30102999 | 0.63695542 |
| chrX | 141124178 | 141260231 | 136054 | 2  | 0 | 3 | 0         | 0.05670724 | 1 | 5 | 0.30102999 | 0.45545077 |
| chrX | 141260231 | 141260290 | 60     | 1  | 0 | 3 | 0         | 0.01598258 | 1 | 7 | 0.30102999 | 0.84395715 |
| chrX | 141260290 | 141290300 | 30011  | 1  | 0 | 3 | 0         | 0.03070643 | 1 | 6 | 0.30102999 | 0.63695542 |
| chrX | 141290300 | 141407554 | 117255 | 1  | 0 | 2 | 0         | 0.01053319 | 1 | 6 | 0.30102999 | 0.91219088 |
| chrX | 141407554 | 141490998 | 83445  | 2  | 0 | 3 | 0         | 0.03070643 | 1 | 6 | 0.30102999 | 0.63695542 |
| chrX | 141490998 | 141491057 | 60     | 1  | 0 | 4 | 0         | 0.06713722 | 1 | 6 | 0.30102999 | 0.44141547 |
| chrX | 141491057 | 141607533 | 116477 | 1  | 0 | 2 | 0         | 0.01053319 | 1 | 6 | 0.30102999 | 0.91219088 |
| chrX | 141607533 | 141727608 | 120076 | 2  | 0 | 2 | 0         | 0.00493743 | 1 | 7 | 0.30102999 | 1.16581773 |
| chrX | 141727608 | 141978051 | 250444 | 3  | 0 | 4 | 0         | 0.03812622 | 1 | 7 | 0.30102999 | 0.60763643 |
| chrX | 141978051 | 142180738 | 202688 | 3  | 0 | 4 | 0         | 0          | 0 | 7 | 0          | 0.60763643 |
| chrX | 142180738 | 142263193 | 82456  | 1  | 0 | 2 | 0         | 0.03812622 | 1 | 0 | 0          | 1.16581773 |
| chrX | 142263193 | 142263252 | 60     | 1  | 0 | 2 | 0         | 0.00493743 | 1 | 7 | 0.30102999 | 1.16581773 |
| chrX | 142263252 | 142444619 | 181368 | 2  | 0 | 1 | 0         | 8.47E-04   | 1 | 1 | 0.30102999 | 1.62048027 |
| chrX | 142444619 | 142444678 | 60     | 1  | 0 | 2 | 0         | 0.00493743 | 1 | 7 | 0.30102999 | 1.16581773 |
| chrX | 142444678 | 142506185 | 61508  | 1  | 0 | 1 | 0         | 0.00478973 | 1 | 5 | 0.30102999 | 1.02643191 |
| chrX | 142506185 | 142583699 | 77515  | 3  | 0 | 2 | 0         | 0.02162467 | 1 | 5 | 0.30102999 | 0.68214471 |
| chrX | 142583699 | 142716749 | 133051 | 3  | 0 | 1 | 0         | 0.00478973 | 1 | 5 | 0.30102999 | 1.02643191 |
| chrX | 142716749 | 142763883 | 47135  | 2  | 0 | 1 | 0         | 0.01091641 | 1 | 4 | 0.30102999 | 0.76005302 |
| chrX | 142763883 | 143125803 | 361921 | 6  | 0 | 2 | 0         | 0.02162467 | 1 | 5 | 0.30102999 | 0.68214471 |
| chrX | 143125803 | 143403124 | 277322 | 2  | 0 | 1 | 0         | 0.00478973 | 1 | 5 | 0.30102999 | 1.02643191 |
| chrX | 143403124 | 143919443 | 516320 | 2  | 0 | 0 | 0         | 0          | 1 | 5 | 0.30102999 | 1.60515106 |
| chrX | 143919443 | 143969205 | 49763  | 2  | 0 | 1 | 0         | 0.00478973 | 1 | 5 | 0.30102999 | 1.02643191 |
| chrX | 143969205 | 144178861 | 209657 | 2  | 0 | 1 | 0         | 0.01091641 | 2 | 1 | 0.30102999 | 0.76005302 |
| chrX | 144178861 | 144703386 | 524526 | 6  | 0 | 1 | 0         | 0.00478973 | 1 | 5 | 0.30102999 | 1.02643191 |
| chrX | 144703386 | 144853176 | 149791 | 3  | 0 | 1 | 0         | 0.00204627 | 1 | 6 | 0.30102999 | 1.31360226 |
| chrX | 144853176 | 145044731 | 191556 | 6  | 0 | 2 | 0         | 0.01053319 | 1 | 6 | 0.30102999 | 0.91219088 |
| chrX | 145044731 | 145125574 | 80844  | 4  | 0 | 3 | 0         | 0.03070643 | 1 | 6 | 0.30102999 | 0.63695542 |
| chrX | 145125574 | 145125633 | 60     | 1  | 0 | 3 | 0         | 0.01598258 | 1 | 7 | 0.30102999 | 0.84395715 |
| chrX | 145125633 | 14533684  | 228052 | 2  | 0 | 2 | 0         | 0.00493743 | 1 | 7 | 0.30102999 | 1.16581773 |
| chrX | 14533684  | 145534845 | 181162 | 3  | 0 | 3 | 0         | 0.01598258 | 1 | 7 | 0.30102999 | 0.84395715 |
| chrX | 145534845 | 145708990 | 174146 | 3  | 0 | 4 | 0         | 0.03812622 | 1 | 7 | 0.30102999 | 0.60763643 |
| chrX | 145708990 | 145709049 | 60     | 1  | 0 | 4 | 0         | 0.02074938 | 1 | 8 | 0.30102999 | 0.79906872 |
| chrX | 145709049 | 145799761 | 90713  | 1  | 0 | 4 | 0         | 0.03812622 | 1 | 7 | 0.30102999 | 0.60763643 |
| chrX | 145799761 | 145930792 | 131032 | 1  | 0 | 3 | 0         | 0.03070643 | 1 | 6 | 0.30102999 | 0.63695542 |
| chrX | 145930792 | 146030246 | 99455  | 2  | 0 | 3 | 0         | 0.01598258 | 1 | 7 | 0.30102999 | 0.84395715 |
| chrX | 146030246 | 146122338 | 92093  | 2  | 0 | 4 | 0         | 0.02074938 | 1 | 8 | 0.30102999 | 0.79906872 |
| chrX | 146122338 | 146994804 | 872467 | 14 | 0 | 3 | 0         | 0.0079614  | 1 | 8 | 0.30102999 | 1.07548421 |
| chrX | 146994804 | 147036855 | 42052  | 4  | 0 | 4 | 0         | 0.02074938 | 1 | 8 | 0.30102999 | 0.79906872 |
| chrX | 147036855 | 147185373 | 148519 | 4  | 0 | 4 | 0         | 0.01077081 | 1 | 9 | 0.30102999 | 1.01542894 |
| chrX | 147185373 | 147185432 | 60</   |    |   |   |           |            |   |   |            |            |

|      |           |           |        |    |   |   |            |            |   |    |            |            |
|------|-----------|-----------|--------|----|---|---|------------|------------|---|----|------------|------------|
| chrX | 150654361 | 150707800 | 53440  | 2  | 0 | 5 | 0          | 0.04407651 | 1 | 8  | 0.30102999 | 0.58747015 |
| chrX | 150707800 | 150868121 | 160322 | 4  | 0 | 4 | 0          | 0.02074938 | 1 | 8  | 0.30102999 | 0.79906872 |
| chrX | 150868121 | 150959771 | 91651  | 3  | 0 | 5 | 0          | 0.04407651 | 1 | 8  | 0.30102999 | 0.58747015 |
| chrX | 150959771 | 151424863 | 465093 | 14 | 0 | 5 | 0          | 0.02473314 | 1 | 9  | 0.30102999 | 0.76806864 |
| chrX | 151424863 | 151492231 | 67369  | 2  | 0 | 5 | 0          | 0.04407651 | 1 | 8  | 0.30102999 | 0.58747015 |
| chrX | 151492231 | 151720566 | 228336 | 7  | 0 | 5 | 0          | 0.02473314 | 1 | 9  | 0.30102999 | 0.76806864 |
| chrX | 151720566 | 151899474 | 178909 | 4  | 0 | 5 | 0          | 0.01320236 | 1 | 10 | 0.30102999 | 0.97390707 |
| chrX | 151899474 | 151996278 | 96805  | 2  | 0 | 4 | 0          | 0.00530919 | 1 | 10 | 0.30102999 | 1.2568129  |
| chrX | 151996278 | 152037726 | 41449  | 2  | 0 | 4 | 0          | 0.02074938 | 1 | 8  | 0.30102999 | 0.79906872 |
| chrX | 152037726 | 152037780 | 55     | 1  | 0 | 4 | 0          | 0.00530919 | 1 | 10 | 0.30102999 | 1.2568129  |
| chrX | 152037780 | 152111283 | 73504  | 2  | 0 | 4 | 0          | 0.01077081 | 1 | 9  | 0.30102999 | 1.01542894 |
| chrX | 152111283 | 152170338 | 59056  | 1  | 0 | 3 | 0          | 0.0079614  | 1 | 8  | 0.30102999 | 1.07548421 |
| chrX | 152170338 | 152215578 | 45241  | 2  | 0 | 3 | 0          | 0.0079614  | 2 | 8  | 0.61140001 | 1.07548421 |
| chrX | 152215578 | 152253600 | 38023  | 2  | 1 | 3 | 0.05404976 | 0.0079614  | 2 | 8  | 0.30102999 | 1.07548421 |
| chrX | 152253600 | 152253659 | 60     | 1  | 2 | 3 | 0.1575501  | 0.0079614  | 2 | 8  | 0.1575501  | 1.07548421 |
| chrX | 152253659 | 152439972 | 186314 | 2  | 0 | 3 | 0          | 0.0079614  | 1 | 8  | 0.30102999 | 1.07548421 |
| chrX | 152439972 | 152515593 | 75622  | 3  | 2 | 3 | 0.1575501  | 0.0079614  | 2 | 8  | 0.1575501  | 1.07548421 |
| chrX | 152515593 | 152660883 | 145291 | 2  | 2 | 2 | 0.1575501  | 0.00221948 | 2 | 8  | 0.1575501  | 1.44210395 |
| chrX | 152660883 | 152788477 | 127595 | 4  | 2 | 2 | 0.1575501  | 3.90E-04   | 2 | 10 | 0.1575501  | 2.0620585  |
| chrX | 152788477 | 152819509 | 31033  | 2  | 3 | 2 | 0.30102999 | 3.90E-04   | 2 | 10 | 0.08289318 | 2.0620585  |
| chrX | 152819509 | 152857869 | 38361  | 2  | 3 | 2 | 0.10122019 | 3.90E-04   | 4 | 10 | 0.30102999 | 2.0620585  |
| chrX | 152857869 | 152949847 | 91979  | 5  | 3 | 3 | 0.10122019 | 0.00170589 | 4 | 10 | 0.30102999 | 1.61091002 |
| chrX | 152949847 | 152996339 | 46493  | 2  | 3 | 3 | 0.17593012 | 0.00378107 | 3 | 9  | 0.17593012 | 1.33111237 |
| chrX | 152996339 | 153032004 | 35666  | 2  | 3 | 3 | 0.17593012 | 0.00170589 | 3 | 10 | 0.17593012 | 1.61091002 |
| chrX | 153032004 | 153061971 | 29968  | 3  | 3 | 4 | 0.17593012 | 0.00530919 | 3 | 10 | 0.17593012 | 1.2568129  |
| chrX | 153061971 | 153068333 | 6363   | 1  | 3 | 4 | 0.30102999 | 0.00530919 | 2 | 10 | 0.08289318 | 1.2568129  |
| chrX | 153068333 | 153083345 | 15013  | 1  | 3 | 3 | 0.30102999 | 0.00170589 | 2 | 10 | 0.08289318 | 1.61091002 |
| chrX | 153083345 | 153140483 | 57139  | 2  | 3 | 3 | 0.17593012 | 0.00170589 | 3 | 10 | 0.17593012 | 1.61091002 |
| chrX | 153140483 | 153277286 | 136804 | 9  | 4 | 3 | 0.30102999 | 0.00170589 | 3 | 10 | 0.10122019 | 1.61091002 |
| chrX | 153277286 | 153357717 | 80432  | 2  | 4 | 2 | 0.47744371 | 3.90E-04   | 2 | 10 | 0.0429175  | 2.0620585  |
| chrX | 153357717 | 153357772 | 56     | 1  | 4 | 2 | 0.18734596 | 3.90E-04   | 4 | 10 | 0.18734596 | 2.0620585  |
| chrX | 153357772 | 153406174 | 48403  | 1  | 4 | 2 | 0.30102999 | 3.90E-04   | 3 | 10 | 0.10122019 | 2.0620585  |
| chrX | 153406174 | 153406233 | 60     | 1  | 5 | 2 | 0.30102999 | 3.90E-04   | 4 | 10 | 0.11390336 | 2.0620585  |
| chrX | 153406233 | 153505485 | 99253  | 1  | 2 | 2 | 0.18734596 | 3.90E-04   | 4 | 10 | 0.18734596 | 2.0620585  |
| chrX | 153505485 | 153576890 | 71406  | 3  | 4 | 2 | 0.11390336 | 3.90E-04   | 5 | 10 | 0.30102999 | 2.0620585  |
| chrX | 153576890 | 153636654 | 59765  | 6  | 4 | 3 | 0.11390336 | 0.00170589 | 5 | 10 | 0.30102999 | 1.61091002 |
| chrX | 153636654 | 153713921 | 77268  | 6  | 4 | 4 | 0.11390336 | 0.00530919 | 5 | 10 | 0.30102999 | 1.2568129  |
| chrX | 153713921 | 153762015 | 48095  | 2  | 4 | 4 | 0.18734596 | 0.00530919 | 4 | 10 | 0.18734596 | 1.2568129  |
| chrX | 153762015 | 153780138 | 18124  | 3  | 4 | 4 | 0.11390336 | 0.00530919 | 5 | 10 | 0.30102999 | 1.2568129  |
| chrX | 153780138 | 153822717 | 42580  | 1  | 4 | 4 | 0.18734596 | 0.00530919 | 4 | 10 | 0.18734596 | 1.2568129  |
| chrX | 153822717 | 153877929 | 55213  | 1  | 4 | 4 | 0.18734596 | 0.01077081 | 4 | 9  | 0.18734596 | 1.01542894 |
| chrX | 153877929 | 153927923 | 49995  | 1  | 4 | 4 | 0.30102999 | 0.01077081 | 3 | 9  | 0.10122019 | 1.01542894 |
| chrX | 153927923 | 153993766 | 65844  | 2  | 3 | 4 | 0.17593012 | 0.01077081 | 3 | 9  | 0.17593012 | 1.01542894 |
| chrX | 153993766 | 154014640 | 20875  | 3  | 2 | 4 | 0.08289318 | 0.01077081 | 3 | 9  | 0.30102999 | 1.01542894 |
| chrX | 154014640 | 154032314 | 17675  | 2  | 3 | 4 | 0.17593012 | 0.01077081 | 3 | 9  | 0.17593012 | 1.01542894 |
| chrX | 154032314 | 154065263 | 32950  | 1  | 2 | 4 | 0.08289318 | 0.01077081 | 3 | 9  | 0.30102999 | 1.01542894 |
| chrX | 154065263 | 154089866 | 24604  | 1  | 2 | 3 | 0.08289318 | 0.00378107 | 3 | 9  | 0.30102999 | 1.33111237 |
| chrX | 154089866 | 154089925 | 60     | 1  | 3 | 3 | 0.17593012 | 0.00378107 | 3 | 9  | 0.17593012 | 1.33111237 |
| chrX | 154089925 | 154120738 | 30814  | 1  | 2 | 3 | 0.08289318 | 0.00378107 | 3 | 9  | 0.30102999 | 1.33111237 |
| chrX | 154120738 | 154194364 | 73627  | 4  | 2 | 4 | 0.08289318 | 0.01077081 | 3 | 9  | 0.30102999 | 1.01542894 |
| chrX | 154194364 | 154194423 | 60     | 1  | 2 | 4 | 0.08289318 | 0.00530919 | 3 | 10 | 0.30102999 | 1.2568129  |
| chrX | 154194423 | 154490709 | 296287 | 11 | 1 | 4 | 0.05404976 | 0.00530919 | 2 | 10 | 0.30102999 | 1.2568129  |
| chrX | 154490709 | 154631404 | 140696 | 3  | 1 | 4 | 0.05404976 | 0.01077081 | 2 | 9  | 0.30102999 | 1.01542894 |
| chrX | 154631404 | 154722370 | 90967  | 2  | 1 | 3 | 0.05404976 | 0.0079614  | 2 | 8  | 0.30102999 | 1.07548421 |
| chrX | 154722370 | 154722429 | 60     | 1  | 1 | 4 | 0.05404976 | 0.02074938 | 2 | 8  | 0.30102999 | 0.79906872 |
| chrX | 154722429 | 154754171 | 31743  | 1  | 1 | 3 | 0.05404976 | 0.0079614  | 2 | 8  | 0.30102999 | 1.07548421 |
| chrX | 154754171 | 155074364 | 320194 | 8  | 1 | 3 | 0.05404976 | 0.01598258 | 2 | 7  | 0.30102999 | 0.84395715 |
| chrX | 155074364 | 155134029 | 59666  | 3  | 1 | 1 | 0.05404976 | 8.47E-04   | 2 | 7  | 0.30102999 | 1.62048027 |
| chrX | 155134029 | 155159533 | 25505  | 2  | 1 | 2 | 0.05404976 | 0.00493743 | 2 | 7  | 0.30102999 | 1.16581773 |
| chrX | 155159533 | 155169996 | 10464  | 1  | 1 | 2 | 0.05404976 | 0.02162467 | 2 | 5  | 0.30102999 | 0.68214471 |
| chrX | 155169996 | 155232907 | 62912  | 4  | 1 | 3 | 0.05404976 | 0.05670724 | 2 | 5  | 0.30102999 | 0.45545077 |
