# Supplementary material for: Identification by array comparative genomic hybridization of a new amplicon on chromosome 17q highly recurrent in BRCA1 mutated triple negative breast cancer
Source: PubMed Central journal article supplement (PMC4303204; doi:10.1186/s13058-014-0466-y), 2014-11-22
Supplement: 13058_2014_466_MOESM2_ESM.pdf [file 13058_2014_466_MOESM2_ESM.pdf]

| Chromosomes | Cytobandes      | Max. % Gains | Max. % Losses |
|-------------|-----------------|--------------|---------------|
| chr1        | p36.31          | 4,35         | 23,81         |
| chr1        | p36.22          | 9,94         | 34,99         |
| chr1        | p36.13 - p36.12 | 9,52         | 34,99         |
| chr1        | p35.3 - p35.2   | 5,18         | 29,40         |
| chr1        | p34.3 - p31.3   | 29,40        | 23,81         |
| chr1        | p31.1           | 24,22        | 5,59          |
| chr1        | p22.3 - p21.2   | 28,57        | 24,22         |
| chr1        | q24.2 - q32.3   | 49,69        | 8,70          |
| chr2        | p24.2 - p24.1   | 24,22        | 8,70          |
| chr2        | p22.3 - p22.2   | 34,16        | 4,35          |
| chr2        | p21 - p16.3     | 29,40        | 4,35          |
| chr2        | p16.1 - p13.3   | 29,40        | 4,35          |
| chr2        | q13 - q14.3     | 9,52         | 28,99         |
| chr2        | q21.2 - q22.1   | 9,94         | 28,57         |
| chr2        | q23.1 - q23.2   | 3,93         | 23,81         |
| chr2        | q31.1 - q31.2   | 3,93         | 24,22         |
| chr2        | q32.2           | 3,93         | 24,22         |
| chr2        | q33.1           | 0,41         | 23,81         |
| chr2        | q35             | 4,76         | 24,22         |
| chr2        | q36.2 - q37.3   | 4,76         | 34,58         |
| chr3        | p26.3           | 23,81        | 3,93          |
| chr3        | p26.1 - p25.3   | 24,22        | 23,81         |
| chr3        | p23             | 0,41         | 29,81         |
| chr3        | p21.31          | 4,76         | 37,89         |
| chr3        | p21.1 - p14.3   | 1,40         | 37,47         |
| chr3        | p14.1 - p13     | 4,76         | 36,23         |
| chr3        | p12.2           | 4,76         | 28,99         |
| chr3        | q11.2 - q12.1   | 23,81        | 23,81         |
| chr3        | q13.12          | 24,22        | 0,00          |
| chr3        | q13.2           | 15,11        | 23,81         |
| chr3        | q13.31 - q13.33 | 24,22        | 23,81         |
| chr3        | q21.2 - q21.3   | 7,87         | 24,22         |
| chr4        | p16.3 - p14     | 13,04        | 40,58         |
| chr4        | q12             | 29,40        | 23,81         |
| chr4        | q13.2 - q13.3   | 28,99        | 3,52          |
| chr4        | q21.1 - q21.21  | 28,99        | 11,80         |
| chr4        | q27             | 28,57        | 2,07          |
| chr4        | q28.3           | 23,81        | 23,81         |
| chr4        | q31.1 - q31.21  | 23,81        | 7,87          |
| chr4        | q32.1 - q32.3   | 0,00         | 34,58         |
| chr4        | q34.3           | 4,76         | 29,40         |
| chr4        | q35.2           | 4,76         | 41,41         |
| chr5        | p15.2           | 28,57        | 4,76          |
| chr5        | p14.2           | 24,22        | 4,35          |
| chr5        | p13.3           | 24,22        | 0,83          |
| chr5        | q13.1           | 0,00         | 40,17         |
| chr5        | q14.1 - q15     | 0,00         | 40,58         |
| chr5        | q21.1 - q21.3   | 0,00         | 33,13         |
| chr5        | q22.2           | 4,35         | 36,65         |
| chr5        | q23.1           | 0,00         | 29,81         |
| chr5        | q31.1 - q32     | 0,00         | 40,99         |
| chr5        | q33.2 - q34     | 4,76         | 35,40         |
| chr6        | p12.2 - p11.2   | 29,81        | 4,76          |
| chr6        | q13 - q14.3     | 24,22        | 19,05         |
| chr6        | q16.1           | 24,22        | 14,29         |
| chr6        | q16.3           | 24,22        | 10,35         |
| chr6        | q22.31 - q23.2  | 34,16        | 14,29         |
| chr6        | q24.2           | 24,22        | 5,59          |
| chr6        | q25.1 - q25.2   | 23,81        | 28,99         |
| chr7        | p22.1           | 21,33        | 3,52          |
| chr7        | p15.2 - p14.2   | 23,81        | 24,22         |
| chr7        | p13             | 10,77        | 24,22         |
| chr7        | q11.22 - q11.23 | 15,11        | 24,22         |
| chr7        | q35 - q36.1     | 29,81        | 6,00          |

|       |                 |       |       |
|-------|-----------------|-------|-------|
| chr8  | p12             | 5,18  | 34,58 |
| chr8  | p21.3 - p21.2   | 0,00  | 36,65 |
| chr8  | q11.21          | 35,40 | 4,35  |
| chr8  | q13.1           | 35,82 | 0,41  |
| chr8  | q21.11          | 35,82 | 4,76  |
| chr8  | q22.1           | 37,47 | 0,00  |
| chr8  | q24.3           | 25,47 | 5,18  |
| chr9  | p24.3 - p24.2   | 3,52  | 24,22 |
| chr9  | p23             | 3,11  | 23,81 |
| chr9  | p22.3           | 6,00  | 24,22 |
| chr9  | p22.1           | 24,22 | 19,46 |
| chr9  | p21.3 - p21.2   | 24,22 | 24,22 |
| chr9  | p13.3 - p13.2   | 24,22 | 20,29 |
| chr9  | q22.31 - q22.33 | 5,18  | 24,22 |
| chr9  | q31.2           | 0,00  | 24,22 |
| chr9  | q32 - q34.11    | 4,76  | 35,40 |
| chr9  | q34.13 - q34.3  | 4,35  | 40,17 |
| chr10 | p12.33 - p12.1  | 45,76 | 0,00  |
| chr10 | p11.21          | 35,40 | 4,76  |
| chr10 | q11.22 - q21.3  | 19,46 | 28,57 |
| chr10 | q23.1 - q23.2   | 8,28  | 29,40 |
| chr10 | q24.1 - q26.3   | 4,35  | 49,28 |
| chr11 | p15.5 - p15.1   | 8,70  | 44,51 |
| chr11 | p13             | 19,88 | 24,22 |
| chr11 | p11.2           | 23,81 | 15,53 |
| chr11 | q12.1           | 24,22 | 9,52  |
| chr11 | q12.3           | 23,81 | 9,94  |
| chr11 | q13.4 - q14.1   | 11,18 | 28,99 |
| chr11 | q14.3           | 6,00  | 24,22 |
| chr11 | q21             | 6,83  | 28,99 |
| chr11 | q23.1           | 29,40 | 5,59  |
| chr11 | q23.3           | 29,81 | 2,48  |
| chr11 | q24.1 - q24.3   | 24,22 | 21,33 |
| chr12 | p13.31 - p11.21 | 39,34 | 14,29 |
| chr12 | q13.13 - q14.1  | 4,76  | 36,65 |
| chr12 | q21.33          | 4,76  | 29,61 |
| chr12 | q23.3 - q24.11  | 4,35  | 35,40 |
| chr12 | q24.13 - q24.21 | 4,76  | 34,99 |
| chr12 | q24.23 - q24.31 | 3,93  | 35,40 |
| chr13 | q14.12 - q14.13 | 4,35  | 40,99 |
| chr13 | q22.2           | 9,52  | 29,81 |
| chr13 | q33.2 - q33.3   | 24,22 | 8,28  |
| chr14 | q11.2           | 9,94  | 34,99 |
| chr14 | q12             | 5,18  | 34,99 |
| chr14 | q22.1           | 4,35  | 34,99 |
| chr14 | q23.1           | 0,00  | 36,23 |
| chr14 | q24.2 - q24.3   | 4,76  | 40,58 |
| chr15 | q21.2 - q22.31  | 21,33 | 35,82 |
| chr15 | q24.1 - q24.2   | 21,74 | 20,70 |
| chr15 | q26.3           | 29,40 | 15,11 |
| chr16 | q12.1 - q24.3   | 20,91 | 34,16 |
| chr17 | p13.2 - p13.1   | 9,52  | 36,65 |
| chr17 | q21.2 - q21.31  | 8,28  | 35,40 |
| chr17 | q24.1           | 24,84 | 0,41  |
| chr17 | q24.3 - q25.3   | 28,36 | 19,46 |
| chr18 | p11.32 - p11.31 | 34,16 | 5,18  |
| chr18 | p11.22 - p11.21 | 29,40 | 3,93  |
| chr18 | q12.1           | 9,94  | 25,67 |
| chr18 | q12.3           | 0,00  | 24,84 |
| chr18 | q21.31 - q21.32 | 23,81 | 20,29 |
| chr19 | p13.3 - p13.2   | 29,40 | 34,58 |
| chr19 | p13.11 - p12    | 35,40 | 10,77 |
| chr19 | q13.11 - q13.31 | 16,15 | 29,40 |
| chr19 | q13.33 - q13.43 | 21,33 | 39,75 |

|       |                |       |       |
|-------|----------------|-------|-------|
| chr20 | p13            | 6,00  | 28,99 |
| chr20 | q12            | 1,24  | 28,57 |
| chr20 | q13.13 - q13.2 | 29,81 | 4,35  |
| chr21 | q22.12 - q22.3 | 28,99 | 11,80 |
| chr22 | q12.3 - q13.33 | 33,54 | 47,62 |
| chrX  | p22.12         | 0,00  | 28,57 |
| chrX  | q21.1          | 5,18  | 34,58 |
| chrX  | q23 - q24      | 9,94  | 24,22 |
| chrX  | q26.3          | 4,76  | 29,40 |
| chrX  | q27.3 - q28    | 9,52  | 29,40 |
