# Supplementary material for: Identification by array comparative genomic hybridization of a new amplicon on chromosome 17q highly recurrent in BRCA1 mutated triple negative breast cancer
Source: PubMed Central journal article supplement (PMC4303204; doi:10.1186/s13058-014-0466-y), 2014-11-22
Supplement: 13058_2014_466_MOESM3_ESM.pdf [file 13058_2014_466_MOESM3_ESM.pdf]

**Table 3 : List of the 145 segments used to build the *BRCA1* classifier.**

The values are classified from the most important to the less important.

| Chromosome n°_start-stop  | Variable importance | Gain_Losses |
|---------------------------|---------------------|-------------|
| chr17_78260810_81029941   | 100                 | gain        |
| chrX_3542001_46323590     | 99.2277992          | losses      |
| chr19_45681759_54221324   | 94.2084942          | gain        |
| chr22_33115310_51178264   | 90.3474903          | losses      |
| chr19_28272497_45588627   | 89.5752896          | gain        |
| chr16_71251249_90111263   | 84.1698842          | gain        |
| chr10_110242525_135404523 | 81.8532819          | losses      |
| chr17_25403446_78198553   | 81.8532819          | losses      |
| chr5_30349974_44873491    | 80.3088803          | losses      |
| chr16_46564557_62705691   | 78.7644788          | gain        |
| chr10_9846848_36912799    | 76.8339768          | gain        |
| chr3_93949_48556219       | 75.6756757          | losses      |
| chr6_61982931_82004749    | 74.9034749          | losses      |
| chr2_42444_82361952       | 74.1312741          | gain        |
| chr19_54263971_59092570   | 72.2007722          | gain        |
| chr4_135347238_179738838  | 71.8146718          | losses      |
| chr1_155296964_156102366  | 71.042471           | gain        |
| chr4_39365720_42175062    | 67.953668           | gain        |
| chr5_84819841_104823961   | 67.1814672          | losses      |
| chr4_64367629_130946954   | 66.023166           | losses      |
| chr1_146564743_155289073  | 64.0926641          | gain        |
| chr11_218365_37442438     | 61.7760618          | gain        |
| chr6_117130571_170890108  | 61.7760618          | gain        |
| chr16_106271_23368052     | 60.2316602          | losses      |
| chr2_220474392_243041364  | 59.4594595          | gain        |
| chr8_8130630_42056282     | 59.4594595          | gain        |
| chr12_125012869_133447358 | 58.6872587          | gain        |
| chr11_55481624_96847330   | 57.9150579          | losses      |
| chr20_53612439_62893189   | 57.1428571          | losses      |
| chr4_59911076_63813565    | 55.984556           | losses      |
| chr18_14316_14358321      | 54.4401544          | gain        |
| chr5_151737_25469388      | 53.2818533          | gain        |
| chr5_26068066_29903010    | 53.2818533          | losses      |
| chr13_85236169_115059020  | 52.8957529          | losses      |
| chr14_20253739_55764313   | 52.8957529          | losses      |
| chr9_71035346_141008915   | 52.5096525          | losses      |
| chr1_156132786_241799145  | 51.7374517          | losses      |
| chr4_71552_18839648       | 51.7374517          | losses      |
| chr10_73348402_109862404  | 51.3513514          | gain        |
| chr15_22318597_88552022   | 50.1930502          | losses      |
| chr14_87514040_107258824  | 49.4208494          | losses      |
| chrX_46363189_88305581    | 49.4208494          | losses      |
| chr3_48603039_75275195    | 48.2625483          | losses      |
| chr7_68194327_76200216    | 47.1042471          | losses      |
| chr8_145516091_146280020  | 47.1042471          | gain        |
| chr1_88079298_104307708   | 46.7181467          | gain        |
| chr1_241913757_249212668  | 45.5598456          | losses      |

|                          |            |        |
|--------------------------|------------|--------|
| chr11_98487343_134868407 | 44.7876448 | losses |
| chr12_230421_32325134    | 44.7876448 | losses |
| chr4_52689101_59258509   | 44.7876448 | losses |
| chr6_93007777_95148784   | 44.4015444 | losses |
| chr20_121521_24590067    | 44.015444  | losses |
| chr7_76476799_153691728  | 44.015444  | gain   |
| chr13_81852809_84832155  | 43.6293436 | losses |
| chr5_165768313_177259960 | 43.6293436 | losses |
| chr10_148206_9645787     | 42.8571429 | losses |
| chr20_29888477_53352073  | 42.8571429 | gain   |
| chr16_23417375_31928113  | 42.4710425 | losses |
| chr3_117950181_197840339 | 42.0849421 | losses |
| chr8_221611_6914076      | 42.0849421 | gain   |
| chr13_19296544_81634108  | 41.6988417 | gain   |
| chr10_42889244_46158215  | 40.9266409 | gain   |
| chr3_75936605_86917377   | 40.9266409 | losses |
| chr22_25481324_28172387  | 40.5405405 | losses |
| chr6_95417726_103405100  | 40.5405405 | gain   |
| chr19_17623422_23624787  | 39.7683398 | losses |
| chr8_47681335_142680829  | 39.7683398 | gain   |
| chr11_55375127_55375186  | 39.3822394 | losses |
| chr21_14861256_14895949  | 39.3822394 | losses |
| chr3_117516385_117780353 | 39.3822394 | gain   |
| chr4_42414756_47175094   | 39.3822394 | losses |
| chr6_82363693_82577829   | 39.3822394 | losses |
| chr7_68065098_68065157   | 39.3822394 | gain   |
| chr13_85075294_85075353  | 38.6100386 | losses |
| chr3_93580736_117166718  | 38.6100386 | losses |
| chr7_92532_22527063      | 38.2239382 | gain   |
| chr6_82742906_92045753   | 37.8378378 | losses |
| chr11_39233962_49532643  | 37.0656371 | gain   |
| chr14_55818972_86933797  | 37.0656371 | losses |
| chr4_180166540_190896674 | 37.0656371 | losses |
| chr6_255350_58014532     | 36.2934363 | gain   |
| chr6_104137729_117050796 | 36.2934363 | losses |
| chr21_15170361_39528526  | 34.7490347 | gain   |
| chr5_49690172_84349709   | 33.976834  | losses |
| chr5_105623245_159900889 | 33.976834  | losses |
| chr19_327273_17531973    | 33.2046332 | gain   |
| chr9_271257_39156954     | 33.2046332 | gain   |
| chr1_38154020_87873063   | 32.8185328 | losses |
| chr22_17280847_25368098  | 32.8185328 | gain   |
| chr2_87776206_89508067   | 32.8185328 | losses |
| chr1_104852325_105300334 | 32.4324324 | gain   |
| chr11_97854495_97854554  | 32.4324324 | gain   |
| chr16_33385740_33604468  | 32.4324324 | gain   |
| chr2_82510808_83452304   | 32.4324324 | losses |
| chr2_104356251_104356310 | 32.4324324 | gain   |
| chr2_194682359_194682418 | 32.4324324 | gain   |
| chr21_39618392_48067924  | 32.4324324 | losses |
| chr4_59598916_59598975   | 30.5019305 | losses |
| chr7_63374309_67616356   | 30.5019305 | losses |

|                           |            |        |
|---------------------------|------------|--------|
| chr8_142840194_142909763  | 30.1158301 | gain   |
| chr12_42945155_124931849  | 29.7297297 | losses |
| chr4_19370059_32023735    | 29.3436293 | losses |
| chr17_87009_21199405      | 29.3436293 | losses |
| chr7_153761547_158909738  | 28.1853282 | losses |
| chr7_22609575_56786860    | 27.027027  | gain   |
| chr2_83613013_87277610    | 26.2548263 | gain   |
| chr1_759762_1054794       | 26.2548263 | gain   |
| chr12_38572677_42873860   | 26.2548263 | gain   |
| chr16_63494668_63494727   | 25.4826255 | gain   |
| chr2_146048486_146048545  | 25.4826255 | gain   |
| chr4_131400699_131916402  | 25.4826255 | gain   |
| chr5_165212295_165402101  | 25.4826255 | losses |
| chr1_1110548_38077902     | 24.7104247 | gain   |
| chr5_177383773_180684501  | 24.3243243 | losses |
| chr22_28278003_33049496   | 22.7799228 | losses |
| chr8_143008635_143577971  | 22.3938224 | losses |
| chr18_18539853_77982126   | 22.3938224 | gain   |
| chr8_143692418_145225218  | 21.6216216 | losses |
| chr2_195799327_220437841  | 21.2355212 | losses |
| chr10_47604818_53609363   | 20.8494208 | gain   |
| chr10_59028244_73247691   | 20.4633205 | gain   |
| chr4_33080365_39329273    | 20.0772201 | losses |
| chr2_110895981_110980401  | 19.6911197 | gain   |
| chr15_88628250_102465355  | 19.3050193 | losses |
| chr2_151792931_193773633  | 19.3050193 | losses |
| chrX_92377119_113767651   | 19.3050193 | gain   |
| chrX_91504849_91519622    | 19.3050193 | losses |
| chr11_38868079_38868138   | 18.5328185 | gain   |
| chr22_17096855_17154047   | 18.5328185 | losses |
| chr10_110057187_110057246 | 18.1467181 | gain   |
| chr10_53709895_58686145   | 17.7606178 | losses |
| chr4_132962005_135137668  | 16.6023166 | losses |
| chr1_106497293_145747269  | 16.2162162 | gain   |
| chr2_95529039_104099903   | 15.4440154 | losses |
| chr5_159960920_164973086  | 15.4440154 | losses |
| chr2_123973518_145827808  | 15.0579151 | gain   |
| chr21_9832448_9834682     | 13.1274131 | losses |
| chr2_111399243_123161667  | 13.1274131 | losses |
| chrX_113852609_152215637  | 13.1274131 | losses |
| chrX_152356063_152356122  | 10.4247104 | losses |
| chrX_153630137_154754171  | 8.49420849 | losses |
| chr2_104514353_110427254  | 6.56370656 | gain   |
| chrX_152485412_153609163  | 5.40540541 | losses |
| chr16_63841326_70800379   | 0.77220077 | losses |
| chr2_147008238_151128706  | 0          | gain   |
