# Supplementary material for: Identification by array comparative genomic hybridization of a new amplicon on chromosome 17q highly recurrent in BRCA1 mutated triple negative breast cancer
Source: PubMed Central journal article supplement (PMC4303204; doi:10.1186/s13058-014-0466-y), 2014-11-22
Supplement: 13058_2014_466_MOESM4_ESM.pdf [file 13058_2014_466_MOESM4_ESM.pdf]

*Additional file 4 :*

## **Supplementary material and methods.**

### **1. Analysis of The Cancer Genome Atlas Breast Invasive Carcinoma data set.**

We analysed the Breast Invasive Carcinoma data set from TCGA (TCGA, Nature 2012). This data sets of 825 samples mutation data for 507 samples, copy number data for 778 samples, expression data for 526 samples and methylation data for 311 samples. We selected TN samples that are ER, PR and HER2 negative (IHC) and of the basal-like subtype (PAM50). HER2+ samples are ER and PR positive or negative and HER2 positive and of the HER2-enriched subtype (PAM50). The luminal samples are HER2 negative (IHC) and of the Luminal A or B subtype (PAM50) (table 5). The data were retrieved through the cBioPortal for Cancer Genomics site (<http://www.cbioportal.org/public-portal/>) or directly through the TCGA data portal (<https://tcga-data.nci.nih.gov/tcga/>). In this TCGA cohort, we found 14 samples with mutation in *BRCA1* (10 triple negative BC, 3 Lum A BC, 1 HER2+ BC).

CNV data were retrieved as log<sub>2</sub> ratio for the genes in the 17q25.3 region, and genes with a log<sub>2</sub> ratio above 0.2 were considered as gain.

For expression data analyses, Z-score were retrieved for the genes in the 17q25.3 region. The Z-score value indicates the number of standard deviations away from the mean of expression in the reference population. This measure determines whether a gene is up- or down-regulated relative to the normal samples or all other tumor samples.

HM27 methylation data are also available. The measure of the level of DNA methylation at each CpG site is scored as beta values ranging from 0 to 1, with values close to 0 indicating low levels of DNA methylation and values close to 1 indicating high levels of DNA methylation. Samples with HM27 beta value >0.5 and *BRCA1* expression downregulation were considered as methylated.

## 2. Construction of a predictive model

### STEP 1: Reference Segment definition

The segments are defined per sample using the Agilent algorithm Z-score. Overlapping segments are merged together in larger segments using the *reduce* function available in the R Bioconductor *GenomicRanges* package (<http://www.bioconductor.org/packages/release/bioc/html/GenomicRanges.html>). A total of 145 segments were defined (Additional file 4, Table S3). These segments are used as a common reference for all samples.

### STEP 2: Value per reference segment per sample

For each reference segment defined in step 1 and each sample, the mean value is calculated. Ex: if sample 3 has aberrations in segments 4 and 10 (segments found for that sample), that are both contained in reference segment 2, we compute the mean value:  $(\text{value for segment 4} + \text{value for segment 10})/2$ . If no segment for that sample is found as being part of the reference segment, we assign 0 as value.

This results in a quite sparse matrix (= matrix with many 0's). Methods like Support Vector Machine (SVM) are robust against sparse data matrix. Moreover SVM allows to build models for high-dimensional data sets.

### STEP 3: Building the model

A training set was created with 75% of each tumour group (34 samples). The remaining samples (25%) were used for validation (10 samples). SVM as implemented in the R package 'e1071' (<http://cran.r-project.org/web/packages/e1071/index.html>) and wrapped in the R package 'caret' (<http://caret.r-forge.r-project.org/>) has been used for building the model.

The area under the ROC curve (Receiver Operating Characteristic curve) has been chosen as the performance measure. The Leave-One-Out Cross-Validation method has been selected for model validation.

The parameters C and sigma were tuned to get their optimal values (maximizing the area under the ROC curve, or AUC): tested values for C = 0.25,0.5,1 and sigma = 0.001 to 0.01 with a step of 0.001.

## Supplementary Results

### 1. Construction of a predictive model

A predicting model has been built based on 145 variables using SVM. The following parameter values were chosen:  $C = 0.5$  and  $\sigma = 0.004$ . Those values were selected for 2 reasons: they show a high AUC and a stable AUC (a small change in these parameter values does not degrade the AUC).

With the built model, we reach an  $AUC = 0.8$  both in the validation set and in the test set, which indicates a stability of the model and reduce the risk of overfitting. The most important variables as defined by the *varImp* function available in the 'e1071' package are given in the table S3.

We tried to reduce the model to the 20 most important variables. This operation resulted in a decrease of the AUC to 0.7. Reducing the model to the 5 most important variables decreased the AUC to 0.6. The density plots of the 5 most important variables are showed in figure S1.

The most important variable is chr17\_78260810\_81029941, which was also the one previously selected. Using this model, we were able to assign 21/23 BRCA1 mutated samples to the mutated group (sensitivity of 91 % (metrics based on all data, i.e. test and validation data). All the non mutated samples (21/21) were assigned to the right class (specificity of 100%) (Table S4). The positive predictive value is 100 % and the negative predictive value is 91%.

## Supplementary Figures and tables.

Table S4 : classification results.

Probability scores for the *BRCA1* mutated and non mutated samples. The positive class is the mutated class.  
 NM : non mutated M: mutated

| BRCA1 status | M          | NM         | Selected Class |
|--------------|------------|------------|----------------|
| NM           | 0.03756681 | 0.96243319 | NM             |
| NM           | 0.06168244 | 0.93831756 | NM             |
| NM           | 0.46391593 | 0.53608407 | NM             |
| NM           | 0.01411068 | 0.98588932 | NM             |
| NM           | 0.27414678 | 0.72585322 | NM             |
| NM           | 0.29803175 | 0.70196825 | NM             |
| NM           | 0.16609179 | 0.83390821 | NM             |
| NM           | 0.01055714 | 0.98944286 | NM             |
| NM           | 0.00808346 | 0.99191654 | NM             |
| NM           | 0.0265493  | 0.9734507  | NM             |
| NM           | 0.04387822 | 0.95612178 | NM             |
| NM           | 0.47724271 | 0.52275729 | NM             |
| NM           | 0.09769137 | 0.90230863 | NM             |
| NM           | 0.05690248 | 0.94309752 | NM             |
| NM           | 0.45139672 | 0.54860328 | NM             |
| NM           | 0.00714882 | 0.99285118 | NM             |
| NM           | 0.0121659  | 0.9878341  | NM             |
| NM           | 0.29761888 | 0.70238112 | NM             |
| NM           | 0.27021516 | 0.72978484 | NM             |
| NM           | 0.0354405  | 0.9645595  | NM             |
| NM           | 0.01342016 | 0.98657984 | NM             |
| M            | 0.6447504  | 0.3552496  | M              |
| M            | 0.74249595 | 0.25750405 | M              |
| M            | 0.60887179 | 0.39112821 | M              |
| M            | 0.41955305 | 0.58044695 | NM             |
| M            | 0.11986052 | 0.88013948 | NM             |
| M            | 0.88748761 | 0.11251239 | M              |
| M            | 0.88759534 | 0.11240466 | M              |
| M            | 0.84503455 | 0.15496545 | M              |
| M            | 0.88723173 | 0.11276827 | M              |
| M            | 0.6081164  | 0.3918836  | M              |
| M            | 0.88729109 | 0.11270891 | M              |
| M            | 0.88771814 | 0.11228186 | M              |
| M            | 0.85452423 | 0.14547577 | M              |
| M            | 0.81509475 | 0.18490525 | M              |
| M            | 0.88729108 | 0.11270892 | M              |
| M            | 0.75156498 | 0.24843502 | M              |
| M            | 0.78659429 | 0.21340571 | M              |
| M            | 0.88751379 | 0.11248621 | M              |
| M            | 0.75998406 | 0.24001594 | M              |
| M            | 0.57245218 | 0.42754782 | M              |
| M            | 0.70365798 | 0.29634202 | M              |
| M            | 0.62624739 | 0.37375261 | M              |
| M            | 0.63273671 | 0.36726329 | M              |

Table S5: list of samples from the TCGA study used as a validation set. Samples in bold are *BRCA1* mutated.

| TN (n=77)    | Lum A (n=201) |              | Lum B (n=101) | HER2+ (n=38)        |
|--------------|---------------|--------------|---------------|---------------------|
| TCGA-A1-A0SK | TCGA-AN-A0XN  | TCGA-B6-A0WZ | TCGA-A2-A0SW  | TCGA-A2-A0T1        |
| TCGA-A1-A0SP | TCGA-AN-A0XS  | TCGA-B6-A0I5 | TCGA-AR-A0TY  | TCGA-BH-A0EE        |
| TCGA-A2-A04P | TCGA-B6-A0WY  | TCGA-B6-A0RV | TCGA-E2-A107  | TCGA-A2-A0D1        |
| TCGA-A2-A04Q | TCGA-BH-A0HK  | TCGA-B6-A0RO | TCGA-AO-A0JI  | TCGA-A2-A04W        |
| TCGA-A2-A04T | TCGA-A7-A0CG  | TCGA-B6-A0WT | TCGA-E2-A109  | TCGA-AO-A12D        |
| TCGA-A2-A04U | TCGA-A7-A0D9  | TCGA-B6-A0IA | TCGA-BH-A0HW  | TCGA-AO-A0JE        |
| TCGA-A2-A0CM | TCGA-BH-A0HP  | TCGA-B6-A0RI | TCGA-A2-A0CT  | TCGA-A2-A0EQ        |
| TCGA-A2-A0D0 | TCGA-A2-A0YF  | TCGA-A1-A0SE | TCGA-A8-A06N  | TCGA-A8-A08X        |
| TCGA-A2-A0ST | TCGA-A8-A091  | TCGA-A2-A0EX | TCGA-A8-A07S  | TCGA-A8-A0A7        |
| TCGA-A2-A0SX | TCGA-AN-A0FS  | TCGA-AO-A0JJ | TCGA-A8-A084  | TCGA-AN-A04C        |
| TCGA-A2-A0T0 | TCGA-AN-A0XO  | TCGA-A1-A0SD | TCGA-A8-A09Z  | TCGA-AN-A0FV        |
| TCGA-A2-A0T2 | TCGA-AN-A0XT  | TCGA-A1-A0SJ | TCGA-AN-A0AK  | TCGA-C8-A12L        |
| TCGA-A2-A0YE | TCGA-BH-A0BM  | TCGA-A8-A06P | TCGA-AN-A0AM  | TCGA-C8-A12P        |
| TCGA-A2-A0YM | TCGA-BH-A0DG  | TCGA-A8-A06T | TCGA-AN-A0AS  | TCGA-C8-A12Q        |
| TCGA-A2-A1G6 | TCGA-A2-A0CU  | TCGA-A8-A06Y | TCGA-AN-A0XR  | TCGA-C8-A12Z        |
| TCGA-A7-A0CE | TCGA-AR-A0TR  | TCGA-A8-A07E | TCGA-AR-A0TT  | TCGA-C8-A135        |
| TCGA-A7-A0DA | TCGA-B6-A0X4  | TCGA-A8-A07F | TCGA-BH-A0C3  | TCGA-C8-A137        |
| TCGA-A7-A26F | TCGA-BH-A0EA  | TCGA-A8-A07G | TCGA-E2-A155  | TCGA-E2-A14P        |
| TCGA-A7-A26G | TCGA-BH-A18N  | TCGA-A8-A07J | TCGA-E2-A15S  | TCGA-E2-A180        |
| TCGA-A7-A26I | TCGA-BH-A1EU  | TCGA-A8-A083 | TCGA-A2-A0SV  | TCGA-C8-A1HF        |
| TCGA-A8-A07C | TCGA-B6-A0X7  | TCGA-A8-A086 | TCGA-AO-A03O  | TCGA-BH-A18R        |
| TCGA-A8-A07O | TCGA-A2-A04V  | TCGA-A8-A08A | TCGA-B6-A0WW  | TCGA-BH-A0AW        |
| TCGA-A8-A08R | TCGA-B6-A0RM  | TCGA-A8-A08C | TCGA-BH-A18J  | TCGA-A2-A0CX        |
| TCGA-A8-A09X | TCGA-BH-A1ET  | TCGA-A8-A08O | TCGA-B6-A0IC  | TCGA-A8-A07I        |
| TCGA-AN-A04D | TCGA-BH-A1EO  | TCGA-A8-A08T | TCGA-B6-A0X5  | TCGA-A8-A08B        |
| TCGA-AN-A0AR | TCGA-B6-A0WS  | TCGA-A8-A08Z | TCGA-B6-A0WV  | TCGA-A8-A09G        |
| TCGA-AN-A0AT | TCGA-B6-A0RP  | TCGA-A8-A090 | TCGA-B6-A0RL  | TCGA-C8-A138        |
| TCGA-AN-A0G0 | TCGA-B6-A0IH  | TCGA-A8-A093 | TCGA-AR-A0U2  | TCGA-E2-A152        |
| TCGA-AO-A03U | TCGA-BH-A1ES  | TCGA-A8-A09A | TCGA-B6-A0IB  | TCGA-B6-A0I9        |
| TCGA-AO-A0J2 | TCGA-B6-A0X0  | TCGA-A8-A09B | TCGA-AO-A0J7  | TCGA-AR-A1AT        |
| TCGA-AO-A0J4 | TCGA-B6-A0RQ  | TCGA-A8-A09T | TCGA-AO-A0J3  | TCGA-BH-A0DZ        |
| TCGA-AO-A0J6 | TCGA-BH-A0HO  | TCGA-A8-A09V | TCGA-D8-A13Y  | TCGA-A2-A04X        |
| TCGA-AO-A0JL | TCGA-BH-A0DQ  | TCGA-A8-A0A1 | TCGA-A7-A13F  | TCGA-B6-A0RH        |
| TCGA-AO-A128 | TCGA-A7-A0DB  | TCGA-A8-A0A2 | TCGA-BH-A0HU  | TCGA-A8-A076        |
| TCGA-AO-A129 | TCGA-AO-A0J8  | TCGA-A8-A0A4 | TCGA-A7-A0CJ  | TCGA-A8-A07B        |
| TCGA-AO-A12F | TCGA-BH-A0GZ  | TCGA-A8-A0A6 | TCGA-BH-A0H0  | TCGA-AR-A0TX        |
| TCGA-AQ-A04J | TCGA-AO-A0JA  | TCGA-A8-A0AD | TCGA-BH-A0BD  | TCGA-BH-A0B7        |
| TCGA-AR-A0TS | TCGA-AO-A0JF  | TCGA-AN-A03X | TCGA-A2-A0T3  | TCGA-E2-A14V        |
| TCGA-AR-A0TU | TCGA-A7-A0CD  | TCGA-AN-A046 | TCGA-A2-A0T4  | <b>TCGA-C8-A12T</b> |
| TCGA-AR-A0U0 | TCGA-D8-A145  | TCGA-AN-A04A | TCGA-A2-A0YH  |                     |
| TCGA-AR-A0U1 | TCGA-BH-A0DK  | TCGA-AN-A0FN | TCGA-A2-A0D4  |                     |
| TCGA-AR-A1AI | TCGA-BH-A0E2  | TCGA-AN-A0XL | TCGA-BH-A0AY  |                     |
| TCGA-AR-A1AQ | TCGA-A2-A0YI  | TCGA-AN-A0XP | TCGA-E2-A10C  |                     |
| TCGA-AR-A1AR | TCGA-A2-A0YL  | TCGA-AN-A0XV | TCGA-E2-A10A  |                     |
| TCGA-AR-A1AY | TCGA-AO-A0JG  | TCGA-AR-A0TW | TCGA-AO-A0JC  |                     |
| TCGA-AR-A256 | TCGA-BH-A0DP  | TCGA-AR-A1AK | TCGA-AO-A0JD  |                     |
| TCGA-B6-A0IE | TCGA-BH-A0E1  | TCGA-AR-A1AL | TCGA-A2-A0CW  |                     |
| TCGA-B6-A0IK | TCGA-A2-A0T5  | TCGA-AR-A1AN | TCGA-A2-A0ER  |                     |
| TCGA-B6-A0IQ | TCGA-A2-A0T6  | TCGA-AR-A1AP | TCGA-AO-A12B  |                     |
| TCGA-B6-A0RE | TCGA-BH-A0HI  | TCGA-AR-A1AS | TCGA-A2-A04R  |                     |
| TCGA-B6-A0RG | TCGA-A2-A0T7  | TCGA-AR-A1AU | TCGA-B6-A0IM  |                     |
| TCGA-B6-A0RN | TCGA-BH-A0BJ  | TCGA-AR-A1AW | TCGA-AO-A03P  |                     |
| TCGA-B6-A0RS | TCGA-BH-A0H7  | TCGA-BH-A0AZ | TCGA-A8-A06O  |                     |
| TCGA-B6-A0RT | TCGA-BH-A0HF  | TCGA-BH-A0B0 | TCGA-A8-A06Q  |                     |
| TCGA-B6-A0RU | TCGA-BH-A0EB  | TCGA-BH-A0B0 | TCGA-A8-A06Z  |                     |
| TCGA-B6-A0WX | TCGA-BH-A0H6  | TCGA-BH-A0BP | TCGA-A8-A079  |                     |
| TCGA-BH-A0AV | TCGA-A2-A0YD  | TCGA-BH-A0BQ | TCGA-A8-A07L  |                     |
| TCGA-BH-A0B3 | TCGA-BH-A0HB  | TCGA-BH-A0BR | TCGA-A8-A07W  |                     |
| TCGA-BH-A0B9 | TCGA-BH-A0HX  | TCGA-BH-A0BS | TCGA-A8-A07Z  |                     |
| TCGA-BH-A0BG | TCGA-AO-A12H  | TCGA-BH-A0BT | TCGA-A8-A082  |                     |

|                     |              |                     |              |  |
|---------------------|--------------|---------------------|--------------|--|
| TCGA-BH-A0BL        | TCGA-E2-A10E | TCGA-BH-A0C1        | TCGA-A8-A085 |  |
| TCGA-BH-A0BW        | TCGA-A2-A0D3 | TCGA-BH-A0DE        | TCGA-A8-A08F |  |
| TCGA-BH-A0E0        | TCGA-E2-A10F | TCGA-BH-A0DI        | TCGA-A8-A08I |  |
| TCGA-BH-A0E6        | TCGA-AO-A03V | TCGA-BH-A0DO        | TCGA-A8-A095 |  |
| TCGA-BH-A0RX        | TCGA-A2-A0EW | TCGA-BH-A0DT        | TCGA-A8-A096 |  |
| TCGA-BH-A18G        | TCGA-BH-A0GY | TCGA-BH-A0DX        | TCGA-A8-A09C |  |
| TCGA-BH-A18Q        | TCGA-A2-A0EV | TCGA-BH-A0E9        | TCGA-A8-A09D |  |
| <b>TCGA-A1-A0SO</b> | TCGA-BH-A0BC | TCGA-BH-A0EI        | TCGA-A8-A09M |  |
| <b>TCGA-A2-A0D2</b> | TCGA-A2-A0YC | TCGA-BH-A0H3        | TCGA-A8-A09Q |  |
| <b>TCGA-AN-A0AL</b> | TCGA-A2-A0EU | TCGA-BH-A0H5        | TCGA-A8-A09R |  |
| <b>TCGA-AN-A0FL</b> | TCGA-A2-A0ET | TCGA-BH-A0HA        | TCGA-A8-A09W |  |
| <b>TCGA-AN-A0FX</b> | TCGA-A2-A04Y | TCGA-BH-A0W4        | TCGA-A8-A0A9 |  |
| <b>TCGA-AN-A0XU</b> | TCGA-BH-A0HQ | TCGA-BH-A0W5        | TCGA-A8-A0AB |  |
| <b>TCGA-AO-A124</b> | TCGA-A2-A0ES | TCGA-BH-A0W7        | TCGA-AN-A03Y |  |
| <b>TCGA-AR-A0U4</b> | TCGA-BH-A0BA | TCGA-BH-A18H        | TCGA-AN-A049 |  |
| <b>TCGA-BH-A0WA</b> | TCGA-E2-A10B | TCGA-BH-A18I        | TCGA-AN-A0FF |  |
| <b>TCGA-B6-A0X1</b> | TCGA-BH-A0B1 | TCGA-C8-A12N        | TCGA-AN-A0FK |  |
|                     | TCGA-BH-A0DH | TCGA-C8-A133        | TCGA-AN-A0FY |  |
|                     | TCGA-BH-A0H9 | TCGA-C8-A1HI        | TCGA-AN-A0XW |  |
|                     | TCGA-AO-A0J9 | TCGA-D8-A141        | TCGA-AR-A0TV |  |
|                     | TCGA-AO-A12G | TCGA-E2-A14Q        | TCGA-AR-A0TZ |  |
|                     | TCGA-BH-A0E7 | TCGA-E2-A14T        | TCGA-AR-A0U3 |  |
|                     | TCGA-AO-A03M | TCGA-E2-A14Z        | TCGA-AR-A1AV |  |
|                     | TCGA-BH-A0BV | TCGA-E2-A153        | TCGA-BH-A0AU |  |
|                     | TCGA-BH-A0B8 | TCGA-E2-A154        | TCGA-BH-A0B5 |  |
|                     | TCGA-A2-A0CZ | TCGA-E2-A156        | TCGA-BH-A0BF |  |
|                     | TCGA-A2-A0SU | TCGA-E2-A15C        | TCGA-BH-A0BZ |  |
|                     | TCGA-AO-A12E | TCGA-E2-A15D        | TCGA-BH-A0W3 |  |
|                     | TCGA-E2-A106 | TCGA-E2-A15F        | TCGA-BH-A18F |  |
|                     | TCGA-A2-A0CV | TCGA-E2-A15G        | TCGA-C8-A12U |  |
|                     | TCGA-A2-A0CS | TCGA-E2-A15I        | TCGA-C8-A12W |  |
|                     | TCGA-A2-A0EO | TCGA-E2-A15J        | TCGA-C8-A12X |  |
|                     | TCGA-A2-A0CQ | TCGA-E2-A15O        | TCGA-C8-A1HG |  |
|                     | TCGA-A2-A0EN | TCGA-E2-A15P        | TCGA-C8-A1HM |  |
|                     | TCGA-AO-A12A | TCGA-E2-A15R        | TCGA-E2-A14O |  |
|                     | TCGA-A2-A0CP | TCGA-E2-A1B4        | TCGA-E2-A14S |  |
|                     | TCGA-AO-A126 | TCGA-E2-A1BC        | TCGA-E2-A15A |  |
|                     | TCGA-AO-A125 | TCGA-E2-A1BD        | TCGA-E2-A15K |  |
|                     | TCGA-A2-A0EM | <b>TCGA-BH-A0DS</b> | TCGA-E2-A15L |  |
|                     | TCGA-A2-A04N | <b>TCGA-A1-A0SH</b> | TCGA-E2-A15M |  |
|                     | TCGA-B6-A0IP | <b>TCGA-E2-A14Z</b> | TCGA-E2-A15T |  |

Table S6 : Relative gene expression in mutated and non mutated TNBC (Taqman Low Density Arrays).

|                        | Mean $\pm$ SEM of non mutated N=13 | Mean $\pm$ SEM of mutated N=15 | Difference between means | P value | P value summary |
|------------------------|------------------------------------|--------------------------------|--------------------------|---------|-----------------|
| <b>ARHGDI1A</b>        | 0.5568 $\pm$ 0.02916               | 0.8428 $\pm$ 0.1085            | -0.2861 $\pm$ 0.1200     | 0.0247  | *               |
| <b>AZI1</b>            | 0.07750 $\pm$ 0.01082              | 0.1292 $\pm$ 0.01769           | -0.05170 $\pm$ 0.02154   | 0.0238  | *               |
| <b>CSNK1D-C17orf56</b> | 0.4446 $\pm$ 0.03376               | 0.7431 $\pm$ 0.09332           | -0.2985 $\pm$ 0.1053     | 0.0087  | **              |
| <b>C17orf56</b>        | 0.04343 $\pm$ 0.005308             | 0.08547 $\pm$ 0.008940         | -0.04205 $\pm$ 0.01082   | 0.0006  | ***             |
| <b>C17orf62</b>        | 0.03805 $\pm$ 0.004920             | 0.06067 $\pm$ 0.006161         | -0.02262 $\pm$ 0.008055  | 0.0093  | **              |
| <b>DUS1L</b>           | 0.05891 $\pm$ 0.006205             | 0.1036 $\pm$ 0.008620          | -0.04467 $\pm$ 0.01092   | 0.0004  | ***             |
| <b>FLJ90757</b>        | 0.02143 $\pm$ 0.003124             | 0.03819 $\pm$ 0.003768         | -0.01675 $\pm$ 0.004987  | 0.0024  | **              |
| <b>FN3KRP</b>          | 0.04102 $\pm$ 0.006002             | 0.08371 $\pm$ 0.01178          | -0.04269 $\pm$ 0.01386   | 0.0048  | **              |
| <b>GPS1</b>            | 0.1413 $\pm$ 0.02175               | 0.2353 $\pm$ 0.02842           | -0.09400 $\pm$ 0.03666   | 0.0165  | *               |
| <b>HGS</b>             | 0.03007 $\pm$ 0.004927             | 0.05330 $\pm$ 0.005143         | -0.02324 $\pm$ 0.007182  | 0.0033  | **              |
| <b>NPLOC4</b>          | 0.1346 $\pm$ 0.01224               | 0.2356 $\pm$ 0.02003           | -0.1010 $\pm$ 0.02438    | 0.0003  | ***             |
| <b>RFNG</b>            | 0.08350 $\pm$ 0.007018             | 0.1306 $\pm$ 0.009284          | -0.04713 $\pm$ 0.01193   | 0.0005  | ***             |
| <b>RPTOR</b>           | 0.05078 $\pm$ 0.004213             | 0.07140 $\pm$ 0.005053         | -0.02062 $\pm$ 0.006701  | 0.0049  | **              |
| <b>SIRT7</b>           | 0.04444 $\pm$ 0.007663             | 0.07391 $\pm$ 0.01073          | -0.02947 $\pm$ 0.01357   | 0.0392  | *               |
| <b>SLC25A10</b>        | 0.04048 $\pm$ 0.005765             | 0.07594 $\pm$ 0.01098          | -0.03546 $\pm$ 0.01298   | 0.0111  | *               |
| <b>SLC38A10</b>        | 0.1918 $\pm$ 0.02096 N             | 0.3440 $\pm$ 0.03219           | -0.1523 $\pm$ 0.03956    | 0.0006  | ***             |
| <b>THOC4</b>           | 0.4631 $\pm$ 0.09149               | 0.8904 $\pm$ 0.1241            | -0.4274 $\pm$ 0.1583     | 0.012   | *               |

Table S7: Relative gene expression in mutated and non mutated TNBC (Taqman qPCR).

|                 | Mean $\pm$ SEM of non mutated N=13 | Mean $\pm$ SEM of mutated N=15 | Difference between means | P value       | P value Summary |
|-----------------|------------------------------------|--------------------------------|--------------------------|---------------|-----------------|
| <b>CSNK1D</b>   | 0.4250 $\pm$ 0.03142               | 0.6500 $\pm$ 0.04857           | 0.2250 $\pm$ 0.05785     | <b>0.0006</b> | ***             |
| <b>RFNG</b>     | 0.1386 $\pm$ 0.01086               | 0.2127 $\pm$ 0.01733           | 0.07409 $\pm$ 0.02045    | <b>0.0011</b> | **              |
| <b>C17orf56</b> | 0.1160 $\pm$ 0.01065               | 0.1729 $\pm$ 0.01583           | 0.05690 $\pm$ 0.01908    | <b>0.0059</b> | **              |
| <b>DUS1L</b>    | 0.3144 $\pm$ 0.03354               | 0.5067 $\pm$ 0.05855           | 0.1923 $\pm$ 0.06748     | <b>0.0081</b> | **              |
| <b>SLC25A10</b> | 0.09083 $\pm$ 0.01059              | 0.1822 $\pm$ 0.02978           | 0.09133 $\pm$ 0.03161    | <b>0.0074</b> | **              |
| <b>HGS</b>      | 0.2615 $\pm$ 0.02847               | 0.3944 $\pm$ 0.04137           | 0.1329 $\pm$ 0.05022     | <b>0.0132</b> | *               |
| <b>FN3KRP</b>   | 0.06314 $\pm$ 0.008737             | 0.1130 $\pm$ 0.01853           | 0.04990 $\pm$ 0.02049    | <b>0.0215</b> | *               |
| <b>SIRT7</b>    | 0.08396 $\pm$ 0.007473             | 0.1349 $\pm$ 0.02050           | 0.05094 $\pm$ 0.02182    | <b>0.027</b>  | *               |

Table S8: Identification in the COLT-Cancer database (<http://dpsc.cbr.utoronto.ca/cancer/>) of genes of the 17q25.3 region essential for survival of human cancer cell lines (29 breast, 15 ovarian, 6 colon and 28 pancreatic cell lines). The number and percentage of cell lines in which the gene is essential are indicated.

|               | Pancreatic | Ovarian  | Breast    | Colon    |
|---------------|------------|----------|-----------|----------|
| <b>AZI1</b>   | 14 (50%)   | 8 (53%)  | 7 (24%)   | 3 (50%)  |
| <b>FN3KRP</b> | 11 (39%)   | 3 (20%)  | 10 (34%)  | 3 (50%)  |
| <b>HGS</b>    | 5 (17%)    | 3 (20%)  | 11 (37%)  |          |
| <b>RPTOR</b>  | 20 (71%)   | 6 (40%)  | 25 (86%)  | 2 (33%)  |
| <b>CSNK1D</b> |            |          | 1 (3%)    |          |
| <b>DUS1L</b>  | 2 (7%)     |          | 1 (3%)    |          |
| <b>GPS1</b>   | 8 (28%)    | 4 (26%)  | 7 (24%)   | 1 (16%)  |
| <b>RFNG</b>   |            |          | 1 (3%)    |          |
| <b>THOC4</b>  | 27 (96%)   | 14 (93%) | 29 (100%) | 6 (100%) |



|                                                      |                       | <i>ARHGDI1A</i> | <i>AZI1</i> | <i>C17orf56</i> | <i>C17orf62</i> | <i>CSNK1D</i> | <i>DUS1L</i> | <i>FLJ90757</i> | <i>FN3KRP</i> | <i>GPS1</i> | HGS | <i>NPLOC4</i> | <i>RFNG</i> | <i>RPTOR</i> | <i>SIRT7</i> | <i>SCL25A10</i> | <i>SCL38A10</i> | <i>THOC4</i> |   |  |
|------------------------------------------------------|-----------------------|-----------------|-------------|-----------------|-----------------|---------------|--------------|-----------------|---------------|-------------|-----|---------------|-------------|--------------|--------------|-----------------|-----------------|--------------|---|--|
| Increased gamma-H2AX phosphorylation and DNA content | DNA damage response   |                 | X           |                 |                 |               |              |                 |               | X           |     |               |             |              |              |                 |                 |              |   |  |
| Decreased homologous recombination repair frequency  |                       |                 |             |                 |                 |               |              |                 |               | X           |     |               |             | X            |              |                 |                 |              | X |  |
| Increased ionizing radiation sensitivity             |                       | X               |             |                 |                 |               |              |                 |               |             |     |               |             |              |              |                 |                 |              |   |  |
| Synthetic lethal with gemcitabine                    |                       |                 |             |                 |                 |               | X            |                 |               |             |     |               |             |              |              |                 |                 |              |   |  |
| Sensitivity to cisplatin                             |                       | X               |             |                 |                 |               |              |                 |               |             |     |               |             |              |              |                 |                 |              |   |  |
| Decreased nuclei in G1, small nuclei in G1           | Cell cycle regulation |                 | X           |                 |                 |               |              |                 | X             |             |     |               |             |              | X            |                 |                 |              |   |  |
| Cell division defect                                 |                       |                 |             |                 | X               |               |              |                 |               |             |     |               |             |              |              |                 |                 |              |   |  |
| Increased cell death                                 | Cell viability        | X               |             |                 |                 |               |              |                 |               |             | X   |               |             |              |              |                 |                 |              |   |  |
| Decreased viability                                  |                       |                 |             |                 | X               |               | X            |                 |               | X           | X   |               |             | X            | X            |                 |                 |              | X |  |
| Synthetic lethal interaction with Ras                |                       |                 |             |                 | X               |               |              |                 |               |             |     |               |             |              |              |                 |                 |              |   |  |
| Decreased cell migration                             | Migration             |                 |             |                 |                 | X             |              |                 |               |             |     |               |             |              |              |                 |                 |              |   |  |

Table S9: Phenotypes resulting from the inactivation of genes of the 17q25.3 region in publicly available shRNA screens (obtained from the GenomeRNAi database: <http://www.genomernai.org>).

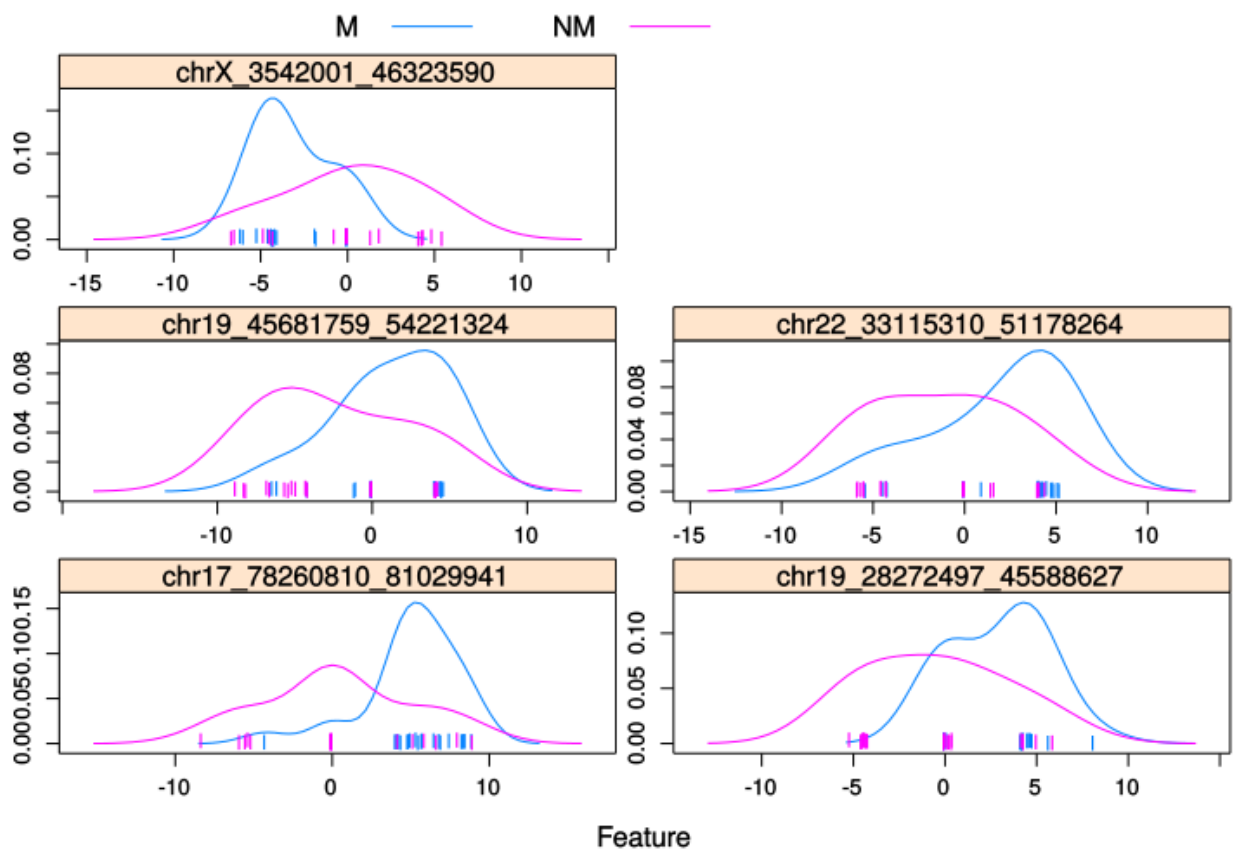

Figure S1: Density plots of the 5 most important variables ((to be read as such: chr.number\_start.base\_stop.base. 'M' = mutated. 'NM' = non mutated)).

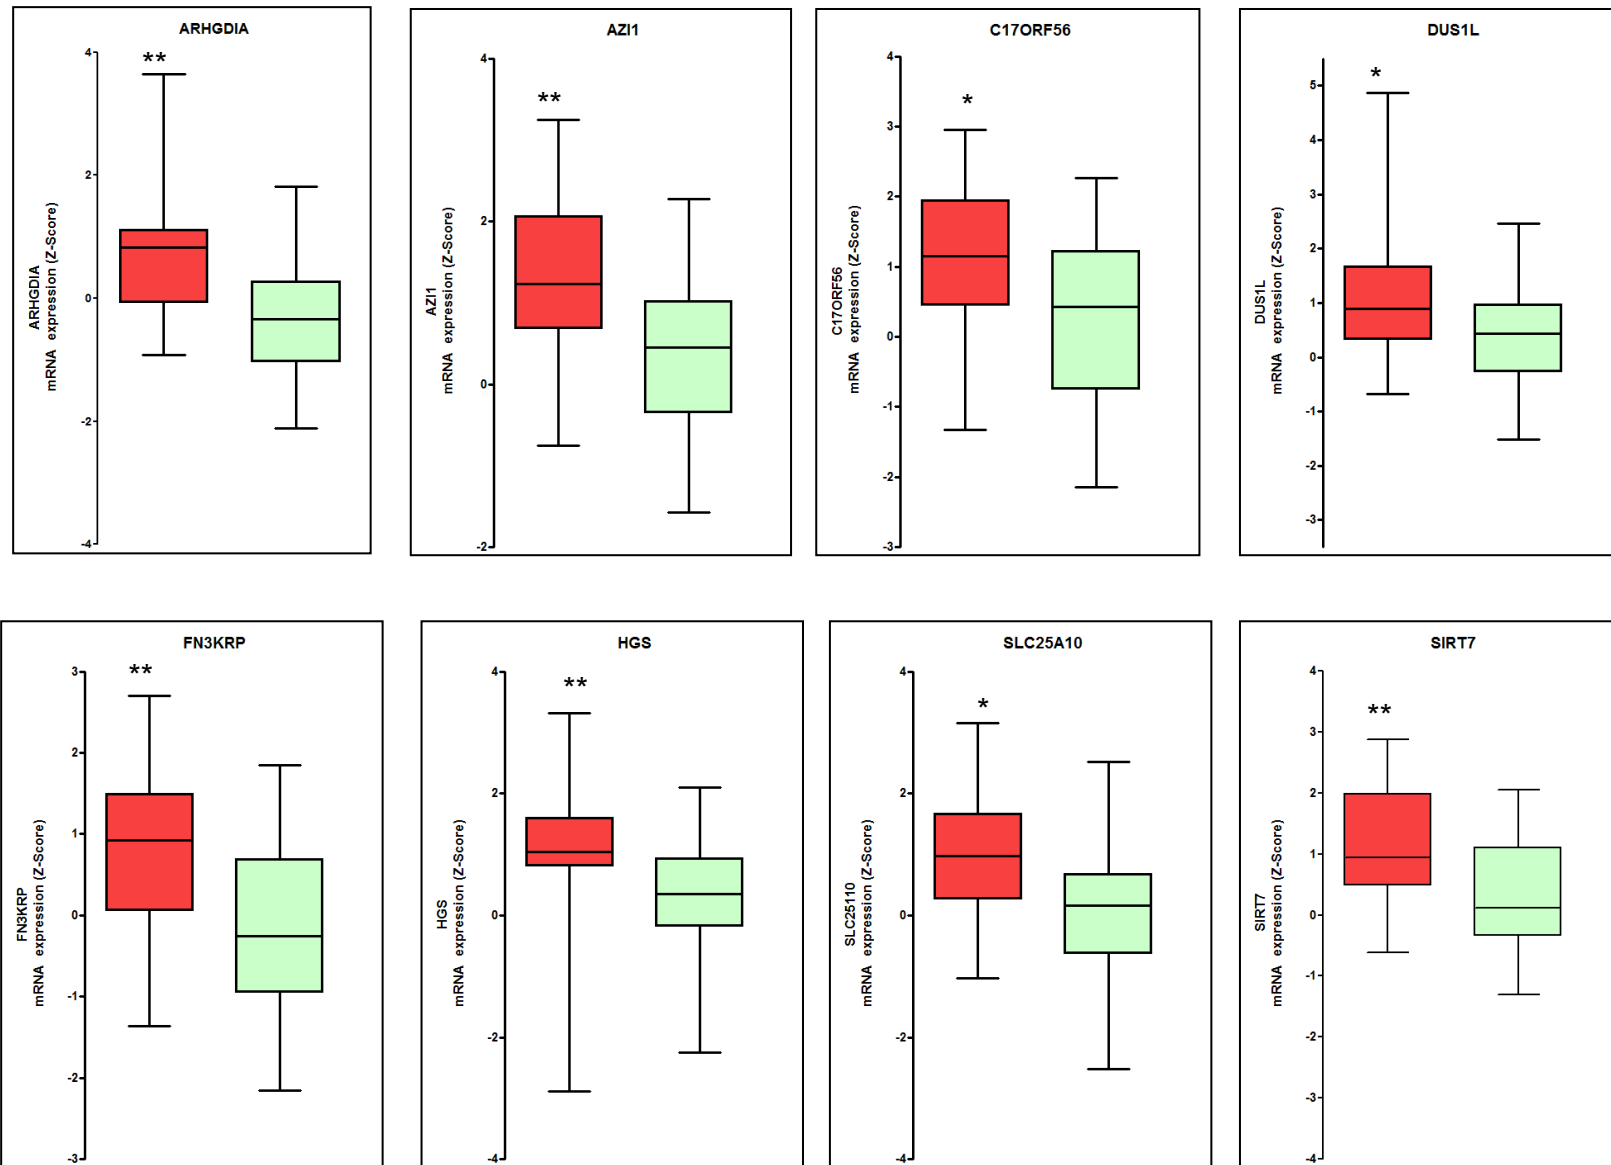

Figure S2: Z-score (retrieved from cBioportal Cancer) for 26 TNBC with a gain in 17q25.3 (red box) and 30 TNBC without a gain in 17q25.3 (green box)

(whiskers : minimum and maximum. bar : median). Statistical analysis: Mann-Whitney-Wilcoxon test:  $p < 0.05$ :\*.  $p < 0.01$ :\*\*.  $p < 0.001$ :\*\*\*.

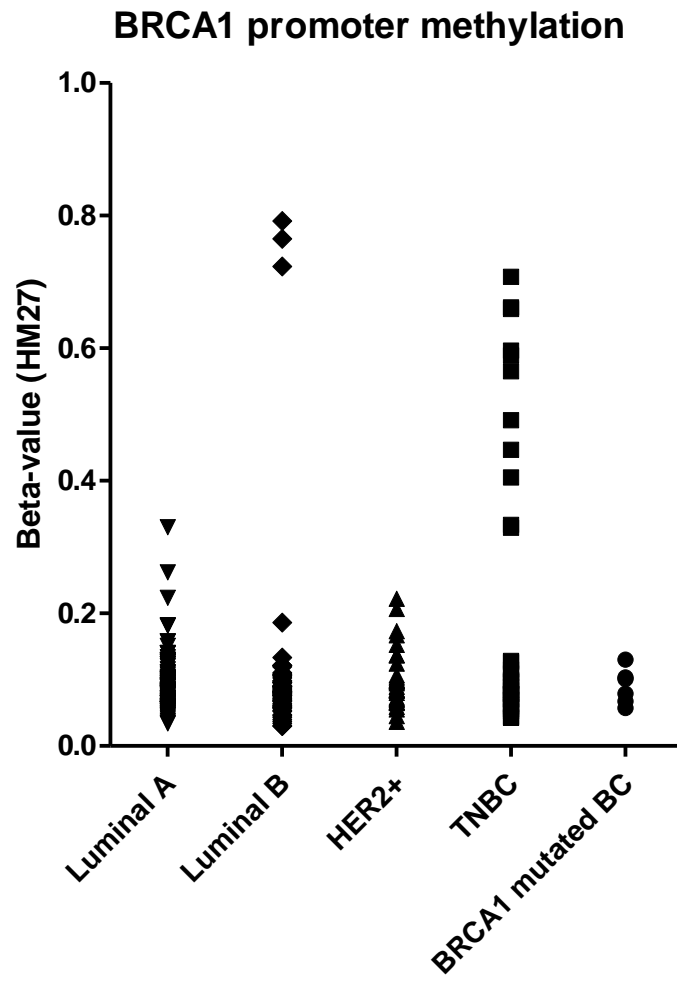

Figure S3: Analysis of the *BRCA1* promoter methylation in the TCGA study. DNA methylation data are presented as beta values, with 0 indicating 0 % DNA methylation and beta values of 1 indicating 100 % DNA methylation.
